# Supplementary material for: Deep annotation of mouse iso-miR and iso-moR variation
Source: PubMed Central journal article supplement — Nucleic Acids Res. 2012 Mar 19;40(13):5864–75. doi: 10.1093/nar/gks247 (PMC3401436; doi:10.1093/nar/gks247), 2012-03-19
Supplement: supp_gks247_nar-00481-n-2012-File003.pdf [file supp_gks247_nar-00481-n-2012-File003.pdf]

# SUPPLEMENTARY MATERIAL

## Deep annotation of mouse iso-miR and iso-moR variation

Hongjun Zhou<sup>1</sup>, Mary Luz Arcila<sup>1</sup>, Zhonghan Li<sup>2</sup>, Eunjoo Lee<sup>1</sup>, Christine Henzler<sup>1</sup>, Jingya Liu<sup>2</sup>, Tariq M. Rana<sup>2</sup> and Kenneth S. Kosik<sup>1,\*</sup>

<sup>1</sup>Neuroscience Research Institute and Department of Cellular Molecular and Developmental Biology, University of California, Santa Barbara, CA 93106, USA

<sup>2</sup>Program for RNA Biology, Sanford-Burnham Medical Research Institute, 10901 North Torrey Pines Road, La Jolla, CA 92037

\* To whom correspondence should be addressed. Tel: 1 805 893 5222; Fax: 1 805 893 2005; Email: Kosik@lifesci.ucsb.edu

|                                      |    |
|--------------------------------------|----|
| SUPPLEMENTARY MATERIAL .....         | 1  |
| I Supplementary Figure Legends.....  | 3  |
| II Supplementary Tables S1-S6.....   | 4  |
| III Supplementary Figures S1-S6..... | 88 |
| IV Supplementary Dataset S1-S3.....  | 94 |

## I Supplementary Figure Legends

Supplementary Figure S1. Work flow of sequence mapping.

Supplementary Figure S2. Highly expressed miRNAs in Hippocampus-AGO-IP, Hippocampus total RNA and Reprogramming-total RNA which contributed more than 1% of total small RNAs in at least one group are showed.

Supplementary Figure S3. Strand preferences of miRNAs in different samples. (A) Log Ratios of 5p/3p were binned and the frequency is shown. miRNAs with at least 50 reads from non-preferred strands were included.

(B) miRNAs grouped by preferred strands. miRNAs with at least 100 reads from preferred strands were included.

Supplementary Figure S4. Correlation of expressions between 5p strands and 3p strands of miRNAs.

Supplementary Figure S5. Correlation of the ratio of miRNA/miRNA\* between Hippocampus-AGO-IP data and Hippocampus-total RNA data. The preferred strand and non-preferred strand were defined based on the entire data set. The ratio of expressed miRNA/miRNA\* for each miRNA in each group was calculated and the scatter plot of the log value is shown. The black solid line is the mid-line of the boundary. More miRNA fall above the solid line and in the AGO-IP sample there is a higher miRNA/miRNA\* ratio.

Supplementary Figure S6. Length distributions of pre-miRNAs. miRNAs with at least 10 reads from the non-preferred strand were included.

## II Supplementary Tables S1-S6

Supplementary Table S1. Small RNA datasets

|                                      | Samples   | Datasets              | Sequenced   | Known miRNAs | Others in Genome |
|--------------------------------------|-----------|-----------------------|-------------|--------------|------------------|
| Group I<br>Hippocampus<br>-total RNA | Control1  | Mix_2_10_02103_35     | 5,075,999   | 1,080,943    | 632,452          |
|                                      |           | Mix_1_10_02103_35     | 5,273,821   | 1,108,317    | 691,858          |
|                                      | NAIO4     | Mix_2_5_31013_35      | 25,339,198  | 13,283,557   | 4,889,532        |
|                                      |           | Mix_1_5_31013_35      | 28,444,803  | 14,150,675   | 5,674,628        |
|                                      | Female    | Female_A_35           | 9,181,457   | 3,370,640    | 2,741,827        |
|                                      | Male      | Mouse_A_35            | 14,833,260  | 6,476,125    | 4,055,856        |
|                                      | Control2  | controlA_25           | 6,951,805   | 2,687,354    | 2,294,352        |
|                                      | SB_treat  | SBa_1_25              | 18,455,965  | 7,253,946    | 5,527,185        |
| SBa_2_25                             |           | 18,288,895            | 7,189,687   | 5,576,848    |                  |
| Hippocampus<br>-AGO-IP               | AGO_1     | AGO_1_35              | 17,913,958  | 1,736,396    | 2,427,010        |
|                                      |           | Ago_1_25              | 14,418,998  | 1,036,141    | 2,565,512        |
|                                      |           | Clip_Ago_1_25         | 17,020,783  | 1,404,069    | 3,946,382        |
|                                      | AGO_2     | AGO_2_35              | 15,918,431  | 7,199,251    | 4,669,320        |
|                                      |           | Ago_2_25              | 16,442,881  | 7,502,677    | 4,909,341        |
|                                      |           | Cllip_Ago_2_25        | 16,324,414  | 6,684,232    | 5,376,464        |
|                                      | AGO_28A   | Total_AGO_28a_35      | 17,296,946  | 7,929,593    | 5,036,434        |
|                                      |           | Clip_total_ago_2A8_25 | 16,233,793  | 7,009,308    | 5,188,848        |
| total_ago_2A8_25                     |           | 12,742,052            | 7,397,015   | 3,747,999    |                  |
| Group II<br>Reprogramming-total RNA  | GFP+      | GFP_positive_35       | 14,898,741  | 2,548,362    | 2,279,070        |
|                                      |           | 12_35                 | 29,494,134  | 6,316,213    | 6,187,408        |
|                                      | MEF       | MEF_35                | 16,395,879  | 7,462,780    | 2,364,927        |
|                                      |           | 9_35                  | 26,894,168  | 12,575,947   | 4,777,315        |
|                                      | SSEA1+    | SSEA1_positive_35     | 16,939,887  | 812,440      | 927,911          |
|                                      |           | 11_35                 | 28,599,128  | 6,214,482    | 6,143,676        |
|                                      | ipS_cells | ipS_cells_35          | 16,787,762  | 5,049,606    | 2,667,574        |
|                                      |           | 13_35                 | 24,403,899  | 3,975,597    | 3,000,245        |
|                                      | mES_cells | mES_cells_35          | 16,478,336  | 5,791,778    | 2,806,208        |
|                                      |           | 14_35                 | 28,300,437  | 8,558,302    | 6,720,644        |
|                                      | piPS_4    | piPS_4_35             | 16,927,697  | 4,266,318    | 2,411,371        |
|                                      |           | 15_35                 | 27,870,512  | 9,634,958    | 5,021,525        |
|                                      | piPS_5    | piPS_5_35             | 15,971,861  | 3,619,719    | 2,215,585        |
|                                      |           | 16_35                 | 24,506,237  | 7,249,892    | 3,690,809        |
|                                      | Thy-      | thy_negative_35       | 17,351,944  | 2,920,774    | 1,507,610        |
| 10_35                                |           | 27,786,586            | 7,825,044   | 4,851,704    |                  |
| Total                                | 17        | 34                    | 625,764,667 | 199,322,138  | 127,525,430      |

Supplementary Table S2. Phased reads of 5p/3p, moRs and loops in Hippocampus-total RNA samples.

| miRNAs         | 5moR | 5p      | loop | 3p      | 3moR |
|----------------|------|---------|------|---------|------|
| mmu-mir-124-1  | 6    | 38250   | 2    | 5982006 | 18   |
| mmu-mir-124-3  | 71   | 38224   | 1    | 5981617 | 0    |
| mmu-mir-124-2  | 8    | 38250   | 1    | 5981602 | 15   |
| mmu-mir-29a    | 2    | 8489    | 0    | 5820216 | 2    |
| mmu-mir-125b-2 | 150  | 4150058 | 0    | 11180   | 0    |
| mmu-mir-125b-1 | 34   | 4081771 | 4    | 1749    | 3    |
| mmu-mir-29c    | 3    | 27664   | 2    | 1950800 | 2    |
| mmu-mir-138-1  | 11   | 1851395 | 6    | 18639   | 9    |
| mmu-mir-138-2  | 65   | 1794764 | 1018 | 10416   | 2    |
| mmu-mir-29b-1  | 0    | 7723    | 2    | 1738646 | 5    |
| mmu-mir-128-2  | 30   | 1368    | 3    | 1652120 | 8    |
| mmu-mir-125a   | 84   | 1644016 | 0    | 3415    | 3    |
| mmu-mir-24-2   | 18   | 12525   | 2    | 1617433 | 2    |
| mmu-mir-128-1  | 16   | 1109    | 0    | 1619750 | 0    |
| mmu-mir-24-1   | 83   | 2140    | 1    | 1617433 | 62   |
| mmu-mir-29b-2  | 5    | 27660   | 1    | 1589222 | 3    |
| mmu-mir-9-1    | 10   | 1182843 | 9    | 305196  | 4    |
| mmu-mir-9-2    | 4    | 1182839 | 3    | 305195  | 4    |
| mmu-mir-9-3    | 2    | 1182622 | 1    | 233558  | 41   |
| mmu-mir-26a-2  | 2    | 1299872 | 1    | 961     | 2    |
| mmu-mir-26a-1  | 2    | 1299707 | 5    | 820     | 0    |
| mmu-mir-218-1  | 6    | 1262113 | 12   | 1779    | 1    |
| mmu-mir-129-2  | 13   | 34434   | 27   | 1161734 | 5    |
| mmu-mir-218-2  | 18   | 1112814 | 190  | 5411    | 2    |
| mmu-mir-99a    | 1    | 1037684 | 0    | 13735   | 2    |
| mmu-mir-204    | 60   | 770688  | 10   | 2431    | 1    |
| mmu-mir-103-2  | 20   | 1451    | 1    | 587157  | 1    |
| mmu-mir-103-1  | 10   | 978     | 1    | 586537  | 2    |
| mmu-mir-328    | 49   | 104     | 10   | 536527  | 3    |
| mmu-mir-191    | 2    | 524453  | 8    | 1617    | 4    |
| mmu-let-7g     | 0    | 512497  | 0    | 4976    | 5    |
| mmu-mir-30c-2  | 60   | 509877  | 4    | 1036    | 1    |
| mmu-mir-30c-1  | 33   | 509665  | 2    | 300     | 4    |
| mmu-let-7f-2   | 15   | 490277  | 1    | 19023   | 7    |
| mmu-let-7f-1   | 3    | 475105  | 0    | 6371    | 2    |
| mmu-mir-126    | 50   | 171986  | 3    | 306648  | 21   |
| mmu-mir-145    | 15   | 458128  | 2    | 1861    | 2    |
| mmu-let-7b     | 26   | 412132  | 88   | 10299   | 3    |

|                |     |        |     |        |     |
|----------------|-----|--------|-----|--------|-----|
| mmu-mir-23b    | 13  | 1046   | 0   | 388442 | 1   |
| mmu-let-7c-1   | 3   | 361794 | 745 | 6253   | 2   |
| mmu-let-7c-2   | 5   | 366596 | 2   | 40     | 1   |
| mmu-mir-181a-1 | 5   | 301590 | 2   | 14126  | 1   |
| mmu-mir-107    | 6   | 3277   | 1   | 310736 | 3   |
| mmu-mir-434    | 23  | 47245  | 3   | 260485 | 0   |
| mmu-mir-338    | 43  | 30316  | 1   | 274480 | 0   |
| mmu-mir-181a-2 | 0   | 301592 | 7   | 2592   | 4   |
| mmu-mir-139    | 20  | 299453 | 1   | 3763   | 1   |
| mmu-let-7a-1   | 5   | 300911 | 34  | 40     | 2   |
| mmu-let-7a-2   | 5   | 297696 | 17  | 1838   | 2   |
| mmu-mir-7a-1   | 5   | 196915 | 1   | 70650  | 7   |
| mmu-mir-129-1  | 7   | 34439  | 4   | 231812 | 0   |
| mmu-mir-132    | 35  | 59199  | 3   | 206309 | 13  |
| mmu-mir-23a    | 2   | 234    | 0   | 246809 | 2   |
| mmu-mir-149    | 3   | 240555 | 4   | 115    | 0   |
| mmu-mir-7a-2   | 3   | 194927 | 4   | 25877  | 2   |
| mmu-mir-101a   | 2   | 2490   | 1   | 216954 | 1   |
| mmu-mir-495    | 41  | 288    | 1   | 217602 | 1   |
| mmu-mir-150    | 395 | 199207 | 0   | 351    | 71  |
| mmu-mir-30d    | 4   | 196310 | 1   | 292    | 0   |
| mmu-mir-1249   | 7   | 31     | 0   | 188186 | 2   |
| mmu-mir-30b    | 9   | 185028 | 0   | 1594   | 5   |
| mmu-mir-100    | 2   | 181389 | 2   | 1317   | 0   |
| mmu-mir-127    | 6   | 20059  | 0   | 155866 | 0   |
| mmu-mir-30a    | 6   | 154195 | 2   | 19532  | 2   |
| mmu-mir-30e    | 8   | 143972 | 27  | 25823  | 804 |
| mmu-mir-342    | 0   | 2500   | 4   | 165549 | 3   |
| mmu-mir-487b   | 4   | 104    | 7   | 159050 | 0   |
| mmu-let-7e     | 6   | 151149 | 21  | 6542   | 0   |
| mmu-mir-92b    | 4   | 1490   | 6   | 154113 | 12  |
| mmu-mir-222    | 47  | 2117   | 1   | 150480 | 2   |
| mmu-mir-135a-2 | 8   | 142083 | 0   | 6270   | 2   |
| mmu-mir-135a-1 | 7   | 141920 | 0   | 1037   | 1   |
| mmu-mir-140    | 18  | 16448  | 2   | 125032 | 2   |
| mmu-mir-136    | 28  | 103660 | 0   | 37124  | 2   |
| mmu-let-7d     | 18  | 105316 | 1   | 33724  | 2   |
| mmu-mir-21     | 63  | 137433 | 1   | 1078   | 4   |
| mmu-mir-382    | 2   | 99489  | 2   | 37003  | 2   |
| mmu-mir-34a    | 0   | 110515 | 1   | 14597  | 2   |
| mmu-mir-484    | 9   | 123712 | 0   | 64     | 0   |

|                |     |        |     |        |    |
|----------------|-----|--------|-----|--------|----|
| mmu-mir-3102   | 13  | 2006   | 0   | 114174 | 5  |
| mmu-mir-331    | 33  | 1096   | 1   | 112330 | 0  |
| mmu-mir-34c    | 2   | 101175 | 0   | 10853  | 6  |
| mmu-mir-551b   | 5   | 839    | 5   | 107931 | 1  |
| mmu-mir-541    | 1   | 104842 | 2   | 2495   | 0  |
| mmu-mir-130a   | 5   | 1446   | 0   | 105624 | 1  |
| mmu-mir-181b-1 | 2   | 106086 | 2   | 923    | 5  |
| mmu-mir-219-2  | 31  | 15757  | 380 | 88071  | 2  |
| mmu-mir-181b-2 | 0   | 103836 | 0   | 133    | 5  |
| mmu-let-7i     | 29  | 94756  | 4   | 7880   | 4  |
| mmu-mir-34b    | 17  | 51682  | 1   | 50666  | 2  |
| mmu-mir-708    | 1   | 91137  | 9   | 6870   | 2  |
| mmu-mir-666    | 3   | 2688   | 0   | 95137  | 0  |
| mmu-mir-376b   | 5   | 13379  | 3   | 84153  | 0  |
| mmu-mir-16-1   | 88  | 95758  | 21  | 513    | 3  |
| mmu-mir-361    | 5   | 73875  | 3   | 20577  | 44 |
| mmu-mir-137    | 32  | 1751   | 7   | 92036  | 3  |
| mmu-mir-16-2   | 5   | 92869  | 2   | 773    | 0  |
| mmu-mir-301a   | 8   | 907    | 1   | 89380  | 5  |
| mmu-mir-337    | 8   | 21879  | 0   | 67051  | 2  |
| mmu-mir-667    | 3   | 730    | 2   | 87559  | 4  |
| mmu-mir-143    | 3   | 52     | 1   | 86807  | 5  |
| mmu-mir-221    | 9   | 6317   | 16  | 80348  | 0  |
| mmu-mir-151    | 7   | 76677  | 0   | 9112   | 4  |
| mmu-mir-330    | 4   | 8554   | 6   | 75474  | 3  |
| mmu-mir-409    | 2   | 19041  | 0   | 64224  | 4  |
| mmu-mir-212    | 0   | 18617  | 0   | 61693  | 2  |
| mmu-mir-326    | 0   | 12     | 0   | 79179  | 2  |
| mmu-mir-31     | 4   | 59707  | 1   | 18958  | 6  |
| mmu-mir-365-2  | 3   | 212    | 2   | 77182  | 2  |
| mmu-mir-365-1  | 12  | 24     | 0   | 77180  | 3  |
| mmu-mir-27b    | 20  | 1897   | 0   | 74706  | 5  |
| mmu-mir-1839   | 0   | 54581  | 1   | 20705  | 6  |
| mmu-mir-22     | 2   | 50854  | 1   | 21168  | 4  |
| mmu-mir-296    | 14  | 68681  | 0   | 1017   | 2  |
| mmu-mir-378    | 5   | 9324   | 1   | 59136  | 3  |
| mmu-mir-582    | 3   | 40053  | 0   | 26444  | 3  |
| mmu-mir-195    | 13  | 61526  | 0   | 4467   | 6  |
| mmu-mir-598    | 726 | 348    | 0   | 63213  | 42 |
| mmu-mir-384    | 112 | 26130  | 1   | 36295  | 1  |
| mmu-mir-668    | 29  | 92     | 4   | 61682  | 13 |

|               |    |       |    |       |    |
|---------------|----|-------|----|-------|----|
| mmu-mir-187   | 3  | 5656  | 0  | 56004 | 1  |
| mmu-mir-26b   | 7  | 58404 | 3  | 2263  | 1  |
| mmu-mir-369   | 4  | 30867 | 0  | 29789 | 2  |
| mmu-mir-7b    | 15 | 56621 | 0  | 3978  | 1  |
| mmu-mir-543   | 8  | 1622  | 1  | 58554 | 1  |
| mmu-mir-185   | 2  | 58970 | 0  | 357   | 4  |
| mmu-mir-345   | 5  | 57946 | 5  | 1341  | 3  |
| mmu-mir-744   | 20 | 51810 | 0  | 6934  | 1  |
| mmu-mir-99b   | 5  | 51199 | 0  | 7485  | 0  |
| mmu-mir-154   | 5  | 36110 | 0  | 22354 | 0  |
| mmu-mir-872   | 6  | 13356 | 4  | 41113 | 1  |
| mmu-mir-323   | 7  | 2217  | 0  | 52153 | 1  |
| mmu-mir-411   | 7  | 33477 | 0  | 20008 | 1  |
| mmu-mir-93    | 2  | 45297 | 0  | 7450  | 1  |
| mmu-mir-320   | 1  | 24    | 0  | 52229 | 3  |
| mmu-mir-17    | 15 | 44942 | 20 | 6580  | 4  |
| mmu-mir-27a   | 25 | 198   | 12 | 51237 | 12 |
| mmu-mir-19b-1 | 1  | 3319  | 1  | 47557 | 0  |
| mmu-mir-329   | 2  | 8092  | 0  | 42385 | 2  |
| mmu-mir-106b  | 4  | 43606 | 3  | 4481  | 1  |
| mmu-mir-376a  | 3  | 5217  | 0  | 41384 | 0  |
| mmu-mir-193b  | 4  | 1110  | 2  | 45363 | 3  |
| mmu-mir-181c  | 4  | 37958 | 3  | 7532  | 12 |
| mmu-mir-101b  | 5  | 29    | 1  | 43068 | 5  |
| mmu-mir-532   | 10 | 32160 | 2  | 10428 | 7  |
| mmu-mir-19b-2 | 1  | 5     | 3  | 42350 | 1  |
| mmu-mir-344-2 | 7  | 63    | 0  | 42250 | 3  |
| mmu-mir-344-1 | 7  | 63    | 2  | 42250 | 0  |
| mmu-mir-346   | 3  | 41807 | 2  | 8     | 2  |
| mmu-mir-379   | 9  | 29784 | 5  | 9455  | 2  |
| mmu-mir-497   | 4  | 34917 | 2  | 3301  | 9  |
| mmu-mir-92a-1 | 0  | 84    | 0  | 38035 | 2  |
| mmu-mir-376c  | 0  | 1594  | 0  | 35172 | 3  |
| mmu-mir-340   | 3  | 13997 | 9  | 22360 | 2  |
| mmu-mir-674   | 36 | 7152  | 1  | 28477 | 1  |
| mmu-mir-335   | 3  | 28998 | 3  | 6450  | 2  |
| mmu-mir-20b   | 2  | 16634 | 0  | 18407 | 3  |
| mmu-mir-20a   | 3  | 30206 | 3  | 3181  | 7  |
| mmu-mir-362   | 8  | 20070 | 6  | 12780 | 0  |
| mmu-mir-324   | 34 | 25244 | 0  | 7345  | 5  |
| mmu-mir-664   | 1  | 567   | 0  | 32016 | 6  |



|                |     |       |    |       |    |
|----------------|-----|-------|----|-------|----|
| mmu-mir-500    | 12  | 2686  | 0  | 29763 | 6  |
| mmu-mir-425    | 3   | 20214 | 1  | 12059 | 5  |
| mmu-mir-1-2    | 0   | 8496  | 2  | 23562 | 0  |
| mmu-mir-300    | 20  | 2120  | 5  | 29200 | 0  |
| mmu-mir-574    | 0   | 6776  | 4  | 22951 | 3  |
| mmu-mir-322    | 0   | 7581  | 0  | 22108 | 2  |
| mmu-mir-211    | 2   | 29308 | 0  | 9     | 7  |
| mmu-mir-223    | 2   | 6779  | 3  | 21865 | 4  |
| mmu-mir-15a    | 7   | 26762 | 1  | 1556  | 0  |
| mmu-mir-383    | 3   | 27325 | 1  | 634   | 3  |
| mmu-mir-153    | 3   | 354   | 1  | 27576 | 2  |
| mmu-mir-192    | 3   | 23122 | 1  | 4063  | 4  |
| mmu-mir-1298   | 7   | 24914 | 0  | 1627  | 6  |
| mmu-mir-15b    | 3   | 21425 | 0  | 4949  | 0  |
| mmu-mir-433    | 16  | 2537  | 0  | 23777 | 3  |
| mmu-mir-874    | 2   | 5798  | 2  | 19751 | 0  |
| mmu-mir-92a-2  | 2   | 2072  | 0  | 22231 | 7  |
| mmu-mir-544    | 0   | 3947  | 3  | 20201 | 1  |
| mmu-mir-339    | 12  | 22611 | 0  | 1392  | 4  |
| mmu-mir-1-1    | 23  | 422   | 2  | 23560 | 2  |
| mmu-mir-671    | 2   | 18048 | 0  | 5882  | 0  |
| mmu-mir-199b   | 3   | 23655 | 0  | 3     | 3  |
| mmu-mir-341    | 2   | 5     | 0  | 23119 | 6  |
| mmu-mir-350    | 0   | 46    | 1  | 22443 | 1  |
| mmu-mir-676    | 2   | 7618  | 0  | 14416 | 3  |
| mmu-mir-210    | 0   | 804   | 0  | 20835 | 6  |
| mmu-mir-186    | 0   | 19013 | 2  | 2196  | 2  |
| mmu-mir-381    | 6   | 2429  | 2  | 18615 | 3  |
| mmu-mir-370    | 2   | 5320  | 2  | 15556 | 24 |
| mmu-mir-764    | 1   | 14245 | 2  | 6364  | 2  |
| mmu-mir-485    | 110 | 5878  | 35 | 14222 | 5  |
| mmu-mir-421    | 0   | 1953  | 0  | 18252 | 5  |
| mmu-mir-344d-2 | 3   | 224   | 0  | 19341 | 2  |
| mmu-mir-344d-3 | 1   | 212   | 2  | 19341 | 2  |
| mmu-mir-344d-1 | 1   | 4     | 4  | 19348 | 0  |
| mmu-mir-770    | 81  | 6398  | 0  | 11809 | 16 |
| mmu-mir-652    | 15  | 216   | 2  | 17744 | 1  |
| mmu-mir-700    | 5   | 8240  | 1  | 9168  | 7  |
| mmu-mir-451    | 0   | 16975 | 1  | 365   | 1  |
| mmu-mir-33     | 11  | 7539  | 6  | 9678  | 5  |
| mmu-mir-410    | 49  | 166   | 0  | 16997 | 5  |

|               |     |       |   |       |    |
|---------------|-----|-------|---|-------|----|
| mmu-mir-494   | 2   | 48    | 0 | 15820 | 1  |
| mmu-mir-496   | 13  | 263   | 1 | 15240 | 3  |
| mmu-mir-380   | 4   | 6020  | 0 | 9206  | 6  |
| mmu-mir-135b  | 3   | 14933 | 9 | 202   | 2  |
| mmu-mir-505   | 1   | 2647  | 0 | 12393 | 4  |
| mmu-mir-463   | 2   | 14563 | 1 | 423   | 1  |
| mmu-mir-873   | 6   | 12931 | 0 | 1707  | 4  |
| mmu-mir-134   | 436 | 11061 | 2 | 2844  | 3  |
| mmu-mir-501   | 5   | 9421  | 2 | 4645  | 0  |
| mmu-mir-219-1 | 3   | 10795 | 0 | 3269  | 6  |
| mmu-mir-455   | 55  | 1962  | 0 | 12021 | 3  |
| mmu-mir-203   | 28  | 491   | 1 | 13371 | 1  |
| mmu-mir-702   | 0   | 30    | 0 | 13564 | 20 |
| mmu-mir-665   | 6   | 29    | 1 | 13526 | 3  |
| mmu-mir-672   | 3   | 11561 | 0 | 1922  | 0  |
| mmu-mir-877   | 3   | 1082  | 0 | 12262 | 1  |
| mmu-mir-224   | 2   | 12491 | 0 | 744   | 5  |
| mmu-mir-18a   | 2   | 8039  | 3 | 5173  | 0  |
| mmu-mir-431   | 3   | 5577  | 4 | 7172  | 38 |
| mmu-mir-743a  | 0   | 212   | 0 | 12316 | 0  |
| mmu-mir-130b  | 1   | 9412  | 1 | 2816  | 2  |
| mmu-mir-25    | 4   | 1312  | 0 | 10810 | 3  |
| mmu-mir-469   | 2   | 11869 | 1 | 17    | 3  |
| mmu-mir-542   | 2   | 6182  | 2 | 5681  | 2  |
| mmu-mir-363   | 0   | 40    | 1 | 11798 | 7  |
| mmu-mir-98    | 6   | 10460 | 1 | 1368  | 2  |
| mmu-mir-448   | 25  | 4951  | 0 | 6855  | 1  |
| mmu-mir-670   | 1   | 11237 | 4 | 564   | 9  |
| mmu-mir-1843  | 0   | 4598  | 0 | 7063  | 5  |
| mmu-mir-374   | 2   | 4871  | 0 | 6425  | 2  |
| mmu-mir-146b  | 2   | 10858 | 0 | 342   | 3  |
| mmu-mir-146a  | 3   | 11065 | 0 | 93    | 3  |
| mmu-mir-181d  | 0   | 11053 | 2 | 60    | 1  |
| mmu-mir-200a  | 0   | 1258  | 2 | 9333  | 4  |
| mmu-mir-325   | 1   | 7808  | 1 | 2604  | 42 |
| mmu-mir-3068  | 1   | 4688  | 2 | 5468  | 3  |
| mmu-mir-1264  | 1   | 817   | 1 | 9119  | 3  |
| mmu-mir-190   | 2   | 7107  | 0 | 2778  | 2  |
| mmu-mir-19a   | 3   | 612   | 2 | 8616  | 1  |
| mmu-mir-423   | 3   | 1493  | 0 | 7633  | 2  |
| mmu-mir-183   | 0   | 3694  | 0 | 5340  | 2  |

|                |     |      |     |      |    |
|----------------|-----|------|-----|------|----|
| mmu-mir-148b   | 1   | 3455 | 8   | 5524 | 1  |
| mmu-mir-133a-2 | 4   | 7174 | 0   | 1808 | 1  |
| mmu-mir-133a-1 | 1   | 7174 | 2   | 1808 | 2  |
| mmu-mir-351    | 6   | 8872 | 8   | 53   | 1  |
| mmu-mir-1927   | 0   | 43   | 0   | 8746 | 3  |
| mmu-mir-761    | 0   | 8700 | 0   | 29   | 9  |
| mmu-mir-721    | 3   | 1537 | 2   | 7096 | 5  |
| mmu-mir-148a   | 2   | 2197 | 0   | 6383 | 2  |
| mmu-mir-489    | 0   | 12   | 0   | 8495 | 0  |
| mmu-mir-299    | 1   | 6415 | 0   | 1954 | 7  |
| mmu-mir-152    | 2   | 340  | 2   | 7993 | 16 |
| mmu-mir-3072   | 1   | 25   | 2   | 8290 | 7  |
| mmu-mir-375    | 12  | 7    | 0   | 8261 | 2  |
| mmu-mir-503    | 257 | 6824 | 4   | 1183 | 1  |
| mmu-mir-1274a  | 1   | 8068 | 0   | 5    | 0  |
| mmu-mir-196b   | 4   | 182  | 1   | 7665 | 0  |
| mmu-mir-802    | 1   | 7809 | 3   | 9    | 0  |
| mmu-mir-200b   | 0   | 1557 | 3   | 6186 | 0  |
| mmu-mir-301b   | 3   | 22   | 3   | 7605 | 5  |
| mmu-mir-488    | 7   | 7110 | 3   | 483  | 3  |
| mmu-mir-193    | 3   | 733  | 0   | 6836 | 5  |
| mmu-mir-743b   | 3   | 2904 | 1   | 4566 | 0  |
| mmu-mir-28     | 1   | 3442 | 6   | 3564 | 0  |
| mmu-mir-106a   | 0   | 6847 | 7   | 73   | 5  |
| mmu-mir-1899   | 0   | 6915 | 0   | 9    | 0  |
| mmu-mir-344b   | 6   | 11   | 1   | 6882 | 0  |
| mmu-mir-182    | 3   | 6410 | 5   | 417  | 17 |
| mmu-mir-214    | 3   | 642  | 0   | 5945 | 6  |
| mmu-mir-412    | 9   | 1703 | 0   | 4879 | 4  |
| mmu-mir-144    | 9   | 5154 | 11  | 1347 | 5  |
| mmu-mir-720    | 5   | 1    | 0   | 6163 | 1  |
| mmu-mir-760    | 1   | 493  | 0   | 5533 | 55 |
| mmu-mir-142    | 5   | 5052 | 2   | 744  | 3  |
| mmu-mir-742    | 0   | 501  | 161 | 5129 | 0  |
| mmu-mir-199a-1 | 1   | 5672 | 0   | 43   | 0  |
| mmu-mir-592    | 3   | 5388 | 1   | 314  | 3  |
| mmu-mir-199a-2 | 8   | 5670 | 3   | 19   | 1  |
| mmu-mir-1946a  | 4   | 5533 | 0   | 107  | 13 |
| mmu-mir-878    | 2   | 342  | 1   | 5272 | 1  |
| mmu-mir-452    | 0   | 3125 | 0   | 2442 | 1  |
| mmu-mir-429    | 5   | 2    | 0   | 5522 | 0  |

|                |    |      |      |      |    |
|----------------|----|------|------|------|----|
| mmu-mir-3085   | 2  | 172  | 5    | 5318 | 1  |
| mmu-mir-1191   | 4  | 9    | 0    | 5476 | 3  |
| mmu-mir-539    | 1  | 5436 | 1    | 16   | 3  |
| mmu-mir-615    | 12 | 93   | 2    | 5304 | 17 |
| mmu-mir-377    | 67 | 3197 | 0    | 2155 | 6  |
| mmu-mir-483    | 12 | 2996 | 5    | 2355 | 5  |
| mmu-mir-302d   | 3  | 2565 | 0    | 2765 | 0  |
| mmu-mir-1983   | 2  | 318  | 0    | 4826 | 53 |
| mmu-mir-1198   | 2  | 5123 | 1    | 54   | 9  |
| mmu-mir-653    | 1  | 5117 | 3    | 4    | 2  |
| mmu-mir-1224   | 1  | 2780 | 0    | 2318 | 3  |
| mmu-mir-10b    | 1  | 4063 | 0    | 1038 | 0  |
| mmu-mir-122    | 1  | 2729 | 0    | 2346 | 2  |
| mmu-mir-1933   | 4  | 1387 | 2    | 3566 | 2  |
| mmu-mir-703    | 1  | 4832 | 0    | 13   | 0  |
| mmu-mir-490    | 2  | 1159 | 4    | 3652 | 4  |
| mmu-mir-467e   | 0  | 4748 | 0    | 22   | 7  |
| mmu-mir-293    | 4  | 2094 | 0    | 2630 | 2  |
| mmu-mir-302a   | 3  | 4178 | 0    | 528  | 1  |
| mmu-mir-669h   | 1  | 4375 | 0    | 179  | 67 |
| mmu-mir-3099   | 23 | 189  | 1    | 4396 | 5  |
| mmu-mir-511    | 3  | 4399 | 0    | 142  | 7  |
| mmu-mir-188    | 23 | 3538 | 10   | 966  | 3  |
| mmu-mir-217    | 0  | 4383 | 0    | 110  | 7  |
| mmu-mir-202    | 5  | 3188 | 4    | 1242 | 8  |
| mmu-mir-215    | 0  | 4419 | 0    | 5    | 6  |
| mmu-mir-294    | 3  | 3554 | 0    | 831  | 2  |
| mmu-mir-343    | 4  | 1    | 0    | 4374 | 3  |
| mmu-mir-290    | 0  | 3316 | 0    | 1037 | 3  |
| mmu-mir-291b   | 1  | 3093 | 0    | 1252 | 9  |
| mmu-mir-18b    | 16 | 1005 | 2442 | 795  | 0  |
| mmu-mir-449c   | 2  | 4202 | 0    | 11   | 1  |
| mmu-mir-200c   | 4  | 1236 | 2    | 2879 | 3  |
| mmu-mir-302c   | 5  | 3288 | 2    | 802  | 3  |
| mmu-mir-196a-2 | 0  | 2595 | 3    | 1461 | 4  |
| mmu-mir-1981   | 2  | 2980 | 0    | 1004 | 3  |
| mmu-mir-327    | 1  | 3846 | 0    | 4    | 2  |
| mmu-mir-695    | 2  | 3764 | 0    | 4    | 0  |
| mmu-mir-883b   | 4  | 2553 | 1    | 1113 | 0  |
| mmu-mir-1192   | 8  | 3633 | 0    | 19   | 8  |
| mmu-mir-1950   | 2  | 3567 | 0    | 6    | 5  |

|                |    |      |   |      |    |
|----------------|----|------|---|------|----|
| mmu-mir-468    | 7  | 2    | 0 | 3522 | 8  |
| mmu-mir-540    | 2  | 600  | 0 | 2928 | 2  |
| mmu-mir-758    | 2  | 21   | 1 | 3351 | 1  |
| mmu-mir-690    | 0  | 5    | 0 | 3306 | 2  |
| mmu-mir-504    | 5  | 3110 | 2 | 160  | 1  |
| mmu-mir-1965   | 10 | 32   | 0 | 3198 | 33 |
| mmu-mir-491    | 2  | 1288 | 0 | 1942 | 1  |
| mmu-mir-682    | 3  | 1    | 0 | 3214 | 4  |
| mmu-mir-767    | 2  | 3050 | 0 | 141  | 11 |
| mmu-mir-687    | 4  | 3135 | 0 | 6    | 4  |
| mmu-mir-449a   | 4  | 3055 | 0 | 36   | 0  |
| mmu-mir-1956   | 3  | 3085 | 0 | 5    | 0  |
| mmu-mir-1193   | 0  | 19   | 0 | 3062 | 3  |
| mmu-mir-704    | 4  | 5    | 5 | 2989 | 1  |
| mmu-mir-298    | 3  | 2906 | 0 | 76   | 1  |
| mmu-mir-96     | 4  | 441  | 2 | 2476 | 0  |
| mmu-mir-509    | 5  | 1346 | 1 | 1517 | 1  |
| mmu-mir-707    | 0  | 2837 | 0 | 2    | 2  |
| mmu-mir-1931   | 0  | 4    | 0 | 2830 | 6  |
| mmu-mir-883a   | 1  | 293  | 0 | 2539 | 0  |
| mmu-mir-697    | 2  | 9    | 2 | 2810 | 0  |
| mmu-mir-464    | 0  | 3    | 0 | 2803 | 0  |
| mmu-mir-205    | 5  | 2370 | 1 | 413  | 0  |
| mmu-mir-449b   | 0  | 1809 | 3 | 968  | 0  |
| mmu-mir-1955   | 0  | 2701 | 0 | 50   | 0  |
| mmu-mir-677    | 2  | 2693 | 0 | 56   | 0  |
| mmu-mir-669g   | 4  | 2582 | 0 | 124  | 2  |
| mmu-mir-1247   | 7  | 2664 | 3 | 9    | 2  |
| mmu-mir-196a-1 | 3  | 2648 | 0 | 14   | 0  |
| mmu-mir-302b   | 3  | 1055 | 4 | 1595 | 3  |
| mmu-mir-141    | 0  | 1390 | 2 | 1247 | 2  |
| mmu-mir-450a-1 | 6  | 2353 | 1 | 91   | 2  |
| mmu-mir-673    | 4  | 1874 | 6 | 521  | 8  |
| mmu-mir-741    | 4  | 1    | 1 | 2397 | 6  |
| mmu-mir-450a-2 | 0  | 2354 | 0 | 11   | 1  |
| mmu-mir-295    | 3  | 1660 | 2 | 683  | 10 |
| mmu-mir-105    | 6  | 1556 | 0 | 793  | 0  |
| mmu-mir-1963   | 2  | 2337 | 0 | 5    | 0  |
| mmu-mir-147    | 1  | 74   | 3 | 2243 | 14 |
| mmu-mir-701    | 1  | 2313 | 0 | 10   | 3  |
| mmu-mir-759    | 0  | 2230 | 0 | 69   | 1  |

|                 |     |      |   |      |    |
|-----------------|-----|------|---|------|----|
| mmu-mir-292     | 1   | 617  | 4 | 1668 | 5  |
| mmu-mir-2145-2  | 149 | 2071 | 0 | 11   | 9  |
| mmu-mir-466g    | 4   | 5    | 1 | 2194 | 32 |
| mmu-mir-710     | 1   | 2216 | 0 | 7    | 6  |
| mmu-mir-654     | 2   | 1698 | 0 | 528  | 0  |
| mmu-mir-675     | 4   | 636  | 0 | 1548 | 0  |
| mmu-mir-1897    | 1   | 101  | 1 | 2043 | 2  |
| mmu-mir-881     | 2   | 1026 | 1 | 1066 | 2  |
| mmu-mir-1982    | 1   | 37   | 3 | 2045 | 0  |
| mmu-mir-698     | 7   | 7    | 0 | 2067 | 5  |
| mmu-mir-1937b-1 | 1   | 2022 | 0 | 35   | 5  |
| mmu-mir-206     | 6   | 3    | 1 | 2041 | 2  |
| mmu-mir-2145-1  | 3   | 36   | 1 | 2007 | 1  |
| mmu-mir-32      | 4   | 940  | 1 | 1094 | 3  |
| mmu-mir-876     | 1   | 1520 | 3 | 510  | 5  |
| mmu-mir-678     | 2   | 10   | 0 | 2019 | 4  |
| mmu-mir-1937b-3 | 1   | 2006 | 0 | 4    | 0  |
| mmu-mir-684-1   | 0   | 2    | 2 | 1999 | 5  |
| mmu-mir-684-2   | 0   | 2    | 0 | 1993 | 3  |
| mmu-mir-1949    | 3   | 2    | 1 | 1946 | 8  |
| mmu-mir-207     | 4   | 8    | 2 | 1923 | 7  |
| mmu-mir-3106    | 5   | 1783 | 3 | 140  | 9  |
| mmu-mir-1195    | 2   | 1807 | 0 | 96   | 18 |
| mmu-mir-1954    | 9   | 1811 | 1 | 72   | 18 |
| mmu-mir-450b    | 1   | 1286 | 2 | 587  | 2  |
| mmu-mir-1306    | 1   | 1839 | 0 | 20   | 2  |
| mmu-mir-10a     | 4   | 1635 | 6 | 181  | 2  |
| mmu-mir-719     | 2   | 1685 | 0 | 115  | 8  |
| mmu-mir-713     | 0   | 11   | 0 | 1797 | 1  |
| mmu-mir-1903    | 184 | 1460 | 0 | 90   | 49 |
| mmu-mir-493     | 0   | 1695 | 1 | 78   | 0  |
| mmu-mir-879     | 4   | 314  | 0 | 1404 | 0  |
| mmu-mir-1957    | 6   | 1688 | 0 | 24   | 3  |
| mmu-mir-133b    | 3   | 9    | 0 | 1705 | 2  |
| mmu-mir-669e    | 1   | 1643 | 0 | 70   | 0  |
| mmu-mir-453     | 1   | 4    | 2 | 1702 | 1  |
| mmu-mir-1941    | 3   | 258  | 0 | 1378 | 1  |
| mmu-mir-875     | 3   | 218  | 0 | 1380 | 0  |
| mmu-mir-344c    | 8   | 9    | 2 | 1530 | 7  |
| mmu-mir-692-1   | 1   | 3    | 1 | 1533 | 2  |
| mmu-mir-692-2   | 1   | 3    | 0 | 1533 | 3  |

|                |     |      |    |      |   |
|----------------|-----|------|----|------|---|
| mmu-mir-1958   | 0   | 4    | 0  | 1488 | 2 |
| mmu-mir-1944   | 1   | 727  | 0  | 751  | 1 |
| mmu-mir-499    | 0   | 877  | 0  | 597  | 2 |
| mmu-mir-882    | 9   | 1451 | 2  | 10   | 1 |
| mmu-mir-693    | 0   | 1074 | 0  | 384  | 1 |
| mmu-mir-1896   | 4   | 2    | 0  | 1442 | 1 |
| mmu-mir-1197   | 5   | 5    | 0  | 1429 | 1 |
| mmu-mir-1939   | 3   | 1427 | 0  | 4    | 2 |
| mmu-mir-194-1  | 5   | 1414 | 0  | 10   | 4 |
| mmu-mir-679    | 4   | 1428 | 0  | 1    | 0 |
| mmu-mir-471    | 1   | 1405 | 2  | 17   | 2 |
| mmu-mir-486    | 4   | 262  | 2  | 1154 | 4 |
| mmu-mir-1968   | 0   | 1380 | 1  | 15   | 4 |
| mmu-mir-1902   | 0   | 2    | 0  | 1386 | 2 |
| mmu-mir-1907   | 17  | 27   | 0  | 1338 | 2 |
| mmu-mir-3475   | 8   | 24   | 0  | 1335 | 2 |
| mmu-mir-291a   | 1   | 1098 | 3  | 247  | 0 |
| mmu-mir-194-2  | 20  | 1271 | 3  | 52   | 0 |
| mmu-mir-3083   | 2   | 314  | 0  | 1009 | 0 |
| mmu-mir-3107   | 3   | 969  | 7  | 340  | 6 |
| mmu-mir-686    | 0   | 1317 | 0  | 2    | 0 |
| mmu-mir-763    | 1   | 1289 | 0  | 7    | 2 |
| mmu-mir-669c   | 0   | 1272 | 1  | 21   | 4 |
| mmu-mir-1970   | 3   | 1287 | 0  | 5    | 3 |
| mmu-mir-470    | 4   | 515  | 0  | 765  | 3 |
| mmu-mir-1894   | 7   | 186  | 12 | 1078 | 1 |
| mmu-mir-683-1  | 3   | 3    | 0  | 1259 | 1 |
| mmu-mir-683-2  | 3   | 3    | 0  | 1259 | 1 |
| mmu-mir-3060   | 4   | 10   | 0  | 1245 | 4 |
| mmu-mir-297b   | 2   | 1255 | 0  | 2    | 0 |
| mmu-mir-1188   | 2   | 910  | 4  | 271  | 2 |
| mmu-mir-216b   | 0   | 1145 | 0  | 14   | 3 |
| mmu-mir-1186   | 94  | 1035 | 0  | 25   | 3 |
| mmu-mir-1190   | 1   | 4    | 0  | 1110 | 0 |
| mmu-mir-465b-1 | 0   | 1039 | 0  | 5    | 0 |
| mmu-mir-465b-2 | 0   | 1039 | 0  | 5    | 0 |
| mmu-mir-1960   | 4   | 995  | 0  | 12   | 2 |
| mmu-mir-1905   | 194 | 2    | 0  | 813  | 0 |
| mmu-mir-694    | 0   | 20   | 0  | 931  | 7 |
| mmu-mir-1-2-as | 3   | 894  | 0  | 41   | 0 |
| mmu-mir-1969   | 4   | 905  | 0  | 12   | 8 |

|                |     |     |   |     |    |
|----------------|-----|-----|---|-----|----|
| mmu-mir-1932   | 2   | 5   | 0 | 911 | 10 |
| mmu-mir-1929   | 0   | 902 | 0 | 20  | 2  |
| mmu-mir-1940   | 7   | 908 | 0 | 4   | 3  |
| mmu-mir-681    | 6   | 887 | 0 | 17  | 5  |
| mmu-mir-190b   | 2   | 881 | 0 | 25  | 1  |
| mmu-mir-1937c  | 2   | 6   | 4 | 866 | 5  |
| mmu-mir-1959   | 4   | 862 | 0 | 12  | 0  |
| mmu-mir-155    | 0   | 853 | 0 | 6   | 0  |
| mmu-mir-3059   | 5   | 743 | 0 | 100 | 0  |
| mmu-mir-547    | 5   | 3   | 0 | 829 | 7  |
| mmu-mir-184    | 3   | 5   | 2 | 813 | 1  |
| mmu-mir-432    | 3   | 2   | 0 | 816 | 0  |
| mmu-mir-688    | 19  | 6   | 0 | 777 | 6  |
| mmu-mir-669m-2 | 2   | 5   | 0 | 798 | 0  |
| mmu-mir-669m-1 | 0   | 5   | 1 | 797 | 0  |
| mmu-mir-1900   | 2   | 2   | 0 | 729 | 7  |
| mmu-mir-3078   | 37  | 650 | 3 | 46  | 2  |
| mmu-mir-1951   | 4   | 10  | 0 | 688 | 11 |
| mmu-mir-880    | 3   | 2   | 0 | 688 | 2  |
| mmu-mir-1930   | 3   | 512 | 0 | 166 | 3  |
| mmu-mir-1971   | 1   | 564 | 0 | 100 | 2  |
| mmu-mir-1948   | 1   | 12  | 0 | 642 | 0  |
| mmu-mir-709    | 0   | 10  | 0 | 628 | 2  |
| mmu-mir-465c-2 | 0   | 620 | 0 | 3   | 0  |
| mmu-mir-465c-1 | 0   | 620 | 0 | 3   | 0  |
| mmu-mir-1935   | 356 | 6   | 1 | 226 | 29 |
| mmu-mir-1947   | 3   | 532 | 0 | 45  | 3  |
| mmu-mir-1901   | 1   | 14  | 0 | 561 | 1  |
| mmu-mir-466f-3 | 27  | 200 | 0 | 302 | 43 |
| mmu-mir-1962   | 1   | 7   | 2 | 549 | 3  |
| mmu-mir-1967   | 0   | 11  | 0 | 550 | 1  |
| mmu-mir-466f-2 | 2   | 200 | 0 | 338 | 19 |
| mmu-mir-871    | 9   | 544 | 0 | 5   | 0  |
| mmu-mir-3061   | 0   | 210 | 0 | 336 | 1  |
| mmu-mir-1895   | 4   | 10  | 1 | 525 | 3  |
| mmu-mir-1938   | 3   | 527 | 0 | 8   | 2  |
| mmu-mir-1946b  | 3   | 118 | 0 | 400 | 14 |
| mmu-mir-1961   | 0   | 42  | 0 | 491 | 1  |
| mmu-mir-466c-2 | 5   | 502 | 0 | 9   | 1  |
| mmu-mir-466c-1 | 0   | 502 | 0 | 9   | 0  |
| mmu-mir-201    | 4   | 480 | 0 | 15  | 2  |



|                |     |     |    |     |    |
|----------------|-----|-----|----|-----|----|
| mmu-mir-3057   | 0   | 126 | 0  | 366 | 2  |
| mmu-mir-1912   | 0   | 141 | 35 | 312 | 3  |
| mmu-mir-1196   | 6   | 388 | 0  | 86  | 2  |
| mmu-mir-466f-1 | 28  | 200 | 0  | 248 | 5  |
| mmu-mir-3473   | 4   | 300 | 0  | 166 | 8  |
| mmu-mir-1934   | 2   | 377 | 0  | 71  | 0  |
| mmu-mir-706    | 32  | 408 | 0  | 5   | 2  |
| mmu-mir-1964   | 2   | 139 | 3  | 293 | 5  |
| mmu-mir-691    | 4   | 13  | 0  | 418 | 2  |
| mmu-mir-715    | 18  | 339 | 0  | 60  | 8  |
| mmu-mir-297a-1 | 1   | 400 | 0  | 17  | 0  |
| mmu-mir-1953   | 9   | 388 | 0  | 14  | 3  |
| mmu-mir-3105   | 0   | 284 | 1  | 117 | 6  |
| mmu-mir-297a-5 | 0   | 188 | 1  | 202 | 8  |
| mmu-mir-1966   | 0   | 369 | 0  | 12  | 2  |
| mmu-mir-3069   | 2   | 42  | 2  | 324 | 1  |
| mmu-mir-367    | 0   | 26  | 0  | 344 | 0  |
| mmu-mir-1187   | 2   | 297 | 2  | 61  | 1  |
| mmu-mir-599    | 3   | 3   | 0  | 350 | 7  |
| mmu-mir-344f   | 9   | 97  | 0  | 254 | 2  |
| mmu-mir-208b   | 5   | 15  | 0  | 329 | 4  |
| mmu-mir-3470b  | 25  | 125 | 11 | 176 | 13 |
| mmu-mir-1892   | 1   | 3   | 0  | 339 | 3  |
| mmu-mir-1928   | 1   | 2   | 8  | 333 | 2  |
| mmu-mir-3093   | 1   | 169 | 7  | 169 | 0  |
| mmu-mir-3076   | 1   | 96  | 0  | 243 | 0  |
| mmu-mir-3064   | 12  | 32  | 1  | 283 | 7  |
| mmu-mir-3097   | 2   | 95  | 3  | 219 | 12 |
| mmu-mir-669d-2 | 39  | 263 | 1  | 23  | 2  |
| mmu-mir-669n   | 0   | 323 | 0  | 2   | 1  |
| mmu-mir-3087   | 1   | 83  | 0  | 239 | 2  |
| mmu-mir-680-3  | 22  | 278 | 0  | 7   | 13 |
| mmu-mir-705    | 8   | 248 | 0  | 54  | 8  |
| mmu-mir-1898   | 1   | 303 | 2  | 8   | 1  |
| mmu-mir-3086   | 5   | 71  | 0  | 227 | 2  |
| mmu-mir-568    | 5   | 285 | 0  | 12  | 1  |
| mmu-mir-762    | 5   | 7   | 1  | 288 | 1  |
| mmu-mir-2136   | 1   | 4   | 0  | 289 | 1  |
| mmu-mir-669d   | 5   | 260 | 0  | 23  | 5  |
| mmu-mir-467h   | 127 | 43  | 0  | 121 | 0  |
| mmu-mir-711    | 6   | 6   | 0  | 257 | 1  |

|                |    |     |    |     |    |
|----------------|----|-----|----|-----|----|
| mmu-mir-1945   | 2  | 5   | 0  | 239 | 2  |
| mmu-mir-466b-3 | 0  | 0   | 1  | 241 | 0  |
| mmu-mir-467c   | 4  | 225 | 0  | 7   | 1  |
| mmu-mir-804    | 3  | 23  | 0  | 207 | 2  |
| mmu-mir-2139   | 10 | 7   | 0  | 214 | 0  |
| mmu-mir-3062   | 3  | 191 | 19 | 15  | 2  |
| mmu-mir-466f-4 | 7  | 198 | 0  | 20  | 5  |
| mmu-mir-216a   | 2  | 180 | 2  | 36  | 5  |
| mmu-mir-1251   | 0  | 172 | 2  | 47  | 1  |
| mmu-mir-2137   | 30 | 4   | 1  | 173 | 1  |
| mmu-mir-297a-3 | 0  | 188 | 0  | 11  | 0  |
| mmu-mir-466l   | 0  | 4   | 1  | 189 | 5  |
| mmu-mir-3074-1 | 4  | 26  | 9  | 158 | 1  |
| mmu-mir-297a-2 | 1  | 1   | 3  | 182 | 11 |
| mmu-mir-344e   | 15 | 7   | 2  | 169 | 1  |
| mmu-mir-297a-4 | 0  | 188 | 0  | 5   | 0  |
| mmu-mir-1943   | 5  | 41  | 2  | 137 | 8  |
| mmu-mir-297a-6 | 4  | 6   | 0  | 183 | 0  |
| mmu-mir-3082   | 0  | 161 | 0  | 25  | 3  |
| mmu-mir-3470a  | 13 | 67  | 3  | 87  | 15 |
| mmu-mir-466d   | 0  | 0   | 0  | 171 | 12 |
| mmu-mir-669j   | 1  | 6   | 0  | 171 | 2  |
| mmu-mir-466m   | 9  | 15  | 0  | 123 | 33 |
| mmu-mir-467f   | 1  | 8   | 1  | 165 | 3  |
| mmu-mir-3104   | 0  | 8   | 2  | 159 | 2  |
| mmu-mir-1906-1 | 4  | 3   | 0  | 157 | 0  |
| mmu-mir-466h   | 1  | 141 | 0  | 14  | 8  |
| mmu-mir-297c   | 0  | 144 | 0  | 5   | 0  |
| mmu-mir-3084   | 0  | 0   | 0  | 142 | 1  |
| mmu-mir-467d   | 0  | 143 | 0  | 0   | 0  |
| mmu-mir-3070b  | 0  | 5   | 0  | 131 | 0  |
| mmu-mir-465a   | 1  | 131 | 0  | 4   | 0  |
| mmu-mir-3058   | 1  | 100 | 1  | 32  | 2  |
| mmu-mir-1906-2 | 4  | 3   | 0  | 119 | 9  |
| mmu-mir-3101   | 1  | 113 | 0  | 14  | 4  |
| mmu-mir-1952   | 2  | 120 | 0  | 5   | 1  |
| mmu-mir-1936   | 1  | 12  | 0  | 111 | 3  |
| mmu-mir-3472   | 6  | 2   | 0  | 100 | 4  |
| mmu-mir-669f   | 2  | 39  | 0  | 57  | 14 |
| mmu-mir-467b   | 0  | 0   | 0  | 111 | 0  |
| mmu-mir-717    | 6  | 100 | 0  | 3   | 1  |

|                 |    |    |   |    |   |
|-----------------|----|----|---|----|---|
| mmu-mir-3091    | 0  | 35 | 0 | 67 | 0 |
| mmu-mir-3095    | 4  | 31 | 2 | 62 | 1 |
| mmu-mir-3103    | 2  | 1  | 1 | 94 | 1 |
| mmu-mir-344g    | 2  | 35 | 0 | 61 | 0 |
| mmu-mir-669l    | 2  | 84 | 0 | 6  | 3 |
| mmu-mir-3077    | 2  | 2  | 0 | 90 | 0 |
| mmu-mir-466i    | 0  | 9  | 1 | 77 | 5 |
| mmu-mir-669i    | 2  | 2  | 0 | 85 | 3 |
| mmu-mir-3090    | 2  | 4  | 0 | 78 | 3 |
| mmu-mir-3471-2  | 13 | 41 | 0 | 22 | 0 |
| mmu-mir-1186b   | 49 | 21 | 0 | 5  | 0 |
| mmu-mir-466j    | 4  | 25 | 0 | 42 | 2 |
| mmu-mir-3094    | 3  | 26 | 8 | 32 | 2 |
| mmu-mir-3098    | 5  | 28 | 3 | 29 | 3 |
| mmu-mir-467g    | 1  | 12 | 0 | 51 | 3 |
| mmu-mir-466n    | 0  | 0  | 0 | 62 | 4 |
| mmu-mir-374c    | 1  | 26 | 0 | 32 | 6 |
| mmu-mir-3471-1  | 6  | 6  | 0 | 48 | 3 |
| mmu-mir-1937b-2 | 4  | 17 | 6 | 33 | 2 |
| mmu-mir-3067    | 16 | 8  | 0 | 28 | 8 |
| mmu-mir-1904    | 0  | 31 | 0 | 22 | 3 |
| mmu-mir-718     | 5  | 3  | 4 | 38 | 2 |
| mmu-mir-3088    | 4  | 9  | 0 | 35 | 0 |
| mmu-mir-1942    | 3  | 1  | 3 | 35 | 3 |
| mmu-mir-466k    | 5  | 24 | 0 | 7  | 7 |
| mmu-mir-1937a   | 1  | 34 | 0 | 4  | 3 |
| mmu-mir-669b    | 3  | 12 | 0 | 26 | 1 |
| mmu-mir-1199    | 2  | 34 | 0 | 4  | 1 |
| mmu-mir-3100    | 12 | 4  | 0 | 23 | 0 |
| mmu-mir-680-2   | 9  | 15 | 0 | 10 | 5 |
| mmu-mir-669k    | 0  | 0  | 1 | 31 | 5 |
| mmu-mir-3071    | 1  | 3  | 0 | 31 | 2 |
| mmu-mir-3109    | 4  | 8  | 0 | 22 | 2 |
| mmu-mir-3113    | 4  | 24 | 0 | 8  | 0 |
| mmu-mir-3074-2  | 0  | 26 | 0 | 8  | 2 |
| mmu-mir-3112    | 7  | 7  | 0 | 15 | 4 |
| mmu-mir-3096    | 2  | 5  | 0 | 22 | 4 |
| mmu-mir-1937b-4 | 4  | 17 | 0 | 11 | 0 |
| mmu-mir-669o    | 0  | 7  | 0 | 20 | 2 |
| mmu-mir-3108    | 7  | 14 | 0 | 7  | 0 |
| mmu-mir-3080    | 5  | 18 | 0 | 5  | 0 |

|                 |    |    |   |    |   |
|-----------------|----|----|---|----|---|
| mmu-mir-3066    | 4  | 16 | 0 | 8  | 0 |
| mmu-mir-680-1   | 7  | 15 | 0 | 5  | 0 |
| mmu-mir-208a    | 1  | 9  | 0 | 9  | 7 |
| mmu-mir-3070a   | 0  | 0  | 2 | 23 | 0 |
| mmu-mir-546     | 1  | 9  | 0 | 7  | 7 |
| mmu-mir-3474    | 2  | 17 | 0 | 2  | 1 |
| mmu-mir-3081    | 0  | 1  | 0 | 16 | 5 |
| mmu-mir-3065    | 10 | 5  | 0 | 7  | 0 |
| mmu-mir-3089    | 1  | 2  | 0 | 16 | 2 |
| mmu-mir-1893    | 2  | 3  | 0 | 13 | 1 |
| mmu-mir-3110    | 1  | 11 | 0 | 7  | 0 |
| mmu-mir-3092    | 0  | 5  | 0 | 12 | 0 |
| mmu-mir-1937b-5 | 0  | 4  | 0 | 13 | 0 |
| mmu-mir-2861    | 4  | 7  | 0 | 5  | 0 |
| mmu-mir-669p-1  | 0  | 0  | 0 | 14 | 0 |
| mmu-mir-669p-2  | 0  | 0  | 0 | 14 | 0 |
| mmu-mir-3079    | 2  | 6  | 0 | 6  | 0 |
| mmu-mir-466o    | 0  | 0  | 0 | 9  | 3 |
| mmu-mir-466p    | 0  | 1  | 0 | 8  | 3 |
| mmu-mir-3073    | 0  | 2  | 5 | 5  | 0 |
| mmu-mir-669a-3  | 0  | 0  | 0 | 11 | 0 |
| mmu-mir-3063    | 1  | 2  | 0 | 8  | 0 |
| mmu-mir-3075    | 0  | 1  | 0 | 8  | 2 |
| mmu-mir-669a-2  | 0  | 0  | 0 | 9  | 1 |
| mmu-mir-669a-12 | 0  | 0  | 0 | 7  | 0 |
| mmu-mir-467a-2  | 0  | 2  | 0 | 4  | 0 |
| mmu-mir-467a-9  | 0  | 2  | 0 | 3  | 0 |
| mmu-mir-467a-4  | 0  | 2  | 0 | 3  | 0 |
| mmu-mir-467a-7  | 0  | 2  | 0 | 3  | 0 |
| mmu-mir-466a    | 0  | 0  | 1 | 3  | 0 |
| mmu-mir-467a-1  | 0  | 0  | 0 | 3  | 0 |
| mmu-mir-467a-3  | 0  | 0  | 0 | 2  | 0 |
| mmu-mir-467a-6  | 0  | 0  | 0 | 2  | 0 |
| mmu-mir-467a-5  | 0  | 2  | 0 | 0  | 0 |
| mmu-mir-669a-5  | 0  | 0  | 0 | 2  | 0 |
| mmu-mir-467a-8  | 0  | 2  | 0 | 0  | 0 |
| mmu-mir-467a-10 | 0  | 0  | 0 | 2  | 0 |
| mmu-mir-466b-2  | 0  | 2  | 0 | 0  | 0 |
| mmu-mir-466b-4  | 0  | 0  | 0 | 1  | 0 |
| mmu-mir-669a-1  | 0  | 0  | 0 | 1  | 0 |
| mmu-mir-466b-6  | 0  | 0  | 0 | 1  | 0 |

|                |   |   |   |   |   |
|----------------|---|---|---|---|---|
| mmu-mir-466b-5 | 0 | 0 | 0 | 1 | 0 |
|----------------|---|---|---|---|---|

Supplementary Table S3. Phased reads of 5p/3p, moRs and loops in Reprogramming-total RNA samples.

| miRNAs         | 5moR | 5p      | loop | 3p      | 3moR |
|----------------|------|---------|------|---------|------|
| mmu-mir-125b-2 | 243  | 8179057 | 33   | 3492    | 5    |
| mmu-mir-125b-1 | 140  | 8165305 | 61   | 6670    | 52   |
| mmu-mir-24-2   | 281  | 93108   | 2    | 5260323 | 34   |
| mmu-mir-24-1   | 3098 | 6033    | 34   | 5260328 | 43   |
| mmu-mir-293    | 303  | 99148   | 0    | 4713564 | 11   |
| mmu-mir-21     | 4607 | 4130542 | 3    | 15943   | 317  |
| mmu-mir-125a   | 320  | 3163114 | 4    | 5528    | 33   |
| mmu-mir-290    | 42   | 3035801 | 4    | 23534   | 105  |
| mmu-mir-292    | 752  | 1532176 | 286  | 1507323 | 19   |
| mmu-mir-294    | 1028 | 209814  | 0    | 2644488 | 1247 |
| mmu-mir-29a    | 11   | 6912    | 3    | 2728762 | 4    |
| mmu-mir-23a    | 71   | 7199    | 2    | 2155757 | 30   |
| mmu-mir-23b    | 140  | 7560    | 2    | 2038072 | 5    |
| mmu-mir-214    | 272  | 41808   | 765  | 1970600 | 257  |
| mmu-mir-130b   | 120  | 90927   | 21   | 1920156 | 4    |
| mmu-mir-92a-1  | 0    | 36355   | 8    | 1869388 | 66   |
| mmu-mir-19b-1  | 247  | 14189   | 6    | 1743260 | 0    |
| mmu-mir-145    | 227  | 1732156 | 209  | 7004    | 6    |
| mmu-mir-19b-2  | 96   | 1119    | 2    | 1731861 | 6    |
| mmu-mir-130a   | 44   | 26251   | 41   | 1423919 | 56   |
| mmu-mir-103-2  | 538  | 1630    | 7    | 1403869 | 39   |
| mmu-mir-103-1  | 105  | 840     | 1    | 1400824 | 29   |
| mmu-mir-34a    | 32   | 1139042 | 2927 | 49332   | 20   |
| mmu-mir-182    | 17   | 1069043 | 2285 | 4185    | 35   |
| mmu-mir-17     | 128  | 990028  | 7    | 84766   | 21   |
| mmu-mir-29b-1  | 8    | 16081   | 2    | 855366  | 26   |
| mmu-mir-29b-2  | 5    | 3485    | 9    | 836630  | 6    |
| mmu-mir-191    | 106  | 828027  | 38   | 5538    | 26   |
| mmu-let-7f-2   | 683  | 759321  | 93   | 5427    | 70   |
| mmu-let-7f-1   | 3    | 750896  | 0    | 14202   | 5    |
| mmu-mir-15b    | 856  | 653728  | 5    | 29577   | 21   |
| mmu-mir-301a   | 352  | 12325   | 1    | 666168  | 262  |
| mmu-mir-31     | 7    | 620978  | 0    | 55693   | 9    |
| mmu-mir-199a-2 | 123  | 653888  | 16   | 1849    | 186  |
| mmu-mir-199a-1 | 2    | 654007  | 0    | 16      | 1    |
| mmu-mir-183    | 33   | 619055  | 106  | 32794   | 22   |
| mmu-mir-26a-2  | 30   | 644121  | 11   | 3699    | 4    |
| mmu-mir-26a-1  | 7    | 644132  | 12   | 2213    | 4    |

|                |      |        |      |        |     |
|----------------|------|--------|------|--------|-----|
| mmu-mir-295    | 106  | 239621 | 174  | 376773 | 97  |
| mmu-mir-218-1  | 6    | 613719 | 4    | 906    | 5   |
| mmu-mir-20a    | 373  | 581455 | 0    | 18735  | 218 |
| mmu-mir-205    | 125  | 565810 | 0    | 2480   | 84  |
| mmu-mir-92a-2  | 71   | 3702   | 2    | 553650 | 14  |
| mmu-mir-484    | 12   | 548968 | 0    | 145    | 0   |
| mmu-mir-16-2   | 954  | 536240 | 11   | 7567   | 39  |
| mmu-mir-16-1   | 1464 | 540018 | 350  | 619    | 9   |
| mmu-mir-140    | 260  | 22216  | 91   | 514430 | 5   |
| mmu-mir-291a   | 229  | 448224 | 0    | 86904  | 639 |
| mmu-let-7g     | 5    | 503628 | 10   | 2298   | 44  |
| mmu-mir-221    | 126  | 6877   | 67   | 440235 | 1   |
| mmu-mir-18a    | 368  | 420221 | 41   | 13742  | 28  |
| mmu-mir-99b    | 101  | 366488 | 5    | 56249  | 5   |
| mmu-mir-210    | 48   | 47174  | 4    | 373858 | 37  |
| mmu-mir-218-2  | 10   | 411940 | 240  | 1130   | 15  |
| mmu-mir-135b   | 85   | 409311 | 30   | 3507   | 35  |
| mmu-mir-19a    | 53   | 978    | 2    | 403329 | 4   |
| mmu-mir-150    | 136  | 402067 | 5    | 1827   | 268 |
| mmu-mir-27a    | 255  | 7726   | 2189 | 382299 | 120 |
| mmu-mir-30c-1  | 354  | 382977 | 0    | 420    | 2   |
| mmu-mir-30c-2  | 105  | 383130 | 6    | 435    | 7   |
| mmu-mir-541    | 4    | 369954 | 11   | 5353   | 9   |
| mmu-mir-302d   | 40   | 14502  | 0    | 358548 | 0   |
| mmu-mir-27b    | 7941 | 25016  | 195  | 339614 | 53  |
| mmu-mir-10a    | 75   | 367123 | 214  | 2748   | 4   |
| mmu-mir-93     | 1190 | 328631 | 9    | 34735  | 176 |
| mmu-mir-92b    | 11   | 27445  | 20   | 332861 | 128 |
| mmu-mir-143    | 78   | 1517   | 0    | 342822 | 37  |
| mmu-mir-25     | 466  | 5562   | 1    | 327152 | 10  |
| mmu-mir-7a-1   | 126  | 283512 | 21   | 35635  | 8   |
| mmu-mir-10b    | 25   | 311597 | 34   | 3192   | 3   |
| mmu-mir-99a    | 3    | 303729 | 2    | 4449   | 9   |
| mmu-mir-106b   | 73   | 255348 | 2359 | 44183  | 519 |
| mmu-mir-30d    | 23   | 289292 | 6    | 1656   | 4   |
| mmu-let-7a-2   | 205  | 276419 | 45   | 2202   | 8   |
| mmu-let-7a-1   | 28   | 277416 | 0    | 41     | 0   |
| mmu-mir-7a-2   | 8    | 275491 | 2    | 522    | 6   |
| mmu-mir-223    | 4    | 2986   | 6    | 256987 | 17  |
| mmu-mir-181a-1 | 17   | 223071 | 6    | 15868  | 9   |
| mmu-mir-342    | 8    | 4092   | 19   | 232530 | 14  |

|                |     |        |     |        |      |
|----------------|-----|--------|-----|--------|------|
| mmu-mir-222    | 102 | 11803  | 11  | 221624 | 22   |
| mmu-mir-181a-2 | 4   | 223074 | 14  | 8164   | 13   |
| mmu-mir-20b    | 160 | 212719 | 3   | 14577  | 2    |
| mmu-mir-151    | 83  | 207038 | 1   | 19665  | 5    |
| mmu-mir-30a    | 35  | 194817 | 1   | 15482  | 6    |
| mmu-mir-574    | 12  | 45337  | 0   | 163974 | 21   |
| mmu-mir-1965   | 2   | 26     | 0   | 207520 | 9    |
| mmu-mir-296    | 482 | 178635 | 0   | 22438  | 120  |
| mmu-mir-30e    | 65  | 164161 | 254 | 22936  | 1034 |
| mmu-let-7b     | 156 | 173487 | 379 | 8294   | 14   |
| mmu-mir-100    | 17  | 179361 | 0   | 1662   | 3    |
| mmu-let-7d     | 185 | 88646  | 8   | 87916  | 11   |
| mmu-mir-328    | 263 | 411    | 264 | 172723 | 20   |
| mmu-let-7c-1   | 6   | 158280 | 682 | 3380   | 4    |
| mmu-mir-434    | 148 | 77618  | 4   | 81245  | 3    |
| mmu-mir-409    | 10  | 12651  | 0   | 146348 | 3    |
| mmu-let-7c-2   | 5   | 158748 | 2   | 19     | 4    |
| mmu-mir-107    | 18  | 614    | 8   | 157940 | 8    |
| mmu-mir-421    | 104 | 3527   | 12  | 150733 | 7    |
| mmu-mir-199b   | 18  | 148156 | 1   | 15     | 2    |
| mmu-mir-337    | 25  | 42014  | 0   | 101861 | 4    |
| mmu-mir-322    | 3   | 131048 | 20  | 10422  | 2    |
| mmu-mir-30b    | 115 | 140011 | 2   | 807    | 6    |
| mmu-mir-361    | 17  | 109148 | 3   | 26166  | 23   |
| mmu-mir-666    | 19  | 5447   | 0   | 128487 | 6    |
| mmu-mir-744    | 42  | 120883 | 12  | 10205  | 16   |
| mmu-mir-674    | 622 | 49937  | 0   | 76965  | 15   |
| mmu-mir-365-1  | 5   | 502    | 0   | 125944 | 2    |
| mmu-mir-365-2  | 14  | 334    | 1   | 125934 | 6    |
| mmu-mir-34c    | 8   | 92538  | 0   | 32024  | 8    |
| mmu-mir-124-1  | 20  | 5968   | 1   | 117132 | 12   |
| mmu-mir-124-2  | 11  | 5968   | 42  | 116948 | 3    |
| mmu-mir-124-3  | 7   | 5965   | 9   | 116948 | 3    |
| mmu-mir-532    | 32  | 107722 | 3   | 12126  | 12   |
| mmu-mir-345    | 377 | 99608  | 22  | 19299  | 31   |
| mmu-mir-29c    | 5   | 7527   | 3   | 111429 | 16   |
| mmu-mir-378    | 15  | 22933  | 4   | 94518  | 21   |
| mmu-mir-26b    | 149 | 107995 | 2   | 6102   | 21   |
| mmu-mir-495    | 28  | 632    | 0   | 112924 | 28   |
| mmu-mir-185    | 25  | 111152 | 0   | 622    | 8    |
| mmu-mir-708    | 53  | 103408 | 944 | 5509   | 11   |



|                |     |       |    |        |     |
|----------------|-----|-------|----|--------|-----|
| mmu-mir-302b   | 108 | 3120  | 8  | 106665 | 8   |
| mmu-mir-423    | 6   | 16970 | 0  | 90019  | 8   |
| mmu-mir-379    | 118 | 96020 | 34 | 10448  | 12  |
| mmu-mir-302a   | 76  | 36672 | 0  | 69842  | 19  |
| mmu-mir-96     | 214 | 95588 | 3  | 8957   | 56  |
| mmu-mir-298    | 13  | 99519 | 0  | 3380   | 11  |
| mmu-mir-22     | 14  | 41454 | 3  | 61108  | 2   |
| mmu-mir-34b    | 682 | 23166 | 2  | 77349  | 7   |
| mmu-mir-1983   | 1   | 6877  | 0  | 92648  | 21  |
| mmu-mir-106a   | 14  | 96662 | 0  | 2382   | 8   |
| mmu-mir-425    | 3   | 74315 | 0  | 20311  | 2   |
| mmu-mir-181b-2 | 14  | 92363 | 1  | 1481   | 11  |
| mmu-mir-382    | 9   | 68801 | 7  | 22789  | 38  |
| mmu-mir-128-2  | 11  | 104   | 3  | 90180  | 7   |
| mmu-let-7i     | 116 | 80767 | 80 | 8804   | 75  |
| mmu-mir-129-2  | 7   | 17702 | 35 | 71229  | 2   |
| mmu-mir-181b-1 | 6   | 84058 | 1  | 2595   | 1   |
| mmu-mir-193b   | 5   | 3360  | 19 | 82312  | 551 |
| mmu-mir-134    | 39  | 82820 | 31 | 2929   | 3   |
| mmu-mir-181c   | 8   | 65579 | 10 | 19916  | 44  |
| mmu-mir-101a   | 47  | 1997  | 1  | 83241  | 4   |
| mmu-mir-128-1  | 14  | 947   | 0  | 83293  | 12  |
| mmu-mir-127    | 148 | 9009  | 0  | 73054  | 8   |
| mmu-mir-291b   | 67  | 44757 | 0  | 36111  | 13  |
| mmu-mir-301b   | 8   | 3589  | 4  | 76534  | 25  |
| mmu-mir-667    | 20  | 3422  | 4  | 74268  | 6   |
| mmu-mir-3102   | 90  | 5661  | 0  | 70431  | 7   |
| mmu-mir-1274a  | 1   | 74648 | 0  | 21     | 0   |
| mmu-mir-138-1  | 19  | 67764 | 4  | 6491   | 14  |
| mmu-mir-351    | 31  | 73664 | 6  | 268    | 27  |
| mmu-mir-652    | 243 | 7747  | 0  | 62074  | 142 |
| mmu-mir-877    | 10  | 9362  | 0  | 60568  | 1   |
| mmu-mir-374    | 24  | 60922 | 0  | 8795   | 5   |
| mmu-mir-149    | 2   | 69081 | 16 | 231    | 3   |
| mmu-mir-186    | 6   | 55624 | 23 | 13559  | 2   |
| mmu-mir-329    | 2   | 6224  | 37 | 61623  | 0   |
| mmu-mir-148a   | 3   | 1118  | 3  | 66511  | 4   |
| mmu-mir-196a-1 | 33  | 62578 | 6  | 4670   | 16  |
| mmu-mir-152    | 8   | 6807  | 1  | 59086  | 79  |
| mmu-mir-411    | 52  | 31433 | 2  | 33194  | 16  |
| mmu-mir-138-2  | 64  | 61691 | 46 | 2416   | 4   |

|                |     |       |     |       |     |
|----------------|-----|-------|-----|-------|-----|
| mmu-mir-543    | 124 | 2644  | 0   | 59617 | 1   |
| mmu-mir-331    | 187 | 827   | 3   | 61285 | 82  |
| mmu-mir-200a   | 11  | 2014  | 3   | 60253 | 16  |
| mmu-mir-15a    | 25  | 54587 | 6   | 6792  | 6   |
| mmu-mir-196a-2 | 14  | 59845 | 2   | 635   | 3   |
| mmu-mir-136    | 160 | 42393 | 1   | 17258 | 6   |
| mmu-mir-494    | 167 | 603   | 0   | 57858 | 3   |
| mmu-mir-721    | 4   | 1589  | 3   | 54931 | 6   |
| mmu-mir-126    | 23  | 20914 | 11  | 34799 | 31  |
| mmu-mir-320    | 5   | 402   | 0   | 55241 | 17  |
| mmu-mir-192    | 13  | 51910 | 26  | 3050  | 17  |
| mmu-mir-872    | 41  | 13465 | 118 | 41036 | 44  |
| mmu-mir-98     | 268 | 46012 | 1   | 7484  | 1   |
| mmu-mir-702    | 3   | 848   | 0   | 52692 | 9   |
| mmu-mir-142    | 66  | 41019 | 17  | 10912 | 12  |
| mmu-mir-154    | 54  | 14791 | 1   | 36901 | 1   |
| mmu-mir-187    | 3   | 5221  | 1   | 45027 | 5   |
| mmu-mir-487b   | 13  | 66    | 0   | 45010 | 3   |
| mmu-mir-376c   | 3   | 566   | 0   | 44336 | 1   |
| mmu-mir-339    | 18  | 42066 | 0   | 1900  | 2   |
| mmu-mir-299    | 6   | 36364 | 0   | 6878  | 8   |
| mmu-mir-324    | 347 | 32542 | 5   | 10008 | 70  |
| mmu-mir-350    | 4   | 37    | 3   | 42400 | 19  |
| mmu-let-7e     | 168 | 35455 | 617 | 5722  | 10  |
| mmu-mir-376b   | 24  | 11132 | 1   | 30595 | 2   |
| mmu-mir-615    | 138 | 689   | 11  | 40784 | 31  |
| mmu-mir-1839   | 6   | 18169 | 5   | 23185 | 7   |
| mmu-mir-363    | 7   | 1926  | 32  | 39076 | 24  |
| mmu-mir-323    | 106 | 341   | 0   | 39787 | 2   |
| mmu-mir-181d   | 14  | 38139 | 15  | 1299  | 36  |
| mmu-mir-369    | 115 | 27184 | 1   | 12072 | 10  |
| mmu-mir-101b   | 103 | 399   | 2   | 38155 | 15  |
| mmu-mir-720    | 17  | 14    | 0   | 35956 | 5   |
| mmu-mir-335    | 7   | 17467 | 5   | 18389 | 4   |
| mmu-mir-200b   | 8   | 10722 | 8   | 23545 | 1   |
| mmu-mir-500    | 121 | 1872  | 7   | 32008 | 32  |
| mmu-mir-370    | 105 | 550   | 0   | 32788 | 194 |
| mmu-mir-340    | 4   | 2194  | 6   | 30550 | 26  |
| mmu-mir-376a   | 4   | 6921  | 2   | 25733 | 3   |
| mmu-mir-485    | 667 | 676   | 4   | 31122 | 74  |
| mmu-mir-302c   | 217 | 13856 | 41  | 17936 | 82  |

|                 |     |       |     |       |     |
|-----------------|-----|-------|-----|-------|-----|
| mmu-mir-1249    | 4   | 282   | 0   | 31228 | 10  |
| mmu-mir-204     | 4   | 31435 | 0   | 62    | 2   |
| mmu-mir-1193    | 16  | 276   | 1   | 30750 | 7   |
| mmu-mir-330     | 10  | 1372  | 2   | 29499 | 26  |
| mmu-mir-672     | 1   | 28252 | 2   | 1726  | 3   |
| mmu-mir-665     | 62  | 102   | 1   | 28404 | 5   |
| mmu-mir-668     | 193 | 68    | 8   | 28046 | 30  |
| mmu-mir-18b     | 131 | 14314 | 17  | 13555 | 17  |
| mmu-mir-676     | 21  | 12707 | 3   | 15101 | 1   |
| mmu-mir-132     | 62  | 8911  | 7   | 18765 | 38  |
| mmu-mir-431     | 15  | 23614 | 113 | 3851  | 176 |
| mmu-mir-9-3     | 10  | 20118 | 0   | 6979  | 1   |
| mmu-mir-326     | 64  | 26    | 1   | 26547 | 2   |
| mmu-mir-1196    | 8   | 25647 | 0   | 434   | 1   |
| mmu-mir-148b    | 10  | 2500  | 1   | 23442 | 5   |
| mmu-mir-362     | 29  | 14334 | 8   | 11388 | 2   |
| mmu-mir-467e    | 23  | 25216 | 0   | 157   | 9   |
| mmu-mir-9-2     | 127 | 20119 | 0   | 4988  | 18  |
| mmu-mir-9-1     | 4   | 20119 | 1   | 4988  | 0   |
| mmu-mir-505     | 13  | 4210  | 0   | 20829 | 1   |
| mmu-mir-429     | 40  | 64    | 5   | 24282 | 7   |
| mmu-mir-195     | 10  | 21979 | 5   | 2133  | 8   |
| mmu-mir-700     | 0   | 6408  | 105 | 16632 | 25  |
| mmu-mir-433     | 86  | 1801  | 0   | 21193 | 22  |
| mmu-mir-139     | 12  | 22604 | 4   | 391   | 4   |
| mmu-mir-129-1   | 20  | 17703 | 3   | 5242  | 4   |
| mmu-mir-146a    | 3   | 21668 | 0   | 260   | 6   |
| mmu-mir-193     | 17  | 8755  | 2   | 12690 | 16  |
| mmu-mir-188     | 52  | 17332 | 71  | 3062  | 5   |
| mmu-mir-300     | 675 | 1728  | 1   | 16941 | 5   |
| mmu-mir-483     | 13  | 5817  | 0   | 13443 | 1   |
| mmu-mir-28      | 10  | 10097 | 40  | 8531  | 9   |
| mmu-mir-501     | 42  | 7616  | 0   | 10768 | 28  |
| mmu-mir-582     | 2   | 8844  | 0   | 9585  | 4   |
| mmu-mir-412     | 155 | 811   | 0   | 16388 | 26  |
| mmu-mir-1191    | 19  | 105   | 0   | 16933 | 4   |
| mmu-mir-122     | 22  | 16066 | 0   | 789   | 1   |
| mmu-mir-551b    | 4   | 214   | 2   | 16223 | 2   |
| mmu-mir-155     | 3   | 16280 | 1   | 112   | 4   |
| mmu-mir-455     | 175 | 1844  | 0   | 13875 | 26  |
| mmu-mir-1937b-1 | 6   | 15511 | 0   | 11    | 1   |

|                 |      |       |    |       |     |
|-----------------|------|-------|----|-------|-----|
| mmu-mir-1937b-3 | 2    | 15437 | 0  | 30    | 0   |
| mmu-mir-664     | 2    | 2368  | 1  | 12694 | 3   |
| mmu-mir-539     | 31   | 14700 | 2  | 55    | 11  |
| mmu-mir-33      | 273  | 6421  | 27 | 7927  | 95  |
| mmu-mir-542     | 15   | 6896  | 0  | 7664  | 19  |
| mmu-mir-503     | 5277 | 6621  | 10 | 2347  | 7   |
| mmu-mir-466g    | 140  | 656   | 2  | 12751 | 103 |
| mmu-mir-380     | 43   | 2651  | 1  | 10607 | 14  |
| mmu-mir-32      | 109  | 8383  | 63 | 4499  | 25  |
| mmu-mir-496     | 46   | 801   | 0  | 12137 | 5   |
| mmu-mir-135a-2  | 7    | 11557 | 3  | 1098  | 0   |
| mmu-mir-707     | 11   | 12266 | 0  | 8     | 0   |
| mmu-mir-1944    | 5    | 3463  | 0  | 8709  | 7   |
| mmu-mir-224     | 3    | 10234 | 1  | 1842  | 26  |
| mmu-mir-135a-1  | 8    | 11548 | 0  | 390   | 4   |
| mmu-mir-764     | 4    | 10414 | 0  | 1439  | 3   |
| mmu-mir-212     | 4    | 3239  | 3  | 8578  | 4   |
| mmu-mir-488     | 21   | 11696 | 0  | 59    | 0   |
| mmu-mir-410     | 1259 | 871   | 0  | 9492  | 3   |
| mmu-mir-344d-2  | 7    | 2269  | 0  | 9260  | 8   |
| mmu-mir-1-2     | 2    | 10499 | 7  | 933   | 1   |
| mmu-mir-341     | 37   | 22    | 5  | 11235 | 4   |
| mmu-mir-671     | 8    | 6750  | 0  | 4377  | 1   |
| mmu-mir-675     | 5    | 5240  | 0  | 5844  | 5   |
| mmu-mir-3473    | 71   | 718   | 0  | 10215 | 10  |
| mmu-mir-497     | 9    | 10369 | 4  | 512   | 6   |
| mmu-mir-381     | 4    | 285   | 20 | 10414 | 8   |
| mmu-mir-669e    | 18   | 8453  | 0  | 1792  | 64  |
| mmu-mir-466f-3  | 10   | 2317  | 2  | 7836  | 106 |
| mmu-mir-1934    | 4    | 3640  | 0  | 6598  | 13  |
| mmu-mir-207     | 5    | 35    | 0  | 10018 | 0   |
| mmu-mir-466f-2  | 6    | 2317  | 2  | 7439  | 87  |
| mmu-mir-297a-5  | 91   | 2496  | 4  | 7157  | 12  |
| mmu-mir-3072    | 39   | 447   | 3  | 9235  | 9   |
| mmu-mir-346     | 7    | 9703  | 0  | 12    | 6   |
| mmu-mir-469     | 5    | 9297  | 0  | 376   | 12  |
| mmu-mir-540     | 18   | 1577  | 0  | 7812  | 3   |
| mmu-mir-344d-3  | 8    | 10    | 0  | 9260  | 8   |
| mmu-mir-344d-1  | 3    | 9     | 1  | 9256  | 4   |
| mmu-mir-1959    | 7    | 9179  | 3  | 26    | 1   |
| mmu-mir-325     | 4    | 6807  | 0  | 1974  | 0   |

|                |     |      |    |      |    |
|----------------|-----|------|----|------|----|
| mmu-mir-344-2  | 29  | 92   | 0  | 8440 | 4  |
| mmu-mir-344-1  | 29  | 89   | 0  | 8440 | 6  |
| mmu-mir-1939   | 7   | 8269 | 0  | 139  | 3  |
| mmu-mir-1927   | 0   | 23   | 0  | 8215 | 8  |
| mmu-mir-3068   | 11  | 2566 | 3  | 5578 | 16 |
| mmu-mir-493    | 16  | 7575 | 4  | 480  | 11 |
| mmu-mir-146b   | 2   | 7264 | 1  | 794  | 5  |
| mmu-mir-1949   | 21  | 6    | 0  | 7992 | 0  |
| mmu-mir-196b   | 40  | 6503 | 0  | 1433 | 9  |
| mmu-mir-1930   | 14  | 7631 | 2  | 108  | 5  |
| mmu-mir-203    | 9   | 1148 | 3  | 6533 | 5  |
| mmu-mir-211    | 6   | 7527 | 7  | 60   | 18 |
| mmu-mir-874    | 2   | 195  | 1  | 7284 | 4  |
| mmu-mir-215    | 2   | 7388 | 0  | 23   | 3  |
| mmu-mir-687    | 9   | 7368 | 0  | 11   | 4  |
| mmu-mir-367    | 19  | 46   | 0  | 7237 | 56 |
| mmu-mir-692-2  | 32  | 51   | 2  | 6959 | 41 |
| mmu-mir-466f-1 | 79  | 2301 | 0  | 4662 | 19 |
| mmu-mir-692-1  | 32  | 51   | 0  | 6943 | 6  |
| mmu-mir-463    | 6   | 6803 | 0  | 206  | 2  |
| mmu-mir-1224   | 1   | 3629 | 0  | 3182 | 4  |
| mmu-mir-504    | 3   | 6206 | 2  | 159  | 32 |
| mmu-mir-761    | 7   | 6309 | 0  | 10   | 5  |
| mmu-mir-1982   | 2   | 167  | 21 | 6063 | 8  |
| mmu-mir-1198   | 4   | 5886 | 19 | 294  | 8  |
| mmu-mir-670    | 5   | 5958 | 5  | 201  | 11 |
| mmu-mir-767    | 3   | 5865 | 2  | 228  | 8  |
| mmu-mir-1956   | 14  | 5997 | 0  | 48   | 1  |
| mmu-mir-669h   | 5   | 5729 | 0  | 178  | 7  |
| mmu-mir-3060   | 8   | 60   | 0  | 5819 | 5  |
| mmu-mir-598    | 358 | 81   | 0  | 5240 | 53 |
| mmu-mir-133a-2 | 25  | 5189 | 1  | 447  | 4  |
| mmu-mir-133a-1 | 0   | 5187 | 3  | 447  | 2  |
| mmu-mir-1981   | 4   | 1755 | 16 | 3827 | 3  |
| mmu-mir-217    | 2   | 5534 | 0  | 39   | 7  |
| mmu-mir-669m-1 | 25  | 39   | 0  | 5471 | 5  |
| mmu-mir-669m-2 | 0   | 39   | 0  | 5475 | 16 |
| mmu-mir-1946a  | 4   | 5415 | 0  | 92   | 8  |
| mmu-mir-190    | 36  | 4122 | 0  | 1059 | 9  |
| mmu-mir-697    | 7   | 24   | 3  | 5127 | 3  |
| mmu-mir-673    | 10  | 4147 | 13 | 947  | 17 |

|                |      |      |     |      |     |
|----------------|------|------|-----|------|-----|
| mmu-mir-1900   | 4    | 7    | 10  | 5086 | 2   |
| mmu-mir-468    | 8    | 7    | 0   | 4959 | 21  |
| mmu-mir-206    | 5    | 75   | 5   | 4860 | 5   |
| mmu-mir-449b   | 4    | 222  | 4   | 4701 | 0   |
| mmu-mir-141    | 11   | 1486 | 54  | 3289 | 5   |
| mmu-mir-202    | 7    | 2049 | 0   | 2689 | 24  |
| mmu-mir-1933   | 3    | 812  | 0   | 3895 | 5   |
| mmu-mir-802    | 1    | 4655 | 4   | 24   | 1   |
| mmu-mir-710    | 3    | 4573 | 0   | 30   | 3   |
| mmu-mir-1903   | 96   | 4415 | 0   | 61   | 1   |
| mmu-mir-466n   | 0    | 0    | 1   | 4521 | 17  |
| mmu-mir-1306   | 13   | 4469 | 1   | 13   | 8   |
| mmu-mir-878    | 4    | 502  | 2   | 3919 | 6   |
| mmu-mir-1195   | 28   | 3553 | 0   | 601  | 225 |
| mmu-mir-383    | 1    | 4345 | 0   | 32   | 9   |
| mmu-mir-377    | 1420 | 574  | 0   | 2233 | 34  |
| mmu-mir-1946b  | 5    | 734  | 0   | 3342 | 111 |
| mmu-mir-698    | 6    | 24   | 0   | 4091 | 5   |
| mmu-mir-451    | 9    | 3959 | 2   | 136  | 4   |
| mmu-mir-2145-2 | 613  | 3380 | 0   | 30   | 8   |
| mmu-mir-770    | 64   | 949  | 1   | 2881 | 11  |
| mmu-mir-511    | 13   | 1357 | 0   | 2388 | 14  |
| mmu-mir-216b   | 4    | 3721 | 0   | 10   | 8   |
| mmu-mir-758    | 5    | 192  | 0   | 3489 | 6   |
| mmu-mir-669d   | 1    | 3058 | 0   | 555  | 74  |
| mmu-mir-3062   | 17   | 3494 | 153 | 17   | 4   |
| mmu-mir-669d-2 | 18   | 3057 | 0   | 555  | 21  |
| mmu-mir-200c   | 7    | 554  | 14  | 3005 | 69  |
| mmu-mir-194-2  | 73   | 3390 | 3   | 53   | 12  |
| mmu-mir-1943   | 9    | 2686 | 3   | 815  | 9   |
| mmu-mir-467c   | 26   | 3299 | 0   | 125  | 3   |
| mmu-mir-450b   | 4    | 865  | 2   | 2571 | 3   |
| mmu-mir-1955   | 7    | 2994 | 1   | 401  | 2   |
| mmu-mir-1901   | 4    | 15   | 3   | 3208 | 4   |
| mmu-mir-669g   | 1    | 3123 | 8   | 21   | 6   |
| mmu-mir-679    | 38   | 3109 | 0   | 1    | 0   |
| mmu-mir-450a-1 | 4    | 3039 | 2   | 75   | 3   |
| mmu-mir-450a-2 | 16   | 3040 | 0   | 41   | 11  |
| mmu-mir-338    | 8    | 890  | 0   | 2132 | 1   |
| mmu-mir-499    | 7    | 2327 | 0   | 678  | 3   |
| mmu-mir-1899   | 2    | 2963 | 0   | 40   | 0   |

|                |     |      |    |      |    |
|----------------|-----|------|----|------|----|
| mmu-mir-219-1  | 80  | 1372 | 4  | 1527 | 21 |
| mmu-mir-1941   | 28  | 130  | 0  | 2834 | 6  |
| mmu-mir-153    | 8   | 33   | 3  | 2825 | 15 |
| mmu-mir-1843   | 0   | 1198 | 1  | 1655 | 5  |
| mmu-mir-1963   | 2   | 2799 | 0  | 12   | 8  |
| mmu-mir-1950   | 4   | 2774 | 0  | 24   | 4  |
| mmu-mir-669l   | 158 | 1995 | 0  | 623  | 11 |
| mmu-mir-759    | 2   | 2281 | 0  | 420  | 1  |
| mmu-mir-2145-1 | 4   | 341  | 2  | 2351 | 0  |
| mmu-mir-297a-3 | 91  | 2496 | 0  | 61   | 1  |
| mmu-mir-1964   | 1   | 454  | 2  | 2175 | 2  |
| mmu-mir-704    | 10  | 30   | 2  | 2586 | 5  |
| mmu-mir-297a-4 | 91  | 2496 | 0  | 33   | 2  |
| mmu-mir-1954   | 9   | 2505 | 0  | 33   | 31 |
| mmu-mir-489    | 2   | 85   | 0  | 2458 | 4  |
| mmu-mir-719    | 12  | 2445 | 0  | 20   | 34 |
| mmu-mir-297a-6 | 11  | 11   | 0  | 2478 | 0  |
| mmu-mir-297a-1 | 1   | 2474 | 0  | 6    | 0  |
| mmu-mir-297a-2 | 4   | 6    | 3  | 2442 | 22 |
| mmu-mir-7b     | 6   | 2339 | 2  | 123  | 2  |
| mmu-mir-194-1  | 1   | 2445 | 0  | 14   | 3  |
| mmu-mir-690    | 2   | 9    | 0  | 2444 | 2  |
| mmu-mir-1-2-as | 1   | 2009 | 0  | 432  | 0  |
| mmu-mir-3096   | 7   | 1559 | 0  | 853  | 14 |
| mmu-mir-466m   | 32  | 204  | 0  | 2085 | 94 |
| mmu-mir-466f-4 | 10  | 2318 | 0  | 52   | 16 |
| mmu-mir-1188   | 7   | 1505 | 6  | 865  | 5  |
| mmu-mir-1970   | 3   | 2365 | 0  | 8    | 4  |
| mmu-mir-688    | 16  | 14   | 0  | 2327 | 10 |
| mmu-mir-743a   | 1   | 593  | 0  | 1740 | 2  |
| mmu-mir-2137   | 8   | 9    | 0  | 2303 | 5  |
| mmu-mir-466c-2 | 6   | 2310 | 0  | 7    | 0  |
| mmu-mir-695    | 4   | 2212 | 0  | 100  | 4  |
| mmu-mir-466c-1 | 1   | 2310 | 0  | 9    | 0  |
| mmu-mir-669c   | 0   | 2128 | 0  | 116  | 16 |
| mmu-mir-1896   | 2   | 10   | 0  | 2223 | 3  |
| mmu-mir-653    | 6   | 2182 | 0  | 21   | 2  |
| mmu-mir-452    | 1   | 1826 | 2  | 297  | 6  |
| mmu-mir-491    | 5   | 940  | 2  | 1145 | 6  |
| mmu-mir-547    | 9   | 29   | 11 | 2031 | 5  |
| mmu-mir-297b   | 8   | 2054 | 0  | 10   | 4  |

|               |     |      |    |      |    |
|---------------|-----|------|----|------|----|
| mmu-mir-466h  | 19  | 841  | 7  | 1200 | 7  |
| mmu-mir-470   | 4   | 1796 | 6  | 255  | 4  |
| mmu-mir-599   | 2   | 4    | 0  | 2015 | 8  |
| mmu-mir-681   | 20  | 1975 | 0  | 14   | 2  |
| mmu-mir-448   | 5   | 21   | 0  | 1933 | 5  |
| mmu-mir-449a  | 0   | 1863 | 3  | 18   | 7  |
| mmu-mir-1937c | 7   | 12   | 14 | 1847 | 3  |
| mmu-mir-1897  | 3   | 15   | 2  | 1839 | 4  |
| mmu-mir-384   | 8   | 369  | 7  | 1471 | 2  |
| mmu-mir-742   | 2   | 243  | 4  | 1604 | 1  |
| mmu-mir-147   | 4   | 70   | 0  | 1756 | 13 |
| mmu-mir-686   | 12  | 1782 | 0  | 19   | 2  |
| mmu-mir-592   | 3   | 1520 | 0  | 286  | 1  |
| mmu-mir-1247  | 28  | 1716 | 0  | 50   | 12 |
| mmu-mir-2139  | 1   | 11   | 0  | 1777 | 11 |
| mmu-mir-1957  | 24  | 1244 | 0  | 526  | 1  |
| mmu-mir-375   | 0   | 24   | 1  | 1749 | 15 |
| mmu-mir-105   | 3   | 1535 | 0  | 236  | 0  |
| mmu-mir-3061  | 6   | 177  | 1  | 1560 | 5  |
| mmu-mir-684-1 | 62  | 9    | 0  | 1650 | 5  |
| mmu-mir-684-2 | 62  | 9    | 0  | 1646 | 6  |
| mmu-mir-1894  | 6   | 1620 | 8  | 64   | 6  |
| mmu-mir-1186  | 119 | 1529 | 0  | 33   | 10 |
| mmu-mir-1931  | 1   | 5    | 0  | 1660 | 0  |
| mmu-mir-184   | 2   | 102  | 4  | 1548 | 2  |
| mmu-mir-453   | 1   | 3    | 0  | 1629 | 14 |
| mmu-mir-669f  | 14  | 1141 | 0  | 473  | 18 |
| mmu-mir-760   | 4   | 557  | 1  | 1011 | 70 |
| mmu-mir-741   | 1   | 4    | 0  | 1581 | 2  |
| mmu-mir-1948  | 91  | 49   | 0  | 1393 | 6  |
| mmu-mir-715   | 163 | 1184 | 24 | 118  | 24 |
| mmu-mir-880   | 3   | 5    | 1  | 1487 | 1  |
| mmu-mir-1952  | 1   | 1381 | 0  | 21   | 3  |
| mmu-mir-137   | 14  | 17   | 1  | 1311 | 39 |
| mmu-mir-3057  | 16  | 466  | 2  | 895  | 0  |
| mmu-mir-694   | 4   | 111  | 0  | 1250 | 9  |
| mmu-mir-1951  | 8   | 144  | 16 | 1201 | 1  |
| mmu-mir-693   | 2   | 1226 | 0  | 132  | 4  |
| mmu-mir-743b  | 8   | 864  | 3  | 480  | 2  |
| mmu-mir-677   | 0   | 1234 | 0  | 114  | 0  |
| mmu-mir-1190  | 8   | 33   | 0  | 1297 | 3  |



|                |     |      |   |      |     |
|----------------|-----|------|---|------|-----|
| mmu-mir-343    | 4   | 5    | 5 | 1283 | 15  |
| mmu-mir-713    | 0   | 206  | 0 | 1059 | 1   |
| mmu-mir-701    | 0   | 1222 | 0 | 39   | 0   |
| mmu-mir-762    | 4   | 8    | 0 | 1229 | 0   |
| mmu-mir-544    | 6   | 31   | 0 | 1194 | 3   |
| mmu-mir-464    | 4   | 7    | 0 | 1218 | 2   |
| mmu-mir-1187   | 3   | 1120 | 0 | 101  | 3   |
| mmu-mir-1967   | 5   | 13   | 0 | 1170 | 5   |
| mmu-mir-1932   | 11  | 6    | 6 | 1077 | 12  |
| mmu-mir-1264   | 1   | 7    | 0 | 1089 | 5   |
| mmu-mir-883b   | 1   | 812  | 1 | 266  | 4   |
| mmu-mir-1937a  | 5   | 1045 | 0 | 14   | 3   |
| mmu-mir-344b   | 4   | 2    | 0 | 1056 | 1   |
| mmu-mir-133b   | 3   | 14   | 0 | 1032 | 4   |
| mmu-mir-709    | 2   | 19   | 0 | 1020 | 5   |
| mmu-mir-706    | 430 | 281  | 0 | 330  | 1   |
| mmu-mir-3066   | 1   | 299  | 0 | 740  | 1   |
| mmu-mir-654    | 9   | 241  | 0 | 747  | 5   |
| mmu-mir-219-2  | 4   | 352  | 4 | 641  | 1   |
| mmu-mir-3471-1 | 18  | 43   | 0 | 923  | 13  |
| mmu-mir-466i   | 2   | 115  | 0 | 861  | 2   |
| mmu-mir-432    | 6   | 9    | 0 | 963  | 0   |
| mmu-mir-1960   | 2   | 959  | 0 | 6    | 4   |
| mmu-mir-1-1    | 1   | 27   | 0 | 933  | 9   |
| mmu-mir-763    | 5   | 947  | 0 | 10   | 0   |
| mmu-mir-1197   | 11  | 62   | 0 | 843  | 2   |
| mmu-mir-466l   | 2   | 15   | 0 | 888  | 13  |
| mmu-mir-3470b  | 40  | 219  | 3 | 627  | 10  |
| mmu-mir-1938   | 5   | 858  | 0 | 16   | 2   |
| mmu-mir-1905   | 1   | 3    | 0 | 859  | 8   |
| mmu-mir-1953   | 12  | 736  | 0 | 99   | 6   |
| mmu-mir-1940   | 6   | 804  | 6 | 17   | 4   |
| mmu-mir-1935   | 112 | 4    | 5 | 679  | 34  |
| mmu-mir-449c   | 8   | 794  | 0 | 15   | 0   |
| mmu-mir-873    | 8   | 741  | 0 | 65   | 0   |
| mmu-mir-1936   | 4   | 11   | 0 | 794  | 0   |
| mmu-mir-466d   | 0   | 0    | 0 | 692  | 113 |
| mmu-mir-682    | 8   | 14   | 0 | 741  | 40  |
| mmu-mir-3101   | 3   | 720  | 3 | 65   | 7   |
| mmu-mir-678    | 3   | 155  | 0 | 617  | 7   |
| mmu-mir-876    | 6   | 358  | 5 | 401  | 10  |

|                |     |     |    |     |    |
|----------------|-----|-----|----|-----|----|
| mmu-mir-1298   | 3   | 753 | 1  | 10  | 8  |
| mmu-mir-1966   | 3   | 747 | 4  | 10  | 4  |
| mmu-mir-3082   | 8   | 642 | 16 | 96  | 4  |
| mmu-mir-3078   | 63  | 509 | 4  | 144 | 39 |
| mmu-mir-297c   | 8   | 727 | 0  | 13  | 2  |
| mmu-mir-3074-1 | 9   | 49  | 12 | 673 | 6  |
| mmu-mir-144    | 7   | 668 | 0  | 63  | 7  |
| mmu-mir-1971   | 11  | 19  | 0  | 709 | 3  |
| mmu-mir-486    | 11  | 137 | 1  | 585 | 2  |
| mmu-mir-3091   | 1   | 473 | 0  | 259 | 1  |
| mmu-mir-717    | 287 | 428 | 0  | 7   | 6  |
| mmu-mir-1929   | 4   | 608 | 4  | 92  | 13 |
| mmu-mir-2136   | 3   | 7   | 0  | 637 | 50 |
| mmu-mir-703    | 129 | 146 | 14 | 395 | 12 |
| mmu-mir-881    | 3   | 469 | 0  | 130 | 32 |
| mmu-mir-883a   | 1   | 221 | 0  | 399 | 8  |
| mmu-mir-3084   | 0   | 0   | 0  | 615 | 1  |
| mmu-mir-471    | 2   | 579 | 4  | 24  | 4  |
| mmu-mir-467d   | 0   | 604 | 0  | 0   | 0  |
| mmu-mir-3076   | 4   | 107 | 1  | 486 | 3  |
| mmu-mir-1968   | 5   | 476 | 0  | 112 | 4  |
| mmu-mir-490    | 5   | 341 | 61 | 171 | 8  |
| mmu-mir-680-1  | 20  | 478 | 0  | 77  | 3  |
| mmu-mir-509    | 7   | 500 | 0  | 55  | 3  |
| mmu-mir-1945   | 2   | 12  | 3  | 545 | 2  |
| mmu-mir-879    | 3   | 18  | 4  | 534 | 3  |
| mmu-mir-467f   | 8   | 47  | 2  | 494 | 3  |
| mmu-mir-680-3  | 5   | 504 | 0  | 23  | 0  |
| mmu-mir-3097   | 5   | 191 | 2  | 329 | 5  |
| mmu-mir-1958   | 7   | 14  | 0  | 502 | 4  |
| mmu-mir-1947   | 11  | 223 | 0  | 285 | 5  |
| mmu-mir-3058   | 1   | 231 | 1  | 285 | 3  |
| mmu-mir-465b-1 | 0   | 506 | 0  | 11  | 2  |
| mmu-mir-465b-2 | 0   | 506 | 0  | 11  | 2  |
| mmu-mir-680-2  | 9   | 478 | 0  | 24  | 2  |
| mmu-mir-327    | 2   | 459 | 0  | 23  | 0  |
| mmu-mir-3107   | 7   | 395 | 8  | 53  | 5  |
| mmu-mir-208b   | 40  | 3   | 0  | 414 | 3  |
| mmu-mir-871    | 7   | 393 | 0  | 50  | 8  |
| mmu-mir-190b   | 10  | 409 | 0  | 25  | 3  |
| mmu-mir-1892   | 5   | 62  | 1  | 367 | 1  |

|                |    |     |    |     |    |
|----------------|----|-----|----|-----|----|
| mmu-mir-1969   | 2  | 363 | 0  | 40  | 1  |
| mmu-mir-1961   | 6  | 133 | 0  | 257 | 4  |
| mmu-mir-1192   | 0  | 255 | 0  | 142 | 2  |
| mmu-mir-875    | 9  | 122 | 0  | 266 | 0  |
| mmu-mir-344e   | 48 | 7   | 1  | 333 | 7  |
| mmu-mir-669b   | 4  | 75  | 0  | 303 | 2  |
| mmu-mir-683-1  | 1  | 4   | 3  | 368 | 2  |
| mmu-mir-683-2  | 1  | 4   | 3  | 368 | 2  |
| mmu-mir-201    | 10 | 304 | 1  | 37  | 25 |
| mmu-mir-3109   | 4  | 209 | 7  | 135 | 7  |
| mmu-mir-3470a  | 33 | 67  | 2  | 218 | 25 |
| mmu-mir-344c   | 4  | 23  | 2  | 306 | 5  |
| mmu-mir-669o   | 5  | 127 | 0  | 202 | 5  |
| mmu-mir-467h   | 16 | 23  | 0  | 292 | 0  |
| mmu-mir-882    | 5  | 315 | 0  | 9   | 0  |
| mmu-mir-1906-2 | 5  | 9   | 2  | 304 | 6  |
| mmu-mir-466b-3 | 4  | 1   | 0  | 318 | 0  |
| mmu-mir-3108   | 5  | 255 | 2  | 60  | 0  |
| mmu-mir-3098   | 27 | 109 | 5  | 172 | 1  |
| mmu-mir-3085   | 10 | 70  | 65 | 164 | 4  |
| mmu-mir-465a   | 2  | 300 | 0  | 11  | 0  |
| mmu-mir-705    | 6  | 224 | 0  | 44  | 19 |
| mmu-mir-1906-1 | 5  | 9   | 0  | 277 | 0  |
| mmu-mir-3095   | 7  | 61  | 2  | 210 | 10 |
| mmu-mir-1898   | 0  | 279 | 0  | 7   | 0  |
| mmu-mir-3074-2 | 9  | 52  | 0  | 207 | 14 |
| mmu-mir-3077   | 10 | 8   | 2  | 253 | 6  |
| mmu-mir-1962   | 3  | 7   | 0  | 264 | 0  |
| mmu-mir-669k   | 3  | 3   | 0  | 258 | 9  |
| mmu-mir-2861   | 3  | 9   | 0  | 249 | 0  |
| mmu-mir-3105   | 4  | 188 | 2  | 57  | 8  |
| mmu-mir-3113   | 2  | 157 | 0  | 90  | 7  |
| mmu-mir-711    | 7  | 5   | 14 | 204 | 8  |
| mmu-mir-344g   | 4  | 12  | 4  | 209 | 1  |
| mmu-mir-3069   | 6  | 27  | 11 | 177 | 3  |
| mmu-mir-1199   | 13 | 169 | 0  | 33  | 1  |
| mmu-mir-3064   | 3  | 30  | 1  | 174 | 8  |
| mmu-mir-1895   | 10 | 16  | 0  | 183 | 6  |
| mmu-mir-344f   | 5  | 63  | 3  | 130 | 13 |
| mmu-mir-669j   | 3  | 19  | 0  | 176 | 0  |
| mmu-mir-1907   | 11 | 9   | 0  | 174 | 4  |

|                 |    |     |    |     |    |
|-----------------|----|-----|----|-----|----|
| mmu-mir-3081    | 6  | 39  | 1  | 144 | 7  |
| mmu-mir-3073    | 5  | 86  | 0  | 90  | 8  |
| mmu-mir-467b    | 0  | 0   | 0  | 189 | 0  |
| mmu-mir-1904    | 1  | 70  | 3  | 82  | 30 |
| mmu-mir-465c-2  | 0  | 175 | 0  | 5   | 0  |
| mmu-mir-465c-1  | 0  | 175 | 0  | 5   | 0  |
| mmu-mir-3092    | 5  | 39  | 8  | 122 | 3  |
| mmu-mir-374c    | 3  | 138 | 0  | 32  | 2  |
| mmu-mir-3099    | 19 | 20  | 1  | 128 | 6  |
| mmu-mir-3089    | 2  | 9   | 0  | 157 | 3  |
| mmu-mir-466j    | 4  | 45  | 0  | 103 | 14 |
| mmu-mir-1186b   | 88 | 36  | 0  | 34  | 2  |
| mmu-mir-1937b-2 | 1  | 62  | 0  | 85  | 9  |
| mmu-mir-216a    | 2  | 138 | 0  | 14  | 0  |
| mmu-mir-3094    | 0  | 34  | 0  | 90  | 22 |
| mmu-mir-3079    | 3  | 7   | 0  | 129 | 6  |
| mmu-mir-1942    | 15 | 100 | 0  | 21  | 5  |
| mmu-mir-3063    | 2  | 65  | 4  | 68  | 2  |
| mmu-mir-466k    | 87 | 20  | 0  | 26  | 2  |
| mmu-mir-466o    | 0  | 0   | 0  | 130 | 2  |
| mmu-mir-3065    | 9  | 17  | 1  | 101 | 1  |
| mmu-mir-669n    | 14 | 81  | 1  | 21  | 3  |
| mmu-mir-3070a   | 0  | 4   | 0  | 107 | 0  |
| mmu-mir-1928    | 8  | 2   | 1  | 90  | 10 |
| mmu-mir-3086    | 2  | 11  | 0  | 88  | 9  |
| mmu-mir-3087    | 10 | 15  | 0  | 49  | 34 |
| mmu-mir-3471-2  | 21 | 27  | 0  | 59  | 0  |
| mmu-mir-804     | 4  | 21  | 0  | 74  | 6  |
| mmu-mir-3474    | 3  | 73  | 0  | 23  | 0  |
| mmu-mir-3100    | 48 | 6   | 0  | 36  | 1  |
| mmu-mir-1251    | 15 | 56  | 0  | 10  | 5  |
| mmu-mir-3103    | 6  | 7   | 0  | 71  | 1  |
| mmu-mir-3472    | 6  | 8   | 0  | 55  | 15 |
| mmu-mir-1912    | 14 | 4   | 0  | 61  | 2  |
| mmu-mir-546     | 2  | 23  | 17 | 36  | 2  |
| mmu-mir-1937b-5 | 1  | 62  | 0  | 15  | 2  |
| mmu-mir-1902    | 4  | 3   | 0  | 70  | 1  |
| mmu-mir-1937b-4 | 1  | 62  | 0  | 11  | 2  |
| mmu-mir-3112    | 1  | 39  | 0  | 30  | 5  |
| mmu-mir-208a    | 2  | 45  | 0  | 27  | 0  |
| mmu-mir-3071    | 3  | 6   | 0  | 59  | 4  |

|                 |    |    |   |    |    |
|-----------------|----|----|---|----|----|
| mmu-mir-568     | 6  | 41 | 0 | 22 | 0  |
| mmu-mir-3088    | 14 | 13 | 1 | 38 | 2  |
| mmu-mir-3075    | 4  | 13 | 1 | 43 | 4  |
| mmu-mir-467g    | 1  | 4  | 0 | 57 | 0  |
| mmu-mir-3067    | 9  | 23 | 0 | 29 | 0  |
| mmu-mir-718     | 1  | 6  | 0 | 48 | 1  |
| mmu-mir-3475    | 3  | 8  | 0 | 30 | 13 |
| mmu-mir-3090    | 3  | 6  | 0 | 36 | 6  |
| mmu-mir-669p-1  | 0  | 0  | 0 | 50 | 0  |
| mmu-mir-669p-2  | 0  | 0  | 0 | 50 | 0  |
| mmu-mir-3080    | 10 | 3  | 0 | 17 | 11 |
| mmu-mir-669i    | 0  | 3  | 0 | 30 | 8  |
| mmu-mir-3110    | 2  | 16 | 0 | 15 | 3  |
| mmu-mir-466p    | 0  | 6  | 0 | 30 | 0  |
| mmu-mir-466a    | 0  | 23 | 0 | 10 | 2  |
| mmu-mir-1893    | 10 | 3  | 0 | 11 | 10 |
| mmu-mir-3070b   | 0  | 5  | 0 | 27 | 1  |
| mmu-mir-3104    | 7  | 13 | 2 | 4  | 6  |
| mmu-mir-3093    | 1  | 11 | 0 | 12 | 3  |
| mmu-mir-3059    | 2  | 15 | 0 | 9  | 0  |
| mmu-mir-691     | 3  | 4  | 0 | 18 | 1  |
| mmu-mir-3083    | 5  | 5  | 0 | 12 | 0  |
| mmu-mir-669a-3  | 0  | 0  | 0 | 19 | 3  |
| mmu-mir-3106    | 5  | 5  | 0 | 7  | 0  |
| mmu-mir-669a-2  | 0  | 0  | 0 | 13 | 0  |
| mmu-mir-467a-9  | 0  | 3  | 0 | 5  | 0  |
| mmu-mir-467a-1  | 2  | 2  | 0 | 4  | 0  |
| mmu-mir-467a-4  | 0  | 3  | 0 | 5  | 0  |
| mmu-mir-467a-7  | 0  | 3  | 0 | 5  | 0  |
| mmu-mir-669a-5  | 0  | 0  | 0 | 7  | 0  |
| mmu-mir-467a-2  | 0  | 3  | 0 | 1  | 0  |
| mmu-mir-467a-3  | 0  | 0  | 0 | 2  | 1  |
| mmu-mir-467a-6  | 0  | 0  | 0 | 2  | 1  |
| mmu-mir-467a-5  | 0  | 3  | 0 | 0  | 0  |
| mmu-mir-466b-7  | 0  | 0  | 0 | 3  | 0  |
| mmu-mir-467a-8  | 0  | 3  | 0 | 0  | 0  |
| mmu-mir-467a-10 | 0  | 0  | 0 | 2  | 1  |
| mmu-mir-669a-12 | 0  | 0  | 0 | 3  | 0  |
| mmu-mir-669a-1  | 0  | 0  | 0 | 2  | 0  |
| mmu-mir-466b-2  | 0  | 2  | 0 | 0  | 0  |
| mmu-mir-466b-4  | 0  | 0  | 0 | 1  | 0  |

|                 |   |   |   |   |   |
|-----------------|---|---|---|---|---|
| mmu-mir-669a-10 | 0 | 0 | 0 | 1 | 0 |
| mmu-mir-669a-4  | 0 | 0 | 0 | 1 | 0 |
| mmu-mir-669a-11 | 0 | 0 | 0 | 1 | 0 |
| mmu-mir-669a-9  | 0 | 0 | 0 | 1 | 0 |
| mmu-mir-669a-8  | 0 | 0 | 0 | 1 | 0 |
| mmu-mir-466b-6  | 0 | 0 | 0 | 1 | 0 |
| mmu-mir-669a-7  | 0 | 0 | 0 | 1 | 0 |
| mmu-mir-669a-6  | 0 | 0 | 0 | 1 | 0 |
| mmu-mir-466b-5  | 0 | 0 | 0 | 1 | 0 |

Supplementary Table S4. Phased reads of 5p/3p, moRs and loops in Hippocampus-AGO-IP data.

| .miRNAs        | 5moR | 5p      | loop | 3p      | 3moR |
|----------------|------|---------|------|---------|------|
| mmu-mir-124-2  | 6    | 12500   | 0    | 9834468 | 7    |
| mmu-mir-124-1  | 5    | 12500   | 0    | 9834115 | 4    |
| mmu-mir-124-3  | 7    | 12495   | 0    | 9833908 | 2    |
| mmu-mir-29a    | 0    | 6483    | 1    | 4471752 | 0    |
| mmu-mir-128-1  | 3    | 517     | 0    | 2830526 | 4    |
| mmu-mir-128-2  | 10   | 580     | 0    | 2827340 | 4    |
| mmu-mir-9-1    | 6    | 2471074 | 1    | 57412   | 0    |
| mmu-mir-9-2    | 1    | 2471074 | 2    | 57412   | 0    |
| mmu-mir-9-3    | 1    | 2470581 | 1    | 51069   | 1    |
| mmu-mir-29c    | 0    | 18914   | 1    | 1986606 | 3    |
| mmu-mir-125b-2 | 20   | 1763436 | 0    | 5252    | 0    |
| mmu-mir-125b-1 | 20   | 1765567 | 1    | 726     | 3    |
| mmu-mir-138-1  | 4    | 1523022 | 2    | 5304    | 1    |
| mmu-mir-138-2  | 6    | 1493253 | 401  | 4271    | 2    |
| mmu-mir-29b-1  | 1    | 1913    | 0    | 964795  | 2    |
| mmu-mir-29b-2  | 4    | 4481    | 0    | 852716  | 2    |
| mmu-mir-125a   | 3    | 703826  | 0    | 1216    | 0    |
| mmu-mir-30c-2  | 4    | 689422  | 1    | 269     | 0    |
| mmu-mir-30c-1  | 1    | 689155  | 1    | 83      | 1    |
| mmu-mir-26a-2  | 1    | 686161  | 0    | 260     | 0    |
| mmu-mir-26a-1  | 0    | 686112  | 0    | 72      | 1    |
| mmu-mir-99a    | 1    | 674690  | 0    | 8675    | 1    |
| mmu-let-7b     | 5    | 573083  | 5    | 6574    | 2    |
| mmu-mir-132    | 2    | 64136   | 0    | 442510  | 4    |
| mmu-mir-434    | 7    | 17551   | 0    | 465296  | 0    |
| mmu-mir-126    | 2    | 269538  | 0    | 175681  | 0    |
| mmu-mir-145    | 4    | 437988  | 3    | 666     | 0    |
| mmu-mir-218-1  | 1    | 428452  | 3    | 240     | 0    |
| mmu-let-7g     | 1    | 392963  | 0    | 3270    | 6    |
| mmu-mir-139    | 2    | 393516  | 0    | 1400    | 1    |
| mmu-mir-218-2  | 1    | 388987  | 19   | 1593    | 3    |
| mmu-mir-487b   | 0    | 102     | 2    | 375606  | 0    |
| mmu-mir-129-2  | 2    | 44097   | 15   | 289486  | 0    |
| mmu-mir-24-2   | 4    | 2704    | 0    | 330454  | 3    |
| mmu-mir-24-1   | 4    | 530     | 0    | 330455  | 0    |
| mmu-let-7c-1   | 0    | 319568  | 37   | 508     | 0    |
| mmu-let-7c-2   | 1    | 319337  | 1    | 17      | 0    |
| mmu-let-7f-2   | 1    | 297923  | 1    | 11545   | 1    |
| mmu-let-7f-1   | 0    | 293799  | 0    | 3391    | 3    |
| mmu-mir-200a   | 1    | 888     | 0    | 293196  | 1    |
| mmu-mir-181a-1 | 2    | 278291  | 1    | 13445   | 0    |
| mmu-mir-30b    | 1    | 281965  | 0    | 360     | 0    |
| mmu-mir-181a-2 | 2    | 278291  | 0    | 653     | 0    |

|                |    |        |     |        |   |
|----------------|----|--------|-----|--------|---|
| mmu-let-7a-2   | 1  | 269534 | 7   | 377    | 0 |
| mmu-let-7a-1   | 3  | 269605 | 2   | 17     | 1 |
| mmu-mir-204    | 2  | 228602 | 6   | 167    | 0 |
| mmu-mir-107    | 1  | 2905   | 0   | 222720 | 1 |
| mmu-mir-103-2  | 4  | 800    | 0   | 220277 | 0 |
| mmu-mir-103-1  | 5  | 595    | 0   | 220322 | 1 |
| mmu-mir-338    | 3  | 13632  | 0   | 203099 | 1 |
| mmu-mir-23a    | 0  | 44     | 0   | 206065 | 1 |
| mmu-mir-191    | 0  | 204041 | 0   | 768    | 0 |
| mmu-mir-23b    | 1  | 58     | 0   | 204405 | 0 |
| mmu-mir-136    | 3  | 124174 | 0   | 80154  | 0 |
| mmu-let-7i     | 2  | 196924 | 0   | 7036   | 4 |
| mmu-mir-143    | 0  | 60     | 0   | 187135 | 4 |
| mmu-mir-495    | 2  | 136    | 0   | 185624 | 2 |
| mmu-mir-337    | 4  | 6739   | 0   | 149704 | 0 |
| mmu-mir-100    | 0  | 154136 | 0   | 672    | 1 |
| mmu-mir-376b   | 2  | 18857  | 0   | 135923 | 0 |
| mmu-mir-135a-2 | 1  | 143250 | 1   | 515    | 0 |
| mmu-mir-135a-1 | 1  | 143232 | 0   | 60     | 1 |
| mmu-mir-127    | 0  | 8161   | 0   | 133348 | 0 |
| mmu-mir-328    | 1  | 17     | 0   | 136425 | 3 |
| mmu-mir-149    | 0  | 131574 | 0   | 1      | 0 |
| mmu-mir-27b    | 4  | 203    | 0   | 125082 | 1 |
| mmu-mir-429    | 0  | 1      | 0   | 122758 | 0 |
| mmu-mir-382    | 0  | 90191  | 0   | 29841  | 0 |
| mmu-mir-30e    | 3  | 106636 | 4   | 12996  | 7 |
| mmu-mir-130a   | 1  | 916    | 0   | 117276 | 1 |
| mmu-let-7d     | 1  | 68513  | 0   | 49500  | 9 |
| mmu-mir-30a    | 1  | 90832  | 0   | 26687  | 1 |
| mmu-mir-212    | 0  | 22620  | 0   | 94048  | 6 |
| mmu-mir-342    | 2  | 1095   | 1   | 109396 | 2 |
| mmu-mir-129-1  | 1  | 44097  | 1   | 63307  | 0 |
| mmu-mir-101a   | 2  | 921    | 0   | 102917 | 0 |
| mmu-mir-150    | 5  | 100594 | 3   | 23     | 1 |
| mmu-mir-7a-1   | 0  | 80634  | 2   | 14914  | 1 |
| mmu-mir-222    | 4  | 324    | 2   | 93101  | 1 |
| mmu-mir-219-2  | 11 | 8264   | 109 | 78559  | 5 |
| mmu-mir-7a-2   | 4  | 80302  | 0   | 5739   | 1 |
| mmu-mir-484    | 2  | 84989  | 0   | 22     | 2 |
| mmu-mir-154    | 1  | 56745  | 0   | 28244  | 0 |
| mmu-mir-21     | 1  | 84120  | 0   | 431    | 0 |
| mmu-mir-92b    | 0  | 420    | 0   | 79975  | 2 |
| mmu-let-7e     | 0  | 76514  | 3   | 2856   | 2 |
| mmu-mir-27a    | 1  | 7      | 3   | 78576  | 2 |
| mmu-mir-34a    | 0  | 73261  | 2   | 4467   | 0 |
| mmu-mir-221    | 2  | 1191   | 0   | 74235  | 1 |



|                |    |       |    |       |    |
|----------------|----|-------|----|-------|----|
| mmu-mir-541    | 0  | 73038 | 1  | 848   | 0  |
| mmu-mir-708    | 1  | 69518 | 2  | 4133  | 1  |
| mmu-mir-551b   | 1  | 62    | 0  | 72329 | 0  |
| mmu-mir-376a   | 1  | 2596  | 0  | 69173 | 0  |
| mmu-mir-30d    | 1  | 70681 | 0  | 264   | 1  |
| mmu-mir-369    | 1  | 23703 | 0  | 46356 | 0  |
| mmu-mir-1249   | 0  | 7     | 0  | 69147 | 0  |
| mmu-mir-16-2   | 2  | 68225 | 0  | 920   | 0  |
| mmu-mir-16-1   | 6  | 68351 | 12 | 145   | 1  |
| mmu-mir-300    | 0  | 2600  | 5  | 63413 | 2  |
| mmu-mir-137    | 22 | 666   | 0  | 62325 | 3  |
| mmu-mir-200b   | 0  | 2810  | 0  | 58745 | 0  |
| mmu-mir-361    | 0  | 47067 | 3  | 12986 | 3  |
| mmu-mir-543    | 0  | 1147  | 0  | 58755 | 0  |
| mmu-mir-381    | 0  | 1185  | 0  | 57151 | 0  |
| mmu-mir-151    | 0  | 54880 | 0  | 2824  | 0  |
| mmu-mir-666    | 0  | 979   | 0  | 55817 | 2  |
| mmu-mir-182    | 1  | 56504 | 0  | 81    | 1  |
| mmu-mir-22     | 2  | 31216 | 1  | 25023 | 0  |
| mmu-mir-323    | 0  | 1300  | 0  | 53071 | 0  |
| mmu-mir-181c   | 4  | 46688 | 0  | 4572  | 11 |
| mmu-mir-181b-2 | 1  | 50940 | 0  | 36    | 0  |
| mmu-mir-99b    | 0  | 44850 | 1  | 5092  | 1  |
| mmu-mir-193b   | 2  | 162   | 0  | 49409 | 4  |
| mmu-mir-187    | 1  | 1239  | 0  | 48058 | 0  |
| mmu-mir-451    | 0  | 48266 | 2  | 387   | 1  |
| mmu-mir-181b-1 | 0  | 48291 | 1  | 265   | 1  |
| mmu-mir-140    | 6  | 4851  | 0  | 43666 | 0  |
| mmu-mir-411    | 3  | 33599 | 0  | 13117 | 1  |
| mmu-mir-341    | 0  | 6     | 0  | 44639 | 1  |
| mmu-mir-329    | 0  | 5887  | 0  | 38186 | 0  |
| mmu-mir-598    | 2  | 30    | 0  | 43256 | 6  |
| mmu-mir-296    | 0  | 42598 | 0  | 405   | 2  |
| mmu-mir-183    | 3  | 40672 | 0  | 1689  | 3  |
| mmu-mir-409    | 1  | 10610 | 0  | 31742 | 2  |
| mmu-mir-872    | 1  | 9912  | 1  | 31468 | 0  |
| mmu-mir-378    | 0  | 7330  | 0  | 33253 | 2  |
| mmu-mir-668    | 1  | 49    | 1  | 39831 | 0  |
| mmu-mir-667    | 3  | 284   | 0  | 38476 | 0  |
| mmu-mir-101b   | 0  | 19    | 0  | 37048 | 2  |
| mmu-mir-92a-1  | 0  | 47    | 0  | 35308 | 1  |
| mmu-mir-1839   | 0  | 28264 | 1  | 4974  | 0  |
| mmu-mir-19b-1  | 0  | 179   | 0  | 33017 | 0  |
| mmu-mir-344-1  | 0  | 15    | 0  | 32073 | 0  |
| mmu-mir-344-2  | 0  | 15    | 0  | 32073 | 0  |
| mmu-mir-376c   | 0  | 1509  | 0  | 30531 | 1  |

|               |    |       |    |       |   |
|---------------|----|-------|----|-------|---|
| mmu-mir-7b    | 2  | 31102 | 0  | 427   | 0 |
| mmu-mir-383   | 3  | 30830 | 2  | 577   | 1 |
| mmu-mir-3102  | 14 | 553   | 0  | 30797 | 1 |
| mmu-mir-15a   | 7  | 30026 | 0  | 597   | 0 |
| mmu-mir-26b   | 0  | 30104 | 0  | 404   | 1 |
| mmu-mir-497   | 2  | 28977 | 0  | 1476  | 8 |
| mmu-mir-31    | 1  | 20291 | 1  | 9852  | 1 |
| mmu-mir-500   | 8  | 515   | 0  | 29480 | 0 |
| mmu-mir-301a  | 2  | 839   | 0  | 28326 | 4 |
| mmu-mir-433   | 0  | 2281  | 0  | 26853 | 2 |
| mmu-mir-33    | 1  | 21324 | 4  | 7537  | 0 |
| mmu-mir-582   | 1  | 24261 | 0  | 3985  | 0 |
| mmu-mir-326   | 1  | 6     | 0  | 27795 | 3 |
| mmu-mir-345   | 2  | 26702 | 4  | 274   | 1 |
| mmu-mir-19b-2 | 0  | 0     | 8  | 26378 | 0 |
| mmu-mir-365-1 | 3  | 8     | 0  | 26276 | 9 |
| mmu-mir-365-2 | 0  | 2     | 0  | 26270 | 0 |
| mmu-mir-20a   | 2  | 26019 | 3  | 118   | 2 |
| mmu-mir-186   | 4  | 24754 | 0  | 953   | 0 |
| mmu-mir-185   | 2  | 25596 | 0  | 69    | 1 |
| mmu-mir-106b  | 0  | 21187 | 3  | 4306  | 3 |
| mmu-mir-195   | 1  | 24923 | 1  | 507   | 0 |
| mmu-mir-384   | 1  | 12793 | 2  | 12494 | 1 |
| mmu-mir-331   | 5  | 264   | 1  | 24905 | 1 |
| mmu-mir-92a-2 | 1  | 1     | 0  | 24196 | 1 |
| mmu-mir-93    | 1  | 21664 | 1  | 2300  | 0 |
| mmu-mir-652   | 3  | 115   | 0  | 23686 | 1 |
| mmu-mir-532   | 0  | 16748 | 0  | 6431  | 0 |
| mmu-mir-320   | 0  | 21    | 0  | 22650 | 1 |
| mmu-mir-135b  | 0  | 21984 | 11 | 17    | 0 |
| mmu-mir-153   | 7  | 502   | 0  | 21227 | 0 |
| mmu-mir-17    | 1  | 19522 | 11 | 631   | 2 |
| mmu-mir-330   | 2  | 3925  | 3  | 15050 | 1 |
| mmu-mir-544   | 0  | 4246  | 1  | 14392 | 0 |
| mmu-mir-873   | 4  | 16921 | 0  | 744   | 2 |
| mmu-mir-425   | 1  | 12682 | 2  | 4093  | 0 |
| mmu-mir-141   | 0  | 1073  | 0  | 13774 | 1 |
| mmu-mir-340   | 1  | 8889  | 8  | 5939  | 0 |
| mmu-mir-379   | 1  | 8583  | 5  | 5288  | 0 |
| mmu-mir-744   | 3  | 12916 | 0  | 417   | 0 |
| mmu-mir-362   | 0  | 6461  | 9  | 6736  | 0 |
| mmu-mir-98    | 5  | 10923 | 0  | 1714  | 0 |
| mmu-mir-324   | 3  | 7178  | 0  | 5370  | 2 |
| mmu-mir-223   | 1  | 9     | 0  | 12416 | 5 |
| mmu-mir-15b   | 1  | 11254 | 1  | 1046  | 1 |
| mmu-mir-190   | 14 | 10425 | 0  | 1399  | 1 |

|                |     |       |     |       |    |
|----------------|-----|-------|-----|-------|----|
| mmu-mir-350    | 1   | 8     | 1   | 11695 | 0  |
| mmu-mir-485    | 5   | 695   | 206 | 10792 | 1  |
| mmu-mir-339    | 7   | 11174 | 0   | 352   | 2  |
| mmu-mir-25     | 0   | 46    | 0   | 11239 | 2  |
| mmu-mir-410    | 2   | 75    | 0   | 11171 | 1  |
| mmu-mir-380    | 0   | 541   | 1   | 10328 | 4  |
| mmu-mir-674    | 3   | 6126  | 0   | 4388  | 2  |
| mmu-mir-370    | 0   | 1766  | 4   | 8581  | 7  |
| mmu-mir-211    | 3   | 10351 | 0   | 1     | 0  |
| mmu-mir-664    | 0   | 144   | 0   | 10174 | 34 |
| mmu-mir-700    | 0   | 7505  | 2   | 2487  | 3  |
| mmu-mir-496    | 6   | 83    | 0   | 9006  | 1  |
| mmu-mir-322    | 1   | 7117  | 0   | 1704  | 0  |
| mmu-mir-210    | 0   | 277   | 1   | 8456  | 0  |
| mmu-mir-676    | 0   | 1602  | 0   | 7076  | 0  |
| mmu-mir-346    | 1   | 8256  | 0   | 5     | 0  |
| mmu-mir-146a   | 4   | 7979  | 0   | 23    | 1  |
| mmu-mir-192    | 0   | 7868  | 0   | 91    | 1  |
| mmu-mir-144    | 1   | 1106  | 2   | 6837  | 1  |
| mmu-mir-34c    | 0   | 7234  | 0   | 375   | 0  |
| mmu-mir-665    | 0   | 34    | 0   | 7405  | 0  |
| mmu-mir-335    | 0   | 3823  | 0   | 3568  | 0  |
| mmu-mir-770    | 599 | 2813  | 0   | 3883  | 39 |
| mmu-mir-200c   | 0   | 23    | 0   | 7297  | 3  |
| mmu-mir-421    | 0   | 46    | 0   | 7070  | 1  |
| mmu-mir-3072   | 0   | 7     | 0   | 6998  | 1  |
| mmu-mir-34b    | 2   | 2728  | 0   | 4253  | 0  |
| mmu-mir-181d   | 1   | 6803  | 1   | 21    | 1  |
| mmu-mir-877    | 1   | 237   | 0   | 6563  | 1  |
| mmu-mir-1-1    | 9   | 149   | 0   | 6476  | 1  |
| mmu-mir-1-2    | 1   | 26    | 4   | 6474  | 0  |
| mmu-mir-672    | 0   | 5908  | 1   | 584   | 0  |
| mmu-mir-702    | 2   | 14    | 0   | 6143  | 2  |
| mmu-mir-431    | 1   | 1927  | 4   | 4141  | 10 |
| mmu-mir-148a   | 0   | 71    | 1   | 5813  | 2  |
| mmu-mir-1843   | 1   | 3208  | 0   | 2436  | 1  |
| mmu-mir-574    | 1   | 1199  | 0   | 4391  | 2  |
| mmu-mir-344d-3 | 1   | 45    | 0   | 5475  | 2  |
| mmu-mir-344d-2 | 4   | 12    | 0   | 5475  | 2  |
| mmu-mir-344d-1 | 0   | 5     | 0   | 5478  | 1  |
| mmu-mir-219-1  | 129 | 5237  | 4   | 47    | 1  |
| mmu-mir-146b   | 0   | 5189  | 2   | 77    | 0  |
| mmu-mir-199b   | 0   | 5071  | 0   | 10    | 0  |
| mmu-mir-1983   | 0   | 298   | 0   | 4695  | 32 |
| mmu-mir-18a    | 0   | 4549  | 3   | 74    | 0  |
| mmu-mir-501    | 2   | 2373  | 1   | 2246  | 2  |

|                |     |      |   |      |    |
|----------------|-----|------|---|------|----|
| mmu-mir-134    | 134 | 3403 | 1 | 921  | 2  |
| mmu-mir-1298   | 0   | 4074 | 0 | 228  | 0  |
| mmu-mir-299    | 1   | 3389 | 0 | 794  | 0  |
| mmu-mir-148b   | 0   | 232  | 1 | 3870 | 0  |
| mmu-mir-203    | 0   | 25   | 0 | 3989 | 2  |
| mmu-mir-539    | 2   | 3974 | 0 | 30   | 0  |
| mmu-mir-199a-2 | 4   | 3894 | 0 | 18   | 0  |
| mmu-mir-199a-1 | 1   | 3898 | 0 | 15   | 1  |
| mmu-mir-490    | 0   | 957  | 3 | 2829 | 2  |
| mmu-mir-874    | 0   | 779  | 1 | 2553 | 0  |
| mmu-mir-423    | 1   | 392  | 1 | 2697 | 1  |
| mmu-mir-152    | 1   | 84   | 0 | 2995 | 0  |
| mmu-mir-3085   | 0   | 24   | 0 | 3048 | 0  |
| mmu-mir-671    | 1   | 1862 | 1 | 1196 | 0  |
| mmu-mir-96     | 3   | 2845 | 1 | 185  | 4  |
| mmu-mir-19a    | 0   | 11   | 0 | 2998 | 1  |
| mmu-mir-344b   | 2   | 2    | 0 | 2776 | 1  |
| mmu-mir-193    | 0   | 55   | 0 | 2619 | 0  |
| mmu-mir-142    | 6   | 1899 | 3 | 729  | 7  |
| mmu-mir-592    | 0   | 2145 | 2 | 415  | 0  |
| mmu-mir-455    | 13  | 319  | 7 | 2058 | 2  |
| mmu-mir-188    | 1   | 1664 | 0 | 650  | 0  |
| mmu-mir-351    | 5   | 2239 | 1 | 16   | 1  |
| mmu-mir-412    | 2   | 831  | 0 | 1348 | 0  |
| mmu-mir-690    | 0   | 2    | 0 | 2156 | 0  |
| mmu-mir-3099   | 0   | 130  | 0 | 1997 | 3  |
| mmu-mir-130b   | 1   | 1007 | 1 | 1118 | 1  |
| mmu-mir-540    | 1   | 1190 | 0 | 907  | 2  |
| mmu-mir-3068   | 0   | 917  | 0 | 1130 | 0  |
| mmu-mir-325    | 1   | 1123 | 6 | 882  | 33 |
| mmu-mir-1981   | 1   | 1508 | 0 | 476  | 1  |
| mmu-mir-1198   | 7   | 1951 | 2 | 24   | 1  |
| mmu-mir-1224   | 0   | 587  | 0 | 1379 | 1  |
| mmu-mir-377    | 1   | 353  | 0 | 1471 | 2  |
| mmu-mir-760    | 5   | 237  | 3 | 1568 | 6  |
| mmu-mir-505    | 0   | 856  | 0 | 951  | 1  |
| mmu-mir-448    | 4   | 988  | 0 | 780  | 2  |
| mmu-mir-3106   | 2   | 1593 | 0 | 150  | 0  |
| mmu-mir-494    | 1   | 13   | 1 | 1632 | 1  |
| mmu-mir-764    | 0   | 1023 | 1 | 570  | 0  |
| mmu-mir-298    | 0   | 1552 | 0 | 28   | 4  |
| mmu-mir-467e   | 3   | 1432 | 0 | 4    | 0  |
| mmu-mir-1193   | 0   | 31   | 1 | 1397 | 4  |
| mmu-mir-1191   | 1   | 2    | 0 | 1332 | 2  |
| mmu-mir-1264   | 2   | 88   | 0 | 1166 | 0  |
| mmu-mir-669c   | 0   | 1248 | 0 | 2    | 0  |

|                 |    |      |   |      |    |
|-----------------|----|------|---|------|----|
| mmu-mir-375     | 0  | 2    | 0 | 1205 | 0  |
| mmu-mir-670     | 4  | 632  | 0 | 546  | 10 |
| mmu-mir-721     | 0  | 3    | 0 | 1150 | 1  |
| mmu-mir-205     | 0  | 1117 | 1 | 2    | 1  |
| mmu-mir-344c    | 1  | 12   | 1 | 947  | 10 |
| mmu-mir-879     | 1  | 146  | 0 | 734  | 1  |
| mmu-mir-1247    | 30 | 821  | 0 | 14   | 1  |
| mmu-mir-503     | 42 | 543  | 2 | 271  | 0  |
| mmu-mir-3475    | 1  | 7    | 1 | 823  | 0  |
| mmu-mir-488     | 1  | 207  | 1 | 609  | 0  |
| mmu-mir-450a-1  | 0  | 742  | 0 | 45   | 0  |
| mmu-mir-450a-2  | 1  | 742  | 0 | 4    | 0  |
| mmu-mir-28      | 1  | 380  | 0 | 336  | 0  |
| mmu-mir-194-1   | 3  | 665  | 0 | 2    | 0  |
| mmu-mir-493     | 2  | 630  | 0 | 38   | 0  |
| mmu-mir-20b     | 0  | 548  | 0 | 74   | 0  |
| mmu-mir-1274a   | 0  | 611  | 0 | 4    | 0  |
| mmu-mir-3083    | 10 | 48   | 1 | 553  | 0  |
| mmu-mir-542     | 0  | 262  | 1 | 339  | 2  |
| mmu-mir-301b    | 0  | 21   | 1 | 578  | 2  |
| mmu-mir-194-2   | 1  | 575  | 0 | 14   | 1  |
| mmu-mir-3107    | 0  | 543  | 2 | 26   | 1  |
| mmu-mir-504     | 0  | 547  | 0 | 22   | 0  |
| mmu-mir-449a    | 1  | 530  | 0 | 36   | 0  |
| mmu-mir-1959    | 2  | 554  | 0 | 4    | 0  |
| mmu-mir-32      | 0  | 493  | 1 | 65   | 0  |
| mmu-mir-1961    | 5  | 153  | 0 | 375  | 1  |
| mmu-mir-673     | 1  | 281  | 0 | 235  | 1  |
| mmu-mir-3078    | 3  | 462  | 0 | 37   | 5  |
| mmu-mir-133a-1  | 2  | 37   | 0 | 466  | 2  |
| mmu-mir-133a-2  | 1  | 37   | 1 | 467  | 0  |
| mmu-mir-18b     | 25 | 476  | 0 | 5    | 0  |
| mmu-mir-106a    | 0  | 212  | 0 | 275  | 0  |
| mmu-mir-3060    | 2  | 18   | 0 | 452  | 1  |
| mmu-mir-374     | 2  | 369  | 0 | 100  | 1  |
| mmu-mir-483     | 4  | 74   | 0 | 390  | 1  |
| mmu-mir-758     | 3  | 11   | 0 | 423  | 0  |
| mmu-mir-1937b-1 | 1  | 416  | 0 | 16   | 2  |
| mmu-mir-1937b-3 | 0  | 414  | 0 | 16   | 0  |
| mmu-mir-720     | 0  | 5    | 0 | 408  | 2  |
| mmu-mir-224     | 0  | 406  | 0 | 7    | 0  |
| mmu-mir-1197    | 0  | 2    | 0 | 396  | 4  |
| mmu-mir-105     | 1  | 5    | 0 | 389  | 0  |
| mmu-mir-1982    | 0  | 2    | 0 | 363  | 0  |
| mmu-mir-10b     | 3  | 347  | 0 | 7    | 0  |
| mmu-mir-683-1   | 2  | 1    | 0 | 345  | 1  |

|                |    |     |   |     |    |
|----------------|----|-----|---|-----|----|
| mmu-mir-683-2  | 2  | 1   | 0 | 345 | 1  |
| mmu-mir-133b   | 0  | 1   | 1 | 345 | 0  |
| mmu-mir-206    | 0  | 1   | 0 | 338 | 1  |
| mmu-mir-297a-5 | 0  | 247 | 0 | 84  | 1  |
| mmu-mir-466c-2 | 1  | 322 | 0 | 2   | 0  |
| mmu-mir-466c-1 | 0  | 322 | 0 | 1   | 0  |
| mmu-mir-3061   | 0  | 74  | 0 | 243 | 1  |
| mmu-mir-297a-1 | 0  | 242 | 0 | 70  | 0  |
| mmu-mir-214    | 0  | 51  | 4 | 248 | 0  |
| mmu-mir-3059   | 3  | 249 | 1 | 42  | 1  |
| mmu-mir-491    | 1  | 79  | 0 | 214 | 0  |
| mmu-mir-122    | 0  | 280 | 0 | 3   | 0  |
| mmu-mir-1934   | 0  | 62  | 0 | 215 | 0  |
| mmu-mir-669d-2 | 16 | 246 | 0 | 7   | 0  |
| mmu-mir-297a-2 | 0  | 2   | 1 | 255 | 4  |
| mmu-mir-297a-6 | 3  | 5   | 0 | 252 | 0  |
| mmu-mir-669d   | 0  | 245 | 0 | 12  | 0  |
| mmu-mir-297a-3 | 0  | 247 | 0 | 8   | 1  |
| mmu-mir-297a-4 | 0  | 247 | 0 | 3   | 0  |
| mmu-mir-709    | 1  | 1   | 0 | 244 | 3  |
| mmu-mir-190b   | 1  | 240 | 0 | 6   | 1  |
| mmu-mir-1188   | 3  | 101 | 0 | 141 | 2  |
| mmu-mir-3473   | 3  | 25  | 0 | 215 | 3  |
| mmu-mir-1964   | 0  | 39  | 0 | 199 | 0  |
| mmu-mir-499    | 1  | 199 | 0 | 33  | 0  |
| mmu-mir-3087   | 1  | 30  | 0 | 198 | 1  |
| mmu-mir-489    | 1  | 3   | 1 | 218 | 1  |
| mmu-mir-10a    | 2  | 196 | 1 | 22  | 1  |
| mmu-mir-363    | 0  | 1   | 0 | 205 | 13 |
| mmu-mir-344f   | 0  | 63  | 0 | 143 | 0  |
| mmu-mir-1941   | 2  | 20  | 0 | 170 | 0  |
| mmu-mir-1943   | 1  | 21  | 0 | 166 | 1  |
| mmu-mir-1195   | 6  | 161 | 0 | 10  | 3  |
| mmu-mir-3097   | 0  | 63  | 0 | 109 | 2  |
| mmu-mir-202    | 3  | 162 | 0 | 1   | 1  |
| mmu-mir-486    | 7  | 107 | 3 | 47  | 1  |
| mmu-mir-615    | 0  | 150 | 0 | 9   | 3  |
| mmu-mir-3057   | 0  | 44  | 0 | 116 | 0  |
| mmu-mir-511    | 0  | 33  | 1 | 123 | 1  |
| mmu-mir-1251   | 0  | 144 | 0 | 12  | 1  |
| mmu-mir-155    | 0  | 152 | 0 | 1   | 1  |
| mmu-mir-184    | 0  | 4   | 0 | 147 | 1  |
| mmu-mir-2145-2 | 64 | 83  | 0 | 5   | 0  |
| mmu-mir-1912   | 4  | 133 | 0 | 11  | 0  |
| mmu-mir-3069   | 0  | 12  | 0 | 130 | 0  |
| mmu-mir-1935   | 0  | 0   | 0 | 135 | 5  |

|                |    |     |   |     |    |
|----------------|----|-----|---|-----|----|
| mmu-mir-466g   | 2  | 11  | 0 | 115 | 5  |
| mmu-mir-1953   | 1  | 2   | 0 | 124 | 0  |
| mmu-mir-1947   | 0  | 5   | 0 | 121 | 0  |
| mmu-mir-1927   | 1  | 32  | 1 | 88  | 0  |
| mmu-mir-450b   | 0  | 5   | 1 | 113 | 2  |
| mmu-mir-3101   | 1  | 108 | 0 | 7   | 1  |
| mmu-mir-3076   | 0  | 30  | 0 | 84  | 0  |
| mmu-mir-669e   | 1  | 96  | 0 | 13  | 1  |
| mmu-mir-3074-1 | 0  | 7   | 0 | 100 | 1  |
| mmu-mir-3082   | 1  | 72  | 1 | 33  | 1  |
| mmu-mir-3086   | 1  | 20  | 2 | 81  | 0  |
| mmu-mir-1907   | 8  | 2   | 0 | 92  | 0  |
| mmu-mir-3105   | 1  | 30  | 0 | 69  | 0  |
| mmu-mir-3093   | 3  | 21  | 0 | 72  | 4  |
| mmu-mir-3064   | 4  | 27  | 0 | 63  | 1  |
| mmu-mir-466f-2 | 0  | 16  | 0 | 71  | 8  |
| mmu-mir-802    | 0  | 80  | 1 | 10  | 0  |
| mmu-mir-196a-1 | 2  | 69  | 0 | 19  | 0  |
| mmu-mir-147    | 1  | 4   | 0 | 76  | 9  |
| mmu-mir-466i   | 0  | 14  | 0 | 74  | 0  |
| mmu-mir-217    | 0  | 62  | 2 | 23  | 0  |
| mmu-mir-669h   | 0  | 62  | 0 | 23  | 0  |
| mmu-mir-3470b  | 15 | 40  | 0 | 30  | 0  |
| mmu-mir-3062   | 0  | 66  | 0 | 10  | 0  |
| mmu-mir-344g   | 1  | 6   | 0 | 68  | 1  |
| mmu-mir-466f-3 | 7  | 16  | 0 | 48  | 4  |
| mmu-mir-196a-2 | 0  | 67  | 0 | 5   | 0  |
| mmu-mir-467c   | 3  | 63  | 0 | 4   | 0  |
| mmu-mir-1930   | 0  | 61  | 1 | 5   | 3  |
| mmu-mir-3471-1 | 0  | 5   | 0 | 63  | 1  |
| mmu-mir-466d   | 0  | 0   | 0 | 66  | 3  |
| mmu-mir-466k   | 0  | 64  | 0 | 3   | 1  |
| mmu-mir-1903   | 10 | 39  | 0 | 16  | 1  |
| mmu-mir-3104   | 1  | 5   | 0 | 59  | 1  |
| mmu-mir-876    | 2  | 50  | 0 | 11  | 3  |
| mmu-mir-669f   | 0  | 43  | 0 | 18  | 4  |
| mmu-mir-297c   | 0  | 63  | 0 | 1   | 0  |
| mmu-mir-701    | 0  | 57  | 0 | 6   | 0  |
| mmu-mir-466h   | 2  | 53  | 0 | 8   | 0  |
| mmu-mir-466f-1 | 7  | 16  | 0 | 37  | 2  |
| mmu-mir-1939   | 0  | 10  | 0 | 51  | 0  |
| mmu-mir-1955   | 1  | 32  | 0 | 27  | 1  |
| mmu-mir-344e   | 4  | 5   | 0 | 52  | 0  |
| mmu-mir-466m   | 2  | 11  | 0 | 38  | 10 |
| mmu-mir-3058   | 0  | 25  | 0 | 34  | 1  |
| mmu-mir-715    | 28 | 9   | 0 | 20  | 1  |

|                |    |    |   |    |   |
|----------------|----|----|---|----|---|
| mmu-mir-3084   | 0  | 0  | 0 | 55 | 2 |
| mmu-mir-3470a  | 10 | 11 | 0 | 30 | 5 |
| mmu-mir-1-2-as | 0  | 42 | 8 | 4  | 1 |
| mmu-mir-669m-2 | 1  | 1  | 0 | 52 | 1 |
| mmu-mir-669m-1 | 0  | 1  | 0 | 52 | 0 |
| mmu-mir-1942   | 2  | 3  | 6 | 40 | 0 |
| mmu-mir-669g   | 0  | 43 | 0 | 6  | 1 |
| mmu-mir-1968   | 1  | 35 | 2 | 12 | 0 |
| mmu-mir-3090   | 0  | 2  | 0 | 47 | 0 |
| mmu-mir-3091   | 0  | 17 | 0 | 32 | 0 |
| mmu-mir-1186   | 28 | 4  | 0 | 12 | 5 |
| mmu-mir-297b   | 1  | 44 | 0 | 4  | 0 |
| mmu-mir-449c   | 2  | 36 | 0 | 8  | 0 |
| mmu-mir-3095   | 3  | 22 | 2 | 19 | 0 |
| mmu-mir-1946b  | 4  | 33 | 0 | 8  | 0 |
| mmu-mir-1306   | 0  | 40 | 0 | 3  | 1 |
| mmu-mir-2136   | 0  | 5  | 0 | 39 | 0 |
| mmu-mir-467f   | 0  | 22 | 0 | 21 | 0 |
| mmu-mir-3077   | 0  | 0  | 1 | 41 | 1 |
| mmu-mir-467h   | 6  | 27 | 0 | 10 | 0 |
| mmu-mir-1901   | 3  | 22 | 0 | 16 | 2 |
| mmu-mir-3471-2 | 2  | 5  | 0 | 36 | 0 |
| mmu-mir-680-3  | 14 | 27 | 0 | 2  | 0 |
| mmu-mir-3103   | 1  | 2  | 1 | 38 | 0 |
| mmu-mir-2137   | 0  | 0  | 0 | 38 | 4 |
| mmu-mir-466f-4 | 9  | 17 | 0 | 15 | 1 |
| mmu-mir-1957   | 1  | 39 | 0 | 2  | 0 |
| mmu-mir-669l   | 2  | 34 | 0 | 5  | 0 |
| mmu-mir-759    | 1  | 4  | 0 | 35 | 0 |
| mmu-mir-3108   | 1  | 6  | 0 | 33 | 0 |
| mmu-mir-467g   | 0  | 12 | 0 | 26 | 2 |
| mmu-mir-1954   | 7  | 18 | 1 | 12 | 1 |
| mmu-mir-1906-2 | 5  | 2  | 0 | 32 | 0 |
| mmu-mir-743b   | 1  | 33 | 1 | 2  | 1 |
| mmu-mir-3081   | 0  | 1  | 0 | 35 | 1 |
| mmu-mir-466j   | 11 | 5  | 0 | 20 | 0 |
| mmu-mir-215    | 0  | 33 | 0 | 2  | 0 |
| mmu-mir-1186b  | 24 | 8  | 0 | 3  | 0 |
| mmu-mir-1969   | 1  | 28 | 0 | 5  | 0 |
| mmu-mir-883b   | 1  | 1  | 0 | 30 | 2 |
| mmu-mir-706    | 18 | 11 | 1 | 4  | 0 |
| mmu-mir-1196   | 3  | 23 | 0 | 8  | 0 |
| mmu-mir-677    | 0  | 19 | 0 | 14 | 0 |
| mmu-mir-568    | 12 | 16 | 0 | 4  | 1 |
| mmu-mir-3094   | 2  | 5  | 5 | 20 | 0 |
| mmu-mir-713    | 0  | 31 | 0 | 1  | 0 |



|                 |   |    |   |    |    |
|-----------------|---|----|---|----|----|
| mmu-mir-1937b-4 | 0 | 2  | 0 | 29 | 0  |
| mmu-mir-216b    | 0 | 30 | 0 | 1  | 0  |
| mmu-mir-679     | 0 | 30 | 0 | 1  | 0  |
| mmu-mir-1937b-5 | 0 | 2  | 0 | 28 | 0  |
| mmu-mir-216a    | 1 | 22 | 1 | 6  | 0  |
| mmu-mir-3070b   | 0 | 0  | 1 | 28 | 0  |
| mmu-mir-1965    | 1 | 4  | 0 | 21 | 3  |
| mmu-mir-1931    | 0 | 1  | 0 | 28 | 0  |
| mmu-mir-1966    | 1 | 12 | 1 | 15 | 0  |
| mmu-mir-467d    | 0 | 28 | 0 | 0  | 0  |
| mmu-mir-466l    | 3 | 3  | 0 | 20 | 2  |
| mmu-mir-1894    | 0 | 26 | 0 | 1  | 0  |
| mmu-mir-1895    | 0 | 1  | 0 | 23 | 3  |
| mmu-mir-1905    | 0 | 0  | 0 | 26 | 1  |
| mmu-mir-1906-1  | 5 | 2  | 0 | 19 | 0  |
| mmu-mir-881     | 1 | 23 | 0 | 2  | 0  |
| mmu-mir-291b    | 0 | 5  | 0 | 20 | 0  |
| mmu-mir-1952    | 1 | 18 | 0 | 6  | 0  |
| mmu-mir-466p    | 0 | 0  | 0 | 24 | 0  |
| mmu-mir-2145-1  | 0 | 7  | 0 | 16 | 0  |
| mmu-mir-761     | 1 | 1  | 0 | 21 | 0  |
| mmu-mir-1946a   | 2 | 16 | 0 | 4  | 1  |
| mmu-mir-694     | 1 | 9  | 0 | 13 | 0  |
| mmu-mir-880     | 1 | 17 | 0 | 4  | 1  |
| mmu-mir-3113    | 1 | 19 | 0 | 2  | 0  |
| mmu-mir-3112    | 1 | 3  | 0 | 18 | 0  |
| mmu-mir-1940    | 1 | 11 | 0 | 9  | 0  |
| mmu-mir-547     | 4 | 6  | 0 | 9  | 2  |
| mmu-mir-1948    | 9 | 6  | 0 | 4  | 2  |
| mmu-mir-3088    | 1 | 5  | 1 | 12 | 1  |
| mmu-mir-367     | 0 | 1  | 0 | 6  | 13 |
| mmu-mir-1898    | 1 | 13 | 0 | 5  | 0  |
| mmu-mir-695     | 2 | 1  | 0 | 16 | 0  |
| mmu-mir-1960    | 0 | 12 | 0 | 5  | 1  |
| mmu-mir-1928    | 0 | 0  | 5 | 11 | 2  |
| mmu-mir-684-1   | 0 | 2  | 0 | 14 | 2  |
| mmu-mir-703     | 1 | 1  | 0 | 15 | 0  |
| mmu-mir-1933    | 0 | 5  | 0 | 12 | 0  |
| mmu-mir-682     | 2 | 2  | 0 | 13 | 0  |
| mmu-mir-466n    | 0 | 0  | 0 | 17 | 0  |
| mmu-mir-719     | 0 | 8  | 0 | 9  | 0  |
| mmu-mir-1199    | 3 | 11 | 0 | 3  | 0  |
| mmu-mir-208b    | 1 | 1  | 0 | 14 | 1  |
| mmu-mir-3098    | 0 | 11 | 0 | 6  | 0  |
| mmu-mir-1899    | 0 | 1  | 0 | 15 | 0  |
| mmu-mir-3070a   | 0 | 0  | 0 | 16 | 0  |

|                 |   |    |   |    |   |
|-----------------|---|----|---|----|---|
| mmu-mir-207     | 2 | 8  | 0 | 6  | 0 |
| mmu-mir-3080    | 1 | 6  | 0 | 8  | 1 |
| mmu-mir-762     | 2 | 1  | 0 | 13 | 0 |
| mmu-mir-705     | 3 | 6  | 0 | 7  | 0 |
| mmu-mir-688     | 3 | 3  | 0 | 8  | 2 |
| mmu-mir-669i    | 0 | 5  | 0 | 7  | 4 |
| mmu-mir-693     | 2 | 2  | 0 | 11 | 1 |
| mmu-mir-1937c   | 0 | 2  | 0 | 6  | 7 |
| mmu-mir-1192    | 1 | 3  | 0 | 11 | 0 |
| mmu-mir-1944    | 0 | 9  | 0 | 6  | 0 |
| mmu-mir-599     | 2 | 3  | 0 | 9  | 1 |
| mmu-mir-1970    | 1 | 9  | 0 | 4  | 1 |
| mmu-mir-295     | 0 | 3  | 0 | 11 | 1 |
| mmu-mir-653     | 1 | 9  | 0 | 4  | 0 |
| mmu-mir-2861    | 0 | 3  | 0 | 11 | 0 |
| mmu-mir-1187    | 0 | 7  | 0 | 6  | 1 |
| mmu-mir-669o    | 0 | 6  | 0 | 8  | 0 |
| mmu-mir-878     | 0 | 3  | 1 | 9  | 1 |
| mmu-mir-692-2   | 3 | 2  | 2 | 5  | 2 |
| mmu-mir-1904    | 2 | 1  | 0 | 10 | 0 |
| mmu-mir-669j    | 4 | 2  | 0 | 5  | 2 |
| mmu-mir-3100    | 1 | 2  | 0 | 10 | 0 |
| mmu-mir-1893    | 5 | 6  | 0 | 2  | 0 |
| mmu-mir-675     | 0 | 2  | 0 | 11 | 0 |
| mmu-mir-290     | 1 | 6  | 0 | 6  | 0 |
| mmu-mir-374c    | 0 | 3  | 0 | 8  | 2 |
| mmu-mir-669b    | 0 | 5  | 0 | 8  | 0 |
| mmu-mir-718     | 0 | 4  | 0 | 8  | 1 |
| mmu-mir-1932    | 4 | 1  | 0 | 8  | 0 |
| mmu-mir-692-1   | 3 | 2  | 0 | 5  | 2 |
| mmu-mir-742     | 0 | 1  | 0 | 11 | 0 |
| mmu-mir-669k    | 1 | 1  | 0 | 9  | 1 |
| mmu-mir-3110    | 1 | 9  | 0 | 2  | 0 |
| mmu-mir-469     | 0 | 1  | 0 | 11 | 0 |
| mmu-mir-3096    | 0 | 1  | 0 | 11 | 0 |
| mmu-mir-449b    | 2 | 4  | 0 | 6  | 0 |
| mmu-mir-208a    | 0 | 0  | 0 | 10 | 1 |
| mmu-mir-1937b-2 | 0 | 2  | 0 | 9  | 0 |
| mmu-mir-3472    | 3 | 6  | 0 | 2  | 0 |
| mmu-mir-3089    | 1 | 1  | 0 | 9  | 0 |
| mmu-mir-681     | 0 | 7  | 0 | 4  | 0 |
| mmu-mir-465a    | 0 | 2  | 0 | 9  | 0 |
| mmu-mir-467b    | 0 | 0  | 0 | 11 | 0 |
| mmu-mir-1929    | 0 | 1  | 0 | 9  | 1 |
| mmu-mir-717     | 0 | 10 | 0 | 1  | 0 |
| mmu-mir-294     | 0 | 1  | 0 | 10 | 0 |

|                 |   |   |   |   |   |
|-----------------|---|---|---|---|---|
| mmu-mir-1951    | 0 | 9 | 0 | 2 | 0 |
| mmu-mir-293     | 1 | 5 | 0 | 3 | 1 |
| mmu-mir-1949    | 0 | 1 | 1 | 7 | 1 |
| mmu-mir-3067    | 0 | 4 | 0 | 4 | 2 |
| mmu-mir-686     | 1 | 1 | 0 | 5 | 3 |
| mmu-mir-669n    | 1 | 6 | 0 | 2 | 1 |
| mmu-mir-3065    | 1 | 6 | 0 | 1 | 2 |
| mmu-mir-1971    | 0 | 4 | 0 | 6 | 0 |
| mmu-mir-3066    | 0 | 6 | 0 | 3 | 1 |
| mmu-mir-1963    | 0 | 3 | 0 | 7 | 0 |
| mmu-mir-704     | 0 | 0 | 0 | 9 | 0 |
| mmu-mir-3474    | 2 | 5 | 0 | 1 | 1 |
| mmu-mir-546     | 0 | 3 | 0 | 5 | 1 |
| mmu-mir-302d    | 1 | 2 | 0 | 6 | 0 |
| mmu-mir-3079    | 0 | 4 | 0 | 4 | 1 |
| mmu-mir-291a    | 0 | 4 | 0 | 5 | 0 |
| mmu-mir-1897    | 0 | 2 | 0 | 5 | 2 |
| mmu-mir-3109    | 0 | 4 | 0 | 4 | 0 |
| mmu-mir-327     | 1 | 1 | 3 | 2 | 1 |
| mmu-mir-452     | 1 | 5 | 0 | 2 | 0 |
| mmu-mir-3071    | 2 | 3 | 0 | 3 | 0 |
| mmu-mir-3063    | 1 | 4 | 0 | 2 | 1 |
| mmu-mir-3073    | 1 | 2 | 0 | 4 | 1 |
| mmu-mir-1900    | 0 | 1 | 2 | 4 | 1 |
| mmu-mir-3075    | 0 | 1 | 0 | 4 | 3 |
| mmu-mir-1938    | 0 | 2 | 0 | 5 | 1 |
| mmu-mir-1896    | 0 | 2 | 0 | 6 | 0 |
| mmu-mir-669a-12 | 0 | 0 | 0 | 8 | 0 |
| mmu-mir-509     | 1 | 4 | 0 | 2 | 1 |
| mmu-mir-1956    | 4 | 2 | 0 | 1 | 0 |
| mmu-mir-466o    | 0 | 0 | 0 | 7 | 0 |
| mmu-mir-302b    | 2 | 1 | 1 | 3 | 0 |
| mmu-mir-1958    | 1 | 1 | 0 | 5 | 0 |
| mmu-mir-710     | 0 | 5 | 0 | 2 | 0 |
| mmu-mir-1937a   | 0 | 3 | 0 | 4 | 0 |
| mmu-mir-3074-2  | 0 | 6 | 0 | 1 | 0 |
| mmu-mir-882     | 0 | 4 | 0 | 3 | 0 |
| mmu-mir-678     | 1 | 1 | 0 | 2 | 3 |
| mmu-mir-1892    | 1 | 2 | 1 | 2 | 0 |
| mmu-mir-465b-1  | 0 | 2 | 0 | 1 | 3 |
| mmu-mir-471     | 0 | 2 | 0 | 4 | 0 |
| mmu-mir-1902    | 3 | 1 | 0 | 2 | 0 |
| mmu-mir-1950    | 0 | 1 | 0 | 5 | 0 |
| mmu-mir-871     | 0 | 1 | 0 | 5 | 0 |
| mmu-mir-201     | 0 | 2 | 0 | 3 | 1 |
| mmu-mir-465b-2  | 0 | 2 | 0 | 1 | 3 |

|                 |   |   |   |   |   |
|-----------------|---|---|---|---|---|
| mmu-mir-302a    | 1 | 3 | 0 | 2 | 0 |
| mmu-mir-763     | 0 | 1 | 0 | 3 | 2 |
| mmu-mir-697     | 0 | 2 | 0 | 3 | 0 |
| mmu-mir-1190    | 2 | 1 | 0 | 2 | 0 |
| mmu-mir-804     | 1 | 1 | 0 | 1 | 2 |
| mmu-mir-707     | 2 | 1 | 0 | 2 | 0 |
| mmu-mir-767     | 1 | 1 | 0 | 3 | 0 |
| mmu-mir-468     | 1 | 1 | 0 | 3 | 0 |
| mmu-mir-711     | 0 | 2 | 0 | 2 | 1 |
| mmu-mir-1945    | 0 | 1 | 0 | 4 | 0 |
| mmu-mir-292     | 1 | 1 | 0 | 2 | 0 |
| mmu-mir-669p-1  | 0 | 0 | 0 | 4 | 0 |
| mmu-mir-684-2   | 0 | 2 | 0 | 2 | 0 |
| mmu-mir-1962    | 0 | 1 | 0 | 3 | 0 |
| mmu-mir-3092    | 0 | 2 | 0 | 1 | 1 |
| mmu-mir-680-2   | 0 | 1 | 0 | 2 | 1 |
| mmu-mir-669p-2  | 0 | 0 | 0 | 4 | 0 |
| mmu-mir-302c    | 0 | 3 | 0 | 1 | 0 |
| mmu-mir-669a-3  | 0 | 0 | 0 | 4 | 0 |
| mmu-mir-669a-2  | 0 | 0 | 0 | 4 | 0 |
| mmu-mir-669a-1  | 0 | 0 | 0 | 4 | 0 |
| mmu-mir-743a    | 0 | 2 | 0 | 2 | 0 |
| mmu-mir-691     | 1 | 1 | 0 | 2 | 0 |
| mmu-mir-875     | 0 | 2 | 0 | 2 | 0 |
| mmu-mir-453     | 0 | 2 | 0 | 2 | 0 |
| mmu-mir-741     | 0 | 0 | 0 | 4 | 0 |
| mmu-mir-463     | 0 | 1 | 0 | 1 | 2 |
| mmu-mir-654     | 1 | 1 | 0 | 1 | 0 |
| mmu-mir-196b    | 0 | 0 | 0 | 3 | 0 |
| mmu-mir-883a    | 0 | 0 | 0 | 1 | 2 |
| mmu-mir-432     | 0 | 1 | 0 | 2 | 0 |
| mmu-mir-343     | 0 | 2 | 0 | 1 | 0 |
| mmu-mir-698     | 1 | 1 | 0 | 1 | 0 |
| mmu-mir-669a-10 | 0 | 0 | 0 | 3 | 0 |
| mmu-mir-1967    | 0 | 2 | 0 | 1 | 0 |
| mmu-mir-466a    | 0 | 0 | 0 | 3 | 0 |
| mmu-mir-669a-4  | 0 | 0 | 0 | 3 | 0 |
| mmu-mir-470     | 0 | 0 | 1 | 2 | 0 |
| mmu-mir-669a-11 | 0 | 0 | 0 | 3 | 0 |
| mmu-mir-465c-2  | 0 | 2 | 0 | 1 | 0 |
| mmu-mir-1936    | 0 | 2 | 0 | 1 | 0 |
| mmu-mir-687     | 0 | 1 | 0 | 2 | 0 |
| mmu-mir-669a-9  | 0 | 0 | 0 | 3 | 0 |
| mmu-mir-669a-8  | 0 | 0 | 0 | 3 | 0 |
| mmu-mir-465c-1  | 0 | 2 | 0 | 1 | 0 |
| mmu-mir-669a-7  | 0 | 0 | 0 | 3 | 0 |

|                 |   |   |   |   |   |
|-----------------|---|---|---|---|---|
| mmu-mir-669a-6  | 0 | 0 | 0 | 3 | 0 |
| mmu-mir-467a-5  | 0 | 2 | 0 | 0 | 0 |
| mmu-mir-669a-5  | 0 | 0 | 0 | 2 | 0 |
| mmu-mir-2139    | 0 | 0 | 0 | 1 | 1 |
| mmu-mir-467a-9  | 0 | 2 | 0 | 0 | 0 |
| mmu-mir-467a-4  | 0 | 2 | 0 | 0 | 0 |
| mmu-mir-680-1   | 0 | 1 | 0 | 1 | 0 |
| mmu-mir-467a-2  | 0 | 2 | 0 | 0 | 0 |
| mmu-mir-466b-7  | 0 | 0 | 0 | 2 | 0 |
| mmu-mir-467a-8  | 0 | 2 | 0 | 0 | 0 |
| mmu-mir-466b-2  | 0 | 2 | 0 | 0 | 0 |
| mmu-mir-467a-7  | 0 | 2 | 0 | 0 | 0 |
| mmu-mir-467a-3  | 0 | 0 | 0 | 1 | 0 |
| mmu-mir-467a-6  | 0 | 0 | 0 | 1 | 0 |
| mmu-mir-467a-1  | 0 | 0 | 0 | 1 | 0 |
| mmu-mir-466b-3  | 0 | 0 | 0 | 1 | 0 |
| mmu-mir-464     | 0 | 0 | 0 | 1 | 0 |
| mmu-mir-467a-10 | 0 | 0 | 0 | 1 | 0 |

Supplementary Table S5. Non-templated nucleotide addition at the 3' ends of both 5p and 3p.

|    |               | Hippocampus-AGO-IP | Hippocampus-total RNA | Reprogramming-total RNA |
|----|---------------|--------------------|-----------------------|-------------------------|
| 5p | A             | 285589             | 947290                | 2781477                 |
| 5p | AA            | 25955              | 115242                | 215504                  |
| 5p | AC            | 15184              | 69603                 | 34036                   |
| 5p | AG            | 20817              | 76969                 | 72670                   |
| 5p | AT            | 68858              | 198800                | 275387                  |
| 5p | C             | 276813             | 677844                | 790199                  |
| 5p | CA            | 14625              | 47670                 | 51960                   |
| 5p | CC            | 16862              | 46415                 | 44569                   |
| 5p | CG            | 21123              | 45998                 | 56114                   |
| 5p | CT            | 94892              | 169954                | 331492                  |
| 5p | G             | 81527              | 177658                | 382365                  |
| 5p | GA            | 20427              | 66696                 | 51321                   |
| 5p | GC            | 13692              | 44959                 | 64766                   |
| 5p | GG            | 8412               | 11998                 | 16240                   |
| 5p | GT            | 41187              | 70618                 | 62903                   |
| 5p | T             | 259363             | 531673                | 850720                  |
| 5p | TA            | 10617              | 22221                 | 39189                   |
| 5p | TC            | 19293              | 75800                 | 25537                   |
| 5p | TG            | 13199              | 29267                 | 18295                   |
| 5p | TT            | 27396              | 43287                 | 60636                   |
| 5p | Total_untempl | 1335831            | 3469962               | 6225380                 |
| 5p | Total_reads   | 6216242            | 16216774              | 46223197                |
| 3p | A             | 242216             | 839137                | 1965324                 |
| 3p | AA            | 28102              | 143743                | 305773                  |
| 3p | AC            | 16845              | 48717                 | 35376                   |
| 3p | AG            | 12917              | 33494                 | 53752                   |
| 3p | AT            | 75660              | 201783                | 296809                  |
| 3p | C             | 465293             | 791000                | 753539                  |
| 3p | CA            | 83283              | 195708                | 112346                  |
| 3p | CC            | 19955              | 66317                 | 45587                   |
| 3p | CG            | 18423              | 34586                 | 29553                   |
| 3p | CT            | 95649              | 184676                | 112270                  |
| 3p | G             | 239332             | 340881                | 357904                  |
| 3p | GA            | 52194              | 67940                 | 41709                   |
| 3p | GC            | 26944              | 71902                 | 30180                   |
| 3p | GG            | 9825               | 18298                 | 29124                   |
| 3p | GT            | 38931              | 109294                | 60281                   |
| 3p | T             | 743298             | 1068543               | 3723634                 |

|    |               |         |          |          |
|----|---------------|---------|----------|----------|
| 3p | TA            | 92442   | 75631    | 144838   |
| 3p | TC            | 28616   | 31878    | 31293    |
| 3p | TG            | 158877  | 98992    | 35574    |
| 3p | TT            | 73702   | 93060    | 126774   |
| 3p | Total_untempl | 2522504 | 4515580  | 8291640  |
| 3p | Total_reads   | 9989987 | 21885667 | 45338946 |

Supplementary Table S6. Non-templated nucleotide addition at the 3' ends of each miRNA.

| miR               | Hippocampus-AGO-IP |          | Hippocampus-total RNA |          | Reprogramming-total RNA |          |
|-------------------|--------------------|----------|-----------------------|----------|-------------------------|----------|
|                   | Total reads        | Addition | Total reads           | Addition | Total reads             | Addition |
| mmu-mir-29a-3p    | 1398467            | 0.06     | 4523613               | 0.09     | 2729657                 | 0.04     |
| mmu-mir-124-1-3p  | 3895826            | 0.37     | 4291186               | 0.32     | 117487                  | 0.33     |
| mmu-mir-124-2-3p  | 3893755            | 0.37     | 4285061               | 0.32     | 117335                  | 0.33     |
| mmu-mir-124-3-3p  | 3893509            | 0.37     | 4284930               | 0.32     | 117233                  | 0.33     |
| mmu-mir-125b-2-5p | 666991             | 0.15     | 2469844               | 0.15     | 8181152                 | 0.04     |
| mmu-mir-125b-1-5p | 661580             | 0.15     | 2394239               | 0.15     | 8167733                 | 0.04     |
| mmu-mir-29c-3p    | 637516             | 0.08     | 1595160               | 0.1      | 111606                  | 0.06     |
| mmu-mir-29b-1-3p  | 259153             | 0.21     | 1329299               | 0.19     | 857863                  | 0.04     |
| mmu-mir-29b-2-3p  | 233004             | 0.16     | 1215860               | 0.17     | 838940                  | 0.03     |
| mmu-mir-138-1-5p  | 534587             | 0.21     | 1196715               | 0.22     | 68656                   | 0.13     |
| mmu-mir-138-2-5p  | 497667             | 0.2      | 1110714               | 0.22     | 62373                   | 0.1      |
| mmu-mir-128-2-3p  | 804639             | 0.19     | 1071569               | 0.22     | 90359                   | 0.16     |
| mmu-mir-128-1-3p  | 836291             | 0.16     | 1071080               | 0.17     | 99528                   | 0.07     |
| mmu-mir-125a-5p   | 260015             | 0.15     | 1006888               | 0.13     | 3166860                 | 0.05     |
| mmu-mir-24-1-3p   | 123254             | 0.37     | 931011                | 0.33     | 5277609                 | 0.45     |
| mmu-mir-24-2-3p   | 123266             | 0.37     | 930980                | 0.33     | 5277661                 | 0.45     |
| mmu-mir-129-2-3p  | 104658             | 0.11     | 861730                | 0.12     | 71337                   | 0.07     |
| mmu-mir-26a-1-5p  | 267446             | 0.26     | 820770                | 0.28     | 645899                  | 0.12     |
| mmu-mir-26a-2-5p  | 267274             | 0.26     | 820404                | 0.28     | 645594                  | 0.12     |
| mmu-mir-218-1-5p  | 165271             | 0.23     | 788945                | 0.21     | 614343                  | 0.35     |
| mmu-mir-218-2-5p  | 161627             | 0.21     | 752572                | 0.17     | 412460                  | 0.05     |
| mmu-mir-9-1-5p    | 815667             | 0.23     | 729722                | 0.2      | 20249                   | 0.15     |
| mmu-mir-9-3-5p    | 815606             | 0.23     | 728973                | 0.2      | 20234                   | 0.15     |
| mmu-mir-9-2-5p    | 815679             | 0.23     | 728939                | 0.2      | 20240                   | 0.15     |
| mmu-mir-99a-5p    | 213094             | 0.28     | 693296                | 0.34     | 304205                  | 0.25     |
| mmu-mir-204-5p    | 96030              | 0.29     | 514684                | 0.33     | 31656                   | 0.11     |
| mmu-let-7g-5p     | 142224             | 0.23     | 393366                | 0.21     | 504613                  | 0.14     |
| mmu-mir-103-2-3p  | 86430              | 0.1      | 387470                | 0.12     | 1404216                 | 0.06     |
| mmu-mir-103-1-3p  | 86445              | 0.09     | 386760                | 0.12     | 1401197                 | 0.06     |
| mmu-mir-30c-2-5p  | 250149             | 0.13     | 384607                | 0.16     | 387089                  | 0.14     |
| mmu-mir-30c-1-5p  | 250071             | 0.13     | 384445                | 0.16     | 386913                  | 0.14     |
| mmu-mir-328-3p    | 53816              | 0.28     | 378162                | 0.29     | 174607                  | 0.28     |
| mmu-let-7f-2-5p   | 111349             | 0.19     | 357862                | 0.2      | 761454                  | 0.11     |
| mmu-mir-191-5p    | 70940              | 0.17     | 354715                | 0.18     | 831334                  | 0.15     |
| mmu-let-7f-1-5p   | 108808             | 0.19     | 344711                | 0.21     | 752585                  | 0.12     |
| mmu-let-7b-5p     | 241733             | 0.23     | 320471                | 0.27     | 175289                  | 0.26     |
| mmu-let-7c-2-5p   | 132891             | 0.24     | 274547                | 0.22     | 159131                  | 0.21     |



|                   |        |      |        |      |         |      |
|-------------------|--------|------|--------|------|---------|------|
| mmu-mir-145-5p    | 172208 | 0.19 | 274313 | 0.19 | 1755128 | 0.24 |
| mmu-let-7c-1-5p   | 129863 | 0.25 | 270354 | 0.23 | 158573  | 0.21 |
| mmu-mir-23b-3p    | 71644  | 0.31 | 245336 | 0.3  | 2045488 | 0.42 |
| mmu-let-7a-1-5p   | 108843 | 0.19 | 233671 | 0.2  | 278057  | 0.18 |
| mmu-let-7a-2-5p   | 107514 | 0.19 | 230699 | 0.21 | 276775  | 0.18 |
| mmu-mir-181a-2-5p | 134464 | 0.23 | 224870 | 0.24 | 229272  | 0.14 |
| mmu-mir-181a-1-5p | 134618 | 0.23 | 224827 | 0.24 | 229288  | 0.13 |
| mmu-mir-9-2-3p    | 20128  | 0.22 | 206080 | 0.21 | 5153    | 0.11 |
| mmu-mir-9-1-3p    | 20111  | 0.22 | 206011 | 0.21 | 5034    | 0.12 |
| mmu-mir-139-5p    | 129906 | 0.29 | 201533 | 0.3  | 22826   | 0.19 |
| mmu-mir-338-3p    | 84669  | 0.13 | 197816 | 0.16 | 2204    | 0.03 |
| mmu-mir-126-3p    | 67434  | 0.58 | 196785 | 0.52 | 34879   | 0.2  |
| mmu-mir-107-3p    | 62431  | 0.19 | 190725 | 0.16 | 158053  | 0.12 |
| mmu-mir-495-3p    | 55998  | 0.15 | 188425 | 0.18 | 113571  | 0.2  |
| mmu-mir-434-3p    | 152239 | 0.08 | 183263 | 0.07 | 81420   | 0.06 |
| mmu-mir-101a-3p   | 40580  | 0.18 | 173498 | 0.2  | 83452   | 0.17 |
| mmu-mir-23a-3p    | 75012  | 0.13 | 166668 | 0.16 | 2157584 | 0.1  |
| mmu-mir-149-5p    | 48938  | 0.15 | 164871 | 0.15 | 69398   | 0.16 |
| mmu-mir-7a-1-5p   | 31341  | 0.17 | 161340 | 0.14 | 285318  | 0.14 |
| mmu-mir-7a-2-5p   | 30900  | 0.17 | 158585 | 0.14 | 276701  | 0.15 |
| mmu-mir-30b-5p    | 104281 | 0.13 | 147368 | 0.16 | 140365  | 0.1  |
| mmu-mir-132-3p    | 156107 | 0.31 | 140848 | 0.33 | 19171   | 0.26 |
| mmu-mir-150-5p    | 27416  | 0.24 | 137168 | 0.31 | 402456  | 0.08 |
| mmu-mir-9-3-3p    | 15353  | 0.29 | 136874 | 0.32 | 11697   | 0.05 |
| mmu-mir-126-5p    | 95431  | 0.36 | 131348 | 0.39 | 20930   | 0.22 |
| mmu-mir-1249-3p   | 22496  | 0.18 | 128279 | 0.15 | 31410   | 0.09 |
| mmu-mir-135a-2-5p | 75126  | 0.09 | 125532 | 0.09 | 11593   | 0.03 |
| mmu-mir-135a-1-5p | 74981  | 0.09 | 125114 | 0.09 | 11565   | 0.03 |
| mmu-mir-100-5p    | 44009  | 0.19 | 119827 | 0.26 | 179677  | 0.26 |
| mmu-mir-487b-3p   | 119024 | 0.19 | 119182 | 0.21 | 45159   | 0.13 |
| mmu-mir-30d-5p    | 27788  | 0.28 | 114328 | 0.27 | 294267  | 0.14 |
| mmu-mir-342-3p    | 29713  | 0.24 | 113192 | 0.21 | 233826  | 0.11 |
| mmu-mir-92b-3p    | 32309  | 0.31 | 108820 | 0.3  | 337122  | 0.29 |
| mmu-let-7e-5p     | 32889  | 0.24 | 108121 | 0.25 | 36386   | 0.25 |
| mmu-mir-30e-5p    | 34779  | 0.35 | 106635 | 0.29 | 165892  | 0.15 |
| mmu-mir-30a-5p    | 32975  | 0.34 | 104697 | 0.28 | 196856  | 0.14 |
| mmu-mir-21-5p     | 30076  | 0.11 | 101212 | 0.07 | 4147912 | 0.1  |
| mmu-mir-127-3p    | 49607  | 0.21 | 98746  | 0.26 | 73828   | 0.27 |
| mmu-mir-222-3p    | 38213  | 0.3  | 90330  | 0.29 | 227401  | 0.31 |
| mmu-mir-484-5p    | 36236  | 0.3  | 85631  | 0.27 | 551843  | 0.2  |
| mmu-mir-34a-5p    | 23630  | 0.09 | 84253  | 0.11 | 1142234 | 0.07 |

|                   |       |      |       |      |         |      |
|-------------------|-------|------|-------|------|---------|------|
| mmu-mir-140-3p    | 14070 | 0.32 | 83857 | 0.25 | 517080  | 0.18 |
| mmu-mir-16-1-5p   | 24153 | 0.35 | 80381 | 0.41 | 540930  | 0.13 |
| mmu-mir-16-2-5p   | 23486 | 0.36 | 77569 | 0.42 | 537063  | 0.13 |
| mmu-mir-129-1-3p  | 20136 | 0.12 | 77494 | 0.13 | 5306    | 0.15 |
| mmu-mir-3102-3p   | 10917 | 0.34 | 75477 | 0.31 | 77242   | 0.43 |
| mmu-mir-551b-3p   | 22377 | 0.15 | 75312 | 0.17 | 16316   | 0.02 |
| mmu-let-7d-5p     | 24080 | 0.27 | 74229 | 0.23 | 89321   | 0.21 |
| mmu-mir-137-3p    | 22448 | 0.26 | 73984 | 0.26 | 1515    | 0.09 |
| mmu-mir-301a-3p   | 11042 | 0.14 | 72469 | 0.17 | 669848  | 0.22 |
| mmu-mir-541-5p    | 29198 | 0.17 | 67532 | 0.21 | 376986  | 0.17 |
| mmu-mir-130a-3p   | 41291 | 0.14 | 67330 | 0.12 | 1424974 | 0.14 |
| mmu-mir-376b-3p   | 33287 | 0.1  | 66701 | 0.1  | 30660   | 0.11 |
| mmu-mir-181b-1-5p | 19338 | 0.29 | 66542 | 0.28 | 85673   | 0.33 |
| mmu-mir-382-5p    | 37820 | 0.2  | 65144 | 0.22 | 69221   | 0.15 |
| mmu-let-7i-5p     | 74786 | 0.36 | 65067 | 0.25 | 81947   | 0.37 |
| mmu-mir-326-3p    | 10720 | 0.24 | 64103 | 0.3  | 26668   | 0.19 |
| mmu-mir-331-3p    | 10179 | 0.29 | 63759 | 0.26 | 61438   | 0.18 |
| mmu-mir-181b-2-5p | 22685 | 0.3  | 63553 | 0.32 | 93787   | 0.33 |
| mmu-mir-708-5p    | 25973 | 0.21 | 62851 | 0.21 | 104179  | 0.2  |
| mmu-mir-143-3p    | 74141 | 0.47 | 62362 | 0.5  | 344223  | 0.35 |
| mmu-mir-666-3p    | 16690 | 0.41 | 61222 | 0.46 | 129088  | 0.64 |
| mmu-mir-365-1-3p  | 9288  | 0.09 | 61217 | 0.08 | 126267  | 0.09 |
| mmu-mir-365-2-3p  | 9284  | 0.09 | 61212 | 0.08 | 126251  | 0.09 |
| mmu-mir-136-5p    | 35802 | 0.19 | 59680 | 0.18 | 42622   | 0.09 |
| mmu-mir-667-3p    | 12134 | 0.38 | 56720 | 0.34 | 75816   | 0.41 |
| mmu-mir-337-3p    | 47403 | 0.21 | 54793 | 0.21 | 104100  | 0.3  |
| mmu-mir-34c-5p    | 2830  | 0.18 | 54454 | 0.12 | 92852   | 0.08 |
| mmu-mir-27b-3p    | 50406 | 0.22 | 53687 | 0.27 | 340278  | 0.27 |
| mmu-mir-7a-1-3p   | 2467  | 0.22 | 53579 | 0.2  | 35751   | 0.11 |
| mmu-mir-598-3p    | 14533 | 0.16 | 52542 | 0.14 | 5428    | 0.09 |
| mmu-mir-409-3p    | 10857 | 0.25 | 51590 | 0.27 | 147717  | 0.22 |
| mmu-mir-330-3p    | 5100  | 0.25 | 51194 | 0.25 | 30668   | 0.19 |
| mmu-mir-361-5p    | 16195 | 0.23 | 50150 | 0.22 | 109856  | 0.2  |
| mmu-mir-219-2-3p  | 28874 | 0.11 | 49831 | 0.15 | 707     | 0.11 |
| mmu-mir-543-3p    | 19803 | 0.16 | 48867 | 0.2  | 60092   | 0.19 |
| mmu-mir-195-5p    | 9480  | 0.33 | 46561 | 0.38 | 22185   | 0.17 |
| mmu-mir-151-5p    | 18565 | 0.15 | 46545 | 0.29 | 207295  | 0.07 |
| mmu-mir-296-5p    | 15770 | 0.07 | 45940 | 0.11 | 178824  | 0.13 |
| mmu-mir-7b-5p     | 11298 | 0.17 | 44656 | 0.21 | 2462    | 0.1  |
| mmu-mir-668-3p    | 13274 | 0.23 | 44352 | 0.21 | 29263   | 0.11 |
| mmu-mir-212-3p    | 35110 | 0.33 | 43470 | 0.31 | 9927    | 0.32 |

|                  |       |      |       |      |         |      |
|------------------|-------|------|-------|------|---------|------|
| mmu-mir-26b-5p   | 12686 | 0.3  | 42483 | 0.24 | 108341  | 0.13 |
| mmu-mir-132-5p   | 23756 | 0.08 | 42090 | 0.1  | 8922    | 0.02 |
| mmu-mir-221-3p   | 29738 | 0.28 | 40554 | 0.21 | 443306  | 0.22 |
| mmu-mir-34b-5p   | 1516  | 0.06 | 40138 | 0.07 | 23241   | 0.04 |
| mmu-mir-378-3p   | 13807 | 0.33 | 39952 | 0.33 | 95440   | 0.22 |
| mmu-mir-1839-5p  | 10483 | 0.24 | 39917 | 0.27 | 18270   | 0.27 |
| mmu-mir-345-5p   | 11480 | 0.19 | 39501 | 0.2  | 99922   | 0.11 |
| mmu-mir-99b-5p   | 17597 | 0.28 | 38755 | 0.32 | 368869  | 0.23 |
| mmu-mir-185-5p   | 5836  | 0.29 | 38540 | 0.32 | 111421  | 0.23 |
| mmu-mir-22-5p    | 11255 | 0.15 | 38255 | 0.18 | 41518   | 0.13 |
| mmu-mir-193b-3p  | 15200 | 0.18 | 38209 | 0.19 | 83748   | 0.16 |
| mmu-mir-344-1-3p | 12157 | 0.22 | 38006 | 0.16 | 8748    | 0.23 |
| mmu-mir-344-2-3p | 12146 | 0.22 | 37987 | 0.16 | 8728    | 0.23 |
| mmu-mir-27a-3p   | 32147 | 0.29 | 37438 | 0.32 | 383103  | 0.34 |
| mmu-mir-34b-3p   | 1394  | 0.27 | 36326 | 0.27 | 77595   | 0.17 |
| mmu-mir-31-5p    | 7656  | 0.22 | 35928 | 0.26 | 625488  | 0.36 |
| mmu-mir-320-3p   | 7694  | 0.21 | 35876 | 0.16 | 56577   | 0.2  |
| mmu-mir-323-3p   | 18470 | 0.12 | 35701 | 0.28 | 39845   | 0.1  |
| mmu-mir-376a-3p  | 16934 | 0.15 | 35209 | 0.2  | 25837   | 0.1  |
| mmu-mir-329-3p   | 7699  | 0.16 | 35069 | 0.23 | 61855   | 0.14 |
| mmu-mir-19b-1-3p | 13689 | 0.21 | 34770 | 0.14 | 1744882 | 0.07 |
| mmu-mir-744-5p   | 5576  | 0.31 | 34493 | 0.33 | 121532  | 0.23 |
| mmu-mir-19b-2-3p | 13579 | 0.21 | 34395 | 0.14 | 1733393 | 0.07 |
| mmu-mir-136-3p   | 31353 | 0.11 | 34372 | 0.14 | 17543   | 0.1  |
| mmu-mir-106b-5p  | 9020  | 0.3  | 33269 | 0.35 | 255679  | 0.14 |
| mmu-mir-101b-3p  | 15350 | 0.24 | 33153 | 0.24 | 38354   | 0.27 |
| mmu-mir-664-3p   | 10050 | 0.4  | 32646 | 0.34 | 13103   | 0.32 |
| mmu-mir-582-5p   | 9029  | 0.14 | 32499 | 0.1  | 8927    | 0.07 |
| mmu-mir-872-3p   | 10153 | 0.18 | 31771 | 0.18 | 45060   | 0.13 |
| mmu-mir-382-3p   | 8992  | 0.14 | 31608 | 0.16 | 22880   | 0.14 |
| mmu-mir-187-3p   | 15524 | 0.48 | 31426 | 0.45 | 46093   | 0.41 |
| mmu-mir-17-5p    | 8255  | 0.36 | 30868 | 0.32 | 995681  | 0.18 |
| mmu-mir-154-5p   | 24239 | 0.34 | 30290 | 0.35 | 14920   | 0.35 |
| mmu-mir-384-3p   | 3708  | 0.1  | 30013 | 0.1  | 1515    | 0.09 |
| mmu-mir-181c-5p  | 20632 | 0.23 | 29676 | 0.21 | 66297   | 0.15 |
| mmu-mir-376c-3p  | 4616  | 0.06 | 28709 | 0.11 | 44409   | 0.07 |
| mmu-mir-346-5p   | 2819  | 0.23 | 27829 | 0.21 | 9857    | 0.03 |
| mmu-mir-369-3p   | 14227 | 0.2  | 27634 | 0.24 | 12128   | 0.13 |
| mmu-mir-434-5p   | 6907  | 0.13 | 27167 | 0.16 | 77848   | 0.02 |
| mmu-mir-341-3p   | 20933 | 0.22 | 26710 | 0.33 | 25919   | 0.44 |
| mmu-mir-93-5p    | 10124 | 0.21 | 26250 | 0.2  | 330253  | 0.2  |

|                  |       |      |       |      |         |      |
|------------------|-------|------|-------|------|---------|------|
| mmu-mir-92a-1-3p | 13537 | 0.26 | 26076 | 0.26 | 1875283 | 0.11 |
| mmu-let-7d-3p    | 14710 | 0.15 | 25877 | 0.18 | 91651   | 0.12 |
| mmu-mir-411-5p   | 13444 | 0.37 | 25745 | 0.32 | 31510   | 0.41 |
| mmu-mir-20a-5p   | 10290 | 0.25 | 25411 | 0.26 | 583742  | 0.14 |
| mmu-mir-497-5p   | 10854 | 0.13 | 25071 | 0.16 | 10413   | 0.17 |
| mmu-mir-300-3p   | 23458 | 0.4  | 24041 | 0.46 | 17747   | 0.32 |
| mmu-mir-532-5p   | 5521  | 0.17 | 23123 | 0.15 | 107979  | 0.09 |
| mmu-mir-211-5p   | 5853  | 0.21 | 23016 | 0.19 | 7612    | 0.04 |
| mmu-mir-383-5p   | 11882 | 0.26 | 22886 | 0.25 | 4372    | 0.04 |
| mmu-mir-124-2-5p | 4222  | 0.27 | 22735 | 0.15 | 6044    | 0.08 |
| mmu-mir-124-1-5p | 4216  | 0.27 | 22725 | 0.15 | 6002    | 0.08 |
| mmu-mir-124-3-5p | 4215  | 0.27 | 22708 | 0.15 | 5979    | 0.08 |
| mmu-mir-153-3p   | 8793  | 0.15 | 22706 | 0.17 | 2895    | 0.03 |
| mmu-mir-15a-5p   | 12026 | 0.12 | 22455 | 0.16 | 54961   | 0.2  |
| mmu-mir-335-5p   | 1474  | 0.19 | 22040 | 0.23 | 17554   | 0.19 |
| mmu-mir-369-5p   | 9273  | 0.11 | 21940 | 0.12 | 27259   | 0.04 |
| mmu-mir-1-2-3p   | 2497  | 0.15 | 21800 | 0.12 | 1104    | 0.07 |
| mmu-mir-582-3p   | 1146  | 0.13 | 21552 | 0.07 | 9670    | 0.04 |
| mmu-mir-29c-5p   | 5963  | 0.21 | 21347 | 0.18 | 7835    | 0.09 |
| mmu-mir-500-3p   | 10671 | 0.21 | 21241 | 0.23 | 32304   | 0.2  |
| mmu-mir-1-1-3p   | 2477  | 0.16 | 21081 | 0.13 | 1116    | 0.14 |
| mmu-mir-379-5p   | 3612  | 0.32 | 21016 | 0.38 | 96262   | 0.25 |
| mmu-mir-199b-5p  | 1900  | 0.14 | 21001 | 0.09 | 148604  | 0.11 |
| mmu-mir-384-5p   | 4567  | 0.12 | 20627 | 0.15 | 388     | 0.04 |
| mmu-mir-129-2-5p | 19972 | 0.19 | 20522 | 0.25 | 17787   | 0.17 |
| mmu-mir-129-1-5p | 19974 | 0.19 | 20502 | 0.25 | 17768   | 0.17 |
| mmu-mir-338-5p   | 4892  | 0.28 | 20215 | 0.24 | 925     | 0.13 |
| mmu-mir-322-3p   | 589   | 0.21 | 20191 | 0.12 | 10507   | 0.14 |
| mmu-mir-154-3p   | 9177  | 0.27 | 19969 | 0.19 | 37815   | 0.2  |
| mmu-mir-350-3p   | 3889  | 0.16 | 19894 | 0.13 | 43039   | 0.09 |
| mmu-mir-324-5p   | 2878  | 0.28 | 19656 | 0.42 | 33902   | 0.27 |
| mmu-mir-30e-3p   | 4182  | 0.35 | 19540 | 0.28 | 24055   | 0.53 |
| mmu-mir-340-3p   | 1753  | 0.2  | 19422 | 0.31 | 30879   | 0.21 |
| mmu-mir-29b-2-5p | 1415  | 0.15 | 19290 | 0.13 | 3540    | 0.07 |
| mmu-mir-674-3p   | 1693  | 0.12 | 18930 | 0.11 | 77173   | 0.06 |
| mmu-mir-544-3p   | 4835  | 0.51 | 18695 | 0.4  | 1435    | 0.29 |
| mmu-mir-223-3p   | 4261  | 0.48 | 18668 | 0.29 | 257297  | 0.19 |
| mmu-mir-20b-3p   | 38    | 0.23 | 18497 | 0.39 | 14742   | 0.14 |
| mmu-mir-362-5p   | 2550  | 0.25 | 18344 | 0.3  | 15033   | 0.2  |
| mmu-mir-411-3p   | 5088  | 0.34 | 18304 | 0.23 | 41084   | 0.32 |
| mmu-mir-433-3p   | 10861 | 0.27 | 18242 | 0.27 | 21835   | 0.15 |

|                   |       |      |       |      |        |      |
|-------------------|-------|------|-------|------|--------|------|
| mmu-let-7f-2-3p   | 4111  | 0.74 | 17955 | 0.16 | 5581   | 0.54 |
| mmu-mir-192-5p    | 2408  | 0.21 | 16961 | 0.2  | 52255  | 0.11 |
| mmu-mir-421-3p    | 1828  | 0.25 | 16607 | 0.22 | 152763 | 0.17 |
| mmu-mir-31-3p     | 3239  | 0.24 | 16574 | 0.21 | 55892  | 0.32 |
| mmu-mir-1298-5p   | 2293  | 0.32 | 16459 | 0.26 | 760    | 0.19 |
| mmu-mir-15b-5p    | 4086  | 0.17 | 16437 | 0.15 | 655020 | 0.04 |
| mmu-mir-20b-5p    | 223   | 0.25 | 16403 | 0.15 | 213630 | 0.12 |
| mmu-mir-574-3p    | 1535  | 0.25 | 16371 | 0.21 | 164563 | 0.16 |
| mmu-mir-7a-2-3p   | 2006  | 0.25 | 16297 | 0.26 | 621    | 0.17 |
| mmu-mir-22-3p     | 8435  | 0.18 | 15754 | 0.22 | 61407  | 0.29 |
| mmu-mir-381-3p    | 20549 | 0.12 | 15747 | 0.12 | 11063  | 0.1  |
| mmu-mir-425-5p    | 4510  | 0.31 | 15545 | 0.26 | 75335  | 0.09 |
| mmu-mir-494-3p    | 582   | 0.1  | 15396 | 0.15 | 58413  | 0.09 |
| mmu-mir-219-2-5p  | 5127  | 0.1  | 15353 | 0.12 | 379    | 0.08 |
| mmu-mir-186-5p    | 8138  | 0.16 | 15171 | 0.18 | 56074  | 0.13 |
| mmu-mir-361-3p    | 3951  | 0.12 | 15086 | 0.15 | 26675  | 0.07 |
| mmu-mir-339-5p    | 4609  | 0.29 | 14999 | 0.32 | 42645  | 0.24 |
| mmu-mir-337-5p    | 2610  | 0.21 | 14627 | 0.22 | 42351  | 0.1  |
| mmu-mir-463-5p    | 1     | 0    | 14578 | 0.11 | 6813   | 0.02 |
| mmu-mir-1839-3p   | 1540  | 0.19 | 13968 | 0.16 | 23461  | 0.1  |
| mmu-mir-34a-3p    | 1097  | 0.24 | 13925 | 0.15 | 49523  | 0.14 |
| mmu-mir-138-1-3p  | 1332  | 0.36 | 13889 | 0.3  | 6855   | 0.09 |
| mmu-mir-410-3p    | 4577  | 0.28 | 13558 | 0.37 | 9579   | 0.13 |
| mmu-mir-127-5p    | 2881  | 0.28 | 13483 | 0.27 | 9061   | 0.22 |
| mmu-mir-409-5p    | 3860  | 0.11 | 13368 | 0.11 | 12814  | 0.11 |
| mmu-mir-212-5p    | 7814  | 0.19 | 13271 | 0.19 | 3295   | 0.3  |
| mmu-mir-135b-5p   | 9985  | 0.12 | 12995 | 0.1  | 409713 | 0.03 |
| mmu-mir-30a-3p    | 8802  | 0.36 | 12897 | 0.28 | 15730  | 0.36 |
| mmu-mir-671-5p    | 660   | 0.43 | 12589 | 0.4  | 6948   | 0.45 |
| mmu-mir-224-5p    | 164   | 0.18 | 12576 | 0.16 | 10412  | 0.11 |
| mmu-mir-505-3p    | 266   | 0.1  | 12563 | 0.15 | 21282  | 0.17 |
| mmu-mir-425-3p    | 1474  | 0.31 | 12502 | 0.2  | 36295  | 0.11 |
| mmu-mir-743a-3p   | 3     | 0    | 12434 | 0.06 | 1785   | 0.04 |
| mmu-mir-210-3p    | 3418  | 0.19 | 12391 | 0.21 | 375224 | 0.13 |
| mmu-mir-469-5p    | 1     | 0    | 12296 | 0.15 | 9814   | 0.03 |
| mmu-mir-140-5p    | 1888  | 0.22 | 12245 | 0.15 | 22297  | 0.22 |
| mmu-mir-344d-3-3p | 1724  | 0.17 | 12234 | 0.16 | 9378   | 0.06 |
| mmu-mir-344d-1-3p | 1687  | 0.17 | 12190 | 0.16 | 9322   | 0.06 |
| mmu-mir-344d-2-3p | 1687  | 0.17 | 12178 | 0.16 | 9334   | 0.06 |
| mmu-mir-363-3p    | 98    | 0.47 | 11881 | 0.08 | 39177  | 0.44 |
| mmu-mir-340-5p    | 3268  | 0.27 | 11828 | 0.23 | 2212   | 0.19 |

|                   |        |      |       |      |        |      |
|-------------------|--------|------|-------|------|--------|------|
| mmu-mir-874-3p    | 914    | 0.21 | 11760 | 0.18 | 7430   | 0.07 |
| mmu-mir-203-3p    | 1495   | 0.3  | 11572 | 0.19 | 6593   | 0.09 |
| mmu-mir-376b-5p   | 8543   | 0.1  | 11503 | 0.13 | 11150  | 0.04 |
| mmu-mir-764-5p    | 411    | 0.19 | 11362 | 0.13 | 10470  | 0.01 |
| mmu-mir-665-3p    | 2693   | 0.24 | 11247 | 0.2  | 28663  | 0.23 |
| mmu-mir-496-3p    | 3540   | 0.13 | 11189 | 0.17 | 12213  | 0.15 |
| mmu-mir-670-5p    | 212    | 0.2  | 11159 | 0.13 | 6000   | 0.26 |
| mmu-mir-451-5p    | 9204   | 0.18 | 11000 | 0.18 | 3969   | 0.04 |
| mmu-mir-370-3p    | 3384   | 0.33 | 10968 | 0.29 | 33455  | 0.18 |
| mmu-mir-92a-2-3p  | 4736   | 0.36 | 10930 | 0.31 | 558314 | 0.23 |
| mmu-mir-485-3p    | 3474   | 0.16 | 10792 | 0.18 | 31633  | 0.16 |
| mmu-mir-362-3p    | 2071   | 0.16 | 10760 | 0.13 | 11487  | 0.09 |
| mmu-mir-146a-5p   | 2818   | 0.49 | 10616 | 0.37 | 22230  | 0.29 |
| mmu-mir-872-5p    | 4082   | 0.12 | 10537 | 0.19 | 13501  | 0.12 |
| mmu-mir-652-3p    | 8812   | 0.4  | 10436 | 0.42 | 62358  | 0.26 |
| mmu-mir-219-1-5p  | 3053   | 0.15 | 10137 | 0.15 | 1557   | 0.05 |
| mmu-mir-873-5p    | 6673   | 0.2  | 9769  | 0.23 | 755    | 0.23 |
| mmu-mir-181a-1-3p | 4711   | 0.1  | 9737  | 0.11 | 15941  | 0.03 |
| mmu-mir-877-3p    | 1811   | 0.44 | 9704  | 0.37 | 61024  | 0.43 |
| mmu-mir-99a-3p    | 3232   | 0.24 | 9536  | 0.26 | 4522   | 0.19 |
| mmu-mir-130b-5p   | 356    | 0.21 | 9136  | 0.14 | 91031  | 0.08 |
| mmu-mir-702-3p    | 1441   | 0.35 | 9086  | 0.33 | 54468  | 0.52 |
| mmu-mir-146b-5p   | 1757   | 0.2  | 9020  | 0.15 | 7687   | 0.16 |
| mmu-mir-1927-3p   | 26     | 0.42 | 8830  | 0.11 | 8418   | 0.05 |
| mmu-mir-489-3p    | 58     | 0.18 | 8774  | 0.2  | 2659   | 0.04 |
| mmu-mir-761-5p    | 1      | 0    | 8741  | 0.16 | 6355   | 0.01 |
| mmu-mir-770-3p    | 1486   | 0.28 | 8666  | 0.24 | 3148   | 0.19 |
| mmu-mir-1-2-5p    | 5      | 0    | 8604  | 0.1  | 10555  | 0.02 |
| mmu-mir-501-5p    | 982    | 0.28 | 8601  | 0.31 | 8149   | 0.31 |
| mmu-mir-200a-3p   | 127839 | 0.27 | 8534  | 0.21 | 60511  | 0.17 |
| mmu-mir-24-2-5p   | 1067   | 0.17 | 8458  | 0.12 | 93533  | 0.05 |
| mmu-mir-1274a-5p  | 321    | 0.47 | 8447  | 0.19 | 78659  | 0.14 |
| mmu-mir-25-3p     | 4910   | 0.19 | 8373  | 0.22 | 327669 | 0.12 |
| mmu-mir-34c-3p    | 153    | 0.34 | 8364  | 0.32 | 32336  | 0.41 |
| mmu-mir-672-5p    | 2324   | 0.23 | 8297  | 0.16 | 28481  | 0.21 |
| mmu-mir-125b-2-3p | 1970   | 0.37 | 8137  | 0.37 | 3603   | 0.17 |
| mmu-mir-455-3p    | 778    | 0.21 | 8132  | 0.23 | 14060  | 0.29 |
| mmu-mir-19a-3p    | 1261   | 0.23 | 8114  | 0.08 | 404459 | 0.08 |
| mmu-mir-134-5p    | 1292   | 0.25 | 8105  | 0.36 | 83228  | 0.28 |
| mmu-mir-676-3p    | 2608   | 0.36 | 8101  | 0.27 | 15208  | 0.2  |
| mmu-mir-351-5p    | 895    | 0.46 | 8078  | 0.44 | 76228  | 0.58 |

|                   |       |      |      |      |         |      |
|-------------------|-------|------|------|------|---------|------|
| mmu-mir-802-5p    | 18    | 0.05 | 8016 | 0.1  | 4689    | 0.02 |
| mmu-mir-379-3p    | 1974  | 0.26 | 7945 | 0.19 | 10740   | 0.26 |
| mmu-mir-33-3p     | 2705  | 0.13 | 7926 | 0.14 | 8118    | 0.11 |
| mmu-mir-301b-3p   | 271   | 0.18 | 7813 | 0.12 | 77360   | 0.37 |
| mmu-let-7b-3p     | 1612  | 0.57 | 7779 | 0.44 | 8399    | 0.57 |
| mmu-mir-98-5p     | 4599  | 0.15 | 7732 | 0.17 | 46135   | 0.07 |
| mmu-mir-196b-3p   | 13    | 0.15 | 7715 | 0.15 | 4305    | 0.04 |
| mmu-mir-700-3p    | 976   | 0.38 | 7496 | 0.24 | 16832   | 0.27 |
| mmu-mir-181d-5p   | 3038  | 0.38 | 7465 | 0.35 | 38586   | 0.21 |
| mmu-mir-325-5p    | 451   | 0.17 | 7443 | 0.12 | 6910    | 0.01 |
| mmu-mir-375-3p    | 638   | 0.31 | 7419 | 0.25 | 1800    | 0.21 |
| mmu-mir-532-3p    | 2007  | 0.24 | 7187 | 0.28 | 12276   | 0.21 |
| mmu-mir-133a-1-5p | 10    | 0.1  | 7173 | 0.07 | 5188    | 0.01 |
| mmu-mir-133a-2-5p | 12    | 0.08 | 7161 | 0.07 | 5223    | 0.01 |
| mmu-mir-380-3p    | 5190  | 0.15 | 7033 | 0.14 | 10663   | 0.07 |
| mmu-mir-138-2-3p  | 1318  | 0.5  | 7030 | 0.47 | 2598    | 0.15 |
| mmu-mir-1899-5p   | 4     | 0.25 | 7010 | 0.13 | 2991    | 0.05 |
| mmu-mir-700-5p    | 3093  | 0.22 | 6936 | 0.2  | 6498    | 0.3  |
| mmu-mir-488-5p    | 57    | 0.26 | 6919 | 0.13 | 11816   | 0.03 |
| mmu-mir-503-5p    | 194   | 0.3  | 6839 | 0.13 | 6737    | 0.11 |
| mmu-mir-223-5p    | 21    | 0.14 | 6837 | 0.13 | 3342    | 0.05 |
| mmu-mir-182-5p    | 25935 | 0.19 | 6818 | 0.32 | 1080391 | 0.12 |
| mmu-mir-106a-5p   | 100   | 0.37 | 6791 | 0.18 | 97353   | 0.29 |
| mmu-let-7i-3p     | 3230  | 0.19 | 6762 | 0.18 | 9095    | 0.15 |
| mmu-mir-374-3p    | 37    | 0.13 | 6715 | 0.14 | 10862   | 0.02 |
| mmu-mir-18a-5p    | 1942  | 0.19 | 6694 | 0.2  | 421361  | 0.11 |
| mmu-mir-29b-1-5p  | 567   | 0.19 | 6633 | 0.13 | 16611   | 0.05 |
| mmu-mir-330-5p    | 1550  | 0.29 | 6538 | 0.26 | 1515    | 0.22 |
| mmu-mir-676-5p    | 459   | 0.14 | 6497 | 0.11 | 12725   | 0.04 |
| mmu-mir-542-5p    | 114   | 0.26 | 6489 | 0.28 | 7155    | 0.05 |
| mmu-mir-329-5p    | 2416  | 0.16 | 6487 | 0.17 | 6355    | 0.19 |
| mmu-mir-17-3p     | 231   | 0.32 | 6342 | 0.15 | 85194   | 0.12 |
| mmu-mir-708-3p    | 1641  | 0.13 | 6295 | 0.11 | 5619    | 0.05 |
| mmu-mir-190-5p    | 4091  | 0.29 | 6178 | 0.2  | 4174    | 0.12 |
| mmu-mir-1264-3p   | 411   | 0.1  | 6176 | 0.09 | 1275    | 0    |
| mmu-mir-322-5p    | 2682  | 0.27 | 6131 | 0.25 | 131249  | 0.06 |
| mmu-let-7c-1-3p   | 107   | 0.11 | 6056 | 0.07 | 3495    | 0.06 |
| mmu-mir-721-3p    | 820   | 0.47 | 6024 | 0.25 | 55537   | 0.06 |
| mmu-mir-29a-5p    | 2512  | 0.14 | 5960 | 0.15 | 7097    | 0.08 |
| mmu-mir-1946a-5p  | 18    | 0.16 | 5957 | 0.2  | 5913    | 0.1  |
| mmu-mir-200b-3p   | 25155 | 0.15 | 5943 | 0.13 | 23741   | 0.16 |

|                   |       |      |      |      |         |      |
|-------------------|-------|------|------|------|---------|------|
| mmu-mir-135a-2-3p | 179   | 0.27 | 5854 | 0.17 | 1122    | 0.06 |
| mmu-mir-193-3p    | 1236  | 0.26 | 5853 | 0.31 | 12836   | 0.21 |
| mmu-mir-770-5p    | 1762  | 0.31 | 5799 | 0.3  | 1172    | 0.2  |
| mmu-mir-214-3p    | 88    | 0.32 | 5795 | 0.24 | 1996308 | 0.37 |
| mmu-mir-151-3p    | 1095  | 0.33 | 5768 | 0.35 | 20115   | 0.38 |
| mmu-mir-574-5p    | 526   | 0.2  | 5747 | 0.17 | 46342   | 0.18 |
| mmu-mir-423-3p    | 1034  | 0.32 | 5711 | 0.3  | 92205   | 0.23 |
| mmu-mir-429-3p    | 51526 | 0.3  | 5675 | 0.19 | 25537   | 0.19 |
| mmu-mir-764-3p    | 181   | 0.12 | 5662 | 0.05 | 1507    | 0.04 |
| mmu-mir-744-3p    | 178   | 0.24 | 5613 | 0.16 | 10328   | 0.14 |
| mmu-mir-542-3p    | 151   | 0.11 | 5594 | 0.09 | 7850    | 0.08 |
| mmu-mir-380-5p    | 160   | 0.27 | 5571 | 0.24 | 2675    | 0.09 |
| mmu-mir-183-3p    | 681   | 0.15 | 5563 | 0.13 | 32986   | 0.15 |
| mmu-let-7f-1-3p   | 944   | 0.56 | 5557 | 0.26 | 14311   | 0.64 |
| mmu-mir-33-5p     | 9326  | 0.15 | 5529 | 0.06 | 6431    | 0.07 |
| mmu-mir-378-5p    | 2698  | 0.2  | 5486 | 0.17 | 22978   | 0.16 |
| mmu-mir-615-3p    | 19    | 0.26 | 5456 | 0.11 | 41769   | 0.25 |
| mmu-mir-93-3p     | 834   | 0.26 | 5436 | 0.16 | 35292   | 0.16 |
| mmu-mir-431-3p    | 1635  | 0.22 | 5416 | 0.19 | 4158    | 0.2  |
| mmu-mir-3072-3p   | 2087  | 0.07 | 5363 | 0.09 | 9336    | 0.06 |
| mmu-mir-878-3p    | 27    | 0.03 | 5335 | 0.11 | 3989    | 0.06 |
| mmu-mir-653-5p    | 4     | 0    | 5318 | 0.11 | 2238    | 0.02 |
| mmu-mir-221-5p    | 415   | 0.13 | 5306 | 0.15 | 7116    | 0.1  |
| mmu-mir-448-3p    | 371   | 0.36 | 5304 | 0.3  | 2071    | 0.03 |
| mmu-mir-152-3p    | 1344  | 0.39 | 5285 | 0.36 | 59658   | 0.36 |
| mmu-mir-344b-3p   | 674   | 0.15 | 5260 | 0.15 | 1207    | 0.11 |
| mmu-mir-335-3p    | 1187  | 0.15 | 5241 | 0.14 | 18681   | 0.11 |
| mmu-mir-18a-3p    | 29    | 0.13 | 5239 | 0.09 | 14075   | 0.24 |
| mmu-mir-3068-3p   | 879   | 0.15 | 5230 | 0.13 | 5746    | 0.1  |
| mmu-mir-742-3p    | 11    | 0    | 5192 | 0.06 | 1681    | 0.05 |
| mmu-mir-181c-3p   | 1414  | 0.25 | 5030 | 0.26 | 20022   | 0.12 |
| mmu-mir-760-3p    | 586   | 0.3  | 4984 | 0.35 | 1962    | 0.3  |
| mmu-mir-144-5p    | 434   | 0.11 | 4950 | 0.09 | 674     | 0.12 |
| mmu-mir-592-5p    | 843   | 0.16 | 4936 | 0.19 | 1616    | 0.1  |
| mmu-mir-720-3p    | 156   | 0.41 | 4934 | 0.26 | 36186   | 0.19 |
| mmu-let-7e-3p     | 960   | 0.12 | 4918 | 0.12 | 5851    | 0.28 |
| mmu-mir-1191-3p   | 473   | 0.67 | 4900 | 0.31 | 16973   | 0.31 |
| mmu-mir-218-2-3p  | 586   | 0.38 | 4855 | 0.36 | 1717    | 0.13 |
| mmu-mir-703-5p    | 2     | 0.5  | 4843 | 0.08 | 429     | 0.11 |
| mmu-mir-148a-3p   | 2412  | 0.1  | 4752 | 0.14 | 66681   | 0.06 |
| mmu-mir-199a-2-5p | 1702  | 0.29 | 4712 | 0.2  | 657622  | 0.22 |



|                   |       |      |      |      |        |      |
|-------------------|-------|------|------|------|--------|------|
| mmu-mir-412-3p    | 450   | 0.4  | 4709 | 0.34 | 16628  | 0.05 |
| mmu-mir-3068-5p   | 964   | 0.11 | 4709 | 0.12 | 2595   | 0.07 |
| mmu-mir-187-5p    | 420   | 0.37 | 4690 | 0.31 | 5285   | 0.27 |
| mmu-mir-199a-1-5p | 1694  | 0.29 | 4665 | 0.2  | 657229 | 0.22 |
| mmu-mir-674-5p    | 2369  | 0.26 | 4658 | 0.28 | 51397  | 0.21 |
| mmu-mir-15b-3p    | 368   | 0.21 | 4643 | 0.12 | 29656  | 0.21 |
| mmu-mir-217-5p    | 22    | 0.36 | 4628 | 0.18 | 5675   | 0.03 |
| mmu-mir-99b-3p    | 1789  | 0.39 | 4598 | 0.37 | 57081  | 0.32 |
| mmu-mir-743b-3p   | 6     | 0.16 | 4589 | 0.08 | 522    | 0.04 |
| mmu-mir-669h-5p   | 20    | 0.3  | 4571 | 0.14 | 6216   | 0.07 |
| mmu-mir-1843-3p   | 729   | 0.14 | 4457 | 0.13 | 1762   | 0.08 |
| mmu-mir-215-5p    | 19    | 0.15 | 4415 | 0.09 | 7401   | 0.03 |
| mmu-mir-343-3p    | 2     | 0    | 4408 | 0.27 | 1363   | 0.02 |
| mmu-mir-511-5p    | 13    | 0.38 | 4402 | 0.11 | 1360   | 0.04 |
| mmu-mir-299-5p    | 1387  | 0.08 | 4391 | 0.11 | 36531  | 0.07 |
| mmu-mir-485-5p    | 209   | 0.25 | 4263 | 0.19 | 707    | 0.12 |
| mmu-mir-148b-3p   | 1576  | 0.19 | 4237 | 0.18 | 23591  | 0.29 |
| mmu-mir-449c-5p   | 20    | 0.3  | 4216 | 0.12 | 869    | 0.08 |
| mmu-mir-302a-5p   | 3     | 0    | 4200 | 0.08 | 36739  | 0.11 |
| mmu-mir-195-3p    | 161   | 0.35 | 4199 | 0.09 | 2198   | 0.05 |
| mmu-mir-431-5p    | 989   | 0.25 | 4184 | 0.23 | 23692  | 0.17 |
| mmu-mir-539-5p    | 1266  | 0.22 | 4150 | 0.17 | 14763  | 0.08 |
| mmu-let-7g-3p     | 1267  | 0.51 | 4135 | 0.4  | 2541   | 0.42 |
| mmu-mir-1198-5p   | 884   | 0.37 | 4081 | 0.37 | 6031   | 0.4  |
| mmu-mir-10b-5p    | 158   | 0.09 | 4011 | 0.14 | 312655 | 0.09 |
| mmu-mir-467e-5p   | 541   | 0.13 | 4000 | 0.14 | 25291  | 0.22 |
| mmu-mir-192-3p    | 35    | 0.22 | 3989 | 0.16 | 3427   | 0.07 |
| mmu-mir-142-5p    | 610   | 0.13 | 3981 | 0.17 | 41119  | 0.08 |
| mmu-mir-376a-5p   | 1175  | 0.15 | 3926 | 0.18 | 7047   | 0.04 |
| mmu-mir-501-3p    | 800   | 0.22 | 3893 | 0.25 | 10940  | 0.11 |
| mmu-mir-327-5p    | 2     | 0.5  | 3846 | 0.16 | 466    | 0.11 |
| mmu-mir-695-5p    | 1     | 0    | 3808 | 0.27 | 2228   | 0.07 |
| mmu-mir-1192-5p   | 12    | 0    | 3781 | 0.15 | 839    | 0.03 |
| mmu-mir-1983-3p   | 2038  | 0.26 | 3775 | 0.3  | 98225  | 0.22 |
| mmu-mir-671-3p    | 439   | 0.28 | 3749 | 0.32 | 4477   | 0.31 |
| mmu-mir-183-5p    | 17252 | 0.17 | 3698 | 0.16 | 620372 | 0.14 |
| mmu-mir-468-3p    | 12    | 0.33 | 3661 | 0.11 | 5075   | 0.06 |
| mmu-mir-370-5p    | 704   | 0.24 | 3653 | 0.28 | 785    | 0.21 |
| mmu-mir-294-5p    | 2     | 0.5  | 3638 | 0.18 | 210038 | 0.1  |
| mmu-mir-106b-3p   | 2092  | 0.19 | 3634 | 0.2  | 45270  | 0.21 |
| mmu-mir-1933-3p   | 18    | 0.05 | 3634 | 0.06 | 3939   | 0.02 |

|                  |      |      |      |      |         |      |
|------------------|------|------|------|------|---------|------|
| mmu-mir-374-5p   | 47   | 0.25 | 3616 | 0.28 | 61088   | 0.2  |
| mmu-mir-1950-5p  | 1    | 0    | 3591 | 0.12 | 2781    | 0.28 |
| mmu-mir-544-5p   | 1627 | 0.07 | 3533 | 0.09 | 41      | 0.04 |
| mmu-mir-302c-5p  | 3    | 0    | 3525 | 0.21 | 13943   | 0.07 |
| mmu-mir-3099-3p  | 792  | 0.28 | 3460 | 0.31 | 188     | 0.18 |
| mmu-mir-148b-5p  | 41   | 0.24 | 3430 | 0.17 | 2567    | 0.09 |
| mmu-mir-1843-5p  | 1374 | 0.23 | 3372 | 0.26 | 1206    | 0.19 |
| mmu-mir-219-1-3p | 19   | 0.36 | 3367 | 0.14 | 1882    | 0.05 |
| mmu-mir-290-5p   | 3    | 0    | 3366 | 0.21 | 3059938 | 0.19 |
| mmu-mir-28-3p    | 113  | 0.21 | 3363 | 0.29 | 8742    | 0.34 |
| mmu-mir-690-3p   | 933  | 0.12 | 3362 | 0.07 | 4073    | 0.06 |
| mmu-mir-324-3p   | 2201 | 0.31 | 3360 | 0.24 | 10310   | 0.34 |
| mmu-mir-874-5p   | 282  | 0.19 | 3275 | 0.17 | 202     | 0.14 |
| mmu-mir-452-5p   | 4    | 0    | 3264 | 0.13 | 1858    | 0.06 |
| mmu-mir-682-3p   | 22   | 0.22 | 3250 | 0.15 | 1059    | 0.11 |
| mmu-mir-1965-3p  | 17   | 0.35 | 3249 | 0.08 | 227921  | 0.24 |
| mmu-mir-188-5p   | 684  | 0.37 | 3235 | 0.36 | 17585   | 0.23 |
| mmu-mir-19b-1-5p | 71   | 0.26 | 3216 | 0.34 | 14272   | 0.12 |
| mmu-mir-687-5p   | 4    | 0.25 | 3201 | 0.19 | 7405    | 0.05 |
| mmu-mir-490-3p   | 993  | 0.17 | 3197 | 0.1  | 243     | 0.16 |
| mmu-mir-1956-5p  | 2    | 0    | 3191 | 0.25 | 6062    | 0.02 |
| mmu-mir-202-5p   | 52   | 0.19 | 3185 | 0.13 | 2064    | 0.03 |
| mmu-mir-758-3p   | 196  | 0.13 | 3158 | 0.12 | 3682    | 0.09 |
| mmu-mir-20a-3p   | 48   | 0.18 | 3145 | 0.45 | 19228   | 0.25 |
| mmu-mir-767-5p   | 1    | 1    | 3134 | 0.22 | 5897    | 0.1  |
| mmu-mir-291b-5p  | 5    | 0    | 3112 | 0.17 | 45432   | 0.21 |
| mmu-mir-449a-5p  | 243  | 0.35 | 3081 | 0.29 | 1913    | 0.22 |
| mmu-mir-1931-3p  | 18   | 0.22 | 3031 | 0.26 | 3658    | 0.17 |
| mmu-mir-704-3p   | 9    | 0.11 | 3026 | 0.15 | 2652    | 0.11 |
| mmu-mir-3085-3p  | 1173 | 0.44 | 3022 | 0.46 | 194     | 0.34 |
| mmu-mir-743b-5p  | 29   | 0.03 | 3003 | 0.14 | 1509    | 0.03 |
| mmu-mir-302d-3p  | 5    | 0    | 2996 | 0.13 | 359123  | 0.06 |
| mmu-mir-448-5p   | 225  | 0.27 | 2991 | 0.32 | 50      | 0.22 |
| mmu-mir-483-5p   | 29   | 0.2  | 2977 | 0.24 | 5925    | 0.16 |
| mmu-mir-200c-3p  | 3159 | 0.28 | 2914 | 0.15 | 3161    | 0.28 |
| mmu-mir-464-3p   | 1    | 0    | 2888 | 0.11 | 1240    | 0.05 |
| mmu-mir-697-3p   | 3    | 0.66 | 2876 | 0.22 | 5286    | 0.05 |
| mmu-mir-28-5p    | 176  | 0.14 | 2870 | 0.23 | 10198   | 0.23 |
| mmu-mir-707-5p   | 1    | 0    | 2857 | 0.29 | 12271   | 0.05 |
| mmu-mir-497-3p   | 497  | 0.24 | 2839 | 0.08 | 604     | 0.15 |
| mmu-mir-1955-5p  | 18   | 0.33 | 2832 | 0.15 | 3121    | 0.11 |

|                   |      |      |      |      |         |      |
|-------------------|------|------|------|------|---------|------|
| mmu-mir-377-5p    | 115  | 0.13 | 2808 | 0.19 | 578     | 0.1  |
| mmu-mir-677-5p    | 21   | 0    | 2753 | 0.15 | 1298    | 0.1  |
| mmu-mir-196a-1-5p | 27   | 0.11 | 2750 | 0.11 | 62803   | 0.11 |
| mmu-mir-293-3p    | 11   | 0.18 | 2711 | 0.12 | 4718248 | 0.04 |
| mmu-mir-196a-2-5p | 23   | 0.13 | 2679 | 0.11 | 60027   | 0.05 |
| mmu-mir-122-5p    | 101  | 0.3  | 2659 | 0.18 | 16087   | 0.05 |
| mmu-mir-883b-5p   | 2    | 0    | 2644 | 0.15 | 862     | 0.08 |
| mmu-mir-540-3p    | 265  | 0.23 | 2636 | 0.22 | 8035    | 0.2  |
| mmu-mir-883a-3p   | 6    | 0    | 2633 | 0.08 | 425     | 0.04 |
| mmu-mir-302d-5p   | 3    | 0    | 2608 | 0.26 | 14555   | 0.13 |
| mmu-mir-669g-5p   | 41   | 0.82 | 2606 | 0.15 | 3146    | 0.06 |
| mmu-mir-500-5p    | 210  | 0.28 | 2602 | 0.68 | 2048    | 0.57 |
| mmu-mir-298-5p    | 533  | 0.21 | 2601 | 0.18 | 101264  | 0.29 |
| mmu-mir-452-3p    | 7    | 0.14 | 2588 | 0.04 | 546     | 0.29 |
| mmu-mir-741-3p    | 10   | 0.1  | 2544 | 0.09 | 1634    | 0.1  |
| mmu-mir-96-3p     | 89   | 0.12 | 2523 | 0.09 | 9199    | 0.07 |
| mmu-mir-1981-5p   | 576  | 0.26 | 2483 | 0.34 | 1860    | 0.28 |
| mmu-mir-1193-3p   | 510  | 0.31 | 2478 | 0.29 | 30874   | 0.24 |
| mmu-mir-181a-2-3p | 264  | 0.28 | 2449 | 0.14 | 8319    | 0.08 |
| mmu-mir-107-5p    | 1156 | 0.2  | 2447 | 0.25 | 628     | 0.32 |
| mmu-mir-1963-5p   | 3    | 0    | 2437 | 0.13 | 2895    | 0.11 |
| mmu-mir-7b-3p     | 84   | 0.19 | 2430 | 0.21 | 170     | 0.13 |
| mmu-mir-130b-3p   | 484  | 0.33 | 2429 | 0.2  | 1922896 | 0.05 |
| mmu-mir-190-3p    | 427  | 0.13 | 2426 | 0.15 | 1150    | 0.14 |
| mmu-mir-122-3p    | 4    | 0.25 | 2367 | 0.12 | 888     | 0.04 |
| mmu-mir-684-1-3p  | 51   | 0.35 | 2353 | 0.08 | 2209    | 0.08 |
| mmu-mir-139-3p    | 391  | 0.32 | 2344 | 0.4  | 466     | 0.07 |
| mmu-mir-483-3p    | 196  | 0.12 | 2307 | 0.18 | 16311   | 0.16 |
| mmu-mir-125a-3p   | 401  | 0.28 | 2301 | 0.33 | 5762    | 0.26 |
| mmu-mir-701-5p    | 25   | 0.32 | 2289 | 0.26 | 1232    | 0.08 |
| mmu-mir-2145-2-5p | 184  | 0.15 | 2284 | 0.25 | 5744    | 0.09 |
| mmu-mir-433-5p    | 903  | 0.19 | 2274 | 0.15 | 1839    | 0.06 |
| mmu-mir-450a-1-5p | 351  | 0.15 | 2271 | 0.1  | 3044    | 0.15 |
| mmu-mir-450a-2-5p | 352  | 0.15 | 2270 | 0.11 | 3044    | 0.15 |
| mmu-mir-710-5p    | 7    | 0    | 2270 | 0.1  | 4611    | 0.03 |
| mmu-mir-147-3p    | 50   | 0.28 | 2265 | 0.08 | 1816    | 0.18 |
| mmu-mir-759-5p    | 8    | 0.12 | 2261 | 0.2  | 2321    | 0.03 |
| mmu-mir-325-3p    | 344  | 0.2  | 2260 | 0.15 | 2486    | 0.01 |
| mmu-mir-205-5p    | 478  | 0.16 | 2250 | 0.14 | 568082  | 0.19 |
| mmu-mir-26b-3p    | 151  | 0.28 | 2204 | 0.22 | 6240    | 0.08 |
| mmu-mir-148a-5p   | 28   | 0.14 | 2162 | 0.22 | 1148    | 0.14 |

|                   |     |      |      |      |         |      |
|-------------------|-----|------|------|------|---------|------|
| mmu-mir-293-5p    | 2   | 0    | 2131 | 0.15 | 99276   | 0.13 |
| mmu-mir-698-3p    | 4   | 0    | 2109 | 0.11 | 4168    | 0.01 |
| mmu-mir-678-3p    | 4   | 0    | 2094 | 0.35 | 652     | 0.05 |
| mmu-mir-92a-2-5p  | 1   | 0    | 2094 | 0.13 | 3756    | 0.07 |
| mmu-mir-1949-3p   | 10  | 0    | 2091 | 0.15 | 8294    | 0.03 |
| mmu-mir-1897-3p   | 9   | 0    | 2085 | 0.17 | 1905    | 0.02 |
| mmu-mir-1247-5p   | 362 | 0.43 | 2051 | 0.34 | 1769    | 0.25 |
| mmu-mir-684-2-3p  | 9   | 0    | 2036 | 0.06 | 1761    | 0.01 |
| mmu-mir-206-3p    | 111 | 0.12 | 2028 | 0.16 | 5380    | 0.34 |
| mmu-mir-207-3p    | 19  | 0.15 | 2026 | 0.47 | 10346   | 0.42 |
| mmu-mir-455-5p    | 175 | 0.13 | 2023 | 0.24 | 2137    | 0.07 |
| mmu-mir-2145-1-3p | 27  | 0.07 | 2016 | 0.26 | 2400    | 0.03 |
| mmu-mir-466g-3p   | 30  | 0.36 | 1997 | 0.11 | 12996   | 0.6  |
| mmu-mir-218-1-3p  | 85  | 0.22 | 1995 | 0.14 | 1306    | 0.12 |
| mmu-mir-505-5p    | 313 | 0.22 | 1993 | 0.13 | 4259    | 0.1  |
| mmu-mir-504-5p    | 207 | 0.14 | 1985 | 0.19 | 6216    | 0.12 |
| mmu-mir-134-3p    | 328 | 0.25 | 1982 | 0.22 | 2968    | 0.23 |
| mmu-mir-342-5p    | 472 | 0.21 | 1967 | 0.22 | 4355    | 0.22 |
| mmu-mir-377-3p    | 541 | 0.2  | 1964 | 0.28 | 2348    | 0.26 |
| mmu-mir-421-5p    | 23  | 0.21 | 1958 | 0.07 | 3541    | 0.03 |
| mmu-mir-101a-5p   | 366 | 0.16 | 1888 | 0.08 | 2065    | 0.06 |
| mmu-mir-1224-5p   | 254 | 0.33 | 1878 | 0.31 | 3634    | 0.13 |
| mmu-mir-491-3p    | 66  | 0.06 | 1877 | 0.11 | 1320    | 0.08 |
| mmu-mir-133b-3p   | 169 | 0.2  | 1877 | 0.09 | 1213    | 0.04 |
| mmu-mir-222-5p    | 135 | 0.23 | 1875 | 0.11 | 11881   | 0.04 |
| mmu-mir-666-5p    | 464 | 0.31 | 1874 | 0.36 | 5928    | 0.39 |
| mmu-mir-453-3p    | 6   | 0    | 1870 | 0.15 | 1671    | 0.02 |
| mmu-mir-130a-5p   | 258 | 0.12 | 1865 | 0.23 | 26960   | 0.13 |
| mmu-mir-292-3p    | 6   | 0.16 | 1862 | 0.09 | 1511432 | 0.09 |
| mmu-mir-299-3p    | 311 | 0.25 | 1851 | 0.28 | 7063    | 0.19 |
| mmu-mir-1982-3p   | 123 | 0.33 | 1843 | 0.32 | 6304    | 0.15 |
| mmu-mir-713-3p    | 5   | 0.2  | 1835 | 0.2  | 1126    | 0.02 |
| mmu-mir-1954-5p   | 12  | 0.58 | 1827 | 0.18 | 2533    | 0.04 |
| mmu-mir-1306-5p   | 20  | 0.3  | 1819 | 0.15 | 4490    | 0.12 |
| mmu-mir-449b-5p   | 6   | 0    | 1800 | 0.2  | 242     | 0.09 |
| mmu-mir-196a-2-3p | 9   | 0.22 | 1798 | 0.12 | 769     | 0.1  |
| mmu-mir-1224-3p   | 333 | 0.55 | 1784 | 0.51 | 3360    | 0.05 |
| mmu-mir-381-5p    | 415 | 0.11 | 1740 | 0.13 | 297     | 0.12 |
| mmu-mir-719-5p    | 9   | 0.33 | 1732 | 0.17 | 2528    | 0.05 |
| mmu-mir-654-5p    | 2   | 0    | 1731 | 0.09 | 260     | 0.01 |
| mmu-mir-145-3p    | 261 | 0.09 | 1730 | 0.12 | 7156    | 0.16 |

|                   |      |      |      |      |        |      |
|-------------------|------|------|------|------|--------|------|
| mmu-mir-323-5p    | 518  | 0.31 | 1723 | 0.24 | 375    | 0.18 |
| mmu-mir-302b-3p   | 2    | 0    | 1711 | 0.11 | 106925 | 0.27 |
| mmu-mir-541-3p    | 306  | 0.13 | 1710 | 0.14 | 5415   | 0.1  |
| mmu-mir-1957-5p   | 36   | 0.83 | 1691 | 0.08 | 1374   | 0.11 |
| mmu-let-7a-2-3p   | 126  | 0.11 | 1689 | 0.11 | 2281   | 0.12 |
| mmu-mir-295-5p    | 2    | 0    | 1684 | 0.5  | 240303 | 0.18 |
| mmu-mir-300-5p    | 704  | 0.14 | 1659 | 0.13 | 1793   | 0.12 |
| mmu-mir-105-5p    |      | 0    | 1639 | 0.11 | 1546   | 0.02 |
| mmu-mir-669e-5p   | 46   | 0.06 | 1632 | 0.11 | 8544   | 0.05 |
| mmu-mir-692-1-3p  | 20   | 0.1  | 1612 | 0.14 | 7241   | 0.01 |
| mmu-mir-692-2-3p  | 23   | 0.13 | 1612 | 0.14 | 8129   | 0.03 |
| mmu-mir-675-3p    | 16   | 0.06 | 1608 | 0.17 | 6002   | 0.05 |
| mmu-mir-27b-5p    | 93   | 0.19 | 1595 | 0.12 | 25113  | 0.06 |
| mmu-mir-133a-1-3p | 194  | 0.04 | 1574 | 0.07 | 482    | 0.02 |
| mmu-mir-133a-2-3p | 194  | 0.04 | 1574 | 0.06 | 546    | 0.03 |
| mmu-mir-721-5p    | 2    | 0    | 1563 | 0.15 | 1612   | 0.04 |
| mmu-mir-24-1-5p   | 179  | 0.21 | 1553 | 0.22 | 6075   | 0.15 |
| mmu-mir-200b-5p   | 1210 | 0.2  | 1551 | 0.17 | 10742  | 0.07 |
| mmu-mir-1903-5p   | 41   | 0.19 | 1550 | 0.17 | 5364   | 0.06 |
| mmu-mir-509-3p    | 5    | 0    | 1544 | 0.03 | 86     | 0.03 |
| mmu-mir-1958-3p   | 7    | 0    | 1534 | 0.1  | 547    | 0.15 |
| mmu-mir-493-5p    | 292  | 0.17 | 1533 | 0.2  | 7714   | 0.11 |
| mmu-mir-876-5p    | 20   | 0.15 | 1522 | 0.45 | 361    | 0.38 |
| mmu-mir-1896-3p   | 15   | 0.13 | 1521 | 0.26 | 2352   | 0.04 |
| mmu-mir-10a-5p    | 73   | 0.05 | 1517 | 0.14 | 368009 | 0.12 |
| mmu-mir-1933-5p   | 7    | 0    | 1514 | 0.12 | 1619   | 0.02 |
| mmu-mir-186-3p    | 212  | 0.24 | 1488 | 0.22 | 13619  | 0.06 |
| mmu-mir-1902-3p   | 6    | 0.33 | 1482 | 0.16 | 223    | 0.13 |
| mmu-mir-683-1-3p  | 307  | 0.58 | 1468 | 0.15 | 523    | 0.17 |
| mmu-mir-882-5p    | 5    | 0    | 1467 | 0.14 | 335    | 0.03 |
| mmu-mir-683-2-3p  | 305  | 0.58 | 1465 | 0.15 | 526    | 0.17 |
| mmu-mir-471-5p    | 2    | 0    | 1458 | 0.18 | 589    | 0.05 |
| mmu-mir-1197-3p   | 213  | 0.02 | 1452 | 0.06 | 944    | 0.07 |
| mmu-mir-1939-5p   | 8    | 0.37 | 1451 | 0.12 | 9130   | 0.52 |
| mmu-mir-376c-5p   | 772  | 0.14 | 1448 | 0.18 | 573    | 0.07 |
| mmu-mir-30b-3p    | 134  | 0.36 | 1437 | 0.2  | 848    | 0.37 |
| mmu-mir-679-5p    | 11   | 0.18 | 1431 | 0.25 | 3133   | 0.09 |
| mmu-mir-191-3p    | 272  | 0.13 | 1420 | 0.14 | 5626   | 0.07 |
| mmu-mir-141-5p    | 511  | 0.28 | 1412 | 0.2  | 1504   | 0.14 |
| mmu-mir-1968-5p   | 13   | 0.3  | 1410 | 0.37 | 506    | 0.33 |
| mmu-mir-1941-3p   | 44   | 0.2  | 1408 | 0.17 | 2886   | 0.07 |

|                    |      |      |      |      |        |      |
|--------------------|------|------|------|------|--------|------|
| mmu-mir-1907-3p    | 71   | 0.12 | 1406 | 0.2  | 432    | 0.08 |
| mmu-mir-875-3p     | 1    | 1    | 1389 | 0.14 | 280    | 0.26 |
| mmu-mir-339-3p     | 131  | 0.26 | 1383 | 0.48 | 2019   | 0.38 |
| mmu-mir-509-5p     | 6    | 0.16 | 1376 | 0.09 | 507    | 0.01 |
| mmu-mir-686-5p     | 2    | 0    | 1362 | 0.2  | 1809   | 0.03 |
| mmu-mir-15a-3p     | 241  | 0.31 | 1349 | 0.16 | 6862   | 0.1  |
| mmu-mir-1970-5p    | 12   | 0    | 1341 | 0.16 | 2396   | 0.19 |
| mmu-mir-1195-5p    | 27   | 0.29 | 1324 | 0.24 | 3866   | 0.18 |
| mmu-mir-204-3p     | 76   | 0.4  | 1322 | 0.32 | 145    | 0.11 |
| mmu-mir-291b-3p    | 20   | 0.05 | 1318 | 0.07 | 37871  | 0.09 |
| mmu-mir-141-3p     | 6161 | 0.33 | 1315 | 0.29 | 3666   | 0.27 |
| mmu-mir-1937b-1-5p | 140  | 0.75 | 1314 | 0.55 | 15786  | 0.61 |
| mmu-mir-202-3p     | 6    | 0.33 | 1314 | 0.33 | 2792   | 0.12 |
| mmu-mir-763-5p     | 1    | 0    | 1309 | 0.2  | 987    | 0.03 |
| mmu-mir-450b-5p    | 6    | 0.16 | 1301 | 0.11 | 875    | 0.02 |
| mmu-mir-297b-5p    | 23   | 0.13 | 1293 | 0.23 | 2089   | 0.14 |
| mmu-mir-1937b-3-5p | 135  | 0.72 | 1291 | 0.54 | 15539  | 0.62 |
| mmu-mir-423-5p     | 158  | 0.17 | 1280 | 0.24 | 17269  | 0.21 |
| mmu-mir-3106-5p    | 582  | 0.14 | 1276 | 0.18 | 7      | 0    |
| mmu-mir-672-3p     | 195  | 0.16 | 1271 | 0.1  | 1769   | 0.09 |
| mmu-mir-200a-5p    | 384  | 0.26 | 1268 | 0.25 | 2050   | 0.17 |
| mmu-mir-673-5p     | 103  | 0.35 | 1260 | 0.35 | 4344   | 0.27 |
| mmu-mir-344c-3p    | 403  | 0.15 | 1258 | 0.16 | 364    | 0.04 |
| mmu-mir-879-3p     | 318  | 0.47 | 1252 | 0.35 | 602    | 0.34 |
| mmu-mir-25-5p      | 14   | 0.14 | 1252 | 0.13 | 5669   | 0.17 |
| mmu-mir-200c-5p    | 11   | 0.09 | 1250 | 0.16 | 564    | 0.07 |
| mmu-mir-216b-5p    | 11   | 0.18 | 1232 | 0.09 | 3925   | 0.02 |
| mmu-mir-3102-5p    | 225  | 0.33 | 1230 | 0.31 | 5933   | 0.31 |
| mmu-mir-883b-3p    | 20   | 0.1  | 1227 | 0.08 | 418    | 0.02 |
| mmu-mir-125b-1-3p  | 298  | 0.27 | 1204 | 0.36 | 6885   | 0.32 |
| mmu-mir-290-3p     | 9    | 0    | 1204 | 0.1  | 23763  | 0.07 |
| mmu-mir-144-3p     | 3252 | 0.2  | 1196 | 0.21 | 169    | 0.15 |
| mmu-mir-1190-3p    | 9    | 0    | 1166 | 0.15 | 1381   | 0.05 |
| mmu-mir-1298-3p    | 93   | 0.08 | 1137 | 0.14 | 57     | 0.12 |
| mmu-mir-1894-3p    | 5    | 0.2  | 1132 | 0.29 | 156    | 0.09 |
| mmu-mir-543-5p     | 446  | 0.26 | 1129 | 0.2  | 2687   | 0.08 |
| mmu-mir-881-5p     | 25   | 0.12 | 1125 | 0.14 | 511    | 0.01 |
| mmu-mir-291a-5p    | 2    | 0.5  | 1124 | 0.11 | 457086 | 0.17 |
| mmu-mir-503-3p     | 94   | 0.23 | 1122 | 0.21 | 2405   | 0.16 |
| mmu-mir-137-5p     | 307  | 0.21 | 1122 | 0.2  | 21     | 0.09 |
| mmu-mir-302b-5p    | 1    | 0    | 1122 | 0.06 | 3156   | 0.07 |

|                   |     |      |      |      |       |      |
|-------------------|-----|------|------|------|-------|------|
| mmu-mir-491-5p    | 51  | 0.23 | 1118 | 0.33 | 1073  | 0.14 |
| mmu-mir-1186-5p   | 4   | 0    | 1116 | 0.24 | 1640  | 0.47 |
| mmu-mir-98-3p     | 410 | 0.15 | 1114 | 0.15 | 7630  | 0.17 |
| mmu-mir-103-2-5p  | 332 | 0.23 | 1099 | 0.21 | 1681  | 0.28 |
| mmu-mir-135a-1-3p | 30  | 0.46 | 1084 | 0.34 | 426   | 0.09 |
| mmu-mir-32-3p     | 33  | 0.12 | 1084 | 0.17 | 4551  | 0.04 |
| mmu-mir-412-5p    | 369 | 0.13 | 1083 | 0.13 | 823   | 0.09 |
| mmu-mir-194-2-5p  | 276 | 0.23 | 1082 | 0.28 | 3456  | 0.14 |
| mmu-mir-693-5p    | 3   | 0    | 1082 | 0.14 | 1257  | 0.03 |
| mmu-mir-465b-1-5p | 1   | 0    | 1076 | 0.11 | 515   | 0.06 |
| mmu-mir-465b-2-5p | 1   | 0    | 1076 | 0.11 | 515   | 0.06 |
| mmu-mir-881-3p    | 3   | 0.33 | 1074 | 0.07 | 228   | 0.15 |
| mmu-mir-10b-3p    | 10  | 0.1  | 1064 | 0.21 | 3235  | 0.09 |
| mmu-mir-1940-5p   | 7   | 0.14 | 1063 | 0.18 | 1148  | 0.05 |
| mmu-mir-432-3p    | 9   | 0.22 | 1053 | 0.09 | 1570  | 0.03 |
| mmu-mir-345-3p    | 119 | 0.38 | 1050 | 0.34 | 19415 | 0.51 |
| mmu-mir-486-3p    | 27  | 0.18 | 1049 | 0.08 | 664   | 0.03 |
| mmu-mir-21-3p     | 158 | 0.31 | 1046 | 0.18 | 16487 | 0.22 |
| mmu-mir-1960-5p   | 9   | 0    | 1018 | 0.11 | 977   | 0.01 |
| mmu-mir-873-3p    | 272 | 0.33 | 1012 | 0.33 | 242   | 0.14 |
| mmu-mir-23b-5p    | 19  | 0.42 | 1008 | 0.19 | 7581  | 0.09 |
| mmu-mir-877-5p    | 102 | 0.41 | 1006 | 0.36 | 9755  | 0.24 |
| mmu-mir-100-3p    | 222 | 0.19 | 1001 | 0.14 | 1737  | 0.07 |
| mmu-mir-18b-5p    | 242 | 0.27 | 999  | 0.09 | 14385 | 0.2  |
| mmu-mir-694-3p    | 17  | 0.17 | 990  | 0.18 | 1304  | 0.01 |
| mmu-mir-92b-5p    | 150 | 0.3  | 989  | 0.33 | 27959 | 0.22 |
| mmu-mir-1932-3p   | 18  | 0.16 | 988  | 0.57 | 1174  | 0.04 |
| mmu-mir-490-5p    | 460 | 0.28 | 986  | 0.27 | 351   | 0.06 |
| mmu-mir-449b-3p   | 5   | 0    | 982  | 0.19 | 4729  | 0.01 |
| mmu-mir-331-5p    | 123 | 0.33 | 976  | 0.25 | 1050  | 0.18 |
| mmu-mir-1929-5p   | 3   | 0    | 956  | 0.12 | 681   | 0.03 |
| mmu-mir-194-1-5p  | 296 | 0.26 | 948  | 0.25 | 2472  | 0.07 |
| mmu-mir-1969-5p   | 11  | 0.27 | 932  | 0.25 | 429   | 0.05 |
| mmu-mir-1937c-3p  | 18  | 0.11 | 911  | 0.2  | 1901  | 0.14 |
| mmu-mir-681-5p    | 14  | 0.07 | 910  | 0.24 | 2007  | 0.06 |
| mmu-mir-669c-5p   | 300 | 0.06 | 909  | 0.05 | 2167  | 0.08 |
| mmu-mir-499-5p    | 67  | 0.22 | 904  | 0.23 | 2346  | 0.09 |
| mmu-mir-302c-3p   | 7   | 0.42 | 901  | 0.23 | 18186 | 0.64 |
| mmu-mir-193b-5p   | 64  | 0.12 | 899  | 0.16 | 3365  | 0.05 |
| mmu-mir-30c-2-3p  | 84  | 0.17 | 896  | 0.14 | 466   | 0.11 |
| mmu-mir-1944-3p   | 19  | 0.15 | 894  | 0.24 | 8970  | 0.03 |

|                   |     |      |     |      |         |      |
|-------------------|-----|------|-----|------|---------|------|
| mmu-mir-1905-3p   | 32  | 0.34 | 889 | 0.3  | 977     | 0.06 |
| mmu-mir-32-5p     | 228 | 0.2  | 888 | 0.13 | 8509    | 0.07 |
| mmu-mir-295-3p    | 14  | 0.07 | 885 | 0.09 | 378325  | 0.06 |
| mmu-mir-3475-3p   | 258 | 0.2  | 876 | 0.3  | 179     | 0.17 |
| mmu-mir-3060-3p   | 151 | 0.48 | 874 | 0.49 | 5927    | 0.53 |
| mmu-mir-26a-2-3p  | 73  | 0.13 | 868 | 0.13 | 3768    | 0.09 |
| mmu-mir-190b-5p   | 103 | 0.11 | 867 | 0.2  | 419     | 0.1  |
| mmu-mir-224-3p    | 8   | 0.12 | 865 | 0.15 | 2205    | 0.06 |
| mmu-mir-547-3p    | 6   | 0.16 | 862 | 0.09 | 2092    | 0.05 |
| mmu-mir-294-3p    | 11  | 0    | 861 | 0.1  | 2647747 | 0.07 |
| mmu-mir-1959-5p   | 496 | 0.45 | 846 | 0.29 | 9207    | 0.15 |
| mmu-mir-26a-1-3p  | 24  | 0.29 | 844 | 0.25 | 2294    | 0.06 |
| mmu-mir-296-3p    | 148 | 0.31 | 843 | 0.26 | 22875   | 0.25 |
| mmu-mir-155-5p    | 64  | 0.21 | 840 | 0.29 | 16752   | 0.2  |
| mmu-mir-18b-3p    | 6   | 0.33 | 823 | 0.34 | 14023   | 0.18 |
| mmu-mir-669m-2-3p | 41  | 0.09 | 815 | 0.09 | 5612    | 0.04 |
| mmu-mir-688-3p    | 14  | 0.14 | 812 | 0.18 | 2395    | 0.02 |
| mmu-mir-184-3p    | 64  | 0.34 | 807 | 0.14 | 1647    | 0.08 |
| mmu-mir-105-3p    | 393 | 0.01 | 805 | 0    | 280     | 0.02 |
| mmu-mir-470-3p    | 4   | 0    | 804 | 0.07 | 307     | 0.04 |
| mmu-mir-1-2-as-5p | 21  | 0.14 | 789 | 0.09 | 2026    | 0.01 |
| mmu-mir-1188-5p   | 44  | 0.31 | 768 | 0.38 | 1581    | 0.3  |
| mmu-mir-1900-3p   | 10  | 0.1  | 767 | 0.08 | 5160    | 0.04 |
| mmu-mir-669m-1-3p | 16  | 0.12 | 763 | 0.08 | 5515    | 0.03 |
| mmu-mir-128-2-5p  | 190 | 0.18 | 760 | 0.15 | 110     | 0.15 |
| mmu-mir-1951-3p   | 6   | 0    | 757 | 0.16 | 1280    | 0.06 |
| mmu-mir-188-3p    | 213 | 0.14 | 756 | 0.19 | 3099    | 0.06 |
| mmu-mir-1944-5p   | 11  | 0    | 742 | 0.22 | 3900    | 0.1  |
| mmu-mir-3083-3p   | 121 | 0.14 | 738 | 0.17 | 58      | 0.12 |
| mmu-mir-16-2-3p   | 327 | 0.18 | 711 | 0.21 | 7669    | 0.14 |
| mmu-mir-1264-5p   | 41  | 0.12 | 701 | 0.21 | 12      | 0.16 |
| mmu-mir-880-3p    | 8   | 0.25 | 697 | 0.08 | 1521    | 0.04 |
| mmu-mir-1981-3p   | 179 | 0.2  | 684 | 0.3  | 3947    | 0.4  |
| mmu-mir-181b-1-3p | 91  | 0.24 | 681 | 0.19 | 2638    | 0.11 |
| mmu-mir-1895-3p   | 19  | 0.1  | 678 | 0.07 | 441     | 0.08 |
| mmu-mir-103-1-5p  | 216 | 0.18 | 668 | 0.3  | 887     | 0.33 |
| mmu-mir-1946b-3p  | 22  | 0.22 | 666 | 0.11 | 4141    | 0.08 |
| mmu-mir-142-3p    | 291 | 0.23 | 662 | 0.24 | 11018   | 0.13 |
| mmu-mir-675-5p    | 3   | 0.33 | 656 | 0.23 | 5317    | 0.04 |
| mmu-mir-128-1-5p  | 179 | 0.16 | 655 | 0.13 | 981     | 0.09 |
| mmu-mir-1948-3p   | 11  | 0.18 | 653 | 0.14 | 1477    | 0.12 |



|                   |      |      |     |      |         |      |
|-------------------|------|------|-----|------|---------|------|
| mmu-mir-292-5p    | 3    | 0    | 650 | 0.12 | 1535192 | 0.19 |
| mmu-mir-214-5p    | 31   | 0.48 | 649 | 0.22 | 42424   | 0.45 |
| mmu-mir-465c-1-5p | 3    | 0    | 638 | 0.18 | 179     | 0.07 |
| mmu-mir-465c-2-5p | 3    | 0    | 638 | 0.18 | 179     | 0.07 |
| mmu-mir-499-3p    | 29   | 0.13 | 635 | 0.11 | 741     | 0.03 |
| mmu-mir-654-3p    | 7    | 0    | 632 | 0.18 | 802     | 0.05 |
| mmu-mir-1967-3p   | 4    | 0    | 623 | 0.21 | 1238    | 0.13 |
| mmu-mir-19a-5p    | 5    | 0    | 618 | 0.12 | 985     | 0.08 |
| mmu-mir-551b-5p   | 25   | 0.16 | 600 | 0.32 | 229     | 0.05 |
| mmu-mir-301a-5p   | 279  | 0.11 | 600 | 0.08 | 12333   | 0.06 |
| mmu-mir-1962-3p   | 12   | 0    | 596 | 0.2  | 645     | 0.29 |
| mmu-mir-1901-3p   | 21   | 0.47 | 592 | 0.15 | 3313    | 0.02 |
| mmu-mir-450b-3p   | 43   | 0.13 | 590 | 0.15 | 2675    | 0.09 |
| mmu-mir-302a-3p   | 1    | 0    | 588 | 0.1  | 70014   | 0.07 |
| mmu-mir-876-3p    | 19   | 0.21 | 587 | 0.12 | 613     | 0.17 |
| mmu-mir-540-5p    | 525  | 0.1  | 580 | 0.11 | 1599    | 0.06 |
| mmu-mir-1971-5p   | 4    | 0    | 578 | 0.39 | 65      | 0.07 |
| mmu-mir-871-5p    | 1    | 0    | 565 | 0.17 | 408     | 0.05 |
| mmu-mir-1947-5p   | 3    | 0.33 | 558 | 0.31 | 246     | 0.15 |
| mmu-mir-210-5p    | 92   | 0.45 | 556 | 0.38 | 47375   | 0.09 |
| mmu-mir-1938-5p   | 1    | 1    | 548 | 0.29 | 897     | 0.05 |
| mmu-mir-470-5p    |      | 0    | 545 | 0.19 | 1837    | 0.05 |
| mmu-mir-670-3p    | 202  | 0.16 | 522 | 0.14 | 364     | 0.09 |
| mmu-mir-3107-5p   | 133  | 0.3  | 520 | 0.46 | 399     | 0.61 |
| mmu-mir-673-3p    | 91   | 0.32 | 511 | 0.24 | 1025    | 0.17 |
| mmu-mir-742-5p    | 1    | 0    | 506 | 0.1  | 247     | 0.02 |
| mmu-mir-706-5p    | 15   | 0.2  | 505 | 0.1  | 332     | 0.11 |
| mmu-mir-203-5p    | 18   | 0.22 | 500 | 0.18 | 1165    | 0.02 |
| mmu-mir-463-3p    | 6    | 0    | 500 | 0.07 | 388     | 0.06 |
| mmu-mir-709-3p    | 66   | 0.31 | 486 | 0.25 | 1386    | 0.16 |
| mmu-mir-201-5p    |      | 0    | 484 | 0.15 | 310     | 0.08 |
| mmu-mir-1930-5p   | 32   | 0.15 | 478 | 0.3  | 7668    | 0.04 |
| mmu-mir-297a-1-5p | 59   | 0.05 | 477 | 0.07 | 2867    | 0.11 |
| mmu-mir-488-3p    | 164  | 0.23 | 476 | 0.27 | 157     | 0.17 |
| mmu-mir-383-3p    | 203  | 0.21 | 469 | 0.17 | 100     | 0.05 |
| mmu-mir-96-5p     | 1478 | 0.18 | 463 | 0.21 | 95963   | 0.01 |
| mmu-mir-3059-5p   | 104  | 0.43 | 457 | 0.4  | 29      | 0.03 |
| mmu-mir-1961-3p   | 256  | 0.06 | 453 | 0.09 | 404     | 0.08 |
| mmu-mir-16-1-3p   | 73   | 0.23 | 452 | 0.11 | 871     | 0.09 |
| mmu-mir-182-3p    | 51   | 0.15 | 449 | 0.15 | 4340    | 0.07 |
| mmu-mir-760-5p    | 106  | 0.25 | 441 | 0.28 | 603     | 0.14 |

|                   |     |      |     |      |       |      |
|-------------------|-----|------|-----|------|-------|------|
| mmu-mir-1966-5p   | 21  | 0.14 | 441 | 0.25 | 942   | 0.04 |
| mmu-mir-691-3p    | 1   | 1    | 440 | 0.11 | 47    | 0.06 |
| mmu-mir-193-5p    | 25  | 0.08 | 439 | 0.18 | 8779  | 0.07 |
| mmu-mir-693-3p    | 14  | 0.21 | 432 | 0.09 | 181   | 0.14 |
| mmu-mir-466f-1-3p | 51  | 0.07 | 430 | 0.08 | 7328  | 0.1  |
| mmu-mir-205-3p    | 4   | 0    | 427 | 0.14 | 2615  | 0.16 |
| mmu-mir-3064-3p   | 56  | 0.07 | 412 | 0.21 | 391   | 0.07 |
| mmu-mir-367-3p    | 21  | 0.09 | 411 | 0.09 | 7372  | 0.15 |
| mmu-mir-1953-5p   | 4   | 0    | 410 | 0.18 | 767   | 0.04 |
| mmu-mir-599-3p    | 24  | 0.04 | 409 | 0.04 | 2091  | 0.01 |
| mmu-mir-1196-5p   | 21  | 0.19 | 405 | 0.14 | 26262 | 0.34 |
| mmu-mir-878-5p    | 2   | 0    | 396 | 0.09 | 517   | 0.02 |
| mmu-mir-1935-3p   | 64  | 0.25 | 392 | 0.14 | 2292  | 0.18 |
| mmu-mir-3078-5p   | 117 | 0.09 | 387 | 0.18 | 521   | 0.1  |
| mmu-mir-1928-3p   | 18  | 0.05 | 385 | 0.12 | 167   | 0.11 |
| mmu-mir-150-3p    | 46  | 0.28 | 384 | 0.14 | 2213  | 0.13 |
| mmu-mir-3473-3p   | 101 | 0.19 | 379 | 0.14 | 15320 | 0.18 |
| mmu-mir-208b-3p   | 19  | 0.47 | 379 | 0.13 | 499   | 0.24 |
| mmu-mir-664-5p    | 102 | 0.38 | 374 | 0.33 | 2259  | 0.17 |
| mmu-mir-451-3p    | 361 | 0.04 | 371 | 0.02 | 183   | 0.16 |
| mmu-mir-1892-3p   | 5   | 0.2  | 366 | 0.33 | 414   | 0.05 |
| mmu-mir-185-3p    | 36  | 0.25 | 365 | 0.2  | 671   | 0.11 |
| mmu-mir-511-3p    | 60  | 0.18 | 364 | 0.15 | 3200  | 0.07 |
| mmu-mir-1-1-5p    | 29  | 0.2  | 363 | 0.12 | 44    | 0.04 |
| mmu-mir-715-5p    | 16  | 0.06 | 362 | 0.21 | 1655  | 0.08 |
| mmu-mir-146b-3p   | 22  | 0.27 | 355 | 0.19 | 950   | 0.07 |
| mmu-mir-1934-5p   | 19  | 0.1  | 350 | 0.14 | 3697  | 0.07 |
| mmu-mir-667-5p    | 102 | 0.32 | 349 | 0.28 | 3526  | 0.22 |
| mmu-mir-3084-3p   | 121 | 0.19 | 336 | 0.25 | 1168  | 0.07 |
| mmu-mir-2136-3p   | 11  | 0.36 | 336 | 0.22 | 837   | 0.12 |
| mmu-mir-598-5p    | 15  | 0.26 | 335 | 0.34 | 86    | 0.06 |
| mmu-mir-466f-3-3p | 11  | 0    | 335 | 0.08 | 8245  | 0.08 |
| mmu-mir-3107-3p   | 21  | 0.23 | 334 | 0.41 | 128   | 0.14 |
| mmu-mir-3473-5p   | 17  | 0.11 | 332 | 0.07 | 900   | 0.25 |
| mmu-mir-762-3p    | 35  | 0.11 | 327 | 0.27 | 1760  | 0.01 |
| mmu-mir-1898-5p   | 15  | 0.13 | 326 | 0.21 | 321   | 0.09 |
| mmu-mir-1187-5p   | 16  | 0.06 | 325 | 0.01 | 1275  | 0.01 |
| mmu-mir-669n-5p   | 3   | 0.66 | 323 | 0.12 | 81    | 0.03 |
| mmu-mir-680-3-5p  | 45  | 0.06 | 322 | 0.04 | 1049  | 0.39 |
| mmu-mir-883a-5p   |     | 0    | 315 | 0.1  | 228   | 0.01 |
| mmu-mir-466f-2-3p | 34  | 0.26 | 314 | 0.1  | 7759  | 0.13 |

|                   |     |      |     |      |       |      |
|-------------------|-----|------|-----|------|-------|------|
| mmu-mir-879-5p    | 69  | 0.3  | 307 | 0.25 | 23    | 0.3  |
| mmu-mir-1906-1-3p | 28  | 0.17 | 304 | 0.35 | 632   | 0.13 |
| mmu-mir-711-3p    | 5   | 0.2  | 304 | 0.06 | 266   | 0.06 |
| mmu-mir-1983-5p   | 176 | 0.25 | 303 | 0.21 | 8237  | 0.13 |
| mmu-mir-568-5p    | 17  | 0.11 | 299 | 0.07 | 48    | 0.02 |
| mmu-mir-1941-5p   | 10  | 0.2  | 293 | 0.24 | 148   | 0.18 |
| mmu-mir-669h-3p   | 14  | 0    | 287 | 0.08 | 521   | 0.03 |
| mmu-mir-1195-3p   | 39  | 0.07 | 283 | 0.08 | 1406  | 0.11 |
| mmu-mir-30d-3p    | 104 | 0.25 | 278 | 0.16 | 1819  | 0.05 |
| mmu-mir-592-3p    | 181 | 0.09 | 277 | 0.13 | 379   | 0.03 |
| mmu-mir-875-5p    | 3   | 0    | 271 | 0.23 | 134   | 0.02 |
| mmu-mir-30c-1-3p  | 47  | 0.14 | 270 | 0.15 | 473   | 0.2  |
| mmu-mir-705-5p    | 8   | 0.37 | 268 | 0.18 | 268   | 0.04 |
| mmu-mir-291a-3p   | 9   | 0.11 | 268 | 0.14 | 88513 | 0.26 |
| mmu-mir-1945-3p   | 3   | 0.33 | 266 | 0.31 | 578   | 0.07 |
| mmu-mir-2139-3p   | 4   | 0    | 264 | 0.11 | 1928  | 0.02 |
| mmu-mir-486-5p    | 72  | 0.08 | 261 | 0.1  | 177   | 0.08 |
| mmu-mir-1964-3p   | 66  | 0.24 | 258 | 0.18 | 2217  | 0.12 |
| mmu-mir-3061-3p   | 100 | 0.2  | 254 | 0.24 | 1690  | 0.34 |
| mmu-mir-3057-3p   | 34  | 0.11 | 249 | 0.19 | 958   | 0.2  |
| mmu-mir-804-3p    | 12  | 0    | 245 | 0.17 | 179   | 0.08 |
| mmu-mir-3069-3p   | 45  | 0.17 | 244 | 0.19 | 214   | 0.17 |
| mmu-mir-466b-3-3p | 1   | 0    | 241 | 0.11 | 319   | 0.11 |
| mmu-mir-3470b-3p  | 58  | 0.18 | 236 | 0.29 | 836   | 0.15 |
| mmu-mir-153-5p    | 179 | 0.14 | 234 | 0.16 | 40    | 0.07 |
| mmu-mir-10a-3p    | 36  | 0.25 | 233 | 0.18 | 2812  | 0.13 |
| mmu-mir-23a-5p    | 19  | 0.21 | 230 | 0.25 | 7248  | 0.13 |
| mmu-mir-466l-3p   | 31  | 0.03 | 230 | 0.22 | 1021  | 0.08 |
| mmu-mir-1912-3p   | 24  | 0.04 | 226 | 0.15 | 155   | 0.1  |
| mmu-mir-344d-2-5p | 12  | 0    | 223 | 0    | 2276  | 0    |
| mmu-mir-365-2-5p  | 6   | 0    | 222 | 0.13 | 400   | 0.14 |
| mmu-mir-743a-5p   |     | 0    | 219 | 0.11 | 608   | 0    |
| mmu-mir-152-5p    | 30  | 0.3  | 218 | 0.26 | 6849  | 0.11 |
| mmu-mir-466c-1-5p | 43  | 0.11 | 218 | 0.11 | 2355  | 0.06 |
| mmu-mir-466c-2-5p | 43  | 0.11 | 218 | 0.11 | 2355  | 0.06 |
| mmu-mir-3087-3p   | 65  | 0.32 | 217 | 0.21 | 323   | 0.2  |
| mmu-mir-669j-3p   | 8   | 0    | 216 | 0.16 | 258   | 0.11 |
| mmu-mir-135b-3p   | 20  | 0.15 | 215 | 0.36 | 3681  | 0.54 |
| mmu-mir-1894-5p   | 10  | 0.1  | 214 | 0.18 | 1706  | 0.02 |
| mmu-mir-669g-3p   | 24  | 0.04 | 213 | 0.23 | 140   | 0.12 |
| mmu-mir-669d-5p   | 52  | 0.19 | 212 | 0.09 | 3086  | 0.08 |

|                   |    |      |     |      |       |      |
|-------------------|----|------|-----|------|-------|------|
| mmu-mir-466f-4-5p | 10 | 0.2  | 211 | 0.1  | 2367  | 0.1  |
| mmu-mir-495-5p    | 45 | 0.13 | 207 | 0.23 | 633   | 0.08 |
| mmu-mir-216a-5p   | 9  | 0.22 | 205 | 0.15 | 157   | 0.07 |
| mmu-mir-3105-5p   | 12 | 0.41 | 204 | 0.3  | 207   | 0.17 |
| mmu-mir-1188-3p   | 45 | 0.24 | 203 | 0.32 | 930   | 0.31 |
| mmu-mir-27a-5p    | 2  | 0.5  | 202 | 0.2  | 7773  | 0.03 |
| mmu-mir-1930-3p   | 12 | 0.16 | 200 | 0.02 | 185   | 0.25 |
| mmu-mir-467f-3p   | 35 | 0.17 | 198 | 0.09 | 621   | 0.06 |
| mmu-mir-466f-1-5p | 2  | 0    | 196 | 0.1  | 2324  | 0.1  |
| mmu-mir-466f-2-5p | 2  | 0    | 196 | 0.1  | 2342  | 0.1  |
| mmu-mir-466f-3-5p | 2  | 0    | 196 | 0.1  | 2340  | 0.1  |
| mmu-mir-3083-5p   | 16 | 0.12 | 194 | 0.25 | 7     | 0.14 |
| mmu-mir-3076-3p   | 41 | 0.26 | 193 | 0.24 | 634   | 0.32 |
| mmu-mir-146a-3p   | 24 | 0.16 | 193 | 0.17 | 315   | 0.2  |
| mmu-mir-1954-3p   | 24 | 0.12 | 193 | 0.12 | 291   | 0.15 |
| mmu-mir-344f-3p   | 51 | 0.35 | 189 | 0.3  | 182   | 0.34 |
| mmu-mir-669d-2-5p | 49 | 0.18 | 189 | 0.08 | 3078  | 0.08 |
| mmu-mir-3097-3p   | 46 | 0.3  | 188 | 0.23 | 398   | 0.15 |
| mmu-mir-1946a-3p  | 12 | 0.41 | 188 | 0.17 | 250   | 0.33 |
| mmu-mir-467c-5p   | 28 | 0.25 | 186 | 0.2  | 3313  | 0.12 |
| mmu-mir-504-3p    | 12 | 0.25 | 186 | 0.18 | 221   | 0.28 |
| mmu-mir-181b-2-3p | 16 | 0.12 | 186 | 0.11 | 1627  | 0.07 |
| mmu-mir-1934-3p   | 83 | 0.25 | 185 | 0.19 | 10474 | 0.21 |
| mmu-mir-196b-5p   |    | 0    | 182 | 0.1  | 6563  | 0.18 |
| mmu-mir-496-5p    | 21 | 0.09 | 181 | 0.17 | 809   | 0.03 |
| mmu-mir-3105-3p   | 81 | 0.08 | 180 | 0.13 | 101   | 0.05 |
| mmu-mir-466m-3p   | 26 | 0    | 180 | 0.12 | 2368  | 0.11 |
| mmu-mir-767-3p    | 10 | 0.1  | 178 | 0.22 | 272   | 0.44 |
| mmu-mir-297a-2-3p | 36 | 0.22 | 175 | 0.13 | 2570  | 0.09 |
| mmu-mir-1946b-5p  | 39 | 0.25 | 173 | 0.27 | 1009  | 0.17 |
| mmu-mir-1943-3p   | 77 | 0.16 | 173 | 0.18 | 943   | 0.16 |
| mmu-mir-3471-1-3p | 72 | 0.15 | 171 | 0.14 | 1212  | 0.02 |
| mmu-mir-719-3p    | 19 | 0.1  | 170 | 0.03 | 163   | 0.15 |
| mmu-mir-344d-3-5p | 19 | 0.21 | 169 | 0.23 | 36    | 0.08 |
| mmu-mir-3099-5p   | 50 | 0.24 | 168 | 0.26 | 37    | 0.08 |
| mmu-mir-3470b-5p  | 32 | 0.15 | 168 | 0.2  | 399   | 0.22 |
| mmu-mir-1251-5p   | 56 | 0.25 | 168 | 0.11 | 59    | 0.35 |
| mmu-mir-297a-5-3p | 35 | 0.11 | 167 | 0.09 | 7246  | 0.05 |
| mmu-mir-467h-3p   | 22 | 0.09 | 166 | 0.09 | 450   | 0.14 |
| mmu-mir-2137-3p   | 31 | 0.29 | 165 | 0.25 | 2416  | 0.05 |
| mmu-mir-344e-3p   | 25 | 0.04 | 159 | 0.23 | 398   | 0.06 |

|                   |     |      |     |      |      |      |
|-------------------|-----|------|-----|------|------|------|
| mmu-mir-3085-5p   | 33  | 0.09 | 159 | 0.21 | 86   | 0.03 |
| mmu-mir-1906-2-3p | 42  | 0.04 | 158 | 0.17 | 389  | 0.06 |
| mmu-mir-297a-6-3p | 23  | 0.08 | 157 | 0.15 | 2596 | 0.09 |
| mmu-mir-1936-3p   | 5   | 0    | 156 | 0.21 | 847  | 0.23 |
| mmu-mir-1196-3p   | 16  | 0.06 | 156 | 0.03 | 642  | 0.04 |
| mmu-mir-3470a-3p  | 46  | 0.15 | 155 | 0.18 | 445  | 0.09 |
| mmu-mir-3086-3p   | 37  | 0.08 | 153 | 0.14 | 156  | 0.19 |
| mmu-mir-652-5p    | 41  | 0.19 | 149 | 0.28 | 8051 | 0.11 |
| mmu-mir-450a-1-3p | 54  | 0.09 | 149 | 0.1  | 339  | 0.07 |
| mmu-mir-487b-5p   | 59  | 0.32 | 147 | 0.23 | 106  | 0.05 |
| mmu-mir-715-3p    | 83  | 0.32 | 144 | 0.17 | 1614 | 0.18 |
| mmu-mir-149-3p    | 3   | 0    | 143 | 0.18 | 283  | 0.15 |
| mmu-mir-217-3p    | 13  | 0.07 | 143 | 0.16 | 103  | 0.08 |
| mmu-mir-3074-1-3p | 48  | 0.52 | 142 | 0.44 | 842  | 0.34 |
| mmu-mir-298-3p    | 14  | 0.21 | 141 | 0.13 | 4396 | 0.26 |
| mmu-mir-1971-3p   | 18  | 0.11 | 139 | 0.18 | 794  | 0.34 |
| mmu-mir-1903-3p   | 16  | 0.12 | 138 | 0.09 | 238  | 0.16 |
| mmu-mir-3106-3p   | 53  | 0.16 | 137 | 0.18 | 54   | 0.12 |
| mmu-mir-297c-5p   | 9   | 0.22 | 137 | 0.16 | 739  | 0.12 |
| mmu-mir-466h-5p   | 16  | 0.06 | 136 | 0.13 | 862  | 0.09 |
| mmu-mir-297a-4-5p | 18  | 0.05 | 136 | 0.11 | 2507 | 0.08 |
| mmu-mir-297a-5-5p | 18  | 0.05 | 136 | 0.11 | 2507 | 0.08 |
| mmu-mir-3062-5p   | 29  | 0.24 | 135 | 0.14 | 3554 | 0.08 |
| mmu-mir-3104-3p   | 17  | 0.35 | 134 | 0.44 | 27   | 0.22 |
| mmu-mir-297a-3-5p | 16  | 0.06 | 133 | 0.12 | 2502 | 0.08 |
| mmu-mir-465a-5p   | 2   | 0    | 131 | 0.11 | 309  | 0.01 |
| mmu-mir-410-5p    | 32  | 0.28 | 129 | 0.2  | 890  | 0.19 |
| mmu-mir-3082-5p   | 24  | 0.2  | 128 | 0.14 | 654  | 0.07 |
| mmu-mir-467d-5p   | 22  | 0.18 | 127 | 0.13 | 615  | 0.19 |
| mmu-mir-467g-3p   | 57  | 0.12 | 127 | 0.13 | 119  | 0.09 |
| mmu-mir-1952-5p   | 18  | 0.83 | 126 | 0.4  | 1402 | 0.34 |
| mmu-mir-3093-3p   | 45  | 0.24 | 125 | 0.33 | 56   | 0.19 |
| mmu-mir-3061-5p   | 32  | 0.25 | 125 | 0.23 | 197  | 0.16 |
| mmu-mir-466i-3p   | 39  | 0.17 | 124 | 0.08 | 966  | 0.1  |
| mmu-mir-3091-3p   | 45  | 0.08 | 123 | 0.08 | 395  | 0.1  |
| mmu-mir-669e-3p   | 16  | 0    | 122 | 0.15 | 1995 | 0.13 |
| mmu-mir-493-3p    | 22  | 0.27 | 121 | 0.23 | 552  | 0.24 |
| mmu-mir-615-5p    | 133 | 0.44 | 119 | 0.2  | 1090 | 0.11 |
| mmu-mir-717-5p    | 20  | 0.1  | 117 | 0.16 | 752  | 0.29 |
| mmu-mir-1897-5p   | 3   | 0    | 116 | 0.51 | 30   | 0.13 |
| mmu-mir-3082-3p   | 19  | 0.31 | 116 | 0.19 | 161  | 0.22 |

|                   |     |      |     |      |      |      |
|-------------------|-----|------|-----|------|------|------|
| mmu-mir-3472-3p   | 6   | 0.5  | 113 | 0.07 | 193  | 0.07 |
| mmu-mir-3093-5p   | 14  | 0.21 | 111 | 0.29 | 30   | 0.06 |
| mmu-mir-669i-3p   | 8   | 0.12 | 111 | 0.07 | 80   | 0.12 |
| mmu-mir-328-5p    | 10  | 0    | 110 | 0.32 | 724  | 0.25 |
| mmu-mir-1961-5p   | 111 | 0.42 | 108 | 0.14 | 159  | 0.27 |
| mmu-mir-1964-5p   | 19  | 0.47 | 107 | 0.24 | 459  | 0.47 |
| mmu-mir-466n-3p   | 24  | 0.04 | 104 | 0.11 | 5021 | 0.1  |
| mmu-mir-705-3p    | 16  | 0.12 | 104 | 0.02 | 150  | 0.16 |
| mmu-mir-3059-3p   | 10  | 0.3  | 102 | 0.25 | 70   | 0.08 |
| mmu-mir-466d-3p   | 30  | 0.43 | 102 | 0.06 | 889  | 0.09 |
| mmu-mir-1912-5p   | 57  | 0.29 | 97  | 0.44 | 12   | 0.33 |
| mmu-mir-3103-3p   | 20  | 0.4  | 97  | 0.28 | 182  | 0.25 |
| mmu-mir-467b-3p   | 11  | 0.18 | 96  | 0.07 | 237  | 0.07 |
| mmu-mir-3057-5p   | 25  | 0.28 | 95  | 0.28 | 544  | 0.35 |
| mmu-mir-3077-3p   | 28  | 0.14 | 92  | 0.29 | 349  | 0.53 |
| mmu-mir-3070b-3p  | 15  | 0.4  | 91  | 0.25 | 107  | 0.27 |
| mmu-mir-3090-3p   | 45  | 0.13 | 91  | 0.15 | 124  | 0.07 |
| mmu-mir-3095-3p   | 19  | 0.05 | 90  | 0.17 | 261  | 0.24 |
| mmu-mir-759-3p    | 37  | 0.08 | 90  | 0.17 | 489  | 0.04 |
| mmu-mir-1-2-as-3p | 6   | 0.33 | 90  | 0.12 | 683  | 0.05 |
| mmu-mir-1192-3p   | 27  | 0.07 | 87  | 0.09 | 366  | 0.05 |
| mmu-mir-3101-5p   | 35  | 0.14 | 86  | 0.08 | 724  | 0.09 |
| mmu-mir-1947-3p   | 138 | 0.04 | 85  | 0.07 | 374  | 0.05 |
| mmu-mir-669l-5p   | 13  | 0.07 | 84  | 0.05 | 2048 | 0.07 |
| mmu-mir-344f-5p   | 23  | 0.52 | 83  | 0.57 | 67   | 0.35 |
| mmu-mir-668-5p    | 24  | 0.33 | 83  | 0.42 | 72   | 0.41 |
| mmu-mir-106a-3p   | 352 | 0.03 | 80  | 0.25 | 2478 | 0.13 |
| mmu-mir-351-3p    | 13  | 0.23 | 80  | 0.12 | 420  | 0.16 |
| mmu-mir-3088-3p   | 9   | 0.11 | 79  | 0.07 | 83   | 0.12 |
| mmu-mir-484-3p    | 33  | 0.18 | 79  | 0.07 | 214  | 0.09 |
| mmu-let-7a-1-3p   | 32  | 0.28 | 78  | 0.06 | 140  | 0.22 |
| mmu-mir-1942-3p   | 39  | 0.05 | 75  | 0.04 | 56   | 0.03 |
| mmu-mir-677-3p    | 26  | 0.07 | 74  | 0.1  | 254  | 0.16 |
| mmu-mir-147-5p    | 2   | 0.5  | 74  | 0.04 | 75   | 0.09 |
| mmu-mir-344-1-5p  | 3   | 0    | 73  | 0.23 | 126  | 0.07 |
| mmu-mir-669k-3p   | 11  | 0    | 73  | 0.13 | 352  | 0.04 |
| mmu-mir-1187-3p   | 6   | 0    | 73  | 0.1  | 492  | 0.14 |
| mmu-mir-466f-4-3p | 21  | 0.19 | 72  | 0.06 | 179  | 0.11 |
| mmu-mir-2145-2-3p | 8   | 0    | 71  | 0.04 | 90   | 0.1  |
| mmu-mir-3097-5p   | 27  | 0.44 | 70  | 0.35 | 205  | 0.31 |
| mmu-mir-3076-5p   | 11  | 0.36 | 70  | 0.28 | 120  | 0.25 |

|                    |    |      |    |      |       |      |
|--------------------|----|------|----|------|-------|------|
| mmu-mir-1198-3p    | 17 | 0.17 | 69 | 0.27 | 363   | 0.06 |
| mmu-mir-3471-2-3p  | 39 | 0.17 | 69 | 0.18 | 238   | 0.16 |
| mmu-mir-466j-3p    | 23 | 0.13 | 69 | 0.1  | 247   | 0.07 |
| mmu-mir-546-3p     | 19 | 0.15 | 68 | 0.17 | 162   | 0.09 |
| mmu-mir-3058-5p    | 19 | 0.15 | 68 | 0.1  | 252   | 0.11 |
| mmu-mir-761-3p     | 24 | 0.08 | 67 | 0.11 | 71    | 0.12 |
| mmu-mir-344-2-5p   | 3  | 0    | 66 | 0.24 | 103   | 0.06 |
| mmu-mir-1955-3p    | 20 | 0.2  | 66 | 0.18 | 488   | 0.39 |
| mmu-mir-3067-3p    | 8  | 0.12 | 66 | 0.13 | 84    | 0.34 |
| mmu-mir-1937b-1-3p | 20 | 0    | 64 | 0.09 | 60    | 0.2  |
| mmu-mir-1965-5p    | 11 | 0.09 | 63 | 0.15 | 66    | 0.12 |
| mmu-mir-374c-3p    | 4  | 0    | 63 | 0.11 | 66    | 0.04 |
| mmu-mir-194-2-3p   | 16 | 0.18 | 62 | 0.14 | 100   | 0.22 |
| mmu-mir-92a-1-5p   | 13 | 0.15 | 62 | 0.09 | 36516 | 0.04 |
| mmu-mir-3470a-5p   | 3  | 0.33 | 61 | 0.21 | 116   | 0.09 |
| mmu-mir-494-5p     | 10 | 0.1  | 61 | 0.14 | 620   | 0.09 |
| mmu-mir-3062-3p    | 13 | 0.23 | 61 | 0.09 | 83    | 0.12 |
| mmu-mir-669d-2-3p  | 18 | 0    | 60 | 0.18 | 705   | 0.03 |
| mmu-mir-344g-3p    | 37 | 0.48 | 59 | 0.27 | 257   | 0.26 |
| mmu-mir-1251-3p    | 9  | 0.11 | 59 | 0.2  | 76    | 0.14 |
| mmu-mir-669f-3p    | 7  | 0.28 | 59 | 0.15 | 512   | 0.02 |
| mmu-mir-190b-3p    | 11 | 0.27 | 59 | 0.05 | 88    | 0.04 |
| mmu-mir-208a-3p    | 11 | 0.09 | 58 | 0.13 | 74    | 0.1  |
| mmu-mir-216a-3p    | 10 | 0.1  | 58 | 0.13 | 45    | 0.08 |
| mmu-mir-3086-5p    | 6  | 0.33 | 57 | 0.4  | 21    | 0.14 |
| mmu-mir-1904-3p    | 13 | 0.3  | 57 | 0.14 | 216   | 0.12 |
| mmu-mir-1937b-2-3p | 16 | 0.06 | 56 | 0.32 | 168   | 0.08 |
| mmu-mir-143-5p     | 34 | 0.29 | 56 | 0.25 | 1553  | 0.27 |
| mmu-mir-681-3p     | 7  | 0.14 | 56 | 0.17 | 75    | 0.13 |
| mmu-mir-199a-1-3p  | 18 | 0.11 | 56 | 0.1  | 51    | 0.05 |
| mmu-mir-3112-3p    | 25 | 0    | 56 | 0.1  | 72    | 0.11 |
| mmu-mir-469-3p     | 17 | 0.23 | 55 | 0.1  | 451   | 0.03 |
| mmu-let-7c-2-3p    | 19 | 0.1  | 55 | 0.07 | 50    | 0.08 |
| mmu-mir-466k-5p    | 64 | 0.04 | 55 | 0.05 | 99    | 0.04 |
| mmu-mir-350-5p     | 4  | 0    | 54 | 0.33 | 50    | 0.24 |
| mmu-mir-181d-3p    | 23 | 0.47 | 54 | 0.12 | 1384  | 0.09 |
| mmu-mir-3078-3p    | 16 | 0.18 | 54 | 0.12 | 222   | 0.34 |
| mmu-mir-710-3p     | 6  | 0    | 54 | 0.11 | 120   | 0.23 |
| mmu-mir-1982-5p    | 4  | 0.25 | 53 | 0.35 | 253   | 0.1  |
| mmu-mir-211-3p     | 6  | 0.16 | 53 | 0.16 | 135   | 0.34 |
| mmu-mir-3096-3p    | 22 | 0.09 | 53 | 0.13 | 1247  | 0.13 |

|                    |     |      |    |      |      |      |
|--------------------|-----|------|----|------|------|------|
| mmu-mir-1306-3p    | 6   | 0.16 | 53 | 0.07 | 81   | 0.08 |
| mmu-mir-1967-5p    | 4   | 0.5  | 53 | 0.03 | 32   | 0.06 |
| mmu-mir-718-3p     | 9   | 0.33 | 52 | 0.15 | 138  | 0.15 |
| mmu-mir-669b-3p    | 13  | 0    | 52 | 0.09 | 355  | 0.03 |
| mmu-mir-669o-3p    | 11  | 0.09 | 52 | 0.09 | 296  | 0.07 |
| mmu-mir-1937b-4-3p | 35  | 0.17 | 51 | 0.13 | 87   | 0.1  |
| mmu-mir-2145-1-5p  | 10  | 0    | 51 | 0.07 | 413  | 0.03 |
| mmu-mir-1953-3p    | 120 | 0.07 | 51 | 0.01 | 202  | 0.07 |
| mmu-mir-3113-3p    | 9   | 0.44 | 50 | 0.24 | 165  | 0.27 |
| mmu-mir-1959-3p    | 14  | 0.07 | 50 | 0.18 | 93   | 0.08 |
| mmu-mir-3094-3p    | 12  | 0.41 | 50 | 0.14 | 290  | 0.15 |
| mmu-mir-466h-3p    | 12  | 0.08 | 49 | 0.26 | 1306 | 0.08 |
| mmu-mir-680-2-3p   | 11  | 0.09 | 49 | 0.12 | 101  | 0.2  |
| mmu-mir-669c-3p    | 11  | 0.27 | 49 | 0.06 | 278  | 0.12 |
| mmu-mir-3098-3p    | 6   | 0.5  | 48 | 0.18 | 277  | 0.27 |
| mmu-mir-3071-3p    | 13  | 0.07 | 48 | 0.12 | 146  | 0.04 |
| mmu-mir-3089-3p    | 4   | 0    | 48 | 0.1  | 205  | 0.21 |
| mmu-mir-3109-3p    | 4   | 0.25 | 47 | 0.34 | 224  | 0.09 |
| mmu-mir-1969-3p    | 8   | 0.25 | 47 | 0.23 | 132  | 0.28 |
| mmu-mir-1957-3p    | 4   | 0.25 | 47 | 0.1  | 596  | 0.03 |
| mmu-mir-3110-3p    | 7   | 0    | 47 | 0.04 | 72   | 0.19 |
| mmu-mir-1904-5p    | 1   | 0    | 46 | 0.28 | 90   | 0.2  |
| mmu-mir-669d-3p    | 17  | 0.17 | 46 | 0.13 | 754  | 0.04 |
| mmu-mir-1186-3p    | 8   | 0.25 | 46 | 0.06 | 154  | 0.09 |
| mmu-mir-449a-3p    | 31  | 0.06 | 45 | 0.11 | 68   | 0.05 |
| mmu-mir-216b-3p    | 4   | 0    | 44 | 0.22 | 50   | 0.18 |
| mmu-mir-3058-3p    | 13  | 0.15 | 44 | 0.2  | 352  | 0.25 |
| mmu-mir-1937b-5-3p | 28  | 0.21 | 44 | 0.06 | 88   | 0.11 |
| mmu-mir-467f-5p    | 30  | 0.1  | 44 | 0.06 | 148  | 0.14 |
| mmu-mir-344g-5p    | 2   | 0    | 43 | 0.44 | 22   | 0.18 |
| mmu-mir-3471-2-5p  | 7   | 0    | 43 | 0.23 | 91   | 0.07 |
| mmu-mir-1249-5p    | 11  | 0.18 | 43 | 0.13 | 310  | 0.15 |
| mmu-mir-702-5p     | 8   | 0.25 | 42 | 0.5  | 882  | 0.38 |
| mmu-mir-680-3-3p   | 6   | 0.33 | 42 | 0.19 | 60   | 0.13 |
| mmu-mir-3080-3p    | 15  | 0    | 42 | 0.16 | 61   | 0.24 |
| mmu-mir-3101-3p    | 7   | 0.42 | 42 | 0.11 | 130  | 0.4  |
| mmu-mir-1199-5p    | 8   | 0.25 | 41 | 0.31 | 220  | 0.38 |
| mmu-mir-1968-3p    | 6   | 0.16 | 41 | 0.19 | 212  | 0.33 |
| mmu-mir-3092-3p    | 12  | 0.16 | 41 | 0.17 | 187  | 0.3  |
| mmu-mir-1929-3p    | 22  | 0.09 | 41 | 0.12 | 190  | 0.14 |
| mmu-mir-196a-1-3p  | 17  | 0.11 | 41 | 0.09 | 5095 | 0.06 |



|                    |    |      |    |      |      |      |
|--------------------|----|------|----|------|------|------|
| mmu-mir-1937b-3-3p | 24 | 0    | 39 | 0.12 | 104  | 0.08 |
| mmu-mir-363-5p     | 1  | 1    | 39 | 0.07 | 1952 | 0.07 |
| mmu-mir-665-5p     | 22 | 0.27 | 39 | 0.07 | 114  | 0.17 |
| mmu-mir-3113-5p    | 9  | 0.44 | 38 | 0.15 | 351  | 0.13 |
| mmu-mir-706-3p     | 10 | 0    | 38 | 0.15 | 386  | 0.05 |
| mmu-mir-3075-3p    | 11 | 0.27 | 37 | 0.1  | 110  | 0.23 |
| mmu-mir-3095-5p    | 11 | 0.18 | 37 | 0.05 | 113  | 0.25 |
| mmu-mir-1943-5p    | 5  | 0.2  | 36 | 0.22 | 2744 | 0.13 |
| mmu-mir-3069-5p    | 6  | 0    | 36 | 0.19 | 33   | 0.12 |
| mmu-mir-297a-1-3p  | 75 | 0.05 | 36 | 0.11 | 25   | 0    |
| mmu-mir-297a-3-3p  | 19 | 0.1  | 36 | 0.08 | 93   | 0.05 |
| mmu-mir-320-5p     | 18 | 0.38 | 36 | 0.08 | 704  | 0.24 |
| mmu-mir-3064-5p    | 14 | 0.35 | 36 | 0.02 | 50   | 0.32 |
| mmu-mir-1927-5p    | 17 | 0.05 | 35 | 0.31 | 115  | 0.13 |
| mmu-mir-703-3p     | 20 | 0.15 | 35 | 0.28 | 830  | 0.13 |
| mmu-mir-1938-3p    | 15 | 0    | 35 | 0.17 | 97   | 0.11 |
| mmu-mir-467e-3p    | 3  | 0    | 35 | 0.05 | 174  | 0.01 |
| mmu-mir-1937b-5-5p | 3  | 0    | 35 | 0.02 | 124  | 0.05 |
| mmu-mir-3100-3p    | 8  | 0.12 | 34 | 0.35 | 72   | 0.44 |
| mmu-mir-466o-3p    | 13 | 0.15 | 33 | 0.27 | 184  | 0.16 |
| mmu-mir-1186b-5p   | 3  | 0    | 33 | 0.21 | 44   | 0.18 |
| mmu-mir-467h-5p    | 32 | 0.12 | 33 | 0.18 | 58   | 0.08 |
| mmu-mir-3073-3p    | 12 | 0.16 | 33 | 0.09 | 226  | 0.11 |
| mmu-mir-3066-3p    | 5  | 0.2  | 33 | 0.06 | 778  | 0.03 |
| mmu-mir-1937b-2-5p | 3  | 0    | 33 | 0.03 | 124  | 0.05 |
| mmu-mir-1937b-4-5p | 4  | 0    | 33 | 0.03 | 125  | 0.05 |
| mmu-mir-3079-3p    | 8  | 0    | 33 | 0.03 | 240  | 0.05 |
| mmu-mir-3098-5p    | 11 | 0.18 | 32 | 0.31 | 131  | 0.09 |
| mmu-mir-802-3p     | 13 | 0.07 | 32 | 0.18 | 78   | 0.05 |
| mmu-mir-1893-3p    | 3  | 0.33 | 32 | 0.15 | 47   | 0.14 |
| mmu-mir-1948-5p    | 5  | 0    | 32 | 0.15 | 66   | 0.04 |
| mmu-mir-1966-3p    | 12 | 0.33 | 32 | 0.15 | 41   | 0.17 |
| mmu-mir-1937a-5p   | 3  | 0    | 32 | 0.09 | 1065 | 0.14 |
| mmu-mir-194-1-3p   | 2  | 0    | 32 | 0.09 | 62   | 0.08 |
| mmu-mir-804-5p     | 2  | 0    | 32 | 0.03 | 39   | 0.2  |
| mmu-mir-1274a-3p   | 6  | 0    | 32 | 0    | 62   | 0.11 |
| mmu-mir-3074-2-3p  | 7  | 0.14 | 31 | 0.19 | 276  | 0.29 |
| mmu-mir-1940-3p    | 27 | 0.11 | 31 | 0.16 | 94   | 0.06 |
| mmu-mir-669l-3p    | 10 | 0    | 31 | 0.16 | 706  | 0.02 |
| mmu-mir-680-1-3p   | 3  | 0.33 | 31 | 0.16 | 148  | 0.18 |
| mmu-mir-3087-5p    | 9  | 0.33 | 31 | 0.12 | 16   | 0.43 |

|                   |    |      |    |      |      |      |
|-------------------|----|------|----|------|------|------|
| mmu-mir-3074-2-5p | 2  | 0.5  | 31 | 0.09 | 73   | 0.06 |
| mmu-mir-3081-3p   | 22 | 0.18 | 31 | 0.09 | 173  | 0.27 |
| mmu-mir-669f-5p   | 11 | 0.09 | 31 | 0    | 1150 | 0.11 |
| mmu-mir-3091-5p   | 12 | 0.25 | 30 | 0.26 | 479  | 0.44 |
| mmu-mir-101b-5p   | 29 | 0.2  | 30 | 0.2  | 514  | 0.12 |
| mmu-mir-3471-1-5p | 7  | 0.14 | 30 | 0.2  | 98   | 0.08 |
| mmu-mir-466k-3p   | 14 | 0.28 | 30 | 0.13 | 92   | 0.18 |
| mmu-mir-546-5p    | 6  | 0.33 | 30 | 0.06 | 48   | 0.12 |
| mmu-mir-1970-3p   | 14 | 0.07 | 30 | 0.03 | 56   | 0.1  |
| mmu-mir-1937a-3p  | 10 | 0    | 29 | 0.17 | 80   | 0.11 |
| mmu-mir-1952-3p   | 7  | 0.14 | 29 | 0.17 | 100  | 0.21 |
| mmu-mir-367-5p    | 1  | 1    | 29 | 0.17 | 125  | 0.24 |
| mmu-mir-467g-5p   | 17 | 0.23 | 29 | 0.17 | 17   | 0.05 |
| mmu-mir-1960-3p   | 8  | 0.12 | 29 | 0.13 | 51   | 0.27 |
| mmu-mir-1951-5p   | 11 | 0.36 | 29 | 0.03 | 163  | 0.06 |
| mmu-mir-3070a-3p  | 10 | 0.1  | 28 | 0.25 | 191  | 0.05 |
| mmu-mir-539-3p    | 11 | 0    | 28 | 0.21 | 92   | 0.22 |
| mmu-mir-871-3p    | 13 | 0    | 28 | 0.07 | 101  | 0.12 |
| mmu-mir-301b-5p   | 9  | 0.11 | 27 | 0.25 | 3608 | 0.24 |
| mmu-mir-669a-3-3p | 6  | 0    | 27 | 0.22 | 31   | 0.06 |
| mmu-mir-763-3p    | 10 | 0.2  | 27 | 0.14 | 70   | 0.12 |
| mmu-mir-3074-1-5p | 7  | 0.14 | 27 | 0.11 | 70   | 0.05 |
| mmu-mir-450a-2-3p | 6  | 0.5  | 27 | 0.11 | 102  | 0.11 |
| mmu-mir-1191-5p   | 6  | 0.16 | 27 | 0.03 | 195  | 0.17 |
| mmu-mir-449c-3p   | 13 | 0.23 | 26 | 0.26 | 62   | 0.17 |
| mmu-mir-701-3p    | 11 | 0    | 26 | 0.23 | 82   | 0.18 |
| mmu-mir-1899-3p   | 15 | 0.2  | 26 | 0.19 | 100  | 0.08 |
| mmu-mir-1950-3p   | 13 | 0    | 26 | 0.19 | 59   | 0.16 |
| mmu-mir-3065-3p   | 4  | 0    | 26 | 0.19 | 155  | 0.69 |
| mmu-mir-365-1-5p  | 2  | 0    | 26 | 0.19 | 520  | 0.29 |
| mmu-mir-1193-5p   | 25 | 0.2  | 26 | 0.11 | 396  | 0.17 |
| mmu-mir-1956-3p   | 3  | 0.33 | 26 | 0.07 | 69   | 0.42 |
| mmu-mir-201-3p    | 6  | 0.5  | 26 | 0.07 | 90   | 0.18 |
| mmu-mir-695-3p    | 25 | 0.36 | 25 | 0.2  | 228  | 0.18 |
| mmu-mir-297a-4-3p | 5  | 0.2  | 25 | 0.16 | 67   | 0.07 |
| mmu-mir-1186b-3p  | 9  | 0.11 | 24 | 0.2  | 81   | 0.04 |
| mmu-mir-3094-5p   | 4  | 0.25 | 24 | 0.16 | 38   | 0.05 |
| mmu-mir-466j-5p   | 12 | 0.08 | 24 | 0.12 | 87   | 0.18 |
| mmu-mir-467c-3p   | 5  | 0    | 24 | 0.12 | 176  | 0.06 |
| mmu-mir-466i-5p   | 13 | 0.07 | 24 | 0.08 | 175  | 0.06 |
| mmu-mir-568-3p    | 12 | 0.08 | 24 | 0.04 | 104  | 0.09 |

|                   |    |      |    |      |      |      |
|-------------------|----|------|----|------|------|------|
| mmu-mir-717-3p    | 5  | 0    | 24 | 0.04 | 57   | 0.15 |
| mmu-mir-344e-5p   | 1  | 0    | 23 | 0.39 | 10   | 0.3  |
| mmu-mir-466p-3p   | 21 | 0.19 | 23 | 0.21 | 89   | 0.17 |
| mmu-mir-1907-5p   | 3  | 0.33 | 23 | 0.17 | 14   | 0.21 |
| mmu-mir-713-5p    | 47 | 0.14 | 23 | 0.08 | 263  | 0.02 |
| mmu-mir-1939-3p   | 60 | 0.05 | 23 | 0    | 228  | 0.23 |
| mmu-mir-199a-2-3p | 15 | 0.13 | 23 | 0    | 2138 | 0.07 |
| mmu-mir-669b-5p   | 15 | 0.13 | 22 | 0.31 | 94   | 0.07 |
| mmu-mir-698-5p    | 6  | 0.33 | 22 | 0.22 | 38   | 0.07 |
| mmu-mir-680-1-5p  | 2  | 0.5  | 21 | 0.47 | 487  | 0.4  |
| mmu-mir-680-2-5p  | 1  | 1    | 21 | 0.47 | 490  | 0.4  |
| mmu-mir-3475-5p   | 3  | 0.33 | 21 | 0.42 | 15   | 0.06 |
| mmu-mir-758-5p    | 4  | 0    | 21 | 0.28 | 198  | 0.17 |
| mmu-mir-3065-5p   | 1  | 0    | 21 | 0.23 | 30   | 0.2  |
| mmu-mir-346-3p    | 12 | 0.16 | 21 | 0.14 | 105  | 0.17 |
| mmu-mir-697-5p    | 2  | 0    | 21 | 0.14 | 91   | 0.06 |
| mmu-mir-1898-3p   | 13 | 0    | 21 | 0.04 | 51   | 0.09 |
| mmu-mir-3108-3p   | 45 | 0.06 | 21 | 0.04 | 101  | 0.15 |
| mmu-mir-691-5p    | 1  | 0    | 21 | 0    | 10   | 0.2  |
| mmu-mir-3072-5p   | 1  | 1    | 20 | 0.35 | 474  | 0.39 |
| mmu-mir-471-3p    | 9  | 0    | 20 | 0.25 | 53   | 0.05 |
| mmu-mir-3063-3p   | 6  | 0.16 | 20 | 0.15 | 124  | 0.12 |
| mmu-mir-489-5p    | 4  | 0    | 20 | 0.1  | 109  | 0.12 |
| mmu-mir-133b-5p   | 2  | 0    | 20 | 0.05 | 23   | 0.04 |
| mmu-mir-326-5p    | 5  | 0    | 19 | 0.26 | 43   | 0.18 |
| mmu-mir-709-5p    | 1  | 0    | 19 | 0.26 | 33   | 0.15 |
| mmu-mir-1962-5p   | 3  | 0    | 19 | 0.15 | 25   | 0.04 |
| mmu-mir-882-3p    | 4  | 0    | 19 | 0.15 | 53   | 0.2  |
| mmu-mir-215-3p    | 5  | 0.2  | 19 | 0.1  | 60   | 0.06 |
| mmu-mir-2861-3p   | 21 | 0.09 | 19 | 0.1  | 312  | 0.1  |
| mmu-mir-669a-2-3p | 7  | 0    | 19 | 0.1  | 40   | 0.05 |
| mmu-mir-653-3p    | 9  | 0.22 | 19 | 0    | 77   | 0.01 |
| mmu-mir-155-3p    | 5  | 0    | 18 | 0.22 | 148  | 0.14 |
| mmu-mir-466c-2-3p | 3  | 0    | 18 | 0.16 | 25   | 0.04 |
| mmu-mir-669j-5p   | 5  | 0.2  | 18 | 0.16 | 33   | 0.06 |
| mmu-mir-208b-5p   | 3  | 0    | 18 | 0.11 | 8    | 0.12 |
| mmu-mir-2861-5p   | 7  | 0.14 | 18 | 0.11 | 28   | 0.07 |
| mmu-mir-184-5p    | 6  | 0.33 | 18 | 0.05 | 111  | 0.03 |
| mmu-mir-687-3p    | 4  | 0    | 18 | 0.05 | 33   | 0.15 |
| mmu-mir-669p-1-3p | 3  | 0    | 17 | 0.41 | 61   | 0.01 |
| mmu-mir-669p-2-3p | 3  | 0    | 17 | 0.41 | 61   | 0.01 |

|                   |    |      |    |      |      |      |
|-------------------|----|------|----|------|------|------|
| mmu-mir-341-5p    | 6  | 0.33 | 17 | 0.29 | 46   | 0.21 |
| mmu-mir-669n-3p   | 4  | 0    | 17 | 0.23 | 50   | 0.3  |
| mmu-mir-1901-5p   | 23 | 0.17 | 17 | 0.17 | 22   | 0.09 |
| mmu-mir-327-3p    | 6  | 0.16 | 17 | 0.17 | 81   | 0.08 |
| mmu-mir-1895-5p   | 3  | 0    | 17 | 0.05 | 27   | 0.11 |
| mmu-mir-3080-5p   | 5  | 0.4  | 17 | 0.05 | 17   | 0.17 |
| mmu-mir-374c-5p   | 1  | 0    | 16 | 0.25 | 111  | 0.86 |
| mmu-mir-1247-3p   | 18 | 0.11 | 16 | 0.18 | 94   | 0.05 |
| mmu-mir-466c-1-3p | 1  | 0    | 16 | 0.18 | 17   | 0    |
| mmu-mir-678-5p    | 3  | 0.33 | 16 | 0.18 | 169  | 0.37 |
| mmu-mir-3110-5p   | 4  | 0.5  | 16 | 0.12 | 37   | 0.1  |
| mmu-mir-1936-5p   | 3  | 0.33 | 16 | 0.06 | 26   | 0.07 |
| mmu-mir-3063-5p   | 2  | 0.5  | 16 | 0.06 | 113  | 0.02 |
| mmu-mir-3092-5p   | 5  | 0.2  | 16 | 0.06 | 55   | 0.09 |
| mmu-mir-2139-5p   |    | 0    | 15 | 0.13 | 28   | 0.07 |
| mmu-mir-1199-3p   | 12 | 0.08 | 15 | 0.06 | 93   | 0.1  |
| mmu-mir-1963-3p   | 13 | 0.07 | 15 | 0.06 | 48   | 0.12 |
| mmu-mir-3067-5p   | 5  | 0    | 15 | 0.06 | 58   | 0.08 |
| mmu-mir-3096-5p   | 1  | 0    | 15 | 0.06 | 1753 | 0.14 |
| mmu-mir-688-5p    | 3  | 0    | 15 | 0.06 | 37   | 0.13 |
| mmu-mir-707-3p    | 6  | 0.33 | 14 | 0.14 | 28   | 0    |
| mmu-mir-297a-6-5p | 7  | 0.14 | 14 | 0.07 | 24   | 0.04 |
| mmu-mir-694-5p    | 11 | 0.09 | 14 | 0.07 | 118  | 0.13 |
| mmu-mir-3071-5p   | 3  | 0.33 | 14 | 0    | 9    | 0.11 |
| mmu-mir-3066-5p   | 7  | 0    | 13 | 0.15 | 315  | 0.16 |
| mmu-mir-3100-5p   | 1  | 0    | 13 | 0.07 | 11   | 0.09 |
| mmu-mir-344c-5p   | 9  | 0    | 13 | 0.07 | 31   | 0.16 |
| mmu-mir-465c-1-3p | 1  | 0    | 12 | 0.25 | 22   | 0.18 |
| mmu-mir-465c-2-3p | 1  | 0    | 12 | 0.25 | 22   | 0.18 |
| mmu-mir-3060-5p   | 23 | 0.3  | 12 | 0.16 | 110  | 0.43 |
| mmu-mir-3108-5p   | 3  | 0    | 12 | 0.16 | 261  | 0.15 |
| mmu-mir-1190-5p   | 7  | 0.14 | 12 | 0.08 | 77   | 0.11 |
| mmu-mir-1945-5p   | 1  | 0    | 12 | 0.08 | 31   | 0.03 |
| mmu-mir-297c-3p   | 2  | 0.5  | 12 | 0.08 | 39   | 0.07 |
| mmu-mir-466m-5p   | 6  | 0.16 | 12 | 0.08 | 208  | 0.08 |
| mmu-mir-1932-5p   | 2  | 0    | 12 | 0    | 20   | 0.05 |
| mmu-mir-465b-1-3p | 4  | 0    | 12 | 0    | 24   | 0.16 |
| mmu-mir-465b-2-3p | 4  | 0    | 12 | 0    | 24   | 0.16 |
| mmu-mir-718-5p    | 1  | 0    | 12 | 0    | 21   | 0.14 |
| mmu-mir-1197-5p   | 3  | 0.33 | 11 | 0.18 | 93   | 0.21 |
| mmu-mir-3088-5p   | 3  | 0    | 11 | 0.18 | 22   | 0.27 |

|                    |    |      |    |      |     |      |
|--------------------|----|------|----|------|-----|------|
| mmu-mir-1958-5p    | 2  | 0.5  | 11 | 0.09 | 23  | 0.21 |
| mmu-mir-208a-5p    |    | 0    | 11 | 0.09 | 50  | 0.14 |
| mmu-mir-453-5p     | 2  | 0    | 11 | 0    | 6   | 0.33 |
| mmu-mir-465a-3p    | 11 | 0.18 | 10 | 0.3  | 16  | 0.37 |
| mmu-mir-762-5p     | 3  | 0    | 10 | 0.3  | 17  | 0.17 |
| mmu-mir-466a-3p    | 6  | 0    | 10 | 0.2  | 29  | 0.2  |
| mmu-mir-1931-5p    | 2  | 0    | 10 | 0.1  | 21  | 0.04 |
| mmu-mir-199b-3p    | 15 | 0    | 10 | 0.1  | 54  | 0.2  |
| mmu-mir-207-5p     | 13 | 0.23 | 10 | 0.1  | 63  | 0.23 |
| mmu-mir-3079-5p    | 5  | 0.2  | 10 | 0.1  | 23  | 0.13 |
| mmu-mir-669m-2-5p  | 2  | 0    | 10 | 0.1  | 53  | 0.05 |
| mmu-mir-669o-5p    |    | 0    | 10 | 0.1  | 128 | 0    |
| mmu-mir-690-5p     | 5  | 0    | 10 | 0.1  | 32  | 0.06 |
| mmu-mir-683-1-5p   | 4  | 0.25 | 10 | 0    | 18  | 0.22 |
| mmu-mir-683-2-5p   | 4  | 0.25 | 10 | 0    | 18  | 0.22 |
| mmu-mir-3104-5p    | 2  | 0.5  | 9  | 0.44 | 21  | 0.57 |
| mmu-mir-1906-1-5p  | 3  | 0    | 9  | 0.11 | 21  | 0.14 |
| mmu-mir-1906-2-5p  | 3  | 0    | 9  | 0.11 | 21  | 0.14 |
| mmu-mir-429-5p     |    | 0    | 9  | 0.11 | 69  | 0.11 |
| mmu-mir-669a-12-3p | 6  | 0    | 9  | 0.11 | 8   | 0.12 |
| mmu-mir-2137-5p    |    | 0    | 9  | 0    | 13  | 0    |
| mmu-mir-375-5p     | 3  | 0    | 9  | 0    | 28  | 0.14 |
| mmu-mir-466g-5p    | 5  | 0    | 9  | 0    | 665 | 0.07 |
| mmu-mir-704-5p     |    | 0    | 9  | 0    | 28  | 0.03 |
| mmu-mir-711-5p     | 2  | 0    | 9  | 0    | 9   | 0    |
| mmu-mir-3090-5p    | 2  | 0    | 8  | 0.37 | 25  | 0.12 |
| mmu-mir-3073-5p    | 2  | 0.5  | 8  | 0.25 | 91  | 0.12 |
| mmu-mir-466l-5p    | 6  | 0.5  | 8  | 0.25 | 30  | 0.03 |
| mmu-mir-1892-5p    | 4  | 0    | 8  | 0.12 | 104 | 0.05 |
| mmu-mir-669m-1-5p  | 1  | 0    | 8  | 0.12 | 47  | 0.06 |
| mmu-mir-297b-3p    | 6  | 0.16 | 8  | 0    | 41  | 0.17 |
| mmu-mir-686-3p     | 14 | 0    | 8  | 0    | 86  | 0.05 |
| mmu-mir-3109-5p    | 5  | 0    | 7  | 0.71 | 218 | 0.18 |
| mmu-mir-1937c-5p   | 3  | 0.33 | 7  | 0.14 | 14  | 0    |
| mmu-mir-3474-3p    | 7  | 0    | 7  | 0.14 | 43  | 0.09 |
| mmu-mir-464-5p     |    | 0    | 7  | 0.14 | 15  | 0.33 |
| mmu-mir-206-5p     |    | 0    | 7  | 0    | 76  | 0.01 |
| mmu-mir-3112-5p    | 4  | 0.25 | 7  | 0    | 55  | 0.32 |
| mmu-mir-467a-1-3p  |    | 0    | 7  | 0    | 13  | 0    |
| mmu-mir-468-5p     | 1  | 0    | 7  | 0    | 20  | 0    |
| mmu-mir-3474-5p    | 4  | 0.75 | 6  | 0.5  | 63  | 0.14 |

|                    |    |      |   |      |      |      |
|--------------------|----|------|---|------|------|------|
| mmu-mir-343-5p     | 2  | 0    | 6 | 0.33 | 12   | 0.16 |
| mmu-mir-684-1-5p   | 2  | 0    | 6 | 0.33 | 26   | 0.07 |
| mmu-mir-684-2-5p   | 2  | 0    | 6 | 0.33 | 26   | 0.07 |
| mmu-mir-2136-5p    | 5  | 0    | 6 | 0.16 | 8    | 0.12 |
| mmu-mir-3472-5p    |    | 0    | 6 | 0.16 | 11   | 0.45 |
| mmu-mir-599-5p     | 2  | 0    | 6 | 0.16 | 9    | 0    |
| mmu-mir-669i-5p    | 2  | 0    | 6 | 0.16 | 5    | 0    |
| mmu-mir-1893-5p    | 6  | 0.16 | 6 | 0    | 7    | 0.28 |
| mmu-mir-19b-2-5p   |    | 0    | 6 | 0    | 1131 | 0.12 |
| mmu-mir-3081-5p    | 1  | 0    | 6 | 0    | 47   | 0.14 |
| mmu-mir-3089-5p    | 1  | 0    | 6 | 0    | 22   | 0.18 |
| mmu-mir-547-5p     | 8  | 0    | 6 | 0    | 36   | 0.05 |
| mmu-mir-682-5p     | 3  | 0    | 6 | 0    | 46   | 0.17 |
| mmu-mir-344b-5p    | 1  | 1    | 5 | 0.2  | 2    | 0    |
| mmu-mir-1900-5p    | 1  | 0    | 5 | 0    | 16   | 0.25 |
| mmu-mir-1905-5p    |    | 0    | 5 | 0    | 6    | 0.33 |
| mmu-mir-3075-5p    | 2  | 0    | 5 | 0    | 20   | 0.35 |
| mmu-mir-344d-1-5p  | 3  | 0.33 | 5 | 0    | 12   | 0.08 |
| mmu-mir-467a-2-3p  |    | 0    | 5 | 0    | 3    | 0.33 |
| mmu-mir-1928-5p    |    | 0    | 4 | 0.25 | 4    | 0    |
| mmu-mir-1935-5p    |    | 0    | 4 | 0.25 | 3    | 0.33 |
| mmu-mir-692-1-5p   | 5  | 0    | 4 | 0.25 | 69   | 0.23 |
| mmu-mir-692-2-5p   | 4  | 0    | 4 | 0.25 | 63   | 0.25 |
| mmu-mir-880-5p     | 16 | 0.06 | 4 | 0.25 | 10   | 0.1  |
| mmu-mir-1902-5p    | 1  | 0    | 4 | 0    | 4    | 0.25 |
| mmu-mir-3070b-5p   |    | 0    | 4 | 0    | 5    | 0.8  |
| mmu-mir-467a-10-3p | 2  | 0    | 4 | 0    | 6    | 0.16 |
| mmu-mir-467a-3-3p  | 2  | 0    | 4 | 0    | 6    | 0.16 |
| mmu-mir-467a-4-3p  |    | 0    | 4 | 0    | 5    | 0    |
| mmu-mir-467a-6-3p  | 2  | 0    | 4 | 0    | 6    | 0.16 |
| mmu-mir-467a-7-3p  |    | 0    | 4 | 0    | 5    | 0    |
| mmu-mir-467a-9-3p  |    | 0    | 4 | 0    | 5    | 0    |
| mmu-mir-1896-5p    | 2  | 0    | 3 | 0    | 19   | 0.1  |
| mmu-mir-1949-5p    | 2  | 0.5  | 3 | 0    | 8    | 0.12 |
| mmu-mir-3077-5p    |    | 0    | 3 | 0    | 8    | 0    |
| mmu-mir-466b-2-5p  | 2  | 0    | 2 | 0    | 3    | 0    |
| mmu-mir-669a-5-3p  | 1  | 0    | 2 | 0    | 8    | 0.12 |
| mmu-mir-1942-5p    | 3  | 0    | 1 | 1    | 108  | 0.37 |
| mmu-mir-297a-2-5p  | 1  | 1    | 1 | 0    | 7    | 0.57 |
| mmu-mir-3103-5p    | 1  | 0    | 1 | 0    | 25   | 0.16 |
| mmu-mir-432-5p     | 1  | 0    | 1 | 0    | 3    | 0    |

|                    |   |     |   |   |    |      |
|--------------------|---|-----|---|---|----|------|
| mmu-mir-466b-4-3p  |   | 0   | 1 | 0 | 1  | 0    |
| mmu-mir-466b-5-3p  |   | 0   | 1 | 0 | 1  | 0    |
| mmu-mir-466b-6-3p  |   | 0   | 1 | 0 | 1  | 0    |
| mmu-mir-466p-5p    |   | 0   | 1 | 0 | 6  | 0    |
| mmu-mir-467a-2-5p  | 2 | 0.5 | 1 | 0 | 4  | 0.25 |
| mmu-mir-467a-4-5p  | 2 | 0.5 | 1 | 0 | 4  | 0.25 |
| mmu-mir-467a-5-5p  | 2 | 0.5 | 1 | 0 | 4  | 0.25 |
| mmu-mir-467a-7-5p  | 2 | 0.5 | 1 | 0 | 4  | 0.25 |
| mmu-mir-467a-8-5p  | 2 | 0.5 | 1 | 0 | 4  | 0.25 |
| mmu-mir-467a-9-5p  | 2 | 0.5 | 1 | 0 | 4  | 0.25 |
| mmu-mir-669a-1-3p  | 3 | 0   | 1 | 0 | 2  | 0    |
| mmu-mir-679-3p     | 1 | 0   | 1 | 0 | 1  | 0    |
| mmu-mir-720-5p     | 6 | 0   | 1 | 0 | 9  | 0.33 |
| mmu-mir-741-5p     |   | 0   | 1 | 0 | 5  | 0.2  |
| mmu-mir-3070a-5p   |   | 0   |   | 0 | 5  | 0    |
| mmu-mir-466a-5p    |   | 0   |   | 0 | 23 | 0    |
| mmu-mir-466b-3-5p  |   | 0   |   | 0 | 1  | 0    |
| mmu-mir-466b-7-3p  |   | 0   |   | 0 | 4  | 0.25 |
| mmu-mir-467a-1-5p  |   | 0   |   | 0 | 1  | 1    |
| mmu-mir-669a-10-3p | 2 | 0   |   | 0 | 1  | 0    |
| mmu-mir-669a-11-3p | 2 | 0   |   | 0 | 1  | 0    |
| mmu-mir-669a-4-3p  | 2 | 0   |   | 0 | 1  | 0    |
| mmu-mir-669a-6-3p  | 2 | 0   |   | 0 | 1  | 0    |
| mmu-mir-669a-7-3p  | 2 | 0   |   | 0 | 1  | 0    |
| mmu-mir-669a-8-3p  | 2 | 0   |   | 0 | 1  | 0    |
| mmu-mir-669a-9-3p  | 2 | 0   |   | 0 | 1  | 0    |
| mmu-mir-669k-5p    | 1 | 0   |   | 0 | 6  | 0.33 |

### III Supplementary Figures S1-S6

Supplementary Figure S1.

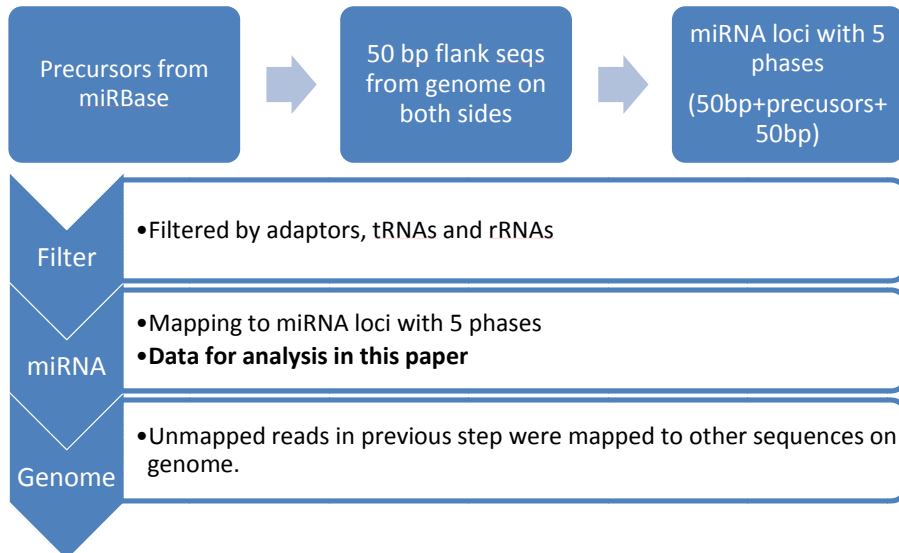



Supplementary Figure S2.

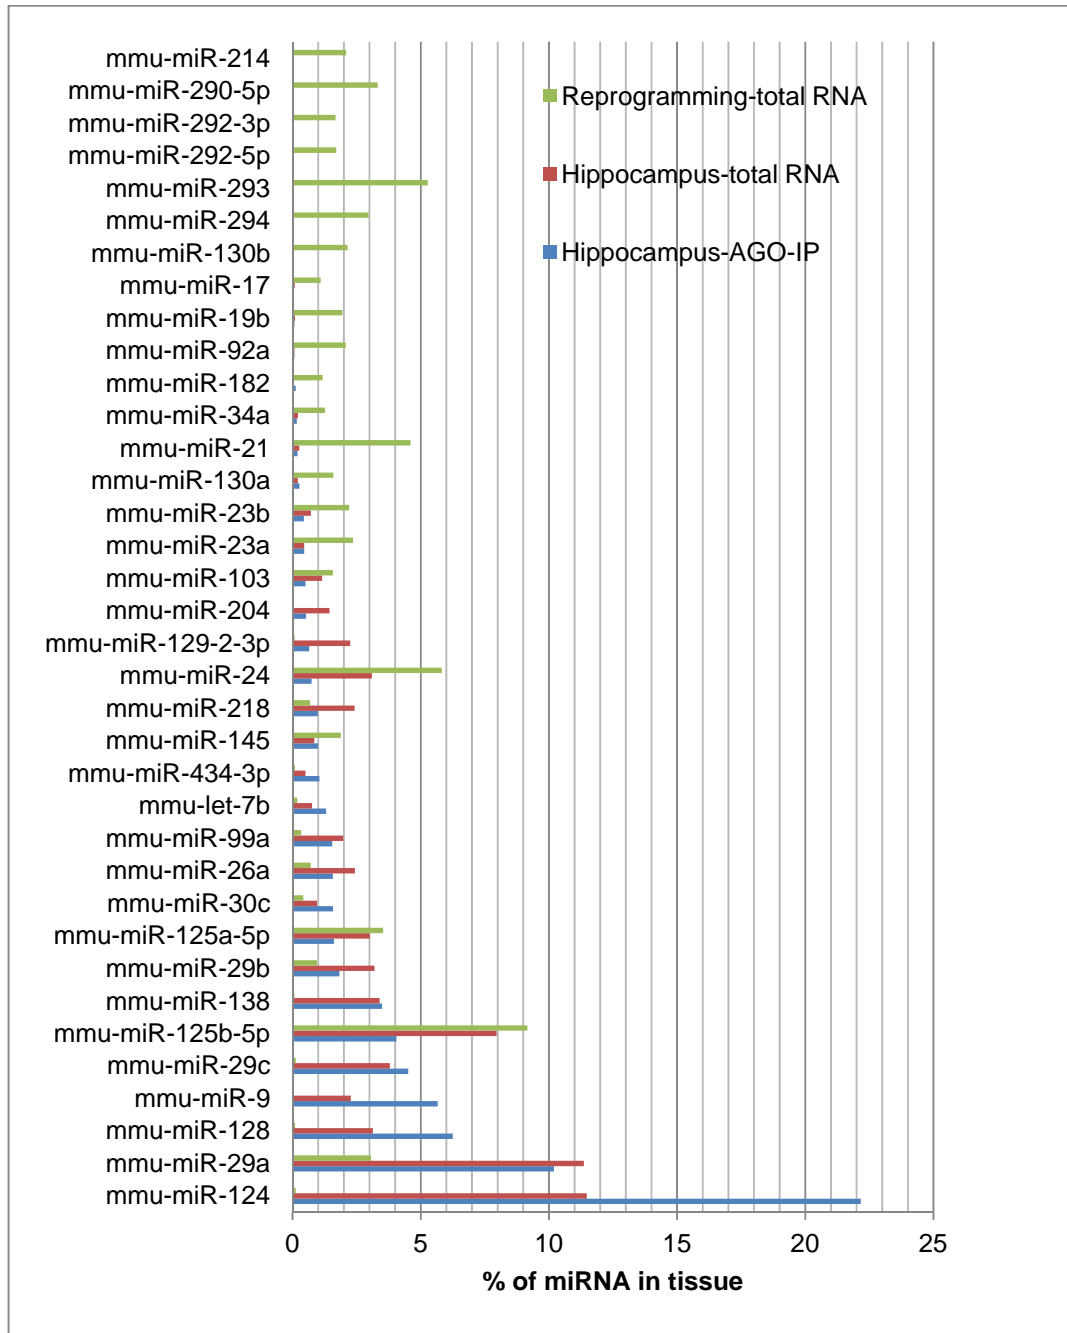

Supplementary Figure S3.

(A)

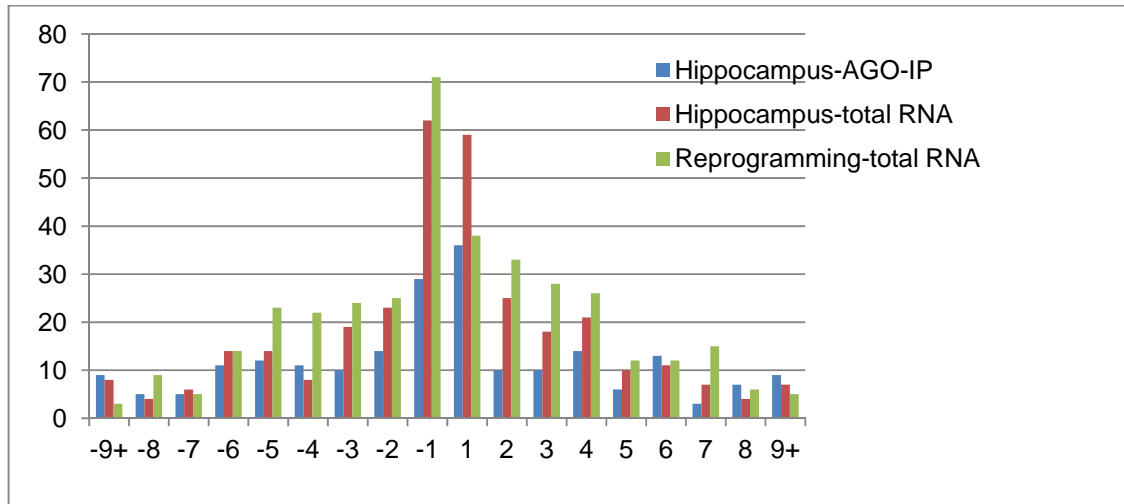

(B)

|    | Hippocampus-AGO-IP | Hippocampus-total RNA | Reprogramming-total RNA |
|----|--------------------|-----------------------|-------------------------|
| 5' | 156                | 251                   | 242                     |
| 3' | 171                | 262                   | 286                     |

Supplementary Figure S4.

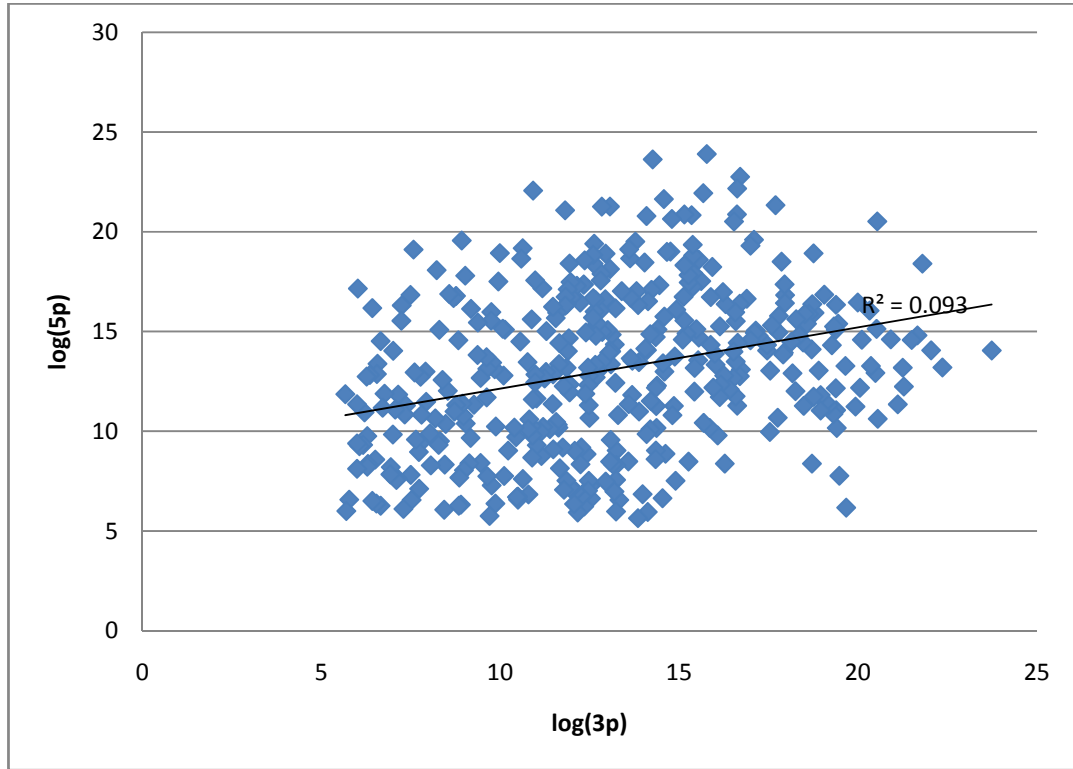

Supplementary Figure S5.

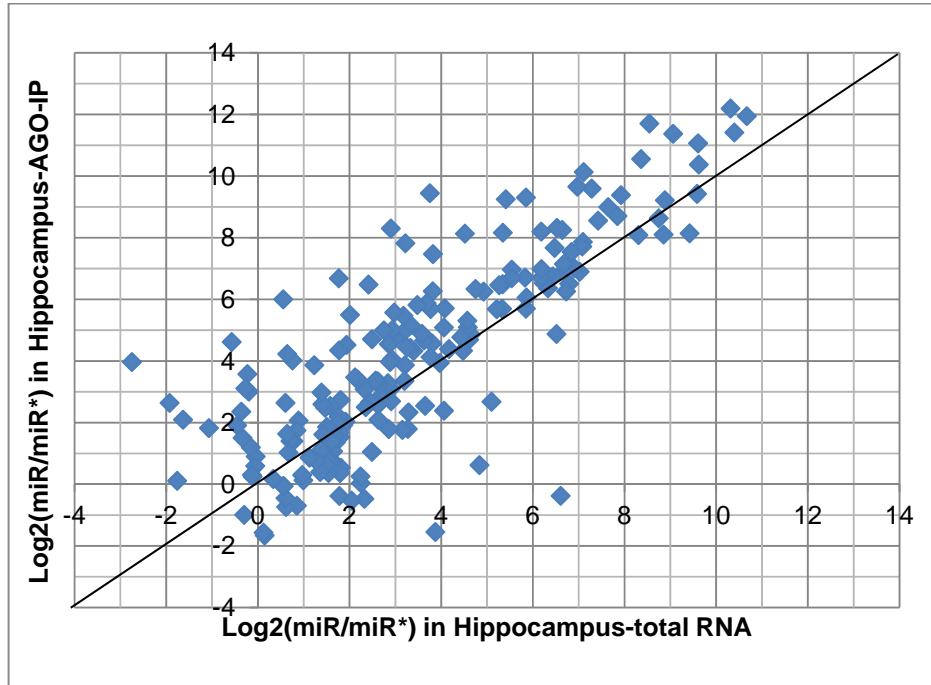

Supplementary Figure S6.

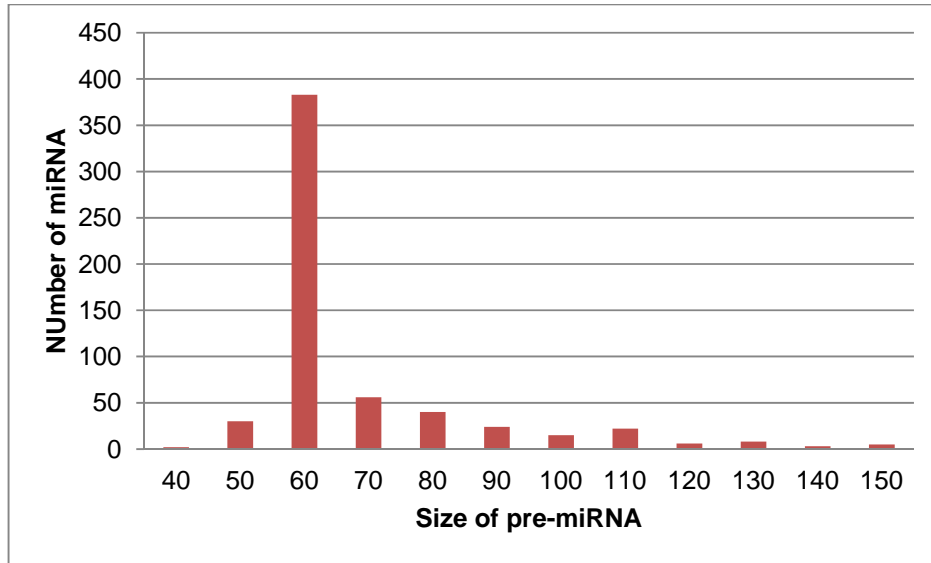

## IV Supplementary Dataset S1-S3

Dataset S1: Hippocampus-total RNA.txt

Dataset S2: Reprogramming-total RNA.txt

Dataset S3: Hippocampus-AGO-IP.txt

```

>mmu-mir-124-1
CAGGAGAAAGGCCTCTCTCCGTGTTACAGCGGACCTTGATTAAATGTCCATACAATTAAGGCACGCGGTGAATGCCAAGAATGGGGCTGTCTGAGCACCTTGGGTC species len reads
-AGGAGAAAGGCCTCTCTCTC----- morL 20 2
--GGAGAAAGGCCTCTCTCTC----- morL 19 1
---GAAAGGCCTCTCTCTCCG----- morL 18 1
CAGGAGAAAGGCCTCTCT----- morL 18 1
----AAAGGCCTCTCTCTCCGT----- morL 18 1
-----CGTGTTACAGCGGACCTTGA----- mirL 21 18100
-----CGTGTTACAGCGGACCTTGAT----- mirL 22 12423
-----CGTGTTACAGCGGACCTTG----- mirL 20 4595
-----CGTGTTACAGCGGACCTTGATT----- mirL 23 1056
-----CGTGTTACAGCGGACCTT----- mirL 19 1051
-----CGTGTTACAGCGGACCT----- mirL 18 396
-----CGTGTTACAGCGGACCTTGATT----- mirL 24 145
-----GTGTTACAGCGGACCTTGAT----- mirL 21 95
-----GTGTTACAGCGGACCTTGA----- mirL 20 63
-----GTTACAGCGGACCTTGA----- mirL 18 61
-----TGTTACAGCGGACCTTGA----- mirL 19 47
-----TGTTACAGCGGACCTTGAT----- mirL 20 46
-----TGTTACAGCGGACCTTGATT----- mirL 21 35
-----GTGTTACAGCGGACCTTG----- mirL 19 29
-----CCGTGTTACAGCGGACCTTGA----- mirL 22 26
-----GTGTTACAGCGGACCTTGATT----- mirL 22 19
-----TGTTACAGCGGACCTTG----- mirL 18 14
-----GTTACAGCGGACCTTGAT----- mirL 19 9
-----TGTTACAGCGGACCTTGATT----- mirL 22 9
-----GTGTTACAGCGGACCTTGATT----- mirL 23 8
-----CCGTGTTACAGCGGACCTTG----- mirL 21 6
-----CCGTGTTACAGCGGACCTTGAT----- mirL 23 5
-----GTGTTACAGCGGACCTT----- mirL 18 5
-----GTTACAGCGGACCTTGATT----- mirL 21 2
-----GTGTTACAGCGGACCTTGATT----- mirL 24 2
-----CTCCGTGTTACAGCGGACCTTGAT----- mirL 25 1
-----TGTTACAGCGGACCTTGATT----- mirL 23 1
-----TCCGTGTTACAGCGGACCT----- mirL 19 1
-----TGATTAAATGTCCATAC----- loop 18 1
-----AAATGTCCATACAATTAA----- loop 18 1
-----TAAGGCACGCGGTGAATGCCA----- mirR 21 2401801
-----TAAGGCACGCGGTGAATGCCAA----- mirR 22 916755
-----TAAGGCACGCGGTGAATGCC----- mirR 20 704628
-----TAAGGCACGCGGTGAATGC----- mirR 19 502356
-----TAAGGCACGCGGTGAATGCCAAG----- mirR 23 493995
-----TTAAGGCACGCGGTGAATGCCA----- mirR 22 242691
-----AAGGCACGCGGTGAATGCCA----- mirR 20 133454
-----TTAAGGCACGCGGTGAATGCC----- mirR 21 94523
-----TTAAGGCACGCGGTGAATGCCAA----- mirR 23 88902

```

```

-----TAAGGCACGCGGTGAATGCCAAGA----- mirR 24 78279
-----TTAAGGCACGCGGTGAATGC----- mirR 20 66778
-----AAGGCACGCGGTGAATGCCAA----- mirR 21 62519
-----TTAAGGCACGCGGTGAATGCCAAG----- mirR 24 45665
-----AAGGCACGCGGTGAATGCCAAG----- mirR 22 40705
-----AAGGCACGCGGTGAATGCC----- mirR 19 33968
-----TAAGGCACGCGGTGAATG----- mirR 18 32355
-----AAGGCACGCGGTGAATGC----- mirR 18 18099
-----TTAAGGCACGCGGTGAATGCCAAGA----- mirR 25 10317
-----AAGGCACGCGGTGAATGCCAAGA----- mirR 23 6321
-----TTAAGGCACGCGGTGAATG----- mirR 19 3630
-----AAGGCACGCGGTGAATGCCAAGAA----- mirR 24 919
-----AGGCACGCGGTGAATGCCA----- mirR 19 864
-----ATTAAGGCACGCGGTGAATGCCA----- mirR 23 398
-----GGCACGCGGTGAATGCCA----- mirR 18 342
-----AGGCACGCGGTGAATGCCAA----- mirR 20 277
-----ATTAAGGCACGCGGTGAATGCC----- mirR 22 208
-----AGGCACGCGGTGAATGCC----- mirR 18 196
-----ATTAAGGCACGCGGTGAATGCCAA----- mirR 24 184
-----AGGCACGCGGTGAATGCCAAG----- mirR 21 145
-----AATTAAGGCACGCGGTGAATGCCA----- mirR 24 136
-----GGCACGCGGTGAATGCCAA----- mirR 19 106
-----AATTAAGGCACGCGGTGAATGCC----- mirR 23 97
-----ATTAAGGCACGCGGTGAATGC----- mirR 21 89
-----ATTAAGGCACGCGGTGAATGCCAAG----- mirR 25 72
-----GGCACGCGGTGAATGCCAAG----- mirR 20 55
-----AATTAAGGCACGCGGTGAATGCCAA----- mirR 25 52
-----AGGCACGCGGTGAATGCCAAGA----- mirR 22 37
-----GGCACGCGGTGAATGCCAAGA----- mirR 21 20
-----AATTAAGGCACGCGGTGAATGC----- mirR 22 18
-----AATTAAGGCACGCGGTGAATGCCAAG----- mirR 26 17
-----ATTAAGGCACGCGGTGAATGCCAAGA----- mirR 26 11
-----AGGCACGCGGTGAATGCCAAGAA----- mirR 23 9
-----ATTAAGGCACGCGGTGAA----- mirR 18 8
-----AATTAAGGCACGCGGTGAAT----- mirR 20 3
-----AATTAAGGCACGCGGTGAA----- mirR 19 2
-----GAATGGGGCTGTCTGAGCACC----- morR 21 5
-----GAATGGGGCTGTCTGAGCA----- morR 19 3
-----GAATGGGGCTGTCTGAGCACCT----- morR 22 2
-----GAATGGGGCTGTCTGAGCAC----- morR 20 2
-----ATGGGGCTGTCTGAGCACC----- morR 19 1
-----CAAGAATGGGGCTGTCTG----- morR 18 1
-----GAATGGGGCTGTCTGAGCACCTTGGGTC morR 28 1
-----AGAATGGGGCTGTCTGAG----- morR 18 1
-----AAGAATGGGGCTGTCTGAGCA----- morR 21 1
-----AAGAATGGGGCTGTCTGAGC----- morR 20 1

```



```

>mmu-mir-124-3
CCGCCCGCCGCAGCCCTGAGGGCCCCTCTGCGTGTTCACAGCGGACCTTGATTTAATGTCTATAACAATTAAGGCACGCGGTGAATGCCAAGAG species len reads
-----CAGCCCTGAGGGCCCCTCTG----- morL 20 36
-----AGCCCTGAGGGCCCCTCTG----- morL 19 18
-----CGCAGCCCTGAGGGCCCCTCTG----- morL 22 3
-----CCGCAGCCCTGAGGGCCCCTCTGC----- morL 24 3
-----CGCAGCCCTGAGGGCCCCTCTGC----- morL 23 2
-----GCAGCCCTGAGGGCCCCTCTG----- morL 21 2
-----GCCCTGAGGGCCCCTCTG----- morL 18 2
-----CAGCCCTGAGGGCCCCTC----- morL 18 1
-----CAGCCCTGAGGGCCCCTCTGC----- morL 21 1
-----CCGCAGCCCTGAGGGCCCCTCTG----- morL 23 1
-----CAGCCCTGAGGGCCCCTCT----- morL 19 1
CCGCCCGCCGCAGCCCTGAGGGCCCCTC----- morL 28 1
-----CGTGTTCACAGCGGACCTTGA----- mirL 21 18100
-----CGTGTTCACAGCGGACCTTGAT----- mirL 22 12423
-----CGTGTTCACAGCGGACCTTG----- mirL 20 4595
-----CGTGTTCACAGCGGACCTTGATT----- mirL 23 1056
-----CGTGTTCACAGCGGACCTT----- mirL 19 1051
-----CGTGTTCACAGCGGACCT----- mirL 18 396
-----CGTGTTCACAGCGGACCTTGATT----- mirL 24 145
-----GTGTTCACAGCGGACCTTGAT----- mirL 21 95
-----GTGTTCACAGCGGACCTTGA----- mirL 20 63
-----GTTTCACAGCGGACCTTGA----- mirL 18 61
-----TGTTTCACAGCGGACCTTGA----- mirL 19 47
-----TGTTTCACAGCGGACCTTGAT----- mirL 20 46
-----TGTTTCACAGCGGACCTTGATT----- mirL 21 35
-----GTGTTCACAGCGGACCTTG----- mirL 19 29
-----GTGTTCACAGCGGACCTTGATT----- mirL 22 19
-----TGTTTCACAGCGGACCTTG----- mirL 18 14
-----GTTTCACAGCGGACCTTGAT----- mirL 19 9
-----TGTTTCACAGCGGACCTTGATT----- mirL 22 9
-----GTGTTCACAGCGGACCTTGATT----- mirL 23 8
-----GCGTGTTCACAGCGGACCTTGAT----- mirL 23 6
-----GCGTGTTCACAGCGGACCTTGA----- mirL 22 5
-----GTGTTCACAGCGGACCTT----- mirL 18 5
-----GTGTTCACAGCGGACCTTGATT----- mirL 24 2
-----GTTTCACAGCGGACCTTGATT----- mirL 21 2
-----GCGTGTTCACAGCGGACCT----- mirL 19 1
-----TGTTTCACAGCGGACCTTGATT----- mirL 23 1
-----GCGTGTTCACAGCGGACCTTG----- mirL 21 1
-----TTAATGTCTATAACAATTA----- loop 18 1
-----TAAGGCACGCGGTGAATGCCA----- mirR 21 2401802
-----TAAGGCACGCGGTGAATGCCAA----- mirR 22 916754
-----TAAGGCACGCGGTGAATGCC----- mirR 20 704628

```

```
-----TAAGGCACGCGGTGAATGC----- mirR 19 502356
-----TAAGGCACGCGGTGAATGCCAAG-- mirR 23 493991
-----TTAAGGCACGCGGTGAATGCCA---- mirR 22 242692
-----AAGGCACGCGGTGAATGCCA---- mirR 20 133454
-----TTAAGGCACGCGGTGAATGCC----- mirR 21 94523
-----TTAAGGCACGCGGTGAATGCCAAG-- mirR 23 88902
-----TAAGGCACGCGGTGAATGCCAAGA- mirR 24 78279
-----TTAAGGCACGCGGTGAATGCC----- mirR 20 66778
-----AAGGCACGCGGTGAATGCCAAG-- mirR 21 62519
-----TTAAGGCACGCGGTGAATGCCAAG-- mirR 24 45667
-----AAGGCACGCGGTGAATGCCAAG-- mirR 22 40705
-----AAGGCACGCGGTGAATGCC----- mirR 19 33968
-----TAAGGCACGCGGTGAATGC----- mirR 18 32355
-----AAGGCACGCGGTGAATGC----- mirR 18 18099
-----TTAAGGCACGCGGTGAATGCCAAGA- mirR 25 10317
-----AAGGCACGCGGTGAATGCCAAGA- mirR 23 6321
-----TTAAGGCACGCGGTGAATGC----- mirR 19 3630
-----AGGCACGCGGTGAATGCCA---- mirR 19 864
-----AAGGCACGCGGTGAATGCCAAGAG mirR 24 536
-----ATTAAGGCACGCGGTGAATGCCA---- mirR 23 398
-----GGCACGCGGTGAATGCCA---- mirR 18 342
-----AGGCACGCGGTGAATGCCAAG-- mirR 20 277
-----ATTAAGGCACGCGGTGAATGCC----- mirR 22 208
-----AGGCACGCGGTGAATGCC----- mirR 18 196
-----ATTAAGGCACGCGGTGAATGCCAAG-- mirR 24 184
-----AGGCACGCGGTGAATGCCAAG-- mirR 21 145
-----AATTAAGGCACGCGGTGAATGCCA---- mirR 24 136
-----GGCACGCGGTGAATGCCAAG-- mirR 19 106
-----AATTAAGGCACGCGGTGAATGCC----- mirR 23 97
-----ATTAAGGCACGCGGTGAATGC----- mirR 21 89
-----ATTAAGGCACGCGGTGAATGCCAAG-- mirR 25 72
-----GGCACGCGGTGAATGCCAAG-- mirR 20 55
-----AATTAAGGCACGCGGTGAATGCCAAG-- mirR 25 52
-----AGGCACGCGGTGAATGCCAAGA- mirR 22 37
-----GGCACGCGGTGAATGCCAAGA- mirR 21 20
-----AATTAAGGCACGCGGTGAATGC----- mirR 22 18
-----AATTAAGGCACGCGGTGAATGCCAAG-- mirR 26 17
-----ATTAAGGCACGCGGTGAATGCCAAGA- mirR 26 11
-----ATTAAGGCACGCGGTGAA----- mirR 18 8
-----AGGCACGCGGTGAATGCCAAGAG mirR 23 4
-----AATTAAGGCACGCGGTGAAT----- mirR 20 3
-----AATTAAGGCACGCGGTGAA----- mirR 19 2
```

>mmu-mir-124-2

```
AGATCAGAGACTCTGCTCTCCGTGTTACAGCGGACCTTGATTTAATGTCATACAATTAAGGCACGCGGTGAATGCCAAGAGCGGAGCCTACGGCTGCACTTGAAGGACATC species len reads
AGATCAGAGACTCTGCTC----- morL 18 3
```

```

--ATCAGAGACTCTGCTCTC----- morL 18 2
---TCAGAGACTCTGCTCTCC----- morL 18 1
AGATCAGAGACTCTGCTCTCC----- morL 21 1
-GATCAGAGACTCTGCTCT----- morL 18 1
-----CGTGTTACAGCGGACCTTGA----- mirL 21 18100
-----CGTGTTACAGCGGACCTTGAT----- mirL 22 12423
-----CGTGTTACAGCGGACCTTG----- mirL 20 4595
-----CGTGTTACAGCGGACCTTGATT----- mirL 23 1056
-----CGTGTTACAGCGGACCTT----- mirL 19 1051
-----CGTGTTACAGCGGACCT----- mirL 18 396
-----CGTGTTACAGCGGACCTTGATTT----- mirL 24 145
-----GTGTTACAGCGGACCTTGAT----- mirL 21 95
-----GTGTTACAGCGGACCTTGA----- mirL 20 63
-----GTTACAGCGGACCTTGA----- mirL 18 61
-----TGTTACAGCGGACCTTGA----- mirL 19 47
-----TGTTACAGCGGACCTTGAT----- mirL 20 46
-----TGTTACAGCGGACCTTGATT----- mirL 21 35
-----GTGTTACAGCGGACCTTG----- mirL 19 29
-----CCGTGTTACAGCGGACCTTGA----- mirL 22 26
-----GTGTTACAGCGGACCTTGATT----- mirL 22 19
-----TGTTACAGCGGACCTTG----- mirL 18 14
-----TGTTACAGCGGACCTTGATT----- mirL 22 9
-----GTTACAGCGGACCTTGAT----- mirL 19 9
-----GTGTTACAGCGGACCTTGATT----- mirL 23 8
-----CCGTGTTACAGCGGACCTTG----- mirL 21 6
-----CCGTGTTACAGCGGACCTTGAT----- mirL 23 5
-----GTGTTACAGCGGACCTT----- mirL 18 5
-----GTTACAGCGGACCTTGATT----- mirL 21 2
-----GTGTTACAGCGGACCTTGATTTA----- mirL 24 2
-----TGTTACAGCGGACCTTGATTTA----- mirL 23 1
-----CTCCGTGTTACAGCGGACCTTGAT----- mirL 25 1
-----TCCGTGTTACAGCGGACC----- mirL 19 1
-----GATTTAATGTCATACAAT----- loop 18 1
-----TAAGGCACGCGGTGAATGCCA----- mirR 21 2401802
-----TAAGGCACGCGGTGAATGCCAA----- mirR 22 916756
-----TAAGGCACGCGGTGAATGCC----- mirR 20 704628
-----TAAGGCACGCGGTGAATGC----- mirR 19 502356
-----TAAGGCACGCGGTGAATGCCAAG----- mirR 23 493988
-----TTAAGGCACGCGGTGAATGCCA----- mirR 22 242692
-----AAGGCACGCGGTGAATGCCA----- mirR 20 133454
-----TTAAGGCACGCGGTGAATGCC----- mirR 21 94523
-----TTAAGGCACGCGGTGAATGCCAA----- mirR 23 88902
-----TAAGGCACGCGGTGAATGCCAAGA----- mirR 24 78266
-----TTAAGGCACGCGGTGAATGC----- mirR 20 66778
-----AAGGCACGCGGTGAATGCCAA----- mirR 21 62519
-----TTAAGGCACGCGGTGAATGCCAAG----- mirR 24 45667

```

```

-----AAGGCACGCGGTGAATGCCAAG----- mirR 22 40705
-----AAGGCACGCGGTGAATGCC----- mirR 19 33967
-----TAAGGCACGCGGTGAATG----- mirR 18 32355
-----AAGGCACGCGGTGAATGC----- mirR 18 18099
-----TTAAGGCACGCGGTGAATGCCAAGA----- mirR 25 10317
-----AAGGCACGCGGTGAATGCCAAGA----- mirR 23 6321
-----TTAAGGCACGCGGTGAATG----- mirR 19 3630
-----AGGCACGCGGTGAATGCCA----- mirR 19 864
-----AAGGCACGCGGTGAATGCCAAGAG----- mirR 24 536
-----ATTAAGGCACGCGGTGAATGCCA----- mirR 23 398
-----GGCACGCGGTGAATGCCA----- mirR 18 342
-----AGGCACGCGGTGAATGCCAA----- mirR 20 277
-----ATTAAGGCACGCGGTGAATGCC----- mirR 22 208
-----AGGCACGCGGTGAATGCC----- mirR 18 196
-----ATTAAGGCACGCGGTGAATGCCAA----- mirR 24 184
-----AGGCACGCGGTGAATGCCAAG----- mirR 21 145
-----AATTAAGGCACGCGGTGAATGCCA----- mirR 24 136
-----GGCACGCGGTGAATGCCAA----- mirR 19 106
-----AATTAAGGCACGCGGTGAATGCC----- mirR 23 97
-----ATTAAGGCACGCGGTGAATGC----- mirR 21 89
-----ATTAAGGCACGCGGTGAATGCCAAG----- mirR 25 72
-----GGCACGCGGTGAATGCCAAG----- mirR 20 55
-----AATTAAGGCACGCGGTGAATGCCAA----- mirR 25 52
-----AGGCACGCGGTGAATGCCAAGA----- mirR 22 37
-----GGCACGCGGTGAATGCCAAGA----- mirR 21 20
-----AATTAAGGCACGCGGTGAATGC----- mirR 22 18
-----AATTAAGGCACGCGGTGAATGCCAAG----- mirR 26 17
-----ATTAAGGCACGCGGTGAATGCCAAGA----- mirR 26 11
-----ATTAAGGCACGCGGTGAA----- mirR 18 8
-----AGGCACGCGGTGAATGCCAAGAG----- mirR 23 4
-----AATTAAGGCACGCGGTGAAT----- mirR 20 3
-----AATTAAGGCACGCGGTGAA----- mirR 19 2
-----GAGCGGAGCCTACGGCTGCAC----- morR 21 4
-----GAGCGGAGCCTACGGCTGCACTT----- morR 23 4
-----GAGCGGAGCCTACGGCTGCACTTG----- morR 24 2
-----GAGCGGAGCCTACGGCTGCA----- morR 20 2
-----GAGCGGAGCCTACGGCTGCACTTGAAGGACATC morR 33 1
-----GAGCGGAGCCTACGGCTGC----- morR 19 1
-----CCAAGAGCGGAGCCTACGG----- morR 19 1

```

>mmu-mir-29a

```

CTTGTGACCCCTTAGAGGATGACTGATTTCTTTTGGTGTTTCAGAGTCAATAGAATTTTCTAGCACCATCTGAAATCGGTTATAATGATTGGGGAAGAGCACC species len reads
---GTGACCCCTTAGAGGATG----- morL 18 1
CTTGTGACCCCTTAGAGG----- morL 18 1
-----ACTGATTTCTTTTGGTGTTTC----- mirL 20 1992
-----ACTGATTTCTTTTGGTGTTTCAG----- mirL 22 1945

```

```

-----ACTGATTTCTTTGGTGTTC----- mirL 21 1655
-----ACTGATTTCTTTGGTGTTCAGA----- mirL 23 1179
-----ACTGATTTCTTTGGTGTTCAGAGT----- mirL 25 659
-----ACTGATTTCTTTGGTGTTCAGAG----- mirL 19 481
-----ACTGATTTCTTTGGTGTTCAGAG----- mirL 24 413
-----TGATTTCTTTGGTGTTCAG----- mirL 20 23
-----CTGATTTCTTTGGTGTTCAG----- mirL 21 17
-----TGATTTCTTTGGTGTTCAGAGT----- mirL 23 13
-----CTGATTTCTTTGGTGTTCAG----- mirL 20 11
-----TGATTTCTTTGGTGTTCAGAGT----- mirL 24 9
-----CTGATTTCTTTGGTGTTC----- mirL 19 9
-----TGATTTCTTTGGTGTTCAGAG----- mirL 22 8
-----TGATTTCTTTGGTGTTCAGAG----- mirL 21 7
-----GACTGATTTCTTTGGTGTTCAG----- mirL 22 7
-----TGATTTCTTTGGTGTTC----- mirL 18 7
-----CTGATTTCTTTGGTGTTCAGAG----- mirL 23 7
-----CTGATTTCTTTGGTGTTC----- mirL 18 6
-----GATTTCTTTGGTGTTCAG----- mirL 18 5
-----GATTTCTTTGGTGTTCAG----- mirL 19 5
-----TGATTTCTTTGGTGTTCAG----- mirL 19 4
-----GATTTCTTTGGTGTTCAGAGTCA----- mirL 24 4
-----GACTGATTTCTTTGGTGTTCAG----- mirL 23 4
-----GACTGATTTCTTTGGTGTTC----- mirL 20 4
-----GACTGATTTCTTTGGTGTTCAGAG----- mirL 24 2
-----GATTTCTTTGGTGTTCAGAGT----- mirL 22 2
-----GACTGATTTCTTTGGTGTTCAGAG----- mirL 25 2
-----TGACTGATTTCTTTGGTGTTC----- mirL 21 1
-----ATGACTGATTTCTTTGG----- mirL 18 1
-----GATTTCTTTGGTGTTCAGAGTCAA----- mirL 25 1
-----ATGACTGATTTCTTTGGTGTTCAG----- mirL 25 1
-----GATTTCTTTGGTGTTCAGAG----- mirL 21 1
-----GATTTCTTTGGTGTTCAGAGT----- mirL 23 1
-----GACTGATTTCTTTGGTGTTC----- mirL 21 1
-----CTGATTTCTTTGGTGTTCAGAGT----- mirL 24 1
-----CTGATTTCTTTGGTGTTCAGAGT----- mirL 25 1
-----TAGCACCATCTGAAATCGGTTA----- mirR 22 3942120
-----TAGCACCATCTGAAATCGGTT----- mirR 21 1200277
-----TAGCACCATCTGAAATCGGTTAT----- mirR 23 235065
-----AGCACCATCTGAAATCGGTTA----- mirR 21 121987
-----TAGCACCATCTGAAATCGGT----- mirR 20 60445
-----TAGCACCATCTGAAATCGG----- mirR 19 53821
-----CTAGCACCATCTGAAATCGGTT----- mirR 22 52158
-----CTAGCACCATCTGAAATCGGTTA----- mirR 23 51954
-----AGCACCATCTGAAATCGGTT----- mirR 20 51843
-----TAGCACCATCTGAAATCG----- mirR 18 13654
-----TAGCACCATCTGAAATCGGTTATA----- mirR 24 8708

```

```

-----AGCACCATCTGAAATCGGTTAT----- mirR 22 7736
-----CTAGCACCATCTGAAATC----- mirR 18 3161
-----CTAGCACCATCTGAAATCGGT----- mirR 21 2945
-----CTAGCACCATCTGAAATCGG----- mirR 20 2527
-----GCACCATCTGAAATCGGTTA----- mirR 20 2422
-----CTAGCACCATCTGAAATCG----- mirR 19 2302
-----AGCACCATCTGAAATCGGT----- mirR 19 2128
-----CTAGCACCATCTGAAATCGGTTAT----- mirR 24 2120
-----AGCACCATCTGAAATCGG----- mirR 18 715
-----GCACCATCTGAAATCGGTT----- mirR 19 657
-----TCTAGCACCATCTGAAATCGGTTA----- mirR 24 391
-----AGCACCATCTGAAATCGGTTATA----- mirR 23 311
-----TCTAGCACCATCTGAAATCGGTT----- mirR 23 160
-----GCACCATCTGAAATCGGTTAT----- mirR 21 153
-----CACCATCTGAAATCGGTTA----- mirR 19 147
-----CACCATCTGAAATCGGTT----- mirR 18 128
-----TCTAGCACCATCTGAAATCGGTTAT----- mirR 25 77
-----AGCACCATCTGAAATCGGTTATAAT----- mirR 25 33
-----GCACCATCTGAAATCGGT----- mirR 18 32
-----CACCATCTGAAATCGGTTAT----- mirR 20 9
-----GCACCATCTGAAATCGGTTATA----- mirR 22 6
-----TCTAGCACCATCTGAAAT----- mirR 18 6
-----TCTAGCACCATCTGAAATCGG----- mirR 21 6
-----TCTAGCACCATCTGAAATCGGT----- mirR 22 5
-----TCTAGCACCATCTGAAATC----- mirR 19 4
-----GCACCATCTGAAATCGGTTATAA----- mirR 23 2
-----TTCTAGCACCATCTGAAATCGGTTA----- mirR 25 1
-----TGATTGGGGAAGAGCACC morR 18 1
-----ATGATTGGGGAAGAGCAC- morR 18 1

```

>mmu-mir-125b-2

```

AGAAGAATTCTCCTGCATCACACGAGACTTTGCCTAGTCCCTGAGACCCTAACTTGTGAGGTATTTTAGTAACATCACAAGTCAGGTTCTTGGGACCTAGGC species len reads
-----CACACGAGACTTTGCCTAG----- morL 19 77
-----ACACGAGACTTTGCCTAG----- morL 18 30
-----TCACACGAGACTTTGCCTAG----- morL 20 14
-----GCATCACACGAGACTTTGCCTAG----- morL 23 6
-----CATCACACGAGACTTTGCCTAG----- morL 22 5
-----ATCACACGAGACTTTGCCTAG----- morL 21 4
-----CACACGAGACTTTGCCTAGT----- morL 20 2
-----ATCACACGAGACTTTGCCTAGT----- morL 22 2
-----TCACACGAGACTTTGCCTAGT----- morL 21 1
-----TCACACGAGACTTTGCCT----- morL 18 1
-----GCATCACACGAGACTTTGCCTA----- morL 22 1
AGAAGAATTCTCCTGCATCACACGAGACTTTGCC morL 34 1
-----TCACACGAGACTTTGCCTAGTC----- morL 22 1
-----TGCATCACACGAGACTTTGCCTAG----- morL 24 1

```

```

-----CACACGAGACTTTGCCTA----- morL 18 1
-----ATCACACGAGACTTTGCCTA----- morL 20 1
-----ATCACACGAGACTTTGCCT----- morL 19 1
-----CATCACACGAGACTTTGCC----- morL 19 1
-----TCCCTGAGACCCTAACTTGTGA----- mirL 22 2510092
-----TCCCTGAGACCCTAACTTGTG----- mirL 21 454826
-----TCCCTGAGACCCTAACTTGT----- mirL 20 434882
-----TCCCTGAGACCCTAACTTGTGAG----- mirL 23 382667
-----CCCTGAGACCCTAACTTGTGA----- mirL 21 145179
-----TCCCTGAGACCCTAACTTGTGAGG----- mirL 24 64831
-----TCCCTGAGACCCTAACTTG----- mirL 19 62430
-----TCCCTGAGACCCTAACTT----- mirL 18 24922
-----CCCTGAGACCCTAACTTGTG----- mirL 20 22513
-----CCCTGAGACCCTAACTTGTGAG----- mirL 22 21798
-----CCCTGAGACCCTAACTTGT----- mirL 19 13530
-----CCCTGAGACCCTAACTTGTGAGG----- mirL 23 6383
-----CCCTGAGACCCTAACTTG----- mirL 18 2360
-----CCTGAGACCCTAACTTGTGA----- mirL 20 1140
-----CCCTGAGACCCTAACTTGTGAGGT----- mirL 24 785
-----GTCCCTGAGACCCTAACTTGTGA----- mirL 23 436
-----CTGAGACCCTAACTTGTGA----- mirL 19 331
-----CCTGAGACCCTAACTTGTG----- mirL 19 164
-----GTCCCTGAGACCCTAACTTGTG----- mirL 22 118
-----CCTGAGACCCTAACTTGT----- mirL 18 112
-----CCTGAGACCCTAACTTGTGAG----- mirL 21 97
-----GTCCCTGAGACCCTAACTTGT----- mirL 21 96
-----CTGAGACCCTAACTTGTG----- mirL 18 69
-----GTCCCTGAGACCCTAACTTGTGAG----- mirL 24 62
-----CTGAGACCCTAACTTGTGAG----- mirL 20 46
-----CCTGAGACCCTAACTTGTGAGG----- mirL 22 44
-----AGTCCCTGAGACCCTAACTTGTGA----- mirL 24 23
-----AGTCCCTGAGACCCTAACTTGT----- mirL 22 17
-----GTCCCTGAGACCCTAACTTGTGAGG----- mirL 25 15
-----CTGAGACCCTAACTTGTGAGGT----- mirL 22 15
-----CTGAGACCCTAACTTGTGAGG----- mirL 21 15
-----AGTCCCTGAGACCCTAACTTGTGAG----- mirL 25 11
-----GTCCCTGAGACCCTAACTTG----- mirL 20 9
-----GTCCCTGAGACCCTAACTT----- mirL 19 8
-----CTGAGACCCTAACTTGTGAGGTAT----- mirL 24 7
-----CCTGAGACCCTAACTTGTGAGGT----- mirL 23 7
-----AGTCCCTGAGACCCTAAC----- mirL 18 4
-----AGTCCCTGAGACCCTAACTTGTGAGG----- mirL 26 4
-----AGTCCCTGAGACCCTAACTTGTG----- mirL 23 3
-----TAGTCCCTGAGACCCTAACTTG----- mirL 22 2
-----AGTCCCTGAGACCCTAACTTG----- mirL 21 2
-----CTGAGACCCTAACTTGTGAGGTA----- mirL 23 2

```

```

-----TAGTCCCTGAGACCCTAACTTGTGA----- mirL 25 1
-----ACAAGTCAGGTTCTTGGGACC----- mirR 21 3461
-----ACAAGTCAGGTTCTTGGGACCT----- mirR 22 1965
-----ACAAGTCAGGTTCTTGGGAC----- mirR 20 1625
-----ACAAGTCAGGTTCTTGGGACCTA--- mirR 23 710
-----TCACAAGTCAGGTTCTTGGGACC----- mirR 23 472
-----ACAAGTCAGGTTCTTGGGACCTAG-- mirR 24 448
-----ACAAGTCAGGTTCTTGGGA----- mirR 19 387
-----ATCACAAGTCAGGTTCTTGGGAC----- mirR 23 322
-----TCACAAGTCAGGTTCTTGGGAC----- mirR 22 308
-----ATCACAAGTCAGGTTCTTGGGACC----- mirR 24 235
-----TCACAAGTCAGGTTCTTGGGA----- mirR 21 172
-----ATCACAAGTCAGGTTCTTGGGA----- mirR 22 169
-----ATCACAAGTCAGGTTCTTGG----- mirR 20 135
-----ATCACAAGTCAGGTTCTTGGG----- mirR 21 118
-----ACAAGTCAGGTTCTTGGGACCTAGG- mirR 25 111
-----TCACAAGTCAGGTTCTTGGG----- mirR 20 97
-----TCACAAGTCAGGTTCTTGGGACCT--- mirR 24 80
-----TCACAAGTCAGGTTCTTG----- mirR 18 78
-----TCACAAGTCAGGTTCTTGG----- mirR 19 53
-----ATCACAAGTCAGGTTCTTGGGACCT--- mirR 25 51
-----AGTCAGGTTCTTGGGACCT----- mirR 19 26
-----CACAAGTCAGGTTCTTGGGACC----- mirR 22 24
-----ATCACAAGTCAGGTTCTTG----- mirR 19 22
-----CAAGTCAGGTTCTTGGGAC----- mirR 19 15
-----CAAGTCAGGTTCTTGGGACC----- mirR 20 15
-----AAGTCAGGTTCTTGGGACCT--- mirR 20 12
-----CAAGTCAGGTTCTTGGGACCTA--- mirR 22 11
-----CACAAGTCAGGTTCTTGGGAC----- mirR 21 8
-----CAAGTCAGGTTCTTGGGACCTAG-- mirR 23 7
-----CACAAGTCAGGTTCTTGGGACCT--- mirR 23 6
-----AGTCAGGTTCTTGGGACC----- mirR 18 6
-----AAGTCAGGTTCTTGGGAC----- mirR 18 5
-----CAAGTCAGGTTCTTGGGACCT--- mirR 21 5
-----AGTCAGGTTCTTGGGACCTA--- mirR 20 4
-----AAGTCAGGTTCTTGGGACC----- mirR 19 4
-----CACAAGTCAGGTTCTTGGGA----- mirR 20 3
-----CAAGTCAGGTTCTTGGGA----- mirR 18 3
-----AGTCAGGTTCTTGGGACCTAG-- mirR 21 2
-----AAGTCAGGTTCTTGGGACCTA--- mirR 21 2
-----CACAAGTCAGGTTCTTGG----- mirR 18 2
-----CAAGTCAGGTTCTTGGGACCTAGGC mirR 25 1

>mmu-mir-125b-1
TCGTGTTGCGCTCCCTCAGTCCCTGAGACCCTAACTTGTGATGTTTACCGTTTAAATCCACGGGTTAGGCTCTTGGGAGCTGCGGGTCGTGCCTTTGCATC species len reads
--GTGTTGCGCTCCCTCAG----- morL 18 10

```



```

-CGTGTTGCGCTCCCCTCAG----- morL 19 8
--GTGTTGCGCTCCCCTCAGT----- morL 19 4
-CGTGTTGCGCTCCCCTCA----- morL 18 3
--GTGTTGCGCTCCCCTCAGTCC----- morL 21 2
-CGTGTTGCGCTCCCCTCAGT----- morL 20 2
---TGTTGCGCTCCCCTCAGT----- morL 18 2
TCGTGTTGCGCTCCCCTCAG----- morL 20 1
----TTGCGCTCCCCTCAGTCC----- morL 18 1
---TGTTGCGCTCCCCTCAGTC----- morL 19 1
-----TCCCTGAGACCCTAACTTGTGA----- mirL 22 2510526
-----TCCCTGAGACCCTAACTTGTG----- mirL 21 454822
-----TCCCTGAGACCCTAACTTGT----- mirL 20 434863
-----TCCCTGAGACCCTAACTTGTGAT----- mirL 23 355904
-----CCCTGAGACCCTAACTTGTGA----- mirL 21 145188
-----TCCCTGAGACCCTAACTTG----- mirL 19 62338
-----TCCCTGAGACCCTAACTTGTGATG----- mirL 24 27936
-----TCCCTGAGACCCTAACTT----- mirL 18 24922
-----CCCTGAGACCCTAACTTGTG----- mirL 20 22512
-----CCCTGAGACCCTAACTTGTGAT----- mirL 22 21407
-----CCCTGAGACCCTAACTTGT----- mirL 19 13532
-----CCCTGAGACCCTAACTTG----- mirL 18 2360
-----CCCTGAGACCCTAACTTGTGATG----- mirL 23 2080
-----CCTGAGACCCTAACTTGTGA----- mirL 20 1140
-----CCCTGAGACCCTAACTTGTGATG----- mirL 24 607
-----GTCCCTGAGACCCTAACTTGTGA----- mirL 23 436
-----CTGAGACCCTAACTTGTGA----- mirL 19 331
-----CCTGAGACCCTAACTTGTG----- mirL 19 164
-----GTCCCTGAGACCCTAACTTGTG----- mirL 22 118
-----CCTGAGACCCTAACTTGT----- mirL 18 112
-----GTCCCTGAGACCCTAACTTGT----- mirL 21 96
-----CCTGAGACCCTAACTTGTGAT----- mirL 21 88
-----CTGAGACCCTAACTTGTG----- mirL 18 69
-----GTCCCTGAGACCCTAACTTGTGAT----- mirL 24 55
-----CTGAGACCCTAACTTGTGAT----- mirL 20 39
-----CCTGAGACCCTAACTTGTGATG----- mirL 22 25
-----AGTCCCTGAGACCCTAACTTGTGA----- mirL 24 23
-----AGTCCCTGAGACCCTAACTTGT----- mirL 22 17
-----GTCCCTGAGACCCTAACTTGT----- mirL 20 9
-----GTCCCTGAGACCCTAACTT----- mirL 19 8
-----AGTCCCTGAGACCCTAACTTGTGAT----- mirL 25 7
-----GTCCCTGAGACCCTAACTTGTGATG----- mirL 25 5
-----CTGAGACCCTAACTTGTGATG----- mirL 21 5
-----CCTGAGACCCTAACTTGTGATG----- mirL 23 5
-----CTGAGACCCTAACTTGTGATGT----- mirL 22 4
-----AGTCCCTGAGACCCTAAC----- mirL 18 4
-----AGTCCCTGAGACCCTAACTTGTG----- mirL 23 3

```

```
-----AGTCCCTGAGACCCTAACTT----- mirL 20 2
-----CTGAGACCCTAACTTGTGATGTT----- mirL 23 2
-----CAGTCCCTGAGACCCTAACTTG----- mirL 22 2
-----AGTCCCTGAGACCCTAACTTG----- mirL 21 2
-----CAGTCCCTGAGACCCTAACTTGTGA----- mirL 25 1
-----CTGAGACCCTAACTTGTGATGTTT----- mirL 24 1
-----CAGTCCCTGAGACCCTAA----- mirL 18 1
-----TGATGTTTACCGTTTAAA----- loop 18 1
-----ATGTTTACCGTTTAAATC----- loop 18 1
-----TGTTTACCGTTTAAATCC----- loop 18 1
-----TGTTTACCGTTTAAATCCAC----- loop 20 1
-----ACGGGTTAGGCTCTTGGGAGC----- mirR 21 501
-----ACGGGTTAGGCTCTTGGGAGCT----- mirR 22 355
-----ACGGGTTAGGCTCTTGGGAG----- mirR 20 275
-----ACGGGTTAGGCTCTTGGGAGCTG----- mirR 23 164
-----ACGGGTTAGGCTCTTGGGA----- mirR 19 143
-----ACGGGTTAGGCTCTTGGGAGCTGC----- mirR 24 68
-----CACGGGTTAGGCTCTTGGGAGC----- mirR 22 58
-----ACGGGTTAGGCTCTTGGG----- mirR 18 45
-----CACGGGTTAGGCTCTTGGGA----- mirR 20 40
-----CACGGGTTAGGCTCTTGGGAG----- mirR 21 32
-----TCCACGGGTTAGGCTCTTGGGA----- mirR 22 9
-----CACGGGTTAGGCTCTTGGGAGCT----- mirR 23 8
-----CGGGTTAGGCTCTTGGGAGCTG----- mirR 22 7
-----CACGGGTTAGGCTCTTGGGAGCTG----- mirR 24 6
-----TCCACGGGTTAGGCTCTTGG----- mirR 20 6
-----CACGGGTTAGGCTCTTGGG----- mirR 19 6
-----TCCACGGGTTAGGCTCTTGGG----- mirR 21 5
-----TCCACGGGTTAGGCTCTTGGGAGC----- mirR 24 3
-----CGGGTTAGGCTCTTGGGAGCT----- mirR 21 3
-----CACGGGTTAGGCTCTTGG----- mirR 18 3
-----TCCACGGGTTAGGCTCTTGGGAG----- mirR 23 3
-----TCCACGGGTTAGGCTCTTGGGAGCTGC----- mirR 27 1
-----GGGTTAGGCTCTTGGGAGC----- mirR 19 1
-----GGTTAGGCTCTTGGGAGCT----- mirR 19 1
-----TCCACGGGTTAGGCTCTTGG----- mirR 19 1
-----GGGTTAGGCTCTTGGGAGCT----- mirR 20 1
-----CCACGGGTTAGGCTCTTGG----- mirR 19 1
-----CGGGTTAGGCTCTTGGGAG----- mirR 19 1
-----GGTTAGGCTCTTGGGAGCTG----- mirR 20 1
-----CGGGTTAGGCTCTTGGGA----- mirR 18 1
-----AGCTGCGGGTCGTGCCTT----- morR 18 1
-----GCGGGTCGTGCCTTTGCATC----- morR 20 1
-----CGGGTCGTGCCTTTGCAT----- morR 18 1
```

>mmu-mir-29c

|                                                                                                       | species | len | reads   |
|-------------------------------------------------------------------------------------------------------|---------|-----|---------|
| GGTCCATCTCTTACACAGGCTGACCGATTTCTCCTGGTGTTCAGAGTCTGTTTTTGTCTAGCACCATTTGAAATCGGTTATGATGTAGGGGGAAGAGCACC | morL    | 18  | 1       |
| ----CATCTCTTACACAGGCTG-----                                                                           | morL    | 20  | 1       |
| -GTCCATCTCTTACACAGGCT-----                                                                            | morL    | 18  | 1       |
| GGTCCATCTCTTACACAG-----                                                                               | mirL    | 22  | 8002    |
| -----TGACCGATTTCTCCTGGTGTTC-----                                                                      | mirL    | 21  | 3287    |
| -----TGACCGATTTCTCCTGGTGTTC-----                                                                      | mirL    | 22  | 2892    |
| -----GACCGATTTCTCCTGGTGTTC-----                                                                       | mirL    | 21  | 2846    |
| -----GACCGATTTCTCCTGGTGTTC-----                                                                       | mirL    | 23  | 2324    |
| -----TGACCGATTTCTCCTGGTGTTC-----                                                                      | mirL    | 20  | 2001    |
| -----GACCGATTTCTCCTGGTGTTC-----                                                                       | mirL    | 20  | 1532    |
| -----TGACCGATTTCTCCTGGTGTTC-----                                                                      | mirL    | 21  | 971     |
| -----ACCGATTTCTCCTGGTGTTC-----                                                                        | mirL    | 19  | 650     |
| -----TGACCGATTTCTCCTGGTGTTC-----                                                                      | mirL    | 19  | 550     |
| -----ACCGATTTCTCCTGGTGTTC-----                                                                        | mirL    | 20  | 436     |
| -----TGACCGATTTCTCCTGGTGTTC-----                                                                      | mirL    | 24  | 416     |
| -----GACCGATTTCTCCTGGTGTTC-----                                                                       | mirL    | 23  | 395     |
| -----ACCGATTTCTCCTGGTGTTC-----                                                                        | mirL    | 23  | 332     |
| -----TGACCGATTTCTCCTGGTGTTC-----                                                                      | mirL    | 18  | 307     |
| -----ACCGATTTCTCCTGGTGTTC-----                                                                        | mirL    | 22  | 232     |
| -----GACCGATTTCTCCTGGTGTTC-----                                                                       | mirL    | 18  | 203     |
| -----ACCGATTTCTCCTGGTGTTC-----                                                                        | mirL    | 19  | 99      |
| -----ACCGATTTCTCCTGGTGTTC-----                                                                        | mirL    | 24  | 54      |
| -----ACCGATTTCTCCTGGTGTTC-----                                                                        | mirL    | 18  | 45      |
| -----GACCGATTTCTCCTGGTGTTC-----                                                                       | mirL    | 24  | 44      |
| -----CCGATTTCTCCTGGTGTTC-----                                                                         | mirL    | 19  | 22      |
| -----CCGATTTCTCCTGGTGTTC-----                                                                         | mirL    | 22  | 6       |
| -----CTGACCGATTTCTCCTGGTGTTC-----                                                                     | mirL    | 22  | 4       |
| -----CTGACCGATTTCTCCTGGTGTTC-----                                                                     | mirL    | 23  | 4       |
| -----GCTGACCGATTTCTCCTG-----                                                                          | mirL    | 18  | 2       |
| -----CCGATTTCTCCTGGTGTTC-----                                                                         | mirL    | 20  | 2       |
| -----CCGATTTCTCCTGGTGTTC-----                                                                         | mirL    | 18  | 1       |
| -----CCGATTTCTCCTGGTGTTC-----                                                                         | mirL    | 25  | 1       |
| -----CTGACCGATTTCTCCTGGT-----                                                                         | mirL    | 19  | 1       |
| -----CCGATTTCTCCTGGTGTTC-----                                                                         | mirL    | 23  | 1       |
| -----CTGACCGATTTCTCCTGGT-----                                                                         | mirL    | 21  | 1       |
| -----CTGACCGATTTCTCCTGGT-----                                                                         | mirL    | 20  | 1       |
| -----CAGAGTCTGTTTTTGTCTAG-----                                                                        | loop    | 20  | 2       |
| -----TAGCACCATTTGAAATCGGTTA-----                                                                      | mirR    | 22  | 1248091 |
| -----TAGCACCATTTGAAATCGGTT-----                                                                       | mirR    | 21  | 458220  |
| -----TAGCACCATTTGAAATCGGTTAT-----                                                                     | mirR    | 23  | 100198  |
| -----AGCACCATTTGAAATCGGTTA-----                                                                       | mirR    | 21  | 52328   |
| -----TAGCACCATTTGAAATCGGTT-----                                                                       | mirR    | 20  | 23626   |
| -----AGCACCATTTGAAATCGGTT-----                                                                        | mirR    | 20  | 22096   |
| -----TAGCACCATTTGAAATCGG-----                                                                         | mirR    | 19  | 17975   |
| -----TAGCACCATTTGAAATCG-----                                                                          | mirR    | 18  | 9613    |

```

-----TAGCACCATTTGAAATCGGTTATG----- mirR 24 7183
-----AGCACCATTTGAAATCGGTTAT----- mirR 22 4214
-----CTAGCACCATTTGAAATCGGTTA----- mirR 23 1440
-----GCACCATTTGAAATCGGTTA----- mirR 20 1300
-----AGCACCATTTGAAATCGGT----- mirR 19 848
-----CTAGCACCATTTGAAATCGGTT----- mirR 22 777
-----GCACCATTTGAAATCGGTTAT----- mirR 21 582
-----GCACCATTTGAAATCGGTTATG----- mirR 22 431
-----GCACCATTTGAAATCGGTT----- mirR 19 313
-----CTAGCACCATTTGAAATCGGT----- mirR 21 284
-----AGCACCATTTGAAATCGGTTATG----- mirR 23 272
-----AGCACCATTTGAAATCGG----- mirR 18 168
-----GCACCATTTGAAATCGGTTATGA----- mirR 23 136
-----CTAGCACCATTTGAAATCGG----- mirR 20 129
-----GCACCATTTGAAATCGGT----- mirR 18 105
-----CTAGCACCATTTGAAATCGGTTAT----- mirR 24 89
-----TCTAGCACCATTTGAAATCGGTTA----- mirR 24 87
-----CACCATTTGAAATCGGTTA----- mirR 19 83
-----TCTAGCACCATTTGAAATCGGTT----- mirR 23 61
-----CACCATTTGAAATCGGTTATGA----- mirR 22 27
-----CTAGCACCATTTGAAATCG----- mirR 19 21
-----CACCATTTGAAATCGGTTAT----- mirR 20 19
-----GCACCATTTGAAATCGGTTATGAT----- mirR 24 19
-----AGCACCATTTGAAATCGGTTATGA----- mirR 24 15
-----TCTAGCACCATTTGAAATCGGTTAT----- mirR 25 13
-----CACCATTTGAAATCGGTT----- mirR 18 10
-----CACCATTTGAAATCGGTTATG----- mirR 21 10
-----CTAGCACCATTTGAAATCGGTTATG----- mirR 25 8
-----TCTAGCACCATTTGAAATCGGT----- mirR 22 3
-----GTCTAGCACCATTTGAAATCGGTTA----- mirR 25 2
-----CACCATTTGAAATCGGTTATGAT----- mirR 23 2
-----TCTAGCACCATTTGAAATCGG----- mirR 21 1
-----GTCTAGCACCATTTGAAATCGGTT----- mirR 24 1
-----TGATGTAGGGGAAGAGCACC morR 21 1
-----TGTAGGGGAAGAGCACC morR 18 1

```

```

>mmu-mir-138-1
CTCTAGCATGGTGTGTGGGACAGCTGGTGTGTGAATCAGGCCGTTGCCAATCAGAGAACGGCTACTTCACAACACCAGGGCCACACTGCAAGCAGCGAGC species len reads
---TAGCATGGTGTGTGGGAC----- morL 19 3
---TAGCATGGTGTGTGGGACA----- morL 20 2
---CTAGCATGGTGTGTGGGA----- morL 19 2
---TAGCATGGTGTGTGGGA----- morL 18 1
---GCATGGTGTGTGGGACA----- morL 18 1
CTCTAGCATGGTGTGTGGGACA----- morL 23 1
-TCTAGCATGGTGTGTGGGAC----- morL 21 1
-----AGCTGGTGTGTGAATCAGGCC----- mirL 22 539037

```

```

-----AGCTGGTGTGTGAATCAGGCCG----- mirL 23 459745
-----AGCTGGTGTGTGAATCAGGC----- mirL 21 322674
-----AGCTGGTGTGTGAATCAGGCCGT----- mirL 24 266695
-----AGCTGGTGTGTGAATCAGGCCGTT----- mirL 25 138949
-----AGCTGGTGTGTGAATCAGG----- mirL 20 63012
-----AGCTGGTGTGTGAATCAGGCCGTTG----- mirL 26 58911
-----GCTGGTGTGTGAATCAGGCCG----- mirL 22 458
-----GCTGGTGTGTGAATCAGGCC----- mirL 21 335
-----CAGCTGGTGTGTGAATCAGGC----- mirL 22 285
-----GCTGGTGTGTGAATCAGGCCGT----- mirL 23 250
-----GCTGGTGTGTGAATCAGGC----- mirL 20 221
-----CAGCTGGTGTGTGAATCAGGCCG----- mirL 24 156
-----CAGCTGGTGTGTGAATCAGGCC----- mirL 23 129
-----CAGCTGGTGTGTGAATCAGGCCGT----- mirL 25 79
-----TGGTGTGTGTGAATCAGGCCG----- mirL 20 51
-----GCTGGTGTGTGAATCAGGCCGTT----- mirL 24 34
-----GCTGGTGTGTGAATCAGG----- mirL 19 34
-----CAGCTGGTGTGTGAATCAGG----- mirL 21 33
-----CTGGTGTGTGAATCAGGCCGT----- mirL 22 32
-----GCTGGTGTGTGAATCAGGCCGTTG----- mirL 25 30
-----CTGGTGTGTGAATCAGGCCG----- mirL 21 29
-----TGGTGTGTGTGAATCAGGCCGT----- mirL 21 28
-----CTGGTGTGTGAATCAGGC----- mirL 19 27
-----TGGTGTGTGTGAATCAGGCC----- mirL 19 22
-----CAGCTGGTGTGTGAATCAG----- mirL 20 21
-----CAGCTGGTGTGTGAATCAGGCCGTT----- mirL 26 17
-----CTGGTGTGTGAATCAGGCC----- mirL 20 17
-----TGGTGTGTGTGAATCAGGCCGTT----- mirL 22 13
-----ACAGCTGGTGTGTGAATCAGGCCG----- mirL 25 10
-----TGGTGTGTGTGAATCAGGC----- mirL 18 8
-----ACAGCTGGTGTGTGAATCAGGC----- mirL 23 8
-----CTGGTGTGTGTGAATCAGGCCGTTG----- mirL 24 7
-----ACAGCTGGTGTGTGAATCAGGCCGT----- mirL 26 6
-----GACAGCTGGTGTGTGAATCAGGCC----- mirL 25 4
-----TGGTGTGTGTGAATCAGGCCGTTG----- mirL 23 4
-----ACAGCTGGTGTGTGAATCAG----- mirL 21 4
-----TGGTGTGTGTGAATCAGGCCGTTGC----- mirL 24 3
-----ACAGCTGGTGTGTGAATCAGGCC----- mirL 24 3
-----ACAGCTGGTGTGTGAATCA----- mirL 20 3
-----CTGGTGTGTGTGAATCAGGCCGTT----- mirL 23 2
-----CTGGTGTGTGTGAATCAGGCCGTTGC----- mirL 25 2
-----GACAGCTGGTGTGTGAATCAGGCCG----- mirL 26 2
-----ACAGCTGGTGTGTGAATCAGG----- mirL 22 1
-----GACAGCTGGTGTGTGAATCAGGCCGT----- mirL 27 1
-----GACAGCTGGTGTGTGAATCAG----- mirL 22 1
-----GACAGCTGGTGTGTGAATC----- mirL 20 1

```

```

-----GACAGCTGGTGTGTGAATCAGGC----- mirL 24 1
-----TTGCCAATCAGAGAACGG----- loop 18 4
-----TTGCCAATCAGAGAACGGC----- loop 19 2
-----GCTACTTCACAACACCAGGGC----- mirR 22 5394
-----GCTACTTCACAACACCAGGGC----- mirR 21 5077
-----GCTACTTCACAACACCAGGGCCA----- mirR 23 1697
-----CGGCTACTTCACAACACCAG----- mirR 20 1055
-----GCTACTTCACAACACCAGGG----- mirR 20 784
-----CGGCTACTTCACAACACCAGG----- mirR 21 685
-----GCTACTTCACAACACCAGG----- mirR 19 637
-----CGGCTACTTCACAACACCAGGG----- mirR 22 632
-----CGGCTACTTCACAACACCAGGGC----- mirR 23 581
-----CGGCTACTTCACAACACCA----- mirR 19 499
-----GCTACTTCACAACACCAG----- mirR 18 400
-----GCTACTTCACAACACCAGGGCCAC----- mirR 24 372
-----CGGCTACTTCACAACACCAGGGC----- mirR 24 190
-----CGGCTACTTCACAACACC----- mirR 18 168
-----ACTTCACAACACCAGGGC----- mirR 19 60
-----CTACTTCACAACACCAGGGC----- mirR 21 59
-----ACTTCACAACACCAGGGC----- mirR 18 38
-----GGCTACTTCACAACACCAG----- mirR 19 35
-----CTACTTCACAACACCAGGGC----- mirR 20 34
-----CTACTTCACAACACCAGGGCCA----- mirR 22 31
-----TACTTCACAACACCAGGGC----- mirR 20 27
-----TACTTCACAACACCAGGGC----- mirR 19 24
-----ACTTCACAACACCAGGGCCA----- mirR 20 22
-----GGCTACTTCACAACACCAGGGC----- mirR 22 20
-----CTACTTCACAACACCAGG----- mirR 18 19
-----CTACTTCACAACACCAGGG----- mirR 19 18
-----GGCTACTTCACAACACCA----- mirR 18 14
-----GGCTACTTCACAACACCAGGGC----- mirR 23 10
-----GGCTACTTCACAACACCAGG----- mirR 20 10
-----CTACTTCACAACACCAGGGCCAC----- mirR 23 10
-----TACTTCACAACACCAGGG----- mirR 18 10
-----GGCTACTTCACAACACCAGGG----- mirR 21 7
-----TACTTCACAACACCAGGGCCA----- mirR 21 7
-----TACTTCACAACACCAGGGCCAC----- mirR 22 6
-----ACGGCTACTTCACAACACCA----- mirR 20 4
-----CTACTTCACAACACCAGGGCCACA----- mirR 24 1
-----ACGGCTACTTCACAACACCAG----- mirR 21 1
-----ACGGCTACTTCACAACACCAG----- mirR 22 1
-----CACACTGCACTGCAAGCA----- morR 18 5
-----CACTGCACTGCAAGCAGCG----- morR 19 1
-----GCCACACTGCACTGCAAGCA----- morR 20 1
-----GCCACACTGCACTGCAAG----- morR 18 1
-----ACTGCACTGCAAGCAGCGAGC----- morR 21 1

```

```

>mmu-mir-138-2
ACCCATTTCTGGTATGGTTGCTGCAGCTGGTGTGTGAATCAGGCCGACGAGCAGCGCATCCTCTTACCCGGCTATTTACAGACACCAGGGTTGCACCCATCCCATCCTCTCCAG species len reads
----ATTTCTGGTATGGTTGCTGC----- morL 20 42
----ATTTCTGGTATGGTTGCTGCA----- morL 21 6
----CATTTCTGGTATGGTTGCTGC----- morL 21 4
----TTTCTGGTATGGTTGCTGC----- morL 19 4
----CATTTCTGGTATGGTTGCTGCA----- morL 22 2
----ATTTCTGGTATGGTTGCTG----- morL 19 2
----ATTTCTGGTATGGTTGCT----- morL 18 1
----CATTTCTGGTATGGTTGCTG----- morL 20 1
ACCCATTTCTGGTATGGTTGCTGC----- morL 24 1
----TCTGGTATGGTTGCTGCAG----- morL 19 1
----TTTCTGGTATGGTTGCTGCA----- morL 20 1
-----AGCTGGTGTGTGAATCAGGCC----- mirL 22 539038
-----AGCTGGTGTGTGAATCAGGCC----- mirL 23 459731
-----AGCTGGTGTGTGAATCAGGC----- mirL 21 321935
-----AGCTGGTGTGTGAATCAGGCCGA----- mirL 24 190352
-----AGCTGGTGTGTGAATCAGGCCGAC----- mirL 25 168268
-----AGCTGGTGTGTGAATCAGG----- mirL 20 63012
-----AGCTGGTGTGTGAATCAG----- mirL 19 50054
-----GCTGGTGTGTGAATCAGGCCG----- mirL 22 458
-----GCTGGTGTGTGAATCAGGCC----- mirL 21 335
-----CAGCTGGTGTGTGAATCAGGC----- mirL 22 285
-----GCTGGTGTGTGAATCAGGC----- mirL 20 221
-----GCTGGTGTGTGAATCAGGCCGA----- mirL 23 174
-----CAGCTGGTGTGTGAATCAGGCCG----- mirL 24 156
-----GCTGGTGTGTGAATCAGGCCGAC----- mirL 24 154
-----CAGCTGGTGTGTGAATCAGGCC----- mirL 23 129
-----TGGTGTGTGAATCAGGCCG----- mirL 20 51
-----CAGCTGGTGTGTGAATCAGGCCGA----- mirL 25 48
-----CAGCTGGTGTGTGAATCAGGCCGAC----- mirL 26 38
-----GCTGGTGTGTGAATCAGG----- mirL 19 34
-----CAGCTGGTGTGTGAATCAGG----- mirL 21 33
-----CTGGTGTGTGAATCAGGCCG----- mirL 21 29
-----CTGGTGTGTGAATCAGGC----- mirL 19 27
-----GCTGGTGTGTGAATCAGGCCGACG----- mirL 25 25
-----CTGGTGTGTGAATCAGGCCGA----- mirL 22 23
-----TGGTGTGTGAATCAGGCC----- mirL 19 22
-----CAGCTGGTGTGTGAATCAG----- mirL 20 21
-----TGGTGTGTGAATCAGGCCGA----- mirL 21 17
-----CTGGTGTGTGAATCAGGCC----- mirL 20 17
-----TGGTGTGTGAATCAGGCCGAC----- mirL 22 16
-----GCAGCTGGTGTGTGAATCAGGC----- mirL 23 10
-----CTGGTGTGTGAATCAGGCCGAC----- mirL 23 9
-----GCAGCTGGTGTGTGAATCAGGCCG----- mirL 25 9

```

```

-----TGGTGTGTGAATCAGGC----- mirL 18 8
-----TGGTGTGTGAATCAGGCCGACG----- mirL 23 8
-----GCAGCTGGTGTGTGAATCAG----- mirL 21 3
-----GCAGCTGGTGTGTGAATCAGGCC----- mirL 24 3
-----GCAGCTGGTGTGTGAATCAGGCCGACG----- mirL 28 2
-----TGGTGTGTGAATCAGGCCGACGA----- mirL 24 2
-----GCAGCTGGTGTGTGAATCA----- mirL 20 2
-----TGCAGCTGGTGTGTGAATCAGGCC----- mirL 25 1
-----CTGGTGTGTGAATCAGGCCGACGAG----- mirL 26 1
-----CTGGTGTGTGAATCAGG----- mirL 18 1
-----GCAGCTGGTGTGTGAATCAGG----- mirL 22 1
-----TGCAGCTGGTGTGTGAA----- mirL 18 1
-----ACGAGCAGCGCATCCTCTTACC----- loop 22 310
-----ACGAGCAGCGCATCCTCTTACCC----- loop 23 302
-----ACGAGCAGCGCATCCTCTTACCCG----- loop 24 263
-----ACGAGCAGCGCATCCTCTTACCCGG----- loop 25 69
-----ACGAGCAGCGCATCCTCTTAC----- loop 21 46
-----ACGAGCAGCGCATCCTCTTACCCGGC----- loop 26 27
-----CGAGCAGCGCATCCTCTTACCCG----- loop 23 1
-----GCTATTTACGACACCAGGGTT----- mirR 22 3168
-----GCTATTTACGACACCAGGGTTG----- mirR 23 2777
-----GCTATTTACGACACCAGGGT----- mirR 21 1906
-----GCTATTTACGACACCAGG----- mirR 19 641
-----GCTATTTACGACACCAGGGTTGC----- mirR 24 599
-----GCTATTTACGACACCAGGG----- mirR 20 575
-----GCTATTTACGACACCAG----- mirR 18 410
-----CTATTTACGACACCAGGGTTG----- mirR 22 71
-----CTATTTACGACACCAGGGTT----- mirR 21 61
-----CTATTTACGACACCAGGGTTGC----- mirR 23 54
-----TATTTACGACACCAGGGTT----- mirR 20 24
-----ATTTACGACACCAGGGTT----- mirR 19 21
-----TATTTACGACACCAGGGTTG----- mirR 21 21
-----CTATTTACGACACCAGGGT----- mirR 20 13
-----TATTTACGACACCAGGGT----- mirR 19 10
-----CGGCTATTTACGACACC----- mirR 18 10
-----CTATTTACGACACCAGGG----- mirR 19 9
-----ATTTACGACACCAGGGT----- mirR 18 8
-----ATTTACGACACCAGGGTTG----- mirR 20 5
-----TATTTACGACACCAGGGTTGC----- mirR 22 5
-----GGCTATTTACGACACCAGGGTT----- mirR 23 4
-----CTATTTACGACACCAGG----- mirR 18 3
-----GGCTATTTACGACACCAGGGTTG----- mirR 24 3
-----ATTTACGACACCAGGGTTGC----- mirR 21 3
-----GGCTATTTACGACACC----- mirR 18 3
-----CTATTTACGACACCAGGGTTGCA----- mirR 24 3
-----GGCTATTTACGACACCAGGGT----- mirR 22 3

```



```

-----GGCTATTTACGACACCAGGG----- mirR 21 1
-----GGCTATTTACGACACCAGG----- mirR 20 1
-----CGGCTATTTACGACACCA----- mirR 19 1
-----TATTTACGACACCAGGG----- mirR 18 1
-----CGGCTATTTACGACACCAG----- mirR 20 1
-----CGGCTATTTACGACACCAGGGT----- mirR 23 1
-----GCACCCTACCCATCCTCT----- morR 18 1
-----CCCTACCCATCCTCTCCAG morR 19 1

```

>mmu-mir-29b-1

| Sequence                                                                               | species | len | reads  |
|----------------------------------------------------------------------------------------|---------|-----|--------|
| AGCTGGTTTCATATGGTGGTTTAGATTTAAATAGTGATTGTCTAGCACCATTTGAAATCAGTGTTCTTGGTGGAGAACTACTTCGC | mirL    | 22  | 3084   |
| -GCTGGTTTCATATGGTGGTTTA                                                                | mirL    | 23  | 1752   |
| -GCTGGTTTCATATGGTGGTTAG                                                                | mirL    | 21  | 1038   |
| -GCTGGTTTCATATGGTGGTTT                                                                 | mirL    | 24  | 510    |
| -GCTGGTTTCATATGGTGGTTAGATA                                                             | mirL    | 20  | 374    |
| -GCTGGTTTCATATGGTGGTTAGAT                                                              | mirL    | 25  | 335    |
| -GCTGGTTTCATATGGTGGT                                                                   | mirL    | 19  | 201    |
| --CTGGTTTCATATGGTGGTTAGATA                                                             | mirL    | 23  | 110    |
| --CTGGTTTCATATGGTGGTTAG                                                                | mirL    | 22  | 103    |
| ---GGTTTCATATGGTGGTTTA                                                                 | mirL    | 19  | 54     |
| --CTGGTTTCATATGGTGGTTTA                                                                | mirL    | 21  | 34     |
| ---GGTTTCATATGGTGGTTAG                                                                 | mirL    | 20  | 23     |
| ---TGGTTTCATATGGTGGTTAG                                                                | mirL    | 21  | 21     |
| ---TGGTTTCATATGGTGGTTAGATA                                                             | mirL    | 22  | 14     |
| --CTGGTTTCATATGGTGGTTT                                                                 | mirL    | 20  | 12     |
| ---TGGTTTCATATGGTGGTTTA                                                                | mirL    | 20  | 10     |
| ---GGTTTCATATGGTGGTTAGATA                                                              | mirL    | 21  | 8      |
| ---GGTTTCATATGGTGGTTT                                                                  | mirL    | 18  | 8      |
| --CTGGTTTCATATGGTGGTTAGAT                                                              | mirL    | 24  | 7      |
| ---TGGTTTCATATGGTGGTTT                                                                 | mirL    | 19  | 7      |
| --CTGGTTTCATATGGTGGT                                                                   | mirL    | 19  | 5      |
| AGCTGGTTTCATATGGTGGTTAG                                                                | mirL    | 24  | 4      |
| ---TGGTTTCATATGGTGGT                                                                   | mirL    | 18  | 3      |
| --CTGGTTTCATATGGTGGT                                                                   | mirL    | 18  | 3      |
| AGCTGGTTTCATATGGTGGTTTA                                                                | mirL    | 23  | 1      |
| AGCTGGTTTCATATGGTGGTTAGATA                                                             | mirL    | 25  | 1      |
| ---GGTTTCATATGGTGGTTAGAT                                                               | mirL    | 22  | 1      |
| -----AGATTTAAATAGTGATTG-----                                                           | loop    | 18  | 1      |
| -----ATTTAAATAGTGATTGTC-----                                                           | loop    | 18  | 1      |
| -----TAGCACCATTTGAAATCAGTGT-----                                                       | mirR    | 22  | 784276 |
| -----TAGCACCATTTGAAATCAGTGTT-----                                                      | mirR    | 23  | 295687 |
| -----TAGCACCATTTGAAATCAGTGTT-----                                                      | mirR    | 24  | 245036 |
| -----TAGCACCATTTGAAATCAGTG-----                                                        | mirR    | 21  | 127808 |
| -----TAGCACCATTTGAAATCAGT-----                                                         | mirR    | 20  | 76767  |
| -----TAGCACCATTTGAAATCAG-----                                                          | mirR    | 19  | 58713  |

```

-----TAGCACCATTTGAAATCAGTGTTCT----- mirR 25 49918
-----CTAGCACCATTTGAAATCAGTGT----- mirR 23 34810
-----AGCACCATTTGAAATCAGTGT----- mirR 21 28606
-----AGCACCATTTGAAATCAGTGTT----- mirR 22 8789
-----AGCACCATTTGAAATCAGTGTT----- mirR 23 7379
-----CTAGCACCATTTGAAATCAGTGT----- mirR 22 4288
-----CTAGCACCATTTGAAATCAGT----- mirR 21 3117
-----AGCACCATTTGAAATCAGTGT----- mirR 20 3070
-----CTAGCACCATTTGAAATCAGTGTT----- mirR 24 2611
-----CTAGCACCATTTGAAATCAG----- mirR 20 1546
-----AGCACCATTTGAAATCAGT----- mirR 19 1417
-----AGCACCATTTGAAATCAGTGTTCT----- mirR 24 1333
-----AGCACCATTTGAAATCAG----- mirR 18 703
-----GCACCATTTGAAATCAGTGT----- mirR 20 699
-----CTAGCACCATTTGAAATCA----- mirR 19 682
-----CTAGCACCATTTGAAATCAGTGTT----- mirR 25 489
-----GCACCATTTGAAATCAGTGTT----- mirR 21 308
-----GCACCATTTGAAATCAGTGTT----- mirR 22 150
-----TCTAGCACCATTTGAAATCAGTGT----- mirR 24 84
-----CACCATTTGAAATCAGTGT----- mirR 19 81
-----GCACCATTTGAAATCAGT----- mirR 18 80
-----GCACCATTTGAAATCAGTGT----- mirR 19 74
-----TCTAGCACCATTTGAAATCAGTGTT----- mirR 25 28
-----GCACCATTTGAAATCAGTGTTCT----- mirR 23 17
-----CACCATTTGAAATCAGTGTT----- mirR 20 16
-----TCTAGCACCATTTGAAATCAGT----- mirR 22 14
-----CACCATTTGAAATCAGTGTT----- mirR 21 11
-----TCTAGCACCATTTGAAATCA----- mirR 20 9
-----CACCATTTGAAATCAGTGT----- mirR 18 8
-----TCTAGCACCATTTGAAATCAGTGT----- mirR 23 5
-----GCACCATTTGAAATCAGTGTTCTT----- mirR 24 5
-----GTCTAGCACCATTTGAAATCAGTGT----- mirR 25 3
-----TCTAGCACCATTTGAAATCAG----- mirR 21 3
-----TCTAGCACCATTTGAAATCAGTGTT----- mirR 26 2
-----CACCATTTGAAATCAGTGTTCT----- mirR 22 2
-----CACCATTTGAAATCAGTGTTCTT----- mirR 23 1
-----GTCTAGCACCATTTGAAATCAGT----- mirR 23 1
-----TCTTGGTGGAGAACTACT----- morR 18 3
-----CTTGGTGGAGAACTACTTCGC morR 21 1
-----TCTTGGTGGAGAACTACTTC-- morR 20 1

```

```

>mmu-mir-128-2
CCCCGGCAGCCACTGTGCAGTGGGAAGGGGGCCGATGCACTGTAAGAGAGTGAGTAGCAGGTCTCACAGTGAACCGGTCTCTTCCCTACTGTGTCAAACCTCCTA species len reads
-----GCCACTGTGCAGTGGGAAG----- morL 19 7
-----AGCCACTGTGCAGTGGGAAG----- morL 20 6
-----CACTGTGCAGTGGGAAGGG----- morL 19 2

```

|                                        |                 |
|----------------------------------------|-----------------|
| CCCCGGCAGCCACTGTGCAGTGGGAAG-----       | morL 27 2       |
| -----CAGCCACTGTGCAGTGGGAAG-----        | morL 21 2       |
| -----CAGCCACTGTGCAGTGGG-----           | morL 18 1       |
| -----ACTGTGCAGTGGGAAGGG-----           | morL 18 1       |
| -----CACTGTGCAGTGGGAAGGGG-----         | morL 20 1       |
| -----GCCACTGTGCAGTGGGA-----            | morL 18 1       |
| ---CGGCAGCCACTGTGCAGTGGGA-----         | morL 23 1       |
| -----CTGTGCAGTGGGAAGGGG-----           | morL 18 1       |
| -----CAGCCACTGTGCAGTGGGA-----          | morL 19 1       |
| -----AGCCACTGTGCAGTGGGA-----           | morL 18 1       |
| -----CAGCCACTGTGCAGTGGGA-----          | morL 20 1       |
| -----AGCCACTGTGCAGTGGGAAGGG-----       | morL 22 1       |
| -----CAGCCACTGTGCAGTGGGAAGG-----       | morL 22 1       |
| -----GGGGCCGATGCACTGTAAGAGA-----       | mirL 23 365     |
| -----GGGGCCGATGCACTGTAAGA-----         | mirL 21 329     |
| -----GGGGCCGATGCACTGTAAGAG-----        | mirL 22 224     |
| -----GGGGCCGATGCACTGTAAG-----          | mirL 20 84      |
| -----GGGGCCGATGCACTGTAA-----           | mirL 19 77      |
| -----GGGGCCGATGCACTGTAAGAGAG-----      | mirL 24 74      |
| -----GGGGCCGATGCACTGTAAGA-----         | mirL 22 57      |
| -----GGGGCCGATGCACTGTAA-----           | mirL 20 37      |
| -----GGGGCCGATGCACTGTAAG-----          | mirL 21 33      |
| -----GGGGCCGATGCACTGTAAGAGAGT-----     | mirL 25 23      |
| -----GGGGCCGATGCACTGTAAGAG-----        | mirL 23 23      |
| -----GGGGCCGATGCACTGTAAGAGA-----       | mirL 24 9       |
| -----GGGGCCGATGCACTGTAAGAGAG-----      | mirL 25 9       |
| -----GGGGCCGATGCACTGTA-----            | mirL 19 5       |
| -----AGGGGGCCGATGCACTGTAA-----         | mirL 21 4       |
| -----AGGGGGCCGATGCACTGTAAG-----        | mirL 22 4       |
| -----GGGCCGATGCACTGTAAGA-----          | mirL 20 2       |
| -----AGGGGGCCGATGCACTG-----            | mirL 18 2       |
| -----GGGCCGATGCACTGTAAG-----           | mirL 19 2       |
| -----GGGCCGATGCACTGTAAGAGAGTGAGTA----- | mirL 29 1       |
| -----AGGGGGCCGATGCACTGTAAGAG-----      | mirL 24 1       |
| -----GGGCCGATGCACTGTAAGAGAGT-----      | mirL 24 1       |
| -----GGGCCGATGCACTGTAAGAGA-----        | mirL 22 1       |
| -----GGCCGATGCACTGTAAG-----            | mirL 18 1       |
| -----AGTGAGTAGCAGGTCTCA-----           | loop 18 2       |
| -----GAGTGAGTAGCAGGTCTC-----           | loop 18 1       |
| -----TCACAGTGAACCGGTCTCTTT-----        | mirR 21 1136067 |
| -----TCACAGTGAACCGGTCTCTTTC-----       | mirR 22 211019  |
| -----TCACAGTGAACCGGTCTCTT-----         | mirR 20 88220   |
| -----TCACAGTGAACCGGTCTC-----           | mirR 18 71785   |
| -----TCACAGTGAACCGGTCTCTTTC-----       | mirR 23 60481   |
| -----TCACAGTGAACCGGTCTCT-----          | mirR 19 44701   |
| -----CACAGTGAACCGGTCTCTTT-----         | mirR 20 19534   |

```
-----TCACAGTGAACCGGTCTCTTTCCC----- mirR 24 9347
-----CACAGTGAACCGGTCTCTTTTC----- mirR 21 3552
-----CACAGTGAACCGGTCTCTTTCC----- mirR 22 1526
-----CACAGTGAACCGGTCTCTTT----- mirR 19 1337
-----CTCACAGTGAACCGGTCTCTTT----- mirR 22 1283
-----CTCACAGTGAACCGGTCTCTTTTC----- mirR 23 766
-----CACAGTGAACCGGTCTCT----- mirR 18 556
-----ACAGTGAACCGGTCTCTTT----- mirR 19 458
-----CAGTGAACCGGTCTCTTT----- mirR 18 237
-----CACAGTGAACCGGTCTCTTTCCC----- mirR 23 235
-----CTCACAGTGAACCGGTCTCTTT----- mirR 21 201
-----CTCACAGTGAACCGGTCTCT----- mirR 19 163
-----ACAGTGAACCGGTCTCTTTTC----- mirR 20 100
-----TCTCACAGTGAACCGGTCTCTTT----- mirR 23 100
-----CTCACAGTGAACCGGTCTCT----- mirR 20 75
-----ACAGTGAACCGGTCTCTTT----- mirR 18 54
-----CTCACAGTGAACCGGTCTCTTTCC----- mirR 24 54
-----CTCACAGTGAACCGGTCT----- mirR 18 45
-----CAGTGAACCGGTCTCTTTTC----- mirR 19 43
-----ACAGTGAACCGGTCTCTTTCC----- mirR 21 37
-----TCTCACAGTGAACCGGTCTCTTTCC----- mirR 25 31
-----CAGTGAACCGGTCTCTTTCC----- mirR 20 20
-----TCTCACAGTGAACCGGTCTCT----- mirR 20 20
-----TCTCACAGTGAACCGGTCTCTTT----- mirR 22 14
-----CACAGTGAACCGGTCTCTTTCCCT----- mirR 24 13
-----TCTCACAGTGAACCGGTCT----- mirR 19 11
-----TCTCACAGTGAACCGGTCTCTTTTC----- mirR 24 7
-----TCTCACAGTGAACCGGTCTCT----- mirR 21 7
-----GTCTCACAGTGAACCGGT----- mirR 18 5
-----GTCTCACAGTGAACCGGTCTCTTT----- mirR 24 4
-----GTCTCACAGTGAACCGGTCT----- mirR 20 3
-----ACAGTGAACCGGTCTCTTTCCC----- mirR 22 3
-----CAGTGAACCGGTCTCTTTCCC----- mirR 21 2
-----GTCTCACAGTGAACCGGTCTCT----- mirR 22 1
-----GTCTCACAGTGAACCGGTC----- mirR 19 1
-----CAGTGAACCGGTCTCTTTCCCTAC----- mirR 24 1
-----GTCTCACAGTGAACCGGTCTCTTTTC----- mirR 25 1
-----TTCCCTACTGTGTCAAAC----- morR 18 2
-----TTTCCCTACTGTGTCAAAC----- morR 19 1
-----CTACTGTGTCAAACCTCCTA morR 19 1
-----CCCTACTGTGTCAAACCTCC-- morR 19 1
-----CCTACTGTGTCAAACCTCC-- morR 18 1
-----CCCTACTGTGTCAAACCTCCTA morR 21 1
-----TACTGTGTCAAACCTCCTA morR 18 1
```

>mmu-mir-125a

| Sequence                                                                                                     | species | len | reads  |
|--------------------------------------------------------------------------------------------------------------|---------|-----|--------|
| TAGCTACACTGCCGGCCTCTGGGTCCCTGAGACCCTTTAACCTGTGAGGACGTCCAGGGTCACAGGTGAGGTTCTTGGGAGCCTGGCGCCTGGCCCAGCCACAAATTT | morL    | 19  | 27     |
| ---TACACTGCCGGCCTCTGGG                                                                                       | morL    | 19  | 17     |
| ---ACACTGCCGGCCTCTGGGT                                                                                       | morL    | 18  | 13     |
| ---TACACTGCCGGCCTCTGGGT                                                                                      | morL    | 20  | 12     |
| ---CACTGCCGGCCTCTGGGT                                                                                        | morL    | 18  | 5      |
| ---CTACACTGCCGGCCTCTGGGT                                                                                     | morL    | 21  | 3      |
| ---CTACACTGCCGGCCTCTGGG                                                                                      | morL    | 20  | 2      |
| ---CACTGCCGGCCTCTGGGTC                                                                                       | morL    | 19  | 1      |
| ---ACACTGCCGGCCTCTGGGTC                                                                                      | morL    | 20  | 1      |
| ---ACTGCCGGCCTCTGGGTC                                                                                        | morL    | 18  | 1      |
| TAGCTACACTGCCGGCCTCTGGG                                                                                      | morL    | 23  | 1      |
| ---CACTGCCGGCCTCTGGGTCC                                                                                      | morL    | 20  | 1      |
| -----TCCCTGAGACCCTTTAACCTGT                                                                                  | mirL    | 22  | 851131 |
| -----TCCCTGAGACCCTTTAACCTGTGA                                                                                | mirL    | 24  | 264316 |
| -----TCCCTGAGACCCTTTAACCTGTG                                                                                 | mirL    | 23  | 169733 |
| -----TCCCTGAGACCCTTTAACCTGTGAG                                                                               | mirL    | 25  | 114192 |
| -----TCCCTGAGACCCTTTAACCT                                                                                    | mirL    | 19  | 106446 |
| -----TCCCTGAGACCCTTTAACCTG                                                                                   | mirL    | 21  | 52770  |
| -----TCCCTGAGACCCTTTAAC                                                                                      | mirL    | 18  | 52343  |
| -----CCCTGAGACCCTTTAACCTGT                                                                                   | mirL    | 21  | 15791  |
| -----CCCTGAGACCCTTTAACCTGTGA                                                                                 | mirL    | 23  | 8117   |
| -----CCCTGAGACCCTTTAACCTGTG                                                                                  | mirL    | 22  | 4516   |
| -----CCCTGAGACCCTTTAACCTG                                                                                    | mirL    | 20  | 944    |
| -----CCCTGAGACCCTTTAACCT                                                                                     | mirL    | 18  | 894    |
| -----CCCTGAGACCCTTTAACCT                                                                                     | mirL    | 19  | 827    |
| -----CCCTGAGACCCTTTAACCTGTGAG                                                                                | mirL    | 24  | 540    |
| -----CCTGAGACCCTTTAACCTGT                                                                                    | mirL    | 20  | 267    |
| -----GTCCTGAGACCCTTTAACCTGT                                                                                  | mirL    | 23  | 217    |
| -----CCTGAGACCCTTTAACCTGTGA                                                                                  | mirL    | 22  | 187    |
| -----CTGAGACCCTTTAACCTGT                                                                                     | mirL    | 19  | 182    |
| -----CTGAGACCCTTTAACCTGTGA                                                                                   | mirL    | 21  | 151    |
| -----CCTGAGACCCTTTAACCTGTG                                                                                   | mirL    | 21  | 98     |
| -----GTCCTGAGACCCTTTAACCTGTGA                                                                                | mirL    | 25  | 72     |
| -----CTGAGACCCTTTAACCTGTG                                                                                    | mirL    | 20  | 69     |
| -----GTCCTGAGACCCTTTAACCT                                                                                    | mirL    | 20  | 36     |
| -----CCTGAGACCCTTTAACCTG                                                                                     | mirL    | 19  | 33     |
| -----GTCCTGAGACCCTTTAACCTGTG                                                                                 | mirL    | 24  | 21     |
| -----CTGAGACCCTTTAACCTG                                                                                      | mirL    | 18  | 19     |
| -----GGTCCTGAGACCCTTTAACCTGT                                                                                 | mirL    | 24  | 17     |
| -----CCTGAGACCCTTTAACCT                                                                                      | mirL    | 18  | 17     |
| -----GTCCTGAGACCCTTTAACCTG                                                                                   | mirL    | 22  | 11     |
| -----CTGAGACCCTTTAACCTGTGAG                                                                                  | mirL    | 22  | 11     |
| -----CCTGAGACCCTTTAACCTGTGAG                                                                                 | mirL    | 23  | 10     |
| -----GGTCCTGAGACCCTTTAACCT                                                                                   | mirL    | 22  | 8      |
| -----GTCCTGAGACCCTTTAACCT                                                                                    | mirL    | 21  | 7      |

```

-----CCTGAGACCCTTTAACCTGTGAGG----- mirL 24 4
-----GGTCCCTGAGACCCTTTAACCTGTG----- mirL 25 3
-----GGGTCCCTGAGACCCTTTAACCTGT----- mirL 25 3
-----GGTCCCTGAGACCCTTTAACCTGTGA----- mirL 26 3
-----GTCCCTGAGACCCTTTAACCTGTGAG----- mirL 26 3
-----CTGAGACCCTTTAACCTGTGAGG----- mirL 23 2
-----GGGTCCCTGAGACCCTTTAAC----- mirL 22 1
-----GGGTCCCTGAGACCCTTTAACCTGTGA----- mirL 27 1
-----GGTCCCTGAGACCCTTTA----- mirL 18 1
-----GGGTCCCTGAGACCCTTTAACCTGTG----- mirL 26 1
-----GGTCCCTGAGACCCTTTAAC----- mirL 21 1
-----ACAGGTGAGGTTCTTGGGAGC----- mirR 21 1431
-----ACAGGTGAGGTTCTTGGGAG----- mirR 20 770
-----ACAGGTGAGGTTCTTGGGAGCC----- mirR 22 630
-----ACAGGTGAGGTTCTTGGGA----- mirR 19 184
-----ACAGGTGAGGTTCTTGGGAGCCT----- mirR 23 132
-----ACAGGTGAGGTTCTTGGG----- mirR 18 69
-----ACAGGTGAGGTTCTTGGGAGCCTG----- mirR 24 67
-----CAGGTGAGGTTCTTGGGAGC----- mirR 20 48
-----CAGGTGAGGTTCTTGGGAG----- mirR 19 31
-----CAGGTGAGGTTCTTGGGAGCC----- mirR 21 20
-----CAGGTGAGGTTCTTGGGAGCCT----- mirR 22 6
-----GGTGAGGTTCTTGGGAGC----- mirR 18 6
-----CAGGTGAGGTTCTTGGGA----- mirR 18 5
-----GGTGAGGTTCTTGGGAGCCT----- mirR 20 3
-----CAGGTGAGGTTCTTGGGAGCCTG----- mirR 23 3
-----AGGTGAGGTTCTTGGGAGC----- mirR 19 3
-----AGGTGAGGTTCTTGGGAGCC----- mirR 20 1
-----AGGTGAGGTTCTTGGGAG----- mirR 18 1
-----CAGGTGAGGTTCTTGGGAGCCTGGC----- mirR 25 1
-----CACAGGTGAGGTTCTTGGGAG----- mirR 21 1
-----TCACAGGTGAGGTTCTTG----- mirR 18 1
-----AGGTGAGGTTCTTGGGAGCCT----- mirR 21 1
-----CACAGGTGAGGTTCTTGGGA----- mirR 20 1
-----GCCTGGCGCCTGGCCCAG----- morR 18 1
-----TGGCGCCTGGCCCAGCCACAAATT morR 25 1
-----AGCCTGGCGCCTGGCCA----- morR 18 1

>mmu-mir-24-2
CCTCTCTCCGGGCTCCGCCTCCCGTGCCTACTGAGCTGAAACAGTTGATTCCAGTGCACTGGCTCAGTTCAGCAGGAACAGGAGTCCAGCCCCCTAGGAGCTGGC species len reads
---CTCTCCGGGCTCCGCCTCCC----- morL 20 6
---CTCCGGGCTCCGCCTCCCG----- morL 19 3
---CTCTCCGGGCTCCGCCTCC----- morL 19 2
---TCTCTCCGGGCTCCGCCTCCC----- morL 21 1
CCTCTCTCCGGGCTCCGCCTCCC----- morL 23 1
-----CCGGGCTCCGCCTCCCGT----- morL 18 1

```

```

--TCTCTCCGGGCTCCGCCT----- morL 18 1
-----TCCGGGCTCCGCCTCCG----- morL 18 1
---CTCTCCGGGCTCCGCCTCCG----- morL 21 1
----TCTCCGGGCTCCGCCTCCC----- morL 19 1
-----GTGCCTACTGAGCTGAAACAG----- mirL 21 6036
-----GTGCCTACTGAGCTGAAACAGTT----- mirL 22 2951
-----TGCCTACTGAGCTGAAACAGT----- mirL 21 773
-----GTGCCTACTGAGCTGAAAC----- mirL 19 693
-----GTGCCTACTGAGCTGAAACAGTT----- mirL 23 516
-----GTGCCTACTGAGCTGAAACA----- mirL 20 491
-----TGCCTACTGAGCTGAAACAGTT----- mirL 22 336
-----GTGCCTACTGAGCTGAAA----- mirL 18 192
-----TGCCTACTGAGCTGAAACA----- mirL 19 133
-----GTGCCTACTGAGCTGAAACAGTTG----- mirL 24 108
-----TGCCTACTGAGCTGAAACAG----- mirL 20 62
-----TGCCTACTGAGCTGAAA----- mirL 18 53
-----CGTGCCTACTGAGCTGAAACAG----- mirL 22 44
-----TGCCTACTGAGCTGAAACAGTTG----- mirL 23 37
-----GCCTACTGAGCTGAAACAGT----- mirL 20 20
-----GCCTACTGAGCTGAAACAG----- mirL 19 14
-----CCTACTGAGCTGAAACAGT----- mirL 19 12
-----GCCTACTGAGCTGAAACAGTT----- mirL 21 10
-----GCCTACTGAGCTGAAACA----- mirL 18 9
-----CCTACTGAGCTGAAACAGTT----- mirL 20 7
-----CGTGCCTACTGAGCTGAAAC----- mirL 20 6
-----CCTACTGAGCTGAAACAG----- mirL 18 5
-----CGTGCCTACTGAGCTGAAA----- mirL 19 5
-----CGTGCCTACTGAGCTGAAACAGT----- mirL 23 4
-----CGTGCCTACTGAGCTGAAACA----- mirL 21 4
-----GCCTACTGAGCTGAAACAGTTG----- mirL 22 2
-----CCTACTGAGCTGAAACAGTTG----- mirL 21 1
-----CCGTGCCTACTGAGCTGAAACA----- mirL 22 1
-----CAGTTGATTCCAGTGCAC----- loop 19 1
-----GTTGATTCCAGTGCAC----- loop 19 1
-----TGGCTCAGTTCAGCAGGAACAG----- mirR 22 982929
-----TGGCTCAGTTCAGCAGGAACAGG----- mirR 23 226710
-----TGGCTCAGTTCAGCAGGAACA----- mirR 21 144305
-----TGGCTCAGTTCAGCAGGAAC----- mirR 20 136286
-----TGGCTCAGTTCAGCAGGAACAGGA----- mirR 24 36120
-----TGGCTCAGTTCAGCAGGAA----- mirR 19 25952
-----GGCTCAGTTCAGCAGGAACAG----- mirR 21 21356
-----GGCTCAGTTCAGCAGGAACAGG----- mirR 22 13842
-----TGGCTCAGTTCAGCAGGA----- mirR 18 10428
-----GGCTCAGTTCAGCAGGAAC----- mirR 19 5361
-----GGCTCAGTTCAGCAGGAACA----- mirR 20 3514
-----GGCTCAGTTCAGCAGGAACAGGA----- mirR 23 2797

```

```

-----GCTCAGTTCAGCAGGAACAG----- mirR 20 1842
-----GCTCAGTTCAGCAGGAACAGGA----- mirR 22 1256
-----GCTCAGTTCAGCAGGAACAGG----- mirR 21 1084
-----GGCTCAGTTCAGCAGGAACAGGAG----- mirR 24 804
-----GCTCAGTTCAGCAGGAACAGGAG----- mirR 23 592
-----GGCTCAGTTCAGCAGGAA----- mirR 18 461
-----GCTCAGTTCAGCAGGAAC----- mirR 18 446
-----GCTCAGTTCAGCAGGAACA----- mirR 19 355
-----CTCAGTTCAGCAGGAACAG----- mirR 19 259
-----CTGGCTCAGTTCAGCAGGAACA----- mirR 22 178
-----CTGGCTCAGTTCAGCAGGAACAG----- mirR 23 171
-----GCTCAGTTCAGCAGGAACAGGAGT----- mirR 24 139
-----CTGGCTCAGTTCAGCAGGAAC----- mirR 21 63
-----CTGGCTCAGTTCAGCAGGAACAGG----- mirR 24 37
-----CTCAGTTCAGCAGGAACAGG----- mirR 20 28
-----CTCAGTTCAGCAGGAACA----- mirR 18 22
-----ACTGGCTCAGTTCAGCAGGAAC----- mirR 22 21
-----CTGGCTCAGTTCAGCAGGA----- mirR 19 15
-----ACTGGCTCAGTTCAGCAGGAACAG----- mirR 24 14
-----CTGGCTCAGTTCAGCAGGAA----- mirR 20 13
-----CTCAGTTCAGCAGGAACAGGA----- mirR 21 13
-----CACTGGCTCAGTTCAGCAGGAACAG----- mirR 25 6
-----CTGGCTCAGTTCAGCAGGAACAGGA----- mirR 25 5
-----CACTGGCTCAGTTCAGCAGGA----- mirR 21 2
-----ACTGGCTCAGTTCAGCAGGAA----- mirR 21 2
-----ACTGGCTCAGTTCAGCAGGA----- mirR 20 2
-----CACTGGCTCAGTTCAGCAGGAAC----- mirR 23 1
-----CTCAGTTCAGCAGGAACAGGAG----- mirR 22 1
-----CACTGGCTCAGTTCAGCA----- mirR 18 1
-----GAGTCCAGCCCCCTAGGAGCTGGC morR 24 1
-----CAGGAGTCCAGCCCCCTAG----- morR 19 1

```

>mmu-mir-128-1

```

CTTCTTCCTGAGCTGTTGGATTGGGGCCGTAGCACTGTCTGAGAGTTTACATTTCTCACAGTGAACCGGTCTCTTTTTCAGCTGC species len reads
---CTTCCTGAGCTGTTGGATT----- morL 19 6
---CTTCCTGAGCTGTTGGATTC----- morL 20 2
---CCTGAGCTGTTGGATTTCG----- morL 18 1
--TCTTCCTGAGCTGTTGGATTC----- morL 21 1
CTTCTTCCTGAGCTGTTGGATT----- morL 22 1
---TCCTGAGCTGTTGGATTCG----- morL 19 1
--TCTTCCTGAGCTGTTGGATTTCG----- morL 22 1
--TCTTCCTGAGCTGTTGGATT----- morL 20 1
--TTCTTCCTGAGCTGTTGGATT----- morL 21 1
---TTCTGAGCTGTTGGATTC----- morL 19 1
-----CGGGCCGTAGCACTGTCTGA----- mirL 21 692
-----CGGGCCGTAGCACTGTCTGAG----- mirL 22 133

```



```

-----CGGGGCCGTAGCACTGTCT----- mirL 19 95
-----CGGGGCCGTAGCACTGTCTGAGA----- mirL 23 88
-----CGGGGCCGTAGCACTGTCTG----- mirL 20 47
-----CGGGGCCGTAGCACTGTCT----- mirL 18 41
-----CGGGGCCGTAGCACTGTCTGAGAG----- mirL 24 10
-----TCGGGGCCGTAGCACTGTCTGAGAG----- mirL 25 1
-----TCGGGGCCGTAGCACTGTCTGAG----- mirL 23 1
-----TCGGGGCCGTAGCACTGT----- mirL 18 1
-----TCACAGTGAACCGGTCTCTTT----- mirR 21 1136106
-----TCACAGTGAACCGGTCTCTTT----- mirR 22 189106
-----TCACAGTGAACCGGTCTCTT----- mirR 20 88220
-----TCACAGTGAACCGGTCTC----- mirR 18 71785
-----TCACAGTGAACCGGTCTCT----- mirR 19 44943
-----TCACAGTGAACCGGTCTCTTTT----- mirR 23 39165
-----TCACAGTGAACCGGTCTCTTTTTC----- mirR 24 19914
-----CACAGTGAACCGGTCTCTTT----- mirR 20 19534
-----CACAGTGAACCGGTCTCTTTT----- mirR 21 4158
-----CTCACAGTGAACCGGTCTCTTT----- mirR 22 1354
-----CACAGTGAACCGGTCTCTT----- mirR 19 1343
-----CACAGTGAACCGGTCTCTTTT----- mirR 22 1233
-----CACAGTGAACCGGTCTCT----- mirR 18 556
-----ACAGTGAACCGGTCTCTTT----- mirR 19 458
-----CACAGTGAACCGGTCTCTTTTTC----- mirR 23 323
-----CTCACAGTGAACCGGTCTCTTTT----- mirR 23 260
-----CAGTGAACCGGTCTCTTT----- mirR 18 237
-----CTCACAGTGAACCGGTCTCTT----- mirR 21 201
-----CTCACAGTGAACCGGTCTC----- mirR 19 166
-----ACAGTGAACCGGTCTCTTTT----- mirR 20 150
-----TCTCACAGTGAACCGGTCTCTTT----- mirR 23 100
-----CTCACAGTGAACCGGTCTCT----- mirR 20 75
-----CAGTGAACCGGTCTCTTTT----- mirR 19 60
-----ACAGTGAACCGGTCTCTT----- mirR 18 54
-----CTCACAGTGAACCGGTCT----- mirR 18 45
-----CTCACAGTGAACCGGTCTCTTTT----- mirR 24 38
-----ACAGTGAACCGGTCTCTTTT----- mirR 21 37
-----TCTCACAGTGAACCGGTCTCTTTT----- mirR 24 27
-----CACAGTGAACCGGTCTCTTTTTC----- mirR 24 22
-----TCTCACAGTGAACCGGTCTC----- mirR 20 20
-----TCTCACAGTGAACCGGTCTCTT----- mirR 22 14
-----TCTCACAGTGAACCGGTCT----- mirR 19 11
-----ACAGTGAACCGGTCTCTTTTTC----- mirR 22 8
-----TCTCACAGTGAACCGGTCTCT----- mirR 21 7
-----CAGTGAACCGGTCTCTTTT----- mirR 20 7
-----TCTCACAGTGAACCGGTCTCTTTT----- mirR 25 6
-----CAGTGAACCGGTCTCTTTTTC----- mirR 22 2
-----TTCTCACAGTGAACCGGTCTCTTT----- mirR 24 2

```

```
-----ACAGTGAACCGGTCTCTTTTTCAGCTGC mirR 28 1
-----ACAGTGAACCGGTCTCTTTTTCAG---- mirR 24 1
-----CAGTGAACCGGTCTCTTTTTCAGC--- mirR 24 1
```

>mmu-mir-24-1

| CCAGCTGTGATTGGACCCGCCCTCCGGTGCCTACTGAGCTGATATCAGTTCTCATTTACACACTGGCTCAGTTCAGCAGGAACAGGAGTCGAGCCCTTGAGCAAAAAGCCTACCCATC | species | len | reads |
|------------------------------------------------------------------------------------------------------------------------|---------|-----|-------|
| -----TGTGATTGGACCCGCCCTCCG-----                                                                                        | morL    | 21  | 14    |
| ----CTGTGATTGGACCCGCCCTCC-----                                                                                         | morL    | 21  | 10    |
| ----GTGATTGGACCCGCCCTCCG-----                                                                                          | morL    | 20  | 10    |
| -----TGTGATTGGACCCGCCCTCCGG-----                                                                                       | morL    | 22  | 8     |
| ----CTGTGATTGGACCCGCCCTCCGG-----                                                                                       | morL    | 23  | 8     |
| ----CTGTGATTGGACCCGCCCTCCG-----                                                                                        | morL    | 22  | 7     |
| ----TGTGATTGGACCCGCCCTC-----                                                                                           | morL    | 19  | 4     |
| ----GTGATTGGACCCGCCCTC-----                                                                                            | morL    | 18  | 3     |
| ----GTGATTGGACCCGCCCTCCGG-----                                                                                         | morL    | 21  | 3     |
| ----CTGTGATTGGACCCGCCCTC-----                                                                                          | morL    | 20  | 3     |
| ----GTGATTGGACCCGCCCTC-----                                                                                            | morL    | 19  | 2     |
| ---GCTGTGATTGGACCCGCCCTC-----                                                                                          | morL    | 21  | 2     |
| ---GCTGTGATTGGACCCGCCCTCCG-----                                                                                        | morL    | 23  | 2     |
| ----CTGTGATTGGACCCGCCCT-----                                                                                           | morL    | 19  | 1     |
| -----TTGGACCCGCCCTCCGGT-----                                                                                           | morL    | 18  | 1     |
| ----TGTGATTGGACCCGCCCTCC-----                                                                                          | morL    | 20  | 1     |
| CCAGCTGTGATTGGACCCGCCCTCCG-----                                                                                        | morL    | 26  | 1     |
| ---GCTGTGATTGGACCCGCCCT-----                                                                                           | morL    | 20  | 1     |
| ----TGATTGGACCCGCCCTCCG-----                                                                                           | morL    | 19  | 1     |
| -----ATTGGACCCGCCCTCCGG-----                                                                                           | morL    | 18  | 1     |
| -----GTGCCTACTGAGCTGATATC-----                                                                                         | mirL    | 20  | 399   |
| -----GTGCCTACTGAGCTGATATCAG-----                                                                                       | mirL    | 22  | 287   |
| -----GGTGCCTACTGAGCTGATATCA-----                                                                                       | mirL    | 22  | 226   |
| -----GTGCCTACTGAGCTGATAT-----                                                                                          | mirL    | 19  | 191   |
| -----GTGCCTACTGAGCTGATATCA-----                                                                                        | mirL    | 21  | 188   |
| -----GTGCCTACTGAGCTGATA-----                                                                                           | mirL    | 18  | 148   |
| -----GTGCCTACTGAGCTGATATCAGT-----                                                                                      | mirL    | 23  | 130   |
| -----TGCCTACTGAGCTGATATCA-----                                                                                         | mirL    | 20  | 115   |
| -----GGTGCCTACTGAGCTGATAT-----                                                                                         | mirL    | 20  | 100   |
| -----GGTGCCTACTGAGCTGATATC-----                                                                                        | mirL    | 21  | 87    |
| -----TGCCTACTGAGCTGATATCAG-----                                                                                        | mirL    | 21  | 53    |
| -----GGTGCCTACTGAGCTGATATCAG-----                                                                                      | mirL    | 23  | 38    |
| -----TGCCTACTGAGCTGATATC-----                                                                                          | mirL    | 19  | 30    |
| -----GTGCCTACTGAGCTGATATCAGTT-----                                                                                     | mirL    | 24  | 28    |
| -----GGTGCCTACTGAGCTGATA-----                                                                                          | mirL    | 19  | 23    |
| -----TGCCTACTGAGCTGATATCAGT-----                                                                                       | mirL    | 22  | 20    |
| -----TGCCTACTGAGCTGATAT-----                                                                                           | mirL    | 18  | 19    |
| -----GGTGCCTACTGAGCTGATATCAGT-----                                                                                     | mirL    | 24  | 18    |
| -----GGTGCCTACTGAGCTGAT-----                                                                                           | mirL    | 18  | 11    |
| -----TGCCTACTGAGCTGATATCAGTT-----                                                                                      | mirL    | 23  | 7     |

```

-----GCCTACTGAGCTGATATC----- mirL 18 4
-----CCTACTGAGCTGATATCA----- mirL 18 4
-----TGCCCTACTGAGCTGATATCAGTTC----- mirL 24 3
-----CCTACTGAGCTGATATCAGT----- mirL 20 3
-----GCCTACTGAGCTGATATCAGTT----- mirL 22 2
-----GCCTACTGAGCTGATATCAG----- mirL 20 2
-----CCTACTGAGCTGATATCAGTT----- mirL 21 2
-----CGGTGCCTACTGAGCTGATATCA----- mirL 23 1
-----GCCTACTGAGCTGATATCAGT----- mirL 21 1
-----GTTCTCATTTACACACTGG----- loop 20 1
-----TGGCTCAGTTCAGCAGGAACAG----- mirR 22 982929
-----TGGCTCAGTTCAGCAGGAACAGG----- mirR 23 226710
-----TGGCTCAGTTCAGCAGGAACA----- mirR 21 144305
-----TGGCTCAGTTCAGCAGGAAC----- mirR 20 136286
-----TGGCTCAGTTCAGCAGGAACAGGA----- mirR 24 36120
-----TGGCTCAGTTCAGCAGGAA----- mirR 19 25952
-----GGCTCAGTTCAGCAGGAACAG----- mirR 21 21356
-----GGCTCAGTTCAGCAGGAACAGG----- mirR 22 13842
-----TGGCTCAGTTCAGCAGGA----- mirR 18 10428
-----GGCTCAGTTCAGCAGGAAC----- mirR 19 5361
-----GGCTCAGTTCAGCAGGAACA----- mirR 20 3514
-----GGCTCAGTTCAGCAGGAACAGGA----- mirR 23 2797
-----GCTCAGTTCAGCAGGAACAG----- mirR 20 1842
-----GCTCAGTTCAGCAGGAACAGGA----- mirR 22 1256
-----GCTCAGTTCAGCAGGAACAGG----- mirR 21 1084
-----GGCTCAGTTCAGCAGGAACAGGAG----- mirR 24 804
-----GCTCAGTTCAGCAGGAACAGGAG----- mirR 23 592
-----GGCTCAGTTCAGCAGGAA----- mirR 18 461
-----GCTCAGTTCAGCAGGAAC----- mirR 18 446
-----GCTCAGTTCAGCAGGAACA----- mirR 19 355
-----CTCAGTTCAGCAGGAACAG----- mirR 19 259
-----CTGGCTCAGTTCAGCAGGAACA----- mirR 22 178
-----CTGGCTCAGTTCAGCAGGAACAG----- mirR 23 171
-----GCTCAGTTCAGCAGGAACAGGAGT----- mirR 24 139
-----CTGGCTCAGTTCAGCAGGAAC----- mirR 21 63
-----CTGGCTCAGTTCAGCAGGAACAGG----- mirR 24 37
-----CTCAGTTCAGCAGGAACAGG----- mirR 20 28
-----CTCAGTTCAGCAGGAACA----- mirR 18 22
-----ACTGGCTCAGTTCAGCAGGAAC----- mirR 22 21
-----CTGGCTCAGTTCAGCAGGA----- mirR 19 15
-----ACTGGCTCAGTTCAGCAGGAACAG----- mirR 24 14
-----CTGGCTCAGTTCAGCAGGAA----- mirR 20 13
-----CTCAGTTCAGCAGGAACAGGA----- mirR 21 13
-----CACTGGCTCAGTTCAGCAGGAACAG----- mirR 25 6
-----CTGGCTCAGTTCAGCAGGAACAGGA----- mirR 25 5
-----CACTGGCTCAGTTCAGCAGGA----- mirR 21 2

```

```

-----ACTGGCTCAGTTCAGCAGGAA----- mirR 21 2
-----ACTGGCTCAGTTCAGCAGGA----- mirR 20 2
-----CACTGGCTCAGTTCAGCA----- mirR 18 1
-----CACTGGCTCAGTTCAGCAGGAAC----- mirR 23 1
-----CTCAGTTCAGCAGGAACAGGAG----- mirR 22 1
-----GGAGTCGAGCCCTTGAGCAA----- morR 20 51
-----GGAGTCGAGCCCTTGAGCA----- morR 19 5
-----GTCGAGCCCTTGAGCAAA----- morR 18 2
-----GGAGTCGAGCCCTTGAGC----- morR 18 1
-----GAGTCGAGCCCTTGAGCAAA----- morR 20 1
-----TCGAGCCCTTGAGCAAAAA----- morR 19 1
-----GAGTCGAGCCCTTGAGCAAAAAGCCTACCCATC morR 33 1

```

>mmu-mir-29b-2

| AGATCCTCTTCTTCTGGAAGCTGGTTTCACATGGTGGCTTAGATTTTCCATCTTTGTATCTAGCACCATTTGAAATCAGTGTTTTAGGAGTAAGAATTGCAGCAC | species | len | reads |
|-----------------------------------------------------------------------------------------------------------|---------|-----|-------|
| AGATCCTCTTCTTCTGGAAGCTGGTTTCACATGGTGGCTTAGATTTTCCATCTTTGTATCTAGCACCATTTGAAATCAGTGTTTTAGGAGTAAGAATTGCAGCAC | morL    | 19  | 3     |
| -GATCCTCTTCTTCTGGAAGCTGGTTTCACATGGTGGCTTAGATTTTCCATCTTTGTATCTAGCACCATTTGAAATCAGTGTTTTAGGAGTAAGAATTGCAGCAC | morL    | 18  | 1     |
| ---TCCTCTTCTTCTGGAAGCTGGTTTCACATGGTGGCTTAGATTTTCCATCTTTGTATCTAGCACCATTTGAAATCAGTGTTTTAGGAGTAAGAATTGCAGCAC | morL    | 18  | 1     |
| -----CTGGTTTCACATGGTGGCTTAGATTTTCCATCTTTGTATCTAGCACCATTTGAAATCAGTGTTTTAGGAGTAAGAATTGCAGCAC                | mirL    | 22  | 11332 |
| -----CTGGTTTCACATGGTGGCTTAGATTTTCCATCTTTGTATCTAGCACCATTTGAAATCAGTGTTTTAGGAGTAAGAATTGCAGCAC                | mirL    | 23  | 4311  |
| -----CTGGTTTCACATGGTGGCTTAGATTTTCCATCTTTGTATCTAGCACCATTTGAAATCAGTGTTTTAGGAGTAAGAATTGCAGCAC                | mirL    | 24  | 2388  |
| -----GCTGGTTTCACATGGTGGCTTAGATTTTCCATCTTTGTATCTAGCACCATTTGAAATCAGTGTTTTAGGAGTAAGAATTGCAGCAC               | mirL    | 23  | 1574  |
| -----CTGGTTTCACATGGTGGCTTAGATTTTCCATCTTTGTATCTAGCACCATTTGAAATCAGTGTTTTAGGAGTAAGAATTGCAGCAC                | mirL    | 18  | 1392  |
| -----CTGGTTTCACATGGTGGCTTAGATTTTCCATCTTTGTATCTAGCACCATTTGAAATCAGTGTTTTAGGAGTAAGAATTGCAGCAC                | mirL    | 21  | 1208  |
| -----GCTGGTTTCACATGGTGGCTTAGATTTTCCATCTTTGTATCTAGCACCATTTGAAATCAGTGTTTTAGGAGTAAGAATTGCAGCAC               | mirL    | 22  | 995   |
| -----TGGTTTCACATGGTGGCTTAGATTTTCCATCTTTGTATCTAGCACCATTTGAAATCAGTGTTTTAGGAGTAAGAATTGCAGCAC                 | mirL    | 21  | 581   |
| -----CTGGTTTCACATGGTGGCTTAGATTTTCCATCTTTGTATCTAGCACCATTTGAAATCAGTGTTTTAGGAGTAAGAATTGCAGCAC                | mirL    | 25  | 558   |
| -----TGGTTTCACATGGTGGCTTAGATTTTCCATCTTTGTATCTAGCACCATTTGAAATCAGTGTTTTAGGAGTAAGAATTGCAGCAC                 | mirL    | 22  | 520   |
| -----GCTGGTTTCACATGGTGGCTTAGATTTTCCATCTTTGTATCTAGCACCATTTGAAATCAGTGTTTTAGGAGTAAGAATTGCAGCAC               | mirL    | 24  | 495   |
| -----TGGTTTCACATGGTGGCTTAGATTTTCCATCTTTGTATCTAGCACCATTTGAAATCAGTGTTTTAGGAGTAAGAATTGCAGCAC                 | mirL    | 23  | 487   |
| -----GCTGGTTTCACATGGTGGCTTAGATTTTCCATCTTTGTATCTAGCACCATTTGAAATCAGTGTTTTAGGAGTAAGAATTGCAGCAC               | mirL    | 19  | 486   |
| -----CTGGTTTCACATGGTGGCTTAGATTTTCCATCTTTGTATCTAGCACCATTTGAAATCAGTGTTTTAGGAGTAAGAATTGCAGCAC                | mirL    | 20  | 370   |
| -----GCTGGTTTCACATGGTGGCTTAGATTTTCCATCTTTGTATCTAGCACCATTTGAAATCAGTGTTTTAGGAGTAAGAATTGCAGCAC               | mirL    | 25  | 267   |
| -----GTTTCACATGGTGGCTTAGATTTTCCATCTTTGTATCTAGCACCATTTGAAATCAGTGTTTTAGGAGTAAGAATTGCAGCAC                   | mirL    | 19  | 133   |
| -----GGTTTCACATGGTGGCTTAGATTTTCCATCTTTGTATCTAGCACCATTTGAAATCAGTGTTTTAGGAGTAAGAATTGCAGCAC                  | mirL    | 20  | 120   |
| -----GCTGGTTTCACATGGTGGCTTAGATTTTCCATCTTTGTATCTAGCACCATTTGAAATCAGTGTTTTAGGAGTAAGAATTGCAGCAC               | mirL    | 21  | 120   |
| -----GCTGGTTTCACATGGTGGCTTAGATTTTCCATCTTTGTATCTAGCACCATTTGAAATCAGTGTTTTAGGAGTAAGAATTGCAGCAC               | mirL    | 20  | 84    |
| -----TGGTTTCACATGGTGGCTTAGATTTTCCATCTTTGTATCTAGCACCATTTGAAATCAGTGTTTTAGGAGTAAGAATTGCAGCAC                 | mirL    | 20  | 56    |
| -----TGGTTTCACATGGTGGCTTAGATTTTCCATCTTTGTATCTAGCACCATTTGAAATCAGTGTTTTAGGAGTAAGAATTGCAGCAC                 | mirL    | 24  | 47    |
| -----TGGTTTCACATGGTGGCTTAGATTTTCCATCTTTGTATCTAGCACCATTTGAAATCAGTGTTTTAGGAGTAAGAATTGCAGCAC                 | mirL    | 18  | 26    |
| -----GGTTTCACATGGTGGCTTAGATTTTCCATCTTTGTATCTAGCACCATTTGAAATCAGTGTTTTAGGAGTAAGAATTGCAGCAC                  | mirL    | 19  | 20    |
| -----GTTTCACATGGTGGCTTAGATTTTCCATCTTTGTATCTAGCACCATTTGAAATCAGTGTTTTAGGAGTAAGAATTGCAGCAC                   | mirL    | 18  | 18    |
| -----TGGTTTCACATGGTGGCTTAGATTTTCCATCTTTGTATCTAGCACCATTTGAAATCAGTGTTTTAGGAGTAAGAATTGCAGCAC                 | mirL    | 19  | 16    |
| -----GGTTTCACATGGTGGCTTAGATTTTCCATCTTTGTATCTAGCACCATTTGAAATCAGTGTTTTAGGAGTAAGAATTGCAGCAC                  | mirL    | 21  | 15    |
| -----GTTTCACATGGTGGCTTAGATTTTCCATCTTTGTATCTAGCACCATTTGAAATCAGTGTTTTAGGAGTAAGAATTGCAGCAC                   | mirL    | 20  | 10    |
| -----GGTTTCACATGGTGGCTTAGATTTTCCATCTTTGTATCTAGCACCATTTGAAATCAGTGTTTTAGGAGTAAGAATTGCAGCAC                  | mirL    | 22  | 10    |

```

-----GGTTTCACATGGTGGCTT----- mirL 18 6
-----AGCTGGTTTCACATGGTGGCTTAG----- mirL 24 4
-----GTTTCACATGGTGGCTTAGAT----- mirL 21 3
-----AGCTGGTTTCACATGGTGGCTTA----- mirL 23 3
-----GGTTTCACATGGTGGCTTAGATT----- mirL 23 2
-----AGCTGGTTTCACATGGTGGCTTAGA----- mirL 25 2
-----AGCTGGTTTCACATGGTGG----- mirL 19 1
-----GATTTTTCCATCTTTGTA----- loop 18 1
-----TAGCACCATTTGAAATCAGTGT----- mirR 22 785471
-----TAGCACCATTTGAAATCAGTGT----- mirR 23 295690
-----TAGCACCATTTGAAATCAGTG----- mirR 21 127808
-----TAGCACCATTTGAAATCAGTGT----- mirR 24 98608
-----TAGCACCATTTGAAATCAGT----- mirR 20 76772
-----TAGCACCATTTGAAATCAG----- mirR 19 59950
-----TAGCACCATTTGAAATCAGTGT----- mirR 25 49116
-----CTAGCACCATTTGAAATCAGTGT----- mirR 23 34810
-----AGCACCATTTGAAATCAGTGT----- mirR 21 28606
-----AGCACCATTTGAAATCAGTGT----- mirR 22 8905
-----CTAGCACCATTTGAAATCAGTG----- mirR 22 4288
-----AGCACCATTTGAAATCAGTGT----- mirR 23 3142
-----CTAGCACCATTTGAAATCAGT----- mirR 21 3117
-----AGCACCATTTGAAATCAGTG----- mirR 20 3071
-----CTAGCACCATTTGAAATCAGTGT----- mirR 24 2611
-----CTAGCACCATTTGAAATCAG----- mirR 20 1546
-----AGCACCATTTGAAATCAGT----- mirR 19 1423
-----AGCACCATTTGAAATCAGTGT----- mirR 24 1225
-----AGCACCATTTGAAATCAG----- mirR 18 703
-----GCACCATTTGAAATCAGTGT----- mirR 20 699
-----CTAGCACCATTTGAAATCA----- mirR 19 682
-----GCACCATTTGAAATCAGTGT----- mirR 21 308
-----GCACCATTTGAAATCAGTGT----- mirR 22 116
-----CTAGCACCATTTGAAATCAGTGT----- mirR 25 96
-----TCTAGCACCATTTGAAATCAGTGT----- mirR 24 84
-----CACCATTTGAAATCAGTGT----- mirR 19 81
-----GCACCATTTGAAATCAGT----- mirR 18 80
-----GCACCATTTGAAATCAGTG----- mirR 19 75
-----GCACCATTTGAAATCAGTGT----- mirR 23 30
-----TCTAGCACCATTTGAAATCAGTGT----- mirR 25 28
-----CACCATTTGAAATCAGTGT----- mirR 20 16
-----TCTAGCACCATTTGAAATCAGT----- mirR 22 14
-----TCTAGCACCATTTGAAATCA----- mirR 20 9
-----CACCATTTGAAATCAGTG----- mirR 18 8
-----CACCATTTGAAATCAGTGT----- mirR 21 6
-----ATCTAGCACCATTTGAAATCAGT----- mirR 23 6
-----TCTAGCACCATTTGAAATCAGTG----- mirR 23 5
-----ATCTAGCACCATTTGAAATCAGTGT----- mirR 25 5

```

```

-----GCACCATTTGAAATCAGTGTTTA----- mirR 24 4
-----TCTAGCACCATTTGAAATCAG----- mirR 21 3
-----TCTAGCACCATTTGAAATCAGTGTTT----- mirR 26 3
-----CACCATTTGAAATCAGTGTTT----- mirR 22 2
-----TTAGGAGTAAGAATTGCAGCAC morR 22 1
-----AGGAGTAAGAATTGCAGC-- morR 18 1
-----TTAGGAGTAAGAATTGCAGCA- morR 21 1

```

>mmu-mir-9-1

| Species | len | reads  |
|---------|-----|--------|
| morL    | 20  | 4      |
| morL    | 21  | 2      |
| morL    | 27  | 1      |
| morL    | 23  | 1      |
| morL    | 21  | 1      |
| morL    | 22  | 1      |
| mirL    | 21  | 415640 |
| mirL    | 23  | 352237 |
| mirL    | 22  | 214745 |
| mirL    | 20  | 53768  |
| mirL    | 19  | 41211  |
| mirL    | 22  | 29635  |
| mirL    | 20  | 23755  |
| mirL    | 18  | 17793  |
| mirL    | 21  | 14157  |
| mirL    | 24  | 7188   |
| mirL    | 19  | 5165   |
| mirL    | 18  | 2638   |
| mirL    | 21  | 1751   |
| mirL    | 23  | 978    |
| mirL    | 19  | 510    |
| mirL    | 20  | 377    |
| mirL    | 20  | 263    |
| mirL    | 22  | 188    |
| mirL    | 24  | 161    |
| mirL    | 18  | 101    |
| mirL    | 22  | 99     |
| mirL    | 23  | 86     |
| mirL    | 18  | 78     |
| mirL    | 19  | 72     |
| mirL    | 24  | 70     |
| mirL    | 23  | 37     |
| mirL    | 25  | 22     |
| mirL    | 20  | 15     |
| mirL    | 24  | 14     |
| mirL    | 19  | 13     |

```

-----TTGGTTATCTAGCTGTATGAG----- mirL 21 12
-----ATCTTTGGTTATCTAGCTGTA----- mirL 21 11
-----TTGGTTATCTAGCTGTATGAGT----- mirL 22 10
-----TATCTTTGGTTATCTAGCTGTATGA----- mirL 25 9
-----TTATCTTTGGTTATCTAGCTGTAT----- mirL 24 8
-----TATCTTTGGTTATCTAGCTGTAT----- mirL 23 5
-----TTATCTTTGGTTATCTAGCTGTATG----- mirL 25 5
-----TTATCTTTGGTTATCTAGCTGTATGA----- mirL 26 4
-----TATCTTTGGTTATCTAGCTG----- mirL 20 4
-----TTATCTTTGGTTATCTAGCTG----- mirL 21 4
-----TATCTTTGGTTATCTAGCTGT----- mirL 21 1
-----TATCTTTGGTTATCTAGCTGTATGAG----- mirL 26 1
-----TTGGTTATCTAGCTGTATGAGTGG----- mirL 24 1
-----TATCTTTGGTTATCTAGCTGTA----- mirL 22 1
-----AGTGGTGTGGAGTCTTCA----- loop 18 3
-----AGTGGTGTGGAGTCTTCATA----- loop 21 3
-----AGTGGTGTGGAGTCTTCATA----- loop 20 2
-----GAGTGGTGTGGAGTCTTCAT----- loop 20 1
-----TAAAGCTAGATAACCGAAAAGTAA----- mirR 23 111539
-----TAAAGCTAGATAACCGAAAAGTA----- mirR 22 58234
-----ATAAAGCTAGATAACCGAAAAGT----- mirR 22 33343
-----ATAAAGCTAGATAACCGAAAAGTA----- mirR 23 21246
-----ATAAAGCTAGATAACCGAAA----- mirR 20 12793
-----ATAAAGCTAGATAACCGAAAAGTAA----- mirR 24 10992
-----ATAAAGCTAGATAACCGAAAAG----- mirR 21 9238
-----ATAAAGCTAGATAACCGAA----- mirR 19 7487
-----TAAAGCTAGATAACCGAAAAGT----- mirR 21 7211
-----TAAAGCTAGATAACCGAAA----- mirR 19 7187
-----TAAAGCTAGATAACCGAAAAG----- mirR 20 6757
-----TAAAGCTAGATAACCGAAAAGTAAA----- mirR 24 5099
-----AAAGCTAGATAACCGAAAAGTAA----- mirR 22 4987
-----ATAAAGCTAGATAACCGA----- mirR 18 3013
-----AAAGCTAGATAACCGAAAAGTA----- mirR 21 2159
-----TAAAGCTAGATAACCGAA----- mirR 18 1733
-----AAAGCTAGATAACCGAAAAGT----- mirR 20 520
-----AAAGCTAGATAACCGAAAAGTAAA----- mirR 23 353
-----AAAGCTAGATAACCGAAA----- mirR 18 343
-----AAAGCTAGATAACCGAAAAG----- mirR 19 304
-----AAGCTAGATAACCGAAAAGTA----- mirR 20 120
-----AAGCTAGATAACCGAAAAGT----- mirR 19 82
-----AAGCTAGATAACCGAAAAGTAA----- mirR 21 78
-----AAGCTAGATAACCGAAAAG----- mirR 18 58
-----CATAAAGCTAGATAACCGAAA----- mirR 21 52
-----CATAAAGCTAGATAACCGA----- mirR 19 41
-----CATAAAGCTAGATAACCGAA----- mirR 20 35
-----AGCTAGATAACCGAAAAGTA----- mirR 19 30

```

```

-----AGCTAGATAACCGAAAGT----- mirR 18 29
-----CATAAAGCTAGATAACCGAAAGT----- mirR 23 23
-----AAAGCTAGATAACCGAAAGTAAAA----- mirR 24 20
-----TCATAAAGCTAGATAACCGAA----- mirR 21 15
-----AGCTAGATAACCGAAAGTAA----- mirR 20 14
-----CATAAAGCTAGATAACCGAAAG----- mirR 22 14
-----TCATAAAGCTAGATAACCGAAA----- mirR 22 10
-----TCATAAAGCTAGATAACCGA----- mirR 20 8
-----CATAAAGCTAGATAACCGAAAGTA----- mirR 24 7
-----AAGCTAGATAACCGAAAGTAAA----- mirR 22 6
-----AAGCTAGATAACCGAAAGTAAAA----- mirR 23 5
-----TCATAAAGCTAGATAACCGAAAGT----- mirR 24 3
-----CATAAAGCTAGATAACCGAAAGTAA----- mirR 25 3
-----AGCTAGATAACCGAAAGTAAA----- mirR 21 2
-----AGCTAGATAACCGAAAGTAAAA----- mirR 22 1
-----TCATAAAGCTAGATAACCGAAAGTAA----- mirR 26 1
-----AAGCTAGATAACCGAAAGTAAAAATA----- mirR 27 1
-----AAAATAACCCCATACACTGCGCAGAG--- morR 26 2
-----AAAATAACCCCATACACTGCGCAGAGGGC morR 29 1
-----AAAATAACCCCATACACTGCG----- morR 21 1

```

>mmu-mir-9-2

```

TTGTGAGGGAAGCGAGTTGTTATCTTTGGTTATCTAGCTGTATGAGTGTATTGGTCTTCATAAAGCTAGATAACCGAAAGTAAAACTCCTTCAAGGTCACCGA species len reads
--GTGAGGGAAGCGAGTTGTTA----- morL 20 1
TTGTGAGGGAAGCGAGTTG----- morL 19 1
----GAGGGAAGCGAGTTGTTA----- morL 18 1
-----GGGAAGCGAGTTGTTATCT----- morL 19 1
-----TCTTTGGTTATCTAGCTGTAT----- mirL 21 415640
-----TCTTTGGTTATCTAGCTGTATGA----- mirL 23 352237
-----TCTTTGGTTATCTAGCTGTATG----- mirL 22 214745
-----TCTTTGGTTATCTAGCTGTA----- mirL 20 53768
-----TCTTTGGTTATCTAGCTGT----- mirL 19 41211
-----CTTTGGTTATCTAGCTGTATGA----- mirL 22 29635
-----CTTTGGTTATCTAGCTGTAT----- mirL 20 23755
-----TCTTTGGTTATCTAGCTG----- mirL 18 17793
-----CTTTGGTTATCTAGCTGTATG----- mirL 21 14157
-----TCTTTGGTTATCTAGCTGTATGAG----- mirL 24 7186
-----CTTTGGTTATCTAGCTGTA----- mirL 19 5165
-----CTTTGGTTATCTAGCTGT----- mirL 18 2638
-----TTTGGTTATCTAGCTGTATGA----- mirL 21 1751
-----CTTTGGTTATCTAGCTGTATGAG----- mirL 23 978
-----TTTGGTTATCTAGCTGTAT----- mirL 19 510
-----TTTGGTTATCTAGCTGTATG----- mirL 20 377
-----TTGGTTATCTAGCTGTATGA----- mirL 20 263
-----TTTGGTTATCTAGCTGTATGAG----- mirL 22 188
-----CTTTGGTTATCTAGCTGTATGAGT----- mirL 24 161

```



```

-----TTGGTTATCTAGCTGTAT----- mirL 18 101
-----ATCTTTGGTTATCTAGCTGTAT----- mirL 22 99
-----TTTGGTTATCTAGCTGTATGAGT----- mirL 23 86
-----TTTGGTTATCTAGCTGTAT----- mirL 18 78
-----TTGGTTATCTAGCTGTATG----- mirL 19 71
-----ATCTTTGGTTATCTAGCTGTATGA----- mirL 24 70
-----ATCTTTGGTTATCTAGCTGTATG----- mirL 23 37
-----ATCTTTGGTTATCTAGCTGTATGAG----- mirL 25 22
-----ATCTTTGGTTATCTAGCTGT----- mirL 20 15
-----TTTGGTTATCTAGCTGTATGAGTG----- mirL 24 14
-----ATCTTTGGTTATCTAGCTGT----- mirL 19 13
-----TTGGTTATCTAGCTGTATGAG----- mirL 21 12
-----ATCTTTGGTTATCTAGCTGTAT----- mirL 21 11
-----TTGGTTATCTAGCTGTATGAGT----- mirL 22 10
-----TATCTTTGGTTATCTAGCTGTATGA----- mirL 25 9
-----TTATCTTTGGTTATCTAGCTGTAT----- mirL 24 8
-----TTATCTTTGGTTATCTAGCTGTATG----- mirL 25 5
-----TATCTTTGGTTATCTAGCTGTAT----- mirL 23 5
-----TATCTTTGGTTATCTAGCTGT----- mirL 20 4
-----TTATCTTTGGTTATCTAGCTGT----- mirL 21 4
-----TTATCTTTGGTTATCTAGCTGTATGA----- mirL 26 4
-----TATCTTTGGTTATCTAGCTGTATGAG----- mirL 26 1
-----TATCTTTGGTTATCTAGCTGTAT----- mirL 22 1
-----TATCTTTGGTTATCTAGCTGT----- mirL 21 1
-----TATGAGTGTATTGGTCTT----- loop 18 1
-----TGAGTGTATTGGTCTTCA----- loop 18 1
-----TATGAGTGTATTGGTCTTCATA----- loop 22 1
-----TAAAGCTAGATAACCGAAAGTAA----- mirR 23 111539
-----TAAAGCTAGATAACCGAAAGTA----- mirR 22 58234
-----ATAAAGCTAGATAACCGAAAGT----- mirR 22 33343
-----ATAAAGCTAGATAACCGAAAGTA----- mirR 23 21246
-----ATAAAGCTAGATAACCGAAA----- mirR 20 12793
-----ATAAAGCTAGATAACCGAAAGTAA----- mirR 24 10992
-----ATAAAGCTAGATAACCGAAAG----- mirR 21 9238
-----ATAAAGCTAGATAACCGAA----- mirR 19 7487
-----TAAAGCTAGATAACCGAAAGT----- mirR 21 7211
-----TAAAGCTAGATAACCGAAA----- mirR 19 7187
-----TAAAGCTAGATAACCGAAAG----- mirR 20 6757
-----TAAAGCTAGATAACCGAAAGTAAA----- mirR 24 5099
-----AAAGCTAGATAACCGAAAGTAA----- mirR 22 4987
-----ATAAAGCTAGATAACCGA----- mirR 18 3013
-----AAAGCTAGATAACCGAAAGTA----- mirR 21 2159
-----TAAAGCTAGATAACCGAA----- mirR 18 1733
-----AAAGCTAGATAACCGAAAGT----- mirR 20 520
-----AAAGCTAGATAACCGAAAGTAAA----- mirR 23 353
-----AAAGCTAGATAACCGAAA----- mirR 18 343

```

```

-----AAAGCTAGATAACCGAAAG----- mirR 19 304
-----AAGCTAGATAACCGAAAGTA----- mirR 20 120
-----AAGCTAGATAACCGAAAGT----- mirR 19 82
-----AAGCTAGATAACCGAAAGTAA----- mirR 21 78
-----AAGCTAGATAACCGAAAG----- mirR 18 58
-----CATAAAGCTAGATAACCGAAA----- mirR 21 52
-----CATAAAGCTAGATAACCGA----- mirR 19 41
-----CATAAAGCTAGATAACCGAA----- mirR 20 35
-----AGCTAGATAACCGAAAGTA----- mirR 19 30
-----AGCTAGATAACCGAAAGT----- mirR 18 29
-----CATAAAGCTAGATAACCGAAAGT----- mirR 23 23
-----AAAGCTAGATAACCGAAAGTAAAA----- mirR 24 20
-----TCATAAAGCTAGATAACCGAA----- mirR 21 15
-----CATAAAGCTAGATAACCGAAAG----- mirR 22 14
-----AGCTAGATAACCGAAAGTAA----- mirR 20 14
-----TCATAAAGCTAGATAACCGAAA----- mirR 22 10
-----TCATAAAGCTAGATAACCGA----- mirR 20 8
-----CATAAAGCTAGATAACCGAAAGTA----- mirR 24 7
-----AAGCTAGATAACCGAAAGTAAA----- mirR 22 6
-----AAGCTAGATAACCGAAAGTAAAA----- mirR 23 5
-----CATAAAGCTAGATAACCGAAAGTAA----- mirR 25 3
-----TCATAAAGCTAGATAACCGAAAGT----- mirR 24 3
-----AGCTAGATAACCGAAAGTAAA----- mirR 21 2
-----AGCTAGATAACCGAAAGTAAAA----- mirR 22 1
-----TCATAAAGCTAGATAACCGAAAGTAA----- mirR 26 1
-----AAAACCTCTTCAAGGTCACCGA morR 22 1
-----ACTCCTTCAAGGTCACCG- morR 18 1
-----AAAACCTCTTCAAGGTCAC- morR 19 1
-----CTCCTTCAAGGTCACCGA morR 18 1

```

>mmu-mir-9-3

```

CGGCGAATGGGAGGCCCGTTTCTCTCTTTGGTTATCTAGCTGTATGAGTGCCACAGAGCCGTCATAAAGCTAGATAACCGAAAGTAGAAATGACTCTCACAACTTCTGCGTGCGATGGC species len reads
CGGCGAATGGGAGGCCCGTTTCTCTCTCTTTGGTTATCTAGCTGTATGAGTGCCACAGAGCCGTCATAAAGCTAGATAACCGAAAGTAGAAATGACTCTCACAACTTCTGCGTGCGATGGC morL 22 1
---CGAATGGGAGGCCCGTTT----- morL 18 1
-----TCTTTGGTTATCTAGCTGTAT----- mirL 21 415640
-----TCTTTGGTTATCTAGCTGTATGA----- mirL 23 352237
-----TCTTTGGTTATCTAGCTGTATG----- mirL 22 214745
-----TCTTTGGTTATCTAGCTGTA----- mirL 20 53768
-----TCTTTGGTTATCTAGCTGT----- mirL 19 41211
-----CTTTGGTTATCTAGCTGTATGA----- mirL 22 29635
-----CTTTGGTTATCTAGCTGTAT----- mirL 20 23755
-----TCTTTGGTTATCTAGCTG----- mirL 18 17793
-----CTTTGGTTATCTAGCTGTATG----- mirL 21 14157
-----TCTTTGGTTATCTAGCTGTATGAG----- mirL 24 7187
-----CTTTGGTTATCTAGCTGTA----- mirL 19 5165
-----CTTTGGTTATCTAGCTGT----- mirL 18 2638

```

```

-----TTTGGTTATCTAGCTGTATGA----- mirL 21 1751
-----CTTTGGTTATCTAGCTGTATGAG----- mirL 23 978
-----TTTGGTTATCTAGCTGTAT----- mirL 19 510
-----TTTGGTTATCTAGCTGTATG----- mirL 20 377
-----TTGGTTATCTAGCTGTATGA----- mirL 20 263
-----TTTGGTTATCTAGCTGTATGAG----- mirL 22 184
-----CTTTGGTTATCTAGCTGTATGAGT----- mirL 24 161
-----TTGGTTATCTAGCTGTAT----- mirL 18 101
-----TTTGGTTATCTAGCTGTATGAGT----- mirL 23 86
-----TTTGGTTATCTAGCTGTATG----- mirL 18 78
-----TTGGTTATCTAGCTGTATG----- mirL 19 71
-----CTCTTTGGTTATCTAGCTGTAT----- mirL 22 47
-----CTCTTTGGTTATCTAGCTGTATGA----- mirL 24 16
-----TTTGGTTATCTAGCTGTATGAGTG----- mirL 24 14
-----TTGGTTATCTAGCTGTATGAG----- mirL 21 12
-----TTGGTTATCTAGCTGTATGAGT----- mirL 22 10
-----CTCTTTGGTTATCTAGCTGTATG----- mirL 23 7
-----CTCTCTTTGGTTATCTAGCTGTAT----- mirL 24 5
-----CTCTCTTTGGTTATCTAGCTGTATGA----- mirL 26 3
-----CTCTTTGGTTATCTAGCT----- mirL 18 3
-----CTCTTTGGTTATCTAGCTGTAT----- mirL 21 3
-----CTCTTTGGTTATCTAGCTGTATGAG----- mirL 25 3
-----CTCTTTGGTTATCTAGCTGT----- mirL 20 2
-----TCTCTTTGGTTATCTAGCTGTAT----- mirL 23 1
-----CTCTCTTTGGTTATCTAG----- mirL 18 1
-----TTGGTTATCTAGCTGTATGAGTGCC----- mirL 25 1
-----TCTCTTTGGTTATCTAGCTGTATGA----- mirL 25 1
-----CTCTCTTTGGTTATCTAGCTGTATG----- mirL 25 1
-----CTCTCTTTGGTTATCTAGCTG----- mirL 21 1
-----TGAGTGCCACAGAGCCGT----- loop 18 1
-----TAAAGCTAGATAACCGAAAGTA----- mirR 22 57976
-----TAAAGCTAGATAACCGAAAGTAG----- mirR 23 51662
-----ATAAAGCTAGATAACCGAAAGT----- mirR 22 33343
-----ATAAAGCTAGATAACCGAAAGTA----- mirR 23 21246
-----ATAAAGCTAGATAACCGAAA----- mirR 20 12792
-----ATAAAGCTAGATAACCGAAAG----- mirR 21 9238
-----ATAAAGCTAGATAACCGAA----- mirR 19 7486
-----TAAAGCTAGATAACCGAAA----- mirR 19 7215
-----TAAAGCTAGATAACCGAAAGT----- mirR 21 7211
-----TAAAGCTAGATAACCGAAAG----- mirR 20 6758
-----ATAAAGCTAGATAACCGAAAGTAG----- mirR 24 4732
-----TAAAGCTAGATAACCGAAAGTAGA----- mirR 24 3046
-----ATAAAGCTAGATAACCGA----- mirR 18 3013
-----AAAGCTAGATAACCGAAAGTA----- mirR 21 2159
-----AAAGCTAGATAACCGAAAGTAG----- mirR 22 1942
-----TAAAGCTAGATAACCGAA----- mirR 18 1733

```

```

-----AAAGCTAGATAACCGAAAAGT----- mirR 20 520
-----AAAGCTAGATAAACCAGAAA----- mirR 18 343
-----AAAGCTAGATAAACCAGAAAAG----- mirR 19 304
-----AAAGCTAGATAAACCAGAAAAGTAGA----- mirR 23 247
-----AAGCTAGATAAACCAGAAAAGTA----- mirR 20 120
-----AAGCTAGATAAACCAGAAAAGT----- mirR 19 82
-----AAGCTAGATAAACCAGAAAAG----- mirR 18 58
-----CATAAAGCTAGATAAACCAGAAA----- mirR 21 52
-----CATAAAGCTAGATAAACCAG----- mirR 19 41
-----CATAAAGCTAGATAAACCAGAA----- mirR 20 35
-----AGCTAGATAAACCAGAAAAGTA----- mirR 19 30
-----AGCTAGATAAACCAGAAAAGT----- mirR 18 29
-----AAAGCTAGATAAACCAGAAAAGTAGAA----- mirR 24 27
-----CATAAAGCTAGATAAACCAGAAAAGT----- mirR 23 23
-----AAGCTAGATAAACCAGAAAAGTAG----- mirR 21 22
-----TCATAAAGCTAGATAAACCAGAA----- mirR 21 15
-----CATAAAGCTAGATAAACCAGAAAAG----- mirR 22 14
-----TCATAAAGCTAGATAAACCAGAAA----- mirR 22 10
-----TCATAAAGCTAGATAAACCAG----- mirR 20 8
-----CATAAAGCTAGATAAACCAGAAAAGTA----- mirR 24 7
-----AGCTAGATAAACCAGAAAAGTAG----- mirR 20 5
-----AAGCTAGATAAACCAGAAAAGTAGA----- mirR 22 4
-----TCATAAAGCTAGATAAACCAGAAAAGT----- mirR 24 3
-----CATAAAGCTAGATAAACCAGAAAAGTAG----- mirR 25 3
-----AAGCTAGATAAACCAGAAAAGTAGAA----- mirR 23 1
-----AGCTAGATAAACCAGAAAAGTAGAA----- mirR 22 1
-----AAGCTAGATAAACCAGAAAAGTAGAAA----- mirR 24 1
-----AGCTAGATAAACCAGAAAAGTAGA----- mirR 21 1
-----AGAAATGACTCTCACAAAC----- morR 18 40
-----GAAATGACTCTCACAACTTCTGCGTGCGATGGC morR 33 1

```

>mmu-mir-26a-2

```

GTGGAGGCTGCGGCTGGATTCAAGTAATCCAGGATAGGCTGTGTCCGTCCATGAGGCCTGTTCTTGATTACTTGTCTTCTGGAGGCAGCGCATGGTC species len reads
GTGGAGGCTGCGGCTGGAT----- morL 19 1
GTGGAGGCTGCGGCTGGATT----- morL 20 1
-----TTCAAGTAATCCAGGATAGGCT----- mirL 22 600192
-----TTCAAGTAATCCAGGATAGGC----- mirL 21 259412
-----TTCAAGTAATCCAGGATAG----- mirL 19 140326
-----TTCAAGTAATCCAGGATAGGCTG----- mirL 23 133673
-----TTCAAGTAATCCAGGATAGG----- mirL 20 49536
-----TTCAAGTAATCCAGGATAGGCTGT----- mirL 24 29713
-----TCAAGTAATCCAGGATAGGCT----- mirL 21 29489
-----TTCAAGTAATCCAGGATA----- mirL 18 25764
-----TCAAGTAATCCAGGATAGGCTG----- mirL 22 10262
-----TCAAGTAATCCAGGATAGGC----- mirL 20 8383
-----TCAAGTAATCCAGGATAG----- mirL 18 5908

```

```

-----TCAAGTAATCCAGGATAGG----- mirL 19 2502
-----TCAAGTAATCCAGGATAGGCTGT----- mirL 23 2414
-----TCAAGTAATCCAGGATAGGCTGTG----- mirL 24 693
-----CAAGTAATCCAGGATAGGCT----- mirL 20 410
-----AAGTAATCCAGGATAGGCT----- mirL 19 277
-----CAAGTAATCCAGGATAGGC----- mirL 19 168
-----ATTCAAGTAATCCAGGATAGGC----- mirL 22 148
-----AAGTAATCCAGGATAGGC----- mirL 18 118
-----CAAGTAATCCAGGATAGGCTG----- mirL 21 98
-----ATTCAAGTAATCCAGGATAGGCT----- mirL 23 92
-----AAGTAATCCAGGATAGGCTG----- mirL 20 86
-----ATTCAAGTAATCCAGGATAG----- mirL 20 43
-----CAAGTAATCCAGGATAGG----- mirL 18 31
-----CAAGTAATCCAGGATAGGCTGT----- mirL 22 22
-----AAGTAATCCAGGATAGGCTGT----- mirL 21 20
-----ATTCAAGTAATCCAGGATAGGCTG----- mirL 24 18
-----ATTCAAGTAATCCAGGATA----- mirL 19 14
-----ATTCAAGTAATCCAGGATAGG----- mirL 21 9
-----ATTCAAGTAATCCAGGAT----- mirL 18 6
-----AAGTAATCCAGGATAGGCTGTG----- mirL 22 6
-----CAAGTAATCCAGGATAGGCTGTG----- mirL 23 5
-----GATTCAAGTAATCCAGGATAGGCT----- mirL 24 4
-----GGATTCAAGTAATCCAGGATAGGCT----- mirL 25 4
-----GATTCAAGTAATCCAGGATAGGC----- mirL 23 4
-----GGATTCAAGTAATCCAGGATAG----- mirL 22 4
-----GATTCAAGTAATCCAGGATAG----- mirL 21 3
-----GATTCAAGTAATCCAGGATAGG----- mirL 22 3
-----GGATTCAAGTAATCCAGGATAGGC----- mirL 24 3
-----GATTCAAGTAATCCAGGAT----- mirL 19 2
-----GATTCAAGTAATCCAGGATA----- mirL 20 2
-----GATTCAAGTAATCCAGGA----- mirL 18 2
-----GGATTCAAGTAATCCAGGATAGG----- mirL 23 1
-----GGATTCAAGTAATCCAGGATA----- mirL 21 1
-----GGATTCAAGTAATCCAGGAT----- mirL 20 1
-----GTGTCCGTCCATGAGGCC----- loop 18 1
-----CCTGTTCTTGATTACTTGTTTC----- mirR 22 511
-----CCTGTTCTTGATTACTTGTT----- mirR 21 135
-----CCTGTTCTTGATTACTTGTT----- mirR 20 134
-----CCTGTTCTTGATTACTTGTTCT----- mirR 23 103
-----CCTGTTCTTGATTACTTGTT----- mirR 19 31
-----CCTGTTCTTGATTACTTG----- mirR 18 15
-----CCTGTTCTTGATTACTTGTTTCTG----- mirR 24 8
-----AGGCCTGTTCTTGATTACTTGTT----- mirR 24 5
-----AGGCCTGTTCTTGATTACTTGTT----- mirR 23 3
-----GTTCTTGATTACTTGTT----- mirR 18 3
-----CTGTTCTTGATTACTTGTTTCT----- mirR 22 3

```

```

-----AGGCCTGTTCTTGATTACTTGT----- mirR 22 2
-----AGGCCTGTTCTTGATTAC----- mirR 18 2
-----AGGCCTGTTCTTGATTACTTGTTC----- mirR 25 1
-----CTGTTCTTGATTACTTGT----- mirR 19 1
-----TGTTCCTTGATTACTTGT----- mirR 18 1
-----GCCTGTTCTTGATTACTTG----- mirR 19 1
-----GGCCTGTTCTTGATTACTTGT----- mirR 22 1
-----GCCTGTTCTTGATTACTTGT----- mirR 22 1
-----TGGAGGCAGCGCATGGTC morR 18 2

```

>mmu-mir-26a-1

```

GGCGAAGGCCGTGGCCTCGTTCAAGTAATCCAGGATAGGCTGTGCAGGTCCAAGGGGCCTATTCTTGTTACTTGACAGGGG species len reads
GGCGAAGGCCGTGGCCTCG----- morL 19 2
-----TTCAAGTAATCCAGGATAGGCT----- mirL 22 600193
-----TTCAAGTAATCCAGGATAGGC----- mirL 21 259412
-----TTCAAGTAATCCAGGATAG----- mirL 19 140326
-----TTCAAGTAATCCAGGATAGGCTG----- mirL 23 133673
-----TTCAAGTAATCCAGGATAGG----- mirL 20 49536
-----TTCAAGTAATCCAGGATAGGCTGT----- mirL 24 29713
-----TCAAGTAATCCAGGATAGGCT----- mirL 21 29489
-----TTCAAGTAATCCAGGATA----- mirL 18 25764
-----TCAAGTAATCCAGGATAGGCTG----- mirL 22 10262
-----TCAAGTAATCCAGGATAGGC----- mirL 20 8381
-----TCAAGTAATCCAGGATAG----- mirL 18 5908
-----TCAAGTAATCCAGGATAGG----- mirL 19 2500
-----TCAAGTAATCCAGGATAGGCTGT----- mirL 23 2414
-----TCAAGTAATCCAGGATAGGCTGTG----- mirL 24 693
-----CAAGTAATCCAGGATAGGCT----- mirL 20 410
-----AAGTAATCCAGGATAGGCT----- mirL 19 277
-----CAAGTAATCCAGGATAGGC----- mirL 19 168
-----AAGTAATCCAGGATAGGC----- mirL 18 118
-----CAAGTAATCCAGGATAGGCTG----- mirL 21 98
-----AAGTAATCCAGGATAGGCTG----- mirL 20 86
-----GTTCAAGTAATCCAGGATAGGC----- mirL 22 76
-----CAAGTAATCCAGGATAGG----- mirL 18 31
-----GTTCAAGTAATCCAGGATAGGCT----- mirL 23 30
-----GTTCAAGTAATCCAGGATAG----- mirL 20 28
-----CAAGTAATCCAGGATAGGCTGT----- mirL 22 22
-----AAGTAATCCAGGATAGGCTGT----- mirL 21 20
-----CGTTCAAGTAATCCAGGATAGGCT----- mirL 24 9
-----GTTCAAGTAATCCAGGATAGGCTG----- mirL 24 9
-----TCGTTCAAGTAATCCAGGATAGGCT----- mirL 25 7
-----AAGTAATCCAGGATAGGCTGTG----- mirL 22 6
-----TCGTTCAAGTAATCCAGGATAGGC----- mirL 24 6
-----CGTTCAAGTAATCCAGGATAG----- mirL 21 5
-----CAAGTAATCCAGGATAGGCTGTGC----- mirL 24 5

```

```

-----CAAGTAATCCAGGATAGGCTGTG----- mirL 23 5
-----CGTTCAAGTAATCCAGGATAGGC----- mirL 23 4
-----TCGTTCAAGTAATCCAGGAT----- mirL 20 3
-----CGTTCAAGTAATCCAGGATAGG----- mirL 22 3
-----GTTCAAGTAATCCAGGATA----- mirL 19 3
-----GTTCAAGTAATCCAGGATAGG----- mirL 21 3
-----CGTTCAAGTAATCCAGGATA----- mirL 20 2
-----CGTTCAAGTAATCCAGGATAGGCTG----- mirL 25 2
-----AAGTAATCCAGGATAGGCTGTG----- mirL 23 2
-----GTTCAAGTAATCCAGGATAGGCTGT----- mirL 25 2
-----TCGTTCAAGTAATCCAGGATAGG----- mirL 23 1
-----CGTTCAAGTAATCCAGGAT----- mirL 19 1
-----TCGTTCAAGTAATCCAGGATAG----- mirL 22 1
-----GCTGTGCAGGTCCCAAGG----- loop 18 3
-----GTGCAGGTCCCAAGGGGCC----- loop 19 1
-----GTGCAGGTCCCAAGGGGC----- loop 18 1
-----CCTATTCTGGTTACTTGCACG--- mirR 22 381
-----CCTATTCTGGTTACTTGCAC--- mirR 21 130
-----CCTATTCTGGTTACTTGCACGG-- mirR 23 102
-----CCTATTCTGGTTACTTGCAC--- mirR 20 52
-----CCTATTCTGGTTACTTGC--- mirR 19 32
-----ATTCTTGGTTACTTGCACG--- mirR 19 31
-----CCTATTCTGGTTACTTGC--- mirR 18 23
-----CTATTCTGGTTACTTGCACG--- mirR 21 18
-----TATTCTTGGTTACTTGCACG--- mirR 20 16
-----CTATTCTGGTTACTTGCACGG-- mirR 22 8
-----ATTCTTGGTTACTTGCAC--- mirR 18 5
-----ATTCTTGGTTACTTGCACGG-- mirR 20 4
-----TATTCTTGGTTACTTGCACGG-- mirR 21 4
-----CCTATTCTGGTTACTTGCACGGG-- mirR 24 3
-----CTATTCTGGTTACTTGCAC--- mirR 19 3
-----TATTCTTGGTTACTTGCAC--- mirR 18 2
-----CTATTCTGGTTACTTGCACGGGG mirR 24 2
-----CTATTCTGGTTACTTGCAC--- mirR 20 1
-----GCCTATTCTGGTTACTTGC--- mirR 20 1
-----GCCTATTCTGGTTACTT----- mirR 18 1
-----GGGCCTATTCTGGTTAC----- mirR 18 1

>mmu-mir-218-1
TAATGGAGCGAGATTTTCTGTGTGCTTGATCTAACCATGTGCTTGCAGGATGAGAAAAACATGGTCCGTC AAGCACCATGGAACGTCACGC species len reads
-AATGGAGCGAGATTTTCTG----- morL 19 3
TAATGGAGCGAGATTTTC----- morL 18 1
---TGGAGCGAGATTTTCTGT----- morL 18 1
--ATGGAGCGAGATTTTCTGT----- morL 19 1
-----TTGTGCTTGATCTAACCATGT----- mirL 21 758162
-----TTGTGCTTGATCTAACCATGT----- mirL 22 205544

```

```

-----TTGTGCTTGATCTAACCATGTGC----- mirL 23 185863
-----TTGTGCTTGATCTAACCAT----- mirL 19 31255
-----TTGTGCTTGATCTAACCATG----- mirL 20 27195
-----TTGTGCTTGATCTAACCA----- mirL 18 20595
-----TGTGCTTGATCTAACCATGT----- mirL 20 16831
-----TGTGCTTGATCTAACCATGTG----- mirL 21 6894
-----TTGTGCTTGATCTAACCATGTGCT----- mirL 24 5281
-----TGTGCTTGATCTAACCATGTGC----- mirL 22 2141
-----TGTGCTTGATCTAACCATG----- mirL 19 919
-----TGTGCTTGATCTAACCAT----- mirL 18 316
-----GTGCTTGATCTAACCATGT----- mirL 19 310
-----TGTGCTTGATCTAACCATGTGCT----- mirL 23 200
-----TGCTTGATCTAACCATGT----- mirL 18 165
-----GTGCTTGATCTAACCATGTG----- mirL 20 115
-----TGTGCTTGATCTAACCATGTGCTT----- mirL 24 82
-----GTGCTTGATCTAACCATGTGC----- mirL 21 59
-----TGCTTGATCTAACCATGTG----- mirL 19 51
-----GTTGTGCTTGATCTAACCATGT----- mirL 22 39
-----TGCTTGATCTAACCATGTGC----- mirL 20 31
-----GTGCTTGATCTAACCATG----- mirL 18 24
-----GTTGTGCTTGATCTAACCATGTG----- mirL 23 8
-----TGCTTGATCTAACCATGTGCT----- mirL 21 7
-----TGCTTGATCTAACCATGTGCTT----- mirL 22 5
-----CTGTTGTGCTTGATCTAACCATGT----- mirL 24 4
-----GTGCTTGATCTAACCATGTGCT----- mirL 22 3
-----TGTGCTTGATCTAACCATGTG----- mirL 24 2
-----GTTGTGCTTGATCTAACCATGTGCT----- mirL 25 2
-----GTTGTGCTTGATCTAACCATGTGC----- mirL 24 2
-----TGTGCTTGATCTAACCATGT----- mirL 23 2
-----GTTGTGCTTGATCTAACCA----- mirL 19 2
-----GTGCTTGATCTAACCATGTGCTT----- mirL 23 1
-----GTGCTTGATCTAACCATGTGCTTGC----- mirL 25 1
-----TGTGCTTGATCTAACCATCTAACCA----- mirL 20 1
-----CTGTTGTGCTTGATCTAACCATGTGC----- mirL 26 1
-----TGTGCTTGCGAGGTATGA----- loop 18 7
-----TGCGAGGTATGAGAAAA----- loop 18 2
-----TGCTTGCGAGGTATGAGA----- loop 18 1
-----CTTGCGAGGTATGAGAAAA----- loop 20 1
-----TGCTTGCGAGGTATGAGAA----- loop 19 1
-----AAACATGGTTCCGTCAAGCAC----- mirR 21 757
-----AAACATGGTTCCGTCAAGCACC----- mirR 22 316
-----AAACATGGTTCCGTCAAGCA----- mirR 20 277
-----AAACATGGTTCCGTCAAGCACCA----- mirR 23 105
-----CATGGTTCCGTCAAGCACCATG----- mirR 22 51
-----AAACATGGTTCCGTCAAG----- mirR 18 32
-----CATGGTTCCGTCAAGCACCA----- mirR 20 29

```



```

-----CATGGTCCGTCAAGCACC----- mirR 19 29
-----AACATGGTCCGTCAAGCACCAT----- mirR 24 26
-----AACATGGTCCGTCAAGCAC----- mirR 20 26
-----AACATGGTCCGTCAAGC----- mirR 19 24
-----CATGGTCCGTCAAGCAC----- mirR 18 18
-----AACATGGTCCGTCAAGCACC----- mirR 21 13
-----AACATGGTCCGTCAAGCA----- mirR 19 12
-----ACATGGTCCGTCAAGCAC----- mirR 19 9
-----AACATGGTCCGTCAAGCACCA----- mirR 22 9
-----ACATGGTCCGTCAAGCACC----- mirR 20 8
-----ACATGGTCCGTCAAGCACCA----- mirR 21 5
-----ACATGGTCCGTCAAGCACCAT----- mirR 22 4
-----CATGGTCCGTCAAGCACCATGG----- mirR 23 4
-----AACATGGTCCGTCAAGCACCAT----- mirR 23 4
-----AAAACATGGTCCGTCAAGCA----- mirR 21 3
-----ACATGGTCCGTCAAGCACCATGG----- mirR 24 3
-----ACATGGTCCGTCAAGCA----- mirR 18 3
-----CATGGTCCGTCAAGCACCAT----- mirR 21 3
-----AAAACATGGTCCGTCAA----- mirR 18 2
-----AAAACATGGTCCGTCAAGCACC----- mirR 23 2
-----ACATGGTCCGTCAAGCACCATG----- mirR 23 2
-----AAAACATGGTCCGTCAAGCAC----- mirR 23 1
-----AACATGGTCCGTCAAGC----- mirR 18 1
-----AAAACATGGTCCGTCAAGCACCAT----- mirR 25 1
-----CACCATGGAACGTCACGC morR 18 1

```

>mmu-mir-129-2

```

GTAGACTGCCTTTTCGCGAATCTTTTTCGCGTCTGGGCTTGCTGTACATAACTCAATAGCCGGAAGCCCTTACCCCAAAAAGCATTCGCGGAGGGCGCGCTCGGCGACGTGACTGCAGC species len reads
--AGACTGCCTTTTCGCGAAT----- morL 18 7
GTAGACTGCCTTTTCGCGAAT----- morL 20 2
--AGACTGCCTTTTCGCGAATC----- morL 19 2
GTAGACTGCCTTTTCGCGAATC----- morL 21 1
GTAGACTGCCTTTTCGCGA----- morL 18 1
-----CTTTTTCGCGTCTGGGCTTGC----- mirL 21 23562
-----CTTTTTCGCGTCTGGGCTTGCT----- mirL 22 5278
-----CTTTTTCGCGTCTGGGCTTG----- mirL 20 1935
-----CTTTTTCGCGTCTGGGCTT----- mirL 19 1383
-----CTTTTTCGCGTCTGGGCTTGCTG----- mirL 23 1204
-----CTTTTTCGCGTCTGGGCT----- mirL 18 521
-----CTTTTTCGCGTCTGGGCTTGCTGT----- mirL 24 371
-----TTTTTTCGCGTCTGGGCTTGC----- mirL 20 30
-----TTTTCGCGTCTGGGCTTGC----- mirL 18 27
-----TTTTTTCGCGTCTGGGCTTGCT----- mirL 21 17
-----TTTTTTCGCGTCTGGGCTTGC----- mirL 19 17
-----TTTTTTCGCGTCTGGGCTTGCTGT----- mirL 23 17
-----TCTTTTTCGCGTCTGGGCTTGC----- mirL 22 14

```

```

-----TTTTGCGGTCTGGGCTTGCTG----- mirL 22 12
-----TTTGCGGTCTGGGCTTGCT----- mirL 19 6
-----TTTTGCGGTCTGGGCTTGCT----- mirL 20 6
-----TTTTGCGGTCTGGGCTTGCTGTA----- mirL 23 5
-----TTTTGCGGTCTGGGCTTGCTGT----- mirL 22 4
-----TTTTGCGGTCTGGGCTTGCTGTA----- mirL 24 4
-----TTTTGCGGTCTGGGCTTG----- mirL 19 3
-----ATCTTTTTGCGGTCTGGGCTTGC----- mirL 23 2
-----TCTTTTTGCGGTCTGGGCTTGCT----- mirL 23 2
-----ATCTTTTTGCGGTCTGGG----- mirL 18 2
-----TCTTTTTGCGGTCTGGGC----- mirL 18 2
-----TTTTGCGGTCTGGGCTTGCTG----- mirL 21 2
-----TTTTGCGGTCTGGGCTTG----- mirL 18 2
-----TCTTTTTGCGGTCTGGGCTTG----- mirL 21 1
-----TTTGCGGTCTGGGCTTGCTGT----- mirL 21 1
-----TTTTGCGGTCTGGGCTTGCTGTAC----- mirL 25 1
-----ATCTTTTTGCGGTCTGGGCTTG----- mirL 22 1
-----ATCTTTTTGCGGTCTGGGC----- mirL 19 1
-----TTTTGCGGTCTGGGCTTGCTGTAC----- mirL 24 1
-----TGTACATAACTCAATAGCCGGA----- loop 22 11
-----TGTACATAACTCAATAGCCGG----- loop 21 7
-----TGTACATAACTCAATAGCCGGA----- loop 23 3
-----TGTACATAACTCAATAGCCG----- loop 20 2
-----GTACATAACTCAATAGCCGGA----- loop 21 1
-----TGTACATAACTCAATAGCC----- loop 19 1
-----TGTACATAACTCAATAGC----- loop 18 1
-----CTGTACATAACTCAATAGC----- loop 19 1
-----AAGCCCTTACCCCAAAAAGCAT----- mirR 22 839316
-----AAGCCCTTACCCCAAAAAGCA----- mirR 21 144274
-----AAGCCCTTACCCCAAAAAGCATT----- mirR 23 89147
-----AAGCCCTTACCCCAAAAAGC----- mirR 20 47270
-----AAGCCCTTACCCCAAAAAGCATTC----- mirR 24 15954
-----AAGCCCTTACCCCAAAAAG----- mirR 19 9153
-----AAGCCCTTACCCCAAAA----- mirR 18 5990
-----AGCCCTTACCCCAAAAAGCAT----- mirR 21 3622
-----AGCCCTTACCCCAAAAAGCATT----- mirR 22 1878
-----AGCCCTTACCCCAAAAAGCATTC----- mirR 23 1474
-----GAAGCCCTTACCCCAAAAAGCA----- mirR 22 493
-----AGCCCTTACCCCAAAAAGC----- mirR 19 477
-----GCCCTTACCCCAAAAAGCAT----- mirR 20 466
-----AGCCCTTACCCCAAAAAGCA----- mirR 20 306
-----GAAGCCCTTACCCCAAAAAGCAT----- mirR 23 286
-----GGAAGCCCTTACCCCAAAAAGCA----- mirR 23 216
-----GGAAGCCCTTACCCCAAAAAGC----- mirR 22 211
-----GAAGCCCTTACCCCAAAAAGC----- mirR 21 202
-----GGAAGCCCTTACCCCAAAAAGCAT----- mirR 24 146

```

```

-----CCCTTACCCCAAAAAGCAT----- mirR 19 140
-----GGAAGCCCTTACCCCAAAA----- mirR 20 116
-----GGAAGCCCTTACCCCAAAA----- mirR 18 88
-----GGAAGCCCTTACCCCAAAA----- mirR 19 78
-----GAAGCCCTTACCCCAAAA----- mirR 19 69
-----GGAAGCCCTTACCCCAAAAAG----- mirR 21 57
-----GCCCTTACCCCAAAAAGCA----- mirR 19 50
-----GCCCTTACCCCAAAAAGCATT----- mirR 21 40
-----GAAGCCCTTACCCCAAAAAG----- mirR 20 40
-----AGCCCTTACCCCAAAAAG----- mirR 18 40
-----GAAGCCCTTACCCCAAAA----- mirR 18 38
-----GAAGCCCTTACCCCAAAAAGCATT----- mirR 24 35
-----CCCTTACCCCAAAAAGCATT----- mirR 20 16
-----AGCCCTTACCCCAAAAAGCATTCG----- mirR 24 14
-----GCCCTTACCCCAAAAAGC----- mirR 18 14
-----CCCTTACCCCAAAAAGCA----- mirR 18 12
-----GCCCTTACCCCAAAAAGCATTC----- mirR 22 4
-----CCCTTACCCCAAAAAGCATTC----- mirR 21 1
-----CGGAAGCCCTTACCCCAAAAAGCAT----- mirR 25 1
-----TCGCGGAGGGCGCGCTCGGCGAC----- morR 23 1
-----TCGCGGAGGGCGCGCTCGGCG----- morR 21 1
-----TCGCGGAGGGCGCGCTCGGCGACGTGACTGCAGC morR 34 1
-----TCGCGGAGGGCGCGCTCGGC----- morR 20 1
-----TCGCGGAGGGCGCGCTCGGCGA----- morR 22 1

```

>mmu-mir-218-2

```

GACCAGTTGCCGCGGGGCTTTCCTTTGTGCTTGATCTAACCATGTGGTGAACGATGGAACCGAACATGGTTCTGTCAAGCACCGGAAAGCATCGCTCTCTCCTGCAGCATGGC species len reads
-----TTGCCGCGGGGCTTTCCT----- morL 18 5
-----GTTGCCGCGGGGCTTTCCT----- morL 19 4
-----AGTTGCCGCGGGGCTTTCCT----- morL 20 3
-----CAGTTGCCGCGGGGCTTTCCT----- morL 21 1
-----GCCGCGGGGCTTTCCTTT----- morL 18 1
-----ACCAGTTGCCGCGGGGCTTTC----- morL 22 1
-----CCAGTTGCCGCGGGGCTTTCCT----- morL 22 1
GACCAGTTGCCGCGGGGCTTTCCT----- morL 24 1
-----TTGCCGCGGGGCTTTCCT----- morL 19 1
-----TTGTGCTTGATCTAACCATGT----- mirL 21 758936
-----TTGTGCTTGATCTAACCATGTG----- mirL 22 205682
-----TTGTGCTTGATCTAACCATGTGG----- mirL 23 35698
-----TTGTGCTTGATCTAACCAT----- mirL 19 31455
-----TTGTGCTTGATCTAACCATG----- mirL 20 27209
-----TTGTGCTTGATCTAACCA----- mirL 18 20595
-----TGTGCTTGATCTAACCATGT----- mirL 20 16831
-----TGTGCTTGATCTAACCATGTG----- mirL 21 6930
-----TTGTGCTTGATCTAACCATGTGGT----- mirL 24 5510
-----TGTGCTTGATCTAACCATGTGG----- mirL 22 1552

```

```

-----TGTGCTTGATCTAACCATG----- mirL 19 920
-----TGTGCTTGATCTAACCAT----- mirL 18 316
-----GTGCTTGATCTAACCATGT----- mirL 19 310
-----TGTGCTTGATCTAACCATGTGGT----- mirL 23 202
-----TGCTTGATCTAACCATGT----- mirL 18 165
-----TTTGTGCTTGATCTAACCATGT----- mirL 22 123
-----GTGCTTGATCTAACCATGTG----- mirL 20 115
-----TGTGCTTGATCTAACCATGTGGTG----- mirL 24 61
-----TGCTTGATCTAACCATGTG----- mirL 19 51
-----GTGCTTGATCTAACCATG----- mirL 18 24
-----TTTGTGCTTGATCTAACCATGTG----- mirL 23 23
-----GTGCTTGATCTAACCATGTGG----- mirL 21 19
-----TGCTTGATCTAACCATGTGG----- mirL 20 18
-----TTTGTGCTTGATCTAACCATGTGG----- mirL 24 9
-----GTGCTTGATCTAACCATGTGGT----- mirL 22 8
-----CTTTGTGCTTGATCTAACCATGT----- mirL 23 8
-----TGCTTGATCTAACCATGTGGTG----- mirL 22 8
-----TGCTTGATCTAACCATGTGGT----- mirL 21 7
-----TGCTTGATCTAACCATGTGGTGG----- mirL 23 6
-----CTTTGTGCTTGATCTAACCATGTG----- mirL 24 4
-----TTTGTGCTTGATCTAACCATG----- mirL 21 4
-----CCTTTGTGCTTGATCTAACCATGT----- mirL 24 4
-----TTTGTGCTTGATCTAACC----- mirL 18 2
-----TTTGTGCTTGATCTAACCA----- mirL 19 2
-----CTTTGTGCTTGATCTAACCATGTGG----- mirL 25 2
-----CTTTGTGCTTGATCTAACCATG----- mirL 22 1
-----GTGCTTGATCTAACCATGTGGTG----- mirL 23 1
-----GTGCTTGATCTAACCATGTGGTGG----- mirL 24 1
-----TTTGTGCTTGATCTAACCATGTGGT----- mirL 25 1
-----TGCTTGATCTAACCATGTGGTGGA----- mirL 24 1
-----GGTGAACGATGGAACCGGAAC----- loop 22 75
-----GGTGAACGATGGAACCGGAACA----- loop 23 43
-----TGGAACGATGGAACCGGAAC----- loop 20 35
-----GGTGAACGATGGAACCGGAA----- loop 21 10
-----GGTGAACGATGGAACCGGA----- loop 20 8
-----TGGAACGATGGAACCGGAACA----- loop 21 7
-----GTGAACGATGGAACCGGAACA----- loop 22 4
-----GTGAACGATGGAACCGGAA----- loop 20 3
-----GTGAACGATGGAACCGGAAC----- loop 21 2
-----TGGAACGATGGAACCGGAACAT----- loop 22 1
-----TGGAACGATGGAACCGGA----- loop 18 1
-----GTGAACGATGGAACCGGA----- loop 19 1
-----CATGGTTCTGTCAAGCACCGCG----- mirR 22 1735
-----CATGGTTCTGTCAAGCACCGCG----- mirR 23 723
-----CATGGTTCTGTCAAGCACCGC----- mirR 21 587
-----CATGGTTCTGTCAAGCACCG----- mirR 20 519

```

```

-----CATGGTTCTGTCAAGCAC----- mirR 18 502
-----CATGGTTCTGTCAAGCACC----- mirR 19 314
-----ATGGTTCTGTCAAGCACC GCG----- mirR 22 271
-----ATGGTTCTGTCAAGCACC GCG----- mirR 21 219
-----CATGGTTCTGTCAAGCACC GCGGA----- mirR 24 135
-----ATGGTTCTGTCAAGCACC----- mirR 18 87
-----ATGGTTCTGTCAAGCACC G----- mirR 19 82
-----ATGGTTCTGTCAAGCACC G----- mirR 20 62
-----ATGGTTCTGTCAAGCACC GCGGA----- mirR 23 61
-----GGTTCTGTCAAGCACC GCG----- mirR 19 21
-----GAACATGGTTCTGTCAAGCAC----- mirR 21 15
-----TGGTTCTGTCAAGCACC GCG----- mirR 20 13
-----TGGTTCTGTCAAGCACC G----- mirR 18 11
-----GGTTCTGTCAAGCACC G----- mirR 18 11
-----TGGTTCTGTCAAGCACC G----- mirR 19 7
-----TGGTTCTGTCAAGCACC GCG----- mirR 21 7
-----GGTTCTGTCAAGCACC GCG----- mirR 20 6
-----GAACATGGTTCTGTCAAGCACC----- mirR 22 5
-----ACATGGTTCTGTCAAGCACC G----- mirR 22 4
-----AACATGGTTCTGTCAAGCACC G----- mirR 23 3
-----ATGGTTCTGTCAAGCACC GCGGAA----- mirR 24 2
-----AACATGGTTCTGTCAAGCAC----- mirR 20 2
-----AACATGGTTCTGTCAAGCACC G----- mirR 24 2
-----GAACATGGTTCTGTCAAGCACC G----- mirR 24 1
-----ACATGGTTCTGTCAAGCACC G----- mirR 21 1
-----GAACATGGTTCTGTCAAG----- mirR 18 1
-----TGGTTCTGTCAAGCACC GCGGA----- mirR 22 1
-----ACATGGTTCTGTCAAGCACC GCG----- mirR 23 1
-----GAAAGCATCGCTCTCTCC----- morR 18 1
-----GAAAGCATCGCTCTCTCTCAGCATGGC morR 29 1

```

>mmu-mir-99a

```

ACGATGCCATTGACATAAACCCGTAGATCCGATCTTGTGGTGAAGTGGACCGCGCAAGCTCGTTTCTATGGGTCTGTGGCAGTGTGGTGATCTGACA species len reads
ACGATGCCATTGACATA----- morL 18 1
-----AACCCGTAGATCCGATCTTGTG----- mirL 22 372235
-----AACCCGTAGATCCGATCTTGT----- mirL 21 291766
-----AACCCGTAGATCCGATCTTGTGG----- mirL 23 277795
-----AACCCGTAGATCCGATCTTGTGGT----- mirL 24 34605
-----AACCCGTAGATCCGATCTTGT----- mirL 20 26833
-----AACCCGTAGATCCGATCTT----- mirL 19 16970
-----AACCCGTAGATCCGATCT----- mirL 18 10726
-----AAACCCGTAGATCCGATCTTGT----- mirL 22 1811
-----ACCCGTAGATCCGATCTTGT----- mirL 20 1285
-----ACCCGTAGATCCGATCTTGTG----- mirL 21 1048
-----AAACCCGTAGATCCGATCTTGTG----- mirL 23 673
-----ACCCGTAGATCCGATCTTGTG----- mirL 22 497

```

```

-----ACCCGTAGATCCGATCTTG----- mirL 19 304
-----CCCGTAGATCCGATCTTGT----- mirL 19 145
-----CCCGTAGATCCGATCTTGTG----- mirL 20 133
-----ACCCGTAGATCCGATCTT----- mirL 18 118
-----AAACCCGTAGATCCGATCTTG----- mirL 21 118
-----AAACCCGTAGATCCGATCTTGTGG----- mirL 24 96
-----CCGTAGATCCGATCTTGT----- mirL 18 86
-----CCCGTAGATCCGATCTTGTGG----- mirL 21 77
-----ACCCGTAGATCCGATCTTGTGGT----- mirL 23 73
-----CCGTAGATCCGATCTTGTG----- mirL 19 63
-----AAACCCGTAGATCCGATCTT----- mirL 20 53
-----AAACCCGTAGATCCGATC----- mirL 18 51
-----CCGTAGATCCGATCTTGTGG----- mirL 20 34
-----AAACCCGTAGATCCGATCT----- mirL 19 24
-----CCCGTAGATCCGATCTTG----- mirL 18 21
-----TAAACCCGTAGATCCGATCTTGT----- mirL 23 11
-----CCCGTAGATCCGATCTTGTGGT----- mirL 22 9
-----ACCCGTAGATCCGATCTTGTGGTG----- mirL 24 9
-----TAAACCCGTAGATCCGATCTTGTG----- mirL 24 4
-----CCGTAGATCCGATCTTGTGGT----- mirL 21 3
-----CCCGTAGATCCGATCTTGTGGTGA----- mirL 24 2
-----ATAAACCCGTAGATCCGATCTTGT----- mirL 24 2
-----TAAACCCGTAGATCCGATCT----- mirL 20 1
-----TAAACCCGTAGATCCGATCTT----- mirL 21 1
-----TAAACCCGTAGATCCGATCTTGTGG----- mirL 25 1
-----TAAACCCGTAGATCCGATCTTGTGGT----- mirL 26 1
-----CAAGCTCGTTTCTATGGGTCTGT----- mirR 23 5557
-----CAAGCTCGTTTCTATGGGTCTG----- mirR 22 1858
-----CAAGCTCGTTTCTATGGGTCTGTG----- mirR 24 1370
-----CAAGCTCGTTTCTATGGGTCT----- mirR 20 1345
-----CAAGCTCGTTTCTATGGGTCT----- mirR 21 1155
-----CAAGCTCGTTTCTATGGGTCTGTGG----- mirR 25 727
-----AAGCTCGTTTCTATGGGTCTGT----- mirR 22 629
-----CAAGCTCGTTTCTATGGGT----- mirR 19 318
-----AAGCTCGTTTCTATGGGTCTGTG----- mirR 23 189
-----AAGCTCGTTTCTATGGGTCTGTGG----- mirR 24 178
-----AAGCTCGTTTCTATGGGTCT----- mirR 19 135
-----AAGCTCGTTTCTATGGGTCTG----- mirR 21 103
-----AAGCTCGTTTCTATGGGTCT----- mirR 20 73
-----AAGCTCGTTTCTATGGGTCTGTGGC----- mirR 25 26
-----AGCTCGTTTCTATGGGTCTG----- mirR 20 18
-----GCTCGTTTCTATGGGTCTG----- mirR 19 11
-----AGCTCGTTTCTATGGGTCTGTG----- mirR 22 8
-----AGCTCGTTTCTATGGGTCTGTGG----- mirR 23 5
-----GCTCGTTTCTATGGGTCTGT----- mirR 20 4
-----GCTCGTTTCTATGGGTCT----- mirR 18 4

```

```

-----AGCTCGTTTCTATGGGTCTGT----- mirR 21 4
-----GCTCGTTTCTATGGGTCTGTGG----- mirR 22 3
-----GCAAGCTCGTTTCTATGGGT----- mirR 20 3
-----GCAAGCTCGTTTCTATGGGT----- mirR 21 3
-----GCAAGCTCGTTTCTATGGGTCT----- mirR 22 3
-----AGCTCGTTTCTATGGGT----- mirR 18 3
-----AGCTCGTTTCTATGGGTCT----- mirR 19 2
-----CGCAAGCTCGTTTCTATGGGTCTGT----- mirR 25 1
-----TGGCAGTGTGGTGATCTGACA morR 21 2

```

>mmu-mir-204

| Species | len | reads  |
|---------|-----|--------|
| morL    | 20  | 20     |
| morL    | 19  | 14     |
| morL    | 18  | 9      |
| morL    | 18  | 4      |
| morL    | 21  | 3      |
| morL    | 19  | 2      |
| morL    | 18  | 2      |
| morL    | 18  | 1      |
| morL    | 18  | 1      |
| morL    | 22  | 1      |
| morL    | 22  | 1      |
| morL    | 23  | 1      |
| morL    | 20  | 1      |
| mirL    | 22  | 377706 |
| mirL    | 20  | 108165 |
| mirL    | 23  | 82635  |
| mirL    | 24  | 82142  |
| mirL    | 21  | 63988  |
| mirL    | 18  | 19880  |
| mirL    | 25  | 13286  |
| mirL    | 21  | 10714  |
| mirL    | 22  | 3861   |
| mirL    | 23  | 3482   |
| mirL    | 19  | 2562   |
| mirL    | 20  | 892    |
| mirL    | 24  | 312    |
| mirL    | 18  | 294    |
| mirL    | 20  | 149    |
| mirL    | 19  | 99     |
| mirL    | 23  | 79     |
| mirL    | 21  | 72     |
| mirL    | 22  | 56     |
| mirL    | 20  | 50     |
| mirL    | 22  | 45     |

```

-----CCCTTTGTCATCCTATGC----- mirL 18 39
-----CCTTTGTCATCCTATGCCTGA----- mirL 21 31
-----CTTCCCTTTGTCATCCTATGCCTG----- mirL 24 23
-----CTTCCCTTTGTCATCCTATGC----- mirL 21 22
-----CTTCCCTTTGTCATCCTA----- mirL 18 20
-----CCCTTTGTCATCCTATGC----- mirL 19 20
-----CCTTTGTCATCCTATGCC----- mirL 18 20
-----CTTCCCTTTGTCATCCTAT----- mirL 19 9
-----CCCTTTGTCATCCTATGCCTGAG----- mirL 23 7
-----CTTCCCTTTGTCATCCTATGCCTGA----- mirL 25 6
-----ACTTCCCTTTGTCATCCTATGCCT----- mirL 24 5
-----ACTTCCCTTTGTCATCCTATGCC----- mirL 23 4
-----CCTTTGTCATCCTATGCCTGAG----- mirL 22 4
-----ACTTCCCTTTGTCATCCTA----- mirL 19 2
-----CCCTTTGTCATCCTATGCCTGAGA----- mirL 24 1
-----GACTTCCCTTTGTCATCCTATGCC----- mirL 25 1
-----ACTTCCCTTTGTCATCCTATGCCTGA----- mirL 26 1
-----ACTTCCCTTTGTCATCCTAT----- mirL 20 1
-----GACTTCCCTTTGTCATCCTATGCC----- mirL 24 1
-----GACTTCCCTTTGTCATCCTATGC----- mirL 23 1
-----CCTTTGTCATCCTATGCCTGAGA----- mirL 23 1
-----GAGAATATATGAAGGAGGC----- loop 19 6
-----CCTGAGAATATATGAAG----- loop 18 3
-----GAGAATATATGAAGGAGGCT----- loop 20 1
-----GCTGGGAAGGCAAAGGGA----- mirR 18 570
-----GCTGGGAAGGCAAAGGGACGT----- mirR 21 498
-----GCTGGGAAGGCAAAGGGAC----- mirR 19 447
-----GCTGGGAAGGCAAAGGGACG----- mirR 20 309
-----GCTGGGAAGGCAAAGGGACGTTTC----- mirR 23 172
-----GCTGGGAAGGCAAAGGGACGTT----- mirR 22 141
-----GGCTGGGAAGGCAAAGGGACGT----- mirR 22 76
-----GGCTGGGAAGGCAAAGGGA----- mirR 19 59
-----GGCTGGGAAGGCAAAGGGAC----- mirR 20 32
-----GGCTGGGAAGGCAAAGGGACG----- mirR 21 21
-----GGCTGGGAAGGCAAAGGGACGTTTC----- mirR 24 16
-----GCTGGGAAGGCAAAGGGACGTTCA----- mirR 24 12
-----GGCTGGGAAGGCAAAGGGACGTT----- mirR 23 12
-----GGGAAGGCAAAGGGACGTT----- mirR 19 10
-----CTGGGAAGGCAAAGGGACGTT----- mirR 21 10
-----TGGGAAGGCAAAGGGACGTT----- mirR 20 9
-----TGGGAAGGCAAAGGGACG----- mirR 18 7
-----GGCTGGGAAGGCAAAGGGACGTTCA----- mirR 25 6
-----CTGGGAAGGCAAAGGGACGT----- mirR 20 4
-----TGGGAAGGCAAAGGGACGT----- mirR 19 4
-----GAGGCTGGGAAGGCAAAGGGAC----- mirR 22 3
-----CTGGGAAGGCAAAGGGAC----- mirR 19 3

```



```

-----GGGAAGGCAAAGGGACGT----- mirR 18 2
-----CTGGGAAGGCAAAGGGACGTTC----- mirR 22 2
-----TGGGAAGGCAAAGGGACGTTC----- mirR 21 2
-----GAGGCTGGGAAGGCAAAG----- mirR 18 2
-----AGGCTGGGAAGGCAAAGG----- mirR 18 1
-----CTGGGAAGGCAAAGGGAC----- mirR 18 1
-----TCAATTGTCATCACTGGCATCTTTTTTGGATCAT morR 33 1

```

>mmu-mir-103-2

| AGAGCTGTCTTCGTGCTTTTACAGCTTTTACAGTGCTGCCTTGTAGCATTCAGGTCAAGCAGCATTGTACAGGGCTATGAAAGAACCAAGAATGG | species | len | reads  |
|-------------------------------------------------------------------------------------------------|---------|-----|--------|
| -GAGCTGTCTTCGTGCTTTT                                                                            | morL    | 19  | 8      |
| --AGCTGTCTTCGTGCTTTT                                                                            | morL    | 18  | 7      |
| AGAGCTGTCTTCGTGCTTTT                                                                            | morL    | 20  | 2      |
| -GAGCTGTCTTCGTGCTTTTCA                                                                          | morL    | 20  | 1      |
| AGAGCTGTCTTCGTGCTTTTCA                                                                          | morL    | 21  | 1      |
| AGAGCTGTCTTCGTGCTTT                                                                             | morL    | 18  | 1      |
| -----AGCTTCTTTACAGTGCTGCCTTGT-----                                                              | mirL    | 24  | 388    |
| -----AGCTTCTTTACAGTGCTGCCT-----                                                                 | mirL    | 21  | 270    |
| -----AGCTTCTTTACAGTGCTGCCTTG-----                                                               | mirL    | 23  | 265    |
| -----AGCTTCTTTACAGTGCTGCC-----                                                                  | mirL    | 20  | 141    |
| -----AGCTTCTTTACAGTGCTGCCTTGTA-----                                                             | mirL    | 25  | 128    |
| -----AGCTTCTTTACAGTGCTGCCTT-----                                                                | mirL    | 22  | 94     |
| -----AGCTTCTTTACAGTGCTGC-----                                                                   | mirL    | 19  | 80     |
| -----CAGCTTCTTTACAGTGCTGCCT-----                                                                | mirL    | 22  | 20     |
| -----GCTTCTTTACAGTGCTGCCTTG-----                                                                | mirL    | 22  | 18     |
| -----CAGCTTCTTTACAGTGCTGC-----                                                                  | mirL    | 19  | 10     |
| -----CAGCTTCTTTACAGTGCTGCC-----                                                                 | mirL    | 21  | 7      |
| -----CAGCTTCTTTACAGTGCT-----                                                                    | mirL    | 18  | 7      |
| -----CTTCTTTACAGTGCTGCCTTG-----                                                                 | mirL    | 21  | 3      |
| -----TTCTTTACAGTGCTGCCTTG-----                                                                  | mirL    | 20  | 3      |
| -----GCTTCTTTACAGTGCTGC-----                                                                    | mirL    | 18  | 3      |
| -----CTTCTTTACAGTGCTGCCTT-----                                                                  | mirL    | 20  | 3      |
| -----GCTTCTTTACAGTGCTGCCTT-----                                                                 | mirL    | 21  | 2      |
| -----GCTTCTTTACAGTGCTGCC-----                                                                   | mirL    | 19  | 2      |
| -----GCTTCTTTACAGTGCTGCCT-----                                                                  | mirL    | 20  | 2      |
| -----CTTCTTTACAGTGCTGCCTTGT-----                                                                | mirL    | 22  | 1      |
| -----CAGCTTCTTTACAGTGCTGC-----                                                                  | mirL    | 20  | 1      |
| -----GCTTCTTTACAGTGCTGCCTTGT-----                                                               | mirL    | 23  | 1      |
| -----TTCTTTACAGTGCTGCCTT-----                                                                   | mirL    | 19  | 1      |
| -----TTCAGCTTCTTTACAGTGCT-----                                                                  | mirL    | 19  | 1      |
| -----TGTAGCATTCAGGTCAAG-----                                                                    | loop    | 18  | 1      |
| -----AGCAGCATTGTACAGGGCTATGA-----                                                               | mirR    | 23  | 498354 |
| -----AGCAGCATTGTACAGGGCTATG-----                                                                | mirR    | 22  | 45180  |
| -----AGCAGCATTGTACAGGGCTATGAA-----                                                              | mirR    | 24  | 34035  |
| -----AGCAGCATTGTACAGGGCTATGAAA-----                                                             | mirR    | 25  | 4072   |
| -----CAGCATTGTACAGGGCTATGA-----                                                                 | mirR    | 21  | 2698   |

```

-----GCAGCATTGTACAGGGCTATGA----- mirR 22 766
-----AGCAGCATTGTACAGGGCTATGAAAG----- mirR 26 610
-----CAGCATTGTACAGGGCTATGAA----- mirR 22 375
-----AGCATTGTACAGGGCTATGA----- mirR 20 307
-----AAGCAGCATTGTACAGGGCTATGA----- mirR 24 130
-----CAGCATTGTACAGGGCTATG----- mirR 20 114
-----AGCAGCATTGTACAGGGCTATGAAAGA----- mirR 27 96
-----GCAGCATTGTACAGGGCTATG----- mirR 21 95
-----AGCAGCATTGTACAGGGCTATGAAAGAAC----- mirR 29 62
-----GCAGCATTGTACAGGGCTATGAA----- mirR 23 58
-----CAGCATTGTACAGGGCTATGAAA----- mirR 23 54
-----AGCATTGTACAGGGCTATG----- mirR 19 40
-----AGCATTGTACAGGGCTATGAA----- mirR 21 36
-----AAGCAGCATTGTACAGGGCTATG----- mirR 23 30
-----AAGCAGCATTGTACAGGGCTATGAA----- mirR 25 12
-----GCAGCATTGTACAGGGCTATGAAA----- mirR 24 7
-----CAAGCAGCATTGTACAGGGCTATGA----- mirR 25 4
-----TCAAGCAGCATTGTACAGGGCTATGA----- mirR 26 4
-----GCAGCATTGTACAGGGCTATGAAAG----- mirR 25 3
-----CAAGCAGCATTGTACAGGGCTATG----- mirR 24 3
-----CAGCATTGTACAGGGCTATGAAAGAAC----- mirR 27 2
-----AAGCAGCATTGTACAGGGC----- mirR 19 2
-----AGCATTGTACAGGGCTATGAAA----- mirR 22 2
-----CAGCATTGTACAGGGCTATGAAAAG----- mirR 24 1
-----AAGCAGCATTGTACAGGGCTATGAAA----- mirR 26 1
-----CAGCATTGTACAGGGCTATGAAAGAACC----- mirR 28 1
-----TCAAGCAGCATTGTACAGGGCTATGAA----- mirR 27 1
-----TCAAGCAGCATTGTACAGGGCTATG----- mirR 25 1
-----AGCATTGTACAGGGCTATGAAAG----- mirR 23 1
-----TGAAAGAACCAAGAATGG morR 18 1

```

>mmu-mir-103-1

```

CTTGGAAGTTTTCTTACTGCCCTCGGCTTCTTTACAGTGCTGCCTTGTTGCATATGGATCAAGCAGCATTGTACAGGGCTATGAAGGCATTGAGACTTGTCTT species len reads
-----AAGTTTTCTTACTGCCCTC----- morL 19 4
-----GAAGTTTTCTTACTGCCCTC----- morL 20 2
CTTGGAAGTTTTCTTACTGCCCTC----- morL 24 1
-----AGTTTTCTTACTGCCCTC----- morL 18 1
-----GTTTTCTTACTGCCCTCG----- morL 18 1
-----GAAGTTTTCTTACTGCCCTCG----- morL 21 1
-----GGCTTCTTTACAGTGCTGCCTTGT----- mirL 24 408
-----GGCTTCTTTACAGTGCTGCCTTG----- mirL 23 199
-----GGCTTCTTTACAGTGCTGCCTTGT----- mirL 25 119
-----GGCTTCTTTACAGTGCTGCCT----- mirL 22 57
-----GGCTTCTTTACAGTGCTGCCT----- mirL 21 57
-----GGCTTCTTTACAGTGCTGCC----- mirL 20 51
-----GGCTTCTTTACAGTGCTGC----- mirL 19 44

```

```

-----GCTTCTTTACAGTGCTGCCTTG----- mirL 22 18
-----CTTCTTTACAGTGCTGCCTTG----- mirL 21 3
-----TTCTTTACAGTGCTGCCTTG----- mirL 20 3
-----GCTTCTTTACAGTGCTGC----- mirL 18 3
-----CTTCTTTACAGTGCTGCCTT----- mirL 20 3
-----GCTTCTTTACAGTGCTGCCTT----- mirL 21 2
-----GCTTCTTTACAGTGCTGCC----- mirL 19 2
-----TCGGCTTCTTTACAGTGCTGC----- mirL 21 2
-----GCTTCTTTACAGTGCTGCCT----- mirL 20 2
-----CTTCTTTACAGTGCTGCCTTGT----- mirL 22 1
-----CGGCTTCTTTACAGTGCTGC----- mirL 20 1
-----GCTTCTTTACAGTGCTGCCTTGT----- mirL 23 1
-----TTCTTTACAGTGCTGCCTT----- mirL 19 1
-----CTCGGCTTCTTTACAGTGCTGCCTTG----- mirL 26 1
-----GTTGCATATGGATCAAGC----- loop 18 1
-----AGCAGCATTGTACAGGGCTATGA----- mirR 23 498354
-----AGCAGCATTGTACAGGGCTATG----- mirR 22 45180
-----AGCAGCATTGTACAGGGCTATGAA----- mirR 24 34036
-----AGCAGCATTGTACAGGGCTATGAAG----- mirR 25 3404
-----CAGCATTGTACAGGGCTATGA----- mirR 21 2698
-----GCAGCATTGTACAGGGCTATGA----- mirR 22 766
-----AGCAGCATTGTACAGGGCTATGAAGG----- mirR 26 579
-----CAGCATTGTACAGGGCTATGAA----- mirR 22 372
-----AGCATTGTACAGGGCTATGA----- mirR 20 307
-----AGCAGCATTGTACAGGGCTATGAAGGC----- mirR 27 199
-----AAGCAGCATTGTACAGGGCTATGA----- mirR 24 130
-----CAGCATTGTACAGGGCTATG----- mirR 20 114
-----GCAGCATTGTACAGGGCTATG----- mirR 21 95
-----AGCAGCATTGTACAGGGCT----- mirR 19 61
-----GCAGCATTGTACAGGGCTATGAA----- mirR 23 58
-----AGCATTGTACAGGGCTATG----- mirR 19 40
-----AGCATTGTACAGGGCTATGAA----- mirR 21 36
-----CAGCATTGTACAGGGCTATGAAG----- mirR 23 30
-----AAGCAGCATTGTACAGGGCTATG----- mirR 23 30
-----GCAGCATTGTACAGGGCTATGAAG----- mirR 24 12
-----AAGCAGCATTGTACAGGGCTATGAA----- mirR 25 12
-----CAGCATTGTACAGGGCTATGAAGG----- mirR 24 4
-----CAAGCAGCATTGTACAGGGCTATGA----- mirR 25 4
-----TCAAGCAGCATTGTACAGGGCTATGA----- mirR 26 4
-----CAAGCAGCATTGTACAGGGCTATG----- mirR 24 3
-----GCAGCATTGTACAGGGCTATGAAGG----- mirR 25 2
-----AAGCAGCATTGTACAGGGC----- mirR 19 2
-----CAGCATTGTACAGGGCTATGAAGGC----- mirR 25 2
-----TCAAGCAGCATTGTACAGGGCTATG----- mirR 25 1
-----AGCATTGTACAGGGCTATGAAGG----- mirR 23 1
-----TCAAGCAGCATTGTACAGGGCTATGAA----- mirR 27 1

```

```

-----TGAAGGCATTGAGACTTGTTC morR 22 1
-----AGGCATTGAGACTTGTTC- morR 18 1

>mmu-mir-328
GCTGTCTCGGAGCCTGGGGCAGGGGGCAGGAGGGGCTCAGGGAGAAAGTATCTACAGCCCCTGGCCCTCTCTGCCCTTCCGTCCCCTGTCCCCAAGTACACTGGAC species len reads
--GTCTCGGAGCCTGGGGCA----- morL 18 18
--TGTCTCGGAGCCTGGGGCA----- morL 19 8
---CTCGGAGCCTGGGGCAGG----- morL 18 5
-CTGTCTCGGAGCCTGGGGCA----- morL 20 4
--TGTCTCGGAGCCTGGGGC----- morL 18 4
-CTGTCTCGGAGCCTGGGGC----- morL 19 3
--TGTCTCGGAGCCTGGGGCAG----- morL 20 2
---GTCTCGGAGCCTGGGGCAG----- morL 19 2
-CTGTCTCGGAGCCTGGGGCAG----- morL 21 1
GCTGTCTCGGAGCCTGGG----- morL 18 1
--GTCTCGGAGCCTGGGGCAGG----- morL 20 1
-----GGGGGCAGGAGGGGCTCAGGGA----- mirL 23 35
-----GGGGGCAGGAGGGGCTCAGG----- mirL 21 12
-----GGGGGCAGGAGGGGCTCAGG----- mirL 22 11
-----GGGGGCAGGAGGGGCTC----- mirL 18 10
-----GGGGGCAGGAGGGGCTCAGGGAG----- mirL 24 10
-----GGGGGCAGGAGGGGCTCAG----- mirL 20 9
-----AGGGGGCAGGAGGGGCT----- mirL 18 4
-----CAGGGGGCAGGAGGGG----- mirL 18 3
-----GGGGGCAGGAGGGGCTCAGGGAGA----- mirL 25 3
-----AGGGGGCAGGAGGGGCTC----- mirL 19 2
-----AGGGGGCAGGAGGGGCTCAGGGAG----- mirL 25 2
-----GGGGCAGGAGGGGCTCAGGGA----- mirL 22 1
-----GGGGCAGGAGGGGCTCAGGGAG----- mirL 23 1
-----AGGGGGCAGGAGGGGCTCAGGGA----- mirL 24 1
-----AAGTATCTACAGCCCCTG----- loop 18 4
-----AGAAAGTATCTACAGCCC----- loop 18 2
-----GAAAGTATCTACAGCCCCT----- loop 19 2
-----AAAGTATCTACAGCCCCT----- loop 18 1
-----GAAAGTATCTACAGCCC----- loop 18 1
-----CTGGCCCTCTCTGCCCTTCCGT----- mirR 22 204852
-----CTGGCCCTCTCTGCCCTTCCGTC----- mirR 23 132475
-----CTGGCCCTCTCTGCCCTTC----- mirR 19 72981
-----CTGGCCCTCTCTGCCCTTCCGTCC----- mirR 24 39177
-----CTGGCCCTCTCTGCCCTTC----- mirR 20 33624
-----CTGGCCCTCTCTGCCCTTCCG----- mirR 21 27662
-----CTGGCCCTCTCTGCCCTT----- mirR 18 21313
-----CCTGGCCCTCTCTGCCCTTCCGT----- mirR 23 1181
-----CCTGGCCCTCTCTGCCCTTC----- mirR 20 553
-----CCTGGCCCTCTCTGCCCTTCCGTCC----- mirR 25 479
-----CCTGGCCCTCTCTGCCCTTCCGTC----- mirR 24 432

```

```

-----CCTGGCCCTCTCTGCCCTTCC----- mirR 21 393
-----TGGCCCTCTCTGCCCTTCCGT----- mirR 21 368
-----CCTGGCCCTCTCTGCCCTTCCG----- mirR 22 290
-----CCTGGCCCTCTCTGCCCTT----- mirR 19 187
-----TGGCCCTCTCTGCCCTTCCGTC----- mirR 22 135
-----TGGCCCTCTCTGCCCTTCC----- mirR 18 82
-----GGCCCTCTCTGCCCTTCCGT----- mirR 20 75
-----TGGCCCTCTCTGCCCTTCCGTCC----- mirR 23 74
-----TGGCCCTCTCTGCCCTTCC----- mirR 19 39
-----TGGCCCTCTCTGCCCTTCCG----- mirR 20 32
-----GCCCTCTCTGCCCTTCCGT----- mirR 19 20
-----GGCCCTCTCTGCCCTTCCGTC----- mirR 21 15
-----TGGCCCTCTCTGCCCTTCCGTCCC----- mirR 24 12
-----GCCCTCTCTGCCCTTCCG----- mirR 18 9
-----GGCCCTCTCTGCCCTTCCGTCC----- mirR 22 9
-----GGCCCTCTCTGCCCTTCC----- mirR 18 8
-----CCCTGGCCCTCTCTGCCCTTCCGT----- mirR 24 7
-----GCCCTCTCTGCCCTTCCGTC----- mirR 20 5
-----GGCCCTCTCTGCCCTTCCG----- mirR 19 5
-----CCCTGGCCCTCTCTGCCCTTCCGTC----- mirR 25 5
-----CCCCTGGCCCTCTCTGCCCTTCCGT----- mirR 25 5
-----CCCCTGGCCCTCTCTGCC----- mirR 18 4
-----CCCTGGCCCTCTCTGCCCTTCC----- mirR 21 3
-----CCCTGGCCCTCTCTGCCCTT----- mirR 20 3
-----GCCCTCTCTGCCCTTCCGTC----- mirR 21 3
-----CCCTGGCCCTCTCTGCCCTTCC----- mirR 22 2
-----CCCCTGGCCCTCTCTGCCCTTCC----- mirR 22 2
-----GGCCCTCTCTGCCCTTCCGTCCCC----- mirR 24 2
-----CCCCTGGCCCTCTCTGCCCTT----- mirR 21 1
-----GGCCCTCTCTGCCCTTCCGTCCC----- mirR 23 1
-----CCCCTGGCCCTCTCTGCCCTTCCGTCC----- mirR 27 1
-----CCCTGGCCCTCTCTGCC----- mirR 18 1
-----TCCCCTGTCCCCAAGTAC----- morR 18 1
-----TCCCCTGTCCCCAAGTACTGGAC----- morR 25 1
-----CCCCTGTCCCCAAGTACTG----- morR 21 1

```

>mmu-mir-191

```

ATGGCTGGACAGCGGGCAACGGAATCCCAAAAGCAGCTGTTGTCTCCAGAGCATTCCAGCTGCACTTGGATTTCGTTCCCTGCCTCCTGCCTGAGCAGCG species len reads
ATGGCTGGACAGCGGGCA----- morL 18 1
-TGGCTGGACAGCGGGCAA----- morL 18 1
-----CAACGGAATCCCAAAAGCAGCT----- mirL 22 256371
-----CAACGGAATCCCAAAAGCAGC----- mirL 21 73215
-----CAACGGAATCCCAAAAGCAG----- mirL 20 68911
-----CAACGGAATCCCAAAAGCAGCTG----- mirL 23 57494
-----CAACGGAATCCCAAAAGCAGCTGT----- mirL 24 30980
-----CAACGGAATCCCAAAAGC----- mirL 18 18869

```

```

-----CAACGGAATCCCAAAAGCA----- mirL 19 12318
-----AACGGAATCCCAAAAGCAGCT----- mirL 21 1899
-----AACGGAATCCCAAAAGCAGCTGT----- mirL 23 916
-----AACGGAATCCCAAAAGCAGCTG----- mirL 22 863
-----AACGGAATCCCAAAAGCAGC----- mirL 20 718
-----AACGGAATCCCAAAAGCAG----- mirL 19 359
-----ACGGAATCCCAAAAGCAGCT----- mirL 20 289
-----CGGAATCCCAAAAGCAGCT----- mirL 19 225
-----AACGGAATCCCAAAAGCAGCTGTT----- mirL 24 212
-----GCAACGGAATCCCAAAAGCAGC----- mirL 22 129
-----CGGAATCCCAAAAGCAGCTG----- mirL 20 110
-----GCAACGGAATCCCAAAAGCAGCT----- mirL 23 94
-----AACGGAATCCCAAAAGCA----- mirL 18 89
-----ACGGAATCCCAAAAGCAGCTG----- mirL 21 84
-----GCAACGGAATCCCAAAAGCAG----- mirL 21 68
-----ACGGAATCCCAAAAGCAGC----- mirL 19 43
-----ACGGAATCCCAAAAGCAG----- mirL 18 41
-----CGGAATCCCAAAAGCAGC----- mirL 18 26
-----GCAACGGAATCCCAAAAGCAGCTG----- mirL 24 24
-----ACGGAATCCCAAAAGCAGCTGT----- mirL 22 20
-----CGGAATCCCAAAAGCAGCTGT----- mirL 21 17
-----GCAACGGAATCCCAAAAGCA----- mirL 20 15
-----GCAACGGAATCCCAAAAGC----- mirL 19 11
-----ACGGAATCCCAAAAGCAGCTGTT----- mirL 23 8
-----GGCAACGGAATCCCAAAAGCAGCT----- mirL 24 7
-----GCAACGGAATCCCAAAAGCAGCTGT----- mirL 25 7
-----GGCAACGGAATCCCAAAAGCAGC----- mirL 23 4
-----GGCAACGGAATCCCAAAAGCAG----- mirL 22 3
-----GGCAACGGAATCCCAAAAGC----- mirL 20 3
-----GGGCAACGGAATCCCAAAAGCAGCT----- mirL 25 3
-----GGGCAACGGAATCCCAAAAGCA----- mirL 22 2
-----GGCAACGGAATCCCAAAAGCAGCTG----- mirL 25 2
-----GGCAACGGAATCCCAAAAGCAGCTGT----- mirL 26 2
-----GGCAACGGAATCCCAAAAGCAGCTGTTG----- mirL 28 1
-----CGGAATCCCAAAAGCAGCTGTT----- mirL 22 1
-----GTTGTCTCCAGAGCATTCCAG----- loop 21 3
-----GTTGTCTCCAGAGCATTCCA----- loop 20 1
-----TTGTCTCCAGAGCATTCC----- loop 18 1
-----TGTTGTCTCCAGAGCATTCCAGC----- loop 23 1
-----TTGTCTCCAGAGCATTCCA----- loop 19 1
-----TGTCTCCAGAGCATTCCA----- loop 18 1
-----GCTGCACTTGGATTTCGTTCCC----- mirR 22 621
-----CTGCACTTGGATTTCGTTCCC----- mirR 21 380
-----GCTGCACTTGGATTTCGTTCC----- mirR 21 147
-----GCTGCACTTGGATTTCGTTCCCT----- mirR 23 95
-----CTGCACTTGGATTTCGTTCC----- mirR 20 92

```

```

-----GCTGCACTTGGATTTTCGTTCCCT----- mirR 20 81
-----CTGCACTTGGATTTTCGTTCCCT----- mirR 22 50
-----CTGCACTTGGATTTTCGTTCCCT----- mirR 19 24
-----TGCACCTTGGATTTTCGTTCCCT----- mirR 20 20
-----GCTGCACTTGGATTTTCGTTCCCTG----- mirR 24 16
-----GCACCTTGGATTTTCGTTCCCT----- mirR 19 15
-----CTGCACTTGGATTTTCGTTCCCTG----- mirR 23 14
-----GCTGCACTTGGATTTTCGTT----- mirR 19 14
-----GCTGCACTTGGATTTTCGTT----- mirR 18 13
-----TGCACCTTGGATTTTCGTTCCCT----- mirR 21 9
-----CTGCACTTGGATTTTCGTTCCCTG----- mirR 24 4
-----CTGCACTTGGATTTTCGTTCCCTGCT----- mirR 25 3
-----AGCTGCACTTGGATTTTCGTTCCCT----- mirR 23 3
-----GCACCTTGGATTTTCGTTCCCT----- mirR 18 3
-----AGCTGCACTTGGATTTTCGTT----- mirR 18 2
-----CCAGCTGCACTTGGATTTTCGTTCCCT----- mirR 25 2
-----AGCTGCACTTGGATTTTCGTT----- mirR 20 2
-----GCACCTTGGATTTTCGTTCCCT----- mirR 20 2
-----TGCACCTTGGATTTTCGTTCCCTG----- mirR 22 2
-----TGCACCTTGGATTTTCGTTCCCT----- mirR 18 1
-----CCAGCTGCACTTGGATTTTCGTTCCCT----- mirR 24 1
-----CCAGCTGCACTTGGATTTTCGTT----- mirR 18 1
-----CTCTCCTGCCTGAGCAGCG morR 19 1
-----CCTGCTCTCCTGCCTGAGC----- morR 19 1
-----CCTGCTCTCCTGCCTGAG----- morR 18 1
-----CCCTGCTCTCCTGCCTGAG----- morR 19 1

>mmu-let-7g
GGCTGAGGTAGTAGTTTGTACAGTTTGTAGGGTCTATGATACACCCGGTACAGGAGATAACTGTACAGGCCACTGCCTTGCCAGGAACAGTGCACCAGCTACC species len reads
---TGAGGTAGTAGTTTGTACAGTT----- mirL 22 237891
---TGAGGTAGTAGTTTGTACAGTT----- mirL 23 89132
---TGAGGTAGTAGTTTGTACAG----- mirL 20 55395
---TGAGGTAGTAGTTTGTACAGT----- mirL 21 54489
---TGAGGTAGTAGTTTGTACAGTTTG----- mirL 24 40167
---TGAGGTAGTAGTTTGTAC----- mirL 18 13043
---TGAGGTAGTAGTTTGTACA----- mirL 19 11407
---GAGGTAGTAGTTTGTACAGTT----- mirL 21 3499
---GAGGTAGTAGTTTGTACAGTT----- mirL 22 1677
---CTGAGGTAGTAGTTTGTACAGTT----- mirL 23 1257
---GAGGTAGTAGTTTGTACAG----- mirL 19 1037
---GAGGTAGTAGTTTGTACAGT----- mirL 20 717
---GAGGTAGTAGTTTGTACAGTTTG----- mirL 23 601
---CTGAGGTAGTAGTTTGTACAGT----- mirL 22 498
---CTGAGGTAGTAGTTTGTACAG----- mirL 21 400
---CTGAGGTAGTAGTTTGTACAGTT----- mirL 24 314
---CTGAGGTAGTAGTTTGTAC----- mirL 19 171

```

```

----GAGGTAGTAGTTTGTACA----- mirL 18 151
----GGTAGTAGTTTGTACAGTT----- mirL 19 134
----AGGTAGTAGTTTGTACAGTT----- mirL 20 87
--CTGAGGTAGTAGTTTGTACA----- mirL 20 73
--CTGAGGTAGTAGTTTGTACAGTTTG-- mirL 25 67
----AGGTAGTAGTTTGTACAG----- mirL 18 59
----GGTAGTAGTTTGTACAGTTT----- mirL 20 46
----AGGTAGTAGTTTGTACAGTTT----- mirL 21 43
--GAGGTAGTAGTTTGTACAGTTTGA-- mirL 24 40
----GGTAGTAGTTTGTACAGT----- mirL 18 35
----AGGTAGTAGTTTGTACAGT----- mirL 19 23
----AGGTAGTAGTTTGTACAGTTTG-- mirL 22 10
----GGTAGTAGTTTGTACAGTTTG-- mirL 21 9
----AGGTAGTAGTTTGTACAGTTTGA-- mirL 23 6
-GCTGAGGTAGTAGTTTGTACAGTT-- mirL 24 4
GGCTGAGGTAGTAGTTTGTACAGTT-- mirL 25 3
-GCTGAGGTAGTAGTTTGTACAGT-- mirL 23 3
-GCTGAGGTAGTAGTTTGTACAG----- mirL 22 2
----GGTAGTAGTTTGTACAGTTTGA-- mirL 22 2
----GGTAGTAGTTTGTACAGTTTGAGGGTC-- mirL 27 1
----GGTAGTAGTTTGTACAGTTTGAGGG-- mirL 25 1
-GCTGAGGTAGTAGTTTGTACA----- mirL 21 1
-GCTGAGGTAGTAGTTTGTACAGTTT-- mirL 25 1
GGCTGAGGTAGTAGTTTGTAC----- mirL 21 1
-----CTGTACAGGCCACTGCCTTGCC----- mirR 22 2095
-----CTGTACAGGCCACTGCCTTGC----- mirR 21 927
-----ACTGTACAGGCCACTGCCTTGC----- mirR 22 505
-----CTGTACAGGCCACTGCCTTGCCAG----- mirR 24 305
-----CTGTACAGGCCACTGCCTTGCCA----- mirR 23 289
-----CTGTACAGGCCACTGCCTTGCCAGG----- mirR 25 275
-----CTGTACAGGCCACTGCCTTG----- mirR 20 146
-----CTGTACAGGCCACTGCCTTGCCAGGA----- mirR 26 90
-----TACAGGCCACTGCCTTGC----- mirR 18 54
-----ACTGTACAGGCCACTGCCTTGCC----- mirR 23 49
-----ACTGTACAGGCCACTGCCTTG----- mirR 21 44
-----TGACAGGCCACTGCCTTGCCAG----- mirR 23 30
-----GTACAGGCCACTGCCTTG----- mirR 18 24
-----TGTACAGGCCACTGCCTTGCCA----- mirR 22 24
-----GTACAGGCCACTGCCTTGC----- mirR 19 21
-----TGTACAGGCCACTGCCTTGC----- mirR 20 19
-----TGTACAGGCCACTGCCTTGCCAGG----- mirR 24 16
-----TGTACAGGCCACTGCCTTGCC----- mirR 21 13
-----TGTACAGGCCACTGCCTTG----- mirR 19 11
-----ACTGTACAGGCCACTGCC----- mirR 18 9
-----GTACAGGCCACTGCCTTGCC----- mirR 20 8
-----ACTGTACAGGCCACTGCCTT----- mirR 20 8

```



```

-----AACTGTACAGGCCACTGCCTTGC----- mirR 23 5
-----TGTCAGGCCACTGCCTTGCCAGGA----- mirR 25 3
-----AACTGTACAGGCCACTGCC----- mirR 19 1
-----ACTGTACAGGCCACTGCCTTGCCAGGAAC----- mirR 29 1
-----GTACAGGCCACTGCCTTGCCAGG----- mirR 23 1
-----ACTGTACAGGCCACTGCCTTGCCA----- mirR 24 1
-----TACAGGCCACTGCCTTGC----- mirR 19 1
-----AACTGTACAGGCCACTGCCTTG----- mirR 22 1
-----CAGGAACAGTGCACCAGC----- morR 18 2
-----CCAGGAACAGTGCACCAG----- morR 18 2
-----GAACAGTGCACCAGCTACC morR 19 1

>mmu-mir-30c-2
CTAGAGAGCACTGAGTGACAGATATTGTAACATCCTACACTCTCAGCTGTGAAAAGTAAGAAAGCTGGGAGAAGGCTGTTTACTCTCTCGCCTTGAAAAT species len reads
---GAGAGCACTGAGTGACAGATAT----- morL 22 23
---GAGCACTGAGTGACAGATAT----- morL 20 13
---AGAGCACTGAGTGACAGATAT----- morL 21 5
---AGCACTGAGTGACAGATAT----- morL 19 3
---GAGAGCACTGAGTGACAGATATT----- morL 23 3
---AGCACTGAGTGACAGATA----- morL 18 1
CTAGAGAGCACTGAGTGACAGA----- morL 22 1
---ACTGAGTGACAGATATTG----- morL 18 1
-TAGAGAGCACTGAGTGACAGATATT----- morL 25 1
---GCACTGAGTGACAGATAT----- morL 18 1
---GAGCACTGAGTGACAGATA----- morL 19 1
---AGAGCACTGAGTGACAGA----- morL 18 1
---GAGCACTGAGTGACAGATATT----- morL 21 1
--AGAGAGCACTGAGTGACAGATAT----- morL 23 1
----GAGCACTGAGTGACAGAT----- morL 18 1
CTAGAGAGCACTGAGTGACAGATAT----- morL 25 1
---GAGAGCACTGAGTGACAGATA----- morL 21 1
-TAGAGAGCACTGAGTGACAGATA----- morL 23 1
-----TGTAACATCCTACACTCTCAGCT----- mirL 24 196125
-----TGTAACATCCTACACTCTCAGC----- mirL 23 149723
-----TGTAACATCCTACACTCTC----- mirL 20 68574
-----TGTAACATCCTACACTCTCAGCTG----- mirL 25 29425
-----TGTAACATCCTACACTCTCA----- mirL 21 18843
-----TGTAACATCCTACACTCT----- mirL 19 13904
-----GTAACATCCTACACTCTCAGCT----- mirL 23 12240
-----TGTAACATCCTACACTCTCAG----- mirL 22 8686
-----GTAACATCCTACACTCTCAGC----- mirL 22 6083
-----GTAACATCCTACACTCTCAGCTG----- mirL 24 1916
-----GTAACATCCTACACTCTC----- mirL 19 1415
-----GTAACATCCTACACTCTCA----- mirL 20 942
-----GTAACATCCTACACTCT----- mirL 18 752
-----GTAACATCCTACACTCTCAG----- mirL 21 495

```

```

-----AAACATCCTACACTCTCAGC----- mirL 20 114
-----TTGTA AACATCCTACACTCTCAGCT----- mirL 25 90
-----AAACATCCTACACTCTCAGCT----- mirL 21 87
-----TAAACATCCTACACTCTCAGCT----- mirL 22 85
-----TTGTA AACATCCTACACTCTCAGC----- mirL 24 65
-----TAAACATCCTACACTCTCAGC----- mirL 21 47
-----TATTGTA AACATCCTACACTCTCAGCT----- mirL 27 29
-----TTGTA AACATCCTACACTCTC----- mirL 21 29
-----AAACATCCTACACTCTCAGCTG----- mirL 22 23
-----AAACATCCTACACTCTCA----- mirL 18 21
-----TAAACATCCTACACTCTCA----- mirL 19 19
-----TAAACATCCTACACTCTC----- mirL 18 17
-----ATTGTA AACATCCTACACTCTCAGCT----- mirL 26 15
-----TTGTA AACATCCTACACTCTCAGCTG----- mirL 26 14
-----TATTGTA AACATCCTACACTCTC----- mirL 23 13
-----TAAACATCCTACACTCTCAGCTG----- mirL 23 10
-----TAAACATCCTACACTCTCAG----- mirL 20 10
-----TTGTA AACATCCTACACTC----- mirL 19 9
-----AAACATCCTACACTCTCAG----- mirL 19 8
-----TTGTA AACATCCTACACT----- mirL 18 7
-----TATTGTA AACATCCTACACTCTCA----- mirL 24 7
-----TTGTA AACATCCTACACTCTCAGCTGT----- mirL 27 7
-----ATTGTA AACATCCTACACTCTCAGC----- mirL 25 6
-----TATTGTA AACATCCTACACTCTCAGC----- mirL 26 4
-----ATTGTA AACATCCTACACTCTC----- mirL 22 4
-----ATTGTA AACATCCTACACTCTCAG----- mirL 24 3
-----TATTGTA AACATCCTACACTC----- mirL 21 2
-----TATTGTA AACATCCTACACTCTCAGCTG----- mirL 28 2
-----ATTGTA AACATCCTACACTCTCAGCTG----- mirL 27 1
-----ATTGTA AACATCCTACACT----- mirL 19 1
-----TATTGTA AACATCCTACACT----- mirL 20 1
-----ATTGTA AACATCCTACACTCTCA----- mirL 23 1
-----AAACATCCTACACTCTCAGCTGT----- mirL 23 1
-----AAACATCCTACACTCTCAGCTGTGA----- mirL 25 1
-----TAAACATCCTACACTCTCAGCTGT----- mirL 24 1
-----CTGTGAAAAGTAAGAAAG----- loop 18 2
-----GTGAAAAGTAAGAAAGCT----- loop 18 1
-----TGTGAAAAGTAAGAAAGCTG----- loop 20 1
-----CTGGGAGAAGGCTGTTTACTCT----- mirR 22 377
-----CTGGGAGAAGGCTGTTTACTCTC----- mirR 23 185
-----CTGGGAGAAGGCTGTTTACTC----- mirR 21 156
-----CTGGGAGAAGGCTGTTTA----- mirR 18 70
-----CTGGGAGAAGGCTGTTTAC----- mirR 19 53
-----CTGGGAGAAGGCTGTTTACT----- mirR 20 50
-----GGAGAAGGCTGTTTACTCT----- mirR 19 43
-----TGGGAGAAGGCTGTTTACTCT----- mirR 21 26

```

```

-----GGGAGAAGGCTGTTTACTCT----- mirR 20 23
-----CTGGGAGAAGGCTGTTTACTCTCT----- mirR 24 17
-----TGGGAGAAGGCTGTTTACTCTC----- mirR 22 7
-----GGAGAAGGCTGTTTACTC----- mirR 18 5
-----GGGAGAAGGCTGTTTACTCTC----- mirR 21 5
-----GGAGAAGGCTGTTTACTCTC----- mirR 20 4
-----TGGGAGAAGGCTGTTTACT----- mirR 19 3
-----GGAGAAGGCTGTTTACTCTCT----- mirR 21 2
-----TGGGAGAAGGCTGTTTACTC----- mirR 20 2
-----AAGCTGGGAGAAGGCTGTTT----- AAGCTGGGAGAAGGCTGTTT----- mirR 20 2
-----AAGCTGGGAGAAGGCTGTTTACTC----- mirR 24 1
-----AGCTGGGAGAAGGCTGTTTACTCT----- mirR 24 1
-----GGGAGAAGGCTGTTTACTC----- mirR 19 1
-----AAGCTGGGAGAAGGCTGTTTACT----- AAGCTGGGAGAAGGCTGTTTACT----- mirR 22 1
-----GCTGGGAGAAGGCTGTTT----- GCTGGGAGAAGGCTGTTT----- mirR 18 1
-----GGGAGAAGGCTGTTTACT----- GGGAGAAGGCTGTTTACT----- mirR 18 1
-----TCTCTCTGCCTTGAAAT-----TCTCTCTGCCTTGAAAT morR 18 1

>mmu-mir-30c-1
TGGGCTGTAACCATGTTGTAGTGTGTGTAACATCCTACACTCTCAGCTGTGAGCTCAAGGTGGCTGGGAGAGGGTTGTTTACTCCTTCTGCCATGGAAAACGTCAGC species len reads
----CTGTAACCATGTTGTAGTGTG----- morL 21 22
----TGTAACCATGTTGTAGTGTG----- morL 20 2
TGGGCTGTAACCATGTTGTAGTGTG----- morL 25 1
----CTGTAACCATGTTGTAGTGTG----- morL 22 1
-GGGCTGTAACCATGTTGTAGTGT----- morL 23 1
-GCTGTAACCATGTTGTAGTGTG----- morL 22 1
----TGTAACCATGTTGTAGTGT----- morL 19 1
-GGGCTGTAACCATGTTGTAGTGTG----- morL 26 1
-GGGCTGTAACCATGTTGTAGTGT----- morL 25 1
----AACCATGTTGTAGTGT----- morL 18 1
----CTGTAACCATGTTGTAGTGT----- morL 20 1
-----TGTAACATCCTACACTCTCAGCT----- mirL 24 196126
-----TGTAACATCCTACACTCTCAGC----- mirL 23 149723
-----TGTAACATCCTACACTCTC----- mirL 20 68574
-----TGTAACATCCTACACTCTCAGCTG----- mirL 25 29430
-----TGTAACATCCTACACTCTCA----- mirL 21 18843
-----TGTAACATCCTACACTCT----- mirL 19 13904
-----GTAACATCCTACACTCTCAGCT----- mirL 23 12240
-----TGTAACATCCTACACTCTCAG----- mirL 22 8686
-----GTAACATCCTACACTCTCAGC----- mirL 22 6083
-----GTAACATCCTACACTCTCAGCTG----- mirL 24 1916
-----GTAACATCCTACACTCTC----- mirL 19 1415
-----GTAACATCCTACACTCTCA----- mirL 20 942
-----GTAACATCCTACACTCT----- mirL 18 752
-----GTAACATCCTACACTCTCAG----- mirL 21 495
-----AAACATCCTACACTCTCAGC----- mirL 20 114

```

```

-----AAACATCCTTACACTCTCAGCT----- mirL 21 87
-----TAAACATCCTTACACTCTCAGCT----- mirL 22 85
-----TAAACATCCTTACACTCTCAGC----- mirL 21 47
-----GTGTAAACATCCTTACACTCTCAGCT----- mirL 25 37
-----GTGTAAACATCCTTACACTCTCAGC----- mirL 24 25
-----AAACATCCTTACACTCTCAGCTG----- mirL 22 23
-----AAACATCCTTACACTCTCA----- mirL 18 21
-----TAAACATCCTTACACTCTCA----- mirL 19 19
-----TAAACATCCTTACACTCTC----- mirL 18 17
-----TAAACATCCTTACACTCTCAGCTG----- mirL 23 10
-----TAAACATCCTTACACTCTCAG----- mirL 20 10
-----AAACATCCTTACACTCTCAG----- mirL 19 8
-----GTGTAAACATCCTTACACTCTC----- mirL 21 7
-----TGTGTAAACATCCTTACACTCTCAGCT----- mirL 26 5
-----GTGTGTAAACATCCTTACACTCTC----- mirL 23 3
-----GTGTAAACATCCTTACACTCT----- mirL 20 3
-----GTGTGTAAACATCCTTACACTCTCAGCT----- mirL 27 3
-----GTGTAAACATCCTTACACTC----- mirL 19 2
-----GTGTAAACATCCTTACACT----- mirL 18 2
-----TGTGTAAACATCCTTACACTCTC----- mirL 22 2
-----GTGTGTAAACATCCTTACACTCTCA----- mirL 24 1
-----AAACATCCTTACACTCTCAGCTGT----- mirL 23 1
-----TGTGTAAACATCCTTACACTCTCAG----- mirL 24 1
-----AAACATCCTTACACTCTCAGCTGTGA----- mirL 25 1
-----GTGTAAACATCCTTACACTCTCAGCTG----- mirL 26 1
-----TAAACATCCTTACACTCTCAGCTGT----- mirL 24 1
-----CTGTGAGCTCAAGGTGGCTG----- loop 20 1
-----GCTGTGAGCTCAAGGTGG----- loop 18 1
-----CTGGGAGAGGGTTGTTTACTCC----- mirR 22 102
-----CTGGGAGAGGGTTGTTTA----- mirR 18 40
-----CTGGGAGAGGGTTGTTTACT----- mirR 19 36
-----CTGGGAGAGGGTTGTTTACT----- mirR 20 30
-----CTGGGAGAGGGTTGTTTACTC----- mirR 21 24
-----CTGGGAGAGGGTTGTTTACTCCT----- mirR 23 23
-----TGGGAGAGGGTTGTTTACTCC----- mirR 21 9
-----GGGAGAGGGTTGTTTACTCC----- mirR 20 5
-----GGAGAGGGTTGTTTACTCC----- mirR 19 5
-----GGAGAGGGTTGTTTACTC----- mirR 18 4
-----TGGGAGAGGGTTGTTTACTCCT----- mirR 22 3
-----GGAGAGGGTTGTTTACTCCT----- mirR 20 3
-----CTGGGAGAGGGTTGTTTACTCCTT----- mirR 24 3
-----TGGGAGAGGGTTGTTTACT----- mirR 18 2
-----TGGGAGAGGGTTGTTTACT----- mirR 19 2
-----GGGAGAGGGTTGTTTACTC----- mirR 19 2
-----TGGGAGAGGGTTGTTTACTC----- mirR 20 2
-----TGGCTGGGAGAGGGTTGTTTA----- mirR 21 1

```

```

-----TGGCTGGGAGAGGGTTGTT----- mirR 19 1
-----GCTGGGAGAGGGTTGTTA----- mirR 19 1
-----GGCTGGGAGAGGGTTGTT----- mirR 19 1
-----GGAGAGGGTTGTTTACTCCTT----- mirR 21 1
-----TTCTGCCATGGAAAACGTCAGC morR 22 2
-----CTTCTGCCATGGAAAACGT---- morR 19 1
-----TCCTTCTGCCATGGAAAAC----- morR 19 1

```

>mmu-let-7f-2

| AGACAGACACTGGTGCTCTGTGGGATGAGGTAGTAGATTGTATAGTTTTAGGGTCATACCCCATCTTGGAGATAACTATACAGTCTACTGTCTTTCCACGGTGGTACACTTCCCATCC | species | len | reads  |
|------------------------------------------------------------------------------------------------------------------------|---------|-----|--------|
| -----ACACTGGTGCTCTGTGGGA-----                                                                                          | morL    | 19  | 4      |
| -----CACTGGTGCTCTGTGGGA-----                                                                                           | morL    | 18  | 3      |
| -----GACACTGGTGCTCTGTGGGA-----                                                                                         | morL    | 20  | 2      |
| -----CTGGTGCTCTGTGGGATG-----                                                                                           | morL    | 18  | 1      |
| AGACAGACACTGGTGCTCTGTG-----                                                                                            | morL    | 22  | 1      |
| -----GACACTGGTGCTCTGTGGGAT-----                                                                                        | morL    | 21  | 1      |
| -----ACACTGGTGCTCTGTGGG-----                                                                                           | morL    | 18  | 1      |
| -GACAGACACTGGTGCTCTGTG-----                                                                                            | morL    | 21  | 1      |
| -----CTGGTGCTCTGTGGGATGA-----                                                                                          | morL    | 19  | 1      |
| -----TGAGGTAGTAGATTGTATAGTT-----                                                                                       | mirL    | 22  | 228625 |
| -----TGAGGTAGTAGATTGTATAGTTT-----                                                                                      | mirL    | 23  | 71251  |
| -----TGAGGTAGTAGATTGTATAG-----                                                                                         | mirL    | 20  | 69907  |
| -----TGAGGTAGTAGATTGTATAGT-----                                                                                        | mirL    | 21  | 59483  |
| -----TGAGGTAGTAGATTGTATAGTTTT-----                                                                                     | mirL    | 24  | 26552  |
| -----TGAGGTAGTAGATTGTATA-----                                                                                          | mirL    | 19  | 18759  |
| -----TGAGGTAGTAGATTGTAT-----                                                                                           | mirL    | 18  | 8679   |
| -----GAGGTAGTAGATTGTATAGTT-----                                                                                        | mirL    | 21  | 3232   |
| -----GAGGTAGTAGATTGTATAGTTT-----                                                                                       | mirL    | 22  | 1080   |
| -----GAGGTAGTAGATTGTATAG-----                                                                                          | mirL    | 19  | 951    |
| -----GAGGTAGTAGATTGTATAGT-----                                                                                         | mirL    | 20  | 682    |
| -----GAGGTAGTAGATTGTATAGTTTT-----                                                                                      | mirL    | 23  | 451    |
| -----GAGGTAGTAGATTGTATA-----                                                                                           | mirL    | 18  | 134    |
| -----GGTAGTAGATTGTATAGTT-----                                                                                          | mirL    | 19  | 98     |
| -----AGGTAGTAGATTGTATAGTT-----                                                                                         | mirL    | 20  | 81     |
| -----ATGAGGTAGTAGATTGTATAGTT-----                                                                                      | mirL    | 23  | 55     |
| -----GAGGTAGTAGATTGTATAGTTTTA-----                                                                                     | mirL    | 24  | 43     |
| -----AGGTAGTAGATTGTATAG-----                                                                                           | mirL    | 18  | 36     |
| -----ATGAGGTAGTAGATTGTATAG-----                                                                                        | mirL    | 21  | 24     |
| -----GGTAGTAGATTGTATAGTTT-----                                                                                         | mirL    | 20  | 22     |
| -----ATGAGGTAGTAGATTGTATAGT-----                                                                                       | mirL    | 22  | 21     |
| -----AGGTAGTAGATTGTATAGTTT-----                                                                                        | mirL    | 21  | 21     |
| -----AGGTAGTAGATTGTATAGT-----                                                                                          | mirL    | 19  | 19     |
| -----GGTAGTAGATTGTATAGT-----                                                                                           | mirL    | 18  | 17     |
| -----ATGAGGTAGTAGATTGTATAGTTT-----                                                                                     | mirL    | 24  | 16     |
| -----ATGAGGTAGTAGATTGTATA-----                                                                                         | mirL    | 20  | 6      |
| -----GGTAGTAGATTGTATAGTTTT-----                                                                                        | mirL    | 21  | 5      |

C:\Documents and Settings\hong\Desktop\Hippocampus-total RNA.txt

```
-----AGGTAGTAGATTGTATAGTTTT----- mirL 22 5
-----ATGAGGTAGTAGATTGTAT----- mirL 19 4
-----ATGAGGTAGTAGATTGTA----- mirL 18 3
-----GATGAGGTAGTAGATTGTATAG----- mirL 22 2
-----GGATGAGGTAGTAGATTGTATAG----- mirL 23 2
-----AGGTAGTAGATTGTATAGTTTTA----- mirL 23 2
-----GATGAGGTAGTAGATTGTATAGT----- mirL 23 2
-----GGATGAGGTAGTAGATTGT----- mirL 19 2
-----GGTAGTAGATTGTATAGTTTTAG----- mirL 23 1
-----GATGAGGTAGTAGATTGTATAGTT----- mirL 24 1
-----GATGAGGTAGTAGATTGT----- mirL 18 1
-----GGTAGTAGATTGTATAGTTTTA----- mirL 22 1
-----GGATGAGGTAGTAGATTGTATAGTT----- mirL 25 1
-----TTAGGGTCATACCCCATCTTGGAGAT----- loop 26 1
-----CTATACAGTCTACTGTCTTTCC----- mirR 22 18248
-----CTATACAGTCTACTGTCTTTCC----- mirR 21 440
-----CTATACAGTCTACTGTCTTTCCC----- mirR 23 87
-----CTATACAGTCTACTGTCTTT----- mirR 20 87
-----TATACAGTCTACTGTCTTTCC----- mirR 21 40
-----CTATACAGTCTACTGTCTT----- mirR 19 34
-----CTATACAGTCTACTGTCT----- mirR 18 32
-----CTATACAGTCTACTGTCTTTCCCA----- mirR 24 11
-----ACTATACAGTCTACTGTCTTTCC----- mirR 23 9
-----AACTATACAGTCTACTGTCTTTCC----- mirR 23 5
-----ATACAGTCTACTGTCTTTCC----- mirR 20 5
-----TACAGTCTACTGTCTTTCC----- mirR 19 5
-----AACTATACAGTCTACTGTCTTTCC----- mirR 24 3
-----AACTATACAGTCTACTGTCTTT----- mirR 22 3
-----AACTATACAGTCTACTGTCT----- mirR 19 2
-----ATACAGTCTACTGTCTTTCC----- mirR 19 2
-----ACTATACAGTCTACTGTCTTTCC----- mirR 22 1
-----TACAGTCTACTGTCTTTCC----- mirR 18 1
-----ACTATACAGTCTACTGTCT----- mirR 18 1
-----TATACAGTCTACTGTCTTTCC----- mirR 20 1
-----AACTATACAGTCTACTGTCTT----- mirR 21 1
-----TAACTATACAGTCTACTGTCTTTCC----- mirR 24 1
-----TAACTATACAGTCTACTGT----- mirR 19 1
-----TAACTATACAGTCTACTGTCTTT----- mirR 23 1
-----TAACTATACAGTCTACTGTCT----- mirR 20 1
-----TAACTATACAGTCTACTG----- mirR 18 1
-----CCACGGTGGTACACTTCCC----- morR 19 5
-----TCCCACGGTGGTACACTT----- morR 18 1
-----CCACGGTGGTACACTTCCCATCC morR 23 1
```

>mmu-let-7f-1

AAAACCTTGCTCTATCAGAGTGAGGTAGTAGATTGTATAGTTGTGGGGTAGTGATTTTACCCTGTTTAGGAGATAACTATACAATCTATTGCCCTCCCTGAGGAGTAGACTTGCTGCA species len reads

|                                     |                |
|-------------------------------------|----------------|
| -AAACTTGCTCTATCAGAG-----            | morL 18 2      |
| AAAACCTTGCTCTATCAGAG-----           | morL 19 1      |
| -----TGAGGTAGTAGATTGTATAGTT-----    | mirL 22 228432 |
| -----TGAGGTAGTAGATTGTATAG-----      | mirL 20 69907  |
| -----TGAGGTAGTAGATTGTATAGT-----     | mirL 21 59483  |
| -----TGAGGTAGTAGATTGTATAGTTG-----   | mirL 23 59288  |
| -----TGAGGTAGTAGATTGTATAGTTGT-----  | mirL 24 23863  |
| -----TGAGGTAGTAGATTGTATA-----       | mirL 19 18767  |
| -----TGAGGTAGTAGATTGTAT-----        | mirL 18 8679   |
| -----GAGGTAGTAGATTGTATAGTT-----     | mirL 21 3232   |
| -----GAGGTAGTAGATTGTATAG-----       | mirL 19 951    |
| -----GAGGTAGTAGATTGTATAGTTG-----    | mirL 22 809    |
| -----GAGGTAGTAGATTGTATAGT-----      | mirL 20 682    |
| -----GAGGTAGTAGATTGTATAGTTGT-----   | mirL 23 412    |
| -----GAGGTAGTAGATTGTATA-----        | mirL 18 134    |
| -----GGTAGTAGATTGTATAGTT-----       | mirL 19 98     |
| -----AGGTAGTAGATTGTATAGTT-----      | mirL 20 81     |
| -----AGGTAGTAGATTGTATAGTTGT-----    | mirL 22 68     |
| -----GAGGTAGTAGATTGTATAGTTGTG-----  | mirL 24 38     |
| -----AGGTAGTAGATTGTATAG-----        | mirL 18 36     |
| -----GTGAGGTAGTAGATTGTATAGTT-----   | mirL 23 22     |
| -----AGGTAGTAGATTGTATAGT-----       | mirL 19 19     |
| -----AGGTAGTAGATTGTATAGTTG-----     | mirL 21 18     |
| -----GGTAGTAGATTGTATAGT-----        | mirL 18 17     |
| -----GGTAGTAGATTGTATAGTTG-----      | mirL 20 17     |
| -----GTGAGGTAGTAGATTGTATAG-----     | mirL 21 8      |
| -----AGTGAGGTAGTAGATTGTATAGTT-----  | mirL 24 5      |
| -----GGTAGTAGATTGTATAGTTGT-----     | mirL 21 5      |
| -----AGGTAGTAGATTGTATAGTTGTG-----   | mirL 23 5      |
| -----GTGAGGTAGTAGATTGTATAGTTG-----  | mirL 24 4      |
| -----GTGAGGTAGTAGATTGTATAGT-----    | mirL 22 4      |
| -----AGTGAGGTAGTAGATTGTATAG-----    | mirL 22 4      |
| -----GTGAGGTAGTAGATTGTATAGTTGT----- | mirL 25 3      |
| -----GTGAGGTAGTAGATTGTAT-----       | mirL 19 3      |
| -----GTGAGGTAGTAGATTGTATA-----      | mirL 20 3      |
| -----GGTAGTAGATTGTATAGTTGTGG-----   | mirL 23 1      |
| -----GAGTGAGGTAGTAGATTGTATAGT-----  | mirL 24 1      |
| -----AGTGAGGTAGTAGATTGT-----        | mirL 18 1      |
| -----GAGTGAGGTAGTAGATTGTATAG-----   | mirL 23 1      |
| -----GGTAGTAGATTGTATAGTTGTG-----    | mirL 22 1      |
| -----GAGTGAGGTAGTAGATTGTATAGTT----- | mirL 25 1      |
| -----AGTGAGGTAGTAGATTGTATAGTTG----- | mirL 25 1      |
| -----AGTGAGGTAGTAGATTGTATAGT-----   | mirL 23 1      |
| -----CTATACAATCTATTGCCTTCCC-----    | mirR 22 3289   |
| -----CTATACAATCTATTGCCTTCC-----     | mirR 21 1077   |
| -----CTATACAATCTATTGCCTTC-----      | mirR 20 488    |

```

-----ATACAATCTATTGCCTTCCC----- mirR 20 214
-----TACAATCTATTGCCTTCCC----- mirR 19 192
-----AACTATACAATCTATTGCCTTC----- mirR 22 185
-----CTATACAATCTATTGCCTTCCCT----- mirR 23 171
-----TATACAATCTATTGCCTTCCC----- mirR 21 99
-----CTATACAATCTATTGCCTT----- mirR 19 91
-----CTATACAATCTATTGCCT----- mirR 18 79
-----TACAATCTATTGCCTTCC----- mirR 18 76
-----ATACAATCTATTGCCTTCC----- mirR 19 71
-----ACTATACAATCTATTGCCTTCC----- mirR 22 65
-----CTATACAATCTATTGCCTTCCCTG----- mirR 24 58
-----AACTATACAATCTATTGCCTTCC----- mirR 23 41
-----TATACAATCTATTGCCTTCC----- mirR 20 35
-----ATACAATCTATTGCCTTC----- mirR 18 29
-----AACTATACAATCTATTGCCTT----- mirR 21 23
-----ACTATACAATCTATTGCCTTCCC----- mirR 23 15
-----ACTATACAATCTATTGCCTTC----- mirR 21 14
-----ATACAATCTATTGCCTTCCCT----- mirR 21 9
-----AACTATACAATCTATTGCC----- mirR 19 8
-----TATACAATCTATTGCCTTCCCT----- mirR 22 8
-----TATACAATCTATTGCCTT----- mirR 18 8
-----TATACAATCTATTGCCTTC----- mirR 19 8
-----TACAATCTATTGCCTTCCCT----- mirR 20 5
-----AACTATACAATCTATTGC----- mirR 18 4
-----TATACAATCTATTGCCTTCCCTG----- mirR 23 3
-----ACTATACAATCTATTGCCTT----- mirR 20 2
-----ATACAATCTATTGCCTTCCCTG----- mirR 22 1
-----AACTATACAATCTATTGCCTTCCCTGA----- mirR 27 1
-----TAACTATACAATCTATTGCCTTC----- mirR 23 1
-----ACTATACAATCTATTGCC----- mirR 18 1
-----CTGAGGAGTAGACTTGCT--- morR 18 1
-----AGGAGTAGACTTGCTGCA morR 18 1

```

>mmu-mir-126

```

CGCATCTTTGCCGGTGACAGCACATTATTACTTTTGGTACGCGCTGTGACACTTCAAACCTCGTACCGTGAGTAATAATGCGCGGTCAGCAGCCCAGCGCCAGGAATG species len reads
---ATCTTTGCCGGTGACAGCA----- morL 19 15
---TCTTTGCCGGTGACAGCA----- morL 18 11
---ATCTTTGCCGGTGACAGCAC----- morL 20 9
---TCTTTGCCGGTGACAGCAC----- morL 19 5
---CATCTTTGCCGGTGACAGCA----- morL 20 2
---CATCTTTGCCGGTGACAGC----- morL 19 1
CGCATCTTTGCCGGTGACAGCA----- morL 22 1
---ATCTTTGCCGGTGACAGC----- morL 18 1
---CTTTGCCGGTGACAGCACA----- morL 19 1
---CTTTGCCGGTGACAGCAC----- morL 18 1
CGCATCTTTGCCGGTGACAGCAC----- morL 23 1

```



```

--CATCTTTGCCGGTGACAG----- morL 18 1
-GCATCTTTGCCGGTGACAGCA----- morL 21 1
-----CATTATTACTTTTGGTACGCGC----- mirL 22 63119
-----CATTATTACTTTTGGTACGCG----- mirL 21 35345
-----CATTATTACTTTTGGTACGCGCT----- mirL 23 30984
-----CATTATTACTTTTGGTACGCG----- mirL 20 18260
-----CATTATTACTTTTGGTACG----- mirL 19 15180
-----CATTATTACTTTTGGTAC----- mirL 18 8185
-----CATTATTACTTTTGGTACGCGCTG----- mirL 24 511
-----ATTATTACTTTTGGTACGCG----- mirL 20 88
-----ATTATTACTTTTGGTACGCGC----- mirL 21 46
-----ATTATTACTTTTGGTACGCG----- mirL 19 37
-----ACATTATTACTTTTGGTACGCG----- mirL 21 32
-----ACATTATTACTTTTGGTACGCGC----- mirL 23 30
-----ATTATTACTTTTGGTACGCGCT----- mirL 22 30
-----ACATTATTACTTTTGGTACGCG----- mirL 22 18
-----TATTACTTTTGGTACGCGC----- mirL 19 16
-----ATTATTACTTTTGGTACG----- mirL 18 15
-----ACATTATTACTTTTGGTACG----- mirL 20 14
-----ACATTATTACTTTTGGTACGCGCT----- mirL 24 13
-----TTATTACTTTTGGTACGCGCT----- mirL 21 13
-----TATTACTTTTGGTACGCG----- mirL 18 9
-----TTATTACTTTTGGTACGCG----- mirL 19 7
-----ACATTATTACTTTTGGTAC----- mirL 19 6
-----TTATTACTTTTGGTACGCG----- mirL 18 6
-----TTATTACTTTTGGTACGCGC----- mirL 20 6
-----ACATTATTACTTTTGGTA----- mirL 18 3
-----TATTACTTTTGGTACGCGCT----- mirL 20 3
-----CACATTATTACTTTTGGTACG----- mirL 21 2
-----CACATTATTACTTTTGGTACGCG----- mirL 23 2
-----CACATTATTACTTTTGGTACGCGC----- mirL 24 1
-----TTATTACTTTTGGTACGCGCTGTGAC----- mirL 26 1
-----GCACATTATTACTTTTGG----- mirL 18 1
-----CACATTATTACTTTTGGTAC----- mirL 20 1
-----GCACATTATTACTTTTGGTACGCGC----- mirL 25 1
-----TTATTACTTTTGGTACGCGCTGTG----- mirL 24 1
-----CGCTGTGACACTTCAAAC----- loop 18 1
-----CTGTGACACTTCAAATC----- loop 18 1
-----GCTGTGACACTTCAAATC----- loop 18 1
-----CGTACCGTGAGTAATAATGCGC----- mirR 22 99574
-----TCGTACCGTGAGTAATAATGCGC----- mirR 23 64496
-----CGTACCGTGAGTAATAATGC----- mirR 20 27380
-----TCGTACCGTGAGTAATAATGC----- mirR 21 26793
-----CGTACCGTGAGTAATAATGCG----- mirR 21 20077
-----TCGTACCGTGAGTAATAATGCG----- mirR 22 18796
-----CGTACCGTGAGTAATAATGCGCG----- mirR 23 12985

```

```

-----TCGTACCGTGAGTAATAATGCGCG----- mirR 24 8555
-----CGTACCGTGAGTAATAATG----- mirR 19 6076
-----TCGTACCGTGAGTAATAATG----- mirR 20 5866
-----TCGTACCGTGAGTAATAA----- mirR 18 4361
-----TCGTACCGTGAGTAATAAT----- mirR 19 4164
-----CGTACCGTGAGTAATAAT----- mirR 18 2892
-----CTCGTACCGTGAGTAATAATGC----- mirR 22 1988
-----CGTACCGTGAGTAATAATGCGCG----- mirR 24 1191
-----CTCGTACCGTGAGTAATAATGCG----- mirR 23 206
-----CTCGTACCGTGAGTAATAAT----- mirR 20 188
-----GTACCGTGAGTAATAATGCGC----- mirR 21 176
-----CTCGTACCGTGAGTAATAATG----- mirR 21 170
-----CTCGTACCGTGAGTAATAATGCGC----- mirR 24 131
-----GTACCGTGAGTAATAATGC----- mirR 19 115
-----CTCGTACCGTGAGTAATAA----- mirR 19 95
-----TACCGTGAGTAATAATGC----- mirR 18 81
-----TACCGTGAGTAATAATGCGC----- mirR 20 47
-----GTACCGTGAGTAATAATGCGCG----- mirR 22 45
-----ACCGTGAGTAATAATGCGC----- mirR 19 37
-----CTCGTACCGTGAGTAATA----- mirR 18 31
-----GTACCGTGAGTAATAATGCG----- mirR 20 30
-----ACCGTGAGTAATAATGCG----- mirR 18 23
-----GTACCGTGAGTAATAATG----- mirR 18 21
-----GTACCGTGAGTAATAATGCGCG----- mirR 23 18
-----TACCGTGAGTAATAATGCG----- mirR 19 12
-----TACCGTGAGTAATAATGCGCG----- mirR 21 9
-----TACCGTGAGTAATAATGCGCG----- mirR 22 5
-----ACCGTGAGTAATAATGCGCG----- mirR 20 4
-----ACTCGTACCGTGAGTAATAATGC----- mirR 23 4
-----ACTCGTACCGTGAGTAATAATGCGC----- mirR 25 2
-----ACCGTGAGTAATAATGCGCG----- mirR 21 1
-----GTACCGTGAGTAATAATGCGCGGT----- mirR 24 1
-----ACTCGTACCGTGAGTAATAAT----- mirR 21 1
-----ACTCGTACCGTGAGTAATAATGCG----- mirR 24 1
-----CGGTCAGCAGCCCAGCGCCAG----- morR 21 6
-----CGGTCAGCAGCCCAGCGC----- morR 18 5
-----CGGTCAGCAGCCCAGCGCC----- morR 19 5
-----CGGTCAGCAGCCCAGCGCCA----- morR 20 2
-----CGGTCAGCAGCCCAGCGCCAGGAATG morR 26 1
-----GCGGTCAGCAGCCCAGCGCC----- morR 20 1
-----CGGTCAGCAGCCCAGCGCCAGGA--- morR 23 1

```

>mmu-mir-145

```

TCTCTCTCCACCTTGTCTCCTCACGGTCCAGTTTCCAGGAATCCCTTGGATGCTAAGATGGGGATTCTTGAAATACTGTTCTTGAGGTCATGGCTTAGCAGCTGG species len reads
-----CTCCACCTTGTCTCCTCACG----- morL 19 3
-----TCCACCTTGTCTCCTCACGG----- morL 19 2

```

```

-----TCTCCCACCTTGTCCCTCA----- morL 18 2
-----CACCTTGTCCCTCACGGTC----- morL 18 2
-----TCCCACCTTGTCCCTCACG----- morL 18 2
-----TCTCCCACCTTGTCCCTCACGG----- morL 21 1
TCTCTCTCCCACCTTGTCCCTC----- morL 21 1
---CTCTCCCACCTTGTCCCTC----- morL 18 1
--TCTCTCCCACCTTGTCCCTCACG----- morL 22 1
-----GTCCAGTTTTCCCAGGAATCCC----- mirL 22 181860
-----GTCCAGTTTTCCCAGGAATCCCT----- mirL 23 116786
-----GTCCAGTTTTCCCAGGAATCCCTT----- mirL 24 57610
-----GTCCAGTTTTCCCAGGAATCC----- mirL 21 56731
-----GTCCAGTTTTCCCAGGAATC----- mirL 20 18774
-----GTCCAGTTTTCCCAGGAAT----- mirL 19 13525
-----GTCCAGTTTTCCCAGGAATCCCTTG----- mirL 25 11196
-----TCCAGTTTTCCCAGGAATCCCT----- mirL 22 269
-----TCCAGTTTTCCCAGGAATCCC----- mirL 21 220
-----TCCAGTTTTCCCAGGAATCC----- mirL 20 146
-----CCAGTTTTCCCAGGAATCCCT----- mirL 21 137
-----TCCAGTTTTCCCAGGAATCCCTT----- mirL 23 130
-----GGTCCAGTTTTCCCAGGAATCCC----- mirL 23 109
-----CAGTTTTCCCAGGAATCCCTT----- mirL 21 89
-----CAGTTTTCCCAGGAATCCCT----- mirL 20 84
-----CCAGTTTTCCCAGGAATCCC----- mirL 20 48
-----CCAGTTTTCCCAGGAATCCCTT----- mirL 22 44
-----CCAGTTTTCCCAGGAATCC----- mirL 19 39
-----GGTCCAGTTTTCCCAGGAATCCCT----- mirL 24 38
-----GGTCCAGTTTTCCCAGGAATCCCTT----- mirL 25 37
-----TCCAGTTTTCCCAGGAATCCCTTG----- mirL 24 34
-----CGGTCCAGTTTTCCCAGGAATCCC----- mirL 24 34
-----TCCAGTTTTCCCAGGAAT----- mirL 18 32
-----TCCAGTTTTCCCAGGAATC----- mirL 19 28
-----GGTCCAGTTTTCCCAGGAATCC----- mirL 22 27
-----CAGTTTTCCCAGGAATCCC----- mirL 19 15
-----CAGTTTTCCCAGGAATCC----- mirL 18 12
-----GGTCCAGTTTTCCCAGGAATC----- mirL 21 11
-----CAGTTTTCCCAGGAATCCCTTG----- mirL 22 11
-----CGGTCCAGTTTTCCCAGGAATCCCT----- mirL 25 10
-----CCAGTTTTCCCAGGAATCCCTTG----- mirL 23 8
-----GGTCCAGTTTTCCCAGGAAT----- mirL 20 7
-----CGGTCCAGTTTTCCCAGGAATCCCTT----- mirL 26 7
-----CGGTCCAGTTTTCCCAGGAATCC----- mirL 23 6
-----CCAGTTTTCCCAGGAATC----- mirL 18 4
-----GGTCCAGTTTTCCCAGGAA----- mirL 19 4
-----CGGTCCAGTTTTCCCAGGAAT----- mirL 21 2
-----CCAGTTTTCCCAGGAATCCCTTGG----- mirL 24 1
-----ACGGTCCAGTTTTCCCAG----- mirL 18 1

```

```

-----CGGTCCAGTTTTCCAGGAATCCCTTG----- mirL 27 1
-----CAGTTTTCCAGGAATCCCTTG----- mirL 23 1
-----CTTGGATGCTAAGATGGG----- loop 18 1
-----CCTTGGATGCTAAGATGGG----- loop 19 1
-----GGATTCCTGGAAATACTGTTCT----- mirR 22 428
-----GGATTCCTGGAAATACTGTTCT----- mirR 21 362
-----ATTCCTGGAAATACTGTTCTTG----- mirR 22 260
-----ATTCCTGGAAATACTGTTCTT----- mirR 21 155
-----GATTCCTGGAAATACTGTTCTT----- mirR 22 100
-----GGATTCCTGGAAATACTGTTCTT----- mirR 23 88
-----GGATTCCTGGAAATACTGTT----- mirR 20 82
-----GATTCCTGGAAATACTGTTCT----- mirR 21 69
-----ATTCCTGGAAATACTGTTCT----- mirR 19 62
-----GGATTCCTGGAAATACTGTT----- mirR 19 51
-----GATTCCTGGAAATACTGTTCT----- mirR 20 39
-----ATTCCTGGAAATACTGTTCT----- mirR 20 39
-----ATTCCTGGAAATACTGTT----- mirR 18 34
-----ATTCCTGGAAATACTGTTCTTGA----- mirR 23 23
-----GATTCCTGGAAATACTGTTCTTG----- mirR 23 14
-----TTCCTGGAAATACTGTTCT----- mirR 19 10
-----GGATTCCTGGAAATACTGTTCTTG----- mirR 24 10
-----GGATTCCTGGAAATACTGTT----- mirR 18 8
-----TTCCTGGAAATACTGTTCT----- mirR 18 5
-----TTCCTGGAAATACTGTTCTT----- mirR 20 5
-----ATTCCTGGAAATACTGTTCTTGAG----- mirR 24 4
-----TTCCTGGAAATACTGTTCTTG----- mirR 21 4
-----GATTCCTGGAAATACTGTT----- mirR 18 4
-----GATTCCTGGAAATACTGTT----- mirR 19 4
-----GATTCCTGGAAATACTGTTCTTGAG----- mirR 26 1
-----TGAGGTCATGGCTTAGCAGCTGG morR 23 2

```

>mmu-let-7b

```

CCAGAACACGGACACCGCAGGGTAGGTTAGTTGTGTGGTTTCAGGGCAGTGATGTTGCCCTCCGAAGATAACTATACAACCTACTGCCTTCCCTGAGGCGCCAGGGACACAG species len reads
----AACACGGACACCGCAGGG----- morL 18 5
----ACACGGACACCGCAGGGT----- morL 18 4
----GAACACGGACACCGCAGGG----- morL 19 4
----AACACGGACACCGCAGGGT----- morL 19 3
-CAGAACACGGACACCGCAGGG----- morL 21 2
--AGAACACGGACACCGCAGGG----- morL 20 2
--AACACGGACACCGCAGGGTGA----- morL 21 2
CCAGAACACGGACACCGCAGGG----- morL 22 1
CCAGAACACGGACACCGCAGGGT----- morL 23 1
----AACACGGACACCGCAGGGT----- morL 20 1
-CAGAACACGGACACCGCAG----- morL 19 1
-----TGAGGTAGTAGGTTGTGTGGTT----- mirL 22 138128
-----TGAGGTAGTAGGTTGTGTGG----- mirL 20 82418

```

|                                            |               |
|--------------------------------------------|---------------|
| -----TGAGGTAGTAGGTTGTGTGGTTT-----          | mirL 23 67131 |
| -----TGAGGTAGTAGGTTGTGTGGTTTC-----         | mirL 24 47876 |
| -----TGAGGTAGTAGGTTGTGTGGT-----            | mirL 21 41074 |
| -----TGAGGTAGTAGGTTGTGTG-----              | mirL 19 15334 |
| -----TGAGGTAGTAGGTTGTGT-----               | mirL 18 10857 |
| -----GAGGTAGTAGGTTGTGTGGTT-----            | mirL 21 3380  |
| -----GAGGTAGTAGGTTGTGTGGTTT-----           | mirL 22 1708  |
| -----GAGGTAGTAGGTTGTGTGG-----              | mirL 19 1616  |
| -----GAGGTAGTAGGTTGTGTGGTTTC-----          | mirL 23 1168  |
| -----GAGGTAGTAGGTTGTGTGGT-----             | mirL 20 763   |
| -----GAGGTAGTAGGTTGTGTG-----               | mirL 18 230   |
| -----GAGGTAGTAGGTTGTGTGGTTTCA-----         | mirL 24 173   |
| -----GGTAGTAGGTTGTGTGGTT-----              | mirL 19 47    |
| -----AGGTAGTAGGTTGTGTGGTT-----             | mirL 20 43    |
| -----GTGAGGTAGTAGGTTGTGTGGTT-----          | mirL 23 35    |
| -----AGGTAGTAGGTTGTGTGGTTT-----            | mirL 21 25    |
| -----GTGAGGTAGTAGGTTGTGTGG-----            | mirL 21 19    |
| -----GGTAGTAGGTTGTGTGGTTT-----             | mirL 20 17    |
| -----AGGTAGTAGGTTGTGTGG-----               | mirL 18 15    |
| -----AGGTAGTAGGTTGTGTGGT-----              | mirL 19 12    |
| -----GGTAGTAGGTTGTGTGGTTTC-----            | mirL 21 10    |
| -----GTGAGGTAGTAGGTTGTGTGGT-----           | mirL 22 9     |
| -----GGTAGTAGGTTGTGTGGT-----               | mirL 18 9     |
| -----GTGAGGTAGTAGGTTGTGTGGTTT-----         | mirL 24 7     |
| -----GTGAGGTAGTAGGTTGTGTGGTTTC-----        | mirL 25 7     |
| -----AGGTAGTAGGTTGTGTGGTTTC-----           | mirL 22 7     |
| -----AGGTAGTAGGTTGTGTGGTTTCA-----          | mirL 23 3     |
| -----GGGTGAGGTAGTAGGTTGTGTGG-----          | mirL 23 2     |
| -----GTGAGGTAGTAGGTTGTGTG-----             | mirL 20 2     |
| -----GGGTGAGGTAGTAGGTTGTGTG-----           | mirL 22 2     |
| -----GGGTGAGGTAGTAGGTTGTGTGGTTT-----       | mirL 26 2     |
| -----GGTGAGGTAGTAGGTTGTGTGGTT-----         | mirL 24 1     |
| -----AGGTAGTAGGTTGTGTGGTTTCAG-----         | mirL 24 1     |
| -----GGTGAGGTAGTAGGTTGTGTGGTTT-----        | mirL 25 1     |
| -----TCAGGGCAGTGATGTTGCCCTCCGAAGAT-----    | loop 30 43    |
| -----TCAGGGCAGTGATGTTGCCCTCCGAAGA-----     | loop 29 29    |
| -----TCAGGGCAGTGATGTTGCCCTCCGAAGATAAC----- | loop 33 7     |
| -----TCAGGGCAGTGATGTTGCCCTCCGAAGATA-----   | loop 31 3     |
| -----CAGGGCAGTGATGTTGCCCTCCGAAGAT-----     | loop 29 3     |
| -----CAGGGCAGTGATGTTGCCCTCCGAAGATAA-----   | loop 31 2     |
| -----CAGGGCAGTGATGTTGCCCTCCGAAGA-----      | loop 28 1     |
| -----CTATACAACCTACTGCCTTCCC-----           | mirR 22 6392  |
| -----CTATACAACCTACTGCCTTCC-----            | mirR 21 1817  |
| -----CTATACAACCTACTGCCTTCCCT-----          | mirR 23 747   |
| -----CTATACAACCTACTGCCTTC-----             | mirR 20 721   |
| -----CTATACAACCTACTGCCT-----               | mirR 18 127   |

```

-----CTATACAACCTACTGCCTT----- mirR 19 117
-----CTATACAACCTACTGCCTTCCCTG----- mirR 24 104
-----TATACAACCTACTGCCTTCCC----- mirR 21 70
-----ATACAACCTACTGCCTTCCC----- mirR 20 65
-----TACAACCTACTGCCTTCCC----- mirR 19 31
-----TATACAACCTACTGCCTTCC----- mirR 20 14
-----ATACAACCTACTGCCTTC----- mirR 18 13
-----ATACAACCTACTGCCTTCC----- mirR 19 11
-----TATACAACCTACTGCCTTC----- mirR 19 8
-----TACAACCTACTGCCTTCC----- mirR 18 8
-----TATACAACCTACTGCCTTCCCT----- mirR 22 8
-----AACTATACAACCTACTGCCTTC----- mirR 22 7
-----AACTATACAACCTACTGCCTTCC----- mirR 23 7
-----ACTATACAACCTACTGCCTTCCC----- mirR 23 7
-----ATACAACCTACTGCCTTCCCT----- mirR 21 5
-----TAACTATACAACCTACTGCCTTC----- mirR 23 4
-----TACAACCTACTGCCTTCCCT----- mirR 20 3
-----TATACAACCTACTGCCTTCCCTG----- mirR 23 2
-----AACTATACAACCTACTGCCTTCCCT----- mirR 25 2
-----ATACAACCTACTGCCTTCCCTG----- mirR 22 2
-----TAACTATACAACCTACTGCCT----- mirR 21 1
-----TATACAACCTACTGCCTT----- mirR 18 1
-----ACTATACAACCTACTGCCTT----- mirR 20 1
-----ACTATACAACCTACTGCCTTC----- mirR 21 1
-----AACTATACAACCTACTGCCTT----- mirR 21 1
-----TAACTATACAACCTACTGCCTTCCC----- mirR 25 1
-----ACTATACAACCTACTGCCTTCC----- mirR 22 1
-----TGAGGCGCCCAGGGACAC-- morR 18 1
-----CTGAGGCGCCCAGGGACACAG morR 21 1
-----CCCTGAGGCGCCCAGGGA----- morR 18 1

```

>mmu-mir-23b

```

TGCCCTCACCTGCTCTGGCTGCTTGGGTTCTGGCATGCTGATTGTGACTTGAGATTAATAACATTCAGGATTACCACGCAACCATGACCTTG species len reads
----CTCACCTGCTCTGGCTGCTT----- morL 20 3
---CCTCACCTGCTCTGGCTG----- morL 18 2
---CACCTGCTCTGGCTGCTT----- morL 18 2
--CCCTCACCTGCTCTGGCT----- morL 18 1
TGCCCTCACCTGCTCTGGCT----- morL 20 1
-GCCCTCACCTGCTCTGGCTG----- morL 20 1
TGCCCTCACCTGCTCTGGCTG----- morL 21 1
---CTCACCTGCTCTGGCTGC----- morL 18 1
TGCCCTCACCTGCTCTGGCTGCTT----- morL 24 1
-----TGGGTTCTGGCATGCTGATT----- mirL 22 375
-----TGGGTTCTGGCATGCTGATT----- mirL 21 181
-----GGGTTCTGGCATGCTGATT----- mirL 21 81
-----TGGGTTCTGGCATGCTG----- mirL 18 78

```

```

-----TGGGTTCTGGCATGCTGAT----- mirL 20 77
-----GGGTTCTGGCATGCTGATT----- mirL 20 61
-----TGGGTTCTGGCATGCTGATTTG----- mirL 23 52
-----TGGGTTCTGGCATGCTGA----- mirL 19 28
-----GGGTTCTGGCATGCTGATTTG----- mirL 22 24
-----GGTTCCTGGCATGCTGATTT----- mirL 20 22
-----GTTCTGGCATGCTGATTT----- mirL 19 19
-----GTTCTGGCATGCTGATT----- mirL 18 11
-----GGGTTCTGGCATGCTGAT----- mirL 19 10
-----GGTTCCTGGCATGCTGATT----- mirL 19 8
-----GGTTCCTGGCATGCTGAT----- mirL 18 8
-----GTTCTGGCATGCTGATTTG----- mirL 20 3
-----GGGTTCTGGCATGCTGATTTGT----- mirL 23 3
-----TGGGTTCTGGCATGCTGATTTGT----- mirL 24 2
-----GGGTTCTGGCATGCTGA----- mirL 18 2
-----GGTTCCTGGCATGCTGATTTG----- mirL 21 1
-----ATCACATTGCCAGGGATTACCAC----- mirR 23 136154
-----ATCACATTGCCAGGGATTACC----- mirR 21 62912
-----ATCACATTGCCAGGGATTAC----- mirR 20 60413
-----ATCACATTGCCAGGGATTACCA----- mirR 22 48902
-----ATCACATTGCCAGGGATTACCACG----- mirR 24 42837
-----ATCACATTGCCAGGGATTA----- mirR 19 11490
-----ATCACATTGCCAGGGATTACCACGC----- mirR 25 9162
-----TCACATTGCCAGGGATTACCAC----- mirR 22 5334
-----TCACATTGCCAGGGATTACCACG----- mirR 23 2460
-----TCACATTGCCAGGGATTACCA----- mirR 21 1440
-----TCACATTGCCAGGGATTAC----- mirR 19 1430
-----TCACATTGCCAGGGATTACC----- mirR 20 1244
-----TCACATTGCCAGGGATTACCACGC----- mirR 24 875
-----AATCACATTGCCAGGGATTACC----- mirR 22 627
-----ACATTGCCAGGGATTACCAC----- mirR 20 430
-----ACATTGCCAGGGATTACCACG----- mirR 21 360
-----AATCACATTGCCAGGGATTACCAC----- mirR 24 349
-----ACATTGCCAGGGATTACCA----- mirR 19 263
-----AATCACATTGCCAGGGATTACCA----- mirR 23 221
-----CACATTGCCAGGGATTACCAC----- mirR 21 207
-----AATCACATTGCCAGGGATTAC----- mirR 21 202
-----ACATTGCCAGGGATTACC----- mirR 18 186
-----CACATTGCCAGGGATTACCACG----- mirR 22 172
-----TCACATTGCCAGGGATTA----- mirR 18 154
-----CACATTGCCAGGGATTACC----- mirR 19 103
-----CACATTGCCAGGGATTACCA----- mirR 20 101
-----CACATTGCCAGGGATTAC----- mirR 18 95
-----ACATTGCCAGGGATTACCACGC----- mirR 22 92
-----AATCACATTGCCAGGGATTA----- mirR 20 85
-----CACATTGCCAGGGATTACCACGC----- mirR 23 52

```

```

-----AATCACATTGCCAGGGATTACCACG----- mirR 25 49
-----CACATTGCCAGGGATTACCACGCA----- mirR 24 10
-----AATCACATTGCCAGGGATTACCACGC----- mirR 26 9
-----ACATTGCCAGGGATTACCACGCA----- mirR 23 6
-----AAATCACATTGCCAGGGATTACC----- mirR 23 5
-----AAATCACATTGCCAGGGATTACCACG----- mirR 26 3
-----AAATCACATTGCCAGGGATTACCA----- mirR 24 3
-----AAATCACATTGCCAGGGATTACCAC----- mirR 25 2
-----AAATCACATTGCCAGGGATTAC----- mirR 22 2
-----AAAATCACATTGCCAGGGATTACC----- mirR 24 1
-----CACGCAACCATGACCTTG morR 18 1

```

>mmu-let-7c-1

| Species | len | reads  |
|---------|-----|--------|
| morL    | 19  | 1      |
| morL    | 21  | 1      |
| morL    | 21  | 1      |
| mirL    | 22  | 157224 |
| mirL    | 23  | 73999  |
| mirL    | 21  | 56211  |
| mirL    | 20  | 36977  |
| mirL    | 24  | 14903  |
| mirL    | 19  | 10389  |
| mirL    | 21  | 3845   |
| mirL    | 25  | 2621   |
| mirL    | 22  | 2442   |
| mirL    | 20  | 922    |
| mirL    | 19  | 727    |
| mirL    | 23  | 548    |
| mirL    | 18  | 156    |
| mirL    | 22  | 147    |
| mirL    | 24  | 110    |
| mirL    | 23  | 101    |
| mirL    | 21  | 96     |
| mirL    | 20  | 56     |
| mirL    | 24  | 48     |
| mirL    | 19  | 38     |
| mirL    | 23  | 34     |
| mirL    | 21  | 27     |
| mirL    | 20  | 27     |
| mirL    | 24  | 25     |
| mirL    | 25  | 25     |
| mirL    | 18  | 17     |
| mirL    | 20  | 13     |
| mirL    | 19  | 12     |
| mirL    | 18  | 10     |



```

-----GTTGAGGTAGTAGGTTGTATGG----- mirL 22 7
-----GTTGAGGTAGTAGGTTGTATG----- mirL 21 6
-----AGGTAGTAGGTTGTATGGTTTA----- mirL 22 4
-----GTTGAGGTAGTAGGTTGTATGGTTT----- mirL 25 4
-----GGTTGAGGTAGTAGGTTGTATGGTT----- mirL 25 4
-----GGTTGAGGTAGTAGGTTGTATGGTT----- mirL 26 3
-----TTGAGGTAGTAGGTTGTATGGTTTAG----- mirL 26 3
-----GGTAGTAGGTTGTATGGTTTAG----- mirL 22 3
-----GTTGAGGTAGTAGGTTGTATGGTTTA----- mirL 26 3
-----GGTAGTAGGTTGTATGGTTTA----- mirL 21 3
-----GGTAGTAGGTTGTATGGTTTAGA----- mirL 23 2
-----GGTAGTAGGTTGTATGGTTTAGAG----- mirL 24 1
-----GGTTGAGGTAGTAGGTTGTATGGT----- mirL 24 1
-----TAGAGTTACACCCTGGGAGTTA----- loop 22 362
-----TAGAGTTACACCCTGGGAGTTAA----- loop 23 85
-----TAGAGTTACACCCTGGGAGTT----- loop 21 79
-----TAGAGTTACACCCTGGGAGT----- loop 20 58
-----AGAGTTACACCCTGGGAGTTA----- loop 21 44
-----GAGTTACACCCTGGGAGTTA----- loop 20 30
-----TAGAGTTACACCCTGGGAGTTAAC----- loop 24 23
-----AGAGTTACACCCTGGGAGTT----- loop 20 15
-----AGTTACACCCTGGGAGTTA----- loop 19 14
-----AGAGTTACACCCTGGGAGT----- loop 19 9
-----AGTTACACCCTGGGAGTT----- loop 18 8
-----AGAGTTACACCCTGGGAGTTAA----- loop 22 4
-----GAGTTACACCCTGGGAGT----- loop 18 3
-----GAGTTACACCCTGGGAGTT----- loop 19 3
-----TTAGAGTTACACCCTGGGAGTTA----- loop 23 2
-----TAGAGTTACACCCTGGGAGTTAACT----- loop 25 2
-----GAGTTACACCCTGGGAGTTAA----- loop 21 2
-----AGTTACACCCTGGGAGTTAA----- loop 20 1
-----AGAGTTACACCCTGGGAGTTAAC----- loop 23 1
-----CTGTACAACCTTCTAGCTTTCC----- mirR 22 4049
-----CTGTACAACCTTCTAGCTTTCC----- mirR 21 1176
-----CTGTACAACCTTCTAGCTTT----- mirR 20 285
-----CTGTACAACCTTCTAGCTTTCCCT----- mirR 23 128
-----TGTACAACCTTCTAGCTTTCC----- mirR 21 118
-----CTGTACAACCTTCTAGCT----- mirR 18 104
-----CTGTACAACCTTCTAGCTT----- mirR 19 97
-----GTACAACCTTCTAGCTTTCC----- mirR 20 86
-----TACAACCTTCTAGCTTTCC----- mirR 19 75
-----TGTACAACCTTCTAGCTTTCC----- mirR 20 26
-----TGTACAACCTTCTAGCTTTCCCT----- mirR 22 26
-----GTACAACCTTCTAGCTTTCC----- mirR 19 24
-----TACAACCTTCTAGCTTTCC----- mirR 18 18
-----ACTGTACAACCTTCTAGCTTTCC----- mirR 23 6

```

```

-----AACTGTACAACCTTCTAGCTTTC----- mirR 23 5
-----TGTACAACCTTCTAGCTTT----- mirR 19 4
-----CTGTACAACCTTCTAGCTTTCCTT----- mirR 24 4
-----TGTACAACCTTCTAGCTTTCCTTG----- mirR 24 3
-----TAACTGTACAACCTTCTAGCTTT----- mirR 23 3
-----AACTGTACAACCTTCTAGCT----- mirR 20 2
-----TGTACAACCTTCTAGCTTTCCTT----- mirR 23 2
-----TAACTGTACAACCTTCTAGCTTTC----- mirR 25 2
-----TAACTGTACAACCTTCTAGCTTTC----- mirR 24 2
-----AACTGTACAACCTTCTAGCTT----- mirR 21 2
-----TAACTGTACAACCTTCTAGCT----- mirR 21 1
-----GTACAACCTTCTAGCTTT----- mirR 18 1
-----TGTACAACCTTCTAGCTT----- mirR 18 1
-----ACTGTACAACCTTCTAGCTT----- mirR 20 1
-----ACTGTACAACCTTCTAGCTTT----- mirR 21 1
-----ACTGTACAACCTTCTAGCTTTC----- mirR 22 1
-----CTTGGAGCACACTTGAGCC morR 19 1
-----TCCTTGGAGCACACTTGAGCC morR 21 1

```

>mmu-let-7c-2

```

CTGACTGACGGCCTTTGGGGTGAGGTAGTAGGTTGTATGGTTTTGGGCTCTGCCCCGCTCTGCGGTAACCTATAACAATCTACTGTCTTTCCTGAAGTGCCCGCAATATCTG species len reads
---ACTGACGGCCTTTGGGGTG----- morL 19 2
CTGACTGACGGCCTTTGGG----- morL 19 1
---CTGACGGCCTTTGGGGTG----- morL 18 1
CTGACTGACGGCCTTTGG----- morL 18 1
-----TGAGGTAGTAGGTTGTATGTT----- mirL 22 157225
-----TGAGGTAGTAGGTTGTATGTTT----- mirL 23 73999
-----TGAGGTAGTAGGTTGTATGTT----- mirL 21 56211
-----TGAGGTAGTAGGTTGTATGG----- mirL 20 36977
-----TGAGGTAGTAGGTTGTATGTTTT----- mirL 24 19084
-----TGAGGTAGTAGGTTGTATG----- mirL 19 10389
-----GAGGTAGTAGGTTGTATGTT----- mirL 21 3845
-----TGAGGTAGTAGGTTGTATGTTTTG----- mirL 25 3611
-----GAGGTAGTAGGTTGTATGTTTT----- mirL 22 2442
-----GAGGTAGTAGGTTGTATGTT----- mirL 20 924
-----GAGGTAGTAGGTTGTATGG----- mirL 19 726
-----GAGGTAGTAGGTTGTATGTTTT----- mirL 23 676
-----GAGGTAGTAGGTTGTATG----- mirL 18 156
-----GAGGTAGTAGGTTGTATGTTTTG----- mirL 24 99
-----AGGTAGTAGGTTGTATGTT----- mirL 20 56
-----GGTAGTAGGTTGTATGTT----- mirL 19 37
-----AGGTAGTAGGTTGTATGTTT----- mirL 21 27
-----GTGAGGTAGTAGGTTGTATGTT----- mirL 23 19
-----GGTAGTAGGTTGTATGTT----- mirL 18 17
-----AGGTAGTAGGTTGTATGTT----- mirL 19 13
-----GTGAGGTAGTAGGTTGTATGTT----- mirL 22 13

```

```

-----GGTAGTAGGTTGTATGGTTT----- mirL 20 13
-----AGGTAGTAGGTTGTATGG----- mirL 18 10
-----GTGAGGTAGTAGGTTGTATGGTTT----- mirL 24 5
-----AGGTAGTAGGTTGTATGGTTTT----- mirL 22 4
-----GTGAGGTAGTAGGTTGTATGGTTTT----- mirL 25 4
-----GTGAGGTAGTAGGTTGTATG----- mirL 20 2
-----GGTAGTAGGTTGTATGGTTTT----- mirL 21 2
-----GTGAGGTAGTAGGTTGTAT----- mirL 19 2
-----GTGAGGTAGTAGGTTGTATGG----- mirL 21 2
-----GGTAGTAGGTTGTATGGTTTTGG----- mirL 23 2
-----GGTGAGGTAGTAGGTTGTATGGTT----- mirL 24 1
-----GGGTAGTAGGTTGTATGGTT----- mirL 25 1
-----GGTAGTAGGTTGTATGGTTTTGGG----- mirL 24 1
-----GGTGAGGTAGTAGGTTGTATGGTTTT----- mirL 26 1
-----TTGGGCTCTGCCCCGCTCTGCGGTA----- loop 25 1
-----TTGGGCTCTGCCCCGCTCTGCGGTAA----- loop 26 1
-----CTATACAATCTACTGTCTTTTCCTG----- mirR 24 18
-----CTATACAATCTACTGTCTTTTCCTGA----- mirR 25 15
-----CTATACAATCTACTGTCTTTTCCTGAA----- mirR 26 4
-----CTATACAATCTACTGTCTTTTCCTGAAG----- mirR 27 2
-----CTATACAATCTACTGTCTTTTCCTGAAGT----- mirR 28 1
-----AAGTGCCGCAATATCTG morR 18 1

```

>mmu-mir-181a-1

```

CCTCACAGGTTGCTTCAGTGAACATTC AACGCTGTCGGTGAGTTTGG AATTCAAATAAAAAACCATCGACCGTTGATTGTACCCTATAGCTAACCATCATCTACTCC species len reads
-----CAGGTTGCTTCAGTGAAC----- morL 18 4
CCTCACAGGTTGCTTCAG----- morL 18 1
-----AACATTCAACGCTGTCGGTGAGT----- mirL 23 92989
-----AACATTCAACGCTGTCGGTGA----- mirL 21 43065
-----AACATTCAACGCTGTCGGTGAGTT----- mirL 25 39497
-----AACATTCAACGCTGTCGGTGAG----- mirL 22 37937
-----AACATTCAACGCTGTCGGTGAGTT----- mirL 24 35245
-----AACATTCAACGCTGTCGGTG----- mirL 20 30658
-----AACATTCAACGCTGTCGGT----- mirL 19 20965
-----ACATTCAACGCTGTCGGTGAGT----- mirL 22 266
-----ACATTCAACGCTGTCGGTGAGTT----- mirL 23 186
-----ACATTCAACGCTGTCGGTGAGTTT----- mirL 24 182
-----ACATTCAACGCTGTCGGTGAG----- mirL 21 116
-----ACATTCAACGCTGTCGGTGA----- mirL 20 97
-----ACATTCAACGCTGTCGGTGAGTTG----- mirL 25 91
-----ACATTCAACGCTGTCGGTG----- mirL 19 74
-----ATTCAACGCTGTCGGTGAGT----- mirL 20 44
-----CATTCAACGCTGTCGGTGAGT----- mirL 21 27
-----ATTCAACGCTGTCGGTGAGTT----- mirL 21 17
-----ATTCAACGCTGTCGGTGA----- mirL 18 17
-----ATTCAACGCTGTCGGTGAGTT----- mirL 22 15

```

```

-----ATTCAACGCTGTCGGTGAG----- mirL 19 15
-----ATTCAACGCTGTCGGTGAGTTTG----- mirL 23 13
-----CATTCAACGCTGTCGGTGA----- mirL 19 12
-----CATTCAACGCTGTCGGTGAG----- mirL 20 12
-----GAACATTCAACGCTGTCGGTGAGT----- mirL 24 9
-----CATTCAACGCTGTCGGTGAGTT----- mirL 22 8
-----GAACATTCAACGCTGTCGGTGAG----- mirL 23 4
-----GAACATTCAACGCTGTCGGTGAGTT----- mirL 25 4
-----GAACATTCAACGCTGTCGGTG----- mirL 21 4
-----CATTCAACGCTGTCGGTGAGTT----- mirL 23 3
-----GAACATTCAACGCTGTCGGTGA----- mirL 22 3
-----ATTCAACGCTGTCGGTGAGTTTG----- mirL 24 3
-----CATTCAACGCTGTCGGTGAGTTTG----- mirL 24 3
-----GAACATTCAACGCTGTCGGTGAGTT----- mirL 26 2
-----GAACATTCAACGCTGTCGGT----- mirL 20 2
-----CATTCAACGCTGTCGGTGAGTTTG----- mirL 25 2
-----TGAACATTCAACGCTGTCGGTGAGT----- mirL 25 1
-----GTGAACATTCAACGCTGTCGGTGAGT----- mirL 26 1
-----TGAACATTCAACGCTGTCGGTGA----- mirL 23 1
-----GGAATTCAAATAAAAAACC----- loop 18 2
-----ACCATCGACCGTTGATTGTACC----- mirR 22 9233
-----ACCATCGACCGTTGATTGTAC----- mirR 21 2110
-----ACCATCGACCGTTGATTGTACCC----- mirR 23 1451
-----ACCATCGACCGTTGATTGT----- mirR 19 565
-----ACCATCGACCGTTGATTGTA----- mirR 20 334
-----ACCATCGACCGTTGATTG----- mirR 18 114
-----ACCATCGACCGTTGATTGTACCCT----- mirR 24 85
-----CCATCGACCGTTGATTGTACC----- mirR 21 58
-----AACCATCGACCGTTGATTGTAC----- mirR 22 29
-----CATCGACCGTTGATTGTACC----- mirR 20 25
-----AACCATCGACCGTTGATTGT----- mirR 20 20
-----AACCATCGACCGTTGATTGTACC----- mirR 23 19
-----ATCGACCGTTGATTGTACC----- mirR 19 16
-----CCATCGACCGTTGATTGTAC----- mirR 20 13
-----CATCGACCGTTGATTGTAC----- mirR 19 10
-----AACCATCGACCGTTGATTGTA----- mirR 21 9
-----CCATCGACCGTTGATTGTACCC----- mirR 22 8
-----AACCATCGACCGTTGATTG----- mirR 19 7
-----ATCGACCGTTGATTGTAC----- mirR 18 6
-----AACCATCGACCGTTGATTGTACCC----- mirR 24 5
-----CCATCGACCGTTGATTGT----- mirR 18 4
-----AACCATCGACCGTTGATT----- mirR 18 2
-----ATCGACCGTTGATTGTACCC----- mirR 20 1
-----CCATCGACCGTTGATTGTA----- mirR 19 1
-----AAAACCATCGACCGTTGATTGT----- mirR 22 1
-----CTATAGCTAACCATCATCTACTCC morR 24 1

```

>mmu-mir-107

| TCGATATTTTTCTCTGTGCTTTTACAGTGTTCCTTGTGGCATGGAGTTCAAGCAGCATTGTACAGGGCTATCAAAGCACAGAGAGCTCGCGA | species | len | reads  |
|----------------------------------------------------------------------------------------------|---------|-----|--------|
| ----TATTTTTCTCTGTGCTTTC-----                                                                 | morL    | 19  | 2      |
| --GATATTTTTCTCTGTGCTTTCA-----                                                                | morL    | 22  | 1      |
| ----ATTTTTCTCTGTGCTTTC-----                                                                  | morL    | 18  | 1      |
| TCGATATTTTTCTCTGTGCT-----                                                                    | morL    | 20  | 1      |
| TCGATATTTTTCTCTGTGCT-----                                                                    | morL    | 21  | 1      |
| -----AGCTTCTTTACAGTGTTCCTTG-----                                                             | mirL    | 23  | 695    |
| -----AGCTTCTTTACAGTGTTCCTTGT-----                                                            | mirL    | 24  | 476    |
| -----AGCTTCTTTACAGTGTTCCTT-----                                                              | mirL    | 22  | 460    |
| -----AGCTTCTTTACAGTGTTCCT-----                                                               | mirL    | 21  | 386    |
| -----CAGCTTCTTTACAGTGTTCCTT-----                                                             | mirL    | 23  | 240    |
| -----CAGCTTCTTTACAGTGTTCCTTG-----                                                            | mirL    | 24  | 206    |
| -----CAGCTTCTTTACAGTGTTCCT-----                                                              | mirL    | 22  | 202    |
| -----AGCTTCTTTACAGTGTTCCT-----                                                               | mirL    | 20  | 132    |
| -----AGCTTCTTTACAGTGTTC-----                                                                 | mirL    | 19  | 131    |
| -----AGCTTCTTTACAGTGTTCCTTGT-----                                                            | mirL    | 25  | 128    |
| -----CAGCTTCTTTACAGTGTTC-----                                                                | mirL    | 20  | 67     |
| -----CAGCTTCTTTACAGTGTTCCT-----                                                              | mirL    | 21  | 63     |
| -----CAGCTTCTTTACAGTGT-----                                                                  | mirL    | 18  | 42     |
| -----CAGCTTCTTTACAGTGTTCCTTGT-----                                                           | mirL    | 25  | 39     |
| -----TCAGCTTCTTTACAGTGT-----                                                                 | mirL    | 18  | 4      |
| -----TCAGCTTCTTTACAGTGTTCCT-----                                                             | mirL    | 23  | 2      |
| -----TCAGCTTCTTTACAGTGTTCCTTG-----                                                           | mirL    | 25  | 1      |
| -----GCTTCTTTACAGTGTTCCTTGT-----                                                             | mirL    | 23  | 1      |
| -----GCTTCTTTACAGTGTTC-----                                                                  | mirL    | 18  | 1      |
| -----GCTTCTTTACAGTGTTCCT-----                                                                | mirL    | 19  | 1      |
| -----TGTGGCATGGAGTTCAAG-----                                                                 | loop    | 18  | 1      |
| -----AGCAGCATTGTACAGGGCTATC-----                                                             | mirR    | 22  | 223272 |
| -----AGCAGCATTGTACAGGGCTATCA-----                                                            | mirR    | 23  | 64730  |
| -----AGCAGCATTGTACAGGGCTATCAA-----                                                           | mirR    | 24  | 19802  |
| -----AGCAGCATTGTACAGGGCTATCAAA-----                                                          | mirR    | 25  | 1292   |
| -----CAGCATTGTACAGGGCTATC-----                                                               | mirR    | 20  | 394    |
| -----CAGCATTGTACAGGGCTATCA-----                                                              | mirR    | 21  | 223    |
| -----GCAGCATTGTACAGGGCTATCA-----                                                             | mirR    | 22  | 208    |
| -----GCAGCATTGTACAGGGCTATC-----                                                              | mirR    | 21  | 207    |
| -----AGCAGCATTGTACAGGGCTATCAAAG-----                                                         | mirR    | 26  | 116    |
| -----AAGCAGCATTGTACAGGGCTATC-----                                                            | mirR    | 23  | 113    |
| -----AGCATTGTACAGGGCTATC-----                                                                | mirR    | 19  | 85     |
| -----CAGCATTGTACAGGGCTATCAA-----                                                             | mirR    | 22  | 80     |
| -----AGCAGCATTGTACAGGGCTATCAAAGC-----                                                        | mirR    | 27  | 67     |
| -----AGCATTGTACAGGGCTATCA-----                                                               | mirR    | 20  | 48     |
| -----GCAGCATTGTACAGGGCTATCAA-----                                                            | mirR    | 23  | 26     |
| -----AAGCAGCATTGTACAGGGCTATCA-----                                                           | mirR    | 24  | 25     |
| -----AGCAGCATTGTACAGGGCTATCAAAGCA-----                                                       | mirR    | 28  | 18     |

```

-----AGCATTGTACAGGGCTATCAA----- mirR 21 11
-----CAGCATTGTACAGGGCTATCAAA----- mirR 23 7
-----CAAGCAGCATTGTACAGGGCTATCA----- mirR 25 4
-----CAAGCAGCATTGTACAGGGCTATC----- mirR 24 4
-----TCAAGCAGCATTGTACAGGGCTATC----- mirR 25 1
-----GCAGCATTGTACAGGGCTATCAAA----- mirR 24 1
-----GCAGCATTGTACAGGGCTATCAAAG----- mirR 25 1
-----CAGCATTGTACAGGGCTAT----- mirR 19 1
-----AAAGCACAGAGAGCTCGCGA morR 20 1
-----TCAAAGCACAGAGAGCTCG--- morR 19 1
-----CAAAGCACAGAGAGCTCGCG- morR 20 1

```

>mmu-mir-434

| Sequence                                                                               | species | len | reads |
|----------------------------------------------------------------------------------------|---------|-----|-------|
| GCTCGACTCTGGGTTTGAACCAAAGCTCGACTCATGGTTTGAACCATTACTTAATTCGTGGTTTGAACCATCACTCGACTCCTGGT |         |     |       |
| GCTCGACTCTGGGTTTGAACCA-----                                                            | morL    | 22  | 6     |
| GCTCGACTCTGGGTTTGAACC-----                                                             | morL    | 21  | 4     |
| -CTCGACTCTGGGTTTGAACC-----                                                             | morL    | 20  | 2     |
| ---ACTCTGGGTTTGAACCAAA-----                                                            | morL    | 19  | 2     |
| ---GACTCTGGGTTTGAACCAAA-----                                                           | morL    | 20  | 2     |
| -CTCGACTCTGGGTTTGAACCAA-----                                                           | morL    | 22  | 2     |
| --TCGACTCTGGGTTTGAACCA-----                                                            | morL    | 20  | 1     |
| ---TCTGGGTTTGAACCAAAG-----                                                             | morL    | 18  | 1     |
| --TCGACTCTGGGTTTGAACCAA-----                                                           | morL    | 21  | 1     |
| ---CGACTCTGGGTTTGAACCAA-----                                                           | morL    | 20  | 1     |
| -CTCGACTCTGGGTTTGAACCA-----                                                            | morL    | 21  | 1     |
| -----GCTCGACTCATGGTTTGAACCA-----                                                       | mirL    | 22  | 9160  |
| -----GCTCGACTCATGGTTTGAACC-----                                                        | mirL    | 21  | 8702  |
| -----GCTCGACTCATGGTTTGAAC-----                                                         | mirL    | 20  | 8031  |
| -----AGCTCGACTCATGGTTTGAACC-----                                                       | mirL    | 22  | 6474  |
| -----AGCTCGACTCATGGTTTGAAC-----                                                        | mirL    | 21  | 4853  |
| -----AGCTCGACTCATGGTTTGA-----                                                          | mirL    | 19  | 2100  |
| -----GCTCGACTCATGGTTTGA-----                                                           | mirL    | 19  | 1847  |
| -----AGCTCGACTCATGGTTTGAACCA-----                                                      | mirL    | 23  | 1783  |
| -----AGCTCGACTCATGGTTTGA-----                                                          | mirL    | 20  | 1650  |
| -----GCTCGACTCATGGTTTGAACCAT-----                                                      | mirL    | 23  | 998   |
| -----AGCTCGACTCATGGTTTGA-----                                                          | mirL    | 18  | 488   |
| -----GCTCGACTCATGGTTTGA-----                                                           | mirL    | 18  | 367   |
| -----AGCTCGACTCATGGTTTGAACCAT-----                                                     | mirL    | 24  | 320   |
| -----GCTCGACTCATGGTTTGAACCATT-----                                                     | mirL    | 24  | 308   |
| -----CGACTCATGGTTTGAACC-----                                                           | mirL    | 18  | 46    |
| -----CGACTCATGGTTTGAACCA-----                                                          | mirL    | 19  | 33    |
| -----CTCGACTCATGGTTTGAACCA-----                                                        | mirL    | 21  | 21    |
| -----CTCGACTCATGGTTTGAACC-----                                                         | mirL    | 20  | 17    |
| -----TCGACTCATGGTTTGAACC-----                                                          | mirL    | 19  | 13    |
| -----CTCGACTCATGGTTTGAAC-----                                                          | mirL    | 19  | 12    |
| -----TCGACTCATGGTTTGAACCA-----                                                         | mirL    | 20  | 8     |

```

-----AAGCTCGACTCATGGTTTGAACC----- mirL 23 4
-----TCGACTCATGGTTTGAACCAT----- mirL 21 3
-----CGACTCATGGTTTGAACCAT----- mirL 20 2
-----CTCGACTCATGGTTTGAACCAT----- mirL 22 2
-----TCGACTCATGGTTTGAAC----- mirL 18 1
-----CTCGACTCATGGTTTGAACCATTAC----- mirL 25 1
-----AAGCTCGACTCATGGTTTGAAC----- mirL 22 1
-----CATTACTTAATTCGTGGT----- loop 18 2
-----TTACTTAATTCGTGGTTT----- loop 18 1
-----TTTGAACCATCACTCGACTCCT--- mirR 22 140930
-----TTTGAACCATCACTCGACTCC--- mirR 21 74418
-----TTTGAACCATCACTCGACTC--- mirR 20 9924
-----TTGAACCATCACTCGACTCCT--- mirR 21 8121
-----TTTGAACCATCACTCGACTCCTG-- mirR 23 7670
-----TTTGAACCATCACTCGACTCCTG-- mirR 18 5833
-----TTGAACCATCACTCGACTCC--- mirR 20 5042
-----TTTGAACCATCACTCGACTCCT--- mirR 19 2784
-----GTTTGAACCATCACTCGACTCCT--- mirR 22 1255
-----TTTGAACCATCACTCGACTCCTGG- mirR 24 1016
-----GTTTGAACCATCACTCGACTCCT--- mirR 21 753
-----TTGAACCATCACTCGACTCCT--- mirR 19 552
-----GTTTGAACCATCACTCGACTCCT--- mirR 23 520
-----TTGAACCATCACTCGACTCCTG-- mirR 22 481
-----GAACCATCACTCGACTCCT--- mirR 19 217
-----TGAACCATCACTCGACTCCT--- mirR 20 213
-----TGAACCATCACTCGACTCCT--- mirR 19 137
-----GTTTGAACCATCACTCGACTCCT--- mirR 20 131
-----TTGAACCATCACTCGACTCCT--- mirR 18 128
-----GAACCATCACTCGACTCCT--- mirR 18 94
-----GTTTGAACCATCACTCGACTCCT--- mirR 19 71
-----TTGAACCATCACTCGACTCCTGG- mirR 23 50
-----GTTTGAACCATCACTCGACTCCTG-- mirR 24 30
-----GTTTGAACCATCACTCGACTCCTG-- mirR 18 28
-----TGAACCATCACTCGACTCCTG-- mirR 18 27
-----TTGAACCATCACTCGACTCCTGGT mirR 24 16
-----GAACCATCACTCGACTCCTG-- mirR 20 11
-----TGAACCATCACTCGACTCCTG-- mirR 21 10
-----GGTTTGAACCATCACTCGACTCCT--- mirR 24 7
-----GAACCATCACTCGACTCCTGG- mirR 21 4
-----TGGTTTGAACCATCACTCCT--- mirR 18 3
-----TGGTTTGAACCATCACTCGACTCCT--- mirR 24 2
-----TGAACCATCACTCGACTCCTGG- mirR 22 2
-----GGTTTGAACCATCACTCGACTCCT--- mirR 23 1
-----TGGTTTGAACCATCACTCGACTCCT--- mirR 25 1
-----GGTTTGAACCATCACTCGACTCCT--- mirR 22 1
-----TGGTTTGAACCATCACTCGACTCCT--- mirR 23 1

```

```
-----GAACCATCACTCGACTCCTGGT mirR 22 1

>mmu-mir-338
CGCTGCACAGGCCGTCCTCCCAACAATATCCTGGTGCTGAGTGGGTGCACAGTGACTCCAGCATCAGTGATTTTGTGAAGAG species len reads
--CTGCACAGGCCGTCCTCCCC----- morL 20 15
---TGCACAGGCCGTCCTCCCC----- morL 19 12
--CTGCACAGGCCGTCCTCCC----- morL 19 6
---GCACAGGCCGTCCTCCCC----- morL 18 2
CGCTGCACAGGCCGTCCTCCC----- morL 21 1
---TGCACAGGCCGTCCTCCCA----- morL 20 1
CGCTGCACAGGCCGTCCTCCCC----- morL 22 1
---CACAGGCCGTCCTCCCA----- morL 18 1
---TGCACAGGCCGTCCTCCC----- morL 18 1
---TGCACAGGCCGTCCTCCCA----- morL 21 1
---GCACAGGCCGTCCTCCCA----- morL 19 1
-GCTGCACAGGCCGTCCTCCCC----- morL 21 1
-----AACAAATATCCTGGTGCTGAGT----- mirL 21 14125
-----AACAAATATCCTGGTGCTGAGTG----- mirL 22 4484
-----AACAAATATCCTGGTGCTGAG----- mirL 20 3360
-----AACAAATATCCTGGTGCTGAGTGG----- mirL 23 2071
-----AACAAATATCCTGGTGCTGA----- mirL 19 1161
-----CCAACAATATCCTGGTGCTGA----- mirL 21 1043
-----CCAACAATATCCTGGTGCTGAGT----- mirL 23 834
-----CCAACAATATCCTGGTGCTGAG----- mirL 22 734
-----AACAAATATCCTGGTGCTG----- mirL 18 633
-----CCAACAATATCCTGGTGCTG----- mirL 20 291
-----AACAAATATCCTGGTGCTGAGTGG----- mirL 24 222
-----CCAACAATATCCTGGTGCTGA----- mirL 22 214
-----CCAACAATATCCTGGTGCT----- mirL 19 131
-----CCAACAATATCCTGGTGCTG----- mirL 21 124
-----CCAACAATATCCTGGTGCTGAGT----- mirL 24 115
-----CCAACAATATCCTGGTGCT----- mirL 18 112
-----CAACAATATCCTGGTGCTGA----- mirL 20 109
-----ACAATATCCTGGTGCTGAGTG----- mirL 21 75
-----CAACAATATCCTGGTGCTGAG----- mirL 21 62
-----CCAACAATATCCTGGTGCT----- mirL 20 51
-----CCAACAATATCCTGGTGCTGAG----- mirL 23 41
-----CAACAATATCCTGGTGCTGAGT----- mirL 22 35
-----CAATATCCTGGTGCTGAG----- mirL 18 33
-----CCAACAATATCCTGGTGCT----- mirL 19 31
-----CAATATCCTGGTGCTGAGTG----- mirL 20 30
-----CAACAATATCCTGGTGCTG----- mirL 19 28
-----ACAATATCCTGGTGCTGAG----- mirL 19 26
-----ACAATATCCTGGTGCTGAGT----- mirL 20 22
-----ACAATATCCTGGTGCTGAGTGG----- mirL 22 19
-----CAATATCCTGGTGCTGAGT----- mirL 19 16
```



```

-----CCCAACAATATCCTGGTG----- mirL 18 15
-----ACAATATCCTGGTGCTGA----- mirL 18 15
-----AATATCCTGGTGCTGAGTG----- mirL 19 13
-----AATATCCTGGTGCTGAGT----- mirL 18 9
-----CAACAATATCCTGGTGCTGAGTG----- mirL 23 9
-----CAATATCCTGGTGCTGAGTGG----- mirL 21 7
-----CAACAATATCCTGGTGCT----- mirL 18 5
-----CCCAACAATATCCTGGTGCTGAGT----- mirL 24 3
-----CAACAATATCCTGGTGCTGAGTGG----- mirL 24 3
-----ACAATATCCTGGTGCTGAGTGGG----- mirL 23 2
-----AATATCCTGGTGCTGAGTGG----- mirL 20 2
-----CAATATCCTGGTGCTGAGTGGG----- mirL 22 1
-----TGGGTGCACAGTGACTCC----- loop 18 1
-----TCCAGCATCAGTGATTTTGTG----- mirR 22 101058
-----TCCAGCATCAGTGATTTTGTGGA----- mirR 23 95888
-----TCCAGCATCAGTGATTTTGT----- mirR 21 22483
-----TCCAGCATCAGTGATTTTGT----- mirR 20 18197
-----CCAGCATCAGTGATTTTGTGA----- mirR 22 11013
-----TCCAGCATCAGTGATTTTGTGAA----- mirR 24 8495
-----TCCAGCATCAGTGATTTG----- mirR 19 6103
-----CCAGCATCAGTGATTTTGTG----- mirR 21 5128
-----TCCAGCATCAGTGATTT----- mirR 18 2596
-----CCAGCATCAGTGATTTTGTGAA----- mirR 23 1291
-----CCAGCATCAGTGATTTTGT----- mirR 20 892
-----CCAGCATCAGTGATTTTGT----- mirR 19 461
-----CCAGCATCAGTGATTTT----- mirR 18 186
-----AGCATCAGTGATTTTGTGGA----- mirR 20 101
-----AGCATCAGTGATTTTGTGGAAGA----- mirR 23 76
-----CCAGCATCAGTGATTTTGTGGAAG----- mirR 24 74
-----AGCATCAGTGATTTTGTGGA----- mirR 21 60
-----AGCATCAGTGATTTTGTGGAAG----- mirR 22 59
-----AGCATCAGTGATTTTGTG----- mirR 19 55
-----AGCATCAGTGATTTTGTGGAAGAG----- mirR 24 49
-----CAGCATCAGTGATTTTGTGGA----- mirR 21 34
-----CTCCAGCATCAGTGATTTTGT----- mirR 22 30
-----CTCCAGCATCAGTGATTTTGTGGA----- mirR 24 27
-----CAGCATCAGTGATTTTGTG----- mirR 20 26
-----CTCCAGCATCAGTGATTTTGTG----- mirR 23 21
-----CTCCAGCATCAGTGATTTTGTGGA----- mirR 25 14
-----CAGCATCAGTGATTTTGTGGA----- mirR 22 12
-----CTCCAGCATCAGTGATTTTGT----- mirR 21 9
-----AGCATCAGTGATTTTGT----- mirR 18 8
-----CAGCATCAGTGATTTTGT----- mirR 18 6
-----CAGCATCAGTGATTTTGT----- mirR 19 4
-----CAGCATCAGTGATTTTGTGGAAG----- mirR 23 3
-----CTCCAGCATCAGTGATTTT----- mirR 20 3

```

```

-----CTCCAGCATCAGTGATTT----- mirR 18 3
-----GACTCCAGCATCAGTGATTTTGTG----- mirR 25 3
-----GACTCCAGCATCAGTGATTTTGTG----- mirR 26 2
-----ACTCCAGCATCAGTGATTTTGTG----- mirR 25 2
-----ACTCCAGCATCAGTGATTTTGT----- mirR 22 2
-----ACTCCAGCATCAGTGATTTTGT----- mirR 23 2
-----ACTCCAGCATCAGTGATTTTGTG----- mirR 24 1
-----ACTCCAGCATCAGTGATTTTGT----- mirR 21 1
-----CAGCATCAGTGATTTTGTGAAGA----- mirR 24 1
-----GACTCCAGCATCAGTGAT----- mirR 18 1

```

>mmu-mir-181a-2

| Sequence                                                                                  | species | len   | reads |
|-------------------------------------------------------------------------------------------|---------|-------|-------|
| GGAACATTCAACGCTGTCGGTGAGTTTGGGATTCAAAAACAAAAAACCACCGACCGTTGACTGTACCTTGGGATTCTTACAGACAACAA | mirL 23 | 92989 |       |
| --AACATTCAACGCTGTCGGTGAGT-----                                                            | mirL 21 | 43065 |       |
| --AACATTCAACGCTGTCGGTGA-----                                                              | mirL 25 | 39500 |       |
| --AACATTCAACGCTGTCGGTGAGTT-----                                                           | mirL 22 | 37937 |       |
| --AACATTCAACGCTGTCGGTGAG-----                                                             | mirL 24 | 35243 |       |
| --AACATTCAACGCTGTCGGTG-----                                                               | mirL 20 | 30658 |       |
| --AACATTCAACGCTGTCGGT-----                                                                | mirL 19 | 20965 |       |
| ---ACATTCAACGCTGTCGGTGAGT-----                                                            | mirL 22 | 266   |       |
| ---ACATTCAACGCTGTCGGTGAGTT-----                                                           | mirL 23 | 186   |       |
| ---ACATTCAACGCTGTCGGTGAGTTT-----                                                          | mirL 24 | 182   |       |
| ---ACATTCAACGCTGTCGGTGAG-----                                                             | mirL 21 | 116   |       |
| ---ACATTCAACGCTGTCGGTGA-----                                                              | mirL 20 | 97    |       |
| ---ACATTCAACGCTGTCGGTGAGTTTG-----                                                         | mirL 25 | 91    |       |
| ---ACATTCAACGCTGTCGGTG-----                                                               | mirL 19 | 74    |       |
| ----ATTCAACGCTGTCGGTGAGT-----                                                             | mirL 20 | 44    |       |
| ----CATTCAACGCTGTCGGTGAGT-----                                                            | mirL 21 | 27    |       |
| ----ATTCAACGCTGTCGGTGA-----                                                               | mirL 18 | 17    |       |
| ----ATTCAACGCTGTCGGTGAGTT-----                                                            | mirL 21 | 17    |       |
| ----ATTCAACGCTGTCGGTGAG-----                                                              | mirL 19 | 15    |       |
| ----ATTCAACGCTGTCGGTGAGTTT-----                                                           | mirL 22 | 15    |       |
| ----ATTCAACGCTGTCGGTGAGTTTG-----                                                          | mirL 23 | 13    |       |
| ----CATTCAACGCTGTCGGTGA-----                                                              | mirL 19 | 12    |       |
| ----CATTCAACGCTGTCGGTGAG-----                                                             | mirL 20 | 12    |       |
| -GAACATTCAACGCTGTCGGTGAGT-----                                                            | mirL 24 | 9     |       |
| ----CATTCAACGCTGTCGGTGAGTT-----                                                           | mirL 22 | 8     |       |
| -GAACATTCAACGCTGTCGGTG-----                                                               | mirL 21 | 4     |       |
| -GAACATTCAACGCTGTCGGTGAG-----                                                             | mirL 23 | 4     |       |
| -GAACATTCAACGCTGTCGGTGAGTT-----                                                           | mirL 25 | 4     |       |
| -GAACATTCAACGCTGTCGGTGA-----                                                              | mirL 22 | 3     |       |
| ----CATTCAACGCTGTCGGTGAGTTTG-----                                                         | mirL 24 | 3     |       |
| ----ATTCAACGCTGTCGGTGAGTTTGG-----                                                         | mirL 24 | 3     |       |
| ----CATTCAACGCTGTCGGTGAGTTT-----                                                          | mirL 23 | 3     |       |
| -GAACATTCAACGCTGTCGGT-----                                                                | mirL 20 | 2     |       |

```

----CATTCAACGCTGTCGGTG----- mirL 18 2
-GAACATTCAACGCTGTCGGTGAGTTT----- mirL 26 2
GGAACATTCAACGCTGTCGGTGA----- mirL 23 2
GGAACATTCAACGCTGTCGGTGAG----- mirL 24 1
GGAACATTCAACGCTGTCGGTGAGT----- mirL 25 1
-----GGGATTCAAAAACAAAA----- loop 18 2
-----TGGGATTCAAAAACAAAA----- loop 18 2
-----GGGATTCAAAAACAAAA----- loop 19 1
-----TGGGATTCAAAAACAAAA----- loop 19 1
-----GGATTCAAAAACAAAA----- loop 19 1
-----ACCACCGACCGTTGACTGTACC----- mirR 22 1056
-----ACCGACCGTTGACTGTACCTTG----- mirR 22 462
-----ACCACCGACCGTTGACTGTAC----- mirR 21 255
-----ACCGACCGTTGACTGTACCTT----- mirR 21 146
-----ACCACCGACCGTTGACTGT----- mirR 19 137
-----ACCACCGACCGTTGACTGTACCT----- mirR 23 117
-----ACCGACCGTTGACTGTACCT----- mirR 20 93
-----ACCGACCGTTGACTGTACC----- mirR 19 61
-----ACCACCGACCGTTGACTGT----- mirR 18 47
-----ACCGACCGTTGACTGTAC----- mirR 18 47
-----ACCACCGACCGTTGACTGTAC----- mirR 20 47
-----ACCGACCGTTGACTGTACCTTGG----- mirR 23 34
-----CCACCGACCGTTGACTGTACC----- mirR 21 17
-----CACCGACCGTTGACTGTACC----- mirR 20 17
-----AACCACCGACCGTTGACTGTAC----- mirR 22 16
-----ACCACCGACCGTTGACTGTACCTT----- mirR 24 11
-----AACCACCGACCGTTGACTGT----- mirR 20 9
-----ACCGACCGTTGACTGTACCTTGGG----- mirR 24 6
-----AACCACCGACCGTTGACTGTACC----- mirR 23 5
-----CACCGACCGTTGACTGTACCT----- mirR 21 3
-----AACCACCGACCGTTGACT----- mirR 18 2
-----AACCACCGACCGTTGACTGTACCTT----- mirR 25 1
-----CCACCGACCGTTGACTGTAC----- mirR 20 1
-----AACCACCGACCGTTGACTGTAC----- mirR 21 1
-----CCACCGACCGTTGACTGT----- mirR 18 1
-----TGGGATTCTTACAGACAA----- morR 18 1
-----GGGATTCTTACAGACAACAA----- morR 20 1
-----GGGATTCTTACAGACAAC----- morR 18 1
-----GGATTCTTACAGACAACA----- morR 18 1

```

>mmu-mir-139

```

CCAGGACAGGCGCAGGTGTATTCTACAGTGCACGTGTCTCCAGTGTGGCTCGGAGGCTGGAGACGCGGCCCTGTTGGAGTAACAACCTGAAGCCAGAGTCT species len reads
CCAGGACAGGCGCAGGTGTAT----- morL 21 14
-CAGGACAGGCGCAGGTGTAT----- morL 20 4
-CAGGACAGGCGCAGGTGT----- morL 18 1
----GACAGGCGCAGGTGTATT----- morL 18 1

```

```

-----TCTACAGTGCACGTGTCTCCAG----- mirL 22 114538
-----TCTACAGTGCACGTGTCTCCA----- mirL 21 55507
-----TCTACAGTGCACGTGTCTCCAGT----- mirL 23 41325
-----TCTACAGTGCACGTGTCTCC----- mirL 20 38844
-----TCTACAGTGCACGTGTCTCCAGTG----- mirL 24 20837
-----TCTACAGTGCACGTGTCTC----- mirL 19 9649
-----TCTACAGTGCACGTGTCT----- mirL 18 8255
-----CTACAGTGCACGTGTCTCCAG----- mirL 21 4387
-----CTACAGTGCACGTGTCTCCA----- mirL 20 1724
-----CTACAGTGCACGTGTCTCCAGT----- mirL 22 1604
-----CTACAGTGCACGTGTCTCCAGTG----- mirL 23 959
-----CTACAGTGCACGTGTCTCC----- mirL 19 915
-----CTACAGTGCACGTGTCTCCAGTGT----- mirL 24 268
-----CTACAGTGCACGTGTCTC----- mirL 18 181
-----TTCTACAGTGCACGTGTCTCCAG----- mirL 23 76
-----TTCTACAGTGCACGTGTCTCCA----- mirL 22 69
-----TACAGTGCACGTGTCTCCAG----- mirL 20 53
-----ACAGTGCACGTGTCTCCAG----- mirL 19 39
-----TTCTACAGTGCACGTGTCTCC----- mirL 21 28
-----ACAGTGCACGTGTCTCCAGT----- mirL 20 23
-----TTCTACAGTGCACGTGTCTCCAGT----- mirL 24 22
-----ACAGTGCACGTGTCTCCA----- mirL 18 19
-----TACAGTGCACGTGTCTCCA----- mirL 19 16
-----TACAGTGCACGTGTCTCC----- mirL 18 15
-----ACAGTGCACGTGTCTCCAGTG----- mirL 21 15
-----TACAGTGCACGTGTCTCCAGT----- mirL 21 13
-----TTCTACAGTGCACGTGTCTCCAGTG----- mirL 25 13
-----ATTCTACAGTGCACGTGTCTCC----- mirL 22 9
-----TACAGTGCACGTGTCTCCAGTG----- mirL 22 9
-----TTCTACAGTGCACGTGTCT----- mirL 19 8
-----ACAGTGCACGTGTCTCCAGTGT----- mirL 22 8
-----TTCTACAGTGCACGTGTCTC----- mirL 20 6
-----ACAGTGCACGTGTCTCCAGTGTG----- mirL 23 4
-----ATTCTACAGTGCACGTGTCTCCAG----- mirL 24 3
-----TACAGTGCACGTGTCTCCAGTGT----- mirL 23 3
-----TATTCTACAGTGCACGTGTCTC----- mirL 22 2
-----ATTCTACAGTGCACGTGTCTCCA----- mirL 23 2
-----ATTCTACAGTGCACGTGT----- mirL 18 1
-----ATTCTACAGTGCACGTGTCT----- mirL 20 1
-----TATTCTACAGTGCACGTGTCTCCAGT----- mirL 26 1
-----ATTCTACAGTGCACGTGTCTCCAGT----- mirL 25 1
-----ATTCTACAGTGCACGTGTCTC----- mirL 19 1
-----AGTGTGGCTCGGAGGCTGG----- loop 19 1
-----TGGAGACGGCCCTGTTGGAGT----- mirR 23 701
-----TGGAGACGGCCCTGTTGGAG----- mirR 22 671
-----TGGAGACGGCCCTGTTGG----- mirR 20 609

```

```

-----TGGAGACGCGGCCCTGTTGGA----- mirR 21 457
-----TGGAGACGCGGCCCTGTTGGAGTA----- mirR 24 362
-----TGGAGACGCGGCCCTGTTG----- mirR 19 324
-----TGGAGACGCGGCCCTGTT----- mirR 18 166
-----GGAGACGCGGCCCTGTTGGAGT----- mirR 22 91
-----AGACGCGGCCCTGTTGGAGTAA----- mirR 22 77
-----GGAGACGCGGCCCTGTTGGAGTA----- mirR 23 75
-----AGACGCGGCCCTGTTGGAGTAAC----- mirR 23 45
-----AGACGCGGCCCTGTTGGAGTA----- mirR 21 42
-----GGAGACGCGGCCCTGTTG----- mirR 18 29
-----GGAGACGCGGCCCTGTTGG----- mirR 19 24
-----GGAGACGCGGCCCTGTTGGAG----- mirR 21 21
-----GGAGACGCGGCCCTGTTGGA----- mirR 20 12
-----AGACGCGGCCCTGTTGGAG----- mirR 19 11
-----AGACGCGGCCCTGTTGGAGT----- mirR 20 9
-----GGAGACGCGGCCCTGTTGGAGTAA----- mirR 24 8
-----AGACGCGGCCCTGTTGGA----- mirR 18 7
-----AGACGCGGCCCTGTTGGAGTAACA----- mirR 24 6
-----GAGACGCGGCCCTGTTGGAGTA----- mirR 22 3
-----CTGGAGACGCGGCCCTGTTG----- mirR 20 3
-----CTGGAGACGCGGCCCTGTTGGAGTA----- mirR 25 2
-----GAGACGCGGCCCTGTTGGAGT----- mirR 21 2
-----CTGGAGACGCGGCCCTGT----- mirR 18 2
-----GAGACGCGGCCCTGTTGGA----- mirR 19 1
-----GAGACGCGGCCCTGTTGG----- mirR 18 1
-----CTGGAGACGCGGCCCTGTTGGA----- mirR 22 1
-----GCTGGAGACGCGGCCCTG----- mirR 18 1
-----CAACTGAAGCCAGAGTCT morR 18 1

>mmu-let-7a-1
TGTTCTCTTCACTGTGGGATGAGGTAGTAGGTTGTATAGTTTTAGGGTCACACCCACCCTGGGAGATAACTATACAATCTACTGTCTTTCCTAAGGTGATGGAAAAGTCTGCAT species len reads
--TCTCTTCACTGTGGGATG----- morL 19 1
---CTCTTCACTGTGGGATGA----- morL 18 1
TGTTCTCTTCACTGTGGG----- morL 18 1
---TCTCTTCACTGTGGGATGA----- morL 19 1
-GTTCTCTTCACTGTGGGA----- morL 18 1
-----TGAGGTAGTAGGTTGTATAGTT----- mirL 22 132713
-----TGAGGTAGTAGGTTGTATAGTTT----- mirL 23 49225
-----TGAGGTAGTAGGTTGTATAGT----- mirL 21 46017
-----TGAGGTAGTAGGTTGTATAG----- mirL 20 44456
-----TGAGGTAGTAGGTTGTATAGTTTT----- mirL 24 14690
-----TGAGGTAGTAGGTTGTATAG----- mirL 19 5358
-----GAGGTAGTAGGTTGTATAGTT----- mirL 21 2990
-----TGAGGTAGTAGGTTGTATAGTTTTA----- mirL 25 1889
-----GAGGTAGTAGGTTGTATAGTTT----- mirL 22 1304
-----GAGGTAGTAGGTTGTATAG----- mirL 19 694

```

```

-----GAGGTAGTAGGTTGTATAGT----- mirL 20 671
-----GAGGTAGTAGGTTGTATAGTTTT----- mirL 23 429
-----ATGAGGTAGTAGGTTGTATAGTT----- mirL 23 86
-----GAGGTAGTAGGTTGTATAGTTTTA----- mirL 24 60
-----GAGGTAGTAGGTTGTATA----- mirL 18 54
-----ATGAGGTAGTAGGTTGTATAGTTTT----- mirL 24 40
-----AGGTAGTAGGTTGTATAG----- mirL 18 37
-----AGGTAGTAGGTTGTATAGTT----- mirL 20 36
-----ATGAGGTAGTAGGTTGTATAGT----- mirL 22 32
-----GGTAGTAGGTTGTATAGT----- mirL 18 19
-----GGTAGTAGGTTGTATAGTT----- mirL 19 18
-----ATGAGGTAGTAGGTTGTATAG----- mirL 21 16
-----AGGTAGTAGGTTGTATAGT----- mirL 19 16
-----ATGAGGTAGTAGGTTGTATA----- mirL 20 13
-----ATGAGGTAGTAGGTTGTATAGTTTT----- mirL 25 12
-----AGGTAGTAGGTTGTATAGTTTT----- mirL 22 8
-----AGGTAGTAGGTTGTATAGTT----- mirL 21 8
-----GGTAGTAGGTTGTATAGTT----- mirL 20 7
-----ATGAGGTAGTAGGTTGTAT----- mirL 19 5
-----GGTAGTAGGTTGTATAGTTTT----- mirL 21 2
-----GATGAGGTAGTAGGTTGTATAGTT----- mirL 24 2
-----GGATGAGGTAGTAGGTTGTATAGTT----- mirL 25 1
-----GATGAGGTAGTAGGTTGTATA----- mirL 21 1
-----GGATGAGGTAGTAGGTTGTATAGT----- mirL 24 1
-----GGATGAGGTAGTAGGTTGTATAG----- mirL 23 1
-----TTAGGGTCACACCCACCACTGGGAGA----- loop 26 12
-----TTAGGGTCACACCCACCACTGGGAGATAA----- loop 29 8
-----TTAGGGTCACACCCACCACTGGGAGAT----- loop 27 6
-----TTAGGGTCACACCCACCACTGGGAGATA----- loop 28 3
-----GGGTCACACCCACCACTGGGAGA----- loop 23 1
-----TAGGGTCACACCCACCACTGGGAGATAA----- loop 28 1
-----GGGTCACACCCACCACTGGGAGATAA----- loop 26 1
-----AGGGTCACACCCACCACTGGGAGATAA----- loop 27 1
-----TAGGGTCACACCCACCACTGGGAGA----- loop 25 1
-----CTATACAATCTACTGTCTTTCCTA----- mirR 24 23
-----CTATACAATCTACTGTCTTTCCTAAG----- mirR 26 10
-----CTATACAATCTACTGTCTTTCCTAA----- mirR 25 4
-----CTATACAATCTACTGTCTTTCCTAAGGTGA----- mirR 30 2
-----CTATACAATCTACTGTCTTTCCTAAGGTG----- mirR 29 1
-----CTAAGGTGATGGAAAAGTCTGCAT morR 24 1
-----CTAAGGTGATGGAAAAGTCTGC-- morR 22 1

```

>mmu-let-7a-2

```

CCAGCCATGTGACTGCATGTTCCAGGTTGAGGTAGTAGGTTGTATAGTTTAGAGTTACATCAAGGGAGATAACTGTACAGCCTCTAGCTTTCCTTGGGACTTGACAAAAGCAAC species len reads
-----GTGACTGCATGTTCCAGGT----- morL 20 3
-----TGACTGCATGTTCCAG----- morL 19 1

```

```

CCAGCCATTGTGACTGCATGTTCCAGGT----- morL 29 1
-----TGAGGTAGTAGGTTGTATAGTT----- mirL 22 132712
-----TGAGGTAGTAGGTTGTATAGTTT----- mirL 23 49225
-----TGAGGTAGTAGGTTGTATAGT----- mirL 21 46017
-----TGAGGTAGTAGGTTGTATAG----- mirL 20 44456
-----TGAGGTAGTAGGTTGTATAGTTTA----- mirL 24 11987
-----TGAGGTAGTAGGTTGTATA----- mirL 19 5357
-----GAGGTAGTAGGTTGTATAGTT----- mirL 21 2990
-----TGAGGTAGTAGGTTGTATAGTTTAG----- mirL 25 1371
-----GAGGTAGTAGGTTGTATAGTTT----- mirL 22 1304
-----GAGGTAGTAGGTTGTATAG----- mirL 19 694
-----GAGGTAGTAGGTTGTATAGT----- mirL 20 671
-----GAGGTAGTAGGTTGTATAGTTTA----- mirL 23 404
-----TTGAGGTAGTAGGTTGTATAGTT----- mirL 23 85
-----TTGAGGTAGTAGGTTGTATAGT----- mirL 22 55
-----GAGGTAGTAGGTTGTATA----- mirL 18 54
-----GAGGTAGTAGGTTGTATAGTTTAG----- mirL 24 47
-----TTGAGGTAGTAGGTTGTATAG----- mirL 21 45
-----AGGTAGTAGGTTGTATAG----- mirL 18 37
-----AGGTAGTAGGTTGTATAGTT----- mirL 20 36
-----TTGAGGTAGTAGGTTGTATAGTTT----- mirL 24 28
-----GGTAGTAGGTTGTATAGT----- mirL 18 19
-----GGTAGTAGGTTGTATAGTT----- mirL 19 18
-----AGGTAGTAGGTTGTATAGT----- mirL 19 16
-----TTGAGGTAGTAGGTTGTATAGTTTA----- mirL 25 12
-----AGGTAGTAGGTTGTATAGTTTA----- mirL 22 11
-----AGGTAGTAGGTTGTATAGTTT----- mirL 21 8
-----GGTAGTAGGTTGTATAGTTT----- mirL 20 7
-----TTGAGGTAGTAGGTTGTATA----- mirL 20 6
-----GGTTGAGGTAGTAGGTTGTATAGT----- mirL 24 4
-----GGTTGAGGTAGTAGGTTGTATAGTT----- mirL 25 4
-----GGTTGAGGTAGTAGGTTGTATA----- mirL 22 4
-----GTTGAGGTAGTAGGTTGTATAGTT----- mirL 24 3
-----GTTGAGGTAGTAGGTTGTATAGT----- mirL 23 3
-----GTTGAGGTAGTAGGTTGTATAG----- mirL 22 2
-----GGTTGAGGTAGTAGGTTGTATAG----- mirL 23 1
-----GGTAGTAGGTTGTATAGTTTA----- mirL 21 1
-----GTTGAGGTAGTAGGTTGTA----- mirL 19 1
-----AGGTAGTAGGTTGTATAGTTTAG----- mirL 23 1
-----TAGAGTTACATCAAGGGAGAT----- loop 21 6
-----TAGAGTTACATCAAGGGAGATAAC----- loop 24 3
-----TAGAGTTACATCAAGGGAGATAA----- loop 23 3
-----TAGAGTTACATCAAGGGAGA----- loop 20 2
-----TAGAGTTACATCAAGGGAGATA----- loop 22 2
-----AGTTACATCAAGGGAGAT----- loop 18 1
-----CTGTACAGCCTCCTAGCTTTCC----- mirR 22 1090

```

```

-----CTGTACAGCCTCCTAGCTTTCC----- mirR 21 332
-----CTGTACAGCCTCCTAGCTTT----- mirR 20 115
-----CTGTACAGCCTCCTAGCTTTCCCT----- mirR 23 93
-----TGTACAGCCTCCTAGCTTTCC----- mirR 21 42
-----ACTGTACAGCCTCCTAGCTTTCC----- mirR 22 31
-----CTGTACAGCCTCCTAGCTTT----- mirR 19 26
-----GTACAGCCTCCTAGCTTTCC----- mirR 20 18
-----CTGTACAGCCTCCTAGCT----- mirR 18 17
-----ACTGTACAGCCTCCTAGCTTT----- mirR 21 11
-----CTGTACAGCCTCCTAGCTTTCCCT----- mirR 24 9
-----TGTACAGCCTCCTAGCTTTCC----- mirR 20 9
-----ACTGTACAGCCTCCTAGCTTTCC----- mirR 23 6
-----TACAGCCTCCTAGCTTTCC----- mirR 19 6
-----TGTACAGCCTCCTAGCTTTCCCT----- mirR 22 6
-----TGTACAGCCTCCTAGCTTT----- mirR 19 4
-----ACTGTACAGCCTCCTAGC----- mirR 18 3
-----ACTGTACAGCCTCCTAGCT----- mirR 19 3
-----GTACAGCCTCCTAGCTTT----- mirR 18 3
-----GTACAGCCTCCTAGCTTTCC----- mirR 19 3
-----TACAGCCTCCTAGCTTTCCCT----- mirR 20 2
-----TGTACAGCCTCCTAGCTTT----- mirR 18 1
-----AACTGTACAGCCTCCTAGCTTTCC----- mirR 24 1
-----GTACAGCCTCCTAGCTTTCCCT----- mirR 21 1
-----TAACTGTACAGCCTCCTAG----- mirR 19 1
-----TAACTGTACAGCCTCCTAGCTTTCC----- mirR 24 1
-----TAACTGTACAGCCTCCTAGCTTT----- mirR 23 1
-----AACTGTACAGCCTCCTAGCTTTCC----- mirR 23 1
-----TAACTGTACAGCCTCCTAGCT----- mirR 21 1
-----ACTGTACAGCCTCCTAGCTTTCCCT----- mirR 25 1
-----CCTTGGGACTTGACAAAAG----- morR 19 1
-----GGACTTGACAAAAGCAAC morR 18 1

```

>mmu-mir-7a-1

```

TGGATGTTGGCCTAGTTCTGTGTGGAAGACTAGTGATTTTGTGTTTGTAGATAACTAAAACGACAACAAATCACAGTCTGCCATATGGCACAGGCCACCTCTACAGG species len reads
---ATGTTGGCCTAGTTCTGTGT----- morL 20 2
-GGATGTTGGCCTAGTTCTGTG----- morL 21 1
---ATGTTGGCCTAGTTCTGTG----- morL 19 1
TGGATGTTGGCCTAGTTCTGTG----- morL 22 1
-----TGGAAGACTAGTGATTTTGTGTT----- mirL 24 95064
-----TGGAAGACTAGTGATTTTGTGTT----- mirL 23 54861
-----TGGAAGACTAGTGATTTTGTGTT----- mirL 25 13797
-----TGGAAGACTAGTGATTTTGTGTT----- mirL 22 11039
-----TGGAAGACTAGTGATTTTGT----- mirL 20 7916
-----GGAAGACTAGTGATTTTGTGTT----- mirL 23 4501
-----TGGAAGACTAGTGATTTTGT----- mirL 21 3513
-----TGGAAGACTAGTGATTTG----- mirL 19 2698

```



```

-----GGAAGACTAGTGATTTTGTTG----- mirL 22 2316
-----GGAAGACTAGTGATTTTGTTG----- mirL 21 469
-----GGAAGACTAGTGATTTTGTTGTT----- mirL 24 196
-----GGAAGACTAGTGATTTTGTT----- mirL 20 136
-----GGAAGACTAGTGATTTTGT----- mirL 19 117
-----GGAAGACTAGTGATTTTGTTGTTT----- mirL 25 84
-----GAAGACTAGTGATTTTGTTG----- mirL 21 32
-----GAAGACTAGTGATTTTGTTGTT----- mirL 22 32
-----GAAGACTAGTGATTTTGTTG----- mirL 20 29
-----AAGACTAGTGATTTTGTTGTT----- mirL 21 26
-----AAGACTAGTGATTTTGTTG----- mirL 19 23
-----GTGGAAGACTAGTGATTTTGTTGTT----- mirL 25 22
-----AAGACTAGTGATTTTGTTG----- mirL 20 8
-----GAAGACTAGTGATTTTGT----- mirL 18 6
-----AAGACTAGTGATTTTGTT----- mirL 18 5
-----GAAGACTAGTGATTTTGTT----- mirL 19 5
-----GTGGAAGACTAGTGATTTTGTTG----- mirL 24 3
-----GTGGAAGACTAGTGATTTTGTT----- mirL 22 3
-----GTGGAAGACTAGTGATTTTGT----- mirL 21 3
-----GAAGACTAGTGATTTTGTTGTT----- mirL 23 3
-----TGTGGAAGACTAGTGATT----- mirL 18 2
-----TGTGGAAGACTAGTGATTTTGTT----- mirL 23 2
-----GTGGAAGACTAGTGATT----- mirL 18 1
-----AAGACTAGTGATTTTGTTGTT----- mirL 22 1
-----GAAGACTAGTGATTTTGTTGTTT----- mirL 24 1
-----GTGGAAGACTAGTGATTTG----- mirL 20 1
-----TAGATAACTAAAACGACAA----- loop 19 1
-----CAACAAATCACAGTCTGCCATA----- mirR 22 24234
-----CAACAAATCACAGTCTGCCAT----- mirR 21 13474
-----ACAACAAATCACAGTCTGCCAT----- mirR 22 7681
-----CAACAAATCACAGTCTGCCATAT----- mirR 23 6949
-----AACAAATCACAGTCTGCCATA----- mirR 21 4229
-----CAACAAATCACAGTCTGCC----- mirR 19 2881
-----AACAAATCACAGTCTGCCAT----- mirR 20 2017
-----AACAAATCACAGTCTGCCATAT----- mirR 22 1849
-----CAACAAATCACAGTCTGCCA----- mirR 20 1813
-----ACAACAAATCACAGTCTGCCA----- mirR 21 907
-----ACAACAAATCACAGTCTGCCATA----- mirR 23 860
-----CAACAAATCACAGTCTGCC----- mirR 18 838
-----AACAAATCACAGTCTGCC----- mirR 18 381
-----ACAAATCACAGTCTGCCATAT----- mirR 21 350
-----CAACAAATCACAGTCTGCCATATG----- mirR 24 325
-----GACAACAAATCACAGTCTGCCAT----- mirR 23 259
-----AACAAATCACAGTCTGCCA----- mirR 19 249
-----ACAAATCACAGTCTGCCAT----- mirR 19 165
-----CAAATCACAGTCTGCCAT----- mirR 18 108

```

```

-----GACAACAAATCACAGTCTGCCA----- mirR 22 107
-----ACAACAAATCACAGTCTGC----- mirR 19 104
-----ACAACAAATCACAGTCTGCC----- mirR 20 99
-----ACAAATCACAGTCTGCCATA----- mirR 20 84
-----AACAAATCACAGTCTGCCATATG----- mirR 23 77
-----GACAACAAATCACAGTCTGCC----- mirR 21 75
-----GACAACAAATCACAGTCTGCCATA----- mirR 24 71
-----CGACAACAAATCACAGTCTGCC----- mirR 22 48
-----GACAACAAATCACAGTCTGC----- mirR 20 45
-----ACAACAAATCACAGTCTG----- mirR 18 41
-----CAAATCACAGTCTGCCATA----- mirR 19 40
-----ACAACAAATCACAGTCTGCCATAT----- mirR 24 40
-----CGACAACAAATCACAGTCTGCCAT----- mirR 24 40
-----CGACAACAAATCACAGTCTGC----- mirR 21 39
-----ACAAATCACAGTCTGCCATATG----- mirR 22 34
-----ACAAATCACAGTCTGCCA----- mirR 18 25
-----CGACAACAAATCACAGTCTGCCA----- mirR 23 19
-----CGACAACAAATCACAGTCTGCCATA----- mirR 25 19
-----GACAACAAATCACAGTCTGCCATAT----- mirR 25 16
-----CGACAACAAATCACAGTC----- mirR 18 13
-----AACAAATCACAGTCTGCCATATGG----- mirR 24 11
-----GACAACAAATCACAGTCTG----- mirR 19 10
-----CGACAACAAATCACAGTCTGCCATAT----- mirR 26 9
-----ACAAATCACAGTCTGCCATATGG----- mirR 24 6
-----CAAATCACAGTCTGCCATAT----- mirR 20 5
-----ACAAATCACAGTCTGCCATATGG----- mirR 23 4
-----GCACAGGCCACCTCTACA-- morR 18 1
-----ATGGCACAGGCCACCTCT----- morR 18 1
-----GCACAGGCCACCTCTACAGG morR 20 1
-----TATGGCACAGGCCACCTC----- morR 18 1
-----GGCACAGGCCACCTCTACA-- morR 19 1
-----ATATGGCACAGGCCACCTCT----- morR 20 1
-----CACAGGCCACCTCTACAG- morR 18 1

```

>mmu-mir-129-1

```

TTCCCACAGCTGTCTCCTTTGGATCTTTTTGCGGTCTGGGCTTGCTGTTCTCTCGACAGTAGTCAGGAAGCCCTTACCCCAAAAAGTATCTA species len reads
--CCCACAGCTGTCTCCTTTG----- morL 19 2
--CCCACAGCTGTCTCCTTTGG----- morL 20 2
---CACAGCTGTCTCCTTTGG----- morL 18 1
TTCCCACAGCTGTCTCCTTTG----- morL 21 1
-----AGCTGTCTCCTTTGGATC----- morL 18 1
-----CTTTTTGCGGTCTGGGCTTGC----- mirL 21 23562
-----CTTTTTGCGGTCTGGGCTTGCT----- mirL 22 5278
-----CTTTTTGCGGTCTGGGCTTG----- mirL 20 1935
-----CTTTTTGCGGTCTGGGCTT----- mirL 19 1383
-----CTTTTTGCGGTCTGGGCTTGCTG----- mirL 23 1204

```

```

-----CTTTTTCGGTCTGGGCT----- mirL 18 521
-----CTTTTTCGGTCTGGGCTTGCTGT----- mirL 24 371
-----TTTTTCGGTCTGGGCTTGC----- mirL 20 30
-----TTTTCGGTCTGGGCTTGC----- mirL 18 27
-----TTTTTCGGTCTGGGCTTGC----- mirL 19 17
-----TTTTTCGGTCTGGGCTTGCT----- mirL 21 17
-----TTTTTCGGTCTGGGCTTGCTGT----- mirL 23 17
-----TCTTTTTCGGTCTGGGCTTGC----- mirL 22 14
-----TTTTTCGGTCTGGGCTTGCTG----- mirL 22 12
-----TTTTCGGTCTGGGCTTGCT----- mirL 19 6
-----TTTTTCGGTCTGGGCTTGC----- mirL 20 6
-----TTTTTCGGTCTGGGCTTGCTGT----- mirL 22 4
-----TTTTTCGGTCTGGGCTTGCTGTT----- mirL 24 4
-----TTTTTCGGTCTGGGCTTGCTGTT----- mirL 23 4
-----TTTTTCGGTCTGGGCTTGCTGTT----- mirL 25 4
-----TTTTTCGGTCTGGGCTTG----- mirL 19 3
-----ATCTTTTTCGGTCTGGGCTTGC----- mirL 23 2
-----TCTTTTTCGGTCTGGGC----- mirL 18 2
-----TTTTTCGGTCTGGGCTTGCTG----- mirL 21 2
-----TCTTTTTCGGTCTGGGCTTGCT----- mirL 23 2
-----TTTTTCGGTCTGGGCTTG----- mirL 18 2
-----ATCTTTTTCGGTCTGGG----- mirL 18 2
-----GATCTTTTTCGGTCTGGGCTTGC----- mirL 24 2
-----TTTTTCGGTCTGGGCTTGCTGTT----- mirL 24 1
-----ATCTTTTTCGGTCTGGGCTTG----- mirL 22 1
-----TCTTTTTCGGTCTGGGCTTG----- mirL 21 1
-----ATCTTTTTCGGTCTGGGCTTGCTGTT----- mirL 27 1
-----TTTTTCGGTCTGGGCTTGCTGT----- mirL 21 1
-----ATCTTTTTCGGTCTGGGC----- mirL 19 1
-----TCTCTCGACAGTAGTCAG----- loop 18 2
-----TCTCTCGACAGTAGTCAGGA----- loop 20 2
-----AAGCCCTTACCCAAAAAGTATC----- mirR 23 119058
-----AAGCCCTTACCCAAAAAGTAT----- mirR 22 50187
-----AAGCCCTTACCCAAAAAGTA----- mirR 21 35445
-----AAGCCCTTACCCAAAAAG----- mirR 19 9064
-----AAGCCCTTACCCAAAAAGT----- mirR 20 8238
-----AAGCCCTTACCCAAAA----- mirR 18 5990
-----AAGCCCTTACCCAAAAAGTATCT----- mirR 24 506
-----GAAGCCCTTACCCAAAAAGTA----- mirR 22 416
-----GGAAGCCCTTACCCAAAAAGTAT----- mirR 24 409
-----AGCCCTTACCCAAAAAGTAT----- mirR 21 365
-----GGAAGCCCTTACCCAAAAAGT----- mirR 22 280
-----GGAAGCCCTTACCCAAAAAGTA----- mirR 23 264
-----GAAGCCCTTACCCAAAAAGTAT----- mirR 23 251
-----GGAAGCCCTTACCCAAAAAGTATC----- mirR 25 196
-----GAAGCCCTTACCCAAAAAGT----- mirR 21 175

```

```

-----AGCCCTTACCCCAAAAAGTATC-- mirR 22 151
-----GGAAGCCCTTACCCCAAAA----- mirR 20 116
-----GAAGCCCTTACCCCAAAAAGTATC-- mirR 24 99
-----GGAAGCCCTTACCCCAAAA----- mirR 18 88
-----GGAAGCCCTTACCCCAAAA----- mirR 19 79
-----GAAGCCCTTACCCCAAAA----- mirR 19 69
-----CCCTTACCCCAAAAAGTATC-- mirR 19 62
-----GCCCTTACCCCAAAAAGTATC-- mirR 20 56
-----AGCCCTTACCCCAAAAAGT----- mirR 19 50
-----AGCCCTTACCCCAAAAAGTA----- mirR 20 47
-----GAAGCCCTTACCCCAAAAAG----- mirR 20 40
-----AGCCCTTACCCCAAAAAG----- mirR 18 40
-----GAAGCCCTTACCCCAAAA----- mirR 18 38
-----AGCCCTTACCCCAAAAAGTATCT- mirR 23 10
-----GCCCTTACCCCAAAAAGTA----- mirR 19 10
-----GCCCTTACCCCAAAAAGT----- mirR 18 4
-----CCCTTACCCCAAAAAGTA----- mirR 18 3
-----CCCTTACCCCAAAAAGTATC-- mirR 20 3
-----GCCCTTACCCCAAAAAGTATC-- mirR 21 2
-----AGCCCTTACCCCAAAAAGTATCTA mirR 24 1

>mmu-mir-132
GCCCCGCCCCGCGTCTCCAGGGCAACCGTGGCTTTCGATTGTACTGTGGGAACCGAGGTAACAGTCTACAGCCATGGTCGCCCGCAGCAGCCCACGCTCCCC species len reads
-----CCCCGCGTCTCCAGGGCA----- morL 19 8
--CCC GCCCGTCTCCAGGGCA----- morL 23 6
-----CCCCGCGTCTCCAGGGCA----- morL 18 3
---CCGCCCGTCTCCAGGGCA----- morL 22 2
-----GCCCGCGTCTCCAGGGCA----- morL 20 2
GCCCCGCCCCGCGTCTCCAGGGC----- morL 24 2
-CCCCGCCCCGCGTCTCCAGGGCA----- morL 24 2
-----CCCCGCGTCTCCAGGGCAA----- morL 18 2
-----CCCCGCGTCTCCAGGGC----- morL 18 1
--CCGCCCGTCTCCAGGGCAA----- morL 24 1
---CGCCCCGCGTCTCCAGGGCA----- morL 21 1
--CCC GCCCGTCTCCAGGGCAAC----- morL 25 1
GCCCCGCCCCGCGTCTCCAGG----- morL 22 1
-----CCCCGCGTCTCCAGGGCAA----- morL 19 1
-----GCCCGCGTCTCCAGGGC----- morL 19 1
-----CCCCGCGTCTCCAGGGCAA----- morL 21 1
-----ACCGTGGCTTTCGATTGTACT----- mirL 22 25776
-----ACCGTGGCTTTCGATTGTACT----- mirL 21 9871
-----AACCGTGGCTTTCGATTGTACT----- mirL 21 7541
-----ACCGTGGCTTTCGATTGTACT----- mirL 20 4172
-----AACCGTGGCTTTCGATTGTACT----- mirL 22 3080
-----AACCGTGGCTTTCGATTGTACT----- mirL 20 2472
-----ACCGTGGCTTTCGATTGTACT----- mirL 23 1826

```

```

-----ACCGTGGCTTTCGATTGTT----- mirL 19 1333
-----AACCGTGGCTTTCGATTGT----- mirL 19 944
-----ACCGTGGCTTTCGATTGT----- mirL 18 759
-----ACCGTGGCTTTCGATTGTTACTGT----- mirL 24 629
-----AACCGTGGCTTTCGATTG----- mirL 18 320
-----AACCGTGGCTTTCGATTGTTACT----- mirL 23 217
-----CCGTGGCTTTCGATTGTTACT----- mirL 21 50
-----GTGGCTTTCGATTGTTACT----- mirL 19 44
-----CGTGGCTTTCGATTGTTACT----- mirL 20 38
-----AACCGTGGCTTTCGATTGTTACTG----- mirL 24 24
-----CAACCGTGGCTTTCGATTGTTA----- mirL 22 17
-----GTGGCTTTCGATTGTTACT----- mirL 18 16
-----CCGTGGCTTTCGATTGTTACT----- mirL 20 15
-----CGTGGCTTTCGATTGTTACT----- mirL 19 11
-----CAACCGTGGCTTTCGATTGTT----- mirL 21 11
-----CGTGGCTTTCGATTGTTA----- mirL 18 6
-----CAACCGTGGCTTTCGATTGTTACT----- mirL 23 4
-----CAACCGTGGCTTTCGATTGT----- mirL 20 4
-----CAACCGTGGCTTTCGATTG----- mirL 19 4
-----GTGGCTTTCGATTGTTACTG----- mirL 20 4
-----CCGTGGCTTTCGATTGTTA----- mirL 19 3
-----CGTGGCTTTCGATTGTTACTGT----- mirL 22 2
-----GCAACCGTGGCTTTCGATTGTTACT----- mirL 25 2
-----CCGTGGCTTTCGATTGTT----- mirL 18 1
-----CCGTGGCTTTCGATTGTTACTGT----- mirL 23 1
-----GCAACCGTGGCTTTCGAT----- mirL 18 1
-----GTGGCTTTCGATTGTTACTGTG----- mirL 22 1
-----CTGTGGGAACCGGAGGTA----- loop 18 3
-----TAACAGTCTACAGCCATGGT----- mirR 20 58161
-----TAACAGTCTACAGCCATGGTCG----- mirR 22 52717
-----TAACAGTCTACAGCCATGGTCGC----- mirR 23 38297
-----TAACAGTCTACAGCCATGGTC----- mirR 21 28432
-----AACAGTCTACAGCCATGGTCG----- mirR 21 5287
-----TAACAGTCTACAGCCATGG----- mirR 19 4979
-----AACAGTCTACAGCCATGGT----- mirR 19 4563
-----AACAGTCTACAGCCATGGTCGC----- mirR 22 4138
-----TAACAGTCTACAGCCATGGTCGCC----- mirR 24 2865
-----TAACAGTCTACAGCCATG----- mirR 18 2498
-----AACAGTCTACAGCCATGGTC----- mirR 20 1888
-----ACAGTCTACAGCCATGGTCGC----- mirR 21 566
-----ACAGTCTACAGCCATGGT----- mirR 18 435
-----AACAGTCTACAGCCATGGTCGCC----- mirR 23 424
-----AACAGTCTACAGCCATGG----- mirR 18 274
-----ACAGTCTACAGCCATGGTCGCC----- mirR 22 188
-----ACAGTCTACAGCCATGGTCG----- mirR 20 150
-----ACAGTCTACAGCCATGGTC----- mirR 19 126

```

```

-----ACAGTCTACAGCCATGGTCGCC----- mirR 23 81
-----AACAGTCTACAGCCATGGTCGCC----- mirR 24 79
-----GTAACAGTCTACAGCCATGGT----- mirR 21 30
-----ACAGTCTACAGCCATGGTCGCC----- mirR 24 28
-----GTAACAGTCTACAGCCATGGTC----- mirR 22 20
-----CAGTCTACAGCCATGGTCG----- mirR 19 16
-----CAGTCTACAGCCATGGTC----- mirR 18 13
-----CAGTCTACAGCCATGGTCG----- mirR 20 12
-----GTAACAGTCTACAGCCATGGTCG----- mirR 23 10
-----GTAACAGTCTACAGCCATGGTCG----- mirR 24 9
-----CAGTCTACAGCCATGGTCGCC----- mirR 21 5
-----GGTAACAGTCTACAGCCATGGT----- mirR 22 4
-----AGGTAACAGTCTACAGCCATGGT----- mirR 23 4
-----GTAACAGTCTACAGCCATGG----- mirR 20 3
-----GGTAACAGTCTACAGCCATGGTC----- mirR 23 2
-----GTAACAGTCTACAGCCAT----- mirR 18 2
-----GGTAACAGTCTACAGCCAT----- mirR 19 1
-----AGGTAACAGTCTACAGCCATGGTC----- mirR 24 1
-----GTAACAGTCTACAGCCATG----- mirR 19 1
-----CCCCGCAGCAGCCCACGCTCCCC morR 24 3
-----CCCCGCAGCAGCCCACGCTC--- morR 20 3
-----CCCCGCAGCAGCCCACGCT--- morR 20 2
-----GCCCGCAGCAGCCCACG----- morR 19 1
-----GCCCGCAGCAGCCCAC----- morR 18 1
-----CCCCGCAGCAGCCCACGCTCCC- morR 23 1
-----CCCCGCAGCAGCCCACGCT--- morR 19 1
-----CCCCGCAGCAGCCCACGCTCC-- morR 22 1

```

>mmu-mir-23a

```

CACTGTGCCTCGGACGGCTGGGGTTCTGGGGATGGGATTTGATGCCAGTCACAAATCACATTGCCAGGGATTTCCAAGTACCTGTGCTCTGCCT species len reads
CACTGTGCCTCGGACGGCT----- morL 19 1
- ACTGTGCCTCGGACGGCTG----- morL 19 1
-----GGGGTTCTGGGGATGGGATTT----- mirL 22 73
-----GGGGTTCTGGGGATGGGATT----- mirL 21 39
-----GTTCTGGGGATGGGATTT----- mirL 19 27
-----GGTTCTGGGGATGGGATTT----- mirL 20 27
-----GGGGTTCTGGGGATGGGATTTG----- mirL 23 17
-----GTTCTGGGGATGGGATT----- mirL 18 11
-----GGTTCTGGGGATGGGATT----- mirL 19 9
-----GGGGTTCTGGGGATGGGAT----- mirL 20 7
-----GGGGTTCTGGGGATGGGATTT----- mirL 21 5
-----GTTCTGGGGATGGGATTTG----- mirL 20 4
-----GGGGTTCTGGGGATGGGATTTGA----- mirL 24 3
-----GGGGTTCTGGGGATGGGA----- mirL 19 3
-----GGTTCTGGGGATGGGATTTG----- mirL 21 2
-----GGGGTTCTGGGGATGGGATT----- mirL 20 1

```

```

-----GGGGTTCCTGGGGATGGG----- mirL 18 1
-----GGGTTCTGGGGATGGGA----- mirL 18 1
-----GTTCTCTGGGGATGGGATTTGA----- mirL 21 1
-----TGGGGTTCCTGGGGATGG----- mirL 18 1
-----GGTTCCTGGGGATGGGAT----- mirL 18 1
-----GCTGGGGTTCCTGGGGAT----- mirL 18 1
-----ATCACATTGCCAGGGATTCCA----- mirR 22 79181
-----ATCACATTGCCAGGGATTCC----- mirR 21 65623
-----ATCACATTGCCAGGGATTCCAA----- mirR 23 32783
-----ATCACATTGCCAGGGATTTC----- mirR 20 29016
-----ATCACATTGCCAGGGATTT----- mirR 19 20491
-----ATCACATTGCCAGGGATTCCAAC----- mirR 24 13528
-----AATCACATTGCCAGGGATTCC----- mirR 22 1395
-----ATCACATTGCCAGGGATTCCAAC----- mirR 25 779
-----AATCACATTGCCAGGGATTCCA----- mirR 23 604
-----AATCACATTGCCAGGGATTTC----- mirR 21 487
-----AATCACATTGCCAGGGATTT----- mirR 20 340
-----TCACATTGCCAGGGATTCCAAC----- mirR 23 308
-----TCACATTGCCAGGGATTCCA----- mirR 21 277
-----TCACATTGCCAGGGATTCC----- mirR 20 265
-----AATCACATTGCCAGGGATTCCAA----- mirR 24 231
-----ACATTGCCAGGGATTCCA----- mirR 19 225
-----TCACATTGCCAGGGATTTC----- mirR 19 171
-----ACATTGCCAGGGATTCC----- mirR 18 166
-----ACATTGCCAGGGATTCCAA----- mirR 20 164
-----TCACATTGCCAGGGATTCCAA----- mirR 22 156
-----CACATTGCCAGGGATTCCA----- mirR 20 114
-----TCACATTGCCAGGGATTT----- mirR 18 108
-----CACATTGCCAGGGATTCC----- mirR 19 86
-----AATCACATTGCCAGGGATTCCAAC----- mirR 25 84
-----CACATTGCCAGGGATTCCAA----- mirR 21 77
-----CACATTGCCAGGGATTTC----- mirR 18 50
-----TCACATTGCCAGGGATTCCAAC----- mirR 24 36
-----ACATTGCCAGGGATTCCAAC----- mirR 21 26
-----CACATTGCCAGGGATTCCAAC----- mirR 22 21
-----AATCACATTGCCAGGGATTCCAAC----- mirR 26 7
-----ACATTGCCAGGGATTCCAAC----- mirR 22 3
-----CACATTGCCAGGGATTCCAAC----- mirR 23 3
-----AAATCACATTGCCAGGGATTCC----- mirR 23 2
-----CAAATCACATTGCCAGGGATTTC----- mirR 23 1
-----CACATTGCCAGGGATTCCAAC----- mirR 24 1
-----TGACCCTGTGCTCTGCCT morR 18 1
-----CAACTGACCCTGTGCTCT----- morR 18 1

```

>mmu-mir-149

GCCTCAGGCCAGTGCCAGGCTCTGGCTCCGTGCTTCACTCCCGTGTGTGTCAGGAGGGAGGGACGGGGCGGTGCTGG species len reads

```

GCCCTCAGGCCAGTGCCAGGCT----- morL 23 2
-CCCTCAGGCCAGTGCCCA----- morL 18 1
-----TCTGGCTCCGTGTCTTCACTCCC----- mirL 23 123089
-----TCTGGCTCCGTGTCTTCACTCC----- mirL 22 62875
-----TCTGGCTCCGTGTCTTCACTC----- mirL 21 17808
-----TCTGGCTCCGTGTCTTCACTCCC----- mirL 24 17349
-----TCTGGCTCCGTGTCTTCACTC----- mirL 19 5403
-----TCTGGCTCCGTGTCTTCACT----- mirL 20 4344
-----TCTGGCTCCGTGTCTTCACTCCC----- mirL 25 3099
-----CTGGCTCCGTGTCTTCACTCCC----- mirL 22 2999
-----CTGGCTCCGTGTCTTCACTCC----- mirL 21 1660
-----CTGGCTCCGTGTCTTCACTCCC----- mirL 23 525
-----CTGGCTCCGTGTCTTCACTC----- mirL 20 413
-----GGCTCCGTGTCTTCACTCCC----- mirL 20 219
-----GGCTCCGTGTCTTCACTCC----- mirL 19 155
-----CTGGCTCCGTGTCTTCACT----- mirL 19 124
-----TGGCTCCGTGTCTTCACTCC----- mirL 20 90
-----CTGGCTCCGTGTCTTCACTCCC----- mirL 24 80
-----TGGCTCCGTGTCTTCACTCCC----- mirL 21 77
-----CTGGCTCCGTGTCTTCACT----- mirL 18 46
-----CTCTGGCTCCGTGTCTTCACTCCC----- mirL 24 39
-----GGCTCCGTGTCTTCACTCCC----- mirL 21 30
-----GGCTCCGTGTCTTCACTC----- mirL 18 29
-----CTCTGGCTCCGTGTCTTCACTCC----- mirL 23 25
-----TGGCTCCGTGTCTTCACTC----- mirL 19 20
-----TGGCTCCGTGTCTTCACTCCC----- mirL 22 14
-----TGGCTCCGTGTCTTCACT----- mirL 18 9
-----GGCTCCGTGTCTTCACTCCC----- mirL 22 7
-----CTCTGGCTCCGTGTCTTCACTCCC----- mirL 25 6
-----CTCTGGCTCCGTGTCTTCACTC----- mirL 22 6
-----GGCTCTGGCTCCGTGTCTTCACTCC----- mirL 25 3
-----CTCTGGCTCCGTGTCTTCACT----- mirL 21 3
-----GCTCTGGCTCCGTGTCTTCACTCCC----- mirL 25 2
-----TGGCTCCGTGTCTTCACTCCC----- mirL 23 2
-----TGGCTCCGTGTCTTCACTCCC----- mirL 24 1
-----GCTCTGGCTCCGTGTCTTCTC----- mirL 19 1
-----GGCTCTGGCTCCGTGTCTTCACTC----- mirL 24 1
-----CTCTGGCTCCGTGTCTTCA----- mirL 19 1
-----CTCTGGCTCCGTGTCTTCTC----- mirL 18 1
-----GTGTTTGTCCGAGGAGGG----- loop 18 3
-----TTTGTCCGAGGAGGGAGG----- loop 18 1
-----AGGGAGGGACGGGGCGGTGC----- mirR 21 36
-----GAGGGAGGGACGGGGCGGTGC----- mirR 22 22
-----AGGGAGGGACGGGGCGGTG----- mirR 20 13
-----GAGGGAGGGACGGGGCGGTGCT----- mirR 23 8
-----AGGGAGGGACGGGGCGG----- mirR 18 6

```



```

-----AGGGAGGGACGGGGGCGGTGCT-- mirR 22 4
-----AGGGAGGGACGGGGGCGGT----- mirR 19 4
-----GAGGGAGGGACGGGGGCGGTG---- mirR 21 4
-----GAGGGAGGGACGGGGGCGGTGCTGG mirR 25 3
-----GGAGGGACGGGGGCGGTGC--- mirR 19 3
-----GAGGGAGGGACGGGGGCGGT----- mirR 20 2
-----GAGGGAGGGACGGGGGCGG----- mirR 19 2
-----GGGAGGGACGGGGGCGGTG---- mirR 19 2
-----GGAGGGAGGGACGGGGGCG----- mirR 19 1
-----GGAGGGAGGGACGGGGGC----- mirR 18 1
-----GGGAGGGAGGGACGGGGG----- mirR 18 1
-----GGAGGGACGGGGGCGGTG---- mirR 18 1
-----GGAGGGAGGGACGGGGGCG----- mirR 20 1
-----GAGGGAGGGACGGGGGCG----- mirR 18 1

```

>mmu-mir-7a-2

| Species | len | reads |
|---------|-----|-------|
| morL    | 18  | 2     |
| morL    | 18  | 1     |
| mirL    | 24  | 95062 |
| mirL    | 23  | 54861 |
| mirL    | 25  | 11885 |
| mirL    | 22  | 11039 |
| mirL    | 20  | 7916  |
| mirL    | 23  | 4501  |
| mirL    | 21  | 3513  |
| mirL    | 19  | 2698  |
| mirL    | 22  | 2316  |
| mirL    | 21  | 469   |
| mirL    | 24  | 139   |
| mirL    | 20  | 136   |
| mirL    | 19  | 117   |
| mirL    | 25  | 47    |
| mirL    | 22  | 32    |
| mirL    | 21  | 32    |
| mirL    | 25  | 31    |
| mirL    | 20  | 29    |
| mirL    | 21  | 26    |
| mirL    | 19  | 23    |
| mirL    | 24  | 8     |
| mirL    | 20  | 8     |
| mirL    | 18  | 6     |
| mirL    | 18  | 5     |
| mirL    | 19  | 5     |
| mirL    | 21  | 3     |
| mirL    | 23  | 3     |

```

-----TTGGAAGACTAGTGATTTTGT----- mirL 22 2
-----GTTTGGGAAGACTAGTGATTTTG----- mirL 22 2
-----GAAGACTAGTGATTTTGTGTTG----- mirL 23 2
-----TTGGAAGACTAGTGATTTTG----- mirL 20 2
-----TTTGGGAAGACTAGTGATTTTGTG----- mirL 24 2
-----AAGACTAGTGATTTTGTGTTG----- mirL 22 1
-----GTTTGGGAAGACTAGTGATTTTGTGTT----- mirL 26 1
-----AAGACTAGTGATTTTGTGTTGTG----- mirL 24 1
-----GTTTGGGAAGACTAGTGATTTTGTGTT----- mirL 27 1
-----TTGGAAGACTAGTGATTT----- mirL 18 1
-----TTTGGGAAGACTAGTGATT----- mirL 18 1
-----TTTGGGAAGACTAGTGATTTGTTGTT----- mirL 26 1
-----TGTCTCTGTATCCAACA----- loop 18 3
-----TGTGTCTCTGTATCCAAC----- loop 18 1
-----CAACAAGTCCCAGTCTGCCACA----- mirR 22 14010
-----CAACAAGTCCCAGTCTGCCACAT----- mirR 23 4551
-----CAACAAGTCCCAGTCTGCCAC----- mirR 21 3770
-----CAACAAGTCCCAGTCTGCCA----- mirR 20 1279
-----AACAAGTCCCAGTCTGCCACA----- mirR 21 499
-----CAACAAGTCCCAGTCTGCC----- mirR 19 420
-----CAACAAGTCCCAGTCTGCCACATG----- mirR 24 331
-----CAACAAGTCCCAGTCTGC----- mirR 18 289
-----AACAAGTCCCAGTCTGCCACAT----- mirR 22 218
-----ACAACAAGTCCCAGTCTGCCAC----- mirR 22 114
-----AACAAGTCCCAGTCTGCCAC----- mirR 20 109
-----ACAACAAGTCCCAGTCTGCCACA----- mirR 23 77
-----ACAACAAGTCCCAGTCTGCCA----- mirR 21 59
-----AACAAGTCCCAGTCTGCCA----- mirR 19 52
-----AACAAGTCCCAGTCTGCCACATG----- mirR 23 34
-----ACAACAAGTCCCAGTCTGCC----- mirR 20 15
-----ACAACAAGTCCCAGTCTGCCACAT----- mirR 24 14
-----AACAAGTCCCAGTCTGCC----- mirR 18 9
-----ACAACAAGTCCCAGTCTGC----- mirR 19 7
-----ACAAGTCCCAGTCTGCCACA----- mirR 20 4
-----AACAAGTCCCAGTCTGCCACATGG----- mirR 24 4
-----AACAACAAGTCCCAGTCTGCCACA----- mirR 24 3
-----CAAGTCCCAGTCTGCCACA----- mirR 19 2
-----ACAAGTCCCAGTCTGCCACAT----- mirR 21 2
-----ACAACAAGTCCCAGTCTGCCACATG----- mirR 25 2
-----CAAGTCCCAGTCTGCCAC----- mirR 18 1
-----ACAAGTCCCAGTCTGCCAC----- mirR 19 1
-----ACAAGTCCCAGTCTGCCACATG----- mirR 22 1
-----TGGTGCTGGTCATTTCCAG morR 18 2

```

>mmu-mir-101a

GACTGACAGGCTGCCTGGCTCAGTTATCACAGTGCTGATGCTGCCATTCTAAAGGTACAGTACTGTGATAACTGAAGGATGGCAGCCATCTTGCCCTTCC species len reads

```

--CTGACAGGCTGCCCTGGCT----- morL 19 1
GACTGACAGGCTGCCCTGGCT----- morL 21 1
-----TCAGTTATCACAGTGCTGATGC----- mirL 22 876
-----CAGTTATCACAGTGCTGATGC----- mirL 21 761
-----CAGTTATCACAGTGCTGATGCT----- mirL 22 327
-----CAGTTATCACAGTGCTGATG----- mirL 20 89
-----TCAGTTATCACAGTGCTGATG----- mirL 21 72
-----TCAGTTATCACAGTGCTGATGCT----- mirL 23 71
-----CAGTTATCACAGTGCTGAT----- mirL 19 59
-----TCAGTTATCACAGTGCTGAT----- mirL 20 57
-----CAGTTATCACAGTGCTGATGCTG----- mirL 23 50
-----AGTTATCACAGTGCTGATGC----- mirL 20 33
-----TCAGTTATCACAGTGCTG----- mirL 18 25
-----GTTATCACAGTGCTGATGC----- mirL 19 19
-----TCAGTTATCACAGTGCTGA----- mirL 19 18
-----CAGTTATCACAGTGCTGA----- mirL 18 14
-----AGTTATCACAGTGCTGATG----- mirL 19 5
-----CAGTTATCACAGTGCTGATGCTGT----- mirL 24 5
-----TCAGTTATCACAGTGCTGATGCTG----- mirL 24 3
-----AGTTATCACAGTGCTGATGCT----- mirL 21 3
-----GGCTCAGTTATCACAGTGCTGAT----- mirL 23 1
-----GTTATCACAGTGCTGATGCT----- mirL 20 1
-----GTTATCACAGTGCTGATG----- mirL 18 1
-----TGCTGTCCATTCTAAAG----- loop 18 1
-----GTACAGTACTGTGATAACTGA----- mirR 21 85299
-----GTACAGTACTGTGATAACTGAA----- mirR 22 42916
-----TACAGTACTGTGATAACTGA----- mirR 20 18040
-----GTACAGTACTGTGATAACTGAAG----- mirR 23 17505
-----TACAGTACTGTGATAACTGAAG----- mirR 22 16491
-----TACAGTACTGTGATAACTGAA----- mirR 21 9457
-----TACAGTACTGTGATAACTGAAG----- mirR 23 6236
-----GTACAGTACTGTGATAACTG----- mirR 20 5198
-----GTACAGTACTGTGATAACTGAAG----- mirR 24 4949
-----GTACAGTACTGTGATAAC----- mirR 18 3426
-----GTACAGTACTGTGATAACT----- mirR 19 2432
-----TACAGTACTGTGATAACTG----- mirR 19 1111
-----TACAGTACTGTGATAACTGAAGGA----- mirR 24 933
-----ACAGTACTGTGATAACTGAAG----- mirR 21 711
-----ACAGTACTGTGATAACTGA----- mirR 19 637
-----ACAGTACTGTGATAACTGAA----- mirR 20 481
-----TACAGTACTGTGATAACT----- mirR 18 396
-----ACAGTACTGTGATAACTGAAG----- mirR 22 345
-----ACAGTACTGTGATAACTGAAGGA----- mirR 23 84
-----GGTACAGTACTGTGATAACTGA----- mirR 22 69
-----ACAGTACTGTGATAACTG----- mirR 18 41
-----CAGTACTGTGATAACTGAAGGA----- mirR 22 33

```

```

-----CAGTACTGTGATAACTGA----- mirR 18 31
-----CAGTACTGTGATAACTGAAGG----- mirR 21 25
-----GGTACAGTACTGTGATAACTGAA----- mirR 23 24
-----CAGTACTGTGATAACTGAA----- mirR 19 20
-----CAGTACTGTGATAACTGAAG----- mirR 20 18
-----AGGTACAGTACTGTGATAACTGA----- mirR 23 13
-----GGTACAGTACTGTGATAACTGAAG----- mirR 24 5
-----CAGTACTGTGATAACTGAAGGAT----- mirR 23 4
-----AGGTACAGTACTGTGATAACTGAA----- mirR 24 4
-----AGGTACAGTACTGTGATAACTGAAG----- mirR 25 4
-----ACAGTACTGTGATAACTGAAGGAT----- mirR 24 3
-----GGTACAGTACTGTGATAAC----- mirR 19 3
-----AGGTACAGTACTGTGATAAC----- mirR 20 2
-----GGTACAGTACTGTGATAACTGAAGG----- mirR 25 2
-----GGTACAGTACTGTGATAACTG----- mirR 21 1
-----AGGTACAGTACTGTGATAACT----- mirR 21 1
-----AAGGTACAGTACTGTGATAACTGAA----- mirR 25 1
-----GGTACAGTACTGTGATAACT----- mirR 20 1
-----AGGTACAGTACTGTGATAA----- mirR 19 1
-----AGGTACAGTACTGTGATAACTG----- mirR 22 1
-----GATGGCAGCCATCTTGCCTTCC morR 22 1

>mmu-mir-495
AGCTCAGCCGTGGTACCTGAAAAGAAGTTGCCCATGTTATTTTTCGCTTTTATTGTGACGAAACAACATGGTGCACTTCTTTTTCGATATCAAATCTCAC species len reads
----AGCCGTGGTACCTGAAAA----- morL 18 18
----CAGCCGTGGTACCTGAAAA----- morL 19 7
---TCAGCCGTGGTACCTGAAAA----- morL 20 4
----CAGCCGTGGTACCTGAAAAG----- morL 20 3
----AGCCGTGGTACCTGAAAAG----- morL 19 3
--CTCAGCCGTGGTACCTGAAAA----- morL 21 2
-GCTCAGCCGTGGTACCTGAAAA----- morL 22 1
AGCTCAGCCGTGGTACCTGAAAA----- morL 23 1
----CGTGGTACCTGAAAAGAA----- morL 18 1
----CAGCCGTGGTACCTGAAA----- morL 18 1
-----GAAGTTGCCCATGTTATTTTTTC----- mirL 22 92
-----GAAGTTGCCCATGTTATTTTTTCG----- mirL 23 77
-----GAAGTTGCCCATGTTATTTTT----- mirL 21 53
-----GAAGTTGCCCATGTTATTTTTTCGC----- mirL 24 26
-----GAAGTTGCCCATGTTATTTTT----- mirL 20 15
-----GAAGTTGCCCATGTTATTT----- mirL 19 11
-----GAAGTTGCCCATGTTATT----- mirL 18 7
-----AAGTTGCCCATGTTATTTTT----- mirL 20 2
-----AAGTTGCCCATGTTATTTTTTCGC----- mirL 23 1
-----AAGTTGCCCATGTTATTTTTTCG----- mirL 22 1
-----AAGTTGCCCATGTTATTT----- mirL 18 1
-----GTTGCCCATGTTATTTTT----- mirL 18 1

```

```

-----AAGTTGCCCATGTTATTTTTTC----- mirL 21 1
-----TTCGCTTTTATTTGTGAC----- loop 18 1
-----AAACAAACATGGTGCACCTTCTT----- mirR 22 131056
-----AAACAAACATGGTGCACCTTCTT----- mirR 23 23207
-----AAACAAACATGGTGCACCTTCT----- mirR 21 14640
-----AACAAACATGGTGCACCTTCTTT----- mirR 22 11529
-----AAACAAACATGGTGCACCTTC----- mirR 20 9262
-----AACAAACATGGTGCACCTTCTT----- mirR 21 8683
-----AAACAAACATGGTGCACCTT----- mirR 19 4940
-----AAACAAACATGGTGCACCTTCTTTT----- mirR 24 3530
-----AACAAACATGGTGCACCTTCTTTT----- mirR 23 2224
-----AACAAACATGGTGCACCTTC----- mirR 19 2175
-----AACAAACATGGTGCACCTTCT----- mirR 20 1600
-----AACAAACATGGTGCACCT----- mirR 18 1248
-----ACAAACATGGTGCACCTTCTTTT----- mirR 22 735
-----AACAAACATGGTGCACCTT----- mirR 18 637
-----ACAAACATGGTGCACCTTCTTT----- mirR 21 536
-----ACAAACATGGTGCACCTTCTT----- mirR 20 462
-----AACAAACATGGTGCACCTTCTTTT----- mirR 24 385
-----ACAAACATGGTGCACCTTCTTTT----- mirR 23 209
-----ACAAACATGGTGCACCTTC----- mirR 18 138
-----ACAAACATGGTGCACCTTCT----- mirR 19 135
-----GAAACAAACATGGTGCACCTTCTT----- mirR 23 50
-----CAAACATGGTGCACCTTCTT----- mirR 19 39
-----CAAACATGGTGCACCTTCTTTT----- mirR 21 38
-----ACAAACATGGTGCACCTTCTTTTTC----- mirR 24 37
-----CAAACATGGTGCACCTTCTTT----- mirR 20 29
-----CAAACATGGTGCACCTTCTTTT----- mirR 22 25
-----CAAACATGGTGCACCTTCT----- mirR 18 14
-----CGAAACAAACATGGTGCACCTTCTT----- mirR 24 10
-----CAAACATGGTGCACCTTCTTTTTC----- mirR 23 5
-----GAAACAAACATGGTGCACCTTCTT----- mirR 24 5
-----GAAACAAACATGGTGCACCTTCT----- mirR 22 5
-----GAAACAAACATGGTGCACCTTC----- mirR 21 3
-----ACGAAACAAACATGGTGCACCTTCTT----- mirR 25 2
-----CGAAACAAACATGGTGCACCTTC----- mirR 22 2
-----ACGAAACAAACATGGTGCACCTTC----- mirR 23 2
-----CGAAACAAACATGGTGCACCTTCT----- mirR 23 1
-----CGAAACAAACATGGTGCACCTTCTTTT----- mirR 26 1
-----GAAACAAACATGGTGCAC----- mirR 18 1
-----ACGAAACAAACATGGTGC----- mirR 18 1
-----ACGAAACAAACATGGTGCACCTTCTT----- mirR 26 1
-----TTCGATATCAAATCTCAC morR 18 1

```

>mmu-mir-150

GCAGAGGACTCTTCTCAATGCCCTGTCTCCCAACCCTTGACCAGTGCTGTGCCTCAGACCCTGGTACAGGCTGGGGATAGGGACTTGGGAACCCAGCAGCAACAA species len reads

```

-----ACTCTTCTCAATGCCCTG----- morL 18 284
-----GACTCTTCTCAATGCCCTG----- morL 19 63
-----ACTCTTCTCAATGCCCTGT----- morL 19 37
-----GACTCTTCTCAATGCCCTGT----- morL 20 3
-----GGACTCTTCTCAATGCC----- morL 18 1
-----CTCTTCTCAATGCCCTGTC----- morL 19 1
---GAGGACTCTTCTCAATGCCCTG----- morL 22 1
-----ACTCTTCTCAATGCCCTGTC----- morL 20 1
-----GGACTCTTCTCAATGCCCTG----- morL 20 1
-----CTCTTCTCAATGCCCTGT----- morL 18 1
-----ACTCTTCTCAATGCCCTGTCT----- morL 21 1
GCAGAGGACTCTTCTCAATGCCCTG----- morL 25 1
-----TCTCCCAACCCTTGTACCAGTGC----- mirL 23 84130
-----TCTCCCAACCCTTGTACCAGTG----- mirL 22 52140
-----TCTCCCAACCCTTGTACCAGT----- mirL 21 29314
-----TCTCCCAACCCTTGTACCAG----- mirL 20 11671
-----TCTCCCAACCCTTGTACCAGTGCT----- mirL 24 6446
-----TCTCCCAACCCTTGTACCA----- mirL 19 6257
-----TCTCCCAACCCTTGTACC----- mirL 18 5250
-----CTCCCAACCCTTGTACCAGTG----- mirL 21 1430
-----CTCCCAACCCTTGTACCAGTGC----- mirL 22 1248
-----CTCCCAACCCTTGTACCAGT----- mirL 20 592
-----CTCCCAACCCTTGTACCAG----- mirL 19 283
-----CTCCCAACCCTTGTACCAGTGCT----- mirL 23 145
-----CTCCCAACCCTTGTACCA----- mirL 18 82
-----TCCCAACCCTTGTACCAGTG----- mirL 20 39
-----TCCCAACCCTTGTACCAGTGC----- mirL 21 27
-----CCCAACCCTTGTACCAGTG----- mirL 19 25
-----TCCCAACCCTTGTACCAGT----- mirL 19 16
-----CTCCCAACCCTTGTACCAGTGCTG----- mirL 24 13
-----TGTCTCCCAACCCTTGTACCAGT----- mirL 23 11
-----GTCTCCCAACCCTTGTACCAGTGC----- mirL 24 9
-----TCCCAACCCTTGTACCAG----- mirL 18 9
-----TCCCAACCCTTGTACCAGTGCT----- mirL 22 8
-----TGTCTCCCAACCCTTGTACCAG----- mirL 22 8
-----CCCAACCCTTGTACCAGT----- mirL 18 8
-----TGTCTCCCAACCCTTGTACCAGTG----- mirL 24 7
-----TGTCTCCCAACCCTTGTACCAGTGC----- mirL 25 6
-----TGTCTCCCAACCCTTGTACCA----- mirL 21 6
-----CCCAACCCTTGTACCAGTGC----- mirL 20 6
-----GTCTCCCAACCCTTGTACCAGTG----- mirL 23 5
-----GTCTCCCAACCCTTGTACCAGT----- mirL 22 4
-----GTCTCCCAACCCTTGTACCAG----- mirL 21 3
-----TGTCTCCCAACCCTTGTACC----- mirL 20 3
-----TGTCTCCCAACCCTTGTAC----- mirL 19 2
-----GTCTCCCAACCCTTGTAC----- mirL 18 1

```

```

-----TCCCAACCCTTGTACCAGTGCTG----- mirL 23 1
-----GTCTCCCAACCCTTGTACCAGTGCTGT----- mirL 27 1
-----GTCTCCCAACCCTTGTACCAGTGCT----- mirL 25 1
-----CTGGTACAGGCCTGGGGGATAG----- mirR 22 145
-----CTGGTACAGGCCTGGGGGA----- mirR 19 40
-----CTGGTACAGGCCTGGGGGATAG----- mirR 23 23
-----CTGGTACAGGCCTGGGGGATA----- mirR 21 23
-----GTACAGGCCTGGGGGATAG----- mirR 19 21
-----GGTACAGGCCTGGGGGATAG----- mirR 20 18
-----CCTGGTACAGGCCTGGGGGA----- mirR 20 17
-----CTGGTACAGGCCTGGGGG----- mirR 18 16
-----CTGGTACAGGCCTGGGGGAT----- mirR 20 15
-----TGGTACAGGCCTGGGGGATAG----- mirR 21 8
-----CCTGGTACAGGCCTGGGGG----- mirR 19 7
-----CCTGGTACAGGCCTGGGGGAT----- mirR 21 5
-----CTGGTACAGGCCTGGGGGATAGG----- mirR 24 4
-----GTACAGGCCTGGGGGATAG----- mirR 20 3
-----CCTGGTACAGGCCTGGGGGATAG----- mirR 23 2
-----CCTGGTACAGGCCTGGGGGATAG----- mirR 24 1
-----CCCTGGTACAGGCCTGGGGG----- mirR 20 1
-----GGTACAGGCCTGGGGGATA----- mirR 19 1
-----CCTGGTACAGGCCTGGGGGATA----- mirR 22 1
-----GGGACTTGGGAACCCAGC----- morR 19 16
-----GGGACTTGGGAACCCAGCAG----- morR 21 16
-----GGGACTTGGGAACCCAGCA----- morR 20 13
-----TAGGGACTTGGGAACCCC----- morR 18 8
-----GGGACTTGGGAACCCAGCAGCAAC----- morR 25 5
-----GGGACTTGGGAACCCAG----- morR 18 4
-----GGGACTTGGGAACCCAGCAGCAACAA----- morR 27 3
-----GGGACTTGGGAACCCAGCAGCA----- morR 23 3
-----GGACTTGGGAACCCAGCAG----- morR 20 1
-----AGGGACTTGGGAACCCAGCA----- morR 21 1
-----GGACTTGGGAACCCAGCA----- morR 19 1

```

>mmu-mir-30d

```

CTTGCTGTCAGAAAGTCTGTGCTGTGTAACATCCCCGACTGGAAGCTGTAAGCCACAGCCAAGCTTTCAGTCAGATGTTTGCTGCTA species len reads
-----TCAGAAAGTCTGTGCTGT----- morL 19 1
-----CAGAAAGTCTGTGCTGT----- morL 18 1
CTTGCTGTCAGAAAGTCTGT----- morL 20 1
-----TGTCAGAAAGTCTGTGTC----- morL 18 1
-----TGTAACATCCCCGACTGGAAGC----- mirL 23 69744
-----TGTAACATCCCCGACTGGAAG----- mirL 22 35901
-----TGTAACATCCCCGACTGGAAGCT----- mirL 24 27598
-----TGTAACATCCCCGACTGGAA----- mirL 21 24638
-----TGTAACATCCCCGACTGG----- mirL 19 13433
-----TGTAACATCCCCGACTGGA----- mirL 20 11633

```

```

-----TGTAACATCCCCGACTGGAAGCTG----- mirL 25 8370
-----GTAACATCCCCGACTGGAAGC----- mirL 22 1318
-----GTAACATCCCCGACTGGAAG----- mirL 21 1171
-----GTAACATCCCCGACTGGAAGCT----- mirL 23 888
-----GTAACATCCCCGACTGGAA----- mirL 20 615
-----GTAACATCCCCGACTGGAAGCTG----- mirL 24 293
-----GTAACATCCCCGACTGG----- mirL 18 255
-----GTAACATCCCCGACTGGA----- mirL 19 196
-----TAAACATCCCCGACTGGAAG----- mirL 20 37
-----AAACATCCCCGACTGGAAG----- mirL 19 34
-----TAAACATCCCCGACTGGAAGCT----- mirL 22 26
-----AAACATCCCCGACTGGAAGCT----- mirL 21 23
-----CTGTAACATCCCCGACTGGAAGC----- mirL 24 20
-----AAACATCCCCGACTGGAAGC----- mirL 20 20
-----AAACATCCCCGACTGGAA----- mirL 18 18
-----CTGTAACATCCCCGACTGGAA----- mirL 22 15
-----TAAACATCCCCGACTGGAAGC----- mirL 21 14
-----CTGTAACATCCCCGACTGGAAG----- mirL 23 10
-----TAAACATCCCCGACTGGAA----- mirL 19 9
-----TAAACATCCCCGACTGGA----- mirL 18 7
-----AAACATCCCCGACTGGAAGCTG----- mirL 22 5
-----CTGTAACATCCCCGACTGG----- mirL 20 4
-----CTGTAACATCCCCGACTGGAAGCT----- mirL 25 3
-----CTGTAACATCCCCGACTGGAAGCTGT----- mirL 27 3
-----AAACATCCCCGACTGGAAGCTGT----- mirL 23 3
-----CTGTAACATCCCCGACTGGA----- mirL 21 2
-----TAAACATCCCCGACTGGAAGCTGT----- mirL 24 1
-----GTCTGTAACATCCCCGACTGGAAGCT----- mirL 27 1
-----GTCTGTAACATCCCCGACTGGAAG----- mirL 25 1
-----GTCTGTAACATCCCCGACTGG----- mirL 22 1
-----CTGTAAGCCACAGCCAAG----- loop 18 1
-----CTTTCAGTCAGATGTTTGCTGC-- mirR 22 101
-----CTTTCAGTCAGATGTTTGC----- mirR 19 34
-----CTTTCAGTCAGATGTTTG----- mirR 18 33
-----CTTTCAGTCAGATGTTTGCT----- mirR 20 31
-----CTTTCAGTCAGATGTTTGCTGCT----- mirR 23 25
-----CTTTCAGTCAGATGTTTGCTG----- mirR 21 18
-----TTTCAGTCAGATGTTTGCTGC-- mirR 21 16
-----TCAGTCAGATGTTTGCTGC-- mirR 19 13
-----GCTTTCAGTCAGATGTTT----- mirR 18 9
-----CTTTCAGTCAGATGTTTGCTGCTA mirR 24 4
-----TTCAGTCAGATGTTTGCTGC-- mirR 20 3
-----GCTTTCAGTCAGATGTTTG----- mirR 19 2
-----TTCAGTCAGATGTTTGCT----- mirR 18 1
-----TTTCAGTCAGATGTTTGCT----- mirR 19 1
-----TTTCAGTCAGATGTTTGC----- mirR 18 1

```



>mmu-mir-1249

| sequence                                                                                                | species | len | reads |
|---------------------------------------------------------------------------------------------------------|---------|-----|-------|
| GATTCTTGTTTGCCTGCGTGGGGAGGAGGGAGGGGATGGGCCAAGTTCCCTATGCCTGGAACGCCCTTCCCCCCTTCTTACCTGGCGAACTCCTACTCGTCCT | morL    | 18  | 3     |
| ---CTTGTTTGCCTGCGTGGGGAGG---                                                                            | morL    | 18  | 2     |
| ---TCTTGTTTGCCTGCGTGGGGAG---                                                                            | morL    | 18  | 2     |
| GATTCTTGTTTGCCTGCGTGGGGAG---                                                                            | morL    | 20  | 1     |
| --TTCTTGTTTGCCTGCGTGGGGAG---                                                                            | morL    | 18  | 1     |
| -----AGGAGGGAGGGGATGGGCCAAGTTC-----                                                                     | mirL    | 25  | 18    |
| -----AGGAGGGAGGGGATGGGCCA-----                                                                          | mirL    | 20  | 4     |
| -----AGGAGGGAGGGGATGGGCCAAGTTC-----                                                                     | mirL    | 26  | 3     |
| -----AGGAGGGAGGGGATGGGC-----                                                                            | mirL    | 18  | 3     |
| -----GGAGGAGGGAGGGGATGG-----                                                                            | mirL    | 18  | 1     |
| -----AGGAGGGAGGGGATGGGCC-----                                                                           | mirL    | 19  | 1     |
| -----GGAGGAGGGGATGGGCCAA-----                                                                           | mirL    | 20  | 1     |
| -----ACGCCCTTCCCCCCTTCTTCA-----                                                                         | mirR    | 22  | 71342 |
| -----ACGCCCTTCCCCCCTTCTTCA-----                                                                         | mirR    | 23  | 50819 |
| -----ACGCCCTTCCCCCCTTCTTCA-----                                                                         | mirR    | 21  | 36688 |
| -----ACGCCCTTCCCCCCTTCTTCA-----                                                                         | mirR    | 20  | 17475 |
| -----ACGCCCTTCCCCCCTTCTTCA-----                                                                         | mirR    | 19  | 5164  |
| -----ACGCCCTTCCCCCCTTCTTCA-----                                                                         | mirR    | 18  | 4331  |
| -----ACGCCCTTCCCCCCTTCTTCA-----                                                                         | mirR    | 24  | 1417  |
| -----AACGCCCTTCCCCCCTTCTTCA-----                                                                        | mirR    | 22  | 292   |
| -----AACGCCCTTCCCCCCTTCTTCA-----                                                                        | mirR    | 23  | 178   |
| -----AACGCCCTTCCCCCCTTCTTCA-----                                                                        | mirR    | 21  | 155   |
| -----AACGCCCTTCCCCCCTTCTTCA-----                                                                        | mirR    | 20  | 55    |
| -----CGCCCTTCCCCCCTTCTTCA-----                                                                          | mirR    | 21  | 54    |
| -----AACGCCCTTCCCCCCTTCTTCA-----                                                                        | mirR    | 19  | 52    |
| -----AACGCCCTTCCCCCCTTCTTCA-----                                                                        | mirR    | 24  | 35    |
| -----AACGCCCTTCCCCCCTTCTTCA-----                                                                        | mirR    | 18  | 20    |
| -----CCCTTCCCCCCTTCTTCA-----                                                                            | mirR    | 19  | 17    |
| -----CGCCCTTCCCCCCTTCTTCA-----                                                                          | mirR    | 20  | 15    |
| -----GCCCTTCCCCCCTTCTTCA-----                                                                           | mirR    | 20  | 14    |
| -----GCCCTTCCCCCCTTCTTCA-----                                                                           | mirR    | 19  | 12    |
| -----GCCCTTCCCCCCTTCTTCA-----                                                                           | mirR    | 21  | 9     |
| -----CCCTTCCCCCCTTCTTCA-----                                                                            | mirR    | 18  | 7     |
| -----CGCCCTTCCCCCCTTCTTCA-----                                                                          | mirR    | 19  | 7     |
| -----CGCCCTTCCCCCCTTCTTCA-----                                                                          | mirR    | 22  | 5     |
| -----CCCTTCCCCCCTTCTTCA-----                                                                            | mirR    | 20  | 4     |
| -----GGAACGCCCTTCCCCCCTTCTTCA-----                                                                      | mirR    | 22  | 3     |
| -----CGCCCTTCCCCCCTTCTTCA-----                                                                          | mirR    | 23  | 2     |
| -----GCCCTTCCCCCCTTCTTCA-----                                                                           | mirR    | 18  | 2     |
| -----GGAACGCCCTTCCCCCCTTCTTCA-----                                                                      | mirR    | 25  | 2     |
| -----CGCCCTTCCCCCCTTCTTCA-----                                                                          | mirR    | 18  | 2     |
| -----GGAACGCCCTTCCCCCCTTCTTCA-----                                                                      | mirR    | 18  | 2     |
| -----GAACGCCCTTCCCCCCTTCTTCA-----                                                                       | mirR    | 18  | 2     |
| -----GGAACGCCCTTCCCCCCTTCTTCA-----                                                                      | mirR    | 21  | 1     |

```

-----GAACGCCCTTCCCCCCTTCTTC----- mirR 23 1
-----GGAACGCCCTTCCCCCCTT----- mirR 20 1
-----GGAACGCCCTTCCCCCCTTCTT----- mirR 23 1
-----TCACCTGGCGAACTCCTA----- morR 18 1
-----GGCGAACTCCTACTCGTCT----- morR 20 1

```

>mmu-mir-30b

| Sequence                                                                                                | species | len | reads  |
|---------------------------------------------------------------------------------------------------------|---------|-----|--------|
| TCTCTAAGCCAAGTTTCAGTTCATGTAAACATCCTACACTCAGCTGTACATACATGCGTTGGCTGGGATGTGGATGTTTACGTCAGCTGTCTTGGAGTATCCA | morL    | 20  | 3      |
| ---CTAAGCCAAGTTTCAGTTC---                                                                               | morL    | 22  | 2      |
| -CTCTAAGCCAAGTTTCAGTTC-                                                                                 | morL    | 23  | 1      |
| TCTCTAAGCCAAGTTTCAGTTC-                                                                                 | morL    | 21  | 1      |
| --TCTAAGCCAAGTTTCAGTTC-                                                                                 | morL    | 18  | 1      |
| ---CCAAGTTTCAGTTCATGT---                                                                                | morL    | 18  | 1      |
| ---CTAAGCCAAGTTTCAGT---                                                                                 | mirL    | 22  | 114697 |
| -----TGTAACATCCTACACTCAGCT-----                                                                         | mirL    | 21  | 23655  |
| -----TGTAACATCCTACACTCAGC-----                                                                          | mirL    | 23  | 18539  |
| -----TGTAACATCCTACACTCAGCTG-----                                                                        | mirL    | 20  | 6357   |
| -----TGTAACATCCTACACTCAG-----                                                                           | mirL    | 21  | 5776   |
| -----TGTAACATCCTACACTCAGCTGTC-----                                                                      | mirL    | 25  | 5183   |
| -----TGTAACATCCTACACTCA-----                                                                            | mirL    | 19  | 4652   |
| -----TGTAACATCCTACACTCAGCTGT-----                                                                       | mirL    | 24  | 2907   |
| -----TGTAACATCCTACACTCAGCTG-----                                                                        | mirL    | 22  | 1099   |
| -----GTAACATCCTACACTCAGC-----                                                                           | mirL    | 20  | 913    |
| -----GTAACATCCTACACTCAG-----                                                                            | mirL    | 19  | 316    |
| -----GTAACATCCTACACTCAGCTGTC-----                                                                       | mirL    | 24  | 255    |
| -----GTAACATCCTACACTCA-----                                                                             | mirL    | 18  | 248    |
| -----GTAACATCCTACACTCAGCTGT-----                                                                        | mirL    | 23  | 181    |
| -----AAACATCCTACACTCAGCT-----                                                                           | mirL    | 19  | 57     |
| -----TAAACATCCTACACTCAGCT-----                                                                          | mirL    | 20  | 46     |
| -----ATGTAAACATCCTACACTCAGCT-----                                                                       | mirL    | 23  | 37     |
| -----AAACATCCTACACTCAGC-----                                                                            | mirL    | 18  | 17     |
| -----TAAACATCCTACACTCAGC-----                                                                           | mirL    | 19  | 15     |
| -----ATGTAAACATCCTACACTCAGC-----                                                                        | mirL    | 22  | 14     |
| -----ATGTAAACATCCTACACTCA-----                                                                          | mirL    | 20  | 9      |
| -----TAAACATCCTACACTCAGCTG-----                                                                         | mirL    | 21  | 8      |
| -----ATGTAAACATCCTACACTCAGCTG-----                                                                      | mirL    | 24  | 8      |
| -----ATGTAAACATCCTACACTC-----                                                                           | mirL    | 19  | 7      |
| -----AAACATCCTACACTCAGCTG-----                                                                          | mirL    | 20  | 7      |
| -----ATGTAAACATCCTACACTCAG-----                                                                         | mirL    | 21  | 4      |
| -----AAACATCCTACACTCAGCTGTC-----                                                                        | mirL    | 22  | 3      |
| -----TAAACATCCTACACTCAGCTGTC-----                                                                       | mirL    | 23  | 3      |
| -----TAAACATCCTACACTCAG-----                                                                            | mirL    | 18  | 2      |
| -----TCATGTAAACATCCTACACTCAG-----                                                                       | mirL    | 19  | 2      |
| -----ATGTAAACATCCTACACTCAGCTGT-----                                                                     | mirL    | 25  | 2      |
| -----TCATGTAAACATCCTACACTCAGCT-----                                                                     | mirL    | 25  | 2      |

```

-----CATGTAAACATCCTACACTCAGCT----- mirL 24 2
-----CATGTAAACATCCTACACTCAGC----- mirL 23 2
-----TAAACATCCTACACTCAGCTGT----- mirL 22 1
-----AAACATCCTACACTCAGCTGT----- mirL 21 1
-----CATGTAAACATCCTACACTCA----- mirL 21 1
-----CTGGGATGTGGATGTTTACGT----- mirR 21 427
-----CTGGGATGTGGATGTTTAC----- mirR 19 323
-----CTGGGATGTGGATGTTTACGTC----- mirR 22 275
-----CTGGGATGTGGATGTTTA----- mirR 18 168
-----CTGGGATGTGGATGTTTACGTCA----- mirR 23 127
-----CTGGGATGTGGATGTTTACG----- mirR 20 106
-----GGATGTGGATGTTTACGT----- mirR 18 27
-----TGGGATGTGGATGTTTACGTCA----- mirR 22 22
-----GGATGTGGATGTTTACGTC----- mirR 19 21
-----CTGGGATGTGGATGTTTACGTCAG----- mirR 24 19
-----GGGATGTGGATGTTTACGT----- mirR 19 16
-----TGGGATGTGGATGTTTACGT----- mirR 20 12
-----GCTGGGATGTGGATGTTTACGT----- mirR 22 9
-----GGGATGTGGATGTTTACGTC----- mirR 20 8
-----TGGGATGTGGATGTTTACG----- mirR 19 6
-----TGGGATGTGGATGTTTAC----- mirR 18 5
-----GGATGTGGATGTTTACGTCA----- mirR 20 4
-----GGGATGTGGATGTTTACGTCA----- mirR 21 3
-----GCTGGGATGTGGATGTTTACGTC----- mirR 23 3
-----TGGGATGTGGATGTTTACGTC----- mirR 21 3
-----TGGGATGTGGATGTTTACGTCAG----- mirR 23 3
-----GGGATGTGGATGTTTACG----- mirR 18 1
-----TGGCTGGGATGTGGATGTTT----- mirR 20 1
-----GGCTGGGATGTGGATGTTT----- mirR 19 1
-----TGGGATGTGGATGTTTACGTCAGC----- mirR 24 1
-----GCTGGGATGTGGATGTTTAC----- mirR 20 1
-----GGGATGTGGATGTTTACGTCAG----- mirR 22 1
-----GCTGGGATGTGGATGTTT----- mirR 18 1
-----AGCTGTCTTGGAGTATCC----- morR 18 2
-----TCAGCTGTCTTGGAGTATC----- morR 19 1
-----AGCTGTCTTGGAGTATCCA----- morR 19 1
-----GTCAGCTGTCTTGGAGTATC----- morR 20 1

```

>mmu-mir-100

```

TGAAGCCTGTGCCACAAACCCGTAGATCCGAACTTGTGCTGATTCTGCACACAAGCTTGTGTCTATAGGTATGTGT species len reads
-GAAGCCTGTGCCACAAA----- morL 18 1
TGAAGCCTGTGCCACAA----- morL 18 1
-----AACCCGTAGATCCGAACTTGT----- mirL 21 73579
-----AACCCGTAGATCCGAACTTGTGC----- mirL 23 57519
-----AACCCGTAGATCCGAACTTGTG----- mirL 22 28078
-----AACCCGTAGATCCGAACT----- mirL 18 9437

```

```

-----AACCCGTAGATCCGAACTTG----- mirL 20 5037
-----AACCCGTAGATCCGAACTT----- mirL 19 3718
-----AACCCGTAGATCCGAACTTGTGCT----- mirL 24 1949
-----ACCCGTAGATCCGAACTTGTGC----- mirL 22 772
-----ACCCGTAGATCCGAACTTGT----- mirL 20 374
-----ACCCGTAGATCCGAACTTGTG----- mirL 21 371
-----AAACCCGTAGATCCGAACTTGT----- mirL 22 240
-----AAACCCGTAGATCCGAACT----- mirL 19 54
-----ACCCGTAGATCCGAACTTG----- mirL 19 45
-----ACCCGTAGATCCGAACTTGTGCT----- mirL 23 44
-----CCCGTAGATCCGAACTTGT----- mirL 19 28
-----AAACCCGTAGATCCGAACTTGTG----- mirL 23 23
-----CCGTAGATCCGAACTTGT----- mirL 18 17
-----AAACCCGTAGATCCGAACTTGTGC----- mirL 24 16
-----ACCCGTAGATCCGAACTT----- mirL 18 15
-----CCCGTAGATCCGAACTTGTG----- mirL 20 13
-----CCCGTAGATCCGAACTTGTGC----- mirL 21 11
-----ACCCGTAGATCCGAACTTGTGCTG----- mirL 24 8
-----AAACCCGTAGATCCGAACTT----- mirL 20 8
-----AAACCCGTAGATCCGAACT----- mirL 18 8
-----CCGTAGATCCGAACTTGTG----- mirL 19 7
-----AAACCCGTAGATCCGAACTTG----- mirL 21 5
-----CCGTAGATCCGAACTTGTGCT----- mirL 20 5
-----CCCGTAGATCCGAACTTG----- mirL 18 3
-----CAAACCCGTAGATCCGAACTTGT----- mirL 23 3
-----CCCGTAGATCCGAACTTGTGCT----- mirL 22 1
-----CAAACCCGTAGATCCGAACTTGTG----- mirL 24 1
-----TGTGCTGATTCTGCACAC----- loop 18 2
-----CAAGCTTGTGTCTATAGGTAT----- mirR 21 620
-----ACAAGCTTGTGTCTATAGGTAT----- mirR 22 224
-----CAAGCTTGTGTCTATAGGTATG--- mirR 22 188
-----CAAGCTTGTGTCTATAGGTATGT-- mirR 23 130
-----CAAGCTTGTGTCTATAGGT----- mirR 19 27
-----AAGCTTGTGTCTATAGGTATGT-- mirR 22 23
-----CAAGCTTGTGTCTATAGGTA----- mirR 20 18
-----ACAAGCTTGTGTCTATAGGTA----- mirR 21 13
-----ACAAGCTTGTGTCTATAGGTATG--- mirR 23 11
-----AAGCTTGTGTCTATAGGTATG--- mirR 21 7
-----ACAAGCTTGTGTCTATAGGT----- mirR 20 7
-----ACAAGCTTGTGTCTATAGG----- mirR 19 7
-----GCTTGTGTCTATAGGTAT----- mirR 18 6
-----CAAGCTTGTGTCTATAGGTATGTG- mirR 24 6
-----CAAGCTTGTGTCTATAGGTATGTGT mirR 25 5
-----GCTTGTGTCTATAGGTATG--- mirR 19 5
-----ACAAGCTTGTGTCTATAG----- mirR 18 4
-----ACAAGCTTGTGTCTATAGGTATGT-- mirR 24 3

```

```

-----AGCTTGTGTCTATAGGTA----- mirR 18 3
-----AAGCTTGTGTCTATAGGTAT---- mirR 20 3
-----AGCTTGTGTCTATAGGTAT---- mirR 19 3
-----AGCTTGTGTCTATAGGTATGTGT mirR 23 2
-----AGCTTGTGTCTATAGGTATG--- mirR 20 1
-----AAGCTTGTGTCTATAGGT----- mirR 18 1

```

>mmu-mir-127

| Species | len | reads |
|---------|-----|-------|
| morL    | 19  | 2     |
| morL    | 18  | 1     |
| morL    | 18  | 1     |
| morL    | 18  | 1     |
| morL    | 19  | 1     |
| mirL    | 23  | 6821  |
| mirL    | 21  | 2655  |
| mirL    | 22  | 2510  |
| mirL    | 24  | 2470  |
| mirL    | 22  | 2370  |
| mirL    | 20  | 870   |
| mirL    | 21  | 528   |
| mirL    | 18  | 245   |
| mirL    | 23  | 227   |
| mirL    | 20  | 218   |
| mirL    | 22  | 161   |
| mirL    | 19  | 147   |
| mirL    | 23  | 129   |
| mirL    | 23  | 126   |
| mirL    | 19  | 106   |
| mirL    | 18  | 101   |
| mirL    | 23  | 48    |
| mirL    | 20  | 36    |
| mirL    | 24  | 32    |
| mirL    | 24  | 31    |
| mirL    | 21  | 23    |
| mirL    | 18  | 20    |
| mirL    | 21  | 19    |
| mirL    | 21  | 18    |
| mirL    | 21  | 17    |
| mirL    | 24  | 16    |
| mirL    | 22  | 15    |
| mirL    | 19  | 13    |
| mirL    | 25  | 13    |
| mirL    | 19  | 11    |
| mirL    | 18  | 10    |
| mirL    | 19  | 8     |

```

-----GCTGAAGCTCAGAGGGCTCTGATTC----- mirL 25 8
-----TGAAGCTCAGAGGGCTCTGA----- mirL 20 7
-----AAGCTCAGAGGGCTCTGATTC----- mirL 22 6
-----GCTGAAGCTCAGAGGGCTCTGA----- mirL 22 5
-----TGAAGCTCAGAGGGCTCTG----- mirL 19 5
-----GCTGAAGCTCAGAGGGCTCT----- mirL 20 4
-----TGAAGCTCAGAGGGCTCT----- mirL 18 4
-----TGAAGCTCAGAGGGCTCTGATTC----- mirL 24 3
-----AAGCTCAGAGGGCTCTGATTCAGA----- mirL 24 2
-----AAGCTCAGAGGGCTCTGATTCAG----- mirL 23 1
-----TCGGATCCGTCTGAGCTTGGC----- mirR 21 54108
-----TCGGATCCGTCTGAGCTTGGCT----- mirR 22 48394
-----TCGGATCCGTCTGAGCTTGGCTG----- mirR 23 14418
-----TCGGATCCGTCTGAGCTTGG----- mirR 20 9779
-----TCGGATCCGTCTGAGCTTGGCTGG----- mirR 24 8222
-----TCGGATCCGTCTGAGCTTGG----- mirR 19 7743
-----TCGGATCCGTCTGAGCTT----- mirR 18 4309
-----ATCGGATCCGTCTGAGCTTGGC----- mirR 22 2577
-----CGGATCCGTCTGAGCTTGGCT----- mirR 21 939
-----CGGATCCGTCTGAGCTTGGC----- mirR 20 810
-----ATCGGATCCGTCTGAGCTTGG----- mirR 21 753
-----CATCGGATCCGTCTGAGCTTGG----- mirR 22 631
-----CGGATCCGTCTGAGCTTGG----- mirR 19 558
-----CGGATCCGTCTGAGCTTGGCTG----- mirR 22 451
-----CGGATCCGTCTGAGCTTGGCTGG----- mirR 23 344
-----CATCGGATCCGTCTGAGCTTGGC----- mirR 23 334
-----ATCGGATCCGTCTGAGCTTGG----- mirR 20 255
-----ATCGGATCCGTCTGAGCTTGGCT----- mirR 23 171
-----ATCGGATCCGTCTGAGCTTGGCTG----- mirR 24 144
-----ATCGGATCCGTCTGAGCTT----- mirR 19 141
-----GGATCCGTCTGAGCTTGGCTGG----- mirR 22 111
-----CGGATCCGTCTGAGCTTGGCTGGT----- mirR 24 110
-----CGGATCCGTCTGAGCTTGG----- mirR 18 99
-----GGATCCGTCTGAGCTTGGC----- mirR 19 81
-----GGATCCGTCTGAGCTTGG----- mirR 18 78
-----GGATCCGTCTGAGCTTGGCT----- mirR 20 56
-----ATCGGATCCGTCTGAGCT----- mirR 18 49
-----GGATCCGTCTGAGCTTGGCTG----- mirR 21 31
-----GATCCGTCTGAGCTTGGCT----- mirR 19 28
-----CATCGGATCCGTCTGAGCTTGG----- mirR 21 26
-----GATCCGTCTGAGCTTGGC----- mirR 18 25
-----CATCGGATCCGTCTGAGCTT----- mirR 20 23
-----GGATCCGTCTGAGCTTGGCTGGT----- mirR 23 19
-----GGATCCGTCTGAGCTTGGCTGGTC----- mirR 24 14
-----CATCGGATCCGTCTGAGC----- mirR 18 12
-----CATCGGATCCGTCTGAGCTTGGCT----- mirR 24 9

```

```

-----GATCCGTCTGAGCTTGGCTG--- mirR 20 7
-----CATCGGATCCGTCTGAGCT----- mirR 19 5
-----TCATCGGATCCGTCTGAGCTTGG----- mirR 23 1
-----TCATCGGATCCGTCTGAGCTTGGC----- mirR 24 1

```

>mmu-mir-30a

| Species | len | reads |
|---------|-----|-------|
| morL    | 20  | 4     |
| morL    | 21  | 1     |
| morL    | 20  | 1     |
| mirL    | 23  | 51592 |
| mirL    | 24  | 23390 |
| mirL    | 21  | 21962 |
| mirL    | 22  | 17071 |
| mirL    | 25  | 11617 |
| mirL    | 20  | 7924  |
| mirL    | 19  | 6707  |
| mirL    | 22  | 4121  |
| mirL    | 23  | 3350  |
| mirL    | 24  | 1731  |
| mirL    | 21  | 1406  |
| mirL    | 20  | 1375  |
| mirL    | 25  | 1012  |
| mirL    | 19  | 498   |
| mirL    | 22  | 113   |
| mirL    | 20  | 50    |
| mirL    | 21  | 38    |
| mirL    | 21  | 34    |
| mirL    | 23  | 30    |
| mirL    | 19  | 29    |
| mirL    | 18  | 25    |
| mirL    | 24  | 21    |
| mirL    | 20  | 20    |
| mirL    | 24  | 16    |
| mirL    | 22  | 16    |
| mirL    | 22  | 10    |
| mirL    | 19  | 8     |
| mirL    | 23  | 5     |
| mirL    | 20  | 3     |
| mirL    | 25  | 3     |
| mirL    | 26  | 3     |
| mirL    | 25  | 3     |
| mirL    | 23  | 3     |
| mirL    | 27  | 2     |
| mirL    | 26  | 2     |
| mirL    | 25  | 1     |

```

-----GACTGTAAACATCCTCGACTGG----- mirL 22 1
-----GACTGTAAACATCCTCGACTGGAAGCT----- mirL 27 1
-----GACTGTAAACATCCTCGACTGGAA----- mirL 24 1
-----ACTGTAAACATCCTCGACT----- mirL 19 1
-----GCTGTGAAGCCACAAATG----- loop 18 1
-----GTGAAGCCACAAATGGGCT----- loop 19 1
-----CTTTCAGTCGGATGTTTGCAGC----- mirR 22 9688
-----CTTTCAGTCGGATGTTTGCAG----- mirR 21 4274
-----CTTTCAGTCGGATGTTTGC----- mirR 19 1985
-----CTTTCAGTCGGATGTTTGCAGCT----- mirR 23 1758
-----CTTTCAGTCGGATGTTTGCAG----- mirR 20 654
-----TTTCAGTCGGATGTTTGCAGC----- mirR 21 311
-----CTTTCAGTCGGATGTTTGCAGCTG----- mirR 24 252
-----CTTTCAGTCGGATGTTTGC----- mirR 18 186
-----TTTCAGTCGGATGTTTGCAGCT----- mirR 22 159
-----TTTCAGTCGGATGTTTGCAG----- mirR 20 79
-----TTCAGTCGGATGTTTGCAGC----- mirR 20 36
-----TTTCAGTCGGATGTTTGC----- mirR 18 32
-----TTTCAGTCGGATGTTTGCAGCTG----- mirR 23 26
-----GCTTTCAGTCGGATGTTTGCAGC----- mirR 23 22
-----TTCAGTCGGATGTTTGCAGCT----- mirR 21 21
-----TTTCAGTCGGATGTTTGCAG----- mirR 19 12
-----TTTCAGTCGGATGTTTGCAGCTGC----- mirR 24 10
-----TTCAGTCGGATGTTTGCAG----- mirR 19 7
-----GCTTTCAGTCGGATGTTTGCAGCT----- mirR 24 5
-----GCTTTCAGTCGGATGTTTGC----- mirR 20 4
-----GCTTTCAGTCGGATGTTTGCAG----- mirR 22 4
-----TCAGTCGGATGTTTGCAG----- mirR 18 3
-----TTCAGTCGGATGTTTGCAGCTG----- mirR 22 2
-----GCTTTCAGTCGGATGTTTGC----- mirR 19 1
-----GCTTTCAGTCGGATGTTTGCAG----- mirR 21 1
-----GCTGCCTACTGCCTCCAA----- morR 18 1
-----CCTACTGCCTCCAACCTTC morR 18 1

>mmu-mir-30e
TTTTCTGGGCAGTCTTTGCTACTGTAAACATCCTTGACTGGAAGCTGTAAGGTGTTGAGAGGAGCTTTCAGTCGGATGTTTACAGCGGCAGGCTGCCACAGTCGTCCTCCCGGC species len reads
----CTGGGCAGTCTTTGCTAC----- morL 18 3
-TTTCCTGGGCAGTCTTTGCTAC----- morL 21 2
TTTTCTGGGCAGTCTTTGCTAC----- morL 22 2
--TTCTGGGCAGTCTTTGCT----- morL 18 1
-----TGTAACATCCTTGACTGGAAGC----- mirL 23 44128
-----TGTAACATCCTTGACTGGAAGCT----- mirL 24 23197
-----TGTAACATCCTTGACTGGAAGCTG----- mirL 25 14004
-----TGTAACATCCTTGACTGGAA----- mirL 21 11912
-----TGTAACATCCTTGACTGGAAG----- mirL 22 11593
-----TGTAACATCCTTGACTGGAAGCTGT----- mirL 26 8350

```



```

-----TGTA AACATCCTTGACTGGA----- mirL 20 8220
-----GTA AACATCCTTGACTGGAAGC----- mirL 22 6157
-----GTA AACATCCTTGACTGGAAGCT----- mirL 23 5888
-----GTA AACATCCTTGACTGGAAGCTG----- mirL 24 3803
-----GTA AACATCCTTGACTGGAAGCTGT----- mirL 25 2805
-----GTA AACATCCTTGACTGGAAG----- mirL 21 1644
-----GTA AACATCCTTGACTGGAA----- mirL 20 1139
-----GTA AACATCCTTGACTGGA----- mirL 19 750
-----TAA AACATCCTTGACTGGAAGCT----- mirL 22 110
-----TAA AACATCCTTGACTGGAAGCTG----- mirL 23 64
-----TAA AACATCCTTGACTGGAAGCTGT----- mirL 24 44
-----AA AACATCCTTGACTGGAAGCT----- mirL 21 29
-----TAA AACATCCTTGACTGGAAGC----- mirL 21 29
-----AA AACATCCTTGACTGGAAG----- mirL 19 18
-----AA AACATCCTTGACTGGAAGCTGT----- mirL 23 17
-----AA AACATCCTTGACTGGAAGC----- mirL 20 12
-----AA AACATCCTTGACTGGAAGCTG----- mirL 22 10
-----CTGTAA AACATCCTTGACTGGAAGC----- mirL 24 10
-----TAA AACATCCTTGACTGGAA----- mirL 19 7
-----TAA AACATCCTTGACTGGAAGCTGTA----- mirL 25 7
-----TAA AACATCCTTGACTGGA----- mirL 18 5
-----CTGTAA AACATCCTTGACTGGAAGCT----- mirL 25 4
-----AA AACATCCTTGACTGGAA----- mirL 18 3
-----CTGTAA AACATCCTTGACTGGAA----- mirL 22 3
-----CTGTAA AACATCCTTGACTGGAAG----- mirL 23 3
-----CTGTAA AACATCCTTGACTGG----- mirL 20 2
-----TACTGTAA AACATCCTTGAC----- mirL 19 1
-----ACTGTAA AACATCCTTGACTGGAAG----- mirL 24 1
-----CTGTAA AACATCCTTGACTGGAAGCTG----- mirL 26 1
-----CTGTAA AACATCCTTGACTGGA----- mirL 21 1
-----ACTGTAA AACATCCTTGACTGGAAGC----- mirL 25 1
-----GTAAGGTGTTGAGAGGAG----- loop 18 13
-----GTAAGGTGTTGAGAGGAGCT----- loop 20 5
-----GTAAGGTGTTGAGAGGAGC----- loop 19 3
-----CTGTAAAGGTGTTGAGAGGA----- loop 19 1
-----AGCTGTAAGGTGTTGAGAG----- loop 19 1
-----TAAGGTGTTGAGAGGAGC----- loop 18 1
-----TGTAAGGTGTTGAGAGGAG----- loop 19 1
-----GTAAGGTGTTGAGAGGAGCTT----- loop 21 1
-----GCTGTAAGGTGTTGAGAG----- loop 18 1
-----CTTTCAGTCGGATGTTTACAGC----- mirR 22 11143
-----CTTTCAGTCGGATGTTTACAG----- mirR 21 6764
-----CTTTCAGTCGGATGTTTACAGCG----- mirR 23 3701
-----CTTTCAGTCGGATGTTTAC----- mirR 19 2090
-----CTTTCAGTCGGATGTTTACA----- mirR 20 1052
-----CTTTCAGTCGGATGTTTACAGCG----- mirR 24 497

```

```

-----CTTTCAGTCGGATGTTTACAGCGGC----- mirR 25 270
-----TTCAGTCGGATGTTTACAGCG----- mirR 22 79
-----TTCAGTCGGATGTTTACAGC----- mirR 21 73
-----GCTTTCAGTCGGATGTTTACAGC----- mirR 23 42
-----TTCAGTCGGATGTTTACAG----- mirR 20 19
-----GCTTTCAGTCGGATGTTTACAG----- mirR 22 18
-----GCTTTCAGTCGGATGTTTAC----- mirR 20 12
-----TTCAGTCGGATGTTTAC----- mirR 18 9
-----TTCAGTCGGATGTTTACAGCG----- mirR 23 9
-----GCTTTCAGTCGGATGTTTACAGCG----- mirR 24 7
-----TTCAGTCGGATGTTTACAGC----- mirR 20 6
-----GCTTTCAGTCGGATGTTTACA----- mirR 21 5
-----TCAGTCGGATGTTTACAG----- mirR 18 4
-----TCAGTCGGATGTTTACAGC----- mirR 19 3
-----TTCAGTCGGATGTTTACAGCGGC----- mirR 24 3
-----GCTTTCAGTCGGATGTTTACAGCG----- mirR 25 3
-----TTCAGTCGGATGTTTACAGCG----- mirR 21 2
-----TTCAGTCGGATGTTTACA----- mirR 19 2
-----TTCAGTCGGATGTTTACAG----- mirR 19 2
-----TCAGTCGGATGTTTACAGCG----- mirR 20 1
-----AGCTTTCAGTCGGATGTTTACA----- mirR 22 1
-----TTCAGTCGGATGTTTACA----- mirR 18 1
-----AGCTTTCAGTCGGATGTTTA----- mirR 20 1
-----GCTTTCAGTCGGATGTTTACAGCGGCA----- mirR 27 1
-----GAGCTTTCAGTCGGATGTTTACAGCG----- mirR 26 1
-----AGCTTTCAGTCGGATGTTTACAGC----- mirR 24 1
-----GAGCTTTCAGTCGGATGT----- mirR 18 1
-----AGGCTGCCACAGTCGTCCC----- morR 19 443
-----AGGCTGCCACAGTCGTCCCC----- morR 20 196
-----AGGCTGCCACAGTCGTCC----- morR 18 118
-----AGGCTGCCACAGTCGTCCCCG----- morR 21 35
-----AGGCTGCCACAGTCGTCCCCGG----- morR 22 5
-----GCAGGCTGCCACAGTCGT----- morR 19 3
-----GCAGGCTGCCACAGTCGT----- morR 18 1
-----CAGGCTGCCACAGTCGT----- morR 18 1
-----AGGCTGCCACAGTCGTCCCCGGC----- morR 23 1
-----GGCAGGCTGCCACAGTCGTCCC----- morR 22 1

```

>mmu-mir-342

```

GAGGGGTGCTATCTGTGATTGAGGGACATGGTCAATGGAATTGTCTCACACAGAAATCGCACCCGTCACCTTGGCCTGCTGAGCACC species len reads
-AGGGGTGCTATCTGTGATTGA----- mirL 21 484
-AGGGGTGCTATCTGTGATTGAG----- mirL 22 376
-AGGGGTGCTATCTGTGATTGAGGGA----- mirL 25 207
-AGGGGTGCTATCTGTGATTGAGGG----- mirL 24 200
-AGGGGTGCTATCTGTGATTGAGG----- mirL 23 193
-AGGGGTGCTATCTGTGATTG----- mirL 20 163

```

```
-AGGGGTGCTATCTGTGATT----- mirL 19 161
--GGGGTGCTATCTGTGATTGAG----- mirL 21 113
--GGGGTGCTATCTGTGATTGAGGG----- mirL 23 104
--GGGGTGCTATCTGTGATTGA----- mirL 20 101
--GGGGTGCTATCTGTGATTGAGGGAC----- mirL 25 101
--GGGGTGCTATCTGTGATTGAGGGA----- mirL 24 89
--GGGGTGCTATCTGTGATTGAGG----- mirL 22 67
---GGTGCTATCTGTGATTGA----- mirL 18 64
--GGGGTGCTATCTGTGATTGAGGGACA----- mirL 26 40
---GGTGCTATCTGTGATTGAG----- mirL 19 13
---GGGTGCTATCTGTGATTGA----- mirL 19 9
---GGGTGCTATCTGTGATTG----- mirL 18 7
---GGGTGCTATCTGTGATTGAGG----- mirL 21 2
---GGGTGCTATCTGTGATTGAGGG----- mirL 22 2
---GGGTGCTATCTGTGATTGAG----- mirL 20 2
GAGGGGTGCTATCTGTGATTGAGGGACA----- mirL 28 1
GAGGGGTGCTATCTGTGATT----- mirL 20 1
-----AGGGACATGGTCAATGGAA----- loop 19 2
-----GGGACATGGTCAATGGAA----- loop 18 1
-----AGGGACATGGTCAATGGAATTG----- loop 22 1
-----TCTCACACAGAAATCGCACCCGT----- mirR 23 40833
-----TCTCACACAGAAATCGCACCCGTC----- mirR 24 34822
-----TCTCACACAGAAATCGCACCC----- mirR 20 33514
-----TCTCACACAGAAATCGCACCC----- mirR 21 14212
-----TCTCACACAGAAATCGCACCCGTCA----- mirR 25 8831
-----TCTCACACAGAAATCGCACCCG----- mirR 22 8425
-----TCTCACACAGAAATCGCAC----- mirR 19 5277
-----TCACACAGAAATCGCACCCGTCA----- mirR 23 4201
-----TCACACAGAAATCGCACCC----- mirR 18 3115
-----TCACACAGAAATCGCACCCGTC----- mirR 22 3082
-----TCACACAGAAATCGCACCCGT----- mirR 21 2150
-----TCACACAGAAATCGCACCCGTCA----- mirR 24 1824
-----CTCACACAGAAATCGCACCCGT----- mirR 22 1238
-----TCACACAGAAATCGCACCC----- mirR 19 818
-----CTCACACAGAAATCGCACCCGTC----- mirR 23 758
-----CTCACACAGAAATCGCACCC----- mirR 19 691
-----TCACACAGAAATCGCACCCGTCA----- mirR 25 366
-----CTCACACAGAAATCGCACCCGTCA----- mirR 24 268
-----CTCACACAGAAATCGCACCC----- mirR 20 245
-----CTCACACAGAAATCGCACCCG----- mirR 21 205
-----CACACAGAAATCGCACCCGT----- mirR 20 139
-----CTCACACAGAAATCGCACCCGTCA----- mirR 25 137
-----CACACAGAAATCGCACCCGTCA----- mirR 22 82
-----CACACAGAAATCGCACCCGTCA----- mirR 21 72
-----CACACAGAAATCGCACCCG----- mirR 19 66
-----CACACAGAAATCGCACCCGTCA----- mirR 23 58
```

```

-----CACACAGAAATCGCACCC----- mirR 18 50
-----GTCTCACACAGAAATCGCACCCGT----- mirR 24 16
-----GTCTCACACAGAAATCGCACCCGTC----- mirR 25 14
-----GTCTCACACAGAAATCGCACCC----- mirR 21 13
-----GTCTCACACAGAAATCGCACCC----- mirR 22 8
-----TGTCTCACACAGAAATCGCACCCGT----- mirR 25 6
-----GTCTCACACAGAAATCGCACCCGTCA----- mirR 26 3
-----CACACAGAAATCGCACCCGTCA----- mirR 24 2
-----GTCTCACACAGAAATCGCA----- mirR 19 2
-----GTCTCACACAGAAATCGCACCCG----- mirR 23 2
-----TTGTCTCACACAGAAATCGCACCCGT----- mirR 26 1
-----TTGTCTCACACAGAAATCGCACCC----- mirR 23 1
-----TGTCTCACACAGAAATCGCACCC----- mirR 22 1
-----TGTCTCACACAGAAATCGCACCC----- mirR 23 1
-----CCTTGGCCTGCTGAGCACC morR 19 1
-----TCACCTTGGCCTGCTGAG----- morR 18 1
-----CACCTTGGCCTGCTGAGC----- morR 18 1

```

>mmu-mir-487b

```

CAGGCCGAGCTTTGGTACTTGGAGAGTGGTTATCCCTGTCTCTTCGCTTCACTCATGCCGAATCGTACAGGGTCATCCACTTTTTC species len reads
---GCCGAGCTTTGGTACTTG----- morL 18 2
CAGGCCGAGCTTTGGTAC----- morL 18 2
-----GAGAGTGGTTATCCCTGTCTCT----- mirL 22 29
-----GAGAGTGGTTATCCCTGTCTCT----- mirL 23 22
-----GAGAGTGGTTATCCCTGTCTCTT----- mirL 24 18
-----GAGAGTGGTTATCCCTGTCTCT----- mirL 20 14
-----GAGAGTGGTTATCCCTGTCTCT----- mirL 21 5
-----AGTGGTTATCCCTGTCTCT----- mirL 20 3
-----AGAGTGGTTATCCCTGTCT----- mirL 18 3
-----GAGAGTGGTTATCCCTGTCTCTT----- mirL 25 3
-----AGTGGTTATCCCTGTCTCTT----- mirL 21 2
-----AGAGTGGTTATCCCTGTCTCT----- mirL 20 1
-----GAGTGGTTATCCCTGTCTCT----- mirL 18 1
-----TGGAGAGTGGTTATCCCTG----- mirL 19 1
-----AGAGTGGTTATCCCTGTCTCT----- mirL 19 1
-----AGTGGTTATCCCTGTCTCT----- mirL 19 1
-----GCTTCACTCATGCCGAAT----- loop 18 1
-----CTCTTCGCTTCACTCATGC----- loop 19 1
-----TCTTCGCTTCACTCATGC----- loop 18 1
-----CTCTTCGCTTCACTCATG----- loop 18 1
-----TCGCTTCACTCATGCCGA----- loop 18 1
-----TCTTCGCTTCACTCATGCC----- loop 19 1
-----TCGCTTCACTCATGCCGA----- loop 19 1
-----AATCGTACAGGGTCATCCACTT----- mirR 22 100215
-----AATCGTACAGGGTCATCCACTTT----- mirR 23 16080
-----AATCGTACAGGGTCATCCACT----- mirR 21 13221

```

```

-----ATCGTACAGGGTCATCCACTTT--- mirR 22 8153
-----AATCGTACAGGGTCATCCAC----- mirR 20 5782
-----ATCGTACAGGGTCATCCACTT--- mirR 21 4979
-----AATCGTACAGGGTCATCCA----- mirR 19 2340
-----AATCGTACAGGGTCATCC----- mirR 18 2214
-----AATCGTACAGGGTCATCCACTTTT--- mirR 24 1848
-----ATCGTACAGGGTCATCCACTTTT--- mirR 23 1433
-----ATCGTACAGGGTCATCCAC----- mirR 19 822
-----ATCGTACAGGGTCATCCACT--- mirR 20 663
-----TCGTACAGGGTCATCCACTT--- mirR 20 181
-----TCGTACAGGGTCATCCACTTT--- mirR 21 178
-----ATCGTACAGGGTCATCCA----- mirR 18 166
-----ATCGTACAGGGTCATCCACTTTTT--- mirR 24 164
-----CGTACAGGGTCATCCACTT--- mirR 19 135
-----TCGTACAGGGTCATCCACTTTT--- mirR 22 113
-----TCGTACAGGGTCATCCACT--- mirR 19 96
-----CGTACAGGGTCATCCACT--- mirR 18 68
-----CGTACAGGGTCATCCACTTT--- mirR 20 41
-----GAATCGTACAGGGTCATCCACTT--- mirR 23 41
-----TCGTACAGGGTCATCCACTTTTT--- mirR 23 38
-----TCGTACAGGGTCATCCAC----- mirR 18 25
-----TCGTACAGGGTCATCCACTTTTTC--- mirR 24 16
-----CGTACAGGGTCATCCACTTTT--- mirR 21 8
-----CCGAATCGTACAGGGTCATCCACTT--- mirR 25 6
-----GAATCGTACAGGGTCATCCACT--- mirR 22 5
-----GAATCGTACAGGGTCATCCAC----- mirR 21 3
-----CCGAATCGTACAGGGTCAT--- mirR 19 3
-----CGAATCGTACAGGGTCATCCACTT--- mirR 24 3
-----CGAATCGTACAGGGTCATCC----- mirR 20 2
-----CGAATCGTACAGGGTCATCCAC----- mirR 22 2
-----CCGAATCGTACAGGGTCATCC----- mirR 21 2
-----CGTACAGGGTCATCCACTTTTTC--- mirR 23 1
-----GAATCGTACAGGGTCATCCACTTT--- mirR 24 1
-----CGTACAGGGTCATCCACTTTTT--- mirR 22 1
-----CCGAATCGTACAGGGTCA----- mirR 18 1

```

>mmu-let-7e

```

CCACCTGCCGCGCCCCCGGGCTGAGGTAGGAGGTTGTATAGTTGAGGAAGACACCCGAGGAGATCACTATACGGCCTCTAGCTTTCCCA species len reads
-----CTGCCGCGCCCCCGGGCT----- morL 19 5
CCACCTGCCGCGCCCCCGGGC----- morL 22 1
-----TGAGGTAGGAGGTTGTATAGTT----- mirL 22 53959
-----TGAGGTAGGAGGTTGTATAG----- mirL 20 25862
-----TGAGGTAGGAGGTTGTATAGTTG----- mirL 23 23289
-----TGAGGTAGGAGGTTGTATAGT----- mirL 21 22134
-----TGAGGTAGGAGGTTGTATAGTTGA----- mirL 24 9154
-----TGAGGTAGGAGGTTGTAT----- mirL 18 7245

```

```

-----TGAGGTAGGAGGTTGTATA----- mirL 19 6605
-----GAGGTAGGAGGTTGTATAGTT----- mirL 21 1009
-----GAGGTAGGAGGTTGTATAGTTG----- mirL 22 549
-----GAGGTAGGAGGTTGTATAG----- mirL 19 499
-----GAGGTAGGAGGTTGTATAGT----- mirL 20 366
-----GAGGTAGGAGGTTGTATAGTTGA----- mirL 23 242
-----GAGGTAGGAGGTTGTATA----- mirL 18 112
-----GAGGTAGGAGGTTGTATAGTTGAG----- mirL 24 27
-----AGGTAGGAGGTTGTATAG----- mirL 18 22
-----GGTAGGAGGTTGTATAGTT----- mirL 19 13
-----AGGTAGGAGGTTGTATAGTT----- mirL 20 13
-----AGGTAGGAGGTTGTATAGT----- mirL 19 12
-----GGTAGGAGGTTGTATAGT----- mirL 18 9
-----CTGAGGTAGGAGGTTGTATAG----- mirL 21 4
-----AGGTAGGAGGTTGTATAGTTGA----- mirL 22 4
-----CTGAGGTAGGAGGTTGTATAGTTG----- mirL 24 2
-----GCTGAGGTAGGAGGTTGTATAGTTG----- mirL 25 2
-----AGGTAGGAGGTTGTATAGTTG----- mirL 21 2
-----GGTAGGAGGTTGTATAGTTG----- mirL 20 2
-----CTGAGGTAGGAGGTTGTATAGT----- mirL 22 2
-----GCTGAGGTAGGAGGTTGTATAGTT----- mirL 24 2
-----CTGAGGTAGGAGGTTGTATA----- mirL 20 1
-----CTGAGGTAGGAGGTTGTATAGTT----- mirL 23 1
-----CTGAGGTAGGAGGTTGTAT----- mirL 19 1
-----CTGAGGTAGGAGGTTGTATAGTTGA----- mirL 25 1
-----GGCTGAGGTAGGAGGTTGTATA----- mirL 22 1
-----GCTGAGGTAGGAGGTTGTATAG----- mirL 22 1
-----GGCTGAGGTAGGAGGTTG----- mirL 18 1
-----AGGTAGGAGGTTGTATAGTTGAG----- mirL 23 1
-----GAGGAAGACACCCGAGGAGAT----- loop 21 7
-----GAGGAAGACACCCGAGGAGATC----- loop 22 4
-----GAGGAAGACACCCGAGGAGAGA----- loop 20 3
-----AGGAAGACACCCGAGGAGATCA----- loop 22 3
-----GAGGAAGACACCCGAGGAGATCA----- loop 23 2
-----AGGAAGACACCCGAGGAGATCACT----- loop 24 1
-----AGGAAGACACCCGAGGAGAGA----- loop 19 1
-----CTATACGGCCTCCTAGCTTTCC--- mirR 22 4036
-----CTATACGGCCTCCTAGCTTTCC--- mirR 21 1091
-----CTATACGGCCTCCTAGCTTTCCC--- mirR 23 466
-----CTATACGGCCTCCTAGCTTT--- mirR 20 315
-----TATACGGCCTCCTAGCTTTCC--- mirR 21 104
-----TATACGGCCTCCTAGCTTTCCC--- mirR 22 79
-----CTATACGGCCTCCTAGCTT--- mirR 19 63
-----CTATACGGCCTCCTAGCTTTCCCC--- mirR 24 53
-----CTATACGGCCTCCTAGCT--- mirR 18 50
-----ATACGGCCTCCTAGCTTTCC--- mirR 20 46

```

```

-----TACGGCCTCCTAGCTTTCC-- mirR 19 40
-----TATACGGCCTCCTAGCTTTC---- mirR 20 25
-----TATACGGCCTCCTAGCTTTCCCC- mirR 23 23
-----ATACGGCCTCCTAGCTTTC---- mirR 19 18
-----ACTATACGGCCTCCTAGCTTTCC-- mirR 23 17
-----TACGGCCTCCTAGCTTTC---- mirR 18 15
-----TCACTATACGGCCTCCTAGCTTT---- mirR 23 13
-----CACTATACGGCCTCCTAGCTTTC---- mirR 23 10
-----ATACGGCCTCCTAGCTTTCCCC- mirR 21 9
-----TCACTATACGGCCTCCTAGCTTTC---- mirR 24 9
-----ATACGGCCTCCTAGCTTT---- mirR 18 7
-----TATACGGCCTCCTAGCTTT---- mirR 19 7
-----ACTATACGGCCTCCTAGCTTTC-- mirR 22 6
-----CACTATACGGCCTCCTAGCTTTC-- mirR 24 6
-----CACTATACGGCCTCCTAGCTTT---- mirR 22 5
-----TCACTATACGGCCTCCTAGC----- mirR 20 5
-----TCACTATACGGCCTCCTAGCTTTCC-- mirR 25 4
-----ACTATACGGCCTCCTAGCTTT---- mirR 21 4
-----TCACTATACGGCCTCCTAGCTT---- mirR 22 3
-----CACTATACGGCCTCCTAGCTT---- mirR 21 2
-----CACTATACGGCCTCCTAGCTTTCCCC- mirR 25 2
-----TATACGGCCTCCTAGCTTTCCCCA mirR 24 1
-----CACTATACGGCCTCCTAGC----- mirR 19 1
-----TCACTATACGGCCTCCTAGCT---- mirR 21 1
-----ACTATACGGCCTCCTAGCTTTCCCC-- mirR 24 1
-----TATACGGCCTCCTAGCTT---- mirR 18 1
-----ACTATACGGCCTCCTAGCTT---- mirR 20 1
-----TCACTATACGGCCTCCTAG----- mirR 19 1
-----ACTATACGGCCTCCTAGCTTTCCCCA mirR 26 1
-----CACTATACGGCCTCCTAG----- mirR 18 1

```

>mmu-mir-92b

| Species                                                                                                      | len | reads |
|--------------------------------------------------------------------------------------------------------------|-----|-------|
| CCAGAGCCCCGGGTGGGCGGGAGGGACGGGACGTGGTGCAGTGTGTTCTTTCCCCCTGCCAATATTGCACTCGTCCCGGCCTCCGGCCCCCTCGGCCCCCCGGCGCCC | 18  | 2     |
| CCAGAGCCCCGGGTGGGC                                                                                           | 18  | 1     |
| -CAGAGCCCCGGGTGGGCG-                                                                                         | 18  | 1     |
| ---AGCCCCGGGTGGGCGGA---                                                                                      | 18  | 1     |
| -----AGGGACGGGACGTGGTGCAGTGT-----                                                                            | 23  | 446   |
| -----AGGGACGGGACGTGGTGCAGTGTG-----                                                                           | 25  | 242   |
| -----AGGGACGGGACGTGGTGCAGTGT-----                                                                            | 24  | 235   |
| -----AGGGACGGGACGTGGTGCAG-----                                                                               | 20  | 128   |
| -----AGGGACGGGACGTGGTGCAGT-----                                                                              | 22  | 101   |
| -----AGGGACGGGACGTGGTGCAGTGTG-----                                                                           | 26  | 93    |
| -----AGGGACGGGACGTGGTGCAGT-----                                                                              | 21  | 81    |
| -----GGGACGGGACGTGGTGCAGTGT-----                                                                             | 24  | 32    |
| -----GACGGGACGTGGTGCAGTGT-----                                                                               | 22  | 27    |
| -----GACGGGACGTGGTGCAGTGT-----                                                                               | 23  | 25    |

```

-----GGGACGGGACGTGGTGCAGTGTGT----- mirL 25 24
-----GGGACGGGACGTGGTGCAGTGTT----- mirL 23 18
-----GGGACGGGACGTGGTGCAGTGT----- mirL 22 10
-----GGGACGGGACGTGGTGCAGT----- mirL 20 10
-----GGGACGGGACGTGGTGCAGTG----- mirL 21 5
-----GGGACGGGACGTGGTGCAG----- mirL 19 5
-----GACGGGACGTGGTGCAGT----- mirL 18 3
-----GACGGGACGTGGTGCAGTGTT----- mirL 21 2
-----GGACGGGACGTGGTGCAGTGTT----- mirL 22 1
-----GGACGGGACGTGGTGCAGTG----- mirL 20 1
-----GACGGGACGTGGTGCAGTGTGTTTC----- mirL 25 1
-----GTTGTTCTTTCCCCTGCCA----- loop 19 2
-----TGTTGTTCTTTCCCCTGCC----- loop 19 2
-----GTTCTTTCCCCTGCCAAT----- loop 18 1
-----GTTGTTCTTTCCCCTGCCAA----- loop 20 1
-----TATTGCACTCGTCCCGGCCTCC----- mirR 22 73429
-----TATTGCACTCGTCCCGGCCTC----- mirR 21 22600
-----TATTGCACTCGTCCCGGCCTCCG----- mirR 23 16951
-----TATTGCACTCGTCCCGGCCTCCGG----- mirR 24 14517
-----TATTGCACTCGTCCCGGC----- mirR 18 6551
-----TATTGCACTCGTCCCGGCC----- mirR 19 4974
-----TATTGCACTCGTCCCGGCCT----- mirR 20 4973
-----ATTGCACTCGTCCCGGCCTCC----- mirR 21 3305
-----ATTGCACTCGTCCCGGCCTCCG----- mirR 22 2027
-----ATTGCACTCGTCCCGGCCTCCGG----- mirR 23 1679
-----ATTGCACTCGTCCCGGCCTC----- mirR 20 1109
-----ATTGCACTCGTCCCGGCCTCCGGC----- mirR 24 634
-----ATTGCACTCGTCCCGGCCTCCGGCC----- mirR 25 359
-----ATTGCACTCGTCCCGGCCT----- mirR 19 309
-----ATATTGCACTCGTCCCGGCCTCC----- mirR 23 232
-----ATATTGCACTCGTCCCGGCCTCCG----- mirR 24 90
-----ATATTGCACTCGTCCCGGCCTC----- mirR 22 72
-----ATATTGCACTCGTCCCGGCCTCCGG----- mirR 25 48
-----ATATTGCACTCGTCCCGGC----- mirR 19 42
-----TGCACCTCGTCCCGGCCTCC----- mirR 19 42
-----TTGCACCTCGTCCCGGCCTCC----- mirR 20 34
-----TGCACCTCGTCCCGGCCTC----- mirR 18 32
-----ATATTGCACTCGTCCCGGC----- mirR 20 29
-----TTGCACCTCGTCCCGGCCTC----- mirR 19 20
-----ATATTGCACTCGTCCCGGCCTCCGGC----- mirR 26 15
-----TGCACCTCGTCCCGGCCTCCG----- mirR 20 8
-----TTGCACCTCGTCCCGGCCTCCG----- mirR 21 5
-----TGCACCTCGTCCCGGCCTCCGG----- mirR 21 4
-----TTGCACCTCGTCCCGGCCT----- mirR 18 4
-----TTGCACCTCGTCCCGGCCTCCGGC----- mirR 23 4
-----TGCACCTCGTCCCGGCCTCCGGC----- mirR 22 3

```



```

-----AATATTGCACTCGTCCCGGCCTCC----- mirR 24 3
-----TTGCACTCGTCCCGGCCTCCGG----- mirR 22 3
-----TTGCACTCGTCCCGGCCTCCGGCC----- mirR 24 1
-----CAATATTGCACTCGTCCCGGCCT----- mirR 23 1
-----AATATTGCACTCGTCCCGGC----- mirR 20 1
-----AATATTGCACTCGTCCCGGCCT----- mirR 22 1
-----CAATATTGCACTCGTCCCGGCCTC----- mirR 24 1
-----TGCACCTCGTCCCGGCCTCCGGCC----- mirR 23 1
-----CGCCCCCTCGGCCCCCC----- morR 18 4
-----GCCCCCTCGGCCCCCCCG----- morR 18 2
-----GGCCCCCTCGGCCCCCCCGGCC morR 25 1
-----CGCCCCCTCGGCCCCCC----- morR 19 1
-----CCCCCTCGGCCCCCCCGGC----- morR 19 1
-----TCCGGCCCCCTCGGCCCC----- morR 18 1
-----TCCGGCCCCCTCGGCCCCCC----- morR 21 1
-----GGCCCCCTCGGCCCCCCCG----- morR 19 1

>mmu-mir-222
GGATTAGGGTGCCCTCAGTGGCTCAGTAGCCAGTGTAGATCCTGTCTTTGGTAATCAGCAGCTACATCTGGCTACTGGGTCTCTGGTGGCATCATCTAGCTTCA species len reads
-GATTAGGGTGCCCTCAGTGGC----- morL 21 27
-GATTAGGGTGCCCTCAGTGGCT----- morL 22 7
-GATTAGGGTGCCCTCAGTGG----- morL 20 5
-GATTAGGGTGCCCTCAGTG----- morL 19 4
-----AGGGTGCCCTCAGTGGCTC----- morL 19 1
-GATTAGGGTGCCCTCAGTGGCTC----- morL 23 1
--ATTAGGGTGCCCTCAGTGGC----- morL 20 1
GGATTAGGGTGCCCTCAG----- morL 18 1
-----CTCAGTAGCCAGTGTAGATCCT----- mirL 22 928
-----CTCAGTAGCCAGTGTAGATCC----- mirL 21 221
-----TCAGTAGCCAGTGTAGATCCT----- mirL 21 154
-----TCAGTAGCCAGTGTAGATCCTGT----- mirL 23 137
-----TCAGTAGCCAGTGTAGATCCTG----- mirL 22 103
-----GGCTCAGTAGCCAGTGTAGATCC----- mirL 23 70
-----TCAGTAGCCAGTGTAGATCCTGTC----- mirL 24 69
-----CTCAGTAGCCAGTGTAGATC----- mirL 20 69
-----AGTAGCCAGTGTAGATCCT----- mirL 19 65
-----CTCAGTAGCCAGTGTAGATCCTG----- mirL 23 48
-----CTCAGTAGCCAGTGTAGAT----- mirL 19 38
-----TCAGTAGCCAGTGTAGATCC----- mirL 20 32
-----CTCAGTAGCCAGTGTAGA----- mirL 18 24
-----TCAGTAGCCAGTGTAGATC----- mirL 19 19
-----GGCTCAGTAGCCAGTGTAGAT----- mirL 21 18
-----CTCAGTAGCCAGTGTAGATCCTGT----- mirL 24 18
-----AGTAGCCAGTGTAGATCC----- mirL 18 16
-----GGCTCAGTAGCCAGTGTAGATC----- mirL 22 15
-----TGGCTCAGTAGCCAGTGT----- mirL 18 14

```

```
-----CAGTAGCCAGTGTAGATCCT----- mirL 20 13
-----GGCTCAGTAGCCAGTGTAGATCCT----- mirL 24 10
-----CAGTAGCCAGTGTAGATCCTG----- mirL 21 8
-----GGCTCAGTAGCCAGTGTAGA----- mirL 20 6
-----GGCTCAGTAGCCAGTGTAG----- mirL 19 4
-----CAGTAGCCAGTGTAGATC----- mirL 18 4
-----TCAGTAGCCAGTGTAGATCCTGTCT----- mirL 25 3
-----CAGTAGCCAGTGTAGATCC----- mirL 19 3
-----AGTAGCCAGTGTAGATCCTG----- mirL 20 2
-----CAGTAGCCAGTGTAGATCCTGTC----- mirL 23 2
-----CAGTAGCCAGTGTAGATCCTGT----- mirL 22 2
-----TGGCTCAGTAGCCAGTGTAG----- mirL 20 1
-----GGCTCAGTAGCCAGTGTAGATCCTGT----- mirL 26 1
-----TGTCTTTGGTAATCAGCAG----- loop 19 1
-----AGCTACATCTGGCTACTGGGT----- mirR 21 59986
-----AGCTACATCTGGCTACTGGGTC----- mirR 22 28573
-----AGCTACATCTGGCTACTGGGTCTC----- mirR 24 20907
-----AGCTACATCTGGCTACTGGGTCT----- mirR 23 17211
-----AGCTACATCTGGCTACTGG----- mirR 19 9379
-----AGCTACATCTGGCTACTGGGTCTCT----- mirR 25 5225
-----AGCTACATCTGGCTACTGGG----- mirR 20 3602
-----GCAGCTACATCTGGCTACTGGGT----- mirR 23 967
-----CAGCTACATCTGGCTACTGGGTC----- mirR 23 878
-----GCAGCTACATCTGGCTACTGGGTC----- mirR 24 705
-----CAGCTACATCTGGCTACTGGGT----- mirR 22 643
-----CAGCTACATCTGGCTACTGG----- mirR 20 441
-----GCAGCTACATCTGGCTACTGGG----- mirR 22 302
-----CAGCTACATCTGGCTACTGGG----- mirR 21 239
-----GCAGCTACATCTGGCTACTGG----- mirR 21 231
-----CAGCTACATCTGGCTACTGGGTCT----- mirR 24 210
-----GCTACATCTGGCTACTGGGT----- mirR 20 99
-----CTACATCTGGCTACTGGGTCTC----- mirR 22 93
-----GCTACATCTGGCTACTGGGTCTC----- mirR 23 75
-----GCAGCTACATCTGGCTACTG----- mirR 20 74
-----GCAGCTACATCTGGCTACT----- mirR 19 70
-----GCAGCTACATCTGGCTAC----- mirR 18 66
-----CTACATCTGGCTACTGGGTCT----- mirR 21 64
-----CAGCTACATCTGGCTACTG----- mirR 19 51
-----CTACATCTGGCTACTGGGTCTCT----- mirR 23 50
-----GCTACATCTGGCTACTGGGTC----- mirR 21 46
-----GCTACATCTGGCTACTGGGTCT----- mirR 22 45
-----TACATCTGGCTACTGGGT----- mirR 18 35
-----CAGCTACATCTGGCTACTGGGTCTC----- mirR 25 32
-----CTACATCTGGCTACTGGGTC----- mirR 20 31
-----CTACATCTGGCTACTGGGT----- mirR 19 29
-----TACATCTGGCTACTGGGTCT----- mirR 20 19
```

```

-----TACATCTGGCTACTGGGTCTC----- mirR 21 18
-----CTACATCTGGCTACTGGGTCTCTG----- mirR 24 16
-----CTACATCTGGCTACTGGGTCTCTGG----- mirR 25 15
-----GCTACATCTGGCTACTGGG----- mirR 19 13
-----TACATCTGGCTACTGGGTCT----- mirR 19 12
-----GCTACATCTGGCTACTGG----- mirR 18 10
-----TACATCTGGCTACTGGGTCTCT----- mirR 22 8
-----GCTACATCTGGCTACTGGGTCTCT----- mirR 24 6
-----AGCAGCTACATCTGGCTACTGG----- mirR 22 1
-----TACATCTGGCTACTGGGTCTCTG----- mirR 23 1
-----AGCAGCTACATCTGGCTACTGGGTCT----- mirR 26 1
-----AGCAGCTACATCTGGCTACTGGGTCT----- mirR 25 1
-----GTCTCTGGTGGCATCATC----- morR 18 1
-----TGGTGGCATCATCTAGCTTCA morR 21 1

>mmu-mir-135a-2
CCAAGATAAAATTCAGTCTAGTGCTTTTATGGCTTTTTATTCCTATGTGATCGTAATAAAGTCTCATGTAGGGATGGAAGCCATGAAATACATTGTGAAAATTCATC species len reads
----ATAAATTCAGTCTAGTGCTTT----- morL 20 4
CCAAGATAAAATTCAGTCTAGTGCTTT----- morL 26 1
---AGATAAAATTCAGTCTAGTGCT----- morL 20 1
CCAAGATAAAATTCAGTCTAGTGCTTT----- morL 25 1
---AGATAAAATTCAGTCTAGTGCTTT----- morL 22 1
-----TATGGCTTTTTATTCCTATGT----- mirL 21 66035
-----TATGGCTTTTTATTCCTATGTGA----- mirL 23 38108
-----TATGGCTTTTTATTCCTATGTG----- mirL 22 22786
-----TATGGCTTTTTATTCCTATG----- mirL 20 6806
-----ATGGCTTTTTATTCCTATGT----- mirL 20 1784
-----TATGGCTTTTTATTCCTAT----- mirL 19 1708
-----TATGGCTTTTTATTCCTATGTGAT----- mirL 24 1568
-----ATGGCTTTTTATTCCTATGTGA----- mirL 22 1207
-----ATGGCTTTTTATTCCTATGTG----- mirL 21 880
-----TATGGCTTTTTATTCCTATGTGATC----- mirL 25 689
-----ATGGCTTTTTATTCCTATG----- mirL 19 225
-----ATGGCTTTTTATTCCTAT----- mirL 18 62
-----ATGGCTTTTTATTCCTATGTGAT----- mirL 23 50
-----ATGGCTTTTTATTCCTATGTGATC----- mirL 24 28
-----TTATGGCTTTTTATTCCTATGT----- mirL 22 25
-----GGCTTTTTATTCCTATGT----- mirL 18 24
-----GGCTTTTTATTCCTATGTGA----- mirL 20 21
-----TGGCTTTTTATTCCTATGTGA----- mirL 21 13
-----TGGCTTTTTATTCCTATG----- mirL 18 12
-----TGGCTTTTTATTCCTATGT----- mirL 19 12
-----TTATGGCTTTTTATTCCTATGTG----- mirL 23 8
-----GGCTTTTTATTCCTATGTG----- mirL 19 5
-----CTTTATGGCTTTTTATTCCTATGTGA----- mirL 26 5
-----TGGCTTTTTATTCCTATGTG----- mirL 20 5

```

```

-----TTATGGCTTTTTATTCCCTATG----- mirL 21 4
-----CTTTATGGCTTTTTATTCCCTATGTG----- mirL 25 4
-----TTATGGCTTTTTATTCCCTATGTGA----- mirL 24 2
-----TTTATGGCTTTTTATTCCCTATGT----- mirL 23 2
-----TTTATGGCTTTTTATTCCCTATGTGA----- mirL 25 2
-----TGGCTTTTTATTCCCTATGTGATC----- mirL 23 1
-----TTATGGCTTTTTATTCCCTAT----- mirL 20 1
-----TTTATGGCTTTTTATTCCCTATGTG----- mirL 24 1
-----TGTAGGGATGGAAGCCATGAA----- mirR 21 2095
-----TGTAGGGATGGAAGCCATGAAA----- mirR 22 1380
-----TGTAGGGATGGAAGCCATGA----- mirR 20 1261
-----TGTAGGGATGGAAGCCATG----- mirR 19 339
-----ATGTAGGGATGGAAGCCATGAA----- mirR 22 271
-----ATGTAGGGATGGAAGCCATGA----- mirR 21 186
-----TGTAGGGATGGAAGCCATGAAAT----- mirR 23 152
-----GTAGGGATGGAAGCCATGAA----- mirR 20 140
-----TGTAGGGATGGAAGCCAT----- mirR 18 115
-----GTAGGGATGGAAGCCATGAAA----- mirR 21 88
-----GTAGGGATGGAAGCCATGA----- mirR 19 76
-----ATGTAGGGATGGAAGCCATG----- mirR 20 24
-----ATGTAGGGATGGAAGCCATGAAA----- mirR 23 23
-----GTAGGGATGGAAGCCATG----- mirR 18 23
-----AGGGATGGAAGCCATGAA----- mirR 18 17
-----TGTAGGGATGGAAGCCATGAAATA----- mirR 24 14
-----TAGGGATGGAAGCCATGAAA----- mirR 20 10
-----TAGGGATGGAAGCCATGAA----- mirR 19 10
-----TAGGGATGGAAGCCATGA----- mirR 18 9
-----AGGGATGGAAGCCATGAAA----- mirR 19 9
-----GTAGGGATGGAAGCCATGAAAT----- mirR 22 9
-----ATGTAGGGATGGAAGCCAT----- mirR 19 5
-----ATGTAGGGATGGAAGCCATGAAAT----- mirR 24 4
-----AGGGATGGAAGCCATGAAAT----- mirR 20 3
-----ATGTAGGGATGGAAGCCA----- mirR 18 2
-----GTAGGGATGGAAGCCATGAAATA----- mirR 23 2
-----CATGTAGGGATGGAAGCCATGA----- mirR 22 2
-----TAGGGATGGAAGCCATGAAAT----- mirR 21 1
-----ACATTGTGAAAATTCATC morR 18 1
-----TACATTGTGAAAATTCAT- morR 18 1

>mmu-mir-135a-1
CGCCCCAGGCCTCACTGTTCTCTATGGCTTTTTATTCCCTATGTGATTCTATTGCTCGCTCATATAGGGATTGGAGCCGTGGCGTACGGTGAGGATAAGCCAACAG species len reads
-----CCAGGCCTCACTGTTCTC----- morL 18 2
CGCCCCAGGCCTCACTGTTCTC----- morL 22 1
-----GGCCTCACTGTTCTCTAT----- morL 18 1
-----CCCCAGGCCTCACTGTTCT----- morL 19 1
-----CCAGGCCTCACTGTTCT----- morL 19 1

```

```

-GCCCCAGGCCTCACTGTT----- morL 18 1
-----TATGGCTTTTATTCCCTATGT----- mirL 21 66035
-----TATGGCTTTTATTCCCTATGTGA----- mirL 23 38107
-----TATGGCTTTTATTCCCTATGTG----- mirL 22 22786
-----TATGGCTTTTATTCCCTATG----- mirL 20 6808
-----ATGGCTTTTATTCCCTATGT----- mirL 20 1784
-----TATGGCTTTTATTCCCTAT----- mirL 19 1708
-----TATGGCTTTTATTCCCTATGTGAT----- mirL 24 1568
-----ATGGCTTTTATTCCCTATGTGA----- mirL 22 1207
-----ATGGCTTTTATTCCCTATGTG----- mirL 21 880
-----TATGGCTTTTATTCCCTA----- mirL 18 587
-----ATGGCTTTTATTCCCTATG----- mirL 19 225
-----ATGGCTTTTATTCCCTAT----- mirL 18 62
-----ATGGCTTTTATTCCCTATGTGAT----- mirL 23 50
-----GGCTTTTATTCCCTATGT----- mirL 18 24
-----GGCTTTTATTCCCTATGTGA----- mirL 20 21
-----TGGCTTTTATTCCCTATGTGA----- mirL 21 13
-----TGGCTTTTATTCCCTATG----- mirL 18 12
-----TGGCTTTTATTCCCTATGT----- mirL 19 12
-----ATGGCTTTTATTCCCTATGTGATTC----- mirL 25 6
-----GGCTTTTATTCCCTATGTG----- mirL 19 5
-----TGGCTTTTATTCCCTATGTG----- mirL 20 5
-----CTCTATGGCTTTTATTCCCTATGTGA----- mirL 26 4
-----CTATGGCTTTTATTCCCTATGTG----- mirL 23 3
-----TCTATGGCTTTTATTCCCTATGTG----- mirL 24 2
-----TCTATGGCTTTTATTCCCTATGTGA----- mirL 25 2
-----CTATGGCTTTTATTCCCTATGTGAT----- mirL 25 1
-----CTATGGCTTTTATTCCCTATG----- mirL 21 1
-----TCTATGGCTTTTATTCCCTATGT----- mirL 23 1
-----CTATGGCTTTTATTCCCTATGT----- mirL 22 1
-----TATAGGGATTGGAGCCGTGGCG----- mirR 22 275
-----TATAGGGATTGGAGCCGTGGC----- mirR 21 218
-----TATAGGGATTGGAGCCGTGG----- mirR 20 136
-----TATAGGGATTGGAGCCGTG----- mirR 19 98
-----TATAGGGATTGGAGCCGT----- mirR 18 77
-----ATAGGGATTGGAGCCGTGGCG----- mirR 21 47
-----TATAGGGATTGGAGCCGTGGCGT----- mirR 23 37
-----ATAGGGATTGGAGCCGTGG----- mirR 19 30
-----ATAGGGATTGGAGCCGTGGC----- mirR 20 20
-----TAGGGATTGGAGCCGTGGCG----- mirR 20 16
-----ATAGGGATTGGAGCCGTG----- mirR 18 13
-----AGGGATTGGAGCCGTGGCG----- mirR 19 12
-----TAGGGATTGGAGCCGTGG----- mirR 18 12
-----ATAGGGATTGGAGCCGTGGCGT----- mirR 22 10
-----TAGGGATTGGAGCCGTGGC----- mirR 19 7
-----ATATAGGGATTGGAGCCGTGGCG----- mirR 23 6

```

```

-----ATATAGGGATTGGAGCCGTGGC----- mirR 22 5
-----TATAGGGATTGGAGCCGTGGCGTA----- mirR 24 5
-----ATATAGGGATTGGAGCCGTGG----- mirR 21 4
-----AGGGATTGGAGCCGTGGCGT----- mirR 20 2
-----ATATAGGGATTGGAGCCGTGGCGT----- mirR 24 2
-----TAGGGATTGGAGCCGTGGCGT----- mirR 21 1
-----TAGGGATTGGAGCCGTGGCGTA----- mirR 22 1
-----AGGGATTGGAGCCGTGGC----- mirR 18 1
-----ATATAGGGATTGGAGCCGTGGCGTAC----- mirR 26 1
-----ATATAGGGATTGGAGCCGTG----- mirR 20 1
-----CGGTGAGGATAAGCCAACAG morR 20 1

```

>mmu-mir-140

```

CCCTGTGTCTCTCTCTGTGTCCTGCCAGTGGTTTTACCCTATGGTAGTTACGTCATGCTGTTCTACCACAGGGTAGAACACGGACTGGAGCACCCTCTG species len reads
-----TGTCTCTCTCTGTGTCCTGC----- morL 20 4
-----GTCTCTCTCTGTGTCCTGC----- morL 19 4
-----TGTCTCTCTCTGTGTCCTGCC----- morL 21 2
CCCTGTGTGTCTCTCTCTGTGTCCTGC----- morL 27 2
---TGTGTGTCTCTCTCTGTGTCCT--- morL 22 1
-----TCTCTCTGTGTCCTGCCAG----- morL 19 1
-----GTCTCTCTCTGTGTCCTG----- morL 18 1
-----TGTGTCTCTCTCTGTGTC----- morL 19 1
-----TGTCTCTCTCTGTGTCCTGCCAG----- morL 23 1
-----GTGTCTCTCTCTGTGTC----- morL 18 1
-----CAGTGGTTTTACCCTATGGTAG----- mirL 22 10060
-----CAGTGGTTTTACCCTATGGT----- mirL 20 2157
-----CAGTGGTTTTACCCTATGGTAGG----- mirL 23 1699
-----CAGTGGTTTTACCCTATGGTA----- mirL 21 1199
-----CAGTGGTTTTACCCTATGG----- mirL 19 514
-----CAGTGGTTTTACCCTATGGTAGGT----- mirL 24 242
-----CAGTGGTTTTACCCTATG----- mirL 18 184
-----CCAGTGGTTTTACCCTATGGTA----- mirL 22 100
-----CCAGTGGTTTTACCCTATGGT----- mirL 21 94
-----AGTGGTTTTACCCTATGGTAG----- mirL 21 66
-----CCAGTGGTTTTACCCTATGGTAG----- mirL 23 53
-----AGTGGTTTTACCCTATGGTAGG----- mirL 22 20
-----CCAGTGGTTTTACCCTATGG----- mirL 20 14
-----CCAGTGGTTTTACCCTATGGTAGG----- mirL 24 11
-----AGTGGTTTTACCCTATGGTA----- mirL 20 7
-----CCAGTGGTTTTACCCTATG----- mirL 19 7
-----AGTGGTTTTACCCTATGGTAGGT----- mirL 23 6
-----AGTGGTTTTACCCTATGG----- mirL 18 6
-----CCAGTGGTTTTACCCTAT----- mirL 18 3
-----TGGTTTTACCCTATGGTAG----- mirL 19 2
-----GTGGTTTTACCCTATGGTAGG----- mirL 21 2
-----GTGGTTTTACCCTATGGTAG----- mirL 20 1

```

```

-----AGTGGTTTTACCCATGGTAGGTT----- mirL 24 1
-----AGGTTACGTCATGCTGTT----- loop 18 1
-----GGTTACGTCATGCTGTT----- loop 18 1
-----ACCACAGGGTAGAACCACGGAC----- mirR 22 49323
-----ACCACAGGGTAGAACCACGGACA----- mirR 23 17150
-----TACCACAGGGTAGAACCACGGAC----- mirR 23 12809
-----TACCACAGGGTAGAACCACGGACA----- mirR 24 9971
-----ACCACAGGGTAGAACCACGGGA----- mirR 21 8778
-----TACCACAGGGTAGAACCACGGGA----- mirR 22 5326
-----ACCACAGGGTAGAACCACGGACAG----- mirR 24 3996
-----TACCACAGGGTAGAACCACGG----- mirR 21 2742
-----ACCACAGGGTAGAACCACGG----- mirR 20 2632
-----TACCACAGGGTAGAACCACGGACAG----- mirR 25 2363
-----CCACAGGGTAGAACCACGGACA----- mirR 22 2166
-----ACCACAGGGTAGAACCAC----- mirR 18 1715
-----CCACAGGGTAGAACCACGGAC----- mirR 21 1309
-----TACCACAGGGTAGAACCACG----- mirR 20 1286
-----ACCACAGGGTAGAACCACG----- mirR 19 922
-----TACCACAGGGTAGAACCAC----- mirR 19 865
-----CCACAGGGTAGAACCACGGACAG----- mirR 23 514
-----CCACAGGGTAGAACCACGGGA----- mirR 20 308
-----CACAGGGTAGAACCACGGACA----- mirR 21 156
-----CCACAGGGTAGAACCACGG----- mirR 19 125
-----ACAGGGTAGAACCACGGACA----- mirR 20 101
-----CCACAGGGTAGAACCACG----- mirR 18 77
-----CACAGGGTAGAACCACGGAC----- mirR 20 54
-----CCACAGGGTAGAACCACGGACAG----- mirR 24 51
-----ACAGGGTAGAACCACGGGA----- mirR 18 45
-----CACAGGGTAGAACCACGGGA----- mirR 19 45
-----CACAGGGTAGAACCACGGACAG----- mirR 22 43
-----CACAGGGTAGAACCACGG----- mirR 18 39
-----ACAGGGTAGAACCACGGAC----- mirR 19 39
-----ACAGGGTAGAACCACGGACAG----- mirR 21 21
-----CTACCACAGGGTAGAACCACGGACA----- mirR 25 16
-----CTACCACAGGGTAGAACCACGGAC----- mirR 24 15
-----TCTACCACAGGGTAGAACCACGGAC----- mirR 25 4
-----ACAGGGTAGAACCACGGACAG----- mirR 22 4
-----CACAGGGTAGAACCACGGACAG----- mirR 23 4
-----CTACCACAGGGTAGAACCACG----- mirR 21 3
-----TCTACCACAGGGTAGAAC----- mirR 18 2
-----CACAGGGTAGAACCACGGACAGGG----- mirR 24 2
-----TCTACCACAGGGTAGAACCACGGACA----- mirR 26 2
-----TCTACCACAGGGTAGAACCAC----- mirR 21 2
-----TCTACCACAGGGTAGAACCACGGACAG----- mirR 27 1
-----CTACCACAGGGTAGAACCACGG----- mirR 22 1
-----CTACCACAGGGTAGAACCACGGGA----- mirR 23 1

```

```

-----TCTACCACAGGGTAGAACCA----- mirR 20 1
-----CTACCACAGGGTAGAACCCAC----- mirR 20 1
-----TCTACCACAGGGTAGAAC----- mirR 19 1
-----ACAGGGTAGAACCCACGGACAGGGT----- mirR 24 1
-----GTACTGGAGCACCCCTCTG----- morR 18 2

>mmu-mir-136
AACGGTGTGGATGAGCCCTCGGAGACTCCATTTGTTTGGATGATGGATTCTTAAGCTCCATCATCGTCTCAAATGAGTCTTCAGAGGGTTCTATCATGTCGTCGGTTG species len reads
----GTGTTGGATGAGCCCTCGGA----- morL 20 8
----TGTGGATGAGCCCTCGGA----- morL 19 6
-----TGGATGAGCCCTCGGAGGA----- morL 19 3
-----TGGATGAGCCCTCGGAGG----- morL 18 2
-ACGGTGTGGATGAGCCCTCGGA----- morL 23 2
----TGGATGAGCCCTCGGAGGA----- morL 20 2
----TGTGGATGAGCCCTCGGAGGAC----- morL 23 1
AACGGTGTGGATGAGCCCTCGGAGG----- morL 26 1
-----GGATGAGCCCTCGGAGGA----- morL 18 1
----TGGATGAGCCCTCGGAGG----- morL 19 1
----GTTGGATGAGCCCTCGGA----- morL 18 1
-----ACTCCATTTGTTTGGATGATGGA----- mirL 23 26299
-----ACTCCATTTGTTTGGATGATGG----- mirL 22 20681
-----ACTCCATTTGTTTGGATGATG----- mirL 21 16036
-----ACTCCATTTGTTTGGATGAT----- mirL 20 14783
-----ACTCCATTTGTTTGGATGA----- mirL 19 5674
-----ACTCCATTTGTTTGGATG----- mirL 18 4908
-----ACTCCATTTGTTTGGATGGAT----- mirL 24 4626
-----GGACTCCATTTGTTTGGATGAT----- mirL 22 4108
-----GGACTCCATTTGTTTGGATGA----- mirL 21 2257
-----AGGACTCCATTTGTTTGGATGA----- mirL 22 1076
-----AGGACTCCATTTGTTTGGATGAT----- mirL 23 921
-----GGACTCCATTTGTTTGGATGATG----- mirL 23 490
-----GACTCCATTTGTTTGGATGAT----- mirL 21 254
-----GGACTCCATTTGTTTGGATG----- mirL 20 210
-----CTCCATTTGTTTGGATGATGGA----- mirL 22 199
-----GGACTCCATTTGTTTGGATGATGG----- mirL 24 121
-----CTCCATTTGTTTGGATGATGG----- mirL 21 102
-----GACTCCATTTGTTTGGATGATG----- mirL 22 90
-----CTCCATTTGTTTGGATGAT----- mirL 19 90
-----CTCCATTTGTTTGGATGATG----- mirL 20 87
-----GGACTCCATTTGTTTGGAT----- mirL 19 73
-----AGGACTCCATTTGTTTGGATG----- mirL 21 72
-----GACTCCATTTGTTTGGATGA----- mirL 20 67
-----GACTCCATTTGTTTGGATGATGG----- mirL 23 57
-----AGGACTCCATTTGTTTGGAT----- mirL 20 48
-----GGACTCCATTTGTTTGGATGATGGA----- mirL 25 40
-----AGGACTCCATTTGTTTGGATGATG----- mirL 24 39

```



```

-----AGGACTCCATTTGTTTTG----- mirL 18 38
-----CTCCATTTGTTTTGATGATGGAT----- mirL 23 38
-----AGGACTCCATTTGTTTTGA----- mirL 19 29
-----CTCCATTTGTTTTGATGA----- mirL 18 28
-----GACTCCATTTGTTTTGATG----- mirL 19 24
-----GACTCCATTTGTTTTGATGATGGA----- mirL 24 22
-----GACTCCATTTGTTTTGATGATGGAT----- mirL 25 13
-----CCATTTGTTTTGATGATGG----- mirL 19 12
-----CCATTTGTTTTGATGATGGA----- mirL 20 10
-----CTCCATTTGTTTTGATGATGGATTC----- mirL 25 9
-----TCCATTTGTTTTGATGATGGA----- mirL 21 6
-----TCCATTTGTTTTGATGATGG----- mirL 20 6
-----CCATTTGTTTTGATGATG----- mirL 18 6
-----TCCATTTGTTTTGATGAT----- mirL 18 3
-----CCATTTGTTTTGATGATGGATT----- mirL 22 2
-----CCATTTGTTTTGATGATGGAT----- mirL 21 2
-----TCCATTTGTTTTGATGATG----- mirL 19 2
-----TCCATTTGTTTTGATGATGGATTC----- mirL 24 1
-----TCCATTTGTTTTGATGATGGAT----- mirL 22 1
-----CATCATCGTCTCAAATGAGTCT----- mirR 22 11711
-----ATCATCGTCTCAAATGAGTCT----- mirR 21 5408
-----TCATCGTCTCAAATGAGTCTT----- mirR 21 3015
-----CATCGTCTCAAATGAGTCTTC----- mirR 21 2758
-----CATCGTCTCAAATGAGTCTTCA----- mirR 22 2469
-----TCATCGTCTCAAATGAGTCTTC----- mirR 22 2464
-----ATCATCGTCTCAAATGAGTCTT----- mirR 22 1758
-----CATCATCGTCTCAAATGAGTCTT----- mirR 23 1588
-----ATCATCGTCTCAAATGAGTCTTC----- mirR 23 920
-----TCATCGTCTCAAATGAGTCTTCA----- mirR 23 912
-----CATCATCGTCTCAAATGAGTC----- mirR 21 729
-----CATCGTCTCAAATGAGTCTT----- mirR 20 625
-----CATCATCGTCTCAAATGAGTCTTC----- mirR 24 468
-----ATCATCGTCTCAAATGAGTC----- mirR 20 428
-----TCATCGTCTCAAATGAGTCT----- mirR 20 422
-----CATCATCGTCTCAAATGAGT----- mirR 20 315
-----ATCATCGTCTCAAATGAGT----- mirR 19 212
-----TCATCGTCTCAAATGAGTC----- mirR 19 178
-----CATCGTCTCAAATGAGTCTTCAG----- mirR 23 138
-----CATCGTCTCAAATGAGTCT----- mirR 19 132
-----ATCATCGTCTCAAATGAGTCTTCA----- mirR 24 122
-----CATCATCGTCTCAAATGAG----- mirR 19 79
-----CATCATCGTCTCAAATGA----- mirR 18 67
-----TCATCGTCTCAAATGAGTCTTCAG----- mirR 24 54
-----CATCGTCTCAAATGAGTC----- mirR 18 49
-----TCATCGTCTCAAATGAGT----- mirR 18 42
-----ATCATCGTCTCAAATGAG----- mirR 18 35

```

```

-----CATCGTCTCAAATGAGTCTTCAGA----- mirR 24 13
-----CCATCATCGTCTCAAATGAGTCT----- mirR 23 5
-----CTCCATCATCGTCTCAAA----- mirR 18 2
-----CTCCATCATCGTCTCAAATGAGTCTTC----- mirR 27 1
-----CTCCATCATCGTCTCAAATGAG----- mirR 22 1
-----CTCCATCATCGTCTCAAATGAGTCT----- mirR 25 1
-----CTCCATCATCGTCTCAAATGAGTC----- mirR 24 1
-----CTCCATCATCGTCTCAAATGAGT----- mirR 23 1
-----TCCATCATCGTCTCAAAT----- mirR 18 1
-----TCAGAGGGTTCTATCATGTCGTCGGTTG morR 28 1
-----TCTTCAGAGGGTTCTATC----- morR 18 1

>mmu-let-7d
GCAAGAATAAAATGGGTTCCCTAGGAAGAGGTAGTAGGTTGCATAGTTTTAGGGCAGAGATTTGCCACAAGGAGTTAACTATACGACCTGCTGCCTTTCTTAGGGCCTTATTATACCAGCATA species len re
-----ATAAAATGGGTTCCCTAGGA----- morL 19 5
-----AATAAAATGGGTTCCCTAGGA----- morL 20 3
-----AATAAAATGGGTTCCCTAGGAA----- morL 21 2
-----TAAAATGGGTTCCCTAGGA----- morL 18 2
GCAAGAATAAAATGGGTTCCCTAG----- morL 23 2
-----AGAATAAAATGGGTTCCCTAGGA----- morL 22 1
-----AGAATAAAATGGGTTCCCTA----- morL 19 1
-----AGAATAAAATGGGTTCCCTAG----- morL 20 1
-----AAAATGGGTTCCCTAGGAAGA----- morL 20 1
-----AGAGGTAGTAGGTTGCATAGTT----- mirL 22 47404
-----AGAGGTAGTAGGTTGCATAG----- mirL 20 14394
-----AGAGGTAGTAGGTTGCATAGTTT----- mirL 23 13871
-----AGAGGTAGTAGGTTGCATAGT----- mirL 21 13846
-----AGAGGTAGTAGGTTGCATA----- mirL 19 6858
-----AGAGGTAGTAGGTTGCATAGTTTT----- mirL 24 3339
-----AGAGGTAGTAGGTTGCAT----- mirL 18 2718
-----GAGGTAGTAGGTTGCATAG----- mirL 19 1013
-----GAGGTAGTAGGTTGCATAGTT----- mirL 21 404
-----GAGGTAGTAGGTTGCATA----- mirL 18 289
-----GAGGTAGTAGGTTGCATAGT----- mirL 20 253
-----AAGAGGTAGTAGGTTGCATAGTT----- mirL 23 185
-----AAGAGGTAGTAGGTTGCATAG----- mirL 21 148
-----AAGAGGTAGTAGGTTGCATAGT----- mirL 22 118
-----GAGGTAGTAGGTTGCATAGTTT----- mirL 22 77
-----AGGTAGTAGGTTGCATAG----- mirL 18 77
-----AAGAGGTAGTAGGTTGCATA----- mirL 20 73
-----AAGAGGTAGTAGGTTGCAT----- mirL 19 46
-----GGTAGTAGGTTGCATAGTT----- mirL 19 40
-----AGGTAGTAGGTTGCATAGTT----- mirL 20 35
-----AAGAGGTAGTAGGTTGCATAGTTT----- mirL 24 31
-----GGTAGTAGGTTGCATAGT----- mirL 18 19
-----GAGGTAGTAGGTTGCATAGTTT----- mirL 23 19

```

```

-----AGGTAGTAGGTTGCATAGT----- mirL 19 18
-----GGTAGTAGGTTGCATAGTTT----- mirL 20 16
-----AAGAGGTAGTAGGTTGCA----- mirL 18 12
-----AGGTAGTAGGTTGCATAGTTT----- mirL 21 7
-----GAAGAGGTAGTAGGTTGCATAGT----- mirL 23 1
-----GGAAGAGGTAGTAGGTTG----- mirL 18 1
-----GAAGAGGTAGTAGGTTGCA----- mirL 19 1
-----GGTAGTAGGTTGCATAGTTT----- mirL 22 1
-----GAAGAGGTAGTAGGTTGCATAG----- mirL 22 1
-----GGTAGTAGGTTGCATAGTTT----- mirL 23 1
-----TTAGGGCAGAGATTTTGCCACAAGGAGTTAAC----- loop 33 1
-----CTATACGACCTGCTGCCTTTCT----- mirR 22 20089
-----CTATACGACCTGCTGCCTTTCT----- mirR 21 6426
-----CTATACGACCTGCTGCCTTTCT----- mirR 20 2787
-----CTATACGACCTGCTGCCTTTCT----- mirR 23 1720
-----CTATACGACCTGCTGCCTTTCT----- mirR 19 1009
-----TATACGACCTGCTGCCTTTCT----- mirR 21 692
-----CTATACGACCTGCTGCCTTTCT----- mirR 18 341
-----TATACGACCTGCTGCCTTTCT----- mirR 20 168
-----CTATACGACCTGCTGCCTTTCT----- mirR 24 141
-----TATACGACCTGCTGCCTTTCT----- mirR 19 97
-----TATACGACCTGCTGCCTTTCT----- mirR 22 86
-----ATACGACCTGCTGCCTTTCT----- mirR 20 44
-----TATACGACCTGCTGCCTTTCT----- mirR 23 31
-----TATACGACCTGCTGCCTTTCT----- mirR 18 22
-----ATACGACCTGCTGCCTTTCT----- mirR 19 19
-----ATACGACCTGCTGCCTTTCT----- mirR 18 11
-----ATACGACCTGCTGCCTTTCT----- mirR 21 10
-----TATACGACCTGCTGCCTTTCTTAG----- mirR 24 5
-----TACGACCTGCTGCCTTTCT----- mirR 19 4
-----AACTATACGACCTGCTGCCTTTCT----- mirR 23 3
-----ACTATACGACCTGCTGCCTTTCT----- mirR 23 3
-----TAACTATACGACCTGCTGCCTTTCT----- mirR 24 3
-----ATACGACCTGCTGCCTTTCT----- mirR 22 3
-----ACTATACGACCTGCTGCCTTTCT----- mirR 22 3
-----TACGACCTGCTGCCTTTCT----- mirR 18 2
-----AACTATACGACCTGCTGCCTTTCT----- mirR 22 2
-----TACGACCTGCTGCCTTTCT----- mirR 20 1
-----ACTATACGACCTGCTGCCTTTCT----- mirR 21 1
-----TAACTATACGACCTGCTGCCT----- mirR 21 1
-----GGCCTTATTATACCAGCATA morR 20 1
-----TTAGGGCCTTATTATACCAG----- morR 20 1

```

>mmu-mir-21

```

ATGGCTGTACCACCTGTTCGGATAGCTTATCAGACTGATGTTGACTGTTGAATCTCATGGCAACAGCAGTCGATGGGCTGTCTGACATTTTGGTATCTTTCATCTGACCATCC species len reads
-----CTGTACCACCTGTTCGGA----- morL 18 38

```

```

---GCTGTACCACCTTGTCGGA----- morL 19 11
-----TGTACCACCTTGTCGGAT----- morL 18 3
-----TGTACCACCTTGTCGGATA----- morL 19 2
--GGCTGTACCACCTTGTCGGA----- morL 20 2
-TGGCTGTACCACCTTGTCGGA----- morL 21 1
ATGGCTGTACCACCTTGTCGGA----- morL 22 1
-TGGCTGTACCACCTTGTCGGAT----- morL 22 1
--GCTGTACCACCTTGTCGGAT----- morL 20 1
ATGGCTGTACCACCTTGTCGGAT----- morL 23 1
----CTGTACCACCTTGTCGGAT----- morL 19 1
---GCTGTACCACCTTGTCGG----- morL 18 1
-----TAGCTTATCAGACTGATGTTGAC----- mirL 23 99752
-----TAGCTTATCAGACTGATGTTGA----- mirL 22 13443
-----TAGCTTATCAGACTGATGTTG----- mirL 21 5622
-----TAGCTTATCAGACTGATGT----- mirL 19 4098
-----AGCTTATCAGACTGATGTTGAC----- mirL 22 3918
-----TAGCTTATCAGACTGATGTT----- mirL 20 3722
-----TAGCTTATCAGACTGATGTTGACT----- mirL 24 2896
-----TAGCTTATCAGACTGATG----- mirL 18 1690
-----AGCTTATCAGACTGATGTTGA----- mirL 21 870
-----AGCTTATCAGACTGATGTTG----- mirL 20 330
-----ATAGCTTATCAGACTGATGTTGA----- mirL 23 279
-----ATAGCTTATCAGACTGATGTTGAC----- mirL 24 178
-----AGCTTATCAGACTGATGT----- mirL 18 164
-----AGCTTATCAGACTGATGTTGACT----- mirL 23 145
-----AGCTTATCAGACTGATGTT----- mirL 19 110
-----AGCTTATCAGACTGATGTTGACTG----- mirL 24 57
-----GCTTATCAGACTGATGTTGAC----- mirL 21 35
-----CTTATCAGACTGATGTTGA----- mirL 19 24
-----ATAGCTTATCAGACTGATGTT----- mirL 21 20
-----CTTATCAGACTGATGTTGAC----- mirL 20 16
-----ATAGCTTATCAGACTGATGT----- mirL 20 15
-----ATAGCTTATCAGACTGATGTTG----- mirL 22 14
-----GCTTATCAGACTGATGTTGA----- mirL 20 9
-----ATAGCTTATCAGACTGAT----- mirL 18 8
-----ATAGCTTATCAGACTGATG----- mirL 19 6
-----GCTTATCAGACTGATGTTG----- mirL 19 5
-----CTTATCAGACTGATGTTG----- mirL 18 2
-----GCTTATCAGACTGATGTT----- mirL 18 2
-----GGATAGCTTATCAGACTGATGTT----- mirL 23 2
-----GCTTATCAGACTGATGTTGACT----- mirL 22 1
-----ACTGTTGAATCTCATGGC----- loop 18 1
-----CAACAGCAGTCGATGGGCTGTC----- mirR 22 319
-----CAACAGCAGTCGATGGGCTGTCT----- mirR 23 184
-----CAACAGCAGTCGATGGGCTGT----- mirR 21 177
-----AACAGCAGTCGATGGGCTGTCT----- mirR 22 83

```

```

-----CAACAGCAGTCGATGGGCT----- mirR 19 44
-----CAACAGCAGTCGATGGGC----- mirR 18 38
-----ACAGCAGTCGATGGGCTGTCT----- mirR 21 37
-----CAACAGCAGTCGATGGGCTGTCTG----- mirR 24 36
-----CAACAGCAGTCGATGGGCTG----- mirR 20 29
-----AACAGCAGTCGATGGGCTGTCTG----- mirR 23 25
-----AACAGCAGTCGATGGGCTGTC----- mirR 21 20
-----ACAGCAGTCGATGGGCTGTC----- mirR 20 19
-----CAGCAGTCGATGGGCTGTC----- mirR 19 15
-----AACAGCAGTCGATGGGCTGTCTGA----- mirR 24 12
-----ACAGCAGTCGATGGGCTGTCTG----- mirR 22 7
-----AACAGCAGTCGATGGGCTGT----- mirR 20 7
-----ACAGCAGTCGATGGGCTGT----- mirR 19 6
-----CAGCAGTCGATGGGCTGTC----- mirR 20 4
-----ACAGCAGTCGATGGGCTGTCTGA----- mirR 23 4
-----AACAGCAGTCGATGGGCTG----- mirR 19 3
-----AACAGCAGTCGATGGGCTGTCTGAC----- mirR 25 3
-----CAGCAGTCGATGGGCTGT----- mirR 18 2
-----ACAGCAGTCGATGGGCTGTCTGAC----- mirR 24 2
-----ACAGCAGTCGATGGGCTGTCTGACAT----- mirR 26 1
-----GCAACAGCAGTCGATGGG----- mirR 18 1
-----TGACATTTGGTATCTTTTCATC----- morR 22 1
-----TGACATTTGGTATCTTTTCATCTGACCATCC morR 31 1
-----ACATTTGGTATCTTTCA----- morR 18 1
-----TGACATTTGGTATCTTT----- morR 18 1

```

>mmu-mir-382

```

TTTTCTGTGGTACTTGAAGAGAAGTTGTTTCGTGGTGGATTTCGCTTTACTTGTGACGAATCATTCACGGACAACACTTTTTTTCAGTACCAAATGCTA species len reads
TTTTCTGTGGTACTTGAAG----- morL 18 1
-----CTGTGGTACTTGAAGAGA----- morL 18 1
-----GAAGTTGTTTCGTGGTGGATTC----- mirL 21 31056
-----GAAGTTGTTTCGTGGTGGATTCG----- mirL 22 29362
-----GAAGTTGTTTCGTGGTGGATTCGC----- mirL 23 15322
-----GAAGTTGTTTCGTGGTGGATT----- mirL 20 10750
-----GAAGTTGTTTCGTGGTGGAT----- mirL 19 4253
-----AAGTTGTTTCGTGGTGGATTCG----- mirL 21 1753
-----GAAGTTGTTTCGTGGTGGGA----- mirL 18 1197
-----AAGTTGTTTCGTGGTGGATTCGC----- mirL 22 974
-----GAAGTTGTTTCGTGGTGGATTCGCT----- mirL 24 948
-----AAGTTGTTTCGTGGTGGATTC----- mirL 20 761
-----AGTTGTTTCGTGGTGGATTCGCT----- mirL 22 684
-----AGTTGTTTCGTGGTGGATTCGC----- mirL 21 609
-----AAGTTGTTTCGTGGTGGATT----- mirL 19 464
-----AGTTGTTTCGTGGTGGATT----- mirL 18 265
-----AGTTGTTTCGTGGTGGATTCG----- mirL 20 263
-----AGTTGTTTCGTGGTGGATTC----- mirL 19 250

```

```

-----AGTTGTTTCGTTGGTGGATTTCGCTT----- mirL 23 161
-----AGTTGTTTCGTTGGTGGATTTCGCTTT----- mirL 24 120
-----AAGTTGTTTCGTTGGTGGAT----- mirL 18 105
-----AAGTTGTTTCGTTGGTGGATTTCGCT----- mirL 23 62
-----AGAAGTTGTTTCGTTGGTGGATTTC----- mirL 22 32
-----GTTGTTTCGTTGGTGGATTTC----- mirL 18 26
-----AAGTTGTTTCGTTGGTGGATTTCGCTTT----- mirL 25 20
-----GTTGTTTCGTTGGTGGATTTCGC----- mirL 20 11
-----AGAAGTTGTTTCGTTGGTGGATTTC----- mirL 21 10
-----GTTGTTTCGTTGGTGGATTTCG----- mirL 19 7
-----AGAAGTTGTTTCGTTGGTGGATTTCG----- mirL 23 7
-----AGAAGTTGTTTCGTTGGTGG----- mirL 18 5
-----AGAAGTTGTTTCGTTGGTGGAT----- mirL 20 5
-----AGAAGTTGTTTCGTTGGTGG----- mirL 19 3
-----AGAAGTTGTTTCGTTGGTGGATTTCGC----- mirL 24 3
-----GTTGTTTCGTTGGTGGATTTCGCT----- mirL 21 1
-----GCTTTACTTGTGACGAAT----- loop 18 1
-----CGCTTTACTTGTGACGAA----- loop 18 1
-----AATCATTACGGACAACACTTT----- mirR 22 24916
-----AATCATTACGGACAACACTT----- mirR 21 4618
-----AATCATTACGGACAACACTTTT----- mirR 23 2662
-----AATCATTACGGACAACAC----- mirR 19 1114
-----AATCATTACGGACAACACT----- mirR 20 940
-----ATCATTACGGACAACACTTT----- mirR 21 523
-----AATCATTACGGACAACA----- mirR 18 420
-----TCATTACGGACAACACTTTT----- mirR 22 367
-----AATCATTACGGACAACACTTTT----- mirR 24 277
-----TCATTACGGACAACACTTTT----- mirR 21 223
-----TCATTACGGACAACACTTT----- mirR 20 190
-----ATCATTACGGACAACACTTTT----- mirR 22 151
-----TCATTACGGACAACACTT----- mirR 19 95
-----CATTACGGACAACACTTTT----- mirR 21 90
-----ATCATTACGGACAACACTT----- mirR 20 60
-----ATCATTACGGACAACACTTTT----- mirR 23 57
-----TCATTACGGACAACACT----- mirR 18 44
-----CATTACGGACAACACTTT----- mirR 19 39
-----CATTACGGACAACACTT----- mirR 18 35
-----CATTACGGACAACACTTTT----- mirR 20 35
-----CGAATCATTACGGACAACACTT----- mirR 23 31
-----ATCATTACGGACAACACT----- mirR 19 26
-----CGAATCATTACGGACAACACT----- mirR 22 22
-----ATCATTACGGACAACAC----- mirR 18 21
-----TCATTACGGACAACACTTTT----- mirR 23 10
-----CGAATCATTACGGACA----- mirR 18 8
-----CGAATCATTACGGACAACAC----- mirR 21 7
-----CGAATCATTACGGACAACACTTT----- mirR 24 7

```

```

-----GAATCATTACGGACAACACTT----- mirR 22 5
-----CGAATCATTACGGACAAC----- mirR 19 3
-----CGAATCATTACGGACAACA----- mirR 20 2
-----GAATCATTACGGACAACACTTT----- mirR 23 2
-----ATCATTACGGACAACACTTTTTTC----- mirR 25 2
-----ACGAATCATTACGGACA----- mirR 18 1
-----TTTTTTTCAGTACCAAATG--- morR 18 1
-----TTTCAGTACCAAATGCTA morR 18 1

```

>mmu-mir-34a

| CTTTGGCAGTGTCTTAGCTGGTTGTTGTGAGTATTAGCTAAGGAAGCAATCAGCAAGTATACTGCCCTAGAAAGTGCTGCACATTGTT | species | len   | reads |
|------------------------------------------------------------------------------------------|---------|-------|-------|
| ---TGGCAGTGTCTTAGCTGGTTGT-----                                                           | mirL 22 | 81589 |       |
| ---TGGCAGTGTCTTAGCTGGTTGTT-----                                                          | mirL 23 | 10680 |       |
| ---TGGCAGTGTCTTAGCTGGTTG-----                                                            | mirL 21 | 5970  |       |
| ---TGGCAGTGTCTTAGCTGGTTGTTG-----                                                         | mirL 24 | 3904  |       |
| ---TGGCAGTGTCTTAGCTGGTT-----                                                             | mirL 20 | 3061  |       |
| ---GGCAGTGTCTTAGCTGGTTGT-----                                                            | mirL 21 | 1817  |       |
| ---TGGCAGTGTCTTAGCTGGTT-----                                                             | mirL 19 | 1261  |       |
| ---TGGCAGTGTCTTAGCTGGTTGTTGT-----                                                        | mirL 25 | 669   |       |
| ---GGCAGTGTCTTAGCTGGTTGTT-----                                                           | mirL 22 | 642   |       |
| ---GGCAGTGTCTTAGCTGGTTG-----                                                             | mirL 20 | 161   |       |
| ---GGCAGTGTCTTAGCTGGTTGTTG-----                                                          | mirL 23 | 117   |       |
| ---GCAGTGTCTTAGCTGGTTGT-----                                                             | mirL 20 | 113   |       |
| ---TTGGCAGTGTCTTAGCTGGTTGT-----                                                          | mirL 23 | 105   |       |
| ---GGCAGTGTCTTAGCTGGTT-----                                                              | mirL 19 | 79    |       |
| ---TTTGGCAGTGTCTTAGCTGGTTGT-----                                                         | mirL 24 | 63    |       |
| ---TTTGGCAGTGTCTTAGCTGGTT-----                                                           | mirL 22 | 42    |       |
| ---TTGGCAGTGTCTTAGCTGGTTG-----                                                           | mirL 22 | 31    |       |
| ---GCAGTGTCTTAGCTGGTTG-----                                                              | mirL 19 | 31    |       |
| ---CAGTGTCTTAGCTGGTTGT-----                                                              | mirL 19 | 28    |       |
| ---GCAGTGTCTTAGCTGGTTGTT-----                                                            | mirL 21 | 27    |       |
| ---TTTGGCAGTGTCTTAGCTGGTTG-----                                                          | mirL 23 | 27    |       |
| ---GGCAGTGTCTTAGCTGGTT-----                                                              | mirL 18 | 22    |       |
| ---GGCAGTGTCTTAGCTGGTTGTTGT-----                                                         | mirL 24 | 10    |       |
| ---CAGTGTCTTAGCTGGTTG-----                                                               | mirL 18 | 8     |       |
| ---TTGGCAGTGTCTTAGCTGGTTGTT-----                                                         | mirL 24 | 8     |       |
| ---TTGGCAGTGTCTTAGCTGGTT-----                                                            | mirL 21 | 8     |       |
| ---GCAGTGTCTTAGCTGGTT-----                                                               | mirL 18 | 7     |       |
| ---TTGGCAGTGTCTTAGCTGGTTGTTG-----                                                        | mirL 25 | 6     |       |
| ---TTTGGCAGTGTCTTAGCTGGTTGTT-----                                                        | mirL 25 | 6     |       |
| ---TTTGGCAGTGTCTTAGCTGG-----                                                             | mirL 20 | 5     |       |
| CTTTGGCAGTGTCTTAGCTGGTTGT-----                                                           | mirL 25 | 4     |       |
| ---TTGGCAGTGTCTTAGCTGG-----                                                              | mirL 19 | 3     |       |
| ---TTTGGCAGTGTCTTAGCTGGTT-----                                                           | mirL 21 | 3     |       |
| ---TTGGCAGTGTCTTAGCTG-----                                                               | mirL 18 | 2     |       |
| ---TTTGGCAGTGTCTTAGCTGGTTGTTG-----                                                       | mirL 26 | 2     |       |

```

-----GCAGTGTCTTAGCTGGTTGTTG----- mirL 22 2
-----CAGTGTCTTAGCTGGTTGTT----- mirL 20 1
CTTTGGCAGTGTCTTAGCTGGTTGTT----- mirL 26 1
-----TGTGAGTATTAGCTAAGGAAGC----- loop 22 1
-----CAATCAGCAAGTATACTGCCCT----- mirR 22 6670
-----AATCAGCAAGTATACTGCCCTA----- mirR 22 2868
-----CAATCAGCAAGTATACTGCCCTA----- mirR 23 1949
-----CAATCAGCAAGTATACTGCCCT----- mirR 21 852
-----AATCAGCAAGTATACTGCCCTAG----- mirR 23 487
-----CAATCAGCAAGTATACTGCCCTAG----- mirR 24 448
-----AATCAGCAAGTATACTGCCCT----- mirR 21 256
-----CAATCAGCAAGTATACTGCC----- mirR 20 245
-----ATCAGCAAGTATACTGCCCT----- mirR 20 205
-----AATCAGCAAGTATACTGCCCT----- mirR 20 124
-----TCAGCAAGTATACTGCCCT----- mirR 19 110
-----ATCAGCAAGTATACTGCCCTA----- mirR 21 76
-----ATCAGCAAGTATACTGCCCT----- mirR 19 48
-----AATCAGCAAGTATACTGCC----- mirR 19 47
-----CAATCAGCAAGTATACTGCC----- mirR 19 41
-----AATCAGCAAGTATACTGCCCTAGA----- mirR 24 39
-----CAATCAGCAAGTATACTG----- mirR 18 28
-----TCAGCAAGTATACTGCCCT----- mirR 18 19
-----ATCAGCAAGTATACTGCCCTAG----- mirR 22 18
-----TCAGCAAGTATACTGCCCTA----- mirR 20 17
-----ATCAGCAAGTATACTGCCCTAGA----- mirR 23 17
-----ATCAGCAAGTATACTGCC----- mirR 18 13
-----GCAATCAGCAAGTATACTGCCCT----- mirR 23 5
-----AATCAGCAAGTATACTGC----- mirR 18 5
-----TCAGCAAGTATACTGCCCTAGA----- mirR 22 3
-----GCAATCAGCAAGTATACTGCCCTA----- mirR 24 3
-----TCAGCAAGTATACTGCCCTAG----- mirR 21 2
-----AGCAATCAGCAAGTATAC----- mirR 18 1
-----TCAGCAAGTATACTGCCCTAGAA----- mirR 23 1
-----CTAGAAGTGTGCTGCACATT----- morR 18 1
-----GAAGTGTGCTGCACATTGTT morR 18 1

```

>mmu-mir-484

```

CCTCGCGGCCCTGCAGCCTCGTCAGGCTCAGTCCCCTCCCGATAAACCTCAAAATAGGGTCTTACCTAGGGGGCTGGCGGCGTATTTTTTTTAGCAGGAACCCAGTTTAGGAGTTCTCACTACTGGTTTGATG specie
--TCGCGGCCCTGCAGCCTCGTCA----- morL 2
--GCCCCTGCAGCCTCGTCA----- morL 1
--TCGCGGCCCTGCAGCCTCGTC----- morL 2
--TCGCGGCCCTGCAGCCTCGT----- morL 2
CCTCGCGGCCCTGCAGCC----- morL 1
-CTCGCGGCCCTGCAGCCTC----- morL 1
-----TCAGGCTCAGTCCCCTCCCGAT----- mirL 2
-----TCAGGCTCAGTCCCCTCCCGATA----- mirL 2

```



```
-----TCAGGCTCAGTCCCCTCCCGA----- mirL 2
-----TCAGGCTCAGTCCCCTCC----- mirL 1
-----TCAGGCTCAGTCCCCTCCCGATAA----- mirL 2
-----TCAGGCTCAGTCCCCTCCC----- mirL 1
-----TCAGGCTCAGTCCCCTCCCG----- mirL 2
-----CAGGCTCAGTCCCCTCCCGAT----- mirL 2
-----CAGGCTCAGTCCCCTCCCGATA----- mirL 2
-----CAGGCTCAGTCCCCTCCCGA----- mirL 2
-----CAGGCTCAGTCCCCTCCCGATAA----- mirL 2
-----CAGGCTCAGTCCCCTCCCG----- mirL 1
-----CAGGCTCAGTCCCCTCCC----- mirL 1
-----GTCAGGCTCAGTCCCCTCCCGAT----- mirL 2
-----AGGCTCAGTCCCCTCCCGAT----- mirL 2
-----CAGGCTCAGTCCCCTCCCGATAAA----- mirL 2
-----GGCTCAGTCCCCTCCCGAT----- mirL 1
-----AGGCTCAGTCCCCTCCCGATAA----- mirL 2
-----GTCAGGCTCAGTCCCCTCCCGA----- mirL 2
-----AGGCTCAGTCCCCTCCCGATA----- mirL 2
-----TCGTCAGGCTCAGTCCCCTCCCGAT----- mirL 2
-----AGGCTCAGTCCCCTCCCGA----- mirL 1
-----GGCTCAGTCCCCTCCCGATA----- mirL 2
-----CGTCAGGCTCAGTCCCCTCCCGA----- mirL 2
-----CGTCAGGCTCAGTCCCCTCC----- mirL 2
-----GGCTCAGTCCCCTCCCGA----- mirL 1
-----GTCAGGCTCAGTCCCCTCC----- mirL 1
-----GGCTCAGTCCCCTCCCGATAA----- mirL 2
-----GTCAGGCTCAGTCCCCTCCCGATA----- mirL 2
-----CGTCAGGCTCAGTCCCCTC----- mirL 1
-----TCGTCAGGCTCAGTCCCCTCC----- mirL 2
-----GTCAGGCTCAGTCCCCTCCC----- mirL 2
-----GTCAGGCTCAGTCCCCTCCCG----- mirL 2
-----TCGTCAGGCTCAGTCCCC----- mirL 1
-----CGTCAGGCTCAGTCCCCTCCC----- mirL 2
-----TCGTCAGGCTCAGTCCCCTCCCG----- mirL 2
-----GTCAGGCTCAGTCCCCTCCCGATAA----- mirL 2
-----TCGTCAGGCTCAGTCCCCT----- mirL 1
-----CGTCAGGCTCAGTCCCCTCCCGAT----- mirL 2
-----TTCTCACTACTGGTTTGA----- mirR 1
-----TTCTCACTACTGGTTTGATG----- mirR 2
-----GTTCTCACTACTGGTTTGA----- mirR 1
-----TTCTCACTACTGGTTTGAT----- mirR 1
-----TCTCACTACTGGTTTGAT----- mirR 1
-----TCTCACTACTGGTTTGATG----- mirR 1
-----GTTCTCACTACTGGTTTG----- mirR 1
```

>mmu-mir-3102

|                                                                                                                            | species | len | read  |
|----------------------------------------------------------------------------------------------------------------------------|---------|-----|-------|
| GTGAGTGGCCAGGGTGGGGCTGGGTGGTGCAGGCAGGAGAGCCATTGATCTATTGTGGGCTCTACTCCCTGCCCCAGCCAGAGCACCCCATTGGCTACCCACAGGTACACAGCAGCCAGCGT | morL    | 23  | 5     |
| GTGAGTGGCCAGGGTGGGGCTGG                                                                                                    | morL    | 21  | 3     |
| GTGAGTGGCCAGGGTGGGGCT                                                                                                      | morL    | 18  | 2     |
| --GAGTGGCCAGGGTGGGGC                                                                                                       | morL    | 24  | 2     |
| GTGAGTGGCCAGGGTGGGGCTGGG                                                                                                   | morL    | 20  | 1     |
| GTGAGTGGCCAGGGTGGGGC                                                                                                       | mirL    | 20  | 703   |
| GGTGGTGCAGGCAGGAGAGC                                                                                                       | mirL    | 21  | 444   |
| GGTGGTGCAGGCAGGAGAGCCAT                                                                                                    | mirL    | 23  | 246   |
| GGTGGTGCAGGCAGGAGAGCCA                                                                                                     | mirL    | 22  | 223   |
| GGTGGTGCAGGCAGGAGAG                                                                                                        | mirL    | 19  | 168   |
| GGTGGTGCAGGCAGGAGAGCCATT                                                                                                   | mirL    | 24  | 104   |
| GGTGGTGCAGGCAGGAGA                                                                                                         | mirL    | 18  | 80    |
| GTGGTGCAGGCAGGAGAGCCAT                                                                                                     | mirL    | 22  | 12    |
| GTGGTGCAGGCAGGAGAGC                                                                                                        | mirL    | 19  | 9     |
| GTGGTGCAGGCAGGAGAGCCA                                                                                                      | mirL    | 21  | 4     |
| GTGGTGCAGGCAGGAGAGCC                                                                                                       | mirL    | 20  | 3     |
| TGGTGCAGGCAGGAGAGC                                                                                                         | mirL    | 18  | 2     |
| GGGTGGTGCAGGCAGGAGAGCCAT                                                                                                   | mirL    | 24  | 2     |
| GTGGTGCAGGCAGGAGAGCCATT                                                                                                    | mirL    | 23  | 1     |
| GTGGTGCAGGCAGGAGAG                                                                                                         | mirL    | 18  | 1     |
| GTGGTGCAGGCAGGAGAGCCATTGA                                                                                                  | mirL    | 25  | 1     |
| GGGTGGTGCAGGCAGGAGAGCC                                                                                                     | mirL    | 22  | 1     |
| GGTGCAGGCAGGAGAGCC                                                                                                         | mirL    | 18  | 1     |
| GGTGCAGGCAGGAGAGCCA                                                                                                        | mirL    | 19  | 1     |
| GAGCACCCCATTGGCTACCCAC                                                                                                     | mirR    | 22  | 45235 |
| GAGCACCCCATTGGCTACCCACA                                                                                                    | mirR    | 23  | 27797 |
| GAGCACCCCATTGGCTACCCACAG                                                                                                   | mirR    | 24  | 16364 |
| GAGCACCCCATTGGCTACCCA                                                                                                      | mirR    | 21  | 7216  |
| GAGCACCCCATTGGCTACCCACAGG                                                                                                  | mirR    | 25  | 6805  |
| GAGCACCCCATTGGCTACCC                                                                                                       | mirR    | 20  | 5945  |
| GAGCACCCCATTGGCTACC                                                                                                        | mirR    | 19  | 3043  |
| AGAGCACCCCATTGGCTACCCAC                                                                                                    | mirR    | 23  | 414   |
| AGAGCACCCCATTGGCTACCCACA                                                                                                   | mirR    | 24  | 242   |
| CACCCCATTGGCTACCCACAGG                                                                                                     | mirR    | 22  | 221   |
| AGAGCACCCCATTGGCTACCC                                                                                                      | mirR    | 21  | 144   |
| CACCCCATTGGCTACCCACAG                                                                                                      | mirR    | 21  | 100   |
| CACCCCATTGGCTACCCACA                                                                                                       | mirR    | 20  | 85    |
| AGAGCACCCCATTGGCTACCCA                                                                                                     | mirR    | 22  | 83    |
| CACCCCATTGGCTACCCAC                                                                                                        | mirR    | 19  | 77    |
| AGAGCACCCCATTGGCTACCCACAG                                                                                                  | mirR    | 25  | 77    |
| CACCCCATTGGCTACCCACAGGT                                                                                                    | mirR    | 23  | 49    |
| AGCACCCCATTGGCTACCCACA                                                                                                     | mirR    | 22  | 49    |
| AGAGCACCCCATTGGCTACC                                                                                                       | mirR    | 20  | 31    |
| AGCACCCCATTGGCTACCCAC                                                                                                      | mirR    | 21  | 27    |
| CACCCCATTGGCTACCCACAGGTA                                                                                                   | mirR    | 24  | 22    |

```

-----CAGAGCACCCCATTGGCTACCCAC----- mirR 24 21
-----AGCACCCCATTGGCTACCCACAG----- mirR 23 19
-----AGAGCACCCCATTGGCTAC----- mirR 19 18
-----GCACCCCATTGGCTACCCAC----- mirR 20 12
-----GCACCCCATTGGCTACCCACA----- mirR 21 12
-----CAGAGCACCCCATTGGCTACCCACA----- mirR 25 11
-----CACCCCATTGGCTACCCA----- mirR 18 11
-----CAGAGCACCCCATTGGCTACCC----- mirR 22 7
-----AGCACCCCATTGGCTACCCACAGG----- mirR 24 7
-----CAGAGCACCCCATTGGCTACCCA----- mirR 23 5
-----CAGAGCACCCCATTGGCTACCCACAGG----- mirR 27 4
-----GCACCCCATTGGCTACCCACAG----- mirR 22 4
-----GCACCCCATTGGCTACCCA----- mirR 19 3
-----AGCACCCCATTGGCTACCCA----- mirR 20 3
-----GCACCCCATTGGCTACCCACAGG----- mirR 23 3
-----AGCACCCCATTGGCTACCC----- mirR 19 2
-----GCACCCCATTGGCTACCC----- mirR 18 2
-----CAGAGCACCCCATTGGCTAC----- mirR 20 1
-----CAGAGCACCCCATTGGCTACC----- mirR 21 1
-----GCACCCCATTGGCTACCCACAGGT----- mirR 24 1
-----AGCACCCCATTGGCTACCCACAGGT----- mirR 25 1
-----AGGTACACAGCAGCCAGCG----- morR 19 2
-----GGTACACAGCAGCCAGCG----- morR 18 1
-----CACAGGTACACAGCAGCCAG----- morR 20 1
-----GGTACACAGCAGCCAGCGT----- morR 19 1

```

>mmu-mir-331

```

TCTGGTTTTGTTTGGGTTTGTCTAGGTATGGTCCCAGGGATCCCAGATCAAACCAGGCCCTGGCCTATCCTAGAACCAA species len reads
---GTTTTGTTTGGGTTTGT----- morL 18 11
---GGTTTTGTTTGGGTTTGT----- morL 19 9
--TGGTTTTGTTTGGGTTTGT----- morL 18 2
--TGGTTTTGTTTGGGTTTGT----- morL 20 2
-CIGGTTTTGTTTGGGTTT----- morL 18 2
---GTTTTGTTTGGGTTTGTTC----- morL 19 2
---GGTTTTGTTTGGGTTTGTTC----- morL 20 1
---TTTTGTTTGGGTTTGTTC----- morL 18 1
---GGTTTTGTTTGGGTTTGT----- morL 18 1
TCTGGTTTTGTTTGGGTTT----- morL 19 1
--TGGTTTTGTTTGGGTTTGT----- morL 19 1
-----CTAGGTATGGTCCCAGGGATCC----- mirL 22 344
-----TCTAGGTATGGTCCCAGGGAT----- mirL 21 139
-----CTAGGTATGGTCCCAGGGAT----- mirL 20 123
-----CTAGGTATGGTCCCAGGGATCCC----- mirL 23 102
-----CTAGGTATGGTCCCAGGGATCC----- mirL 21 84
-----GGTATGGTCCCAGGGATCC----- mirL 19 51
-----TCTAGGTATGGTCCCAGGGATCC----- mirL 23 48

```

```

-----CTAGGTATGGTCCCAGGGA----- mirL 19 36
-----TCTAGGTATGGTCCCAGGGATC----- mirL 22 34
-----TCTAGGTATGGTCCCAGGGA----- mirL 20 23
-----AGGTATGGTCCCAGGGATCC----- mirL 20 20
-----GGTATGGTCCCAGGGATCCC----- mirL 20 20
-----CTAGGTATGGTCCCAGGG----- mirL 18 13
-----GGTATGGTCCCAGGGATC----- mirL 18 11
-----CTAGGTATGGTCCCAGGGATCCCA----- mirL 24 10
-----TAGGTATGGTCCCAGGGATCCC----- mirL 22 7
-----AGGTATGGTCCCAGGGATCCC----- mirL 21 6
-----TAGGTATGGTCCCAGGGATCC----- mirL 21 6
-----TTCTAGGTATGGTCCCAGGGAT----- mirL 22 5
-----TAGGTATGGTCCCAGGGA----- mirL 18 3
-----AGGTATGGTCCCAGGGATC----- mirL 19 3
-----TCTAGGTATGGTCCCAGGGATCCCA----- mirL 25 2
-----TCTAGGTATGGTCCCAGG----- mirL 18 1
-----TCTAGGTATGGTCCCAGGGATCCC----- mirL 24 1
-----TTCTAGGTATGGTCCCAGGGATC----- mirL 23 1
-----AGGTATGGTCCCAGGGAT----- mirL 18 1
-----AGGTATGGTCCCAGGGATCCCA----- mirL 22 1
-----TTCTAGGTATGGTCCCAGGG----- mirL 20 1
-----TCCCAGATCAAACCAGGC----- loop 18 1
-----GCCCTGGGCCTATCCTAGA----- mirR 20 38393
-----GCCCTGGGCCTATCCTAGAA----- mirR 21 27932
-----GCCCTGGGCCTATCCTAGAAC----- mirR 22 19742
-----GCCCTGGGCCTATCCTAGAACC----- mirR 23 9277
-----CCCCTGGGCCTATCCTAGAAC----- mirR 21 3477
-----GCCCTGGGCCTATCCTAG----- mirR 19 3305
-----CCCCTGGGCCTATCCTAGAACC----- mirR 22 3288
-----GCCCTGGGCCTATCCTA----- mirR 18 1964
-----CCCCTGGGCCTATCCTAGAA----- mirR 20 1777
-----CCCTGGGCCTATCCTAGA----- mirR 19 1612
-----GCCCTGGGCCTATCCTAGAACCA----- mirR 24 605
-----CCCTGGGCCTATCCTAGAACCA----- mirR 23 490
-----CCCTGGGCCTATCCTAG----- mirR 18 276
-----CCCTGGGCCTATCCTAGAACCAA----- mirR 24 60
-----CCCTGGGCCTATCCTAGAA----- mirR 19 29
-----GGCCCTGGGCCTATCCTAGA----- mirR 21 24
-----CCCTGGGCCTATCCTAGA----- mirR 18 18
-----GGCCCTGGGCCTATCCTAGAAC----- mirR 23 14
-----CCTGGGCCTATCCTAGAA----- mirR 18 12
-----CCCTGGGCCTATCCTAGAAC----- mirR 20 10
-----GGCCCTGGGCCTATCCTAGAA----- mirR 22 8
-----AGGCCCTGGGCCTATCCTAGA----- mirR 22 3
-----CCCTGGGCCTATCCTAGAACCA----- mirR 22 3
-----CCTGGGCCTATCCTAGAAC----- mirR 19 3

```

```

-----CCCTGGGCCTATCCTAGAACC-- mirR 21 2
-----GGCCCCTGGGCCTATCCTAGAACC-- mirR 24 2
-----GGCCCCTGGGCCTATCCTAG----- mirR 20 2
-----AGGCCCTGGGCCTATCCTAGAAC-- mirR 24 2

```

>mmu-mir-34c

| CTTTTTTCTGAGTCTAGTTACTAGGCAGTGTAGTTAGCTGATTGCTAATAGTACCAATCACTAACCACACAGCCAGGTAAAAAGACTGAAATTCCTCCG | species | len | reads |
|-----------------------------------------------------------------------------------------------------|---------|-----|-------|
| --TTTTTCTGAGTCTAGTTA-----                                                                           | morL    | 18  | 1     |
| CTTTTTTCTGAGTCTAGTTA-----                                                                           | morL    | 20  | 1     |
| -----AGGCAGTGTAGTTAGCTGATTGC-----                                                                   | mirL    | 23  | 77844 |
| -----AGGCAGTGTAGTTAGCTGATTG-----                                                                    | mirL    | 22  | 9470  |
| -----AGGCAGTGTAGTTAGCTGATT-----                                                                     | mirL    | 21  | 5222  |
| -----AGGCAGTGTAGTTAGCTGAT-----                                                                      | mirL    | 20  | 3539  |
| -----AGGCAGTGTAGTTAGCTGA-----                                                                       | mirL    | 19  | 2151  |
| -----AGGCAGTGTAGTTAGCTGATTGCT-----                                                                  | mirL    | 24  | 1692  |
| -----AGGCAGTGTAGTTAGCTG-----                                                                        | mirL    | 18  | 590   |
| -----TAGGCAGTGTAGTTAGCTGATTGC-----                                                                  | mirL    | 24  | 193   |
| -----TAGGCAGTGTAGTTAGCTGATTG-----                                                                   | mirL    | 23  | 101   |
| -----TAGGCAGTGTAGTTAGCTGATT-----                                                                    | mirL    | 22  | 77    |
| -----GGCAGTGTAGTTAGCTGATTGC-----                                                                    | mirL    | 22  | 69    |
| -----GCAGTGTAGTTAGCTGATTG-----                                                                      | mirL    | 20  | 43    |
| -----GCAGTGTAGTTAGCTGATTGC-----                                                                     | mirL    | 21  | 35    |
| -----TAGGCAGTGTAGTTAGCTGAT-----                                                                     | mirL    | 21  | 34    |
| -----GGCAGTGTAGTTAGCTGATTG-----                                                                     | mirL    | 21  | 24    |
| -----TAGGCAGTGTAGTTAGCTGA-----                                                                      | mirL    | 20  | 12    |
| -----CAGTGTAGTTAGCTGATTG-----                                                                       | mirL    | 19  | 11    |
| -----CTAGGCAGTGTAGTTAGCTGATTGC-----                                                                 | mirL    | 25  | 11    |
| -----CAGTGTAGTTAGCTGATTGC-----                                                                      | mirL    | 20  | 10    |
| -----TAGGCAGTGTAGTTAGCT-----                                                                        | mirL    | 18  | 9     |
| -----TAGGCAGTGTAGTTAGCTGATTGCT-----                                                                 | mirL    | 25  | 6     |
| -----GCAGTGTAGTTAGCTGATT-----                                                                       | mirL    | 19  | 5     |
| -----GGCAGTGTAGTTAGCTGATT-----                                                                      | mirL    | 20  | 4     |
| -----GGCAGTGTAGTTAGCTGATTGCT-----                                                                   | mirL    | 23  | 4     |
| -----CAGTGTAGTTAGCTGATT-----                                                                        | mirL    | 18  | 4     |
| -----GGCAGTGTAGTTAGCTGAT-----                                                                       | mirL    | 19  | 3     |
| -----GGCAGTGTAGTTAGCTGA-----                                                                        | mirL    | 18  | 3     |
| -----CTAGGCAGTGTAGTTAGCTGAT-----                                                                    | mirL    | 22  | 3     |
| -----CTAGGCAGTGTAGTTAGCTGATTG-----                                                                  | mirL    | 24  | 2     |
| -----GCAGTGTAGTTAGCTGAT-----                                                                        | mirL    | 18  | 1     |
| -----ACTAGGCAGTGTAGTTAGCTGATTG-----                                                                 | mirL    | 25  | 1     |
| -----ACTAGGCAGTGTAGTTAGCTGAT-----                                                                   | mirL    | 23  | 1     |
| -----GCAGTGTAGTTAGCTGATTGCT-----                                                                    | mirL    | 22  | 1     |
| -----AATCACTAACCACACAGCCAGG-----                                                                    | mirR    | 22  | 3037  |
| -----AATCACTAACCACACAGCCAG-----                                                                     | mirR    | 21  | 2824  |
| -----AATCACTAACCACACAGCCA-----                                                                      | mirR    | 20  | 1295  |
| -----AATCACTAACCACACAGCCAGGT-----                                                                   | mirR    | 23  | 1242  |

```

-----AATCTACTAACCACACAGCC----- mirR 19 930
-----AATCTACTAACCACACAGC----- mirR 18 483
-----AATCTACTAACCACACAGCCAGGTA----- mirR 24 413
-----ATCTACTAACCACACAGCCAGG----- mirR 21 138
-----ATCTACTAACCACACAGCCAG----- mirR 20 120
-----ATCTACTAACCACACAGCCAGGT----- mirR 22 98
-----ATCTACTAACCACACAGCCA----- mirR 19 64
-----ATCTACTAACCACACAGCCAGGTA----- mirR 23 33
-----ATCTACTAACCACACAGCC----- mirR 18 30
-----CACTAACCACACAGCCAG----- mirR 18 29
-----TCTACTAACCACACAGCCAG----- mirR 19 27
-----CACTAACCACACAGCCAGG----- mirR 19 27
-----TCTACTAACCACACAGCCA----- mirR 18 13
-----ATCTACTAACCACACAGCCAGGTAA----- mirR 24 13
-----TCTACTAACCACACAGCCAGGT----- mirR 21 10
-----CACTAACCACACAGCCAGGT----- mirR 20 9
-----TCTACTAACCACACAGCCAGG----- mirR 20 6
-----TCTACTAACCACACAGCCAGGTA----- mirR 22 6
-----TCTACTAACCACACAGCCAGGTAA----- mirR 23 2
-----ACCAATCTACTAACCACACAGCC----- mirR 22 1
-----CAATCTACTAACCACACAGCCAGGT----- mirR 24 1
-----CAATCTACTAACCACACAGCCA----- mirR 21 1
-----CAATCTACTAACCACACAG----- mirR 18 1
-----TAAAAAGACTGAAATTC----- morR 18 2
-----AAAGACTGAAATTCCTCCG morR 19 1
-----GTAAAAAGACTGAAATTCCT--- morR 20 1
-----AAAAAGACTGAAATTCCTCCG morR 21 1
-----AGGTAAAAAGACTGAAATT----- morR 19 1

```

>mmu-mir-511b

```

ATGTGCTCTTGTGGCCCATGAAATCAAGCTTGGGTGAGACCTGGTGCAGAACAGGAAGGCGACCCATACTTGGTTTCAGTGGCTGCAAGAATGACTGCATGGTCGACAGGA species len reads
ATGTGCTCTTGTGGCCCAT----- morL 19 2
----GCTCTTGTGGCCCATGAA----- morL 18 1
ATGTGCTCTTGTGGCCCATG----- morL 20 1
---TGCTCTTGTGGCCCATGA----- morL 18 1
-----GAAATCAAGCTTGGGTGAGACC----- mirL 22 284
-----GAAATCAAGCTTGGGTGAGAC----- mirL 21 150
-----GAAATCAAGCTTGGGTGAGACCT----- mirL 23 129
-----GAAATCAAGCTTGGGTGAG----- mirL 19 78
-----GAAATCAAGCTTGGGTGA----- mirL 18 68
-----GAAATCAAGCTTGGGTGAGA----- mirL 20 67
-----GAAATCAAGCTTGGGTGAGACCTG----- mirL 24 35
-----AATCAAGCTTGGGTGAGAC----- mirL 19 6
-----AAATCAAGCTTGGGTGAGAC----- mirL 20 6
-----ATCAAGCTTGGGTGAGAC----- mirL 18 4
-----AATCAAGCTTGGGTGAGAC----- mirL 20 4

```

```

-----AAATCAAGCTTGGGTGAG----- mirL 18 2
-----AATCAAGCTTGGGTGAGA----- mirL 18 2
-----AATCAAGCTTGGGTGAGACCT----- mirL 21 1
-----AAATCAAGCTTGGGTGAGA----- mirL 19 1
-----AAATCAAGCTTGGGTGAGACCT----- mirL 22 1
-----TGAAATCAAGCTTGGGTG----- mirL 18 1
-----GGTGCAGAACAGGAAGGC----- loop 18 3
-----ACCTGGTGCAGAACAGGAA----- loop 19 1
-----CCTGGTGCAGAACAGGAAGGC----- loop 21 1
-----GCGACCCATACTTGGTTTCAG----- mirR 21 30056
-----GCGACCCATACTTGGTTTCAGT----- mirR 22 24187
-----GCGACCCATACTTGGTTTCA----- mirR 20 14031
-----GCGACCCATACTTGGTTTC----- mirR 19 12793
-----GCGACCCATACTTGGTTTCAGTG----- mirR 23 11299
-----GCGACCCATACTTGGTTTCAGTGG----- mirR 24 4875
-----CGACCCATACTTGGTTTCAGTG----- mirR 22 4332
-----GGCGACCCATACTTGGTTTCAG----- mirR 22 1667
-----GCGACCCATACTTGGTTT----- mirR 18 1565
-----CGACCCATACTTGGTTTCAGTGG----- mirR 23 760
-----GGCGACCCATACTTGGTTTCA----- mirR 21 482
-----CGACCCATACTTGGTTTCAGT----- mirR 21 387
-----CGACCCATACTTGGTTTCAG----- mirR 20 364
-----GGCGACCCATACTTGGTTTCAGT----- mirR 23 240
-----CGACCCATACTTGGTTTCAGTGGC----- mirR 24 183
-----CGACCCATACTTGGTTTC----- mirR 18 167
-----CGACCCATACTTGGTTTCA----- mirR 19 166
-----GGCGACCCATACTTGGTTTCAGTG----- mirR 24 79
-----GGCGACCCATACTTGGTTTCAGTGG----- mirR 25 51
-----GGCGACCCATACTTGGTTTC----- mirR 20 50
-----GACCCATACTTGGTTTCAGTG----- mirR 21 40
-----GGCGACCCATACTTGGTTTCAGTGGCT----- mirR 27 27
-----GACCCATACTTGGTTTCAG----- mirR 19 24
-----GACCCATACTTGGTTTCAGT----- mirR 20 19
-----ACCCATACTTGGTTTCAGTG----- mirR 20 17
-----GACCCATACTTGGTTTCA----- mirR 18 14
-----ACCCATACTTGGTTTCAGT----- mirR 19 10
-----ACCCATACTTGGTTTCAG----- mirR 18 10
-----GACCCATACTTGGTTTCAGTGG----- mirR 22 6
-----AGGCGACCCATACTTGGTTTCA----- mirR 22 6
-----ACCCATACTTGGTTTCAGTGG----- mirR 21 5
-----GACCCATACTTGGTTTCAGTGGC----- mirR 23 5
-----AGGCGACCCATACTTGGTTTCAG----- mirR 23 3
-----AGGCGACCCATACTTGGT----- mirR 18 3
-----GACCCATACTTGGTTTCAGTGGCTG----- mirR 25 2
-----AGGCGACCCATACTTGGTTTCAGT----- mirR 24 2
-----ACCCATACTTGGTTTCAGTGGC----- mirR 22 2

```

```
-----AAGGCGACCCATACTTGGTTTCA----- mirR 23 1
-----AAGGCGACCCATACTTGGTTTC----- mirR 22 1
-----TGGCTGCAAGAATGACTGCATGGTTCGACAGGA morR 32 1
```

>mmu-mir-541

| Species | len | reads |
|---------|-----|-------|
| morL    | 18  | 1     |
| mirL    | 24  | 39297 |
| mirL    | 22  | 22778 |
| mirL    | 25  | 16904 |
| mirL    | 26  | 10511 |
| mirL    | 20  | 5396  |
| mirL    | 23  | 4659  |
| mirL    | 21  | 4552  |
| mirL    | 23  | 118   |
| mirL    | 22  | 76    |
| mirL    | 23  | 73    |
| mirL    | 24  | 71    |
| mirL    | 22  | 64    |
| mirL    | 21  | 54    |
| mirL    | 21  | 34    |
| mirL    | 22  | 32    |
| mirL    | 24  | 29    |
| mirL    | 25  | 28    |
| mirL    | 20  | 27    |
| mirL    | 21  | 20    |
| mirL    | 20  | 20    |
| mirL    | 23  | 19    |
| mirL    | 19  | 17    |
| mirL    | 20  | 14    |
| mirL    | 23  | 13    |
| mirL    | 18  | 6     |
| mirL    | 19  | 6     |
| mirL    | 26  | 5     |
| mirL    | 25  | 5     |
| mirL    | 25  | 3     |
| mirL    | 24  | 2     |
| mirL    | 27  | 2     |
| mirL    | 23  | 1     |
| mirL    | 20  | 1     |
| mirL    | 27  | 1     |
| mirL    | 28  | 1     |
| mirL    | 25  | 1     |
| mirL    | 21  | 1     |
| mirL    | 28  | 1     |
| loop    | 18  | 1     |



```

-----ACTCCAAGAGTTTTAAAA----- loop 18 1
-----AGTGGCGAACACAGAATCCAT----- mirR 21 519
-----AGTGGCGAACACAGAATCCATAC--- mirR 23 479
-----TGGCGAACACAGAATCCATACT-- mirR 22 375
-----TGGCGAACACAGAATCCATAC--- mirR 21 286
-----TGGCGAACACAGAATCCATACTC- mirR 23 234
-----AGTGGCGAACACAGAATCCA----- mirR 20 124
-----AGTGGCGAACACAGAATCCATA--- mirR 22 92
-----AGTGGCGAACACAGAATCC----- mirR 19 75
-----AGTGGCGAACACAGAATCCATACT-- mirR 24 64
-----TGGCGAACACAGAATCCATA--- mirR 20 58
-----TGGCGAACACAGAATCCAT----- mirR 19 46
-----GTGGCGAACACAGAATCCATAC--- mirR 22 42
-----AGTGGCGAACACAGAATCCATACTC- mirR 25 25
-----TGGCGAACACAGAATCCA----- mirR 18 22
-----GTGGCGAACACAGAATCCAT----- mirR 20 13
-----GGCGAACACAGAATCCATACT-- mirR 21 10
-----GTGGCGAACACAGAATCCATA--- mirR 21 7
-----GGCGAACACAGAATCCATAC--- mirR 20 5
-----GTGGCGAACACAGAATCCA----- mirR 19 3
-----ATGAGTGGCGAACACAGAATCC----- mirR 22 3
-----GTGGCGAACACAGAATCC----- mirR 18 2
-----ATGAGTGGCGAACACAGAATCCAT---- mirR 24 2
-----GTGGCGAACACAGAATCCATACTC- mirR 24 2
-----GAGTGGCGAACACAGAATCCAT---- mirR 22 1
-----ATGAGTGGCGAACACAGAA----- mirR 19 1
-----GAGTGGCGAACACAGAATC----- mirR 19 1
-----TGAGTGGCGAACACAGAATCC----- mirR 21 1
-----GGCGAACACAGAATCCAT----- mirR 18 1
-----GGCGAACACAGAATCCATACTC- mirR 22 1
-----TGGCGAACACAGAATCCATACTCT mirR 24 1

```

>mmu-mir-130a

| Species                                                                                               | len | reads |
|-------------------------------------------------------------------------------------------------------|-----|-------|
| ATGCCTTTGCTGCTGGCCGAGCTCTTTTCACATTGTGCTACTGTCTAACGTGTACCGAGCAGTGCATGTTAAAAGGGCATCGGCCCTTGAGTACTACCCAG | 18  | 3     |
| -TGCCTTTGCTGCTGGCCG-----                                                                              | 18  | 2     |
| ATGCCTTTGCTGCTGGCC-----                                                                               | 18  | 2     |
| -----GCTCTTTTCACATTGTGCTACT-----                                                                      | 22  | 941   |
| -----GCTCTTTTCACATTGTGCTAC-----                                                                       | 21  | 283   |
| -----GCTCTTTTCACATTGTGCTACTG-----                                                                     | 23  | 85    |
| -----GCTCTTTTCACATTGTGCTA-----                                                                        | 20  | 45    |
| -----GCTCTTTTCACATTGTGC-----                                                                          | 18  | 32    |
| -----AGCTCTTTTCACATTGTGCTAC-----                                                                      | 22  | 16    |
| -----GCTCTTTTCACATTGTGCT-----                                                                         | 19  | 14    |
| -----AGCTCTTTTCACATTGTGCTACT-----                                                                     | 23  | 12    |
| -----AGCTCTTTTCACATTGTGCT-----                                                                        | 20  | 8     |
| -----GCTCTTTTCACATTGTGCTACTGT-----                                                                    | 24  | 3     |

```

-----AGCTCTTTTCACATTGTGC----- mirL 19 2
-----GAGCTCTTTTCACATTGTG----- mirL 19 1
-----AGCTCTTTTCACATTGTGCTACTG----- mirL 24 1
-----AGCTCTTTTCACATTGTG----- mirL 18 1
-----TCTTTTCACATTGTGCTA----- mirL 18 1
-----AGCTCTTTTCACATTGTGCTA----- mirL 21 1
-----CAGTGCAATGTTAAAAGGGCAT----- mirR 22 54045
-----CAGTGCAATGTTAAAAGGGCATC----- mirR 23 31066
-----CAGTGCAATGTTAAAAGGGCA----- mirR 21 7826
-----CAGTGCAATGTTAAAAGGGC----- mirR 20 7287
-----CAGTGCAATGTTAAAAGGGCATCG----- mirR 24 2747
-----CAGTGCAATGTTAAAAGGG----- mirR 19 1252
-----CAGTGCAATGTTAAAAGG----- mirR 18 432
-----AGTGCAATGTTAAAAGGGCAT----- mirR 21 317
-----GTGCAATGTTAAAAGGGCAT----- mirR 20 113
-----TGCAATGTTAAAAGGGCAT----- mirR 19 71
-----AGTGCAATGTTAAAAGGGCATC----- mirR 22 64
-----AGTGCAATGTTAAAAGGGC----- mirR 19 57
-----AGTGCAATGTTAAAAGGGCA----- mirR 20 56
-----GCAGTGCAATGTTAAAAGGGCAT----- mirR 23 55
-----GCAGTGCAATGTTAAAAGGGCATC----- mirR 24 50
-----AGTGCAATGTTAAAAGGGCATCG----- mirR 23 44
-----AGTGCAATGTTAAAAGGGCATCGG----- mirR 24 26
-----GTGCAATGTTAAAAGGGCA----- mirR 19 24
-----GTGCAATGTTAAAAGGGC----- mirR 18 22
-----GCAGTGCAATGTTAAAAGGGC----- mirR 21 20
-----AGTGCAATGTTAAAAGGG----- mirR 18 16
-----GCAGTGCAATGTTAAAAGGGCA----- mirR 22 11
-----GTGCAATGTTAAAAGGGCATC----- mirR 21 9
-----GCAGTGCAATGTTAAAAGGG----- mirR 20 4
-----TGCAATGTTAAAAGGGCA----- mirR 18 4
-----TGCAATGTTAAAAGGGCATC----- mirR 20 3
-----GCAGTGCAATGTTAAAAGGGCATCG----- mirR 25 2
-----GCAGTGCAATGTTAAAAGG----- mirR 19 1
-----CCTTGTAGTACTACCCAG morR 18 1

```

>mmu-mir-181b-1

```

TTTACAAAGGTCACAATCAACATTCATTGCTGTCGGTGGGTTGAACTGTGTAGAAAAGCTCACTGAACAATGAATGCAACTGTGGCCCCGCTTTTTTG species len reads
TTTACAAAGGTCACAATC----- morL 18 1
--TACAAAGGTCACAATCAA----- morL 18 1
-----AACATTCATTGCTGTCGGTGGGTTG----- mirL 25 23266
-----AACATTCATTGCTGTCGGTGGGT----- mirL 23 22660
-----AACATTCATTGCTGTCGGTGGGTT----- mirL 24 21660
-----AACATTCATTGCTGTCGGTGGG----- mirL 22 10782
-----AACATTCATTGCTGTCGGTGGGTTGA----- mirL 26 9223
-----AACATTCATTGCTGTCGGTGG----- mirL 21 8723

```

```

-----AACATTCATTGCTGTCGGTG----- mirL 20 8236
-----ACATTCATTGCTGTCGGTGGGTT----- mirL 23 375
-----ACATTCATTGCTGTCGGTGGGT----- mirL 22 283
-----ACATTCATTGCTGTCGGTGGGTTG----- mirL 24 260
-----ACATTCATTGCTGTCGGTGG----- mirL 20 120
-----ACATTCATTGCTGTCGGTGGTTGA----- mirL 25 119
-----ACATTCATTGCTGTCGGTGGG----- mirL 21 89
-----ACATTCATTGCTGTCGGTG----- mirL 19 64
-----CATTGCTGTCGGTGGGTT----- mirL 22 35
-----CATTGCTGTCGGTGGGT----- mirL 21 32
-----ATTGCTGTCGGTGGGT----- mirL 20 25
-----ATTGCTGTCGGTGGGTT----- mirL 21 22
-----ATTGCTGTCGGTGGGTTG----- mirL 22 13
-----CAACATTCATTGCTGTCGGTGGGT----- mirL 24 13
-----CAACATTCATTGCTGTCGGTGGG----- mirL 23 10
-----CATTGCTGTCGGTGGGTTGA----- mirL 24 9
-----ATTGCTGTCGGTGGGTTGA----- mirL 23 9
-----CATTGCTGTCGGTGGGTTG----- mirL 23 8
-----CAACATTCATTGCTGTCGGTGGGTTG----- mirL 26 7
-----CATTGCTGTCGGTGG----- mirL 19 6
-----CAACATTCATTGCTGTCGGTGGGTT----- mirL 25 6
-----CAACATTCATTGCTGTCGG----- mirL 19 6
-----ATTGCTGTCGGTGGG----- mirL 19 6
-----CAACATTCATTGCTGTCGGTG----- mirL 21 5
-----CATTGCTGTCGGTGGG----- mirL 20 3
-----CAACATTCATTGCTGTCG----- mirL 18 3
-----CATTGCTGTCGGTGGGTTGAA----- mirL 25 3
-----ATTGCTGTCGGTGG----- mirL 18 2
-----ATTGCTGTCGGTGGGTTGAA----- mirL 24 1
-----TCAACATTCATTGCTGTCGGTGGGT----- mirL 25 1
-----TCAACATTCATTGCTGTCGGTGGG----- mirL 24 1
-----TTGAACTGTGTAGAAAAG----- loop 18 1
-----AACTGTGTAGAAAAGCTC----- loop 18 1
-----CTCACTGAACAATGAATGCAA----- mirR 21 439
-----CTCACTGAACAATGAATGCA----- mirR 20 206
-----CTCACTGAACAATGAATGC----- mirR 19 166
-----CTCACTGAACAATGAATGCAAC----- mirR 22 59
-----CTCACTGAACAATGAATG----- mirR 18 18
-----AGCTCACTGAACAATGAATGCAA----- mirR 23 7
-----CTCACTGAACAATGAATGCAACT----- mirR 23 7
-----AGCTCACTGAACAATGAATGCAAC----- mirR 24 4
-----CTCACTGAACAATGAATGCAACTG----- mirR 24 2
-----TCACTGAACAATGAATGCA----- mirR 19 2
-----AGCTCACTGAACAATGAATGC----- mirR 21 2
-----AAGCTCACTGAACAATGAATGCAAC----- mirR 25 1
-----TCACTGAACAATGAATGCAA----- mirR 20 1

```

```

-----TCACTGAACAATGAATGCAAC----- mirR 21 1
-----GCTCACTGAACAATGAATGCA----- mirR 21 1
-----AGCTCACTGAACAATGAA----- mirR 18 1
-----GCTCACTGAACAATGAATGCAAC----- mirR 23 1
-----AGCTCACTGAACAATGAATGCA----- mirR 22 1
-----AAGCTCACTGAACAATGA----- mirR 18 1
-----GCTCACTGAACAATGAATGC----- mirR 20 1
-----CACTGAACAATGAATGCAA----- mirR 19 1
-----TCACTGAACAATGAATGCAACT----- mirR 22 1
-----CTGTGGCCCCGCTTTTGT morR 18 2
-----ACTGTGGCCCCGCTTTTGT morR 19 2
-----ACTGTGGCCCCGCTTTTGT- morR 18 1

```

>mmu-mir-219-2

| GA                             | ACTC | AGGGGCTTCGCCACTGATTGTCCAAACGCAATTCTTGTACGAGTCTGCGGCCAACCGAGAATTGTGGCTGGACATCTGTGGTTGAGCTCCGGGCTCTACAGAGACGAGGTCCAC | species | len | reads |
|--------------------------------|------|--------------------------------------------------------------------------------------------------------------------|---------|-----|-------|
| -AACTCAGGGGCTTCGCCAC           |      |                                                                                                                    | morL    | 19  | 12    |
| --ACTCAGGGGCTTCGCCAC           |      |                                                                                                                    | morL    | 18  | 7     |
| GA                             | ACTC | AGGGGCTTCGCCAC                                                                                                     | morL    | 20  | 5     |
| --ACTCAGGGGCTTCGCCACT          |      |                                                                                                                    | morL    | 19  | 4     |
| -AACTCAGGGGCTTCGCCACT          |      |                                                                                                                    | morL    | 20  | 3     |
| -----TGATTGTCCAAACGCAATTCTTG   |      |                                                                                                                    | mirL    | 23  | 4163  |
| -----TGATTGTCCAAACGCAATTCT     |      |                                                                                                                    | mirL    | 21  | 3791  |
| -----TGATTGTCCAAACGCAATTCTT    |      |                                                                                                                    | mirL    | 22  | 1780  |
| -----TGATTGTCCAAACGCAATTC      |      |                                                                                                                    | mirL    | 20  | 1670  |
| -----TGATTGTCCAAACGCAATT       |      |                                                                                                                    | mirL    | 19  | 1496  |
| -----TGATTGTCCAAACGCAATTCTTGT  |      |                                                                                                                    | mirL    | 24  | 1233  |
| -----TGATTGTCCAAACGCAAT        |      |                                                                                                                    | mirL    | 18  | 645   |
| -----GATTGTCCAAACGCAATTCTTG    |      |                                                                                                                    | mirL    | 22  | 283   |
| -----GATTGTCCAAACGCAATTCT      |      |                                                                                                                    | mirL    | 20  | 217   |
| -----GATTGTCCAAACGCAATTCTT     |      |                                                                                                                    | mirL    | 21  | 142   |
| -----GATTGTCCAAACGCAATT        |      |                                                                                                                    | mirL    | 18  | 124   |
| -----GATTGTCCAAACGCAATTC       |      |                                                                                                                    | mirL    | 19  | 100   |
| -----GATTGTCCAAACGCAATTCTTGT   |      |                                                                                                                    | mirL    | 23  | 79    |
| -----GATTGTCCAAACGCAATTCTTGTA  |      |                                                                                                                    | mirL    | 24  | 12    |
| -----TTGTCCAAACGCAATTCT        |      |                                                                                                                    | mirL    | 18  | 10    |
| -----ATTGTCCAAACGCAATTCT       |      |                                                                                                                    | mirL    | 19  | 3     |
| -----CTGATTGTCCAAACGCAATTCTTG  |      |                                                                                                                    | mirL    | 24  | 2     |
| -----ATTGTCCAAACGCAATTC        |      |                                                                                                                    | mirL    | 18  | 1     |
| -----CTGATTGTCCAAACGCAATTCTTGT |      |                                                                                                                    | mirL    | 25  | 1     |
| -----ATTGTCCAAACGCAATTCTTG     |      |                                                                                                                    | mirL    | 21  | 1     |
| -----CACTGATTGTCCAAACGC        |      |                                                                                                                    | mirL    | 18  | 1     |
| -----ACTGATTGTCCAAACGCAAT      |      |                                                                                                                    | mirL    | 20  | 1     |
| -----TTGTCCAAACGCAATTCTT       |      |                                                                                                                    | mirL    | 19  | 1     |
| -----ATTGTCCAAACGCAATTCTTGT    |      |                                                                                                                    | mirL    | 22  | 1     |
| -----TACGAGTCTGCGGCCAACCGA     |      |                                                                                                                    | loop    | 21  | 213   |
| -----TACGAGTCTGCGGCCAAC        |      |                                                                                                                    | loop    | 18  | 42    |

C:\Documents and Settings\hong\Desktop\Hippocampus-total RNA.txt

```
-----TACGAGTCTGCGGCCAACCGAG----- loop 22 39
-----TACGAGTCTGCGGCCAACCG----- loop 20 35
-----TACGAGTCTGCGGCCAACCG----- loop 19 33
-----TACGAGTCTGCGGCCAACCGAGA----- loop 23 11
-----ACGAGTCTGCGGCCAACCGA----- loop 20 5
-----ACGAGTCTGCGGCCAACCGAGA----- loop 22 1
-----TGTACGAGTCTGCGGCCAAC----- loop 20 1
-----AGAATTGTGGCTGGACATCTGT----- mirR 22 61250
-----AGAATTGTGGCTGGACATCTG----- mirR 21 8829
-----AGAATTGTGGCTGGACATCT----- mirR 20 5998
-----AGAATTGTGGCTGGACATC----- mirR 19 5003
-----AGAATTGTGGCTGGACATCTGTG----- mirR 23 3273
-----AGAATTGTGGCTGGACATCTGTGG----- mirR 24 1107
-----AGAATTGTGGCTGGACAT----- mirR 18 689
-----GAGAATTGTGGCTGGACATCT----- mirR 21 516
-----GAGAATTGTGGCTGGACATCTGT----- mirR 23 300
-----GAATTGTGGCTGGACATCTGT----- mirR 21 266
-----GAGAATTGTGGCTGGACATCTG----- mirR 22 233
-----AATTGTGGCTGGACATCTGT----- mirR 20 116
-----ATTGTGGCTGGACATCTGT----- mirR 19 107
-----GAGAATTGTGGCTGGACATC----- mirR 20 93
-----GAATTGTGGCTGGACATCTG----- mirR 20 67
-----GAGAATTGTGGCTGGACAT----- mirR 19 35
-----AATTGTGGCTGGACATCTG----- mirR 19 35
-----GAATTGTGGCTGGACATCT----- mirR 19 31
-----GAATTGTGGCTGGACATCTGTG----- mirR 22 22
-----ATTGTGGCTGGACATCTG----- mirR 18 19
-----GAATTGTGGCTGGACATCTGTGG----- mirR 23 14
-----GAGAATTGTGGCTGGACA----- mirR 18 14
-----GAATTGTGGCTGGACATC----- mirR 18 14
-----GAGAATTGTGGCTGGACATCTGTG----- mirR 24 8
-----ATTGTGGCTGGACATCTGTGG----- mirR 21 8
-----AATTGTGGCTGGACATCT----- mirR 18 6
-----ATTGTGGCTGGACATCTGTG----- mirR 20 5
-----AATTGTGGCTGGACATCTGTGG----- mirR 22 4
-----AATTGTGGCTGGACATCTGTG----- mirR 21 4
-----CGAGAATTGTGGCTGGACATCTGTG----- mirR 25 2
-----CGAGAATTGTGGCTGGACATCT----- mirR 22 2
-----CGAGAATTGTGGCTGGACATC----- mirR 21 1
-----GTTTGAGCTCCGGGCTCTACAGAGA----- morR 25 1
-----GTTTGAGCTCCGGGCTCTACAGAGACGAGGTCCAC morR 35 1
```

>mmu-mir-181b-2

```
TCAACATTCATTGCTGTCTCGGTGGGTTTGAATGTCAACCAACTCACTGATCAATGAATGCAAAGTGCAGGCAAAAAACGCAA species len reads
--AACATTCATTGCTGTCTCGGTGGGT----- mirL 23 22660
--AACATTCATTGCTGTCTCGGTGGTT----- mirL 24 21660
```

```

--AACATTCATTGCTGTCGGTGGGTTT----- mirL 25 20275
--ACATTCATTGCTGTCGGTGGG----- mirL 22 10782
--AACATTCATTGCTGTCGGTGGGTTTG----- mirL 26 9958
--AACATTCATTGCTGTCGGTGG----- mirL 21 8723
--AACATTCATTGCTGTCGGTG----- mirL 20 8236
--ACATTCATTGCTGTCGGTGGGT----- mirL 23 375
--ACATTCATTGCTGTCGGTGGGT----- mirL 22 283
--ACATTCATTGCTGTCGGTGGGTT----- mirL 24 221
--ACATTCATTGCTGTCGGTGGGTTTG----- mirL 25 176
--ACATTCATTGCTGTCGGTGG----- mirL 20 120
--ACATTCATTGCTGTCGGTGGG----- mirL 21 89
--ACATTCATTGCTGTCGGTG----- mirL 19 64
----CATTCAATTGCTGTCGGTGGGTT----- mirL 22 35
----CATTCAATTGCTGTCGGTGGGT----- mirL 21 32
----ATTCAATTGCTGTCGGTGGGT----- mirL 20 25
----ATTCAATTGCTGTCGGTGGGTT----- mirL 21 22
-CAACATTCATTGCTGTCGGTGGGT----- mirL 24 13
----ATTCAATTGCTGTCGGTGGGTT----- mirL 22 12
-CAACATTCATTGCTGTCGGTGGG----- mirL 23 10
----CATTCAATTGCTGTCGGTGGGTT----- mirL 23 8
----ATTCAATTGCTGTCGGTGGGTTTG----- mirL 23 7
----ATTCAATTGCTGTCGGTGGG----- mirL 19 6
----CATTCAATTGCTGTCGGTGG----- mirL 19 6
-CAACATTCATTGCTGTCGG----- mirL 19 6
-CAACATTCATTGCTGTCGGTGGGTT----- mirL 25 6
----CATTCAATTGCTGTCGGTGGGTTTG----- mirL 24 5
-CAACATTCATTGCTGTCGGTG----- mirL 21 5
-CAACATTCATTGCTGTCG----- mirL 18 3
-CAACATTCATTGCTGTCGGTGGGTT----- mirL 26 3
----CATTCAATTGCTGTCGGTGGG----- mirL 20 3
----ATTCAATTGCTGTCGGTGG----- mirL 18 2
----CATTCAATTGCTGTCGGTGGGTTTGA----- mirL 25 2
TCAACATTCATTGCTGTCGGTGGG----- mirL 24 1
----ATTCAATTGCTGTCGGTGGGTTTGAA----- mirL 25 1
TCAACATTCATTGCTGTCGGTGGGT----- mirL 25 1
-----CTCACTGATCAATGAATGCAA----- mirR 21 35
-----ACTCACTGATCAATGAATGCAA----- mirR 22 31
-----ACTCACTGATCAATGAATGCA----- mirR 21 17
-----CTCACTGATCAATGAATGC----- mirR 19 11
-----CTCACTGATCAATGAATGCA----- mirR 20 8
-----CTCACTGATCAATGAATGCAAA----- mirR 22 8
-----ACTCACTGATCAATGAATGC----- mirR 20 7
-----ACTCACTGATCAATGAATGCAAA----- mirR 23 6
-----CTCACTGATCAATGAATGCAAAC----- mirR 23 5
-----AACTCACTGATCAATGAATGC----- mirR 21 1
-----AACTCACTGATCAATGAATGCAA----- mirR 23 1

```

```

-----ACTCACTGATCAATGAATGCAAAC----- mirR 24 1
-----ACTCACTGATCAATGAAT----- mirR 18 1
-----CACTGATCAATGAATGCA----- mirR 18 1
-----CTGCGGGCCAAAAACGCA- morR 19 2
-----AACTGCGGGCCAAAAAC---- morR 18 1
-----ACTGCGGGCCAAAAACG-- morR 18 1
-----GCGGGCCAAAAACGCAA morR 18 1

```

>mmu-let-7i

```

CCGGCTCCACACCATGGCCCTGGCTGAGGTAGTAGTTTGTGCTGTTGGTCGGGTTGTGACATTGCCCGCTGTGGAGATAACTGCGCAAGCTACTGCCTTCTAGTGCTGGTGATGCTCAGCGCCGCGGAGGA species
---GCTCCCACACCATGGCCCTGGC----- morL 22
---CTCCCACACCATGGCCCTGGC----- morL 21
----CCACACCATGGCCCTGGCT----- morL 19
----CCCACACCATGGCCCTGGCT----- morL 20
----TCCCACACCATGGCCCTGG----- morL 19
----CCCACACCATGGCCCTGGC----- morL 19
----TCCCACACCATGGCCCTG----- morL 18
----CCACACCATGGCCCTGGC----- morL 18
----CCCACACCATGGCCCTGG----- morL 18
---GCTCCCACACCATGGCCCTGGCT----- morL 23
---TCCCACACCATGGCCCTGGC----- morL 20
CCGGCTCCACACCATGGCCCTGG----- morL 24
-----TGAGGTAGTAGTTTGTGCTGTT----- mirL 22
-----TGAGGTAGTAGTTTGTGCTGT----- mirL 21
-----TGAGGTAGTAGTTTGTGCTG----- mirL 20
-----TGAGGTAGTAGTTTGTGCTGTTG----- mirL 23
-----TGAGGTAGTAGTTTGTGCT----- mirL 18
-----TGAGGTAGTAGTTTGTGCT----- mirL 19
-----TGAGGTAGTAGTTTGTGCTGTTG----- mirL 24
-----GAGGTAGTAGTTTGTGCTGTT----- mirL 21
-----GAGGTAGTAGTTTGTGCTG----- mirL 19
-----GAGGTAGTAGTTTGTGCTGT----- mirL 20
-----GAGGTAGTAGTTTGTGCTGTTG----- mirL 22
-----CTGAGGTAGTAGTTTGTGCTG----- mirL 21
-----CTGAGGTAGTAGTTTGTGCT----- mirL 19
-----CTGAGGTAGTAGTTTGTGCTGT----- mirL 22
-----AGGTAGTAGTTTGTGCTG----- mirL 18
-----GAGGTAGTAGTTTGTGCT----- mirL 18
-----GGTAGTAGTTTGTGCTGTT----- mirL 19
-----AGGTAGTAGTTTGTGCTGTT----- mirL 20
-----GGTAGTAGTTTGTGCTGT----- mirL 18
-----GAGGTAGTAGTTTGTGCTGTTG----- mirL 23
-----AGGTAGTAGTTTGTGCTGT----- mirL 19
-----CTGAGGTAGTAGTTTGTGCT----- mirL 20
-----GGTAGTAGTTTGTGCTGTTG----- mirL 20
-----CTGAGGTAGTAGTTTGTGCTGTT----- mirL 23

```

```

-----GAGGTAGTAGTTTGTGCTGTTGGT----- mirL 24
-----AGGTAGTAGTTTGTGCTGTTG----- mirL 21
-----GCTGAGGTAGTAGTTTGTGCTGT----- mirL 23
-----CTGAGGTAGTAGTTTGTG----- mirL 18
-----CTGAGGTAGTAGTTTGTGCTGTTG----- mirL 24
-----GCTGAGGTAGTAGTTTGTGCT----- mirL 20
-----GGCTGAGGTAGTAGTTTGTGCT----- mirL 22
-----GGTAGTAGTTTGTGCTGTTGGT----- mirL 22
-----GGTAGTAGTTTGTGCTGTTGGTC----- mirL 23
-----GGTCGGGTTGTGACATTGCCCGCTGTGGAGATAAC----- loop 35
-----GGTCGGGTTGTGACATTGCCCGCTGTGGAGAT----- loop 32
-----GGTCGGGTTGTGACATTGCCCGCTGTGGAGATA----- loop 33
-----CTGCGCAAGCTACTGCCTTGCT----- mirR 22
-----CTGCGCAAGCTACTGCCTTGC----- mirR 21
-----CTGCGCAAGCTACTGCCTTGCTA----- mirR 23
-----CTGCGCAAGCTACTGCCTTG----- mirR 20
-----CTGCGCAAGCTACTGCCTT----- mirR 19
-----CTGCGCAAGCTACTGCCT----- mirR 18
-----CTGCGCAAGCTACTGCCTTGCTAG----- mirR 24
-----TGCGCAAGCTACTGCCTTGCT----- mirR 21
-----GCGCAAGCTACTGCCTTGCT----- mirR 20
-----TGCGCAAGCTACTGCCTTGC----- mirR 20
-----TGCGCAAGCTACTGCCTTG----- mirR 19
-----TGCGCAAGCTACTGCCTTGCTA----- mirR 22
-----TGCGCAAGCTACTGCCTT----- mirR 18
-----TGCGCAAGCTACTGCCTTGCTAG----- mirR 23
-----TGCGCAAGCTACTGCCTTGCTAGTG----- mirR 25
-----GCGCAAGCTACTGCCTTG----- mirR 18
-----CGCAAGCTACTGCCTTGCT----- mirR 19
-----AACTGCGCAAGCTACTGCCTTGC----- mirR 23
-----GCGCAAGCTACTGCCTTGC----- mirR 19
-----TGCTGGTGATGCTCAGCGC----- morR 19
-----TAGTGCTGGTGATGCTCAGCGCCGCGGAGGA morR 31
-----CTAGTGCTGGTGATGCTC----- morR 18
-----GCTAGTGCTGGTGATGCT----- morR 18

```

>mmu-mir-34b

| Sequence                                                                                              | species | len | reads |
|-------------------------------------------------------------------------------------------------------|---------|-----|-------|
| GCGCCCGTGCTCGGTTTGTAGGCAGTGTAATTAGCTGATTGTAGTGCGGTGCTGACAATCACTAACTCCACTGCCATCAAAACAAGGCACAGCATCACCCG | morL    | 18  | 10    |
| -CGCCCGTGCTCGGTTTGTAGGCAGTGTAATTAGCTGATTGTAGTGCGGTGCTGACAATCACTAACTCCACTGCCATCAAAACAAGGCACAGCATCACCCG | morL    | 18  | 3     |
| ---CCCGTGCTCGGTTTGTAGGCAGTGTAATTAGCTGATTGTAGTGCGGTGCTGACAATCACTAACTCCACTGCCATCAAAACAAGGCACAGCATCACCCG | morL    | 18  | 2     |
| --GCCCGTGCTCGGTTTGTAGGCAGTGTAATTAGCTGATTGTAGTGCGGTGCTGACAATCACTAACTCCACTGCCATCAAAACAAGGCACAGCATCACCCG | morL    | 19  | 1     |
| GCGCCCGTGCTCGGTTTGTAGGCAGTGTAATTAGCTGATTGTAGTGCGGTGCTGACAATCACTAACTCCACTGCCATCAAAACAAGGCACAGCATCACCCG | morL    | 19  | 1     |
| --GCCCGTGCTCGGTTTGTAGGCAGTGTAATTAGCTGATTGTAGTGCGGTGCTGACAATCACTAACTCCACTGCCATCAAAACAAGGCACAGCATCACCCG | mirL    | 23  | 35374 |
| -----AGGCAGTGTAATTAGCTGATTGTAGTGCGGTGCTGACAATCACTAACTCCACTGCCATCAAAACAAGGCACAGCATCACCCG               | mirL    | 22  | 4681  |
| -----TAGGCAGTGTAATTAGCTGATTGTAGTGCGGTGCTGACAATCACTAACTCCACTGCCATCAAAACAAGGCACAGCATCACCCG              | mirL    | 23  | 3188  |



```

-----TAGGCAGTGTAAATTAGCTGATTGT----- mirL 24 1963
-----AGGCAGTGTAAATTAGCTGATTGTA----- mirL 24 1540
-----AGGCAGTGTAAATTAGCTGATT----- mirL 21 1257
-----AGGCAGTGTAAATTAGCTGAT----- mirL 20 1144
-----TAGGCAGTGTAAATTAGCTGATT----- mirL 22 810
-----AGGCAGTGTAAATTAGCTGA----- mirL 19 513
-----TAGGCAGTGTAAATTAGCTGATTGTA----- mirL 25 378
-----TAGGCAGTGTAAATTAGCTGAT----- mirL 21 341
-----AGGCAGTGTAAATTAGCTGATTGTAG----- mirL 25 171
-----TAGGCAGTGTAAATTAGCTGA----- mirL 20 108
-----GGCAGTGTAAATTAGCTGATTG----- mirL 21 48
-----GGCAGTGTAAATTAGCTGATTGT----- mirL 22 45
-----TAGGCAGTGTAAATTAGCTG----- mirL 19 38
-----GCAGTGTAAATTAGCTGATTG----- mirL 20 22
-----GTAGGCAGTGTAAATTAGCTGATTGT----- mirL 25 11
-----CAGTGTAAATTAGCTGATTG----- mirL 19 8
-----GGCAGTGTAAATTAGCTGAT----- mirL 19 8
-----GGCAGTGTAAATTAGCTGATT----- mirL 20 7
-----CAGTGTAAATTAGCTGATTGTA----- mirL 21 5
-----GTAGGCAGTGTAAATTAGCTGATTG----- mirL 24 4
-----GGCAGTGTAAATTAGCTGATTGTA----- mirL 23 4
-----GCAGTGTAAATTAGCTGATT----- mirL 19 3
-----GCAGTGTAAATTAGCTGATTGT----- mirL 21 3
-----GGCAGTGTAAATTAGCTGA----- mirL 18 2
-----GGCAGTGTAAATTAGCTGATTGTAGT----- mirL 25 2
-----TGTAGGCAGTGTAAATTAG----- mirL 18 1
-----GCAGTGTAAATTAGCTGATTGTA----- mirL 22 1
-----TGTAGGCAGTGTAAATTAGCTGATTG----- mirL 25 1
-----CAGTGTAAATTAGCTGATT----- mirL 18 1
-----TGTAGTGCGGTGCTGACA----- loop 18 1
-----AATCACTAACTCCACTGCCATC----- mirR 22 23806
-----AATCACTAACTCCACTGCCAT----- mirR 21 6788
-----AATCACTAACTCCACTGCCATCA----- mirR 23 4957
-----CAATCACTAACTCCACTGCCAT----- mirR 22 3929
-----ATCACTAACTCCACTGCCATCA----- mirR 22 2658
-----ATCACTAACTCCACTGCCATC----- mirR 21 1884
-----AATCACTAACTCCACTGCG----- mirR 18 1073
-----AATCACTAACTCCACTGCCA----- mirR 20 1053
-----AATCACTAACTCCACTGCC----- mirR 19 984
-----CAATCACTAACTCCACTGCCATC----- mirR 23 786
-----AATCACTAACTCCACTGCCATCAA----- mirR 24 532
-----ATCACTAACTCCACTGCCAT----- mirR 20 527
-----CAATCACTAACTCCACTGCCA----- mirR 21 522
-----ATCACTAACTCCACTGCCATCAA----- mirR 23 245
-----CAATCACTAACTCCACTGCG----- mirR 19 140
-----CAATCACTAACTCCACTG----- mirR 18 131

```

```

-----ATCACTAACTCCACTGCC----- mirR 18 110
-----ATCACTAACTCCACTGCCA----- mirR 19 76
-----CACTAACTCCACTGCCATC----- mirR 19 76
-----CAATCACTAACTCCACTGCC----- mirR 20 75
-----TCACTAACTCCACTGCCAT----- mirR 19 74
-----CAATCACTAACTCCACTGCCATCA----- mirR 24 54
-----TCACTAACTCCACTGCCATC----- mirR 20 50
-----CACTAACTCCACTGCCAT----- mirR 18 35
-----TCACTAACTCCACTGCCATCA----- mirR 21 33
-----ATCACTAACTCCACTGCCATCAAA----- mirR 24 20
-----TCACTAACTCCACTGCCA----- mirR 18 16
-----CACTAACTCCACTGCCATCA----- mirR 20 16
-----TCACTAACTCCACTGCCATCAA----- mirR 22 6
-----ACAATCACTAACTCCACTGCCAT----- mirR 23 5
-----ACAATCACTAACTCCACTGCC----- mirR 21 2
-----ACAATCACTAACTCCACTGCCATC----- mirR 24 2
-----ACAATCACTAACTCCACTGCCATCA----- mirR 25 1
-----ACAAGGCACAGCATCACCCG morR 20 1
-----CAAAACAAGGCACAGCAT----- morR 18 1

```

>mmu-mir-708

```

ATGGGGACTGCCCTCAAGGAGCTTACAATCTAGCTGGGGGTAGATGACTTGCACTTGAACACAAGTACTGTGAGCTTCTAGAGGGCAGGGCCTTACCCT species len reads
ATGGGGACTGCCCTCAAG----- morL 18 1
-----AAGGAGCTTACAATCTAGCTGG----- mirL 22 44951
-----AAGGAGCTTACAATCTAGCTGG----- mirL 23 24079
-----AAGGAGCTTACAATCTAGCTG----- mirL 21 7430
-----AAGGAGCTTACAATCTAGC----- mirL 19 5002
-----AAGGAGCTTACAATCTAGCTGGG----- mirL 24 3506
-----AAGGAGCTTACAATCTAGCT----- mirL 20 2244
-----AAGGAGCTTACAATCTAGCTGGGG----- mirL 25 1488
-----AGGAGCTTACAATCTAGCTGGG----- mirL 22 704
-----AGGAGCTTACAATCTAGCTGG----- mirL 21 690
-----AGGAGCTTACAATCTAGCTGGG----- mirL 23 182
-----GAGCTTACAATCTAGCTGGG----- mirL 20 145
-----AGGAGCTTACAATCTAGCTG----- mirL 20 116
-----GGAGCTTACAATCTAGCTGGG----- mirL 21 109
-----GGAGCTTACAATCTAGCTGG----- mirL 20 80
-----AGGAGCTTACAATCTAGCTGGGG----- mirL 24 70
-----AGGAGCTTACAATCTAGC----- mirL 18 65
-----GAGCTTACAATCTAGCTGG----- mirL 19 64
-----AGGAGCTTACAATCTAGCTGGGGT----- mirL 25 43
-----GGAGCTTACAATCTAGCTG----- mirL 19 38
-----GGAGCTTACAATCTAGCTGGG----- mirL 22 26
-----GAGCTTACAATCTAGCTGGG----- mirL 21 23
-----CAAGGAGCTTACAATCTAGCTG----- mirL 22 18
-----CAAGGAGCTTACAATCTAGCTGG----- mirL 23 17

```

```

-----GAGCTTACAATCTAGCTG----- mirL 18 16
-----GGAGCTTACAATCTAGCT----- mirL 18 9
-----CAAGGAGCTTACAATCTAGCTGGG----- mirL 24 6
-----CAAGGAGCTTACAATCTAGCTGGGG----- mirL 25 3
-----GGAGCTTACAATCTAGCTGGGGG----- mirL 23 3
-----TCAAGGAGCTTACAATCTAG----- mirL 20 3
-----CAAGGAGCTTACAATCTAGCT----- mirL 21 2
-----CAAGGAGCTTACAATCTAGCTGGGG----- mirL 26 1
-----GGAGCTTACAATCTAGCTGGGGGT----- mirL 24 1
-----GAGCTTACAATCTAGCTGGGG----- mirL 22 1
-----CAAGGAGCTTACAATCTAG----- mirL 19 1
-----GAGCTTACAATCTAGCTGGGGGT----- mirL 23 1
-----GGTAGATGACTTGCACCTTGAA----- loop 21 3
-----GGTAGATGACTTGCACCTTGAAC----- loop 22 3
-----GGTAGATGACTTGCACCTTGAACA----- loop 23 2
-----GGTAGATGACTTGCACCTTGAACAC----- loop 24 1
-----CAACTAGACTGTGAGCTTCTA----- mirR 21 3445
-----CAACTAGACTGTGAGCTTCT----- mirR 20 1047
-----CAACTAGACTGTGAGCTTCTAG----- mirR 22 666
-----CAACTAGACTGTGAGCTTCT----- mirR 19 432
-----CAACTAGACTGTGAGCTT----- mirR 18 259
-----CAACTAGACTGTGAGCTTCTAGA----- mirR 23 236
-----AACTAGACTGTGAGCTTCTAGA----- mirR 22 124
-----CAACTAGACTGTGAGCTTCTAGAG----- mirR 24 118
-----AACTAGACTGTGAGCTTCTA----- mirR 20 116
-----AACTAGACTGTGAGCTTCT----- mirR 19 67
-----ACTAGACTGTGAGCTTCTA----- mirR 19 65
-----AACTAGACTGTGAGCTTCTAG----- mirR 21 62
-----AACTAGACTGTGAGCTTCTAGAG----- mirR 23 62
-----CTAGACTGTGAGCTTCTA----- mirR 18 44
-----ACTAGACTGTGAGCTTCTAGA----- mirR 21 23
-----AACTAGACTGTGAGCTTCT----- mirR 18 18
-----ACACAACCTAGACTGTGAGCTTCT----- mirR 22 17
-----ACTAGACTGTGAGCTTCT----- mirR 18 11
-----ACTAGACTGTGAGCTTCTAGAG----- mirR 22 11
-----AACTAGACTGTGAGCTTCTAGAGG----- mirR 24 8
-----ACTAGACTGTGAGCTTCTAG----- mirR 20 8
-----ACTAGACTGTGAGCTTCTAGAGG----- mirR 23 7
-----CTAGACTGTGAGCTTCTAG----- mirR 19 5
-----ACACAACCTAGACTGTGAGCTT----- mirR 21 5
-----ACAACCTAGACTGTGAGCTTCT----- mirR 21 3
-----ACAACCTAGACTGTGAGCTTCTA----- mirR 22 3
-----ACTAGACTGTGAGCTTCTAGAGG----- mirR 24 2
-----ACACAACCTAGACTGTGAGCTTCT----- mirR 23 2
-----CACACAACCTAGACTGTGAGCTTCT----- mirR 22 1
-----ACACAACCTAGACTGTGAG----- mirR 18 1

```

```
-----ACAACTAGACTGTGAGCTTCTAGAG----- mirR 25 1
-----ACACAACCTAGACTGTGAGCT----- mirR 20 1
-----GAGGGCAGGGGCCTTACC-- morR 18 1
-----GGGCAGGGGCCTTACCCT morR 18 1
```

>mmu-mir-666

```
AAGATCCTGATTCTGCCTGCGTGGAGCGGGCACAGCTGTGAGAGCCCCCTAGGTACAGCGGGGCTGCAGCGTGATCGCCTGCTCACG species len reads
-----TGATTCTGCCTGCGTGG----- morL 18 2
AAGATCCTGATTCTGCCTGCGTG----- morL 23 1
-----AGCGGGCACAGCTGTGAGAGCCCC----- mirL 25 502
-----AGCGGGCACAGCTGTGAGAGC----- mirL 21 447
-----AGCGGGCACAGCTGTGAGAG----- mirL 20 408
-----AGCGGGCACAGCTGTGAGA----- mirL 19 370
-----AGCGGGCACAGCTGTGAGAGCCC----- mirL 23 338
-----AGCGGGCACAGCTGTGAGAGCCCC----- mirL 24 314
-----AGCGGGCACAGCTGTGAGAGCC----- mirL 22 299
-----CGGGCACAGCTGTGAGAGC----- mirL 19 1
-----GCGGGCACAGCTGTGAGAGCCCC----- mirL 23 1
-----GAGCGGGCACAGCTGTGAGAGCC----- mirL 23 1
-----GAGCGGGCACAGCTGTGAGA----- mirL 20 1
-----GCGGGCACAGCTGTGAGAGC----- mirL 20 1
-----TGGAGCGGGCACAGCTGTGAGAG----- mirL 23 1
-----CGGGCACAGCTGTGAGAGCCC----- mirL 21 1
-----TGGAGCGGGCACAGCTGT----- mirL 18 1
-----GGGCACAGCTGTGAGAGCC----- mirL 19 1
-----GAGCGGGCACAGCTGTGAGAGCCC----- mirL 24 1
-----GGCTGCAGCGTGATCGCCTGCTC----- mirR 23 27681
-----GGCTGCAGCGTGATCGCCTGCTCA-- mirR 24 21476
-----GGCTGCAGCGTGATCGCCTGCTCAC-- mirR 25 10048
-----GGCTGCAGCGTGATCGCCTGCT---- mirR 22 9376
-----GGCTGCAGCGTGATCGCCTGC----- mirR 21 9108
-----GGCTGCAGCGTGATCGCC----- mirR 18 8999
-----GGCTGCAGCGTGATCGCCT----- mirR 19 2643
-----GCTGCAGCGTGATCGCCTGCTC-- mirR 22 1966
-----GCTGCAGCGTGATCGCCTGCTCA-- mirR 23 1678
-----GCTGCAGCGTGATCGCCTGCTCAC-- mirR 24 953
-----GCTGCAGCGTGATCGCCTGCT---- mirR 21 376
-----GCTGCAGCGTGATCGCCTGC----- mirR 20 374
-----GCTGCAGCGTGATCGCCTGCTCACG mirR 25 185
-----GCTGCAGCGTGATCGCCT----- mirR 18 159
-----CTGCAGCGTGATCGCCTGCT---- mirR 20 28
-----CTGCAGCGTGATCGCCTGCTCA-- mirR 22 23
-----CTGCAGCGTGATCGCCTGCTC-- mirR 21 13
-----GGGCTGCAGCGTGATCGCCTGCT---- mirR 23 11
-----GGGCTGCAGCGTGATCGCCTGCTC-- mirR 24 7
-----CTGCAGCGTGATCGCCTGC----- mirR 19 4
```

```

-----GGGCTGCAGCGTGATCGCCTGC----- mirR 22 4
-----GGGCTGCAGCGTGATCGCCTGCTCA-- mirR 25 4
-----CTGCAGCGTGATCGCCTGCTCAC- mirR 23 3
-----GGGCTGCAGCGTGATCGCCTGCTCAC- mirR 26 3
-----TGCAGCGTGATCGCCTGCT---- mirR 19 3
-----CTGCAGCGTGATCGCCTGCTCACG mirR 24 2
-----GGGCTGCAGCGTGATCGC----- mirR 18 2
-----CTGCAGCGTGATCGCCTG----- mirR 18 2
-----CGGGGCTGCAGCGTGATCGCCTGCTCA-- mirR 27 1
-----GGGCTGCAGCGTGATCGCCTG----- mirR 21 1
-----GGGGCTGCAGCGTGATCG----- mirR 18 1
-----GGGGCTGCAGCGTGATCGCC----- mirR 20 1
-----GGGGCTGCAGCGTGATCGCCTGCTC-- mirR 25 1
-----GGGGCTGCAGCGTGATCGC----- mirR 19 1

```

>mmu-mir-376b

| Sequence                                                                       | species | len | reads |
|--------------------------------------------------------------------------------|---------|-----|-------|
| TCTTTGGTATTTAAAAGGTGGATATTCCTTCTATGGTTACGTGCTTCTCGGATAATCATAGAGGAACATCCACTTTTT | morL    | 18  | 3     |
| TCTTTGGTATTTAAAAGG-----                                                        | morL    | 18  | 1     |
| -CTTTGGTATTTAAAAGGT-----                                                       | morL    | 19  | 1     |
| TCTTTGGTATTTAAAAGGT-----                                                       | mirL    | 22  | 5892  |
| -----GTGGATATTCCTTCTATGGTTA-----                                               | mirL    | 21  | 2749  |
| -----GTGGATATTCCTTCTATGGTT-----                                                | mirL    | 23  | 1903  |
| -----GTGGATATTCCTTCTATGGTTAC-----                                              | mirL    | 19  | 835   |
| -----GTGGATATTCCTTCTATGG-----                                                  | mirL    | 20  | 780   |
| -----TGGATATTCCTTCTATGGTTA-----                                                | mirL    | 21  | 306   |
| -----GGTGGATATTCCTTCTATGGTTA-----                                              | mirL    | 23  | 149   |
| -----GGTGGATATTCCTTCTATGGTT-----                                               | mirL    | 22  | 120   |
| -----TGGATATTCCTTCTATGGTTAC-----                                               | mirL    | 22  | 120   |
| -----GTGGATATTCCTTCTATGGTTACG-----                                             | mirL    | 24  | 97    |
| -----TGGATATTCCTTCTATGGTT-----                                                 | mirL    | 20  | 63    |
| -----GGTGGATATTCCTTCTATGGTTAC-----                                             | mirL    | 24  | 59    |
| -----TGGATATTCCTTCTATGGTTACG-----                                              | mirL    | 23  | 53    |
| -----GGTGGATATTCCTTCTATGGTT-----                                               | mirL    | 21  | 42    |
| -----GTGGATATTCCTTCTATGGTTACGT-----                                            | mirL    | 25  | 42    |
| -----GGTGGATATTCCTTCTATGG-----                                                 | mirL    | 20  | 35    |
| -----TGGATATTCCTTCTATGG-----                                                   | mirL    | 18  | 28    |
| -----GATATTCCTTCTATGGTTA-----                                                  | mirL    | 19  | 20    |
| -----TGGATATTCCTTCTATGGTTACGT-----                                             | mirL    | 24  | 20    |
| -----GGATATTCCTTCTATGGTTA-----                                                 | mirL    | 20  | 15    |
| -----TGGATATTCCTTCTATGGTT-----                                                 | mirL    | 19  | 12    |
| -----AAGGTGGATATTCCTTCTATGGTT-----                                             | mirL    | 23  | 9     |
| -----GGATATTCCTTCTATGGTT-----                                                  | mirL    | 19  | 9     |
| -----GGATATTCCTTCTATGGTTAC-----                                                | mirL    | 21  | 5     |
| -----GGTGGATATTCCTTCTATGGTTACG-----                                            | mirL    | 25  | 3     |
| -----GGATATTCCTTCTATGGTT-----                                                  | mirL    | 18  | 3     |

```

-----GATATTCCTTCTATGGTTAC----- mirL 20 3
-----GATATTCCTTCTATGGTT----- mirL 18 3
-----GGATATTCCTTCTATGGTTACG----- mirL 22 2
-----AGGTGGATATTCCTTCTATGGT----- mirL 22 1
-----GGATATTCCTTCTATGGTTACGTG----- mirL 24 1
-----ACGTGCTTCCTGGATAAT----- loop 18 1
-----CGTGCTTCCTGGATAATC----- loop 18 1
-----TTACGTGCTTCCTGGATA----- loop 18 1
-----ATCATAGAGGAACATCCACTT--- mirR 21 75170
-----ATCATAGAGGAACATCCACTTT-- mirR 22 3527
-----ATCATAGAGGAACATCCACT--- mirR 20 2782
-----ATCATAGAGGAACATCCAC---- mirR 19 865
-----ATCATAGAGGAACATCCA----- mirR 18 657
-----ATCATAGAGGAACATCCACTTTT- mirR 23 299
-----CATAGAGGAACATCCACTT--- mirR 19 258
-----AATCATAGAGGAACATCCACTT--- mirR 22 154
-----ATAGAGGAACATCCACTT--- mirR 18 124
-----TCATAGAGGAACATCCACTT--- mirR 20 97
-----ATCATAGAGGAACATCCACTTTTT mirR 24 25
-----TCATAGAGGAACATCCACTTTT-- mirR 21 24
-----CATAGAGGAACATCCACTTT-- mirR 20 21
-----CATAGAGGAACATCCACT--- mirR 18 21
-----ATAGAGGAACATCCACTTT-- mirR 19 19
-----TCATAGAGGAACATCCACT--- mirR 19 17
-----TCATAGAGGAACATCCACTTTTT- mirR 22 13
-----AATCATAGAGGAACATCCACT--- mirR 21 11
-----AATCATAGAGGAACATCCA----- mirR 19 11
-----TAATCATAGAGGAACATCCAC---- mirR 21 8
-----TAATCATAGAGGAACATCCACTT--- mirR 23 8
-----ATAATCATAGAGGAACATCCACTT--- mirR 24 8
-----TAATCATAGAGGAACATCCACT--- mirR 22 8
-----TCATAGAGGAACATCCAC---- mirR 18 6
-----AATCATAGAGGAACATCCACTTT-- mirR 23 4
-----AATCATAGAGGAACATCCAC---- mirR 20 3
-----CATAGAGGAACATCCACTTTTT- mirR 21 3
-----AATCATAGAGGAACATCC----- mirR 18 2
-----TAATCATAGAGGAACATCCA----- mirR 20 2
-----ATAATCATAGAGGAACATCCAC---- mirR 22 2
-----ATAGAGGAACATCCACTTTTT- mirR 20 2
-----TCATAGAGGAACATCCACTTTTT mirR 23 1
-----TAATCATAGAGGAACATCC----- mirR 19 1

```

>mmu-mir-16-1

```

ATAGCAATGTCAGCGGTGCCTTAGCAGCACGTAAATATTGGCGTTAAGATTCTGAAATTACCTCCAGTATTGACTGTGCTGCTGAAGTAAGGTTGGCAATACT species len reads
--AGCAATGTCAGCGGTGCCT----- morL 19 31
-TAGCAATGTCAGCGGTGCCT----- morL 20 30

```

```

-TAGCAATGTCAGCGGTGCC----- morL 19 5
ATAGCAATGTCAGCGGTGCCT----- morL 21 5
---GCAATGTCAGCGGTGCCT----- morL 18 5
--AGCAATGTCAGCGGTGCCT----- morL 20 3
---GCAATGTCAGCGGTGCCT----- morL 19 3
---CAATGTCAGCGGTGCCT----- morL 18 3
--AGCAATGTCAGCGGTGCCTTA----- morL 21 1
-TAGCAATGTCAGCGGTGCCT----- morL 21 1
-TAGCAATGTCAGCGGTGC----- morL 18 1
-----TAGCAGCACGTAAATATTGGCGT----- mirL 23 32764
-----TAGCAGCACGTAAATATTGGC----- mirL 21 20042
-----TAGCAGCACGTAAATATTGGCG----- mirL 22 16041
-----TAGCAGCACGTAAATATTGGCGTT----- mirL 24 10263
-----TAGCAGCACGTAAATATTGG----- mirL 20 9023
-----TAGCAGCACGTAAATATTG----- mirL 19 2543
-----TAGCAGCACGTAAATATTGGCGTTA----- mirL 25 1802
-----AGCAGCACGTAAATATTGGCGT----- mirL 22 1278
-----AGCAGCACGTAAATATTGGCG----- mirL 21 558
-----AGCAGCACGTAAATATTGGC----- mirL 20 552
-----AGCAGCACGTAAATATTGGCGTT----- mirL 23 385
-----AGCAGCACGTAAATATTGG----- mirL 19 250
-----AGCAGCACGTAAATATTGGCGTTA----- mirL 24 80
-----AGCAGCACGTAAATATTG----- mirL 18 72
-----GCAGCACGTAAATATTGGCGT----- mirL 21 15
-----TTAGCAGCACGTAAATATTGGCGT----- mirL 24 11
-----TTAGCAGCACGTAAATATTGGC----- mirL 22 11
-----CAGCACGTAAATATTGGCG----- mirL 19 10
-----GCAGCACGTAAATATTGGC----- mirL 19 10
-----GCAGCACGTAAATATTGGCG----- mirL 20 8
-----CAGCACGTAAATATTGGC----- mirL 18 7
-----TTAGCAGCACGTAAATATTGGCG----- mirL 23 5
-----CAGCACGTAAATATTGGCGT----- mirL 20 5
-----CTTAGCAGCACGTAAATATTGGCGT----- mirL 25 3
-----CAGCACGTAAATATTGGCGTT----- mirL 21 3
-----TTAGCAGCACGTAAATATT----- mirL 19 3
-----GCAGCACGTAAATATTGGCGTT----- mirL 22 2
-----CAGCACGTAAATATTGGCGTTA----- mirL 22 2
-----GCAGCACGTAAATATTGGCGTTA----- mirL 23 2
-----GCAGCACGTAAATATTGG----- mirL 18 2
-----CCTTAGCAGCACGTAAATATTGG----- mirL 23 1
-----TTAGCAGCACGTAAATAT----- mirL 18 1
-----CTTAGCAGCACGTAAATATTGGC----- mirL 23 1
-----CTTAGCAGCACGTAAATAT----- mirL 19 1
-----TTAGCAGCACGTAAATATTGG----- mirL 21 1
-----TTAGCAGCACGTAAATATTG----- mirL 20 1
-----TTAAGATTCTGAAATTACCT----- loop 20 12

```

```

-----TAAGATTCTGAAATTACCT----- loop 19 4
-----TTAAGATTCTGAAATTACCTC----- loop 21 4
-----TTAAGATTCTGAAATTACC----- loop 19 1
-----CCAGTATTGACTGTGCTGCTGA----- mirR 22 266
-----CCAGTATTGACTGTGCTGCTGAA----- mirR 23 50
-----CCAGTATTGACTGTGCTGCTGC----- mirR 19 26
-----CCAGTATTGACTGTGCTGCTG----- mirR 21 23
-----AGTATTGACTGTGCTGCTGA----- mirR 20 23
-----GTATTGACTGTGCTGCTGA----- mirR 19 23
-----CCAGTATTGACTGTGCTG----- mirR 18 20
-----TCCAGTATTGACTGTGCTGCTGA----- mirR 23 12
-----CCAGTATTGACTGTGCTGCT----- mirR 20 9
-----CCAGTATTGACTGTGCTGCTGAAG----- mirR 24 9
-----GTATTGACTGTGCTGCTG----- mirR 18 8
-----TCCAGTATTGACTGTGCTGCTG----- mirR 22 5
-----CAGTATTGACTGTGCTGCTGA----- mirR 21 5
-----CTCCAGTATTGACTGTGCTGCTGA----- mirR 24 4
-----AGTATTGACTGTGCTGCTG----- mirR 19 4
-----TCCAGTATTGACTGTGCTGCTGAA----- mirR 24 4
-----GTATTGACTGTGCTGCTGAA----- mirR 20 3
-----CTCCAGTATTGACTGTGC----- mirR 18 3
-----CTCCAGTATTGACTGTGCTG----- mirR 20 2
-----TCCAGTATTGACTGTGCTGCTGC----- mirR 20 2
-----TCCAGTATTGACTGTGCTGCT----- mirR 21 2
-----AGTATTGACTGTGCTGCTGAA----- mirR 21 2
-----CTCCAGTATTGACTGTGCTGCT----- mirR 22 2
-----CCTCCAGTATTGACTGTGCTGC----- mirR 22 1
-----TCCAGTATTGACTGTGCT----- mirR 18 1
-----AGTATTGACTGTGCTGCT----- mirR 18 1
-----CTCCAGTATTGACTGTGCTGCTG----- mirR 23 1
-----CTCCAGTATTGACTGTGCTGCTGAA----- mirR 25 1
-----CCTCCAGTATTGACTGTG----- mirR 18 1
-----AAGTAAGGTTGGCAATACT morR 19 1
-----AGTAAGGTTGGCAATACT morR 18 1
-----GAAGTAAGGTTGGCAATACT morR 20 1

>mmu-mir-361
TCTTTCTTGGGACTCGGAAGCTTATCAGAATCTCCAGGGTACTTAGTATTTGAAAAGTCCCCAGGTGTGATTCTGATTGTTCCCTCTCCTGCTCCTCCTCCTCCTC species len reads
--TTTCTTGGGACTCGGAAG----- morL 18 2
-----TTGGGACTCGGAAGCTTA----- morL 18 1
---TTCTTGGGACTCGGAAGCT----- morL 19 1
TCTTTCTTGGGACTCGGAAGCTTTATCAGAATCTCCAGGGTACTTAGTATTTGAAAAGTCCCCAGGTGTGATTCTGATTGTTCCCTCTCCTGCTCCTCCTCCTCCTC morL 19 1
-----TTATCAGAATCTCCAGGGGTAC----- mirL 22 56343
-----TTATCAGAATCTCCAGGGGTACT----- mirL 23 4930
-----TTATCAGAATCTCCAGGGGTA----- mirL 21 4111
-----TATCAGAATCTCCAGGGGTAC----- mirL 21 3194

```



```

-----TTATCAGAATCTCCAGGGGT----- mirL 20 1548
-----TTATCAGAATCTCCAGGGGTACTT----- mirL 24 1066
-----TTATCAGAATCTCCAGGGG----- mirL 19 880
-----TTATCAGAATCTCCAGGG----- mirL 18 572
-----TATCAGAATCTCCAGGGGTACT----- mirL 22 429
-----TATCAGAATCTCCAGGGGTA----- mirL 20 291
-----TATCAGAATCTCCAGGGGTACTT----- mirL 23 102
-----TATCAGAATCTCCAGGGGT----- mirL 19 100
-----ATCAGAATCTCCAGGGGTAC----- mirL 20 99
-----TATCAGAATCTCCAGGGG----- mirL 18 56
-----TCAGAATCTCCAGGGGTAC----- mirL 19 55
-----CTTATCAGAATCTCCAGGGGTAC----- mirL 23 28
-----TATCAGAATCTCCAGGGGTACTTA----- mirL 24 15
-----ATCAGAATCTCCAGGGGTACT----- mirL 21 11
-----ATCAGAATCTCCAGGGGTA----- mirL 19 9
-----TCAGAATCTCCAGGGGTA----- mirL 18 7
-----ATCAGAATCTCCAGGGGT----- mirL 18 6
-----CTTATCAGAATCTCCAGGGGTA----- mirL 22 3
-----TCAGAATCTCCAGGGGTACT----- mirL 20 3
-----ATCAGAATCTCCAGGGGTACTT----- mirL 22 2
-----CTTATCAGAATCTCCAGG----- mirL 18 2
-----AGCTTATCAGAATCTCCAGGG----- mirL 21 2
-----CTTATCAGAATCTCCAGGGGTACT----- mirL 24 2
-----CTTATCAGAATCTCCAGGGGT----- mirL 21 2
-----TCAGAATCTCCAGGGGTACTT----- mirL 21 2
-----AGCTTATCAGAATCTCCAGG----- mirL 20 1
-----CTTATCAGAATCTCCAGGGG----- mirL 20 1
-----GCTTATCAGAATCTCCAGGGGT----- mirL 22 1
-----AGCTTATCAGAATCTCCAGGGGTAC----- mirL 25 1
-----AGCTTATCAGAATCTCCAGGGGTACT----- mirL 26 1
-----ACTTAGTATTTGAAAAGT----- loop 18 1
-----TACTTAGTATTTGAAAAG----- loop 18 1
-----ACTTAGTATTTGAAAAGTCC----- loop 20 1
-----CCCCCAGGTGTGATTCTGATTTGT----- mirR 24 3529
-----TCCCCCAGGTGTGATTCTGATTT----- mirR 23 3272
-----TCCCCCAGGTGTGATTCTGATT----- mirR 22 2785
-----CCCCCAGGTGTGATTCTGATTTG----- mirR 23 2228
-----TCCCCCAGGTGTGATTCTGATTTG----- mirR 24 1802
-----CCCCCAGGTGTGATTCTGATTT----- mirR 22 1692
-----CCCCCAGGTGTGATTCTGATTTGTT----- mirR 25 1339
-----TCCCCCAGGTGTGATTCTGATTTGT----- mirR 25 1209
-----CCCCCAGGTGTGATTCTGATT----- mirR 21 666
-----TCCCCCAGGTGTGATTCTGAT----- mirR 21 620
-----CCCCCAGGTGTGATTCTGAT----- mirR 20 386
-----TCCCCCAGGTGTGATTCTGA----- mirR 20 365
-----TCCCCCAGGTGTGATTCTG----- mirR 19 326

```

```

-----CCCCCAGGTGTGATTCTGA----- mirR 19 226
-----CCCCAGGTGTGATTCTGATTT----- mirR 21 37
-----CCCCAGGTGTGATTCTGATT----- mirR 20 14
-----CCAGGTGTGATTCTGATTT----- mirR 19 13
-----CCCAGGTGTGATTCTGATT----- mirR 19 12
-----CCCAGGTGTGATTCTGATTT----- mirR 20 10
-----CCAGGTGTGATTCTGATT----- mirR 18 10
-----CCCCAGGTGTGATTCTGATTTGT----- mirR 23 8
-----CCCCAGGTGTGATTCTGATTTG----- mirR 22 7
-----GTCCCCCAGGTGTGATTCTGATT----- mirR 23 4
-----CCCCAGGTGTGATTCTGAT----- mirR 19 3
-----CCCAGGTGTGATTCTGAT----- mirR 18 3
-----CCCAGGTGTGATTCTGATTTG----- mirR 21 2
-----CCAGGTGTGATTCTGATTTG----- mirR 20 2
-----CCCCAGGTGTGATTCTGA----- mirR 18 2
-----CCCAGGTGTGATTCTGATTTGT----- mirR 22 1
-----GTCCCCCAGGTGTGATTC----- mirR 18 1
-----CCCCAGGTGTGATTCTGATTTGTT----- mirR 25 1
-----CCAGGTGTGATTCTGATTTGT----- mirR 21 1
-----GTCCCCCAGGTGTGATTCTGAT----- mirR 22 1
-----CCTCTCCTGCTCCTCCTCC----- morR 19 7
-----TCCCTCTCCTGCTCCTCCTC----- morR 20 6
-----TCCCTCTCCTGCTCCTCCTCC----- morR 21 4
-----TCCCTCTCCTGCTCCTCC----- morR 18 3
-----CCTCTCCTGCTCCTCCTC----- morR 21 3
-----TCCCTCTCCTGCTCCTCCTCCTCC morR 27 2
-----GTTTCCCTCTCCTGCTCC----- morR 18 2
-----CCCTCTCCTGCTCCTCCTCC----- morR 20 2
-----TCCCTCTCCTGCTCCTCCTCCTCC--- morR 24 2
-----CCCTCTCCTGCTCCTCCT----- morR 18 2
-----TTCCCTCTCCTGCTCCTCCTC----- morR 21 1
-----CCTCTCCTGCTCCTCCTC----- morR 18 1
-----TGTTTCCCTCTCCTGCTCCTC----- morR 21 1
-----TTCCCTCTCCTGCTCCTCCTCC----- morR 22 1
-----TCCCTCTCCTGCTCCTCCTCCT-- morR 25 1
-----TTCCCTCTCCTGCTCCTCC----- morR 20 1
-----CCTCTCCTGCTCCTCCTCCT----- morR 20 1
-----CCTCTCCTGCTCCTCCTCCTCC--- morR 22 1
-----TGTTTCCCTCTCCTGCTCC----- morR 19 1
-----TCCCTCTCCTGCTCCTCCTCCT--- morR 22 1
-----TTTCCCTCTCCTGCTCCT----- morR 18 1

```

>mmu-mir-137

```

CCCTCTGACTCTCTTCGGTGACGGGTATTCTTGGGTGGATAATACGGATTACGTTGTTATTGCTTAAGAATACGCGTAGTCGAGGAGAGTACCAGCGGCA species len reads
---TCTGACTCTCTTCGGTGACG----- morL 20 14
CCCTCTGACTCTCTTCGG----- morL 18 5

```

```

---TCTGACTCTCTTCGGTGAC----- morL 19 5
---TCTGACTCTCTTCGGTGA----- morL 18 3
-CCTCTGACTCTCTTCGGT----- morL 18 3
CCCTCTGACTCTCTTCGGTG----- morL 20 1
----CTGACTCTCTTCGGTGACG----- morL 19 1
-----ACGGGTATTCTTGGGTGGATAA----- mirL 22 649
-----ACGGGTATTCTTGGGTGGATAAT----- mirL 23 334
-----ACGGGTATTCTTGGGTGGAT----- mirL 20 300
-----ACGGGTATTCTTGGGTGGATA----- mirL 21 230
-----ACGGGTATTCTTGGGTGGATAATA----- mirL 24 61
-----ACGGGTATTCTTGGGTGG----- mirL 18 46
-----ACGGGTATTCTTGGGTGGATAATAC----- mirL 25 45
-----GACGGGTATTCTTGGGTGGAT----- mirL 21 31
-----GACGGGTATTCTTGGGTGGATA----- mirL 22 19
-----GACGGGTATTCTTGGGTGGATAA----- mirL 23 19
-----GACGGGTATTCTTGGGTGG----- mirL 20 5
-----GACGGGTATTCTTGGGTGG----- mirL 19 5
-----GACGGGTATTCTTGGGTG----- mirL 18 2
-----GGGTATTCTTGGGTGGAT----- mirL 18 1
-----GACGGGTATTCTTGGGTGGATAAT----- mirL 24 1
-----CGGGTATTCTTGGGTGGATAAT----- mirL 22 1
-----CGGGTATTCTTGGGTGGATAA----- mirL 21 1
-----GTGACGGGTATTCTTGGGT----- mirL 19 1
-----ATACGGATTACGTTGTTA----- loop 18 3
-----TAATACGGATTACGTTGTT----- loop 19 2
-----AATACGGATTACGTTGTTA----- loop 19 1
-----AATACGGATTACGTTGTT----- loop 18 1
-----TTATTGCTTAAGAATACGCGTAG----- mirR 23 28167
-----TTATTGCTTAAGAATACGCGTA----- mirR 22 11934
-----TTATTGCTTAAGAATACGCGT----- mirR 21 10573
-----ATTGCTTAAGAATACGCGTAG----- mirR 21 8563
-----TATTGCTTAAGAATACGCGTAG----- mirR 22 8342
-----TATTGCTTAAGAATACGCGTAGT----- mirR 23 4523
-----TTATTGCTTAAGAATACGCGTAGT----- mirR 24 3340
-----TTATTGCTTAAGAATACGC----- mirR 19 3291
-----TATTGCTTAAGAATACGCGTAGTC----- mirR 24 2548
-----TATTGCTTAAGAATACGCGT----- mirR 20 2240
-----ATTGCTTAAGAATACGCGTAGT----- mirR 22 1597
-----TTATTGCTTAAGAATACGCG----- mirR 20 1581
-----TATTGCTTAAGAATACGCGTA----- mirR 21 1143
-----TTATTGCTTAAGAATACG----- mirR 18 948
-----ATTGCTTAAGAATACGCGTAGTC----- mirR 23 680
-----TATTGCTTAAGAATACGC----- mirR 18 523
-----ATTGCTTAAGAATACGCGTA----- mirR 20 457
-----TATTGCTTAAGAATACGCG----- mirR 19 400
-----TTGCTTAAGAATACGCGTAG----- mirR 20 348

```

```

-----TTGCTTAAGAATACGCGTAGT----- mirR 21 249
-----ATTGCTTAAGAATACGCGT----- mirR 19 230
-----TTGCTTAAGAATACGCGTAGTC----- mirR 22 128
-----ATTGCTTAAGAATACGCG----- mirR 18 66
-----TTGCTTAAGAATACGCGTA----- mirR 19 59
-----ATTGCTTAAGAATACGCGTAGTCG----- mirR 24 31
-----TTGCTTAAGAATACGCGT----- mirR 18 29
-----TTGCTTAAGAATACGCGTAGTCG----- mirR 23 11
-----GTTATTGCTTAAGAATACGCGTA----- mirR 23 8
-----TTGCTTAAGAATACGCGTAGTCGA----- mirR 24 6
-----GTTATTGCTTAAGAATACGCGTAG----- mirR 24 5
-----GTTATTGCTTAAGAATACGCGT----- mirR 22 3
-----TGTTATTGCTTAAGAATACGCGT----- mirR 23 2
-----GTTATTGCTTAAGAATACGCG----- mirR 21 2
-----GTTATTGCTTAAGAATAC----- mirR 18 2
-----GTTATTGCTTAAGAATACG----- mirR 19 1
-----TTGTTATTGCTTAAGAATACGCGT----- mirR 24 1
-----TGTTATTGCTTAAGAATACGCGTAG----- mirR 25 1
-----GTTATTGCTTAAGAATACGC----- mirR 20 1
-----TGTTATTGCTTAAGAATAC----- mirR 19 1
-----TTGTTATTGCTTAAGAATACGCGTAGT----- mirR 27 1
-----TGTTATTGCTTAAGAATACGC----- mirR 21 1
-----AGTCGAGGAGAGTACCAGC---- morR 19 1
-----AGGAGAGTACCAGCGGCA morR 18 1
-----CGAGGAGAGTACCAGCGG-- morR 18 1

```

>mmu-mir-16-2

```

TCTGACATGCTTGTCCACTCTAGCAGCACGTAAATATTGGCGTAGTGAATAAATATTTAAACACCAATATTATTGTGCTGCTTTAG species len reads
-CTGACATGCTTGTCCACTC----- morL 20 3
TCTGACATGCTTGTCCACT----- morL 20 1
TCTGACATGCTTGTCCACT----- morL 18 1
-----TAGCAGCACGTAAATATTGGCGT----- mirL 23 32764
-----TAGCAGCACGTAAATATTGGC----- mirL 21 20040
-----TAGCAGCACGTAAATATTGGCG----- mirL 22 16041
-----TAGCAGCACGTAAATATTGG----- mirL 20 9021
-----TAGCAGCACGTAAATATTGGCGTA----- mirL 24 7511
-----TAGCAGCACGTAAATATTG----- mirL 19 2548
-----TAGCAGCACGTAAATATTGGCGTAG----- mirL 25 1787
-----AGCAGCACGTAAATATTGGCGT----- mirL 22 1278
-----AGCAGCACGTAAATATTGGCG----- mirL 21 558
-----AGCAGCACGTAAATATTGGC----- mirL 20 552
-----AGCAGCACGTAAATATTGGCGTA----- mirL 23 292
-----AGCAGCACGTAAATATTGG----- mirL 19 250
-----AGCAGCACGTAAATATTG----- mirL 18 72
-----AGCAGCACGTAAATATTGGCGTAG----- mirL 24 69
-----GCAGCACGTAAATATTGGCGT----- mirL 21 15

```

C:\Documents and Settings\hong\Desktop\Hippocampus-total RNA.txt

```
-----CAGCACGTAAATATTGGCG----- mirL 19 10
-----GCAGCACGTAAATATTGGC----- mirL 19 10
-----GCAGCACGTAAATATTGGCG----- mirL 20 8
-----CAGCACGTAAATATTGGC----- mirL 18 7
-----CTAGCAGCACGTAAATATTGGCGT----- mirL 24 6
-----CAGCACGTAAATATTGGCGT----- mirL 20 5
-----CTAGCAGCACGTAAATATTGGC----- mirL 22 4
-----GCAGCACGTAAATATTGGCGTA----- mirL 22 4
-----GCAGCACGTAAATATTGGCGTAG----- mirL 23 3
-----GCAGCACGTAAATATTGG----- mirL 18 2
-----CTAGCAGCACGTAAATATTGGCGTA----- mirL 25 2
-----CTAGCAGCACGTAAATATTGG----- mirL 21 2
-----CTAGCAGCACGTAAATATTGGCG----- mirL 23 2
-----CTAGCAGCACGTAAATATT----- mirL 19 1
-----CTCTAGCAGCACGTAAAT----- mirL 18 1
-----CAGCACGTAAATATTGGCGTAG----- mirL 22 1
-----CAGCACGTAAATATTGGCGTA----- mirL 21 1
-----TCTAGCAGCACGTAAATATTGGC----- mirL 23 1
-----CTAGCAGCACGTAAATATTG----- mirL 20 1
-----TGAAATAAATATTTAAAC----- loop 19 1
-----GTGAAATAAATATTTAAAC----- loop 18 1
-----ACCAATATTATTGTGCTGCTTT-- mirR 22 190
-----CCAATATTATTGTGCTGCTTTA-- mirR 22 137
-----CCAATATTATTGTGCTGCTTT-- mirR 21 130
-----ACCAATATTATTGTGCTGCTT--- mirR 21 100
-----CCAATATTATTGTGCTGCTT--- mirR 20 51
-----ACCAATATTATTGTGCTGCTTTA-- mirR 23 42
-----ACCAATATTATTGTGCTGCT---- mirR 20 31
-----ACCAATATTATTGTGCTGC----- mirR 19 27
-----CCAATATTATTGTGCTGCTTTAG-- mirR 23 21
-----CCAATATTATTGTGCTGCT---- mirR 19 18
-----CCAATATTATTGTGCTGC----- mirR 18 11
-----ACCAATATTATTGTGCTG----- mirR 18 7
-----ACCAATATTATTGTGCTGCTTTAG-- mirR 24 2
-----AATATTATTGTGCTGCTTT-- mirR 19 1
-----CAATATTATTGTGCTGCTTT-- mirR 20 1
-----AATATTATTGTGCTGCTTTA-- mirR 20 1
-----CAATATTATTGTGCTGCTTTA-- mirR 21 1
-----AATATTATTGTGCTGCTT--- mirR 18 1
-----CAATATTATTGTGCTGCTT--- mirR 19 1
```

>mmu-mir-301a

```
GCTCACTCCTGCTAACGGCTGCTCTGACTTTATTGCACTACTGTACTTTACAGCGAGCAGTGCAATAGTATTGTCAAAGCATCCGCGAGCAGGTTGCACACCTTTCCTGGTTCTTGT species len reads
--TCACTCCTGCTAACGGCTG----- morL 19 3
----CTCCTGCTAACGGCTGCT----- morL 18 2
-CTCACTCCTGCTAACGGCT----- morL 19 1
```

```

GCTCACTCCTGCTAACGGCT----- morL 20 1
GCTCACTCCTGCTAACGGCTG----- morL 21 1
-----GCTCTGACTTTATTGCACTAC----- mirL 21 575
-----GCTCTGACTTTATTGCACTACT----- mirL 22 155
-----GCTCTGACTTTATTGCACTA----- mirL 20 113
-----GCTCTGACTTTATTGCACT----- mirL 19 29
-----GCTCTGACTTTATTGCACTACTG----- mirL 23 16
-----GCTCTGACTTTATTGCAC----- mirL 18 9
-----GCTCTGACTTTATTGCACTACTGT----- mirL 24 4
-----CTCTGACTTTATTGCACTA----- mirL 19 3
-----GCTGCTCTGACTTTATTGCACT----- mirL 22 1
-----CTGACTTTATTGCACTAC----- mirL 18 1
-----CTCTGACTTTATTGCACTAC----- mirL 20 1
-----ACTGTACTTTACAGCGAG----- loop 18 1
-----CAGTGCAATAGTATTGTCAAAGCAT----- mirR 25 27584
-----CAGTGCAATAGTATTGTCAAAGC----- mirR 23 25849
-----CAGTGCAATAGTATTGTCAA----- mirR 21 10608
-----CAGTGCAATAGTATTGTCAAAGCA----- mirR 24 10254
-----CAGTGCAATAGTATTGTCAA----- mirR 20 5872
-----CAGTGCAATAGTATTGTCA----- mirR 19 3953
-----CAGTGCAATAGTATTGTCAAAG----- mirR 22 3755
-----AGTGCAATAGTATTGTCAAAGCAT----- mirR 24 461
-----AGTGCAATAGTATTGTCAAAGC----- mirR 22 298
-----GTGCAATAGTATTGTCAAAGCAT----- mirR 23 185
-----AGTGCAATAGTATTGTCAAAGCA----- mirR 23 123
-----AGTGCAATAGTATTGTCAAAGCATC----- mirR 25 91
-----AGTGCAATAGTATTGTCAA----- mirR 20 79
-----AGTGCAATAGTATTGTCAAAG----- mirR 21 53
-----GTGCAATAGTATTGTCAAAGCATC----- mirR 24 40
-----AGTGCAATAGTATTGTCAAAGCATCC----- mirR 26 33
-----GTGCAATAGTATTGTCAAAGC----- mirR 21 20
-----GCAGTGCAATAGTATTGTCAAAGCAT----- mirR 26 20
-----GTGCAATAGTATTGTCAA----- mirR 19 19
-----GTGCAATAGTATTGTCAAAG----- mirR 20 11
-----GTGCAATAGTATTGTCAAAGCA----- mirR 22 11
-----GCAGTGCAATAGTATTGTCAAAGC----- mirR 24 10
-----TGCAATAGTATTGTCAAAGCA----- mirR 21 9
-----GCAGTGCAATAGTATTGTCAAAGCA----- mirR 25 5
-----GCAGTGCAATAGTATTGTCAA----- mirR 22 5
-----GTGCAATAGTATTGTCAA----- mirR 18 5
-----TGCAATAGTATTGTCAAAGCAT----- mirR 22 5
-----GCAGTGCAATAGTATTGTCAA----- mirR 21 4
-----TGCAATAGTATTGTCAAAGCATCC----- mirR 24 3
-----GCAGTGCAATAGTATTGTCAAAG----- mirR 23 3
-----GCAGTGCAATAGTATTGTC----- mirR 19 3
-----TGCAATAGTATTGTCAAAGCATC----- mirR 23 3

```

```

-----TGCAATAGTATTGTCAAAGC----- mirR 20 2
-----TGCAATAGTATTGTCAA----- mirR 18 1
-----AGCAGTGCAATAGTATTGTCAA----- mirR 22 1
-----GAGCAGTGCAATAGTATTGTCAAAGCA----- mirR 27 1
-----TGCAATAGTATTGTCAAAGCATCCG----- mirR 25 1
-----CCGCGAGCAGGTTGCACACCTTTCTGGTTCTTGT morR 35 1
-----CGCGAGCAGGTTGCACAC----- morR 18 1
-----CATCCGCGAGCAGGTTGC----- morR 18 1
-----TCCGCGAGCAGGTTGCAC----- morR 18 1
-----CCGCGAGCAGGTTGCACACCTTTCC----- morR 25 1

```

>mmu-mir-337

| Species | len | reads |
|---------|-----|-------|
| morL    | 18  | 2     |
| morL    | 18  | 1     |
| morL    | 19  | 1     |
| morL    | 21  | 1     |
| morL    | 18  | 1     |
| morL    | 19  | 1     |
| morL    | 18  | 1     |
| mirL    | 22  | 5582  |
| mirL    | 21  | 4546  |
| mirL    | 21  | 2502  |
| mirL    | 19  | 2486  |
| mirL    | 20  | 2353  |
| mirL    | 22  | 1112  |
| mirL    | 23  | 1104  |
| mirL    | 18  | 593   |
| mirL    | 23  | 363   |
| mirL    | 24  | 230   |
| mirL    | 22  | 211   |
| mirL    | 21  | 193   |
| mirL    | 20  | 76    |
| mirL    | 19  | 69    |
| mirL    | 20  | 66    |
| mirL    | 19  | 51    |
| mirL    | 21  | 41    |
| mirL    | 24  | 35    |
| mirL    | 21  | 35    |
| mirL    | 20  | 35    |
| mirL    | 23  | 29    |
| mirL    | 18  | 28    |
| mirL    | 20  | 27    |
| mirL    | 23  | 22    |
| mirL    | 22  | 20    |
| mirL    | 18  | 16    |

```

-----GGCGTCATGCAGGAGTTGA----- mirL 19 13
-----GGCGTCATGCAGGAGTTGATTG----- mirL 22 11
-----AACGGCGTCATGCAGGAGT----- mirL 19 7
-----GGCGTCATGCAGGAGTTGATTGCA----- mirL 24 5
-----ACGGCGTCATGCAGGAGTTGATT----- mirL 23 4
-----GCGTCATGCAGGAGTTGAT----- mirL 19 3
-----ACGGCGTCATGCAGGAGT----- mirL 18 2
-----AACGGCGTCATGCAGGAGTTGATT----- mirL 24 2
-----ACGGCGTCATGCAGGAGTTGATTG----- mirL 24 1
-----CGTCATGCAGGAGTTGATTG----- mirL 20 1
-----GCGTCATGCAGGAGTTGA----- mirL 18 1
-----CGTCATGCAGGAGTTGAT----- mirL 18 1
-----GCGTCATGCAGGAGTTGATTG----- mirL 21 1
-----CGTCATGCAGGAGTTGATTGCAC----- mirL 23 1
-----AACGGCGTCATGCAGGAG----- mirL 18 1
-----TCAGCTCCTATATGATGCCTTT----- mirR 22 27072
-----TCAGCTCCTATATGATGCCTTTC----- mirR 23 12428
-----TTCAGCTCCTATATGATGCCT----- mirR 21 8242
-----TTCAGCTCCTATATGATGCCTTT----- mirR 23 3682
-----TTCAGCTCCTATATGATGCCTT----- mirR 22 3534
-----TCAGCTCCTATATGATGCC----- mirR 19 1728
-----TCAGCTCCTATATGATGCCT----- mirR 20 1606
-----TCAGCTCCTATATGATGCCTT----- mirR 21 1600
-----TCAGCTCCTATATGATGC----- mirR 18 1244
-----CAGCTCCTATATGATGCCTTT----- mirR 21 831
-----TTCAGCTCCTATATGATGCC----- mirR 20 770
-----TTCAGCTCCTATATGATGCCTTTC----- mirR 24 693
-----AGCTCCTATATGATGCCTTTC----- mirR 21 636
-----AGCTCCTATATGATGCCTTT----- mirR 20 599
-----TTCAGCTCCTATATGATGC----- mirR 19 475
-----AGCTCCTATATGATGCCTTTCT----- mirR 22 441
-----TCAGCTCCTATATGATGCCTTTCT----- mirR 24 408
-----GCTCCTATATGATGCCTTT----- mirR 19 196
-----AGCTCCTATATGATGCCT----- mirR 18 150
-----TTCAGCTCCTATATGATG----- mirR 18 150
-----CAGCTCCTATATGATGCCTTTC----- mirR 22 125
-----CAGCTCCTATATGATGCCT----- mirR 19 94
-----AGCTCCTATATGATGCCTTTCTT----- mirR 23 84
-----AGCTCCTATATGATGCCTT----- mirR 19 68
-----CAGCTCCTATATGATGCCTT----- mirR 20 50
-----AGCTCCTATATGATGCCTTTCTTCT----- mirR 24 46
-----GCTCCTATATGATGCCTT----- mirR 18 31
-----CAGCTCCTATATGATGCC----- mirR 18 22
-----CAGCTCCTATATGATGCCTTTCT----- mirR 23 12
-----GCTCCTATATGATGCCTTTC----- mirR 20 11
-----ATTCAGCTCCTATATGATGCCT----- mirR 22 9

```



```

-----GCTCCTATATGATGCCTTTCTTC----- mirR 23 4
-----ATTCAGCTCCTATATGATGCCTTT----- mirR 24 3
-----CAGCTCCTATATGATGCCTTTCTTC----- mirR 25 2
-----CATTAGCTCCTATATGATGCCTTTCTTC----- mirR 26 2
-----ATTCAGCTCCTATATGATGC----- mirR 20 1
-----ATTCAGCTCCTATATGATG----- mirR 19 1
-----ATTCAGCTCCTATATGATGCCTT----- mirR 23 1
-----TCTTCACCCCTTCAACC--- morR 18 1
-----TTCACCCCTTCAACCGG morR 19 1

>mmu-mir-667
CCCTTTCCATCTAGTGGGTACTGGCCTCGGTGCTGGTGGAGCAGTGAGCACGCCATACATTATATCTGTGACACCTGCCACCCAGCCCAAGGCCCTAGGCCACAAACTT species len reads
-----TCTAGTGGGTACTGGCCT----- morL 18 2
CCCTTTCCATCTAGTGGGTACTGGCCT----- morL 27 1
-----CGGTGCTGGTGGAGCAGTGAGC----- mirL 22 240
-----CGGTGCTGGTGGAGCAGTGAGCAC----- mirL 24 162
-----CGGTGCTGGTGGAGCAGTGAG----- mirL 21 125
-----CGGTGCTGGTGGAGCAGTGAGCA----- mirL 23 57
-----CGGTGCTGGTGGAGCAGTGA----- mirL 20 50
-----CGGTGCTGGTGGAGCAGTGAGCACG----- mirL 25 32
-----CGGTGCTGGTGGAGCAGTGAGCACGC----- mirL 26 24
-----GGTGCTGGTGGAGCAGTGAGCAC----- mirL 23 14
-----TCGGTGCTGGTGGAGCAGTGAGC----- mirL 23 8
-----GGTGCTGGTGGAGCAGTGAGC----- mirL 21 5
-----GGTGCTGGTGGAGCAGTGAGCA----- mirL 22 3
-----GGTGCTGGTGGAGCAGTGAGCACGC----- mirL 25 2
-----TCGGTGCTGGTGGAGCAGTGAG----- mirL 22 2
-----GGTGCTGGTGGAGCAGTGAG----- mirL 20 2
-----TCGGTGCTGGTGGAGCAGTGA----- mirL 21 1
-----GTGCTGGTGGAGCAGTGAGC----- mirL 20 1
-----CCTCGGTGCTGGTGGAGC----- mirL 18 1
-----GGTGCTGGTGGAGCAGTGAGCACG----- mirL 24 1
-----GCCATACATTATATCTGTGA----- loop 20 2
-----TGACACCTGCCACCCAGCCCAA----- mirR 22 33042
-----TGACACCTGCCACCCAGCCCAAG----- mirR 23 18575
-----TGACACCTGCCACCCAGCCC----- mirR 20 7582
-----TGACACCTGCCACCCAGCCCA----- mirR 21 6988
-----TGACACCTGCCACCCAGCC----- mirR 19 4578
-----GACACCTGCCACCCAGCCCAA----- mirR 21 4161
-----TGACACCTGCCACCCAGCCCAAGG----- mirR 24 4084
-----GACACCTGCCACCCAGCCCAAG----- mirR 22 2841
-----TGACACCTGCCACCCAGC----- mirR 18 2113
-----GACACCTGCCACCCAGCCCA----- mirR 20 966
-----GACACCTGCCACCCAGCCC----- mirR 19 754
-----GACACCTGCCACCCAGCCCAAGG----- mirR 23 684
-----GACACCTGCCACCCAGCC----- mirR 18 546

```

```

-----GACACCTGCCACCCAGCCCAAGGC----- mirR 24 230
-----ACACCTGCCACCCAGCCCAA----- mirR 20 121
-----ACACCTGCCACCCAGCCCAAG----- mirR 21 88
-----ACACCTGCCACCCAGCCCA----- mirR 19 54
-----ACACCTGCCACCCAGCCCAAGGC----- mirR 23 32
-----ACACCTGCCACCCAGCCC----- mirR 18 24
-----GTGACACCTGCCACCCAGCCCAA----- mirR 23 23
-----ACACCTGCCACCCAGCCCAAG----- mirR 22 17
-----ACACCTGCCACCCAGCCCAAGGC----- mirR 24 9
-----GTGACACCTGCCACCCAGCCCA----- mirR 22 7
-----GTGACACCTGCCACCCAGCCCAAG----- mirR 24 7
-----GTGACACCTGCCACCCAGCCC----- mirR 21 5
-----CACCTGCCACCCAGCCCAAGGC----- mirR 22 3
-----GTGACACCTGCCACCCAGCCC----- mirR 20 3
-----CTGTGACACCTGCCACCC----- mirR 18 3
-----TGTGACACCTGCCACCCAGCCC----- mirR 22 3
-----TGTGACACCTGCCACCCAGCCCAA----- mirR 24 2
-----CTGTGACACCTGCCACCCAG----- mirR 20 2
-----CACCTGCCACCCAGCCCAAG----- mirR 20 2
-----GTGACACCTGCCACCCAGC----- mirR 19 2
-----CACCTGCCACCCAGCCCA----- mirR 18 2
-----GTGACACCTGCCACCCAG----- mirR 18 2
-----TGTGACACCTGCCACCCA----- mirR 18 1
-----CTGTGACACCTGCCACCCA----- mirR 19 1
-----CACCTGCCACCCAGCCCAA----- mirR 19 1
-----CTGTGACACCTGCCACCCAGCC----- mirR 22 1
-----GGCCCCTAGGCCACAAA--- morR 18 2
-----CCCTAGGCCACAAACTT morR 18 1
-----GGCCCCTAGGCCACAAACT- morR 20 1

```

>mmu-mir-143

```

GCCTGTCTCCAGCCTGAGGTGCAGTGTGCATCTCTGGTCAGTTGGGAGTCTGAGATGAAGCACTGTAGCTCAGGAAGGGAGAAGATGTCCTG species len reads
GCCTGTCTCCAGCCTGA----- morL 18 1
--CTGTCTCCAGCCTGAG----- morL 18 1
-CCTGTCTCCAGCCTGAG----- morL 18 1
-----GGTGCAGTGTGCATCTCTGG----- mirL 21 22
-----GGTGCAGTGTGCATCTCTGGTC----- mirL 23 7
-----GGTGCAGTGTGCATCTCTGGTCA----- mirL 24 5
-----GGTGCAGTGTGCATCTCT----- mirL 19 5
-----TGAGGTGCAGTGTGCATCTC----- mirL 21 2
-----AGGTGCAGTGTGCATCTCTGG----- mirL 22 2
-----AGGTGCAGTGTGCATCT----- mirL 18 2
-----GGTGCAGTGTGCATCTCTGGT----- mirL 22 2
-----GTGCAGTGTGCATCTCTGGTC----- mirL 22 1
-----GGTGCAGTGTGCATCTC----- mirL 18 1
-----GGTGCAGTGTGCATCTCTG----- mirL 20 1

```

```

-----GCAGTGCTGCATCTCTGG----- mirL 18 1
-----AGGTGCAGTGCTGCATCTCTGGTC----- mirL 24 1
-----TGGTCAGTTGGGAGTCTGA----- loop 19 1
-----TGAGATGAAGCACTGTAGCTCA----- mirR 22 42624
-----TGAGATGAAGCACTGTAGCTC----- mirR 21 16460
-----TGAGATGAAGCACTGTAGCTCAG----- mirR 23 9188
-----TGAGATGAAGCACTGTAGCT----- mirR 20 6461
-----TGAGATGAAGCACTGTAGC----- mirR 19 4577
-----TGAGATGAAGCACTGTAGCTCAGG----- mirR 24 1931
-----TGAGATGAAGCACTGTAG----- mirR 18 1839
-----GAGATGAAGCACTGTAGCTCA----- mirR 21 1751
-----GAGATGAAGCACTGTAGCTC----- mirR 20 594
-----GAGATGAAGCACTGTAGCTCAG----- mirR 22 477
-----GAGATGAAGCACTGTAGCT----- mirR 19 209
-----CTGAGATGAAGCACTGTAGCTC----- mirR 22 111
-----GAGATGAAGCACTGTAGCTCAGG----- mirR 23 97
-----CTGAGATGAAGCACTGTAGCTCA----- mirR 23 90
-----GAGATGAAGCACTGTAGC----- mirR 18 73
-----GATGAAGCACTGTAGCTCA----- mirR 19 64
-----GATGAAGCACTGTAGCTC----- mirR 18 45
-----AGATGAAGCACTGTAGCTCA----- mirR 20 33
-----CTGAGATGAAGCACTGTAGC----- mirR 20 26
-----CTGAGATGAAGCACTGTAGCT----- mirR 21 24
-----GATGAAGCACTGTAGCTCAGGAA----- mirR 23 23
-----CTGAGATGAAGCACTGTA----- mirR 18 18
-----CTGAGATGAAGCACTGTAGCTCAG----- mirR 24 16
-----GAGATGAAGCACTGTAGCTCAGGA----- mirR 24 15
-----CTGAGATGAAGCACTGTAG----- mirR 19 14
-----AGATGAAGCACTGTAGCTC----- mirR 19 13
-----GATGAAGCACTGTAGCTCAGGA----- mirR 22 10
-----GATGAAGCACTGTAGCTCAG----- mirR 20 10
-----AGATGAAGCACTGTAGCTCAG----- mirR 21 6
-----TCTGAGATGAAGCACTGT----- mirR 18 3
-----AGATGAAGCACTGTAGCT----- mirR 18 2
-----TCTGAGATGAAGCACTGTAGCTCAG----- mirR 25 1
-----TCTGAGATGAAGCACTGTAGCTC----- mirR 23 1
-----GATGAAGCACTGTAGCTCAGGAAG----- mirR 24 1
-----AAGGGAGAAGATGTCTCTG morR 18 4
-----TCAGGAAGGGAGAAGATG----- morR 18 1

>mmu-mir-221
GCTGAACATCCAGGTCTGGGGCATGAACCTGGCATAACAATGTAGATTTCTGTGTTTGTAGGCAACAGCTACATTGTCTGCTGGGTTTCAG species len reads
-----ATCCAGGTCTGGGGCATGA----- morL 19 2
-CTGAACATCCAGGTCTGGGGCATGA----- morL 25 2
-----CAGGTCTGGGGCATGAAC----- morL 18 1
---GAACATCCAGGTCTGGGGCATG----- morL 22 1

```

```

GCTGAACATCCAGGTCTGGGGCATGA----- morL 26 1
---GAACATCCAGGTCTGGGGCATGA----- morL 23 1
----AACATCCAGGTCTGGGGCA----- morL 19 1
-----ACCTGGCATAACAATGTAGATTT----- mirL 22 1961
-----ACCTGGCATAACAATGTAGATTTTC----- mirL 23 1665
-----ACCTGGCATAACAATGTAGATT----- mirL 21 963
-----ACCTGGCATAACAATGTAGAT----- mirL 20 753
-----ACCTGGCATAACAATGTAG----- mirL 18 293
-----ACCTGGCATAACAATGTAGA----- mirL 19 275
-----ACCTGGCATAACAATGTAGATTTCTGT----- mirL 26 265
-----AACCTGGCATAACAATGTAGATTT----- mirL 23 26
-----AACCTGGCATAACAATGTAGAT----- mirL 21 19
-----AACCTGGCATAACAATGTAGATTTTC----- mirL 24 17
-----AACCTGGCATAACAATGTAGATT----- mirL 22 12
-----CCTGGCATAACAATGTAGATTT----- mirL 21 9
-----CCTGGCATAACAATGTAGATT----- mirL 20 9
-----AACCTGGCATAACAATGTAGA----- mirL 20 7
-----CCTGGCATAACAATGTAGAT----- mirL 19 6
-----TGGCATAACAATGTAGATT----- mirL 18 6
-----CTGGCATAACAATGTAGATTT----- mirL 20 5
-----CTGGCATAACAATGTAGATT----- mirL 19 5
-----TGGCATAACAATGTAGATTT----- mirL 19 5
-----CTGGCATAACAATGTAGAT----- mirL 18 5
-----AACCTGGCATAACAATGTAGATTTCTGT----- mirL 27 4
-----AACCTGGCATAACAATGTAG----- mirL 19 4
-----CTGGCATAACAATGTAGATTTTC----- mirL 21 1
-----GAACCTGGCATAACAATGT----- mirL 18 1
-----TGGCATAACAATGTAGATTTCT----- mirL 21 1
-----TCTGTGTTTGTTAGGCAA----- loop 18 8
-----TTTCTGTGTTTGTTAGGCAA----- loop 20 3
-----TTCTGTGTTTGTTAGGCAA----- loop 19 2
-----TGTGTTTGTTAGGCAACAG----- loop 19 1
-----TTCTGTGTTTGTTAGGCAACA----- loop 21 1
-----GTGTTTGTTAGGCAACAG----- loop 18 1
-----AGCTACATTGTCTGCTGGGTTTC-- mirR 23 38560
-----AGCTACATTGTCTGCTGGGTTT-- mirR 22 14729
-----AGCTACATTGTCTGCTGGGTT-- mirR 21 7713
-----AGCTACATTGTCTGCTGGGT-- mirR 20 7435
-----AGCTACATTGTCTGCTGGGTTTCA- mirR 24 5027
-----AGCTACATTGTCTGCTGGG----- mirR 19 4092
-----AGCTACATTGTCTGCTGG----- mirR 18 2406
-----GCTACATTGTCTGCTGGGTTTC-- mirR 22 69
-----GCTACATTGTCTGCTGGGTTT-- mirR 21 65
-----TACATTGTCTGCTGGGTTT-- mirR 19 48
-----CTACATTGTCTGCTGGGTTT-- mirR 20 39
-----TACATTGTCTGCTGGGTTTC-- mirR 20 36

```

```

-----CTACATTGTCTGCTGGGTTTC-- mirR 21 32
-----CAGCTACATTGTCTGCTGGGTTTC-- mirR 24 24
-----GCTACATTGTCTGCTGGGTT---- mirR 20 10
-----GCTACATTGTCTGCTGGGTT---- mirR 19 10
-----TACATTGTCTGCTGGGTTTCA- mirR 21 9
-----CAGCTACATTGTCTGCTGGGTTT-- mirR 23 7
-----GCTACATTGTCTGCTGGGTTTCA- mirR 23 5
-----CTACATTGTCTGCTGGGTT---- mirR 18 5
-----CAGCTACATTGTCTGCTGG---- mirR 19 5
-----GCTACATTGTCTGCTGGG---- mirR 18 4
-----TACATTGTCTGCTGGGTT---- mirR 18 4
-----CTACATTGTCTGCTGGGTTTCA- mirR 22 4
-----ACAGCTACATTGTCTGCTGGGTTTC-- mirR 25 3
-----CAGCTACATTGTCTGCTGGGTT-- mirR 22 3
-----GCTACATTGTCTGCTGGGTTTCA- mirR 24 1
-----CAGCTACATTGTCTGCTGGG---- mirR 20 1
-----ACAGCTACATTGTCTGCTGG---- mirR 20 1
-----CAGCTACATTGTCTGCTG---- mirR 18 1

```

>mmu-mir-151

| Sequence                                                                                            | Species | Len | Reads |
|-----------------------------------------------------------------------------------------------------|---------|-----|-------|
| TGATGGAGCGCTTTCCTGCCCTCGAGGAGCTCACAGTCTAGTATGTCTCCTCCCTACTAGACTGAGGCTCCTTGAGGACAGGGATCGTCATACTCACCT | morL    | 18  | 2     |
| ---TGGAGCGCTTTCCTGCC---                                                                             | morL    | 19  | 2     |
| ----GAGCGCTTTCCTGCCCTCG----                                                                         | morL    | 21  | 1     |
| TGATGGAGCGCTTTCCTGCC---                                                                             | morL    | 19  | 1     |
| --ATGGAGCGCTTTCCTGCC---                                                                             | morL    | 18  | 1     |
| --ATGGAGCGCTTTCCTGCC---                                                                             | mirL    | 21  | 26048 |
| -----TCGAGGAGCTCACAGTCTAGT-----                                                                     | mirL    | 22  | 20995 |
| -----TCGAGGAGCTCACAGTCTAGTA-----                                                                    | mirL    | 23  | 13340 |
| -----TCGAGGAGCTCACAGTCTAGTAT-----                                                                   | mirL    | 20  | 8641  |
| -----TCGAGGAGCTCACAGTCTAG-----                                                                      | mirL    | 19  | 3361  |
| -----TCGAGGAGCTCACAGTCTAGTATG-----                                                                  | mirL    | 24  | 1164  |
| -----TCGAGGAGCTCACAGTCT-----                                                                        | mirL    | 18  | 743   |
| -----CGAGGAGCTCACAGTCTAGT-----                                                                      | mirL    | 20  | 479   |
| -----CGAGGAGCTCACAGTCTAGTA-----                                                                     | mirL    | 21  | 468   |
| -----CTCGAGGAGCTCACAGTCTAGT-----                                                                    | mirL    | 22  | 317   |
| -----CGAGGAGCTCACAGTCTAGTAT-----                                                                    | mirL    | 22  | 306   |
| -----CGAGGAGCTCACAGTCTAG-----                                                                       | mirL    | 19  | 215   |
| -----CTCGAGGAGCTCACAGTCTAGTA-----                                                                   | mirL    | 23  | 146   |
| -----CTCGAGGAGCTCACAGTCTAG-----                                                                     | mirL    | 21  | 63    |
| -----CTCGAGGAGCTCACAGTCT-----                                                                       | mirL    | 18  | 59    |
| -----CGAGGAGCTCACAGTCTA-----                                                                        | mirL    | 18  | 50    |
| -----CGAGGAGCTCACAGTCTAGTATG-----                                                                   | mirL    | 23  | 45    |
| -----CTCGAGGAGCTCACAGTCTAGTAT-----                                                                  | mirL    | 24  | 42    |
| -----CTCGAGGAGCTCACAGTCTA-----                                                                      | mirL    | 20  | 32    |
| -----AGGAGCTCACAGTCTAGTA-----                                                                       | mirL    | 19  | 23    |

```

-----CTCGAGGAGCTCACAGTCTAGTATG----- mirL 25 22
-----GAGGAGCTCACAGTCTAGTA----- mirL 20 21
-----GAGGAGCTCACAGTCTAG----- mirL 18 16
-----AGGAGCTCACAGTCTAGT----- mirL 18 15
-----CCTCGAGGAGCTCACAGTCTAG----- mirL 22 12
-----GAGGAGCTCACAGTCTAGTAT----- mirL 21 7
-----GAGGAGCTCACAGTCTAGT----- mirL 19 6
-----CCTCGAGGAGCTCACAGTCTAGT----- mirL 23 6
-----CCCTCGAGGAGCTCACAGTCTA----- mirL 22 5
-----CGAGGAGCTCACAGTCTAGTATGT----- mirL 24 5
-----AGGAGCTCACAGTCTAGTAT----- mirL 20 5
-----CCTCGAGGAGCTCACAGTCTAGTA----- mirL 24 4
-----CCTCGAGGAGCTCACAGTC----- mirL 19 4
-----GAGGAGCTCACAGTCTAGTATG----- mirL 22 3
-----CCCTCGAGGAGCTCACAGTC----- mirL 20 2
-----CCTCGAGGAGCTCACAGTCTA----- mirL 21 2
-----CCTCGAGGAGCTCACAGTCTAGTAT----- mirL 25 2
-----AGGAGCTCACAGTCTAGTATGTC----- mirL 23 1
-----CCCTCGAGGAGCTCACAGTCTAGT----- mirL 24 1
-----CCCTCGAGGAGCTCACAGTCTAG----- mirL 23 1
-----CTAGACTGAGGCTCCTTGAGGAC----- mirR 23 2551
-----CTAGACTGAGGCTCCTTGA----- mirR 19 1374
-----CTAGACTGAGGCTCCTTGAGGA----- mirR 22 1173
-----CTAGACTGAGGCTCCTTGAGGACA----- mirR 24 1022
-----CTAGACTGAGGCTCCTTGAGG----- mirR 21 1002
-----CTAGACTGAGGCTCCTTGAG----- mirR 20 951
-----CTAGACTGAGGCTCCTTG----- mirR 18 252
-----ACTAGACTGAGGCTCCTTGA----- mirR 20 197
-----ACTAGACTGAGGCTCCTTGAG----- mirR 21 135
-----ACTAGACTGAGGCTCCTTGAGG----- mirR 22 64
-----ACTAGACTGAGGCTCCTTG----- mirR 19 49
-----ACTAGACTGAGGCTCCTTGAGGA----- mirR 23 46
-----TACTAGACTGAGGCTCCTTGA----- mirR 21 40
-----ACTAGACTGAGGCTCCTT----- mirR 18 38
-----TACTAGACTGAGGCTCCTTGAG----- mirR 22 31
-----TAGACTGAGGCTCCTTGAGGAC----- mirR 22 29
-----AGACTGAGGCTCCTTGAGGACA----- mirR 22 21
-----TAGACTGAGGCTCCTTGAGGA----- mirR 21 20
-----ACTAGACTGAGGCTCCTTGAGGAC----- mirR 24 19
-----AGACTGAGGCTCCTTGAGGAC----- mirR 21 17
-----TAGACTGAGGCTCCTTGAGGACA----- mirR 23 15
-----TAGACTGAGGCTCCTTGA----- mirR 18 15
-----AGACTGAGGCTCCTTGAG----- mirR 18 8
-----AGACTGAGGCTCCTTGAGGA----- mirR 20 7
-----TACTAGACTGAGGCTCCTTGAGG----- mirR 23 7
-----TAGACTGAGGCTCCTTGAG----- mirR 19 6

```

```

-----TAGACTGAGGCTCCTTGAGG----- mirR 20 5
-----AGACTGAGGCTCCTTGAGG----- mirR 19 4
-----GACTGAGGCTCCTTGAGG----- mirR 18 3
-----AGACTGAGGCTCCTTGAGGACAG----- mirR 23 2
-----GACTGAGGCTCCTTGAGGAC----- mirR 20 2
-----TAGACTGAGGCTCCTTGAGGACAG----- mirR 24 2
-----TACTAGACTGAGGCTCCTTGAGGAC----- mirR 25 2
-----TACTAGACTGAGGCTCCTTG----- mirR 20 1
-----TACTAGACTGAGGCTCCT----- mirR 18 1
-----AGACTGAGGCTCCTTGAGGACAGG----- mirR 24 1
-----CAGGGATCGTCATACTCA--- morR 18 1
-----AGGGATCGTCATACTCACC- morR 19 1
-----GGGATCGTCATACTCACCT morR 19 1
-----ACAGGGATCGTCATACTC---- morR 18 1

```

>mmu-mir-330

| Sequence                                                                                             | species | len | reads |
|------------------------------------------------------------------------------------------------------|---------|-----|-------|
| CCTTTGGCGATCTCTGCCTCTCTGGGCCTGTGTCTTAGGCTCTTCAAGATCCAACGAGCAAAGCACAGGGCCTGCAGAGAGGTAGCGCTCTGCTCCTTAC | morL    | 18  | 2     |
| ---TTGGCGATCTCTGCCTCT-----                                                                           | morL    | 18  | 1     |
| CCTTTGGCGATCTCTGCC-----                                                                              | morL    | 19  | 1     |
| CCTTTGGCGATCTCTGCCT-----                                                                             | mirL    | 20  | 3024  |
| -----TCTCTGGGCCTGTGTCTTAG-----                                                                       | mirL    | 22  | 1412  |
| -----TCTCTGGGCCTGTGTCTTAGGC-----                                                                     | mirL    | 23  | 1050  |
| -----TCTCTGGGCCTGTGTCTTAGGCT-----                                                                    | mirL    | 19  | 994   |
| -----TCTCTGGGCCTGTGTCTTAGGCTC-----                                                                   | mirL    | 24  | 887   |
| -----TCTCTGGGCCTGTGTCTTAGG-----                                                                      | mirL    | 21  | 599   |
| -----TCTCTGGGCCTGTGTCTTAGGCTCT-----                                                                  | mirL    | 25  | 185   |
| -----CTCTGGGCCTGTGTCTTAG-----                                                                        | mirL    | 19  | 99    |
| -----CTCTGGGCCTGTGTCTTAGGCTC-----                                                                    | mirL    | 23  | 81    |
| -----CTCTGGGCCTGTGTCTTAGGCT-----                                                                     | mirL    | 22  | 72    |
| -----CTCTGGGCCTGTGTCTTAG-----                                                                        | mirL    | 18  | 55    |
| -----CTCTGGGCCTGTGTCTTAGGC-----                                                                      | mirL    | 21  | 37    |
| -----CTCTGGGCCTGTGTCTTAGG-----                                                                       | mirL    | 20  | 26    |
| -----CTCTGGGCCTGTGTCTTAGGCTCT-----                                                                   | mirL    | 24  | 14    |
| -----TCTGGGCCTGTGTCTTAG-----                                                                         | mirL    | 18  | 8     |
| -----CTCTCTGGGCCTGTGTCTTAGGC-----                                                                    | mirL    | 23  | 2     |
| -----CTGGGCCTGTGTCTTAGGC-----                                                                        | mirL    | 19  | 2     |
| -----CCTCTCTGGGCCTGTGTC-----                                                                         | mirL    | 18  | 2     |
| -----CCTCTCTGGGCCTGTGTC-----                                                                         | mirL    | 19  | 1     |
| -----CTGGGCCTGTGTCTTAGG-----                                                                         | mirL    | 18  | 1     |
| -----GCCTCTCTGGGCCTGTGTCTTAG-----                                                                    | mirL    | 23  | 1     |
| -----TCTGGGCCTGTGTCTTAGGC-----                                                                       | mirL    | 20  | 1     |
| -----TCTGGGCCTGTGTCTTAGG-----                                                                        | mirL    | 19  | 1     |
| -----TCTTCAAGATCCAACGAG-----                                                                         | loop    | 18  | 2     |
| -----CTTCAAGATCCAACGAGCAA-----                                                                       | loop    | 20  | 1     |
| -----GGCTCTTCAAGATCCAAC-----                                                                         | loop    | 18  | 1     |

```

-----TCTTCAAGATCCAACGAGCAA----- loop 21 1
-----CTTCAAGATCCAACGAGCA----- loop 19 1
-----CAAAGCACAGGGCCTGCAGAGA----- mirR 22 12138
-----CAAAGCACAGGGCCTGCAGAGAG----- mirR 23 11564
-----GCAAAGCACAGGGCCTGCAGAGA----- mirR 23 10246
-----GCAAAGCACAGGGCCTGCAGAGAG----- mirR 24 9075
-----CAAAGCACAGGGCCTGCAGAG----- mirR 21 5477
-----GCAAAGCACAGGGCCTGCAGAG----- mirR 21 4795
-----GCAAAGCACAGGGCCTGCAGAG----- mirR 22 4631
-----CAAAGCACAGGGCCTGCAGAGAGG----- mirR 24 4021
-----CAAAGCACAGGGCCTGCAGAG----- mirR 20 3377
-----GCAAAGCACAGGGCCTGC----- mirR 18 3028
-----CAAAGCACAGGGCCTGCAGAGAGGT----- mirR 25 1903
-----GCAAAGCACAGGGCCTGCAGAGAGG----- mirR 25 1765
-----GCAAAGCACAGGGCCTGCAG----- mirR 20 1568
-----CAAAGCACAGGGCCTGCAG----- mirR 19 1477
-----AAAGCACAGGGCCTGCAGAGA----- mirR 21 51
-----AAAGCACAGGGCCTGCAGAGAG----- mirR 22 49
-----AAGCACAGGGCCTGCAGAGAG----- mirR 20 44
-----AGCACAGGGCCTGCAGAGAG----- mirR 20 39
-----AGCACAGGGCCTGCAGAGAG----- mirR 19 37
-----AAGCACAGGGCCTGCAGAGAG----- mirR 21 28
-----AGCACAGGGCCTGCAGAG----- mirR 18 19
-----AAGCACAGGGCCTGCAGAG----- mirR 19 19
-----AAAGCACAGGGCCTGCAGAG----- mirR 20 19
-----AAAGCACAGGGCCTGCAGAG----- mirR 19 17
-----AAGCACAGGGCCTGCAGAG----- mirR 18 14
-----AAAGCACAGGGCCTGCAGAGAGGT----- mirR 24 11
-----AGCAAAGCACAGGGCCTGCAGAGAG----- mirR 24 10
-----AAAGCACAGGGCCTGCAGAGAGG----- mirR 23 8
-----AAAGCACAGGGCCTGCAG----- mirR 18 8
-----AGCAAAGCACAGGGCCTGCAGAGAG----- mirR 25 6
-----AAGCACAGGGCCTGCAGAGAGG----- mirR 22 6
-----AGCAAAGCACAGGGCCTGCAGAG----- mirR 22 6
-----AGCAAAGCACAGGGCCTGCAGAG----- mirR 23 6
-----AGCACAGGGCCTGCAGAGAGG----- mirR 21 3
-----AAGCACAGGGCCTGCAGAGAGGT----- mirR 23 3
-----AGCAAAGCACAGGGCCTGC----- mirR 19 2
-----AGCAAAGCACAGGGCCTGCA----- mirR 20 1
-----AGCAAAGCACAGGGCCTGCAG----- mirR 21 1
-----AGCACAGGGCCTGCAGAGAGGT----- mirR 22 1
-----AGCACAGGGCCTGCAGAGAGGTAGC----- mirR 25 1
-----AGAGGTAGCGCTTGCTCC----- morR 19 1
-----AGGTAGCGCTTGCTCCT----- morR 18 1
-----AGGTAGCGCTTGCTCCTTAC----- morR 21 1

```



>mmu-mir-409

| GCCTCTCCGTGGTACTCGGAGAGAGGTTACCCGAGCAACTTTGCATCTGGAGGACGAATGTTGCTCGGTGAACCCCTTTTCGGTATCAAATCCCTCCA | species | len | reads |
|----------------------------------------------------------------------------------------------------|---------|-----|-------|
| GCCTCTCCGTGGTACTCGGAG-----                                                                         | morL    | 21  | 1     |
| ---TCTCCGTGGTACTCGGAG-----                                                                         | morL    | 18  | 1     |
| -----AGGTTACCCGAGCAACTTTGCAT-----                                                                  | mirL    | 23  | 6299  |
| -----AGGTTACCCGAGCAACTTTGC-----                                                                    | mirL    | 21  | 5361  |
| -----AGGTTACCCGAGCAACTTTGCATC-----                                                                 | mirL    | 24  | 3402  |
| -----AGGTTACCCGAGCAACTTTG-----                                                                     | mirL    | 20  | 1810  |
| -----AGGTTACCCGAGCAACTTTGCA-----                                                                   | mirL    | 22  | 945   |
| -----AGGTTACCCGAGCAACTTT-----                                                                      | mirL    | 19  | 564   |
| -----AGGTTACCCGAGCAACTTTGCATCT-----                                                                | mirL    | 25  | 454   |
| -----GGTTACCCGAGCAACTTTGCAT-----                                                                   | mirL    | 22  | 56    |
| -----GTTACCCGAGCAACTTTGCAT-----                                                                    | mirL    | 21  | 43    |
| -----GGTTACCCGAGCAACTTTG-----                                                                      | mirL    | 19  | 19    |
| -----GTTACCCGAGCAACTTTG-----                                                                       | mirL    | 18  | 13    |
| -----GAGGTTACCCGAGCAACTTTGCAT-----                                                                 | mirL    | 24  | 11    |
| -----GGTTACCCGAGCAACTTTGC-----                                                                     | mirL    | 20  | 10    |
| -----GGTTACCCGAGCAACTTT-----                                                                       | mirL    | 18  | 8     |
| -----GTTACCCGAGCAACTTTGCA-----                                                                     | mirL    | 20  | 7     |
| -----GTTACCCGAGCAACTTTGCATC-----                                                                   | mirL    | 22  | 6     |
| -----TTACCCGAGCAACTTTGCAT-----                                                                     | mirL    | 20  | 6     |
| -----GGTTACCCGAGCAACTTTGCATC-----                                                                  | mirL    | 23  | 6     |
| -----GAGGTTACCCGAGCAACTTTG-----                                                                    | mirL    | 21  | 3     |
| -----GTTACCCGAGCAACTTTGC-----                                                                      | mirL    | 19  | 3     |
| -----TTACCCGAGCAACTTTGCATC-----                                                                    | mirL    | 21  | 3     |
| -----GAGGTTACCCGAGCAACTTTGC-----                                                                   | mirL    | 22  | 2     |
| -----AGAGGTTACCCGAGCAACTT-----                                                                     | mirL    | 20  | 2     |
| -----TTACCCGAGCAACTTTGC-----                                                                       | mirL    | 18  | 2     |
| -----GAGAGGTTACCCGAGCAACTT-----                                                                    | mirL    | 21  | 1     |
| -----GGTTACCCGAGCAACTTTGCA-----                                                                    | mirL    | 21  | 1     |
| -----AGAGGTTACCCGAGCAAC-----                                                                       | mirL    | 18  | 1     |
| -----TTACCCGAGCAACTTTGCA-----                                                                      | mirL    | 19  | 1     |
| -----AGAGGTTACCCGAGCAACTTT-----                                                                    | mirL    | 21  | 1     |
| -----GGTTACCCGAGCAACTTTGCATCT-----                                                                 | mirL    | 24  | 1     |
| -----GAATGTTGCTCGGTGAACCCCT-----                                                                   | mirR    | 22  | 15119 |
| -----CGAATGTTGCTCGGTGAACCCCT-----                                                                  | mirR    | 23  | 10818 |
| -----GAATGTTGCTCGGTGAACCCCTT-----                                                                  | mirR    | 23  | 9412  |
| -----AATGTTGCTCGGTGAACCCCT-----                                                                    | mirR    | 21  | 9171  |
| -----CGAATGTTGCTCGGTGAACCCCTT-----                                                                 | mirR    | 24  | 4817  |
| -----AATGTTGCTCGGTGAACCCCT-----                                                                    | mirR    | 20  | 3503  |
| -----AATGTTGCTCGGTGAACCCCTT-----                                                                   | mirR    | 22  | 2759  |
| -----GAATGTTGCTCGGTGAACCCCT-----                                                                   | mirR    | 21  | 1609  |
| -----CGAATGTTGCTCGGTGAACCCCT-----                                                                  | mirR    | 22  | 1206  |
| -----GAATGTTGCTCGGTGAAC-----                                                                       | mirR    | 18  | 1155  |
| -----GAATGTTGCTCGGTGAACCCCTTT-----                                                                 | mirR    | 24  | 820   |
| -----AATGTTGCTCGGTGAACCCCT-----                                                                    | mirR    | 19  | 715   |

```

-----GAATGTTGCTCGGTGAACCC----- mirR 20 510
-----GAATGTTGCTCGGTGAACC----- mirR 19 324
-----ATGTTGCTCGGTGAACCCCT----- mirR 20 311
-----AATGTTGCTCGGTGAACCCCTTT----- mirR 23 275
-----CGAATGTTGCTCGGTGAACCC----- mirR 21 223
-----AATGTTGCTCGGTGAACC----- mirR 18 215
-----CGAATGTTGCTCGGTGAACCCCTTT----- mirR 25 186
-----CGAATGTTGCTCGGTGAAC----- mirR 19 175
-----ATGTTGCTCGGTGAACCCCTT----- mirR 21 171
-----TGTGCTCGGTGAACCCCT----- mirR 19 162
-----ATGTTGCTCGGTGAACCC----- mirR 19 108
-----CGAATGTTGCTCGGTGAACC----- mirR 20 97
-----TGTGCTCGGTGAACCCCTT----- mirR 20 96
-----AATGTTGCTCGGTGAACCCCTTT----- mirR 24 67
-----TGTGCTCGGTGAACCC----- mirR 18 54
-----TGTGCTCGGTGAACCCCTTT----- mirR 21 50
-----ACGAATGTTGCTCGGTGAACCCCT----- mirR 24 24
-----ATGTTGCTCGGTGAACCCCTTT----- mirR 22 18
-----TGTGCTCGGTGAACCCCTTTT----- mirR 22 13
-----ATGTTGCTCGGTGAACCC----- mirR 18 13
-----ATGTTGCTCGGTGAACCCCTTTT----- mirR 23 5
-----TGTGCTCGGTGAACCCCTTTTC----- mirR 23 4
-----ACGAATGTTGCTCGGTGAACC----- mirR 21 4
-----ACGAATGTTGCTCGGTGAACCC----- mirR 22 3
-----ACGAATGTTGCTCGGTGAAC----- mirR 20 3
-----ACGAATGTTGCTCGGTGAACCC----- mirR 23 3
-----ACGAATGTTGCTCGGTGAACCCCTT----- mirR 25 3
-----ATGTTGCTCGGTGAACCCCTTTTCGG----- mirR 26 1
-----GACGAATGTTGCTCGGTGAACCCCTT----- mirR 26 1
-----ACGAATGTTGCTCGGTGA----- mirR 18 1
-----CGGTATCAAATCCCTCCA morR 18 2
-----CCTTTTCGGTATCAAATCC----- morR 19 1
-----TCGGTATCAAATCCCTCCA morR 19 1

```

>mmu-mir-212

```

GCACCTTGGCTCTAGACTGCTTACTGCCCGGGCCGCCTTCAGTAACAGTCTCCAGTCACGGCCACCGACGCCTGGCCCCGCCCCAG species len reads
--ACCTTGGCTCTAGACTGCTTACT----- mirL 23 7127
--ACCTTGGCTCTAGACTGCTTAC----- mirL 22 4785
--ACCTTGGCTCTAGACTGCTTACTG----- mirL 24 2132
--ACCTTGGCTCTAGACTGCTTACTGC----- mirL 25 1642
--ACCTTGGCTCTAGACTGC----- mirL 18 1359
--ACCTTGGCTCTAGACTGCTTA----- mirL 21 814
--ACCTTGGCTCTAGACTGCT----- mirL 19 483
--CCTTGGCTCTAGACTGCTTACT----- mirL 22 91
--CCTTGGCTCTAGACTGCTTACTGC----- mirL 24 50
--CCTTGGCTCTAGACTGCTTACTG----- mirL 23 48

```

```

---CCTTGGCTCTAGACTGCTTAC----- mirL 21 32
---CCTTGGCTCTAGACTGCTTACTGCC----- mirL 25 28
---CCTTGGCTCTAGACTGCTTA----- mirL 20 9
---CCTTGGCTCTAGACTGCT----- mirL 18 6
GCACCTTGGCTCTAGACTG----- mirL 19 2
---CTTGGCTCTAGACTGCTTACTG----- mirL 22 1
-CACCTTGGCTCTAGACTG----- mirL 18 1
---CTTGGCTCTAGACTGCTTA----- mirL 19 1
-CACCTTGGCTCTAGACTGCTTAC----- mirL 23 1
GCACCTTGGCTCTAGACTGCTTACT----- mirL 25 1
-----TTGGCTCTAGACTGCTTACTGC----- mirL 22 1
---TTGGCTCTAGACTGCTTACT----- mirL 20 1
---CTTGGCTCTAGACTGCTTACT----- mirL 21 1
-CACCTTGGCTCTAGACTGCT----- mirL 20 1
-----TAACAGTCTCCAGTCACGGCCAC----- mirR 23 27129
-----TAACAGTCTCCAGTCACGGCCA----- mirR 22 10976
-----TAACAGTCTCCAGTCACGGCC----- mirR 21 7817
-----TAACAGTCTCCAGTCACGGCCACC----- mirR 24 4355
-----TAACAGTCTCCAGTCACGGCC----- mirR 20 3364
-----TAACAGTCTCCAGTCACGGCCACCG----- mirR 25 1921
-----TAACAGTCTCCAGTCACGG----- mirR 19 1438
-----AACAGTCTCCAGTCACGGCCAC----- mirR 22 1255
-----AACAGTCTCCAGTCACGGCCA----- mirR 21 755
-----GTAACAGTCTCCAGTCACGGCC----- mirR 22 440
-----GTAACAGTCTCCAGTCACGGCCAC----- mirR 24 300
-----GTAACAGTCTCCAGTCACGGCCA----- mirR 23 300
-----AACAGTCTCCAGTCACGGCC----- mirR 20 297
-----AACAGTCTCCAGTCACGGCCACC----- mirR 23 261
-----GTAACAGTCTCCAGTCACGGCCACC----- mirR 25 187
-----AACAGTCTCCAGTCACGGCCACCG----- mirR 24 128
-----GTAACAGTCTCCAGTCAC----- mirR 18 123
-----AACAGTCTCCAGTCACGGCC----- mirR 19 116
-----GTAACAGTCTCCAGTCACGGCC----- mirR 21 99
-----AACAGTCTCCAGTCACGG----- mirR 18 91
-----GTAACAGTCTCCAGTCACGG----- mirR 20 87
-----ACAGTCTCCAGTCACGGCCA----- mirR 20 81
-----CAGTCTCCAGTCACGGCCA----- mirR 19 55
-----ACAGTCTCCAGTCACGGCCAC----- mirR 21 37
-----ACAGTCTCCAGTCACGGCC----- mirR 19 31
-----CAGTCTCCAGTCACGGCC----- mirR 18 22
-----ACAGTCTCCAGTCACGGCC----- mirR 18 12
-----ACAGTCTCCAGTCACGGCCACCG----- mirR 23 5
-----CAGTCTCCAGTCACGGCCAC----- mirR 20 5
-----ACAGTCTCCAGTCACGGCCACC----- mirR 22 3
-----CAGTCTCCAGTCACGGCCACC----- mirR 21 1
-----AGTAACAGTCTCCAGTCACGGCC----- mirR 22 1

```

```
-----AGTAACAGTCTCCAGTCACGGCCAC----- mirR 25 1
-----CGCCTGGCCCCGCCCCAG morR 18 1
-----GACGCCTGGCCCCGCCCC-- morR 18 1

>mmu-mir-326
TCTGTCTGTTGGGCTGGGGCAGGGCCTTTGTGAAGGCGGGTTATGCTCAGATCGCCTCTGGGCCCTTCCTCCAGTCCCAGGAGATTACTTCGAGGCAAACTGC species len reads
--TGTCTGTTGGGCTGGGGG----- mirL 18 3
--GTCTGTTGGGCTGGGGG----- mirL 18 2
-CTGTCTGTTGGGCTGGGG----- mirL 19 2
-CTGTCTGTTGGGCTGGGG----- mirL 18 1
----TCTGTTGGGCTGGGGGCA----- mirL 18 1
TCTGTCTGTTGGGCTGGG----- mirL 18 1
-CTGTCTGTTGGGCTGGGGGCA----- mirL 21 1
--TGTCTGTTGGGCTGGGGG----- mirL 19 1
-----CCTCTGGGCCCTTCCTCCAGT----- mirR 21 26811
-----CCTCTGGGCCCTTCCTCCAGTC----- mirR 22 20351
-----CCTCTGGGCCCTTCCTCCAGTCC----- mirR 23 13891
-----CCTCTGGGCCCTTCCTCCAG----- mirR 20 8507
-----CCTCTGGGCCCTTCCTCCA----- mirR 19 4795
-----CCTCTGGGCCCTTCCTCC----- mirR 18 2531
-----CCTCTGGGCCCTTCCTCCAGTCCC----- mirR 24 1854
-----CTCTGGGCCCTTCCTCCAGTCC----- mirR 22 114
-----CTCTGGGCCCTTCCTCCAGTC----- mirR 21 86
-----TCTGGGCCCTTCCTCCAGTC----- mirR 20 40
-----CTCTGGGCCCTTCCTCCAGT----- mirR 20 33
-----CTCTGGGCCCTTCCTCCAG----- mirR 19 29
-----CTCTGGGCCCTTCCTCCAGTCCC----- mirR 23 25
-----TCTGGGCCCTTCCTCCAGTCC----- mirR 21 17
-----TCTGGGCCCTTCCTCCAGT----- mirR 19 13
-----CTCTGGGCCCTTCCTCCA----- mirR 18 12
-----GCCTCTGGGCCCTTCCTCCAGT----- mirR 22 12
-----GCCTCTGGGCCCTTCCTCCAGTCC----- mirR 24 10
-----GCCTCTGGGCCCTTCCTCCAGTC----- mirR 23 9
-----TCTGGGCCCTTCCTCCAG----- mirR 18 8
-----TCTGGGCCCTTCCTCCAGTCCC----- mirR 22 7
-----CTGGGCCCTTCCTCCAGT----- mirR 18 5
-----CTGGGCCCTTCCTCCAGTCC----- mirR 20 5
-----CTCTGGGCCCTTCCTCCAGTCCCG----- mirR 24 4
-----GCCTCTGGGCCCTTCCTCCA----- mirR 20 3
-----CGCCTCTGGGCCCTTCCT----- mirR 18 3
-----CTGGGCCCTTCCTCCAGTC----- mirR 19 2
-----TCTGGGCCCTTCCTCCAGTCCCG----- mirR 23 1
-----CTGGGCCCTTCCTCCAGTCCC----- mirR 21 1
-----TCCCGAGGAGATTACTTCGAGGCAAACTGC morR 33 1
-----TCCCGAGGAGATTACTTCGA----- morR 22 1
```

>mmu-mir-31

| Sequence                                                                                              | species | len | reads |
|-------------------------------------------------------------------------------------------------------|---------|-----|-------|
| TAACTCGGAAGTGGAGAGGAGGCAAGATGCTGGCATAGCTGTTGAACTGAGAACCTGCTATGCCAACATATTGCCATCTTTCCTGTCTGACAGCAGCTTGG | morL    | 19  | 2     |
| -AACTCGGAAGTGGAGAGGA-----                                                                             | morL    | 19  | 1     |
| TAACTCGGAAGTGGAGAGG-----                                                                              | morL    | 18  | 1     |
| TAACTCGGAAGTGGAGAG-----                                                                               | morL    | 18  | 1     |
| -----AGGCAAGATGCTGGCATAGCT-----                                                                       | mirL    | 21  | 19991 |
| -----AGGCAAGATGCTGGCATAGCTG-----                                                                      | mirL    | 22  | 14179 |
| -----AGGCAAGATGCTGGCATAGCTGT-----                                                                     | mirL    | 23  | 11611 |
| -----AGGCAAGATGCTGGCATAGC-----                                                                        | mirL    | 20  | 6191  |
| -----GGCAAGATGCTGGCATAGCTG-----                                                                       | mirL    | 21  | 2992  |
| -----AGGCAAGATGCTGGCATAG-----                                                                         | mirL    | 19  | 1437  |
| -----AGGCAAGATGCTGGCATAGCTGTT-----                                                                    | mirL    | 24  | 1417  |
| -----GGCAAGATGCTGGCATAGCTGT-----                                                                      | mirL    | 22  | 797   |
| -----AGGCAAGATGCTGGCATA-----                                                                          | mirL    | 18  | 558   |
| -----GGCAAGATGCTGGCATAGCT-----                                                                        | mirL    | 20  | 209   |
| -----GGCAAGATGCTGGCATAGC-----                                                                         | mirL    | 19  | 66    |
| -----GGCAAGATGCTGGCATAG-----                                                                          | mirL    | 18  | 57    |
| -----GCAAGATGCTGGCATAGCT-----                                                                         | mirL    | 19  | 45    |
| -----CAAGATGCTGGCATAGCT-----                                                                          | mirL    | 18  | 26    |
| -----GGCAAGATGCTGGCATAGCTGTT-----                                                                     | mirL    | 23  | 26    |
| -----CAAGATGCTGGCATAGCTG-----                                                                         | mirL    | 19  | 24    |
| -----GAGGCAAGATGCTGGCATAGCT-----                                                                      | mirL    | 22  | 21    |
| -----GCAAGATGCTGGCATAGCTG-----                                                                        | mirL    | 20  | 21    |
| -----GAGGCAAGATGCTGGCATAGCTG-----                                                                     | mirL    | 23  | 18    |
| -----GGCAAGATGCTGGCATAGCTGTTGAA-----                                                                  | mirL    | 27  | 10    |
| -----CAAGATGCTGGCATAGCTGT-----                                                                        | mirL    | 20  | 4     |
| -----GCAAGATGCTGGCATAGCTGT-----                                                                       | mirL    | 21  | 4     |
| -----GAGGCAAGATGCTGGCATAG-----                                                                        | mirL    | 20  | 2     |
| -----GGAGGCAAGATGCTGGCATAGCT-----                                                                     | mirL    | 23  | 1     |
| -----GCTGTTGAACTGAGAACC-----                                                                          | loop    | 18  | 1     |
| -----TGCTATGCCAACATATTGCCATC-----                                                                     | mirR    | 23  | 9707  |
| -----TGCTATGCCAACATATTGCCAT-----                                                                      | mirR    | 22  | 4878  |
| -----TGCTATGCCAACATATTGCCA-----                                                                       | mirR    | 21  | 1562  |
| -----GCTATGCCAACATATTGCCATC-----                                                                      | mirR    | 22  | 574   |
| -----TGCTATGCCAACATATTGCCATCT-----                                                                    | mirR    | 24  | 562   |
| -----TGCTATGCCAACATATTGCC-----                                                                        | mirR    | 20  | 562   |
| -----GCTATGCCAACATATTGCCAT-----                                                                       | mirR    | 21  | 262   |
| -----TGCTATGCCAACATATTGC-----                                                                         | mirR    | 19  | 222   |
| -----CTATGCCAACATATTGCCATC-----                                                                       | mirR    | 21  | 114   |
| -----TATGCCAACATATTGCCATCT-----                                                                       | mirR    | 21  | 80    |
| -----TATGCCAACATATTGCCATC-----                                                                        | mirR    | 20  | 70    |
| -----GCTATGCCAACATATTGCCA-----                                                                        | mirR    | 20  | 62    |
| -----TGCTATGCCAACATATTG-----                                                                          | mirR    | 18  | 58    |
| -----CTATGCCAACATATTGCCAT-----                                                                        | mirR    | 20  | 53    |
| -----TATGCCAACATATTGCCAT-----                                                                         | mirR    | 19  | 43    |
| -----CTATGCCAACATATTGCCATCT-----                                                                      | mirR    | 22  | 40    |

```

-----GCTATGCCAACATATTGCCATCT----- mirR 23 33
-----CTATGCCAACATATTGCCA----- mirR 19 16
-----GCTATGCCAACATATTGCC----- mirR 19 15
-----TATGCCAACATATTGCCA----- mirR 18 15
-----GCTATGCCAACATATTGCCATCTT----- mirR 24 7
-----CCTGCTATGCCAACATATTGCCATC----- mirR 25 6
-----CTGCTATGCCAACATATTGCCATC----- mirR 24 4
-----CTGCTATGCCAACATATTGCCAT----- mirR 23 3
-----CTGCTATGCCAACATATTGCCA----- mirR 22 3
-----TATGCCAACATATTGCCATCTT----- mirR 22 2
-----GCTATGCCAACATATTGC----- mirR 18 2
-----CTATGCCAACATATTGCCATCTT----- mirR 23 2
-----CCTGCTATGCCAACATATTGCCAT----- mirR 24 1
-----CCTGTCTGACAGCAGCTTG----- morR 19 1
-----TCTTTCCTGTCTGACAGC----- morR 18 1
-----CTTTCCTGTCTGACAGCAGC----- morR 20 1
-----TTCCTGTCTGACAGCAGCTTGG morR 22 1
-----TCTTTCCTGTCTGACAGCAG----- morR 20 1
-----TTCCTGTCTGACAGCAGC----- morR 18 1

>mmu-mir-365-2
GATCAAGGACAGCAAGAAAAATGAGGGACTTTCAGGGGCAGCTGTGTTTCTGACTCAGTCATAATGCCCTAAAAATCCTTATTGTTCTTGACAGTGTGCATC species len reads
--TCAAGGACAGCAAGAAAA-- morL 19 2
GATCAAGGACAGCAAGAAAAATGA morL 24 1
-----AGGGACTTTCAGGGGCAGCTGT----- mirL 22 86
-----AGGGACTTTCAGGGGCAGCTG----- mirL 21 38
-----AGGGACTTTCAGGGGCAGCTGTG----- mirL 23 30
-----AGGGACTTTCAGGGGCAGCT----- mirL 20 15
-----AGGGACTTTCAGGGGCAGC----- mirL 19 9
-----GACTTTCAGGGGCAGCTGT----- mirL 19 8
-----GGACTTTCAGGGGCAGCTGT----- mirL 20 3
-----GGGACTTTCAGGGGCAGCTGT----- mirL 21 3
-----AGGGACTTTCAGGGGCAGCTGTGTTT----- mirL 27 3
-----GGGACTTTCAGGGGCAGCTGTGT----- mirL 23 2
-----GGACTTTCAGGGGCAGCTG----- mirL 19 2
-----AGGGACTTTCAGGGGCAGCTGTGT----- mirL 24 2
-----GGGACTTTCAGGGGCAGCTGTG----- mirL 22 2
-----GGGACTTTCAGGGGCAGCT----- mirL 19 2
-----GGGACTTTCAGGGGCAGC----- mirL 18 1
-----GAGGGACTTTCAGGGGCAGCT----- mirL 21 1
-----GAGGGACTTTCAGGGGCA----- mirL 18 1
-----GACTTTCAGGGGCAGCTGTG----- mirL 20 1
-----GACTTTCAGGGGCAGCTG----- mirL 18 1
-----GGGACTTTCAGGGGCAGCTG----- mirL 20 1
-----GGACTTTCAGGGGCAGCTGTG----- mirL 21 1
-----GTGTTTCTGACTCAGTC----- loop 18 2

```

```

-----TAATGCCCTAAAAATCCTTAT----- mirR 22 62700
-----TAATGCCCTAAAAATCCTTA----- mirR 21 5432
-----AATGCCCTAAAAATCCTTAT----- mirR 21 4281
-----TAATGCCCTAAAAATCC----- mirR 18 1961
-----TAATGCCCTAAAAATCCTT----- mirR 20 744
-----TAATGCCCTAAAAATCCTTATT----- mirR 23 743
-----AATGCCCTAAAAATCCTTA----- mirR 20 408
-----TAATGCCCTAAAAATCCT----- mirR 19 400
-----AATGCCCTAAAAATCCTTATT----- mirR 22 119
-----TAATGCCCTAAAAATCCTTATTG----- mirR 24 107
-----ATGCCCTAAAAATCCTTAT----- mirR 20 81
-----AATGCCCTAAAAATCCTT----- mirR 19 63
-----TGCCCTAAAAATCCTTAT----- mirR 19 38
-----AATGCCCTAAAAATCCT----- mirR 18 21
-----ATAATGCCCTAAAAATCCTTAT----- mirR 23 20
-----TGCCCTAAAAATCCTTA----- mirR 18 12
-----ATGCCCTAAAAATCCTTA----- mirR 19 12
-----AATGCCCTAAAAATCCTTATTG----- mirR 23 10
-----ATAATGCCCTAAAAATCCTTA----- mirR 22 4
-----TCATAATGCCCTAAAAATCCTTAT----- mirR 25 4
-----CATAATGCCCTAAAAATCCT----- mirR 21 3
-----ATAATGCCCTAAAAATCC----- mirR 19 3
-----AATGCCCTAAAAATCCTTATTGT----- mirR 24 3
-----TGCCCTAAAAATCCTTATT----- mirR 20 2
-----CATAATGCCCTAAAAATCCTT----- mirR 22 1
-----CATAATGCCCTAAAAAT----- mirR 18 1
-----TCATAATGCCCTAAAAATCCT----- mirR 22 1
-----ATGCCCTAAAAATCCTT----- mirR 18 1
-----ATAATGCCCTAAAAATC----- mirR 18 1
-----TCATAATGCCCTAAAAA----- mirR 18 1
-----CATAATGCCCTAAAAATCC----- mirR 20 1
-----CATAATGCCCTAAAAATCCTTAT----- mirR 24 1
-----ATAATGCCCTAAAAATCCT----- mirR 20 1
-----TCATAATGCCCTAAAAATCCTT----- mirR 23 1
-----ATAATGCCCTAAAAATCCTT----- mirR 21 1
-----TGTTCTTGCAAGTGTGCA-- morR 18 1
-----TGTTCTTGCAAGTGTGCATC morR 19 1

>mmu-mir-365-1
TGATTGGTTACCGCAGGGAAAAATGAGGACTTTTGGGGGCAGATGTGTTTCCATTCCGCTATCATAATGCCCTAAAAATCCTTATTGCTTCTTGCAAGTATTCCTCGGGGG species len reads
TGATTGGTTACCGCAGGGAAA----- morL 21 6
TGATTGGTTACCGCAGGGAAAA----- morL 22 4
-----TACCGCAGGGAAAATGAG----- morL 18 1
-----ACCGCAGGGAAAATGAG----- morL 18 1
-----AGGACTTTTGGGGGCAGATGTG----- mirL 23 6
-----AGGACTTTTGGGGGCAGATGTGT----- mirL 24 4

```

```

-----GGGACTTTTGGGGGCAGATGTGT----- mirL 23 3
-----GGGACTTTTGGGGGCAGATG----- mirL 20 3
-----AGGGACTTTTGGGGGCAGATG----- mirL 21 2
-----TGAGGGACTTTTGGGGGCA----- mirL 19 1
-----AGGGACTTTTGGGGGCAGATGTGTT----- mirL 25 1
-----GGGACTTTTGGGGGCAGATGTGTT----- mirL 24 1
-----TGAGGGACTTTTGGGGGCAGATGTG----- mirL 25 1
-----ATGAGGGACTTTTGGGGGC----- mirL 19 1
-----AGGGACTTTTGGGGGCAG----- mirL 18 1
-----TAATGCCCTAAAAATCCTTAT----- mirR 22 62700
-----TAATGCCCTAAAAATCCTTA----- mirR 21 5432
-----AATGCCCTAAAAATCCTTAT----- mirR 21 4281
-----TAATGCCCTAAAAATCC----- mirR 18 1961
-----TAATGCCCTAAAAATCCTT----- mirR 20 744
-----TAATGCCCTAAAAATCCTTATT----- mirR 23 742
-----AATGCCCTAAAAATCCTTA----- mirR 20 408
-----TAATGCCCTAAAAATCCT----- mirR 19 400
-----AATGCCCTAAAAATCCTTATT----- mirR 22 117
-----TAATGCCCTAAAAATCCTTATTG----- mirR 24 107
-----ATGCCCTAAAAATCCTTAT----- mirR 20 81
-----AATGCCCTAAAAATCCTT----- mirR 19 63
-----TGCCCTAAAAATCCTTAT----- mirR 19 38
-----AATGCCCTAAAAATCCT----- mirR 18 21
-----ATAATGCCCTAAAAATCCTTAT----- mirR 23 20
-----ATGCCCTAAAAATCCTTA----- mirR 19 12
-----TGCCCTAAAAATCCTTA----- mirR 18 12
-----AATGCCCTAAAAATCCTTATTG----- mirR 23 10
-----TCATAATGCCCTAAAAATCCTTAT----- mirR 25 4
-----ATAATGCCCTAAAAATCCTTA----- mirR 22 4
-----AATGCCCTAAAAATCCTTATTGC----- mirR 24 4
-----ATAATGCCCTAAAAATCC----- mirR 19 3
-----CATAATGCCCTAAAAATCCT----- mirR 21 3
-----TGCCCTAAAAATCCTTATT----- mirR 20 2
-----CATAATGCCCTAAAAATCCTTAT----- mirR 24 1
-----TCATAATGCCCTAAAAATCCTT----- mirR 23 1
-----ATAATGCCCTAAAAATCCTT----- mirR 21 1
-----CATAATGCCCTAAAAAT----- mirR 18 1
-----ATAATGCCCTAAAAATCCT----- mirR 20 1
-----TCATAATGCCCTAAAAA----- mirR 18 1
-----CATAATGCCCTAAAAATCC----- mirR 20 1
-----CATAATGCCCTAAAAATCCTT----- mirR 22 1
-----ATAATGCCCTAAAAATC----- mirR 18 1
-----TCATAATGCCCTAAAAATCCT----- mirR 22 1
-----ATGCCCTAAAAATCCTT----- mirR 18 1
-----TCTTGCAGTATTCCTCGGGG morR 21 1
-----TCTTGCAGTATTCCTCGGG-- morR 19 1

```



```

-----TATTGCTCTTGCAAGTATTC----- morR 20 1

>mmu-mir-27b
GCGATGACCTCTCTAACAAGGTGCAGAGCTTAGCTGATTGGTGAACAGTGATTGGTTCCGCTTTGTTACAGTGGCTAAGTTCTGCACCTGAAGAGAAGGTGAGA species len reads
-CGATGACCTCTCTAACAAGGTGC----- morL 23 6
---ATGACCTCTCTAACAAGGTGC----- morL 21 3
GCGATGACCTCTCTAACAAGGTGCA----- morL 25 3
--GATGACCTCTCTAACAAGGTGC----- morL 22 2
---CCTCTCTAACAAGGTGCA----- morL 18 2
---TGACCTCTCTAACAAGGTGCA----- morL 21 1
GCGATGACCTCTCTAACAAGGTGC----- morL 24 1
-CGATGACCTCTCTAACAAGG----- morL 20 1
-CGATGACCTCTCTAACAAGGT----- morL 21 1
-----AGAGCTTAGCTGATTGGTGA----- mirL 20 456
-----AGAGCTTAGCTGATTGGTGAAC----- mirL 22 435
-----AGAGCTTAGCTGATTGGTGA----- mirL 21 426
-----AGAGCTTAGCTGATTGGTGAACA----- mirL 23 166
-----AGAGCTTAGCTGATTGGTG----- mirL 19 113
-----AGAGCTTAGCTGATTGGTGAACAG----- mirL 24 98
-----AGAGCTTAGCTGATTGGT----- mirL 18 47
-----AGCTTAGCTGATTGGTGA----- mirL 18 24
-----AGCTTAGCTGATTGGTGAA----- mirL 19 20
-----GAGCTTAGCTGATTGGTGAAC----- mirL 21 19
-----GAGCTTAGCTGATTGGTGAA----- mirL 20 18
-----GCTTAGCTGATTGGTGAA----- mirL 18 15
-----GAGCTTAGCTGATTGGTGA----- mirL 19 12
-----CAGAGCTTAGCTGATTGGTGA----- mirL 21 8
-----GCTTAGCTGATTGGTGAAC----- mirL 19 7
-----CAGAGCTTAGCTGATTGGTGAA----- mirL 22 7
-----CAGAGCTTAGCTGATTGGTGAACA----- mirL 24 5
-----GAGCTTAGCTGATTGGTGAACA----- mirL 22 4
-----GCTTAGCTGATTGGTGAACA----- mirL 20 4
-----GAGCTTAGCTGATTGGTG----- mirL 18 3
-----AGCTTAGCTGATTGGTGAAC----- mirL 20 3
-----CAGAGCTTAGCTGATTGGTGAAC----- mirL 23 2
-----CAGAGCTTAGCTGATTGG----- mirL 18 1
-----CAGAGCTTAGCTGATTGGTG----- mirL 20 1
-----AGCTTAGCTGATTGGTGAACAG----- mirL 22 1
-----GCTTAGCTGATTGGTGAACAG----- mirL 21 1
-----TGCAGAGCTTAGCTGATTG----- mirL 19 1
-----TTCACAGTGGCTAAGTTCTGC----- mirR 21 25257
-----TTCACAGTGGCTAAGTTCTG----- mirR 20 14392
-----TTCACAGTGGCTAAGTTCT----- mirR 19 13148
-----TTCACAGTGGCTAAGTTCTGCAC----- mirR 23 10114
-----TTCACAGTGGCTAAGTTCTGCA----- mirR 22 5334
-----TTCACAGTGGCTAAGTTCTGCACC----- mirR 24 1270

```

```

-----TCACAGTGGCTAAGTTCTGC----- mirR 20 1076
-----GTTACACAGTGGCTAAGTTCTGC----- mirR 22 1062
-----TCACAGTGGCTAAGTTCTG----- mirR 19 753
-----TCACAGTGGCTAAGTTCT----- mirR 18 684
-----TCACAGTGGCTAAGTTCTGCAC----- mirR 22 503
-----TCACAGTGGCTAAGTTCTGCA----- mirR 21 256
-----GTTACACAGTGGCTAAGTTCT----- mirR 20 185
-----GTTACACAGTGGCTAAGTTCTG----- mirR 21 151
-----TTCACAGTGGCTAAGTTCTGCACCT----- mirR 25 130
-----TCACAGTGGCTAAGTTCTGCACC----- mirR 23 120
-----GTTACACAGTGGCTAAGTTCTGCA----- mirR 23 92
-----CACAGTGGCTAAGTTCTG----- mirR 18 53
-----GTTACACAGTGGCTAAGTTCTGCAC----- mirR 24 30
-----GTTACACAGTGGCTAAGTTCTGCACC----- mirR 25 20
-----ACAGTGGCTAAGTTCTGC----- mirR 18 19
-----TCACAGTGGCTAAGTTCTGCACCT----- mirR 24 11
-----GTTACACAGTGGCTAAGTTC----- mirR 19 9
-----CACAGTGGCTAAGTTCTGCAC----- mirR 21 8
-----CACAGTGGCTAAGTTCTGC----- mirR 19 6
-----CACAGTGGCTAAGTTCTGCA----- mirR 20 4
-----ACAGTGGCTAAGTTCTGCACC----- mirR 21 4
-----ACAGTGGCTAAGTTCTGCAC----- mirR 20 4
-----CACAGTGGCTAAGTTCTGCACC----- mirR 22 3
-----TGTTACACAGTGGCTAAGTTCTG----- mirR 22 2
-----ACAGTGGCTAAGTTCTGCA----- mirR 19 1
-----CACAGTGGCTAAGTTCTGCACCT----- mirR 23 1
-----TTGTTACACAGTGGCTAAGTTC----- mirR 21 1
-----TTGTTACACAGTGGCTAAGTT----- mirR 20 1
-----TTGTTACACAGTGGCTAAGTTCTG----- mirR 23 1
-----TGTTACACAGTGGCTAAGTTCTGC----- mirR 23 1
-----GCACCTGAAGAGAAGGTG--- morR 18 2
-----TGCACCTGAAGAGAAGGT--- morR 18 2
-----CCTGAAGAGAAGGTGAGA morR 18 1

```

>mmu-mir-1839

```

GAAAAGGTAGATAGAACAGGTCTTGTGTTGCAAAATAAATTCAAGACCTACTTATCTACCAACAGCCATTGCCTACGTCCCACAG species len reads
---AAGGTAGATAGAACAGGTCTTG----- mirL 22 22699
---AAGGTAGATAGAACAGGTCTTGT----- mirL 23 11327
---AAGGTAGATAGAACAGGTCTT----- mirL 21 6382
---AGGTAGATAGAACAGGTCTTG----- mirL 21 2788
---AAGGTAGATAGAACAGGTCT----- mirL 20 2516
---AAGGTAGATAGAACAGGTC----- mirL 19 2418
---AGGTAGATAGAACAGGTCTTGT----- mirL 22 2284
---AAGGTAGATAGAACAGGTCTTGT----- mirL 24 1571
---AGGTAGATAGAACAGGTCTTGT----- mirL 23 623
---AGGTAGATAGAACAGGTCTT----- mirL 20 589

```

```

---AAGGTAGATAGAACAGGT----- mirL 18 420
---AGGTAGATAGAACAGGTCT----- mirL 19 270
---AGGTAGATAGAACAGGTC----- mirL 18 192
--AAAGGTAGATAGAACAGGTCTTG----- mirL 23 152
--AAAGGTAGATAGAACAGGTCTT----- mirL 22 83
---AGGTAGATAGAACAGGTCTTGTTT----- mirL 24 70
--AAAGGTAGATAGAACAGGTCT----- mirL 21 52
--AAAGGTAGATAGAACAGGTCTTGT----- mirL 24 48
--AAAGGTAGATAGAACAGGTCTTGT----- mirL 25 16
----GGTAGATAGAACAGGTCTTG----- mirL 20 14
--AAAGGTAGATAGAACAGGTC----- mirL 20 14
----GTAGATAGAACAGGTCTTG----- mirL 19 11
-AAAAGGTAGATAGAACAGGTCTT----- mirL 23 8
-AAAAGGTAGATAGAACAGGTCTTG----- mirL 24 6
----GGTAGATAGAACAGGTCTT----- mirL 19 5
--AAAGGTAGATAGAACAGGT----- mirL 19 4
----GGTAGATAGAACAGGTCTTGT----- mirL 21 4
-AAAAGGTAGATAGAACAGGTCT----- mirL 22 4
----GTAGATAGAACAGGTCTT----- mirL 18 2
----GGTAGATAGAACAGGTCT----- mirL 18 2
-AAAAGGTAGATAGAACAG----- mirL 18 1
----GTAGATAGAACAGGTCTTGT----- mirL 21 1
-AAAAGGTAGATAGAACAGG----- mirL 19 1
GAAAAGGTAGATAGAACAGG----- mirL 20 1
----GTAGATAGAACAGGTCTTGT----- mirL 20 1
-AAAAGGTAGATAGAACAGGTC----- mirL 21 1
GAAAAGGTAGATAGAACAGGTC----- mirL 22 1
-----GTTTGCAAATAAATTCAA----- loop 19 1
-----AGACCTACTTATCTACCAACA----- mirR 21 9455
-----AGACCTACTTATCTACCAACAG----- mirR 22 3742
-----AGACCTACTTATCTACCAACAGC----- mirR 23 3363
-----AGACCTACTTATCTACCAAC----- mirR 20 2035
-----AGACCTACTTATCTACCAACAGCC----- mirR 24 799
-----AGACCTACTTATCTACCAA----- mirR 19 692
-----AGACCTACTTATCTACCA----- mirR 18 201
-----AAGACCTACTTATCTACCAACA----- mirR 22 112
-----CAAGACCTACTTATCTACCAAC----- mirR 22 51
-----AAGACCTACTTATCTACCAAC----- mirR 21 24
-----AAGACCTACTTATCTACCAACAG----- mirR 23 23
-----CCTACTTATCTACCAACA----- mirR 18 17
-----GACCTACTTATCTACCAACAGC----- mirR 22 17
-----TCAAGACCTACTTATCTACCA----- mirR 21 16
-----CAAGACCTACTTATCTACCAA----- mirR 21 15
-----GACCTACTTATCTACCAACA----- mirR 20 15
-----TCAAGACCTACTTATCTACCAAC----- mirR 23 12
-----AAGACCTACTTATCTACCAACAGCC----- mirR 25 11

```

```

-----AAGACCTACTTATCTACCAACAGC----- mirR 24 10
-----ACCTACTTATCTACCAACA----- mirR 19 10
-----CAAGACCTACTTATCTACCA----- mirR 20 7
-----CCTACTTATCTACCAACAG----- mirR 19 7
-----AAGACCTACTTATCTACCAA----- mirR 20 7
-----GACCTACTTATCTACCAACAGCC----- mirR 23 6
-----CAAGACCTACTTATCTACCAACA----- mirR 23 6
-----TCAAGACCTACTTATCTACCAA----- mirR 22 6
-----CAAGACCTACTTATCTACC----- mirR 19 6
-----GACCTACTTATCTACCAAC----- mirR 19 4
-----CAAGACCTACTTATCTAC----- mirR 18 4
-----TCAAGACCTACTTATCTACC----- mirR 20 4
-----ACCTACTTATCTACCAACAGCC----- mirR 22 3
-----ACCTACTTATCTACCAACAG----- mirR 20 3
-----TCAAGACCTACTTATCTAC----- mirR 19 3
-----AAGACCTACTTATCTACCA----- mirR 19 3
-----GACCTACTTATCTACCAACAG----- mirR 21 3
-----ACCTACTTATCTACCAACAGC----- mirR 21 3
-----GACCTACTTATCTACCAA----- mirR 18 3
-----CCTACTTATCTACCAACAGC----- mirR 20 2
-----TCAAGACCTACTTATCTACCAACA----- mirR 24 2
-----CCTACTTATCTACCAACAGCC----- mirR 21 1
-----GACCTACTTATCTACCAACAGCCA----- mirR 24 1
-----CAAGACCTACTTATCTACCAACAGC----- mirR 25 1
-----GCCATTGCCTACGTCCCA----- morR 18 2
-----GCCATTGCCTACGTCCCACA----- morR 20 1
-----ATTGCCTACGTCCCACAG----- morR 18 1
-----CATTGCCTACGTCCCACA----- morR 18 1
-----CAGCCATTGCCTACGTCC----- morR 18 1

```

>mmu-mir-22

```

CTCACCTGGCTGAGCCGAGTAGTTCTTCAGTGGCAAGCTTTTATGTCCTGACCCAGCTAAAGCTGCCAGTTGAAGAAGCTGTTGCCCTCTGCCCCTGGCTTCGTGG species len reads
CTCACCTGGCTGAGCCGC----- morL 18 2
-----AGTTCTTCAGTGGCAAGCTTT----- mirL 21 24741
-----AGTTCTTCAGTGGCAAGCTTTA----- mirL 22 16852
-----AGTTCTTCAGTGGCAAGCTTTAT----- mirL 23 4200
-----AGTTCTTCAGTGGCAAGCTT----- mirL 20 2406
-----AGTTCTTCAGTGGCAAGC----- mirL 18 1126
-----AGTTCTTCAGTGGCAAGCT----- mirL 19 1000
-----GTTCTTCAGTGGCAAGCTTTA----- mirL 21 125
-----GTTCTTCAGTGGCAAGCTTT----- mirL 20 96
-----AGTTCTTCAGTGGCAAGCTTTATG----- mirL 24 85
-----TCTTCAGTGGCAAGCTTTA----- mirL 19 54
-----TCTTCAGTGGCAAGCTTT----- mirL 18 36
-----TAGTTCTTCAGTGGCAAGCTTT----- mirL 22 31
-----GTTCTTCAGTGGCAAGCTTTAT----- mirL 22 24

```

```

-----TTCTTCAGTGGCAAGCTTT----- mirL 19 21
-----GTTCTTCAGTGGCAAGCTT----- mirL 19 16
-----TTCTTCAGTGGCAAGCTTTA----- mirL 20 14
-----TCTTCAGTGGCAAGCTTTAT----- mirL 20 7
-----TAGTTCTTCAGTGGCAAGCTT----- mirL 21 4
-----TTCTTCAGTGGCAAGCTT----- mirL 18 3
-----TAGTTCTTCAGTGGCAAGCTTTAT----- mirL 24 3
-----TAGTTCTTCAGTGGCAAGCTTTA----- mirL 23 2
-----GTAGTTCTTCAGTGGCAAGCTTT----- mirL 23 2
-----TAGTTCTTCAGTGGCAAGCTTTATG----- mirL 25 1
-----GTTCTTCAGTGGCAAGCTTTATG----- mirL 23 1
-----TTCTTCAGTGGCAAGCTTTAT----- mirL 21 1
-----AGTAGTTCTTCAGTGGCA----- mirL 18 1
-----TAGTTCTTCAGTGGCAAG----- mirL 18 1
-----GTAGTTCTTCAGTGGCAA----- mirL 18 1
-----ATGTCCTGACCCAGCTAA----- loop 18 1
-----AAGCTGCCAGTTGAAGAAGTGT----- mirR 22 10506
-----AAGCTGCCAGTTGAAGAAGTGT----- mirR 23 3254
-----AAGCTGCCAGTTGAAGAAGTGT----- mirR 19 2540
-----AAGCTGCCAGTTGAAGAAGTGT----- mirR 24 1723
-----AAGCTGCCAGTTGAAGAAGTGT----- mirR 21 1297
-----AAGCTGCCAGTTGAAGAAGTGT----- mirR 20 1184
-----AAGCTGCCAGTTGAAGAAGTGT----- mirR 18 567
-----AGCTGCCAGTTGAAGAAGTGT----- mirR 21 16
-----CTGCCAGTTGAAGAAGTGT----- mirR 19 9
-----GCTGCCAGTTGAAGAAGTGT----- mirR 20 8
-----GCTGCCAGTTGAAGAAGTGT----- mirR 21 7
-----AGCTGCCAGTTGAAGAAGTGT----- mirR 18 7
-----AAAGCTGCCAGTTGAAGAAGTGT----- mirR 21 6
-----AGCTGCCAGTTGAAGAAGTGT----- mirR 19 6
-----CTGCCAGTTGAAGAAGTGT----- mirR 18 4
-----AAAGCTGCCAGTTGAAGAAGTGT----- mirR 23 4
-----GCTGCCAGTTGAAGAAGTGT----- mirR 22 4
-----AGCTGCCAGTTGAAGAAGTGT----- mirR 22 3
-----AAAGCTGCCAGTTGAAGAAGTGT----- mirR 19 3
-----AGCTGCCAGTTGAAGAAGTGT----- mirR 20 3
-----GCTGCCAGTTGAAGAAGTGT----- mirR 19 3
-----AAAGCTGCCAGTTGAAGAAGTGT----- mirR 18 3
-----AAAGCTGCCAGTTGAAGAAGTGT----- mirR 20 2
-----AGCTGCCAGTTGAAGAAGTGT----- mirR 23 2
-----CTGCCAGTTGAAGAAGTGT----- mirR 20 2
-----AAAGCTGCCAGTTGAAGAAGTGT----- mirR 24 1
-----CTGCCAGTTGAAGAAGTGT----- mirR 24 1
-----GCTGCCAGTTGAAGAAGTGT----- mirR 18 1
-----AAAGCTGCCAGTTGAAGAAGTGT----- mirR 22 1
-----GCTGCCAGTTGAAGAAGTGT----- mirR 23 1

```

```

-----CCCTCTGCCCCCTGGCTTC----- morR 18 2
-----GTTGCCCTCTGCCCTGG----- morR 18 1
-----CCCTCTGCCCCCTGGCTTCGTGG morR 22 1

>mmu-mir-296
GTGACAAGAGGGCCTTTCTGGAGGGCCCCCTCAATCCTGTTGTGCTCGCTTCAGAGGGTTGGGTGGAGGCTCTCCTGAAGGTGTCCGCAGAGCGTCGC species len reads
---ACAAGAGGGCCTTTCTGG----- morL 18 7
---ACAAGAGGGCCTTTCTGGA----- morL 19 2
---AGAGGGCCTTTCTGGAGG----- morL 18 2
---ACAAGAGGGCCTTTCTGGAG----- morL 20 1
GTGACAAGAGGGCCTTTCTGGA----- morL 18 1
---CAAGAGGGCCTTTCTGGA----- morL 18 1
-----AGGGCCCCCCTCAATCCTGT----- mirL 21 58850
-----AGGGCCCCCCTCAATCCTGTT----- mirL 22 6339
-----AGGGCCCCCCTCAATCCT----- mirL 19 1097
-----AGGGCCCCCCTCAATCC----- mirL 18 947
-----AGGGCCCCCCTCAATCCTG----- mirL 20 620
-----AGGGCCCCCCTCAATCCTGTTG----- mirL 23 550
-----AGGGCCCCCCTCAATCCTGTTGT----- mirL 24 67
-----GGGCCCCCCTCAATCCTGT----- mirL 20 58
-----GGCCCCCCTCAATCCTGT----- mirL 19 56
-----GCCCCCCTCAATCCTGT----- mirL 18 36
-----GAGGGCCCCCCTCAATCCTGT----- mirL 22 20
-----GGCCCCCCTCAATCCTG----- mirL 18 11
-----GGGCCCCCCTCAATCCTGTT----- mirL 21 10
-----GCCCCCCTCAATCCTGTT----- mirL 19 5
-----GGGCCCCCCTCAATCCTG----- mirL 19 4
-----GGAGGGCCCCCCTCAATCCTGT----- mirL 23 3
-----GGCCCCCCTCAATCCTGTT----- mirL 20 3
-----GGGCCCCCCTCAATCCTGTTG----- mirL 22 1
-----GGAGGGCCCCCCTCAAT----- mirL 18 1
-----GAGGGCCCCCCTCAATC----- mirL 18 1
-----GGCCCCCCTCAATCCTGTTG----- mirL 21 1
-----GGGCCCCCCTCAATCCT----- mirL 18 1
-----GAGGGTTGGGTGGAGGCTCTCC----- mirR 22 278
-----AGGGTTGGGTGGAGGCTCTCC----- mirR 21 168
-----GAGGGTTGGGTGGAGGCTCTC----- mirR 21 67
-----GAGGGTTGGGTGGAGGCTCTCCT----- mirR 23 66
-----AGGGTTGGGTGGAGGCTCTCCT----- mirR 22 59
-----GTTGGGTGGAGGCTCTCC----- mirR 19 44
-----AGGGTTGGGTGGAGGCTCTC----- mirR 20 41
-----GAGGGTTGGGTGGAGGCTCT----- mirR 20 38
-----GGGTGGGTGGAGGCTCTCC----- mirR 20 38
-----GAGGGTTGGGTGGAGGCTCTCCTG----- mirR 24 37
-----GAGGGTTGGGTGGAGGCTC----- mirR 19 34
-----AGGGTTGGGTGGAGGCTCTCCTG----- mirR 23 25

```

```

-----GGTTGGGTGGAGGCTCTC----- mirR 18 22
-----GAGGGTTGGGTGGAGGCT----- mirR 18 17
-----GGTTGGGTGGAGGCTCTC----- mirR 19 16
-----AGGGTTGGGTGGAGGCTCTCCTGA----- mirR 24 16
-----AGGGTTGGGTGGAGGCTCT----- mirR 19 15
-----AGGGTTGGGTGGAGGCTC----- mirR 18 13
-----GGTTGGGTGGAGGCTCTCCT----- mirR 20 7
-----GGTTGGGTGGAGGCTCTCCT----- mirR 21 5
-----GGTTGGGTGGAGGCTCT----- mirR 18 4
-----AGAGGGTTGGGTGGAGGCTCTCC----- mirR 23 3
-----AGAGGGTTGGGTGGAGGC----- mirR 18 2
-----AGAGGGTTGGGTGGAGGCTCTCCT----- mirR 24 1
-----GGTTGGGTGGAGGCTCTCCTG----- mirR 22 1
-----AAGGTGTCCGCAGAGCGT--- morR 18 1
-----AGGTGTCCGCAGAGCGTCCG morR 20 1

```

>mmu-mir-378

```

GGGTGACAGAGCCACCCAGGGCTCCTGACTCCAGGTCCTGTGTGTACCTCGAAATAGCACTGGACTTGGAGTCAGAAGGCCCTGAGTGGAGTCACCTTCCC species len reads
GGGTGACAGAGCCACCCA----- morL 18 2
---GACAGAGCCACCCAGGGC----- morL 18 1
--GTGACAGAGCCACCCAGG----- morL 18 1
--GTGACAGAGCCACCCAGGGC----- morL 20 1
-----CTCCTGACTCCAGGTCCTGTGT----- mirL 22 7830
-----CTCCTGACTCCAGGTCCTGTG----- mirL 21 506
-----TCCTGACTCCAGGTCCTGTGT----- mirL 21 447
-----CTCCTGACTCCAGGTCCTGTGTG----- mirL 23 162
-----CTCCTGACTCCAGGTCCTGT----- mirL 20 125
-----CTCCTGACTCCAGGTCCTG----- mirL 19 53
-----CTCCTGACTCCAGGTCCT----- mirL 18 36
-----CTCCTGACTCCAGGTCCTGTGTGT----- mirL 24 33
-----GTCCTGACTCCAGGTCCTGT----- mirL 21 29
-----TCCTGACTCCAGGTCCTGTGTGT----- mirL 23 24
-----GTCCTGACTCCAGGTCCTGTGT----- mirL 23 20
-----CCTGACTCCAGGTCCTGTGT----- mirL 20 15
-----TCCTGACTCCAGGTCCTGTG----- mirL 20 10
-----GTCCTGACTCCAGGTCCTGTG----- mirL 22 10
-----TCCTGACTCCAGGTCCTGT----- mirL 19 6
-----TCCTGACTCCAGGTCCTGTGTG----- mirL 22 4
-----CCTGACTCCAGGTCCTGTGTGT----- mirL 22 3
-----GTCCTGACTCCAGGTCCT----- mirL 19 3
-----TCCTGACTCCAGGTCCTG----- mirL 18 2
-----GTCCTGACTCCAGGTCCTG----- mirL 20 2
-----TCCTGACTCCAGGTCCTGTGTGTT----- mirL 24 2
-----CCTGACTCCAGGTCCTGTGTGTTA----- mirL 24 1
-----CCTGACTCCAGGTCCTGTGTG----- mirL 21 1
-----GTTACCTCGAAATAGCAC----- loop 18 1

```

```

-----ACTGGACTTGGAGTCAGAAGGC----- mirR 22 27549
-----ACTGGACTTGGAGTCAGAAGGCC----- mirR 23 11846
-----ACTGGACTTGGAGTCAGAAGG----- mirR 21 8866
-----ACTGGACTTGGAGTCAGAAG----- mirR 20 4776
-----ACTGGACTTGGAGTCAGAAGGCCT----- mirR 24 1663
-----CTGGACTTGGAGTCAGAAGGC----- mirR 21 1084
-----ACTGGACTTGGAGTCAGAA----- mirR 19 1026
-----ACTGGACTTGGAGTCAGA----- mirR 18 792
-----CTGGACTTGGAGTCAGAAGGCC----- mirR 22 485
-----CTGGACTTGGAGTCAGAAGG----- mirR 20 406
-----CTGGACTTGGAGTCAGAAGGCCT----- mirR 23 165
-----CTGGACTTGGAGTCAGAAG----- mirR 19 126
-----GGACTTGGAGTCAGAAGGC----- mirR 19 62
-----CTGGACTTGGAGTCAGAA----- mirR 18 49
-----GGACTTGGAGTCAGAAGG----- mirR 18 37
-----CACTGGACTTGGAGTCAGAAGGC----- mirR 23 26
-----CACTGGACTTGGAGTCAGAAGG----- mirR 22 24
-----CTGGACTTGGAGTCAGAAGGCCTG----- mirR 24 22
-----GGACTTGGAGTCAGAAGGCC----- mirR 20 21
-----TGGACTTGGAGTCAGAAGGC----- mirR 20 20
-----TGGACTTGGAGTCAGAAGG----- mirR 19 18
-----TGGACTTGGAGTCAGAAGGCC----- mirR 21 13
-----CACTGGACTTGGAGTCAGAAG----- mirR 21 11
-----CACTGGACTTGGAGTCAGAAGGCC----- mirR 24 10
-----TGGACTTGGAGTCAGAAG----- mirR 18 8
-----GGACTTGGAGTCAGAAGGCCT----- mirR 21 7
-----GCACTGGACTTGGAGTCAGA----- mirR 20 6
-----CACTGGACTTGGAGTCAGA----- mirR 19 5
-----TGGACTTGGAGTCAGAAGGCCT----- mirR 22 3
-----CACTGGACTTGGAGTCAGAAGGCCT----- mirR 25 1
-----AGCACTGGACTTGGAGTCAGAAG----- mirR 23 1
-----GGACTTGGAGTCAGAAGGCCTG----- mirR 22 1
-----GCACTGGACTTGGAGTCA----- mirR 18 1
-----GCACTGGACTTGGAGTCAGAAGG----- mirR 23 1
-----CACTGGACTTGGAGTCAGAAGGCCTGA----- mirR 27 1
-----GGACTTGGAGTCAGAAGGCCTGA----- mirR 23 1
-----TGGACTTGGAGTCAGAAGGCCTGA----- mirR 24 1
-----AGCACTGGACTTGGAGTCAGAAGG----- mirR 24 1
-----GCACTGGACTTGGAGTCAGAAG----- mirR 22 1
-----TGAGTGGAGTCACCTTCC----- morR 18 2
-----TGAGTGGAGTCACCTTCCC----- morR 19 1

```

>mmu-mir-582

```

TCGTAATCTGTACTCTTTGGATACAGTTGTTCAACCAGTTACTAATCTAACTAATTGTAACCTGTTGAACAACCTGAACCCAAAGGGTGCAAAGTTGGAAG species len reads
-CGTAATCTGTACTCTTTG----- morL 18 2
TCGTAATCTGTACTCTTT----- morL 18 1

```



```

-----TACAGTTGTTCAACCAGTTACT----- mirL 22 9609
-----ATACAGTTGTTCAACCAGTTAC----- mirL 22 9020
-----ATACAGTTGTTCAACCAGTTA----- mirL 21 8577
-----TACAGTTGTTCAACCAGTTAC----- mirL 21 2438
-----TACAGTTGTTCAACCAGTTA----- mirL 20 2068
-----ATACAGTTGTTCAACCAGTT----- mirL 20 1745
-----ATACAGTTGTTCAACCAGTTACT----- mirL 23 1681
-----ACAGTTGTTCAACCAGTTACT----- mirL 21 1642
-----TACAGTTGTTCAACCAGTT----- mirL 19 696
-----TACAGTTGTTCAACCAGTTACTA----- mirL 23 428
-----ACAGTTGTTCAACCAGTTAC----- mirL 20 328
-----ACAGTTGTTCAACCAGTTA----- mirL 19 275
-----ACAGTTGTTCAACCAGTTACTA----- mirL 22 217
-----TACAGTTGTTCAACCAGT----- mirL 18 196
-----ATACAGTTGTTCAACCAGT----- mirL 19 195
-----AGTTGTTCAACCAGTTACT----- mirL 19 171
-----CAGTTGTTCAACCAGTTACT----- mirL 20 119
-----TACAGTTGTTCAACCAGTTACTAA----- mirL 24 117
-----ATACAGTTGTTCAACCAGTTACTA----- mirL 24 99
-----ACAGTTGTTCAACCAGTT----- mirL 18 86
-----ATACAGTTGTTCAACCAG----- mirL 18 76
-----ACAGTTGTTCAACCAGTTACTAA----- mirL 23 49
-----GATACAGTTGTTCAACCAGTTA----- mirL 22 48
-----CAGTTGTTCAACCAGTTA----- mirL 18 38
-----GATACAGTTGTTCAACCAGTT----- mirL 21 37
-----GATACAGTTGTTCAACCAGTTAC----- mirL 23 33
-----CAGTTGTTCAACCAGTTAC----- mirL 19 30
-----AGTTGTTCAACCAGTTAC----- mirL 18 14
-----AGTTGTTCAACCAGTTACTA----- mirL 20 8
-----CAGTTGTTCAACCAGTTACTA----- mirL 21 4
-----GATACAGTTGTTCAACCAGT----- mirL 20 3
-----ACAGTTGTTCAACCAGTTACTAAT----- mirL 24 2
-----GATACAGTTGTTCAACCA----- mirL 18 2
-----GATACAGTTGTTCAACCAG----- mirL 19 1
-----GATACAGTTGTTCAACCAGTTACT----- mirL 24 1
-----AACCTGTTGAACAACCTGAACCC----- mirR 22 7700
-----CCTGTTGAACAACCTGAACCCAA----- mirR 22 6579
-----AACCTGTTGAACAACCTGAACC----- mirR 21 2288
-----TAACCTGTTGAACAACCTGAACC----- mirR 22 1845
-----CCTGTTGAACAACCTGAACCCAAA----- mirR 23 1701
-----TAACCTGTTGAACAACCTGAACCC----- mirR 23 1336
-----AACCTGTTGAACAACCTGAACCCA----- mirR 23 964
-----AACCTGTTGAACAACCTGAAC----- mirR 20 898
-----CCTGTTGAACAACCTGAACCCA----- mirR 21 884
-----TAACCTGTTGAACAACCTGAAC----- mirR 21 607
-----CCTGTTGAACAACCTGAACCC----- mirR 20 248

```

```

-----AACCTGTTGAACAACCTGAACCCAA----- mirR 24 182
-----AACCTGTTGAACAACCTGAA----- mirR 19 175
-----ACCTGTTGAACAACCTGAACCC----- mirR 21 173
-----CCTGTTGAACAACCTGAACC----- mirR 19 151
-----TAACCTGTTGAACAACCTGAA----- mirR 20 104
-----TAACCTGTTGAACAACCTGAACCCA----- mirR 24 93
-----ACCTGTTGAACAACCTGAACCCA----- mirR 22 92
-----TAACCTGTTGAACAACCTGA----- mirR 19 82
-----AACCTGTTGAACAACCTGA----- mirR 18 60
-----CTGTTGAACAACCTGAACCCAA----- mirR 21 58
-----CCTGTTGAACAACCTGAAC----- mirR 18 45
-----ACCTGTTGAACAACCTGAACC----- mirR 20 42
-----GTAACCTGTTGAACAACCTGAAC----- mirR 22 25
-----CTGTTGAACAACCTGAACCCAAA----- mirR 22 21
-----CCTGTTGAACAACCTGAACCCAAAG----- mirR 24 17
-----TAACCTGTTGAACAACCTGAACCCAA----- mirR 25 15
-----GTAACCTGTTGAACAACCTGA----- mirR 20 12
-----ACCTGTTGAACAACCTGAAC----- mirR 19 10
-----ACCTGTTGAACAACCTGAACCCAA----- mirR 23 9
-----GTAACCTGTTGAACAACCTGAACC----- mirR 23 8
-----CTGTTGAACAACCTGAACCC----- mirR 19 7
-----ACCTGTTGAACAACCTGAA----- mirR 18 7
-----GTAACCTGTTGAACAACCTGAA----- mirR 21 3
-----CTGTTGAACAACCTGAACC----- mirR 18 1
-----ACCTGTTGAACAACCTGAACCCAAA----- mirR 24 1
-----TGTAACCTGTTGAACAACCTGA----- mirR 21 1
-----AAGGGTGCAAAGTTGGAAG morR 19 1
-----CCCAAAGGGTGCAAAGTT----- morR 18 1
-----CCCAAAGGGTGCAAAGTTG----- morR 19 1

>mmu-mir-195
TGCCACACCCAACCTCTCCTGGCTCTAGCAGCACAGAAATATTGGCATGGGGAAGTGAGTCTGCCAATATTGGCTGTGCTGCTCCAGGCAGGGTGGTGAGAG species len reads
-----CACCCAACCTCTCCTGGCTC----- morL 19 3
-----GCCACACCCAACCTCTCCTGG----- morL 21 2
-----ACACCCAACCTCTCCTGGCTC----- morL 20 1
-----CACCCAACCTCTCCTGGCT----- morL 18 1
-----CCAACCTCTCCTGGCTCTA----- morL 18 1
-----CCACACCCAACCTCTCCTGG----- morL 19 1
-----CACCCAACCTCTCCTGGCTCT----- morL 20 1
-----CCACACCCAACCTCTCCTGGCTCT----- morL 23 1
-----CCCACACCCAACCTCTCCTGGC----- morL 21 1
TGCCACACCCAACCTCTCCTGGC----- morL 23 1
-----TAGCAGCACAGAAATATTGGCAT----- mirL 23 25743
-----TAGCAGCACAGAAATATTGGCA----- mirL 22 16434
-----TAGCAGCACAGAAATATTGGC----- mirL 21 7814
-----TAGCAGCACAGAAATATTGGCATG----- mirL 24 4984

```

```

-----TAGCAGCACAGAAATATTGG----- mirL 20 2449
-----AGCAGCACAGAAATATTGGCAT----- mirL 22 1060
-----TAGCAGCACAGAAATATTG----- mirL 19 983
-----TAGCAGCACAGAAATATT----- mirL 18 950
-----AGCAGCACAGAAATATTGGCA----- mirL 21 495
-----AGCAGCACAGAAATATTGGCATG----- mirL 23 207
-----AGCAGCACAGAAATATTGGC----- mirL 20 150
-----AGCAGCACAGAAATATTGG----- mirL 19 88
-----AGCAGCACAGAAATATTG----- mirL 18 46
-----AGCAGCACAGAAATATTGGCATGG----- mirL 24 32
-----CAGCACAGAAATATTGGC----- mirL 18 13
-----CAGCACAGAAATATTGGCAT----- mirL 20 11
-----CAGCACAGAAATATTGGCA----- mirL 19 11
-----GCAGCACAGAAATATTGGCAT----- mirL 21 11
-----GCAGCACAGAAATATTGGC----- mirL 19 10
-----CTAGCAGCACAGAAATATTGGCAT----- mirL 24 8
-----CTAGCAGCACAGAAATATTGGC----- mirL 22 7
-----GCAGCACAGAAATATTGGCA----- mirL 20 4
-----GCAGCACAGAAATATTGG----- mirL 18 3
-----GCAGCACAGAAATATTGGCATG----- mirL 22 3
-----GCAGCACAGAAATATTGGCATGGG----- mirL 24 2
-----CTAGCAGCACAGAAATATTGGCA----- mirL 23 2
-----TCTAGCAGCACAGAAATATTGGCAT----- mirL 25 2
-----GCAGCACAGAAATATTGGCATGG----- mirL 23 2
-----TCTAGCAGCACAGAAATATTGGC----- mirL 23 1
-----CTAGCAGCACAGAAATATTGGCATG----- mirL 25 1
-----CCAATATTGGCTGTGCTGCTCC----- mirR 22 3289
-----CCAATATTGGCTGTGCTGCTCCA----- mirR 23 434
-----CCAATATTGGCTGTGCTGCTC----- mirR 21 286
-----CCAATATTGGCTGTGCTGCTCCAG----- mirR 24 118
-----CAATATTGGCTGTGCTGCTCC----- mirR 21 101
-----CCAATATTGGCTGTGCTGCT----- mirR 20 68
-----ATATTGGCTGTGCTGCTCC----- mirR 19 49
-----AATATTGGCTGTGCTGCTCC----- mirR 20 36
-----CCAATATTGGCTGTGCTGC----- mirR 19 24
-----CCAATATTGGCTGTGCTGCTCCAGG----- mirR 25 17
-----CAATATTGGCTGTGCTGCTCCA----- mirR 22 9
-----CAATATTGGCTGTGCTGCTC----- mirR 20 7
-----ATATTGGCTGTGCTGCTCCA----- mirR 20 6
-----GCCAATATTGGCTGTGCTGCTCC----- mirR 23 5
-----CAATATTGGCTGTGCTGCTCCAG----- mirR 23 4
-----ATATTGGCTGTGCTGCTC----- mirR 18 3
-----AATATTGGCTGTGCTGCTCCA----- mirR 21 2
-----CAATATTGGCTGTGCTGCTCCAGG----- mirR 24 2
-----CAATATTGGCTGTGCTGCT----- mirR 19 2
-----AATATTGGCTGTGCTGCT----- mirR 18 1

```

```

-----TGCCAATATTGGCTGTGC----- mirR 18 1
-----AATATTGGCTGTGCTGCTC----- mirR 19 1
-----GCCAATATTGGCTGTGCTGCTCCA----- mirR 24 1
-----AATATTGGCTGTGCTGCTCCAG----- mirR 22 1
-----CCAGGCAGGGTGGTGAGA----- morR 18 4
-----CAGGCAGGGTGGTGAGAG----- morR 18 1
-----TCCAGGCAGGGTGGTGAGAG----- morR 20 1

```

>mmu-mir-598

| Species | Len | Reads |
|---------|-----|-------|
| morL    | 19  | 583   |
| morL    | 18  | 98    |
| morL    | 20  | 17    |
| morL    | 21  | 13    |
| morL    | 18  | 6     |
| morL    | 20  | 6     |
| morL    | 18  | 1     |
| morL    | 20  | 1     |
| morL    | 19  | 1     |
| mirL    | 21  | 153   |
| mirL    | 23  | 46    |
| mirL    | 22  | 44    |
| mirL    | 20  | 22    |
| mirL    | 19  | 14    |
| mirL    | 18  | 11    |
| mirL    | 19  | 10    |
| mirL    | 18  | 10    |
| mirL    | 19  | 9     |
| mirL    | 21  | 7     |
| mirL    | 20  | 4     |
| mirL    | 18  | 4     |
| mirL    | 21  | 3     |
| mirL    | 20  | 3     |
| mirL    | 23  | 2     |
| mirL    | 20  | 2     |
| mirL    | 24  | 2     |
| mirL    | 22  | 1     |
| mirL    | 19  | 1     |
| mirR    | 23  | 28467 |
| mirR    | 22  | 14524 |
| mirR    | 24  | 6897  |
| mirR    | 21  | 5876  |
| mirR    | 20  | 2801  |
| mirR    | 25  | 1649  |
| mirR    | 18  | 1153  |
| mirR    | 22  | 792   |

```

-----ACGTCATCGTCGTCATCGTTA----- mirR 21 408
-----ACGTCATCGTCGTCATCGTT----- mirR 20 112
-----CGTCATCGTCGTCATCGTTA----- mirR 20 95
-----ACGTCATCGTCGTCATCGTTATC----- mirR 23 93
-----GTCATCGTCGTCATCGTTA----- mirR 19 84
-----ACGTCATCGTCGTCATCGT----- mirR 19 76
-----ACGTCATCGTCGTCATCGTTATCA----- mirR 24 45
-----CGTCATCGTCGTCATCGTTAT----- mirR 21 30
-----ACGTCATCGTCGTCATCG----- mirR 18 26
-----CGTCATCGTCGTCATCGT----- mirR 18 18
-----GTCATCGTCGTCATCGTTAT----- mirR 20 18
-----CTACGTCATCGTCGTCATCGTT----- mirR 22 9
-----CTACGTCATCGTCGTCATCGT----- mirR 21 8
-----CGTCATCGTCGTCATCGTT----- mirR 19 6
-----CTACGTCATCGTCGTCATCGTTAT----- mirR 24 5
-----GTCATCGTCGTCATCGTT----- mirR 18 4
-----CTACGTCATCGTCGTCATCGTTATC----- mirR 25 3
-----CTACGTCATCGTCGTCATCGTTA----- mirR 23 3
-----CTACGTCATCGTCGTCATC----- mirR 19 3
-----GTCATCGTCGTCATCGTTATCA----- mirR 22 3
-----CTACGTCATCGTCGTCATCG----- mirR 20 1
-----CGTCATCGTCGTCATCGTTATCA----- mirR 23 1
-----GCTACGTCATCGTCGTCATCGTTA----- mirR 24 1
-----GTCATCGTCGTCATCGTTATC----- mirR 21 1
-----CGTCATCGTCGTCATCGTTATC----- mirR 22 1
-----TCATCATCAGCACAGCCATCAGATC----- morR 25 15
-----TCATCATCAGCACAGCCATCA----- morR 21 6
-----TCATCATCAGCACAGCCATCAGATCGCTGGCACCC morR 35 4
-----TCATCATCAGCACAGCCATCAG----- morR 22 4
-----TCATCATCAGCACAGCCATC----- morR 20 3
-----TCATCATCAGCACAGCCA----- morR 18 2
-----CATCATCAGCACAGCCATCAGATC----- morR 24 2
-----TCATCATCAGCACAGCCATCAGAT----- morR 24 2
-----ATCATCATCATCAGCACAG----- morR 19 1
-----CATCATCATCAGCACAGC----- morR 18 1
-----ATCATCATCATCAGCACAGCCAT----- morR 23 1
-----TATCATCATCATCAGCACAG----- morR 20 1

```

>mmu-mir-384

```

CTTGCAGCGGAATGTAAATCAGGAATGTAAACAATTCTAGGCAATGTGTATAATGTTGGTAAGTCATTCTAGAAATTGTTTACAAATGCCTGTAACATATATTCAG species len reads
----AGCGGAATGTAAATCAGGAAT----- morL 22 41
----CAGCGGAATGTAAATCAGGAAT----- morL 23 19
----CAGCGGAATGTAAATCAGGAATT----- morL 24 11
----AGCGGAATGTAAATCAGGAATT----- morL 23 11
----GGAATGTAAATCAGGAAT----- morL 19 8
----CGGAATGTAAATCAGGAAT----- morL 20 5

```

```

-----AGCGGAATGTTAAATCAGGA----- morL 20 4
-----GGAATGTTAAATCAGGAATT----- morL 20 2
-----GAATGTTAAATCAGGAATT----- morL 19 2
----CAGCGGAATGTTAAATCAGGAA----- morL 22 1
----CGGAATGTTAAATCAGGAATT----- morL 21 1
----CAGCGGAATGTTAAATCAGG----- morL 20 1
-----GAATGTTAAATCAGGAAT----- morL 18 1
----GCGGAATGTTAAATCAGGAAT----- morL 21 1
--CAGCGGAATGTTAAATCAGGAATTGT----- morL 26 1
--CAGCGGAATGTTAAATCAGGA----- morL 21 1
-----AATGTTAAATCAGGAATTG----- morL 19 1
CTTGCAGCGGAATGTTAAATCAGG----- morL 24 1
-----TGTAACAATTCCTAGGCAATGT----- mirL 23 11452
-----TGTAACAATTCCTAGGCAATG----- mirL 22 3188
-----TGTAACAATTCCTAGGCAATGTG----- mirL 24 2011
-----TAAACAATTCCTAGGCAATGTGT----- mirL 23 1470
-----TGTAACAATTCCTAGGCAA----- mirL 20 1330
-----TGTAACAATTCCTAGGC----- mirL 18 1144
-----TGTAACAATTCCTAGGCA----- mirL 19 1111
-----GTAACAATTCCTAGGCAATGT----- mirL 22 1010
-----TGTAACAATTCCTAGGCAAT----- mirL 21 904
-----TAAACAATTCCTAGGCAATGT----- mirL 21 482
-----TAAACAATTCCTAGGCAATGTG----- mirL 22 351
-----GTAACAATTCCTAGGCAATG----- mirL 21 321
-----GTAACAATTCCTAGGCAATGTG----- mirL 23 306
-----TAAACAATTCCTAGGCAATG----- mirL 20 163
-----AAACAATTCCTAGGCAATGTGT----- mirL 22 138
-----TAAACAATTCCTAGGCAATGTGTA----- mirL 24 127
-----GTAACAATTCCTAGGCAA----- mirL 19 125
-----GTAACAATTCCTAGGCAAT----- mirL 20 103
-----TAAACAATTCCTAGGCAAT----- mirL 19 80
-----GTAACAATTCCTAGGCAATGTGT----- mirL 24 78
-----AAACAATTCCTAGGCAATGT----- mirL 20 58
-----GTAACAATTCCTAGGCA----- mirL 18 52
-----AAACAATTCCTAGGCAATG----- mirL 19 34
-----AAACAATTCCTAGGCAATGTG----- mirL 21 31
-----TAAACAATTCCTAGGCAATGTGTAT----- mirL 25 23
-----AAACAATTCCTAGGCAATGTGTA----- mirL 23 16
-----AAACAATTCCTAGGCAAT----- mirL 18 15
-----ATTGTAACAATTCCTAGGCAAT----- mirL 23 1
-----TTGTAACAATTCCTAGGCAATGT----- mirL 24 1
-----AAACAATTCCTAGGCAATGTGTAT----- mirL 24 1
-----TTGTAACAATTCCTAGGC----- mirL 19 1
-----TTGTAACAATTCCTAGGCAAT----- mirL 22 1
-----TTGTAACAATTCCTAGGCAATG----- mirL 23 1
-----TTGTAACAATTCCTAGGCA----- mirL 20 1

```

```

-----GTATAATGTTGGTAAGTCA----- loop 19 1
-----ATTCTAGAAATTGTTACAAAT----- mirR 22 6840
-----ATTCTAGAAATTGTTAC----- mirR 19 6105
-----TCATTCTAGAAATTGTTAC----- mirR 21 6056
-----ATTCTAGAAATTGTTACAA----- mirR 21 4158
-----TCATTCTAGAAATTGTTACAA----- mirR 22 3021
-----ATTCTAGAAATTGTTACAAATG----- mirR 23 2138
-----TCATTCTAGAAATTGTTACAA----- mirR 23 1148
-----TCATTCTAGAAATTGTTCA----- mirR 20 973
-----ATTCTAGAAATTGTTCA----- mirR 18 928
-----CATTCTAGAAATTGTTAC----- mirR 20 840
-----ATTCTAGAAATTGTTACAA----- mirR 20 771
-----TCATTCTAGAAATTGTTTC----- mirR 19 428
-----CATTCTAGAAATTGTTACAA----- mirR 21 398
-----TTCCTAGAAATTGTTACAA----- mirR 19 352
-----TCATTCTAGAAATTGTTACAAAT----- mirR 24 326
-----TTCCTAGAAATTGTTACAAATG----- mirR 22 263
-----TTCCTAGAAATTGTTAC----- mirR 18 232
-----ATTCTAGAAATTGTTACAAATGC----- mirR 24 218
-----CATTCTAGAAATTGTTACAA----- mirR 22 209
-----TTCCTAGAAATTGTTACAA----- mirR 20 179
-----CATTCTAGAAATTGTTCA----- mirR 19 177
-----TTCCTAGAAATTGTTACAAAT----- mirR 21 147
-----TTCCTAGAAATTGTTACAAATGC----- mirR 23 71
-----TCATTCTAGAAATTGTT----- mirR 18 71
-----CATTCTAGAAATTGTTTC----- mirR 18 51
-----CATTCTAGAAATTGTTACAAAT----- mirR 23 41
-----TCCTAGAAATTGTTACAAAT----- mirR 20 30
-----TCCTAGAAATTGTTACAA----- mirR 19 29
-----TCCTAGAAATTGTTACAA----- mirR 18 27
-----TCCTAGAAATTGTTACAAATG----- mirR 21 23
-----CCTAGAAATTGTTACAA----- mirR 18 15
-----TTCCTAGAAATTGTTACAAATGCC----- mirR 24 8
-----CATTCTAGAAATTGTTACAAATG----- mirR 24 8
-----CCTAGAAATTGTTACAAAT----- mirR 19 6
-----TCCTAGAAATTGTTACAAATGC----- mirR 22 3
-----GTCATTCTAGAAATTGTTACAA----- mirR 24 2
-----CCTAGAAATTGTTACAAATG----- mirR 20 2
-----GTCATTCTAGAAATTGT----- mirR 18 1
-----CCTGTAACATATATTCAG morR 18 1

```

>mmu-mir-668

```

AACCAGATTCAAGGCTATCACCATCCCCTTCAGGTAAGTGTGCCTCGGGTGAAGCATGCACTTAATGTAGGTGTATGTCACTCGGCTCGGCCACTACCCAATGCTGTCCCACCCCTT species len reads
-----TCAAGGCTATCACCATCCCCTTCAG----- morL 26 7
-----TTCAAGGCTATCACCATCCCCTTC----- morL 25 5
-----ATCACCATCCCCTTCAG----- morL 18 4

```

```

-----ATTCAAGGCTATCACCATCCCCCTTCAG----- morL 28 3
-----ATCACCATCCCCCTTCAGG----- morL 19 2
-----ACCATCCCCCTTCAGGTA----- morL 18 1
-----TCAAGGCTATCACCATCCCCCTTC----- morL 24 1
-----ATTCAAGGCTATCACCATCCCCCTTCA----- morL 27 1
-----TCACCATCCCCCTTCAGGTA----- morL 20 1
-----TTCAAGGCTATCACCATCCCCCTTCAG----- morL 27 1
AACCAGATCAAGGCTATCACCATCCCCCTTC----- morL 31 1
-----TTCAAGGCTATCACCATCCCCCTTCAGG----- morL 28 1
-----TTCAAGGCTATCACCATCCCCCTTC----- morL 24 1
-----GTAAGTGTGCCTCGGGTGAGCAT----- mirL 23 27
-----GTAAGTGTGCCTCGGGTGAGCATGC----- mirL 25 19
-----GTAAGTGTGCCTCGGGTGAGC----- mirL 21 10
-----GTAAGTGTGCCTCGGGTGAGCATG----- mirL 24 7
-----TAAGTGTGCCTCGGGTGAGCATGC----- mirL 24 6
-----GTAAGTGTGCCTCGGGTGAGCA----- mirL 22 6
-----GTAAGTGTGCCTCGGGTGAG----- mirL 20 5
-----GTAAGTGTGCCTCGGGTG----- mirL 18 3
-----AAGTGTGCCTCGGGTGAGCATGC----- mirL 23 1
-----TAAGTGTGCCTCGGGTGA----- mirL 18 1
-----AGGTAAGTGTGCCTCGGG----- mirL 18 1
-----TAAGTGTGCCTCGGGTGAGC----- mirL 20 1
-----TAAGTGTGCCTCGGGTGAGCATGCAC----- mirL 26 1
-----GGTAAGTGTGCCTCGGGTG----- mirL 19 1
-----AAGTGTGCCTCGGGTGAGCAT----- mirL 21 1
-----TAAGTGTGCCTCGGGTGAGCATGCA----- mirL 25 1
-----TAAGTGTGCCTCGGGTGAGCAT----- mirL 22 1
-----CACTTAATGTAGGTGTAT----- loop 18 1
-----ACTTAATGTAGGTGTATG----- loop 18 1
-----CATGCACTTAATGTAGGT----- loop 18 1
-----CACTTAATGTAGGTGTATGT----- loop 20 1
-----TGTCACCTCGGCTCGGCCACTAC----- mirR 23 20103
-----TGTCACCTCGGCTCGGCCACTACCC----- mirR 25 11945
-----TGTCACCTCGGCTCGGCCACT----- mirR 21 5908
-----TGTCACCTCGGCTCGGCCACTACC----- mirR 24 5424
-----TGTCACCTCGGCTCGGCCACTA----- mirR 22 4110
-----TGTCACCTCGGCTCGGCCAC----- mirR 20 3747
-----ATGTCACCTCGGCTCGGCCACT----- mirR 22 1839
-----ATGTCACCTCGGCTCGGCCACTAC----- mirR 24 1136
-----ATGTCACCTCGGCTCGGCCAC----- mirR 21 1134
-----TGTCACCTCGGCTCGGCCA----- mirR 19 1090
-----TATGTCACCTCGGCTCGGCCAC----- mirR 22 749
-----ATGTCACCTCGGCTCGGCCACTA----- mirR 23 668
-----TATGTCACCTCGGCTCGGCCACT----- mirR 23 549
-----GTCACCTCGGCTCGGCCACTAC----- mirR 22 506
-----ATGTCACCTCGGCTCGGCCACTACC----- mirR 25 465

```



```

-----ATGTCACTCGGCTCGGCCACTACCC----- mirR 26 405
-----TATGTCACTCGGCTCGGCCACTAC----- mirR 25 310
-----TATGTCACTCGGCTCGGCCACTA----- mirR 24 259
-----GTCACTCGGCTCGGCCACTACCC----- mirR 24 251
-----GTCACTCGGCTCGGCCACTACC----- mirR 23 144
-----ATGTCACTCGGCTCGGCC----- mirR 19 137
-----GTCACTCGGCTCGGCCACTA----- mirR 21 131
-----GTCACTCGGCTCGGCCACT----- mirR 20 116
-----CACTCGGCTCGGCCACTAC----- mirR 20 94
-----TATGTCACTCGGCTCGGCCACTACCC----- mirR 27 86
-----TATGTCACTCGGCTCGGCC----- mirR 20 67
-----TCACTCGGCTCGGCCACTAC----- mirR 21 63
-----TATGTCACTCGGCTCGGCCACTACC----- mirR 26 59
-----GTCACTCGGCTCGGCCAC----- mirR 19 43
-----GTCACTCGGCTCGGCCACTACCCA----- mirR 25 29
-----TCACTCGGCTCGGCCACTACC----- mirR 22 24
-----CACTCGGCTCGGCCACTACC----- mirR 21 20
-----CACTCGGCTCGGCCACTA----- mirR 19 19
-----TCACTCGGCTCGGCCACTACCC----- mirR 23 12
-----TCACTCGGCTCGGCCACTA----- mirR 20 10
-----CACTCGGCTCGGCCACT----- mirR 18 9
-----CACTCGGCTCGGCCACTACCC----- mirR 22 9
-----TCACTCGGCTCGGCCACT----- mirR 19 6
-----TCACTCGGCTCGGCCAC----- mirR 18 3
-----TCACTCGGCTCGGCCACTACCCAA----- mirR 25 2
-----GTATGTCACTCGGCTCGGCCAC----- mirR 23 1
-----ACCCAATGCTGTCCCACC----- morR 18 5
-----CCCAATGCTGTCCCACC----- morR 18 2
-----CAATGCTGTCCCACCCT----- morR 18 2
-----CCAATGCTGTCCCACCC----- morR 18 2
-----CAATGCTGTCCCACCCTT----- morR 19 1
-----CCCAATGCTGTCCCACCC----- morR 19 1

```

>mmu-mir-187

```

GGATACAATGCGGGTCTCAGGCTACAACACAGGACCCGGGCGCTGCTCTGACCCCTCGTGTCTTGTGTTGCAGCCGGAGGGACGCAGGTCTGCAGCA species len reads
-----ACAATGCGGGTCTCAGG----- morL 18 1
-----ATACAATGCGGGTCTCA----- morL 18 1
GGATACAATGCGGGTCTC----- morL 18 1
-----GGCTACAACACAGGACCCGGG----- mirL 22 1033
-----GGCTACAACACAGGACCCGGG----- mirL 23 442
-----AGGCTACAACACAGGACC----- mirL 18 378
-----GGCTACAACACAGGACCCG----- mirL 19 367
-----GGCTACAACACAGGACCCGG----- mirL 21 366
-----AGGCTACAACACAGGACCCGGG----- mirL 23 350
-----GCTACAACACAGGACCCGGGCG----- mirL 23 348
-----AGGCTACAACACAGGACCCG----- mirL 21 345

```

|                                     |      |    |       |
|-------------------------------------|------|----|-------|
| -----GGCTACAACACAGGACCCGG-----      | mirL | 20 | 325   |
| -----AGGCTACAACACAGGACCCGGGCG-----  | mirL | 24 | 241   |
| -----AGGCTACAACACAGGACCCGGG-----    | mirL | 22 | 209   |
| -----AGGCTACAACACAGGACCCG-----      | mirL | 20 | 191   |
| -----GCTACAACACAGGACCCGGGCG-----    | mirL | 22 | 175   |
| -----AGGCTACAACACAGGACCC-----       | mirL | 19 | 170   |
| -----GCTACAACACAGGACCCGGGC-----     | mirL | 21 | 146   |
| -----GGCTACAACACAGGACCC-----        | mirL | 18 | 124   |
| -----GCTACAACACAGGACCCGGG-----      | mirL | 20 | 116   |
| -----GCTACAACACAGGACCCG-----        | mirL | 18 | 90    |
| -----GCTACAACACAGGACCCGG-----       | mirL | 19 | 80    |
| -----GCTACAACACAGGACCCGGGCGCT-----  | mirL | 24 | 40    |
| -----GGCTACAACACAGGACCCGGGCGC-----  | mirL | 24 | 38    |
| -----CTACAACACAGGACCCGGGC-----      | mirL | 20 | 17    |
| -----TACAACACAGGACCCGGGC-----       | mirL | 19 | 14    |
| -----TACAACACAGGACCCGGGCG-----      | mirL | 20 | 11    |
| -----TACAACACAGGACCCGGG-----        | mirL | 18 | 10    |
| -----CTACAACACAGGACCCGG-----        | mirL | 18 | 6     |
| -----CTACAACACAGGACCCGGGCG-----     | mirL | 21 | 6     |
| -----CTACAACACAGGACCCGGG-----       | mirL | 19 | 5     |
| -----TACAACACAGGACCCGGGCGCT-----    | mirL | 22 | 4     |
| -----TACAACACAGGACCCGGGCGCTGC-----  | mirL | 24 | 3     |
| -----CAGGCTACAACACAGGACCC-----      | mirL | 19 | 3     |
| -----TACAACACAGGACCCGGGCGC-----     | mirL | 21 | 2     |
| -----TCAGGCTACAACACAGGAC-----       | mirL | 19 | 1     |
| -----TCGTGTCTTGTGTTGCAGCCGG-----    | mirR | 22 | 18358 |
| -----TCGTGTCTTGTGTTGCAGC-----       | mirR | 19 | 7902  |
| -----TCGTGTCTTGTGTTGCAGCC-----      | mirR | 20 | 6972  |
| -----TCGTGTCTTGTGTTGCAGCCGGA-----   | mirR | 23 | 6933  |
| -----TCGTGTCTTGTGTTGCAGCCG-----     | mirR | 21 | 3886  |
| -----TCGTGTCTTGTGTTGCAGCCGGAG-----  | mirR | 24 | 2699  |
| -----TCGTGTCTTGTGTTGCAGCCGGAGG----- | mirR | 25 | 1925  |
| -----CGTGTCTTGTGTTGCAGCCGGA-----    | mirR | 22 | 1058  |
| -----CGTGTCTTGTGTTGCAGC-----        | mirR | 18 | 856   |
| -----CGTGTCTTGTGTTGCAGCCGG-----     | mirR | 21 | 825   |
| -----CGTGTCTTGTGTTGCAGCC-----       | mirR | 19 | 711   |
| -----CGTGTCTTGTGTTGCAGCCGGAG-----   | mirR | 23 | 660   |
| -----CGTGTCTTGTGTTGCAGCCGGAGG-----  | mirR | 24 | 636   |
| -----CTCGTGTCTTGTGTTGCAGCCGG-----   | mirR | 23 | 574   |
| -----CTCGTGTCTTGTGTTGCAGC-----      | mirR | 20 | 516   |
| -----CTCGTGTCTTGTGTTGCAGCC-----     | mirR | 21 | 412   |
| -----CTCGTGTCTTGTGTTGCAGCCG-----    | mirR | 22 | 323   |
| -----CGTGTCTTGTGTTGCAGCCG-----      | mirR | 20 | 284   |
| -----CTCGTGTCTTGTGTTGCAGCCGGAG----- | mirR | 24 | 150   |
| -----CTCGTGTCTTGTGTTGCAG-----       | mirR | 19 | 78    |
| -----CTCGTGTCTTGTGTTGCAGCCGGAG----- | mirR | 25 | 66    |

```

-----TGTCTTGTGTTGCAGCCG----- mirR 18 34
-----GTGTCTTGTGTTGCAGCCGGA----- mirR 21 28
-----GTGTCTTGTGTTGCAGCCG----- mirR 19 18
-----GTGTCTTGTGTTGCAGCCG----- mirR 20 15
-----GTGTCTTGTGTTGCAGCC----- mirR 18 14
-----TGTCTTGTGTTGCAGCCG----- mirR 19 14
-----CCTCGTGTCTTGTGTTGCAGC----- mirR 21 9
-----GTGTCTTGTGTTGCAGCCGAGG----- mirR 23 7
-----CCTCGTGTCTTGTGTTGCAGCC----- mirR 22 7
-----CCTCGTGTCTTGTGTTGCAGCCG----- mirR 23 6
-----CCTCGTGTCTTGTGTTGCAG----- mirR 20 5
-----TGTCTTGTGTTGCAGCCGAGG----- mirR 22 3
-----CCCTCGTGTCTTGTGTTGCAGC----- mirR 22 3
-----CCTCGTGTCTTGTGTTGCAGCCG----- mirR 24 3
-----GTGTCTTGTGTTGCAGCCGAG----- mirR 22 3
-----CCTCGTGTCTTGTGTTGCAGCCGGA----- mirR 25 2
-----CCCTCGTGTCTTGTGTTGCAG----- mirR 21 2
-----TGTCTTGTGTTGCAGCCGAG----- mirR 21 2
-----CCCTCGTGTCTTGTGTTG----- mirR 18 2
-----CCTCGTGTCTTGTGTTGC----- mirR 18 2
-----TGTCTTGTGTTGCAGCCGAGGG----- mirR 23 1
-----GGGACGCAGGTCTGCAGCA morR 19 1

```

>mmu-mir-26b

```

CCCCTACTGCCCCGGGACCCAGTTCAAGTAATTCAGGATAGGTTGTGGTGCTGACCAGCCTGTTCTCCATTACTTGGCTCGGGGGCCGGTGCCCTGC species len reads
--CCTACTGCCCCGGGACCCAG----- morL 19 2
--CCTACTGCCCCGGGACCCA----- morL 18 2
-CCCTACTGCCCCGGGACCCAGT----- morL 21 1
-CCCTACTGCCCCGGGACCC----- morL 18 1
CCCCTACTGCCCCGGGACCCAG----- morL 21 1
-----TTCAAGTAATTCAGGATAGGT----- mirL 21 18558
-----TTCAAGTAATTCAGGATAGGTT----- mirL 22 16567
-----TTCAAGTAATTCAGGATAGGTTG----- mirL 23 9695
-----TTCAAGTAATTCAGGATAG----- mirL 19 4945
-----TTCAAGTAATTCAGGATAGG----- mirL 20 2828
-----TTCAAGTAATTCAGGATA----- mirL 18 1410
-----TTCAAGTAATTCAGGATAGGTTGT----- mirL 24 1005
-----TCAAGTAATTCAGGATAGGT----- mirL 20 914
-----TCAAGTAATTCAGGATAGGTT----- mirL 21 802
-----TCAAGTAATTCAGGATAGGTTG----- mirL 22 766
-----TCAAGTAATTCAGGATAG----- mirL 18 392
-----TCAAGTAATTCAGGATAGG----- mirL 19 156
-----TCAAGTAATTCAGGATAGGTTGT----- mirL 23 97
-----AAGTAATTCAGGATAGGT----- mirL 18 68
-----CAAGTAATTCAGGATAGGT----- mirL 19 52
-----AAGTAATTCAGGATAGGTT----- mirL 19 47

```

```

-----CAAGTAATTCAGGATAGGTT----- mirL 20 34
-----TCAAGTAATTCAGGATAGGTTGTG----- mirL 24 17
-----CAAGTAATTCAGGATAGGTTG----- mirL 21 12
-----AAGTAATTCAGGATAGGTTG----- mirL 20 11
-----CAAGTAATTCAGGATAGG----- mirL 18 10
-----GTTCAAGTAATTCAGGATAGGT----- mirL 22 9
-----GTTCAAGTAATTCAGGATAGGTTG----- mirL 24 3
-----CAAGTAATTCAGGATAGGTTGT----- mirL 22 1
-----GTTCAAGTAATTCAGGATAGG----- mirL 21 1
-----AGTTCAAGTAATTCAGGATAGGT----- mirL 23 1
-----GTTCAAGTAATTCAGGATAGGTT----- mirL 23 1
-----CAGTTCAAGTAATTCAGGA----- mirL 19 1
-----GTTCAAGTAATTCAGGAT----- mirL 18 1
-----GGTTGTGGTGCTGACCAG----- loop 18 2
-----TGTGGTGCTGACCAGCCT----- loop 18 1
-----CCTGTTCTCCACTTGGCTC----- mirR 22 875
-----CCTGTTCTCCACTTGGCT----- mirR 21 429
-----CCTGTTCTCCACTTGGCTCG----- mirR 23 378
-----CCTGTTCTCCACTTGGC----- mirR 20 208
-----CCTGTTCTCCACTTGG----- mirR 19 102
-----CCTGTTCTCCACTTGGCTCGG----- mirR 24 87
-----CCTGTTCTCCACTTGGCTCGGG----- mirR 25 40
-----GTTCTCCACTTGGCTC----- mirR 19 37
-----CTGTTCTCCACTTGGCTC----- mirR 21 25
-----GTTCTCCACTTGGCT----- mirR 18 15
-----TGTTCTCCACTTGGCTC----- mirR 20 11
-----CTGTTCTCCACTTGGCT----- mirR 20 8
-----GTTCTCCACTTGGCTCG----- mirR 20 7
-----CTGTTCTCCACTTGGCTCG----- mirR 22 7
-----TGTTCTCCACTTGGCT----- mirR 19 6
-----TGTTCTCCACTTGGCTCG----- mirR 21 4
-----CTGTTCTCCACTTGGC----- mirR 19 4
-----GCCTGTTCTCCACTTGGCTC----- mirR 23 3
-----GCCTGTTCTCCACTTGGC----- mirR 21 3
-----GCCTGTTCTCCACTTGGCTCG----- mirR 24 3
-----AGCCTGTTCTCCACTTGGC----- mirR 22 2
-----GCCTGTTCTCCACTTGGCTCGG----- mirR 25 2
-----GCCTGTTCTCCACTTGGCT----- mirR 22 2
-----GCCTGTTCTCCACTTGG----- mirR 20 1
-----CTGTTCTCCACTTGGCTCGG----- mirR 23 1
-----AGCCTGTTCTCCACTT----- mirR 19 1
-----CTGTTCTCCACTTGG----- mirR 18 1
-----TGTTCTCCACTTGGC----- mirR 18 1
-----CGGGGGCCGGTGCCCTGC morR 18 1

```

>mmu-mir-369

|                                                                                                  | species | len | reads |
|--------------------------------------------------------------------------------------------------|---------|-----|-------|
| ACCTCTGCTGGTACTTGAAGGGAGATCGACCGTGTTATATTCGCTTGGCTGACTTCGAATAATACATGGTTGATCTTTTCTCAGTATCAACGCTCA | morL    | 23  | 1     |
| ACCTCTGCTGGTACTTGAAGGGA                                                                          | morL    | 20  | 1     |
| --CTCTGCTGGTACTTGAAGGG                                                                           | morL    | 23  | 1     |
| --CTCTGCTGGTACTTGAAGGGAGA                                                                        | morL    | 18  | 1     |
| ---TCTGCTGGTACTTGAAGG                                                                            | mirL    | 22  | 17129 |
| -----AGATCGACCGTGTTATATTCGC-----                                                                 | mirL    | 21  | 4226  |
| -----AGATCGACCGTGTTATATTCG-----                                                                  | mirL    | 20  | 4224  |
| -----AGATCGACCGTGTTATATTC-----                                                                   | mirL    | 19  | 2563  |
| -----AGATCGACCGTGTTATATT-----                                                                    | mirL    | 23  | 1697  |
| -----AGATCGACCGTGTTATATTCGCT-----                                                                | mirL    | 18  | 705   |
| -----AGATCGACCGTGTTATAT-----                                                                     | mirL    | 24  | 228   |
| -----AGATCGACCGTGTTATATTCGCTT-----                                                               | mirL    | 21  | 17    |
| -----GATCGACCGTGTTATATTCGC-----                                                                  | mirL    | 19  | 15    |
| -----GATCGACCGTGTTATATTC-----                                                                    | mirL    | 19  | 9     |
| -----TCGACCGTGTTATATTCGC-----                                                                    | mirL    | 20  | 9     |
| -----GATCGACCGTGTTATATTCG-----                                                                   | mirL    | 19  | 7     |
| -----ATCGACCGTGTTATATTCG-----                                                                    | mirL    | 20  | 7     |
| -----ATCGACCGTGTTATATTCGC-----                                                                   | mirL    | 18  | 7     |
| -----TCGACCGTGTTATATTCG-----                                                                     | mirL    | 23  | 3     |
| -----GAGATCGACCGTGTTATATTCGC-----                                                                | mirL    | 21  | 3     |
| -----ATCGACCGTGTTATATTCGCT-----                                                                  | mirL    | 18  | 3     |
| -----GATCGACCGTGTTATATT-----                                                                     | mirL    | 18  | 3     |
| -----ATCGACCGTGTTATATTC-----                                                                     | mirL    | 22  | 2     |
| -----GAGATCGACCGTGTTATATTCG-----                                                                 | mirL    | 20  | 2     |
| -----TCGACCGTGTTATATTCGCT-----                                                                   | mirL    | 20  | 2     |
| -----GAGATCGACCGTGTTATATT-----                                                                   | mirL    | 22  | 2     |
| -----GATCGACCGTGTTATATTCGCT-----                                                                 | mirL    | 19  | 1     |
| -----GAGATCGACCGTGTTATAT-----                                                                    | mirL    | 24  | 1     |
| -----GATCGACCGTGTTATATTCGCTTG-----                                                               | mirL    | 20  | 1     |
| -----GGAGATCGACCGTGTTATAT-----                                                                   | mirL    | 22  | 1     |
| -----ATCGACCGTGTTATATTCGCTT-----                                                                 | mirR    | 21  | 15434 |
| -----ATAAATACATGGTTGATCTTT-----                                                                  | mirR    | 20  | 3454  |
| -----ATAAATACATGGTTGATCTT-----                                                                   | mirR    | 22  | 3385  |
| -----ATAAATACATGGTTGATCTTTT-----                                                                 | mirR    | 22  | 2400  |
| -----GAATAATACATGGTTGATCTTT-----                                                                 | mirR    | 23  | 1545  |
| -----ATAAATACATGGTTGATCTTTTC-----                                                                | mirR    | 19  | 1005  |
| -----ATAAATACATGGTTGATCT-----                                                                    | mirR    | 21  | 555   |
| -----GAATAATACATGGTTGATCTT-----                                                                  | mirR    | 18  | 544   |
| -----ATAAATACATGGTTGATC-----                                                                     | mirR    | 23  | 452   |
| -----GAATAATACATGGTTGATCTTTT-----                                                                | mirR    | 24  | 222   |
| -----GAATAATACATGGTTGATCTTTTC-----                                                               | mirR    | 19  | 222   |
| -----GAATAATACATGGTTGATC-----                                                                    | mirR    | 20  | 204   |
| -----GAATAATACATGGTTGATCT-----                                                                   | mirR    | 18  | 81    |
| -----GAATAATACATGGTTGAT-----                                                                     | mirR    | 24  | 45    |
| -----ATAAATACATGGTTGATCTTTTCT-----                                                               | mirR    | 19  | 43    |
| -----ATAAATACATGGTTGATCTT-----                                                                   |         |     |       |

```

-----TAATACATGGTTGATCTT----- mirR 18 37
-----ATAATACATGGTTGATCTTTTC----- mirR 22 32
-----ATAATACATGGTTGATCTTT----- mirR 20 26
-----ATAATACATGGTTGATCTTT----- mirR 21 20
-----ATAATACATGGTTGATCT----- mirR 18 17
-----AATACATGGTTGATCTTT----- mirR 18 15
-----CGAATAATACATGGTTGATCTTT----- mirR 23 12
-----CGAATAATACATGGTTGATCTT----- mirR 22 10
-----TAATACATGGTTGATCTTT----- mirR 19 6
-----TAATACATGGTTGATCTTTTC----- mirR 21 5
-----TAATACATGGTTGATCTTT----- mirR 20 3
-----CGAATAATACATGGTTGATCT----- mirR 21 3
-----ATAATACATGGTTGATCTTTTCT----- mirR 23 2
-----CGAATAATACATGGTTGATCTTTTC----- mirR 25 2
-----TCGAATAATACATGGTTGATCTT----- mirR 23 2
-----AATACATGGTTGATCTTT----- mirR 19 1
-----TCGAATAATACATGGTTGATCT----- mirR 22 1
-----CGAATAATACATGGTTGATCTTT----- mirR 24 1
-----CGAATAATACATGGTTGATC----- mirR 20 1
-----TCGAATAATACATGGTTGATCTTT----- mirR 25 1
-----AATACATGGTTGATCTTTTC----- mirR 20 1
-----TCTCAGTATCAACGCTCA morR 18 1
-----TTTCTCAGTATCAACGC--- morR 18 1

```

>mmu-mir-7b

| CGGAGTACGTGAGCCAGTGCTATGTGGAAGACTTGTGATTTTGTGTTCTGATATGATATGACAACAAGTCACAGCCAGCCTCATAGCGTGACTCCTATCACCTTT | species | len | reads |
|-----------------------------------------------------------------------------------------------------------|---------|-----|-------|
| ---GTACGTGAGCCAGTGCTATG-----                                                                              | morL    | 20  | 8     |
| ---TACGTGAGCCAGTGCTATG-----                                                                               | morL    | 19  | 4     |
| CGGAGTACGTGAGCCAGTGCTATG-----                                                                             | morL    | 24  | 1     |
| ---AGTACGTGAGCCAGTGCTATG-----                                                                             | morL    | 21  | 1     |
| ---GAGTACGTGAGCCAGTGCTATG-----                                                                            | morL    | 22  | 1     |
| -----TGGAAGACTTGTGATTTTGTGTT-----                                                                         | mirL    | 24  | 23953 |
| -----TGGAAGACTTGTGATTTTGTGTT-----                                                                         | mirL    | 23  | 17838 |
| -----TGGAAGACTTGTGATTTTGTGTTTC-----                                                                       | mirL    | 25  | 4459  |
| -----TGGAAGACTTGTGATTTTGTGTT-----                                                                         | mirL    | 22  | 3699  |
| -----TGGAAGACTTGTGATTTTGT-----                                                                            | mirL    | 20  | 2151  |
| -----TGGAAGACTTGTGATTTTGT-----                                                                            | mirL    | 21  | 1221  |
| -----GGAAGACTTGTGATTTTGTGTT-----                                                                          | mirL    | 23  | 1107  |
| -----TGGAAGACTTGTGATTTTGT-----                                                                            | mirL    | 19  | 948   |
| -----GGAAGACTTGTGATTTTGTGTT-----                                                                          | mirL    | 22  | 708   |
| -----GGAAGACTTGTGATTTTGTGTT-----                                                                          | mirL    | 21  | 135   |
| -----GGAAGACTTGTGATTTTGTGTTTC-----                                                                        | mirL    | 24  | 114   |
| -----AAGACTTGTGATTTTGTGTT-----                                                                            | mirL    | 20  | 78    |
| -----GAAGACTTGTGATTTTGTGTT-----                                                                           | mirL    | 21  | 67    |
| -----GGAAGACTTGTGATTTTGT-----                                                                             | mirL    | 20  | 44    |
| -----GGAAGACTTGTGATTTTGTGTTCT-----                                                                        | mirL    | 25  | 26    |

```

-----GGAAGACTTGTGATTTTGT----- mirL 19 22
-----GAAGACTTGTGATTTTGTG----- mirL 20 8
-----GAAGACTTGTGATTTTGTGTT----- mirL 22 8
-----AAGACTTGTGATTTTGTGTT----- mirL 21 7
-----GTGGAAGACTTGTGATTTTGTGTT----- mirL 25 7
-----AAGACTTGTGATTTTGTG----- mirL 19 4
-----GTGGAAGACTTGTGATTTTGTGTT----- mirL 26 4
-----GAAGACTTGTGATTTTGTG----- mirL 19 3
-----GTGGAAGACTTGTGATTT----- mirL 18 2
-----GAAGACTTGTGATTTTGT----- mirL 18 2
-----GTGGAAGACTTGTGATTTTGTGTT----- mirL 24 1
-----GTGGAAGACTTGTGATTTTGT----- mirL 20 1
-----TGTGGAAGACTTGTGATTTTGTGTT----- mirL 26 1
-----GTGGAAGACTTGTGATTTTGT----- mirL 22 1
-----GAAGACTTGTGATTTTGTGTT----- mirL 23 1
-----AAGACTTGTGATTTTGT----- mirL 18 1
-----CAACAAGTCACAGCCAGCCTCA----- mirR 22 2238
-----CAACAAGTCACAGCCAGCCTCAT----- mirR 23 820
-----CAACAAGTCACAGCCAGCCTC----- mirR 21 426
-----CAACAAGTCACAGCCAGCC----- mirR 19 190
-----CAACAAGTCACAGCCAGCCT----- mirR 20 134
-----CAACAAGTCACAGCCAGC----- mirR 18 69
-----CAACAAGTCACAGCCAGCCTCATA----- mirR 24 42
-----ACAAGTCACAGCCAGCCTCAT----- mirR 21 16
-----AACAAAGTCACAGCCAGCCTCA----- mirR 21 10
-----AACAAAGTCACAGCCAGCCTCAT----- mirR 22 9
-----ACAACAAGTCACAGCCAG----- mirR 18 5
-----CAAGTCACAGCCAGCCTC----- mirR 18 2
-----ACAACAAGTCACAGCCAGCCTCA----- mirR 23 2
-----ACAACAAGTCACAGCCAGCC----- mirR 20 2
-----ACAAGTCACAGCCAGCCTCA----- mirR 20 2
-----ACAACAAGTCACAGCCAGCCT----- mirR 21 2
-----ACAACAAGTCACAGCCAGCCTC----- mirR 22 1
-----AACAAAGTCACAGCCAGCCT----- mirR 19 1
-----GACAACAAGTCACAGCCAGC----- mirR 20 1
-----ACAAGTCACAGCCAGCCTC----- mirR 19 1
-----GACAACAAGTCACAGCCA----- mirR 18 1
-----AACAAAGTCACAGCCAGCC----- mirR 18 1
-----CAAGTCACAGCCAGCCTCAT----- mirR 20 1
-----ACAAGTCACAGCCAGCCT----- mirR 18 1
-----ACAAGTCACAGCCAGCCTCATAG----- mirR 23 1
-----CGTGGACTCCTATCACCTTT----- morR 20 1

```

>mmu-mir-543

```

TGACGTACGGTGCTTAATGAGAAGTTGCCCGGTGTTTTTCGCTTTATATGTGACGAAACATTCGCGGTGCACTTCTTTTTTCAGCATCCTATTC species len reads
---CGTACGGTGCTTAATGAGA----- morL 19 2

```

|                                     |               |
|-------------------------------------|---------------|
| TGACGTACGGTGCTTAATGA-----           | morL 20 2     |
| --ACGTACGGTGCTTAATGAGA-----         | morL 20 1     |
| -----TACGGTGCTTAATGAGAA-----        | morL 18 1     |
| -GACGTACGGTGCTTAATGA-----           | morL 19 1     |
| ----GTACGGTGCTTAATGAGA-----         | morL 18 1     |
| -----GAAGTTGCCCGCGTGTTTTTC-----     | mirL 21 290   |
| -----AAGTTGCCCGCGTGTTTTT-----       | mirL 19 260   |
| -----AAGTTGCCCGCGTGTTTTTCG-----     | mirL 21 224   |
| -----AAGTTGCCCGCGTGTTTTTC-----      | mirL 20 177   |
| -----GAAGTTGCCCGCGTGTTTTT-----      | mirL 20 134   |
| -----AAGTTGCCCGCGTGTTTTTCG-----     | mirL 22 104   |
| -----GAAGTTGCCCGCGTGTTTTTCG-----    | mirL 22 91    |
| -----GAAGTTGCCCGCGTGTTTTTCG-----    | mirL 23 59    |
| -----GAAGTTGCCCGCGTGTTTT-----       | mirL 18 46    |
| -----AGTTGCCCGCGTGTTTTTCGCT-----    | mirL 22 43    |
| -----GAAGTTGCCCGCGTGTTTT-----       | mirL 19 29    |
| -----AAGTTGCCCGCGTGTTTT-----        | mirL 18 27    |
| -----AAGTTGCCCGCGTGTTTTTCGCT-----   | mirL 23 25    |
| -----AGTTGCCCGCGTGTTTT-----         | mirL 18 16    |
| -----AGTTGCCCGCGTGTTTTTCG-----      | mirL 20 13    |
| -----AGTTGCCCGCGTGTTTTTC-----       | mirL 19 13    |
| -----TGAGAAGTTGCCCGCGTGTTTT-----    | mirL 23 11    |
| -----TGAGAAGTTGCCCGCGTGTTTT-----    | mirL 21 10    |
| -----AGTTGCCCGCGTGTTTTTCG-----      | mirL 21 8     |
| -----AAGTTGCCCGCGTGTTTTTCGCTT-----  | mirL 24 7     |
| -----AGTTGCCCGCGTGTTTTTCGCTTT-----  | mirL 24 6     |
| -----TGAGAAGTTGCCCGCGTGTTTTTC-----  | mirL 24 5     |
| -----GAAGTTGCCCGCGTGTTTTTCGCTT----- | mirL 25 4     |
| -----TGAGAAGTTGCCCGCGTGTTTT-----    | mirL 22 3     |
| -----TGAGAAGTTGCCCGCGTGTT-----      | mirL 20 3     |
| -----AGTTGCCCGCGTGTTTTTCGCTT-----   | mirL 23 3     |
| -----GTTGCCCGCGTGTTTTTCG-----       | mirL 19 3     |
| -----GTTGCCCGCGTGTTTTTC-----        | mirL 18 3     |
| -----GAGAAGTTGCCCGCGTGTTTT-----     | mirL 22 2     |
| -----GTTGCCCGCGTGTTTTTCG-----       | mirL 20 1     |
| -----TGAGAAGTTGCCCGCGTG-----        | mirL 18 1     |
| -----GAGAAGTTGCCCGCGTGTTTT-----     | mirL 20 1     |
| -----GCTTTATATGTGACGAAA-----        | loop 18 1     |
| -----AAACATTCGCGGTGCACTTCTT-----    | mirR 22 30473 |
| -----AAACATTCGCGGTGCACTTCTTT-----   | mirR 23 8724  |
| -----AAACATTCGCGGTGCACTTCT-----     | mirR 21 5919  |
| -----AAACATTCGCGGTGCACTTC-----      | mirR 20 4986  |
| -----AAACATTCGCGGTGCACTT-----       | mirR 19 4336  |
| -----AAACATTCGCGGTGCACTTCTTT-----   | mirR 24 1557  |
| -----AAACATTCGCGGTGCACT-----        | mirR 18 957   |
| -----AACATTCGCGGTGCACTTCTTT-----    | mirR 22 252   |



```

-----AACATTCGCGGTGCACTTCTT----- mirR 21 239
-----ACATTCGCGGTGCACTTCTT----- mirR 20 116
-----ACATTCGCGGTGCACTTCTTT----- mirR 21 104
-----AACATTCGCGGTGCACTTCT----- mirR 20 104
-----AACATTCGCGGTGCACTTC----- mirR 19 94
-----CATTCGCGGTGCACTTCTT----- mirR 19 93
-----ACATTCGCGGTGCACTTCTTTT----- mirR 22 87
-----CGAAACATTCGCGGTGCACTTC----- mirR 22 60
-----ACATTCGCGGTGCACTTCT----- mirR 19 56
-----CATTCGCGGTGCACTTCT----- mirR 18 54
-----GAAACATTCGCGGTGCACTTCT----- mirR 22 54
-----AACATTCGCGGTGCACTT----- mirR 18 44
-----AACATTCGCGGTGCACTTCTTTT----- mirR 23 36
-----ACATTCGCGGTGCACTTC----- mirR 18 34
-----GAAACATTCGCGGTGCACTTCTT----- mirR 23 28
-----ACATTCGCGGTGCACTTCTTTT----- mirR 23 25
-----CGAAACATTCGCGGTGCACTT----- mirR 21 25
-----GAAACATTCGCGGTGCACTTC----- mirR 21 24
-----CGAAACATTCGCGGTGCACTTCT----- mirR 23 17
-----CGAAACATTCGCGGTGCAC----- mirR 19 10
-----CGAAACATTCGCGGTGCACT----- mirR 20 7
-----GAAACATTCGCGGTGCACTTCTTT----- mirR 24 6
-----GAAACATTCGCGGTGCACTT----- mirR 20 6
-----AACATTCGCGGTGCACTTCTTTT----- mirR 24 5
-----CATTCGCGGTGCACTTCTTT----- mirR 20 4
-----CATTCGCGGTGCACTTCTTTT----- mirR 22 4
-----GAAACATTCGCGGTGCACT----- mirR 19 3
-----CGAAACATTCGCGGTGCA----- mirR 18 3
-----GAAACATTCGCGGTGCAC----- mirR 18 2
-----ACGAAACATTCGCGGTGCACTT----- mirR 22 2
-----ACATTCGCGGTGCACTTCTTTTTC----- mirR 24 2
-----CATTCGCGGTGCACTTCTTTTTC----- mirR 23 1
-----CGAAACATTCGCGGTGCACTTCTT----- mirR 24 1
-----CTTTTTCAGCATCCTATTTC morR 19 1

```

>mmu-mir-185

```

CTTGAGTGGGGGTGAGGGATTGGAGAGAAAGGCAGTTCCTGATGGTCCCCTCCAGGGGCTGGCTTTCCTCTGGTCCTTCTCTCCAATGACTGCG species len reads
CTTGAGTGGGGGTGAGG----- morL 18 1
-----GTGGGGGTGAGGGATTG----- morL 18 1
-----TGGAGAGAAAGGCAGTTCCTGA----- mirL 22 26924
-----TGGAGAGAAAGGCAGTTCCTGAT----- mirL 23 18330
-----TGGAGAGAAAGGCAGTTC----- mirL 19 3410
-----TGGAGAGAAAGGCAGTTCCTGATG----- mirL 24 3199
-----TGGAGAGAAAGGCAGTTCCTG----- mirL 21 2799
-----TGGAGAGAAAGGCAGTTC----- mirL 18 2103
-----TGGAGAGAAAGGCAGTTCCT----- mirL 20 1000

```

```

-----GGAGAGAAAGGCAGTTCCTGA----- mirL 21 518
-----GGAGAGAAAGGCAGTTCCTGAT----- mirL 22 318
-----AGAGAAAGGCAGTTCCTGA----- mirL 19 91
-----GGAGAGAAAGGCAGTTCCTGATG----- mirL 23 85
-----GGAGAGAAAGGCAGTTCCTG----- mirL 20 54
-----GAGAGAAAGGCAGTTCCTGA----- mirL 20 38
-----GGAGAGAAAGGCAGTTCCT----- mirL 19 16
-----AGAGAAAGGCAGTTCCTGAT----- mirL 20 14
-----GGAGAGAAAGGCAGTTC----- mirL 18 11
-----GGAGAGAAAGGCAGTTCCTGATGG----- mirL 24 10
-----GAGAGAAAGGCAGTTCCTG----- mirL 19 9
-----TTGGAGAGAAAGGCAGTTCCTGAT----- mirL 24 7
-----GAGAGAAAGGCAGTTCCTGAT----- mirL 21 7
-----TTGGAGAGAAAGGCAGTTCCTGA----- mirL 23 7
-----AGAGAAAGGCAGTTCCTG----- mirL 18 6
-----TTGGAGAGAAAGGCAGTTC----- mirL 20 2
-----ATTGGAGAGAAAGGCAGTTCCTGAT----- mirL 25 2
-----TTGGAGAGAAAGGCAGTTCCTGATG----- mirL 25 2
-----ATTGGAGAGAAAGGCAGTTCCT----- mirL 22 1
-----GATTGGAGAGAAAGGCAGTTC----- mirL 22 1
-----GAGAGAAAGGCAGTTCCT----- mirL 18 1
-----ATTGGAGAGAAAGGCAGTTCCTGA----- mirL 24 1
-----TTGGAGAGAAAGGCAGTTC----- mirL 19 1
-----TTGGAGAGAAAGGCAGTT----- mirL 18 1
-----GAGAGAAAGGCAGTTCCTGATG----- mirL 22 1
-----AGAGAAAGGCAGTTCCTGATG----- mirL 21 1
-----AGGGGCTGGCTTTCCTCTGGTC----- mirR 22 96
-----AGGGGCTGGCTTTCCTCTGGT----- mirR 21 92
-----AGGGGCTGGCTTTCCTCTGGTCC----- mirR 23 40
-----AGGGGCTGGCTTTCCTCTGG----- mirR 20 27
-----AGGGGCTGGCTTTCCTCTG----- mirR 19 18
-----CAGGGGCTGGCTTTCCTCTGGT----- mirR 22 15
-----CAGGGGCTGGCTTTCCTCTGGTC----- mirR 23 10
-----AGGGGCTGGCTTTCCTCT----- mirR 18 9
-----GGCTGGCTTTCCTCTGGTC----- mirR 19 8
-----CAGGGGCTGGCTTTCCTCTGG----- mirR 21 7
-----AGGGGCTGGCTTTCCTCTGGTCC----- mirR 24 5
-----GGCTGGCTTTCCTCTGGT----- mirR 18 5
-----GGGCTGGCTTTCCTCTGGTC----- mirR 20 4
-----GGGGCTGGCTTTCCTCTGGTC----- mirR 21 3
-----GGGGCTGGCTTTCCTCTG----- mirR 18 3
-----CAGGGGCTGGCTTTCCTCTG----- mirR 20 2
-----CAGGGGCTGGCTTTCCTCT----- mirR 19 2
-----GGGCTGGCTTTCCTCTGGTCC----- mirR 21 2
-----CAGGGGCTGGCTTTCCTCTGGTCC----- mirR 24 2
-----GGCTGGCTTTCCTCTGGTCC----- mirR 20 1

```

```

-----GGGCTGGCTTTCCTCTGGT----- mirR 19 1
-----GGGCTGGCTTTCCTCTGG----- mirR 18 1
-----GGGCTGGCTTTCCTCTGGTCT----- mirR 22 1
-----CAGGGGCTGGCTTTCCTC----- mirR 18 1
-----GGGGCTGGCTTTCCTCTGGT----- mirR 20 1
-----CCCAGGGGCTGGCTTTC----- mirR 18 1
-----TCCTTCTCTCCCAATGAC---- morR 18 2
-----TCTCTCCCAATGACTGCG morR 18 1
-----CTTCTCTCCCAATGACTG-- morR 18 1

```

>mmu-mir-345

| Species                                                                                             | len | reads |
|-----------------------------------------------------------------------------------------------------|-----|-------|
| CCGACACCCAAGTCCAGGCCTGCTGACCCCTAGTCCAGTGCTTGTGGTGGCTACTGGGCCCTGAACTAGGGGTCTGGAGACCTGGGTTTGATCTCCACA | 20  | 2     |
| CCGACACCCAAGTCCAGGCC                                                                                | 19  | 1     |
| ---ACACCCAAGTCCAGGCCTG                                                                              | 18  | 1     |
| --GACACCCAAGTCCAGGCC                                                                                | 18  | 1     |
| ---ACACCCAAGTCCAGGCCT                                                                               | 18  | 1     |
| -----TGCTGACCCCTAGTCCAGTGC-----                                                                     | 21  | 23818 |
| -----GCTGACCCCTAGTCCAGTGCT-----                                                                     | 21  | 11097 |
| -----TGCTGACCCCTAGTCCAGTGCT-----                                                                    | 22  | 6501  |
| -----GCTGACCCCTAGTCCAGTGC-----                                                                      | 20  | 5920  |
| -----GCTGACCCCTAGTCCAGTGCTT-----                                                                    | 22  | 2515  |
| -----TGCTGACCCCTAGTCCAGTG-----                                                                      | 20  | 2222  |
| -----TGCTGACCCCTAGTCCAGTGCTT-----                                                                   | 23  | 1562  |
| -----GCTGACCCCTAGTCCAGTGCTTG-----                                                                   | 23  | 823   |
| -----TGCTGACCCCTAGTCCAGT-----                                                                       | 19  | 811   |
| -----GCTGACCCCTAGTCCAGTG-----                                                                       | 19  | 767   |
| -----TGCTGACCCCTAGTCCAG-----                                                                        | 18  | 742   |
| -----TGCTGACCCCTAGTCCAGTGCTTG-----                                                                  | 24  | 518   |
| -----GCTGACCCCTAGTCCAGT-----                                                                        | 18  | 238   |
| -----GCTGACCCCTAGTCCAGTGCTTGT-----                                                                  | 24  | 143   |
| -----TGACCCCTAGTCCAGTGCTTGT-----                                                                    | 22  | 121   |
| -----TGACCCCTAGTCCAGTGCTT-----                                                                      | 20  | 35    |
| -----TGACCCCTAGTCCAGTGC-----                                                                        | 18  | 26    |
| -----CTGCTGACCCCTAGTCCAGTG-----                                                                     | 22  | 17    |
| -----CTGACCCCTAGTCCAGTGCTT-----                                                                     | 21  | 12    |
| -----TGACCCCTAGTCCAGTGCTTGTG-----                                                                   | 23  | 11    |
| -----TGACCCCTAGTCCAGTGCTTG-----                                                                     | 21  | 9     |
| -----CTGACCCCTAGTCCAGTGC-----                                                                       | 19  | 9     |
| -----CTGACCCCTAGTCCAGTGCT-----                                                                      | 20  | 8     |
| -----TGACCCCTAGTCCAGTGCT-----                                                                       | 19  | 8     |
| -----TGACCCCTAGTCCAGTGCTTGTGG-----                                                                  | 24  | 5     |
| -----CTGACCCCTAGTCCAGTG-----                                                                        | 18  | 3     |
| -----CTGACCCCTAGTCCAGTGCTTG-----                                                                    | 22  | 2     |
| -----CTGCTGACCCCTAGTCCAG-----                                                                       | 19  | 1     |
| -----CTGCTGACCCCTAGTCCAGTGCT-----                                                                   | 23  | 1     |
| -----CTGCTGACCCCTAGTCCAGTG-----                                                                     | 21  | 1     |

```

-----TTGTGGTGGCTACTGGGCC----- loop 19 3
-----GCTTGTGGTGGCTACTGG----- loop 18 1
-----TTGTGGTGGCTACTGGGC----- loop 18 1
-----CCTGAAGTAGGGGTCTGGAGA----- mirR 21 320
-----CCTGAAGTAGGGGTCTGGAG----- mirR 20 179
-----CCTGAAGTAGGGGTCTGGAGAC----- mirR 22 172
-----CCCTGAAGTAGGGGTCTGGAG----- mirR 21 131
-----CCCTGAAGTAGGGGTCTGGAGA----- mirR 22 95
-----CCCTGAAGTAGGGGTCTGGAGAC----- mirR 23 73
-----GAACTAGGGGTCTGGAGA----- mirR 18 56
-----CCTGAAGTAGGGGTCTGGAGACC----- mirR 23 46
-----CCTGAAGTAGGGGTCTGGGA----- mirR 19 39
-----TGAAGTAGGGGTCTGGAGA----- mirR 19 38
-----GAACTAGGGGTCTGGAGAC----- mirR 19 35
-----TGAAGTAGGGGTCTGGAG----- mirR 18 23
-----CTGAAGTAGGGGTCTGGAGA----- mirR 20 23
-----CCTGAAGTAGGGGTCTGG----- mirR 18 20
-----TGAAGTAGGGGTCTGGAGAC----- mirR 20 15
-----CTGAAGTAGGGGTCTGGAG----- mirR 19 15
-----CCCTGAAGTAGGGGTCTGGGA----- mirR 20 12
-----CCCTGAAGTAGGGGTCTGG----- mirR 19 9
-----CTGAAGTAGGGGTCTGGAGAC----- mirR 21 8
-----CCCTGAAGTAGGGGTCTGGAGACC----- mirR 24 7
-----GAACTAGGGGTCTGGAGACC----- mirR 20 7
-----CTGAAGTAGGGGTCTGGGA----- mirR 18 6
-----CCTGAAGTAGGGGTCTGGAGACCT----- mirR 24 4
-----CCCTGAAGTAGGGGTCTGGAGACCT----- mirR 25 3
-----CTGAAGTAGGGGTCTGGAGACC----- mirR 22 2
-----GCCCTGAAGTAGGGGTCT----- mirR 18 2
-----TGAAGTAGGGGTCTGGAGACC----- mirR 21 1
-----CCTGGGTTTGATCTCCACA morR 19 1
-----ACCTGGGTTTGATCTCCAC- morR 19 1
-----CCTGGGTTTGATCTCCAC- morR 18 1

```

>mmu-mir-744

```

AGCAGCACAGTGGGCTGGGCAAGGTGCGGGGCTAGGGCTAACAGCAGTCTTACTGACGGTTTCTGAAACCACACACATGCTGTTGCCACTAACCTCAACCTTACTCGGTCTGACCGG species len reads
AGCAGCACAGTGGGCTGGGCAA----- morL 22 10
-----CACAGTGGGCTGGGCAAGG----- morL 19 2
-----CACAGTGGGCTGGGCAAGGT----- morL 20 2
-----GCACAGTGGGCTGGGCAAG----- morL 19 2
-----GCACAGTGGGCTGGGCAAG----- morL 20 1
-----CAGTGGGCTGGGCAAGGTGC----- morL 20 1
-----CACAGTGGGCTGGGCAAG----- morL 18 1
-----GCACAGTGGGCTGGGCAAGGT----- morL 21 1
-----TGCGGGGCTAGGGCTAACAGCA----- mirL 22 17877
-----TGCGGGGCTAGGGCTAACAGC----- mirL 21 12981

```

```

-----TGC GGGGCTAGGGCTAACAG----- mirL 20 9562
-----TGC GGGGCTAGGGCTAACAGCAG----- mirL 23 7030
-----TGC GGGGCTAGGGCTAACAA----- mirL 19 1435
-----TGC GGGGCTAGGGCTAAC----- mirL 18 1173
-----TGC GGGGCTAGGGCTAACAGCAGT----- mirL 24 788
-----GCG GGGCTAGGGCTAACAGCA----- mirL 21 320
-----GCG GGGCTAGGGCTAACAGCAG----- mirL 22 183
-----GCG GGGCTAGGGCTAACAGC----- mirL 20 182
-----GCG GGGCTAGGGCTAACAG----- mirL 19 148
-----GCG GGGCTAGGGCTAACAA----- mirL 18 22
-----GTGCGGGGCTAGGGCTAACAGC----- mirL 22 21
-----GCG GGGCTAGGGCTAACAGCAGT----- mirL 23 18
-----GCG GGGCTAGGGCTAACAGCAGTC----- mirL 24 13
-----GTGCGGGGCTAGGGCTAACAG----- mirL 21 11
-----CGGGGCTAGGGCTAACAG----- mirL 18 11
-----GGGGCTAGGGCTAACAGC----- mirL 18 9
-----CGGGGCTAGGGCTAACAGCA----- mirL 20 5
-----GTGCGGGGCTAGGGCTAACAGCA----- mirL 23 4
-----CGGGGCTAGGGCTAACAGC----- mirL 19 4
-----GGGGCTAGGGCTAACAGCA----- mirL 19 4
-----GTGCGGGGCTAGGGCTAACAGCAG----- mirL 24 3
-----GGGGCTAGGGCTAACAGCAG----- mirL 20 3
-----GGTGC GGGGCTAGGGCTAACAG----- mirL 22 1
-----GGGGCTAGGGCTAACAGCAGT----- mirL 21 1
-----GTGCGGGGCTAGGGCTAACAA----- mirL 20 1
-----CTGTTGCCACTAACCTCAACCT----- mirR 22 3678
-----CTGTTGCCACTAACCTCAACC----- mirR 21 1233
-----CTGTTGCCACTAACCTCAAC----- mirR 20 587
-----CTGTTGCCACTAACCTCAA----- mirR 19 400
-----CTGTTGCCACTAACCTCAACCTT----- mirR 23 395
-----CTGTTGCCACTAACCTCA----- mirR 18 200
-----CTGTTGCCACTAACCTCAACCTTA----- mirR 24 89
-----GTTGCCACTAACCTCAACCT----- mirR 20 89
-----TTGCCACTAACCTCAACCT----- mirR 19 86
-----TGTTGCCACTAACCTCAACCT----- mirR 21 69
-----TTGCCACTAACCTCAACC----- mirR 18 17
-----TGTTGCCACTAACCTCAACC----- mirR 20 11
-----GTTGCCACTAACCTCAACCTT----- mirR 21 7
-----GTTGCCACTAACCTCAAC----- mirR 18 7
-----TGTTGCCACTAACCTCAAC----- mirR 19 6
-----TGCTGTTGCCACTAACCTCA----- mirR 20 6
-----ATGCTGTTGCCACTAACCTCA----- mirR 21 6
-----TGCTGTTGCCACTAACCTC----- mirR 19 6
-----TGCTGTTGCCACTAACCTCAA----- mirR 21 5
-----TGTTGCCACTAACCTCAACCTT----- mirR 22 5
-----TTGCCACTAACCTCAACCTT----- mirR 20 4

```

```

-----TGTTGCCACTAACCTCAA----- mirR 18 4
-----ATGCTGTTGCCACTAACCTCAAC----- mirR 23 4
-----GTTGCCACTAACCTCAACC----- mirR 19 4
-----GCTGTTGCCACTAACCTCAACC----- mirR 22 3
-----TGCTGTTGCCACTAACCTCAACC----- mirR 23 2
-----TGTTGCCACTAACCTCAACCTTA----- mirR 23 2
-----TTGCCACTAACCTCAACCTTA----- mirR 21 2
-----TGCTGTTGCCACTAACCTCAACCT----- mirR 24 1
-----ATGCTGTTGCCACTAACCTCAA----- mirR 22 1
-----ATGCTGTTGCCACTAACCTCAAC----- mirR 18 1
-----ATGCTGTTGCCACTAACCTC----- mirR 20 1
-----GCTGTTGCCACTAACCTCAA----- mirR 20 1
-----GCTGTTGCCACTAACCTCAACCT----- mirR 23 1
-----GCTGTTGCCACTAACCTCAAC----- mirR 21 1
-----CTTACTCGGTCCTGACCGG morR 19 1

```

>mmu-mir-99b

```

ACTCCTGGGTCCTGGCACCCACCCGTAGAACCGACCTTGCGGGGCTTCGCCGCACACAAGCTCGTGTCTGTGGGTCCGTGTC species len reads
ACTCCTGGGTCCTGGCAC----- morL 18 1
--CCTGGGTCCTGGCACCCA----- morL 18 1
--TCCTGGGTCCTGGCACCCA----- morL 19 1
-CTCCTGGGTCCTGGCACCCA----- morL 20 1
-CTCCTGGGTCCTGGCACCC----- morL 18 1
-----CACCCGTAGAACCGACCTTGC----- mirL 21 22181
-----CACCCGTAGAACCGACCTTGCG----- mirL 22 8891
-----CACCCGTAGAACCGACCTTGCGG----- mirL 23 7750
-----CACCCGTAGAACCGACCTTG----- mirL 20 5794
-----CACCCGTAGAACCGACCTT----- mirL 19 2593
-----CACCCGTAGAACCGACCT----- mirL 18 2069
-----CACCCGTAGAACCGACCTTGCGGG----- mirL 24 1372
-----ACCCGTAGAACCGACCTTGC----- mirL 20 151
-----ACCCGTAGAACCGACCTTGCGG----- mirL 22 86
-----ACCCGTAGAACCGACCTTGCG----- mirL 21 80
-----ACCCGTAGAACCGACCTTG----- mirL 19 54
-----CCACCCGTAGAACCGACCTTGC----- mirL 22 44
-----ACCCGTAGAACCGACCTT----- mirL 18 30
-----CCCGTAGAACCGACCTTGC----- mirL 19 23
-----CCGTAGAACCGACCTTGC----- mirL 18 16
-----ACCCGTAGAACCGACCTTGCGGG----- mirL 23 16
-----CCACCCGTAGAACCGACCTT----- mirL 20 8
-----CCCGTAGAACCGACCTTGCG----- mirL 20 8
-----CCGTAGAACCGACCTTGCG----- mirL 19 7
-----CCACCCGTAGAACCGACCTTGCGG----- mirL 24 5
-----CCACCCGTAGAACCGACCTTG----- mirL 21 4
-----CCCGTAGAACCGACCTTGCGG----- mirL 21 4
-----CCACCCGTAGAACCGACCT----- mirL 19 3

```

```

-----ACCCGTAGAACCGACCTTGCGGGGC----- mirL 25 2
-----CCCGTAGAACCGACCTTG----- mirL 18 2
-----CCACCCGTAGAACCGACC----- mirL 18 1
-----CCCACCCGTAGAACCGACCTTG----- mirL 22 1
-----CCGTAGAACCGACCTTGCGGGGCC----- mirL 24 1
-----CCACCCGTAGAACCGACCTTGCG----- mirL 23 1
-----CCCACCCGTAGAACCGACC----- mirL 19 1
-----ACCCACCCGTAGAACCGAC----- mirL 19 1
-----CAAGCTCGTGTCTGTGGGTCCGT--- mirR 23 2482
-----CAAGCTCGTGTCTGTGGGTCC----- mirR 20 1242
-----CAAGCTCGTGTCTGTGGGTCC----- mirR 21 1165
-----CAAGCTCGTGTCTGTGGGTCCGTG-- mirR 24 851
-----CAAGCTCGTGTCTGTGGGTCCG--- mirR 22 763
-----CAAGCTCGTGTCTGTGGGTCCGTGT- mirR 25 489
-----CAAGCTCGTGTCTGTGGGT----- mirR 19 286
-----AAGCTCGTGTCTGTGGGTCCGT--- mirR 22 32
-----AGCTCGTGTCTGTGGGTCCG--- mirR 20 31
-----AAGCTCGTGTCTGTGGGTCCG--- mirR 21 28
-----AAGCTCGTGTCTGTGGGTCCGTG-- mirR 23 20
-----AAGCTCGTGTCTGTGGGTCCGTGT- mirR 24 15
-----AAGCTCGTGTCTGTGGGTCC----- mirR 19 13
-----AAGCTCGTGTCTGTGGGTCC----- mirR 20 12
-----AGCTCGTGTCTGTGGGTCC----- mirR 18 9
-----GCTCGTGTCTGTGGGTCC----- mirR 18 8
-----GCTCGTGTCTGTGGGTCCG--- mirR 19 8
-----AGCTCGTGTCTGTGGGTCCGT--- mirR 21 8
-----AGCTCGTGTCTGTGGGTCC----- mirR 19 8
-----ACAAGCTCGTGTCTGTGG----- mirR 18 3
-----ACAAGCTCGTGTCTGTGGGTCCGT--- mirR 24 2
-----ACAAGCTCGTGTCTGTGGGTCCGTG-- mirR 25 2
-----AAGCTCGTGTCTGTGGGTCCGTGTC mirR 25 2
-----CACAAGCTCGTGTCTGTGG----- mirR 19 1
-----GCTCGTGTCTGTGGGTCCGTG-- mirR 21 1
-----ACACAAGCTCGTGTCTGTGGG----- mirR 21 1
-----AGCTCGTGTCTGTGGGTCCGTGT- mirR 23 1
-----ACAAGCTCGTGTCTGTGGGTCC----- mirR 22 1
-----ACACAAGCTCGTGTCTGT----- mirR 18 1

```

>mmu-mir-154

```

CCCACGTGCGGTGCTTGAAGATAGGTTATCCGTGTTGCCTTCGCTTTATTCGTGACGAATCATACACGGTTGACCTATTTT species len reads
--CACGTGCGGTGCTTGAAGA----- morL 19 2
--CACGTGCGGTGCTTGAAGAT----- morL 20 1
CCCACGTGCGGTGCTTGAAGA----- morL 21 1
CCCACGTGCGGTGCTTGA----- morL 18 1
-----TAGGTTATCCGTGTTGCCTTCG----- mirL 22 18632
-----TAGGTTATCCGTGTTGCCTTC----- mirL 21 7498

```

```

-----TAGGTTATCCGTGTTGCCTT----- mirL 20 3689
-----TAGGTTATCCGTGTTGCCTTCGC----- mirL 23 3147
-----TAGGTTATCCGTGTTGCCT----- mirL 19 971
-----TAGGTTATCCGTGTTGCC----- mirL 18 717
-----TAGGTTATCCGTGTTGCCTTCGCT----- mirL 24 524
-----AGGTTATCCGTGTTGCCTTCG----- mirL 21 523
-----AGGTTATCCGTGTTGCCTTC----- mirL 20 131
-----AGGTTATCCGTGTTGCCTTCGC----- mirL 22 96
-----AGGTTATCCGTGTTGCCTT----- mirL 19 75
-----GTTATCCGTGTTGCCTTC----- mirL 18 24
-----AGGTTATCCGTGTTGCCT----- mirL 18 22
-----AGGTTATCCGTGTTGCCTTCGCT----- mirL 23 16
-----GGTTATCCGTGTTGCCTTCG----- mirL 20 9
-----GGTTATCCGTGTTGCCTTC----- mirL 19 8
-----GGTTATCCGTGTTGCCTT----- mirL 18 6
-----GTTATCCGTGTTGCCTTCG----- mirL 19 5
-----ATAGGTTATCCGTGTTGCCTTC----- mirL 22 5
-----ATAGGTTATCCGTGTTGCCTTCG----- mirL 23 3
-----GGTTATCCGTGTTGCCTTCGC----- mirL 21 3
-----GGTTATCCGTGTTGCCTTCGCT----- mirL 22 1
-----AGGTTATCCGTGTTGCCTTCGCTT----- mirL 24 1
-----ATAGGTTATCCGTGTTGCCT----- mirL 20 1
-----ATAGGTTATCCGTGTTGCC----- mirL 19 1
-----ATAGGTTATCCGTGTTGCCTTCGC----- mirL 24 1
-----GTTATCCGTGTTGCCTTCGC----- mirL 20 1
-----AATCATACACGGTTGACCTATT-- mirR 22 15836
-----AATCATACACGGTTGACC----- mirR 18 2728
-----AATCATACACGGTTGACCTAT-- mirR 21 1406
-----AATCATACACGGTTGACCTATTT-- mirR 23 1271
-----AATCATACACGGTTGACCTA-- mirR 20 435
-----AATCATACACGGTTGACCT----- mirR 19 261
-----ATCATACACGGTTGACCTATT-- mirR 21 130
-----AATCATACACGGTTGACCTATTTT mirR 24 94
-----CATACACGGTTGACCTATT-- mirR 19 56
-----TCATACACGGTTGACCTATT-- mirR 20 27
-----GAATCATACACGGTTGACCTATT-- mirR 23 20
-----ATCATACACGGTTGACCTAT-- mirR 20 17
-----ATCATACACGGTTGACCTA-- mirR 19 11
-----CATACACGGTTGACCTAT-- mirR 18 10
-----GAATCATACACGGTTGACCTAT-- mirR 22 10
-----ATCATACACGGTTGACCTATTT-- mirR 22 9
-----CATACACGGTTGACCTATTT-- mirR 20 8
-----GAATCATACACGGTTGACCTA-- mirR 21 6
-----ATCATACACGGTTGACCT----- mirR 18 3
-----TCATACACGGTTGACCTA-- mirR 18 3
-----ACGAATCATACACGGTTGACCT----- mirR 22 2

```



```

-----GAATCATACACGGTTGACC----- mirR 19 2
-----ACGAATCATACACGGTTG----- mirR 18 1
-----ACGAATCATACACGGTTGACC----- mirR 21 1
-----TCATACACGGTTGACCTAT--- mirR 19 1
-----CGAATCATACACGGTTGAC----- mirR 19 1
-----ACGAATCATACACGGTTGACCTATT-- mirR 25 1
-----ACGAATCATACACGGTTGACCTA--- mirR 23 1
-----ACGAATCATACACGGTTGA----- mirR 19 1
-----ATCATACACGGTTGACCTATTTT mirR 23 1
-----TCATACACGGTTGACCTATTT- mirR 21 1

```

>mmu-mir-872

| Species | len | reads |
|---------|-----|-------|
| morL    | 19  | 3     |
| morL    | 18  | 1     |
| morL    | 18  | 1     |
| morL    | 20  | 1     |
| mirL    | 20  | 4644  |
| mirL    | 23  | 2865  |
| mirL    | 22  | 2349  |
| mirL    | 21  | 1522  |
| mirL    | 19  | 1112  |
| mirL    | 24  | 517   |
| mirL    | 18  | 317   |
| mirL    | 19  | 7     |
| mirL    | 18  | 6     |
| mirL    | 22  | 6     |
| mirL    | 21  | 3     |
| mirL    | 23  | 3     |
| mirL    | 19  | 2     |
| mirL    | 18  | 2     |
| mirL    | 20  | 1     |
| loop    | 18  | 1     |
| loop    | 19  | 1     |
| loop    | 19  | 1     |
| loop    | 18  | 1     |
| mirR    | 22  | 27759 |
| mirR    | 23  | 3849  |
| mirR    | 21  | 3653  |
| mirR    | 21  | 1656  |
| mirR    | 20  | 1621  |
| mirR    | 19  | 678   |
| mirR    | 18  | 593   |
| mirR    | 24  | 555   |
| mirR    | 22  | 179   |
| mirR    | 20  | 149   |

```

-----AACTATTGCAGTAGCCTCCT----- mirR 20 108
-----GAACTATTGCAGTAGCCTC----- mirR 19 66
-----CTGAACTATTGCAGTAGCCTCCT----- mirR 23 46
-----ACTATTGCAGTAGCCTCCT----- mirR 19 34
-----CTGAACTATTGCAGTAGCCTCC----- mirR 22 25
-----GAACTATTGCAGTAGCCTCCTAA----- mirR 23 23
-----GAACTATTGCAGTAGCCT----- mirR 18 19
-----ACTATTGCAGTAGCCTCC----- mirR 18 17
-----AACTATTGCAGTAGCCTCC----- mirR 19 16
-----GAACTATTGCAGTAGCCTCCTAAC----- mirR 24 12
-----AACTATTGCAGTAGCCTC----- mirR 18 11
-----AACTATTGCAGTAGCCTCCTA----- mirR 21 10
-----CTGAACTATTGCAGTAGCCTCCTA----- mirR 24 9
-----CTGAACTATTGCAGTAGCCTC----- mirR 21 8
-----CTGAACTATTGCAGTAGCCT----- mirR 20 6
-----CTGAACTATTGCAGTAGC----- mirR 18 4
-----ACTATTGCAGTAGCCTCCTA----- mirR 20 3
-----CTGAACTATTGCAGTAGCC----- mirR 19 2
-----GCCTGAACTATTGCAGTAGCCTCCT----- mirR 25 1
-----AACTATTGCAGTAGCCTCCTAA----- mirR 22 1
-----CTGGTTATCCCACCTCCA morR 18 1

```

>mmu-mir-323

```

TGCTGCTTGGTACTTGGAGAGAGGTGGTCCGTGGCGCGTTTCGCTTCATTATGGCGCACATTACACGGTCGACCTCTTGCGGTATCTAATCCC GCCTT species len reads
--CTGCTTGGTACTTGGAGA----- morL 18 4
----CTTGGTACTTGGAGAGAG----- morL 18 1
-GCTGCTTGGTACTTGGAGAG----- morL 20 1
TGCTGCTTGGTACTTGGAG----- morL 18 1
-----AGGTGGTCCGTGGCGCGTTTCGC----- mirL 22 1084
-----AGGTGGTCCGTGGCGCGTTTCG----- mirL 21 602
-----AGGTGGTCCGTGGCGCGTTTC----- mirL 20 250
-----AGGTGGTCCGTGGCGCGTT----- mirL 19 134
-----AGGTGGTCCGTGGCGCGTTTCGCT----- mirL 23 59
-----TGGTCCGTGGCGCGTTTCGC----- mirL 19 28
-----AGGTGGTCCGTGGCGCGTT----- mirL 18 16
-----AGGTGGTCCGTGGCGCGTTTCGCTTC----- mirL 25 15
-----GGTGGTCCGTGGCGCGTTTCGC----- mirL 21 8
-----TGGTCCGTGGCGCGTTTCG----- mirL 18 5
-----GTGGTCCGTGGCGCGTTTCGC----- mirL 20 5
-----GTGGTCCGTGGCGCGTTTC----- mirL 18 4
-----GGTGGTCCGTGGCGCGTTTC----- mirL 19 2
-----GTGGTCCGTGGCGCGTTTCG----- mirL 19 2
-----GAGGTGGTCCGTGGCGCGTTTCGC----- mirL 23 1
-----TGGTCCGTGGCGCGTTTCGCT----- mirL 20 1
-----AGAGGTGGTCCGTGGCGC----- mirL 18 1
-----GCACATTACACGGTCGACCTCT----- mirR 22 25468

```

```

-----CACATTACACGGTCGACCTCT----- mirR 21 13333
-----GCACATTACACGGTCGACCTC----- mirR 21 3584
-----GCACATTACACGGTCGACCTCTT----- mirR 23 2406
-----CACATTACACGGTCGACCTCTT----- mirR 22 1749
-----CACATTACACGGTCGACCTC----- mirR 20 1366
-----GCACATTACACGGTCGACCT----- mirR 20 1067
-----CACATTACACGGTCGACCT----- mirR 19 790
-----GCACATTACACGGTCGACC----- mirR 19 776
-----GCACATTACACGGTCGAC----- mirR 18 517
-----GCACATTACACGGTCGACCTCTT----- mirR 24 221
-----CACATTACACGGTCGACC----- mirR 18 198
-----CACATTACACGGTCGACCTCTT----- mirR 23 192
-----ACATTACACGGTCGACCTCT----- mirR 20 123
-----CATTACACGGTCGACCTCT----- mirR 19 92
-----CGCACATTACACGGTCGACCTC----- mirR 22 58
-----CGCACATTACACGGTCGACCTCT----- mirR 23 57
-----ACATTACACGGTCGACCTC----- mirR 19 29
-----CATTACACGGTCGACCTC----- mirR 18 21
-----CACATTACACGGTCGACCTCTTTG----- mirR 24 18
-----ACATTACACGGTCGACCT----- mirR 18 17
-----ACATTACACGGTCGACCTCTT----- mirR 21 15
-----CGCACATTACACGGTCGACCT----- mirR 21 13
-----CATTACACGGTCGACCTCTT----- mirR 20 12
-----CGCACATTACACGGTCGACC----- mirR 20 10
-----CGCACATTACACGGTCGACCTCTT----- mirR 24 7
-----ACATTACACGGTCGACCTCTTT----- mirR 22 3
-----CGCACATTACACGGTCGAC----- mirR 19 3
-----GCGCACATTACACGGTCGACCTCT----- mirR 24 2
-----GCGCACATTACACGGTCGACC----- mirR 21 1
-----ACATTACACGGTCGACCTCTTTG----- mirR 23 1
-----CGCACATTACACGGTCGA----- mirR 18 1
-----GGCGCACATTACACGGTCGA----- mirR 20 1
-----CATTACACGGTCGACCTCTTT----- mirR 21 1
-----GCGCACATTACACGGTCGACCTC----- mirR 23 1
-----GCGGTATCTAATCCCGCCTT morR 20 1

```

>mmu-mir-411

```

CTCTGTGTGGTACTTGGAGAGATAGTAGACCGTATAGCGTACGCTTTATCTGTGACGTATGTAACACGGTCCACTAACCCCTCAGTATCAAATCCATCCCCG species len reads
CTCTGTGTGGTACTTGGAG----- morL 19 2
CTCTGTGTGGTACTTGGAGAGA----- morL 22 1
-----TGTGGTACTTGGAGAGATA----- morL 19 1
--CTGTGTGGTACTTGGAGAGA----- morL 20 1
CTCTGTGTGGTACTTGGAG----- morL 18 1
-TCTGTGTGGTACTTGGAG----- morL 18 1
-----ATAGTAGACCGTATAGCGTAC----- mirL 21 6435
-----ATAGTAGACCGTATAGCGTACGC----- mirL 23 5914

```

|                                     |      |    |      |
|-------------------------------------|------|----|------|
| -----TAGTAGACCGTATAGCGTACGC-----    | mirL | 22 | 5878 |
| -----TAGTAGACCGTATAGCGTAC-----      | mirL | 20 | 4188 |
| -----ATAGTAGACCGTATAGCGTACG-----    | mirL | 22 | 3328 |
| -----TAGTAGACCGTATAGCGTACG-----     | mirL | 21 | 2964 |
| -----ATAGTAGACCGTATAGCGTA-----      | mirL | 20 | 773  |
| -----TAGTAGACCGTATAGCGTA-----       | mirL | 19 | 768  |
| -----ATAGTAGACCGTATAGCGT-----       | mirL | 19 | 671  |
| -----AGTAGACCGTATAGCGTACGC-----     | mirL | 21 | 575  |
| -----TAGTAGACCGTATAGCGT-----        | mirL | 18 | 376  |
| -----AGTAGACCGTATAGCGTAC-----       | mirL | 19 | 363  |
| -----AGTAGACCGTATAGCGTACG-----      | mirL | 20 | 273  |
| -----TAGTAGACCGTATAGCGTACGCT-----   | mirL | 23 | 268  |
| -----ATAGTAGACCGTATAGCGTACGCT-----  | mirL | 24 | 233  |
| -----AGTAGACCGTATAGCGTACGCT-----    | mirL | 22 | 149  |
| -----ATAGTAGACCGTATAGCG-----        | mirL | 18 | 146  |
| -----AGTAGACCGTATAGCGTA-----        | mirL | 18 | 60   |
| -----TAGTAGACCGTATAGCGTACGCTT-----  | mirL | 24 | 26   |
| -----GTAGACCGTATAGCGTACG-----       | mirL | 19 | 23   |
| -----GTAGACCGTATAGCGTAC-----        | mirL | 18 | 20   |
| -----GTAGACCGTATAGCGTACGC-----      | mirL | 20 | 14   |
| -----AGTAGACCGTATAGCGTACGCTT-----   | mirL | 23 | 10   |
| -----GATAGTAGACCGTATAGCGTAC-----    | mirL | 22 | 9    |
| -----AGTAGACCGTATAGCGTACGCTTT-----  | mirL | 24 | 5    |
| -----GATAGTAGACCGTATAGCGTACGC-----  | mirL | 24 | 1    |
| -----GATAGTAGACCGTATAGCGTA-----     | mirL | 21 | 1    |
| -----GATAGTAGACCGTATAGCGT-----      | mirL | 20 | 1    |
| -----GATAGTAGACCGTATAGCGTACG-----   | mirL | 23 | 1    |
| -----GAGATAGTAGACCGTATAG-----       | mirL | 19 | 1    |
| -----GTAGACCGTATAGCGTACGCT-----     | mirL | 21 | 1    |
| -----GATAGTAGACCGTATAGC-----        | mirL | 18 | 1    |
| -----GAGATAGTAGACCGTATAGC-----      | mirL | 20 | 1    |
| -----TATGTAACACGGTCCACTAA-----      | mirR | 20 | 7357 |
| -----TATGTAACACGGTCCACTAAC-----     | mirR | 21 | 5045 |
| -----TATGTAACACGGTCCACTA-----       | mirR | 19 | 2641 |
| -----TATGTAACACGGTCCACTAACCC-----   | mirR | 22 | 2154 |
| -----TATGTAACACGGTCCACTAACCC-----   | mirR | 23 | 776  |
| -----TATGTAACACGGTCCACT-----        | mirR | 18 | 771  |
| -----ATGTAACACGGTCCACTAA-----       | mirR | 19 | 451  |
| -----ATGTAACACGGTCCACTAAC-----      | mirR | 20 | 257  |
| -----ATGTAACACGGTCCACTA-----        | mirR | 18 | 181  |
| -----ATGTAACACGGTCCACTAACCC-----    | mirR | 21 | 108  |
| -----TATGTAACACGGTCCACTAACCCCT----- | mirR | 24 | 61   |
| -----ATGTAACACGGTCCACTAACCC-----    | mirR | 22 | 34   |
| -----TGTAACACGGTCCACTAA-----        | mirR | 18 | 28   |
| -----GTATGTAACACGGTCCACTAA-----     | mirR | 21 | 24   |
| -----CGTATGTAACACGGTCCACTA-----     | mirR | 21 | 19   |

```

-----CGTATGTAACACGGTCCACTAA----- mirR 22 19
-----GTAACACGGTCCACTAAC----- mirR 18 16
-----CGTATGTAACACGGTCCACT----- mirR 20 16
-----GTATGTAACACGGTCCACTAAC----- mirR 22 9
-----CGTATGTAACACGGTCCAC----- mirR 19 8
-----ATGTAACACGGTCCACTAACCCCT----- mirR 23 6
-----GTATGTAACACGGTCCACTA----- mirR 20 4
-----TGTAACACGGTCCACTAAC----- mirR 19 3
-----GTAACACGGTCCACTAACCC----- mirR 20 3
-----GTAACACGGTCCACTAACCC----- mirR 19 3
-----TGTAACACGGTCCACTAACCC----- mirR 20 2
-----TGTAACACGGTCCACTAACCCCTC----- mirR 23 2
-----GTATGTAACACGGTCCACTAACCC----- mirR 23 2
-----CGTATGTAACACGGTCCACTAAC----- mirR 23 2
-----GTATGTAACACGGTCCAC----- mirR 18 2
-----TGTAACACGGTCCACTAACCC----- mirR 21 2
-----ATGTAACACGGTCCACTAACCCCTC----- mirR 24 1
-----GTATGTAACACGGTCCACTAACCC----- mirR 24 1
-----TCAGTATCAAATCCATCCCCG morR 21 1

```

>mmu-mir-93

```

ACCTTAGTCATGGGGGCTCCAAAGTCTGTTTCGTGCAGGTAGTGAATTACCTGACCTACTGCTGAGCTAGCACTTCCCAGCCCCAGGACACAA species len reads
ACCTTAGTCATGGGGGCTC----- morL 19 2
-----CAAAGTCTGTTTCGTGCAGGTAG----- mirL 23 20079
-----CAAAGTCTGTTTCGTGCAGGTA----- mirL 22 15032
-----CAAAGTCTGTTTCGTGCAGGTAGT----- mirL 24 2751
-----CAAAGTCTGTTTCGTGCAGGT----- mirL 21 2025
-----AAAGTCTGTTTCGTGCAGGTAG----- mirL 22 1690
-----CAAAGTCTGTTTCGTGCAGGTAGT----- mirL 25 1277
-----CAAAGTCTGTTTCGTGCAG----- mirL 19 864
-----CAAAGTCTGTTTCGTGCAGG----- mirL 20 641
-----AAAGTCTGTTTCGTGCAGGTA----- mirL 21 296
-----AGTCTGTTTCGTGCAGGTAG----- mirL 20 131
-----AAAGTCTGTTTCGTGCAGGTAGT----- mirL 23 130
-----AAGTCTGTTTCGTGCAGGTAG----- mirL 21 102
-----AAAGTCTGTTTCGTGCAGGT----- mirL 20 83
-----AGTCTGTTTCGTGCAGGTA----- mirL 19 60
-----AAAGTCTGTTTCGTGCAG----- mirL 18 33
-----AAGTCTGTTTCGTGCAGGTA----- mirL 20 33
-----AAAGTCTGTTTCGTGCAGG----- mirL 19 13
-----AGTCTGTTTCGTGCAGGT----- mirL 18 12
-----AGTCTGTTTCGTGCAGGTAGT----- mirL 21 11
-----AAAGTCTGTTTCGTGCAGGTAGT----- mirL 24 9
-----AAGTCTGTTTCGTGCAGGTAGT----- mirL 22 7
-----CCAAAGTCTGTTTCGTGCAGGTAG----- mirL 24 5
-----AAGTCTGTTTCGTGCAGGT----- mirL 19 5

```

```

-----CCAAAGTGCTGTTTCGTGCAGGTA----- mirL 23 2
-----CCAAAGTGCTGTTTCGTGCAGG----- mirL 21 1
-----TCCAAAGTGCTGTTTCGTGCAGGTAG----- mirL 25 1
-----CCAAAGTGCTGTTTCGTGCAG----- mirL 20 1
-----AAGTGCTGTTTCGTGCAGGTAGTG----- mirL 23 1
-----AAGTGCTGTTTCGTGCAGGTAGTGT----- mirL 24 1
-----CCAAAGTGCTGTTTCGTGCAGGTAGT----- mirL 25 1
-----ACTGCTGAGCTAGCACTTCCCGA----- mirR 23 2874
-----ACTGCTGAGCTAGCACTTCCCG----- mirR 22 2075
-----ACTGCTGAGCTAGCACTTCCC----- mirR 21 914
-----ACTGCTGAGCTAGCACTTCC----- mirR 20 738
-----ACTGCTGAGCTAGCACTTCCCGAG----- mirR 24 421
-----ACTGCTGAGCTAGCACTTC----- mirR 19 218
-----ACTGCTGAGCTAGCACTT----- mirR 18 75
-----GCTGAGCTAGCACTTCCCG----- mirR 19 31
-----CTGCTGAGCTAGCACTTCCCGA----- mirR 22 24
-----CTGCTGAGCTAGCACTTCCCG----- mirR 21 20
-----CTGCTGAGCTAGCACTTCC----- mirR 19 8
-----GCTGAGCTAGCACTTCCC----- mirR 18 7
-----CTGCTGAGCTAGCACTTCCCGAG----- mirR 23 7
-----CTACTGCTGAGCTAGCACTTCC----- mirR 22 5
-----CTACTGCTGAGCTAGCACTTCCC----- mirR 23 4
-----GCTGAGCTAGCACTTCCCGAG----- mirR 21 3
-----TGCTGAGCTAGCACTTCC----- mirR 18 3
-----TACTGCTGAGCTAGCACTTCCCG----- mirR 23 2
-----TGCTGAGCTAGCACTTCCCG----- mirR 20 2
-----TACTGCTGAGCTAGCACTTCC----- mirR 21 2
-----GCTGAGCTAGCACTTCCCGA----- mirR 20 2
-----CTGCTGAGCTAGCACTTCCCGAGC----- mirR 24 2
-----TACTGCTGAGCTAGCACTTCCCGA----- mirR 24 2
-----CTGCTGAGCTAGCACTTCCCGAGCC----- mirR 25 2
-----TACTGCTGAGCTAGCACTTCCCGAG----- mirR 25 2
-----CTGCTGAGCTAGCACTTC----- mirR 18 2
-----TACTGCTGAGCTAGCACTTCCC----- mirR 22 2
-----TACTGCTGAGCTAGCACTTC----- mirR 20 1
-----CTACTGCTGAGCTAGCACT----- mirR 19 1
-----TGCTGAGCTAGCACTTCCC----- mirR 19 1
-----CGAGCCCCCAGGACACAA morR 18 1

>mmu-mir-320
CGGTGCCTCGCCGCCCTCCGCCTTCTCTTCCCGGTTCTTCCCGAGTCGGGAAAAGCTGGGTTGAGAGGGCGAAAAGGATGTGGGAGGTGGA species len reads
CGGTGCCTCGCCGCCCTC----- morL 18 1
-----TCCGCCTTCTTCCCGGTTCT----- mirL 22 7
-----CCTCCGCCTTCTTCCC----- mirL 18 2
-----TCCGCCTTCTTCCCGGTTCT----- mirL 21 2
-----GCCTTCTTCCCGGTTCTTCCC----- mirL 23 2

```

```

-----CTCCGCCTTCTCTTCCCGG----- mirL 19 2
-----TCCGCCTTCTCTTCCCGG----- mirL 18 1
-----TCCGCCTTCTCTTCCCGGTT----- mirL 20 1
-----GCCTTCTCTTCCCGGTT----- mirL 19 1
-----TCCGCCTTCTCTTCCCGGTTCTTC----- mirL 25 1
-----GCCTTCTCTTCCCGGTTCTTCC----- mirL 22 1
-----GCCTTCTCTTCCCGGTTCTTC----- mirL 21 1
-----CGCTTCTCTTCCCGGTT----- mirL 18 1
-----CCCTCCGCCTTCTCTTCCC----- mirL 19 1
-----GCCTTCTCTTCCCGGTT----- mirL 18 1
-----AAAAGCTGGGTTGAGAGGGCGA----- mirR 22 20988
-----AAAAGCTGGGTTGAGAGGGCGAA----- mirR 23 11923
-----AAAAGCTGGGTTGAGAGGGCGAAA----- mirR 24 5094
-----AAAAGCTGGGTTGAGAGGGC----- mirR 20 4572
-----AAAAGCTGGGTTGAGAGGGCG----- mirR 21 2190
-----AAAAGCTGGGTTGAGAGG----- mirR 18 1647
-----AAAAGCTGGGTTGAGAGGG----- mirR 19 1626
-----AAAGCTGGGTTGAGAGGGCGA----- mirR 21 950
-----AAAGCTGGGTTGAGAGGGCGAA----- mirR 22 772
-----AAAGCTGGGTTGAGAGGGCGAAA----- mirR 23 507
-----AAGCTGGGTTGAGAGGGCGAAA----- mirR 22 262
-----AAAGCTGGGTTGAGAGGGC----- mirR 19 250
-----AAGCTGGGTTGAGAGGGCGAA----- mirR 21 233
-----GAAAAGCTGGGTTGAGAGGGCGA----- mirR 23 223
-----AAGCTGGGTTGAGAGGGCGA----- mirR 20 198
-----AAAGCTGGGTTGAGAGGGCGAAAA----- mirR 24 106
-----AAAGCTGGGTTGAGAGGGCG----- mirR 20 86
-----AGCTGGGTTGAGAGGGCGA----- mirR 19 82
-----AAAGCTGGGTTGAGAGGG----- mirR 18 80
-----AAGCTGGGTTGAGAGGGCGAAAA----- mirR 23 63
-----AGCTGGGTTGAGAGGGCGAA----- mirR 20 56
-----AAGCTGGGTTGAGAGGGC----- mirR 18 49
-----GAAAAGCTGGGTTGAGAGGGCGAA----- mirR 24 45
-----GAAAAGCTGGGTTGAGAGGGC----- mirR 21 44
-----GAAAAGCTGGGTTGAGAGGGCG----- mirR 22 34
-----AAGCTGGGTTGAGAGGGCG----- mirR 19 30
-----GAAAAGCTGGGTTGAGAGG----- mirR 19 29
-----GAAAAGCTGGGTTGAGAG----- mirR 18 28
-----GAAAAGCTGGGTTGAGAGGG----- mirR 20 22
-----AGCTGGGTTGAGAGGGCG----- mirR 18 16
-----AAGCTGGGTTGAGAGGGCGAAAA----- mirR 24 15
-----AGCTGGGTTGAGAGGGCGAAA----- mirR 21 9
-----AAGGATGTGGGAGGTGGA morR 18 2
-----GAAAAAGGATGTGGGAGGT--- morR 19 1

```

>mmu-mir-17

|                                                                                                     | species | len | reads |
|-----------------------------------------------------------------------------------------------------|---------|-----|-------|
| CTGTGACCAGTCAGAATAATGTCAAAGTGCTTACAGTGCAGGTAGTGATGTGTGCATCTACTGCAGTGAGGGCACTTGTAGCATTATGCTGACAGCTGC | morL    | 18  | 5     |
| --GTGACCAGTCAGAATAAT-----                                                                           | morL    | 19  | 5     |
| -TGTGACCAGTCAGAATAAT-----                                                                           | morL    | 19  | 2     |
| --GTGACCAGTCAGAATAATG-----                                                                          | morL    | 18  | 1     |
| -----CCAGTCAGAATAATGTCA-----                                                                        | morL    | 18  | 1     |
| -TGTGACCAGTCAGAATAA-----                                                                            | morL    | 19  | 1     |
| CTGTGACCAGTCAGAATAA-----                                                                            | mirL    | 23  | 19679 |
| -----CAAAGTGCTTACAGTGCAGGTAG-----                                                                   | mirL    | 22  | 8773  |
| -----CAAAGTGCTTACAGTGCAGGTA-----                                                                    | mirL    | 21  | 6411  |
| -----CAAAGTGCTTACAGTGCAGGT-----                                                                     | mirL    | 24  | 4303  |
| -----CAAAGTGCTTACAGTGCAGGTAGT-----                                                                  | mirL    | 19  | 1455  |
| -----CAAAGTGCTTACAGTGCAG-----                                                                       | mirL    | 25  | 1036  |
| -----CAAAGTGCTTACAGTGCAGGTAGTG-----                                                                 | mirL    | 20  | 868   |
| -----CAAAGTGCTTACAGTGCAGG-----                                                                      | mirL    | 22  | 673   |
| -----TCAAAGTGCTTACAGTGCAGGT-----                                                                    | mirL    | 23  | 344   |
| -----TCAAAGTGCTTACAGTGCAGGTA-----                                                                   | mirL    | 24  | 257   |
| -----TCAAAGTGCTTACAGTGCAGGTAG-----                                                                  | mirL    | 20  | 248   |
| -----AGTGCTTACAGTGCAGGTAG-----                                                                      | mirL    | 22  | 190   |
| -----AAAGTGCTTACAGTGCAGGTAG-----                                                                    | mirL    | 21  | 178   |
| -----AAGTGCTTACAGTGCAGGTAG-----                                                                     | mirL    | 21  | 110   |
| -----TCAAAGTGCTTACAGTGCAGG-----                                                                     | mirL    | 25  | 59    |
| -----TCAAAGTGCTTACAGTGCAGGTAGT-----                                                                 | mirL    | 20  | 54    |
| -----TCAAAGTGCTTACAGTGCAG-----                                                                      | mirL    | 19  | 45    |
| -----AGTGCTTACAGTGCAGGTA-----                                                                       | mirL    | 22  | 43    |
| -----AAGTGCTTACAGTGCAGGTAGT-----                                                                    | mirL    | 23  | 37    |
| -----AAAGTGCTTACAGTGCAGGTAGT-----                                                                   | mirL    | 21  | 35    |
| -----AGTGCTTACAGTGCAGGTAGT-----                                                                     | mirL    | 18  | 24    |
| -----AGTGCTTACAGTGCAGGT-----                                                                        | mirL    | 18  | 23    |
| -----TCAAAGTGCTTACAGTGC-----                                                                        | mirL    | 18  | 22    |
| -----AAAGTGCTTACAGTGCAG-----                                                                        | mirL    | 21  | 22    |
| -----AAAGTGCTTACAGTGCAGGTA-----                                                                     | mirL    | 20  | 21    |
| -----AAGTGCTTACAGTGCAGGTA-----                                                                      | mirL    | 20  | 13    |
| -----AAAGTGCTTACAGTGCAGGT-----                                                                      | mirL    | 22  | 9     |
| -----AGTGCTTACAGTGCAGGTAGTG-----                                                                    | mirL    | 19  | 5     |
| -----AAGTGCTTACAGTGCAGGT-----                                                                       | mirL    | 19  | 4     |
| -----AAAGTGCTTACAGTGCAGG-----                                                                       | mirL    | 18  | 1     |
| -----AAGTGCTTACAGTGCAGG-----                                                                        | loop    | 19  | 18    |
| -----AGTGATGTGTGCATCTACT-----                                                                       | loop    | 18  | 2     |
| -----AGTGATGTGTGCATCTAC-----                                                                        | mirR    | 20  | 2469  |
| -----ACTGCAGTGAGGGCACTTGT-----                                                                      | mirR    | 22  | 1964  |
| -----ACTGCAGTGAGGGCACTTGTAG-----                                                                    | mirR    | 19  | 798   |
| -----ACTGCAGTGAGGGCACTTG-----                                                                       | mirR    | 21  | 565   |
| -----ACTGCAGTGAGGGCACTTGTA-----                                                                     | mirR    | 23  | 350   |
| -----ACTGCAGTGAGGGCACTTGTAGC-----                                                                   | mirR    | 18  | 182   |
| -----ACTGCAGTGAGGGCACTT-----                                                                        | mirR    | 21  | 67    |
| -----CTGCAGTGAGGGCACTTGTAG-----                                                                     |         |     |       |



```

-----CTGCAGTGAGGGCACTTGT----- mirR 19 43
-----GCAGTGAGGGCACTTGTAG----- mirR 19 28
-----ACTGCAGTGAGGGCACTTGTAGCA----- mirR 24 25
-----TGCAGTGAGGGCACTTGT----- mirR 18 24
-----CTGCAGTGAGGGCACTTGT----- mirR 18 21
-----CTGCAGTGAGGGCACTTGTAG----- mirR 20 12
-----TGCAGTGAGGGCACTTGTAG----- mirR 19 9
-----CTGCAGTGAGGGCACTTGTAGC----- mirR 22 7
-----GCAGTGAGGGCACTTGTAG----- mirR 18 6
-----TGCAGTGAGGGCACTTGTAG----- mirR 20 4
-----TACTGCAGTGAGGGCACTTGT----- mirR 21 2
-----TACTGCAGTGAGGGCACTTGTAG----- mirR 23 1
-----TACTGCAGTGAGGGCACTTGTAGC----- mirR 24 1
-----GCAGTGAGGGCACTTGTAGC----- mirR 20 1
-----TACTGCAGTGAGGGCACTTGT----- mirR 20 1
-----GTAGCATTATGCTGACAGC--- morR 19 1
-----TGTAGCATTATGCTGACA---- morR 18 1
-----TAGCATTATGCTGACAGC--- morR 18 1
-----GCATTATGCTGACAGCTGC morR 19 1

```

>mmu-mir-27a

| TCATGACA | ACTGGCCTGAGGAGCAGGGCTTAGCTGCTTGTGAGCAAGGTCCACAGCAAAGTCGTGTTACAGTGGCTAAGTTCGCCCCCTGGACCCCATCTCCTCAGGCCGCTGCTGCC | species                      | len       | reads       |
|----------|----------------------------------------------------------------------------------------------------------------|------------------------------|-----------|-------------|
| ---      | GACA                                                                                                           | ACTGGCCTGAGGAGC              | ---       | morL 19 8   |
| ---      | ACA                                                                                                            | ACTGGCCTGAGGAGC              | ---       | morL 18 5   |
| ---      | ACA                                                                                                            | ACTGGCCTGAGGAGCA             | ---       | morL 19 2   |
| --       | ATGACA                                                                                                         | ACTGGCCTGAGGAGC              | ---       | morL 21 2   |
| ---      | GACA                                                                                                           | ACTGGCCTGAGGAG               | ---       | morL 18 2   |
| ---      | GACA                                                                                                           | ACTGGCCTGAGGAGCA             | ---       | morL 20 1   |
| ---      | CA                                                                                                             | ACTGGCCTGAGGAGCA             | ---       | morL 18 1   |
| TCATGACA | ACTGGCCTGAGGAGC                                                                                                | ---                          | morL 23 1 |             |
| ---      | ACA                                                                                                            | ACTGGCCTGAGGAGCAG            | ---       | morL 20 1   |
| ---      | A                                                                                                              | ACTGGCCTGAGGAGCAG            | ---       | morL 18 1   |
| ---      | ACT                                                                                                            | GGCCTGAGGAGCAGG              | ---       | morL 18 1   |
| ---      | AGG                                                                                                            | GCTTAGCTGCTTGTGAGCA          | ---       | mirL 22 100 |
| ---      | AGG                                                                                                            | GCTTAGCTGCTTGTGAGCAA         | ---       | mirL 23 48  |
| ---      | AGG                                                                                                            | GCTTAGCTGCTTGTGAGC           | ---       | mirL 21 21  |
| ---      | AGG                                                                                                            | GCTTAGCTGCTTGTGA             | ---       | mirL 19 15  |
| ---      | AGG                                                                                                            | GCTTAGCTGCTTGTG              | ---       | mirL 18 8   |
| ---      | AGG                                                                                                            | GCTTAGCTGCTTGTGAG            | ---       | mirL 20 2   |
| ---      | G                                                                                                              | GCTTAGCTGCTTGTGAGC           | ---       | mirL 19 1   |
| ---      | GG                                                                                                             | GCTTAGCTGCTTGTGAGCAA         | ---       | mirL 22 1   |
| ---      | GG                                                                                                             | GCTTAGCTGCTTGTGAGC           | ---       | mirL 20 1   |
| ---      | AGG                                                                                                            | GCTTAGCTGCTTGTGAGCAAGGTCCACA | ---       | mirL 31 1   |
| ---      | AGG                                                                                                            | TCCACAGCAAAGTCGTG            | ---       | loop 21 4   |
| ---      | AGG                                                                                                            | TCCACAGCAAAGTCGTG            | ---       | loop 20 3   |
| ---      | A                                                                                                              | AGGTCACAGCAAAGTC             | ---       | loop 18 2   |

```

-----GGTCCACAGCAAAGTCGTG----- loop 19 1
-----TCCACAGCAAAGTCGTGT----- loop 18 1
-----GGTCCACAGCAAAGTCGTGTT----- loop 21 1
-----TTCACAGTGGCTAAGTTCGGC----- mirR 21 14013
-----TTCACAGTGGCTAAGTTCGG----- mirR 20 13157
-----TTCACAGTGGCTAAGTTCGGCC----- mirR 22 6884
-----TTCACAGTGGCTAAGTTCGGCCC----- mirR 23 6772
-----TTCACAGTGGCTAAGTTC----- mirR 19 5301
-----TTCACAGTGGCTAAGTTCGGCCCC----- mirR 24 1421
-----TCACAGTGGCTAAGTTCGG----- mirR 19 665
-----TCACAGTGGCTAAGTTCGGC----- mirR 20 656
-----TCACAGTGGCTAAGTTCGGCCC----- mirR 22 545
-----TTCACAGTGGCTAAGTTCGGCCCC----- mirR 25 488
-----TCACAGTGGCTAAGTTCGGCC----- mirR 21 406
-----TCACAGTGGCTAAGTTC----- mirR 18 236
-----TCACAGTGGCTAAGTTCGGCCCC----- mirR 23 169
-----GTTTACAGTGGCTAAGTTCGGC----- mirR 22 138
-----GTTTACAGTGGCTAAGTTCGG----- mirR 21 134
-----GTTTACAGTGGCTAAGTTC----- mirR 20 74
-----GTTTACAGTGGCTAAGTTCGGCC----- mirR 23 56
-----TCACAGTGGCTAAGTTCGGCCCC----- mirR 24 45
-----CACAGTGGCTAAGTTCGG----- mirR 18 21
-----ACAGTGGCTAAGTTCGGC----- mirR 18 19
-----GTTTACAGTGGCTAAGTTCGGCCC----- mirR 24 9
-----CACAGTGGCTAAGTTCGGC----- mirR 19 7
-----CACAGTGGCTAAGTTCGGCCC----- mirR 21 5
-----GTTTACAGTGGCTAAGTTCGGCCCC----- mirR 25 4
-----ACAGTGGCTAAGTTCGGCC----- mirR 19 3
-----TGTTTACAGTGGCTAAGTTCGG----- mirR 22 3
-----ACAGTGGCTAAGTTCGGCCC----- mirR 20 2
-----CACAGTGGCTAAGTTCGGCC----- mirR 20 2
-----CACAGTGGCTAAGTTCGGCCCC----- mirR 22 1
-----GTTTACAGTGGCTAAGTTCGGCCCC----- mirR 26 1
-----CCCCTGGACCCCATCTCCTCAGGC----- morR 24 2
-----CCCCTGGACCCCATCTCCTCAGGCC----- morR 25 2
-----GCCCCCTGGACCCCATCT----- morR 18 2
-----CCCCTGGACCCCATCTCCTCAGG----- morR 23 1
-----CCCCTGGACCCCATCTCCTCAG----- morR 22 1
-----CCCCTGGACCCCATCTCCTCAGGCCGCTGCTGCC morR 35 1
-----CCCCTGGACCCCATCTC----- morR 18 1
-----CCTGGACCCCATCTCCTCA----- morR 19 1
-----CTGGACCCCATCTCCTCA----- morR 18 1

```

```

>mmu-mir-19b-1
AGCACTGGTCTATGGTTAGTTTTGCAGGTTTGCATCCAGCTGTATAATATTCTGCTGTGCAAATCCATGCAAACTGAC species len reads
AGCACTGGTCTATGGTTAG----- morL 19 1

```

```

-----AGTTTTGCAGGTTTGCATCCAG----- mirL 22 2203
-----AGTTTTGCAGGTTTGCATCCA----- mirL 21 433
-----AGTTTTGCAGGTTTGCATCCAGC----- mirL 23 382
-----AGTTTTGCAGGTTTGCATCC----- mirL 20 159
-----AGTTTTGCAGGTTTGCATCCAGCT----- mirL 24 58
-----GTTTTGCAGGTTTGCATCCAG----- mirL 21 36
-----AGTTTTGCAGGTTTGCATC----- mirL 19 20
-----GTTTTGCAGGTTTGCATCCAGCT----- mirL 23 6
-----GTTTTGCAGGTTTGCATCCAGC----- mirL 22 5
-----TTTGCAGGTTTGCATCCAG----- mirL 19 5
-----AGTTTTGCAGGTTTGCATCCAGCTG----- mirL 25 4
-----TTTTGCAGGTTTGCATCCAG----- mirL 20 3
-----GTTTTGCAGGTTTGCATCCA----- mirL 20 2
-----TTTGCAGGTTTGCATCCA----- mirL 18 1
-----TAGTTTTGCAGGTTTGCATCCAG----- mirL 23 1
-----TTTTGCAGGTTTGCATCCAG----- mirL 20 1
-----TGTATAATATTCTGCTGT----- loop 18 1
-----TGTGCAAATCCATGCAAAACTGA----- mirR 23 16190
-----TGTGCAAATCCATGCAAAACTG----- mirR 22 13178
-----TGTGCAAATCCATGCAAAACT----- mirR 21 7922
-----TGTGCAAATCCATGCAAAACTGAC----- mirR 24 5228
-----TGTGCAAATCCATGCAAAAC----- mirR 20 2340
-----TGTGCAAATCCATGCAAAA----- mirR 19 936
-----GTGCAAATCCATGCAAAACTGA----- mirR 22 570
-----GTGCAAATCCATGCAAAACTG----- mirR 21 439
-----GTGCAAATCCATGCAAAACT----- mirR 20 218
-----TGTGCAAATCCATGCAAAA----- mirR 18 146
-----GTGCAAATCCATGCAAAACTGAC----- mirR 23 78
-----CTGTGCAAATCCATGCAAAACT----- mirR 22 68
-----CTGTGCAAATCCATGCAAAACTG----- mirR 23 49
-----GCAAATCCATGCAAAACTGA----- mirR 20 49
-----GTGCAAATCCATGCAAAAC----- mirR 19 39
-----CTGTGCAAATCCATGCAAAACTGA----- mirR 24 35
-----GTGCAAATCCATGCAAAA----- mirR 18 22
-----CTGTGCAAATCCATGCAAAACTGAC----- mirR 25 16
-----CTGTGCAAATCCATGCAAAAC----- mirR 21 15
-----GCAAATCCATGCAAAACTG----- mirR 19 6
-----CTGTGCAAATCCATGCAAAA----- mirR 20 3
-----GCAAATCCATGCAAAACT----- mirR 18 2
-----TGCAAATCCATGCAAAACT----- mirR 19 2
-----GCAAATCCATGCAAAACTGAC----- mirR 21 2
-----TGCAAATCCATGCAAAACTGA----- mirR 21 1
-----GCTGTGCAAATCCATGCAAAACTGA----- mirR 25 1
-----CTGTGCAAATCCATGCAA----- mirR 18 1
-----GCTGTGCAAATCCATGCAAAAC----- mirR 22 1

```

>mmu-mir-329

| Sequence                                                                                              | species | len | reads |
|-------------------------------------------------------------------------------------------------------|---------|-----|-------|
| TTCGCTTCTGGTACCGAAGAGAGAGGTTTTCTGGGTCTCTGTTTCTTTGATGAGAATGAAACACACCCAGCTAACCTTTTTTTCAGTATCAAATCCCATCT | morL    | 18  | 1     |
| -----CTTCTGGTACCGAAGAG-----                                                                           | morL    | 18  | 1     |
| TTCGCTTCTGGTACCGA-----                                                                                | morL    | 18  | 1     |
| -----AGAGGTTTTCTGGGTCTCTGTTTC-----                                                                    | mirL    | 24  | 2545  |
| -----AGAGGTTTTCTGGGTCTCTGTTT-----                                                                     | mirL    | 23  | 2448  |
| -----AGAGGTTTTCTGGGTCTCTGT-----                                                                       | mirL    | 21  | 1345  |
| -----AGAGGTTTTCTGGGTCTCTGTT-----                                                                      | mirL    | 22  | 586   |
| -----AGAGGTTTTCTGGGTCTCTGTTTCT-----                                                                   | mirL    | 25  | 404   |
| -----AGAGGTTTTCTGGGTCTCT-----                                                                         | mirL    | 19  | 274   |
| -----AGAGGTTTTCTGGGTCTCTG-----                                                                        | mirL    | 20  | 265   |
| -----GAGGTTTTCTGGGTCTCTGTTTC-----                                                                     | mirL    | 23  | 82    |
| -----GAGGTTTTCTGGGTCTCTGTTT-----                                                                      | mirL    | 22  | 74    |
| -----GAGGTTTTCTGGGTCTCTGTTTCT-----                                                                    | mirL    | 24  | 13    |
| -----GAGGTTTTCTGGGTCTCTGT-----                                                                        | mirL    | 20  | 11    |
| -----AGGTTTTCTGGGTCTCTGTTT-----                                                                       | mirL    | 21  | 10    |
| -----AGGTTTTCTGGGTCTCTGTTTC-----                                                                      | mirL    | 22  | 9     |
| -----GAGGTTTTCTGGGTCTCTG-----                                                                         | mirL    | 19  | 7     |
| -----GAGGTTTTCTGGGTCTCT-----                                                                          | mirL    | 18  | 3     |
| -----GAGGTTTTCTGGGTCTCTGTT-----                                                                       | mirL    | 21  | 3     |
| -----AAGAGAGGTTTTCTGGGTC-----                                                                         | mirL    | 19  | 2     |
| -----GGTTTTCTGGGTCTCTGTTT-----                                                                        | mirL    | 20  | 2     |
| -----AGGTTTTCTGGGTCTCTGTTTCT-----                                                                     | mirL    | 23  | 2     |
| -----AGGTTTTCTGGGTCTCTGT-----                                                                         | mirL    | 19  | 2     |
| -----AGGTTTTCTGGGTCTCTG-----                                                                          | mirL    | 18  | 1     |
| -----AGGTTTTCTGGGTCTCTGTTTCTT-----                                                                    | mirL    | 24  | 1     |
| -----AGAGAGGTTTTCTGGGTC-----                                                                          | mirL    | 18  | 1     |
| -----GGTTTTCTGGGTCTCTGTTTCT-----                                                                      | mirL    | 22  | 1     |
| -----AGGTTTTCTGGGTCTCTGTT-----                                                                        | mirL    | 20  | 1     |
| -----AACACACCCAGCTAACCTTTTT-----                                                                      | mirR    | 21  | 17052 |
| -----AACACACCCAGCTAACCTTTTT-----                                                                      | mirR    | 22  | 15001 |
| -----AACACACCCAGCTAACCTTT-----                                                                        | mirR    | 20  | 4229  |
| -----AACACACCCAGCTAACCTT-----                                                                         | mirR    | 19  | 2375  |
| -----AACACACCCAGCTAACCTTTTTT-----                                                                     | mirR    | 23  | 1467  |
| -----AACACACCCAGCTAACCT-----                                                                          | mirR    | 18  | 1032  |
| -----ACACACCCAGCTAACCTTTTT-----                                                                       | mirR    | 21  | 324   |
| -----ACACACCCAGCTAACCTTTT-----                                                                        | mirR    | 20  | 273   |
| -----AACACACCCAGCTAACCTTTTTT-----                                                                     | mirR    | 24  | 141   |
| -----ACACACCCAGCTAACCTTT-----                                                                         | mirR    | 19  | 78    |
| -----ACACACCCAGCTAACCTT-----                                                                          | mirR    | 18  | 74    |
| -----ACACACCCAGCTAACCTTTTT-----                                                                       | mirR    | 22  | 69    |
| -----AAACACACCCAGCTAACCTTTT-----                                                                      | mirR    | 22  | 68    |
| -----AAACACACCCAGCTAACCTTT-----                                                                       | mirR    | 21  | 54    |
| -----AAACACACCCAGCTAACCTTTTT-----                                                                     | mirR    | 23  | 20    |
| -----ACACCCAGCTAACCTTTTT-----                                                                         | mirR    | 19  | 20    |
| -----ACACACCCAGCTAACCTTTTTTTC-----                                                                    | mirR    | 24  | 14    |

```

-----ACACCCAGCTAACCTTTT----- mirR 18 13
-----ACACACCCAGCTAACCTTTTTTT----- mirR 23 10
-----AAACACACCCAGCTAACCT----- mirR 19 10
-----TGAAACACACCCAGCTAACCTTT----- mirR 23 7
-----CACACCCAGCTAACCTTTTT----- mirR 20 7
-----AAACACACCCAGCTAACCTT----- mirR 20 6
-----AAACACACCCAGCTAACCC----- mirR 18 6
-----CACACCCAGCTAACCTTTT----- mirR 19 5
-----GAAACACACCCAGCTAACCTTT----- mirR 22 5
-----GAAACACACCCAGCTAACCTTT----- mirR 23 4
-----AAACACACCCAGCTAACCTTTTTT----- mirR 24 3
-----CACACCCAGCTAACCTTT----- mirR 18 3
-----TGAAACACACCCAGCTAACCTT----- mirR 22 3
-----TGAAACACACCCAGCTAAC----- mirR 19 2
-----GAAACACACCCAGCTAACCTT----- mirR 21 2
-----GAAACACACCCAGCTAACCC----- mirR 19 2
-----ACACCCAGCTAACCTTTTTT----- mirR 20 1
-----TGAAACACACCCAGCTAACCT----- mirR 21 1
-----CACACCCAGCTAACCTTTTTTTTC----- mirR 23 1
-----GAAACACACCCAGCTAACCTTTTT----- mirR 24 1
-----CACACCCAGCTAACCTTTTTT----- mirR 21 1
-----GAAACACACCCAGCTAAC----- mirR 18 1
-----TTCAGTATCAAATCCCAT-- morR 18 1
-----TCAGTATCAAATCCCATCT morR 19 1

```

>mmu-mir-106b

```

CCTACCAGCCCTGCTGGGACTAAAGTGCTGACAGTGCAGATAGTGGTCCTCTCTGTGCTACCGCACTGTGGGTACTTGCTGCTCCAGCAGGGCAGTGTC species len reads
---ACCAGCCCTGCTGGGACTA----- morL 19 1
-CTACCAGCCCTGCTGGGACTA----- morL 21 1
CCTACCAGCCCTGCTGGGA----- morL 19 1
---ACCAGCCCTGCTGGGACT----- morL 18 1
-----TAAAGTGCTGACAGTGCAGAT----- mirL 21 18999
-----TAAAGTGCTGACAGTGCAGATA----- mirL 22 10346
-----TAAAGTGCTGACAGTGCAGATAG----- mirL 23 7094
-----TAAAGTGCTGACAGTGCAG----- mirL 19 1739
-----TAAAGTGCTGACAGTGCAGA----- mirL 20 1634
-----AAAGTGCTGACAGTGCAGAT----- mirL 20 1014
-----TAAAGTGCTGACAGTGCAGATAGT----- mirL 24 977
-----AAAGTGCTGACAGTGCAGATA----- mirL 21 539
-----AAAGTGCTGACAGTGCAGATAG----- mirL 22 492
-----TAAAGTGCTGACAGTGCAG----- mirL 18 192
-----AAAGTGCTGACAGTGCAGA----- mirL 19 150
-----AGTGCTGACAGTGCAGAT----- mirL 18 117
-----AAAGTGCTGACAGTGCAGATAGT----- mirL 23 91
-----AAAGTGCTGACAGTGCAG----- mirL 18 83
-----AAGTGCTGACAGTGCAGAT----- mirL 19 66

```

```

-----AAAGTGCTGACAGTGCAGATAGTG----- mirL 24 13
-----AAGTGCTGACAGTGCAGA----- mirL 18 12
-----AGTGCTGACAGTGCAGATA----- mirL 19 11
-----AAGTGCTGACAGTGCAGATAG----- mirL 21 10
-----AAGTGCTGACAGTGCAGATA----- mirL 20 8
-----AGTGCTGACAGTGCAGATAG----- mirL 20 7
-----CTAAAGTGCTGACAGTGCAGAT----- mirL 22 5
-----GACTAAAGTGCTGACAGTGCAGAT----- mirL 24 2
-----AAGTGCTGACAGTGCAGATAGT----- mirL 22 2
-----CTAAAGTGCTGACAGTGCAGATA----- mirL 23 1
-----ACTAAAGTGCTGACAGTGCAGATAG----- mirL 25 1
-----CTAAAGTGCTGACAGTGCAGATAG----- mirL 24 1
-----GTGGTCCTCTCTGTGCTA----- loop 18 2
-----TGGTCCTCTCTGTGCTAC----- loop 18 1
-----CCGCACTGTGGGTA C T T G C T----- mirR 20 1885
-----CCGCACTGTGGGTA C T T G C T G----- mirR 21 1026
-----CCGCACTGTGGGTA C T T G C T G C----- mirR 22 587
-----CCGCACTGTGGGTA C T T G C----- mirR 19 435
-----CCGCACTGTGGGTA C T T G C T G C T----- mirR 23 135
-----TACCGCACTGTGGGTA C T T G C T----- mirR 22 78
-----CCGCACTGTGGGTA C T T G C T G C T C----- mirR 24 73
-----CCGCACTGTGGGTA C T T G----- mirR 18 60
-----ACCGCACTGTGGGTA C T T G C T----- mirR 21 37
-----TACCGCACTGTGGGTA C T T G C----- mirR 21 31
-----CGCACTGTGGGTA C T T G C T G----- mirR 20 19
-----GCACTGTGGGTA C T T G C T G C----- mirR 20 16
-----ACCGCACTGTGGGTA C T T G C T G C----- mirR 23 10
-----TACCGCACTGTGGGTA C T T G C T G C----- mirR 24 10
-----ACCGCACTGTGGGTA C T T G C T G----- mirR 22 10
-----ACCGCACTGTGGGTA C T T G C----- mirR 20 8
-----CGCACTGTGGGTA C T T G C T G C----- mirR 21 8
-----GCACTGTGGGTA C T T G C T G----- mirR 19 8
-----CACTGTGGGTA C T T G C T G C----- mirR 19 7
-----CGCACTGTGGGTA C T T G C T----- mirR 19 6
-----TACCGCACTGTGGGTA C T T G C T G----- mirR 23 5
-----CACTGTGGGTA C T T G C T G----- mirR 18 5
-----CGCACTGTGGGTA C T T G C----- mirR 18 4
-----TACCGCACTGTGGGTA C T T----- mirR 19 3
-----GCACTGTGGGTA C T T G C T G C T----- mirR 21 3
-----TACCGCACTGTGGGTA C T T G C T G C T----- mirR 25 2
-----GCACTGTGGGTA C T T G C T----- mirR 18 2
-----TACCGCACTGTGGGTA C T T G----- mirR 20 2
-----ACCGCACTGTGGGTA C T T G----- mirR 19 2
-----ACCGCACTGTGGGTA C T T----- mirR 18 2
-----ACCGCACTGTGGGTA C T T G C T----- mirR 24 1
-----CGCACTGTGGGTA C T T G C T G C T----- mirR 22 1

```

```
-----CTCCAGCAGGGCACGTGC morR 18 1

>mmu-mir-376a
GTTCTTTGATATTTAAAAGGTAGATTCTCCTTCTATGAGTACAATATTAATGACTAATCGTAGAGGAAAATCCACGTTTTCAGTAT species len reads
GTTCTTTGATATTTAAAA-----morL 18 1
--TCTTTGATATTTAAAAGG-----morL 18 1
GTTCTTTGATATTTAAAAGGT-----morL 21 1
-----GGTAGATTCTCCTTCTATGAGT-----mirL 22 2235
-----GTAGATTCTCCTTCTATGAGT-----mirL 21 698
-----GGTAGATTCTCCTTCTATGAGTA-----mirL 23 369
-----GGTAGATTCTCCTTCTATGAG-----mirL 21 266
-----GGTAGATTCTCCTTCTATGA-----mirL 20 260
-----GTAGATTCTCCTTCTATGAGTAC-----mirL 23 250
-----GTAGATTCTCCTTCTATGAGTA-----mirL 22 241
-----GGTAGATTCTCCTTCTATGAGTAC-----mirL 24 240
-----TAGATTCTCCTTCTATGAGTAC-----mirL 22 169
-----GTAGATTCTCCTTCTATGA-----mirL 19 87
-----GTAGATTCTCCTTCTATGAG-----mirL 20 71
-----GGTAGATTCTCCTTCTATG-----mirL 19 64
-----AGGTAGATTCTCCTTCTATGAGT-----mirL 23 63
-----TAGATTCTCCTTCTATGA-----mirL 18 25
-----GGTAGATTCTCCTTCTAT-----mirL 18 23
-----GTAGATTCTCCTTCTATG-----mirL 18 19
-----AAGGTAGATTCTCCTTCTATGAGT-----mirL 24 15
-----TAGATTCTCCTTCTATGAGTACA-----mirL 23 14
-----GTAGATTCTCCTTCTATGAGTACA-----mirL 24 13
-----AGGTAGATTCTCCTTCTATGAG-----mirL 22 11
-----TAGATTCTCCTTCTATGAGT-----mirL 20 10
-----AGATTCTCCTTCTATGAGTAC-----mirL 21 10
-----AGATTCTCCTTCTATGAGT-----mirL 19 8
-----AAGGTAGATTCTCCTTCTATGAGTA-----mirL 25 6
-----AGATTCTCCTTCTATGAGTA-----mirL 20 6
-----AAGGTAGATTCTCCTTCTATGA-----mirL 22 5
-----AGATTCTCCTTCTATGAG-----mirL 18 5
-----AGGTAGATTCTCCTTCTATGA-----mirL 21 5
-----AAGGTAGATTCTCCTTCTATG-----mirL 21 5
-----AGGTAGATTCTCCTTCTATGAGTA-----mirL 24 4
-----AAGGTAGATTCTCCTTCT-----mirL 18 4
-----AAGGTAGATTCTCCTTCTATGAG-----mirL 23 3
-----AGGTAGATTCTCCTTCTATG-----mirL 20 3
-----AAGGTAGATTCTCCTTCTAT-----mirL 20 3
-----TAGATTCTCCTTCTATGAGTA-----mirL 21 2
-----TAGATTCTCCTTCTATGAG-----mirL 19 1
-----AAAGGTAGATTCTCCTTCT-----mirL 19 1
-----TAGATTCTCCTTCTATGAGTACAAT-----mirL 25 1
-----AGATTCTCCTTCTATGAGTACA-----mirL 22 1
```

```

-----AAAGGTAGATTCTCCTTCTATGA----- mirL 23 1
-----ATCGTAGAGGAAAATCCACGT----- mirR 21 23103
-----ATCGTAGAGGAAAATCCACG----- mirR 20 6775
-----ATCGTAGAGGAAAATCCAC----- mirR 19 3980
-----ATCGTAGAGGAAAATCCACGTT----- mirR 22 3740
-----ATCGTAGAGGAAAATCCA----- mirR 18 2145
-----ATCGTAGAGGAAAATCCACGTTT----- mirR 23 753
-----AATCGTAGAGGAAAATCCACGT----- mirR 22 159
-----CGTAGAGGAAAATCCACGT----- mirR 19 133
-----ATCGTAGAGGAAAATCCACGTTT----- mirR 24 129
-----CGTAGAGGAAAATCCACG----- mirR 18 96
-----TCGTAGAGGAAAATCCACG----- mirR 19 76
-----GTAGAGGAAAATCCACGT----- mirR 18 56
-----AATCGTAGAGGAAAATCCAC----- mirR 20 54
-----TCGTAGAGGAAAATCCACGT----- mirR 20 39
-----AATCGTAGAGGAAAATCCACG----- mirR 21 30
-----AATCGTAGAGGAAAATCCA----- mirR 19 19
-----CGTAGAGGAAAATCCACGTT----- mirR 20 18
-----AATCGTAGAGGAAAATCCACGTT----- mirR 23 15
-----GTAGAGGAAAATCCACGTTT----- mirR 21 11
-----TCGTAGAGGAAAATCCACGTTT----- mirR 22 10
-----TCGTAGAGGAAAATCCAC----- mirR 18 7
-----AATCGTAGAGGAAAATCC----- mirR 18 6
-----GTAGAGGAAAATCCACGTT----- mirR 19 6
-----CGTAGAGGAAAATCCACGTTT----- mirR 21 6
-----TCGTAGAGGAAAATCCACGTT----- mirR 21 5
-----TAATCGTAGAGGAAAATCCAC----- mirR 21 3
-----CTAATCGTAGAGGAAAAT----- mirR 18 2
-----GTAGAGGAAAATCCACGTTTTC----- mirR 22 2
-----AATCGTAGAGGAAAATCCACGTTT----- mirR 24 2
-----GTAGAGGAAAATCCACGTTT----- mirR 20 2
-----CGTAGAGGAAAATCCACGTTTTCAGTAT----- mirR 28 1
-----TAATCGTAGAGGAAAATCCA----- mirR 20 1

```

>mmu-mir-193b

```

TGGAGGCGGTGGGCCAGAAATCGGGGTTTTGAGGGCGAGATGAGTTTGTGTTTTATCCAAGTGGCCACAAAGTCCCCTTTTGGGGTCATCCTAACAGC species len reads
TGGAGGCGGTGGGCCAGAA----- morL 20 1
-----CGGTGGGCCAGAAATCGG----- morL 18 1
--GAGGCGGTGGGCCAGAA----- morL 19 1
-----GCGGTGGGCCAGAAATCG----- morL 18 1
-----CGGGTTTTGAGGGCGAGATGA----- mirL 22 603
-----CGGGTTTTGAGGGCGAGATG----- mirL 21 183
-----CGGGTTTTGAGGGCGAGAT----- mirL 20 84
-----CGGGTTTTGAGGGCGAGATGAG----- mirL 23 76
-----CGGGTTTTGAGGGCGAGA----- mirL 19 41
-----CGGGTTTTGAGGGCGAG----- mirL 18 38

```



```

-----GGTTTTGAGGGCGAGATGA----- mirL 19 25
-----GGTTTTGAGGGCGAGATG----- mirL 18 12
-----TCGGGGTTTTGAGGGCGAGATG----- mirL 22 10
-----GGTTTTGAGGGCGAGATGA----- mirL 20 7
-----CGGGGTTTTGAGGGCGAGATGAGT----- mirL 24 7
-----TCGGGGTTTTGAGGGCGAGATGA----- mirL 23 6
-----TCGGGGTTTTGAGGGCGAGA----- mirL 20 6
-----GGGGTTTTGAGGGCGAGATGAG----- mirL 22 2
-----GGGGTTTTGAGGGCGAGATG----- mirL 20 2
-----TCGGGGTTTTGAGGGCGAGAT----- mirL 21 2
-----GGGGTTTTGAGGGCGAGATGA----- mirL 21 1
-----AATCGGGTTTTGAGGGCG----- mirL 19 1
-----GGGTTTTGAGGGCGAGATG----- mirL 19 1
-----GGGTTTTGAGGGCGAGATGAG----- mirL 21 1
-----ATCGGGGTTTTGAGGGCG----- mirL 18 1
-----GGGGTTTTGAGGGCGAGAT----- mirL 19 1
-----TGAGTTTGTGTTTTATCC----- loop 18 1
-----TGAGTTTGTGTTTTATCCA----- loop 19 1
-----AACTGGCCACAAAGTCCCGCT----- mirR 22 16362
-----AACTGGCCACAAAGTCCCGCTT----- mirR 23 8705
-----AACTGGCCACAAAGTCCCGCTTT----- mirR 24 7497
-----AACTGGCCACAAAGTCCCGC----- mirR 21 4073
-----AACTGGCCACAAAGTCC----- mirR 18 3410
-----AACTGGCCACAAAGTCCCG----- mirR 20 1753
-----AACTGGCCACAAAGTCCC----- mirR 19 1645
-----ACTGGCCACAAAGTCCCGCTT----- mirR 22 603
-----ACTGGCCACAAAGTCCCGCTTT----- mirR 23 497
-----ACTGGCCACAAAGTCCCGCT----- mirR 21 189
-----ACTGGCCACAAAGTCCCGC----- mirR 20 117
-----ACTGGCCACAAAGTCCC----- mirR 18 104
-----ACTGGCCACAAAGTCCCG----- mirR 19 94
-----CTGGCCACAAAGTCCCGCT----- mirR 20 79
-----ACTGGCCACAAAGTCCCGCTTTT----- mirR 24 65
-----TGGCCACAAAGTCCCGCT----- mirR 19 62
-----CTGGCCACAAAGTCCCGC----- mirR 19 16
-----CTGGCCACAAAGTCCCG----- mirR 18 15
-----TGGCCACAAAGTCCCGC----- mirR 18 11
-----CTGGCCACAAAGTCCCGCTTT----- mirR 22 10
-----CAACTGGCCACAAAGTCCCGCT----- mirR 23 8
-----CTGGCCACAAAGTCCCGCTT----- mirR 21 7
-----TGGCCACAAAGTCCCGCTT----- mirR 20 7
-----CAACTGGCCACAAAGTCCCGCTT----- mirR 24 6
-----TGGCCACAAAGTCCCGCTTT----- mirR 21 6
-----CCAAGTGGCCACAAAGTCCCGCT----- mirR 24 4
-----CAACTGGCCACAAAGTCCCGC----- mirR 22 4
-----CAACTGGCCACAAAGTCC----- mirR 19 3

```

```

-----CCAACTGGCCACAAAAGTCCCGC----- mirR 23 3
-----TGGCCACAAAAGTCCCGTTTT----- mirR 22 3
-----CTGGCCACAAAAGTCCCGTTTT----- mirR 23 1
-----CAACTGGCCACAAAAGTCCCGTTTT----- mirR 26 1
-----CAACTGGCCACAAAAGTCCCGTTTT----- mirR 25 1
-----CAACTGGCCACAAAAGTCCCG----- mirR 21 1
-----TCCAACTGGCCACAAAAG----- mirR 18 1
-----TTGGGGTCATCCTAACAGC morR 19 1
-----CTTTTGGGGTCATCCTAACAA-- morR 20 1
-----TGGGGTCATCCTAACAGC morR 18 1

>mmu-mir-181c
CTTGCCAAGGGTTTGGGGGAACATTCAACCTGTCGGTGAGTTTGGGCAGCTCAGACAAACCATCGACCGTTGAGTGGACCCCGAGGCCTGGAAGTGCCACCC species len reads
--TGCCAAGGGTTTGGGGGA----- morL 18 2
--TTGCCAAGGGTTTGGGGGA----- morL 19 1
CTTGCCAAGGGTTTGGGG----- morL 18 1
-----AACATTCAACCTGTCGGTGAGTTT----- mirL 24 10724
-----AACATTCAACCTGTCGGTGAGTT----- mirL 23 8092
-----AACATTCAACCTGTCGGTGAGT----- mirL 22 5941
-----AACATTCAACCTGTCGGTGAGTTTG----- mirL 25 5391
-----AACATTCAACCTGTCGGTGA----- mirL 20 2819
-----AACATTCAACCTGTCGGTGAG----- mirL 21 2669
-----AACATTCAACCTGTCGGTG----- mirL 19 2144
-----ACATTCAACCTGTCGGTGAGTTT----- mirL 23 34
-----ACATTCAACCTGTCGGTGAGTTTG----- mirL 24 26
-----ACATTCAACCTGTCGGTGAGTT----- mirL 22 17
-----ACATTCAACCTGTCGGTGAGT----- mirL 21 17
-----CATTCAACCTGTCGGTGAGTTTG----- mirL 23 10
-----ACATTCAACCTGTCGGTGAGTTTG----- mirL 25 6
-----ACATTCAACCTGTCGGTGAG----- mirL 20 6
-----GAACATTCAACCTGTCGGTGA----- mirL 21 6
-----GAACATTCAACCTGTCGGTGAGTT----- mirL 24 6
-----ACATTCAACCTGTCGGTGA----- mirL 19 5
-----ATTCAACCTGTCGGTGAG----- mirL 18 5
-----CATTCAACCTGTCGGTGAGTTT----- mirL 22 5
-----CATTCAACCTGTCGGTGA----- mirL 18 4
-----CATTCAACCTGTCGGTGAG----- mirL 19 4
-----GAACATTCAACCTGTCGGTGAGT----- mirL 23 4
-----GAACATTCAACCTGTCGGTGAG----- mirL 22 3
-----GAACATTCAACCTGTCGGTGAGTTTG----- mirL 26 3
-----GAACATTCAACCTGTCGGTGAGTTT----- mirL 25 3
-----CATTCAACCTGTCGGTGAGTTTG----- mirL 24 3
-----CATTCAACCTGTCGGTGAGT----- mirL 20 3
-----GAACATTCAACCTGTCGGT----- mirL 19 2
-----ATTCAACCTGTCGGTGAGTTT----- mirL 21 2
-----ATTCAACCTGTCGGTGAGTT----- mirL 20 2

```

```

-----ATTCAACCTGTCGGTGAGT----- mirL 19 1
-----CATTCAACCTGTCGGTGAGTT----- mirL 21 1
-----TGGGCAGCTCAGACAAACC----- loop 19 1
-----GGGCAGCTCAGACAAACC----- loop 18 1
-----TTTGGGCAGCTCAGACAA----- loop 18 1
-----ACCATCGACCGTTGAGTGGACC----- mirR 22 1984
-----ACCATCGACCGTTGAGTGGACCC----- mirR 23 1972
-----ACCATCGACCGTTGAGTGGAC----- mirR 21 1083
-----AACCATCGACCGTTGAGTGGAC----- mirR 22 755
-----ACCATCGACCGTTGAGTGG----- mirR 19 353
-----ACCATCGACCGTTGAGTGG----- mirR 20 349
-----AACCATCGACCGTTGAGTGG----- mirR 21 286
-----AACCATCGACCGTTGAGTGGACC----- mirR 23 253
-----AACCATCGACCGTTGAGTGG----- mirR 20 162
-----ACCATCGACCGTTGAGTGGACCC----- mirR 24 98
-----AACCATCGACCGTTGAGTGG----- mirR 19 67
-----AACCATCGACCGTTGAGTGGACCC----- mirR 24 56
-----ACCATCGACCGTTGAGTGG----- mirR 18 22
-----ATCGACCGTTGAGTGGAC----- mirR 18 16
-----CATCGACCGTTGAGTGGAC----- mirR 19 13
-----CCATCGACCGTTGAGTGGAC----- mirR 20 13
-----AACCATCGACCGTTGAGT----- mirR 18 13
-----CCATCGACCGTTGAGTGG----- mirR 19 7
-----CATCGACCGTTGAGTGGAC----- mirR 20 7
-----CCATCGACCGTTGAGTGGAC----- mirR 21 6
-----ATCGACCGTTGAGTGGAC----- mirR 19 5
-----CCATCGACCGTTGAGTGG----- mirR 18 3
-----CCATCGACCGTTGAGTGGACCC----- mirR 22 2
-----ATCGACCGTTGAGTGGACCC----- mirR 20 2
-----CATCGACCGTTGAGTGG----- mirR 18 2
-----CATCGACCGTTGAGTGGACCC----- mirR 21 1
-----AAACCATCGACCGTTGAG----- mirR 18 1
-----AAACCATCGACCGTTGAGTGG----- mirR 22 1
-----CCCCGAGGCCTGGAAGTGC----- morR 18 6
-----CCCGAGGCCTGGAAGTGC----- morR 18 3
-----AGGCCTGGAAGTGCACCC----- morR 19 1
-----CCGAGGCCTGGAAGTGCACCC----- morR 21 1
-----CCGAGGCCTGGAAGTGC----- morR 18 1
>mmu-mir-101b
TCTGAGACTGAAGTGCCTTTTTCGGTTATCATGGTACCGATGCTGTAGCTCTGAAAGGTACAGTACTGTGATAGCTGAAGAATGGCGGTGCCATCACGT species len reads
TCTGAGACTGAAGTGCCTTT----- morL 20 2
-----GACTGAAGTGCCTTTT----- morL 18 1
-----GAGACTGAAGTGCCTTT----- morL 18 1
-----ACTGAAGTGCCTTTTTC----- morL 18 1
-----TCGGTTATCATGGTACCGATGC----- mirL 22 15

```

```

-----TCGGTTATCATGGTACCGATGCT----- mirL 23 9
-----GTTATCATGGTACCGATG----- mirL 18 1
-----CGGTTATCATGGTACCGATGCT----- mirL 22 1
-----CGGTTATCATGGTACCGATGCTGTA----- mirL 25 1
-----TCGGTTATCATGGTACCGAT----- mirL 20 1
-----CGGTTATCATGGTACCGATGCTGTAGCTC----- mirL 29 1
-----CTGTAGCTCTGAAAGGTA----- loop 18 1
-----GTACAGTACTGTGATAGCTGA----- mirR 21 10576
-----GTACAGTACTGTGATAGCTGAA----- mirR 22 9534
-----TACAGTACTGTGATAGCTGAAG----- mirR 22 3996
-----GTACAGTACTGTGATAGCTGAAG----- mirR 23 3549
-----TACAGTACTGTGATAGCTGA----- mirR 20 3016
-----TACAGTACTGTGATAGCTGAA----- mirR 21 2837
-----TACAGTACTGTGATAGCTGAAGA----- mirR 23 1911
-----GTACAGTACTGTGATAGCTG----- mirR 20 1620
-----GTACAGTACTGTGATAGCT----- mirR 18 1529
-----GTACAGTACTGTGATAGCT----- mirR 19 1300
-----TACAGTACTGTGATAGCTG----- mirR 19 535
-----GTACAGTACTGTGATAGCTGAAGA----- mirR 24 430
-----ACAGTACTGTGATAGCTGAAGA----- mirR 22 430
-----TACAGTACTGTGATAGCTGAAGAA----- mirR 24 402
-----TACAGTACTGTGATAGCT----- mirR 18 352
-----ACAGTACTGTGATAGCTGAAG----- mirR 21 321
-----ACAGTACTGTGATAGCTGAA----- mirR 20 216
-----ACAGTACTGTGATAGCTGA----- mirR 19 205
-----ACAGTACTGTGATAGCTGAAGAA----- mirR 23 178
-----ACAGTACTGTGATAGCTG----- mirR 18 39
-----CAGTACTGTGATAGCTGAAGA----- mirR 21 20
-----CAGTACTGTGATAGCTGAAGAA----- mirR 22 14
-----CAGTACTGTGATAGCTGAA----- mirR 19 11
-----ACAGTACTGTGATAGCTGAAGAAT----- mirR 24 10
-----CAGTACTGTGATAGCTGAAG----- mirR 20 10
-----GGTACAGTACTGTGATAGCTGAA----- mirR 23 8
-----CAGTACTGTGATAGCTGA----- mirR 18 7
-----CAGTACTGTGATAGCTGAAGAAAT----- mirR 23 5
-----GGTACAGTACTGTGATAGCTGA----- mirR 22 3
-----AGGTACAGTACTGTGATAGCTGAA----- mirR 24 1
-----GGTACAGTACTGTGATAGCTG----- mirR 21 1
-----AGGTACAGTACTGTGATAGCT----- mirR 20 1
-----CAGTACTGTGATAGCTGAAGAATGG----- mirR 25 1
-----AGAATGGCGGTGCCATCA--- morR 18 3
-----GAATGGCGGTGCCATCAC--- morR 18 1
-----ATGGCGGTGCCATCACGT morR 18 1

```

>mmu-mir-532

GCCTACAGATTTGCTTTTTCTTTCCATGCCCTTGAGTGTAGGACCGTTGACATCTTAATTACCCTCCCACACCCAAGGCTTGACAGGAGCAAGCCTTCTTCTCTC species len reads

```

-----GATTTGCTTTTTCTCTTC----- morL 18 3
----ACAGATTTGCTTTTTCTCTTCC----- morL 22 2
----CAGATTTGCTTTTTCTCTT----- morL 19 1
----ACAGATTTGCTTTTTCTC----- morL 18 1
GCCTACAGATTTGCTTTTTCTCTTC----- morL 25 1
-----ATTTGCTTTTTCTCTTCC----- morL 18 1
----AGATTTGCTTTTTCTCTTC----- morL 19 1
-----CATGCCTTGAGTGTAGGACCGT----- mirL 22 20165
-----CATGCCTTGAGTGTAGGACCG----- mirL 21 3703
-----CATGCCTTGAGTGTAGGACCGTT----- mirL 23 2600
-----CATGCCTTGAGTGTAGGAC----- mirL 19 2490
-----CATGCCTTGAGTGTAGGACC----- mirL 20 1453
-----CATGCCTTGAGTGTAGGACCGTTG----- mirL 24 729
-----ATGCCTTGAGTGTAGGACCGT----- mirL 21 269
-----CATGCCTTGAGTGTAGGA----- mirL 18 224
-----TGCCTTGAGTGTAGGACCGT----- mirL 20 131
-----ATGCCTTGAGTGTAGGACCG----- mirL 20 108
-----GCCTTGAGTGTAGGACCGT----- mirL 19 75
-----GCCTTGAGTGTAGGACCG----- mirL 18 49
-----CCATGCCTTGAGTGTAGGACCGT----- mirL 23 33
-----TGCCTTGAGTGTAGGACCG----- mirL 19 26
-----ATGCCTTGAGTGTAGGACCGTT----- mirL 22 22
-----TGCCTTGAGTGTAGGACCGTT----- mirL 21 17
-----ATGCCTTGAGTGTAGGAC----- mirL 18 10
-----GCCTTGAGTGTAGGACCGTT----- mirL 20 9
-----CCATGCCTTGAGTGTAGGACCG----- mirL 22 8
-----CCATGCCTTGAGTGTAGGACC----- mirL 21 7
-----ATGCCTTGAGTGTAGGACC----- mirL 19 5
-----CCATGCCTTGAGTGTAGGACCGTT----- mirL 24 5
-----CCATGCCTTGAGTGTAGGA----- mirL 19 4
-----TGCCTTGAGTGTAGGACC----- mirL 18 3
-----CCATGCCTTGAGTGTAGGAC----- mirL 20 3
-----ATGCCTTGAGTGTAGGACCGTTG----- mirL 23 3
-----ATGCCTTGAGTGTAGGACCGTTGAC----- mirL 25 2
-----CCATGCCTTGAGTGTAGGACCGTTG----- mirL 25 2
-----GCCTTGAGTGTAGGACCGTTG----- mirL 21 2
-----GCCTTGAGTGTAGGACCGTTGAC----- mirL 23 1
TTCCATGCCTTGAGTGTAGT----- mirL 18 1
-----TTCCATGCCTTGAGTGTAGGACCG----- mirL 24 1
-----TTGACATCTTAATTACCC----- loop 18 1
-----CGTTGACATCTTAATTACCC----- loop 20 1
-----CCTCCCACACCCAAGGCTTG----- mirR 21 4902
-----CCTCCCACACCCAAGGCTTGCA----- mirR 22 3510
-----CCTCCCACACCCAAGGCTTG----- mirR 20 834
-----CCTCCCACACCCAAGGCTTGAG----- mirR 23 575
-----CCTCCCACACCCAAGGCTT----- mirR 19 237

```

```

-----CCTCCACACCCAAGGCT----- mirR 18 144
-----CCTCCACACCCAAGGCTTGAGG----- mirR 24 125
-----CTCCACACCCAAGGCTTGCA----- mirR 21 21
-----CCCACACCCAAGGCTTGCA----- mirR 19 18
-----CTCCACACCCAAGGCTTGC----- mirR 20 12
-----TCCACACCCAAGGCTTGCA----- mirR 20 11
-----CCCACACCCAAGGCTTGC----- mirR 18 10
-----TCCACACCCAAGGCTTGC----- mirR 19 7
-----CCCACACCCAAGGCTTGCA----- mirR 20 4
-----CTCCACACCCAAGGCTTG----- mirR 19 4
-----TCCACACCCAAGGCTTG----- mirR 18 3
-----CTCCACACCCAAGGCTT----- mirR 18 2
-----CTCCACACCCAAGGCTTGCA----- mirR 22 2
-----CCCTCCACACCCAAGGCTTGC----- mirR 22 1
-----CCCTCCACACCCAAGGC----- mirR 18 1
-----CCCTCCACACCCAAGGCT----- mirR 19 1
-----CCCTCCACACCCAAGGCTTG----- mirR 21 1
-----TCCACACCCAAGGCTTGCA----- mirR 21 1
-----TACCCTCCACACCCAAG----- mirR 18 1
-----ACCCTCCACACCCAAG----- mirR 18 1
-----AGAGCAAGCCTTCTCTCTCTC morR 22 2
-----AGAGCAAGCCTTCTCTTC morR 18 2
-----AGGAGAGCAAGCCTTCTC morR 18 1
-----GGAGAGCAAGCCTTCTCT morR 18 1
-----CAGGAGAGCAAGCCTTCT morR 18 1

```

>mmu-mir-19b-2

```

GACATTGCTACTTACGATTAGTTTTGCAGATTGCAGTTCAGCGTATATGTGAATATATGGCTGTGCAAATCCATGCAAAACTGATTGTGGGAATGTGTACCTTTCT species len reads
GACATTGCTACTTACGATT----- morL 19 1
-----AGTTTTGCAGATTGCAGTTCA----- mirL 22 2
-----AGTTTTGCAGATTGCAGTTCAG----- mirL 23 2
-----GTTTTGCAGATTGCAGTTC----- mirL 20 1
-----CGTATATGTGAATATATGGC----- loop 20 1
-----TATATGTGAATATATGGC----- loop 18 1
-----TCAGCGTATATGTGAATATAT----- loop 21 1
-----TGTGCAAATCCATGCAAAACTGA----- mirR 23 16190
-----TGTGCAAATCCATGCAAAACTG----- mirR 22 13178
-----TGTGCAAATCCATGCAAAACT----- mirR 21 7922
-----TGTGCAAATCCATGCAAAAC----- mirR 20 2340
-----TGTGCAAATCCATGCAAAA----- mirR 19 938
-----GTGCAAATCCATGCAAAACTGA----- mirR 22 576
-----GTGCAAATCCATGCAAAACTG----- mirR 21 439
-----GTGCAAATCCATGCAAAACT----- mirR 20 218
-----TGTGCAAATCCATGCAAAA----- mirR 18 146
-----TGTGCAAATCCATGCAAAACTGATT----- mirR 25 106
-----CTGTGCAAATCCATGCAAAACT----- mirR 22 68

```

```

-----CTGTGCAAATCCATGCAAAACTG----- mirR 23 49
-----GCAAATCCATGCAAAACTGA----- mirR 20 49
-----GTGCAAATCCATGCAAAAC----- mirR 19 39
-----CTGTGCAAATCCATGCAAAACTGA----- mirR 24 35
-----GTGCAAATCCATGCAAAA----- mirR 18 22
-----CTGTGCAAATCCATGCAAAAC----- mirR 21 15
-----GCAAATCCATGCAAAACTG----- mirR 19 6
-----CTGTGCAAATCCATGCAAAA----- mirR 20 3
-----GCAAATCCATGCAAAACT----- mirR 18 2
-----TGCAAATCCATGCAAAACT----- mirR 19 2
-----GTGCAAATCCATGCAAAACTGAT----- mirR 23 2
-----TGCAAATCCATGCAAAACTGA----- mirR 21 1
-----GTGCAAATCCATGCAAAACTGATT----- mirR 24 1
-----GCTGTGCAAATCCATGCAAAACTGA----- mirR 25 1
-----CTGTGCAAATCCATGCAA----- mirR 18 1
-----GCTGTGCAAATCCATGCAAAAC----- mirR 22 1
-----TGGGAATGTGTACCTTTCT morR 19 1

>mmu-mir-344-2
TCTCTGCAGCCAGGGTTTTTACCAGTCAGGCTCCTGGCTAGATTCCAGGTACCAACTGGTACCTGATCTAGCCAAAGCCTGACTGTAAGCTGCAAAAGAAAAGGAGG species len reads
-----AGCCAGGGTTTTTACCAG----- morL 18 4
-----GCCAGGGTTTTTACCAGTC----- morL 19 1
TCTCTGCAGCCAGGGTTTTTACC----- morL 22 1
-----AGCCAGGGTTTTTACCAGT----- morL 19 1
-----TCAGGCTCCTGGCTAGATTCC----- mirL 21 14
-----TCAGGCTCCTGGCTAGATTCCA----- mirL 22 12
-----TCAGGCTCCTGGCTAGATTCC----- mirL 20 8
-----TCAGGCTCCTGGCTAGATT----- mirL 19 7
-----GGCTCCTGGCTAGATTCCA----- mirL 19 5
-----CAGGCTCCTGGCTAGATTCCAGG----- mirL 23 3
-----AGGCTCCTGGCTAGATTCCA----- mirL 20 2
-----TCAGGCTCCTGGCTAGATTCCAGGT----- mirL 25 2
-----TCAGGCTCCTGGCTAGAT----- mirL 18 2
-----AGGCTCCTGGCTAGATTCC----- mirL 19 2
-----TCAGGCTCCTGGCTAGATTCCAGGTA----- mirL 26 2
-----AGTCAGGCTCCTGGCTAGA----- mirL 19 1
-----GGCTCCTGGCTAGATTCC----- mirL 18 1
-----AGTCAGGCTCCTGGCTAGATTCC----- mirL 23 1
-----AGTCAGGCTCCTGGCTAGATTCCAG----- mirL 25 1
-----TGATCTAGCCAAAGCCTGACTGT----- mirR 23 31067
-----TGATCTAGCCAAAGCCTGACTG----- mirR 22 2500
-----TGATCTAGCCAAAGCCTGAC----- mirR 20 2021
-----TGATCTAGCCAAAGCCTGACT----- mirR 21 1795
-----GATCTAGCCAAAGCCTGACTGT----- mirR 22 1794
-----TGATCTAGCCAAAGCCTGACTGTA----- mirR 24 1434
-----TGATCTAGCCAAAGCCTGA----- mirR 19 422

```

```

-----CCTGATCTAGCCAAAGCCTGA----- mirR 21 261
-----TGATCTAGCCAAAGCCTGACTGTAA----- mirR 25 172
-----GATCTAGCCAAAGCCTGACTG----- mirR 21 130
-----ATCTAGCCAAAGCCTGACTGT----- mirR 21 121
-----GATCTAGCCAAAGCCTGAC----- mirR 19 85
-----GATCTAGCCAAAGCCTGACTGTA----- mirR 23 84
-----GATCTAGCCAAAGCCTGACT----- mirR 20 83
-----TCTAGCCAAAGCCTGACTGT----- mirR 20 62
-----ATCTAGCCAAAGCCTGACTG----- mirR 20 47
-----CCTGATCTAGCCAAAGCCTGAC----- mirR 22 36
-----GATCTAGCCAAAGCCTGA----- mirR 18 33
-----GATCTAGCCAAAGCCTGACTGTAA----- mirR 24 14
-----TCTAGCCAAAGCCTGACTG----- mirR 19 10
-----CCTGATCTAGCCAAAGCCTG----- mirR 20 10
-----CCTGATCTAGCCAAAGCC----- mirR 18 9
-----CTGATCTAGCCAAAGCCTGACTGT----- mirR 24 8
-----CCTGATCTAGCCAAAGCCT----- mirR 19 7
-----ACCTGATCTAGCCAAAGCCTGA----- mirR 22 6
-----ATCTAGCCAAAGCCTGACT----- mirR 19 5
-----ATCTAGCCAAAGCCTGAC----- mirR 18 5
-----CTGATCTAGCCAAAGCCTGACT----- mirR 22 5
-----CTGATCTAGCCAAAGCCTGAC----- mirR 21 4
-----TCTAGCCAAAGCCTGACT----- mirR 18 4
-----TCTAGCCAAAGCCTGACTGTA----- mirR 21 4
-----ATCTAGCCAAAGCCTGACTGTA----- mirR 22 4
-----CTGATCTAGCCAAAGCCTGA----- mirR 20 2
-----CCTGATCTAGCCAAAGCCTGACT----- mirR 23 2
-----TCTAGCCAAAGCCTGACTGTAA----- mirR 22 1
-----CTGATCTAGCCAAAGCCTG----- mirR 19 1
-----ACCTGATCTAGCCAAAGCCTGAC----- mirR 23 1
-----CTGATCTAGCCAAAGCCTGACTG----- mirR 23 1
-----TAAGCTGCAAAGAAAAGG----- morR 19 1
-----CTGCAAAGAAAAGGAGG----- morR 18 1
-----AAGCTGCAAAGAAAAGG----- morR 18 1

```

>mmu-mir-344-1

```

TCTCTGCAGCCAGGGTTTTTACCAGTCAGGCTCCTGGCTAGATTCCAGGTACCAGCTGGTACCTGATCTAGCCAAAGCCTGACTGTAA species len reads
-----AGCCAGGGTTTTTACCAG----- morL 18 4
-----AGCCAGGGTTTTTACCAGT----- morL 19 1
TCTCTGCAGCCAGGGTTTTTAC----- morL 22 1
-----GCCAGGGTTTTTACCAGTC----- morL 19 1
-----TCAGGCTCCTGGCTAGATTCC----- mirL 21 14
-----TCAGGCTCCTGGCTAGATTCCA----- mirL 22 12
-----TCAGGCTCCTGGCTAGATT----- mirL 20 8
-----TCAGGCTCCTGGCTAGATT----- mirL 19 7
-----GGCTCCTGGCTAGATTCCA----- mirL 19 5

```



```

-----CAGGCTCCTGGCTAGATTCCAGG----- mirL 23 3
-----AGGCTCCTGGCTAGATFCC----- mirL 19 2
-----TCAGGCTCCTGGCTAGAT----- mirL 18 2
-----AGGCTCCTGGCTAGATFCCA----- mirL 20 2
-----TCAGGCTCCTGGCTAGATTCCAGGTA----- mirL 26 2
-----TCAGGCTCCTGGCTAGATFCCAGGT----- mirL 25 2
-----AGTCAGGCTCCTGGCTAGA----- mirL 19 1
-----AGTCAGGCTCCTGGCTAGATFCCAG----- mirL 25 1
-----AGTCAGGCTCCTGGCTAGATFCC----- mirL 23 1
-----GGCTCCTGGCTAGATFCC----- mirL 18 1
-----AGGTACCAGCTGGTACCT----- loop 18 2
-----TGATCTAGCCAAAGCCTGACTGT-- mirR 23 31067
-----TGATCTAGCCAAAGCCTGACTG--- mirR 22 2500
-----TGATCTAGCCAAAGCCTGAC----- mirR 20 2021
-----TGATCTAGCCAAAGCCTGACT--- mirR 21 1795
-----GATCTAGCCAAAGCCTGACTGT-- mirR 22 1794
-----TGATCTAGCCAAAGCCTGACTGTA- mirR 24 1434
-----TGATCTAGCCAAAGCCTGA----- mirR 19 422
-----CCTGATCTAGCCAAAGCCTGA----- mirR 21 261
-----TGATCTAGCCAAAGCCTGACTGTAA mirR 25 172
-----GATCTAGCCAAAGCCTGACTG--- mirR 21 130
-----ATCTAGCCAAAGCCTGACTGT-- mirR 21 121
-----GATCTAGCCAAAGCCTGAC----- mirR 19 85
-----GATCTAGCCAAAGCCTGACTGTA- mirR 23 84
-----GATCTAGCCAAAGCCTGACT--- mirR 20 83
-----TCTAGCCAAAGCCTGACTGT-- mirR 20 62
-----ATCTAGCCAAAGCCTGACTG--- mirR 20 47
-----CCTGATCTAGCCAAAGCCTGAC----- mirR 22 36
-----GATCTAGCCAAAGCCTGA----- mirR 18 33
-----GATCTAGCCAAAGCCTGACTGTAA mirR 24 14
-----CCTGATCTAGCCAAAGCCTG----- mirR 20 10
-----TCTAGCCAAAGCCTGACTG--- mirR 19 10
-----CCTGATCTAGCCAAAGCC----- mirR 18 9
-----CTGATCTAGCCAAAGCCTGACTGT-- mirR 24 8
-----CCTGATCTAGCCAAAGCCT----- mirR 19 7
-----ACCTGATCTAGCCAAAGCCTGA----- mirR 22 6
-----ATCTAGCCAAAGCCTGACT--- mirR 19 5
-----ATCTAGCCAAAGCCTGAC----- mirR 18 5
-----CTGATCTAGCCAAAGCCTGACT--- mirR 22 5
-----TCTAGCCAAAGCCTGACT--- mirR 18 4
-----CTGATCTAGCCAAAGCCTGAC----- mirR 21 4
-----TCTAGCCAAAGCCTGACTGTA- mirR 21 4
-----ATCTAGCCAAAGCCTGACTGTA- mirR 22 4
-----CTGATCTAGCCAAAGCCTGA----- mirR 20 2
-----CCTGATCTAGCCAAAGCCTGACT--- mirR 23 2
-----ACCTGATCTAGCCAAAGCCTGAC----- mirR 23 1

```

```

-----CTGATCTAGCCAAAGCCTG----- mirR 19 1
-----TCTAGCCAAAGCCTGACTGTAA mirR 22 1
-----CTGATCTAGCCAAAGCCTGACTG--- mirR 23 1

>mmu-mir-346
GAGGTCTCTGTGTTGGGCGTCTGTCTGCCCGAGTGCCTGCCTCTCTGTGTCTCTGAAGGAGGCAGGGGCTGGGCCTGCAGCTGCCTGGGCAGAGCTGCTCCTTCGAG species len reads
-----CTCTGTGTTGGGCGTCTG----- morL 18 1
-----TCTCTGTGTTGGGCGTCT----- morL 18 1
GAGGTCTCTGTGTTGGGC----- morL 18 1
-----TGCTGCCCCGAGTGCCTGCCTCT----- mirL 23 17232
-----TGCTGCCCCGAGTGCCTGCCTC----- mirL 22 12232
-----TGCTGCCCCGAGTGCCTGCCTCTC----- mirL 24 4867
-----TGCTGCCCCGAGTGCCTGCCT----- mirL 21 1977
-----TGCTGCCCCGAGTGCCTGCC----- mirL 20 1756
-----TGCTGCCCCGAGTGCCTGCCTCTCT----- mirL 25 1284
-----TGCTGCCCCGAGTGCCTGC----- mirL 19 780
-----GTCTGCCCCGAGTGCCTGCCTCT----- mirL 22 558
-----GTCTGCCCCGAGTGCCTGCCTCTC----- mirL 23 230
-----CTGTCTGCCCCGAGTGCCTGCCTCT----- mirL 24 162
-----CTGTCTGCCCCGAGTGCCTGCCTC----- mirL 23 151
-----CTGTCTGCCCCGAGTGCCTGCCT----- mirL 22 79
-----GTCTGCCCCGAGTGCCTGCCTC----- mirL 21 73
-----GTCTGCCCCGAGTGCCTGCCT----- mirL 20 55
-----CTGTCTGCCCCGAGTGCCTGCCTCTC----- mirL 25 51
-----CTGTCTGCCCCGAGTGCCTGCC----- mirL 21 44
-----CTGTCTGCCCCGAGTGCCTGC----- mirL 20 39
-----CTGCCCCGAGTGCCTGCCTCT----- mirL 20 36
-----GTCTGCCCCGAGTGCCTGCCTCTCT----- mirL 24 25
-----TCTGTCTGCCCCGAGTGCCTGCC----- mirL 22 24
-----TCTGTCTGCCCCGAGTGCCTGCCT----- mirL 23 23
-----TCTGCCCCGAGTGCCTGCCTCT----- mirL 21 18
-----TCTGTCTGCCCCGAGTGCCTGC----- mirL 21 17
-----CTGTCTGCCCCGAGTGCCT----- mirL 18 15
-----TCTGTCTGCCCCGAGTGCCTGCCTC----- mirL 24 14
-----GTCTGCCCCGAGTGCCTGCC----- mirL 19 12
-----GTCTGCCCCGAGTGCCTGC----- mirL 18 12
-----TCTGTCTGCCCCGAGTGCCTGCCTCT----- mirL 25 11
-----TCTGTCTGCCCCGAGTGC----- mirL 18 11
-----TCTGTCTGCCCCGAGTGCCT----- mirL 19 6
-----CTGCCCCGAGTGCCTGCCTC----- mirL 19 4
-----TCTGCCCCGAGTGCCTGCCTCTC----- mirL 22 3
-----TCTGCCCCGAGTGCCTGCCTC----- mirL 20 2
-----CTGCCCCGAGTGCCTGCCTCTC----- mirL 21 2
-----CTGCCCCGAGTGCCTGCCTCTCT----- mirL 22 1
-----TCTGCCCCGAGTGCCTGCCTCTCT----- mirL 23 1
-----TCTGTTGCTCTGAAGGAGG----- loop 19 1

```

```

-----TCTGTTGCTCTGAAGGAG----- loop 18 1
-----AGGCAGGGGCTGGGCCTGCAG----- mirR 22 6
-----AGGCAGGGGCTGGGCCTGCAG----- mirR 21 2
-----CTGGGCAGAGCTGCTCCTTCGAG morR 23 1
-----CTGGGCAGAGCTGCTCCT----- morR 18 1

```

>mmu-mir-379

| sequence                                                                                            | species | len | reads |
|-----------------------------------------------------------------------------------------------------|---------|-----|-------|
| CGTTCATGGTTCCCTGAAGAGATGGTAGACTATGGAACGTAGGCGTTATGTTTTGACCTATGTAACATGGTCCACTAACTCTCAGTATCCAATCCATCC | morL    | 18  | 3     |
| -----CATGGTTCCCTGAAGAGAT-----                                                                       | morL    | 18  | 2     |
| -----CCATGGTTCCCTGAAGAGA-----                                                                       | morL    | 21  | 2     |
| -----GTTCCATGGTTCCCTGAAGAGA-----                                                                    | morL    | 22  | 1     |
| -----CGTTCATGGTTCCCTGAAGAGA-----                                                                    | morL    | 22  | 1     |
| -----GTTCCATGGTTCCCTGAAGAGAT-----                                                                   | mirL    | 21  | 11067 |
| -----TGGTAGACTATGGAACGTAGG-----                                                                     | mirL    | 22  | 8634  |
| -----TGGTAGACTATGGAACGTAGGC-----                                                                    | mirL    | 20  | 3680  |
| -----TGGTAGACTATGGAACGTAG-----                                                                      | mirL    | 19  | 2317  |
| -----TGGTAGACTATGGAACGTA-----                                                                       | mirL    | 23  | 1168  |
| -----TGGTAGACTATGGAACGTAGGCG-----                                                                   | mirL    | 18  | 1070  |
| -----TGGTAGACTATGGAACGT-----                                                                        | mirL    | 24  | 825   |
| -----TGGTAGACTATGGAACGTAGGCGT-----                                                                  | mirL    | 20  | 308   |
| -----GGTAGACTATGGAACGTAGG-----                                                                      | mirL    | 21  | 227   |
| -----GGTAGACTATGGAACGTAGGC-----                                                                     | mirL    | 18  | 127   |
| -----GGTAGACTATGGAACGTAG-----                                                                       | mirL    | 19  | 103   |
| -----GGTAGACTATGGAACGTAGGCG-----                                                                    | mirL    | 22  | 60    |
| -----ATGGTAGACTATGGAACGTAG-----                                                                     | mirL    | 21  | 38    |
| -----ATGGTAGACTATGGAACGTAGG-----                                                                    | mirL    | 22  | 36    |
| -----GGTAGACTATGGAACGTAGGCGT-----                                                                   | mirL    | 23  | 34    |
| -----ATGGTAGACTATGGAACGTAGGC-----                                                                   | mirL    | 23  | 16    |
| -----GTAGACTATGGAACGTAGG-----                                                                       | mirL    | 19  | 14    |
| -----ATGGTAGACTATGGAACGTAG-----                                                                     | mirL    | 20  | 14    |
| -----ATGGTAGACTATGGAACGT-----                                                                       | mirL    | 19  | 12    |
| -----GTAGACTATGGAACGTAG-----                                                                        | mirL    | 18  | 8     |
| -----ATGGTAGACTATGGAACGTAGGCG-----                                                                  | mirL    | 24  | 5     |
| -----TAGACTATGGAACGTAGG-----                                                                        | mirL    | 18  | 4     |
| -----TAGACTATGGAACGTAGGC-----                                                                       | mirL    | 19  | 3     |
| -----ATGGTAGACTATGGAACG-----                                                                        | mirL    | 18  | 3     |
| -----GGTAGACTATGGAACGTAGGCGTT-----                                                                  | mirL    | 24  | 3     |
| -----AGATGGTAGACTATGGAA-----                                                                        | mirL    | 18  | 2     |
| -----GATGGTAGACTATGGAACGTAG-----                                                                    | mirL    | 21  | 2     |
| -----GATGGTAGACTATGGAACGTAGG-----                                                                   | mirL    | 23  | 1     |
| -----GTAGACTATGGAACGTAGGC-----                                                                      | mirL    | 20  | 1     |
| -----AGATGGTAGACTATGGAACG-----                                                                      | mirL    | 20  | 1     |
| -----TAGACTATGGAACGTAGGCGT-----                                                                     | mirL    | 21  | 1     |
| -----GGCGTTATGTTTTGACC-----                                                                         | loop    | 18  | 4     |
| -----CGTTATGTTTTGACCTA-----                                                                         | loop    | 18  | 1     |

```

-----TATGTAACATGGTCCACTAA----- mirR 20 3207
-----TATGTAACATGGTCCACTAAC----- mirR 21 1519
-----TATGTAACATGGTCCACTAACT----- mirR 22 1416
-----TATGTAACATGGTCCACTA----- mirR 19 1219
-----TATGTAACATGGTCCACTAACTC----- mirR 23 596
-----TATGTAACATGGTCCACT----- mirR 18 322
-----ATGTAACATGGTCCACTAA----- mirR 19 320
-----ATGTAACATGGTCCACTA----- mirR 18 159
-----ATGTAACATGGTCCACTAACT----- mirR 21 137
-----CTATGTAACATGGTCCACTA----- mirR 20 134
-----ATGTAACATGGTCCACTAAC----- mirR 20 128
-----CTATGTAACATGGTCCACT----- mirR 19 41
-----CTATGTAACATGGTCCACTAA----- mirR 21 38
-----ATGTAACATGGTCCACTAACTC----- mirR 22 37
-----TGTAACATGGTCCACTAA----- mirR 18 31
-----CTATGTAACATGGTCCAC----- mirR 18 31
-----GTAACATGGTCCACTAAC----- mirR 18 30
-----TATGTAACATGGTCCACTAACTCT----- mirR 24 24
-----CTATGTAACATGGTCCACTAAC----- mirR 22 16
-----GTAACATGGTCCACTAACT----- mirR 19 14
-----TGTAACATGGTCCACTAACT----- mirR 20 12
-----TGTAACATGGTCCACTAAC----- mirR 19 9
-----GTAACATGGTCCACTAACTC----- mirR 20 6
-----TGTAACATGGTCCACTAACTC----- mirR 21 2
-----ATGTAACATGGTCCACTAACTCT----- mirR 23 2
-----TGTAACATGGTCCACTAACTCT----- mirR 22 1
-----ATGTAACATGGTCCACTAACTCTC----- mirR 24 1
-----CTATGTAACATGGTCCACTAACT----- mirR 23 1
-----CCTATGTAACATGGTCCAC----- mirR 19 1
-----CCTATGTAACATGGTCCA----- mirR 18 1
-----TAACTCTCAGTATCCAAT----- morR 18 1
-----TCAGTATCCAATCCATCC morR 18 1

```

>mmu-mir-497

```

CACCCAGTCCTGCCCCGCCCCAGCAGCACACTGTGGTTTGTACGGCACTGTGGCCACGTCCAACCACACTGTGGTGTAGAGCGAGGGTATGGGAGGCA species len reads
-----CCAGTCCTGCCCCGCCCC----- morL 19 1
-----AGTCCTGCCCCGCCCCA----- morL 18 1
-ACCCAGTCCTGCCCCG----- morL 18 1
CACCCAGTCCTGCCCCG----- morL 19 1
-----CAGCAGCACACTGTGGTTTGT----- mirL 21 25029
-----CAGCAGCACACTGTGGTTTGTAC----- mirL 23 3811
-----CAGCAGCACACTGTGGTTTGT----- mirL 20 2886
-----CAGCAGCACACTGTGGTTTGT----- mirL 22 1141
-----CAGCAGCACACTGTGGTTT----- mirL 19 422
-----AGCAGCACACTGTGGTTTGT----- mirL 20 379
-----CAGCAGCACACTGTGGTT----- mirL 18 346

```

```
-----AGCAGCACACTGTGGTTTGTAC----- mirL 22 296
-----CAGCAGCACACTGTGGTTTGTACG----- mirL 24 227
-----AGCAGCACACTGTGGTTTGT----- mirL 19 124
-----AGCAGCACACTGTGGTTTGT----- mirL 21 47
-----AGCAGCACACTGTGGTTTGTACG----- mirL 23 42
-----GCAGCACACTGTGGTTTGT----- mirL 19 34
-----CCAGCAGCACACTGTGGTTTGT----- mirL 22 32
-----GCAGCACACTGTGGTTTGT----- mirL 18 28
-----CAGCACACTGTGGTTTGT----- mirL 18 23
-----AGCAGCACACTGTGGTTT----- mirL 18 12
-----AGCAGCACACTGTGGTTTGTACGG----- mirL 24 7
-----CCAGCAGCACACTGTGGT----- mirL 18 6
-----GCAGCACACTGTGGTTTGTAC----- mirL 21 6
-----CCCAGCAGCACACTGTGGTTTGT----- mirL 23 4
-----CCAGCAGCACACTGTGGTTTGT----- mirL 23 3
-----CCAGCAGCACACTGTGGTTTGT----- mirL 21 2
-----GCAGCACACTGTGGTTTGTACGGC----- mirL 24 2
-----CCCAGCAGCACACTGTGGTTT----- mirL 21 1
-----GCAGCACACTGTGGTTTGTACG----- mirL 22 1
-----CCCAGCAGCACACTGTGGTTTGT----- mirL 22 1
-----GCAGCACACTGTGGTTTGTACGG----- mirL 23 1
-----CAGCACACTGTGGTTTGTAC----- mirL 20 1
-----CCAGCAGCACACTGTGGTTTGTAC----- mirL 24 1
-----GCAGCACACTGTGGTTTGT----- mirL 20 1
-----CCCCAGCAGCACACTGTGGTTTGT----- mirL 24 1
-----ACGGCACTGTGGCCACGT----- loop 18 1
-----CGGCACTGTGGCCACGTC----- loop 18 1
-----CAAACCACACTGTGGTGTAG----- mirR 22 1144
-----CAAACCACACTGTGGTGTAG----- mirR 21 534
-----CCAAACCACACTGTGGTGTAG----- mirR 22 514
-----TCCAAACCACACTGTGGTGTAG----- mirR 23 381
-----CCAAACCACACTGTGGTGTAG----- mirR 23 227
-----TCCAAACCACACTGTGGTGTAG----- mirR 22 222
-----CCAAACCACACTGTGGTGTAG----- mirR 21 67
-----CAAACCACACTGTGGTGTAGAG----- mirR 23 40
-----TCCAAACCACACTGTGGTGTAG----- mirR 24 38
-----CAAACCACACTGTGGTGTAG----- mirR 20 25
-----TCCAAACCACACTGTGGTGTAG----- mirR 21 18
-----CAAACCACACTGTGGTGTAG----- mirR 19 14
-----CCAAACCACACTGTGGTGTAG----- mirR 20 11
-----TCCAAACCACACTGTGGTGTAG----- mirR 20 11
-----TCCAAACCACACTGTGGTGTAGAG----- mirR 25 10
-----CAAACCACACTGTGGTGTAGAG----- mirR 24 9
-----CCAAACCACACTGTGGTGTAG----- mirR 18 5
-----AAACCACACTGTGGTGTAG----- mirR 21 4
-----CCAAACCACACTGTGGTGTAGAG----- mirR 24 4
```

```

-----AACCACACTGTGGTGTAG----- mirR 19 4
-----AACCACACTGTGGTGTAG----- mirR 20 3
-----CCAAACCACACTGTGGTGT----- mirR 19 3
-----CAAACCACACTGTGGTGT----- mirR 18 3
-----TCCAAACCACACTGTGGT----- mirR 18 3
-----ACCACACTGTGGTGTAG----- mirR 18 2
-----AACCACACTGTGGTGTTA----- mirR 18 2
-----ACCACACTGTGGTGTAGAGCG----- mirR 22 1
-----AAACCACACTGTGGTGTAG----- mirR 20 1
-----AAACCACACTGTGGTGT----- mirR 18 1
-----GCGAGGGTATGGGAGGCA morR 18 6
-----AGCGAGGGTATGGGAGGC- morR 18 2
-----GAGCGAGGGTATGGGAGG-- morR 18 1

```

>mmu-mir-92a-1

```

CACAGGTTGGGATTGTGCGCAATGCTGTGTTTCTCTGTATGGTATTGCACCTGTCCCGCCTGTTGAGTTTGGTGGGGATTG species len reads
---AGGTTGGGATTGTGCGCAATGC----- mirL 22 41
---AGGTTGGGATTGTGCGCAATGCT----- mirL 23 31
---AGGTTGGGATTGTGCGCA----- mirL 18 4
---AGGTTGGGATTGTGCGCAATG----- mirL 21 4
---AGGTTGGGATTGTGCGCAA----- mirL 19 3
CACAGGTTGGGATTGTGTC----- mirL 18 1
-----TATTGCACTTGTCCCGCCTGT----- mirR 22 20017
-----TATTGCACTTGTCCCGCCTGTTG----- mirR 24 4360
-----TATTGCACTTGTCCCGCCTGTT----- mirR 23 3666
-----TATTGCACTTGTCCCGCCTG----- mirR 21 2820
-----TATTGCACTTGTCCCGGCC----- mirR 19 1998
-----TATTGCACTTGTCCCGGC----- mirR 18 1489
-----TATTGCACTTGTCCCGCCT----- mirR 20 1130
-----ATTGCACTTGTCCCGCCTGT----- mirR 21 1086
-----ATTGCACTTGTCCCGCCTG----- mirR 20 459
-----ATTGCACTTGTCCCGCCTGTTG----- mirR 23 345
-----ATTGCACTTGTCCCGCCTGTT----- mirR 22 245
-----ATTGCACTTGTCCCGCCT----- mirR 19 153
-----ATTGCACTTGTCCCGGCC----- mirR 18 92
-----TGCACCTTGTCCCGCCTG----- mirR 18 53
-----TGCACCTTGTCCCGCCTGT----- mirR 19 33
-----TTGCACCTTGTCCCGCCTG----- mirR 19 28
-----TTGCACCTTGTCCCGCCTGT----- mirR 20 22
-----ATTGCACTTGTCCCGCCTGTTGA----- mirR 24 14
-----TTGCACCTTGTCCCGCCT----- mirR 18 6
-----TTGCACCTTGTCCCGCCTGTTG----- mirR 22 5
-----TGCACCTTGTCCCGCCTGTT----- mirR 20 4
-----TTGCACCTTGTCCCGCCTGTT----- mirR 21 3
-----GTATTGCACTTGTCCCGCCTGT----- mirR 23 2
-----GTATTGCACTTGTCCCGCCTGTTG----- mirR 25 1

```

```

-----TGCACCTGTCCCGGCCTGTTG----- mirR 21 1
-----GTATTGCACTTGTCCCGGCC----- mirR 20 1
-----TTGCACCTGTCCCGGCCTGTTGA----- mirR 23 1
-----TGGTATTGCACTTGTCCC----- mirR 18 1
-----TTGAGTTTGGTGGGGATT----- morR 18 1
-----TGAGTTTGGTGGGGATTG----- morR 18 1

>mmu-mir-376c
AAGGTGGATATTCCTTCTATGTTTATGCTTTTGTGATTAACATAGAGGAAATTTACAGTTTTCAGTGTCAAATGCTGCTG species len reads
---GTGGATATTCCTTCTATGTTT----- mirL 21 495
---GTGGATATTCCTTCTATGTT----- mirL 20 403
---GTGGATATTCCTTCTATGTTTA----- mirL 22 327
---GTGGATATTCCTTCTATGT----- mirL 19 133
---GTGGATATTCCTTCTATGTTTAT----- mirL 23 86
---TGGATATTCCTTCTATGTTTA----- mirL 21 27
---TGGATATTCCTTCTATGTTT----- mirL 20 23
---GGTGGATATTCCTTCTATGTT----- mirL 21 15
---GATATTCCTTCTATGTTTA----- mirL 19 14
---GGTGGATATTCCTTCTATGTTT----- mirL 22 13
---GGTGGATATTCCTTCTATGTTTA----- mirL 23 9
---GGTGGATATTCCTTCTATGT----- mirL 20 8
---TGGATATTCCTTCTATGTTTAT----- mirL 22 6
---TGGATATTCCTTCTATGTT----- mirL 19 5
---GGTGGATATTCCTTCTATGTTTAT----- mirL 24 5
---GTGGATATTCCTTCTATGTTTATGC----- mirL 25 4
---GGATATTCCTTCTATGTTT----- mirL 19 3
---TGGATATTCCTTCTATGT----- mirL 18 3
---GGATATTCCTTCTATGTTTA----- mirL 20 2
---AGGTGGATATTCCTTCTATGTTT----- mirL 23 2
---TGGATATTCCTTCTATGTTTATGC----- mirL 24 2
---GATATTCCTTCTATGTTT----- mirL 18 1
---AGGTGGATATTCCTTCTATGT----- mirL 21 1
AAGGTGGATATTCCTTCTATGTT----- mirL 23 1
AAGGTGGATATTCCTTCTATGT----- mirL 22 1
---AGGTGGATATTCCTTCTATGTT----- mirL 22 1
---GATATTCCTTCTATGTTTATG----- mirL 21 1
---GGATATTCCTTCTATGTT----- mirL 18 1
---TGGATATTCCTTCTATGTTTATG----- mirL 23 1
---GATATTCCTTCTATGTTTAT----- mirL 20 1
-----AACATAGAGGAAATTTACAGT----- mirR 21 25547
-----AACATAGAGGAAATTTACAG----- mirR 20 3160
-----AACATAGAGGAAATTTACAGTT----- mirR 22 2989
-----AACATAGAGGAAATTTAC----- mirR 19 1068
-----AACATAGAGGAAATTTCA----- mirR 18 604
-----ACATAGAGGAAATTTACAGTT----- mirR 22 588
-----ACATAGAGGAAATTTACAG----- mirR 19 260

```

```

-----ACATAGAGGAAATTTACGTT----- mirR 20 239
-----AACATAGAGGAAATTTACGTTT----- mirR 23 226
-----ACATAGAGGAAATTTACGTT----- mirR 21 210
-----CATAGAGGAAATTTACG----- mirR 18 57
-----AAACATAGAGGAAATTTACGTT----- mirR 22 52
-----CATAGAGGAAATTTACGTT----- mirR 19 48
-----ACATAGAGGAAATTTAC----- mirR 18 41
-----AACATAGAGGAAATTTACGTTT----- mirR 24 26
-----ATAGAGGAAATTTACGTT----- mirR 18 16
-----ATAGAGGAAATTTACGTTT----- mirR 20 11
-----ACATAGAGGAAATTTACGTTT----- mirR 23 7
-----AAACATAGAGGAAATTTACG----- mirR 21 5
-----AAACATAGAGGAAATTTAC----- mirR 20 4
-----ATAGAGGAAATTTACGTT----- mirR 19 4
-----CATAGAGGAAATTTACGTTT----- mirR 21 2
-----CATAGAGGAAATTTACGTT----- mirR 20 2
-----AAACATAGAGGAAATTT----- mirR 18 2
-----ATAGAGGAAATTTACGTTT----- mirR 21 1
-----TTAAACATAGAGGAAATTTACGTT----- mirR 24 1
-----AAACATAGAGGAAATTTACGTT----- mirR 23 1
-----TAAACATAGAGGAAATTTACG----- mirR 22 1
-----TCAGTGTCAAATGCTGCTG morR 19 1
-----CGTTTTCAGTGTCAAATG----- morR 18 1
-----CGTTTTCAGTGTCAAATGCTG--- morR 21 1

```

>mmu-mir-340

```

TAAAACCAATTGTACTTGGTGTGATTATAAAGCAATGAGACTGATTGTCATATGTCGTTTGTGGGATCCGTCTCAGTTACTTTATAGCCATACCTGGTATCTTAACACCAC species len reads
-----TTGTACTTGGTGTGATTA----- morL 18 1
TAAAACCAATTGTACTTGGTG----- morL 21 1
-----ATTGTACTTGGTGTGATTA----- morL 19 1
-----TTATAAAGCAATGAGACTGATT----- mirL 22 5677
-----TTATAAAGCAATGAGACTGAT----- mirL 21 2873
-----TTATAAAGCAATGAGACTGA----- mirL 20 1571
-----TTATAAAGCAATGAGACTGATTG----- mirL 23 1104
-----TATAAAGCAATGAGACTGATT----- mirL 21 617
-----TTATAAAGCAATGAGACTG----- mirL 19 400
-----ATTATAAAGCAATGAGACTGA----- mirL 21 396
-----TTATAAAGCAATGAGACT----- mirL 18 271
-----TATAAAGCAATGAGACTGAT----- mirL 20 257
-----TATAAAGCAATGAGACTGA----- mirL 19 163
-----TATAAAGCAATGAGACTGATTG----- mirL 22 133
-----ATTATAAAGCAATGAGACTGAT----- mirL 22 110
-----ATAAAGCAATGAGACTGATT----- mirL 20 83
-----TTATAAAGCAATGAGACTGATTGT----- mirL 24 78
-----TAAAGCAATGAGACTGATT----- mirL 19 60
-----ATAAAGCAATGAGACTGA----- mirL 18 48

```



```

-----ATTATAAAGCAATGAGACTG----- mirL 20 32
-----TATAAAGCAATGAGACTG----- mirL 18 27
-----ATAAAGCAATGAGACTGAT----- mirL 19 18
-----ATAAAGCAATGAGACTGATT----- mirL 21 18
-----TAAAGCAATGAGACTGAT----- mirL 18 18
-----ATTATAAAGCAATGAGACTGATT----- mirL 23 15
-----TAAAGCAATGAGACTGATTG----- mirL 20 7
-----TGATTATAAAGCAATGAGACTGATT----- mirL 25 5
-----TATAAAGCAATGAGACTGATTGT----- mirL 23 4
-----ATTATAAAGCAATGAGAC----- mirL 18 4
-----GATTATAAAGCAATGAGACTGATT----- mirL 24 3
-----ATTATAAAGCAATGAGACT----- mirL 19 2
-----ATTATAAAGCAATGAGACTGATTG----- mirL 24 2
-----TAAAGCAATGAGACTGATTGT----- mirL 21 1
-----TGTCATATGTCGTTTGTGGGAT----- loop 22 3
-----GTCATATGTCGTTTGTGGG----- loop 19 2
-----CATATGTCGTTTGTGGGA----- loop 18 2
-----TCATATGTCGTTTGTGGGA----- loop 19 1
-----GTCATATGTCGTTTGTGGGATC----- loop 22 1
-----TCCGTCCTCAGTTACTTTATAGCC----- mirR 23 6026
-----TCCGTCCTCAGTTACTTTATAGCCA----- mirR 24 4727
-----TCCGTCCTCAGTTACTTTATAGCCAT----- mirR 25 4587
-----TCCGTCCTCAGTTACTTTATAGC----- mirR 22 2097
-----TCCGTCCTCAGTTACTTTATAG----- mirR 21 1694
-----TCCGTCCTCAGTTACTTTAT----- mirR 19 746
-----TCCGTCCTCAGTTACTTTATAGCCATA----- mirR 26 678
-----CCGTCCTCAGTTACTTTATAGCC----- mirR 22 397
-----CCGTCCTCAGTTACTTTATAGCCA----- mirR 23 312
-----CCGTCCTCAGTTACTTTATAGCCAT----- mirR 24 252
-----CGTCTCAGTTACTTTATAGCCA----- mirR 22 132
-----CGTCTCAGTTACTTTATAGCCAT----- mirR 23 124
-----CCGTCCTCAGTTACTTTATAG----- mirR 20 98
-----CCGTCCTCAGTTACTTTATAGC----- mirR 21 89
-----CGTCTCAGTTACTTTATAGCC----- mirR 21 59
-----CCGTCCTCAGTTACTTTATAGCCATA----- mirR 25 42
-----GTCTCAGTTACTTTATAGCCAT----- mirR 22 36
-----CGTCTCAGTTACTTTATAGC----- mirR 20 36
-----CCGTCCTCAGTTACTTTAT----- mirR 18 34
-----CGTCTCAGTTACTTTATAG----- mirR 19 30
-----GTCTCAGTTACTTTATAGCCA----- mirR 21 27
-----ATCCGTCCTCAGTTACTTTATAGCC----- mirR 24 22
-----GTCTCAGTTACTTTATAGCC----- mirR 20 20
-----CGTCTCAGTTACTTTATAGCCATA----- mirR 24 19
-----GTCTCAGTTACTTTATAG----- mirR 18 13
-----ATCCGTCCTCAGTTACTTTATAGCCA----- mirR 25 11
-----CGTCTCAGTTACTTTATA----- mirR 18 11

```

```

-----ATCCGTCTCAGTTACTTTATAGC----- mirR 23 11
-----ATCCGTCTCAGTTACTTTAT----- mirR 20 9
-----ATCCGTCTCAGTTACTTTATAG----- mirR 22 6
-----GTCTCAGTTACTTTATAGCCATA----- mirR 23 4
-----ATCCGTCTCAGTTACTTTATA----- mirR 21 4
-----ATCCGTCTCAGTTACTTTA----- mirR 19 3
-----GTCTCAGTTACTTTATAGC----- mirR 19 3
-----GGATCCGTCTCAGTTACTTTATAGC----- mirR 25 1
-----TACCTGGTATCTTAACACCAC morR 21 1
-----TACCTGGTATCTTAACACC-- morR 19 1

```

>mmu-mir-674

| Species | len | reads |
|---------|-----|-------|
| morL    | 19  | 12    |
| morL    | 20  | 7     |
| morL    | 20  | 4     |
| morL    | 18  | 3     |
| morL    | 22  | 3     |
| morL    | 20  | 2     |
| morL    | 19  | 2     |
| morL    | 21  | 1     |
| morL    | 18  | 1     |
| morL    | 18  | 1     |
| mirL    | 21  | 2415  |
| mirL    | 23  | 1684  |
| mirL    | 22  | 1339  |
| mirL    | 20  | 646   |
| mirL    | 19  | 401   |
| mirL    | 24  | 187   |
| mirL    | 18  | 147   |
| mirL    | 22  | 127   |
| mirL    | 23  | 34    |
| mirL    | 21  | 29    |
| mirL    | 20  | 27    |
| mirL    | 22  | 26    |
| mirL    | 20  | 15    |
| mirL    | 19  | 14    |
| mirL    | 21  | 9     |
| mirL    | 19  | 9     |
| mirL    | 24  | 8     |
| mirL    | 19  | 8     |
| mirL    | 25  | 6     |
| mirL    | 19  | 5     |
| mirL    | 20  | 5     |
| mirL    | 18  | 4     |
| mirL    | 18  | 2     |

```

-----CACTGAGATGGGAGTGGTGTAAAG----- mirL 24 2
-----CACTGAGATGGGAGTGGTGTAAAG----- mirL 23 1
-----CTGAGATGGGAGTGGTGTAAAG----- mirL 21 1
-----ACTGAGATGGGAGTGGTG----- mirL 18 1
-----GTAAGGCTCAGGTATGCA----- loop 18 1
-----CACAGCTCCCATCTCAGAACAA----- mirR 22 13004
-----CACAGCTCCCATCTCAGAACA----- mirR 21 7054
-----CACAGCTCCCATCTCAGAAC----- mirR 20 5353
-----CACAGCTCCCATCTCAGAACAAG----- mirR 23 1351
-----CACAGCTCCCATCTCAGAA----- mirR 19 778
-----CACAGCTCCCATCTCAGA----- mirR 18 221
-----ACAGCTCCCATCTCAGAACAA----- mirR 21 204
-----CACAGCTCCCATCTCAGAACAAG----- mirR 24 135
-----AGCTCCCATCTCAGAACAA----- mirR 19 75
-----ACAGCTCCCATCTCAGAACA----- mirR 20 72
-----CAGCTCCCATCTCAGAACAA----- mirR 20 51
-----ACAGCTCCCATCTCAGAACAAG----- mirR 22 45
-----ACAGCTCCCATCTCAGAAC----- mirR 19 30
-----AGCTCCCATCTCAGAACA----- mirR 18 25
-----CAGCTCCCATCTCAGAACA----- mirR 19 19
-----GCACAGCTCCCATCTCAGAACAA----- mirR 23 11
-----CAGCTCCCATCTCAGAAC----- mirR 18 9
-----ACAGCTCCCATCTCAGAA----- mirR 18 6
-----GCACAGCTCCCATCTCAGAAC----- mirR 21 6
-----CAGCTCCCATCTCAGAACAAG----- mirR 21 5
-----ACAGCTCCCATCTCAGAACAAG----- mirR 23 5
-----GCACAGCTCCCATCTCAGAACA----- mirR 22 5
-----TGCACAGCTCCCATCTCAGAACAA----- mirR 24 4
-----GCACAGCTCCCATCTCAGAA----- mirR 20 2
-----TGCACAGCTCCCATCTCAG----- mirR 19 1
-----TGCACAGCTCCCATCTCAGAAC----- mirR 22 1
-----AGCTCCCATCTCAGAACAAG----- mirR 21 1
-----TGCACAGCTCCCATCTCAGAACA----- mirR 23 1
-----CAGCTCCCATCTCAGAACAAGGCTC----- mirR 25 1
-----ATGCACAGCTCCCATCTCAGAACA----- mirR 24 1
-----AGCTCCCATCTCAGAACAAG----- mirR 20 1
-----TCGGGTGTGCTCAGCTCC morR 18 1

>mmu-mir-335
AAGATTTCTTTTGGGCGGGGTCAAGAGCAATAACGAAAAATGTTTGTTTTCGTAAACCGTTTTTCATTATTGCTCCTGACCCCTCTCATGGGTATAGCCA species len reads
----TTTCTTTTGGGCGGGGT----- morL 18 2
AAGATTTCTTTTGGGCGGGGT----- morL 22 1
-----TCAAGAGCAATAACGAAAAATGT----- mirL 23 16887
-----AAGAGCAATAACGAAAAATGT----- mirL 21 2152
-----TCAAGAGCAATAACGAAAA----- mirL 19 1839
-----TCAAGAGCAATAACGAAAA----- mirL 20 1495

```

```

-----TCAAGAGCAATAACGAAAAATG----- mirL 22 1482
-----TCAAGAGCAATAACGAAAAAT----- mirL 21 1296
-----CAAGAGCAATAACGAAAAATGT----- mirL 22 946
-----TCAAGAGCAATAACGAAAAATGTT----- mirL 24 835
-----AAGAGCAATAACGAAAAATGTT----- mirL 22 646
-----TCAAGAGCAATAACGAAA----- mirL 18 508
-----AAGAGCAATAACGAAAAATGTTT----- mirL 23 191
-----AGAGCAATAACGAAAAATGT----- mirL 20 95
-----CAAGAGCAATAACGAAAAATG----- mirL 21 83
-----CAAGAGCAATAACGAAAAAT----- mirL 20 79
-----AAGAGCAATAACGAAAAATG----- mirL 20 70
-----CAAGAGCAATAACGAAAA----- mirL 19 70
-----CAAGAGCAATAACGAAAA----- mirL 18 70
-----CAAGAGCAATAACGAAAAATGTT----- mirL 23 53
-----AAGAGCAATAACGAAAA----- mirL 18 40
-----AGAGCAATAACGAAAAATGTT----- mirL 22 38
-----AAGAGCAATAACGAAAAAT----- mirL 19 30
-----AAGAGCAATAACGAAAAATGTTTG----- mirL 24 28
-----AGAGCAATAACGAAAAATG----- mirL 19 17
-----AGAGCAATAACGAAAAATGTT----- mirL 21 14
-----CAAGAGCAATAACGAAAAATGTTT----- mirL 24 11
-----GTCAAGAGCAATAACGAAAAATGT----- mirL 24 7
-----AGAGCAATAACGAAAAATGTTTG----- mirL 23 7
-----AGAGCAATAACGAAAAATGTTTGT----- mirL 24 3
-----GTCAAGAGCAATAACGAAAAATGTT----- mirL 25 3
-----GTCAAGAGCAATAACGAAAA----- mirL 21 2
-----AGAGCAATAACGAAAAAT----- mirL 18 1
-----TGTTTTTCGTAAACCGTTT----- loop 19 2
-----TTTGTTTTTTCGTAAACCG----- loop 18 1
-----TTTTTCATTATTGCTCCTGACC----- mirR 22 1219
-----GTTTTTCATTATTGCTCCTGACC----- mirR 23 1177
-----GTTTTTCATTATTGCTCCTGAC----- mirR 22 715
-----TTTTTCATTATTGCTCCTGAC----- mirR 21 660
-----GTTTTTCATTATTGCTCCTGACCC----- mirR 24 377
-----TTTTTCATTATTGCTCCTGACCC----- mirR 23 367
-----TTTTTCATTATTGCTCCTGACC----- mirR 21 199
-----TTTTTCATTATTGCTCCTGA----- mirR 20 174
-----CCGTTTTTCATTATTGCTCCTG----- mirR 22 161
-----GTTTTTCATTATTGCTCCTGA----- mirR 21 152
-----TTTTTCATTATTGCTCCTGAC----- mirR 20 131
-----GTTTTTCATTATTGCTCCTGACCCC----- mirR 25 115
-----CGTTTTTCATTATTGCTCCTGA----- mirR 22 99
-----TTTTTCATTATTGCTCCTG----- mirR 19 92
-----CCGTTTTTCATTATTGCTCCT----- mirR 21 75
-----CGTTTTTCATTATTGCTCCTGAC----- mirR 23 73
-----TTTTTCATTATTGCTCCT----- mirR 18 65

```

```

-----TTTTTCATTATTGCTCCTGACCCC----- mirR 24 64
-----GTTTTTCATTATTGCTCCTG----- mirR 20 62
-----CCGTTTTTCATTATTGCTCCTGA----- mirR 23 59
-----GTTTTTCATTATTGCTCC----- mirR 18 54
-----TTTTTCATTATTGCTCCTGA----- mirR 19 38
-----TTTCATTATTGCTCCTGACC----- mirR 20 38
-----TTTTTCATTATTGCTCCTGACCC----- mirR 22 37
-----TTCATTATTGCTCCTGACC----- mirR 19 33
-----TTTTTCATTATTGCTCCTG----- mirR 18 27
-----CGTTTTTCATTATTGCTCCTG----- mirR 21 27
-----TTTCATTATTGCTCCTGAC----- mirR 19 26
-----TTTCATTATTGCTCCTGACCC----- mirR 21 17
-----TTCATTATTGCTCCTGAC----- mirR 18 15
-----TTTTTCATTATTGCTCCTGACCCC----- mirR 23 14
-----TTTCATTATTGCTCCTGA----- mirR 18 14
-----CCGTTTTTCATTATTGCTCCTGACC----- mirR 25 13
-----CCGTTTTTCATTATTGCTCC----- mirR 20 10
-----TTCATTATTGCTCCTGACCC----- mirR 20 10
-----CGTTTTTCATTATTGCTCCTGACC----- mirR 24 8
-----TTTCATTATTGCTCCTGACCCC----- mirR 22 8
-----CCGTTTTTCATTATTGCTCCTGAC----- mirR 24 6
-----CCGTTTTTCATTATTGCTC----- mirR 19 6
-----CGTTTTTCATTATTGCTCC----- mirR 19 6
-----CGTTTTTCATTATTGCTCCT----- mirR 20 3
-----TTCATTATTGCTCCTGACCCC----- mirR 22 2
-----TTTCATTATTGCTCCTGACCCC----- mirR 23 1
-----CGTTTTTCATTATTGCTCCTGACCC----- mirR 25 1
-----CTCTCATGGGTTATAGCCA morR 19 1
-----ACCCCTCTCATGGGTTA----- morR 18 1

>mmu-mir-20b
AAGCTCGGATCCTAGTAGTGCCAAAGTGCTCATAGTGCAGGTAGTTTTTATACCACTCTACTGCAGTGTGAGCACTTCTAGTACTCCTGGATCAACCAAGGT species len reads
AAGCTCGGATCCTAGTAGTG----- morL 20 1
-----CGGATCCTAGTAGTGCCA----- morL 18 1
-----CAAAGTGCTCATAGTGCAGGTAG----- mirL 23 6297
-----CAAAGTGCTCATAGTGCAGGT----- mirL 21 3939
-----CAAAGTGCTCATAGTGCAGGTA----- mirL 22 1938
-----CAAAGTGCTCATAGTGCAG----- mirL 19 1860
-----CAAAGTGCTCATAGTGCAGGTAGT----- mirL 24 990
-----CAAAGTGCTCATAGTGCAGG----- mirL 20 426
-----AGTGCTCATAGTGCAGGT----- mirL 18 177
-----AGTGCTCATAGTGCAGGTAG----- mirL 20 163
-----AAAGTGCTCATAGTGCAGGTAG----- mirL 22 162
-----AAGTGCTCATAGTGCAGGTAG----- mirL 21 124
-----AAGTGCTCATAGTGCAGGT----- mirL 19 93
-----AGTGCTCATAGTGCAGGTA----- mirL 19 89

```

```

-----AAAGTGCTCATAGTGCAGGTA----- mirL 21 76
-----CAAAGTGCTCATAGTGCA----- mirL 18 66
-----AAAGTGCTCATAGTGCAGGT----- mirL 20 54
-----AAGTGCTCATAGTGCAGGTA----- mirL 20 51
-----AAAGTGCTCATAGTGCAG----- mirL 18 39
-----AAAGTGCTCATAGTGCAGGTAGT----- mirL 23 22
-----AGTGCTCATAGTGCAGGTAGT----- mirL 21 16
-----AAAGTGCTCATAGTGCAGG----- mirL 19 13
-----CCAAAGTGCTCATAGTGCAGGTAG----- mirL 24 10
-----AAGTGCTCATAGTGCAGG----- mirL 18 10
-----AAGTGCTCATAGTGCAGGTAGT----- mirL 22 9
-----CCAAAGTGCTCATAGTGCAGGT----- mirL 22 3
-----CCAAAGTGCTCATAGTGCAGGTA----- mirL 23 3
-----AAAGTGCTCATAGTGCAGGTAGTT----- mirL 24 2
-----CCAAAGTGCTCATAGTGCAGGTAGT----- mirL 25 1
-----AGTGCTCATAGTGCAGGTAGTT----- mirL 22 1
-----ACTGCAGTGTGAGCACTTCTA----- mirR 21 9124
-----ACTGCAGTGTGAGCACTTCTAG----- mirR 22 5668
-----ACTGCAGTGTGAGCACTTCT----- mirR 20 1927
-----ACTGCAGTGTGAGCACTTC----- mirR 19 520
-----ACTGCAGTGTGAGCACTTCTAGT----- mirR 23 456
-----ACTGCAGTGTGAGCACTT----- mirR 18 284
-----CTGCAGTGTGAGCACTTCTA----- mirR 20 124
-----CTGCAGTGTGAGCACTTCTAG----- mirR 21 94
-----GCAGTGTGAGCACTTCTA----- mirR 18 64
-----GCAGTGTGAGCACTTCTAG----- mirR 19 34
-----ACTGCAGTGTGAGCACTTCTAGTA----- mirR 24 27
-----CTGCAGTGTGAGCACTTCT----- mirR 19 19
-----CTGCAGTGTGAGCACTTC----- mirR 18 12
-----TGCAGTGTGAGCACTTCTA----- mirR 19 12
-----CTGCAGTGTGAGCACTTCTAGT----- mirR 22 12
-----TACTGCAGTGTGAGCACTTCTAG----- mirR 23 9
-----TACTGCAGTGTGAGCACTTCTA----- mirR 22 9
-----TGCAGTGTGAGCACTTCT----- mirR 18 8
-----TACTGCAGTGTGAGCACTTCT----- mirR 21 1
-----GCAGTGTGAGCACTTCTAGT----- mirR 20 1
-----GCAGTGTGAGCACTTCTAGTA----- mirR 21 1
-----CTACTGCAGTGTGAGCACTTCTA----- mirR 23 1
-----ACTCCTGGATCAACCAAG----- morR 18 1
-----TAGTACTCCTGGATCAAC----- morR 18 1
-----CTCCTGGATCAACCAAGGT----- morR 19 1

>mmu-mir-20a
GATGTGACAGCTTCTGTAGCACTAAAGTGCTTATAGTGCAGGTAGTGTGTAGCCATCTACTGCATTACGAGCACTTAAAGTACTGCCAGCTGTAGAACTCCAGCCTCGC species len reads
-ATGTGACAGCTTCTGTAG----- morL 18 1
-ATGTGACAGCTTCTGTAGCA----- morL 20 1

```

|                                     |      |    |       |
|-------------------------------------|------|----|-------|
| GATGTGACAGCTTCTGTAGCAC              | morL | 22 | 1     |
| -----TAAAGTGCTTATAGTGCAGGTAG-----   | mirL | 23 | 14452 |
| -----TAAAGTGCTTATAGTGCAGGTA-----    | mirL | 22 | 4116  |
| -----TAAAGTGCTTATAGTGCAGGT-----     | mirL | 21 | 4036  |
| -----TAAAGTGCTTATAGTGCAGGTAGT-----  | mirL | 24 | 3039  |
| -----AAAGTGCTTATAGTGCAGGTAG-----    | mirL | 22 | 1645  |
| -----TAAAGTGCTTATAGTGCAG-----       | mirL | 19 | 734   |
| -----TAAAGTGCTTATAGTGCAGG-----      | mirL | 20 | 448   |
| -----AAAGTGCTTATAGTGCAGGTAGT-----   | mirL | 23 | 377   |
| -----TAAAGTGCTTATAGTGCAGGTAGTG----- | mirL | 25 | 344   |
| -----AAAGTGCTTATAGTGCAGGT-----      | mirL | 20 | 254   |
| -----AAAGTGCTTATAGTGCAGGTA-----     | mirL | 21 | 204   |
| -----AGTGCTTATAGTGCAGGTA-----       | mirL | 19 | 130   |
| -----AAGTGCTTATAGTGCAGGTA-----      | mirL | 20 | 77    |
| -----AAGTGCTTATAGTGCAGGTAG-----     | mirL | 21 | 73    |
| -----AGTGCTTATAGTGCAGGTAG-----      | mirL | 20 | 61    |
| -----AAAGTGCTTATAGTGCAG-----        | mirL | 18 | 54    |
| -----AGTGCTTATAGTGCAGGT-----        | mirL | 18 | 52    |
| -----AAAGTGCTTATAGTGCAGG-----       | mirL | 19 | 40    |
| -----AAGTGCTTATAGTGCAGGT-----       | mirL | 19 | 22    |
| -----AAGTGCTTATAGTGCAGGTAGT-----    | mirL | 22 | 13    |
| -----AAAGTGCTTATAGTGCAGGTAGTG-----  | mirL | 24 | 7     |
| -----AGTGCTTATAGTGCAGGTAGT-----     | mirL | 21 | 7     |
| -----AAGTGCTTATAGTGCAGG-----        | mirL | 18 | 6     |
| -----CTAAAGTGCTTATAGTGCAGGTAG-----  | mirL | 24 | 6     |
| -----CTAAAGTGCTTATAGTGCAGGTA-----   | mirL | 23 | 2     |
| -----CTAAAGTGCTTATAGTGCAGGTAGT----- | mirL | 25 | 2     |
| -----CTAAAGTGCTTATAGTGCAG-----      | mirL | 20 | 1     |
| -----CTAAAGTGCTTATAGTGCAGGT-----    | mirL | 22 | 1     |
| -----CACTAAAGTGCTTATAGT-----        | mirL | 18 | 1     |
| -----ACTAAAGTGCTTATAGTGCAG-----     | mirL | 21 | 1     |
| -----ACTAAAGTGCTTATAGTGCAGGTAG----- | mirL | 25 | 1     |
| -----TAGTGTGTAGCCATCTAC-----        | loop | 18 | 2     |
| -----TAGTGTGTAGCCATCTACT-----       | loop | 19 | 1     |
| -----ACTGCATTACGAGCACTTAAA-----     | mirR | 21 | 1347  |
| -----ACTGCATTACGAGCACTTA-----       | mirR | 19 | 664   |
| -----ACTGCATTACGAGCACTTAA-----      | mirR | 20 | 502   |
| -----ACTGCATTACGAGCACTT-----        | mirR | 18 | 413   |
| -----ACTGCATTACGAGCACTTAAAG-----    | mirR | 22 | 168   |
| -----ACTGCATTACGAGCACTTAAAGT-----   | mirR | 23 | 33    |
| -----CTGCATTACGAGCACTTAAA-----      | mirR | 20 | 10    |
| -----CTGCATTACGAGCACTTA-----        | mirR | 18 | 10    |
| -----ACTGCATTACGAGCACTTAAAGTA-----  | mirR | 24 | 8     |
| -----CTGCATTACGAGCACTTAA-----       | mirR | 19 | 8     |
| -----GCATTACGAGCACTTAAA-----        | mirR | 18 | 7     |
| -----CTACTGCATTACGAGCACTTAA-----    | mirR | 22 | 4     |

```

-----TGCATTACGAGCACTTAA----- mirR 18 3
-----CTACTGCATTACGAGCAC----- mirR 18 1
-----GCATTACGAGCACTTAAAGT----- mirR 20 1
-----GCATTACGAGCACTTAAAG----- mirR 19 1
-----CTGCATTACGAGCACTTAAAG----- mirR 21 1
-----ACTGCCAGCTGTAGAACTCCA----- morR 21 2
-----ACTGCCAGCTGTAGAACTCC----- morR 20 1
-----ACTGCCAGCTGTAGAACT----- morR 18 1
-----AAAGTACTGCCAGCTGTA----- morR 18 1
-----AAAGTACTGCCAGCTGTAGA----- morR 20 1
-----ACTGCCAGCTGTAGAACTCCAGCCTCGC morR 28 1

```

>mmu-mir-362

```

CTTCTTGCTTGCTCCCCCTCTCGAATCCTTGGAACCTAGGTGTGAATGTGCTTCAAGGATTCAAA species len reads
--TCTTGCTTGCTCCCCCTC----- morL 18 2
---CTTGCTTGCTCCCCCTCT----- morL 18 2
---CTTGCTCCCCCTCTCGAAT----- morL 19 1
CTTCTTGCTTGCTCCCCCTC----- morL 20 1
--TCTTGCTTGCTCCCCCTCT----- morL 19 1
CTTCTTGCTTGCTCCCCCTCT----- morL 21 1
-----AATCCTTGGAACCTAGGTGTGA----- mirL 22 8558
-----AATCCTTGGAACCTAGGTGTGAA----- mirL 23 4879
-----AATCCTTGGAACCTAGGTGTGAAT----- mirL 24 2080
-----AATCCTTGGAACCTAGGTGTG----- mirL 21 1753
-----AATCCTTGGAACCTAGGTGTGAATGC----- mirL 26 904
-----AATCCTTGGAACCTAGGTGT----- mirL 20 873
-----AATCCTTGGAACCTAGGTGTGAATG----- mirL 25 601
-----ATCCTTGGAACCTAGGTGTGAA----- mirL 21 128
-----ATCCTTGGAACCTAGGTGTGAA----- mirL 22 84
-----TCCTTGGAACCTAGGTGTGA----- mirL 20 36
-----ATCCTTGGAACCTAGGTGTGAAT----- mirL 23 30
-----TCCTTGGAACCTAGGTGTGAA----- mirL 21 28
-----TCCTTGGAACCTAGGTGTG----- mirL 19 22
-----CCTTGGAACCTAGGTGTGA----- mirL 19 19
-----ATCCTTGGAACCTAGGTGTG----- mirL 20 15
-----CCTTGGAACCTAGGTGTG----- mirL 18 14
-----ATCCTTGGAACCTAGGTGT----- mirL 19 14
-----CCTTGGAACCTAGGTGTGAA----- mirL 20 6
-----CCTTGGAACCTAGGTGTGAAT----- mirL 21 5
-----TCCTTGGAACCTAGGTGTGAAT----- mirL 22 4
-----ATCCTTGGAACCTAGGTGTGAATGC----- mirL 25 3
-----TCCTTGGAACCTAGGTGT----- mirL 18 3
-----GAATCCTTGGAACCTAGGTGTGAA----- mirL 24 3
-----TCCTTGGAACCTAGGTGTGAATG----- mirL 23 2
-----ATCCTTGGAACCTAGGTGT----- mirL 18 2
-----CCTTGGAACCTAGGTGTGAATG----- mirL 22 2

```



```

-----TCGAATCCTTGGAACCTAGGT----- mirL 21 1
-----GAATCCTTGGAACCTAGGTGTG----- mirL 22 1
-----TGAATGCTGCTTCAGTGC----- loop 18 3
-----ATGCTGCTTCAGTGCAAC----- loop 18 1
-----AATGCTGCTTCAGTGCAAC----- loop 19 1
-----GAATGCTGCTTCAGTGCA----- loop 18 1
-----AACACACCTGTTCAAGGATTCA-- mirR 22 6495
-----AACACACCTGTTCAAGGATTCAA- mirR 23 3771
-----AACACACCTGTTCAAGGATTC--- mirR 21 1724
-----AACACACCTGTTCAAGGATT--- mirR 20 331
-----ACACCTGTTCAAGGATTCA-- mirR 19 72
-----AACACACCTGTTCAAGGAT---- mirR 19 69
-----ACACACCTGTTCAAGGATTCA-- mirR 21 68
-----CACACCTGTTCAAGGATTCA-- mirR 20 59
-----AACACACCTGTTCAAGGA----- mirR 18 33
-----AACACACCTGTTCAAGGATTCAAA mirR 24 29
-----CACACCTGTTCAAGGATTC--- mirR 19 16
-----ACACACCTGTTCAAGGATTC--- mirR 20 16
-----CAACACACCTGTTCAAGGATTCAA- mirR 24 14
-----ACACCTGTTCAAGGATTC--- mirR 18 13
-----CAACACACCTGTTCAAGGATTCA-- mirR 23 13
-----ACACACCTGTTCAAGGATTCAA- mirR 22 12
-----CAACACACCTGTTCAAGGATTC--- mirR 22 11
-----ACACCTGTTCAAGGATTCAA- mirR 20 8
-----CACACCTGTTCAAGGATT--- mirR 18 8
-----ACACACCTGTTCAAGGATT--- mirR 19 6
-----CACACCTGTTCAAGGATTCAA- mirR 21 3
-----ACACACCTGTTCAAGGAT---- mirR 18 2
-----TGCAACACACCTGTTCAA----- mirR 18 1
-----CAACACACCTGTTCAAGGAT---- mirR 20 1
-----GCAACACACCTGTTCAAGG----- mirR 19 1
-----GCAACACACCTGTTCAAG----- mirR 18 1
-----CAACACACCTGTTCAAGGATT--- mirR 21 1
-----TGCAACACACCTGTTCAAGGATTCA-- mirR 25 1
-----CAACACACCTGTTCAAGGA----- mirR 19 1

```

>mmu-mir-324

```

GAAGAGAAGTACTGACTATGCCTCCTCGCATCCCCTAGGGCATTGGTGTAAGCTGGAGACCCACTGCCCCAGGTGCTGCTGGGGTTGTAGTCTGACCCAA species len reads
-----GAACTGACTATGCCTCCT----- morL 18 7
-----AGAAGTACTGACTATGCCTCCT----- morL 19 6
-----GAGAAGTACTGACTATGCCTCCT----- morL 20 4
-----GAACTGACTATGCCTCCTC----- morL 19 3
-----AGAGAAGTACTGACTATGCCTCCT----- morL 21 2
-----AAGAGAAGTACTGACTATGCCTCCT----- morL 22 2
GAAGAGAAGTACTGACTATGCCTCCT----- morL 23 2
-----AGAAGTACTGACTATGCCTCC----- morL 18 2

```

```

-----AACTGACTATGCCTCCTCG----- morL 19 1
-AAGAGAACTGACTATGCCT----- morL 19 1
-AAGAGAACTGACTATGCCTCCTCG----- morL 24 1
---GAGAACTGACTATGCCTCCTC----- morL 21 1
---GAGAACTGACTATGCCTC----- morL 18 1
---GAGAACTGACTATGCCTCC----- morL 19 1
-----CGCATCCCCTAGGGCATTGG----- mirL 20 6468
-----CGCATCCCCTAGGGCATTGGTGT----- mirL 23 6330
-----CGCATCCCCTAGGGCATTGGT----- mirL 21 3992
-----CGCATCCCCTAGGGCATTGGTG----- mirL 22 3493
-----CGCATCCCCTAGGGCATTG----- mirL 19 2937
-----CGCATCCCCTAGGGCATTGGTGTA----- mirL 24 1359
-----CGCATCCCCTAGGGCATT----- mirL 18 535
-----GCATCCCCTAGGGCATTGG----- mirL 19 29
-----CATCCCCTAGGGCATTGG----- mirL 18 28
-----GCATCCCCTAGGGCATTG----- mirL 18 15
-----GCATCCCCTAGGGCATTGGTGT----- mirL 22 10
-----GCATCCCCTAGGGCATTGGTG----- mirL 21 6
-----ATCCCCTAGGGCATTGGT----- mirL 18 5
-----GCATCCCCTAGGGCATTGGT----- mirL 20 5
-----TCGCATCCCCTAGGGCATTGGT----- mirL 22 4
-----GCATCCCCTAGGGCATTGGTGTA----- mirL 23 4
-----TCGCATCCCCTAGGGCATTGGTGT----- mirL 24 4
-----ATCCCCTAGGGCATTGGTG----- mirL 19 3
-----TCGCATCCCCTAGGGCATTGG----- mirL 21 3
-----CATCCCCTAGGGCATTGGTGTA----- mirL 22 2
-----GCATCCCCTAGGGCATTGGTGTA--- mirL 25 2
-----CTCGCATCCCCTAGGGCATTGG----- mirL 22 2
-----CATCCCCTAGGGCATTGGT----- mirL 19 1
-----CTCGCATCCCCTAGGGCATTGGTGT----- mirL 25 1
-----CATCCCCTAGGGCATTGGTGT----- mirL 21 1
-----CTCGCATCCCCTAGGGCATTGGT----- mirL 23 1
-----ATCCCCTAGGGCATTGGTGTA----- mirL 21 1
-----TCGCATCCCCTAGGGCATTG----- mirL 20 1
-----CATCCCCTAGGGCATTGGTGTAAGC----- mirL 26 1
-----ATCCCCTAGGGCATTGGTGT----- mirL 20 1
-----CCACTGCCCCAGGTGCTGCT----- mirR 20 1134
-----CCACTGCCCCAGGTGCTGCTGG----- mirR 22 794
-----ACTGCCCCAGGTGCTGCTGGG----- mirR 21 717
-----CCACTGCCCCAGGTGCTGC----- mirR 19 704
-----ACTGCCCCAGGTGCTGCTGGGG----- mirR 22 657
-----CCACTGCCCCAGGTGCTGCTG----- mirR 21 644
-----ACTGCCCCAGGTGCTGCTGG----- mirR 20 610
-----ACTGCCCCAGGTGCTGCTG----- mirR 19 548
-----ACTGCCCCAGGTGCTGCTGGGG----- mirR 23 473
-----CCACTGCCCCAGGTGCTGCTGGG----- mirR 23 335

```

```

-----ACTGCCCCAGGTGCTGCT----- mirR 18 256
-----CCACTGCCCCAGGTGCTG----- mirR 18 252
-----CCACTGCCCCAGGTGCTGCTGGGG----- mirR 24 94
-----ACTGCCCCAGGTGCTGCTGGGGGT----- mirR 24 60
-----CACTGCCCCAGGTGCTGCT----- mirR 19 11
-----CACTGCCCCAGGTGCTGC----- mirR 18 9
-----CACTGCCCCAGGTGCTGCTGG----- mirR 21 9
-----CTGCCCCAGGTGCTGCTGGGGG----- mirR 22 8
-----CTGCCCCAGGTGCTGCTGG----- mirR 19 5
-----CTGCCCCAGGTGCTGCTGGGGGT----- mirR 23 4
-----CTGCCCCAGGTGCTGCTGGG----- mirR 20 3
-----CTGCCCCAGGTGCTGCTGGGG----- mirR 21 3
-----CCCCTGCCCCAGGTGCTGC----- mirR 20 3
-----CACTGCCCCAGGTGCTGCTGGG----- mirR 22 2
-----CCCCTGCCCCAGGTGCTGCTGG----- mirR 23 2
-----CCCCTGCCCCAGGTGCT----- mirR 18 2
-----CTGCCCCAGGTGCTGCTG----- mirR 18 2
-----CACTGCCCCAGGTGCTGCTG----- mirR 20 1
-----CACTGCCCCAGGTGCTGCTGGGGGT----- mirR 25 1
-----CACTGCCCCAGGTGCTGCTGGGGGT----- mirR 26 1
-----CCCCTGCCCCAGGTGCTGCTG----- mirR 22 1
-----GGGGTTGTAGTCTGACCC----- morR 18 2
-----GGGGTTGTAGTCTGACC----- morR 18 1
-----GGGGTTGTAGTCTGACCCA----- morR 19 1
-----GGTTGTAGTCTGACCCAA----- morR 18 1

```

>mmu-mir-664

```

AGACTTTGGAACATTGAAGCTGGCTGGGGAAAATGACTGGATAGAAAACATTATCTATTCACTTACTCCCCAGCCTACACATGAAAGCAATAACAGCACAA species len reads
AGACTTTGGAACATTGAA----- morL 18 1
-----CTGGCTGGGGAAAATGACTGGA----- mirL 22 104
-----CTGGCTGGGGAAAATGACTGG----- mirL 21 89
-----GCTGGCTGGGGAAAATGACTGG----- mirL 22 74
-----CTGGCTGGGGAAAATGACTGGAT----- mirL 23 55
-----GCTGGCTGGGGAAAATGACTG----- mirL 21 30
-----GCTGGCTGGGGAAAATGACTGGAT----- mirL 24 28
-----CTGGCTGGGGAAAATGACTG----- mirL 20 26
-----TGGCTGGGGAAAATGACTGG----- mirL 20 24
-----CTGGCTGGGGAAAATGACT----- mirL 19 23
-----CTGGCTGGGGAAAATGACTGGATA----- mirL 24 21
-----GCTGGCTGGGGAAAATGACT----- mirL 20 20
-----GCTGGCTGGGGAAAATGACTGGA----- mirL 23 19
-----TGGCTGGGGAAAATGACTGGAT----- mirL 22 11
-----TGGCTGGGGAAAATGACTGGA----- mirL 21 10
-----GCTGGCTGGGGAAAATGACTGGATA----- mirL 25 6
-----CTGGCTGGGGAAAATGACTGGATAG----- mirL 25 4
-----GCTGGCTGGGGAAAATGA----- mirL 18 4

```

```
-----AGCTGGCTGGGGAAAATGACTG----- mirL 22 3
-----AGCTGGCTGGGGAAAATGACTGG----- mirL 23 3
-----TGGCTGGGGAAAATGACTGGATA----- mirL 23 3
-----AGCTGGCTGGGGAAAATGACT----- mirL 21 2
-----AGCTGGCTGGGGAAAATGACTGGAT----- mirL 25 2
-----TGGCTGGGGAAAATGACT----- mirL 18 1
-----AAGCTGGCTGGGGAAAAT----- mirL 18 1
-----TGGCTGGGGAAAATGACTGGATAG----- mirL 24 1
-----AGCTGGCTGGGGAAAATGAC----- mirL 20 1
-----TGGCTGGGGAAAATGACTG----- mirL 19 1
-----AAGCTGGCTGGGGAAAATGA----- mirL 20 1
-----TATTCATTTACTCCCCAGCCTAC----- mirR 23 12585
-----TATTCATTTACTCCCCAGCCTA----- mirR 22 5379
-----TATTCATTTACTCCCCAGCCTACACA----- mirR 24 4475
-----TATTCATTTACTCCCCAGCCT----- mirR 21 3174
-----ATTCATTTACTCCCCAGCCTAC----- mirR 22 1568
-----TATTCATTTACTCCCCAGCCTACAC----- mirR 25 881
-----ATTCATTTACTCCCCAGCCTACACA----- mirR 23 691
-----ATTCATTTACTCCCCAGCCTA----- mirR 21 665
-----TATTCATTTACTCCCCAG----- mirR 18 487
-----TATTCATTTACTCCCCAGCC----- mirR 20 450
-----ATTCATTTACTCCCCAGCCT----- mirR 20 363
-----TTCATTTACTCCCCAGCCTACACA----- mirR 22 349
-----ATTCATTTACTCCCCAGCCTACAC----- mirR 24 188
-----TTCATTTACTCCCCAGCCTAC----- mirR 21 163
-----TTCATTTACTCCCCAGCCTACAC----- mirR 23 89
-----TCATTTACTCCCCAGCCTACACA----- mirR 21 71
-----ATTCATTTACTCCCCAGCC----- mirR 19 70
-----ATTCATTTACTCCCCAGCCTACACA----- mirR 25 64
-----TCATTTACTCCCCAGCCTAC----- mirR 20 55
-----TCATTTACTCCCCAGCCTACAC----- mirR 22 55
-----TCATTTACTCCCCAGCCTA----- mirR 19 51
-----TTCATTTACTCCCCAGCCTA----- mirR 20 47
-----TTCATTTACTCCCCAGCCT----- mirR 19 21
-----TTCATTTACTCCCCAGCCTACACA----- mirR 24 16
-----TCATTTACTCCCCAGCCT----- mirR 18 13
-----TCATTTACTCCCCAGCCTACACA----- mirR 23 13
-----CTATTCATTTACTCCCCAGCCTAC----- mirR 24 11
-----TTCATTTACTCCCCAGCC----- mirR 18 6
-----TCTATTCATTTACTCCCCA----- mirR 19 4
-----CTATTCATTTACTCCCCAGCCTA----- mirR 23 3
-----TCATTTACTCCCCAGCCTACACAT----- mirR 24 2
-----CTATTCATTTACTCCCCAGCCTACAC----- mirR 26 2
-----CTATTCATTTACTCCCCA----- mirR 18 2
-----TTCTATTCATTTACTCCC----- mirR 18 1
-----CTATTCATTTACTCCCCAGCCT----- mirR 22 1
```

```

-----TCTATTCACTTTACTCCCCAGCCTA----- mirR 24 1
-----TGAAAGCAATAACAGCAC-- morR 18 2
-----ACATGAAAGCAATAACAG----- morR 18 1
-----TGAAAGCAATAACAGCACAA morR 20 1
-----ACACATGAAAGCAATAAC----- morR 18 1
-----TGAAAGCAATAACAGCACA- morR 19 1

>mmu-mir-500
TCTCCTCTGCTCCCCCTCTCTAATCCTTGCTATCTGGGTGCTTAGTGCTATCTCAATGCAATGCACCTGGGCAAGGGTTCAGAGAAGGTGAGCTCATCTGCATCA species len reads
--TCCTCTGCTCCCCCTCTCT----- morL 19 3
TCTCCTCTGCTCCCCCTCTCT----- morL 21 2
--TCCTCTGCTCCCCCTCTCT----- morL 18 2
TCTCCTCTGCTCCCCCTCTC----- morL 20 2
-----TGCTCCCCCTCTCTAATC----- morL 18 1
-----TCTGCTCCCCCTCTCTAA----- morL 18 1
-----CCTCTGCTCCCCCTCTCTA----- morL 19 1
-----ATCCTTGCTATCTGGGTGCTT----- mirL 21 1682
-----ATCCTTGCTATCTGGGTGCTTA----- mirL 22 169
-----AATCCTTGCTATCTGGGTGCTTAG----- mirL 24 125
-----AATCCTTGCTATCTGGGTGCTTA----- mirL 23 115
-----ATCCTTGCTATCTGGGTGCT----- mirL 20 115
-----AATCCTTGCTATCTGGGTGCTT----- mirL 22 107
-----AATCCTTGCTATCTGGGTGCTTAGT----- mirL 25 58
-----AATCCTTGCTATCTGGGTGCT----- mirL 20 54
-----ATCCTTGCTATCTGGGTGCT----- mirL 19 53
-----TAATCCTTGCTATCTGGGTGCT----- mirL 21 43
-----ATCCTTGCTATCTGGGTGCT----- mirL 18 35
-----ATCCTTGCTATCTGGGTGCTTAG----- mirL 23 27
-----AATCCTTGCTATCTGGGTGCT----- mirL 19 20
-----TAATCCTTGCTATCTGGGTGCT----- mirL 22 19
-----AATCCTTGCTATCTGGGTGCT----- mirL 21 19
-----TAATCCTTGCTATCTGGGTGCTT----- mirL 23 10
-----TAATCCTTGCTATCTGGGTGCTTAG----- mirL 25 6
-----TCCTTGCTATCTGGGTGCTT----- mirL 20 4
-----TAATCCTTGCTATCTGGGTGCT----- mirL 18 4
-----TAATCCTTGCTATCTGGGTGCT----- mirL 20 3
-----TAATCCTTGCTATCTGGGTGCTTA----- mirL 24 3
-----CTTGCTATCTGGGTGCTT----- mirL 18 2
-----TCCTTGCTATCTGGGTGCT----- mirL 18 2
-----CCTTGCTATCTGGGTGCT----- mirL 18 2
-----CCTTGCTATCTGGGTGCTT----- mirL 19 2
-----TCCTTGCTATCTGGGTGCTTA----- mirL 21 2
-----CTTGCTATCTGGGTGCTTA----- mirL 19 1
-----TCCTTGCTATCTGGGTGCTTAGT----- mirL 23 1
-----TCCTTGCTATCTGGGTGCT----- mirL 19 1
-----CCTTGCTATCTGGGTGCTTA----- mirL 20 1

```

```

-----ATCCTTGCTATCTGGGTGCTTAGT----- mirL 24 1
-----AATGCACCTGGGCAAGGGTTC----- mirR 22 11344
-----AATGCACCTGGGCAAGGGTTC----- mirR 21 11002
-----AATGCACCTGGGCAAGGGTT----- mirR 20 2541
-----AATGCACCTGGGCAAGGGTTCAG----- mirR 23 2100
-----ATGCACCTGGGCAAGGGTTCAG----- mirR 22 1307
-----AATGCACCTGGGCAAGGGTTCAGA----- mirR 24 358
-----AATGCACCTGGGCAAGGGT----- mirR 19 357
-----AATGCACCTGGGCAAGGGTTCAGAG----- mirR 25 240
-----ATGCACCTGGGCAAGGGTTC----- mirR 21 172
-----ATGCACCTGGGCAAGGGTTC----- mirR 20 90
-----TGCACCTGGGCAAGGGTTC----- mirR 20 40
-----GCACCTGGGCAAGGGTTC----- mirR 19 32
-----TGCACCTGGGCAAGGGTTCAG----- mirR 21 32
-----GCACCTGGGCAAGGGTTCAG----- mirR 20 28
-----ATGCACCTGGGCAAGGGTTCAGA----- mirR 23 24
-----GCACCTGGGCAAGGGTTC----- mirR 18 20
-----ATGCACCTGGGCAAGGGTT----- mirR 19 18
-----TGCACCTGGGCAAGGGTTC----- mirR 19 16
-----ATGCACCTGGGCAAGGGT----- mirR 18 13
-----ATGCACCTGGGCAAGGGTTCAGAG----- mirR 24 10
-----CAATGCACCTGGGCAAGGGTTC----- mirR 22 8
-----TGCACCTGGGCAAGGGTT----- mirR 18 6
-----TGCACCTGGGCAAGGGTTCAGA----- mirR 22 2
-----GCACCTGGGCAAGGGTTCAGA----- mirR 21 1
-----CAATGCACCTGGGCAAGGGTT----- mirR 21 1
-----CAATGCACCTGGGCAAGGGTTCAG----- mirR 24 1
-----AGAAGGTGAGCTCATCTGCATC----- morR 22 3
-----AGAAGGTGAGCTCATCTGCAT----- morR 21 1
-----AGAAGGTGAGCTCATCTG----- morR 18 1
-----AGAAGGTGAGCTCATCTGCATCA morR 23 1

>mmu-mir-425
CAGCATGGAAAGTGCTTTGGAATGACACGATCACTCCCGTTGAGTGGGCACCCAAGAAGCCATCGGGAATGTCGTGTCGCCACCTCCCA species len reads
-AGCATGGAAAGTGCTTTGG----- morL 19 1
CAGCATGGAAAGTGCTTTGG----- morL 20 1
-----TGGAAAGTGCTTTGGAAT----- morL 18 1
-----AATGACACGATCACTCCCGTTGA----- mirL 23 9964
-----AATGACACGATCACTCCCGTTG----- mirL 22 5173
-----AATGACACGATCACTCCCGTT----- mirL 21 1384
-----AATGACACGATCACTCCC----- mirL 18 1320
-----AATGACACGATCACTCCCGTTGAG----- mirL 24 1049
-----AATGACACGATCACTCCCGT----- mirL 20 531
-----AATGACACGATCACTCCCG----- mirL 19 464
-----ATGACACGATCACTCCCGTTGA----- mirL 22 120
-----GACACGATCACTCCCGTTGA----- mirL 20 41

```

```

-----ATGACACGATCACTCCCGTTG----- mirL 21 34
-----GACACGATCACTCCCGTTG----- mirL 19 18
-----TGACACGATCACTCCCGTTGA----- mirL 21 15
-----ATGACACGATCACTCCCGTTGAG----- mirL 23 13
-----ATGACACGATCACTCCCG----- mirL 18 10
-----GACACGATCACTCCCGTT----- mirL 18 10
-----ATGACACGATCACTCCCGTT----- mirL 20 9
-----TGACACGATCACTCCCGTTG----- mirL 20 8
-----ATGACACGATCACTCCCGTTGAGTG----- mirL 25 7
-----GACACGATCACTCCCGTTGAG----- mirL 21 7
-----GAATGACACGATCACTCCCGTTG----- mirL 23 6
-----ATGACACGATCACTCCCGT----- mirL 19 5
-----TGACACGATCACTCCCGTT----- mirL 19 4
-----TGACACGATCACTCCCGTTGAGT----- mirL 23 4
-----TGACACGATCACTCCCGTTGAG----- mirL 22 3
-----GAATGACACGATCACTCCCGTTGAG----- mirL 25 2
-----TGACACGATCACTCCCGTTGAGTG----- mirL 24 2
-----GAATGACACGATCACTCCCGTT----- mirL 22 2
-----TGACACGATCACTCCCGTTGAGTGG----- mirL 25 2
-----GAATGACACGATCACTCCCGTTGA----- mirL 24 1
-----GAATGACACGATCACTCCCGT----- mirL 21 1
-----GGAATGACACGATCACTCCCG----- mirL 21 1
-----GACACGATCACTCCCGTTGAGT----- mirL 22 1
-----GAATGACACGATCACTCCC----- mirL 19 1
-----GAATGACACGATCACTCC----- mirL 18 1
-----GGAATGACACGATCACTCCCGTTG----- mirL 24 1
-----GGCACCCAAGAAGCCATC----- loop 18 1
-----ATCGGGAATGTCGTGTCCGCC----- mirR 22 2923
-----ATCGGGAATGTCGTGTCCGCC----- mirR 21 2901
-----ATCGGGAATGTCGTGTCCGC----- mirR 20 2077
-----ATCGGGAATGTCGTGTCCGCCA----- mirR 23 761
-----ATCGGGAATGTCGTGTCCGCCAG----- mirR 24 660
-----ATCGGGAATGTCGTGTCC----- mirR 18 551
-----ATCGGGAATGTCGTGTCCG----- mirR 19 536
-----CATCGGGAATGTCGTGTCCGC----- mirR 21 197
-----TCGGGAATGTCGTGTCCGCC----- mirR 21 187
-----CATCGGGAATGTCGTGTCCGCC----- mirR 23 161
-----CATCGGGAATGTCGTGTCCGCC----- mirR 22 158
-----TCGGGAATGTCGTGTCCGCC----- mirR 20 94
-----CATCGGGAATGTCGTGTCC----- mirR 18 76
-----TCGGGAATGTCGTGTCCGCCA----- mirR 22 69
-----TCGGGAATGTCGTGTCCGCCAG----- mirR 23 69
-----CATCGGGAATGTCGTGTCCG----- mirR 20 61
-----GGGAATGTCGTGTCCGCC----- mirR 19 61
-----CATCGGGAATGTCGTGTCCGCCA----- mirR 24 60
-----CCATCGGGAATGTCGTGTCCGC----- mirR 22 59

```

```

-----CATCGGGAATGTCGTGTCC----- mirR 19 58
-----TCGGGAATGTCGTGTCCGC----- mirR 19 57
-----GGGAATGTCGTGTCCGCC----- mirR 18 55
-----CGGGAATGTCGTGTCCGCC----- mirR 19 43
-----TCGGGAATGTCGTGTCCGCCAGT----- mirR 24 39
-----CGGGAATGTCGTGTCCGCC----- mirR 20 34
-----CGGGAATGTCGTGTCCGC----- mirR 18 22
-----CCATCGGGAATGTCGTGTCCGCC----- mirR 23 15
-----GGGAATGTCGTGTCCGCCA----- mirR 20 15
-----TCGGGAATGTCGTGTCCG----- mirR 18 15
-----CCATCGGGAATGTCGTGTCCG----- mirR 21 11
-----CCATCGGGAATGTCGTGTCC----- mirR 19 10
-----CGGGAATGTCGTGTCCGCCA----- mirR 21 9
-----CCATCGGGAATGTCGTGTCC----- mirR 20 5
-----CGGGAATGTCGTGTCCGCCAGT----- mirR 23 4
-----CCATCGGGAATGTCGTGTCCGCC----- mirR 24 3
-----GGGAATGTCGTGTCCGCCAG----- mirR 21 2
-----CCATCGGGAATGTCGTGT----- mirR 18 1
-----TGCTCTTTCGGCACCTCCCA morR 20 4
-----TGCTCTTTCGGCACCTCC-- morR 18 1

```

```

>mmu-mir-1-2
GAGCACATACTTCTTTATGTACCCATATGAACATTCAGTGCTATGGAATGTAAAGAAGTATGTATTTTG species len reads
--GCACATACTTCTTTATGTACCC----- mirL 22 5359
--GCACATACTTCTTTATGTACCCA----- mirL 23 1210
--GCACATACTTCTTTATGTACC----- mirL 21 1188
--GCACATACTTCTTTATGTACCCAT----- mirL 24 287
--GCACATACTTCTTTATGTAC----- mirL 20 197
----CATACTTCTTTATGTACCC----- mirL 19 55
---CACATACTTCTTTATGTACCC----- mirL 21 41
---ACATACTTCTTTATGTACCCAT----- mirL 22 25
----CATACTTCTTTATGTACC----- mirL 18 22
--GCACATACTTCTTTATGTAC----- mirL 19 22
--GCACATACTTCTTTATGTACCCATA----- mirL 25 21
---ACATACTTCTTTATGTACCC----- mirL 20 17
---ACATACTTCTTTATGTACCCA----- mirL 21 11
---ACATACTTCTTTATGTACCCATA----- mirL 23 11
---CACATACTTCTTTATGTACC----- mirL 20 7
---CACATACTTCTTTATGTACCCA----- mirL 22 6
--AGCACATACTTCTTTATGTACCC----- mirL 23 3
----CATACTTCTTTATGTACCCAT----- mirL 21 3
----CATACTTCTTTATGTACCCA----- mirL 20 3
----ACATACTTCTTTATGTAC----- mirL 18 2
--AGCACATACTTCTTTATGTACCCATA----- mirL 26 2
----CATACTTCTTTATGTACCCATA----- mirL 22 2
---CACATACTTCTTTATGTACCCAT----- mirL 23 1

```



```

GAGCACATACTTCTTTATGTACCC----- mirL 24 1
-----CCATATGAACATTCAGTG----- loop 18 1
-----TGAACATTCAGTGCTATG----- loop 18 1
-----TGGAATGTAAGAAGTATGTAT---- mirR 22 9779
-----TGGAATGTAAGAAGTATGT---- mirR 20 5274
-----TGGAATGTAAGAAGTATG----- mirR 19 2714
-----TGGAATGTAAGAAGTATGTA---- mirR 21 1731
-----TGGAATGTAAGAAGTAT----- mirR 18 1671
-----TGGAATGTAAGAAGTATGTATT-- mirR 23 700
-----GGAATGTAAGAAGTATGTAT---- mirR 21 484
-----GGAATGTAAGAAGTATGT---- mirR 19 362
-----GGAATGTAAGAAGTATG----- mirR 18 309
-----TGGAATGTAAGAAGTATGTATTT-- mirR 24 184
-----GAATGTAAGAAGTATGT----- mirR 18 110
-----GGAATGTAAGAAGTATGTA---- mirR 20 102
-----GGAATGTAAGAAGTATGTATT-- mirR 22 39
-----GAATGTAAGAAGTATGTAT---- mirR 20 30
-----GAATGTAAGAAGTATGTA---- mirR 19 17
-----AATGTAAGAAGTATGTAT---- mirR 19 17
-----AATGTAAGAAGTATGTA---- mirR 18 12
-----GGAATGTAAGAAGTATGTATTT-- mirR 23 5
-----ATGGAATGTAAGAAGTATGT---- mirR 21 5
-----ATGGAATGTAAGAAGTATGTAT---- mirR 23 4
-----ATGGAATGTAAGAAGTATG----- mirR 20 3
-----GAATGTAAGAAGTATGTATT-- mirR 21 2
-----ATGGAATGTAAGAAGTA----- mirR 18 2
-----GGAATGTAAGAAGTATGTATTTTG mirR 25 2
-----ATGGAATGTAAGAAGTAT----- mirR 19 2
-----TATGGAATGTAAGAAGTA----- mirR 19 1
-----TATGGAATGTAAGAAGT----- mirR 18 1

```

>mmu-mir-300

```

CCCAGCGCTCCTTATCGTTTGCTACTTGAAGAGAGGTTATCCTTTGTGTGTTTGCTTTACGCGAAATGAATATGCAAGGGCAAGCTCTCTTCGAGGA species len reads
-----TTATCGTTTGCTACTTGA----- morL 18 7
-----CGCTCCTTATCGTTTGCTACT----- morL 21 2
-----CTCCTTATCGTTTGCTACT----- morL 19 2
-----CTCCTTATCGTTTGCTACTTGA----- morL 22 2
-----CTTATCGTTTGCTACTTGA----- morL 19 2
-----TCCTTATCGTTTGCTACT----- morL 18 2
-----CTCCTTATCGTTTGCTACTT----- morL 20 1
-----GCGCTCCTTATCGTTTGCTAC----- morL 21 1
CCCAGCGCTCCTTATCGTTTGCTAC----- morL 25 1
-----TGAAGAGAGGTTATCCTTTGTGT----- mirL 23 483
-----TTGAAGAGAGGTTATCCTTTGTGT----- mirL 24 250
-----TTGAAGAGAGGTTATCCTTTGT----- mirL 22 238
-----TGAAGAGAGGTTATCCTTTGTGT----- mirL 25 192

```

```

-----TGAAGAGAGGTTATCCTTTGTGTG----- mirL 24 151
-----AAGAGAGGTTATCCTTTGTGTG----- mirL 23 144
-----TTGAAGAGAGGTTATCCTTTGTG----- mirL 23 141
-----TGAAGAGAGGTTATCCTTTGT----- mirL 21 102
-----TTGAAGAGAGGTTATCCTTTG----- mirL 21 86
-----TGAAGAGAGGTTATCCTTTGTG----- mirL 22 62
-----GAAGAGAGGTTATCCTTTGTGTG----- mirL 24 37
-----TGAAGAGAGGTTATCCTTTG----- mirL 20 37
-----TTGAAGAGAGGTTATCCTTTGTGTG----- mirL 25 24
-----GAAGAGAGGTTATCCTTTGTGT----- mirL 22 22
-----TTGAAGAGAGGTTATCCTTT----- mirL 20 20
-----AGAGAGGTTATCCTTTGTGTG----- mirL 22 20
-----GAAGAGAGGTTATCCTTTGTGTG----- mirL 23 18
-----TTGAAGAGAGGTTATCCTT----- mirL 19 17
-----AAGAGAGGTTATCCTTTGTGTG----- mirL 22 13
-----AAGAGAGGTTATCCTTTGTGT----- mirL 21 10
-----GAAGAGAGGTTATCCTTTGT----- mirL 20 8
-----AGAGAGGTTATCCTTTGTGTGTT----- mirL 23 8
-----AAGAGAGGTTATCCTTTGT----- mirL 19 5
-----AAGAGAGGTTATCCTTTG----- mirL 18 5
-----TGAAGAGAGGTTATCCTTT----- mirL 19 5
-----AGAGAGGTTATCCTTTGTGTGTT----- mirL 24 5
-----AGAGAGGTTATCCTTTGT----- mirL 18 5
-----GAAGAGAGGTTATCCTTTGTG----- mirL 21 3
-----GAAGAGAGGTTATCCTTTG----- mirL 19 2
-----ACTTGAAGAGAGGTTATC----- mirL 18 2
-----AGAGAGGTTATCCTTTGTG----- mirL 19 1
-----AAGAGAGGTTATCCTTTGTGTGTT----- mirL 24 1
-----AGAGAGGTTATCCTTTGTGTG----- mirL 21 1
-----AAGAGAGGTTATCCTTTGTG----- mirL 20 1
-----AGAGAGGTTATCCTTTGTGT----- mirL 20 1
-----TGTTTGCTTTACGCGAAATGA----- loop 21 3
-----TGTTTGCTTTACGCGAAATGA----- loop 23 1
-----TGTTTGCTTTACGCGAAATGAA----- loop 22 1
-----TATGCAAGGGCAAGCTCTCTTC----- mirR 22 16159
-----TATGCAAGGGCAAGCTCTCTT----- mirR 21 2050
-----TGCAAGGGCAAGCTCTCTTCGA----- mirR 22 1962
-----TATGCAAGGGCAAGCTCTCTTCG----- mirR 23 1687
-----ATGCAAGGGCAAGCTCTCTTC----- mirR 21 1292
-----TATGCAAGGGCAAGCTCTC----- mirR 19 1122
-----ATGCAAGGGCAAGCTCTCTTCGA----- mirR 23 1119
-----TATGCAAGGGCAAGCTCTCTTCGA----- mirR 24 802
-----TATGCAAGGGCAAGCTCTCT----- mirR 20 793
-----ATGCAAGGGCAAGCTCTCTTCG----- mirR 22 423
-----TGCAAGGGCAAGCTCTCTTCG----- mirR 21 235
-----TGCAAGGGCAAGCTCTCTTC----- mirR 20 227

```

```

-----ATGCAAGGGCAAGCTCTCTT----- mirR 20 218
-----TATGCAAGGGCAAGCTCT----- mirR 18 214
-----ATGCAAGGGCAAGCTCTC----- mirR 18 147
-----TGCAAGGGCAAGCTCTCTTCGAG-- mirR 23 137
-----TGCAAGGGCAAGCTCTCTT----- mirR 19 109
-----ATGCAAGGGCAAGCTCTCTTCGAG-- mirR 24 102
-----ATGCAAGGGCAAGCTCTCT----- mirR 19 72
-----ATATGCAAGGGCAAGCTCTCTTC---- mirR 23 60
-----GCAAGGGCAAGCTCTCTTC---- mirR 19 58
-----GCAAGGGCAAGCTCTCTTCGA--- mirR 21 44
-----TGCAAGGGCAAGCTCTCTTCGAGGA mirR 25 40
-----TGCAAGGGCAAGCTCTCT----- mirR 18 29
-----ATATGCAAGGGCAAGCTCTCTT---- mirR 22 25
-----ATATGCAAGGGCAAGCTCTCT----- mirR 21 23
-----GCAAGGGCAAGCTCTCTTCG--- mirR 20 14
-----ATATGCAAGGGCAAGCTCTC----- mirR 20 13
-----GCAAGGGCAAGCTCTCTT----- mirR 18 8
-----GCAAGGGCAAGCTCTCTTCGAG-- mirR 22 6
-----ATATGCAAGGGCAAGCTCT----- mirR 19 4
-----GCAAGGGCAAGCTCTCTTCGAG- mirR 23 3
-----AATATGCAAGGGCAAGCTCTC----- mirR 21 2
-----ATATGCAAGGGCAAGCTC----- mirR 18 1

```

>mmu-mir-574

```

GTGTGAGTGTGTGTGTGAGTGTGTGTGCTCGCTCCAAGTCCACGCTCATGCACACACCCACACGCCCGCACGCCGGTCTGCACC species len reads
---TGAGTGTGTGTGTGAGTGTGT----- mirL 23 2910
---TGAGTGTGTGTGTGAGTGT----- mirL 21 1366
---TGAGTGTGTGTGTGAGTGT----- mirL 22 816
---TGAGTGTGTGTGTGAGTGTG----- mirL 24 472
---GAGTGTGTGTGTGAGTGTGT----- mirL 22 300
---TGAGTGTGTGTGTGAGTG----- mirL 20 234
---TGAGTGTGTGTGTGAGTGTGT----- mirL 25 227
---TGAGTGTGTGTGTGAGT----- mirL 19 175
---GAGTGTGTGTGTGAGTGT----- mirL 20 64
---GAGTGTGTGTGTGAGTGT----- mirL 21 55
---AGTGTGTGTGTGAGTGTGT----- mirL 21 36
---GAGTGTGTGTGTGAGTGTGTG----- mirL 23 27
---GTGTGTGTGTGTGAGTGTGT----- mirL 20 19
---GAGTGTGTGTGTGAGTG----- mirL 19 16
---GAGTGTGTGTGTGAGT----- mirL 18 12
---AGTGTGTGTGTGAGTG----- mirL 18 11
---AGTGTGTGTGTGAGTGT----- mirL 20 10
---GAGTGTGTGTGTGAGTGTGT----- mirL 24 7
---AGTGTGTGTGTGAGTGT----- mirL 19 5
---GTGTGTGTGTGTGAGTGTGT----- mirL 21 3
---GTGAGTGTGTGTGTGAGTGTGT----- mirL 24 3

```

```

-----GTGTGTGTGTGTGAGTGTG----- mirL 19 2
--GTGAGTGTGTGTGTGAGT----- mirL 20 2
GTGTGAGTGTGTGTGTGT----- mirL 18 1
GTGTGAGTGTGTGTGTGAGTGTGT----- mirL 26 1
-----AGTGTGTGTGTGTGAGTGTGT----- mirL 22 1
-TGTGAGTGTGTGTGTGTG----- mirL 18 1
-----GTGTCGCTCCAAGTCCAC----- loop 18 2
-----TGTGTCGCTCCAAGTCCA----- loop 18 2
-----CACGCTCATGCACACACCCACA----- mirR 22 7644
-----CACGCTCATGCACACACCCAC----- mirR 21 6398
-----CACGCTCATGCACACACCCACAC----- mirR 23 5059
-----CACGCTCATGCACACACCCCA----- mirR 20 2018
-----CACGCTCATGCACACACCC----- mirR 19 540
-----CACGCTCATGCACACACACC----- mirR 18 453
-----CACGCTCATGCACACACCCACACG----- mirR 24 193
-----CGCTCATGCACACACCCACA----- mirR 20 128
-----ACGCTCATGCACACACCCACA----- mirR 21 115
-----GCTCATGCACACACCCACA----- mirR 19 67
-----ACGCTCATGCACACACCCAC----- mirR 20 57
-----CGCTCATGCACACACCCAC----- mirR 19 52
-----ACGCTCATGCACACACCCACAC----- mirR 22 38
-----GCTCATGCACACACCCAC----- mirR 18 33
-----CGCTCATGCACACACCCCA----- mirR 18 33
-----ACGCTCATGCACACACCCCA----- mirR 19 31
-----GCTCATGCACACACCCACAC----- mirR 20 13
-----CGCTCATGCACACACCCACAC----- mirR 21 12
-----CCACGCTCATGCACACACCCAC----- mirR 22 11
-----CCACGCTCATGCACACACCCACA----- mirR 23 11
-----ACGCTCATGCACACACCC----- mirR 18 10
-----TCCACGCTCATGCACACACCCA----- mirR 22 7
-----TCCACGCTCATGCACACACCCAC----- mirR 23 7
-----CGCTCATGCACACACCCACACG----- mirR 22 4
-----CCACGCTCATGCACACACCCCA----- mirR 21 3
-----GCTCATGCACACACCCACACG----- mirR 21 2
-----TCCACGCTCATGCACACACCC----- mirR 21 2
-----TCCACGCTCATGCACACACCCACA----- mirR 24 2
-----ACGCTCATGCACACACCCACACG----- mirR 23 2
-----CCACGCTCATGCACACACCCACAC----- mirR 24 1
-----TCCACGCTCATGCACACAC----- mirR 19 1
-----CCACGCTCATGCACACACCCACACG----- mirR 26 1
-----CCACGCTCATGCACACACACC----- mirR 19 1
-----ACGCTCATGCACACACCCACACGCC----- mirR 25 1
-----TCCACGCTCATGCACACA----- mirR 18 1
-----ACACGCCCGCACGCCCGG----- morR 18 1
-----CGCCGCACGCCCGGTCTGCACC----- morR 23 1
-----CCGCACGCCCGGTCTGCA----- morR 18 1

```

```

>mmu-mir-322
CTGCAGCAGCAATTCATGTTTTGGAGTATTGCCAAGGTTCAAAACATGAAGCGCTGCAACACCCCTTCGTGGGGAATGTAGA species len reads
---CAGCAGCAATTCATGTTTTGGA----- mirL 22 2544
---CAGCAGCAATTCATGTTTTGG----- mirL 21 1760
---CAGCAGCAATTCATGTTTTG----- mirL 20 1182
---CAGCAGCAATTCATGTTTTGGAG----- mirL 23 927
---CAGCAGCAATTCATGTTTTGGAGT----- mirL 24 266
---CAGCAGCAATTCATGTTTT----- mirL 19 255
---CAGCAGCAATTCATGTTTT----- mirL 18 234
--GCAGCAGCAATTCATGTTTTG----- mirL 21 190
--GCAGCAGCAATTCATGTTTTGG----- mirL 22 66
--GCAGCAGCAATTCATGTTTTGGA----- mirL 23 34
--GCAGCAGCAATTCATGTTTT----- mirL 20 24
--GCAGCAGCAATTCATGTTTT----- mirL 19 15
--GCAGCAGCAATTCATGTT----- mirL 18 14
---AGCAGCAATTCATGTTTTG----- mirL 19 12
---GCAGCAATTCATGTTTTG----- mirL 18 10
--GCAGCAGCAATTCATGTTTTGGAG----- mirL 24 10
---AGCAGCAATTCATGTTTTGGA----- mirL 21 9
---AGCAGCAATTCATGTTTTGG----- mirL 20 9
---CAGCAATTCATGTTTTGG----- mirL 18 6
---AGCAGCAATTCATGTTTT----- mirL 18 4
---AGCAGCAATTCATGTTTTGGAG----- mirL 22 2
---GCAGCAATTCATGTTTTGG----- mirL 19 2
--TGCAGCAGCAATTCATGTTTTGG----- mirL 23 1
----CAGCAATTCATGTTTTGGAG----- mirL 20 1
---AGCAGCAATTCATGTTTTGGAGT----- mirL 23 1
CTGCAGCAGCAATTCATG----- mirL 18 1
----GCAGCAATTCATGTTTTGGAG----- mirL 21 1
----CAGCAATTCATGTTTTGGA----- mirL 19 1
-----AAACATGAAGCGCTGCAACA----- mirR 20 12714
-----AAACATGAAGCGCTGCAACAC----- mirR 21 4466
-----AAACATGAAGCGCTGCAAC----- mirR 19 1546
-----AAACATGAAGCGCTGCAACACC----- mirR 22 644
-----AAACATGAAGCGCTGCAA----- mirR 18 411
-----AACATGAAGCGCTGCAACA----- mirR 19 368
-----AAAACATGAAGCGCTGCAACA----- mirR 21 294
-----CAAAACATGAAGCGCTGCAACAC----- mirR 23 254
-----CAAAACATGAAGCGCTGCAACA----- mirR 22 242
-----ACATGAAGCGCTGCAACA----- mirR 18 221
-----CAAAACATGAAGCGCTGCAAC----- mirR 21 205
-----AAAACATGAAGCGCTGCAACAC----- mirR 22 144
-----CAAAACATGAAGCGCTGCAA----- mirR 20 120
-----AAAACATGAAGCGCTGCAAC----- mirR 20 85
-----AAACATGAAGCGCTGCAACACCC----- mirR 23 85

```

```

-----AACATGAAGCGCTGCAACAC----- mirR 20 70
-----ACATGAAGCGCTGCAACAC----- mirR 19 49
-----CATGAAGCGCTGCAACAC----- mirR 18 46
-----AAAACATGAAGCGCTGCAA----- mirR 19 27
-----AACATGAAGCGCTGCAAC----- mirR 18 25
-----AAAACATGAAGCGCTGCAACACC----- mirR 23 20
-----AAAACATGAAGCGCTGCAACACCCC----- mirR 24 17
-----CAAAACATGAAGCGCTGCA----- mirR 19 15
-----CAAAACATGAAGCGCTGCAACACC----- mirR 24 9
-----AACATGAAGCGCTGCAACACC----- mirR 21 7
-----CAAAACATGAAGCGCTGC----- mirR 18 6
-----CATGAAGCGCTGCAACACC----- mirR 19 5
-----ACATGAAGCGCTGCAACACC----- mirR 20 4
-----AAAACATGAAGCGCTGCA----- mirR 18 3
-----TCAAAACATGAAGCGCTGCAA----- mirR 21 2
-----AAAACATGAAGCGCTGCAACACCCC----- mirR 24 2
-----TCAAAACATGAAGCGCTGCAAC----- mirR 22 1
-----AACATGAAGCGCTGCAACACCCC----- mirR 22 1
-----CCCTTCGTGGGGAATGTAGA morR 20 1
-----CCCCTTCGTGGGGAATGT--- morR 18 1

```

>mmu-mir-211

| Species                                                                                                            | len | reads |
|--------------------------------------------------------------------------------------------------------------------|-----|-------|
| TGGACCTGTGACCTGTGGGCTTCCCTTTGTCATCCTTTGCTAGGCCTCTGAGTGAGGCAAGGACAGCAAAGGGGGGCTCAGTGGTCACCTCTACTGCAGAGAGTTCAGAAGCCT | 18  | 1     |
| TGGACCTGTGACCTGTGG                                                                                                 | 18  | 1     |
| ---CCTGTGACCTGTGGGCTT---                                                                                           | 18  | 1     |
| -----TTCCTTTGTCATCCTTTG-----                                                                                       | 19  | 6181  |
| -----TTCCCTTTGTCATCCTTT-----                                                                                       | 18  | 5206  |
| -----TTCCCTTTGTCATCCTTTGCT-----                                                                                    | 20  | 4804  |
| -----TTCCCTTTGTCATCCTTTGCCT-----                                                                                   | 22  | 4743  |
| -----TTCCCTTTGTCATCCTTTGCCTA-----                                                                                  | 23  | 4484  |
| -----TTCCCTTTGTCATCCTTTGCC-----                                                                                    | 21  | 2825  |
| -----TCCCTTTGTCATCCTTTGCCT-----                                                                                    | 21  | 235   |
| -----TCCCTTTGTCATCCTTTGCCTA-----                                                                                   | 22  | 198   |
| -----TCCCTTTGTCATCCTTTG-----                                                                                       | 18  | 184   |
| -----TCCCTTTGTCATCCTTTGCT-----                                                                                     | 19  | 165   |
| -----TTCCCTTTGTCATCCTTTGCCTAG-----                                                                                 | 24  | 114   |
| -----TCCCTTTGTCATCCTTTGCC-----                                                                                     | 20  | 90    |
| -----CCCTTTGTCATCCTTTGCCT-----                                                                                     | 20  | 22    |
| -----CCTTTGTCATCCTTTGCCT-----                                                                                      | 19  | 16    |
| -----TCCCTTTGTCATCCTTTGCCTAG-----                                                                                  | 23  | 9     |
| -----CCCTTTGTCATCCTTTGCCTA-----                                                                                    | 21  | 5     |
| -----CTTCCCTTTGTCATCCTTT-----                                                                                      | 19  | 5     |
| -----CCTTTGTCATCCTTTGCCTA-----                                                                                     | 20  | 3     |
| -----CCTTTGTCATCCTTTGCC-----                                                                                       | 18  | 2     |
| -----CTTCCCTTTGTCATCCTTTGCC-----                                                                                   | 22  | 2     |
| -----CTTCCCTTTGTCATCCTTTGCCT-----                                                                                  | 23  | 2     |

```

-----TCCCTTTGTCATCCTTTGCCTAGG----- mirL 24 2
-----CTTCCCTTTGTCATCCTTTGC----- mirL 21 2
-----CTTCCCTTTGTCATCCTT----- mirL 18 1
-----GCTTCCCTTTGTCATCCT----- mirL 18 1
-----CCCTTTGTCATCCTTTGC----- mirL 18 1
-----CCCTTTGTCATCCTTTGCCTAG----- mirL 22 1
-----CCTTTGTCATCCTTTGCCTAG----- mirL 21 1
-----CTTCCCTTTGTCATCCTTTG----- mirL 20 1
-----GCTTCCCTTTGTCATCCTT----- mirL 19 1
-----CCCTTTGTCATCCTTTGCC----- mirL 19 1
-----CCTTTGTCATCCTTTGCCTAGGC----- mirL 23 1
-----GGCTCAGTGGTCACCTCTAC----- mirR 20 8
-----GGGGGCTCAGTGGTCACC----- mirR 18 1
-----TACTGCAGAGAGTTCAGA----- morR 18 3
-----CAGAGAGTTCAGAAGCCT morR 18 2
-----CTGCAGAGAGTTCAGAAGC-- morR 19 1
-----GCAGAGAGTTCAGAAGCCT morR 19 1

```

>mmu-mir-223

| Species                                                                                                 | len | reads |
|---------------------------------------------------------------------------------------------------------|-----|-------|
| ATCTGCAGTGTACGCTCCGTGATTTGACAAGCTGAGTTGGACACTCTGTGTGGTAGAGTGTAGTTCAGTTTGTCAAATACCCCAAGTGTGGCTCATGCCTATC | 19  | 1     |
| -TCTGCAGTGTACGCTCCG-----                                                                                | 18  | 1     |
| ATCTGCAGTGTACGCTC-----                                                                                  | 22  | 4055  |
| -----CGTGTATTTGACAAGCTGAGTT-----                                                                        | 23  | 765   |
| -----CGTGTATTTGACAAGCTGAGTTG-----                                                                       | 21  | 744   |
| -----CGTGTATTTGACAAGCTGAGT-----                                                                         | 20  | 519   |
| -----CGTGTATTTGACAAGCTGAG-----                                                                          | 19  | 376   |
| -----CGTGTATTTGACAAGCTG-----                                                                            | 18  | 233   |
| -----CGTGTATTTGACAAGCTGAGTTGG-----                                                                      | 24  | 18    |
| -----GTGTATTTGACAAGCTGAGTT-----                                                                         | 21  | 12    |
| -----GTGTATTTGACAAGCTGAG-----                                                                           | 19  | 11    |
| -----CCGTGTATTTGACAAGCTGAGTT-----                                                                       | 23  | 10    |
| -----GTGTATTTGACAAGCTGAG-----                                                                           | 18  | 9     |
| -----TGTATTTGACAAGCTGAGTT-----                                                                          | 20  | 8     |
| -----GTGTATTTGACAAGCTGAGT-----                                                                          | 20  | 4     |
| -----GTATTTGACAAGCTGAGTT-----                                                                           | 19  | 4     |
| -----GTGTATTTGACAAGCTGAGTTG-----                                                                        | 22  | 3     |
| -----GTATTTGACAAGCTGAGT-----                                                                            | 18  | 2     |
| -----GTATTTGACAAGCTGAGTTG-----                                                                          | 20  | 2     |
| -----TGTATTTGACAAGCTGAGTTG-----                                                                         | 21  | 1     |
| -----CCGTGTATTTGACAAGCTGAGTTG-----                                                                      | 24  | 1     |
| -----TGTATTTGACAAGCTGAG-----                                                                            | 18  | 1     |
| -----TGTATTTGACAAGCTGAGT-----                                                                           | 19  | 1     |
| -----GACACTCTGTGTGGTAGA-----                                                                            | 18  | 2     |
| -----GGACACTCTGTGTGGTAG-----                                                                            | 18  | 1     |
| -----TGTCAGTTTGTCAAATACCCCA-----                                                                        | 22  | 6490  |

```

-----TGTCAGTTTGTCAAATACCCC----- mirR 21 5168
-----TGTCAGTTTGTCAAATACCCCAA----- mirR 23 4609
-----TGTCAGTTTGTCAAATACCC----- mirR 20 1497
-----GTCAGTTTGTCAAATACCCCAA----- mirR 22 1199
-----GTCAGTTTGTCAAATACCCCA----- mirR 21 738
-----GTCAGTTTGTCAAATACCCC----- mirR 20 447
-----TGTCAGTTTGTCAAATACC----- mirR 19 353
-----TGTCAGTTTGTCAAATACCCCAAG----- mirR 24 296
-----TGTCAGTTTGTCAAATAC----- mirR 18 154
-----GTCAGTTTGTCAAATACCCCAAG----- mirR 23 149
-----CAGTTTGTCAAATACCCCA----- mirR 19 120
-----GTCAGTTTGTCAAATACCC----- mirR 19 114
-----CAGTTTGTCAAATACCCCAA----- mirR 20 98
-----CAGTTTGTCAAATACCCC----- mirR 18 90
-----TCAGTTTGTCAAATACCCCA----- mirR 20 82
-----TCAGTTTGTCAAATACCCCAA----- mirR 21 79
-----TCAGTTTGTCAAATACCCC----- mirR 19 52
-----GTGTCAGTTTGTCAAATACCCC----- mirR 22 33
-----GTCAGTTTGTCAAATACC----- mirR 18 26
-----TCAGTTTGTCAAATACCC----- mirR 18 22
-----GTGTCAGTTTGTCAAATACCCCAA----- mirR 24 14
-----GTGTCAGTTTGTCAAATACCCCA----- mirR 23 11
-----GTGTCAGTTTGTCAAATACCC----- mirR 21 11
-----GTCAGTTTGTCAAATACCCCAAGT----- mirR 24 5
-----GTGTCAGTTTGTCAAATACC----- mirR 20 4
-----GTGTCAGTTTGTCAAATAC----- mirR 19 2
-----GTGTCAGTTTGTCAAATACCCCAAG----- mirR 25 1
-----CAGTTTGTCAAATACCCCAAGT----- mirR 22 1
-----AAGTGTGGCTCATGCCTA-- morR 18 1
-----AGTGTGGCTCATGCCTAT- morR 18 1
-----CCAAGTGTGGCTCATGCC--- morR 18 1
-----AAGTGTGGCTCATGCCTATC morR 20 1

```

>mmu-mir-15a

```

CAAACCAACCCTTGGAGTAAAGTAGCAGCACATAATGGTTTGGATGTTGAAAAGGTGCAGGCCATACTGTGCTGCCTCAAA species len reads
--AAACCAACCCTTGGAGTA----- morL 18 2
----CCAACCCTTGGAGTAAAGTAG----- morL 21 1
----ACCAACCCTTGGAGTAAAGT----- morL 20 1
CAAACCAACCCTTGGAGTA----- morL 20 1
CAAACCAACCCTTGGAGTAAA----- morL 22 1
-----AACCTTGGAGTAAAGTA----- morL 18 1
-----TAGCAGCACATAATGGTTTGT----- mirL 21 15421
-----TAGCAGCACATAATGGTTTGT----- mirL 20 3279
-----TAGCAGCACATAATGGTTTGTGG----- mirL 23 2625
-----TAGCAGCACATAATGGTTTGTG----- mirL 22 1944
-----TAGCAGCACATAATGGTTTGTGGA----- mirL 24 854

```



```

-----TAGCAGCACATAATGGTTT----- mirL 19 844
-----AGCAGCACATAATGGTTTGT----- mirL 20 639
-----TAGCAGCACATAATGGTT----- mirL 18 426
-----AGCAGCACATAATGGTTTG----- mirL 19 297
-----AGCAGCACATAATGGTTTGTGG----- mirL 22 147
-----AGCAGCACATAATGGTTT----- mirL 18 62
-----AGCAGCACATAATGGTTTGTG----- mirL 21 57
-----AGCAGCACATAATGGTTTGTGGA----- mirL 23 53
-----GCAGCACATAATGGTTTG----- mirL 18 29
-----CAGCACATAATGGTTTGT----- mirL 18 25
-----GCAGCACATAATGGTTTGT----- mirL 19 13
-----GTAGCAGCACATAATGGTTTGT----- mirL 22 13
-----AGCAGCACATAATGGTTTGTGGAT----- mirL 24 11
-----GTAGCAGCACATAATGGTTTG----- mirL 21 7
-----GTAGCAGCACATAATGGTTT----- mirL 20 3
-----GCAGCACATAATGGTTTGTGG----- mirL 21 3
-----AGTAGCAGCACATAATGGTTTGT----- mirL 23 3
-----CAGCACATAATGGTTTGTGGAT----- mirL 22 1
-----GTAGCAGCACATAATGGTTTGTGG----- mirL 24 1
-----GCAGCACATAATGGTTTGTGGA----- mirL 22 1
-----GCAGCACATAATGGTTTGTG----- mirL 20 1
-----GTAGCAGCACATAATGGTTTGTG----- mirL 23 1
-----GCAGCACATAATGGTTTGTGGATG----- mirL 24 1
-----GTAGCAGCACATAATGGT----- mirL 18 1
-----TGTGGATGTTGAAAAGGT----- loop 18 1
-----CAGGCCATACTGTGCTGCCTCA-- mirR 22 1015
-----CAGGCCATACTGTGCTGCCTC--- mirR 21 221
-----CAGGCCATACTGTGCTGCCT--- mirR 20 96
-----CAGGCCATACTGTGCTGCCTCAA- mirR 23 67
-----AGGCCATACTGTGCTGCCTCA-- mirR 21 33
-----CAGGCCATACTGTGCTGCC----- mirR 19 28
-----CAGGCCATACTGTGCTGCCTCAA mirR 24 20
-----CAGGCCATACTGTGCTGC----- mirR 18 14
-----GCCATACTGTGCTGCCTCA-- mirR 19 13
-----GGCCATACTGTGCTGCCTCA-- mirR 20 11
-----GCAGGCCATACTGTGCTGCCTCA-- mirR 23 10
-----AGGCCATACTGTGCTGCCTCAA- mirR 22 6
-----AGGCCATACTGTGCTGCCTC--- mirR 20 4
-----GCAGGCCATACTGTGCTGCCT--- mirR 21 3
-----GCAGGCCATACTGTGCTGCC----- mirR 20 3
-----GGCCATACTGTGCTGCCTC--- mirR 19 3
-----GGCCATACTGTGCTGCCTCAA- mirR 21 2
-----GCAGGCCATACTGTGCTGC----- mirR 19 2
-----GCAGGCCATACTGTGCTGCCTC--- mirR 22 2
-----GCAGGCCATACTGTGCTG----- mirR 18 1
-----TGCCAGGCCATACTGTGCTGCC----- mirR 21 1

```

```

-----GTGCAGGCCATACTGTGCT----- mirR 19 1

>mmu-mir-383
TCCACGTCACCTGCTCCTCAGATCAGAAGGTGACTGTGGCTTTGGGTGGATATTAATCAGCCACAGCACTGCCTGGTCAGAAAGAGCAAGTGTCTCTAG species len reads
TCCACGTCACCTGCTCCT----- morL 18 2
--CACGTCACCTGCTCCTCA----- morL 18 1
-----AGATCAGAAGGTGACTGTGGCT----- mirL 22 8353
-----AGATCAGAAGGTGACTGTGG----- mirL 20 3439
-----AGATCAGAAGGTGACTGTGGCTT----- mirL 23 2941
-----AGATCAGAAGGTGACTGTGGC----- mirL 21 2551
-----CAGATCAGAAGGTGACTGTGG----- mirL 21 1782
-----CAGATCAGAAGGTGACTGTGGC----- mirL 22 1525
-----AGATCAGAAGGTGACTGTGGCTTT----- mirL 24 1456
-----CAGATCAGAAGGTGACTGTGGCT----- mirL 23 1348
-----AGATCAGAAGGTGACTGTG----- mirL 19 934
-----AGATCAGAAGGTGACTGT----- mirL 18 729
-----CAGATCAGAAGGTGACTGTG----- mirL 20 637
-----CAGATCAGAAGGTGACTGTGGCTT----- mirL 24 612
-----CAGATCAGAAGGTGACTGT----- mirL 19 451
-----CAGATCAGAAGGTGACTGTGGCTTT----- mirL 25 399
-----GATCAGAAGGTGACTGTGGCT----- mirL 21 65
-----ATCAGAAGGTGACTGTGGCT----- mirL 20 28
-----GATCAGAAGGTGACTGTGG----- mirL 19 23
-----GATCAGAAGGTGACTGTGGC----- mirL 20 10
-----GATCAGAAGGTGACTGTGGCTT----- mirL 22 8
-----ATCAGAAGGTGACTGTGGC----- mirL 19 6
-----TCAGAAGGTGACTGTGGCT----- mirL 19 6
-----ATCAGAAGGTGACTGTGG----- mirL 18 5
-----GATCAGAAGGTGACTGTG----- mirL 18 4
-----GATCAGAAGGTGACTGTGGCTTT----- mirL 23 3
-----TCAGAAGGTGACTGTGGCTT----- mirL 20 2
-----ATCAGAAGGTGACTGTGGCTT----- mirL 21 2
-----TCAGATCAGAAGGTGACTGTGG----- mirL 22 2
-----TCAGATCAGAAGGTGACTGTGGCT----- mirL 24 1
-----TCAGATCAGAAGGTGACTGTGGC----- mirL 23 1
-----CTCAGATCAGAAGGTGACTGTG----- mirL 22 1
-----ATCAGAAGGTGACTGTGGCTTT----- mirL 22 1
-----TTTGGGTGGATATTAATCAGCC----- loop 22 1
-----CCACAGCACTGCCTGGTCAGA----- mirR 21 263
-----CCACAGCACTGCCTGGTCAGAA----- mirR 22 118
-----CCACAGCACTGCCTGGTCAGAAA----- mirR 23 53
-----CCACAGCACTGCCTGGTCAG----- mirR 20 51
-----CCACAGCACTGCCTGGTCA----- mirR 19 45
-----CCACAGCACTGCCTGGTC----- mirR 18 26
-----CACAGCACTGCCTGGTCAGAAA----- mirR 22 19
-----CACAGCACTGCCTGGTCAGAA----- mirR 20 17

```

```

-----CCACAGCACTGCCTGGTCAGAAAAG----- mirR 24 13
-----CACAGCACTGCCTGGTCAGAA----- mirR 21 10
-----CACAGCACTGCCTGGTCAGAAAAG----- mirR 23 5
-----CACAGCACTGCCTGGTCAG----- mirR 19 5
-----ACAGCACTGCCTGGTCAGAAA----- mirR 21 3
-----CAGCCACAGCACTGCCTGGTCAGAA----- mirR 25 1
-----CAGCACTGCCTGGTCAGA----- mirR 18 1
-----ACAGCACTGCCTGGTCAGAA----- mirR 20 1
-----CACAGCACTGCCTGGTCA----- mirR 18 1
-----ACAGCACTGCCTGGTCAGA----- mirR 19 1
-----GCCACAGCACTGCCTGGT----- mirR 18 1
-----AAAGAGCAAGTGCCTAG morR 18 1
-----AGAAAGAGCAAGTGCCT-- morR 18 1
-----GAAAGAGCAAGTGCCTA- morR 18 1

>mmu-mir-153
AGCTACTTAGCGGTGGCCGGTGTTCATTTTTGTGACGTTGCAGCTAGTAATATGAGCCCAGTTGCATAGTCACAAAAGTGATCATTGGAAACTGTGACTGCAGCAGGGAC species len reads
AGCTACTTAGCGGTGGCC----- morL 18 1
----CTTAGCGGTGGCCGGTGT----- morL 18 1
-GCTACTTAGCGGTGGCCG----- morL 18 1
-----GTCATTTTTGTGACGTTGCAGCT----- mirL 23 86
-----GTCATTTTTGTGACGTTGCAGC----- mirL 22 70
-----GTCATTTTTGTGACGTTGC----- mirL 19 56
-----TCATTTTTGTGACGTTGCAGCT----- mirL 22 34
-----GTCATTTTTGTGACGTTGCAG----- mirL 21 30
-----TCATTTTTGTGACGTTGCAGC----- mirL 21 25
-----GTCATTTTTGTGACGTTGCA----- mirL 20 11
-----GTCATTTTTGTGACGTTGCAGCTA----- mirL 24 8
-----TCATTTTTGTGACGTTGCAGCTA----- mirL 23 7
-----TCATTTTTGTGACGTTGC----- mirL 18 6
-----TCATTTTTGTGACGTTGCAG----- mirL 20 6
-----TCATTTTTGTGACGTTGCAGCTAG----- mirL 24 4
-----GTCATTTTTGTGACGTTGCAGCTAG----- mirL 25 3
-----GTGTCATTTTTGTGACGT----- mirL 18 2
-----TCATTTTTGTGACGTTGCA----- mirL 19 2
-----CATTTTTGTGACGTTGCAG----- mirL 19 2
-----GGTGTTCATTTTTGTGACGTTGCA----- mirL 23 1
-----CATTTTTGTGACGTTGCAGCT----- mirL 21 1
-----GTAATATGAGCCCAGTTG----- loop 18 1
-----TTGCATAGTCACAAAAGTGATC----- mirR 22 7448
-----TTGCATAGTCACAAAAGTGATCA----- mirR 23 7222
-----TTGCATAGTCACAAAAGTGATCAT----- mirR 24 4243
-----TTGCATAGTCACAAAAGTGAT----- mirR 21 3139
-----TTGCATAGTCACAAAAGTGA----- mirR 20 1600
-----TTGCATAGTCACAAAAGTG----- mirR 19 1337
-----TTGCATAGTCACAAAAGTGATCATT----- mirR 25 627

```

```

-----TGCATAGTCACAAAAGTGATCA----- mirR 22 614
-----TGCATAGTCACAAAAGTGATCAT----- mirR 23 426
-----TGCATAGTCACAAAAGTGATC----- mirR 21 342
-----TGCATAGTCACAAAAGTGAT----- mirR 20 231
-----TGCATAGTCACAAAAGTGATCATT----- mirR 24 79
-----TGCATAGTCACAAAAGTGA----- mirR 19 71
-----TGCATAGTCACAAAAGTG----- mirR 18 52
-----CATAGTCACAAAAGTGATCATT----- mirR 22 34
-----GCATAGTCACAAAAGTGATCA----- mirR 21 27
-----GCATAGTCACAAAAGTGATCAT----- mirR 22 15
-----CATAGTCACAAAAGTGATCATTG----- mirR 23 13
-----GCATAGTCACAAAAGTGAT----- mirR 19 11
-----GCATAGTCACAAAAGTGATC----- mirR 20 10
-----CATAGTCACAAAAGTGATCAT----- mirR 21 9
-----GCATAGTCACAAAAGTGA----- mirR 18 6
-----GTTGCATAGTCACAAAAGTGATC----- mirR 23 5
-----CATAGTCACAAAAGTGATC----- mirR 19 5
-----CATAGTCACAAAAGTGATCATTTGGA----- mirR 25 2
-----GCATAGTCACAAAAGTGATCATT----- mirR 23 2
-----GTTGCATAGTCACAAAAGTGA----- mirR 21 2
-----GTTGCATAGTCACAAAAG----- mirR 18 1
-----CATAGTCACAAAAGTGATCATTTGG----- mirR 24 1
-----CATAGTCACAAAAGTGATCA----- mirR 20 1
-----AGTTGCATAGTCACAAAAGTGATCAT----- mirR 26 1
-----TGGAAACTGTGACTGCAGCAGGGAC morR 25 1
-----ATTGGAAACTGTGACTGC----- morR 18 1

>mmu-mir-192
CCAAGATGGCGTGCACAGGGCTCTGACCTATGAATTGACAGCCAGTACTCTTTTCTCTCCTCTGGCTGCCAATTCATAGGTCACAGGTATGTTACCTCAATGCCA species len reads
-----ATGGCGTGCACAGGGCTC----- morL 18 1
CCAAGATGGCGTGCACAGGG----- morL 20 1
-CAAGATGGCGTGCACAGG----- morL 18 1
-----CTGACCTATGAATTGACAGCC----- mirL 21 6690
-----CTGACCTATGAATTGACAGCCA----- mirL 22 4687
-----CTGACCTATGAATTGACAGC----- mirL 20 3804
-----CTGACCTATGAATTGACAG----- mirL 19 2282
-----CTGACCTATGAATTGACA----- mirL 18 1791
-----CTGACCTATGAATTGACAGCCAG----- mirL 23 1506
-----TGACCTATGAATTGACAGCCAG----- mirL 22 699
-----TGACCTATGAATTGACAGCCA----- mirL 21 323
-----TGACCTATGAATTGACAGCCAGT----- mirL 23 283
-----CTGACCTATGAATTGACAGCCAGT----- mirL 24 269
-----TGACCTATGAATTGACAGCC----- mirL 20 256
-----TGACCTATGAATTGACAGC----- mirL 19 157
-----TGACCTATGAATTGACAGCCAGTA----- mirL 24 67
-----TGACCTATGAATTGACAG----- mirL 18 62

```

```

-----GACCTATGAATTGACAGC----- mirL 18 62
-----ACCTATGAATTGACAGCC----- mirL 18 58
-----GACCTATGAATTGACAGCC----- mirL 19 48
-----ACCTATGAATTGACAGCCA----- mirL 19 29
-----GACCTATGAATTGACAGCCAG----- mirL 21 18
-----GACCTATGAATTGACAGCCA----- mirL 20 15
-----TCTGACCTATGAATTGACAGCC----- mirL 22 4
-----GACCTATGAATTGACAGCCAGT----- mirL 22 4
-----TCTGACCTATGAATTGAC----- mirL 18 3
-----GCTCTGACCTATGAATTGA----- mirL 19 2
-----GCTCTGACCTATGAATTGAC----- mirL 20 1
-----GCTCTGACCTATGAATTG----- mirL 18 1
-----TCTGACCTATGAATTGACAGC----- mirL 21 1
-----ACTCTTTTCTCTCCTCTG----- loop 18 1
-----CTGCCAATTCATAGGTCACA----- mirR 21 1552
-----CTGCCAATTCATAGGTCACAG----- mirR 22 1328
-----CTGCCAATTCATAGGTCAC----- mirR 20 479
-----CTGCCAATTCATAGGTCACAGG----- mirR 23 247
-----CTGCCAATTCATAGGTCAC----- mirR 19 185
-----CTGCCAATTCATAGGTC----- mirR 18 46
-----TGCCAATTCATAGGTCACAG----- mirR 21 37
-----GCCAATTCATAGGTCACAG----- mirR 20 26
-----CCAATTCATAGGTCACAG----- mirR 19 26
-----GCTGCCAATTCATAGGTCACAG----- mirR 23 17
-----TGCCAATTCATAGGTCACA----- mirR 20 17
-----GCTGCCAATTCATAGGTCAC----- mirR 21 16
-----GCTGCCAATTCATAGGTCACA----- mirR 22 16
-----CTGCCAATTCATAGGTCACAGGT----- mirR 24 13
-----GCCAATTCATAGGTCACA----- mirR 19 11
-----GGCTGCCAATTCATAGGTCAC----- mirR 22 10
-----CCAATTCATAGGTCACA----- mirR 18 6
-----GCCAATTCATAGGTCAC----- mirR 18 6
-----GGCTGCCAATTCATAGGTCACA----- mirR 23 5
-----TGCCAATTCATAGGTCAC----- mirR 19 3
-----TGCCAATTCATAGGTCACAGG----- mirR 22 3
-----GCTGCCAATTCATAGGTCAC----- mirR 20 2
-----GGCTGCCAATTCATAGGTCAC----- mirR 21 2
-----GGCTGCCAATTCATAGGTCACAG----- mirR 24 2
-----GGCTGCCAATTCATAGGTCAC----- mirR 20 2
-----TGCCAATTCATAGGTCAC----- mirR 18 2
-----GGCTGCCAATTCATAGGT----- mirR 19 1
-----CCAATTCATAGGTCACAGG----- mirR 20 1
-----TGGCTGCCAATTCATAGGTCAC----- mirR 23 1
-----GCTGCCAATTCATAGGTCACAGGT----- mirR 25 1
-----ATGTTACCTCAATGCCA----- morR 18 2
-----AGGTATGTTACCTCAAT----- morR 18 1

```

```

-----AGGTATGTTACCTCAATG--- morR 19 1

>mmu-mir-1298
AGAGATGAGGGGTTAAGAGTTCATTCGGCTGTCCAGATGTACCCAAGTACCCTGTTATTTGGCAATACATACATCTGGGCAACTGATTGAACTTTTCGCTTCTCTTGACTCAACTG species len reads
AGAGATGAGGGGTTAAGAGT----- morL 19 2
-GAGATGAGGGGTTAAGAGT----- morL 19 1
--AGATGAGGGGTTAAGAGT----- morL 18 1
-GAGATGAGGGGTTAAGAGTT----- morL 20 1
-GAGATGAGGGGTTAAGAG----- morL 18 1
----ATGAGGGGTTAAGAGTTC----- morL 18 1
-----TTCATTCGGCTGTCCAGATGT----- mirL 21 11372
-----TTCATTCGGCTGTCCAGATGTAC----- mirL 23 6212
-----TTCATTCGGCTGTCCAGATGTA----- mirL 22 2827
-----TTCATTCGGCTGTCCAGATG----- mirL 20 1550
-----TTCATTCGGCTGTCCAGAT----- mirL 19 896
-----TCATTCGGCTGTCCAGATGT----- mirL 20 494
-----TTCATTCGGCTGTCCAGATGTACC----- mirL 24 481
-----TTCATTCGGCTGTCCAGA----- mirL 18 405
-----TCATTCGGCTGTCCAGATGTAC----- mirL 22 253
-----TCATTCGGCTGTCCAGATGTA----- mirL 21 173
-----TCATTCGGCTGTCCAGATG----- mirL 19 94
-----TCATTCGGCTGTCCAGAT----- mirL 18 50
-----TCATTCGGCTGTCCAGATGTACC----- mirL 23 33
-----CATTTCGGCTGTCCAGATGTAC----- mirL 21 12
-----CATTTCGGCTGTCCAGATGT----- mirL 19 9
-----TCATTCGGCTGTCCAGATGTACCC----- mirL 24 9
-----CATTTCGGCTGTCCAGATGTA----- mirL 20 9
-----ATTCGGCTGTCCAGATGTA----- mirL 19 8
-----ATTCGGCTGTCCAGATGTAC----- mirL 20 8
-----ATTCGGCTGTCCAGATGT----- mirL 18 7
-----CATTTCGGCTGTCCAGATG----- mirL 18 4
-----GAGTTCATTCGGCTGTCCA----- mirL 19 2
-----GAGTTCATTCGGCTGTCCAGATGT----- mirL 24 2
-----AGTTCATTCGGCTGTCCAGAT----- mirL 21 1
-----CATTTCGGCTGTCCAGATGTACCC----- mirL 23 1
-----GTTTCATTCGGCTGTCCAGATGT----- mirL 22 1
-----GTTTCATTCGGCTGTCCAGAT----- mirL 20 1
-----CATCTGGGCAACTGATTGAACT----- mirR 22 671
-----CATCTGGGCAACTGATTGA----- mirR 19 461
-----CATCTGGGCAACTGATTGAA----- mirR 21 198
-----CATCTGGGCAACTGATTGAACTT----- mirR 23 122
-----CATCTGGGCAACTGATTGAA----- mirR 20 92
-----CATCTGGGCAACTGATTG----- mirR 18 24
-----CATCTGGGCAACTGATTGAACTTT----- mirR 24 22
-----TACATCTGGGCAACTGATTGA----- mirR 21 6
-----ATCTGGGCAACTGATTGAA----- mirR 19 5

```

```

-----ATCTGGGCAACTGATTGA----- mirR 18 4
-----ATCTGGGCAACTGATTGAACTT----- mirR 22 3
-----ATACATCTGGGCAACTGATTG----- mirR 21 3
-----ATACATCTGGGCAACTGATTGAACT----- mirR 25 2
-----TACATCTGGGCAACTGATTGAACT----- mirR 23 2
-----TACATCTGGGCAACTGATTGAACT----- mirR 24 1
-----CTGGGCAACTGATTGAACT----- mirR 19 1
-----TACATCTGGGCAACTGATTG----- mirR 20 1
-----TCTGGGCAACTGATTGAACTTT----- mirR 22 1
-----ATCTGGGCAACTGATTGAACT----- mirR 20 1
-----CTGGGCAACTGATTGAACT----- mirR 18 1
-----ATACATCTGGGCAACTGATTGAACT----- mirR 24 1
-----TACATCTGGGCAACTGAT----- mirR 18 1
-----ACATCTGGGCAACTGATTGAACT----- mirR 22 1
-----ATACATCTGGGCAACTGATTGAACT----- mirR 22 1
-----TACATCTGGGCAACTGATTGAACTT----- mirR 25 1
-----ATCTGGGCAACTGATTGAACT----- mirR 21 1
-----TCGCTTCTCTTGACTCAACT----- morR 20 2
-----ACTTTTCGCTTCTCTTGA----- morR 18 1
-----TTCGCTTCTCTTGACTCAAC----- morR 20 1
-----CGCTTCTCTTGACTCAACTG----- morR 20 1
-----CGCTTCTCTTGACTCAAC----- morR 18 1

```

>mmu-mir-15b

```

TTGGAACCTTAAAGTACTGTAGCAGCACATCATGGTTTACATACTACAGTCAAGATGCGAATCATTATTTGCTGCTCTAGA species len reads
TTGGAACCTTAAAGTACTG----- morL 19 2
-TGGAACCTTAAAGTACTG----- morL 18 1
-----TAGCAGCACATCATGGTTTAC----- mirL 21 8366
-----TAGCAGCACATCATGGTTTAC----- mirL 20 5017
-----TAGCAGCACATCATGGTTTACA----- mirL 22 4008
-----TAGCAGCACATCATGGTTT----- mirL 19 1360
-----TAGCAGCACATCATGGTTTACAT----- mirL 23 973
-----TAGCAGCACATCATGGTT----- mirL 18 443
-----TAGCAGCACATCATGGTTTACATA----- mirL 24 311
-----AGCAGCACATCATGGTTTAC----- mirL 19 291
-----AGCAGCACATCATGGTTTAC----- mirL 20 289
-----AGCAGCACATCATGGTTTACA----- mirL 21 135
-----AGCAGCACATCATGGTTT----- mirL 18 64
-----GCAGCACATCATGGTTTAC----- mirL 18 45
-----AGCAGCACATCATGGTTTACAT----- mirL 22 38
-----CAGCACATCATGGTTTAC----- mirL 18 18
-----AGCAGCACATCATGGTTTACATA----- mirL 23 17
-----GCAGCACATCATGGTTTAC----- mirL 19 16
-----AGCAGCACATCATGGTTTACATAC----- mirL 24 6
-----CAGCACATCATGGTTTACA----- mirL 19 6
-----GCAGCACATCATGGTTTACA----- mirL 20 5

```

```

-----GTAGCAGCACATCATGGTTTAC----- mirL 22 5
-----GTAGCAGCACATCATGGTTTA----- mirL 21 3
-----CTGTAGCAGCACATCATG----- mirL 18 2
-----GTAGCAGCACATCATGGTTTACAT----- mirL 24 2
-----CAGCACATCATGGTTTACACT----- mirL 23 1
-----GTAGCAGCACATCATGGT----- mirL 18 1
-----GCAGCACATCATGGTTTACAT----- mirL 21 1
-----GTAGCAGCACATCATGGTTT----- mirL 20 1
-----TGTAGCAGCACATCATGGTTTAC----- mirL 23 1
-----CGAATCATTATTTGCTGCTCTA-- mirR 22 2529
-----CGAATCATTATTTGCTGCTCT-- mirR 21 854
-----CGAATCATTATTTGCTGCTC--- mirR 20 484
-----CGAATCATTATTTGCTGCT--- mirR 19 348
-----CGAATCATTATTTGCTGCTCTAG- mirR 23 201
-----GAATCATTATTTGCTGCTCTA-- mirR 21 115
-----CGAATCATTATTTGCTGCTC--- mirR 18 99
-----AATCATTATTTGCTGCTCTA-- mirR 20 64
-----ATCATTATTTGCTGCTCTA-- mirR 19 52
-----GAATCATTATTTGCTGCTCT-- mirR 20 43
-----ATCATTATTTGCTGCTCT-- mirR 18 35
-----AATCATTATTTGCTGCTCT-- mirR 19 32
-----GAATCATTATTTGCTGCTC--- mirR 19 30
-----AATCATTATTTGCTGCTC--- mirR 18 14
-----CGAATCATTATTTGCTGCTCTAGA mirR 24 13
-----GAATCATTATTTGCTGCTCTAG- mirR 22 9
-----GAATCATTATTTGCTGCT---- mirR 18 6
-----GCGAATCATTATTTGCTGCT---- mirR 20 5
-----GCGAATCATTATTTGCTGCTC--- mirR 21 5
-----TGCGAATCATTATTTGCTGCTC--- mirR 22 3
-----ATCATTATTTGCTGCTCTAG- mirR 20 3
-----TGCGAATCATTATTTGCTGCT---- mirR 21 2
-----GCGAATCATTATTTGCTGCTCTAG- mirR 24 1
-----GAATCATTATTTGCTGCTCTAGA mirR 23 1
-----GCGAATCATTATTTGCTG---- mirR 18 1

>mmu-mir-433
AAGACCCAATGCCCGGGGAGAAGTACGGTGAGCCTGTCATTATTCAGAGAGGCTAGATCCTCTGTGTTGAGAAGGATCATGATGGGCTCCTCGGTGTTCTCCAGGTAGCGGCACCACACCA species len reads
---ACCCAATGCCCGGGGAGAAG----- morL 20 10
AAGACCCAATGCCCGGGGAGAAG----- morL 23 1
---GACCCAATGCCCGGGGAGAA----- morL 20 1
---CCAATGCCCGGGGAGAAG----- morL 18 1
---ACCCAATGCCCGGGGAGAAGT----- morL 21 1
---CCCAATGCCCGGGGAGAA----- morL 18 1
---GACCCAATGCCCGGGGAGAAG----- morL 21 1
-----TACGGTGAGCCTGTCATTATTC----- mirL 22 1018
-----TACGGTGAGCCTGTCATTATTC----- mirL 21 441

```



```

-----TACGGTGAGCCTGTCATTAT----- mirL 20 437
-----TACGGTGAGCCTGTCATT----- mirL 18 219
-----TACGGTGAGCCTGTCATTATTCA----- mirL 23 153
-----TACGGTGAGCCTGTCATTA----- mirL 19 124
-----ACGGTGAGCCTGTCATTATTC----- mirL 21 50
-----ACGGTGAGCCTGTCATTAT----- mirL 19 20
-----TACGGTGAGCCTGTCATTATTCAG----- mirL 24 15
-----ACGGTGAGCCTGTCATTAT----- mirL 20 15
-----ACGGTGAGCCTGTCATTATTCA----- mirL 22 12
-----ACGGTGAGCCTGTCATTA----- mirL 18 8
-----CGGTGAGCCTGTCATTATTC----- mirL 20 7
-----GGTGAGCCTGTCATTATTC----- mirL 19 5
-----CGGTGAGCCTGTCATTATT----- mirL 19 3
-----GGTGAGCCTGTCATTAT----- mirL 18 3
-----CGGTGAGCCTGTCATTAT----- mirL 18 3
-----CGGTGAGCCTGTCATTATFCA----- mirL 21 2
-----GTACGGTGAGCCTGTCATTATTC----- mirL 23 1
-----ACGGTGAGCCTGTCATTATTCAGA----- mirL 24 1
-----ATCATGATGGGCTCCTCGGTGT----- mirR 22 13241
-----ATCATGATGGGCTCCTCGGTGTT----- mirR 23 3271
-----ATCATGATGGGCTCCTCGGT----- mirR 20 1704
-----ATCATGATGGGCTCCTCGG----- mirR 19 1496
-----ATCATGATGGGCTCCTCGGTG----- mirR 21 1423
-----ATCATGATGGGCTCCTCGGTGTT----- mirR 24 1250
-----ATCATGATGGGCTCCTCG----- mirR 18 562
-----TCATGATGGGCTCCTCGGTGT----- mirR 21 295
-----GATCATGATGGGCTCCTCGGTGT----- mirR 23 135
-----CATGATGGGCTCCTCGGTGT----- mirR 20 69
-----TCATGATGGGCTCCTCGGTGTT----- mirR 22 65
-----TCATGATGGGCTCCTCGGT----- mirR 19 36
-----TCATGATGGGCTCCTCGGTG----- mirR 20 31
-----TCATGATGGGCTCCTCGGTGTT----- mirR 23 29
-----GATCATGATGGGCTCCTCGG----- mirR 20 28
-----GATCATGATGGGCTCCTCGGTGTT----- mirR 24 20
-----GATCATGATGGGCTCCTCGGTG----- mirR 22 19
-----TCATGATGGGCTCCTCGG----- mirR 18 18
-----GATCATGATGGGCTCCTCGGT----- mirR 21 17
-----CATGATGGGCTCCTCGGTGTT----- mirR 21 17
-----GATCATGATGGGCTCCTCG----- mirR 18 12
-----GATCATGATGGGCTCCTCG----- mirR 19 11
-----CATGATGGGCTCCTCGGTG----- mirR 19 7
-----CATGATGGGCTCCTCGGT----- mirR 18 7
-----ATGATGGGCTCCTCGGTGT----- mirR 19 6
-----CATGATGGGCTCCTCGGTGTT----- mirR 22 5
-----TCATGATGGGCTCCTCGGTGTTCT----- mirR 24 3
-----TCTCCAGGTAGCGGCACC----- morR 18 2

```

```

-----TCTCCAGGTAGCGGCACCACACCA morR 24 1

>mmu-mir-874
ATTTTTGGTGTTAGCCCTGCGGCCCCACGCACCAGGGTAAGAGAGACTCACTTCTGCCCTGGCCCCAGGGACCGACTGG species len reads
--TTTTGGTGTTAGCCCTG----- morL 18 1
ATTTTTGGTGTTAGCCC----- morL 18 1
-----CGGCCCCACGCACCAGGGTAA----- mirL 21 1909
-----CGGCCCCACGCACCAGGGTAAG----- mirL 22 1673
-----CGGCCCCACGCACCAGGGTAAGA----- mirL 23 1132
-----CGGCCCCACGCACCAGGGTAAGAG----- mirL 24 350
-----CGGCCCCACGCACCAGGGTA----- mirL 20 250
-----CGGCCCCACGCACCAGGG----- mirL 18 132
-----CGGCCCCACGCACCAGGGT----- mirL 19 94
-----GCGGCCCCACGCACCAGGGTAA----- mirL 22 59
-----GCCCCACGCACCAGGGTAAGA----- mirL 21 52
-----GCCCCACGCACCAGGGTAAG----- mirL 20 29
-----GGCCCCACGCACCAGGGTAAG----- mirL 21 28
-----GGCCCCACGCACCAGGGTAA----- mirL 20 24
-----GCGGCCCCACGCACCAGGGTAAGA----- mirL 24 9
-----GCGGCCCCACGCACCAGGGTAAG----- mirL 23 9
-----GGCCCCACGCACCAGGGTAAGA----- mirL 22 8
-----GCCCCACGCACCAGGGTAA----- mirL 19 8
-----GCCCCACGCACCAGGGTAAGAG----- mirL 22 6
-----GCGGCCCCACGCACCAGG----- mirL 18 5
-----GCGGCCCCACGCACCAGGG----- mirL 19 4
-----GGCCCCACGCACCAGGGTAAGAG----- mirL 23 4
-----GCGGCCCCACGCACCAGGGTA----- mirL 21 4
-----GCCCCACGCACCAGGGTA----- mirL 18 3
-----GGCCCCACGCACCAGGGT----- mirL 18 2
-----CCCCACGCACCAGGGTAAG----- mirL 19 1
-----GCGGCCCCACGCACCAGGGTAAGAG----- mirL 25 1
-----GGCCCCACGCACCAGGGTAAGAGA----- mirL 24 1
-----CTGCGGCCCCACGCACCA----- mirL 18 1
-----TAAGAGAGACTCACTTCC----- loop 18 1
-----AAGAGAGACTCACTTCCTG----- loop 19 1
-----CTGCCCTGGCCCCAGGGACCGAC--- mirR 23 9517
-----CTGCCCTGGCCCCAGGGACCGA--- mirR 22 6909
-----CTGCCCTGGCCCCAGGGAC----- mirR 19 869
-----CTGCCCTGGCCCCAGGGACC----- mirR 20 720
-----CTGCCCTGGCCCCAGGGACCGACT-- mirR 24 560
-----CTGCCCTGGCCCCAGGGACCG----- mirR 21 420
-----TGCCCTGGCCCCAGGGACCGA--- mirR 21 318
-----CTGCCCTGGCCCCAGGGGA----- mirR 18 222
-----TGCCCTGGCCCCAGGGACCGAC--- mirR 22 73
-----TGCCCTGGCCCCAGGGAC----- mirR 18 27
-----GCCCTGGCCCCAGGGACCGA--- mirR 20 25

```

```

-----TGCCCTGGCCCGAGGGACCG----- mirR 20 17
-----TGCCCTGGCCCGAGGGACCG----- mirR 19 17
-----TGCCCTGGCCCGAGGGACCGACTG- mirR 24 10
-----GCCCTGGCCCGAGGGACCGAC--- mirR 21 10
-----TGCCCTGGCCCGAGGGACCGACT-- mirR 23 7
-----GCCCTGGCCCGAGGGACCG----- mirR 19 7
-----CCTGCCCTGGCCCGAGGGACCGAC-- mirR 24 4
-----CCCTGGCCCGAGGGACCG----- mirR 18 3
-----CCCTGGCCCGAGGGACCGA--- mirR 19 3
-----GCCCTGGCCCGAGGGACCGACT-- mirR 22 2
-----TCCTGCCCTGGCCCGAGGG----- mirR 19 2
-----CCCTGGCCCGAGGGACCGACT-- mirR 21 2
-----CCCTGGCCCGAGGGACCGAC--- mirR 20 2
-----CCTGCCCTGGCCCGAGGGACCGA--- mirR 23 2
-----CCTGCCCTGGCCCGAGGGA----- mirR 19 1
-----CCCTGGCCCGAGGGACCGACTGG mirR 23 1
-----CCTGCCCTGGCCCGAGGGACC----- mirR 21 1

```

>mmu-mir-92a-2

```

TCCATGCCCATTCATCCACAGGTGGGGATTGGTGGCATTACTTGTGTTAGATATAAAGTATTGCACTTGTCCCGCCTGAGGAAGAAAGAGGGTTTTTAA species len reads
---ATGCCCATTCATCCACAG----- morL 18 1
TCCATGCCCATTCATCCA----- morL 18 1
-----AGGTGGGGATTGGTGGCATT----- mirL 21 973
-----AGGTGGGGATTGGTGGCATTAC----- mirL 22 715
-----AGGTGGGGATTGGTGGCATT----- mirL 20 125
-----AGGTGGGGATTGGTGGCATTACT----- mirL 23 55
-----AGGTGGGGATTGGTGGCAT----- mirL 19 48
-----GGTGGGGATTGGTGGCATT----- mirL 20 33
-----GGTGGGGATTGGTGGCATTAC----- mirL 21 26
-----GTGGGGATTGGTGGCATT----- mirL 19 25
-----GTGGGGATTGGTGGCATTAC----- mirL 20 18
-----AGGTGGGGATTGGTGGCA----- mirL 18 16
-----TGGGGATTGGTGGCATT----- mirL 18 14
-----GGTGGGGATTGGTGGCATT----- mirL 19 6
-----TGGGGATTGGTGGCATTAC----- mirL 19 4
-----GGTGGGGATTGGTGGCAT----- mirL 18 4
-----GGTGGGGATTGGTGGCATTACT----- mirL 22 3
-----GTGGGGATTGGTGGCATT----- mirL 18 3
-----CAGGTGGGGATTGGTGGCATT----- mirL 22 2
-----CACAGGTGGGGATTGGTGGCA----- mirL 21 1
-----AGGTGGGGATTGGTGGCATTACTTGT----- mirL 26 1
-----TATTGCACTTGTCCCGCCTGA----- mirR 22 8977
-----TATTGCACTTGTCCCGCCTG----- mirR 21 2830
-----TATTGCACTTGTCCCGCCTGAGG----- mirR 24 2370
-----TATTGCACTTGTCCCGCCTGAG----- mirR 23 2057
-----TATTGCACTTGTCCCGCC----- mirR 19 1996

```

```

-----TATTGCACTTGTCCCGGC----- mirR 18 1489
-----TATTGCACTTGTCCCGCCT----- mirR 20 1130
-----ATTGCACTTGTCCCGGCCTG----- mirR 20 459
-----ATTGCACTTGTCCCGGCCTGA----- mirR 21 227
-----ATTGCACTTGTCCCGGCCTGAG----- mirR 23 215
-----ATTGCACTTGTCCCGGCCT----- mirR 19 153
-----ATTGCACTTGTCCCGGCCTGAG----- mirR 22 106
-----ATTGCACTTGTCCCGGC----- mirR 18 92
-----TGCACCTTGTCCCGGCCTG----- mirR 18 53
-----TTGCACTTGTCCCGGCCTG----- mirR 19 28
-----TGCACCTTGTCCCGGCCTGA----- mirR 19 14
-----ATTGCACTTGTCCCGGCCTGAGGA----- mirR 24 10
-----TTGCACTTGTCCCGGCCTGA----- mirR 20 9
-----TTGCACTTGTCCCGGCCT----- mirR 18 6
-----TGCACCTTGTCCCGGCCTGAG----- mirR 20 4
-----TTGCACTTGTCCCGGCCTGAG----- mirR 22 3
-----GTATTGCACTTGTCCCGGC----- mirR 20 1
-----TTGCACTTGTCCCGGCCTGAG----- mirR 21 1
-----AAGTATTGCACTTGTCCC----- mirR 18 1
-----TGAGGAAGAAAGAGGGTT----- morR 18 2
-----TGAGGAAGAAAGAGGGTTT----- morR 19 2
-----AAGAAAGAGGGTTTTTAA morR 18 1
-----AGGAAGAAAGAGGGTTTTT--- morR 18 1
-----GAAGAAAGAGGGTTTTTA- morR 18 1

```

>mmu-mir-544

```

GGATCTTGTAAAAAGCAGAGTCTGATTGAGGGGCCAAGATTCTGCATTTTTAGCAAGCTCTCAAGTGATGCTAATGCTGCCGGT species len reads
---TCTTGTAAAAAGCAGAGTCT----- mirL 21 1674
---CTTGTAAAAAGCAGAGTCT----- mirL 20 1139
---TCTTGTAAAAAGCAGAGTCTG----- mirL 22 308
---TCTTGTAAAAAGCAGAGT----- mirL 19 275
---TCTTGTAAAAAGCAGAGTCT----- mirL 20 176
---CTTGTAAAAAGCAGAGTCTG----- mirL 21 121
---CTTGTAAAAAGCAGAGT----- mirL 18 80
---CTTGTAAAAAGCAGAGTCT----- mirL 19 73
---ATCTTGTAAAAAGCAGAGTCT----- mirL 22 37
---CTTGTAAAAAGCAGAGTCTGA----- mirL 22 25
---TCTTGTAAAAAGCAGAG----- mirL 18 19
---TCTTGTAAAAAGCAGAGTCTGA----- mirL 23 5
---ATCTTGTAAAAAGCAGAGTCTG----- mirL 23 3
---ATCTTGTAAAAAGCAGAGTCT----- mirL 21 3
---CTTGTAAAAAGCAGAGTCTGAT----- mirL 23 2
---TCTTGTAAAAAGCAGAGTCTGATT----- mirL 25 1
---ATCTTGTAAAAAGCAGAG----- mirL 19 1
GGATCTTGTAAAAAGCAGAG----- mirL 21 1
---CTTGTAAAAAGCAGAGTCTGATT----- mirL 25 1

```

```

GGATCTTGTTAAAAAGCAGAGTCT----- mirL 24 1
-GATCTTGTTAAAAAGCAGAG----- mirL 20 1
-GATCTTGTTAAAAAGCAGAGTCT----- mirL 23 1
-----CTGATTGAGGGCCAAGA----- loop 18 3
-----ATTCTGCATTTTGTAGCAAGCTC----- mirR 22 9354
-----ATTCTGCATTTTGTAGCAAGCTCT----- mirR 23 6081
-----ATTCTGCATTTTGTAGCAAGCT----- mirR 21 2097
-----ATTCTGCATTTTGTAGCAAGC----- mirR 20 1008
-----ATTCTGCATTTTGTAGCAAG----- mirR 19 549
-----ATTCTGCATTTTGTAGCAAGCTCTC----- mirR 24 317
-----ATTCTGCATTTTGTAGCAA----- mirR 18 299
-----TCTGCATTTTGTAGCAAGCTC----- mirR 20 87
-----GATTCTGCATTTTGTAGCAAGCT----- mirR 22 61
-----TTCTGCATTTTGTAGCAAGCTC----- mirR 21 57
-----CTGCATTTTGTAGCAAGCTC----- mirR 19 43
-----TCTGCATTTTGTAGCAAGCTCT----- mirR 21 42
-----AGATTCTGCATTTTGTAGCAAGCT----- mirR 23 22
-----TCTGCATTTTGTAGCAAGCT----- mirR 19 22
-----TTCTGCATTTTGTAGCAAGCTCT----- mirR 22 20
-----TCTGCATTTTGTAGCAAGC----- mirR 18 19
-----GATTCTGCATTTTGTAGCAAGCTC----- mirR 23 16
-----AGATTCTGCATTTTGTAGCAAGCTC----- mirR 24 16
-----TTCTGCATTTTGTAGCAAGCT----- mirR 20 15
-----CTGCATTTTGTAGCAAGCT----- mirR 18 15
-----AGATTCTGCATTTTGTAGCAAGC----- mirR 22 10
-----GATTCTGCATTTTGTAGCAAGCTCT----- mirR 24 9
-----TTCTGCATTTTGTAGCAAGC----- mirR 19 8
-----TTCTGCATTTTGTAGCAAG----- mirR 18 7
-----AGATTCTGCATTTTGTAGC----- mirR 18 5
-----AGATTCTGCATTTTGTAGCAAGCTCT----- mirR 25 4
-----GATTCTGCATTTTGTAGCAA----- mirR 19 3
-----TCTGCATTTTGTAGCAAGCTCTC----- mirR 22 3
-----AGATTCTGCATTTTGTAGCA----- mirR 19 2
-----CTGCATTTTGTAGCAAGCTCT----- mirR 20 2
-----GATTCTGCATTTTGTAGCAAGC----- mirR 21 2
-----AGATTCTGCATTTTGTAGCAAG----- mirR 21 2
-----TCTGCATTTTGTAGCAAGCTCTCA----- mirR 23 1
-----AAGATTCTGCATTTTGTAGCAAGC----- mirR 23 1
-----GATTCTGCATTTTGTAGCAAG----- mirR 20 1
-----TTCTGCATTTTGTAGCAAGCTCTC----- mirR 23 1
-----CTCAAGTGATGCTAATGCTGCCGGT morR 25 1

```

>mmu-mir-339

```

AGCTGGACGGGGTGGCCACTATCCCTGTCCCTCCAGGAGCTCACGTATGCCTGCCTGTGAGCGCCTCGGCGACAGAGCCGGTGTCCACCCCTGCACTGT species len reads
AGCTGGACGGGGTGGCCACTAT----- morL 22 3
AGCTGGACGGGGTGGCCACTA----- morL 21 2

```

```

-----GACGGGGTGGCCACTATC----- morL 18 2
-GCTGGACGGGGTGGCCACT----- morL 19 1
AGCTGGACGGGGTGGCCAC----- morL 19 1
-GCTGGACGGGGTGGCCACTATC----- morL 22 1
-GCTGGACGGGGTGGCCACTAT----- morL 21 1
---TGGACGGGGTGGCCACTA----- morL 18 1
-----TCCCTGTCCTCCAGGAGCTCAC----- mirL 22 6642
-----TCCCTGTCCTCCAGGAGCTCA----- mirL 21 6542
-----TCCCTGTCCTCCAGGAGCTC----- mirL 20 4227
-----TCCCTGTCCTCCAGGAGCTCACG----- mirL 23 2181
-----TCCCTGTCCTCCAGGAGCTCACGT----- mirL 24 1184
-----TCCCTGTCCTCCAGGAGCT----- mirL 19 897
-----TCCCTGTCCTCCAGGAGC----- mirL 18 370
-----CCCTGTCCTCCAGGAGCTCA----- mirL 20 104
-----ATCCCTGTCCTCCAGGAGCTCA----- mirL 22 82
-----CCCTGTCCTCCAGGAGCTCAC----- mirL 21 61
-----ATCCCTGTCCTCCAGGAGCTCAC----- mirL 23 59
-----CCCTGTCCTCCAGGAGCTC----- mirL 19 50
-----CCCTGTCCTCCAGGAGCTCACG----- mirL 22 45
-----CCCTGTCCTCCAGGAGCTCACGT----- mirL 23 33
-----CTGTCCTCCAGGAGCTCA----- mirL 18 31
-----CTGTCCTCCAGGAGCTCAC----- mirL 19 25
-----ATCCCTGTCCTCCAGGAGCTC----- mirL 21 24
-----CTGTCCTCCAGGAGCTCACG----- mirL 20 17
-----CCCTGTCCTCCAGGAGCT----- mirL 18 10
-----ATCCCTGTCCTCCAGGAGCT----- mirL 20 9
-----ATCCCTGTCCTCCAGGAGC----- mirL 19 4
-----CCCTGTCCTCCAGGAGCTCACGTAT----- mirL 25 3
-----CCTGTCCTCCAGGAGCTCAC----- mirL 20 2
-----CTGTCCTCCAGGAGCTCACGT----- mirL 21 2
-----ATCCCTGTCCTCCAGGAGCTCACG----- mirL 24 2
-----CCTGTCCTCCAGGAGCTCACG----- mirL 21 2
-----TATCCCTGTCCTCCAGGAGCTC----- mirL 22 1
-----CCTGTCCTCCAGGAGCTC----- mirL 18 1
-----ATCCCTGTCCTCCAGGAGCTCACGT----- mirL 25 1
-----TGAGCGCCTCGGCGACAGAGCCG----- mirR 23 477
-----TGAGCGCCTCGGCGACAGAGCCGG----- mirR 24 285
-----TGAGCGCCTCGGCGACAGAGCC----- mirR 22 91
-----AGCGCCTCGGCGACAGAGCCG----- mirR 21 74
-----TGAGCGCCTCGGCGACAGA----- mirR 19 71
-----GAGCGCCTCGGCGACAGAGCCG----- mirR 22 71
-----TGAGCGCCTCGGCGACAGAGC----- mirR 21 61
-----TGAGCGCCTCGGCGACAGAG----- mirR 20 47
-----AGCGCCTCGGCGACAGAGCCGG----- mirR 22 46
-----GCGCCTCGGCGACAGAGCCG----- mirR 20 26
-----TGAGCGCCTCGGCGACAGAGCCGGT----- mirR 25 25

```

```

-----GAGCGCCTCGGCGACAGAGCCGG----- mirR 23 23
-----AGCGCCTCGGCGACAGAGC----- mirR 19 22
-----AGCGCCTCGGCGACAGAGCC----- mirR 20 17
-----GAGCGCCTCGGCGACAGAGCC----- mirR 21 16
-----AGCGCCTCGGCGACAGAGCCGGT----- mirR 23 11
-----GAGCGCCTCGGCGACAGAGC----- mirR 20 8
-----GCGCCTCGGCGACAGAGCCGG----- mirR 21 6
-----AGCGCCTCGGCGACAGAG----- mirR 18 6
-----GAGCGCCTCGGCGACAGAGCCGGT----- mirR 24 3
-----GAGCGCCTCGGCGACAGAG----- mirR 19 3
-----AGCGCCTCGGCGACAGAGCCGGTG----- mirR 24 2
-----GAGCGCCTCGGCGACAGA----- mirR 18 1
-----TGTCCACCCTGCACTGT morR 18 3
-----GGTGTCCACCCTGCACT-- morR 18 1

>mmu-mir-1-1
AACCTACCTGCTTGGGACACATACTTCTTTATATGCCCATATGAACCTGCTAAGCTATGGAATGTAAAGAAGTATGTATTTTCAGGCTAGGAACCTCTCTCG species len reads
AACCTACCTGCTTGGGAC----- morL 18 18
--CCTACCTGCTTGGGACACA----- morL 19 2
AACCTACCTGCTTGGGACACA----- morL 21 2
-ACCTACCTGCTTGGGACA----- morL 18 1
-----ACATACTTCTTTATATGCCCAT----- mirL 22 139
-----ACATACTTCTTTATATGCCCAT----- mirL 23 112
-----ACACATACTTCTTTATATGCC----- mirL 22 47
-----ACATACTTCTTTATATGCC----- mirL 20 30
-----ATACTTCTTTATATGCC----- mirL 18 26
-----CATACTTCTTTATATGCC----- mirL 19 12
-----ACACATACTTCTTTATATGCC----- mirL 21 9
-----CATACTTCTTTATATGCC----- mirL 18 8
-----ACATACTTCTTTATATGCCCA----- mirL 21 8
-----CACATACTTCTTTATATGCC----- mirL 20 6
-----ACATACTTCTTTATATGCC----- mirL 19 5
-----CACATACTTCTTTATATGCC----- mirL 21 5
-----ACATACTTCTTTATATGCCCAT----- mirL 24 4
-----CATACTTCTTTATATGCCCA----- mirL 20 2
-----ACACATACTTCTTTATATG----- mirL 19 2
-----ACATACTTCTTTATATGC----- mirL 18 2
-----ACACATACTTCTTTATATGCCCA----- mirL 23 2
-----TACTTCTTTATATGCCATA----- mirL 20 1
-----CACATACTTCTTTATATGCCCA----- mirL 22 1
-----ATACTTCTTTATATGCCCAT----- mirL 20 1
-----ATGAACCTGCTAAGCTATG----- loop 19 1
-----ATATGAACCTGCTAAGCT----- loop 18 1
-----TGAATGTAAAGAAGTATGT----- mirR 22 9779
-----TGAATGTAAAGAAGTATGT----- mirR 20 5272
-----TGAATGTAAAGAAGTATG----- mirR 19 2714

```

```

-----TGGGAATGTAAGAAGTATGTA----- mirR 21 1731
-----TGGGAATGTAAGAAGTAT----- mirR 18 1671
-----TGGGAATGTAAGAAGTATGTATT----- mirR 23 700
-----GGAATGTAAGAAGTATGTAT----- mirR 21 484
-----GGAATGTAAGAAGTATGT----- mirR 19 362
-----GGAATGTAAGAAGTATG----- mirR 18 309
-----TGGGAATGTAAGAAGTATGTATTT----- mirR 24 184
-----GAATGTAAGAAGTATGT----- mirR 18 110
-----GGAATGTAAGAAGTATGTA----- mirR 20 102
-----GGAATGTAAGAAGTATGTATT----- mirR 22 39
-----GAATGTAAGAAGTATGTAT----- mirR 20 30
-----AATGTAAGAAGTATGTAT----- mirR 19 17
-----GAATGTAAGAAGTATGTA----- mirR 19 17
-----AATGTAAGAAGTATGTA----- mirR 18 12
-----GGAATGTAAGAAGTATGTATTT----- mirR 23 5
-----ATGGAATGTAAGAAGTATGT----- mirR 21 5
-----ATGGAATGTAAGAAGTATGTAT----- mirR 23 4
-----ATGGAATGTAAGAAGTATG----- mirR 20 3
-----ATGGAATGTAAGAAGTA----- mirR 18 2
-----GGAATGTAAGAAGTATGTATTTCA----- mirR 25 2
-----GAATGTAAGAAGTATGTATT----- mirR 21 2
-----ATGGAATGTAAGAAGTAT----- mirR 19 2
-----TATGGAATGTAAGAAGTA----- mirR 19 1
-----TATGGAATGTAAGAAGT----- mirR 18 1
-----CAGGCTAGGAACTCTCTCG morR 19 1
-----AGGCTAGGAACTCTCTCG morR 18 1

```

>mmu-mir-671

```

CTGGCAGGCCAGGAAGAGGAGGAAGCCCTGGAGGGGCTGGAGGTGATGGATGTTTTCTCCGGTTCTCAGGGCTCCACCTCT species len reads
---GCAGGCCAGGAAGAGGAG----- morL 18 1
CTGGCAGGCCAGGAAGAGG----- morL 19 1
-----AGGAAGCCCTGGAGGGGCTGGAGGT----- mirL 25 8827
-----AGGAAGCCCTGGAGGGGCTGGAGG----- mirL 24 3546
-----AGGAAGCCCTGGAGGGGCTGGAG----- mirL 23 1930
-----AGGAAGCCCTGGAGGGGCTGG----- mirL 21 1065
-----AGGAAGCCCTGGAGGGGCTGGAGGT----- mirL 26 878
-----AGGAAGCCCTGGAGGGGCT----- mirL 18 812
-----AGGAAGCCCTGGAGGGGCTGGA----- mirL 22 793
-----GGAAGCCCTGGAGGGGCTGGAGGT----- mirL 24 89
-----GGAAGCCCTGGAGGGGCTGGAG----- mirL 22 19
-----GGAAGCCCTGGAGGGGCTGGAGG----- mirL 23 16
-----GGAAGCCCTGGAGGGGCTGGAGGT----- mirL 25 13
-----GAGGAAGCCCTGGAGGGGCTGGAGGT----- mirL 26 9
-----GAAGCCCTGGAGGGGCTGGAGGT----- mirL 23 8
-----GAAGCCCTGGAGGGGCTGGAG----- mirL 21 7
-----GGAAGCCCTGGAGGGGCTG----- mirL 19 5

```



```

-----GAAGCCCTGGAGGGGCTGGAG----- mirL 22 5
-----GAAGCCCTGGAGGGGCTGGA----- mirL 20 5
-----GGAAGCCCTGGAGGGGCTGGA----- mirL 21 4
-----GGAAGCCCTGGAGGGGCTGG----- mirL 20 4
-----AAGCCCTGGAGGGGCTGGAG----- mirL 20 2
-----AAGCCCTGGAGGGGCTGGA----- mirL 19 2
-----GAAGCCCTGGAGGGGCTG----- mirL 18 1
-----AGGAGGAAGCCCTGGAGGG----- mirL 19 1
-----GAGGAAGCCCTGGAGGG----- mirL 18 1
-----AGGAGGAAGCCCTGGAGGG----- mirL 20 1
-----AAGCCCTGGAGGGGCTGGAGGT----- mirL 22 1
-----GAGGAAGCCCTGGAGGGGCTGGAG----- mirL 24 1
-----GGAGGAAGCCCTGGAGGG----- mirL 18 1
-----GAAGCCCTGGAGGGGCTGGAGGTG----- mirL 24 1
-----AAGCCCTGGAGGGGCTGG----- mirL 18 1
-----TCCGGTTCTCAGGGCTCCACC--- mirR 21 2074
-----TCCGGTTCTCAGGGCTCCACCT-- mirR 22 1504
-----TCCGGTTCTCAGGGCTCCACCTC- mirR 23 1007
-----TCCGGTTCTCAGGGCTCCAC--- mirR 20 564
-----TCCGGTTCTCAGGGCTCCA---- mirR 19 260
-----TCCGGTTCTCAGGGCTCC----- mirR 18 175
-----TCCGGTTCTCAGGGCTCCACCTCT mirR 24 122
-----GGTTCTCAGGGCTCCACC--- mirR 18 29
-----CCGGTTCTCAGGGCTCCACCT-- mirR 21 21
-----CTCCGGTTCTCAGGGCTCCACC--- mirR 22 20
-----CCGGTTCTCAGGGCTCCACC--- mirR 20 18
-----GGTTCTCAGGGCTCCACCT-- mirR 19 17
-----CGGTTCTCAGGGCTCCAC--- mirR 18 11
-----CTCCGGTTCTCAGGGCTCCACCT-- mirR 23 9
-----CTCCGGTTCTCAGGGCTCCAC--- mirR 21 7
-----CCGGTTCTCAGGGCTCCACCTC- mirR 22 7
-----CTCCGGTTCTCAGGGCTCCACCTC- mirR 24 5
-----CGGTTCTCAGGGCTCCACC--- mirR 19 5
-----CTCCGGTTCTCAGGGCTCCA---- mirR 20 4
-----CTCCGGTTCTCAGGGCTC----- mirR 18 3
-----TCCTCCGGTTCTCAGGGCTCC----- mirR 21 3
-----CCTCCGGTTCTCAGGGCTCCACCT-- mirR 24 3
-----CCTCCGGTTCTCAGGGCTCCACC--- mirR 23 3
-----CCGGTTCTCAGGGCTCCA---- mirR 18 2
-----CCGGTTCTCAGGGCTCCAC--- mirR 19 2
-----CCGGTTCTCAGGGCTCCACCTCT mirR 23 2
-----TCCTCCGGTTCTCAGGGCTCCA---- mirR 22 1
-----TCCTCCGGTTCTCAGGGCTCCACC--- mirR 24 1
-----CGGTTCTCAGGGCTCCACCT-- mirR 20 1
-----CTCCGGTTCTCAGGGCTCCACCTCT mirR 25 1
-----TCCTCCGGTTCTCAGGGCTC----- mirR 20 1

```

>mmu-mir-199b

```
AGAGGATACCTCCACTCCGTCTACCCAGTGTTTAGACTACCTGTTCCAGGACTCCCAAATTGTACAGTAGTCTGCACATTGGTTAGGCTGGGCTGGGTTAGACCCCTCGGCACCGTCGCTGGAGAGCCGCACCAACCCCCCTG
AGAGGATACCTCCACTCCGT-----
-----ACCTCCACTCCGTCTACC-----
-----CCAGTGTTTAGACTACCTGTTCC-----
-----CCAGTGTTTAGACTACCTGTT-----
-----CCAGTGTTTAGACTACCTGT-----
-----CCAGTGTTTAGACTACCTGTTCA-----
-----CCAGTGTTTAGACTACCTGTT-----
-----CCAGTGTTTAGACTACCTG-----
-----CCAGTGTTTAGACTACCT-----
-----CCAGTGTTTAGACTACCTGTTCC-----
-----AGTGTTTAGACTACCTGTTCC-----
-----CAGTGTTTAGACTACCTGTTCC-----
-----AGTGTTTAGACTACCTGTT-----
-----CCAGTGTTTAGACTACCTGTT-----
-----CAGTGTTTAGACTACCTGTT-----
-----ACCCAGTGTTTAGACTACCTGTTCC-----
-----CCAGTGTTTAGACTACCTGT-----
-----ACCCAGTGTTTAGACTACCTGTT-----
-----CCAGTGTTTAGACTACCTG-----
-----CCAGTGTTTAGACTACCTGTTCA-----
-----TACCCAGTGTTTAGACTACCTGTTCC-----
-----CAGTGTTTAGACTACCTGT-----
-----AGTGTTTAGACTACCTGT-----
-----CCAGTGTTTAGACTACCT-----
-----CAGTGTTTAGACTACCTG-----
-----GGAGAGCCGCACCAACCC-----
-----AGAGCCGCACCAACCCCC-----
-----TG
-----CCCCTG
-----CTG
```

>mmu-mir-341

```
AGGGTGAGGTTAGGGTTAAATGATGATGTCAGTTGGCCGGTCGGCCGATCGCTCGGTCTGTCAGTCAGTCGGTCGGTCGGTCGGTCAGTCGGCTTCTGTCTTCGAACTGC species len reads
AGGGTGAGGTTAGGGTTA----- morL 18 1
GGGTGAGGTTAGGGTTAA----- morL 18 1
-----AAAATGATGATGTCAGTT----- mirL 18 2
-----TAAAATGATGATGTCAGT----- mirL 18 1
-----AAATGATGATGTCAGTTGGC----- mirL 20 1
-----ATGATGATGTCAGTTGGC----- mirL 18 1
-----TCGATCGGTTCGGTCGGTCAGT----- mirR 21 11296
-----TCGATCGGTTCGGTCGGTCAGTC----- mirR 22 3699
-----TCGATCGGTTCGGTCGGTCAG----- mirR 20 2527
-----TCGATCGGTTCGGTCGGTCA----- mirR 19 1712
```

```

-----TCGATCGGTCGGTCGGTCAGTC----- mirR 23 1228
-----GTCGATCGGTCGGTCGGTCAGT----- mirR 22 711
-----GTCGATCGGTCGGTCGGTCAGTC----- mirR 23 322
-----TCGATCGGTCGGTCGGTC----- mirR 18 314
-----CGATCGGTCGGTCGGTCAGT----- mirR 20 304
-----GTCGATCGGTCGGTCGGTCA----- mirR 20 183
-----GTCGATCGGTCGGTCGGTCAG----- mirR 21 180
-----CGATCGGTCGGTCGGTCAGTC----- mirR 21 105
-----GTCGATCGGTCGGTCGGTCAGTC----- mirR 24 73
-----CGATCGGTCGGTCGGTCAG----- mirR 19 67
-----CGATCGGTCGGTCGGTCAGTC----- mirR 22 61
-----CGATCGGTCGGTCGGTCA----- mirR 18 59
-----CGGTCGATCGGTCGGTCGGTCA----- mirR 22 58
-----GTCGATCGGTCGGTCGGTC----- mirR 19 55
-----TCGATCGGTCGGTCGGTCAGTCGG----- mirR 24 50
-----CGGTCGATCGGTCGGTCGGTC----- mirR 21 39
-----CGGTCGATCGGTCGGTCGGT----- mirR 20 24
-----GTCGATCGGTCGGTCGGT----- mirR 18 10
-----GGTCGATCGGTCGGTCGGT----- mirR 19 9
-----CGGTCGATCGGTCGGTCG----- mirR 18 5
-----ATCGGTCGGTCGGTCAGT----- mirR 18 4
-----CGGTCGATCGGTCGGTCGG----- mirR 19 3
-----CGGTCGATCGGTCGGTCGGTCAG----- mirR 23 3
-----GATCGGTCGGTCGGTCAGTC----- mirR 20 3
-----CGATCGGTCGGTCGGTCAGTCGG----- mirR 23 2
-----GATCGGTCGGTCGGTCAGT----- mirR 19 2
-----GGTCGATCGGTCGGTCGGTCAGT----- mirR 23 2
-----GGTCGATCGGTCGGTCGGTC----- mirR 20 2
-----GATCGGTCGGTCGGTCAGTCG----- mirR 21 2
-----GGTCGATCGGTCGGTCGG----- mirR 18 2
-----CGGTCGATCGGTCGGTCGGTCAGT----- mirR 24 1
-----CGATCGGTCGGTCGGTCAGTCGGC----- mirR 24 1
-----ATCGGTCGGTCGGTCAGTC----- mirR 19 1
-----GGCTTCCTGTCTTCGAACTG----- morR 20 3
-----CTTCCTGTCTTCGAACTG----- morR 18 1
-----GGCTTCCTGTCTTCGAACTGC----- morR 21 1
-----GCTTCCTGTCTTCGAACT----- morR 18 1

```

>mmu-mir-350

```

TAAAGTGCATGCGCTTTGGGACAGTGAGGAAAATAATGTTTCACAAAGCCATACACTTTACCCTTTAGGAGAGTTGCAG species len reads
-AAAGTGCATGCGCTTTGGGA----- mirL 20 15
-AAAGTGCATGCGCTTTGGGACAG----- mirL 23 11
-AAAGTGCATGCGCTTTGGGAC----- mirL 21 9
-AAAGTGCATGCGCTTTGGGACA----- mirL 22 7
-AAAGTGCATGCGCTTTGG----- mirL 18 2
-AAAGTGCATGCGCTTTGGGACAGT----- mirL 24 1

```

```

TAAAGTGCATGCGCTTTG----- mirL 18 1
-----GACAGTGAGGAAAATAATG----- loop 19 1
-----TTCACAAAGCCCATACACTTTTCA----- mirR 23 7946
-----TTCACAAAGCCCATACACTTTTC----- mirR 22 5591
-----TTCACAAAGCCCATACACTTTTTCAC----- mirR 24 2731
-----TTCACAAAGCCCATACACTTTT----- mirR 21 1818
-----TTCACAAAGCCCATACACTTTTACC----- mirR 25 1098
-----TCACAAAGCCCATACACTTTTCA----- mirR 22 834
-----TCACAAAGCCCATACACTTTTC----- mirR 21 567
-----TTCACAAAGCCCATACAC----- mirR 18 428
-----TTCACAAAGCCCATACACTT----- mirR 20 419
-----TCACAAAGCCCATACACTTTTTCAC----- mirR 23 311
-----TCACAAAGCCCATACACTTTT----- mirR 20 160
-----ACAAAGCCCATACACTTTTCA----- mirR 20 86
-----CACAAAGCCCATACACTTTTCA----- mirR 21 74
-----CACAAAGCCCATACACTTTTTC----- mirR 20 64
-----ACAAAGCCCATACACTTTTTC----- mirR 19 50
-----ACAAAGCCCATACACTTTT----- mirR 18 40
-----TCACAAAGCCCATACACTT----- mirR 19 39
-----CACAAAGCCCATACACTTTTTCAC----- mirR 22 36
-----TCACAAAGCCCATACACTTTTACC----- mirR 24 31
-----ACAAAGCCCATACACTTTTACC----- mirR 22 24
-----CACAAAGCCCATACACTTTT----- mirR 19 22
-----ACAAAGCCCATACACTTTTTCAC----- mirR 21 21
-----TCACAAAGCCCATACACT----- mirR 18 16
-----CACAAAGCCCATACACTT----- mirR 18 10
-----ACAAAGCCCATACACTTTTACCC----- mirR 23 10
-----GTTTCACAAAGCCCATACACTTTTCA----- mirR 24 8
-----CACAAAGCCCATACACTTTTACCC----- mirR 24 3
-----CACAAAGCCCATACACTTTTACC----- mirR 23 2
-----ACAAAGCCCATACACTTTTACCCT----- mirR 24 1
-----GTTTCACAAAGCCCATACACT----- mirR 20 1
-----GTTTCACAAAGCCCATACACTTT----- mirR 22 1
-----ATGTTTCACAAAGCCCATA----- mirR 18 1
-----CCCTTTAGGAGAGTTGCAG morR 19 1

```

>mmu-mir-676

```

CACTACTTTGCCTGAATGCATGACTCTACAACCTTAGGACTTGCCAGAATTAAGGAATGCCGTCTGAGGTTGTTGAGCTGTGCGTTTTCTGGGCCTTTCAT species len reads
CACTACTTTGCCTGAATGCA----- morL 20 1
---TACTTTGCCTGAATGCAT----- morL 18 1
-----ACTCTACAACCTTAGGACTTGC----- mirL 22 4288
-----ACTCTACAACCTTAGGACTTG----- mirL 21 1696
-----ACTCTACAACCTTAGGACTTGCA----- mirL 23 619
-----ACTCTACAACCTTAGGACTT----- mirL 20 433
-----CTCTACAACCTTAGGACTTGC----- mirL 21 124
-----ACTCTACAACCTTAGGACT----- mirL 19 105

```

```

-----ACTCTACAACCTTAGGAC----- mirL 18 94
-----CTCTACAACCTTAGGACTTGCA----- mirL 22 79
-----ACTCTACAACCTTAGGACTTGCA----- mirL 24 59
-----CTCTACAACCTTAGGACTTG----- mirL 20 28
-----TCTACAACCTTAGGACTTG----- mirL 19 19
-----CTCTACAACCTTAGGACTT----- mirL 19 15
-----CTACAACCTTAGGACTTG----- mirL 18 12
-----CTACAACCTTAGGACTTGCA----- mirL 19 10
-----CTCTACAACCTTAGGACTTGCA----- mirL 23 10
-----GACTCTACAACCTTAGGACTTGCA----- mirL 23 7
-----TCTACAACCTTAGGACTTGCA----- mirL 20 5
-----CTCTACAACCTTAGGACTT----- mirL 18 4
-----TCTACAACCTTAGGACTT----- mirL 18 3
-----CTACAACCTTAGGACTTGCA----- mirL 20 2
-----GACTCTACAACCTTAGGACTTG----- mirL 22 1
-----GACTCTACAACCTTAGGACTT----- mirL 21 1
-----TCTACAACCTTAGGACTTGCA----- mirL 21 1
-----GACTCTACAACCTTAGGACTT----- mirL 19 1
-----TGACTCTACAACCTTAGGACTTG----- mirL 23 1
-----GACTCTACAACCTTAGGACTT----- mirL 20 1
-----CCGTCCTGAGGTTGTTGAGCTG----- mirR 22 4304
-----CCGTCCTGAGGTTGTTGAGCT----- mirR 21 3492
-----CCGTCCTGAGGTTGTTGAGC----- mirR 20 2277
-----CCGTCCTGAGGTTGTTGAG----- mirR 19 1890
-----CCGTCCTGAGGTTGTTGAGCTGT----- mirR 23 1701
-----CCGTCCTGAGGTTGTTGAGCTGTG----- mirR 24 378
-----CCGTCCTGAGGTTGTTGA----- mirR 18 281
-----CGTCCTGAGGTTGTTGAGCTG----- mirR 21 19
-----CGTCCTGAGGTTGTTGAGCTGT----- mirR 22 10
-----TCCTGAGGTTGTTGAGCT----- mirR 18 10
-----GTCCCTGAGGTTGTTGAGCTG----- mirR 20 8
-----CGTCCTGAGGTTGTTGAGCT----- mirR 20 7
-----GTCCCTGAGGTTGTTGAGCT----- mirR 19 7
-----CGTCCTGAGGTTGTTGAGC----- mirR 19 7
-----TCCTGAGGTTGTTGAGCTG----- mirR 19 5
-----CGTCCTGAGGTTGTTGAG----- mirR 18 5
-----GCCGTCCTGAGGTTGTTGAGCTG----- mirR 23 3
-----TGCCGTCCTGAGGTTGTTGA----- mirR 20 2
-----CGTCCTGAGGTTGTTGAGCTGTGC----- mirR 24 2
-----GCCGTCCTGAGGTTGTTGAGC----- mirR 21 2
-----GTCCCTGAGGTTGTTGAGC----- mirR 18 1
-----TGCCGTCCTGAGGTTGTTGAG----- mirR 21 1
-----TCCTGAGGTTGTTGAGCTGT----- mirR 20 1
-----GTCCCTGAGGTTGTTGAGCTGT----- mirR 21 1
-----GCCGTCCTGAGGTTGTTGAGCT----- mirR 22 1
-----GCCGTCCTGAGGTTGTTGA----- mirR 19 1

```

-----TGTGCGTTTCTGGGCCTT---- morR 18 2  
-----CGTTTCTGGGCCTTTCAT morR 18 1

>mmu-mir-210

| ACAGCCACTGCCCACCGCACACTGCGTTGCTCCGGACCCACTGTGCGTGTGACAGCGGCTGATCTGTCCCTGGGCAGCGGAACCC | species | len | reads |
|---------------------------------------------------------------------------------------|---------|-----|-------|
| --AGCCACTGCCCACCGCACACTGC-----                                                        | mirL    | 23  | 377   |
| --AGCCACTGCCCACCGCACACTG-----                                                         | mirL    | 22  | 205   |
| --AGCCACTGCCCACCGCACACT-----                                                          | mirL    | 21  | 97    |
| --AGCCACTGCCCACCGCACAC-----                                                           | mirL    | 20  | 73    |
| --AGCCACTGCCCACCGCACACTGCG-----                                                       | mirL    | 24  | 16    |
| --AGCCACTGCCCACCGCACAC-----                                                           | mirL    | 19  | 8     |
| --AGCCACTGCCCACCGCAC-----                                                             | mirL    | 18  | 7     |
| -CAGCCACTGCCCACCGCACACT-----                                                          | mirL    | 22  | 4     |
| ---GCCACTGCCCACCGCACACT-----                                                          | mirL    | 20  | 3     |
| ---GCCACTGCCCACCGCACACTGC-----                                                        | mirL    | 22  | 2     |
| ---GCCACTGCCCACCGCACACTG-----                                                         | mirL    | 21  | 2     |
| ACAGCCACTGCCCACCGCACACT-----                                                          | mirL    | 23  | 1     |
| ---CCACTGCCCACCGCACAC-----                                                            | mirL    | 18  | 1     |
| ---GCCACTGCCCACCGCACAC-----                                                           | mirL    | 18  | 1     |
| ACAGCCACTGCCCACCGCAC-----                                                             | mirL    | 20  | 1     |
| -CAGCCACTGCCCACCGCACACTG-----                                                         | mirL    | 23  | 1     |
| ---GCCACTGCCCACCGCACACTGCGTT-----                                                     | mirL    | 25  | 1     |
| ACAGCCACTGCCCACCGCACACTGC-----                                                        | mirL    | 25  | 1     |
| ACAGCCACTGCCCACCGCACAC-----                                                           | mirL    | 22  | 1     |
| ---CCACTGCCCACCGCACACTGC-----                                                         | mirL    | 21  | 1     |
| ---GCCACTGCCCACCGCACAC-----                                                           | mirL    | 19  | 1     |
| -----CTGTGCGTGTGACAGCGGCTGA-----                                                      | mirR    | 22  | 9960  |
| -----CTGTGCGTGTGACAGCGGCTGAT-----                                                     | mirR    | 23  | 3862  |
| -----CTGTGCGTGTGACAGCGGCTGATC-----                                                    | mirR    | 24  | 2782  |
| -----CTGTGCGTGTGACAGCGGC-----                                                         | mirR    | 19  | 1829  |
| -----CTGTGCGTGTGACAGCGGCT-----                                                        | mirR    | 20  | 691   |
| -----CTGTGCGTGTGACAGCGGCTG-----                                                       | mirR    | 21  | 676   |
| -----CTGTGCGTGTGACAGCGGCTGATCT-----                                                   | mirR    | 25  | 254   |
| -----ACTGTGCGTGTGACAGCGGCTGA-----                                                     | mirR    | 23  | 192   |
| -----TGCGTGTGACAGCGGCTGA-----                                                         | mirR    | 19  | 93    |
| -----GTGCGTGTGACAGCGGCTGA-----                                                        | mirR    | 20  | 83    |
| -----ACTGTGCGTGTGACAGCGGCTGAT-----                                                    | mirR    | 24  | 73    |
| -----ACTGTGCGTGTGACAGCGGC-----                                                        | mirR    | 20  | 58    |
| -----ACTGTGCGTGTGACAGCGGCTG-----                                                      | mirR    | 22  | 47    |
| -----ACTGTGCGTGTGACAGCGGCTGATC-----                                                   | mirR    | 25  | 42    |
| -----ACTGTGCGTGTGACAGCGGCT-----                                                       | mirR    | 21  | 36    |
| -----TGTGCGTGTGACAGCGGCTGA-----                                                       | mirR    | 21  | 31    |
| -----GTGCGTGTGACAGCGGCTG-----                                                         | mirR    | 19  | 29    |
| -----TGCGTGTGACAGCGGCTG-----                                                          | mirR    | 18  | 20    |
| -----ACTGTGCGTGTGACAGCG-----                                                          | mirR    | 18  | 16    |
| -----TGTGCGTGTGACAGCGGCTG-----                                                        | mirR    | 20  | 11    |

```

-----GTGCGTGTGACAGCGGCTGAT----- mirR 21 10
-----GTGCGTGTGACAGCGGCT----- mirR 18 9
-----TGTGCGTGTGACAGCGGCTGATC----- mirR 23 6
-----TGTGCGTGTGACAGCGGCT----- mirR 19 6
-----TGTGCGTGTGACAGCGGC----- mirR 18 6
-----TGTGCGTGTGACAGCGGCTGAT----- mirR 22 4
-----TGCCTGTGACAGCGGCTGAT----- mirR 20 4
-----CACTGTGCGTGTGACAGC----- mirR 18 2
-----GTGCGTGTGACAGCGGCTGATCTG----- mirR 24 1
-----GTGCGTGTGACAGCGGCTGATC----- mirR 22 1
-----TGTGCGTGTGACAGCGGCTGATCT----- mirR 24 1
-----GTCCCTGGGCAGCGCGAAC-- morR 19 4
-----GTCCCTGGGCAGCGCGAACCC morR 21 1
-----TCTGTCCCTGGGCAGCGC----- morR 18 1

```

>mmu-mir-186

| Sequence                                                                     | species | len  | reads |
|------------------------------------------------------------------------------|---------|------|-------|
| TCCAAAGAATTCTCCTTTTGGGCTTCTCATTATTTAAGCCCTAAGGTGAATTTTTGGGAAGTTGAGCTAAATGCCT | mirL 22 | 7485 |       |
| --CAAAGAATTCTCCTTTTGGGCT-----                                                | mirL 23 | 5060 |       |
| --CAAAGAATTCTCCTTTTGGGCTT-----                                               | mirL 21 | 3083 |       |
| --CAAAGAATTCTCCTTTTGGGC-----                                                 | mirL 23 | 676  |       |
| -CCAAAGAATTCTCCTTTTGGGCT-----                                                | mirL 19 | 627  |       |
| --CAAAGAATTCTCCTTTTGG--                                                      | mirL 24 | 518  |       |
| --CAAAGAATTCTCCTTTTGGCTTT-----                                               | mirL 18 | 469  |       |
| --CAAAGAATTCTCCTTTTGGCCTTT-----                                              | mirL 25 | 433  |       |
| -CCAAAGAATTCTCCTTTTGGGC-----                                                 | mirL 22 | 170  |       |
| -CCAAAGAATTCTCCTTTTGGGCTT-----                                               | mirL 24 | 144  |       |
| ---AAAGAATTCTCCTTTTGGGCTT-----                                               | mirL 22 | 81   |       |
| ---AGAATTCTCCTTTTGGGCT-----                                                  | mirL 19 | 46   |       |
| ---AAAGAATTCTCCTTTTGGGCT-----                                                | mirL 21 | 33   |       |
| -CCAAAGAATTCTCCTTTTGGG-----                                                  | mirL 21 | 24   |       |
| ---AAAGAATTCTCCTTTTGGGC-----                                                 | mirL 20 | 23   |       |
| -CCAAAGAATTCTCCTTTTG-----                                                    | mirL 19 | 22   |       |
| -CCAAAGAATTCTCCTTTTGG-----                                                   | mirL 20 | 20   |       |
| ---AGAATTCTCCTTTTGGGCTT-----                                                 | mirL 20 | 17   |       |
| -CCAAAGAATTCTCCTTTTGGGCTTT-----                                              | mirL 25 | 16   |       |
| ---AAGAATTCTCCTTTTGGGCTT-----                                                | mirL 21 | 14   |       |
| ---AAAGAATTCTCCTTTTGGGCTTT-----                                              | mirL 23 | 12   |       |
| ---AAAGAATTCTCCTTTTGGGCTTTC-----                                             | mirL 24 | 11   |       |
| ---AAGAATTCTCCTTTTGGGCT-----                                                 | mirL 20 | 9    |       |
| ---AGAATTCTCCTTTTGGGCTTT-----                                                | mirL 21 | 6    |       |
| ---AAAGAATTCTCCTTTTGGGCTTTCT-----                                            | mirL 25 | 3    |       |
| ---AAAGAATTCTCCTTTTGG-----                                                   | mirL 18 | 3    |       |
| ---AAGAATTCTCCTTTTGGGC-----                                                  | mirL 19 | 2    |       |
| ---AGAATTCTCCTTTTGGGC-----                                                   | mirL 18 | 2    |       |
| TCCAAAGAATTCTCCTTTTGGGCT-----                                                | mirL 24 | 2    |       |

```

---AAGAATTCTCCTTTTGGG----- mirL 18 1
---AAGAATTCTCCTTTTGGGCTTTC----- mirL 23 1
-----CTTTCTCATTTTATTTTA----- loop 18 1
-----GCTTTCTCATTTTATTTT----- loop 18 1
-----GCCCTAAGGTGAATTTTTTGGGA----- mirR 23 618
-----GCCCTAAGGTGAATTTTTTGGGAA----- mirR 24 227
-----GCCCTAAGGTGAATTTTTTGGG----- mirR 22 222
-----GCCCTAAGGTGAATTTTTTGGGAAG----- mirR 25 192
-----CCCTAAGGTGAATTTTTTGGGA----- mirR 22 190
-----CCCTAAGGTGAATTTTTTGGGAA----- mirR 23 176
-----GCCCTAAGGTGAATTTTTTGG----- mirR 21 109
-----CCCTAAGGTGAATTTTTTGGGAAG----- mirR 24 96
-----GCCCTAAGGTGAATTTTTT----- mirR 18 72
-----GCCCTAAGGTGAATTTTTTG----- mirR 20 57
-----CCTAAGGTGAATTTTTTGGGAA----- mirR 22 52
-----CCCTAAGGTGAATTTTTTGGG----- mirR 21 37
-----CCTAAGGTGAATTTTTTGGGAAG----- mirR 23 35
-----CCCTAAGGTGAATTTTTT----- mirR 18 28
-----CCCTAAGGTGAATTTTTTGG----- mirR 20 26
-----CCTAAGGTGAATTTTTTGGGA----- mirR 21 17
-----CCTAAGGTGAATTTTTTGGG----- mirR 20 13
-----CCCTAAGGTGAATTTTTTG----- mirR 19 8
-----CCTAAGGTGAATTTTTTGG----- mirR 19 5
-----CTAAGGTGAATTTTTTGGGAAG----- mirR 22 3
-----CTAAGGTGAATTTTTTGGG----- mirR 19 3
-----AGCCCTAAGGTGAATTTTTTGGG----- mirR 23 2
-----AGCCCTAAGGTGAATTTTT----- mirR 18 2
-----CCTAAGGTGAATTTTTTGGGAAGT----- mirR 24 2
-----AGCCCTAAGGTGAATTTTTTGG----- mirR 22 1
-----CCTAAGGTGAATTTTTTG----- mirR 18 1
-----AAGCCCTAAGGTGAATTTTT----- mirR 19 1
-----CTAAGGTGAATTTTTTGG----- mirR 18 1
-----GAAGTTTGAGCTAAATGC----- morR 18 1
-----AAGTTTGAGCTAAATGCCT morR 19 1

>mmu-mir-381
GCTATTGTTTGGTACTTAAAGCGAGTTGCCCTTTGTATATTCGGTTTATTGACATGGAATATACAAGGGCAAGCTCTCTGTGAGTATCAAACCTTATCTT species len reads
GCTATTGTTTGGTACTTAA----- morL 19 3
-CTATTGTTTGGTACTTAA----- morL 18 2
--TATTGTTTGGTACTTAAAG----- morL 19 1
-----AGCGAGTTGCCCTTTGTATAT----- mirL 22 1087
-----AGCGAGTTGCCCTTTGTATATT----- mirL 23 360
-----AGCGAGTTGCCCTTTGTAT----- mirL 20 325
-----AGCGAGTTGCCCTTTGTATATTC----- mirL 24 292
-----AGCGAGTTGCCCTTTGTATA----- mirL 21 162
-----AGCGAGTTGCCCTTTGT----- mirL 18 60

```



```

-----AGCGAGGTTGCCCTTTGTA----- mirL 19 54
-----CGAGGTTGCCCTTTGTATATTC----- mirL 22 24
-----CGAGGTTGCCCTTTGTATATT----- mirL 21 14
-----CGAGGTTGCCCTTTGTATAT----- mirL 20 11
-----CGAGGTTGCCCTTTGTATATTCG----- mirL 23 8
-----AAGCGAGGTTGCCCTTTGTATAT----- mirL 23 6
-----CGAGGTTGCCCTTTGTATA----- mirL 19 5
-----GAGGTTGCCCTTTGTATAT----- mirL 19 4
-----CGAGGTTGCCCTTTGTAT----- mirL 18 4
-----GCGAGGTTGCCCTTTGTAT----- mirL 19 2
-----GCGAGGTTGCCCTTTGTATAT----- mirL 21 2
-----GAGGTTGCCCTTTGTATA----- mirL 18 2
-----AAGCGAGGTTGCCCTTTGTAT----- mirL 21 2
-----GAGGTTGCCCTTTGTATATT----- mirL 20 1
-----AAGCGAGGTTGCCCTTTGTATATT----- mirL 24 1
-----GCGAGGTTGCCCTTTGTATATT----- mirL 22 1
-----GAGGTTGCCCTTTGTATATTC----- mirL 21 1
-----GCGAGGTTGCCCTTTGTATATTC----- mirL 23 1
-----TTCGGTTTATTGACATGG----- loop 18 1
-----CGGTTTATTGACATGGAA----- loop 18 1
-----TATACAAGGGCAAGCTCTCTGT----- mirR 22 13366
-----TATACAAGGGCAAGCTCTCTGT----- mirR 21 1370
-----ATACAAGGGCAAGCTCTCTGT----- mirR 21 910
-----TATACAAGGGCAAGCTCTCT----- mirR 19 755
-----TATACAAGGGCAAGCTCTCTGTG----- mirR 23 720
-----TATACAAGGGCAAGCTCTCTGTGA----- mirR 24 351
-----TATACAAGGGCAAGCTCTCT----- mirR 20 270
-----ATATACAAGGGCAAGCTCTCTGT----- mirR 23 187
-----TATACAAGGGCAAGCTCT----- mirR 18 151
-----ATACAAGGGCAAGCTCTCTG----- mirR 20 81
-----ATACAAGGGCAAGCTCTC----- mirR 18 70
-----ATATACAAGGGCAAGCTCTCTG----- mirR 22 66
-----ATACAAGGGCAAGCTCTCTGTG----- mirR 22 56
-----ACAAGGGCAAGCTCTCTGT----- mirR 19 45
-----ATATACAAGGGCAAGCTCTCT----- mirR 21 44
-----ATATACAAGGGCAAGCTCTC----- mirR 20 29
-----ATACAAGGGCAAGCTCTCTGTGA----- mirR 23 27
-----ATACAAGGGCAAGCTCTCT----- mirR 19 21
-----TACAAGGGCAAGCTCTCTGT----- mirR 20 21
-----ATATACAAGGGCAAGCTCTCTGTG----- mirR 24 15
-----ATATACAAGGGCAAGCTCT----- mirR 19 10
-----ATATACAAGGGCAAGCTCTCTGTGA----- mirR 25 9
-----TACAAGGGCAAGCTCTCTGTGA----- mirR 22 9
-----ATACAAGGGCAAGCTCTCTGTGAG----- mirR 24 8
-----ACAAGGGCAAGCTCTCTG----- mirR 18 7
-----TACAAGGGCAAGCTCTCTG----- mirR 19 4

```

```

-----TACAAGGGCAAGCTCTCT----- mirR 18 4
-----TACAAGGGCAAGCTCTCTGTGAG----- mirR 23 2
-----AATATACAAGGGCAAGCTCTCTGT----- mirR 24 2
-----ACAAGGGCAAGCTCTCTGTG----- mirR 20 2
-----GAATATACAAGGGCAAGCTCTCT----- mirR 22 1
-----AATATACAAGGGCAAGCTCTCT----- mirR 22 1
-----AATATACAAGGGCAAGCT----- mirR 18 1
-----TGAGTATCAAACCTTATCT----- morR 19 1
-----GTGAGTATCAAACCTTATC----- morR 19 1
-----TGAGTATCAAACCTTATCTT morR 20 1

```

>mmu-mir-370

```

GGGGCCTAAGACGGAGAGACCAGGTCACGTCTCTGCAGTTACACAGCTCATGAGTGCCTGCTGGGGTGGAACTGGTTTGTCTGTCTGTCTGTCCACCAT species len reads
GGGGCCTAAGACGGAGAGA----- morL 19 2
-----AGACCAGGTCACGTCTCTGCAG----- mirL 22 2236
-----AGACCAGGTCACGTCTCTGCAG----- mirL 21 875
-----AGACCAGGTCACGTCTCTGCAGT----- mirL 23 676
-----AGACCAGGTCACGTCTCTGC----- mirL 20 641
-----CCAGGTCACGTCTCTGCAGTT----- mirL 21 253
-----AGACCAGGTCACGTCTCTGCAGTT----- mirL 24 186
-----CCAGGTCACGTCTCTGCAGTTAC----- mirL 23 121
-----CCAGGTCACGTCTCTGCAGTTA----- mirL 22 118
-----AGACCAGGTCACGTCTCT----- mirL 18 70
-----AGACCAGGTCACGTCTCTG----- mirL 19 67
-----CCAGGTCACGTCTCTGCAGT----- mirL 20 20
-----CCAGGTCACGTCTCTGCAGTTACA----- mirL 24 15
-----CCAGGTCACGTCTCTGCAG----- mirL 19 14
-----CCAGGTCACGTCTCTGCAGTTACAC----- mirL 25 13
-----GACCAGGTCACGTCTCTGCAG----- mirL 21 4
-----GAGACCAGGTCACGTCTCTGCA----- mirL 22 2
-----GACCAGGTCACGTCTCTGC----- mirL 19 2
-----GAGACCAGGTCACGTCTCTGCAG----- mirL 23 2
-----ACCAGGTCACGTCTCTGCAG----- mirL 20 1
-----GAGACCAGGTCACGTCTC----- mirL 18 1
-----ACCAGGTCACGTCTCTGCA----- mirL 19 1
-----GAGACCAGGTCACGTCTCTGC----- mirL 21 1
-----GACCAGGTCACGTCTCTGCAGT----- mirL 22 1
-----AGTTACACAGCTCATGAGT----- loop 19 1
-----TTACACAGCTCATGAGTGCC----- loop 20 1
-----GCCTGCTGGGGTGGAACTGGT----- mirR 22 4405
-----GCCTGCTGGGGTGGAACTGGTT----- mirR 23 3298
-----GCCTGCTGGGGTGGAACTGG----- mirR 21 1999
-----GCCTGCTGGGGTGGAACTGGTTT----- mirR 24 1372
-----GCCTGCTGGGGTGGAACTG----- mirR 20 972
-----GCCTGCTGGGGTGGAACT----- mirR 19 799
-----GCCTGCTGGGGTGGAACTGGTTG----- mirR 25 709

```

```

-----CCTGCTGGGGTGGAACTGGTT----- mirR 22 313
-----TGCCCTGCTGGGGTGGAACTGG----- mirR 22 248
-----CCTGCTGGGGTGGAACTGGTTT----- mirR 23 204
-----CTGCTGGGGTGGAACTGGTT----- mirR 21 165
-----CTGCTGGGGTGGAACTGGTTT----- mirR 22 135
-----TGCCCTGCTGGGGTGGAACTGG----- mirR 21 116
-----CCTGCTGGGGTGGAACTGGT----- mirR 21 102
-----TGCCCTGCTGGGGTGGAACTG----- mirR 20 94
-----TGCCCTGCTGGGGTGGAACTGGT----- mirR 23 89
-----TGCCCTGCTGGGGTGGAACTG----- mirR 19 72
-----TGCCCTGCTGGGGTGGAACTGGTT----- mirR 24 54
-----CTGCTGGGGTGGAACTGGT----- mirR 20 52
-----CCTGCTGGGGTGGAACTGG----- mirR 20 52
-----TGCCCTGCTGGGGTGGAACTGGTTT----- mirR 25 49
-----CCTGCTGGGGTGGAACTGGTTTG----- mirR 24 49
-----CCTGCTGGGGTGGAACTG----- mirR 19 49
-----CTGCTGGGGTGGAACTGGTTTG----- mirR 23 32
-----CTGCTGGGGTGGAACTGG----- mirR 19 29
-----CCTGCTGGGGTGGAACTG----- mirR 18 23
-----CTGCTGGGGTGGAACTG----- mirR 18 21
-----TGCTGGGGTGGAACTGG----- mirR 18 15
-----TGCTGGGGTGGAACTGGT----- mirR 19 14
-----TGCTGGGGTGGAACTGGTT----- mirR 20 9
-----AGTGCCTGCTGGGGTGGAA----- mirR 18 8
-----AGTGCCTGCTGGGGTGGAACTG----- mirR 23 2
-----TGCTGGGGTGGAACTGGTTT----- mirR 21 2
-----AGTGCCTGCTGGGGTGGAACTG----- mirR 20 1
-----AGTGCCTGCTGGGGTGGAA----- mirR 19 1
-----CTGCTGGGGTGGAACTGGTTTGT----- mirR 24 1
-----TGCTGGGGTGGAACTGGTTTG----- mirR 22 1
-----TGCTGTCTGTCTGTCAC--- morR 18 6
-----TGCTGTCTGTCTGTCACCA- morR 20 4
-----TCTGTCTGTCTGTCACCA- morR 18 2
-----TTGTCTGTCTGTCTGTCACCA- morR 21 2
-----GTTGTCTGTCTGTCTGTC----- morR 19 2
-----TGCTGTCTGTCTGTCACC-- morR 19 1
-----TTTGTCTGTCTGTCTGTCAC--- morR 19 1
-----GTCTGTCTGTCTGTCACC-- morR 18 1
-----TCTGTCTGTCTGTCACCAT morR 19 1
-----TTGTCTGTCTGTCTGTCAC--- morR 19 1
-----TTGTCTGTCTGTCTGTCAC--- morR 18 1
-----TTTGTCTGTCTGTCTGTC----- morR 18 1
-----GTCTGTCTGTCTGTCACCA- morR 19 1

```

>mmu-mir-764

TCTGAATCTTGGAGGCAGGTGCTCACATGTCCTCCTCCATGCTTATAAATACATGGAGGAGGCCATAGTGGCAACTGTCACCATGATTGATTTCGTTGG species len reads

```

TCTGAATCTTGGAGGCAG----- morL 18 1
-----GGTGCTCACATGTCCTCCT----- mirL 19 6850
-----GGTGCTCACATGTCCTCCTCCA----- mirL 22 3861
-----GGTGCTCACATGTCCTCCTCCAT----- mirL 23 1248
-----GGTGCTCACATGTCCTCCTC----- mirL 20 830
-----GGTGCTCACATGTCCTC----- mirL 18 650
-----GGTGCTCACATGTCCTCCTC----- mirL 21 440
-----GGTGCTCACATGTCCTCCTCCATG----- mirL 24 160
-----GTGCTCACATGTCCTCCT----- mirL 18 50
-----GCAGGTGCTCACATGTCCTCCT----- mirL 22 45
-----GCAGGTGCTCACATGTCCTCCTC----- mirL 23 14
-----AGGTGCTCACATGTCCTCCT----- mirL 20 13
-----GCAGGTGCTCACATGTCCTC----- mirL 21 10
-----AGGTGCTCACATGTCCTCCTC----- mirL 22 9
-----GTGCTCACATGTCCTCCTCCA----- mirL 21 8
-----GCAGGTGCTCACATGTCCTC----- mirL 20 8
-----GCAGGTGCTCACATGTCCT----- mirL 19 7
-----GCAGGTGCTCACATGTCC----- mirL 18 6
-----AGGTGCTCACATGTCCTCCTC----- mirL 21 5
-----GCTCACATGTCCTCCTCCA----- mirL 19 5
-----GTGCTCACATGTCCTCCTC----- mirL 19 4
-----TGCTCACATGTCCTCCTC----- mirL 18 3
-----AGGTGCTCACATGTCCTCCTCCAT----- mirL 24 3
-----AGGTGCTCACATGTCCTC----- mirL 19 3
-----TGCTCACATGTCCTCCTCCA----- mirL 20 2
-----GCTCACATGTCCTCCTCCATGCTT----- mirL 24 2
-----CAGGTGCTCACATGTCCTC----- mirL 19 2
-----TGCTCACATGTCCTCCTCCAT----- mirL 21 2
-----GTGCTCACATGTCCTCCTC----- mirL 20 1
-----AGGTGCTCACATGTCCTC----- mirL 18 1
-----CAGGTGCTCACATGTCCTCCT----- mirL 21 1
-----TGCTCACATGTCCTCCTC----- mirL 19 1
-----GCTCACATGTCCTCCTCCAT----- mirL 20 1
-----ATGCTTATAAATACATGG----- loop 18 1
-----TGCTTATAAATACATGGA----- loop 18 1
-----AGGAGGCCATAGTGGCAACTGT----- mirR 22 3538
-----GAGGAGGCCATAGTGGCAACTGT----- mirR 23 1265
-----GAGGAGGCCATAGTGGCAACTGTC----- mirR 24 622
-----AGGAGGCCATAGTGGCAACTG----- mirR 21 197
-----GAGGAGGCCATAGTGGCAACTG----- mirR 22 121
-----AGGAGGCCATAGTGGCAACTGTC----- mirR 23 108
-----GGAGGCCATAGTGGCAACTGT----- mirR 21 85
-----GAGGCCATAGTGGCAACTGT----- mirR 20 68
-----AGGCCATAGTGGCAACTGT----- mirR 19 65
-----GAGGAGGCCATAGTGGCAAC----- mirR 20 56
-----AGGAGGCCATAGTGGCAACT----- mirR 20 49

```

```

-----GAGGAGGCCATAGTGGCAACT----- mirR 21 39
-----AGGAGGCCATAGTGGCAAC----- mirR 19 22
-----AGGAGGCCATAGTGGCAACTGTCACCATGAT----- mirR 31 21
-----AGGCCATAGTGGCAACTG----- mirR 18 18
-----GAGGAGGCCATAGTGGCAACTGTCA----- mirR 25 18
-----GGAGGCCATAGTGGCAACTG----- mirR 20 12
-----AGGAGGCCATAGTGGCAACTGTCACCA----- mirR 27 11
-----GAGGCCATAGTGGCAACTG----- mirR 19 10
-----TGGAGGAGGCCATAGTGGCAAC----- mirR 22 6
-----GAGGAGGCCATAGTGGCAACTGTCACCATGAT----- mirR 32 5
-----GGAGGCCATAGTGGCAACT----- mirR 19 5
-----TGGAGGAGGCCATAGTGGCAACTGT----- mirR 25 4
-----GGAGGAGGCCATAGTGGCAACTGT----- mirR 24 3
-----GGAGGCCATAGTGGCAACTGTC----- mirR 22 3
-----GAGGCCATAGTGGCAACT----- mirR 18 3
-----TGGAGGAGGCCATAGTGGCAACTG----- mirR 24 3
-----GAGGCCATAGTGGCAACTGTC----- mirR 21 1
-----TGGAGGAGGCCATAGTGGCAACTGTC----- mirR 26 1
-----GGAGGCCATAGTGGCAAC----- mirR 18 1
-----GGAGGAGGCCATAGTGGCAACTGTC----- mirR 25 1
-----AGGCCATAGTGGCAACTGTC----- mirR 20 1
-----GGAGGAGGCCATAGTGGCAAC----- mirR 21 1
-----TGGAGGAGGCCATAGTGGCA----- mirR 20 1
-----TGTCACCATGATTGATTTC----- morR 19 1
-----CATGATTGATTTCGTTGG----- morR 18 1

```

>mmu-mir-485

```

CCAGTGATCATGTGTGATACTTGGAGAGAGGCTGGCCGTGATGAATTCGATTCATCTAAACGAGTCATACACGGCTCTCCTCTCTTCTAGTGTCAAACCTCGCCTCAGAG species len reads
-----CATGTGTGATACTTGGAG----- morL 18 39
-----TCATGTGTGATACTTGGAG----- morL 19 35
-----TCATGTGTGATACTTGGAGA----- morL 20 7
-----GATCATGTGTGATACTTGGAG----- morL 21 6
-----ATCATGTGTGATACTTGGAG----- morL 20 5
-----CATGTGTGATACTTGGAGA----- morL 19 5
-----CATGTGTGATACTTGGAGAG----- morL 20 3
-----GATCATGTGTGATACTTG----- morL 18 2
-----GATCATGTGTGATACTTGG----- morL 19 2
-----TGATCATGTGTGATACTTGG----- morL 21 1
-----TGATCATGTGTGATACTTGGAG----- morL 22 1
CCAGTGATCATGTGTGATACTTGG----- morL 24 1
-----TCATGTGTGATACTTGG----- morL 18 1
-----GTGTGATACTTGGAGAGA----- morL 18 1
-----TCATGTGTGATACTTGGAGAG----- morL 21 1
-----AGAGGCTGGCCGTGATGAATTC----- mirL 22 2514
-----AGAGGCTGGCCGTGATGAATT----- mirL 21 1008
-----AGAGGCTGGCCGTGATGAATTC----- mirL 23 705

```

```

-----AGAGGCTGGCCGTGATGAAT----- mirL 20 524
-----AGAGGCTGGCCGTGATGAA----- mirL 19 324
-----AGAGGCTGGCCGTGATGA----- mirL 18 196
-----AGAGGCTGGCCGTGATGAATTCGA----- mirL 24 178
-----AGGCTGGCCGTGATGAATTCGA----- mirL 22 81
-----AGGCTGGCCGTGATGAATTC----- mirL 20 48
-----AGAGAGGCTGGCCGTGATGAAT----- mirL 22 43
-----AGGCTGGCCGTGATGAATTCG----- mirL 21 36
-----AGAGAGGCTGGCCGTGATGA----- mirL 20 36
-----AGAGAGGCTGGCCGTGATGAA----- mirL 21 34
-----GAGGCTGGCCGTGATGAATTC----- mirL 21 29
-----AGGCTGGCCGTGATGAATTC----- mirL 19 19
-----AGGCTGGCCGTGATGAATTCGAT----- mirL 23 15
-----AGGCTGGCCGTGATGAATTCGATTC----- mirL 25 13
-----GAGGCTGGCCGTGATGAATTC----- mirL 20 13
-----AGGCTGGCCGTGATGAATTCGATT----- mirL 24 9
-----GAGGCTGGCCGTGATGAATTC----- mirL 19 7
-----AGAGAGGCTGGCCGTGATGAATTC----- mirL 23 7
-----GGCTGGCCGTGATGAATTC----- mirL 19 6
-----GAGGCTGGCCGTGATGAATTCG----- mirL 22 6
-----AGAGAGGCTGGCCGTGATGAATTC----- mirL 24 5
-----AGAGAGGCTGGCCGTGATG----- mirL 19 5
-----AGAGAGGCTGGCCGTGAT----- mirL 18 3
-----GAGAGGCTGGCCGTGATGAATTC----- mirL 23 3
-----GAGAGGCTGGCCGTGATGAATTC----- mirL 22 2
-----GAGGCTGGCCGTGATGAATTCGAT----- mirL 24 2
-----GAGGCTGGCCGTGATGAATTCGA----- mirL 23 2
-----GGCTGGCCGTGATGAATTCGATT----- mirL 24 1
-----GAGAGAGGCTGGCCGTGA----- mirL 18 1
-----GAGAGGCTGGCCGTGATG----- mirL 18 1
-----GGCTGGCCGTGATGAATTCG----- mirL 20 1
-----GGCTGGCCGTGATGAATTC----- mirL 18 1
-----TTCGATTCATCTAAACGAGTC----- loop 21 9
-----TCGATTCATCTAAACGAGTC----- loop 20 9
-----TCGATTCATCTAAACGAGTCA----- loop 21 5
-----TCGATTCATCTAAACGAGTCAT----- loop 22 4
-----CGATTCATCTAAACGAGTC----- loop 19 3
-----ATTCATCTAAACGAGTCAT----- loop 19 2
-----TTCGATTCATCTAAACGA----- loop 18 1
-----TCGATTCATCTAAACGAG----- loop 18 1
-----TTCGATTCATCTAAACGAG----- loop 19 1
-----CATACACGGCTCTCCTCTCTTC----- mirR 22 7314
-----GTCATACACGGCTCTCCTCTCT----- mirR 22 1434
-----CATACACGGCTCTCCTCTCTT----- mirR 21 742
-----CATACACGGCTCTCCTCTTTCT----- mirR 23 683
-----GTCATACACGGCTCTCCTCT----- mirR 20 567

```

```

-----CATACACGGCTCTCCTCTC----- mirR 19 563
-----AGTCATACACGGCTCTCCTCTC----- mirR 22 437
-----GTCATACACGGCTCTCCTCTC----- mirR 21 430
-----AGTCATACACGGCTCTCCTCTCT----- mirR 23 298
-----GTCATACACGGCTCTCCTC----- mirR 19 238
-----GTCATACACGGCTCTCCTCTCTT----- mirR 23 226
-----TCATACACGGCTCTCCTCTCTTC----- mirR 23 179
-----CATACACGGCTCTCCTCTCT----- mirR 20 152
-----CATACACGGCTCTCCTCT----- mirR 18 138
-----GTCATACACGGCTCTCCTCTTTC----- mirR 24 127
-----CATACACGGCTCTCCTCTCTTCTA----- mirR 24 92
-----ATACACGGCTCTCCTCTCTTC----- mirR 21 86
-----AGTCATACACGGCTCTCCTCT----- mirR 21 75
-----GTCATACACGGCTCTCCT----- mirR 18 65
-----AGTCATACACGGCTCTCCTCTCTT----- mirR 24 51
-----AGTCATACACGGCTCTCC----- mirR 18 50
-----ATACACGGCTCTCCTCTCTTCT----- mirR 22 39
-----AGTCATACACGGCTCTCCTC----- mirR 20 36
-----ATACACGGCTCTCCTCTC----- mirR 18 29
-----AGTCATACACGGCTCTCCT----- mirR 19 26
-----TCATACACGGCTCTCCTCTC----- mirR 20 24
-----TCATACACGGCTCTCCTCTCTT----- mirR 22 20
-----TCATACACGGCTCTCCTC----- mirR 18 20
-----TCATACACGGCTCTCCTCTCT----- mirR 21 17
-----TCATACACGGCTCTCCTCTCTTCT----- mirR 24 12
-----ATACACGGCTCTCCTCTCT----- mirR 19 10
-----ATACACGGCTCTCCTCTCTT----- mirR 20 9
-----ATACACGGCTCTCCTCTCTTCTA----- mirR 23 8
-----TCATACACGGCTCTCCTCT----- mirR 19 8
-----TACACGGCTCTCCTCTCT----- mirR 18 6
-----TACACGGCTCTCCTCTCTTC----- mirR 20 4
-----TACACGGCTCTCCTCTCTT----- mirR 19 2
-----TACACGGCTCTCCTCTCTTAG----- mirR 23 1
-----ACACGGCTCTCCTCTCTTCTAGTGCA----- mirR 27 1
-----ACACGGCTCTCCTCTCTTC----- mirR 19 1
-----ACACGGCTCTCCTCTCTT----- mirR 18 1
-----ATACACGGCTCTCCTCTCTTAG----- mirR 24 1
-----TCTAGTGTCAAACCTCTGCCTC----- morR 21 1
-----TCTAGTGTCAAACCTCTGC----- morR 18 1
-----TAGTGTCAAACCTCTGCCT----- morR 18 1
-----TCTAGTGTCAAACCTCTGCCTCAGAG----- morR 25 1
-----CTAGTGTCAAACCTCTGCC----- morR 18 1

```

>mmu-mir-421

```

AGGCCTCATTAATGTTTGTGAATGAAAAATGAATCATCAACAGACATTAATGGGCGCCTGCTCTGTGATCTCCATGGGCT species len reads
-GGCCTCATTAATGTTTGTG----- mirL 21 983

```

```

-GGCCTCATTAAATGTTTGT----- mirL 19 491
-GGCCTCATTAAATGTTTGTGA----- mirL 22 151
-GGCCTCATTAAATGTTTGT----- mirL 18 128
-GGCCTCATTAAATGTTTGT----- mirL 20 57
-GGCCTCATTAAATGTTTGTGAA----- mirL 23 31
--CCTCATTAAATGTTTGTG----- mirL 19 23
--GCCTCATTAAATGTTTGTG----- mirL 20 16
---CTCATTAAATGTTTGTG----- mirL 18 15
--GCCTCATTAAATGTTTGT----- mirL 18 15
-GGCCTCATTAAATGTTTGTGAATG----- mirL 25 10
---CTCATTAAATGTTTGTG----- mirL 19 7
---CTCATTAAATGTTTGTGAATGA----- mirL 23 5
---CTCATTAAATGTTTGTGAAT----- mirL 21 4
---CTCATTAAATGTTTGTGAA----- mirL 20 3
--GCCTCATTAAATGTTTGTG----- mirL 21 3
AGGCCTCATTAAATGTTTGTG----- mirL 22 2
---CCTCATTAAATGTTTGTGAA----- mirL 21 2
---CCTCATTAAATGTTTGTG----- mirL 20 2
---CTCATTAAATGTTTGTGAATG----- mirL 22 1
---CCTCATTAAATGTTTGT----- mirL 18 1
---CCTCATTAAATGTTTGTGAATG----- mirL 23 1
--GCCTCATTAAATGTTTGTGAAT----- mirL 23 1
--GCCTCATTAAATGTTTGTGAATGAA----- mirL 26 1
-----ATCAACAGACATTAATGGGCGC----- mirR 23 9307
-----ATCAACAGACATTAATGGGCGCC----- mirR 24 2240
-----ATCAACAGACATTAATGGGCG----- mirR 22 2091
-----ATCAACAGACATTAATGGGC----- mirR 21 1637
-----ATCAACAGACATTAATGGG----- mirR 20 1259
-----TCAACAGACATTAATGGGCGC----- mirR 22 527
-----ATCAACAGACATTAATGG----- mirR 19 311
-----ATCAACAGACATTAATGGGCGCCT----- mirR 25 200
-----TCAACAGACATTAATGGGCGCC----- mirR 23 116
-----CAACAGACATTAATGGGCGC----- mirR 21 112
-----AACAGACATTAATGGGCGC----- mirR 20 77
-----TCAACAGACATTAATGGGC----- mirR 20 77
-----TCAACAGACATTAATGGG----- mirR 19 62
-----TCAACAGACATTAATGGGCG----- mirR 21 61
-----AACAGACATTAATGGGCGCCTGC----- mirR 24 30
-----CAACAGACATTAATGGGCGCC----- mirR 22 25
-----AACAGACATTAATGGGCGCC----- mirR 21 24
-----AACAGACATTAATGGGCG----- mirR 19 13
-----TCAACAGACATTAATGG----- mirR 18 12
-----AACAGACATTAATGGGC----- mirR 18 10
-----CAACAGACATTAATGGG----- mirR 18 10
-----TCAACAGACATTAATGGGCGCCT----- mirR 24 9
-----CAACAGACATTAATGGGCG----- mirR 20 8

```



```

-----CAACAGACATTAATTGGGC----- mirR 19 7
-----AACAGACATTAATTGGGCGCCT----- mirR 22 7
-----AACAGACATTAATTGGGCGCCTG----- mirR 23 7
-----CAACAGACATTAATTGGGCGCCT----- mirR 23 6
-----CATCAACAGACATTAATTGGGC----- mirR 22 2
-----CATCAACAGACATTAATTGGGCGC----- mirR 24 2
-----TCATCAACAGACATTAATTGGG----- mirR 22 1
-----CATCAACAGACATTAATTGG----- mirR 20 1
-----CAACAGACATTAATTGGGCGCCTG----- mirR 24 1
-----TGCTCTGTGATCTCCATGG----- morR 19 1
-----CCTGCTCTGTGATCTCCA----- morR 18 1
-----CTGCTCTGTGATCTCCATGGGCT morR 23 1
-----GCCTGCTCTGTGATCTCC----- morR 18 1
-----CTCTGTGATCTCCATGGG----- morR 18 1

```

>mmu-mir-344d-2

| Species | len | reads |
|---------|-----|-------|
| morL    | 18  | 1     |
| morL    | 19  | 1     |
| morL    | 18  | 1     |
| mirL    | 18  | 202   |
| mirL    | 19  | 20    |
| mirL    | 18  | 1     |
| mirL    | 18  | 1     |
| mirR    | 22  | 13953 |
| mirR    | 23  | 1731  |
| mirR    | 19  | 1127  |
| mirR    | 21  | 1093  |
| mirR    | 20  | 865   |
| mirR    | 18  | 325   |
| mirR    | 19  | 94    |
| mirR    | 24  | 61    |
| mirR    | 23  | 24    |
| mirR    | 21  | 22    |
| mirR    | 20  | 14    |
| mirR    | 18  | 7     |
| mirR    | 21  | 5     |
| mirR    | 22  | 4     |
| mirR    | 21  | 3     |
| mirR    | 20  | 3     |
| mirR    | 19  | 2     |
| mirR    | 20  | 2     |
| mirR    | 22  | 2     |
| mirR    | 21  | 1     |
| mirR    | 20  | 1     |
| mirR    | 24  | 1     |

```

-----TGGATATAACCACTGCCAGACT----- mirR 22 1
-----TGGTGCTAAAGAGAAGGGA morR 19 2

>mmu-mir-344d-3
GTTTGCAGGGGAAGATTTTCATCAGTCAGGCTAGTGGTTATACTCCAGGACTTATCTGGTCCTGGATATAACCACTGCCAGACTGAATGGTGCTAAAGAGAAGGGA species len reads
GTTTGCAGGGGAAGATTTTC----- morL 19 1
-----AGTCAGGCTAGTGGTTATACTCC----- mirL 23 75
-----AGTCAGGCTAGTGGTTATACTC----- mirL 22 57
-----AGTCAGGCTAGTGGTTATACTCCA----- mirL 24 32
-----AGTCAGGCTAGTGGTTATAC----- mirL 20 20
-----AGTCAGGCTAGTGGTTATACTCCAG----- mirL 25 11
-----AGTCAGGCTAGTGGTTATACT----- mirL 21 10
-----AGTCAGGCTAGTGGTTATA----- mirL 19 4
-----TCAGGCTAGTGGTTATAC----- mirL 18 1
-----TCAGTCAGGCTAGTGGTTA----- mirL 19 1
-----CAGGCTAGTGGTTATACT----- mirL 18 1
-----ACTTATCTGGTCCTGGAT----- loop 18 2
-----GATATAACCACTGCCAGACTGA----- mirR 22 13953
-----GATATAACCACTGCCAGACTGAA----- mirR 23 1731
-----GATATAACCACTGCCAGACT----- mirR 19 1127
-----GATATAACCACTGCCAGACTG----- mirR 21 1093
-----GATATAACCACTGCCAGACT----- mirR 20 865
-----GATATAACCACTGCCAGACT----- mirR 18 325
-----ATAACCACTGCCAGACTGA----- mirR 19 94
-----GATATAACCACTGCCAGACTGAAT----- mirR 24 61
-----GGATATAACCACTGCCAGACTGA----- mirR 23 24
-----ATATAACCACTGCCAGACTGA----- mirR 21 22
-----ATAACCACTGCCAGACTGAA----- mirR 20 14
-----ATAACCACTGCCAGACTG----- mirR 18 7
-----TGGATATAACCACTGCCAGACT----- mirR 21 5
-----GGATATAACCACTGCCAGACTG----- mirR 22 4
-----GGATATAACCACTGCCAGACT----- mirR 21 3
-----TATAACCACTGCCAGACTGA----- mirR 20 3
-----ATATAACCACTGCCAGACT----- mirR 19 2
-----GGATATAACCACTGCCAGACT----- mirR 20 2
-----ATATAACCACTGCCAGACTGAA----- mirR 22 2
-----CTGGATATAACCACTGCCAGACT----- mirR 21 1
-----ATATAACCACTGCCAGACTG----- mirR 20 1
-----GGATATAACCACTGCCAGACTGAA----- mirR 24 1
-----TGGATATAACCACTGCCAGACT----- mirR 22 1
-----TGGTGCTAAAGAGAAGGGA morR 19 2

>mmu-mir-344d-1
CTGCAGGGGAAGATTTTCATCAGTCAGGCTGCTGGCTATACACCAGGACTTATCTGGTCCTGGATATAACCACTGCCAGACTGAAAGGTG species len reads
CTGCAGGGGAAGATTTCA----- morL 18 1
-----AGTCAGGCTGCTGGCTATACACC----- mirL 23 2

```

```

-----AGTCAGGCTGCTGGCTATACACCAG----- mirL 25 1
-----AGTCAGGCTGCTGGCTATACACCA----- mirL 24 1
-----ACCAGGACTTATCTGGTC----- loop 18 2
-----ACTTATCTGGTCCTGGAT----- loop 18 2
-----GATATAAACCCTGCCAGACTGA----- mirR 22 13953
-----GATATAAACCCTGCCAGACTGAA----- mirR 23 1731
-----GATATAAACCCTGCCAGACTG----- mirR 19 1127
-----GATATAAACCCTGCCAGACTG----- mirR 21 1093
-----GATATAAACCCTGCCAGACT----- mirR 20 865
-----GATATAAACCCTGCCAGACT----- mirR 18 325
-----ATAAACCCTGCCAGACTGA----- mirR 19 94
-----GATATAAACCCTGCCAGACTGAAA----- mirR 24 67
-----GGATATAAACCCTGCCAGACTGA----- mirR 23 24
-----ATATAAACCCTGCCAGACTGA----- mirR 21 22
-----ATAAACCCTGCCAGACTGAA----- mirR 20 14
-----ATAAACCCTGCCAGACTG----- mirR 18 7
-----TGGATATAAACCCTGCCAGACT----- mirR 21 5
-----GGATATAAACCCTGCCAGACTG----- mirR 22 4
-----TATAAACCCTGCCAGACTGA----- mirR 20 3
-----GGATATAAACCCTGCCAGACT----- mirR 21 3
-----GGATATAAACCCTGCCAGACT----- mirR 20 2
-----ATATAAACCCTGCCAGACTGAA----- mirR 22 2
-----ATATAAACCCTGCCAGACT----- mirR 19 2
-----ATATAAACCCTGCCAGACTG----- mirR 20 1
-----GGATATAAACCCTGCCAGACTGAA----- mirR 24 1
-----TGGATATAAACCCTGCCAGACT----- mirR 22 1
-----CTGGATATAAACCCTGCCAGACT----- mirR 21 1
-----ATAAACCCTGCCAGACTGAAAGGTG----- mirR 25 1

>mmu-mir-770
CAGCCTAACCTTGTCAGAAGCCACCTTCTGTGCCCCAGCACCAGTGTCTGGGCCACGTGAGCAACGCCACGTGGGCCTGACGTGGAGCTGGGGCCGCAGGGGTCTGATGGCCTCCTGTTTCAGA species len
-----CCACCTTCTGTGCCCCA----- morL 18 23
-----AAGCCACCTTCTGTGCCCC----- morL 20 18
-----AGCCACCTTCTGTGCCCC----- morL 19 14
-----AAGCCACCTTCTGTGCCCC----- morL 19 7
-----AAGCCACCTTCTGTGCCCCA----- morL 21 5
-----AGCCACCTTCTGTGCCCCA----- morL 20 3
-----GCCACCTTCTGTGCCCCA----- morL 19 2
-----CACCTTCTGTGCCCCAG----- morL 18 2
-----AGCCACCTTCTGTGCCCC----- morL 18 2
-----GCCACCTTCTGTGCCCCAG----- morL 20 1
-----GAAGCCACCTTCTGTGCC----- morL 18 1
-----CCACCTTCTGTGCCCCAG----- morL 19 1
CAGCCTAACCTTGTCAGAAGCCACCTTCTGTGCC----- morL 34 1
-----AAGCCACCTTCTGTGCC----- morL 18 1
-----AGCACCACGTGTCTGGGCCACG----- mirL 22 1473

```

```

-----AGCACCACGTGTCTGGGCCACGT----- mirL 23 1234
-----AGCACCACGTGTCTGGGCCAC----- mirL 21 1178
-----AGCACCACGTGTCTGGGCCACGTG----- mirL 24 829
-----AGCACCACGTGTCTGGGC----- mirL 18 708
-----AGCACCACGTGTCTGGGCC----- mirL 19 502
-----AGCACCACGTGTCTGGGCCA----- mirL 20 382
-----ACCACGTGTCTGGGCCACG----- mirL 19 24
-----ACCACGTGTCTGGGCCAC----- mirL 18 20
-----CACCACGTGTCTGGGCCACG----- mirL 20 8
-----ACCACGTGTCTGGGCCACGT----- mirL 20 7
-----GCACCACGTGTCTGGGCCAC----- mirL 20 7
-----CACCACGTGTCTGGGCCA----- mirL 18 6
-----GCACCACGTGTCTGGGCCACG----- mirL 21 5
-----GCACCACGTGTCTGGGCCA----- mirL 19 3
-----ACCACGTGTCTGGGCCACGTG----- mirL 21 3
-----CACCACGTGTCTGGGCCAC----- mirL 19 1
-----CCAGCACCACGTGTCTGGGCCA----- mirL 22 1
-----GCACCACGTGTCTGGGCCACGTG----- mirL 23 1
-----GCACCACGTGTCTGGGCCACGT----- mirL 22 1
-----CCCAGCACCACGTGTCTGGGC----- mirL 21 1
-----CCCAGCACCACGTGTCTG----- mirL 18 1
-----CCCAGCACCACGTGTCTGG----- mirL 19 1
-----CAGCACCACGTGTCTGGGC----- mirL 19 1
-----CAGCACCACGTGTCTGGGCCACGT----- mirL 24 1
-----CGTGGGCCTGACGTGGAGCTGG----- mirR 22 2866
-----GTGGGCCTGACGTGGAGCTGG----- mirR 21 1608
-----CGTGGGCCTGACGTGGAGCTG----- mirR 21 1424
-----CGTGGGCCTGACGTGGAGCTGGG----- mirR 23 656
-----CGTGGGCCTGACGTGGAGC----- mirR 19 611
-----GTGGGCCTGACGTGGAGCTG----- mirR 20 552
-----GTGGGCCTGACGTGGAGCTGGG----- mirR 22 502
-----CGTGGGCCTGACGTGGAGCT----- mirR 20 456
-----TGGGCCTGACGTGGAGCTGGGGC----- mirR 23 433
-----GTGGGCCTGACGTGGAGCTGGGG----- mirR 23 403
-----GTGGGCCTGACGTGGAGCTGGGGC----- mirR 24 389
-----CGTGGGCCTGACGTGGAG----- mirR 18 297
-----CGTGGGCCTGACGTGGAGCTGGGGC----- mirR 25 247
-----GTGGGCCTGACGTGGAGC----- mirR 18 218
-----GTGGGCCTGACGTGGAGCTGGGGCC----- mirR 25 210
-----TGGGCCTGACGTGGAGCTGG----- mirR 20 205
-----TGGGCCTGACGTGGAGCTGGGG----- mirR 22 191
-----TGGGCCTGACGTGGAGCTGGG----- mirR 21 184
-----TGGGCCTGACGTGGAGCTGGGGCC----- mirR 24 165
-----TGGGCCTGACGTGGAGCTG----- mirR 19 89
-----TGGGCCTGACGTGGAGCT----- mirR 18 37
-----GGGCCTGACGTGGAGCTGG----- mirR 19 15

```

```

-----GGGCCTGACGTGGAGCTG-----mirR 18 15
-----GGGCCTGACGTGGAGCTGGGGC-----mirR 22 12
-----GGGCCTGACGTGGAGCTGGGG-----mirR 21 8
-----ACGTGGGCCTGACGTGGAGCTGG-----mirR 23 5
-----GGGCCTGACGTGGAGCTGGG-----mirR 20 4
-----GGGCCTGACGTGGAGCTGGGGCC-----mirR 23 3
-----CACGTGGGCCTGACGTGGAGC-----mirR 21 2
-----ACGTGGGCCTGACGTGGAG-----mirR 19 1
-----ACGTGGGCCTGACGTGGAGC-----mirR 20 1
-----GGCCGCAGGGGTCTGATGGCCTCCTGTTTCAGA-----morR 33 8
-----GGCCGCAGGGGTCTGATGGCCTCC-----morR 24 6
-----GGCCGCAGGGGTCTGATGGCCTCC-----morR 25 1
-----GGCCGCAGGGGTCTGATGGC-----morR 20 1

```

>mmu-mir-652

| Species | len | reads |
|---------|-----|-------|
| morL    | 18  | 8     |
| morL    | 18  | 3     |
| morL    | 18  | 1     |
| morL    | 18  | 1     |
| morL    | 22  | 1     |
| morL    | 20  | 1     |
| mirL    | 24  | 59    |
| mirL    | 23  | 49    |
| mirL    | 22  | 31    |
| mirL    | 19  | 25    |
| mirL    | 25  | 19    |
| mirL    | 21  | 12    |
| mirL    | 20  | 11    |
| mirL    | 19  | 3     |
| mirL    | 19  | 1     |
| mirL    | 18  | 1     |
| mirL    | 21  | 1     |
| mirL    | 18  | 1     |
| mirL    | 18  | 1     |
| mirL    | 21  | 1     |
| mirL    | 19  | 1     |
| loop    | 18  | 2     |
| mirR    | 22  | 9408  |
| mirR    | 20  | 3182  |
| mirR    | 21  | 2780  |
| mirR    | 19  | 824   |
| mirR    | 23  | 680   |
| mirR    | 24  | 268   |
| mirR    | 18  | 253   |
| mirR    | 21  | 73    |

```

-----ATGGCGCCACTAGGGTTGTGCA----- mirR 22 37
-----ATGGCGCCACTAGGGTTG----- mirR 18 27
-----ATGGCGCCACTAGGGTTGTG----- mirR 20 24
-----ATGGCGCCACTAGGGTTGT----- mirR 19 21
-----TTGAATGGCGCCACTAGGGTT----- mirR 21 18
-----ATGGCGCCACTAGGGTTGTGCA----- mirR 23 15
-----GAATGGCGCCACTAGGGTTGTG----- mirR 23 12
-----TTGAATGGCGCCACTAGGG----- mirR 19 11
-----TGAATGGCGCCACTAGGGTTGT----- mirR 22 11
-----TGGCGCCACTAGGGTTGTGCA----- mirR 21 10
-----TGGCGCCACTAGGGTTGT----- mirR 18 10
-----TGGCGCCACTAGGGTTGTGCA----- mirR 22 9
-----TTGAATGGCGCCACTAGGGT----- mirR 20 8
-----GGCGCCACTAGGGTTGTG----- mirR 19 8
-----GGCGCCACTAGGGTTGTGCA----- mirR 20 7
-----TGGCGCCACTAGGGTTGT----- mirR 19 7
-----GAATGGCGCCACTAGGGTTGT----- mirR 21 6
-----GGCGCCACTAGGGTTGTGCA----- mirR 21 6
-----GGCGCCACTAGGGTTGT----- mirR 18 5
-----TGAATGGCGCCACTAGGGTT----- mirR 20 4
-----GAATGGCGCCACTAGGGTTG----- mirR 20 3
-----GAATGGCGCCACTAGGGTTGT----- mirR 22 3
-----TGAATGGCGCCACTAGGGTTGTG----- mirR 24 2
-----TGAATGGCGCCACTAGGGTTGT----- mirR 23 2
-----GAATGGCGCCACTAGGGT----- mirR 18 2
-----TGAATGGCGCCACTAGGGT----- mirR 19 2
-----GAATGGCGCCACTAGGGTTGTG----- mirR 24 1
-----TGAATGGCGCCACTAGGGTTG----- mirR 21 1
-----ATGGCGCCACTAGGGTTGTGCA----- mirR 24 1
-----TGAATGGCGCCACTAGGG----- mirR 18 1
-----TTGAATGGCGCCACTAGG----- mirR 18 1
-----TGGCGCCACTAGGGTTGTG----- mirR 20 1
-----CAGTGTACAGCCTACACA morR 18 1

>mmu-mir-700
TTGATTTCTTCACTGGGAGTAAGGCTCCTTCTGTGCTTGCAGGGGAGAAATACGAACTGCACGCGGGAACCGAGTCCACCCCAGTGTGGTGGTGCACGT species len reads
----TTCCTTCACTGGGAGTAA----- morL 19 1
----TTCCTTCACTGGGAGTAA----- morL 18 1
-TGATTTCTTCACTGGGA----- morL 18 1
TTGATTTCTTCACTGGGAGT----- morL 21 1
----TTCCTTCACTGGGAGTA----- morL 18 1
-----TAAGGCTCCTTCTGTGCTTGC----- mirL 22 4438
-----TAAGGCTCCTTCTGTGCTTGC----- mirL 23 2065
-----TAAGGCTCCTTCTGTGCTTGCAG----- mirL 24 395
-----TAAGGCTCCTTCTGTGCTTGC----- mirL 21 382
-----TAAGGCTCCTTCTGTGCTT----- mirL 20 353

```

```

-----TAAGGCTCCTTCCTGTGCTTGCAAG----- mirL 25 152
-----AAGGTCCTTCCTGTGCTTGC----- mirL 21 141
-----TAAGGCTCCTTCCTGTGCT----- mirL 19 138
-----AAGGTCCTTCCTGTGCTTGCA----- mirL 22 101
-----AAGGTCCTTCCTGTGCTTGCA----- mirL 23 26
-----AAGGTCCTTCCTGTGCTT----- mirL 19 21
-----AAGGTCCTTCCTGTGCTTG----- mirL 20 15
-----AAGGTCCTTCCTGTGCTTGCAAG----- mirL 24 6
-----AAGGTCCTTCCTGTGCTTGCAAG----- mirL 25 5
-----AGGTCCTTCCTGTGCTTGCA----- mirL 21 1
-----GTAAGGTCCTTCCTGTGCTTGC----- mirL 23 1
-----GCAGGGGAGAAATACGAA----- loop 18 1
-----CACGCGGGAACCGAGTCCAC----- mirR 20 2965
-----CACGCGGGAACCGAGTCCACC----- mirR 21 2519
-----CACGCGGGAACCGAGTCCACCC----- mirR 22 1441
-----CACGCGGGAACCGAGTCCA----- mirR 19 906
-----CACGCGGGAACCGAGTCCACCCC----- mirR 23 350
-----CACGCGGGAACCGAGTCC----- mirR 18 180
-----GCACGCGGGAACCGAGTCCACC----- mirR 22 147
-----CACGCGGGAACCGAGTCCACCCCC----- mirR 24 138
-----GCACGCGGGAACCGAGTCCAC----- mirR 21 122
-----GCACGCGGGAACCGAGTCCACCC----- mirR 23 52
-----CGCGGGAACCGAGTCCACC----- mirR 19 47
-----ACGCGGGAACCGAGTCCACC----- mirR 20 44
-----GCGGGAACCGAGTCCACC----- mirR 18 37
-----ACGCGGGAACCGAGTCCAC----- mirR 19 36
-----GCACGCGGGAACCGAGTCCA----- mirR 20 31
-----GCACGCGGGAACCGAGTCC----- mirR 19 29
-----CGCGGGAACCGAGTCCACCC----- mirR 20 24
-----CGCGGGAACCGAGTCCAC----- mirR 18 20
-----GCGGGAACCGAGTCCACCC----- mirR 19 13
-----TGCACGCGGGAACCGAGTCCAC----- mirR 22 11
-----ACGCGGGAACCGAGTCCA----- mirR 18 9
-----ACGCGGGAACCGAGTCCACCC----- mirR 21 9
-----GCACGCGGGAACCGAGTC----- mirR 18 8
-----GCACGCGGGAACCGAGTCCACCCC----- mirR 24 6
-----GCGGGAACCGAGTCCACCCC----- mirR 20 5
-----CGCGGGAACCGAGTCCACCCC----- mirR 21 4
-----TGCACGCGGGAACCGAGTCC----- mirR 20 4
-----TGCACGCGGGAACCGAGTCCA----- mirR 21 4
-----ACGCGGGAACCGAGTCCACCCC----- mirR 22 4
-----TGCACGCGGGAACCGAGTC----- mirR 19 1
-----TGCACGCGGGAACCGAGTCCACC----- mirR 23 1
-----GCGGGAACCGAGTCCACCCC----- mirR 21 1
-----CAGTGTGGTGGTGCACGT morR 18 3
-----CCCCAGTGTGGTGGTGCAC-- morR 19 1

```

```
-----CCCCAGTGTGGTGGTGCA--- morR 18 1
-----ACCCCAGTGTGGTGGTG---- morR 18 1
-----CCCCAGTGTGGTGGTGC---- morR 18 1
```

>mmu-mir-451

```
GAAACCGTTACCATTACTGAGTTTAGTAATGGTAACGGTTCTCTTGCTGCTCCCACAAACTGTGCCAAGAAGAGCT species len reads
-AAACCGTTACCATTACTGAGT----- mirL 21 8424
-AAACCGTTACCATTACTGAG----- mirL 20 3404
-AAACCGTTACCATTACTGA----- mirL 19 3156
-AAACCGTTACCATTACTG----- mirL 18 1872
--AACCGTTACCATTACTGA----- mirL 18 28
--AACCGTTACCATTACTGAG----- mirL 19 23
---ACCGTTACCATTACTGAG----- mirL 18 21
---CCGTACCATTACTGAGT----- mirL 18 21
---ACCGTTACCATTACTGAGT----- mirL 19 12
--AACCGTTACCATTACTGAGT----- mirL 20 8
GAAACCGTTACCATTACTGAGT----- mirL 22 3
GAAACCGTTACCATTACTG----- mirL 19 1
GAAACCGTTACCATTACTGAG----- mirL 21 1
GAAACCGTTACCATTACT----- mirL 18 1
-----TTTAGTAATGGTAACGGTTCT----- loop 21 1
-----CTCTTGCTGCTCCCACAAAC----- mirR 20 278
-----TCTTGCTGCTCCCACAAAC----- mirR 19 55
-----CTCTTGCTGCTCCCACAAA----- mirR 19 9
-----CTCTTGCTGCTCCCACAA----- mirR 18 7
-----CTCTTGCTGCTCCCACAAACT----- mirR 21 5
-----TCTTGCTGCTCCCACAAACT----- mirR 20 4
-----TTCTCTTGCTGCTCCCACAAA----- mirR 21 2
-----TCTTGCTGCTCCCACAAA----- mirR 18 1
-----TCTTGCTGCTCCCACAAACTG----- mirR 21 1
-----TCTCTTGCTGCTCCCACAAAC----- mirR 21 1
-----CTCTTGCTGCTCCCACAAACTG----- mirR 22 1
-----CTTGCTGCTCCCACAAACT----- mirR 19 1
-----AACTGTGCCAAGAAGAGCT morR 19 1
```

>mmu-mir-33

```
ACCTCCTGGCGGGCAGCTGTGGTGCATTGTAGTTGCATTGCATGTTCTGGCAATACCTGTGCAATGTTCCACAGTGCATCACGGAGGCTGCCCTGACTGCCACGGTGC species len reads
-CCTCCTGGCGGGCAGCTGTG----- morL 20 3
--CTCCTGGCGGGCAGCTGT----- morL 18 2
ACCTCCTGGCGGGCAGCTGTG----- morL 21 2
---TCCTGGCGGGCAGCTGTG----- morL 18 1
-CCTCCTGGCGGGCAGCTGTGGT----- morL 22 1
---TCCTGGCGGGCAGCTGTGG----- morL 19 1
--CTCCTGGCGGGCAGCTGTGG----- morL 20 1
-----GTGCATTGTAGTTGCATTGC----- mirL 20 5294
-----GTGCATTGTAGTTGCATTG----- mirL 19 1218
```



```

-----GTGCATTGTAGTTGCATTGCA----- mirL 21 734
-----GTGCATTGTAGTTGCATT----- mirL 18 125
-----GTGCATTGTAGTTGCATTGCAT----- mirL 22 81
-----GTGCATTGTAGTTGCATTGCATG----- mirL 23 28
-----GTGCATTGTAGTTGCATTGCATGT----- mirL 24 18
-----TGCATTGTAGTTGCATTG----- mirL 18 18
-----CATTGTAGTTGCATTGCA----- mirL 18 7
-----TGCATTGTAGTTGCATTGC----- mirL 19 4
-----GCATTGTAGTTGCATTGC----- mirL 18 3
-----GCATTGTAGTTGCATTGCA----- mirL 19 2
-----TGCATTGTAGTTGCATTGCAT----- mirL 21 2
-----CATTGTAGTTGCATTGCAT----- mirL 19 1
-----TGCATTGTAGTTGCATTGCA----- mirL 20 1
-----GGTGCATTGTAGTTGCATTG----- mirL 20 1
-----TGGTGCATTGTAGTTGCATTGC----- mirL 22 1
-----GGTGCATTGTAGTTGCATTGC----- mirL 21 1
-----TGTTCTGGCAATACCTGT----- loop 18 2
-----TGTTCTGGCAATACCTGTG----- loop 19 2
-----TGTTCTGGCAATACCTGTGCA----- loop 21 1
-----TGTTCTGGCAATACCTGTGC----- loop 20 1
-----CAATGTTTCCACAGTGCATCA----- mirR 21 5684
-----CAATGTTTCCACAGTGCAT----- mirR 19 1252
-----CAATGTTTCCACAGTGCATCAC----- mirR 22 1182
-----CAATGTTTCCACAGTGCATC----- mirR 20 925
-----CAATGTTTCCACAGTGCATCA----- mirR 18 141
-----CAATGTTTCCACAGTGCATCAG----- mirR 23 107
-----TGTTTCCACAGTGCATCA----- mirR 18 100
-----AATGTTTCCACAGTGCATCAC----- mirR 21 82
-----ATGTTTCCACAGTGCATCA----- mirR 19 75
-----ATGTTTCCACAGTGCATCAC----- mirR 20 37
-----ATGTTTCCACAGTGCATC----- mirR 18 17
-----AATGTTTCCACAGTGCATCA----- mirR 20 16
-----CAATGTTTCCACAGTGCATCACGG----- mirR 24 13
-----AATGTTTCCACAGTGCAT----- mirR 18 11
-----AATGTTTCCACAGTGCATC----- mirR 19 8
-----ATGTTTCCACAGTGCATCAG----- mirR 21 7
-----AATGTTTCCACAGTGCATCAG----- mirR 22 6
-----GCAATGTTTCCACAGTGCATCA----- mirR 22 4
-----AATGTTTCCACAGTGCATCACGG----- mirR 23 2
-----TGCAATGTTTCCACAGTGCATC----- mirR 22 2
-----TGTTTCCACAGTGCATCAC----- mirR 19 2
-----TGCAATGTTTCCACAGTGCATCA----- mirR 23 2
-----AATGTTTCCACAGTGCATCACGGA----- mirR 24 1
-----GCAATGTTTCCACAGTGCATCAC----- mirR 23 1
-----GTGCAATGTTTCCACAGTGC----- mirR 20 1
-----CGGAGGCCTGCCCTGACTGC----- morR 20 2

```

```

-----CGGAGGCCTGCCCTGACTGCC----- morR 22 1
-----CGGAGGCCTGCCCTGACTGCCACGGTGC morR 29 1
-----CACGAGGCCTGCCCTGACTG----- morR 21 1

>mmu-mir-410
CTGCGGTCAACACTGGGTACTTGAGGAGAGGTTGTCTGTGATGAGTTCGCTTTTAAATGACGAATATAACACAGATGGCCTGTTTTCAATACCACCTGCCACT species len reads
-----CAACACTGGGTACTTGAGGAG----- morL 21 10
-----CAACACTGGGTACTTGAGGAGA----- morL 22 9
-----AACACTGGGTACTTGAGGAG----- morL 20 6
-----TCAACACTGGGTACTTGAGGAG----- morL 22 3
-----ACACTGGGTACTTGAGGAG----- morL 19 3
-----GTCAACACTGGGTACTTGAGGA----- morL 22 2
---CGGTCAACACTGGGTACTTGAGGA--- morL 24 2
-----CAACACTGGGTACTTGAG----- morL 18 2
-----CACTGGGTACTTGAGGAGA----- morL 19 1
-----ACACTGGGTACTTGAGGAGA----- morL 20 1
---CGGTCAACACTGGGTACTTGAGGAG--- morL 25 1
--GCGGTCAACACTGGGTACTTGAGGAGAG-- morL 28 1
-----CACTGGGTACTTGAGGAG----- morL 18 1
---CGGTCAACACTGGGTACTTGAGGAGA--- morL 26 1
-----AACACTGGGTACTTGAGGAGA----- morL 21 1
-----TCAACACTGGGTACTTGAGGA----- morL 21 1
---GGTCAACACTGGGTACTTGAGGAGA--- morL 25 1
---GGTCAACACTGGGTACTTGAGG--- morL 22 1
CTGCGGTCAACACTGGGTACTTGAGGAG--- morL 28 1
--GCGGTCAACACTGGGTACTTGAGGA--- morL 25 1
-----AGGTTGTCTGTGATGAGTTCG----- mirL 21 78
-----AGGTTGTCTGTGATGAGTTCG----- mirL 22 31
-----AGGTTGTCTGTGATGAGTTC----- mirL 20 25
-----AGGTTGTCTGTGATGAGTT----- mirL 19 7
-----AGGTTGTCTGTGATGAGTTCGCTTT----- mirL 25 6
-----AGGTTGTCTGTGATGAGTTCGCT----- mirL 23 5
-----GAGGTTGTCTGTGATGAGTTCG----- mirL 22 4
-----GAGGTTGTCTGTGATGAGT----- mirL 19 2
-----AGGTTGTCTGTGATGAGT----- mirL 18 2
-----AGAGTTGTCTGTGATGA----- mirL 18 1
-----GAGGTTGTCTGTGATGAGTTC----- mirL 21 1
-----GAGAGTTGTCTGTGATG----- mirL 18 1
-----GTGTCTGTGATGAGTTC----- mirL 18 1
-----AGAGTTGTCTGTGATGAGTTC----- mirL 22 1
-----GAGGTTGTCTGTGATGAG----- mirL 18 1
-----AATATAACACAGATGGCCTGT----- mirR 21 9668
-----AATATAACACAGATGGCCTGTT----- mirR 22 2676
-----AATATAACACAGATGGCCTG----- mirR 20 1781
-----AATATAACACAGATGGCCTGTTT----- mirR 23 984
-----AATATAACACAGATGGCC----- mirR 18 810

```

```

-----AATATAACACAGATGGCCT----- mirR 19 699
-----AATATAACACAGATGGCCTGTTT----- mirR 24 60
-----ATAACACAGATGGCCTGTT----- mirR 19 34
-----GAATATAACACAGATGGCCTGT----- mirR 22 33
-----ATATAACACAGATGGCCTGTT----- mirR 21 31
-----TATAACACAGATGGCCTGTT----- mirR 21 29
-----TATAACACAGATGGCCTGTT----- mirR 20 23
-----ATATAACACAGATGGCCTG----- mirR 19 20
-----ATATAACACAGATGGCCTGT----- mirR 20 20
-----ATATAACACAGATGGCCTGTT----- mirR 22 20
-----ATAACACAGATGGCCTGT----- mirR 18 17
-----TATAACACAGATGGCCTGT----- mirR 19 16
-----ATAACACAGATGGCCTGTT----- mirR 20 15
-----ATATAACACAGATGGCCT----- mirR 18 10
-----TATAACACAGATGGCCTG----- mirR 18 8
-----TATAACACAGATGGCCTGTTT----- mirR 22 5
-----GAATATAACACAGATGGCCTGTT----- mirR 24 4
-----CGAATATAACACAGATGGCCT----- mirR 21 3
-----ATATAACACAGATGGCCTGTTT----- mirR 23 3
-----CGAATATAACACAGATGGCCTGT----- mirR 23 3
-----GAATATAACACAGATGGCCTG----- mirR 21 2
-----GAATATAACACAGATGGCCTGTT----- mirR 23 2
-----GAATATAACACAGATGGCCT----- mirR 20 2
-----TATAACACAGATGGCCTGTTTTC----- mirR 23 2
-----CGAATATAACACAGATGGCCTGTT----- mirR 24 2
-----ATATAACACAGATGGCCTGTTTTC----- mirR 24 2
-----CGAATATAACACAGATGGCCTG----- mirR 22 2
-----GAATATAACACAGATGGCC----- mirR 19 2
-----CGAATATAACACAGATGGCC----- mirR 20 1
-----ACGAATATAACACAGATGGCCTGTT----- mirR 25 1
-----TATAACACAGATGGCCTGTTTTCAATAC----- mirR 28 1
-----CGAATATAACACAGATGG----- mirR 18 1
-----ACGAATATAACACAGATGGCCTGT----- mirR 24 1
-----ACGAATATAACACAGATGGC----- mirR 20 1
-----CGAATATAACACAGATGGC----- mirR 19 1
-----ACGAATATAACACAGATGGCC----- mirR 21 1
-----ATAACACAGATGGCCTGTTTTC----- mirR 22 1
-----TTTCAATACCACCTGCCA-- morR 18 2
-----TTTCAATACCACCTGCCAC-- morR 19 1
-----TGTTTTCAATACCACCTG----- morR 18 1
-----TTTCAATACCACCTGCCACT morR 20 1

>mmu-mir-494
GCTAATTGATACTTGAAGGAGAGGTTGTCCGTGTTGTCTTCTTTATTTATGATGAAACATACACGGGAAACCTCTTTTTTAGTATCAAATCCCACCC species len reads
---AATTGATACTTGAAGGAGA----- morL 19 1
GCTAATTGATACTTGAAG----- morL 18 1

```

```

-----AGGTTGTCCGTGTTGTCTTCT----- mirL 21 8
-----GAGGTTGTCCGTGTTGTC----- mirL 18 8
-----AGGTTGTCCGTGTTGTCTTCT----- mirL 22 6
-----AGGTTGTCCGTGTTGTCTTCT----- mirL 23 5
-----AGGTTGTCCGTGTTGTCTT----- mirL 19 5
-----GAGGTTGTCCGTGTTGTCTTCT----- mirL 22 3
-----AGGTTGTCCGTGTTGTCT----- mirL 18 3
-----AGGTTGTCCGTGTTGTCTTCT----- mirL 20 3
-----TTGTCCGTGTTGTCTTCT----- mirL 19 1
-----AGAGGTTGTCCGTGTTGTC----- mirL 19 1
-----GAGGTTGTCCGTGTTGTCT----- mirL 19 1
-----GAGAGGTTGTCCGTGTTGTCT----- mirL 21 1
-----TTGTCCGTGTTGTCTTCT----- mirL 18 1
-----AGAGGTTGTCCGTGTTGTCTT----- mirL 21 1
-----GAGGTTGTCCGTGTTGTCTTCT----- mirL 21 1
-----TGAAACATACACGGGAAACCTCTT----- mirR 24 6036
-----TGAAACATACACGGGAAACCTC----- mirR 22 2615
-----TGAAACATACACGGGAAACCT----- mirR 21 2174
-----TGAAACATACACGGGAAACCTCT----- mirR 23 1855
-----TGAAACATACACGGGAAACCC----- mirR 20 675
-----GAAACATACACGGGAAACCTCTT----- mirR 23 467
-----TGAAACATACACGGGAAACCTCTTT----- mirR 25 370
-----TGAAACATACACGGGAAA----- mirR 18 310
-----GAAACATACACGGGAAACCTC----- mirR 21 220
-----GAAACATACACGGGAAACCT----- mirR 20 205
-----GAAACATACACGGGAAACCTCT----- mirR 22 140
-----AACATACACGGGAAACCTC----- mirR 19 129
-----AACATACACGGGAAACCTCTT----- mirR 21 126
-----AACATACACGGGAAACCT----- mirR 18 98
-----AAACATACACGGGAAACCTCTT----- mirR 22 67
-----AAACATACACGGGAAACCTC----- mirR 20 62
-----GAAACATACACGGGAAACCC----- mirR 19 60
-----GAAACATACACGGGAAACCTCTTT----- mirR 24 41
-----AAACATACACGGGAAACCT----- mirR 19 40
-----AACATACACGGGAAACCTCT----- mirR 20 39
-----AAACATACACGGGAAACCTCT----- mirR 21 26
-----GAAACATACACGGGAAAC----- mirR 18 18
-----AAACATACACGGGAAACCC----- mirR 18 12
-----ATGAAACATACACGGGAAACCTCTT----- mirR 25 11
-----AACATACACGGGAAACCTCTTT----- mirR 22 10
-----ATGAAACATACACGGGAAACCTC----- mirR 23 4
-----AAACATACACGGGAAACCTCTTT----- mirR 23 3
-----ATGAAACATACACGGGAAACCC----- mirR 21 1
-----AACATACACGGGAAACCTCTTTTT----- mirR 24 1
-----ATGAAACATACACGGGAAAC----- mirR 20 1
-----ATGAAACATACACGGGAA----- mirR 18 1

```

```

-----AACATACACGGGAAACCTCTTTTTTA----- mirR 26 1
-----ATGAAACATACACGGGAAACCT----- mirR 22 1
-----ATGAAACATACACGGGAAACCTCT----- mirR 24 1
-----TTTAGTATCAAATCCCACCC morR 20 1

```

>mmu-mir-496

| Species | len | reads |
|---------|-----|-------|
| morL    | 20  | 4     |
| morL    | 22  | 2     |
| morL    | 20  | 2     |
| morL    | 19  | 1     |
| morL    | 18  | 1     |
| morL    | 21  | 1     |
| morL    | 18  | 1     |
| morL    | 18  | 1     |
| mirL    | 20  | 102   |
| mirL    | 21  | 75    |
| mirL    | 22  | 42    |
| mirL    | 19  | 8     |
| mirL    | 22  | 8     |
| mirL    | 19  | 6     |
| mirL    | 23  | 5     |
| mirL    | 24  | 3     |
| mirL    | 20  | 3     |
| mirL    | 23  | 3     |
| mirL    | 24  | 2     |
| mirL    | 18  | 2     |
| mirL    | 28  | 1     |
| mirL    | 18  | 1     |
| mirL    | 21  | 1     |
| mirL    | 19  | 1     |
| loop    | 18  | 1     |
| mirR    | 21  | 3987  |
| mirR    | 20  | 2704  |
| mirR    | 22  | 2115  |
| mirR    | 21  | 1907  |
| mirR    | 19  | 1230  |
| mirR    | 22  | 826   |
| mirR    | 20  | 486   |
| mirR    | 23  | 397   |
| mirR    | 18  | 346   |
| mirR    | 23  | 282   |
| mirR    | 19  | 254   |
| mirR    | 18  | 237   |
| mirR    | 21  | 105   |
| mirR    | 20  | 84    |

```

-----TGAGTATTACATGGCCAATCTCCT----- mirR 24 80
-----ATTACATGGCCAATCTCC----- mirR 18 79
-----GAGTATTACATGGCCAATCTCC----- mirR 22 28
-----GAGTATTACATGGCCAATC----- mirR 19 22
-----GTATTACATGGCCAATCTC----- mirR 19 15
-----AGTATTACATGGCCAATCTCCTTT----- mirR 24 10
-----GTATTACATGGCCAATCT----- mirR 18 7
-----ATTACATGGCCAATCTCCT----- mirR 19 5
-----ATGAGTATTACATGGCCAATCT----- mirR 22 4
-----TATTACATGGCCAATCTC----- mirR 18 4
-----GAGTATTACATGGCCAAT----- mirR 18 4
-----ATTACATGGCCAATCTCCTT----- mirR 20 4
-----GAGTATTACATGGCCAATCTCCT----- mirR 23 4
-----GTATTACATGGCCAATCTCC----- mirR 20 3
-----GTATTACATGGCCAATCTCCT----- mirR 21 2
-----GTATTACATGGCCAATCTCCTT----- mirR 22 2
-----ATGAGTATTACATGGCCAATCTCC----- mirR 24 1
-----ATGAGTATTACATGGCCA----- mirR 18 1
-----ATTACATGGCCAATCTCCTTTC----- mirR 22 1
-----ATGAGTATTACATGGCCAAT----- mirR 20 1
-----ATTACATGGCCAATCTCCTTT----- mirR 21 1
-----ATGAGTATTACATGGCCAATCTC----- mirR 23 1
-----GAGTATTACATGGCCAATCTCCTTTCG----- mirR 27 1
-----TCCTTTCGGCACTAAAAT----- morR 18 2
-----TTCGGCACTAAAATCTTC morR 18 1

```

>mmu-mir-380

```

CTCTCCATGGTACCTGAAAAGATGGTTGACCATAGAACATGCGCTACTTCTGTGTCGTATGTAGTATGGTCCACATCTTCTCGTTATCAAAGTCATTCGT species len reads
---TCCATGGTACCTGAAAAG----- morL 18 2
CTCTCCATGGTACCTGAAAAG----- morL 21 1
---CTCCATGGTACCTGAAAAG----- morL 18 1
-----TGGTTGACCATAGAACATGCGC----- mirL 22 1246
-----ATGGTTGACCATAGAACATGC----- mirL 21 880
-----TGGTTGACCATAGAACATGCG----- mirL 21 750
-----TGGTTGACCATAGAACATGC----- mirL 20 698
-----ATGGTTGACCATAGAACATGCG----- mirL 22 470
-----ATGGTTGACCATAGAACATGCGC----- mirL 23 431
-----TGGTTGACCATAGAACATG----- mirL 19 282
-----ATGGTTGACCATAGAACATG----- mirL 20 199
-----GGTTGACCATAGAACATGCGC----- mirL 21 158
-----TGGTTGACCATAGAACATGCGCT----- mirL 23 154
-----TGGTTGACCATAGAACAT----- mirL 18 152
-----GGTTGACCATAGAACATGC----- mirL 19 98
-----GGTTGACCATAGAACATGCG----- mirL 20 88
-----ATGGTTGACCATAGAACAT----- mirL 19 81
-----GTTGACCATAGAACATGCGC----- mirL 20 51

```

```

-----GTTGACCATAGAACATGC----- mirL 18 46
-----TTGACCATAGAACATGCG----- mirL 18 43
-----ATGGTTGACCATAGAACA----- mirL 18 42
-----GGTTGACCATAGAACATG----- mirL 18 39
-----GTTGACCATAGAACATGCG----- mirL 19 31
-----TTGACCATAGAACATGCGC----- mirL 19 23
-----ATGGTTGACCATAGAACATGCGCT----- mirL 24 23
-----GGTTGACCATAGAACATGCGCT----- mirL 22 14
-----TGGTTGACCATAGAACATGCGCTA----- mirL 24 7
-----TTGACCATAGAACATGCGCTAC----- mirL 22 4
-----GTTGACCATAGAACATGCGCT----- mirL 21 3
-----TTGACCATAGAACATGCGCTACT----- mirL 24 2
-----TTGACCATAGAACATGCGCT----- mirL 20 1
-----TTGACCATAGAACATGCGCTACT----- mirL 23 1
-----AGATGGTTGACCATAGAAC----- mirL 19 1
-----GATGGTTGACCATAGAACATGC----- mirL 22 1
-----GATGGTTGACCATAGAACATGCG----- mirL 23 1
-----TATGTAGTATGGTCCACATCT----- mirR 21 4556
-----TATGTAGTATGGTCCACATCTT----- mirR 22 1670
-----TATGTAGTATGGTCCACAT----- mirR 19 1065
-----TATGTAGTATGGTCCACATC----- mirR 20 546
-----TATGTAGTATGGTCCACATCTTC----- mirR 23 360
-----ATGTAGTATGGTCCACATCT----- mirR 20 280
-----ATGTAGTATGGTCCACATCTT----- mirR 21 192
-----TATGTAGTATGGTCCACA----- mirR 18 149
-----GTAGTATGGTCCACATCTT----- mirR 19 96
-----ATGTAGTATGGTCCACAT----- mirR 18 81
-----TGTAGTATGGTCCACATCTT----- mirR 20 51
-----ATGTAGTATGGTCCACATC----- mirR 19 36
-----ATGTAGTATGGTCCACATCTTC----- mirR 22 33
-----TATGTAGTATGGTCCACATCTTCT----- mirR 24 26
-----GTAGTATGGTCCACATCT----- mirR 18 22
-----TGTAGTATGGTCCACATCT----- mirR 19 22
-----GTAGTATGGTCCACATCTTC----- mirR 20 5
-----TGTAGTATGGTCCACATC----- mirR 18 4
-----TGTAGTATGGTCCACATCTTC----- mirR 21 3
-----GTATGTAGTATGGTCCACATCT----- mirR 22 2
-----ATGTAGTATGGTCCACATCTTCT----- mirR 24 2
-----TGTAGTATGGTCCACATCTTCT----- mirR 22 2
-----GTAGTATGGTCCACATCTTCT----- mirR 21 1
-----GTATGTAGTATGGTCCACAT----- mirR 20 1
-----ATGTAGTATGGTCCACATCTTCT----- mirR 23 1
-----TTCTCGTTATCAAAGTCA----- morR 18 2
-----TCTTCTCGTTATCAAAGTC----- morR 19 1
-----CTTCTCGTTATCAAAGTC----- morR 18 1
-----CGTTATCAAAGTCATTCGT----- morR 19 1

```

```

-----TCTTCTCGTTATCAAAGT----- morR 18 1

>mmu-mir-135b
CCCTCCGCTCTGCTGTGGCCTATGGCTTTTCATTCCCTATGTGATTGCTGCTCCGAACTCATGTAGGGCTAAAAGCCATGGGCTACAGTGAGGGGCAAGCTCC species len reads
CCCTCCGCTCTGCTGTG----- morL 18 2
---CTCCGCTCTGCTGTGGC----- morL 18 1
-----TATGGCTTTTCATTCCCTATGT----- mirL 21 7596
-----TATGGCTTTTCATTCCCTATGTGA----- mirL 23 2594
-----TATGGCTTTTCATTCCCTATGTG----- mirL 22 1890
-----TATGGCTTTTCATTCCCTATG----- mirL 20 1342
-----TATGGCTTTTCATTCCCTAT----- mirL 19 524
-----ATGGCTTTTCATTCCCTATGT----- mirL 20 256
-----TATGGCTTTTCATTCCCTA----- mirL 18 204
-----TATGGCTTTTCATTCCCTATGTGAT----- mirL 24 131
-----ATGGCTTTTCATTCCCTATGTGA----- mirL 22 86
-----ATGGCTTTTCATTCCCTATGTG----- mirL 21 68
-----ATGGCTTTTCATTCCCTATG----- mirL 19 62
-----TGGCTTTTCATTCCCTATGT----- mirL 19 43
-----ATGGCTTTTCATTCCCTAT----- mirL 18 31
-----GGCTTTTCATTCCCTATGT----- mirL 18 29
-----TGGCTTTTCATTCCCTATG----- mirL 18 21
-----CTATGGCTTTTCATTCCCTATGT----- mirL 22 17
-----GGCTTTTCATTCCCTATGTG----- mirL 19 10
-----TGGCTTTTCATTCCCTATGTG----- mirL 20 9
-----CCTATGGCTTTTCATTCCCTATG----- mirL 22 5
-----ATGGCTTTTCATTCCCTATGTGAT----- mirL 23 3
-----ATGGCTTTTCATTCCCTATGTGATT----- mirL 24 3
-----GGCTTTTCATTCCCTATGTGA----- mirL 20 3
-----TGGCTTTTCATTCCCTATGTGA----- mirL 21 2
-----CCTATGGCTTTTCATTCCCTATGT----- mirL 23 1
-----CTATGGCTTTTCATTCCCTA----- mirL 19 1
-----CTATGGCTTTTCATTCCCTATGTGA----- mirL 24 1
-----CTATGGCTTTTCATTCCCTATG----- mirL 21 1
-----TGATTGCTGCTCCGAACTC----- loop 19 5
-----TGATTGCTGCTCCGAACT----- loop 18 2
-----TGATTGCTGCTCCGAACTCAT----- loop 21 1
-----TTGCTGCTCCGAACTCATG----- loop 19 1
-----ATGTAGGGCTAAAAGCCATGGGC----- mirR 23 76
-----ATGTAGGGCTAAAAGCCATG----- mirR 20 36
-----ATGTAGGGCTAAAAGCCATGGG----- mirR 22 20
-----ATGTAGGGCTAAAAGCCAT----- mirR 19 15
-----TGTAGGGCTAAAAGCCATGGGC----- mirR 22 13
-----ATGTAGGGCTAAAAGCCATGGGCT----- mirR 24 9
-----ATGTAGGGCTAAAAGCCATGG----- mirR 21 7
-----GTAGGGCTAAAAGCCATG----- mirR 18 5
-----TGTAGGGCTAAAAGCCATG----- mirR 19 4

```



```

-----ATGTAGGGCTAAAAGCCA----- mirR 18 4
-----TGTAGGGCTAAAAGCCATGGG----- mirR 21 3
-----TGTAGGGCTAAAAGCCATGGGCT----- mirR 23 2
-----TAGGGCTAAAAGCCATGGGC----- mirR 20 2
-----CATGTAGGGCTAAAAGCCATGGGC----- mirR 24 1
-----TAGGGCTAAAAGCCATGGGCT----- mirR 21 1
-----GTAGGGCTAAAAGCCATGGGC----- mirR 21 1
-----GTAGGGCTAAAAGCCATGGGCTACA----- mirR 25 1
-----TAGGGCTAAAAGCCATGGGCTACA----- mirR 24 1
-----CTCATGTAGGGCTAAAAG----- mirR 18 1
-----ACAGTGAGGGGCAAGCTCC morR 19 1
-----CAGTGAGGGGCAAGCTCC morR 18 1

```

>mmu-mir-505

```

AATTGATGCACCCAGTGGGGGAGCCAGGAAGTATTGATGTTTCTGCCAGGTTAGCGTCAACACTTGCTGGTTTTCTCTCTGGAGTATCACCAAGTTCG species len reads
AATTGATGCACCCAGTGGG----- morL 19 1
-----GGGAGCCAGGAAGTATTGATGT----- mirL 22 1036
-----GGGAGCCAGGAAGTATTGATGTT----- mirL 23 842
-----GGGAGCCAGGAAGTATTGA----- mirL 19 194
-----GGGAGCCAGGAAGTATTGATG----- mirL 21 148
-----GGGAGCCAGGAAGTATTG----- mirL 18 115
-----GGGAGCCAGGAAGTATTGATGTT----- mirL 24 84
-----GGGAGCCAGGAAGTATTGAT----- mirL 20 79
-----AGCCAGGAAGTATTGATGT----- mirL 19 44
-----GAGCCAGGAAGTATTGATGT----- mirL 20 34
-----GAGCCAGGAAGTATTGATG----- mirL 19 18
-----GGAGCCAGGAAGTATTGATGT----- mirL 21 15
-----AGCCAGGAAGTATTGATG----- mirL 18 11
-----AGCCAGGAAGTATTGATGTT----- mirL 20 6
-----GAGCCAGGAAGTATTGATGTT----- mirL 21 4
-----GGGAGCCAGGAAGTATTGATGT----- mirL 23 3
-----GGAGCCAGGAAGTATTGATGTT----- mirL 22 3
-----GGGAGCCAGGAAGTATTGATG----- mirL 22 3
-----GGAGCCAGGAAGTATTGA----- mirL 18 2
-----GGAGCCAGGAAGTATTGATG----- mirL 20 2
-----GAGCCAGGAAGTATTGAT----- mirL 18 2
-----GGGAGCCAGGAAGTATT----- mirL 18 1
-----GGGAGCCAGGAAGTATTG----- mirL 19 1
-----CGTCAACACTTGCTGGTTTTCTCT----- mirR 24 4377
-----CGTCAACACTTGCTGGTTTTCT----- mirR 22 2536
-----CGTCAACACTTGCTGGTTTTCT----- mirR 21 1147
-----GTCAACACTTGCTGGTTTTCTC----- mirR 22 713
-----CGTCAACACTTGCTGGTTTTCTC----- mirR 23 672
-----CGTCAACACTTGCTGGTTTT----- mirR 20 617
-----GTCAACACTTGCTGGTTTTC----- mirR 20 526
-----CGTCAACACTTGCTGGTTTTCTC----- mirR 25 438

```

```

-----GTCAACACTTGCTGGTTTTCT----- mirR 21 289
-----CGTCAACACTTGCTGGTT----- mirR 18 279
-----GTCAACACTTGCTGGTTTTCTCT----- mirR 23 230
-----GTCAACACTTGCTGGTTTT----- mirR 19 196
-----GTCAACACTTGCTGGTTT----- mirR 18 105
-----TCAACACTTGCTGGTTTTCTCT----- mirR 22 64
-----GTCAACACTTGCTGGTTTTCTCTC----- mirR 24 39
-----TCAACACTTGCTGGTTTTCT----- mirR 20 38
-----TCAACACTTGCTGGTTTTCTCTC----- mirR 23 37
-----TCAACACTTGCTGGTTTTCTC----- mirR 21 26
-----TCAACACTTGCTGGTTTTCT----- mirR 19 20
-----TCAACACTTGCTGGTTTTCTCTCT----- mirR 24 11
-----CAACACTTGCTGGTTTTCT----- mirR 19 10
-----TCAACACTTGCTGGTTTT----- mirR 18 8
-----CAACACTTGCTGGTTTTCTCT----- mirR 21 7
-----CAACACTTGCTGGTTTTCT----- mirR 18 4
-----GCGTCAACACTTGCTGGTTTTCT----- mirR 22 1
-----AGCGTCAACACTTGCTGGTT----- mirR 21 1
-----AGCGTCAACACTTGCTGGTTTT----- mirR 22 1
-----TAGCGTCAACACTTGCTGGTT----- mirR 22 1
-----GGAGTATCACCAAGTTCG morR 18 2
-----TGGAGTATCACCAAGTTC- morR 18 1
-----CTGGAGTATCACCAAGTT-- morR 18 1

```

>mmu-mir-463

```

AGGTATGATGTACCCTGCTTTACCTAATTTGTTGTCCATCATGTAAACATAAATGATGATAGACACCATATAAGGTAGAGGAAGGTTCACTATGTTCA species len reads
--GTATGATGTACCCTGCTT----- morL 18 1
AGGTATGATGTACCCTGC----- morL 18 1
-----TACCTAATTTGTTGTCCATCA----- mirL 21 8488
-----TACCTAATTTGTTGTCCATCAT----- mirL 22 2088
-----TACCTAATTTGTTGTCCAT----- mirL 19 1662
-----TACCTAATTTGTTGTCCA----- mirL 18 589
-----TACCTAATTTGTTGTCCATC----- mirL 20 557
-----ACCTAATTTGTTGTCCATCA----- mirL 20 352
-----TACCTAATTTGTTGTCCATCATG----- mirL 23 160
-----ACCTAATTTGTTGTCCATCAT----- mirL 21 155
-----CCTAATTTGTTGTCCATCA----- mirL 19 151
-----ACCTAATTTGTTGTCCAT----- mirL 18 120
-----CTAATTTGTTGTCCATCA----- mirL 18 64
-----ACCTAATTTGTTGTCCATC----- mirL 19 43
-----CCTAATTTGTTGTCCATCAT----- mirL 20 38
-----CCTAATTTGTTGTCCATC----- mirL 18 36
-----TTACCTAATTTGTTGTCCATCA----- mirL 22 15
-----CTAATTTGTTGTCCATCAT----- mirL 19 15
-----TACCTAATTTGTTGTCCATCATGT----- mirL 24 12
-----ACCTAATTTGTTGTCCATCATG----- mirL 22 10

```

```

-----TTACCTAATTTGTTGTCCA----- mirL 19 2
-----CTAATTTGTTGTCCATCATG----- mirL 20 1
-----TTACCTAATTTGTTGTCC----- mirL 18 1
-----CCTAATTTGTTGTCCATCATG----- mirL 21 1
-----TTACCTAATTTGTTGTCCAT----- mirL 20 1
-----CTTTACCTAATTTGTTGTC----- mirL 19 1
-----TTACCTAATTTGTTGTCCATCAT----- mirL 23 1
-----TCATGTAAAACATAAATGAT----- loop 20 1
-----TGATAGACACCATATAAGGTAG----- mirR 22 232
-----GATAGACACCATATAAGGTAG----- mirR 21 53
-----TGATAGACACCATATAAGGTA----- mirR 21 44
-----TGATAGACACCATATAAGGTAGA----- mirR 23 38
-----ATAGACACCATATAAGGTAG----- mirR 20 12
-----TAGACACCATATAAGGTAG----- mirR 19 11
-----GATAGACACCATATAAGGTAGA----- mirR 22 11
-----GATAGACACCATATAAGGTA----- mirR 20 7
-----TGATAGACACCATATAAG----- mirR 18 6
-----TGATAGACACCATATAAGGTAGAG----- mirR 24 3
-----TAGACACCATATAAGGTAGA----- mirR 20 2
-----GATAGACACCATATAAGGT----- mirR 19 1
-----TGATAGACACCATATAAGGT----- mirR 20 1
-----GATAGACACCATATAAGG----- mirR 18 1
-----TGATAGACACCATATAAGG----- mirR 19 1
-----GAAGGTTCACTATGTTCA morR 18 1

```

>mmu-mir-873

```

TAAAATCAGTTTGTGTGCATTTGCAGGAACCTGTGAGTCTCCTATTGAAAATAGACAGGAGACTGACAAGTTCCTCGGGAACACCCACAAATCTTCCTA species len reads
---AATCAGTTTGTGTGCATT----- morL 18 2
---AAAATCAGTTTGTGTGCATT----- morL 20 1
TAAAATCAGTTTGTGTGCAT----- morL 20 1
----TCAGTTTGTGTGCATTTG----- morL 18 1
---AATCAGTTTGTGTGCATTT----- morL 19 1
-----GCAGGAACCTGTGAGTCTCCT----- mirL 21 3366
-----GCAGGAACCTGTGAGTCTCCTA----- mirL 22 2991
-----TGCAGGAACCTGTGAGTCTCCT----- mirL 22 1189
-----GCAGGAACCTGTGAGTCTCCTAT----- mirL 23 1159
-----TGCAGGAACCTGTGAGTCT----- mirL 19 859
-----TGCAGGAACCTGTGAGTCTCCTA----- mirL 23 692
-----TGCAGGAACCTGTGAGTCTCC----- mirL 21 567
-----GCAGGAACCTGTGAGTCTCC----- mirL 20 486
-----TGCAGGAACCTGTGAGTCTC----- mirL 20 400
-----GCAGGAACCTGTGAGTCTC----- mirL 19 350
-----GCAGGAACCTGTGAGTCT----- mirL 18 277
-----GCAGGAACCTGTGAGTCTCCTATT----- mirL 24 196
-----TGCAGGAACCTGTGAGTCTCCTAT----- mirL 24 189
-----TGCAGGAACCTGTGAGTC----- mirL 18 96

```

```

-----GGAACTTGTGAGTCTCCT----- mirL 18 60
-----GGAACTTGTGAGTCTCCTA----- mirL 19 24
-----AGGAACTTGTGAGTCTCCT----- mirL 19 11
-----CAGGAACTTGTGAGTCTCCT----- mirL 20 4
-----TTGCAGGAACTTGTGAGTCTCCT----- mirL 23 4
-----CAGGAACTTGTGAGTCTCCTA----- mirL 21 3
-----CAGGAACTTGTGAGTCTC----- mirL 18 3
-----AGGAACTTGTGAGTCTCCTA----- mirL 20 2
-----CAGGAACTTGTGAGTCTCCTAT----- mirL 22 1
-----TTGCAGGAACTTGTGAGTCTCCTAT----- mirL 25 1
-----AGGAACTTGTGAGTCTC----- mirL 18 1
-----GAGACTGACAAGTTCCCGGGA----- mirR 21 647
-----GAGACTGACAAGTTCCCGGGAAC----- mirR 23 344
-----GAGACTGACAAGTTCCCGGGA----- mirR 22 258
-----GAGACTGACAAGTTCCCGGG----- mirR 20 212
-----GAGACTGACAAGTTCCCGG----- mirR 19 92
-----GGAGACTGACAAGTTCCCGGGA----- mirR 22 34
-----AGACTGACAAGTTCCCGGGAAC----- mirR 22 24
-----GAGACTGACAAGTTCCCGGGAACA----- mirR 24 12
-----AGACTGACAAGTTCCCGGGA----- mirR 20 12
-----GAGACTGACAAGTTCCCG----- mirR 18 9
-----AGACTGACAAGTTCCCGGGAACA----- mirR 23 8
-----AGACTGACAAGTTCCCGGGA----- mirR 21 7
-----AGACTGACAAGTTCCCGGG----- mirR 19 7
-----GGAGACTGACAAGTTCCCGGG----- mirR 21 5
-----GGAGACTGACAAGTTCCCGGGAAC----- mirR 24 4
-----GGAGACTGACAAGTTCCC----- mirR 18 4
-----AGGAGACTGACAAGTTCCCGG----- mirR 21 4
-----CAGGAGACTGACAAGTTCCCGGG----- mirR 23 4
-----AGACTGACAAGTTCCCGGGAACAC----- mirR 24 4
-----GGAGACTGACAAGTTCCCGGGA----- mirR 23 3
-----GGAGACTGACAAGTTCCCG----- mirR 19 3
-----GGAGACTGACAAGTTCCCGG----- mirR 20 2
-----CAGGAGACTGACAAGTTC----- mirR 18 2
-----CAGGAGACTGACAAGTTCCC----- mirR 20 1
-----CAGGAGACTGACAAGTTCCCGGGA----- mirR 24 1
-----AGGAGACTGACAAGTTCCC----- mirR 19 1
-----AGACTGACAAGTTCCCGGGAACACC----- mirR 25 1
-----CAGGAGACTGACAAGTTCCCGG----- mirR 22 1
-----GACTGACAAGTTCCCGGGA----- mirR 20 1
-----ACACCCACAAATCTTCCT----- morR 18 1
-----AACACCCACAAATCTTCC----- morR 18 1
-----GAACACCCACAAATCTTC----- morR 18 1
-----CACCCACAAATCTTCTTA----- morR 18 1

```

>mmu-mir-134

|                                                                                                           | species | len | reads |
|-----------------------------------------------------------------------------------------------------------|---------|-----|-------|
| TGCCAGCACCATT CAGGGTGTGTGACTGGTTGACCAGAGGGGGCGTGCACCTCTGTTACCCCTGTGGGCCACCTAGTCACCAACCCTCAGCATCAATTCCACTC | morL    | 19  | 220   |
| ----AGCACCATT CAGGGTGTGT-----                                                                             | morL    | 18  | 79    |
| ----AGCACCATT CAGGGTGTGT-----                                                                             | morL    | 18  | 79    |
| ---CAGCACCATT CAGGGTGTGT-----                                                                             | morL    | 20  | 54    |
| ---CAGCACCATT CAGGGTGTGT-----                                                                             | morL    | 18  | 35    |
| ---CAGCACCATT CAGGGTGTGT-----                                                                             | morL    | 19  | 34    |
| ----GCACCATT CAGGGTGTGT-----                                                                              | morL    | 18  | 4     |
| --CCAGCACCATT CAGGGTGT-----                                                                               | morL    | 19  | 2     |
| TGCCAGCACCATT CAGGG-----                                                                                  | morL    | 18  | 2     |
| --CCAGCACCATT CAGGGTGTGT-----                                                                             | morL    | 21  | 2     |
| --CCAGCACCATT CAGGGTGTGT-----                                                                             | morL    | 20  | 2     |
| -GCCAGCACCATT CAGGGT-----                                                                                 | morL    | 18  | 1     |
| --CCAGCACCATT CAGGGTGT-----                                                                               | morL    | 18  | 1     |
| -----TGTGACTGGTTGACCAGAGGGGC-----                                                                         | mirL    | 23  | 3402  |
| -----TGTGACTGGTTGACCAGAGG-----                                                                            | mirL    | 20  | 1931  |
| -----TGTGACTGGTTGACCAGAGGG-----                                                                           | mirL    | 21  | 1885  |
| -----TGTGACTGGTTGACCAGAGGGG-----                                                                          | mirL    | 22  | 1761  |
| -----TGTGACTGGTTGACCAGAG-----                                                                             | mirL    | 19  | 622   |
| -----TGTGACTGGTTGACCAGAGGGGCG-----                                                                        | mirL    | 24  | 470   |
| -----TGTGACTGGTTGACCAGA-----                                                                              | mirL    | 18  | 389   |
| -----GTGACTGGTTGACCAGAGGGGC-----                                                                          | mirL    | 22  | 181   |
| -----GTGACTGGTTGACCAGAGGG-----                                                                            | mirL    | 20  | 90    |
| -----GTGACTGGTTGACCAGAGGGG-----                                                                           | mirL    | 21  | 77    |
| -----GTGACTGGTTGACCAGAGG-----                                                                             | mirL    | 19  | 58    |
| -----GTGTGACTGGTTGACC-----                                                                                | mirL    | 18  | 37    |
| -----GTGACTGGTTGACCAGAG-----                                                                              | mirL    | 18  | 33    |
| -----GTGACTGGTTGACCAGAGGGGCG-----                                                                         | mirL    | 23  | 27    |
| -----GTGTGACTGGTTGACCAGAGGG-----                                                                          | mirL    | 22  | 23    |
| -----GACTGGTTGACCAGAGGG-----                                                                              | mirL    | 18  | 16    |
| -----GTGTGACTGGTTGACCAGAGGGGC-----                                                                        | mirL    | 24  | 11    |
| -----GTGTGACTGGTTGACCAGAGG-----                                                                           | mirL    | 21  | 10    |
| -----GACTGGTTGACCAGAGGGG-----                                                                             | mirL    | 19  | 7     |
| -----GTGTGACTGGTTGACCAGAG-----                                                                            | mirL    | 20  | 6     |
| -----GTGACTGGTTGACCAGAGGGGCGT-----                                                                        | mirL    | 24  | 6     |
| -----TGACTGGTTGACCAGAGGG-----                                                                             | mirL    | 19  | 5     |
| -----GTGTGACTGGTTGACCAGA-----                                                                             | mirL    | 19  | 4     |
| -----GTGTGACTGGTTGACCAGAGGGG-----                                                                         | mirL    | 23  | 3     |
| -----TGACTGGTTGACCAGAGGGG-----                                                                            | mirL    | 20  | 3     |
| -----TGACTGGTTGACCAGAGG-----                                                                              | mirL    | 18  | 2     |
| -----TGTGTGACTGGTTGACCA-----                                                                              | mirL    | 18  | 1     |
| -----TGACTGGTTGACCAGAGGGGCG-----                                                                          | mirL    | 22  | 1     |
| -----CGTGCACTCTGTTACCCCT-----                                                                             | loop    | 19  | 2     |
| -----CTGTGGGCCACCTAGTCACCA-----                                                                           | mirR    | 21  | 812   |
| -----CTGTGGGCCACCTAGTCACCAA-----                                                                          | mirR    | 22  | 599   |
| -----CTGTGGGCCACCTAGTCACCAAC-----                                                                         | mirR    | 23  | 437   |
| -----CTGTGGGCCACCTAGTCACC-----                                                                            | mirR    | 20  | 392   |

```

-----CTGTGGGCCACCTAGTCAC----- mirR 19 232
-----TGTGGGCCACCTAGTCACCAA----- mirR 21 76
-----TGTGGGCCACCTAGTCACCAAC----- mirR 22 68
-----TGTGGGCCACCTAGTCACCA----- mirR 20 42
-----CTGTGGGCCACCTAGTCA----- mirR 18 30
-----CCTGTGGGCCACCTAGTCACCA----- mirR 22 27
-----CTGTGGGCCACCTAGTCACCAACC----- mirR 24 26
-----CCTGTGGGCCACCTAGTCACCAA----- mirR 23 23
-----TGTGGGCCACCTAGTCACCAACC----- mirR 23 21
-----TGTGGGCCACCTAGTCACC----- mirR 19 15
-----CCTGTGGGCCACCTAGTCAC----- mirR 20 12
-----CCTGTGGGCCACCTAGTCACC----- mirR 21 11
-----CCTGTGGGCCACCTAGTCACCAACC----- mirR 25 5
-----TGTGGGCCACCTAGTCAC----- mirR 18 4
-----GTGGGCCACCTAGTCACCA----- mirR 19 3
-----CCCTGTGGGCCACCTAGTCACC----- mirR 22 2
-----CCCTGTGGGCCACCTAGTCA----- mirR 20 1
-----GTGGGCCACCTAGTCACC----- mirR 18 1
-----GTGGGCCACCTAGTCACCAAC----- mirR 21 1
-----CCTGTGGGCCACCTAGTCACCAACC----- mirR 26 1
-----GTGGGCCACCTAGTCACCAA----- mirR 20 1
-----CCTGTGGGCCACCTAGTC----- mirR 18 1
-----CCCTGTGGGCCACCTAGTCACCA----- mirR 23 1
-----CTCAGCATCAATTCCACTC morR 19 1
-----CCCTCAGCATCAATTCCA--- morR 18 1
-----CCTCAGCATCAATTCCACTC morR 20 1

```

>mmu-mir-501

```

TCTGCTCTGCTCATCCTCTCTAATCCTTTGTCCCTGGGTGAAAATGCTATTTGTATGCAATGCACCCGGGCAAGGATTGGGG species len reads
--TGCTCTGCTCATCCTCTCT----- morL 19 2
----TCTGCTCATCCTCTCTAA----- morL 18 1
--GCTCTGCTCATCCTCTCT----- morL 18 1
TCTGCTCTGCTCATCCTCT----- morL 19 1
-----AATCCTTTGTCCCTGGGTGAAA----- mirL 22 3633
-----AATCCTTTGTCCCTGGGTGA----- mirL 20 2192
-----AATCCTTTGTCCCTGGGTGAAA----- mirL 21 1598
-----AATCCTTTGTCCCTGGGTGAAAA----- mirL 23 862
-----AATCCTTTGTCCCTGGGTGAAAATGC----- mirL 26 416
-----AATCCTTTGTCCCTGGGTG----- mirL 19 267
-----AATCCTTTGTCCCTGGGTGAAAAT----- mirL 24 207
-----ATCCTTTGTCCCTGGGTGAAA----- mirL 21 69
-----TCCTTTGTCCCTGGGTGAAA----- mirL 20 49
-----ATCCTTTGTCCCTGGGTGAAA----- mirL 20 26
-----ATCCTTTGTCCCTGGGTGAAAA----- mirL 22 22
-----CCTTTGTCCCTGGGTGAAA----- mirL 19 16
-----ATCCTTTGTCCCTGGGTGA----- mirL 19 15

```

```

-----TCCTTTGTCCCTGGGTGAAAA----- mirL 21 9
-----ATCCTTTGTCCCTGGGTG----- mirL 18 7
-----TCCTTTGTCCCTGGGTGAA----- mirL 19 7
-----TCCTTTGTCCCTGGGTGA----- mirL 18 6
-----CCTTTGTCCCTGGGTGAA----- mirL 18 5
-----CCTTTGTCCCTGGGTGAAAA----- mirL 20 3
-----TAATCCTTTGTCCCTGGGTGAA----- mirL 22 2
-----CTAATCCTTTGTCCCTGGGTGAAAAT----- mirL 26 2
-----TAATCCTTTGTCCCTGGGTGAAA----- mirL 23 2
-----TAATCCTTTGTCCCTGGGTGAAAA----- mirL 24 1
-----TCTAATCCTTTGTCCCTG----- mirL 18 1
-----TCCTTTGTCCCTGGGTGAAAAT----- mirL 22 1
-----ATCCTTTGTCCCTGGGTGAAAAT----- mirL 23 1
-----ATCCTTTGTCCCTGGGTGAAAATGC----- mirL 25 1
-----TAATCCTTTGTCCCTGGGTGA----- mirL 21 1
-----AAAATGCTATTTGTATGC----- loop 18 1
-----AAAATGCTATTTGTATGCA----- loop 19 1
-----AATGCACCCGGGCAAGGATTG--- mirR 22 2198
-----AATGCACCCGGGCAAGGATTT--- mirR 21 1312
-----AATGCACCCGGGCAAGGATTGG--- mirR 23 409
-----AATGCACCCGGGCAAGGATT--- mirR 20 330
-----AATGCACCCGGGCAAGGAT--- mirR 19 146
-----AATGCACCCGGGCAAGGA----- mirR 18 66
-----AATGCACCCGGGCAAGGATTGGG--- mirR 24 53
-----ATGCACCCGGGCAAGGATTG--- mirR 21 32
-----GCACCCGGGCAAGGATTG--- mirR 19 31
-----ATGCACCCGGGCAAGGATTT--- mirR 20 17
-----TGCACCCGGGCAAGGATTG--- mirR 20 17
-----ATGCACCCGGGCAAGGATT--- mirR 19 8
-----TGCACCCGGGCAAGGATTT--- mirR 19 8
-----TGCACCCGGGCAAGGATT--- mirR 18 4
-----ATGCACCCGGGCAAGGATTGG--- mirR 22 4
-----GCACCCGGGCAAGGATTT--- mirR 18 3
-----TGCACCCGGGCAAGGATTGG--- mirR 21 2
-----ATGCACCCGGGCAAGGAT--- mirR 18 2
-----TGCACCCGGGCAAGGATTGGGG--- mirR 23 1
-----TGCACCCGGGCAAGGATTGGG--- mirR 22 1
-----CAATGCACCCGGGCAAGGATTG--- mirR 23 1

>mmu-mir-219-1
TCCCGGGCCGCGGCTCCTGATTGTCCAAACGCAATTCTCGAGTCTCTGGCTCCGGCCGAGAGTTGCGTCTGGACGTCCCGAGCCGCCGCCCAACCTCG species len reads
TCCCGGGCCGCGGCTCCT----- morL 18 2
-CCCGGGCCGCGGCTCCTG----- morL 18 1
-----TGATTGTCCAAACGCAATTCT----- mirL 21 3791
-----TGATTGTCCAAACGCAATTC----- mirL 20 1670
-----TGATTGTCCAAACGCAATT----- mirL 19 1496

```

```

-----TGATTGTCCAAACGCAATTCTC----- mirL 22 1253
-----TGATTGTCCAAACGCAATTCTCG----- mirL 23 966
-----TGATTGTCCAAACGCAAT----- mirL 18 645
-----TGATTGTCCAAACGCAATTCTCGA----- mirL 24 319
-----GATTGTCCAAACGCAATTCT----- mirL 20 217
-----GATTGTCCAAACGCAATT----- mirL 18 124
-----GATTGTCCAAACGCAATTC----- mirL 19 100
-----GATTGTCCAAACGCAATTCTC----- mirL 21 87
-----GATTGTCCAAACGCAATTCTCG----- mirL 22 73
-----GATTGTCCAAACGCAATTCTCGA----- mirL 23 26
-----TTGTCCAAACGCAATTCT----- mirL 18 10
-----GATTGTCCAAACGCAATTCTCGAG----- mirL 24 10
-----ATTGTCCAAACGCAATTCT----- mirL 19 3
-----ATTGTCCAAACGCAATTCTC----- mirL 20 2
-----TTGTCCAAACGCAATTCTC----- mirL 19 2
-----ATTGTCCAAACGCAATTC----- mirL 18 1
-----AGAGTTGCGTCTGGACGTCCCG----- mirR 22 2686
-----AGAGTTGCGTCTGGACGTCCCGA----- mirR 23 145
-----AGAGTTGCGTCTGGACGTCC----- mirR 20 138
-----AGAGTTGCGTCTGGACGTCCC----- mirR 21 101
-----AGTTGCGTCTGGACGTCCCG----- mirR 20 54
-----AGAGTTGCGTCTGGACGTCT----- mirR 19 31
-----AGAGTTGCGTCTGGACGTCCCGAG----- mirR 24 25
-----GAGTTGCGTCTGGACGTCCCG----- mirR 21 21
-----GTTGCGTCTGGACGTCCCG----- mirR 19 19
-----GTTGCGTCTGGACGTCCC----- mirR 18 10
-----GAGAGTTGCGTCTGGACGTCCCG----- mirR 23 9
-----AGAGTTGCGTCTGGACGT----- mirR 18 8
-----AGTTGCGTCTGGACGTCC----- mirR 18 7
-----GAGTTGCGTCTGGACGTCCC----- mirR 20 3
-----AGTTGCGTCTGGACGTCCC----- mirR 19 3
-----GTTGCGTCTGGACGTCCCGA----- mirR 20 2
-----GAGTTGCGTCTGGACGTCCCGAG----- mirR 23 2
-----AGTTGCGTCTGGACGTCCCGA----- mirR 21 2
-----GAGAGTTGCGTCTGGACGTCCCGA----- mirR 24 1
-----GAGTTGCGTCTGGACGTCC----- mirR 19 1
-----GAGTTGCGTCTGGACGTCT----- mirR 18 1
-----GCCGCCGCCCCCAAACCT----- morR 18 3
-----CCGAGCCGCCGCCCCCAA----- morR 19 1
-----CGCCGCCCCCAAACCTCG----- morR 18 1
-----AGCCGCCGCCCCCAAACC----- morR 18 1

>mmu-mir-455
GCTGCCCTCCCTGGTGTGAGCGTATGTGCCTTTGGACTACATCGTGAACGCAGCACCATGCAGTCCACGGGCATATACACTTGCTCAAGGTCTATGTCATCGA species len reads
-----TCCCTGGTGTGAGCGTAT----- morL 18 54
GCTGCCCTCCCTGGTGTGAG----- morL 20 1

```



```

-----TATGTGCCTTTGGACTACATCG----- mirL 22 959
-----TATGTGCCTTTGGACTACATC----- mirL 21 266
-----TATGTGCCTTTGGACTACAT----- mirL 20 174
-----TATGTGCCTTTGGACTACATCGT----- mirL 23 140
-----TATGTGCCTTTGGACTACA----- mirL 19 116
-----ATGTGCCTTTGGACTACATCG----- mirL 21 63
-----TATGTGCCTTTGGACTAC----- mirL 18 54
-----TATGTGCCTTTGGACTACATCGTG----- mirL 24 46
-----ATGTGCCTTTGGACTACATC----- mirL 20 29
-----GTGCCTTTGGACTACATCG----- mirL 19 15
-----TGTGCCTTTGGACTACATCG----- mirL 20 15
-----ATGTGCCTTTGGACTACAT----- mirL 19 13
-----ATGTGCCTTTGGACTACATCGT----- mirL 22 12
-----TGTGCCTTTGGACTACATC----- mirL 19 11
-----GTGCCTTTGGACTACATC----- mirL 18 10
-----ATGTGCCTTTGGACTACA----- mirL 18 9
-----TGTGCCTTTGGACTACAT----- mirL 18 5
-----TGTGCCTTTGGACTACATCGT----- mirL 21 5
-----TGTGCCTTTGGACTACATCGTG----- mirL 22 3
-----GTATGTGCCTTTGGACTACAT----- mirL 21 2
-----ATGTGCCTTTGGACTACATCGTG----- mirL 23 2
-----GTGCCTTTGGACTACATCGT----- mirL 20 2
-----GTATGTGCCTTTGGACTACATCG----- mirL 23 2
-----GTATGTGCCTTTGGACTA----- mirL 18 2
-----GTATGTGCCTTTGGACTAC----- mirL 19 2
-----CGTATGTGCCTTTGGACTAC----- mirL 20 2
-----ATGTGCCTTTGGACTACATCGTGAA----- mirL 25 1
-----TGTGCCTTTGGACTACATCGTGA----- mirL 23 1
-----GTATGTGCCTTTGGACTACATCGT----- mirL 24 1
-----GCAGTCCACGGGCATATACT----- mirR 22 3135
-----GCAGTCCACGGGCATATACAC----- mirR 21 3098
-----GCAGTCCACGGGCATATACA----- mirR 20 1005
-----GCAGTCCACGGGCATATAC----- mirR 19 849
-----GCAGTCCACGGGCATATACTT----- mirR 23 737
-----CAGTCCACGGGCATATACTT----- mirR 22 454
-----ATGCAGTCCACGGGCATATACT----- mirR 24 360
-----CAGTCCACGGGCATATACT----- mirR 21 187
-----GCAGTCCACGGGCATATA----- mirR 18 180
-----CAGTCCACGGGCATATACAC----- mirR 20 162
-----TGCAGTCCACGGGCATATACAC----- mirR 22 160
-----ATGCAGTCCACGGGCATATACAC----- mirR 23 154
-----ATGCAGTCCACGGGCATATACTT----- mirR 25 139
-----GCAGTCCACGGGCATATACTTG----- mirR 24 132
-----ATGCAGTCCACGGGCATATAC----- mirR 21 132
-----CAGTCCACGGGCATATACTTG----- mirR 23 122
-----CAGTCCACGGGCATATACTTGCC----- mirR 25 112

```

```

-----ATGCAGTCCACGGGCATATACA----- mirR 22 102
-----CATGCAGTCCACGGGCATATACA----- mirR 22 93
-----AGTCCACGGGCATATACA----- mirR 18 72
-----AGTCCACGGGCATATACAC----- mirR 19 68
-----AGTCCACGGGCATATACACT----- mirR 20 60
-----GTCCACGGGCATATACAC----- mirR 18 45
-----CAGTCCACGGGCATATACA----- mirR 19 45
-----TGCAGTCCACGGGCATATACACT----- mirR 23 42
-----CAGTCCACGGGCATATAC----- mirR 18 41
-----ATGCAGTCCACGGGCATAT----- mirR 19 37
-----TGCAGTCCACGGGCATATAC----- mirR 20 36
-----ATGCAGTCCACGGGCATATA----- mirR 20 36
-----CATGCAGTCCACGGGCATATACAC----- mirR 24 33
-----TGCAGTCCACGGGCATATACA----- mirR 21 33
-----CATGCAGTCCACGGGCATAT----- mirR 20 26
-----GTCCACGGGCATATACACT----- mirR 19 23
-----CATGCAGTCCACGGGCATATA----- mirR 21 22
-----CATGCAGTCCACGGGCATATACA----- mirR 23 19
-----AGTCCACGGGCATATACACTT----- mirR 21 19
-----TGCAGTCCACGGGCATATACACTT----- mirR 24 18
-----TGCAGTCCACGGGCATAT----- mirR 18 9
-----TGCAGTCCACGGGCATATA----- mirR 19 7
-----AGTCCACGGGCATATACACTTG----- mirR 22 5
-----CATGCAGTCCACGGGCATA----- mirR 19 4
-----CATGCAGTCCACGGGCAT----- mirR 18 4
-----GTCCACGGGCATATACACTT----- mirR 20 4
-----CTCAAGGTCTATGTCATCGA morR 20 1
-----TTGCCTCAAGGTCTATGT----- morR 18 1
-----CTCAAGGTCTATGTCATC-- morR 18 1

>mmu-mir-203
CTGTGTGCAGGCGCGCCTGGTCCAGTGGTTCTTGACAGTTCAACAGTTCTGTAGCACAATTGTGAAATGTTTAGGACCACTAGACCCGGCGCGCACGGCGGCGA species len reads
---TGTGCAGGCGCGCCTGGT----- morL 19 25
CTGTGTGCAGGCGCGCCTGG----- morL 20 1
---TGTGCAGGCGCGCCTGGT----- morL 18 1
---TGTGCAGGCGCGCCTGGTCCA----- morL 21 1
-----AGTGGTTCTTGACAGTTCAACA----- mirL 22 150
-----AGTGGTTCTTGACAGTTCAAC----- mirL 21 58
-----GGTTCTTGACAGTTCAACA----- mirL 19 44
-----AGTGGTTCTTGACAGTTCAACAG----- mirL 23 42
-----AGTGGTTCTTGACAGTTCAA----- mirL 20 41
-----AGTGGTTCTTGACAGTTTC----- mirL 18 33
-----AGTGGTTCTTGACAGTTCA----- mirL 19 28
-----TGGTTCTTGACAGTTCAACA----- mirL 20 20
-----GTGGTTCTTGACAGTTCAACA----- mirL 21 15
-----AGTGGTTCTTGACAGTTCAACAGT----- mirL 24 14

```

```

-----GGTTCCTTGACAGTTCAACAG----- mirL 20 11
-----TGGTTCCTTGACAGTTCAACAG----- mirL 21 9
-----GTGGTTCCTTGACAGTTCAACAG----- mirL 22 7
-----GTGGTTCCTTGACAGTTCA----- mirL 18 3
-----GGTTCCTTGACAGTTCAACAGT----- mirL 21 3
-----GTGGTTCCTTGACAGTTCAA----- mirL 19 2
-----TGGTTCCTTGACAGTTCAACAGT----- mirL 22 2
-----GTGGTTCCTTGACAGTTCAACAGT----- mirL 23 2
-----TGGTTCCTTGACAGTTCAA----- mirL 18 2
-----GTGGTTCCTTGACAGTTCAAC----- mirL 20 1
-----GGTTCCTTGACAGTTCAAC----- mirL 18 1
-----CAGTGGTTCCTTGACAGTTCAAC----- mirL 22 1
-----TGGTTCCTTGACAGTTCAAC----- mirL 19 1
-----TCCAGTGGTTCCTTGACAGT----- mirL 19 1
-----GTTCTGTAGCACAAATTGTG----- loop 19 1
-----GTGAAATGTTTAGGACCACTAG----- mirR 22 4793
-----TGAAATGTTTAGGACCACTAG----- mirR 21 2358
-----GTGAAATGTTTAGGACCACTA----- mirR 21 2192
-----TGAAATGTTTAGGACCACTA----- mirR 20 858
-----GTGAAATGTTTAGGACCACT----- mirR 20 716
-----GTGAAATGTTTAGGACCAC----- mirR 19 467
-----GTGAAATGTTTAGGACCACTAGA----- mirR 23 433
-----GTGAAATGTTTAGGACCA----- mirR 18 316
-----TGAAATGTTTAGGACCACTAGA----- mirR 22 292
-----GAAATGTTTAGGACCACTAG----- mirR 20 209
-----TGAAATGTTTAGGACCACT----- mirR 19 200
-----TGAAATGTTTAGGACCACTAGAC----- mirR 23 103
-----TGAAATGTTTAGGACCAC----- mirR 18 82
-----GAAATGTTTAGGACCACTA----- mirR 19 79
-----GTGAAATGTTTAGGACCACTAGACC----- mirR 25 68
-----GAAATGTTTAGGACCACTAGA----- mirR 21 31
-----TGTGAAATGTTTAGGACCACTAG----- mirR 23 28
-----AAATGTTTAGGACCACTAG----- mirR 19 27
-----AAATGTTTAGGACCACTA----- mirR 18 25
-----GAAATGTTTAGGACCACT----- mirR 18 22
-----TGAAATGTTTAGGACCACTAGACC----- mirR 24 19
-----TGTGAAATGTTTAGGACCACTA----- mirR 22 17
-----TGTGAAATGTTTAGGACCACT----- mirR 21 7
-----GAAATGTTTAGGACCACTAGAC----- mirR 22 6
-----TGTGAAATGTTTAGGACCAC----- mirR 20 5
-----TGTGAAATGTTTAGGACC----- mirR 18 5
-----TTGTGAAATGTTTAGGACCACT----- mirR 22 4
-----TTGTGAAATGTTTAGGACCAC----- mirR 21 2
-----TTGTGAAATGTTTAGGACCACTA----- mirR 23 2
-----GAAATGTTTAGGACCACTAGACC----- mirR 23 1
-----TTGTGAAATGTTTAGGACCACTAG----- mirR 24 1

```

-----TGTGAAATGTTTAGGACCA----- mirR 19 1  
-----TGTGAAATGTTTAGGACCACTAGA----- mirR 24 1  
-----GAAATGTTTAGGACCACTAGACCCGGC----- mirR 27 1  
-----ACCCGGCGCGCACGGCGCGCA morR 21 1

>mmu-mir-702

| Species | len  | rea |
|---------|------|-----|
| mirL 22 | 12   |     |
| mirL 23 | 5    |     |
| mirL 24 | 4    |     |
| mirL 21 | 3    |     |
| mirL 20 | 3    |     |
| mirL 18 | 1    |     |
| mirL 20 | 1    |     |
| mirL 18 | 1    |     |
| mirR 22 | 4642 |     |
| mirR 25 | 2222 |     |
| mirR 24 | 2039 |     |
| mirR 23 | 1560 |     |
| mirR 21 | 1032 |     |
| mirR 18 | 945  |     |
| mirR 26 | 828  |     |
| mirR 23 | 38   |     |
| mirR 22 | 31   |     |
| mirR 23 | 28   |     |
| mirR 24 | 26   |     |
| mirR 21 | 23   |     |
| mirR 20 | 16   |     |
| mirR 19 | 16   |     |
| mirR 25 | 12   |     |
| mirR 19 | 12   |     |
| mirR 25 | 10   |     |
| mirR 18 | 9    |     |
| mirR 24 | 8    |     |
| mirR 22 | 8    |     |
| mirR 21 | 7    |     |
| mirR 19 | 6    |     |
| mirR 24 | 6    |     |
| mirR 25 | 4    |     |
| mirR 19 | 4    |     |
| mirR 26 | 4    |     |
| mirR 27 | 4    |     |
| mirR 26 | 4    |     |
| mirR 20 | 4    |     |
| mirR 18 | 4    |     |
| mirR 23 | 3    |     |

```

-----CCACCCCTTTACCCCGCT----- mirR 18 3
-----CCCACCCTTTACCCCGCTCCA----- mirR 21 2
-----CCACCCCTTTACCCCGCTCC----- mirR 20 2
-----CCACCCCTTTACCCCGCTCCAG----- mirR 22 1
-----CCACCCCTTTACCCCGCTCCAGGG----- mirR 24 1
-----CAGGGCATCTTCCTCCAC----- morR 18 10
-----AGGGCATCTTCCTCCACC----- morR 18 2
-----CCAGGGCATCTTCCTCCA----- morR 18 1
-----GGGCATCTTCCTCCACCT----- morR 18 1
-----CCAGGGCATCTTCCTCCACC----- morR 20 1
-----GGGCATCTTCCTCCACCTCA-- morR 20 1
-----TCCAGGGCATCTTCCTCCA----- morR 19 1
-----CCAGGGCATCTTCCTCCACCTCAGC morR 25 1
-----CAGGGCATCTTCCTCCACC----- morR 19 1
-----TCCAGGGCATCTTCCTCC----- morR 18 1

```

>mmu-mir-665

```

GCTCCCAGAACAGGGTCTCCTTGAGGGCCTCTGCCTCTATCCAGGATTATGTTTATGACCAGGAGGCTGAGGTCCCTTACAGGCGCCTCTACTCTCTCC species len reads
--TCCCAGAACAGGGTCTCCTTG----- morL 21 2
GCTCCCAGAACAGGGTCTCC----- morL 20 1
--TCCCAGAACAGGGTCTCC----- morL 18 1
--CCCAGAACAGGGTCTCCT----- morL 18 1
--TCCCAGAACAGGGTCTCCT----- morL 19 1
-----AGGGCCTCTGCCTCTATCC----- mirL 20 17
-----AGGGCCTCTGCCTCTATCCA----- mirL 21 7
-----AGGGCCTCTGCCTCTATC----- mirL 19 2
-----AGGGCCTCTGCCTCTAT----- mirL 18 2
-----GGGCCTCTGCCTCTATCCA----- mirL 19 1
-----AGGATTATGTTTATGAC----- loop 19 1
-----ACCAGGAGGCTGAGGTCCCTTAC----- mirR 23 5191
-----ACCAGGAGGCTGAGGTCCCTTA----- mirR 22 4798
-----ACCAGGAGGCTGAGGTCCCTT----- mirR 21 763
-----ACCAGGAGGCTGAGGTCCCT----- mirR 20 692
-----CCAGGAGGCTGAGGTCCCTTAC----- mirR 22 505
-----CCAGGAGGCTGAGGTCCCTTA----- mirR 21 412
-----ACCAGGAGGCTGAGGTCCC----- mirR 19 385
-----ACCAGGAGGCTGAGGTCCCTTACA----- mirR 24 337
-----ACCAGGAGGCTGAGGTCC----- mirR 18 190
-----CCAGGAGGCTGAGGTCCCTT----- mirR 20 58
-----CCAGGAGGCTGAGGTCCCTTACA----- mirR 23 43
-----CAGGAGGCTGAGGTCCCTTA----- mirR 20 34
-----CCAGGAGGCTGAGGTCCCT----- mirR 19 34
-----CCAGGAGGCTGAGGTCCC----- mirR 18 32
-----GACCAGGAGGCTGAGGTCCCTTA----- mirR 23 9
-----AGGAGGCTGAGGTCCCTTA----- mirR 19 7
-----CCAGGAGGCTGAGGTCCCTTACAG----- mirR 24 7

```

```

-----CAGGAGGCTGAGGTCCTT----- mirR 18 6
-----CAGGAGGCTGAGGTCCTTAC----- mirR 21 6
-----AGGAGGCTGAGGTCCTTAC----- mirR 20 5
-----GACCAGGAGGCTGAGGTCCTTAC----- mirR 24 4
-----CAGGAGGCTGAGGTCCTT----- mirR 19 2
-----GACCAGGAGGCTGAGGTCCTT----- mirR 22 2
-----TGACCAGGAGGCTGAGGTCCTTA----- mirR 24 1
-----GACCAGGAGGCTGAGGTCCTT----- mirR 20 1
-----ATGACCAGGAGGCTGAGGTCCTTA----- mirR 25 1
-----AGGAGGCTGAGGTCCTT----- mirR 18 1
-----CAGGCGGCCTCTTACTCTCT-- morR 20 1
-----CGGCCTCTTACTCTCTCC morR 18 1
-----GCGGCCTCTTACTCTCTC- morR 18 1

```

>mmu-mir-672

| Species | len | reads |
|---------|-----|-------|
| morL    | 18  | 1     |
| morL    | 18  | 1     |
| morL    | 22  | 1     |
| mirL    | 23  | 6191  |
| mirL    | 22  | 1515  |
| mirL    | 21  | 1499  |
| mirL    | 24  | 725   |
| mirL    | 19  | 384   |
| mirL    | 20  | 347   |
| mirL    | 18  | 301   |
| mirL    | 22  | 214   |
| mirL    | 21  | 61    |
| mirL    | 20  | 53    |
| mirL    | 20  | 48    |
| mirL    | 23  | 36    |
| mirL    | 21  | 31    |
| mirL    | 18  | 31    |
| mirL    | 19  | 30    |
| mirL    | 20  | 23    |
| mirL    | 18  | 17    |
| mirL    | 19  | 14    |
| mirL    | 22  | 7     |
| mirL    | 19  | 6     |
| mirL    | 21  | 6     |
| mirL    | 24  | 4     |
| mirL    | 18  | 4     |
| mirL    | 24  | 4     |
| mirL    | 22  | 3     |
| mirL    | 23  | 2     |
| mirL    | 18  | 1     |

```

-----GGTTGGTGTACTGTGTGTGAGTAT----- mirL 24 1
-----AGTTGGTGTACTGTGTGTGAGTATAC----- mirL 27 1
-----TTGAGGTTGGTGTACTGTGTGTGAG----- mirL 25 1
-----TTGAGGTTGGTGTACTGTGTG----- mirL 21 1
-----ACACACAGTCACTATCTTCGA--- mirR 21 1359
-----ACACACAGTCACTATCTTCGAA-- mirR 22 200
-----ACACACAGTCACTATCTTCG---- mirR 20 96
-----ACACACAGTCACTATCTTC---- mirR 19 93
-----ACACACAGTCACTATCTTCGAAA- mirR 23 61
-----ACACACAGTCACTATCTT----- mirR 18 51
-----ACACACAGTCACTATCTTCGAAAG mirR 24 49
-----CACACAGTCACTATCTTCGA--- mirR 20 3
-----CACAGTCACTATCTTCGAAAG mirR 21 2
-----ACACAGTCACTATCTTCGA--- mirR 19 2
-----CACACACAGTCACTATCT----- mirR 18 1
-----ATCACACACAGTCACTATCT----- mirR 20 1
-----CACACAGTCACTATCTTC---- mirR 18 1
-----CACACAGTCACTATCTTCGAAAG mirR 23 1
-----ATCACACACAGTCACTATC----- mirR 19 1
-----CACACACAGTCACTATCTTCGA--- mirR 22 1

```

>mmu-mir-877

```

TGCTGAGAAACTAGAAAAGGTAGAGGAGATGGCGCAGGGGACACAAGGTAGGCCTTGCGGGTCTGTGGACCCTTGGACATGTGTCTCTTCTCCCTCCTCCCAGGTGTATGAGGAACT species len reads
-GCTGAGAAACTAGAAAAG----- morL 18 2
TGCTGAGAAACTAGAAAAG----- morL 19 1
-----GTAGAGGAGATGGCGCAGGG----- mirL 20 286
-----GTAGAGGAGATGGCGCAGGGGAC----- mirL 23 210
-----GTAGAGGAGATGGCGCAGGGG----- mirL 21 126
-----GTAGAGGAGATGGCGCAGGGGA----- mirL 22 121
-----GTAGAGGAGATGGCGCAGG----- mirL 19 111
-----GTAGAGGAGATGGCGCAGGGGACA----- mirL 24 94
-----GTAGAGGAGATGGCGCAG----- mirL 18 68
-----AGAGGAGATGGCGCAGGG----- mirL 18 18
-----GAGGAGATGGCGCAGGGG----- mirL 18 13
-----TAGAGGAGATGGCGCAGGG----- mirL 19 13
-----AGAGGAGATGGCGCAGGGG----- mirL 19 8
-----TAGAGGAGATGGCGCAGG----- mirL 18 4
-----TAGAGGAGATGGCGCAGGGG----- mirL 20 3
-----TAGAGGAGATGGCGCAGGGGAC----- mirL 22 2
-----AGAGGAGATGGCGCAGGGGA----- mirL 20 1
-----TAGAGGAGATGGCGCAGGGGACA----- mirL 23 1
-----TAGAGGAGATGGCGCAGGGGACACAAG----- mirL 27 1
-----GAGGAGATGGCGCAGGGGA----- mirL 19 1
-----AGAGGAGATGGCGCAGGGGACA----- mirL 22 1
-----TGTCCTCTTCTCCCTCCTCCCA----- mirR 22 2547
-----TGTCCTCTTCTCCCTCCTCCAG----- mirR 23 1514

```

```

-----TGTCTCTTCTCCCTCCTCCC----- mirR 21 1514
-----TCCTCTTCTCCCTCCTCCCAGG----- mirR 22 1300
-----TCCTCTTCTCCCTCCTCCCAG----- mirR 21 1115
-----TGTCTCTTCTCCCTCCTCCCAGG----- mirR 24 681
-----TCCTCTTCTCCCTCCTCCCA----- mirR 20 664
-----TGTCTCTTCTCCCTCCTCC----- mirR 20 657
-----TCCTCTTCTCCCTCCTCCC----- mirR 19 488
-----TCCTCTTCTCCCTCCTCCCAGGT----- mirR 23 432
-----TGTCTCTTCTCCCTCCTCC----- mirR 19 316
-----TCCTCTTCTCCCTCCTCC----- mirR 18 235
-----TGTCTCTTCTCCCTCCTCCCAGGT----- mirR 25 225
-----TCCTCTTCTCCCTCCTCCCAGGTG----- mirR 24 148
-----GTCCTCTTCTCCCTCCTCCCAG----- mirR 22 68
-----GTCCTCTTCTCCCTCCTCCCA----- mirR 21 67
-----CCTCTTCTCCCTCCTCCCA----- mirR 19 55
-----GTCCTCTTCTCCCTCCTCCC----- mirR 20 50
-----CCTCTTCTCCCTCCTCCCAG----- mirR 20 41
-----GTCCTCTTCTCCCTCCTCCCAGG----- mirR 23 36
-----CCTCTTCTCCCTCCTCCCAG----- mirR 21 27
-----CCTCTTCTCCCTCCTCCC----- mirR 18 20
-----GTCCTCTTCTCCCTCCTCC----- mirR 19 15
-----GTCCTCTTCTCCCTCCTCCCAGGT----- mirR 24 12
-----GTCCTCTTCTCCCTCCTCC----- mirR 18 8
-----CCTCTTCTCCCTCCTCCCAGGT----- mirR 22 7
-----CCTCTTCTCCCTCCTCCCAGGTG----- mirR 23 6
-----TGTCTCTTCTCCCTC----- mirR 18 5
-----GTCCTCTTCTCCCTCCTCCCA----- mirR 23 3
-----GTCCTCTTCTCCCTCCTCC----- mirR 21 2
-----GTCCTCTTCTCCCTCCT----- mirR 19 1
-----ATGTCTCTTCTCCT----- mirR 18 1
-----TGTCTCTTCTCCTCC----- mirR 19 1
-----GTCCTCTTCTCCCTCCTCCCAGG----- mirR 25 1
-----CCAGGTGTATGAGGAACT morR 18 1

```

>mmu-mir-224

```

ACAAGGCCCGGGGCTTTTAAGTCACTAGTGGTCCGTTTAGTAGATGGTTTGTGCATTGTTTCAAAATGGTGCCCTAGTGACTACAAAGCCCCAGAGCCAGCA species len reads
ACAAGGCCCGGGGCTTT----- morL 19 1
ACAAGGCCCGGGGCTTT----- morL 18 1
-----TAAGTCACTAGTGGTCCGTTTA----- mirL 23 3431
-----TAAGTCACTAGTGGTCCGTT----- mirL 21 2801
-----TAAGTCACTAGTGGTCCGTTT----- mirL 22 2385
-----TAAGTCACTAGTGGTCCGT----- mirL 20 889
-----TAAGTCACTAGTGGTCCG----- mirL 19 871
-----AAGTCACTAGTGGTCCGTTTA----- mirL 22 283
-----TAAGTCACTAGTGGTCC----- mirL 18 273
-----AGTCACTAGTGGTCCGTTTA----- mirL 21 248

```



```

-----AAGTCACTAGTGGTTCCGTT----- mirL 20 231
-----TAAGTCACTAGTGGTTCCGTTTAG----- mirL 24 156
-----AGTCACTAGTGGTTCCGTT----- mirL 19 148
-----GTCAGTGGTTCCGTT----- mirL 18 144
-----AAGTCACTAGTGGTTCCGTTT----- mirL 21 131
-----AAGTCACTAGTGGTTCCG----- mirL 18 92
-----AGTCACTAGTGGTTCCGT----- mirL 18 89
-----AAGTCACTAGTGGTTCCGT----- mirL 19 82
-----AGTCACTAGTGGTTCCGTTT----- mirL 20 82
-----GTCAGTGGTTCCGTTTA----- mirL 20 69
-----GTCAGTGGTTCCGTTT----- mirL 19 36
-----AGTCACTAGTGGTTCCGTTTAG----- mirL 22 12
-----AAGTCACTAGTGGTTCCGTTTAG----- mirL 23 9
-----TTAAGTCACTAGTGGTTCCGTTT----- mirL 23 7
-----TTAAGTCACTAGTGGTTCCGTTTA----- mirL 24 6
-----TTAAGTCACTAGTGGTTCCGTT----- mirL 22 4
-----GTCAGTGGTTCCGTTTAG----- mirL 21 2
-----TTAAGTCACTAGTGGTTCCGT----- mirL 21 2
-----TTAAGTCACTAGTGGTTCCG----- mirL 20 2
-----AAGTCACTAGTGGTTCCGTTTAGT----- mirL 24 2
-----TTTAAGTCACTAGTGGTTCCGTTT----- mirL 24 1
-----AGTCACTAGTGGTTCCGTTTAGTAGA----- mirL 26 1
-----TTAAGTCACTAGTGGTTCC----- mirL 19 1
-----AGTCACTAGTGGTTCCGTTTAGT----- mirL 23 1
-----AAAAATGGTGCCCTAGTGACTACA----- mirR 23 233
-----AAAATGGTGCCCTAGTGACTAC----- mirR 22 231
-----AAAATGGTGCCCTAGTGACTACAA----- mirR 24 60
-----AATGGTGCCCTAGTGACTACA----- mirR 21 36
-----AAATGGTGCCCTAGTGACTACA----- mirR 22 29
-----ATGGTGCCCTAGTGACTACA----- mirR 20 21
-----AAATGGTGCCCTAGTGACTAC----- mirR 21 19
-----AAAATGGTGCCCTAGTGACTA----- mirR 21 18
-----ATGGTGCCCTAGTGACTAC----- mirR 19 14
-----AAAATGGTGCCCTAGTGACT----- mirR 20 13
-----AATGGTGCCCTAGTGACTAC----- mirR 20 12
-----AATGGTGCCCTAGTGACTACAA----- mirR 22 12
-----AAAATGGTGCCCTAGTGA----- mirR 18 9
-----AAAATGGTGCCCTAGTGAC----- mirR 19 8
-----AATGGTGCCCTAGTGACTA----- mirR 19 5
-----AAATGGTGCCCTAGTGACTACAA----- mirR 23 5
-----ATGGTGCCCTAGTGACTA----- mirR 18 3
-----ATGGTGCCCTAGTGACTACAA----- mirR 21 3
-----AAATGGTGCCCTAGTGACTA----- mirR 20 3
-----ATGGTGCCCTAGTGACTACAAA----- mirR 22 2
-----AAATGGTGCCCTAGTGACT----- mirR 19 2
-----CAAAATGGTGCCCTAGTGACTAC----- mirR 23 1

```

```

-----AAATGGTGCCCTAGTGACTACAAA----- mirR 24 1
-----AATGGTGCCCTAGTGACTACAAA----- mirR 23 1
-----ATGGTGCCCTAGTGACTACAAAGCC----- mirR 25 1
-----AAATGGTGCCCTAGTGACT----- mirR 18 1
-----AATGGTGCCCTAGTGACT----- mirR 18 1
-----AAAGCCCCAGAGCCAGCA morR 18 3
-----ACAAAGCCCCAGAGCCAG-- morR 18 1
-----ACAAAGCCCCAGAGCCAGC- morR 19 1

```

>mmu-mir-18a

```

GGTGCTGCGTGCTTTTTGTTCTAAGGTGCATCTAGTGCAGATAGTGAAGTAGACTAGCATCTACTGCCCTAAGTGCTCCTTCTGGC species len reads
GGTGCTGCGTGCTTTTTG----- morL 18 2
-----TAAGGTGCATCTAGTGCAGATAG----- mirL 23 2713
-----TAAGGTGCATCTAGTGCAGATA----- mirL 22 1878
-----TAAGGTGCATCTAGTGCAGAT----- mirL 21 1045
-----TAAGGTGCATCTAGTGCAGA----- mirL 20 634
-----TAAGGTGCATCTAGTGCAG----- mirL 19 407
-----TAAGGTGCATCTAGTGCAGATAGT----- mirL 24 385
-----AAGGTGCATCTAGTGCAGATAG----- mirL 22 246
-----AAGGTGCATCTAGTGCAGATA----- mirL 21 126
-----AAGGTGCATCTAGTGCAGAT----- mirL 20 89
-----GGTGCATCTAGTGCAGATA----- mirL 19 67
-----GGTGCATCTAGTGCAGATAG----- mirL 20 64
-----AAGGTGCATCTAGTGCAGA----- mirL 19 63
-----AAGGTGCATCTAGTGCAG----- mirL 18 61
-----AGGTGCATCTAGTGCAGATAG----- mirL 21 60
-----AGGTGCATCTAGTGCAGATA----- mirL 20 50
-----TAAGGTGCATCTAGTGCAGATAGTG----- mirL 25 49
-----AAGGTGCATCTAGTGCAGATAGT----- mirL 23 24
-----GGTGCATCTAGTGCAGATAGT----- mirL 21 18
-----AGGTGCATCTAGTGCAGAT----- mirL 19 18
-----GGTGCATCTAGTGCAGAT----- mirL 18 17
-----AGGTGCATCTAGTGCAGA----- mirL 18 15
-----AGGTGCATCTAGTGCAGATAGT----- mirL 22 7
-----AAGGTGCATCTAGTGCAGATAGTG----- mirL 24 2
-----GGTGCATCTAGTGCAGATAGTG----- mirL 22 1
-----AAGTAGACTAGCATCTAC----- loop 18 2
-----TAGTGAAGTAGACTAGCA----- loop 18 1
-----ACTGCCCTAAGTGCTCCTTCT--- mirR 21 2783
-----ACTGCCCTAAGTGCTCCTTCTG-- mirR 22 953
-----ACTGCCCTAAGTGCTCCTTCT--- mirR 20 667
-----ACTGCCCTAAGTGCTCCTTCT--- mirR 19 175
-----CTGCCCTAAGTGCTCCTTCT--- mirR 20 166
-----ACTGCCCTAAGTGCTCCTTCTGG- mirR 23 97
-----TGCCCTAAGTGCTCCTTCT--- mirR 19 78
-----ACTGCCCTAAGTGCTCCT--- mirR 18 69

```

```

-----CTGCCCTAAGTGCTCCTTCTG-- mirR 21 34
-----TGCCCTAAGTGCTCCTTCTG-- mirR 20 30
-----CTGCCCTAAGTGCTCCTTC---- mirR 19 28
-----GCCCTAAGTGCTCCTTCT--- mirR 18 21
-----TGCCCTAAGTGCTCCTTC---- mirR 18 19
-----ACTGCCCTAAGTGCTCCTTCTGGC mirR 24 13
-----GCCCTAAGTGCTCCTTCTG-- mirR 19 11
-----CTGCCCTAAGTGCTCCTTCTGG- mirR 22 11
-----CTGCCCTAAGTGCTCCTT---- mirR 18 7
-----TACTGCCCTAAGTGCTCCTTCT--- mirR 22 2
-----TACTGCCCTAAGTGCTCCTTCTG-- mirR 23 2
-----TACTGCCCTAAGTGCTCCTTC---- mirR 21 2
-----CTGCCCTAAGTGCTCCTTCTGGC mirR 23 2
-----TACTGCCCTAAGTGCTCCTT---- mirR 20 1
-----CTACTGCCCTAAGTGCTCC----- mirR 19 1
-----TCTACTGCCCTAAGTGCTCCTTC---- mirR 23 1

```

>mmu-mir-431

| Species | len | reads |
|---------|-----|-------|
| morL    | 19  | 2     |
| mirL    | 21  | 2555  |
| mirL    | 20  | 1027  |
| mirL    | 22  | 845   |
| mirL    | 19  | 337   |
| mirL    | 23  | 265   |
| mirL    | 18  | 155   |
| mirL    | 20  | 103   |
| mirL    | 24  | 89    |
| mirL    | 21  | 60    |
| mirL    | 19  | 37    |
| mirL    | 18  | 22    |
| mirL    | 18  | 19    |
| mirL    | 22  | 18    |
| mirL    | 19  | 10    |
| mirL    | 19  | 9     |
| mirL    | 23  | 6     |
| mirL    | 21  | 4     |
| mirL    | 20  | 4     |
| mirL    | 26  | 2     |
| mirL    | 21  | 2     |
| mirL    | 26  | 2     |
| mirL    | 21  | 1     |
| mirL    | 20  | 1     |
| mirL    | 22  | 1     |
| mirL    | 25  | 1     |

```

-----AGGTGTCTTGCAGGCCGTCA----- mirL 20 1
-----TCTTGCAGGCCGTGCATGCAG----- mirL 20 1
-----GGCCACACTGACGGTAACGTTGC----- loop 23 2
-----GCCACACTGACGGTAACG----- loop 18 1
-----GCCACACTGACGGTAACGT----- loop 19 1
-----CAGGTCGTCTTGCAGGGCTTCT----- mirR 22 2245
-----CAGGTCGTCTTGCAGGGCTTC----- mirR 21 1831
-----CAGGTCGTCTTGCAGGGCTTCTC----- mirR 23 1015
-----TGCAGGTCGTCTTGCAGGGCTTC----- mirR 23 446
-----CAGGTCGTCTTGCAGGGCTT----- mirR 20 301
-----GGTCGTCTTGCAGGGCTTCT----- mirR 20 136
-----CAGGTCGTCTTGCAGGGC----- mirR 18 133
-----CAGGTCGTCTTGCAGGGCT----- mirR 19 113
-----TGCAGGTCGTCTTGCAGGGCTTCT----- mirR 24 98
-----TGCAGGTCGTCTTGCAGGGC----- mirR 20 98
-----TTGCAGGTCGTCTTGCAGGGCTTC----- mirR 24 94
-----GTCGTCTTGCAGGGCTTCT----- mirR 19 90
-----CAGGTCGTCTTGCAGGGCTTCTCG----- mirR 24 79
-----TTGCAGGTCGTCTTGCAGGGC----- mirR 21 63
-----AGGTCGTCTTGCAGGGCTTCT----- mirR 21 51
-----TTGCAGGTCGTCTTGCAGGGCTTCT----- mirR 25 38
-----GTCGTCTTGCAGGGCTTCTC----- mirR 20 32
-----TGCAGGTCGTCTTGCAGGGCTTCTC----- mirR 25 32
-----TTGCAGGTCGTCTTGCAGGGCT----- mirR 22 31
-----TGCAGGTCGTCTTGCAGGG----- mirR 19 29
-----TTGCAGGTCGTCTTGCAGGGCTT----- mirR 23 27
-----GGTCGTCTTGCAGGGCTTC----- mirR 19 27
-----TGCAGGTCGTCTTGCAGGGCTT----- mirR 22 23
-----TTGCAGGTCGTCTTGCAGGG----- mirR 20 20
-----TTGCAGGTCGTCTTGCAGG----- mirR 19 18
-----GGTCGTCTTGCAGGGCTTCTC----- mirR 21 17
-----TGCAGGTCGTCTTGCAGGGCT----- mirR 21 17
-----GTCGTCTTGCAGGGCTTC----- mirR 18 14
-----AGGTCGTCTTGCAGGGCTTC----- mirR 20 11
-----GCAGGTCGTCTTGCAGGGCTTC----- mirR 22 10
-----GGTCGTCTTGCAGGGCTT----- mirR 18 10
-----AGGTCGTCTTGCAGGGCTTCTC----- mirR 22 7
-----AGGTCGTCTTGCAGGGCT----- mirR 18 3
-----GCAGGTCGTCTTGCAGGGCTTCT----- mirR 23 3
-----GCAGGTCGTCTTGCAGGGCTT----- mirR 21 2
-----GGTCGTCTTGCAGGGCTTCTCGC----- mirR 23 2
-----GCAGGTCGTCTTGCAGGGC----- mirR 19 2
-----GCAGGTCGTCTTGCAGGGCT----- mirR 20 1
-----AGGTCGTCTTGCAGGGCTT----- mirR 19 1
-----GCAGGTCGTCTTGCAGGGCTTCTC----- mirR 24 1
-----AGGTCGTCTTGCAGGGCTTCTCG----- mirR 23 1

```

```

-----TCGCAAGACGACATCTTCATCCCCAA----- morR 26 10
-----TCGCAAGACGACATCTTCATCC----- morR 22 10
-----TCGCAAGACGACATCTTCATCCCC----- morR 24 7
-----TCGCAAGACGACATCTTCATCCC----- morR 23 4
-----TCGCAAGACGACATCTTCATCCCCAACGACGTGC morR 34 3
-----TCGCAAGACGACATCTTCATCCCCAAC----- morR 27 2
-----TCGCAAGACGACATCTTCATC----- morR 21 1
-----CGCAAGACGACATCTTCATC----- morR 20 1

```

>mmu-mir-743a

| Sequence                                                        | species | len | reads |
|-----------------------------------------------------------------|---------|-----|-------|
| TATTCAGATTGGTGCCTGTCATGTTTATAAGAATGAAAGACACCAAGCTGAGTAGAGTAGGGC | mirL    | 23  | 65    |
| TATTCAGATTGGTGCCTGTCATG-----                                    | mirL    | 21  | 55    |
| TATTCAGATTGGTGCCTGTCA-----                                      | mirL    | 19  | 19    |
| TATTCAGATTGGTGCCTGTCAT-----                                     | mirL    | 22  | 16    |
| -ATTCAGATTGGTGCCTGTCATG-----                                    | mirL    | 22  | 15    |
| TATTCAGATTGGTGCCTGTCATGT-----                                   | mirL    | 24  | 9     |
| TATTCAGATTGGTGCCTGTC-----                                       | mirL    | 20  | 8     |
| -ATTCAGATTGGTGCCTGTCA-----                                      | mirL    | 20  | 6     |
| -ATTCAGATTGGTGCCTGT-----                                        | mirL    | 18  | 4     |
| TATTCAGATTGGTGCCTG-----                                         | mirL    | 18  | 4     |
| ---TCAGATTGGTGCCTGTCATG-----                                    | mirL    | 20  | 2     |
| --TTCAGATTGGTGCCTGTCATG-----                                    | mirL    | 21  | 2     |
| -ATTCAGATTGGTGCCTGTC-----                                       | mirL    | 19  | 2     |
| -ATTCAGATTGGTGCCTGTCATGT-----                                   | mirL    | 23  | 1     |
| ---TCAGATTGGTGCCTGTCA-----                                      | mirL    | 18  | 1     |
| ---TCAGATTGGTGCCTGTCATGT-----                                   | mirL    | 21  | 1     |
| -ATTCAGATTGGTGCCTGTCAT-----                                     | mirL    | 21  | 1     |
| --TTCAGATTGGTGCCTGTCA-----                                      | mirL    | 19  | 1     |
| -----GAAAGACACCAAGCTGAGTAG-----                                 | mirR    | 21  | 4427  |
| -----AAAGACACCAAGCTGAGTAG-----                                  | mirR    | 20  | 2295  |
| -----GAAAGACACCAAGCTGAGTAGA-----                                | mirR    | 22  | 1991  |
| -----AAAGACACCAAGCTGAGTAGA-----                                 | mirR    | 21  | 1210  |
| -----GAAAGACACCAAGCTGAGTA-----                                  | mirR    | 20  | 654   |
| -----GAAAGACACCAAGCTGAGTAGAG-----                               | mirR    | 23  | 308   |
| -----AAAGACACCAAGCTGAGTA-----                                   | mirR    | 19  | 304   |
| -----AAAGACACCAAGCTGAGTAGAG-----                                | mirR    | 22  | 230   |
| -----AAGACACCAAGCTGAGTAG-----                                   | mirR    | 19  | 177   |
| -----GAAAGACACCAAGCTGAG-----                                    | mirR    | 18  | 167   |
| -----GAAAGACACCAAGCTGAGT-----                                   | mirR    | 19  | 133   |
| -----AGACACCAAGCTGAGTAG-----                                    | mirR    | 18  | 110   |
| -----AAAGACACCAAGCTGAGT-----                                    | mirR    | 18  | 75    |
| -----AAGACACCAAGCTGAGTAGA-----                                  | mirR    | 20  | 69    |
| -----AGACACCAAGCTGAGTAGA-----                                   | mirR    | 19  | 56    |
| -----AAGACACCAAGCTGAGTA-----                                    | mirR    | 18  | 30    |
| -----AAAGACACCAAGCTGAGTAGAGT-----                               | mirR    | 23  | 19    |

```

-----AAGACACCAAGCTGAGTAGAG----- mirR 21 14
-----GAAAGACACCAAGCTGAGTAGAGT----- mirR 24 14
-----TGAAAGACACCAAGCTGAGTAG----- mirR 22 13
-----AGACACCAAGCTGAGTAGAG----- mirR 20 9
-----AAAGACACCAAGCTGAGTAGAGTAGGGC mirR 28 6
-----TGAAAGACACCAAGCTGAGTA----- mirR 21 2
-----AAGACACCAAGCTGAGTAGAGT----- mirR 22 1
-----TGAAAGACACCAAGCTGAGTAGA----- mirR 23 1
-----ATGAAAGACACCAAGCTGAGT----- mirR 21 1

```

>mmu-mir-130b

| Sequence                                                                                              | species | len | reads |
|-------------------------------------------------------------------------------------------------------|---------|-----|-------|
| TGAGACTGACAGGCTTGTTGGACACTCTTTCCTGTTGCACTACTGTGGCCTCTGGGAAGCAGTGCAATGATGAAAGGGCATCTGTGCGGGCCAGCTAAGGA | morL    | 20  | 1     |
| TGAGACTGACAGGCTTGTTG-----ACTCTTTCCTGTTGCACTAC-----                                                    | mirL    | 21  | 3743  |
| -----ACTCTTTCCTGTTGCACTA-----                                                                         | mirL    | 20  | 2325  |
| -----ACTCTTTCCTGTTGCACTACT-----                                                                       | mirL    | 22  | 1936  |
| -----ACTCTTTCCTGTTGCACT-----                                                                          | mirL    | 19  | 432   |
| -----ACTCTTTCCTGTTGCACTACTG-----                                                                      | mirL    | 23  | 328   |
| -----ACTCTTTCCTGTTGCAC-----                                                                           | mirL    | 18  | 114   |
| -----CTCTTTCCTGTTGCACTAC-----                                                                         | mirL    | 20  | 89    |
| -----CTTTCCTGTTGCACTAC-----                                                                           | mirL    | 18  | 84    |
| -----CTCTTTCCTGTTGCACTA-----                                                                          | mirL    | 19  | 75    |
| -----TCTTTCCTGTTGCACTA-----                                                                           | mirL    | 18  | 61    |
| -----TCTTTCCTGTTGCACTAC-----                                                                          | mirL    | 19  | 54    |
| -----CTCTTTCCTGTTGCACTACT-----                                                                        | mirL    | 21  | 46    |
| -----ACTCTTTCCTGTTGCACTACTGT-----                                                                     | mirL    | 24  | 33    |
| -----CTTTCCTGTTGCACTACT-----                                                                          | mirL    | 19  | 25    |
| -----CTCTTTCCTGTTGCACT-----                                                                           | mirL    | 18  | 15    |
| -----CACCTTTCCTGTTGCACTAC-----                                                                        | mirL    | 22  | 11    |
| -----TCTTTCCTGTTGCACTACT-----                                                                         | mirL    | 20  | 11    |
| -----CTCTTTCCTGTTGCACTACTG-----                                                                       | mirL    | 22  | 10    |
| -----CTTTCCTGTTGCACTACTG-----                                                                         | mirL    | 20  | 6     |
| -----CACTTTCCTGTTGCA-----                                                                             | mirL    | 18  | 5     |
| -----CACTTTCCTGTTGCACTA-----                                                                          | mirL    | 21  | 3     |
| -----CACCTTTCCTGTTGCACTACT-----                                                                       | mirL    | 23  | 2     |
| -----ACACTTTCCTGTTGC-----                                                                             | mirL    | 18  | 1     |
| -----CACCTTTCCTGTTGCACT-----                                                                          | mirL    | 20  | 1     |
| -----TCTTTCCTGTTGCACTACTG-----                                                                        | mirL    | 21  | 1     |
| -----CACCTTTCCTGTTGCAC-----                                                                           | mirL    | 19  | 1     |
| -----TGGGCCTCTGGGAAGCAG-----                                                                          | loop    | 18  | 1     |
| -----CAGTGCAATGATGAAAGGGCAT-----                                                                      | mirR    | 22  | 1189  |
| -----CAGTGCAATGATGAAAGGGCATC-----                                                                     | mirR    | 23  | 560   |
| -----CAGTGCAATGATGAAAGGGCA-----                                                                       | mirR    | 21  | 346   |
| -----AGTGCAATGATGAAAGGGCAT-----                                                                       | mirR    | 21  | 155   |
| -----CAGTGCAATGATGAAAGGGC-----                                                                        | mirR    | 20  | 150   |
| -----GTGCAATGATGAAAGGGCAT-----                                                                        | mirR    | 20  | 127   |

```

-----CAGTGAATGATGAAAGGGCATCT----- mirR 24 75
-----TGCAATGATGAAAGGGCAT----- mirR 19 44
-----AGTGAATGATGAAAGGGCATC----- mirR 22 43
-----CAGTGAATGATGAAAGGG----- mirR 19 36
-----GTGAATGATGAAAGGGCATC----- mirR 21 28
-----CAGTGAATGATGAAAGG----- mirR 18 19
-----TGCAATGATGAAAGGGCATC----- mirR 20 10
-----AGTGAATGATGAAAGGGCA----- mirR 20 9
-----TGCAATGATGAAAGGGCA----- mirR 18 7
-----AGTGAATGATGAAAGGGCATCT----- mirR 23 5
-----AGTGAATGATGAAAGGGC----- mirR 19 4
-----AGTGAATGATGAAAGGG----- mirR 18 3
-----GTGAATGATGAAAGGGCATCT----- mirR 22 3
-----GTGAATGATGAAAGGGCATCTG----- mirR 23 1
-----AAGCAGTGAATGATGAAAGGG----- mirR 22 1
-----TGCAATGATGAAAGGGCATCT----- mirR 21 1
-----TGTCGGGCCAGCTAAGGA morR 18 1
-----CATCTGTCGGGCCAGCTA---- morR 18 1

```

>mmu-mir-25

```

CCACCGGGACTGGCCAGTGTGAGAGGCGGAGACTTGGGCAATTGCTGGACGCTGCCCTGGGCATTGCACTTGTCTCGGTCTGACAGTGCCGGCCCAACTG species len reads
----GGGACTGGCCAGTGTGAG----- morL 19 1
----CGGGACTGGCCAGTGTGAG----- morL 20 1
----ACTGGCCAGTGTGAGAG----- morL 19 1
CCACCGGGACTGGCCAGTGT----- morL 21 1
-----AGGCGGAGACTTGGGCAATT----- mirL 20 333
-----AGGCGGAGACTTGGGCAATTG----- mirL 21 316
-----AGGCGGAGACTTGGGCAAT----- mirL 19 288
-----AGGCGGAGACTTGGGCAATTGC----- mirL 22 158
-----AGGCGGAGACTTGGGCAA----- mirL 18 122
-----AGGCGGAGACTTGGGCAATTGCT----- mirL 23 48
-----GGCGGAGACTTGGGCAATT----- mirL 19 12
-----AGGCGGAGACTTGGGCAATTGCTG----- mirL 24 8
-----GGCGGAGACTTGGGCAATTG----- mirL 20 8
-----GGCGGAGACTTGGGCAAT----- mirL 18 4
-----GCGGAGACTTGGGCAATT----- mirL 18 4
-----CGGAGACTTGGGCAATTG----- mirL 18 4
-----GCGGAGACTTGGGCAATTG----- mirL 19 2
-----GCGGAGACTTGGGCAATTGC----- mirL 20 2
-----GAGGCGGAGACTTGGGCAA----- mirL 19 1
-----GAGGCGGAGACTTGGGCAATT----- mirL 21 1
-----GCGGAGACTTGGGCAATTG----- mirL 21 1
-----CATTGCACTTGTCTCGGTCTG----- mirR 21 3080
-----CATTGCACTTGTCTCGGTCT----- mirR 20 2517
-----CATTGCACTTGTCTCGGTCTGA----- mirR 22 2476
-----CATTGCACTTGTCTCGGTCTGAC----- mirR 23 1621

```

```

-----CATTGCACTTGTCTCGGTC----- mirR 19 525
-----CATTGCACTTGTCTCGGTCTGACA----- mirR 24 168
-----CATTGCACTTGTCTCGGT----- mirR 18 166
-----ATTGCACTTGTCTCGGTCTG----- mirR 20 54
-----ATTGCACTTGTCTCGGTCTGA----- mirR 21 49
-----TGCACCTTGTCTCGGTCTG----- mirR 18 44
-----TTGCACTTGTCTCGGTCTG----- mirR 19 24
-----TGCACCTTGTCTCGGTCTGA----- mirR 19 21
-----ATTGCACTTGTCTCGGTCT----- mirR 19 18
-----TTGCACTTGTCTCGGTCTGA----- mirR 20 17
-----TTGCACTTGTCTCGGTCT----- mirR 18 15
-----TTGCACTTGTCTCGGTCTGAC----- mirR 21 4
-----ATTGCACTTGTCTCGGTCTGAC----- mirR 22 4
-----ATTGCACTTGTCTCGGTCT----- mirR 18 3
-----GCATTGCACTTGTCTCGGTCTGAC----- mirR 24 2
-----GGCATTGCACTTGTCTCG----- mirR 18 1
-----GCATTGCACTTGTCTCGGTCTG----- mirR 22 1
-----CTGACAGTGCCGGCCCAAC----- morR 19 1
-----ACAGTGCCGGCCCAACAC----- morR 18 1
-----AGTGCCGGCCCAACACTG morR 18 1

```

>mmu-mir-469

```

CTTGACCCAAAAGCAGCCGCGGTGCCTCTTTTCATTGATCTTGGTGTCTCAAATTGAAAGCCAAGGAAGAGGTGGGGGGCGTGGTAGCCTTTTGCCTCT species len reads
CTTGACCCAAAAGCAGCCG----- morL 19 2
-----TGCCTCTTTTCATTGATCTTGGTGTCC----- mirL 26 7890
-----TGCCTCTTTTCATTGATCTTGGTGTCT----- mirL 27 1148
-----TGCCTCTTTTCATTGATCTTGGTGT----- mirL 24 981
-----TGCCTCTTTTCATTGATCTTGGTGTCT----- mirL 25 950
-----GCCTCTTTTCATTGATCTTGGTGTCC----- mirL 25 285
-----TGCCTCTTTTCATTGATCTTGGTGT----- mirL 23 151
-----TGCCTCTTTTCATTGATCTTGGTGTCTC----- mirL 28 126
-----TGCCTCTTTTCATTGATCTTGGT----- mirL 22 87
-----GCCTCTTTTCATTGATCTTGGTGTCT----- mirL 24 45
-----GCCTCTTTTCATTGATCTTGGTGTCTC----- mirL 26 45
-----CCTCTTTTCATTGATCTTGGTGTCC----- mirL 24 39
-----GCCTCTTTTCATTGATCTTGGTGT----- mirL 23 32
-----CTCTTTTCATTGATCTTGGTGTCC----- mirL 23 28
-----CCTCTTTTCATTGATCTTGGTGTCTC----- mirL 25 10
-----GTGCCTCTTTTCATTGATCTTGGTGTCC----- mirL 27 8
-----CCTCTTTTCATTGATCTTGGTGTCT----- mirL 23 7
-----CCTCTTTTCATTGATCTTGGTGT----- mirL 22 6
-----GCCTCTTTTCATTGATCTTGGTGT----- mirL 22 6
-----CCTCTTTTCATTGATCTTGGT----- mirL 20 4
-----GCCTCTTTTCATTGATCTTGGT----- mirL 21 3
-----CCTCTTTTCATTGATCTTGGTGTCTC----- mirL 26 2
-----GCCTCTTTTCATTGATCTTGT----- mirL 19 2

```



```

-----CCTCTTTTCATTGATCTTG----- mirL 18 2
-----GTGCCTCTTTTCATTGATCTTGGTGT----- mirL 25 2
-----CTCTTTTCATTGATCTTGGTGTC----- mirL 22 2
-----CTCTTTTCATTGATCTTGGT----- mirL 19 1
-----GTGCCTCTTTTCATTGATCTTGGTGTCT----- mirL 28 1
-----GTGCCTCTTTTCATTGATCTTGGT----- mirL 23 1
-----GGTGCCTCTTTTCATTGAT----- mirL 18 1
-----CTCTTTTCATTGATCTTGGTGT----- mirL 21 1
-----CTCTTTTCATTGATCTTGGTGTCTC----- mirL 25 1
-----GTGCCTCTTTTCATTGATCTTGGTGTC----- mirL 26 1
-----CTCTTTTCATTGATCTTGGTGTCTCA----- mirL 26 1
-----TCCTCAAATGAAAGCCA----- loop 18 1
-----CCAAGGAAGAGGTGGGGG----- mirR 18 4
-----GCCAAGGAAGAGGTGGGG----- mirR 18 3
-----CAAGGAAGAGGTGGGGGG----- mirR 18 3
-----GCCAAGGAAGAGGTGGGGG----- mirR 19 2
-----CCAAGGAAGAGGTGGGGGG----- mirR 19 2
-----AGCCAAGGAAGAGGTGGGGG----- mirR 20 1
-----AGCCAAGGAAGAGGTGGG----- mirR 18 1
-----AAGGAAGAGGTGGGGGGC----- mirR 18 1
-----TGGTAGCCTTTTGCCTCT morR 18 1
-----GCGTGGTAGCCTTTTGCC--- morR 18 1
-----GGCGTGGTAGCCTTTTGCCTCT morR 22 1

```

>mmu-mir-542

| sequence                                                                                                | species | len | reads |
|---------------------------------------------------------------------------------------------------------|---------|-----|-------|
| CACATGCAGGGATCTCAGACGTCTCGGGGATCATCATGTACAGAGATACCCTGTGCCCTTGTGACAGATTGATAACTGAAAGGTCTGGGAGCCACTCCTCTTC | morL    | 19  | 1     |
| CACATGCAGGGATCTCAGA                                                                                     | morL    | 18  | 1     |
| -----AGGGATCTCAGACGTCTC-----                                                                            | mirL    | 21  | 2489  |
| -----CTCGGGGATCATCATGTACAG-----                                                                         | mirL    | 22  | 785   |
| -----CTCGGGGATCATCATGTACGA-----                                                                         | mirL    | 19  | 654   |
| -----CTCGGGGATCATCATGTCA-----                                                                           | mirL    | 20  | 572   |
| -----TCGGGGATCATCATGTACGAG-----                                                                         | mirL    | 22  | 326   |
| -----TCGGGGATCATCATGTACGA-----                                                                          | mirL    | 21  | 263   |
| -----TCGGGGATCATCATGTACAG-----                                                                          | mirL    | 20  | 220   |
| -----TCGGGGATCATCATGTACGAGA-----                                                                        | mirL    | 23  | 200   |
| -----CTCGGGGATCATCATGTACAGAG-----                                                                       | mirL    | 23  | 140   |
| -----CTCGGGGATCATCATGTAC-----                                                                           | mirL    | 18  | 96    |
| -----TCGGGGATCATCATGTCA-----                                                                            | mirL    | 18  | 66    |
| -----CGGGGATCATCATGTACAG-----                                                                           | mirL    | 19  | 60    |
| -----TCGGGGATCATCATGTACAGAGAT-----                                                                      | mirL    | 24  | 55    |
| -----GGGGATCATCATGTACAG-----                                                                            | mirL    | 18  | 47    |
| -----CGGGGATCATCATGTACGA-----                                                                           | mirL    | 20  | 38    |
| -----GGGGATCATCATGTACAG-----                                                                            | mirL    | 19  | 35    |
| -----TCGGGGATCATCATGTACAG-----                                                                          | mirL    | 19  | 31    |
| -----CGGGGATCATCATGTACAGAG-----                                                                         | mirL    | 21  | 26    |

```

-----CTCGGGGATCATCATGTCACGAGA----- mirL 24 16
-----GGGGATCATCATGTCACGAG----- mirL 20 15
-----CGGGGATCATCATGTCAC----- mirL 18 12
-----CGGGGATCATCATGTCACGAGA----- mirL 22 12
-----TCTCGGGGATCATCATGTCACG----- mirL 22 8
-----CGGGGATCATCATGTCACGAGAT----- mirL 23 5
-----GTCTCGGGGATCATCATGTCACG----- mirL 23 4
-----GGGGATCATCATGTCACGAGA----- mirL 21 3
-----TCTCGGGGATCATCATGTCAC----- mirL 21 2
-----TCTCGGGGATCATCATGTCACGA----- mirL 23 1
-----CGGGGATCATCATGTCACGAGATACC----- mirL 26 1
-----AGATACCACTGTGCCCTTG----- loop 19 2
-----TGTGACAGATTGATAACTGAAA----- mirR 22 1528
-----TGTGACAGATTGATAACTGA----- mirR 20 1478
-----TGTGACAGATTGATAACTGAA----- mirR 21 1307
-----TGTGACAGATTGATAACTGAAAAG----- mirR 23 328
-----GTGACAGATTGATAACTGA----- mirR 19 179
-----TGTGACAGATTGATAACTG----- mirR 19 128
-----GTGACAGATTGATAACTGAAA----- mirR 21 124
-----GTGACAGATTGATAACTGAA----- mirR 20 109
-----TGTGACAGATTGATAACT----- mirR 18 93
-----GACAGATTGATAACTGAAA----- mirR 19 89
-----GACAGATTGATAACTGAA----- mirR 18 66
-----TGTGACAGATTGATAACTGAAAAG----- mirR 24 57
-----TGACAGATTGATAACTGAAA----- mirR 20 53
-----TGACAGATTGATAACTGA----- mirR 18 47
-----TGACAGATTGATAACTGAA----- mirR 19 29
-----GTGACAGATTGATAACTGAAAAG----- mirR 22 15
-----GTGACAGATTGATAACTG----- mirR 18 13
-----TGACAGATTGATAACTGAAAAG----- mirR 21 10
-----GACAGATTGATAACTGAAAAG----- mirR 20 9
-----TTGTGACAGATTGATAACTGA----- mirR 21 7
-----TTGTGACAGATTGATAACTGAAA----- mirR 23 5
-----GTGACAGATTGATAACTGAAAAG----- mirR 23 2
-----TGACAGATTGATAACTGAAAAG----- mirR 22 2
-----GTGACAGATTGATAACTGAAAAGGT----- mirR 24 1
-----TTGTGACAGATTGATAACT----- mirR 19 1
-----CCTTGTGACAGATTGATA----- mirR 18 1
-----TCTGGGAGCCACTCCTCTTC morR 20 1
-----CTGGGAGCCACTCCTCTTC morR 19 1

```

>mmu-mir-363

```

CAGGTGGAACACGATGCAATTTTGGTTGGTGTAAATAGGAGGAAAATTGCACGGTATCCATCTGTAAACCGCAGGACCTATGTGGAC species len reads
---GTGGAACACGATGCAATT----- mirL 18 8
CAGGTGGAACACGATGCAATT----- mirL 21 6
---GTGGAACACGATGCAATTT----- mirL 19 6

```

```

--GGTGGAACACGATGCAATT----- mirL 19 5
--GGTGGAACACGATGCAATTT----- mirL 20 5
CAGGTGGAACACGATGCAATTT----- mirL 22 4
----TGGAACACGATGCAATTT----- mirL 18 2
----GAACACGATGCAATTTT----- mirL 18 1
CAGGTGGAACACGATGCAATTT----- mirL 23 1
----TGGAACACGATGCAATTTT----- mirL 20 1
----GGAACACGATGCAATTT----- mirL 18 1
-----GTTGGTGTAAATAGGAGGA----- loop 18 1
-----ATTGCACGGTATCCATCTGTAA----- mirR 22 7574
-----AATTGCACGGTATCCATCTG----- mirR 20 763
-----AATTGCACGGTATCCATCTGT----- mirR 21 738
-----AATTGCACGGTATCCATCTGTAA----- mirR 23 662
-----AATTGCACGGTATCCATCT----- mirR 19 639
-----AATTGCACGGTATCCATCTGTA----- mirR 22 290
-----ATTGCACGGTATCCATCTGTAAA----- mirR 23 236
-----TGCACGGTATCCATCTGTAA----- mirR 20 132
-----GCACGGTATCCATCTGTAA----- mirR 19 121
-----ATTGCACGGTATCCATCTGTA----- mirR 21 105
-----ATTGCACGGTATCCATCT----- mirR 18 104
-----AATTGCACGGTATCCATC----- mirR 18 93
-----ATTGCACGGTATCCATCTGT----- mirR 20 89
-----ATTGCACGGTATCCATCTG----- mirR 19 77
-----TTGCACGGTATCCATCTGTAA----- mirR 21 51
-----AATTGCACGGTATCCATCTGTAAA----- mirR 24 26
-----ATTGCACGGTATCCATCTGTAAAC----- mirR 24 25
-----TTGCACGGTATCCATCTG----- mirR 18 15
-----TGCACGGTATCCATCTGT----- mirR 18 15
-----TTGCACGGTATCCATCTGT----- mirR 19 14
-----GCACGGTATCCATCTGTA----- mirR 18 10
-----TGCACGGTATCCATCTGTA----- mirR 19 8
-----AAATTGCACGGTATCCATCTGT----- mirR 22 3
-----TTGCACGGTATCCATCTGTA----- mirR 20 2
-----AAAATTGCACGGTATCCATCTGTAA----- mirR 25 2
-----GCACGGTATCCATCTGTAAA----- mirR 20 2
-----GCACGGTATCCATCTGTAAACCG----- mirR 23 1
-----TTGCACGGTATCCATCTGTAAAC----- mirR 23 1
-----CGCAGGACCTATGTGGAC----- morR 18 6
-----ACCGCAGGACCTATGTGG----- morR 18 1

```

>mmu-mir-98

```

ACATCTGCACATGCTGGGGTGAGGTAGTAAGTTGTATTGTTGTGGGGTAGGGATTTTAGGCCCCAGTAAGAAGATAACTATACAACCTTACTACTTTTCTTGGTGTGTGGCATATTACATTAAGTCTTGGC species
ACATCTGCACATGCTGGGG----- morL 19 3
-CATCTGCACATGCTGGGG----- morL 18 1
ACATCTGCACATGCTGGGGT----- morL 20 1
--ATCTGCACATGCTGGGGT----- morL 18 1

```

```

-----TGAGGTAGTAAGTTGTATTGT----- mirL 21 3
-----TGAGGTAGTAAGTTGTATTGTT----- mirL 22 2
-----TGAGGTAGTAAGTTGTATTG----- mirL 20 1
-----TGAGGTAGTAAGTTGTATTGTTG----- mirL 23 1
-----TGAGGTAGTAAGTTGTATT----- mirL 19 4
-----TGAGGTAGTAAGTTGTAT----- mirL 18 3
-----TGAGGTAGTAAGTTGTATTGTTGT----- mirL 24 2
-----GAGGTAGTAAGTTGTATTG----- mirL 19 5
-----GAGGTAGTAAGTTGTATTGT----- mirL 20 5
-----GAGGTAGTAAGTTGTATTGTT----- mirL 21 4
-----AGGTAGTAAGTTGTATTG----- mirL 18 3
-----GAGGTAGTAAGTTGTATTGTTG----- mirL 22 2
-----GAGGTAGTAAGTTGTATTGTTGT----- mirL 23 1
-----GGTAGTAAGTTGTATTGT----- mirL 18 9
-----GAGGTAGTAAGTTGTATT----- mirL 18 7
-----GGTAGTAAGTTGTATTGTT----- mirL 19 5
-----AGGTAGTAAGTTGTATTGTT----- mirL 20 3
-----AGGTAGTAAGTTGTATTGTTGT----- mirL 22 2
-----GTGAGGTAGTAAGTTGTATTGT----- mirL 22 2
-----GTGAGGTAGTAAGTTGTATTG----- mirL 21 2
-----GAGGTAGTAAGTTGTATTGTTGTG----- mirL 24 2
-----GGTAGTAAGTTGTATTGTTGT----- mirL 21 1
-----GTGAGGTAGTAAGTTGTAT----- mirL 19 1
-----AGGTAGTAAGTTGTATTGT----- mirL 19 1
-----GTGGGGTAGGGATTTTAGGCCCCAGTAAGAAGA----- loop 33 1
-----CTATACAACCTTACTACTTTCCT----- mirR 22 6
-----CTATACAACCTTACTACTTTC----- mirR 21 1
-----CTATACAACCTTACTACTTTCCTT----- mirR 23 1
-----TATACAACCTTACTACTTTCCTT----- mirR 22 1
-----CTATACAACCTTACTACTTTC----- mirR 20 8
-----TATACAACCTTACTACTTTCCT----- mirR 21 3
-----CTATACAACCTTACTACTTTCCTTG----- mirR 24 3
-----TATACAACCTTACTACTTTC----- mirR 20 2
-----TATACAACCTTACTACTTTCCTTG----- mirR 23 1
-----CTATACAACCTTACTACTT----- mirR 18 1
-----TATACAACCTTACTACTTTC----- mirR 19 1
-----CTATACAACCTTACTACTTT----- mirR 19 1
-----ATACAACCTTACTACTTTCCTT----- mirR 21 1
-----TATACAACCTTACTACTTTCCTTGG----- mirR 24 1
-----ACTATACAACCTTACTACTTTC----- mirR 22 1
-----TATACAACCTTACTACTTT----- mirR 18 6
-----ACTATACAACCTTACTACTTTCCT----- mirR 23 3
-----AACTATACAACCTTACTACTTTC----- mirR 23 2
-----ATACAACCTTACTACTTTCCTTG----- mirR 22 2
-----TACAACCTTACTACTTTC----- mirR 18 1
-----ATACAACCTTACTACTTTCCT----- mirR 20 1

```

```

-----ACTATACAACCTTACTACTTTCCTT----- mirR 24 1
-----GGTGTGTGGCATATTCAC----- morR 18 1
-----TTGGTGTGTGGCATATTCACATTAAGTCTTGGC morR 33 1

>mmu-mir-448
TCCTTCCCATGGACGAGGAGGTTGAACATCCTGCATAGTGCTGCCAGGAAATCCCTACTTCATACTAAGAGGGGGCTGGCTGGTTGCATATGTAGGATGTCCCATCTCCTGGCCCACTTCGTTCATG species len
----TCCCATGGACGAGGAGGTT----- morL 19 9
----TCCCATGGACGAGGAGGTT----- morL 18 3
----TTCCCATGGACGAGGAGGTT----- morL 20 3
----TCCCATGGACGAGGAGGTTG----- morL 20 2
----CCCATGGACGAGGAGGTTG----- morL 19 1
----CCATGGACGAGGAGGTTGA----- morL 19 1
----TTCCCATGGACGAGGAGGTT----- morL 19 1
----CCATGGACGAGGAGGTTG----- morL 18 1
TCCTTCCCATGGACGAGGAGGTT----- morL 22 1
----CCCATGGACGAGGAGGTT----- morL 18 1
--CTTCCCATGGACGAGGAGG----- morL 19 1
----CATGGACGAGGAGGTTGA----- morL 18 1
-----GAACATCCTGCATAGTGCTGCC----- mirL 22 1102
-----AACATCCTGCATAGTGCTGCCA----- mirL 22 933
-----AACATCCTGCATAGTGCTGCC----- mirL 21 680
-----AACATCCTGCATAGTGCTGCCAG----- mirL 23 554
-----GAACATCCTGCATAGTGCTGCCA----- mirL 23 389
-----GAACATCCTGCATAGTGC----- mirL 18 252
-----AACATCCTGCATAGTGCTGC----- mirL 20 227
-----GAACATCCTGCATAGTGCTGC----- mirL 21 197
-----AACATCCTGCATAGTGCTGCCAG----- mirL 24 153
-----GAACATCCTGCATAGTGCTGCCAG----- mirL 24 143
-----AACATCCTGCATAGTGCTGCCAGGA----- mirL 25 134
-----GAACATCCTGCATAGTGCTG----- mirL 20 81
-----GAACATCCTGCATAGTGCT----- mirL 19 74
-----AACATCCTGCATAGTGCTG----- mirL 19 25
-----ACATCCTGCATAGTGCTGCCA----- mirL 21 2
-----ACATCCTGCATAGTGCTGCCAGGA----- mirL 24 1
-----TGAACATCCTGCATAGTGCT----- mirL 20 1
-----TGAACATCCTGCATAGTGC----- mirL 19 1
-----CATCCTGCATAGTGCTGCC----- mirL 19 1
-----TTGAACATCCTGCATAGTGCTG----- mirL 22 1
-----TTGCATATGTAGGATGTCCCAT----- mirR 22 2999
-----TTGCATATGTAGGATGTCCCATC----- mirR 23 1444
-----TTGCATATGTAGGATGTCCCA----- mirR 21 1320
-----TTGCATATGTAGGATGTCCC----- mirR 20 323
-----TTGCATATGTAGGATGTCC----- mirR 19 264
-----TTGCATATGTAGGATGTCCCATCT----- mirR 24 103
-----TGCATATGTAGGATGTCCCAT----- mirR 21 95
-----GTTGCATATGTAGGATGTCCC----- mirR 21 54

```

```

-----TGCATATGTAGGATGTCCCA----- mirR 20 48
-----TTGCATATGTAGGATGTC----- mirR 18 44
-----TGCATATGTAGGATGTCCCATC----- mirR 22 30
-----GCATATGTAGGATGTCCCAT----- mirR 20 25
-----GTTGCATATGTAGGATGTCCCA----- mirR 22 20
-----GTTGCATATGTAGGATGTCC----- mirR 20 19
-----CATATGTAGGATGTCCCAT----- mirR 19 16
-----GTTGCATATGTAGGATGTCCCAT----- mirR 23 12
-----TGCATATGTAGGATGTCCC----- mirR 19 8
-----CATATGTAGGATGTCCCA----- mirR 18 7
-----GTTGCATATGTAGGATGTCCCATC----- mirR 24 4
-----CATATGTAGGATGTCCCAT----- mirR 20 4
-----GCATATGTAGGATGTCCCA----- mirR 19 3
-----GCATATGTAGGATGTCCC----- mirR 18 2
-----GCATATGTAGGATGTCCCATC----- mirR 21 2
-----GCATATGTAGGATGTCCCATCT----- mirR 22 2
-----TGCATATGTAGGATGTCC----- mirR 18 1
-----GTTGCATATGTAGGATGT----- mirR 18 1
-----GTTGCATATGTAGGATGTC----- mirR 19 1
-----TGCATATGTAGGATGTCCCATCT----- mirR 23 1
-----CATATGTAGGATGTCCCATCTCCTGG----- mirR 26 1
-----TGTTGCATATGTAGGATGTCC----- mirR 22 1
-----TGCATATGTAGGATGTCCCATCTC----- mirR 24 1
-----CTGGCCCACTTCGTCATG morr 18 1

```

>mmu-mir-670

```

TGTTTGGAGGTGGGCCTGACATCCCTGAGTGTATGTGGTGAACCTGAACTTGGCCTGGGTTTCCTCATATCCATTGAGGAGTGTGAGCTGCCTCTTCGCTCAAC species len reads
TGTTTGGAGGTGGGCCTG----- morL 19 1
-----ATCCCTGAGTGTATGTGGTGAA----- mirL 22 6075
-----ATCCCTGAGTGTATGTGGTGA----- mirL 21 2218
-----ATCCCTGAGTGTATGTGGTG----- mirL 20 1255
-----ATCCCTGAGTGTATGTGGTGAAC----- mirL 23 771
-----ATCCCTGAGTGTATGTGGT----- mirL 19 178
-----ATCCCTGAGTGTATGTGGTGAACC----- mirL 24 169
-----TCCCTGAGTGTATGTGGTGAA----- mirL 21 110
-----CCCTGAGTGTATGTGGTGAA----- mirL 20 91
-----ATCCCTGAGTGTATGTGG----- mirL 18 90
-----TCCCTGAGTGTATGTGGTG----- mirL 19 74
-----CCCTGAGTGTATGTGGTG----- mirL 18 42
-----CCTGAGTGTATGTGGTGAA----- mirL 19 36
-----TCCCTGAGTGTATGTGGTGA----- mirL 20 32
-----CCCTGAGTGTATGTGGTGA----- mirL 19 19
-----CCTGAGTGTATGTGGTGA----- mirL 18 14
-----TCCCTGAGTGTATGTGGTGAAC----- mirL 22 12
-----CCCTGAGTGTATGTGGTGAAC----- mirL 21 11
-----TCCCTGAGTGTATGTGGT----- mirL 18 11

```

```

-----CATCCCTGAGTGTATGTGGTGAA----- mirL 23 6
-----CATCCCTGAGTGTATGTGGTG----- mirL 21 6
-----TCCCTGAGTGTATGTGGTGAACC----- mirL 23 5
-----TCCCTGAGTGTATGTGGTGAACCT----- mirL 24 3
-----CATCCCTGAGTGTATGTGG----- mirL 19 2
-----CCTGAGTGTATGTGGTGAACCT----- mirL 22 2
-----CCTGAGTGTATGTGGTGAAC----- mirL 20 2
-----GACATCCCTGAGTGTATGTGGTGAA----- mirL 25 1
-----ACATCCCTGAGTGTATGTGGTGAA----- mirL 24 1
-----CATCCCTGAGTGTATGTGGTGAAC----- mirL 24 1
-----AACCTGAACTTGCCCTGGG----- loop 19 1
-----TGAACTTGCCCTGGGTTT----- loop 18 1
-----TGAACTTGCCCTGGGTTTCC----- loop 20 1
-----CCTGAACTTGCCCTGGGTTTCC----- loop 22 1
-----CCTCATATCCATT CAGGAGTGT----- mirR 22 184
-----CCTCATATCCATT CAGGAGTGTC----- mirR 23 86
-----TTTCCTCATATCCATT CAGGAGT----- mirR 23 71
-----TTTCCTCATATCCATT CAGGAGTG----- mirR 24 30
-----TTCCTCATATCCATT CAGGAGT----- mirR 22 24
-----TTCCTCATATCCATT CAGGAGTG----- mirR 23 22
-----TTTCCTCATATCCATT CAGGAG----- mirR 22 22
-----TTCCTCATATCCATT CAGGAGTGT----- mirR 24 21
-----TTTCCTCATATCCATT CAGGAGTGT----- mirR 25 20
-----CCTCATATCCATT CAGGAGTG----- mirR 21 19
-----TTTCCTCATATCCATT CAG----- mirR 19 16
-----TTCCTCATATCCATT CAGGAGTGTC----- mirR 25 7
-----TTTCCTCATATCCATT CA----- mirR 18 6
-----TTCCTCATATCCATT CAGGAG----- mirR 21 6
-----TTTCCTCATATCCATT CAGGA----- mirR 21 6
-----CCTCATATCCATT CAGGAGT----- mirR 20 6
-----TTCCTCATATCCATT CAGGA----- mirR 20 5
-----CCTCATATCCATT CAGGAGTGTC----- mirR 24 3
-----TTCCTCATATCCATT CAGG----- mirR 19 2
-----TCCTCATATCCATT CAGGA----- mirR 19 1
-----TCCTCATATCCATT CAGGAGT----- mirR 21 1
-----TCCTCATATCCATT CAGGAGTGTC----- mirR 24 1
-----CCTCATATCCATT CAGGAG----- mirR 19 1
-----CATATCCATT CAGGAGTGTC----- mirR 20 1
-----CATATCCATT CAGGAGTG----- mirR 18 1
-----TCCTCATATCCATT CAGG----- mirR 18 1
-----TCCTCATATCCATT CAGGAGTG----- mirR 22 1
-----TCAGCTGCCTCTTCGCTCA----- morR 19 4
-----TCAGCTGCCTCTTCGCTC----- morR 18 2
-----CAGCTGCCTCTTCGCTCA----- morR 18 1
-----TCAGCTGCCTCTTCGCTCAAC----- morR 21 1
-----TCAGCTGCCTCTTCGCTCAA----- morR 20 1

```

>mmu-mir-1843

| Sequence                                                                             | species | len | reads |
|--------------------------------------------------------------------------------------|---------|-----|-------|
| AATATGGAGGTCTCTGTCTGACTTAGAATAGCTGGCTGAGTCTGATCGTTCACCTCCATACAACCTTAGACTCTCACTCTACTT | mirL    | 22  | 808   |
| ---ATGGAGGTCTCTGTCTGACTTA-----                                                       | mirL    | 23  | 760   |
| --TATGGAGGTCTCTGTCTGACTTA-----                                                       | mirL    | 21  | 640   |
| --TATGGAGGTCTCTGTCTGACT-----                                                         | mirL    | 19  | 338   |
| -ATATGGAGGTCTCTGTCTGACT-----                                                         | mirL    | 20  | 313   |
| ---ATGGAGGTCTCTGTCTGACTT-----                                                        | mirL    | 21  | 293   |
| --TATGGAGGTCTCTGTCTGACTT-----                                                        | mirL    | 22  | 252   |
| ---ATGGAGGTCTCTGTCTGACT-----                                                         | mirL    | 20  | 194   |
| --TATGGAGGTCTCTGTCTGACT-----                                                         | mirL    | 20  | 194   |
| -ATATGGAGGTCTCTGTCTGACT-----                                                         | mirL    | 22  | 146   |
| -ATATGGAGGTCTCTGTCTGACT-----                                                         | mirL    | 21  | 129   |
| ---ATGGAGGTCTCTGTCTGACTTAG-----                                                      | mirL    | 23  | 123   |
| ---ATGGAGGTCTCTGTCTGACT-----                                                         | mirL    | 19  | 118   |
| --TATGGAGGTCTCTGTCTGACTTAG-----                                                      | mirL    | 24  | 72    |
| ---ATGGAGGTCTCTGTCTGACT-----                                                         | mirL    | 18  | 53    |
| -ATATGGAGGTCTCTGTCTGACTTA-----                                                       | mirL    | 24  | 29    |
| ---TGGAGGTCTCTGTCTGACTTA-----                                                        | mirL    | 21  | 28    |
| -ATATGGAGGTCTCTGTCTGACTT-----                                                        | mirL    | 23  | 25    |
| --TATGGAGGTCTCTGTCTG-----                                                            | mirL    | 18  | 17    |
| AATATGGAGGTCTCTGTCTGACT-----                                                         | mirL    | 22  | 13    |
| -ATATGGAGGTCTCTGTCT-----                                                             | mirL    | 18  | 9     |
| AATATGGAGGTCTCTGTCTGACT-----                                                         | mirL    | 21  | 9     |
| ---ATGGAGGTCTCTGTCTGACTTAGA-----                                                     | mirL    | 24  | 7     |
| -ATATGGAGGTCTCTGTCTG-----                                                            | mirL    | 19  | 7     |
| ----GGAGGTCTCTGTCTGACTTA-----                                                        | mirL    | 20  | 5     |
| ---TGGAGGTCTCTGTCTGACTT-----                                                         | mirL    | 20  | 4     |
| ----GGAGGTCTCTGTCTGACT-----                                                          | mirL    | 18  | 3     |
| AATATGGAGGTCTCTGTCTGACT-----                                                         | mirL    | 23  | 2     |
| ----TGGAGGTCTCTGTCTGACT-----                                                         | mirL    | 19  | 2     |
| ---TGGAGGTCTCTGTCTGACTTAG-----                                                       | mirL    | 22  | 2     |
| AATATGGAGGTCTCTGTCT-----                                                             | mirL    | 18  | 1     |
| AATATGGAGGTCTCTGTCTGACTTA-----                                                       | mirL    | 25  | 1     |
| ----GGAGGTCTCTGTCTGACTT-----                                                         | mirL    | 19  | 1     |
| -----TCTGATCGTTCACCTCCATAC-----                                                      | mirR    | 21  | 3124  |
| -----TCTGATCGTTCACCTCCATACA-----                                                     | mirR    | 22  | 1881  |
| -----TCTGATCGTTCACCTCCATACAA-----                                                    | mirR    | 23  | 326   |
| -----TCTGATCGTTCACCTCCAT-----                                                        | mirR    | 19  | 299   |
| -----TCTGATCGTTCACCTCCATA-----                                                       | mirR    | 20  | 273   |
| -----TCTGATCGTTCACCTCCATACAAC-----                                                   | mirR    | 24  | 202   |
| -----GTCTGATCGTTCACCTCCATAC-----                                                     | mirR    | 22  | 191   |
| -----AGTCTGATCGTTCACCTCCATAC-----                                                    | mirR    | 23  | 146   |
| -----TCTGATCGTTCACCTCCA-----                                                         | mirR    | 18  | 105   |
| -----CTGATCGTTCACCTCCATAC-----                                                       | mirR    | 20  | 74    |



```

-----AGTCTGATCGTTCACCTCCAT----- mirR 21 72
-----CTGATCGTTCACCTCCATACA----- mirR 21 59
-----GTCTGATCGTTCACCTCCATACA----- mirR 23 40
-----GTCTGATCGTTCACCTCCAT----- mirR 20 35
-----AGTCTGATCGTTCACCTCC----- mirR 19 29
-----AGTCTGATCGTTCACCTCCATACA----- mirR 24 26
-----CTGATCGTTCACCTCCATACA----- mirR 22 24
-----GTCTGATCGTTCACCTCCAT----- mirR 21 23
-----AGTCTGATCGTTCACCTCCA----- mirR 20 17
-----GTCTGATCGTTCACCTCC----- mirR 18 16
-----AGTCTGATCGTTCACCTCCAT----- mirR 22 16
-----GTCTGATCGTTCACCTCCATACA----- mirR 24 12
-----CTGATCGTTCACCTCCAT----- mirR 18 11
-----CTGATCGTTCACCTCCATACA----- mirR 23 11
-----GAGTCTGATCGTTCACCTCCAT----- mirR 22 10
-----CTGATCGTTCACCTCCAT----- mirR 19 9
-----GTCTGATCGTTCACCTCCA----- mirR 19 8
-----AGTCTGATCGTTCACCTC----- mirR 18 5
-----GAGTCTGATCGTTCACCTCC----- mirR 20 4
-----TGATCGTTCACCTCCATACA----- mirR 21 3
-----TGATCGTTCACCTCCATAC----- mirR 19 2
-----GAGTCTGATCGTTCACCTCCA----- mirR 21 2
-----GATCGTTCACCTCCATACAACC----- mirR 22 1
-----TGATCGTTCACCTCCATACAAC----- mirR 22 1
-----GAGTCTGATCGTTCACCTCCATAC----- mirR 24 1
-----TGATCGTTCACCTCCATACA----- mirR 20 1
-----GAGTCTGATCGTTCACCT----- mirR 18 1
-----GATCGTTCACCTCCATAC----- mirR 18 1
-----GATCGTTCACCTCCATACAAC----- mirR 21 1
-----TGATCGTTCACCTCCATACA----- mirR 18 1
-----CTTAGACTCTCACTCTACT----- morR 19 2
-----CAACCTTAGACTCTCACT----- morR 19 1
-----CAACCTTAGACTCTCACT----- morR 18 1
-----ACCTTAGACTCTCACTCTACT----- morR 22 1

```

>mmu-mir-374

```

GAAATCCTACTCGGGTGGATATAAACAACCTGCTAAGTGTCTAGCACTTAGCAGGTTGTATTATCATTGTCCGAGGTTATGGCTCTCGTCT species len reads
---ATCCTACTCGGGTGGATA----- morL 18 1
GAAATCCTACTCGGGTGGAT----- morL 20 1
-----ATATAAACAACCTGCTAAGTG----- mirL 22 1886
-----ATATAAACAACCTGCTAAGTGT----- mirL 23 1309
-----ATATAAACAACCTGCTAAGT----- mirL 21 618
-----ATATAAACAACCTGCTAAG----- mirL 20 614
-----ATATAAACAACCTGCTAA----- mirL 19 174
-----ATATAAACAACCTGCTAAGTGT----- mirL 24 144
-----ATATAAACAACCTGCTA----- mirL 18 98

```

```

-----TATAATACAACCTGCTAA----- mirL 18 14
-----TAATACAACCTGCTAAGTGTTC----- mirL 22 3
-----TAATACAACCTGCTAAGTGTTC----- mirL 23 3
-----TATAATACAACCTGCTAAG----- mirL 19 3
-----TATAATACAACCTGCTAAGTG----- mirL 21 2
-----GATATAATACAACCTGCTAAGT----- mirL 22 1
-----ATAATACAACCTGCTAAGT----- mirL 19 1
-----GATATAATACAACCTGCTAAG----- mirL 21 1
-----GGTTGTATTATCATTGTCCGA----- mirR 21 3534
-----GGTTGTATTATCATTGTCCG----- mirR 20 1573
-----GGTTGTATTATCATTGTCC----- mirR 19 646
-----GGTTGTATTATCATTGTCC----- mirR 18 298
-----GGTTGTATTATCATTGTCCGAG----- mirR 22 234
-----GGTTGTATTATCATTGTCCGAGG----- mirR 23 51
-----TGTATTATCATTGTCCGA----- mirR 18 22
-----GTTGTATTATCATTGTCC----- mirR 18 12
-----GTTGTATTATCATTGTCCGA----- mirR 20 12
-----GGTTGTATTATCATTGTCCGAGGT----- mirR 24 10
-----GCAGGTTGTATTATCATT----- mirR 18 10
-----GTTGTATTATCATTGTCCG----- mirR 19 9
-----TTGTATTATCATTGTCCG----- mirR 18 4
-----AGGTTGTATTATCATTGTCCGA----- mirR 22 3
-----TGTATTATCATTGTCCGAG----- mirR 19 2
-----CAGGTTGTATTATCATTG----- mirR 18 1
-----AGGTTGTATTATCATTGTCCG----- mirR 21 1
-----AGGTTGTATTATCATTGTCCGAG----- mirR 23 1
-----GCAGGTTGTATTATCATTG----- mirR 19 1
-----TTGTATTATCATTGTCCGA----- mirR 19 1
-----CGAGGTTATGGCTCTCGT-- morR 18 1
-----AGGTTATGGCTCTCGTCT morR 18 1

>mmu-mir-146b
GAGAACTTTGGCCACCTGGCTCTGAGAACTGAATTCATAGGCTGTGAGCTCTAGCAGACGCCCTAGGGACTCAGTTCTGGTGCCCGGCTGTGCTATACCATCAA species len reads
GAGAACTTTGGCCACCTGG----- morL 19 2
-----TGAGAACTGAATTCATAGGCTGT----- mirL 24 2922
-----TGAGAACTGAATTCATAGGCTG----- mirL 23 1911
-----TGAGAACTGAATTCATAGGC----- mirL 21 1589
-----TGAGAACTGAATTCATAGGCT----- mirL 22 1434
-----TGAGAACTGAATTCATAGGCTGTG----- mirL 25 818
-----TGAGAACTGAATTCATA----- mirL 18 766
-----TGAGAACTGAATTCATAG----- mirL 19 627
-----GAGAACTGAATTCATAGGCTGT----- mirL 23 147
-----GAGAACTGAATTCATAGGCTG----- mirL 22 103
-----GAGAACTGAATTCATAGGCT----- mirL 21 91
-----AGAACTGAATTCATAGGCTG----- mirL 21 73
-----GAGAACTGAATTCATAGGC----- mirL 20 56

```

```

-----AGAACTGAATCCATAGGCT----- mirL 20 47
-----GAGAACTGAATCCATAG----- mirL 18 45
-----AGAACTGAATCCATAGGCTGT----- mirL 22 44
-----GAGAACTGAATCCATAGGCTGTG----- mirL 24 38
-----GAACTGAATCCATAGGCT----- mirL 19 38
-----GAACTGAATCCATAGGCTGT----- mirL 21 22
-----GAACTGAATCCATAGGCTG----- mirL 20 21
-----AGAACTGAATCCATAGGC----- mirL 19 19
-----GAGAACTGAATCCATAGG----- mirL 19 14
-----GAACTGAATCCATAGGC----- mirL 18 9
-----AGAACTGAATCCATAGGCTGTG----- mirL 23 4
-----AGAACTGAATCCATAGG----- mirL 18 3
-----AGAACTGAATCCATAGGCTGTGA----- mirL 24 3
-----GAACTGAATCCATAGGCTGTG----- mirL 22 3
-----CTGAGAACTGAATCCATAGGC----- mirL 22 3
-----CTGAGAACTGAATCCATAGGCTG----- mirL 24 2
-----GAACTGAATCCATAGGCTGTGA----- mirL 23 2
-----CTGAGAACTGAATCCATAGG----- mirL 21 1
-----CTGAGAACTGAATCCATAGGCTGT----- mirL 25 1
-----CTGAGAACTGAATCCATAG----- mirL 20 1
-----CTGAGAACTGAATCCATAGGCT----- mirL 23 1
-----GCCCTAGGGACTCAGTTCTGGT----- mirR 22 123
-----GCCCTAGGGACTCAGTTCTGGTG----- mirR 23 83
-----GCCCTAGGGACTCAGTTCTG----- mirR 20 28
-----GCCCTAGGGACTCAGTTCTGGTGC----- mirR 24 28
-----GCCCTAGGGACTCAGTTCT----- mirR 19 17
-----GCCCTAGGGACTCAGTTCTGG----- mirR 21 16
-----GCCCTAGGGACTCAGTTCTGGTGCC----- mirR 25 12
-----CCTAGGGACTCAGTTCTGG----- mirR 19 7
-----CCCTAGGGACTCAGTTCTGG----- mirR 20 5
-----CTAGGGACTCAGTTCTGG----- mirR 18 4
-----CCTAGGGACTCAGTTCTGGTG----- mirR 21 4
-----CTAGGGACTCAGTTCTGGT----- mirR 19 3
-----CCCTAGGGACTCAGTTCTGGTGC----- mirR 23 3
-----CCTAGGGACTCAGTTCTG----- mirR 18 2
-----CCTAGGGACTCAGTTCTGGT----- mirR 20 2
-----CCTAGGGACTCAGTTCTGGTGC----- mirR 22 2
-----CCCTAGGGACTCAGTTCT----- mirR 18 1
-----CGCCCTAGGGACTCAGTTCTGG----- mirR 22 1
-----CCCTAGGGACTCAGTTCTGGTG----- mirR 22 1
-----GGTGCCCGGCTGTGCTATA----- morR 19 1
-----CCCGGCTGTGCTATACCAT----- morR 19 1
-----CGGCTGTGCTATACCATCAA morR 20 1

```

>mmu-mir-146a

TCTGTGTATCCCCAGCTCTGAGAACTGAATCCATGGTTATATCAATGTCAGACCTGTGAAATTCAGTTCTTCAGCTGGGATAGCTCTGTGCATCACGGACCTGAAGAA species len reads

|                                     |              |
|-------------------------------------|--------------|
| --TGTGTGTATCCCCAGCTC--              | mirL 18 1    |
| TCTGTGTGTATCCCCAGC                  | mirL 18 1    |
| -CTGTGTGTATCCCCAGCTC-               | mirL 19 1    |
| -----TGAGAACTGAATTCATGGGTTA-----    | mirL 23 5846 |
| -----TGAGAACTGAATTCATGGGTT-----     | mirL 22 1032 |
| -----TGAGAACTGAATTCATGGGTTAT-----   | mirL 24 844  |
| -----TGAGAACTGAATTCATGGGT-----      | mirL 21 747  |
| -----AGAACTGAATTCATGGGTTA-----      | mirL 21 481  |
| -----TGAGAACTGAATTCATGG-----        | mirL 19 433  |
| -----GAGAACTGAATTCATGGGTTA-----     | mirL 22 431  |
| -----TGAGAACTGAATTCATGGG-----       | mirL 20 408  |
| -----TGAGAACTGAATTCATG-----         | mirL 18 219  |
| -----GAACTGAATTCATGGGTTA-----       | mirL 20 150  |
| -----GAGAACTGAATTCATGGGTT-----      | mirL 21 88   |
| -----AGAACTGAATTCATGGGTT-----       | mirL 20 50   |
| -----GAGAACTGAATTCATGGGTTAT-----    | mirL 23 39   |
| -----GAGAACTGAATTCATGGGT-----       | mirL 20 38   |
| -----AGAACTGAATTCATGGGT-----        | mirL 19 33   |
| -----CTGAGAACTGAATTCATGGGT-----     | mirL 22 31   |
| -----GAACTGAATTCATGGGTT-----        | mirL 19 30   |
| -----AGAACTGAATTCATGGGTTAT-----     | mirL 22 29   |
| -----GAGAACTGAATTCATGG-----         | mirL 18 20   |
| -----CTGAGAACTGAATTCATGGGTTA-----   | mirL 24 19   |
| -----GAGAACTGAATTCATGGG-----        | mirL 19 19   |
| -----CTGAGAACTGAATTCATGGGTT-----    | mirL 23 16   |
| -----GAACTGAATTCATGGGT-----         | mirL 18 11   |
| -----GAGAACTGAATTCATGGGTTATA-----   | mirL 24 10   |
| -----GAACTGAATTCATGGGTTAT-----      | mirL 21 10   |
| -----CTGAGAACTGAATTCATGGG-----      | mirL 21 8    |
| -----CTGAGAACTGAATTCATGGGTTAT-----  | mirL 25 8    |
| -----AGAACTGAATTCATGGG-----         | mirL 18 6    |
| -----CTGAGAACTGAATTCATGG-----       | mirL 20 4    |
| -----AGAACTGAATTCATGGGTTATAT-----   | mirL 24 2    |
| -----AGAACTGAATTCATGGGTTATA-----    | mirL 23 1    |
| -----CTGAGAACTGAATTCATGGGTTATA----- | mirL 26 1    |
| -----GAACTGAATTCATGGGTTATA-----     | mirL 22 1    |
| -----TCTTCAGCTGGGATAGCT-----        | mirR 18 42   |
| -----TCTTCAGCTGGGATAGCTC-----       | mirR 19 25   |
| -----TCTTCAGCTGGGATAGCTCT-----      | mirR 20 16   |
| -----TCTTCAGCTGGGATAGCTCTGT-----    | mirR 22 5    |
| -----TCTTCAGCTGGGATAGCTCTG-----     | mirR 21 4    |
| -----CTTCAGCTGGGATAGCTC-----        | mirR 18 1    |
| -----CTCTGTCAACACGGACCTG-----       | morR 19 1    |
| -----TCATCACGGACCTGAAGAA-----       | morR 19 1    |
| -----TGTCATCACGGACCTGAAGA-----      | morR 20 1    |

```

>mmu-mir-181d
TTAACATTCATTGTTGTTCGGTGGGTTGTGAGGAGGCAGCCAGACCCACCGGGGGATGAATGTCACGTGGCTGGGCCAA species len reads
--AACATTCATTGTTGTTCGGTGGGTTG----- mirL 25 2655
--AACATTCATTGTTGTTCGGTGGGTT----- mirL 23 2557
--AACATTCATTGTTGTTCGGTGGGTT----- mirL 24 2236
--AACATTCATTGTTGTTCGGTGGGTT----- mirL 22 883
--AACATTCATTGTTGTTCGGTGGGTTGT----- mirL 26 856
--AACATTCATTGTTGTTCGGTGG----- mirL 21 842
--AACATTCATTGTTGTTCGGTG----- mirL 20 629
---ACATTCATTGTTGTTCGGTGGGTT----- mirL 23 68
---ACATTCATTGTTGTTCGGTGGGTTG----- mirL 24 47
----ATTCATTGTTGTTCGGTGGGTT----- mirL 21 37
---ACATTCATTGTTGTTCGGTGGGTT----- mirL 22 36
----CATTCATTGTTGTTCGGTGGGTT----- mirL 21 34
----CATTCATTGTTGTTCGGTGGGTT----- mirL 22 32
----ATTCATTGTTGTTCGGTGGGTTG----- mirL 22 23
----ATTCATTGTTGTTCGGTGGGTT----- mirL 20 23
---ACATTCATTGTTGTTCGGTG----- mirL 19 15
---CATTCATTGTTGTTCGGTGGGTTG----- mirL 23 15
---ACATTCATTGTTGTTCGGTG----- mirL 20 13
---ACATTCATTGTTGTTCGGTGGGTTGT----- mirL 25 12
---ACATTCATTGTTGTTCGGTGGGTT----- mirL 21 9
----CATTCATTGTTGTTCGGTGGGTT----- mirL 20 5
----ATTCATTGTTGTTCGGTGGGTTGT----- mirL 23 4
-TAACATTCATTGTTGTTCG----- mirL 18 3
-TAACATTCATTGTTGTTCGGTGGG----- mirL 23 3
----CATTCATTGTTGTTCGGTGG----- mirL 19 2
----ATTCATTGTTGTTCGGTGGG----- mirL 19 2
-TAACATTCATTGTTGTTCGGTGGGTT----- mirL 24 2
-TAACATTCATTGTTGTTCGGTG----- mirL 21 2
-TAACATTCATTGTTGTTCGGTGGGTTGT----- mirL 27 1
----ATTCATTGTTGTTCGGTGGGTTGTGA----- mirL 25 1
---CATTCATTGTTGTTCGGTG----- mirL 18 1
-TAACATTCATTGTTGTTCGGTGG----- mirL 22 1
-TAACATTCATTGTTGTTCGG----- mirL 19 1
----CATTCATTGTTGTTCGGTGGGTTGT----- mirL 24 1
----ATTCATTGTTGTTCGGTGG----- mirL 18 1
TTAACATTCATTGTTGTTCG----- mirL 19 1
-----TGAGGAGGCAGCCAGACCC----- loop 19 1
-----TGTGAGGAGGCAGCCAGA----- loop 18 1
-----CCCACCGGGGGATGAATGTCA----- mirR 21 24
-----CCACCGGGGGATGAATGTAC----- mirR 21 10
-----CCACCGGGGGATGAATGTCA----- mirR 20 7
-----CCACCGGGGGATGAATGTC----- mirR 19 4
-----CCCACCGGGGGATGAATGT----- mirR 19 3
-----ACCACCGGGGGATGAATGTCA----- mirR 22 2

```

```

-----CCACCGGGGGATGAATGTCACTG----- mirR 23 2
-----CCACCGGGGGATGAATGTCACT----- mirR 22 2
-----CCCACCGGGGGATGAATGTC----- mirR 20 2
-----CCCACCGGGGGATGAATGTCAC----- mirR 22 1
-----ACCCACCGGGGGATGAATGTCAC----- mirR 23 1
-----ACCCACCGGGGGATGAATGT----- mirR 20 1
-----CCACCGGGGGATGAATGT----- mirR 18 1
-----TCACTGTGGCTGGGCCAA morR 18 1

```

>mmu-mir-200a

| GCATCTTACCGGACAGTGCCTGGATTCTTGGCTTGACTCTAACACTGTCTGGTAACGATGTTCAAAGGTGACCCACCATT | species | len  | reads |
|----------------------------------------------------------------------------------|---------|------|-------|
| -CATCTTACCGGACAGTGCCTGGA-----                                                    | mirL 22 | 478  |       |
| -CATCTTACCGGACAGTGCCTGG-----                                                     | mirL 21 | 380  |       |
| -CATCTTACCGGACAGTGCCTG-----                                                      | mirL 20 | 152  |       |
| -CATCTTACCGGACAGTGCCTGGAT-----                                                   | mirL 23 | 126  |       |
| -CATCTTACCGGACAGTGC-----                                                         | mirL 18 | 36   |       |
| -CATCTTACCGGACAGTGCCT-----                                                       | mirL 19 | 29   |       |
| --ATCTTACCGGACAGTGCCTGGA-----                                                    | mirL 21 | 20   |       |
| ---CTTACCGGACAGTGCCTGGA-----                                                     | mirL 19 | 10   |       |
| -CATCTTACCGGACAGTGCCTGGATT-----                                                  | mirL 24 | 7    |       |
| ---TCTTACCGGACAGTGCCTGGA-----                                                    | mirL 20 | 4    |       |
| --ATCTTACCGGACAGTGCCTGG-----                                                     | mirL 20 | 4    |       |
| ---CTTACCGGACAGTGCCTGG-----                                                      | mirL 18 | 3    |       |
| ---TCTTACCGGACAGTGCCTGG-----                                                     | mirL 19 | 2    |       |
| ---CTTACCGGACAGTGCCTGGAT-----                                                    | mirL 20 | 2    |       |
| --ATCTTACCGGACAGTGCCTGGAT-----                                                   | mirL 22 | 1    |       |
| --ATCTTACCGGACAGTGCCTG-----                                                      | mirL 19 | 1    |       |
| GCATCTTACCGGACAGTGCCTGGA-----                                                    | mirL 23 | 1    |       |
| --ATCTTACCGGACAGTGCCT-----                                                       | mirL 18 | 1    |       |
| ---TCTTACCGGACAGTGCCTGGAT-----                                                   | mirL 21 | 1    |       |
| -----ATTTCTTGGCTTGACTCT-----                                                     | loop    | 18   | 1     |
| -----GATTCTTGGCTTGACTC-----                                                      | loop    | 18   | 1     |
| -----TAACACTGTCTGGTAACGATGT-----                                                 | mirR 22 | 4260 |       |
| -----TAACACTGTCTGGTAACGATGTT-----                                                | mirR 23 | 3016 |       |
| -----TAACACTGTCTGGTAACGATGTT-----                                                | mirR 24 | 550  |       |
| -----AACACTGTCTGGTAACGATGT-----                                                  | mirR 21 | 324  |       |
| -----TAACACTGTCTGGTAACGATG-----                                                  | mirR 21 | 279  |       |
| -----TAACACTGTCTGGTAACGAT-----                                                   | mirR 20 | 260  |       |
| -----AACACTGTCTGGTAACGATGTT-----                                                 | mirR 22 | 188  |       |
| -----TAACACTGTCTGGTAACGA-----                                                    | mirR 19 | 157  |       |
| -----TAACACTGTCTGGTAACG-----                                                     | mirR 18 | 113  |       |
| -----AACACTGTCTGGTAACGATGTT-----                                                 | mirR 23 | 42   |       |
| -----ACACTGTCTGGTAACGATGT-----                                                   | mirR 20 | 36   |       |
| -----CACTGTCTGGTAACGATGT-----                                                    | mirR 19 | 29   |       |
| -----AACACTGTCTGGTAACGATG-----                                                   | mirR 20 | 21   |       |
| -----AACACTGTCTGGTAACGAT-----                                                    | mirR 19 | 17   |       |

```

-----AACACTGTCTGGTAACGA----- mirR 18 12
-----AACACTGTCTGGTAACGATGTTCA----- mirR 24 10
-----ACACTGTCTGGTAACGATGTT----- mirR 21 4
-----ACACTGTCTGGTAACGAT----- mirR 18 4
-----CACTGTCTGGTAACGATGTT----- mirR 20 3
-----CACTGTCTGGTAACGATG----- mirR 18 2
-----CTAACACTGTCTGGTAACGA----- mirR 20 1
-----CTAACACTGTCTGGTAACGAT----- mirR 21 1
-----CTAACACTGTCTGGTAACG----- mirR 19 1
-----CTAACACTGTCTGGTAACGATGTT----- mirR 24 1
-----TCTAACACTGTCTGGTAACG----- mirR 20 1
-----TCTAACACTGTCTGGTAACGATGTT----- mirR 25 1
-----TTCAAAGGTGACCCACCA-- morR 18 3
-----CAAAGGTGACCCACCATT morR 18 1

```

>mmu-mir-325

```

AGAGCCGATATAGTGCTTGGTTCCCTAGTAGGTGCTCAGTAAGTGTTTGTGACATAATTCGTTTATTGAGCACCTCCTATCAATCAAGCACTGTGCTAGGCTCTGG species len reads
AGAGCCGATATAGTGCTTG----- morL 19 1
-----CCTAGTAGGTGCTCAGTAAGTGT----- mirL 23 3690
-----CCTAGTAGGTGCTCAGTAAGTG----- mirL 22 1306
-----CCTAGTAGGTGCTCAGTAA----- mirL 19 773
-----CCTAGTAGGTGCTCAGTAAG----- mirL 20 657
-----CCTAGTAGGTGCTCAGTAAGT----- mirL 21 626
-----CCTAGTAGGTGCTCAGTAAGTGTT----- mirL 24 354
-----CCTAGTAGGTGCTCAGTAAGTGT----- mirL 25 143
-----CTAGTAGGTGCTCAGTAAGTGT----- mirL 22 59
-----CTAGTAGGTGCTCAGTAAGTG----- mirL 21 44
-----AGTAGGTGCTCAGTAAGTGT----- mirL 20 43
-----AGTAGGTGCTCAGTAAGTG----- mirL 19 28
-----TAGTAGGTGCTCAGTAAGTG----- mirL 20 15
-----CTAGTAGGTGCTCAGTAAG----- mirL 19 14
-----TAGTAGGTGCTCAGTAAGTGT----- mirL 21 11
-----CTAGTAGGTGCTCAGTAA----- mirL 18 10
-----CTAGTAGGTGCTCAGTAAGT----- mirL 20 8
-----AGTAGGTGCTCAGTAAGTGTT----- mirL 21 6
-----CTAGTAGGTGCTCAGTAAGTGTT----- mirL 23 5
-----AGTAGGTGCTCAGTAAGTGT----- mirL 22 5
-----AGTAGGTGCTCAGTAAGT----- mirL 18 3
-----TAGTAGGTGCTCAGTAAGT----- mirL 19 2
-----TAGTAGGTGCTCAGTAAGTGT----- mirL 22 1
-----TCCTAGTAGGTGCTCAGT----- mirL 18 1
-----CTAGTAGGTGCTCAGTAAGTGT----- mirL 28 1
-----TCCTAGTAGGTGCTCAGTAAGTGT----- mirL 24 1
-----TCCTAGTAGGTGCTCAGTAAGTG----- mirL 23 1
-----TCCTAGTAGGTGCTCAGTAA----- mirL 20 1
-----TTTGTGACATAATTCGTT----- loop 19 1

```

```

-----TTTATTGAGCACCTCCTATCA----- mirR 21 802
-----TTTATTGAGCACCTCCTATCAA----- mirR 22 723
-----TTTATTGAGCACCTCCTATC----- mirR 20 410
-----TTTATTGAGCACCTCCTAT----- mirR 19 148
-----TTTATTGAGCACCTCCTA----- mirR 18 132
-----TTATTGAGCACCTCCTATCA----- mirR 20 93
-----TTATTGAGCACCTCCTATCAA----- mirR 21 60
-----TTTATTGAGCACCTCCTATCAAT----- mirR 23 46
-----TTATTGAGCACCTCCTATC----- mirR 19 41
-----ATTGAGCACCTCCTATCAA----- mirR 19 28
-----TATTGAGCACCTCCTATCAA----- mirR 20 21
-----ATTGAGCACCTCCTATCA----- mirR 18 20
-----TTATTGAGCACCTCCTAT----- mirR 18 17
-----TTTATTGAGCACCTCCTATCAATC----- mirR 24 16
-----TATTGAGCACCTCCTATCA----- mirR 19 14
-----TTATTGAGCACCTCCTATCAAT----- mirR 22 10
-----TTATTGAGCACCTCCTATCAATC----- mirR 23 5
-----TTATTGAGCACCTCCTATCAATCA----- mirR 24 4
-----GTTTATTGAGCACCTCCTATCA----- mirR 22 4
-----TATTGAGCACCTCCTATC----- mirR 18 4
-----ATTGAGCACCTCCTATCAAT----- mirR 20 2
-----GTTTATTGAGCACCTCCTATCAA----- mirR 23 1
-----TCGTTTATTGAGCACCTCCTA----- mirR 21 1
-----TATTGAGCACCTCCTATCAATC----- mirR 22 1
-----CGTTTATTGAGCACCTCC----- mirR 18 1
-----AAGCACTGTGCTAGGCTCT-- morR 19 39
-----AATCAAGCACTGTGCTAG----- morR 18 1
-----AAGCACTGTGCTAGGCTCTGG morR 21 1
-----TCAAGCACTGTGCTAGGC----- morR 18 1

```

>mmu-mir-3068

```

AGTATGCGAGAGTAATTGGAGTTCATGCAAGTCTAACCAGCTTACTCAGTAGCTGGGTGAATTGCAGTACTCCAACATTCTGCTTCCATCTGCTCAGTTCT species len reads
AGTATGCGAGAGTAATTG----- morL 18 1
-----TTGGAGTTCATGCAAGTCTA----- mirL 21 1475
-----TTGGAGTTCATGCAAGTCTAACC----- mirL 24 643
-----TTGGAGTTCATGCAAGTCTAA----- mirL 22 606
-----TTGGAGTTCATGCAAGTCTAACCA----- mirL 25 428
-----TTGGAGTTCATGCAAGTCT----- mirL 20 407
-----TTGGAGTTCATGCAAGTCTAAC----- mirL 23 279
-----TTGGAGTTCATGCAAGTCT----- mirL 19 178
-----ATTGGAGTTCATGCAAGTCTA----- mirL 22 151
-----TGGAGTTCATGCAAGTCTA----- mirL 20 140
-----TGGAGTTCATGCAAGTCTAA----- mirL 21 66
-----TGGAGTTCATGCAAGTCTAACCA----- mirL 24 57
-----TGGAGTTCATGCAAGTCTAACC----- mirL 23 57
-----ATTGGAGTTCATGCAAGTCTAA----- mirL 23 51

```



```

-----TGGAGTTCATGCAAGTTCTAAC----- mirL 22 35
-----TGGAGTTCATGCAAGTTCT----- mirL 19 29
-----ATTGGAGTTCATGCAAGTTCT----- mirL 21 26
-----ATTGGAGTTCATGCAAGTTCTAAC----- mirL 25 23
-----ATTGGAGTTCATGCAAGTTCTAAC----- mirL 24 11
-----ATTGGAGTTCATGCAAGTTC----- mirL 20 7
-----TGGAGTTCATGCAAGTTC----- mirL 18 5
-----ATTGGAGTTCATGCAAGTTCTAACCA----- mirL 26 4
-----GGAGTTCATGCAAGTTCTAAC----- mirL 22 3
-----GGAGTTCATGCAAGTTCTAAC----- mirL 21 2
-----AATTGGAGTTCATGCAAGT----- mirL 19 1
-----GGAGTTCATGCAAGTTCTA----- mirL 19 1
-----AATTGGAGTTCATGCAAGTTC----- mirL 21 1
-----GAGTTCATGCAAGTTCTAA----- mirL 19 1
-----AATTGGAGTTCATGCAAGTT----- mirL 20 1
-----ACCAGCTTACTCAGTAGC----- loop 18 2
-----GGTGAATTGCAGTACTCCAACA----- mirR 22 2312
-----GGTGAATTGCAGTACTCCAACAT----- mirR 23 965
-----GGTGAATTGCAGTACTCCA----- mirR 20 554
-----GGTGAATTGCAGTACTCCAAC----- mirR 21 355
-----GGTGAATTGCAGTACTCCA----- mirR 19 282
-----GTGAATTGCAGTACTCCAACAT----- mirR 22 256
-----GTGAATTGCAGTACTCCAACA----- mirR 21 250
-----GGTGAATTGCAGTACTCCAACATT----- mirR 24 113
-----TGAATTGCAGTACTCCAACAT----- mirR 21 80
-----GTGAATTGCAGTACTCCAAC----- mirR 20 55
-----GGTGAATTGCAGTACTCC----- mirR 18 53
-----GTGAATTGCAGTACTCCA----- mirR 19 37
-----TGGGTGAATTGCAGTACTCCAA----- mirR 22 21
-----GTGAATTGCAGTACTCCAACATT----- mirR 23 14
-----TGGGTGAATTGCAGTACTCCA----- mirR 21 13
-----TGGGTGAATTGCAGTACTCC----- mirR 20 10
-----GGGTGAATTGCAGTACTCCA----- mirR 20 10
-----GTGAATTGCAGTACTCCA----- mirR 18 10
-----TGAATTGCAGTACTCCAAC----- mirR 19 10
-----TGAATTGCAGTACTCCAACATTC----- mirR 23 9
-----TGAATTGCAGTACTCCAACA----- mirR 20 7
-----TGAATTGCAGTACTCCAACATT----- mirR 22 6
-----GGGTGAATTGCAGTACTCCAAC----- mirR 22 6
-----GGGTGAATTGCAGTACTCCA----- mirR 21 5
-----GGGTGAATTGCAGTACTCCAACA----- mirR 23 4
-----GAATTGCAGTACTCCAACATTC----- mirR 22 4
-----GGGTGAATTGCAGTACTCC----- mirR 19 3
-----TGGGTGAATTGCAGTACTC----- mirR 19 3
-----GAATTGCAGTACTCCAACAT----- mirR 20 3
-----GAATTGCAGTACTCCAACA----- mirR 19 3

```

```

-----GAATTGCAGTACTCCAAC----- mirR 18 3
-----TGGGTGAATTGCAGTACTCCAAC----- mirR 23 2
-----GTGAATTGCAGTACTCCAACATTC----- mirR 24 2
-----GGGTGAATTGCAGTACTCCAACAT----- mirR 24 2
-----CTGGGTGAATTGCAGTACTCCAACATTC----- mirR 28 1
-----CTGGGTGAATTGCAGTACTCCAAC----- mirR 23 1
-----CTGGGTGAATTGCAGTACTCCA----- mirR 22 1
-----CTGGGTGAATTGCAGTACTCCAACATTCT----- mirR 29 1
-----TGGGTGAATTGCAGTACTCCAACA----- mirR 24 1
-----GAATTGCAGTACTCCAACATTCT----- mirR 23 1
-----TGCTTCCATCTGCTCAGTTCT morR 21 1
-----TTCTGCTTCCATCTGCTC----- morR 18 1
-----ACATTCTGCTTCCATCTGC----- morR 19 1

>mmu-mir-1264
TTCTTCATGCCTGGCATATAGCAGGTCCTCAATAAGTATTTGTTGAAAAATAAATGAAGCAACAAATCTTATTTGAGCACCTGTTATGTGGAGGATAAAAACTA species len reads
TTCTTCATGCCTGGCATATA----- morL 20 1
-----AGGTCCTCAATAAGTATTTGTT----- mirL 22 266
-----AGGTCCTCAATAAGTATTTGT----- mirL 21 260
-----AGGTCCTCAATAAGTATTTGTTG----- mirL 23 152
-----AGGTCCTCAATAAGTATTTG----- mirL 20 67
-----AGGTCCTCAATAAGTATTT----- mirL 19 33
-----AGGTCCTCAATAAGTATTTGTTGA----- mirL 24 18
-----AGGTCCTCAATAAGTATTT----- mirL 18 17
-----CAGGTCCTCAATAAGTATTTGT----- mirL 22 2
-----CAGGTCCTCAATAAGTATTTGTTG----- mirL 24 1
-----GTCCTCAATAAGTATTTG----- mirL 18 1
-----GAAAAATAAATGAAGCAA----- loop 19 1
-----CAAATCTTATTTGAGCACCTGT----- mirR 22 4596
-----ACAAATCTTATTTGAGCACCTGT----- mirR 23 2386
-----ACAAATCTTATTTGAGCACCTG----- mirR 22 507
-----CAAATCTTATTTGAGCACCTGTT----- mirR 23 253
-----CAAATCTTATTTGAGCACCTG----- mirR 21 245
-----ACAAATCTTATTTGAGCACCT----- mirR 20 206
-----CAAATCTTATTTGAGCACCT----- mirR 19 165
-----ACAAATCTTATTTGAGCACCT----- mirR 21 125
-----ACAAATCTTATTTGAGCACCTGTT----- mirR 24 117
-----CAAATCTTATTTGAGCAC----- mirR 18 74
-----AAATCTTATTTGAGCACCTGT----- mirR 21 71
-----CAAATCTTATTTGAGCACCT----- mirR 20 70
-----ACAAATCTTATTTGAGCAC----- mirR 19 67
-----AAATCTTATTTGAGCACCTGTT----- mirR 22 64
-----AAATCTTATTTGAGCACCTGTTA----- mirR 23 48
-----CAAATCTTATTTGAGCACCTGTTA----- mirR 24 40
-----AATCTTATTTGAGCACCTGTTA----- mirR 22 27
-----ACAAATCTTATTTGAGCACCTGTTA----- mirR 25 13

```

```

-----AAATCTTATTTGAGCACCC----- mirR 18 9
-----AAATCTTATTTGAGCACCT----- mirR 19 6
-----AATCTTATTTGAGCACCTGTT----- mirR 21 4
-----AAATCTTATTTGAGCACCTG----- mirR 20 4
-----AATCTTATTTGAGCACCTGT----- mirR 20 4
-----AACAAATCTTATTTGAGCACCTG----- mirR 23 3
-----ATCTTATTTGAGCACCTGT----- mirR 19 3
-----AACAAATCTTATTTGAGCACCTGT----- mirR 24 3
-----AACAAATCTTATTTGAGCACCTGTT----- mirR 25 2
-----ATCTTATTTGAGCACCTGTT----- mirR 20 2
-----AACAAATCTTATTTGAGCACCT----- mirR 22 2
-----AATCTTATTTGAGCACCT----- mirR 18 1
-----AAATCTTATTTGAGCACCTGTTAT----- mirR 24 1
-----AATCTTATTTGAGCACCTGTTAT----- mirR 23 1
-----TGTGGAGGATAAAAAACTA morR 19 1
-----GTTATGTGGAGGATAAAAA----- morR 18 1
-----ATGTGGAGGATAAAAAAC-- morR 18 1

```

>mmu-mir-190

```

TTTTCTGCAGGCCTCTGTGTGATATGTTTGATATATTAGGTTGTTATTTAATCCAACATATATCAAGCATATTCCTACAGTGTCTTGCCTGT species len reads
--TTCTGCAGGCCTCTGTGTG----- morL 19 1
TTTTCTGCAGGCCTCTGT----- morL 18 1
-----TGATATGTTTGATATATTAGGTT----- mirL 23 3779
-----TGATATGTTTGATATATTAGGT----- mirL 22 1304
-----TGATATGTTTGATATATTAGGTTG----- mirL 24 1124
-----GATATGTTTGATATATTAGGTT----- mirL 22 195
-----TGATATGTTTGATATATTAG----- mirL 20 185
-----TGATATGTTTGATATATTAGG----- mirL 21 168
-----TGATATGTTTGATATATTA----- mirL 19 118
-----GATATGTTTGATATATTAGGT----- mirL 21 77
-----GATATGTTTGATATATTAGGTTG----- mirL 23 58
-----TGATATGTTTGATATATTAGGTTGT----- mirL 25 55
-----GATATGTTTGATATATTAGG----- mirL 20 10
-----GATATGTTTGATATATTAG----- mirL 19 10
-----GATATGTTTGATATATTA----- mirL 18 9
-----GATATGTTTGATATATTAGGTTGT----- mirL 24 6
-----ATATGTTTGATATATTAG----- mirL 18 2
-----TATGTTTGATATATTAGGTT----- mirL 20 2
-----ATATGTTTGATATATTAGGTTG----- mirL 22 1
-----TATGTTTGATATATTAGGTTG----- mirL 21 1
-----GTGATATGTTTGATATATTA----- mirL 20 1
-----ATATGTTTGATATATTAGGTT----- mirL 21 1
-----GTGATATGTTTGATATATTAGGTT----- mirL 24 1
-----ACTATATATCAAGCATATTCCT----- mirR 22 1134
-----ACTATATATCAAGCATATTCCTA----- mirR 23 338
-----CTATATATCAAGCATATTCCT----- mirR 21 288

```

```

-----CTATATATCAAGCATATTCCTA----- mirR 22 233
-----ACTATATATCAAGCATATTC----- mirR 21 220
-----CTATATATCAAGCATATTCCTAC----- mirR 23 197
-----ACTATATATCAAGCATATTCCTAC----- mirR 24 101
-----ACTATATATCAAGCATATT----- mirR 19 71
-----ACTATATATCAAGCATATTC----- mirR 20 59
-----CTATATATCAAGCATATTC----- mirR 20 43
-----ACTATATATCAAGCATAT----- mirR 18 41
-----CTATATATCAAGCATATTC----- mirR 19 17
-----CTATATATCAAGCATATT----- mirR 18 16
-----CTATATATCAAGCATATTCCTACA----- mirR 24 12
-----CAACTATATATCAAGCATATTCCT----- mirR 24 2
-----TATATATCAAGCATATTCCT----- mirR 20 1
-----ATATATCAAGCATATTCCTA----- mirR 20 1
-----AACTATATATCAAGCATATTCCTA----- mirR 24 1
-----AACTATATATCAAGCATATTCCTAC----- mirR 25 1
-----ATATATCAAGCATATTC----- mirR 18 1
-----AACTATATATCAAGCATATTCCT----- mirR 23 1
-----CCTACAGTGTCTTGCCCTGT morR 20 1
-----CTACAGTGTCTTGCCCTG- morR 18 1

```

>mmu-mir-19a

```

TTGTGTTTGCAGCCCTCTGTAGTTTTGCATAGTTGCACTACAAGAAGAATGTAGTTGTGCAAATCTATGCAAACCTGATGGTGGCCCTGCTATT species len reads
----GTTTGCAGCCCTCTGTTA----- morL 18 1
TTGTGTTTGCAGCCCTCT----- morL 18 1
-TGTGTTTGCAGCCCTCTG----- morL 18 1
-----AGTTTTGCATAGTTGCACTACA----- mirL 22 187
-----AGTTTTGCATAGTTGCACTA----- mirL 20 96
-----TAGTTTTGCATAGTTGCACTA----- mirL 21 91
-----AGTTTTGCATAGTTGCACTACAA----- mirL 23 57
-----TAGTTTTGCATAGTTGCACT----- mirL 20 49
-----AGTTTTGCATAGTTGCACTAC----- mirL 21 36
-----TAGTTTTGCATAGTTGCACTAC----- mirL 22 17
-----AGTTTTGCATAGTTGCACT----- mirL 19 16
-----GTTTGCATAGTTGCACTA----- mirL 19 10
-----GTTTGCATAGTTGCACTACA----- mirL 21 9
-----AGTTTTGCATAGTTGCAC----- mirL 18 9
-----TTTGCATAGTTGCACTAC----- mirL 18 8
-----TAGTTTTGCATAGTTGCAC----- mirL 19 7
-----TAGTTTTGCATAGTTGCA----- mirL 18 7
-----TTTGCATAGTTGCACTACA----- mirL 19 4
-----GTTTGCATAGTTGCACT----- mirL 18 3
-----AGTTTTGCATAGTTGCACTACAAG----- mirL 24 2
-----GTTTGCATAGTTGCACTACAA----- mirL 22 2
-----TAGTTTTGCATAGTTGCACTACA----- mirL 23 1
-----TTTGCATAGTTGCACTA----- mirL 18 1

```

```

-----ACAAGAAGAATGTAGTTG----- loop 18 2
-----TGTGCAAATCTATGCAAACCTG----- mirR 22 4386
-----TGTGCAAATCTATGCAAACCTGA----- mirR 23 2140
-----TGTGCAAATCTATGCAAACCT----- mirR 21 930
-----TGTGCAAATCTATGCAAAC----- mirR 20 371
-----TGTGCAAATCTATGCAAAC----- mirR 19 216
-----GTGCAAATCTATGCAAACCTG----- mirR 21 147
-----TGTGCAAATCTATGCAAAC----- mirR 18 77
-----GTGCAAATCTATGCAAACCTGA----- mirR 22 58
-----TGTGCAAATCTATGCAAACCTGAT----- mirR 24 51
-----TTGTGCAAATCTATGCAAACCTG----- mirR 23 48
-----GCAAATCTATGCAAACCTGA----- mirR 20 32
-----TTGTGCAAATCTATGCAAACCT----- mirR 22 30
-----GTGCAAATCTATGCAAACCT----- mirR 20 29
-----GCAAATCTATGCAAACCTG----- mirR 19 23
-----TTGTGCAAATCTATGCAAACCTGA----- mirR 24 16
-----TGCAAATCTATGCAAACCTG----- mirR 20 14
-----TTGTGCAAATCTATGCAAAC----- mirR 21 11
-----GTGCAAATCTATGCAAAC----- mirR 19 10
-----GTGCAAATCTATGCAAAC----- mirR 18 9
-----TTGTGCAAATCTATGCAAACCTGAT----- mirR 25 4
-----TTGTGCAAATCTATGCAAAC----- mirR 20 3
-----TGCAAATCTATGCAAAC----- mirR 18 2
-----GTGCAAATCTATGCAAACCTGAT----- mirR 23 2
-----TTGTGCAAATCTATGCAAAC----- mirR 19 2
-----GCAAATCTATGCAAACCT----- mirR 18 2
-----GCAAATCTATGCAAACCTGAT----- mirR 21 1
-----TGCAAATCTATGCAAACCTGA----- mirR 21 1
-----TGCAAATCTATGCAAACCT----- mirR 19 1
-----TGATGGTGGCCTGCTATT morR 18 1

>mmu-mir-423
GGAAATAAAGGAAGTTAGGCTGAGGGGCAGAGAGCGAGACTTTTCTATTTTCCAAAAGCTCGGTCTGAGGCCCTCAGTCTTGCTTCCTACCCCGCG species len reads
---AATAAAGGAAGTTAGGCT----- morL 18 2
GGAAATAAAGGAAGTTAG----- morL 18 1
-----TGAGGGGCAGAGAGCGAGACTT----- mirL 22 338
-----TGAGGGGCAGAGAGCGAGACTTT----- mirL 23 330
-----TGAGGGGCAGAGAGCGAGACTTTT----- mirL 24 262
-----TGAGGGGCAGAGAGCGAGAC----- mirL 20 201
-----TGAGGGGCAGAGAGCGAGACT----- mirL 21 143
-----TGAGGGGCAGAGAGCGAGACTTTTC----- mirL 25 77
-----TGAGGGGCAGAGAGCGAGAG----- mirL 19 60
-----GAGGGGCAGAGAGCGAGACTT----- mirL 21 19
-----GAGGGGCAGAGAGCGAGACTTTT----- mirL 23 13
-----GAGGGGCAGAGAGCGAGACTTT----- mirL 22 13
-----GGGGCAGAGAGCGAGACTTT----- mirL 20 7

```

```

-----GAGGGGCAGAGAGCGAGA----- mirL 18 5
-----GAGGGGCAGAGAGCGAGACTTTTC----- mirL 24 4
-----GGGGCAGAGAGCGAGACTT----- mirL 19 4
-----AGGGGCAGAGAGCGAGACTTTTC----- mirL 23 3
-----GAGGGGCAGAGAGCGAGAC----- mirL 19 3
-----AGGGGCAGAGAGCGAGACT----- mirL 19 2
-----AGGGGCAGAGAGCGAGACTTTT----- mirL 22 2
-----GAGGGGCAGAGAGCGAGACT----- mirL 20 2
-----GGGGCAGAGAGCGAGACTTTT----- mirL 21 1
-----GCTGAGGGGCAGAGAGCGA----- mirL 19 1
-----AGGGGCAGAGAGCGAGAC----- mirL 18 1
-----GGGGCAGAGAGCGAGACT----- mirL 18 1
-----AGGGGCAGAGAGCGAGACTTT----- mirL 21 1
-----AGCTCGGTCTGAGGCCCTCAGT----- mirR 23 1872
-----AGCTCGGTCTGAGGCCCTCAGTC----- mirR 24 1228
-----AGCTCGGTCTGAGGCCCTCA----- mirR 21 1179
-----AGCTCGGTCTGAGGCCCTCAG----- mirR 22 795
-----AGCTCGGTCTGAGGCCCTC----- mirR 20 771
-----AGCTCGGTCTGAGGCCCT----- mirR 19 399
-----AGCTCGGTCTGAGGCCCC----- mirR 18 282
-----AAGCTCGGTCTGAGGCCCTCA----- mirR 22 280
-----AAGCTCGGTCTGAGGCCCTCAG----- mirR 23 203
-----AAGCTCGGTCTGAGGCCCTC----- mirR 21 190
-----AAGCTCGGTCTGAGGCCCTCAGT----- mirR 24 148
-----AAGCTCGGTCTGAGGCCCTCAGTC----- mirR 25 117
-----AAGCTCGGTCTGAGGCCCT----- mirR 20 64
-----AAGCTCGGTCTGAGGCCCC----- mirR 19 53
-----GCTCGGTCTGAGGCCCTCAGT----- mirR 22 14
-----GCTCGGTCTGAGGCCCTCAGTC----- mirR 23 5
-----TCGGTCTGAGGCCCTCAGT----- mirR 20 5
-----GCTCGGTCTGAGGCCCTCAG----- mirR 21 4
-----AAAGCTCGGTCTGAGGCCCTCAG----- mirR 24 4
-----GCTCGGTCTGAGGCCCTCAGTCTT----- mirR 25 3
-----AAAGCTCGGTCTGAGGCCCTC----- mirR 22 3
-----CTCGGTCTGAGGCCCTCAGTC----- mirR 22 2
-----GCTCGGTCTGAGGCCCT----- mirR 18 2
-----AAAGCTCGGTCTGAGGCCCTCA----- mirR 23 2
-----GCTCGGTCTGAGGCCCTC----- mirR 19 2
-----GCTCGGTCTGAGGCCCTCA----- mirR 20 1
-----CTCGGTCTGAGGCCCTCAGTCT----- mirR 23 1
-----AAAGCTCGGTCTGAGGCC----- mirR 18 1
-----CTCGGTCTGAGGCCCTCAG----- mirR 20 1
-----AAAGCTCGGTCTGAGGCCCTCAGTCT----- mirR 27 1
-----TCGGTCTGAGGCCCTCAG----- mirR 19 1
-----GTCTTGCTTCTTACCCCG----- morR 18 1
-----CTTGCTTCTTACCCCGG morR 18 1

```

```

>mmu-mir-183
GTATGGCACTGGTAGAATTCAGTGTGAACAGTCTCAGTCAGTGAATTACCGAAGGGCCATAAACAGAGCAGAGACAGATCCG species len reads
-TATGGCACTGGTAGAATTCAGT-----mirL 22 1053
-TATGGCACTGGTAGAATTCAGT-----mirL 23 996
--ATGGCACTGGTAGAATTCAGT-----mirL 22 236
-TATGGCACTGGTAGAATTCAGTGT-----mirL 24 228
-TATGGCACTGGTAGAATTCAG-----mirL 21 209
-TATGGCACTGGTAGAATTCAG-----mirL 20 202
--ATGGCACTGGTAGAATTCAGT-----mirL 21 155
--ATGGCACTGGTAGAATTCAGTGT-----mirL 23 136
---GGCACTGGTAGAATTCAGT-----mirL 20 78
-TATGGCACTGGTAGAATTCAG-----mirL 19 75
---TGGCACTGGTAGAATTCAGT-----mirL 21 56
-TATGGCACTGGTAGAATTCAG-----mirL 18 51
--ATGGCACTGGTAGAATTCAG-----mirL 20 43
---TGGCACTGGTAGAATTCAGT-----mirL 20 42
---GGCACTGGTAGAATTCAGT-----mirL 19 29
--ATGGCACTGGTAGAATTCAG-----mirL 19 28
--ATGGCACTGGTAGAATTCAGTGT-----mirL 24 22
---TGGCACTGGTAGAATTCAGT-----mirL 22 14
--ATGGCACTGGTAGAATTCAG-----mirL 18 12
---TGGCACTGGTAGAATTCAG-----mirL 19 9
---TGGCACTGGTAGAATTCAG-----mirL 18 6
---GGCACTGGTAGAATTCAG-----mirL 18 6
---GGCACTGGTAGAATTCAGTGT-----mirL 21 5
GTATGGCACTGGTAGAATTCAG-----mirL 21 2
GTATGGCACTGGTAGAATTCAGT-----mirL 24 1
-----GTGAATTACCGAAGGGCCATAA-----mirR 22 3008
-----GTGAATTACCGAAGGGCCATA-----mirR 21 794
-----GTGAATTACCGAAGGGCCAT-----mirR 20 381
-----GTGAATTACCGAAGGGCCA-----mirR 19 231
-----GAATTACCGAAGGGCCATAA-----mirR 20 213
-----TGAATTACCGAAGGGCCATAA-----mirR 21 163
-----GTGAATTACCGAAGGGCCATAAA-----mirR 23 134
-----GTGAATTACCGAAGGGCC-----mirR 18 109
-----AATTACCGAAGGGCCATAA-----mirR 19 96
-----GAATTACCGAAGGGCCATA-----mirR 19 43
-----AATTACCGAAGGGCCATA-----mirR 18 41
-----TGAATTACCGAAGGGCCATA-----mirR 20 38
-----TGAATTACCGAAGGGCCAT-----mirR 19 24
-----TGAATTACCGAAGGGCCATAAA-----mirR 22 16
-----GAATTACCGAAGGGCCAT-----mirR 18 13
-----TGAATTACCGAAGGGCCA-----mirR 18 12
-----GAATTACCGAAGGGCCATAAA-----mirR 21 9
-----TGAATTACCGAAGGGCCATAAAC-----mirR 23 6

```

C:\Documents and Settings\hong\Desktop\Hippocampus-total RNA.txt

```
-----GTGAATTACCGAAGGGCCATAAAC----- mirR 24 5
-----AATTACCGAAGGGCCATAAAA----- mirR 20 1
-----AGTGAATTACCGAAGGGCCATA----- mirR 22 1
-----TCAGTGAATTACCGAAGG----- mirR 18 1
-----AGTGAATTACCGAAGGGC----- mirR 18 1
-----AACAGAGCAGAGACAGAT--- morR 18 1
-----AGAGCAGAGACAGATCCG morR 18 1
```

>mmu-mir-148b

```
CCCTTAGCATTTGAGGTGAAGTTCTGTTATACTCAGGCTGTGGCTCTGAAAGTCAGTGCATCACAGAACTTTGTCTCGAAAGCTTTCTAGC species len reads
CCCTTAGCATTTGAGGTG----- morL 18 1
-----AAGTTCTGTTATACTCA----- mirL 19 806
-----AAGTTCTGTTATACTCAGGC----- mirL 22 460
-----AAGTTCTGTTATACTCAG----- mirL 20 286
-----AAGTTCTGTTATACTCAGGCT----- mirL 23 247
-----GAAGTTCTGTTATACTCAG----- mirL 21 239
-----GAAGTTCTGTTATACTC----- mirL 19 213
-----AAGTTCTGTTATACTCAGG----- mirL 21 168
-----AAGTTCTGTTATACTC----- mirL 18 168
-----GAAGTTCTGTTATACTCA----- mirL 20 166
-----GAAGTTCTGTTATACTCAGGC----- mirL 23 101
-----GAAGTTCTGTTATACTCAGG----- mirL 22 100
-----AGTTCTGTTATACTCA----- mirL 18 100
-----GAAGTTCTGTTATACT----- mirL 18 84
-----GTTCTGTTATACTCAG----- mirL 18 65
-----GAAGTTCTGTTATACTCAGGCT----- mirL 24 57
-----AGTTCTGTTATACTCAG----- mirL 19 42
-----AAGTTCTGTTATACTCAGGCTG----- mirL 24 37
-----AGTTCTGTTATACTCAGGC----- mirL 21 24
-----GTTCTGTTATACTCAGG----- mirL 19 22
-----AGTTCTGTTATACTCAGG----- mirL 20 20
-----GTTCTGTTATACTCAGGC----- mirL 20 12
-----GTTCTGTTATACTCAGGCT----- mirL 21 8
-----AGTTCTGTTATACTCAGGCT----- mirL 22 8
-----GTTCTGTTATACTCAGGCTG----- mirL 22 4
-----AGTTCTGTTATACTCAGGCTG----- mirL 23 4
-----TTCTGTTATACTCAGG----- mirL 18 3
-----TTCTGTTATACTCAGGC----- mirL 19 3
-----TGAAGTTCTGTTATACTCA----- mirL 21 2
-----TTCTGTTATACTCAGGCT----- mirL 20 2
-----TTCTGTTATACTCAGGCTG----- mirL 21 1
-----GTTCTGTTATACTCAGGCTGT----- mirL 23 1
-----AGTTCTGTTATACTCAGGCTGT----- mirL 24 1
-----TGAAGTTCTGTTATACTC----- mirL 20 1
-----GCTGTGGCTCTGAAAGTCA----- loop 19 7
-----CAGGCTGTGGCTCTGAAA----- loop 18 1
```



```

-----TCAGTGCATCACAGAACTTTG----- mirR 21 1504
-----TCAGTGCATCACAGAACTTTGTC----- mirR 23 1242
-----TCAGTGCATCACAGAACTTTGT----- mirR 22 1107
-----TCAGTGCATCACAGAACTTT----- mirR 20 722
-----TCAGTGCATCACAGAACTT----- mirR 19 296
-----TCAGTGCATCACAGAACTTTGTCT----- mirR 24 144
-----TCAGTGCATCACAGAACT----- mirR 18 121
-----CAGTGCATCACAGAACTTTG----- mirR 20 99
-----CAGTGCATCACAGAACTTTGT----- mirR 21 75
-----AGTGCATCACAGAACTTTG----- mirR 19 52
-----CAGTGCATCACAGAACTTTGTCT----- mirR 22 32
-----AGTGCATCACAGAACTTTGT----- mirR 20 32
-----GTGCATCACAGAACTTTG----- mirR 18 29
-----CAGTGCATCACAGAACTTT----- mirR 19 26
-----CAGTGCATCACAGAACTT----- mirR 18 11
-----CAGTGCATCACAGAACTTTGTCT----- mirR 23 10
-----AGTGCATCACAGAACTTT----- mirR 18 9
-----CAGTGCATCACAGAACTTTGTCTC----- mirR 24 5
-----AGTGCATCACAGAACTTTGTCT----- mirR 21 4
-----AGTGCATCACAGAACTTTGTCT----- mirR 22 2
-----GTGCATCACAGAACTTTGT----- mirR 19 2
-----TCTCGAAAGCTTTCTAGC morR 18 1

```

>mmu-mir-133a-2

```

AAGCCAAATGCTTTGCTGAAGCTGGTAAAATGGAACCAAATCAGCTGTTGGATGGATTGGTCCCCTTCAACCAGCTGTAGCTGCGCATTGATCAG species len reads
--GCCAAATGCTTTGCTGAA----- morL 18 1
----AAATGCTTTGCTGAAGCT----- morL 18 1
---CCAAATGCTTTGCTGAAG----- morL 18 1
AAGCCAAATGCTTTGCTGA----- morL 19 1
-----GCTGGTAAAATGGAACCAA----- mirL 20 4369
-----GCTGGTAAAATGGAACCAAAT----- mirL 21 1405
-----GCTGGTAAAATGGAACCAA----- mirL 19 668
-----GCTGGTAAAATGGAACCAAATC----- mirL 22 260
-----GCTGGTAAAATGGAACCAA----- mirL 18 203
-----AGCTGGTAAAATGGAACCAAAT----- mirL 22 52
-----AGCTGGTAAAATGGAACCAA----- mirL 20 38
-----AGCTGGTAAAATGGAACCAAATC----- mirL 23 34
-----GCTGGTAAAATGGAACCAAATCA----- mirL 23 29
-----AGCTGGTAAAATGGAACCAA----- mirL 21 27
-----CTGGTAAAATGGAACCAA----- mirL 19 21
-----TGGTAAAATGGAACCAA----- mirL 18 11
-----GGTAAAATGGAACCAAAT----- mirL 18 9
-----AGCTGGTAAAATGGAACCAA----- mirL 18 8
-----GCTGGTAAAATGGAACCAAATCAGC----- mirL 25 8
-----AGCTGGTAAAATGGAACCAAATCA----- mirL 24 7
-----CTGGTAAAATGGAACCAAAT----- mirL 20 6

```

```

-----CTGGTAAAATGGAACCAA----- mirL 18 4
-----AGCTGGTAAAATGGAACCA----- mirL 19 4
-----TGGTAAAATGGAACCAAAT----- mirL 19 4
-----GGTAAAATGGAACCAAATC----- mirL 19 2
-----TGGTAAAATGGAACCAAATC----- mirL 20 2
-----AAGCTGGTAAAATGGAACC----- mirL 19 1
-----AAGCTGGTAAAATGGAACCAA----- mirL 21 1
-----CTGGTAAAATGGAACCAAATC----- mirL 21 1
-----TTGGTCCCCTTCAACCAGCTGT----- mirR 22 451
-----TTTGGTCCCCTTCAACCAGCTG----- mirR 22 418
-----TTTGGTCCCCTTCAACCAGCTGT----- mirR 23 329
-----TTGGTCCCCTTCAACCAGCTG----- mirR 21 182
-----GGTCCCCTTCAACCAGCTG----- mirR 19 100
-----GTCCCCTTCAACCAGCTG----- mirR 18 66
-----TGGTCCCCTTCAACCAGCTG----- mirR 20 55
-----TGGTCCCCTTCAACCAGCTGT----- mirR 21 54
-----TTTGGTCCCCTTCAACCAGCTGTA----- mirR 24 40
-----TTGGTCCCCTTCAACCAGCTGTA----- mirR 23 33
-----GGTCCCCTTCAACCAGCTGT----- mirR 20 24
-----GTCCCCTTCAACCAGCTGT----- mirR 19 19
-----TGGTCCCCTTCAACCAGCTGTAG----- mirR 23 13
-----TTTGGTCCCCTTCAACCAGCTGTAG----- mirR 25 7
-----GTCCCCTTCAACCAGCTGTA----- mirR 20 4
-----TTGGTCCCCTTCAACCAGCTGTAG----- mirR 24 3
-----ATTTGGTCCCCTTCAACCAGCT----- mirR 22 2
-----TGGTCCCCTTCAACCAGCTGTA----- mirR 22 2
-----TTTGGTCCCCTTCAACCAGC----- mirR 20 1
-----TTGGTCCCCTTCAACCAGCTGTAGCTGC----- mirR 28 1
-----ATTTGGTCCCCTTCAACCAGC----- mirR 21 1
-----TTGGTCCCCTTCAACCAGCTGTAGCT----- mirR 26 1
-----ATTTGGTCCCCTTCAACCAGCTG----- mirR 23 1
-----TTGGTCCCCTTCAACCAGC----- mirR 19 1
-----AGCTGCGCATTGATCACG morR 18 1

>mmu-mir-133a-1
AGCGGCAATGCTTTGCTAAAGCTGGTAAAATGGAACCAAATCGCCTCTTCAATGGATTTGGTCCCCTTCAACCAGCTGTAGCTATGCATTGATTACACA species len reads
AGCGGCAATGCTTTGCTAAA----- morL 20 1
-----GCTGGTAAAATGGAACCAAA----- mirL 20 4369
-----GCTGGTAAAATGGAACCAAAT----- mirL 21 1405
-----GCTGGTAAAATGGAACCAA----- mirL 19 668
-----GCTGGTAAAATGGAACCAAATC----- mirL 22 260
-----GCTGGTAAAATGGAACCA----- mirL 18 203
-----AGCTGGTAAAATGGAACCAAAT----- mirL 22 52
-----AGCTGGTAAAATGGAACCAA----- mirL 20 38
-----AGCTGGTAAAATGGAACCAAATC----- mirL 23 34
-----AGCTGGTAAAATGGAACCAAA----- mirL 21 27

```

```

-----CTGGTAAAATGGAACCAAA----- mirL 19 21
-----GCTGGTAAAATGGAACCAAATCG----- mirL 23 20
-----GCTGGTAAAATGGAACCAAATCG----- mirL 24 16
-----TGGTAAAATGGAACCAAA----- mirL 18 11
-----GGTAAAATGGAACCAAAAT----- mirL 18 9
-----AGCTGGTAAAATGGAACC----- mirL 18 8
-----AGCTGGTAAAATGGAACCAAATCG----- mirL 24 7
-----CTGGTAAAATGGAACCAAAT----- mirL 20 6
-----TGGTAAAATGGAACCAAAAT----- mirL 19 4
-----CTGGTAAAATGGAACCAA----- mirL 18 4
-----AGCTGGTAAAATGGAACCA----- mirL 19 4
-----GGTAAAATGGAACCAAATC----- mirL 19 2
-----TGGTAAAATGGAACCAAATC----- mirL 20 2
-----CTGGTAAAATGGAACCAAATC----- mirL 21 1
-----AAGCTGGTAAAATGGAACC----- mirL 19 1
-----AAAGCTGGTAAAATGGAACCAA----- mirL 22 1
-----AAGCTGGTAAAATGGAACCAA----- mirL 21 1
-----GCCTCTCAATGGATTTG----- loop 18 1
-----AATCGCCTCTTCAATGGA----- loop 18 1
-----TTGGTCCCCTTCAACCAGCTGT----- mirR 22 451
-----TTTGGTCCCCTTCAACCAGCTG----- mirR 22 418
-----TTTGGTCCCCTTCAACCAGCTGT----- mirR 23 329
-----TTGGTCCCCTTCAACCAGCTG----- mirR 21 182
-----GGTCCCCTTCAACCAGCTG----- mirR 19 100
-----GTCCCCTTCAACCAGCTG----- mirR 18 66
-----TGGTCCCCTTCAACCAGCTG----- mirR 20 55
-----TGGTCCCCTTCAACCAGCTGT----- mirR 21 54
-----TTTGGTCCCCTTCAACCAGCTGTA----- mirR 24 40
-----TTGGTCCCCTTCAACCAGCTGTA----- mirR 23 33
-----GGTCCCCTTCAACCAGCTGT----- mirR 20 24
-----GTCCCCTTCAACCAGCTGT----- mirR 19 19
-----TGGTCCCCTTCAACCAGCTGTAG----- mirR 23 13
-----TTTGGTCCCCTTCAACCAGCTGTAG----- mirR 25 7
-----GTCCCCTTCAACCAGCTGTA----- mirR 20 4
-----TTGGTCCCCTTCAACCAGCTGTAG----- mirR 24 3
-----TGGTCCCCTTCAACCAGCTGTA----- mirR 22 2
-----ATTTGGTCCCCTTCAACCAGCT----- mirR 22 2
-----TTGGTCCCCTTCAACCAGC----- mirR 19 1
-----TTGGTCCCCTTCAACCAGCTGTAGC----- mirR 25 1
-----ATTTGGTCCCCTTCAACCAGCTG----- mirR 23 1
-----ATTTGGTCCCCTTCAACCAGC----- mirR 21 1
-----TTGGTCCCCTTCAACCAGCTGTAGCT----- mirR 26 1
-----TTTGGTCCCCTTCAACCAGC----- mirR 20 1
-----CTATGCATTGATTACACA morR 18 1
-----TAGCTATGCATTGATTACAC----- morR 20 1

```

>mmu-mir-351

| Sequence                                                                                    | species | len | reads |
|---------------------------------------------------------------------------------------------|---------|-----|-------|
| ATTAATCATGGCACCTCCGTTCCCTGAGGAGCCCTTTGAGCCTGGAGTGAAAAAACAAGGTCAAGAGGCGCCTGGGAAGAGTGTTAAACTT | morL    | 18  | 2     |
| -----CATGGCACCTCCGTTTC-----                                                                 | morL    | 20  | 1     |
| ATTAATCATGGCACCTCCGTT-----                                                                  | morL    | 19  | 1     |
| -----ATCATGGCACCTCCGTTTC-----                                                               | morL    | 20  | 1     |
| ---AATCATGGCACCTCCGTTTC-----                                                                | morL    | 19  | 1     |
| ---AATCATGGCACCTCCGTTT-----                                                                 | mirL    | 24  | 2821  |
| -----TCCCTGAGGAGCCCTTTGAGCCTG-----                                                          | mirL    | 25  | 2616  |
| -----TCCCTGAGGAGCCCTTTGAGCCTGG-----                                                         | mirL    | 22  | 1188  |
| -----TCCCTGAGGAGCCCTTTGAGCC-----                                                            | mirL    | 23  | 664   |
| -----TCCCTGAGGAGCCCTTTGAGCCT-----                                                           | mirL    | 20  | 413   |
| -----TCCCTGAGGAGCCCTTTGAG-----                                                              | mirL    | 19  | 325   |
| -----TCCCTGAGGAGCCCTTTGA-----                                                               | mirL    | 26  | 259   |
| -----TCCCTGAGGAGCCCTTTGAGCCTGGA-----                                                        | mirL    | 24  | 161   |
| -----CCCTGAGGAGCCCTTTGAGCCTGG-----                                                          | mirL    | 23  | 140   |
| -----CCCTGAGGAGCCCTTTGAGCCTG-----                                                           | mirL    | 23  | 64    |
| -----CCTGAGGAGCCCTTTGAGCCTGG-----                                                           | mirL    | 22  | 40    |
| -----CCTGAGGAGCCCTTTGAGCCTG-----                                                            | mirL    | 22  | 36    |
| -----CTGAGGAGCCCTTTGAGCCTGG-----                                                            | mirL    | 21  | 19    |
| -----CCCTGAGGAGCCCTTTGAGCC-----                                                             | mirL    | 21  | 17    |
| -----CTGAGGAGCCCTTTGAGCCTG-----                                                             | mirL    | 22  | 16    |
| -----CCCTGAGGAGCCCTTTGAGCCT-----                                                            | mirL    | 25  | 16    |
| -----CCCTGAGGAGCCCTTTGAGCCTGGA-----                                                         | mirL    | 18  | 13    |
| -----CCCTGAGGAGCCCTTTGA-----                                                                | mirL    | 20  | 10    |
| -----CCTGAGGAGCCCTTTGAGCC-----                                                              | mirL    | 19  | 10    |
| -----CCCTGAGGAGCCCTTTGAG-----                                                               | mirL    | 18  | 7     |
| -----CCTGAGGAGCCCTTTGAG-----                                                                | mirL    | 25  | 6     |
| -----TTCCCTGAGGAGCCCTTTGAGCCTG-----                                                         | mirL    | 24  | 5     |
| -----CCTGAGGAGCCCTTTGAGCCTGGA-----                                                          | mirL    | 21  | 5     |
| -----CCTGAGGAGCCCTTTGAGCCT-----                                                             | mirL    | 18  | 4     |
| -----CTGAGGAGCCCTTTGAGC-----                                                                | mirL    | 19  | 4     |
| -----CCTGAGGAGCCCTTTGAGC-----                                                               | mirL    | 23  | 4     |
| -----CTGAGGAGCCCTTTGAGCCTGGA-----                                                           | mirL    | 19  | 2     |
| -----CTGAGGAGCCCTTTGAGCC-----                                                               | mirL    | 20  | 2     |
| -----CTGAGGAGCCCTTTGAGCCT-----                                                              | mirL    | 19  | 1     |
| -----TTCCCTGAGGAGCCCTTT-----                                                                | mirL    | 24  | 1     |
| -----TTCCCTGAGGAGCCCTTTGAGCCT-----                                                          | mirL    | 18  | 1     |
| -----TTCCCTGAGGAGCCCTTT-----                                                                | mirL    | 24  | 1     |
| -----CTGAGGAGCCCTTTGAGCCTGGAG-----                                                          | mirL    | 23  | 1     |
| -----TTCCCTGAGGAGCCCTTTGAGCC-----                                                           | loop    | 18  | 2     |
| -----CTGGAGTGAAAAAACA-----                                                                  | loop    | 18  | 2     |
| -----TGGAGTGAAAAAACA-----                                                                   | loop    | 18  | 1     |
| -----GTGAAAAAACAAGG-----                                                                    | loop    | 18  | 1     |
| -----AGTAAAAAACAAG-----                                                                     | loop    | 19  | 1     |
| -----TGGAGTGAAAAAACA-----                                                                   | loop    | 19  | 1     |
| -----GGAGTGAAAAAACA-----                                                                    | loop    | 19  | 1     |

```

-----GGTCAAGAGGCGCCTGGGAAC----- mirR 21 23
-----GGTCAAGAGGCGCCTGGGAACT----- mirR 22 12
-----GGTCAAGAGGCGCCTGGGAACTG----- mirR 23 6
-----GTCAAGAGGCGCCTGGGAAC----- mirR 20 4
-----CAAGAGGCGCCTGGGAAC----- mirR 18 2
-----AGGTCAAGAGGCGCCTGG----- mirR 18 1
-----GGTCAAGAGGCGCCTGGGAA----- mirR 20 1
-----GTCAAGAGGCGCCTGGGAACTGG----- mirR 23 1
-----GGTCAAGAGGCGCCTGGGAACTGG----- mirR 24 1
-----GTCAAGAGGCGCCTGGGAACT----- mirR 21 1
-----TCAAGAGGCGCCTGGGAAC----- mirR 19 1
-----GGAGAAGAGTGTTAAACTT morR 19 1

```

>mmu-mir-1927

| TCAGATCCCTAGAAACCAGAGTTGCAAGTGGCTGTGAACTGACCTCTGGATGTTAGGGACTGAACATGCATCCTCTCTCTA | species | len | reads |
|-----------------------------------------------------------------------------------|---------|-----|-------|
| ---GATCCCTAGAAACCAGAGTTGC-----                                                    | mirL    | 22  | 22    |
| ---GATCCCTAGAAACCAGAGTTG-----                                                     | mirL    | 21  | 4     |
| ---GATCCCTAGAAACCAGAGT-----                                                       | mirL    | 19  | 3     |
| ---ATCCCTAGAAACCAGAGTT-----                                                       | mirL    | 19  | 3     |
| --AGATCCCTAGAAACCAGA-----                                                         | mirL    | 18  | 2     |
| ---GATCCCTAGAAACCAGAGTTGCAA-----                                                  | mirL    | 24  | 2     |
| ---TCCCTAGAAACCAGAGTTGC-----                                                      | mirL    | 20  | 1     |
| ---GATCCCTAGAAACCAGAG-----                                                        | mirL    | 18  | 1     |
| ---CCCTAGAAACCAGAGTTG-----                                                        | mirL    | 18  | 1     |
| TCAGATCCCTAGAAACCA-----                                                           | mirL    | 18  | 1     |
| ---GATCCCTAGAAACCAGAGTT-----                                                      | mirL    | 20  | 1     |
| TCAGATCCCTAGAAACCAG-----                                                          | mirL    | 19  | 1     |
| ---TCCCTAGAAACCAGAGTTGCA-----                                                     | mirL    | 21  | 1     |
| -----GACCTCTGGATGTTAGGGACTGA-----                                                 | mirR    | 23  | 6544  |
| -----GACCTCTGGATGTTAGGGACTG-----                                                  | mirR    | 22  | 1189  |
| -----GACCTCTGGATGTTAGGGACTGAA-----                                                | mirR    | 24  | 301   |
| -----GACCTCTGGATGTTAGGGACT-----                                                   | mirR    | 21  | 241   |
| -----ACCTCTGGATGTTAGGGACTGA-----                                                  | mirR    | 22  | 138   |
| -----GACCTCTGGATGTTAGGGAC-----                                                    | mirR    | 20  | 77    |
| -----GACCTCTGGATGTTAGGGACTGAAC-----                                               | mirR    | 25  | 46    |
| -----GACCTCTGGATGTTAGGGA-----                                                     | mirR    | 19  | 44    |
| -----TGACCTCTGGATGTTAGGGACTGA-----                                                | mirR    | 24  | 34    |
| -----ACCTCTGGATGTTAGGGACTG-----                                                   | mirR    | 21  | 30    |
| -----CTCTGGATGTTAGGGACTGA-----                                                    | mirR    | 20  | 29    |
| -----CCTCTGGATGTTAGGGACTGA-----                                                   | mirR    | 21  | 24    |
| -----TGACCTCTGGATGTTAGGGACTG-----                                                 | mirR    | 23  | 8     |
| -----ACCTCTGGATGTTAGGGACT-----                                                    | mirR    | 20  | 7     |
| -----CCTCTGGATGTTAGGGACTG-----                                                    | mirR    | 20  | 7     |
| -----CTCTGGATGTTAGGGACTG-----                                                     | mirR    | 19  | 6     |
| -----CCTCTGGATGTTAGGGACT-----                                                     | mirR    | 19  | 5     |
| -----CCTCTGGATGTTAGGGAC-----                                                      | mirR    | 18  | 3     |



```

-----ACTTTGCTGCTCCTCCTG----- mirR 18 1
-----CTGACTCCAGGGAGAGT----- morR 18 2
-----ACTCCAGGGAGAGTTCTGT morR 20 2
-----TGACTCCAGGGAGAGTTC--- morR 19 2
-----TGACTCCAGGGAGAGTTCTG- morR 21 1
-----CCTGACTCCAGGGAGAG----- morR 18 1
-----GACTCCAGGGAGAGTTC--- morR 18 1

```

>mmu-mir-721

| Species | len | reads |
|---------|-----|-------|
| morL    | 19  | 1     |
| morL    | 18  | 1     |
| morL    | 22  | 1     |
| mirL    | 21  | 1041  |
| mirL    | 20  | 259   |
| mirL    | 22  | 108   |
| mirL    | 19  | 47    |
| mirL    | 19  | 15    |
| mirL    | 20  | 14    |
| mirL    | 24  | 11    |
| mirL    | 23  | 10    |
| mirL    | 18  | 10    |
| mirL    | 18  | 8     |
| mirL    | 18  | 5     |
| mirL    | 18  | 3     |
| mirL    | 19  | 3     |
| mirL    | 21  | 1     |
| mirL    | 28  | 1     |
| mirL    | 22  | 1     |
| loop    | 18  | 1     |
| loop    | 19  | 1     |
| mirR    | 18  | 3341  |
| mirR    | 19  | 1286  |
| mirR    | 18  | 1142  |
| mirR    | 20  | 603   |
| mirR    | 21  | 266   |
| mirR    | 20  | 221   |
| mirR    | 19  | 154   |
| mirR    | 21  | 33    |
| mirR    | 22  | 30    |
| mirR    | 18  | 9     |
| mirR    | 22  | 4     |
| mirR    | 19  | 2     |
| mirR    | 20  | 2     |
| mirR    | 18  | 1     |
| mirR    | 21  | 1     |

```

-----AGAATTTTCATTTTTCTGTATT----- mirR 23 1
-----ATTGCCACTCCTGCTTGG morR 18 4
-----GTTATTGCCACTCCTGCT--- morR 18 1

>mmu-mir-148a
AGTTTGGTCTTTTGAGACAAAGTTCTGAGACACTCCGACTCTGAGTATGATAGAAGTCAGTGCACCTACAGAACTTTGTCTCTAGAGGCTGTGGTCGC species len reads
AGTTTGGTCTTTTGAGAC----- morL 18 2
-----AAAGTTCTGAGACACTCCGACT----- mirL 22 647
-----AAAGTTCTGAGACACTCCGACTC----- mirL 23 383
-----AAAGTTCTGAGACACTCC----- mirL 18 194
-----AAAGTTCTGAGACACTCCGA----- mirL 20 186
-----AAAGTTCTGAGACACTCCG----- mirL 19 181
-----AAAGTTCTGAGACACTCCGAC----- mirL 21 160
-----GTTCTGAGACACTCCGACT----- mirL 19 92
-----GTTCTGAGACACTCCGACTC----- mirL 20 62
-----GTTCTGAGACACTCCGACTCT----- mirL 21 55
-----AAGTTCTGAGACACTCCGACT----- mirL 21 38
-----GTTCTGAGACACTCCGAC----- mirL 18 34
-----AGTTCTGAGACACTCCGACTC----- mirL 21 24
-----AGTTCTGAGACACTCCGAC----- mirL 19 22
-----AGTTCTGAGACACTCCGACT----- mirL 20 17
-----AGTTCTGAGACACTCCGA----- mirL 18 16
-----GTTCTGAGACACTCCGACTCTG----- mirL 22 16
-----AAAGTTCTGAGACACTCCGACTCT----- mirL 24 14
-----AAGTTCTGAGACACTCCGACTC----- mirL 22 12
-----AAGTTCTGAGACACTCCGA----- mirL 19 10
-----AGTTCTGAGACACTCCGACTCT----- mirL 22 9
-----AAGTTCTGAGACACTCCGAC----- mirL 20 8
-----AAGTTCTGAGACACTCCG----- mirL 18 4
-----GTTCTGAGACACTCCGACTCTGA----- mirL 23 2
-----CAAAGTTCTGAGACACTCCGA----- mirL 21 2
-----GACAAAGTTCTGAGACAC----- mirL 18 2
-----CAAAGTTCTGAGACACTCCGAC----- mirL 22 2
-----CAAAGTTCTGAGACACTC----- mirL 18 2
-----ACAAAGTTCTGAGACACT----- mirL 18 1
-----CAAAGTTCTGAGACACTCCG----- mirL 20 1
-----CAAAGTTCTGAGACACTCCGACTC----- mirL 24 1
-----TCAGTGCACCTACAGAACTTTG----- mirR 21 1698
-----TCAGTGCACCTACAGAACTTTGT----- mirR 22 1553
-----TCAGTGCACCTACAGAACTTTGTC----- mirR 23 1473
-----TCAGTGCACCTACAGAACTTT----- mirR 20 600
-----TCAGTGCACCTACAGAACTT----- mirR 19 319
-----TCAGTGCACCTACAGAACTTTGTCT----- mirR 24 172
-----TCAGTGCACCTACAGAACT----- mirR 18 169
-----CAGTGCACCTACAGAACTTTG----- mirR 20 105
-----CAGTGCACCTACAGAACTTTGT----- mirR 21 81

```



```

-----CAGTGCACTACAGAACTTT----- mirR 19 36
-----AGTGCACTACAGAACTTTG----- mirR 19 31
-----CAGTGCACTACAGAACTTTGTC----- mirR 22 30
-----GTGCACTACAGAACTTTGT----- mirR 19 29
-----CAGTGCACTACAGAACTT----- mirR 18 23
-----GTGCACTACAGAACTTTG----- mirR 18 22
-----AGTGCACTACAGAACTTT----- mirR 18 9
-----CAGTGCACTACAGAACTTTGTCT----- mirR 23 8
-----AGTCAGTGCACTACAGAAC----- mirR 19 5
-----AGTGCACTACAGAACTTTGT----- mirR 20 5
-----GTCAGTGCACTACAGAACTTT----- mirR 21 3
-----CAGTGCACTACAGAACTTTGTCTC----- mirR 24 2
-----AGTGCACTACAGAACTTTGTC----- mirR 21 2
-----AAGTCAGTGCACTACAGAAC----- mirR 20 2
-----AGTCAGTGCACTACAGAACTTTG----- mirR 23 2
-----GTGCACTACAGAACTTTGTC----- mirR 20 1
-----GTCAGTGCACTACAGAAC----- mirR 18 1
-----AAGTCAGTGCACTACAGAA----- mirR 19 1
-----GTCAGTGCACTACAGAACT----- mirR 19 1
-----CTCTAGAGGCTGTGGTCGC morR 19 2

```

>mmu-mir-489

```

ATATGTGTGATGACACTTTCTAAAGTCTTCCAGAATGACACCACATATATGGCAGCTAAAC species len reads
--ATGTGTGATGACACTTTCT----- mirL 18 4
----TGTGATGACACTTTCTAA----- mirL 18 2
--TGTGTGATGACACTTTCT----- mirL 18 2
--ATGTGTGATGACACTTTCT----- mirL 19 1
--ATGTGTGATGACACTTTCTA----- mirL 20 1
----GTGTGATGACACTTTCTAA----- mirL 19 1
ATATGTGTGATGACACTTTCT----- mirL 20 1
-----AATGACACCACATATATGGCAGC----- mirR 23 4010
-----AATGACACCACATATATGGCAG----- mirR 22 2165
-----AATGACACCACATATATGGCAGCT---- mirR 24 915
-----AATGACACCACATATATGGCA----- mirR 21 567
-----AATGACACCACATATATGGCAGCTA--- mirR 25 139
-----ATGACACCACATATATGGCAGC----- mirR 22 110
-----ATGACACCACATATATGGCAG----- mirR 21 99
-----AATGACACCACATATATGGC----- mirR 20 87
-----GACACCACATATATGGCAGC----- mirR 20 76
-----GACACCACATATATGGCAG----- mirR 19 64
-----TGACACCACATATATGGCAGC----- mirR 21 53
-----AATGACACCACATATATGGCAGCTAAAC mirR 28 45
-----TGACACCACATATATGGCAG----- mirR 20 44
-----ATGACACCACATATATGGCAGCT---- mirR 23 22
-----ATGACACCACATATATGGCA----- mirR 20 17
-----GACACCACATATATGGCA----- mirR 18 16

```

```

-----TGACACCACATATATGGCA----- mirR 19 13
-----GACACCACATATATGGCAGCT---- mirR 21 13
-----TGACACCACATATATGGCAGCTA--- mirR 23 8
-----TGACACCACATATATGGCAGCT---- mirR 22 7
-----GAATGACACCACATATATGGCAG-- mirR 23 4
-----ATGACACCACATATATGGCAGCTA--- mirR 24 3
-----ATGACACCACATATATGG----- mirR 18 3
-----ATGACACCACATATATGGC----- mirR 19 3
-----GAATGACACCACATATATGGCAGC--- mirR 24 3
-----GACACCACATATATGGCAGCTA--- mirR 22 3
-----GAATGACACCACATATAT----- mirR 18 2
-----TGACACCACATATATGGC----- mirR 18 1
-----GAATGACACCACATATATGGCAGCT--- mirR 25 1
-----GAATGACACCACATATATGGCA----- mirR 22 1
-----CAGAATGACACCACATATATGGCA----- mirR 24 1

```

>mmu-mir-299

| Species                                                                                      | len | reads |
|----------------------------------------------------------------------------------------------|-----|-------|
| CACGCGGTACTTGAAGAAATGGTTTACCGTCCCACATACATTTGAGTATGTATGTGGGACGGTAAACCGCTTCTTGGTATCCAGCCCAGCCA | 19  | 1     |
| CACGCGGTACTTGAAGAAA-----                                                                     | 19  | 1     |
| -----TGGTTTACCGTCCCACATACAT-----                                                             | 22  | 2648  |
| -----TGGTTTACCGTCCCACATAC-----                                                               | 20  | 1548  |
| -----TGGTTTACCGTCCCACATACA-----                                                              | 21  | 676   |
| -----TGGTTTACCGTCCCACAT-----                                                                 | 18  | 313   |
| -----ATGGTTTACCGTCCCACATAC-----                                                              | 21  | 290   |
| -----TGGTTTACCGTCCCACATA-----                                                                | 19  | 258   |
| -----TGGTTTACCGTCCCACATACATT-----                                                            | 23  | 204   |
| -----ATGGTTTACCGTCCCACATACA-----                                                             | 22  | 114   |
| -----GGTTTACCGTCCCACATACAT-----                                                              | 21  | 103   |
| -----ATGGTTTACCGTCCCACATA-----                                                               | 20  | 46    |
| -----GGTTTACCGTCCCACATAC-----                                                                | 19  | 43    |
| -----ATGGTTTACCGTCCCACAT-----                                                                | 19  | 43    |
| -----TGGTTTACCGTCCCACATACATT-----                                                            | 24  | 31    |
| -----GGTTTACCGTCCCACATACA-----                                                               | 20  | 30    |
| -----ATGGTTTACCGTCCCACATACAT-----                                                            | 23  | 13    |
| -----ATGGTTTACCGTCCCACA-----                                                                 | 18  | 12    |
| -----AATGGTTTACCGTCCCACATAC-----                                                             | 22  | 8     |
| -----GGTTTACCGTCCCACATA-----                                                                 | 18  | 7     |
| -----TTTACCGTCCCACATACAT-----                                                                | 19  | 5     |
| -----GTTTACCGTCCCACATACAT-----                                                               | 20  | 5     |
| -----GGTTTACCGTCCCACATACATT-----                                                             | 22  | 4     |
| -----GTTTACCGTCCCACATACA-----                                                                | 19  | 2     |
| -----GGTTTACCGTCCCACATACATT-----                                                             | 23  | 2     |
| -----TTTACCGTCCCACATACA-----                                                                 | 18  | 2     |
| -----AATGGTTTACCGTCCCACAT-----                                                               | 20  | 1     |
| -----ATGGTTTACCGTCCCACATACATT-----                                                           | 24  | 1     |
| -----GTTTACCGTCCCACATAC-----                                                                 | 18  | 1     |

```

-----AATGGTTTACCGTCCCACATACAT----- mirL 24 1
-----AATGGTTTACCGTCCCACATA----- mirL 21 1
-----AATGGTTTACCGTCCCACATACA----- mirL 23 1
-----AATGGTTTACCGTCCCACA----- mirL 19 1
-----TTTACCGTCCCACATACATT----- mirL 21 1
-----TATGTGGGACGGTAAACCGCT----- mirR 22 807
-----TATGTGGGACGGTAAACCGCT----- mirR 21 325
-----TATGTGGGACGGTAAACCGCTTC----- mirR 23 213
-----ATGTGGGACGGTAAACCGCT----- mirR 21 87
-----GTATGTGGGACGGTAAACCGC----- mirR 21 78
-----GTATGTGGGACGGTAAACCGCT----- mirR 22 70
-----TATGTGGGACGGTAAACC----- mirR 18 53
-----TATGTGGGACGGTAAACCG----- mirR 19 52
-----TATGTGGGACGGTAAACCGC----- mirR 20 49
-----TATGTGGGACGGTAAACCGCTTCT----- mirR 24 46
-----GTATGTGGGACGGTAAAC----- mirR 18 26
-----ATGTGGGACGGTAAACCGCT----- mirR 20 24
-----ATGTGGGACGGTAAACCGCTTC----- mirR 22 16
-----GTGGGACGGTAAACCGCT----- mirR 19 16
-----GTATGTGGGACGGTAAACCG----- mirR 20 16
-----TGTGGGACGGTAAACCGCT----- mirR 20 15
-----GTATGTGGGACGGTAAACCGCT----- mirR 23 13
-----GTATGTGGGACGGTAAACC----- mirR 19 11
-----ATGTGGGACGGTAAACCGC----- mirR 19 8
-----GTGGGACGGTAAACCGCT----- mirR 18 7
-----ATGTGGGACGGTAAACCGCTTCT----- mirR 23 6
-----ATGTGGGACGGTAAACCG----- mirR 18 4
-----TGTGGGACGGTAAACCGCT----- mirR 19 3
-----GTATGTGGGACGGTAAACCGCTTC----- mirR 24 3
-----TGTGGGACGGTAAACCGCTTCTTG----- mirR 24 2
-----GTGGGACGGTAAACCGCTTC----- mirR 20 2
-----TGTATGTGGGACGGTAAACCGCT----- mirR 23 1
-----TGTGGGACGGTAAACCGCTTC----- mirR 21 1
-----TTCTTGGTATCCAGCCCAG----- morR 19 4
-----TGGTATCCAGCCCAGCCA morR 18 1
-----CTTGGTATCCAGCCCAGCC- morR 19 1
-----TCTTGGTATCCAGCCCAGCCA morR 21 1

>mmu-mir-152
GTCGCCGCTGTTCCCCGGGCTAGGTTCTGTGATACACTCCGACTCGGGCTCTGGAGCAGTCAGTGCATGACAGAACTTGGGCCCGGTAGGACCTTCTGCA species len reads
GTCGCCGCTGTTCCCCGGGCT----- morL 22 1
--CGCCGCTGTTCCCCGGGCT----- morL 20 1
-----TAGGTTCTGTGATACACTCCGAC----- mirL 23 69
-----TAGGTTCTGTGATACACTCCGACT----- mirL 24 50
-----TAGGTTCTGTGATACACTCCGACTC----- mirL 25 43
-----AGGTTCTGTGATACACTCCGACT----- mirL 24 33

```

```

-----TAGGTTCTGTGATACACTCCGA----- mirL 22 31
-----AGGTTCCTGTGATACACTCCGACT----- mirL 23 28
-----TAGGTTCTGTGATACACTC----- mirL 19 23
-----AGGTTCCTGTGATACACTCCGAC----- mirL 22 22
-----TAGGTTCTGTGATACACTCC----- mirL 20 13
-----AGGTTCCTGTGATACACTCCGA----- mirL 21 10
-----TAGGTTCTGTGATACACTCCG----- mirL 21 6
-----AGGTTCCTGTGATACACTCCGACTCG----- mirL 25 5
-----AGGTTCCTGTGATACACTCC----- mirL 19 4
-----AGGTTCCTGTGATACACTCCG----- mirL 20 3
-----CTCGGGCTCTGGAGCAGTC----- loop 19 1
-----TCGGGCTCTGGAGCAGTC----- loop 18 1
-----TCAGTGCATGACAGAACTTGG----- mirR 21 3218
-----TCAGTGCATGACAGAACTTGGG----- mirR 22 2211
-----TCAGTGCATGACAGAACTTGGGC----- mirR 23 743
-----TCAGTGCATGACAGAACTT----- mirR 19 457
-----TCAGTGCATGACAGAACTTG----- mirR 20 448
-----TCAGTGCATGACAGAACTTGGGCC----- mirR 24 243
-----TCAGTGCATGACAGAACT----- mirR 18 142
-----CAGTGCATGACAGAACTTGG----- mirR 20 128
-----AGTGCATGACAGAACTTGG----- mirR 19 95
-----GTGCATGACAGAACTTGG----- mirR 18 72
-----CAGTGCATGACAGAACTTGGG----- mirR 21 39
-----AGTGCATGACAGAACTTG----- mirR 18 37
-----AGTGCATGACAGAACTTGGG----- mirR 20 29
-----CAGTGCATGACAGAACTT----- mirR 18 25
-----GTGCATGACAGAACTTGGG----- mirR 19 22
-----CAGTGCATGACAGAACTTG----- mirR 19 21
-----GTCAGTGCATGACAGAACTTGG----- mirR 22 16
-----CAGTGCATGACAGAACTTGGGC----- mirR 22 15
-----AGTGCATGACAGAACTTGGGC----- mirR 21 10
-----GTGCATGACAGAACTTGGGC----- mirR 20 6
-----CAGTGCATGACAGAACTTGGGCC----- mirR 23 5
-----AGTGCATGACAGAACTTGGGCC----- mirR 22 3
-----GTCAGTGCATGACAGAACTTGGG----- mirR 23 3
-----GTCAGTGCATGACAGAACT----- mirR 19 2
-----GTCAGTGCATGACAGAACTTG----- mirR 21 2
-----CAGTGCATGACAGAACTTGGGCC----- mirR 24 1
-----GCCCCGTAGGACCTTCTG----- morR 18 15
-----CCCCGTAGGACCTTCTGCA morR 19 1

```

>mmu-mir-3072

```

GGTGGCAGGGCTGTTGAGTGCAGGGACCCCGAGGGAGGGCAGGCTGCCCGAGGCCCTGCCCTCCAGGAAGCCTTCTTGCTCCAGCCCAACACACAAT species len reads
GGTGGCAGGGCTGTTGAGTGCAG----- morL 23 1
-----AGGGACCCCGAGGGAGGGCAG----- mirL 22 5
-----AGGGACCCCGAGGGAGGGCAG----- mirL 21 4

```

```

-----AGGGACCCCGAGGGAGGGCAGGC----- mirL 23 4
-----AGGGACCCCGAGGGAGGGC----- mirL 19 3
-----AGGGACCCCGAGGGAGGGCA----- mirL 20 3
-----GACCCCGAGGGAGGGCAG----- mirL 18 1
-----GGACCCCGAGGGAGGGCA----- mirL 18 1
-----AGGGACCCCGAGGGAGGGCAGGCTG----- mirL 25 1
-----GGACCCCGAGGGAGGGCAGG----- mirL 20 1
-----CGAGGACCCCGAGGGAG----- mirL 18 1
-----GACCCCGAGGGAGGGCAGG----- mirL 19 1
-----AGGCTGCCCCAGGCCCTG----- loop 18 2
-----TGCCCCCTCCAGGAAGCCTTCT----- mirR 22 5789
-----TGCCCCCTCCAGGAAGCCTTC----- mirR 21 1118
-----TGCCCCCTCCAGGAAGCCTT----- mirR 20 430
-----TGCCCCCTCCAGGAAGCC----- mirR 18 399
-----TGCCCCCTCCAGGAAGCCTTCTT----- mirR 23 323
-----TGCCCCCTCCAGGAAGCCT----- mirR 19 99
-----GCCCCCTCCAGGAAGCCTTCT----- mirR 21 66
-----TGCCCCCTCCAGGAAGCCTTCTTG----- mirR 24 36
-----GCCCCCTCCAGGAAGCCTTC----- mirR 20 16
-----GCCCCCTCCAGGAAGCCTT----- mirR 19 4
-----CCCCCTCCAGGAAGCCTTCT----- mirR 20 3
-----GCCCCCTCCAGGAAGCCTTCTT----- mirR 22 2
-----CCCCTCCAGGAAGCCTTC----- mirR 18 1
-----GCCCCCTCCAGGAAGCCTTCTTGC----- mirR 24 1
-----CTGCCCTCCAGGAAGCCTTC----- mirR 22 1
-----CCCCCTCCAGGAAGCCTTC----- mirR 19 1
-----CCCCCTCCAGGAAGCCTT----- mirR 18 1
-----TCCAGCCCAACACACAAT morR 18 3
-----TGCTCCAGCCCAACACAC--- morR 18 2
-----GCTCCAGCCCAACACACA-- morR 18 1
-----TCTTGCTCCAGCCCAACA----- morR 18 1

>mmu-mir-375
CGGGTCTTCCGCTCCGGCCCCGCGACGAGCCCTCGCACAAACCGGACCTGAGCGTTTTGTTCGTTTCGGCTCGCGTGAGGCAGGGCGGCTTCTCAGCATCAGCCTTGGGGCC species len reads
---GTCTTCCGCTCCGGCCCC----- morL 18 6
---GTCTTCCGCTCCGGCCCCG----- morL 19 2
CGGGTCTTCCGCTCCGGCCCC----- morL 21 2
---TCTTCCGCTCCGGCCCCG----- morL 18 1
---GGTCTTCCGCTCCGGCCCC----- morL 19 1
-----GCGACGAGCCCTCGCACAAACC----- mirL 23 4
-----GCGACGAGCCCTCGCAC----- mirL 18 1
-----GCGACGAGCCCTCGCACAAA----- mirL 21 1
-----CCGCGACGAGCCCTCGC----- mirL 18 1
-----TTTGTTCGTTTCGGCTCGCGTGA----- mirR 22 4877
-----TTTGTTCGTTTCGGCTCGCGTG----- mirR 21 975
-----TTTGTTCGTTTCGGCTCGCGTGAG----- mirR 23 921

```

```

-----TTGTTTCGTTTCGGCTCGCGTGA----- mirR 21 453
-----TTTGTTCGTTTCGGCTCGCGT----- mirR 20 251
-----TTTGTTCGTTTCGGCTCGC----- mirR 18 168
-----TTGTTTCGTTTCGGCTCGCGTGA----- mirR 22 130
-----TTTGTTCGTTTCGGCTCGCGTGAGG----- mirR 24 101
-----TTTGTTCGTTTCGGCTCGCG----- mirR 19 81
-----TTTTGTTCGTTTCGGCTCGCGTGA----- mirR 23 68
-----TTGTTTCGTTTCGGCTCGCGTG----- mirR 20 57
-----TTGTTTCGTTTCGGCTCGCGT----- mirR 19 36
-----TGTTTCGTTTCGGCTCGCGTGA----- mirR 20 25
-----TTGTTTCGTTTCGGCTCGCGTGAGG----- mirR 23 22
-----TTTTGTTCGTTTCGGCTCGCGTG----- mirR 22 16
-----TTTTGTTCGTTTCGGCTCGCGT----- mirR 21 11
-----TTGTTTCGTTTCGGCTCGCG----- mirR 18 8
-----GTTTCGTTTCGGCTCGCGTGA----- mirR 19 7
-----TGTTTCGTTTCGGCTCGCGT----- mirR 18 7
-----TTTTGTTCGTTTCGGCTCG----- mirR 18 6
-----GTTTCGTTTCGGCTCGCGTG----- mirR 18 6
-----TGTTTCGTTTCGGCTCGCGTGAG----- mirR 21 6
-----TGTTTCGTTTCGGCTCGCGTG----- mirR 19 6
-----TTTTGTTCGTTTCGGCTCGCGTGAG----- mirR 24 6
-----TTTTGTTCGTTTCGGCTCGC----- mirR 19 5
-----TTGTTTCGTTTCGGCTCGCGTGAGGC----- mirR 24 4
-----TGTTTCGTTTCGGCTCGCGTGAGGC----- mirR 23 3
-----TTTTGTTCGTTTCGGCTCGCGTGAGG----- mirR 25 3
-----TGTTTCGTTTCGGCTCGCGTGAGGCA----- mirR 24 2
-----GGCAGGGGCGGCTTCTCAG----- morR 19 1
-----GGCAGGGGCGGCTTCTCAGCATCAGCCTTGGGGCC morR 35 1

```

>mmu-mir-503

```

TCAGCCCATCCCCTCAGTCGTGCCCTAGCAGCGGGAACAGTACTGCAGTGAGTGTGGTGGCCCTGGAGTATTGTTTCCACTGCCTGGGTAAGTCTGGGTCTTCCACATGGGCACACCCAC species len read
-----ATCCCCTCAGTCGTGCC----- morL 18 202
-----ATCCCCTCAGTCGTGCC----- morL 19 28
-----ATCCCCTCAGTCGTGCCCT----- morL 20 7
-----CATCCCCTCAGTCGTGCCCT----- morL 21 4
-----CCATCCCCTCAGTCGTGCC----- morL 21 3
-----TCCCCTCAGTCGTGCC----- morL 18 3
-----TCCCCTCAGTCGTGCCCT----- morL 19 3
-----CATCCCCTCAGTCGTGCC----- morL 20 3
-----CCTCAGTCGTGCCCTA----- morL 18 1
TCAGCCCATCCCCTCAGTCGTGCC----- morL 26 1
-----CCCCTCAGTCGTGCCCT----- morL 18 1
-CAGCCCATCCCCTCAGTCGTGCC----- morL 25 1
-----TAGCAGCGGGAACAGTACTGC----- mirL 21 2197
-----TAGCAGCGGGAACAGTACTG----- mirL 20 1825
-----TAGCAGCGGGAACAGTACTGCAG----- mirL 23 1124

```

```

-----TAGCAGCGGGAACAGTACTGCA----- mirL 22 466
-----TAGCAGCGGGAACAGTACT----- mirL 19 282
-----TAGCAGCGGGAACAGTACTGCAGT----- mirL 24 224
-----TAGCAGCGGGAACAGTACTAC----- mirL 18 172
-----AGCAGCGGGAACAGTACTGC----- mirL 20 130
-----AGCAGCGGGAACAGTACTG----- mirL 19 104
-----AGCAGCGGGAACAGTACTGCAG----- mirL 22 93
-----GCAGCGGGAACAGTACTG----- mirL 18 38
-----AGCAGCGGGAACAGTACTGCAGT----- mirL 23 27
-----GCAGCGGGAACAGTACTGC----- mirL 19 26
-----CAGCGGGAACAGTACTGC----- mirL 18 26
-----AGCAGCGGGAACAGTACTGCA----- mirL 21 25
-----AGCAGCGGGAACAGTACT----- mirL 18 23
-----CAGCGGGAACAGTACTGCAG----- mirL 20 16
-----GCAGCGGGAACAGTACTGCAG----- mirL 21 8
-----CAGCGGGAACAGTACTGCA----- mirL 19 5
-----AGCAGCGGGAACAGTACTGCAGTG----- mirL 24 3
-----GCAGCGGGAACAGTACTGCA----- mirL 20 2
-----CTAGCAGCGGGAACAGTACTG----- mirL 21 2
-----CCTAGCAGCGGGAACAGTACTGC----- mirL 23 1
-----CTAGCAGCGGGAACAGTACTGC----- mirL 22 1
-----GCAGCGGGAACAGTACTGCAGT----- mirL 22 1
-----CAGCGGGAACAGTACTGCAGT----- mirL 21 1
-----CAGCGGGAACAGTACTGCAGTG----- mirL 22 1
-----CTAGCAGCGGGAACAGTACTGCAG----- mirL 24 1
-----CAGTGAGTGTGTTGGTGCC----- loop 18 2
-----GAGTGTTGGTGCCCTGG----- loop 18 1
-----GTGAGTGTGTTGGTGCCCTG----- loop 19 1
-----GAGTATTGTTTCCACTGCCTGG----- mirR 22 368
-----GAGTATTGTTTCCACTGCCT----- mirR 20 365
-----GGAGTATTGTTTCCACTGCCTGG----- mirR 23 77
-----GAGTATTGTTTCCACTGC----- mirR 18 67
-----GAGTATTGTTTCCACTGCCTG----- mirR 21 64
-----GAGTATTGTTTCCACTGCC----- mirR 19 63
-----GGAGTATTGTTTCCACTGCCTG----- mirR 22 39
-----GAGTATTGTTTCCACTGCCTGGG----- mirR 23 26
-----GGAGTATTGTTTCCACTGCCT----- mirR 21 20
-----AGTATTGTTTCCACTGCCTG----- mirR 20 18
-----GTATTGTTTCCACTGCCT----- mirR 18 12
-----AGTATTGTTTCCACTGCCT----- mirR 19 10
-----TATTGTTTCCACTGCCTG----- mirR 18 10
-----GGAGTATTGTTTCCACTGC----- mirR 19 10
-----GGAGTATTGTTTCCACTGCCTGGG----- mirR 24 7
-----GAGTATTGTTTCCACTGCCTGGGT----- mirR 24 4
-----AGTATTGTTTCCACTGCCTGG----- mirR 21 4
-----GGAGTATTGTTTCCACTG----- mirR 18 4

```

```

-----GTATTGTTTCCACTGCCTGG----- mirR 20 4
-----TATTGTTTCCACTGCCTGG----- mirR 19 3
-----GGAGTATTGTTTCCACTGCC----- mirR 20 2
-----AGTATTGTTTCCACTGCC----- mirR 18 2
-----GTATTGTTTCCACTGCCTG----- mirR 19 2
-----TGGAGTATTGTTTCCACTGCCTGG----- mirR 24 1
-----TGGAGTATTGTTTCCACT----- mirR 18 1
-----GTAAGTCTGGGTCTTCCACATGGGCACACCCAC morR 33 1

```

>mmu-mir-1274a

```

TTCTGCCATTCTTCAGGTCCTGTTTCAGGCGCCAAACTGTTGCTGGCCGTCAGCGGCACGCAAGGAACAGGTACAGCTGAGATGGCAGGCTCAAGCTAAAAGAAAAGGAACTAGAGGGACGGAAGAAAGAACGGA spec
TTCTGCCATTCTTCAGGT----- morL
-----GTCCTGTTTCAGGCGCCA----- mirL
-----GTCCTGTTTCAGGCGCAA----- mirL
-----TCCCTGTTTCAGGCGCCAAA----- mirL
-----TCCCTGTTTCAGGCGCAA----- mirL
-----GTCCTGTTTCAGGCGCCAAA----- mirL
-----CAGGTCCTGTTTCAGGCGCCA----- mirL
-----CAGGTCCTGTTTCAGGCGCAA----- mirL
-----GTCCTGTTTCAGGCGCCAAA----- mirL
-----TCCCTGTTTCAGGCGCCAAA----- mirL
-----AGGTCCTGTTTCAGGCGCCA----- mirL
-----GGTCCCTGTTTCAGGCGCCA----- mirL
-----AGGTCCTGTTTCAGGCGCCAA----- mirL
-----AGGTCCTGTTTCAGGCGCC----- mirL
-----CAGGTCCTGTTTCAGGCGCC----- mirL
-----GGTCCCTGTTTCAGGCGCCAA----- mirL
-----AGGTCCTGTTTCAGGCGC----- mirL
-----CCCTGTTTCAGGCGCCAAA----- mirL
-----CAGGTCCTGTTTCAGGCGCCAAA----- mirL
-----CAGGTCCTGTTTCAGGCGC----- mirL
-----CAGGTCCTGTTTCAGGCG----- mirL
-----GTCCTGTTTCAGGCGCCAAACTG----- mirL
-----CCTGTTTCAGGCGCCAAAAC----- mirL
-----GTCCTGTTTCAGGCGCCAAACT----- mirL
-----GGTCCCTGTTTCAGGCGCC----- mirL
-----TCCCTGTTTCAGGCGCCAAACT----- mirL
-----AGGGACGGAAGAAAGAAC----- mirR
-----GGACGGAAGAAAGAACGGA----- mirR
-----GGGACGGAAGAAAGAACGG----- mirR

```

>mmu-mir-196b

```

CAGCATCAGAAGTGGTCGGTGATTTAGGTAGTTTCTGTTGTTGGGATCCACCTTCTCTCGACAGCAGCAGACTGCCTTCATTAC species len reads
CAGCATCAGAAGTGGTCGGTG----- morL 21 2
-----TCAGAAGTGGTCGGTGAT----- morL 18 1
-----GAACTGGTCGGTGATTTAG----- morL 19 1

```



```

-----TAGGTAGTTTCCTGTTGTT----- mirL 19 47
-----TAGGTAGTTTCCTGTTGT----- mirL 18 45
-----TAGGTAGTTTCCTGTTGTTGGG----- mirL 22 31
-----TAGGTAGTTTCCTGTTGTTG----- mirL 20 17
-----TAGGTAGTTTCCTGTTGTTGG----- mirL 21 11
-----AGGTAGTTTCCTGTTGTTG----- mirL 19 8
-----GGTAGTTTCCTGTTGTTG----- mirL 18 8
-----GGTAGTTTCCTGTTGTTGG----- mirL 19 4
-----AGGTAGTTTCCTGTTGTT----- mirL 18 3
-----TAGGTAGTTTCCTGTTGTTGGGATC----- mirL 25 2
-----GTAGTTTCCTGTTGTTGG----- mirL 18 1
-----AGGTAGTTTCCTGTTGTTGGG----- mirL 21 1
-----GGTAGTTTCCTGTTGTTGGG----- mirL 20 1
-----TAGGTAGTTTCCTGTTGTTGGGA----- mirL 23 1
-----GTAGTTTCCTGTTGTTGGG----- mirL 19 1
-----TTAGGTAGTTTCCTGTTGTTG----- mirL 21 1
-----GGGATCCACCTTCTCTC----- loop 18 1
-----TCGACAGCACGACACTGCCTTC----- mirR 22 5037
-----TCGACAGCACGACACTGCCTTCA----- mirR 23 1110
-----TCGACAGCACGACACTGCCTT----- mirR 21 730
-----CGACAGCACGACACTGCCTTC----- mirR 21 255
-----TCGACAGCACGACACTGCCT----- mirR 20 157
-----TCGACAGCACGACACTGCCTTCAT----- mirR 24 55
-----TCGACAGCACGACACTGCC----- mirR 19 51
-----CGACAGCACGACACTGCCTTCA----- mirR 22 51
-----GACAGCACGACACTGCCTTC----- mirR 20 50
-----TCGACAGCACGACACTGC----- mirR 18 34
-----CGACAGCACGACACTGCCTT----- mirR 20 32
-----ACAGCACGACACTGCCTTC----- mirR 19 30
-----CGACAGCACGACACTGCCT----- mirR 19 20
-----CTCGACAGCACGACACTGCCTTC----- mirR 23 11
-----GACAGCACGACACTGCCTTCA----- mirR 21 11
-----ACAGCACGACACTGCCTT----- mirR 18 8
-----GACAGCACGACACTGCCTT----- mirR 19 4
-----CGACAGCACGACACTGCC----- mirR 18 4
-----CGACAGCACGACACTGCCTTCATTAC----- mirR 26 2
-----ACAGCACGACACTGCCTTCA----- mirR 20 2
-----TCTCGACAGCACGACACT----- mirR 18 2
-----GACAGCACGACACTGCCT----- mirR 18 2
-----CTCGACAGCACGACACTG----- mirR 18 1
-----CTCGACAGCACGACACTGCCT----- mirR 21 1
-----CTCTCGACAGCACGACACTGCCTTC----- mirR 25 1
-----CTCGACAGCACGACACTGCC----- mirR 20 1
-----CGACAGCACGACACTGCCTTCAT----- mirR 23 1
-----CTCGACAGCACGACACTGC----- mirR 19 1
-----CTCGACAGCACGACACTGCCTT----- mirR 22 1

```

```

>mmu-mir-802
GCGGTCCTATTATTGCAATCAGTAACAAAGATTTCATCCTTGTGTCAATCATAACAACACGGAGAGTCTTTGTCACTCAGTG species len reads
GCGGTCCTATTATTGCA-----
-----TCAGTAACAAAGATTTCATCCT----- mirL 18 1
-----CAGTAACAAAGATTTCATCCTTG----- mirL 22 2192
-----CAGTAACAAAGATTTCATCCT----- mirL 20 1573
-----CAGTAACAAAGATTTCATCCTTTGT----- mirL 23 750
-----TCAGTAACAAAGATTTCATCC----- mirL 20 741
-----TCAGTAACAAAGATTTCATCCTT----- mirL 20 604
-----CAGTAACAAAGATTTCATCCTT----- mirL 22 441
-----CAGTAACAAAGATTTCATCCTT----- mirL 21 309
-----CAGTAACAAAGATTTCATCC----- mirL 19 202
-----GTAACAAAGATTTCATCCT----- mirL 18 191
-----TCAGTAACAAAGATTTCATCCTTG----- mirL 23 148
-----AGTAACAAAGATTTCATCCT----- mirL 19 138
-----CAGTAACAAAGATTTCATCCTTTGT----- mirL 24 113
-----TCAGTAACAAAGATTTCATC----- mirL 19 106
-----GTAACAAAGATTTCATCCTTTGT----- mirL 21 55
-----TCAGTAACAAAGATTTCATCCTTTGT----- mirL 24 52
-----CAGTAACAAAGATTTCATC----- mirL 18 48
-----AGTAACAAAGATTTCATCCTT----- mirL 20 26
-----AGTAACAAAGATTTCATCCTTTGT----- mirL 22 24
-----TCAGTAACAAAGATTTCAT----- mirL 18 23
-----GTAACAAAGATTTCATCCTT----- mirL 19 21
-----AGTAACAAAGATTTCATCCTTG----- mirL 21 19
-----GTAACAAAGATTTCATCCTTG----- mirL 20 15
-----AGTAACAAAGATTTCATCC----- mirL 18 13
-----ATCAGTAACAAAGATTTCATCCT----- mirL 22 1
-----AATCAGTAACAAAGATTTC----- mirL 18 1
-----GTAACAAAGATTTCATCCTTTGTGTCA----- mirL 25 1
-----GTAACAAAGATTTCATCCTTTGTG----- mirL 22 1
-----AGTAACAAAGATTTCATCCTTTGTG----- mirL 24 1
-----TGTCAATCATAACAACAG----- loop 18 2
-----TGTCAATCATAACAACAGGA----- loop 20 1
-----AGAGTCTTTGTCACTCAGTG----- mirR 20 3
-----CGGAGAGTCTTTGTCACTCAGT----- mirR 22 2
-----CGGAGAGTCTTTGTCACTCAG----- mirR 21 1
-----GAGTCTTTGTCACTCAGTG----- mirR 19 1
-----AGAGTCTTTGTCACTCAGT----- mirR 19 1
-----AGTCTTTGTCACTCAGTG----- mirR 18 1

>mmu-mir-200b
GCCATCTTACTGGGCAGCATTGGATAGTGTCTGATCTCTAATACTGCCTGGTAATGATGACGG species len reads
--CATCTTACTGGGCAGCATTG----- mirL 20 652
--CATCTTACTGGGCAGCATTGG----- mirL 21 371
--CATCTTACTGGGCAGCATTGGA----- mirL 22 201

```

```

--CATCTTACTGGGCAGCATT----- mirL 19 96
--CATCTTACTGGGCAGCAT----- mirL 18 45
-----CTTACTGGGCAGCATTGG----- mirL 18 27
--CATCTTACTGGGCAGCATTGGAT----- mirL 23 27
--ATCTTACTGGGCAGCATTG----- mirL 19 25
--TCTTACTGGGCAGCATTG----- mirL 18 21
--ATCTTACTGGGCAGCATTGG----- mirL 20 20
--TCTTACTGGGCAGCATTGG----- mirL 19 18
--ATCTTACTGGGCAGCATTGGA----- mirL 21 13
--ATCTTACTGGGCAGCAT----- mirL 18 7
--CATCTTACTGGGCAGCATTGGATA----- mirL 24 6
--ATCTTACTGGGCAGCATTGGAT----- mirL 22 6
--ATCTTACTGGGCAGCATTGGATA----- mirL 23 5
-----CTTACTGGGCAGCATTGGA----- mirL 19 5
-----TCTTACTGGGCAGCATTGGA----- mirL 20 4
-----TCTTACTGGGCAGCATTGGAT----- mirL 21 3
--ATCTTACTGGGCAGCATTGGATAG----- mirL 24 2
-----CTTACTGGGCAGCATTGGATA----- mirL 21 1
--CCATCTTACTGGGCAGCA----- mirL 18 1
GCCATCTTACTGGGCAGC----- mirL 18 1
-----GATAGTGTCTGATCTCTA----- loop 18 2
-----TTGGATAGTGTCTGATCTCT----- loop 20 1
-----TAATACTGCCTGGTAATGATGA----- mirR 22 2087
-----TAATACTGCCTGGTAATGATG----- mirR 21 1077
-----TAATACTGCCTGGTAATGATGAC----- mirR 23 715
-----CTCTAATACTGCCTGGTAATGATG----- mirR 24 463
-----AATACTGCCTGGTAATGATGA----- mirR 21 324
-----TAATACTGCCTGGTAATGAT----- mirR 20 214
-----TAATACTGCCTGGTAATGA----- mirR 19 206
-----AATACTGCCTGGTAATGATG----- mirR 20 203
-----CTCTAATACTGCCTGGTAATGA----- mirR 22 191
-----CTCTAATACTGCCTGGTAATGAT----- mirR 23 113
-----CTCTAATACTGCCTGGTAAT----- mirR 20 82
-----TAATACTGCCTGGTAATGATGACG----- mirR 24 59
-----CTCTAATACTGCCTGGTAA----- mirR 19 57
-----AATACTGCCTGGTAATGATGAC----- mirR 22 51
-----CTCTAATACTGCCTGGTAATG----- mirR 21 50
-----TAATACTGCCTGGTAATG----- mirR 18 48
-----AATACTGCCTGGTAATGA----- mirR 18 43
-----ATACTGCCTGGTAATGATG----- mirR 19 41
-----ATACTGCCTGGTAATGATGA----- mirR 20 35
-----CTCTAATACTGCCTGGTA----- mirR 18 33
-----AATACTGCCTGGTAATGAT----- mirR 19 23
-----ATACTGCCTGGTAATGATGAC----- mirR 21 11
-----TACTGCCTGGTAATGATGA----- mirR 19 10
-----ATACTGCCTGGTAATGAT----- mirR 18 9

```

```

-----AATACTGCCTGGTAATGATGACG- mirR 23 8
-----TCTAATACTGCCTGGTAATGATG---- mirR 23 6
-----AATACTGCCTGGTAATGATGACGG mirR 24 5
-----CTAATACTGCCTGGTAATGATG---- mirR 22 5
-----TACTGCCTGGTAATGATG---- mirR 18 4
-----CTAATACTGCCTGGTAATGA----- mirR 20 3
-----CTAATACTGCCTGGTAATGATGAC-- mirR 24 3
-----TCTAATACTGCCTGGTAATGA----- mirR 21 3
-----TACTGCCTGGTAATGATGAC-- mirR 20 2
-----CTAATACTGCCTGGTAATGATGA--- mirR 23 1
-----CTAATACTGCCTGGTAATGAT---- mirR 21 1

```

>mmu-mir-301b

```

TTCCTGCTGGCTGCGGGTGCTGCTGACTAGGTTGCACTACTGTGCTGTGAGAAGCAGTGCAATGGTATTGTCAAAGCATCTGGGACCAGCCTCGAAGACC species len reads
TTCCTGCTGGCTGCGGGTGC----- morL 20 1
--CCTGCTGGCTGCGGGTGC----- morL 18 1
-TCCTGCTGGCTGCGGGTG----- morL 18 1
-----GCTCTGACTAGGTTGCACTAC----- mirL 21 10
-----GCTCTGACTAGGTTGCACTACT----- mirL 22 6
-----GCTCTGACTAGGTTGCACTACTG----- mirL 23 3
-----GGTGCTCTGACTAGGTTGCAC----- mirL 21 1
-----GCTCTGACTAGGTTGCACTA----- mirL 20 1
-----TGCTCTGACTAGGTTGCAC----- mirL 19 1
-----CTGTGCTGTGAGAAGCAG----- loop 18 1
-----TACTGTGCTGTGAGAAGCAG----- loop 20 1
-----ACTGTGCTGTGAGAAGCAG----- loop 19 1
-----CAGTGCAATGGTATTGTCAAAGCA----- mirR 24 2814
-----CAGTGCAATGGTATTGTCAA----- mirR 21 1441
-----CAGTGCAATGGTATTGTCAA----- mirR 20 801
-----CAGTGCAATGGTATTGTCAAAGC----- mirR 23 686
-----CAGTGCAATGGTATTGTCAAAGCAT----- mirR 25 630
-----CAGTGCAATGGTATTGTCAAAG----- mirR 22 480
-----AGTGCAATGGTATTGTCAAAGCA----- mirR 23 252
-----CAGTGCAATGGTATTGTCA----- mirR 19 142
-----AGTGCAATGGTATTGTCAAAGCAT----- mirR 24 50
-----AGTGCAATGGTATTGTCAAAGC----- mirR 22 48
-----GTGCAATGGTATTGTCAA----- mirR 19 40
-----AGTGCAATGGTATTGTCAA----- mirR 20 36
-----TGCAATGGTATTGTCAAAGCA----- mirR 21 34
-----GTGCAATGGTATTGTCAAAGCA----- mirR 22 30
-----GTGCAATGGTATTGTCAA----- mirR 18 26
-----GTGCAATGGTATTGTCAAAG----- mirR 20 18
-----AGTGCAATGGTATTGTCAA----- mirR 19 18
-----AGTGCAATGGTATTGTCAAAG----- mirR 21 17
-----GTGCAATGGTATTGTCAAAGC----- mirR 21 14
-----AGTGCAATGGTATTGTCAAAGCATC----- mirR 25 8

```

```

-----TGCAATGGTATTGTCAA----- mirR 18 6
-----TGCAATGGTATTGTCAAAG----- mirR 19 3
-----GCAGTGCAATGGTATTGTCAAAGCA----- mirR 25 3
-----TGCAATGGTATTGTCAAAGC----- mirR 20 2
-----TGCAATGGTATTGTCAAAGCAT----- mirR 22 1
-----TGCAATGGTATTGTCAAAGCATC----- mirR 23 1
-----GCAGTGCAATGGTATTGTCAA----- mirR 21 1
-----GCAGTGCAATGGTATTGTCAA----- mirR 22 1
-----TGCAATGGTATTGTCAAAGCATCT----- mirR 24 1
-----GTGCAATGGTATTGTCAAAGCATC----- mirR 24 1
-----CATCTGGGACCAGCCTCGA----- morR 19 3
-----TGGGACCAGCCTCGAAGACC morR 20 1
-----GCATCTGGGACCAGCCTCGA----- morR 20 1

```

>mmu-mir-488

```

GTGAGAGTGAGAATCCTCTCTCCCAGATAATAGCACTCTCAAACAAGTTCCATGTTGTTGAAAGGCTGTTTCTTGTCAGAACTCTCAATTCTTC species len reads
-TGAGAGTGAGAATCCTCTCTC----- morL 21 2
--GAGAGTGAGAATCCTCTC----- morL 18 2
---AGAGTGAGAATCCTCTCT----- morL 18 1
GTGAGAGTGAGAATCCTCT----- morL 19 1
-TGAGAGTGAGAATCCTCTC----- morL 19 1
-----CCCAGATAATAGCACTCTCAA----- mirL 21 3541
-----CCCAGATAATAGCACTCTCA----- mirL 20 1510
-----CCCAGATAATAGCACTCTCAAA----- mirL 22 755
-----CCCAGATAATAGCACTCTC----- mirL 19 656
-----CCCAGATAATAGCACTCT----- mirL 18 269
-----CCCAGATAATAGCACTCTCAAAC----- mirL 23 137
-----AGATAATAGCACTCTCAA----- mirL 18 56
-----CAGATAATAGCACTCTCAA----- mirL 19 47
-----CCCAGATAATAGCACTCTCAAACA----- mirL 24 33
-----CCAGATAATAGCACTCTCAA----- mirL 20 31
-----CAGATAATAGCACTCTCA----- mirL 18 27
-----CCAGATAATAGCACTCTCA----- mirL 19 14
-----CAGATAATAGCACTCTCAAA----- mirL 20 11
-----AGATAATAGCACTCTCAAA----- mirL 19 6
-----CCAGATAATAGCACTCTCAAA----- mirL 21 4
-----CCAGATAATAGCACTCTC----- mirL 18 4
-----TCCCAGATAATAGCACTCTCA----- mirL 21 2
-----CCAGATAATAGCACTCTCAAAC----- mirL 22 2
-----TCCCAGATAATAGCACTCTC----- mirL 20 1
-----TCCCAGATAATAGCACTCTCAA----- mirL 22 1
-----AGATAATAGCACTCTCAAACA----- mirL 22 1
-----TCCCAGATAATAGCACTC----- mirL 18 1
-----TCCCAGATAATAGCACTCT----- mirL 19 1
-----AAACAAGTTTCCATGTTG----- loop 18 2
-----CAAGTTTCCATGTTGTT----- loop 18 1

```

```

-----TTGAAAGGCTGTTTCTTGGT----- mirR 20 174
-----TTGAAAGGCTGTTTCTTGG----- mirR 19 85
-----TTGAAAGGCTGTTTCTTGGTCA----- mirR 22 57
-----TTGAAAGGCTGTTTCTTGG----- mirR 18 41
-----TTGAAAGGCTGTTTCTTGGTC----- mirR 21 34
-----TGAAAGGCTGTTTCTTGG----- mirR 18 19
-----TGAAAGGCTGTTTCTTGGTCA----- mirR 21 12
-----TGAAAGGCTGTTTCTTGGT----- mirR 19 12
-----TTGAAAGGCTGTTTCTTGGTCAG----- mirR 23 8
-----TTTGAAGGCTGTTTCTT----- mirR 18 8
-----TTTGAAGGCTGTTTCTTGGT----- mirR 21 8
-----TGAAAGGCTGTTTCTTGGTC----- mirR 20 6
-----GAAAGGCTGTTTCTTGGTCA----- mirR 20 4
-----AAAGGCTGTTTCTTGGTC----- mirR 18 3
-----TGAAAGGCTGTTTCTTGGTCAGA----- mirR 23 3
-----TTTGAAGGCTGTTTCTTGG----- mirR 20 2
-----TTGAAAGGCTGTTTCTTGGTCAGA----- mirR 24 2
-----TTTGAAGGCTGTTTCTTGGTCA----- mirR 23 2
-----GAAAGGCTGTTTCTTGGT----- mirR 18 2
-----GTTTGAAGGCTGTTTCTT----- mirR 19 1
-----GAAGACTCTCAATTTCTTC morR 19 1
-----AAGACTCTCAATTTCTTC morR 18 1
-----CAGAAGACTCTCAATTTCT-- morR 19 1

```

>mmu-mir-193

```

GACGGACGGGAGCTGAGAGCTGGGTCTTTGCGGGCAAGATGAGAGTGTTCAGTTCAACTGGCCTACAAAGTCCCAGTCTCGGTCCCCAGGACCGGCATT species len reads
-ACGGACGGGAGCTGAGAG----- morL 18 1
GACGGACGGGAGCTGAGAGCT----- morL 21 1
--CGGACGGGAGCTGAGAGC----- morL 18 1
-----TGGGTCTTTGCGGGCAAGATGA----- mirL 22 549
-----TGGGTCTTTGCGGGCAAGATGAG----- mirL 23 58
-----TGGGTCTTTGCGGGCAAGATG----- mirL 21 29
-----TGGGTCTTTGCGGGCAAGAT----- mirL 20 28
-----GGGTCTTTGCGGGCAAGATGA----- mirL 21 17
-----TGGGTCTTTGCGGGCAAG----- mirL 18 17
-----TGGGTCTTTGCGGGCAAGA----- mirL 19 16
-----TGGGTCTTTGCGGGCAAGATGAGA----- mirL 24 4
-----GGGTCTTTGCGGGCAAGATGAG----- mirL 22 3
-----GTCTTTGCGGGCAAGATGA----- mirL 19 3
-----GGTCTTTGCGGGCAAGATGA----- mirL 20 3
-----GGTCTTTGCGGGCAAGAT----- mirL 18 2
-----GGGTCTTTGCGGGCAAGA----- mirL 18 2
-----GGGTCTTTGCGGGCAAGATG----- mirL 20 1
-----GGGTCTTTGCGGGCAAGAT----- mirL 19 1
-----AACTGGCCTACAAAGTCCCA----- mirR 20 2151
-----AACTGGCCTACAAAGTCCCAG----- mirR 21 1526

```

```

-----AACTGGCCTACAAAGTCCCAGTC----- mirR 23 1058
-----AACTGGCCTACAAAGTCCCAGT----- mirR 22 987
-----AACTGGCCTACAAAGTCCC----- mirR 19 575
-----AACTGGCCTACAAAGTCCCAGTCC----- mirR 24 193
-----AACTGGCCTACAAAGTCC----- mirR 18 144
-----TGGCCTACAAAGTCCCAGT----- mirR 19 46
-----TGGCCTACAAAGTCCCAG----- mirR 18 39
-----ACTGGCCTACAAAGTCCCA----- mirR 19 29
-----CTGGCCTACAAAGTCCCA----- mirR 18 24
-----ACTGGCCTACAAAGTCCC----- mirR 18 15
-----ACTGGCCTACAAAGTCCCAGTC----- mirR 22 10
-----CTGGCCTACAAAGTCCCAG----- mirR 19 8
-----ACTGGCCTACAAAGTCCCAG----- mirR 20 8
-----CTGGCCTACAAAGTCCCAGT----- mirR 20 7
-----TGGCCTACAAAGTCCCAGTC----- mirR 20 3
-----ACTGGCCTACAAAGTCCCAGTCC----- mirR 23 3
-----ACTGGCCTACAAAGTCCCAGT----- mirR 21 3
-----CAACTGGCCTACAAAGTCCCAG----- mirR 22 2
-----CAACTGGCCTACAAAGTCCCA----- mirR 21 2
-----CAACTGGCCTACAAAGTCCC----- mirR 20 1
-----CAACTGGCCTACAAAGTC----- mirR 18 1
-----CTGGCCTACAAAGTCCCAGTC----- mirR 21 1
-----CCAGTCCTCGGTCCCCAGG----- morR 19 2
-----TCCTCGGTCCCCAGGACC----- morR 18 1
-----CCTCGGTCCCCAGGACCGGCATT morR 23 1
-----CCAGTCCTCGGTCCCCAG----- morR 18 1

```

>mmu-mir-743b

```

CAGTATGTTGTGTGCAGTGCTGTGTTTCAGACTGGTGTCCATCATGTGAAATATTTGTGAAAGACATCATGCTGAATAGAGT species len reads
CAGTATGTTGTGTGCAGTGC----- morL 20 1
-AGTATGTTGTGTGCAGTG----- morL 18 1
-----GTTGTGTGCAGTGCTGTG----- morL 18 1
-----TGTTTCAGACTGGTGTCCATCA----- mirL 21 1857
-----TGTTTCAGACTGGTGTCCATCAT----- mirL 22 413
-----TGTTTCAGACTGGTGTCCAT----- mirL 19 246
-----TGTTTCAGACTGGTGTCCATC----- mirL 20 106
-----TGTTTCAGACTGGTGTCCA----- mirL 18 91
-----GTTTCAGACTGGTGTCCATCA----- mirL 20 91
-----GTTTCAGACTGGTGTCCATCAT----- mirL 21 19
-----TTCAGACTGGTGTCCATCA----- mirL 19 15
-----GTTTCAGACTGGTGTCCAT----- mirL 18 15
-----TCAGACTGGTGTCCATCA----- mirL 18 15
-----GTTTCAGACTGGTGTCCATC----- mirL 19 12
-----TGTTTCAGACTGGTGTCCATCATG----- mirL 23 11
-----GTGTTTCAGACTGGTGTCCATCA----- mirL 22 5
-----TGTTTCAGACTGGTGTCCATCATGTG----- mirL 25 3

```

```

-----CTGTGTTTCAGACTGGTGT----- mirL 18 1
-----GTTTCAGACTGGTGTCCATCATG----- mirL 22 1
-----TTCAGACTGGTGTCCATC----- mirL 18 1
-----TTCAGACTGGTGTCCATCAT----- mirL 20 1
-----TCAGACTGGTGTCCATCAT----- mirL 19 1
-----CATGTGAAATATTTGTGA----- loop 18 1
-----GAAAGACATCATGCTGAATAG--- mirR 21 2827
-----GAAAGACATCATGCTGAATA--- mirR 20 615
-----GAAAGACATCATGCTGAATAGA-- mirR 22 538
-----GAAAGACATCATGCTGAA----- mirR 18 170
-----GAAAGACATCATGCTGAATAGAG- mirR 23 89
-----AAGACATCATGCTGAATAG--- mirR 19 83
-----GAAAGACATCATGCTGAAT--- mirR 19 83
-----AAAGACATCATGCTGAATAG--- mirR 20 48
-----AGACATCATGCTGAATAG--- mirR 18 36
-----AAGACATCATGCTGAATA--- mirR 18 24
-----AGACATCATGCTGAATAGA-- mirR 19 17
-----AAGACATCATGCTGAATAGA-- mirR 20 8
-----AAAGACATCATGCTGAATAGA-- mirR 21 6
-----AAAGACATCATGCTGAATA--- mirR 19 5
-----TGAAAGACATCATGCTGAATAG--- mirR 22 4
-----TGAAAGACATCATGCTGAATAGA-- mirR 23 3
-----AAAGACATCATGCTGAAT--- mirR 18 3
-----AAGACATCATGCTGAATAGAG- mirR 21 2
-----GAAAGACATCATGCTGAATAGAGT mirR 24 2
-----TGTGAAAGACATCATGCTG----- mirR 19 1
-----AGACATCATGCTGAATAGAGT mirR 21 1
-----TGTGAAAGACATCATGCTGA----- mirR 20 1

```

>mmu-mir-28

| ATAGAGGTGGTCCCTACCTTCAAGGAGCTCACAGTCTATTGAGTTGCCTTTCTGATTCTCCACTAGATTGTGAGCTGCTGGAGGGC | species | len | reads |
|----------------------------------------------------------------------------------------|---------|-----|-------|
| ATAGAGGTGGTCCCTACCT                                                                    | morL    | 19  | 1     |
| -----AAGGAGCTCACAGTCTATTGA-----                                                        | mirL    | 21  | 1337  |
| -----AAGGAGCTCACAGTCTATTG-----                                                         | mirL    | 20  | 741   |
| -----AAGGAGCTCACAGTCTATTGAG-----                                                       | mirL    | 22  | 506   |
| -----AAGGAGCTCACAGTCTAT-----                                                           | mirL    | 18  | 215   |
| -----AAGGAGCTCACAGTCTATTGAGT-----                                                      | mirL    | 23  | 197   |
| -----AAGGAGCTCACAGTCTATT-----                                                          | mirL    | 19  | 196   |
| -----AAGGAGCTCACAGTCTATTGAGTT-----                                                     | mirL    | 24  | 91    |
| -----TCAAGGAGCTCACAGTCTATTG-----                                                       | mirL    | 22  | 29    |
| -----CAAGGAGCTCACAGTCTATTG-----                                                        | mirL    | 21  | 13    |
| -----GAGCTCACAGTCTATTGA-----                                                           | mirL    | 18  | 12    |
| -----AGGAGCTCACAGTCTATTG-----                                                          | mirL    | 19  | 11    |
| -----TCAAGGAGCTCACAGTCTATTGA-----                                                      | mirL    | 23  | 10    |
| -----GAGCTCACAGTCTATTGAG-----                                                          | mirL    | 19  | 10    |
| -----CAAGGAGCTCACAGTCTATTGA-----                                                       | mirL    | 22  | 10    |



```

-----GGAGCTCACAGTCTATTG----- mirL 18 10
-----GGAGCTCACAGTCTATTGA----- mirL 19 10
-----TCAAGGAGCTCACAGTCTAT----- mirL 20 6
-----AGGAGCTCACAGTCTATTGA----- mirL 20 6
-----TCAAGGAGCTCACAGTCTATT----- mirL 21 5
-----AGGAGCTCACAGTCTATT----- mirL 18 5
-----CAAGGAGCTCACAGTCTAT----- mirL 19 4
-----GGAGCTCACAGTCTATTGAG----- mirL 20 4
-----TCAAGGAGCTCACAGTCTA----- mirL 19 3
-----CAAGGAGCTCACAGTCTA----- mirL 18 2
-----CAAGGAGCTCACAGTCTATT----- mirL 20 2
-----CAAGGAGCTCACAGTCTATTGAGT----- mirL 24 2
-----TCAAGGAGCTCACAGTCT----- mirL 18 2
-----TCAAGGAGCTCACAGTCTATTGAG----- mirL 24 1
-----AGGAGCTCACAGTCTATTGAGTT----- mirL 23 1
-----AGGAGCTCACAGTCTATTGAG----- mirL 21 1
-----GTTGCCTTTCTGATTCTC----- loop 18 2
-----GCCTTTCTGATTCTCCCA----- loop 18 2
-----TTGCCTTTCTGATTCTCCAC----- loop 21 1
-----TGCCTTTCTGATTCTCCC----- loop 18 1
-----CACTAGATTGTGAGCTGCTGGA--- mirR 22 1816
-----CACTAGATTGTGAGCTGCTGG--- mirR 21 691
-----CACTAGATTGTGAGCTGCTGGAG--- mirR 23 372
-----CACTAGATTGTGAGCTGCTG----- mirR 20 182
-----CACTAGATTGTGAGCTGCT----- mirR 19 74
-----CACTAGATTGTGAGCTGC----- mirR 18 60
-----ACTAGATTGTGAGCTGCTGGA--- mirR 21 54
-----ACTAGATTGTGAGCTGCTGG--- mirR 20 47
-----ACTAGATTGTGAGCTGCTGGAG--- mirR 22 36
-----CACTAGATTGTGAGCTGCTGGAGG-- mirR 24 35
-----TAGATTGTGAGCTGCTGGA--- mirR 19 35
-----CTAGATTGTGAGCTGCTGGA--- mirR 20 29
-----ACTAGATTGTGAGCTGCTG----- mirR 19 27
-----TAGATTGTGAGCTGCTGG--- mirR 18 26
-----CTAGATTGTGAGCTGCTGG--- mirR 19 11
-----ACTAGATTGTGAGCTGCT----- mirR 18 11
-----CTAGATTGTGAGCTGCTG----- mirR 18 10
-----CTAGATTGTGAGCTGCTGGAG--- mirR 21 8
-----TAGATTGTGAGCTGCTGGAG--- mirR 20 7
-----CCACTAGATTGTGAGCTGCTGG--- mirR 22 7
-----CCACTAGATTGTGAGCTGC----- mirR 19 5
-----ACTAGATTGTGAGCTGCTGGAGG-- mirR 23 5
-----CCACTAGATTGTGAGCTG----- mirR 18 4
-----CCACTAGATTGTGAGCTGCTG----- mirR 21 3
-----CCACTAGATTGTGAGCTGCTGGA--- mirR 23 2
-----ACTAGATTGTGAGCTGCTGGAGG-- mirR 25 2

```

```

-----CCACTAGATTGTGAGCTGCTGGAGG-- mirR 25 2
-----TCCCCTAGATTGTGAGC----- mirR 18 1
-----CTAGATTGTGAGCTGCTGGAGGG-- mirR 23 1
-----CTAGATTGTGAGCTGCTGGAGG-- mirR 22 1

>mmu-mir-106a
TCAAAGTGCTAACAGTGCAGGTAGCTTTTTGAGTTCTACTGCAGTGCCAGCACTTCTTACATTACCATGGTGATTTAATC species len reads
-CAAAGTGCTAACAGTGCAGGTA----- mirL 22 2529
-CAAAGTGCTAACAGTGCAGGTAG----- mirL 23 1330
-CAAAGTGCTAACAGTGCAGGT----- mirL 21 1296
-CAAAGTGCTAACAGTGCAG----- mirL 19 375
---AGTGCTAACAGTGCAGGTA----- mirL 19 205
-CAAAGTGCTAACAGTGCAGG----- mirL 20 195
-CAAAGTGCTAACAGTGCAGGTAGC----- mirL 24 161
---AGTGCTAACAGTGCAGGTAG----- mirL 20 142
---AAGTGCTAACAGTGCAGGTAG----- mirL 21 106
--AAAGTGCTAACAGTGCAGGTA----- mirL 21 105
--AAGTGCTAACAGTGCAGGTA----- mirL 20 101
--AAAGTGCTAACAGTGCAGGTAG----- mirL 22 70
---AGTGCTAACAGTGCAGGT----- mirL 18 46
-CAAAGTGCTAACAGTGCA----- mirL 18 42
---AAGTGCTAACAGTGCAGGT----- mirL 19 31
--AAAGTGCTAACAGTGCAGGT----- mirL 20 30
--AAAGTGCTAACAGTGCAGGTAGC----- mirL 23 26
---AGTGCTAACAGTGCAGGTAGC----- mirL 21 17
---AAGTGCTAACAGTGCAGGTAGC----- mirL 22 13
--AAAGTGCTAACAGTGCAG----- mirL 18 7
---AAGTGCTAACAGTGCAGG----- mirL 18 7
TCAAAGTGCTAACAGTGCAGGTA----- mirL 23 4
--AAAGTGCTAACAGTGCAGG----- mirL 19 4
TCAAAGTGCTAACAGTGCAGGT----- mirL 22 2
TCAAAGTGCTAACAGTGCAGGTAG----- mirL 24 2
---AAGTGCTAACAGTGCAGGTAGCT----- mirL 23 1
-----TAGCTTTTTGAGTTCTACT----- loop 19 6
-----AGCTTTTTGAGTTCTACT----- loop 18 1
-----CTGCAGTGCCAGCACTTCTTA----- mirR 21 23
-----ACTGCAGTGCCAGCACTTCTTAC----- mirR 23 11
-----CAGTGCCAGCACTTCTTACA----- mirR 20 6
-----ACTGCAGTGCCAGCACTTCT----- mirR 20 6
-----ACTGCAGTGCCAGCACTTCTT----- mirR 21 5
-----CTGCAGTGCCAGCACTTCTT----- mirR 20 3
-----ACTGCAGTGCCAGCACTTC----- mirR 19 3
-----ACTGCAGTGCCAGCACTTCTTACA----- mirR 24 2
-----CTGCAGTGCCAGCACTTCT----- mirR 19 2
-----CTGCAGTGCCAGCACTTC----- mirR 18 2
-----ACTGCAGTGCCAGCACTT----- mirR 18 2

```

```

-----GCAGTGCCAGCACTTCTTAC----- mirR 20 1
-----TGCAGTGCCAGCACTTCTT----- mirR 19 1
-----TGCAGTGCCAGCACTTCTTACA----- mirR 22 1
-----TACTGCAGTGCCAGCACTT----- mirR 19 1
-----CTACTGCAGTGCCAGCACT----- mirR 19 1
-----CTGCAGTGCCAGCACTTCTTAC----- mirR 22 1
-----TGCAGTGCCAGCACTTCTTAC----- mirR 21 1
-----GCAGTGCCAGCACTTCTTACA----- mirR 21 1
-----ACATTACCATGGTGATTTA----- morR 19 1
-----TACATTACCATGGTGATT----- morR 18 1
-----TACCATGGTGATTTAATC morR 18 1
-----ATTACCATGGTGATTTAA----- morR 18 1
-----ACATTACCATGGTGATT----- morR 18 1

```

>mmu-mir-1899

```

TCAGCGATGGCCGAATCTGCTTCCTCCTGGTTAGAAATGAATGTGCTAAGTGATTCAGATTCTGCTCATTCCGTTGATTACACATAATTCAAAGAATGGTGTATTATGCACCATCCCCTCTGAATTGACT species
--AGCGATGGCCGAATCTGCTTCC----- mirL 22 4
--AGCGATGGCCGAATCTGCTTCCT----- mirL 23 9
--AGCGATGGCCGAATCTGCTTC----- mirL 21 6
--AGCGATGGCCGAATCTGCTT----- mirL 20 2
--AGCGATGGCCGAATCTGCT----- mirL 19 1
--GCGATGGCCGAATCTGCTTCC----- mirL 21 1
--AGCGATGGCCGAATCTGCT----- mirL 18 7
--AGCGATGGCCGAATCTGCTTCCT----- mirL 24 6
---CGATGGCCGAATCTGCTTCC----- mirL 20 5
---GATGGCCGAATCTGCTTCC----- mirL 19 4
---GATGGCCGAATCTGCTTC----- mirL 18 1
---GCGATGGCCGAATCTGCTTCCT----- mirL 22 1
---GCGATGGCCGAATCTGCTTC----- mirL 20 1
---GCGATGGCCGAATCTGCTT----- mirL 19 1
---CGATGGCCGAATCTGCTT----- mirL 18 8
---CGATGGCCGAATCTGCTTC----- mirL 19 7
---CGATGGCCGAATCTGCTTCCT----- mirL 21 6
---GCGATGGCCGAATCTGCTTCCTC----- mirL 23 5
-CAGCGATGGCCGAATCTGCTTCC----- mirL 23 4
---GATGGCCGAATCTGCTTCCT----- mirL 20 3
TCAGCGATGGCCGAATCT----- mirL 18 2
---GCGATGGCCGAATCTGCT----- mirL 18 2
---GCGATGGCCGAATCTGCTTCCTC----- mirL 24 1
---CGATGGCCGAATCTGCTTCCTC----- mirL 22 1
-CAGCGATGGCCGAATCTGCTT----- mirL 21 1
-CAGCGATGGCCGAATCTGCT----- mirL 20 1
-----TCCCCTCTGAATTGACT mirR 18 8
-----ATCCCCTCTGAATTGAC----- mirR 18 1

```

>mmu-mir-344b

| Sequence                                                                                                       | species | len | reads |
|----------------------------------------------------------------------------------------------------------------|---------|-----|-------|
| ATTCTCTGCAGCCAGGATTTTCATCAGTCAGGCTCCTGGCTAAAGTTTCAGCTTTTCAGCTGCATTTAGCCAAAGCCTGACTGTAA                         | morL    | 18  | 1     |
| ----TCTGCAGCCAGGATTTTC-----                                                                                    | morL    | 19  | 1     |
| ATTCTCTGCAGCCAGGATT-----                                                                                       | morL    | 18  | 1     |
| ---CTCTGCAGCCAGGATTTT-----                                                                                     | morL    | 19  | 1     |
| ----TCTGCAGCCAGGATTTTCA-----                                                                                   | morL    | 19  | 1     |
| ---CTCTGCAGCCAGGATTTTC-----                                                                                    | morL    | 18  | 1     |
| -----TGCAGCCAGGATTTTCAT-----                                                                                   | mirL    | 19  | 4     |
| -----TCATCAGTCAGGCTCCTGG-----                                                                                  | mirL    | 18  | 2     |
| -----ATCAGTCAGGCTCCTGGC-----                                                                                   | mirL    | 18  | 2     |
| -----TCATCAGTCAGGCTCCTG-----                                                                                   | mirL    | 20  | 1     |
| -----TCATCAGTCAGGCTCCTGGC-----                                                                                 | mirL    | 24  | 1     |
| -----AGTCAGGCTCCTGGCTAAAGTTCA-----                                                                             | mirL    | 19  | 1     |
| -----CATCAGTCAGGCTCCTGGC-----                                                                                  | loop    | 18  | 1     |
| -----AGTTTCAGCTTTTCAGCTGC-----                                                                                 | mirR    | 22  | 5667  |
| -----CATTAGCCAAAGCCTGACTGT-----                                                                                | mirR    | 19  | 303   |
| -----CATTAGCCAAAGCCTGACTGAC-----                                                                               | mirR    | 23  | 287   |
| -----CATTAGCCAAAGCCTGACTGT-----                                                                                | mirR    | 24  | 190   |
| -----CATTAGCCAAAGCCTGACTGTAA-----                                                                              | mirR    | 20  | 177   |
| -----CATTAGCCAAAGCCTGACT-----                                                                                  | mirR    | 21  | 153   |
| -----CATTAGCCAAAGCCTGA-----                                                                                    | mirR    | 18  | 54    |
| -----GCATTTAGCCAAAGCCTGACTGT-----                                                                              | mirR    | 23  | 15    |
| -----ATTTAGCCAAAGCCTGACTGT-----                                                                                | mirR    | 21  | 10    |
| -----TTAGCCAAAGCCTGACTGTAA-----                                                                                | mirR    | 21  | 7     |
| -----ATTTAGCCAAAGCCTGACTGTAA-----                                                                              | mirR    | 23  | 6     |
| -----TGCATTTAGCCAAAGCCTGACTGT-----                                                                             | mirR    | 24  | 4     |
| -----TTAGCCAAAGCCTGACTGT-----                                                                                  | mirR    | 19  | 3     |
| -----ATTTAGCCAAAGCCTGACTGTA-----                                                                               | mirR    | 22  | 1     |
| -----GCATTTAGCCAAAGCCTGA-----                                                                                  | mirR    | 19  | 1     |
| -----ATTTAGCCAAAGCCTGAC-----                                                                                   | mirR    | 18  | 1     |
| -----GCATTTAGCCAAAGCCTGACT-----                                                                                | mirR    | 21  | 1     |
| -----GCATTTAGCCAAAGCCTGACTG-----                                                                               | mirR    | 22  | 1     |
| -----GCATTTAGCCAAAGCCTGAC-----                                                                                 | mirR    | 20  | 1     |
| <br>                                                                                                           |         |     |       |
| >mmu-mir-182                                                                                                   |         |     |       |
| TGCTGGAGGCCTCCCACCATTTTTGGCAATGGTAGAACTCACACCGGTAAGGTAATGGGACCCGGTGGTTCTAGACTTGCCAACTATGGTGTAAGTGCTGAGCTGCTGAA | species | len | reads |
| TGCTGGAGGCCTCCCACC-----                                                                                        | morL    | 18  | 2     |
| ----GGAGGCCTCCCACCATTTT-----                                                                                   | morL    | 19  | 1     |
| -----TTTGGCAATGGTAGAACTCACAC-----                                                                              | mirL    | 23  | 1413  |
| -----TTTGGCAATGGTAGAACTCACACC-----                                                                             | mirL    | 24  | 1405  |
| -----TTTGGCAATGGTAGAACTCACA-----                                                                               | mirL    | 22  | 808   |
| -----TTTGGCAATGGTAGAACTCAC-----                                                                                | mirL    | 21  | 677   |
| -----TTTGGCAATGGTAGAACTCACACCG-----                                                                            | mirL    | 25  | 646   |
| -----TTTGGCAATGGTAGAACTCA-----                                                                                 | mirL    | 20  | 330   |
| -----GGCAATGGTAGAACTCACACC-----                                                                                | mirL    | 21  | 132   |
| -----TTTGGCAATGGTAGAACTCACACCG-----                                                                            | mirL    | 26  | 128   |

```

-----GGCAATGGTAGAACTCACACCG----- mirL 22 115
-----TTGGCAATGGTAGAACTCACACC----- mirL 23 113
-----TGGCAATGGTAGAACTCACACC----- mirL 22 79
-----TTGGCAATGGTAGAACTCACAC----- mirL 22 67
-----TGGCAATGGTAGAACTCACACCG----- mirL 23 58
-----GGCAATGGTAGAACTCACA----- mirL 19 56
-----TTGGCAATGGTAGAACTCACA----- mirL 21 54
-----TTGGCAATGGTAGAACTCACACCG----- mirL 24 53
-----TGGCAATGGTAGAACTCACA----- mirL 20 47
-----GGCAATGGTAGAACTCACAC----- mirL 20 47
-----TGGCAATGGTAGAACTCACAC----- mirL 21 41
-----GGCAATGGTAGAACTCACACCGG----- mirL 23 33
-----TGGCAATGGTAGAACTCACACCGG----- mirL 24 22
-----TTGGCAATGGTAGAACTCAC----- mirL 20 19
-----GGCAATGGTAGAACTCAC----- mirL 18 19
-----TTGGCAATGGTAGAACTCA----- mirL 19 17
-----TGGCAATGGTAGAACTCAC----- mirL 19 13
-----TGGCAATGGTAGAACTCA----- mirL 18 9
-----TTGGCAATGGTAGAACTC----- mirL 18 7
-----TTTTGGCAATGGTAGAACTCA----- mirL 21 1
-----TTTTGGCAATGGTAGAACTCACACC----- mirL 25 1
-----GTAAGGTAATGGGACCG----- loop 18 3
-----ACCGGTAAGGTAATGGGACC----- loop 20 1
-----GGTAAGGTAATGGGACCC----- loop 18 1
-----TGGTTCTAGACTTGCCAATA----- mirR 21 150
-----TGGTTCTAGACTTGCCAACT----- mirR 20 148
-----TGGTTCTAGACTTGCCAAC----- mirR 19 37
-----TGGTTCTAGACTTGCCAA----- mirR 18 21
-----TGGTTCTAGACTTGCCAATAT----- mirR 22 20
-----GGTTCTAGACTTGCCAATA----- mirR 20 11
-----GGTTCTAGACTTGCCAACT----- mirR 19 10
-----TGGTTCTAGACTTGCCAATATG----- mirR 23 5
-----TTCTAGACTTGCCAATA----- mirR 18 3
-----GTTCTAGACTTGCCAACT----- mirR 18 3
-----GGTTCTAGACTTGCCAAC----- mirR 18 3
-----GGTGGTTCTAGACTTGCCAAC----- mirR 21 2
-----GGTTCTAGACTTGCCAATAT----- mirR 21 1
-----GTTCTAGACTTGCCAATA----- mirR 19 1
-----GGTGGTTCTAGACTTGCCAA----- mirR 20 1
-----GGTTCTAGACTTGCCAATATG----- mirR 22 1
-----TGTAAGTGCTGAGCTGCTGA----- morR 20 7
-----TGTAAGTGCTGAGCTGCTG----- morR 19 4
-----ATGGTGTAAGTGCTGAGCT----- morR 19 2
-----GGTGTAAGTGCTGAGCTGC----- morR 19 1
-----ATGGTGTAAGTGCTGAGC----- morR 18 1
-----TGTAAGTGCTGAGCTGCTGAA----- morR 21 1

```

```

-----TGTAAGTGCTGAGCTGCT--- morR 18 1

>mmu-mir-214
GCTGGACAGAGTTGTCATGTGTCTGCCTGTCTACACTTGCTGTGCAGAACATCCGCTCACCTGTACAGCAGGCACAGACAGGCAGTCACATGACAACCCAGCCTGAA species len reads
GCTGGACAGAGTTGTCATGTG----- morL 21 1
-----AGAGTTGTCATGTGTCTGC----- morL 19 1
--TGGACAGAGTTGTCATGT----- morL 18 1
-----TGCCTGTCTACACTTGCTGTGC----- mirL 22 325
-----TGCCTGTCTACACTTGCT----- mirL 18 95
-----TGCCTGTCTACACTTGCTGTG----- mirL 21 70
-----TGCCTGTCTACACTTGCTG----- mirL 19 39
-----GCCTGTCTACACTTGCTGTGC----- mirL 21 25
-----TGCCTGTCTACACTTGCTGT----- mirL 20 24
-----TGCCTGTCTACACTTGCTGTGCA----- mirL 23 17
-----CTGTCTACACTTGCTGTGC----- mirL 19 11
-----CTGTCTACACTTGCTGTG----- mirL 18 11
-----CCTGTCTACACTTGCTGTGC----- mirL 20 9
-----GCCTGTCTACACTTGCTGTG----- mirL 20 5
-----CCTGTCTACACTTGCTGTG----- mirL 19 5
-----GCCTGTCTACACTTGCTGT----- mirL 19 2
-----CCTGTCTACACTTGCTGT----- mirL 18 2
-----GCCTGTCTACACTTGCTGTGCAG----- mirL 23 1
-----CTGCCTGTCTACACTTGCT----- mirL 19 1
-----ACAGCAGGCACAGACAGGCAG----- mirR 21 2835
-----ACAGCAGGCACAGACAGGCAGT----- mirR 22 1341
-----ACAGCAGGCACAGACAGGCAGCA----- mirR 20 559
-----ACAGCAGGCACAGACAGGCAGTC----- mirR 23 385
-----ACAGCAGGCACAGACAGGC----- mirR 19 278
-----ACAGCAGGCACAGACAGG----- mirR 18 162
-----AGCAGGCACAGACAGGCAG----- mirR 19 74
-----CAGCAGGCACAGACAGGCAG----- mirR 20 58
-----AGCAGGCACAGACAGGCAGT----- mirR 20 38
-----GCAGGCACAGACAGGCAG----- mirR 18 36
-----TACAGCAGGCACAGACAGGCAG----- mirR 22 27
-----CAGCAGGCACAGACAGGCAGT----- mirR 21 25
-----ACAGCAGGCACAGACAGGCAGTCA----- mirR 24 19
-----AGCAGGCACAGACAGGCAG----- mirR 18 16
-----GCAGGCACAGACAGGCAGT----- mirR 19 16
-----AGCAGGCACAGACAGGCAGTC----- mirR 21 11
-----CAGCAGGCACAGACAGGCAG----- mirR 19 11
-----TACAGCAGGCACAGACAGGC----- mirR 20 9
-----TACAGCAGGCACAGACAGGCAGCA----- mirR 21 8
-----TACAGCAGGCACAGACAGGCAGTC----- mirR 24 7
-----CAGCAGGCACAGACAGGCAGTC----- mirR 22 6
-----TACAGCAGGCACAGACAGGCAGT----- mirR 23 6
-----TACAGCAGGCACAGACAG----- mirR 18 5

```

```

-----TACAGCAGGCACAGACAGG----- mirR 19 4
-----AGCAGGCACAGACAGGCAGTCA----- mirR 22 3
-----CAGCAGGCACAGACAGGC----- mirR 18 3
-----GCAGGCACAGACAGGCAGTC----- mirR 20 2
-----GTACAGCAGGCACAGACAGGCAG----- mirR 23 1
-----TCACATGACAACCCAGCC----- morR 18 2
-----CAGTCACATGACAACCCA----- morR 18 1
-----TCACATGACAACCCAGCCT----- morR 19 1
-----CATGACAACCCAGCCTGA----- morR 18 1
-----CATGACAACCCAGCCTGAA----- morR 19 1

>mmu-mir-412
CGCTCTGGGGTATGGGACGGATGGTTCGACCAGCTGGAAAAGTAATTGTTTCTAATGTACTTCACCTGGTCCACTAGCCGTCGGTGCCCGCTGCAGCCTGCGCCCAG species len reads
-GCTCTGGGGTATGGGACGGA----- morL 20 4
CGCTCTGGGGTATGGGACGGA----- morL 21 3
CGCTCTGGGGTATGGGACG----- morL 19 1
-----GGGGTATGGGACGGATGG----- morL 18 1
-----TGGTCGACCAGCTGGAAAAGTAA----- mirL 22 755
-----TGGTCGACCAGCTGGAAAAGTAAT----- mirL 23 414
-----TGGTCGACCAGCTGGAAAAGTAA----- mirL 21 227
-----TGGTCGACCAGCTGGAAAAGT----- mirL 20 153
-----TGGTCGACCAGCTGGAAAAG----- mirL 19 39
-----TGGTCGACCAGCTGGAAA----- mirL 18 32
-----TGGTCGACCAGCTGGAAAAGTAATT----- mirL 24 25
-----GGTCGACCAGCTGGAAAAGTAA----- mirL 21 16
-----GATGGTCGACCAGCTGGAAAAGT----- mirL 22 7
-----ATGGTCGACCAGCTGGAAAAGT----- mirL 21 6
-----ATGGTCGACCAGCTGGAAAAGTAA----- mirL 23 6
-----ATGGTCGACCAGCTGGAAAAGTAA----- mirL 22 5
-----GGTCGACCAGCTGGAAAAGTAAT----- mirL 22 5
-----GATGGTCGACCAGCTGGAAA----- mirL 20 3
-----GGTCGACCAGCTGGAAAAGT----- mirL 19 3
-----GGTCGACCAGCTGGAAAAGTAA----- mirL 20 2
-----ATGGTCGACCAGCTGGAAAAG----- mirL 20 1
-----GATGGTCGACCAGCTGGAAAAGTAA----- mirL 23 1
-----GATGGTCGACCAGCTGGAAA----- mirL 19 1
-----ATGGTCGACCAGCTGGAAA----- mirL 19 1
-----ATGGTCGACCAGCTGGAAA----- mirL 18 1
-----ACTTCACCTGGTCCACTAGCCGT----- mirR 23 1794
-----ACTTCACCTGGTCCACTAGCCGTC----- mirR 24 436
-----TTCACCTGGTCCACTAGCCGT----- mirR 21 341
-----TTCACCTGGTCCACTAGCCG----- mirR 20 341
-----ACTTCACCTGGTCCACTAGCCG----- mirR 22 336
-----CTTCACCTGGTCCACTAGCCGT----- mirR 22 324
-----CTTCACCTGGTCCACTAGCCGTC----- mirR 23 278
-----CTTCACCTGGTCCACTAGCCG----- mirR 21 196

```

```

-----CTTCACCTGGTCCACTAGC----- mirR 19 138
-----ACTTCACCTGGTCCACTAGCC----- mirR 21 92
-----TCACCTGGTCCACTAGCCGT----- mirR 20 78
-----CTTCACCTGGTCCACTAGCC----- mirR 20 78
-----TTCACCTGGTCCACTAGC----- mirR 18 76
-----ACTTCACCTGGTCCACTAGC----- mirR 20 60
-----TTCACCTGGTCCACTAGCCGTC----- mirR 22 49
-----TCACCTGGTCCACTAGCCG----- mirR 19 47
-----TTCACCTGGTCCACTAGCC----- mirR 19 38
-----ACTTCACCTGGTCCACTAGCCGTCG----- mirR 25 36
-----ACTTCACCTGGTCCACTA----- mirR 18 18
-----TTCACCTGGTCCACTAGCCGTCG----- mirR 23 14
-----CTTCACCTGGTCCACTAGCCGTCG----- mirR 24 13
-----TCACCTGGTCCACTAGCCGTC----- mirR 21 10
-----GTACTTCACCTGGTCCACTAGC----- mirR 22 10
-----GTACTTCACCTGGTCCACTA----- mirR 20 8
-----CTTCACCTGGTCCACTAG----- mirR 18 8
-----TACTTCACCTGGTCCACTAGCC----- mirR 22 8
-----TACTTCACCTGGTCCACTAGC----- mirR 21 6
-----GTACTTCACCTGGTCCACTAGCC----- mirR 23 6
-----TCACCTGGTCCACTAGCC----- mirR 18 5
-----TACTTCACCTGGTCCACTAGCCGT----- mirR 24 5
-----GTACTTCACCTGGTCCACTAG----- mirR 21 4
-----TACTTCACCTGGTCCACTAG----- mirR 20 4
-----TGTACTTCACCTGGTCCAC----- mirR 19 4
-----TGTACTTCACCTGGTCCACTA----- mirR 21 3
-----TACTTCACCTGGTCCACTA----- mirR 19 3
-----TACTTCACCTGGTCCACTAGCCG----- mirR 23 2
-----TGTACTTCACCTGGTCCACTAG----- mirR 22 2
-----TGTACTTCACCTGGTCCACT----- mirR 20 2
-----TCACCTGGTCCACTAGCCGTCGGTGCC----- mirR 27 1
-----TACTTCACCTGGTCCACT----- mirR 18 1
-----GTACTTCACCTGGTCCAC----- mirR 18 1
-----TGTACTTCACCTGGTCCACTAGCC----- mirR 24 1
-----TTCACCTGGTCCACTAGCCGTCGG----- mirR 24 1
-----TGTACTTCACCTGGTCCACTAGC----- mirR 23 1
-----TGCCCCTGCAGCCTGCGCCAG morR 23 1
-----CGTCGGTGCCCGCTGCAG morR 18 1
-----TGCCCCTGCAGCCTGCGCC morR 20 1
-----GGTGCCCGCTGCAGCCTGC morR 19 1

```

>mmu-mir-144

```

CCTCCTCCTCCAGGACCTTGCTGGGATATCATCATATACTGTAAGTTTGTGATGAGACACTACAGTATAGATGATGTACTAGTCTGGGTACCCACCTCC species len reads
-----TCCTCCAGGACCTTGCT----- morL 18 2
-----CCTCCTCCAGGACCTTGCC----- morL 19 2
-----CCAGGACCTTGCTGGGA----- morL 18 1

```



```

-----CTCCAGGACCTTGGCTGGGA----- morL 20 1
CCTCCTCCTCCAGGACCTTGG----- morL 21 1
-----CTCCAGGACCTTGGCTGG----- morL 18 1
---CCTCCTCCTCCAGGACCTTGG----- morL 18 1
-----GGATATCATCATATACTGTAA----- mirL 21 2169
-----GGATATCATCATATACTGTAAG----- mirL 22 1950
-----GGATATCATCATATACTGTAAGT----- mirL 23 283
-----GGATATCATCATATACTGTA----- mirL 20 219
-----GGATATCATCATATACTGT----- mirL 19 165
-----GGATATCATCATATACTG----- mirL 18 83
-----TGGGATATCATCATATACTGT----- mirL 21 78
-----GGATATCATCATATACTGTAAGTT----- mirL 24 58
-----TGGGATATCATCATATACTGTAA----- mirL 23 33
-----TGGGATATCATCATATACTG----- mirL 20 31
-----GGGATATCATCATATACTGTAA----- mirL 22 12
-----TATCATCATATACTGTAA----- mirL 18 12
-----GATATCATCATATACTGTAAG----- mirL 21 9
-----ATATCATCATATACTGTAA----- mirL 19 8
-----GATATCATCATATACTGTAA----- mirL 20 7
-----TGGGATATCATCATATACTGTA----- mirL 22 7
-----GGGATATCATCATATACTGTAAG----- mirL 23 4
-----ATATCATCATATACTGTAAG----- mirL 20 4
-----TGGGATATCATCATATACTGTAAG----- mirL 24 4
-----GATATCATCATATACTGTAAGTT----- mirL 23 3
-----TGGGATATCATCATATAC----- mirL 18 3
-----GGGATATCATCATATACTGT----- mirL 20 3
-----TGGGATATCATCATATACT----- mirL 19 3
-----TATCATCATATACTGTAAG----- mirL 19 2
-----ATATCATCATATACTGTA----- mirL 18 2
-----TATCATCATATACTGTAAGT----- mirL 20 1
-----GATATCATCATATACTGTA----- mirL 19 1
-----GTTTGTGATGAGACACTA----- loop 18 6
-----AGTTTGTGATGAGACACT----- loop 18 3
-----AGTTTGTGATGAGACACTA----- loop 19 1
-----AAGTTTGTGATGAGACACT----- loop 19 1
-----TACAGTATAGATGATGTACT----- mirR 20 396
-----TACAGTATAGATGATGTAC----- mirR 19 301
-----TACAGTATAGATGATGTA----- mirR 18 218
-----TACAGTATAGATGATGTACTA----- mirR 21 177
-----TACAGTATAGATGATGTACTAG----- mirR 22 101
-----ACAGTATAGATGATGTACT----- mirR 19 27
-----TACAGTATAGATGATGTACTAGT----- mirR 23 26
-----ACAGTATAGATGATGTAC----- mirR 18 22
-----CTACAGTATAGATGATGTACT----- mirR 21 12
-----ACAGTATAGATGATGTACTA----- mirR 20 11
-----CTACAGTATAGATGATGTA----- mirR 19 11

```

```

-----CTACAGTATAGATGATGTACTA----- mirR 22 11
-----CTACAGTATAGATGATGTAC----- mirR 20 10
-----CTACAGTATAGATGATGT----- mirR 18 4
-----ACAGTATAGATGATGTACTAG----- mirR 21 4
-----CAGTATAGATGATGTACTAG----- mirR 20 3
-----TACAGTATAGATGATGTACTAGTC----- mirR 24 3
-----CAGTATAGATGATGTACTA----- mirR 19 3
-----CTACAGTATAGATGATGTACTAG----- mirR 23 2
-----AGTATAGATGATGTACTA----- mirR 18 2
-----AGTATAGATGATGTACTAG----- mirR 19 2
-----CACTACAGTATAGATGAT----- mirR 18 1
-----GTCTGGGTACCCACCTC----- morR 18 3
-----TCTGGGTACCCACCTCC morR 18 1
-----GTCTGGGTACCCACCTCC morR 19 1

```

>mmu-mir-720

```

TCAACCCTGGAGCCCCAGAAATGAAGATGCAGCTTTAGAATTTGGGTGGTCTATCTCGCTGGGGCCTCCAGAAAATGTGAATCCCA species len reads
-CAACCCTGGAGCCCCAGAA----- morL 19 1
--AACCCTGGAGCCCCAGAA----- morL 18 1
--ACCCTGGAGCCCCAGAA----- morL 18 1
-CAACCCTGGAGCCCCAGAA----- morL 18 1
TCAACCCTGGAGCCCCAG----- morL 18 1
-----AATGAAGATGCAGCTTTA----- mirL 18 1
-----ATCTCGCTGGGGCCTCCA----- mirR 18 4039
-----ATCTCGCTGGGGCCTCCAG----- mirR 19 962
-----TCTCGCTGGGGCCTCCAG----- mirR 18 783
-----TCTCGCTGGGGCCTCCAGA----- mirR 19 126
-----ATCTCGCTGGGGCCTCCAGA----- mirR 20 91
-----TCTCGCTGGGGCCTCCAGAA----- mirR 20 48
-----ATCTCGCTGGGGCCTCCAGAA----- mirR 21 40
-----CTCGCTGGGGCCTCCAGA----- mirR 18 13
-----TCTCGCTGGGGCCTCCAGAAA----- mirR 21 13
-----TATCTCGCTGGGGCCTCCA----- mirR 19 12
-----ATCTCGCTGGGGCCTCCAGAAA----- mirR 22 10
-----ATCTCGCTGGGGCCTCCAGAAAA----- mirR 23 5
-----TCTCGCTGGGGCCTCCAGAAAA----- mirR 22 4
-----TATCTCGCTGGGGCCTCCAG----- mirR 20 4
-----ATCTCGCTGGGGCCTCCAGAAAAT----- mirR 24 2
-----TCGCTGGGGCCTCCAGAAAATG----- mirR 22 2
-----TCGCTGGGGCCTCCAGAAA----- mirR 19 2
-----TATCTCGCTGGGGCCTCC----- mirR 18 2
-----CTATCTCGCTGGGGCCTCCA----- mirR 20 1
-----TATCTCGCTGGGGCCTCCAGAA----- mirR 22 1
-----CTCGCTGGGGCCTCCAGAA----- mirR 19 1
-----TCGCTGGGGCCTCCAGAA----- mirR 18 1
-----CTATCTCGCTGGGGCCTC----- mirR 18 1

```

```

-----CAGAAAATGTGAATCCCA morR 18 1

>mmu-mir-760
GCCTCGGTGCGGGGCGCGTCCCGCCCTCAGGCCACCAGAGCCCGGATACCTCAGAAAATTCGGCTCTGGGTCTGTGGGGAGCGAAATGCAACCCAAACCCCGTTTC species len reads
GCCTCGGTGCGGGGCGCGTCCG-----morL 21 1
-----CCCTCAGGCCACCAGAGCCCG-----mirL 22 97
-----CCCTCAGGCCACCAGAGCCCGG-----mirL 23 84
-----CCCTCAGGCCACCAGAGCC-----mirL 19 81
-----CCCTCAGGCCACCAGAGCCCGGATA-----mirL 26 58
-----CCCTCAGGCCACCAGAGCCCGGA-----mirL 24 56
-----CCCTCAGGCCACCAGAGCCCG-----mirL 21 47
-----CCCTCAGGCCACCAGAGCCCG-----mirL 20 41
-----CTCAGGCCACCAGAGCCCG-----mirL 19 5
-----CCTCAGGCCACCAGAGCCCG-----mirL 19 4
-----CCTCAGGCCACCAGAGCCCG-----mirL 20 3
-----CTCAGGCCACCAGAGCCCGG-----mirL 20 2
-----CCCCCTCAGGCCACCAG-----mirL 18 2
-----CTCAGGCCACCAGAGCCCG-----mirL 18 2
-----CCCCCTCAGGCCACCAGAGCC-----mirL 21 1
-----CCCCCTCAGGCCACCAGAG-----mirL 20 1
-----CCCTCAGGCCACCAGAGCCCG-----mirL 19 1
-----CCCCCTCAGGCCACCAGAGCCCG-----mirL 22 1
-----CCTCAGGCCACCAGAGCCCGGATA-----mirL 24 1
-----CCTCAGGCCACCAGAGCCCG-----mirL 18 1
-----CCCTCAGGCCACCAGAGCCCG-----mirL 18 1
-----CCCCCTCAGGCCACCAGAGCCCG-----mirL 22 1
-----CCTCAGGCCACCAGAGCCCGG-----mirL 21 1
-----GCCCCCTCAGGCCACCAGAGCCCGGA-----mirL 27 1
-----CCCTCAGGCCACCAGAGCCCG-----mirL 21 1
-----CGGCTCTGGGTCTGTGGGGAGC-----mirR 22 1119
-----CGGCTCTGGGTCTGTGGGGAG-----mirR 21 909
-----CGGCTCTGGGTCTGTGGGGAGCGA-----mirR 24 578
-----CGGCTCTGGGTCTGTGGGGGA-----mirR 20 542
-----CGGCTCTGGGTCTGTGGGGAGCG-----mirR 23 531
-----TCGGCTCTGGGTCTGTGGGGAGC-----mirR 23 426
-----TCGGCTCTGGGTCTGTGGGGAG-----mirR 22 327
-----TCGGCTCTGGGTCTGTGGGGGA-----mirR 21 240
-----CGGCTCTGGGTCTGTGGGG-----mirR 19 234
-----TCGGCTCTGGGTCTGTGGGG-----mirR 20 128
-----TCGGCTCTGGGTCTGTGGGGAGCG-----mirR 24 117
-----TCGGCTCTGGGTCTGTGGGGAGCGA-----mirR 25 91
-----CGGCTCTGGGTCTGTGGGGAGCGAA-----mirR 25 78
-----TCGGCTCTGGGTCTGTGGGG-----mirR 19 62
-----CTCTGGGTCTGTGGGGAGCGA-----mirR 21 58
-----CTCTGGGTCTGTGGGGAGCG-----mirR 20 18
-----CTCTGGGTCTGTGGGGAGC-----mirR 19 17

```

```

-----CTCTGGGTCTGTGGGGAGCGAA----- mirR 22 12
-----CTCTGGGTCTGTGGGGAG----- mirR 18 6
-----GCTCTGGGTCTGTGGGA----- mirR 18 5
-----GGCTCTGGGTCTGTGGGGAGC----- mirR 21 5
-----GCTCTGGGTCTGTGGGGAG----- mirR 19 5
-----TTCGGCTCTGGGTCTGTGGGGAG----- mirR 23 4
-----CTCTGGGTCTGTGGGGAGCGAAAT----- mirR 24 4
-----GGCTCTGGGTCTGTGGGGAG----- mirR 20 3
-----TTCGGCTCTGGGTCTGTGGGGAGC----- mirR 24 2
-----GGCTCTGGGTCTGTGGGA----- mirR 19 2
-----ATTCGGCTCTGGGTCTGTGGGGAG----- mirR 24 2
-----TTCGGCTCTGGGTCTGTG----- mirR 18 1
-----TTCGGCTCTGGGTCTGTGGGA----- mirR 22 1
-----GCTCTGGGTCTGTGGGGAGCG----- mirR 21 1
-----CTCTGGGTCTGTGGGGAGCGAAA----- mirR 23 1
-----GGCTCTGGGTCTGTGGGG----- mirR 18 1
-----GCTCTGGGTCTGTGGGGAGC----- mirR 20 1
-----ATTCGGCTCTGGGTCTGTGGGA----- mirR 23 1
-----GCTCTGGGTCTGTGGGGAGCGA----- mirR 22 1
-----CGAAATGCAACCCAAACCCCGT--- morR 22 11
-----CGAAATGCAACCCAAACCC----- morR 19 10
-----CGAAATGCAACCCAAACCC----- morR 20 10
-----CGAAATGCAACCCAAACCCG--- morR 21 8
-----CGAAATGCAACCCAAACCCGTTTC morR 25 5
-----CGAAATGCAACCCAAACCC----- morR 18 5
-----GCGAAATGCAACCCAAAC----- morR 18 2
-----CGAAATGCAACCCAAACCCGTTT- morR 24 2
-----GCGAAATGCAACCCAAAC----- morR 19 1
-----AGCGAAATGCAACCCAAAC----- morR 19 1

```

>mmu-mir-142

```

CAGACAGACAGTGCAGTCAACCATAAAGTAGAAAGCACTACTAACAGCACTGGAGGGTGTAGTGTTCCTACTTTATGGATGAGTGCAGTGTGGGCTTCGG species len reads
CAGACAGACAGTGCAGTC----- morL 18 1
-AGACAGACAGTGCAGTCAC----- morL 19 1
-AGACAGACAGTGCAGTCA----- morL 18 1
--GACAGACAGTGCAGTCAC----- morL 18 1
-AGACAGACAGTGCAGTCACCC----- morL 21 1
-----CCATAAAGTAGAAAGCACTAC----- mirL 22 1273
-----CCATAAAGTAGAAAGCACT----- mirL 20 1034
-----CCATAAAGTAGAAAGCACTA----- mirL 21 663
-----CATAAAGTAGAAAGCACTAC----- mirL 20 507
-----CCATAAAGTAGAAAGCAC----- mirL 19 314
-----ACCCATAAAGTAGAAAGCACTA----- mirL 22 310
-----CATAAAGTAGAAAGCACTA----- mirL 19 194
-----ACCCATAAAGTAGAAAGCACTAC----- mirL 23 134
-----CATAAAGTAGAAAGCACTACT----- mirL 21 102

```

```

-----CATAAAGTAGAAAGCACTACTA----- mirL 22 92
-----CCATAAAGTAGAAAGCACTACT----- mirL 23 86
-----ATAAAGTAGAAAGCACTA----- mirL 18 74
-----CATAAAGTAGAAAGCACT----- mirL 18 73
-----CCATAAAGTAGAAAGCA----- mirL 18 50
-----ACCCATAAAGTAGAAAGCAC----- mirL 20 37
-----ACCCATAAAGTAGAAAGCACT----- mirL 21 30
-----CATAAAGTAGAAAGCACTACTAA----- mirL 23 23
-----CCATAAAGTAGAAAGCACTACTA----- mirL 24 11
-----ATAAAGTAGAAAGCACTACTAC----- mirL 19 9
-----ACCCATAAAGTAGAAAGCA----- mirL 19 8
-----CATAAAGTAGAAAGCACTACTACTAAC----- mirL 24 7
-----ATAAAGTAGAAAGCACTACT----- mirL 20 6
-----ATAAAGTAGAAAGCACTACTACTAAC----- mirL 23 2
-----ATAAAGTAGAAAGCACTACTACTAA----- mirL 22 2
-----CCATAAAGTAGAAAGCACTACTAC----- mirL 21 2
-----ATAAAGTAGAAAGCACTACTACTA----- mirL 21 2
-----ACCCATAAAGTAGAAAGCACTACT----- mirL 24 2
-----CCATAAAGTAGAAAGCAC----- mirL 18 1
-----ACCCATAAAGTAGAAAGC----- mirL 18 1
-----CACCCATAAAGTAGAAAGCACTACTAC----- mirL 24 1
-----ATAAAGTAGAAAGCACTACTACTAACA----- mirL 24 1
-----CCATAAAGTAGAAAGCACT----- mirL 19 1
-----TAACAGCACTGGAGGGTG----- loop 18 2
-----TGTAGTGTTTCCTACTTTATGG----- mirR 22 129
-----AGTGTTTCCTACTTTATGGATGA----- mirR 23 123
-----TGTAGTGTTTCCTACTTTATGGA----- mirR 23 111
-----GTAGTGTTTCCTACTTTATGGA----- mirR 22 73
-----TGTAGTGTTTCCTACTTTATG----- mirR 21 64
-----GTAGTGTTTCCTACTTTATGG----- mirR 21 29
-----AGTGTTTCCTACTTTATGGATG----- mirR 22 24
-----TGTAGTGTTTCCTACTTTATGGAT----- mirR 24 21
-----GTAGTGTTTCCTACTTTATGGAT----- mirR 23 21
-----AGTGTTTCCTACTTTATGGAT----- mirR 21 19
-----TGTAGTGTTTCCTACTTTAT----- mirR 20 15
-----AGTGTTTCCTACTTTATGGATGAG----- mirR 24 14
-----TGTAGTGTTTCCTACTTT----- mirR 18 14
-----TGTAGTGTTTCCTACTTTA----- mirR 19 13
-----GTAGTGTTTCCTACTTTA----- mirR 18 11
-----GTAGTGTTTCCTACTTTATG----- mirR 20 10
-----GTAGTGTTTCCTACTTTAT----- mirR 19 10
-----GTAGTGTTTCCTACTTTATGGATG----- mirR 24 8
-----AGTGTTTCCTACTTTATGG----- mirR 19 6
-----TAGTGTTTCCTACTTTATGGA----- mirR 21 6
-----TAGTGTTTCCTACTTTATGG----- mirR 20 5
-----AGTGTTTCCTACTTTATGGA----- mirR 20 5

```

```

-----TAGTGTTTCCTACTTTATGGAT----- mirR 22 4
-----AGTGTTTCCTACTTTATG----- mirR 18 3
-----TAGTGTTTCCTACTTTATGGATGA----- mirR 24 2
-----TAGTGTTTCCTACTTTAT----- mirR 18 2
-----TAGTGTTTCCTACTTTATG----- mirR 19 1
-----GGTGTAGTGTTTCCTACTTTAT----- mirR 22 1
-----GGATGAGTGCCTGTGGG----- morR 18 1
-----TGAGTGCCTGTGGGCTTC-- morR 19 1
-----AGTGCCTGTGGGCTTCGG morR 19 1

```

>mmu-mir-742

| CTCTACTCACATGGTTGCTAATCACGTGAAGTGTAGGTGAAAGCCACCATGCTGGGTAAAGTAAAGC | species | len  | reads |
|---------------------------------------------------------------------|---------|------|-------|
| ---TACTCACATGGTTGCTAA-----                                          | mirL 18 | 253  |       |
| ---TACTCACATGGTTGCTAAT-----                                         | mirL 19 | 163  |       |
| ---TACTCACATGGTTGCTAATCA-----                                       | mirL 21 | 38   |       |
| ---TACTCACATGGTTGCTAATC-----                                        | mirL 20 | 18   |       |
| ----TCACATGGTTGCTAATCA-----                                         | mirL 18 | 9    |       |
| ----CTCACATGGTTGCTAATCA-----                                        | mirL 19 | 8    |       |
| ----ACTCACATGGTTGCTAATCA-----                                       | mirL 20 | 3    |       |
| ----ACTCACATGGTTGCTAAT-----                                         | mirL 18 | 3    |       |
| ---TACTCACATGGTTGCTAATCAG-----                                      | mirL 23 | 2    |       |
| --CTACTCACATGGTTGCTAA-----                                          | mirL 19 | 1    |       |
| ----CTCACATGGTTGCTAATCAC-----                                       | mirL 20 | 1    |       |
| ----ACTCACATGGTTGCTAATCAC-----                                      | mirL 21 | 1    |       |
| CTCTACTCACATGGTTGCT-----                                            | mirL 19 | 1    |       |
| -----AATCACGTGAAGTGTAGGT-----                                       | loop 19 | 97   |       |
| -----AATCACGTGAAGTGTAGGTGAA-----                                    | loop 22 | 19   |       |
| -----AATCACGTGAAGTGTAGGT-----                                       | loop 18 | 17   |       |
| -----AATCACGTGAAGTGTAGGTGA-----                                     | loop 21 | 7    |       |
| -----ATCACGTGAAGTGTAGGTGAA-----                                     | loop 21 | 6    |       |
| -----AATCACGTGAAGTGTAGGTG-----                                      | loop 20 | 5    |       |
| -----ATCACGTGAAGTGTAGGT-----                                        | loop 18 | 4    |       |
| -----CACGTGAAGTGTAGGTGAA-----                                       | loop 19 | 3    |       |
| -----ATCACGTGAAGTGTAGGTGA-----                                      | loop 20 | 1    |       |
| -----ACGTGAAGTGTAGGTGAA-----                                        | loop 18 | 1    |       |
| -----TCACGTGAAGTGTAGGTGA-----                                       | loop 19 | 1    |       |
| -----GAAAGCCACCATGCTGGGTAA-----                                     | mirR 21 | 2695 |       |
| -----GAAAGCCACCATGCTGGGTAAA-----                                    | mirR 22 | 1680 |       |
| -----GAAAGCCACCATGCTGGGTAA-----                                     | mirR 20 | 241  |       |
| -----GAAAGCCACCATGCTGGGTAAAG-----                                   | mirR 23 | 223  |       |
| -----GAAAGCCACCATGCTGGGT-----                                       | mirR 19 | 58   |       |
| -----AGCCACCATGCTGGGTAA-----                                        | mirR 18 | 47   |       |
| -----AAGCCACCATGCTGGGTAAA-----                                      | mirR 20 | 38   |       |
| -----AAGCCACCATGCTGGGTAA-----                                       | mirR 19 | 29   |       |
| -----GAAAGCCACCATGCTGGGT-----                                       | mirR 18 | 27   |       |
| -----AGCCACCATGCTGGGTAAA-----                                       | mirR 19 | 25   |       |

```

-----AAAGCCACCATGCTGGGTAA----- mirR 20 15
-----GAAAGCCACCATGCTGGGTAAAGT----- mirR 24 12
-----AAAGCCACCATGCTGGGTAAA----- mirR 21 12
-----AGCCACCATGCTGGGTAAAG----- mirR 20 5
-----AAGCCACCATGCTGGGTAA----- mirR 18 5
-----AAAGCCACCATGCTGGGTAA----- mirR 19 4
-----TGAAAGCCACCATGCTGGGTAA----- mirR 22 3
-----TGAAAGCCACCATGCTGGGTAAA----- mirR 23 2
-----AAGCCACCATGCTGGGTAAAG----- mirR 21 2
-----GTGAAAGCCACCATGCTG----- mirR 18 1
-----GTGAAAGCCACCATGCTGGGTAA----- mirR 23 1
-----AAAGCCACCATGCTGGGTAAAG----- mirR 22 1
-----AGCCACCATGCTGGGTAAAGTAA----- mirR 23 1
-----GGTGAAAGCCACCATGCT----- mirR 18 1
-----AGCCACCATGCTGGGTAAAGTAAAGC mirR 26 1

```

>mmu-mir-199a-1

| ACTGAACAGCCATCCCCGCATCCCAGTGTTCAGACTACCTGTTTCAGGAGGCTGGGACATGTACAGTAGTCTGCACATTGGTTAGGCTGGGCTTGGGCCAGCAGCAACAGTGGGAACCTCC | species | len | reads |
|---------------------------------------------------------------------------------------------------------------------------|---------|-----|-------|
| ACTGAACAGCCATCCCCGC                                                                                                       | morL    | 19  | 1     |
| -----CCCAGTGTTCAGACTACCTGTT-----                                                                                          | mirL    | 23  | 1917  |
| -----CCCAGTGTTCAGACTACCTGT-----                                                                                           | mirL    | 21  | 1877  |
| -----CCCAGTGTTCAGACTACCTG-----                                                                                            | mirL    | 20  | 581   |
| -----CCCAGTGTTCAGACTACCTGTT-----                                                                                          | mirL    | 22  | 515   |
| -----CCCAGTGTTCAGACTACC-----                                                                                              | mirL    | 18  | 292   |
| -----CCCAGTGTTCAGACTACCT-----                                                                                             | mirL    | 19  | 281   |
| -----CCCAGTGTTCAGACTACCTGTCA-----                                                                                         | mirL    | 24  | 95    |
| -----AGTGTTTCAGACTACCTGTT-----                                                                                            | mirL    | 20  | 29    |
| -----CAGTGTTTCAGACTACCTGT-----                                                                                            | mirL    | 19  | 14    |
| -----CAGTGTTTCAGACTACCTG-----                                                                                             | mirL    | 18  | 14    |
| -----CCAGTGTTTCAGACTACCTGT-----                                                                                           | mirL    | 20  | 9     |
| -----AGTGTTTCAGACTACCTGTT-----                                                                                            | mirL    | 19  | 7     |
| -----AGTGTTTCAGACTACCTGT-----                                                                                             | mirL    | 18  | 7     |
| -----CAGTGTTTCAGACTACCTGTT-----                                                                                           | mirL    | 20  | 6     |
| -----CCAGTGTTTCAGACTACCT-----                                                                                             | mirL    | 18  | 6     |
| -----CCAGTGTTTCAGACTACCTG-----                                                                                            | mirL    | 19  | 5     |
| -----CCAGTGTTTCAGACTACCTGTT-----                                                                                          | mirL    | 22  | 4     |
| -----AGTGTTTCAGACTACCTGTCA-----                                                                                           | mirL    | 21  | 3     |
| -----ATCCCAGTGTTTCAGACTACCTGT-----                                                                                        | mirL    | 23  | 2     |
| -----TCCCAGTGTTTCAGACTAC-----                                                                                             | mirL    | 18  | 2     |
| -----CATCCCAGTGTTTCAGACTACCTGT-----                                                                                       | mirL    | 24  | 2     |
| -----CCAGTGTTTCAGACTACCTGTT-----                                                                                          | mirL    | 21  | 2     |
| -----TCCCAGTGTTTCAGACTACCTGTT-----                                                                                        | mirL    | 23  | 1     |
| -----TCCCAGTGTTTCAGACTACC-----                                                                                            | mirL    | 19  | 1     |
| -----CAGCAGCAACAGTGGGAAC-----                                                                                             | mirR    | 19  | 20    |
| -----CAGCAGCAACAGTGGGAAC-----                                                                                             | mirR    | 20  | 5     |
| -----GGCCAGCAGCAACAGTGG-----                                                                                              | mirR    | 18  | 4     |

```

-----CAGCAGCAACAGTGGGAACT-- mirR 21 3
-----GCCAGCAGCAACAGTGGG----- mirR 18 3
-----CCAGCAGCAACAGTGGGA----- mirR 18 2
-----CCAGCAGCAACAGTGGGAACT--- mirR 21 1
-----CAGCAGCAACAGTGGGAA----- mirR 18 1
-----GGCCAGCAGCAACAGTGGG----- mirR 19 1
-----CAGCAGCAACAGTGGGAAC TTC- mirR 22 1
-----AGCAGCAACAGTGGGAAC---- mirR 18 1
-----CAGCAGCAACAGTGGGAAC TTC mirR 23 1

```

>mmu-mir-592

|                                                                                                      | species | len | reads |
|------------------------------------------------------------------------------------------------------|---------|-----|-------|
| CCATGATATTATGCCATGACATTGTGTCAATATGCGATGATGTTGTGATGGCACAGCGTCATCACGTGGTGACGCAACATCATGACGTAAGACATCACAT | morL    | 18  | 1     |
| --ATGATATTATGCCATGAC-----                                                                            | morL    | 21  | 1     |
| CCATGATATTATGCCATGACA-----                                                                           | morL    | 20  | 1     |
| -CATGATATTATGCCATGACA-----                                                                           | mirL    | 22  | 1887  |
| -----TTGTGTCAATATGCGATGATGT-----                                                                     | mirL    | 20  | 903   |
| -----ATTGTGTCAATATGCGATGA-----                                                                       | mirL    | 19  | 886   |
| -----TTGTGTCAATATGCGATGA-----                                                                        | mirL    | 23  | 385   |
| -----TTGTGTCAATATGCGATGATGTG-----                                                                    | mirL    | 20  | 215   |
| -----TGTGTCAATATGCGATGATGT-----                                                                      | mirL    | 21  | 172   |
| -----TTGTGTCAATATGCGATGATG-----                                                                      | mirL    | 21  | 160   |
| -----TTGTGTCAATATGCGATG-----                                                                         | mirL    | 18  | 114   |
| -----TGTGTCAATATGCGATGA-----                                                                         | mirL    | 18  | 97    |
| -----ATTGTGTCAATATGCGATGATGT-----                                                                    | mirL    | 23  | 80    |
| -----GTGTCAATATGCGATGATG-----                                                                        | mirL    | 19  | 69    |
| -----GTGTCAATATGCGATGATGT-----                                                                       | mirL    | 20  | 56    |
| -----TGTGTCAATATGCGATGATG-----                                                                       | mirL    | 20  | 46    |
| -----TTGTGTCAATATGCGATGATGTG-----                                                                    | mirL    | 24  | 45    |
| -----ATTGTGTCAATATGCGATGATG-----                                                                     | mirL    | 22  | 43    |
| -----ATTGTGTCAATATGCGATGAT-----                                                                      | mirL    | 21  | 40    |
| -----TGTGTCAATATGCGATGATGTG-----                                                                     | mirL    | 22  | 35    |
| -----ATTGTGTCAATATGCGATG-----                                                                        | mirL    | 19  | 33    |
| -----TGTGTCAATATGCGATGAT-----                                                                        | mirL    | 19  | 28    |
| -----GTGTCAATATGCGATGAT-----                                                                         | mirL    | 18  | 24    |
| -----TGTCAATATGCGATGATG-----                                                                         | mirL    | 18  | 23    |
| -----ATTGTGTCAATATGCGAT-----                                                                         | mirL    | 18  | 19    |
| -----GTGTCAATATGCGATGATGTG-----                                                                      | mirL    | 21  | 7     |
| -----TGTCAATATGCGATGATGT-----                                                                        | mirL    | 19  | 5     |
| -----TGTCAATATGCGATGATGTG-----                                                                       | mirL    | 20  | 4     |
| -----TGTGTCAATATGCGATGATGTG-----                                                                     | mirL    | 23  | 3     |
| -----ATTGTGTCAATATGCGATGATGTG-----                                                                   | mirL    | 24  | 3     |
| -----CATTGTGTCAATATGCGATGA-----                                                                      | mirL    | 21  | 2     |
| -----GTGTCAATATGCGATGATGTG-----                                                                      | mirL    | 22  | 1     |
| -----CATTGTGTCAATATGCGAT-----                                                                        | mirL    | 19  | 1     |
| -----GTGTCAATATGCGATGATGTGTTGT-----                                                                  | mirL    | 25  | 1     |



```

-----TGTGTCAATATGCGATGATGTGTT----- mirL 24 1
-----GTGTTGTGATGGCACAGC----- loop 18 1
-----TCATCACGTGGTGACGCAACAT----- mirR 22 168
-----TCATCACGTGGTGACGCAACATC----- mirR 23 90
-----TCATCACGTGGTGACGCAACA----- mirR 21 26
-----TCATCACGTGGTGACGCAAC----- mirR 20 9
-----CATCACGTGGTGACGCAACAT----- mirR 21 5
-----CATCACGTGGTGACGCAACATC----- mirR 22 3
-----TCATCACGTGGTGACGCAA----- mirR 19 3
-----CATCACGTGGTGACGCAACA----- mirR 20 2
-----TCATCACGTGGTGACGCAACATCA----- mirR 24 2
-----TCACGTGGTGACGCAACA----- mirR 18 1
-----CATCACGTGGTGACGCAAC----- mirR 19 1
-----GTCATCACGTGGTGACGCA----- mirR 19 1
-----ATCACGTGGTGACGCAAC----- mirR 18 1
-----CGTCATCACGTGGTGACG----- mirR 18 1
-----TCATCACGTGGTGACGCA----- mirR 18 1
-----ATGACGTAAGACATCACAT morR 19 1
-----ATCATGACGTAAGACATCACAT morR 22 1
-----ATGACGTAAGACATCACA- morR 18 1

>mmu-mir-199a-2
AGGAGATCCTGCTCCGTCGCCCCAGTGTTTCAGACTACCTGTTTCAGGACAATGCCGTTGTACAGTAGTCTGCACATTGGTTAGACTGGGCAAGGGCCAGCAAC species len reads
-----ATCCTGCTCCGTCGCCCC----- morL 18 6
-----AGATCCTGCTCCGTCGCCCC----- morL 19 1
AGGAGATCCTGCTCCGTCG----- morL 19 1
-----CCCAGTGTTTCAGACTACCTGTTTC----- mirL 23 1917
-----CCCAGTGTTTCAGACTACCTGT----- mirL 21 1877
-----CCCAGTGTTTCAGACTACCTG----- mirL 20 581
-----CCCAGTGTTTCAGACTACCTGTT----- mirL 22 515
-----CCCAGTGTTTCAGACTACC----- mirL 18 292
-----CCCAGTGTTTCAGACTACCT----- mirL 19 281
-----CCCAGTGTTTCAGACTACCTGTTCA----- mirL 24 95
-----AGTGTTTCAGACTACCTGTTTC----- mirL 20 29
-----CAGTGTTTCAGACTACCTGT----- mirL 19 14
-----CAGTGTTTCAGACTACCTG----- mirL 18 14
-----CCAGTGTTTCAGACTACCTGT----- mirL 20 9
-----AGTGTTTCAGACTACCTGTT----- mirL 19 7
-----AGTGTTTCAGACTACCTGT----- mirL 18 7
-----CAGTGTTTCAGACTACCTGTT----- mirL 20 6
-----CCAGTGTTTCAGACTACCT----- mirL 18 6
-----CCAGTGTTTCAGACTACCTG----- mirL 19 5
-----CCAGTGTTTCAGACTACCTGTTTC----- mirL 22 4
-----CCCCAGTGTTTCAGACTACCTGT----- mirL 22 3
-----AGTGTTTCAGACTACCTGTTCA----- mirL 21 3
-----CCAGTGTTTCAGACTACCTGTT----- mirL 21 2

```

```

-----CCCCAGTGTTCAGACTACCTGTTT----- mirL 24 2
-----CCCCAGTGTTCAGACTAC----- mirL 18 1
-----TTCAGGACAATGCCGTTGTA----- loop 20 1
-----CAGGACAATGCCGTTGTA----- loop 18 1
-----TCAGGACAATGCCGTTGT----- loop 18 1
-----ACAGTAGTCTGCACATTGGTTAGAC----- mirR 25 8
-----ACAGTAGTCTGCACATTGGTTAGA----- mirR 24 7
-----ACAGTAGTCTGCACATTGGTTAGACT----- mirR 26 2
-----TACAGTAGTCTGCACATTGGTTAGAC----- mirR 26 1
-----CAGTAGTCTGCACATTGGTTAGAC----- mirR 24 1
-----ACTGGGCAAGGGCCAGCAAC morR 20 1

```

>mmu-mir-1946a

```

AATAACTTAAAGAAATCTATAGCCGGGCAGTGGTGGCACACACTTTTAATCCCAACACTTGTGAGGCACAGGCAGGTGGATTTCTGATCAAAGGCATGCGCCACCCTCTCGGCTTTCTCCTCTCCTTTT species 1
-ATAACTTAAAGAAATCTATA----- morL 20 2
AATAACTTAAAGAAATCT----- morL 18 1
-----CTTAAAGAAATCTATAGC----- morL 18 1
-----AGCCGGGCAGTGGTGGCACACACTTTT----- mirL 27 30
-----AGCCGGGCAGTGGTGGCACACACTTT----- mirL 26 13
-----AGCCGGGCAGTGGTGGCACACACTT----- mirL 25 33
-----AGCCGGGCAGTGGTGGCACACACTTTTA----- mirL 28 26
-----AGCCGGGCAGTGGTGGCACACACT----- mirL 24 13
-----AGCCGGGCAGTGGTGGCACAC----- mirL 21 10
-----AGCCGGGCAGTGGTGGCACACA----- mirL 20 78
-----GCCGGGCAGTGGTGGCACACACTTTT----- mirL 26 54
-----GCCGGGCAGTGGTGGCACACACTTT----- mirL 25 28
-----GCCGGGCAGTGGTGGCACAC----- mirL 20 23
-----CCGGGCAGTGGTGGCACACACTTTT----- mirL 25 16
-----CCGGGCAGTGGTGGCACACACTTT----- mirL 24 12
-----GCCGGGCAGTGGTGGCACACACTT----- mirL 24 8
-----TAGCCGGGCAGTGGTGGCACACACTTTT----- mirL 28 8
-----GCCGGGCAGTGGTGGCACACA----- mirL 21 6
-----CGGGCAGTGGTGGCACACACTTTT----- mirL 24 6
-----GCCGGGCAGTGGTGGCACACAC----- mirL 22 5
-----TAGCCGGGCAGTGGTGGCACACACTTT----- mirL 27 4
-----CCGGGCAGTGGTGGCACACACTT----- mirL 23 3
-----GCCGGGCAGTGGTGGCACACACT----- mirL 23 3
-----CGGGCAGTGGTGGCACACACTTT----- mirL 23 2
-----CCGGGCAGTGGTGGCACACAC----- mirL 21 2
-----CGGGCAGTGGTGGCACACACTT----- mirL 22 2
-----CCGGGCAGTGGTGGCACAC----- mirL 19 1
-----TAGCCGGGCAGTGGTGGCACAC----- mirL 22 1
-----CCGGGCAGTGGTGGCACACACTTTTAAT----- mirL 28 1
-----ATAGCCGGGCAGTGGTGGCACACACTTT----- mirL 28 1
-----CGGGCAGTGGTGGCACACACTTTTAA----- mirL 26 1
-----TAGCCGGGCAGTGGTGGCACACAC----- mirL 24 1

```

```

-----ATAGCCGGGCAGTGGTGGCACA----- mirL 22 1
-----AAAGGCATGCGCCACCAC----- mirR 18 23
-----AAAGGCATGCGCCACCACT----- mirR 19 18
-----AAAGGCATGCGCCACCACTCT----- mirR 21 15
-----ATCAAAGGCATGCGCCACCAC----- mirR 21 9
-----ATCAAAGGCATGCGCCACCA----- mirR 20 9
-----AAGGCATGCGCCACCACTCT----- mirR 20 4
-----CAAAGGCATGCGCCACCA----- mirR 18 4
-----TCAAAGGCATGCGCCACCA----- mirR 19 4
-----GGCATGCGCCACCACTCT----- mirR 18 3
-----AAAGGCATGCGCCACCACTC----- mirR 20 3
-----TCAAAGGCATGCGCCACCACT----- mirR 21 3
-----AAAGGCATGCGCCACCACTCTC----- mirR 22 2
-----TCAAAGGCATGCGCCACCAC----- mirR 20 2
-----AAGGCATGCGCCACCACT----- mirR 18 2
-----CAAAGGCATGCGCCACCAC----- mirR 19 1
-----AAGGCATGCGCCACCACTC----- mirR 19 1
-----TCAAAGGCATGCGCCACC----- mirR 18 1
-----AAAGGCATGCGCCACCACTCTCG----- mirR 23 1
-----ATCAAAGGCATGCGCCACCACTC----- mirR 23 1
-----ATCAAAGGCATGCGCCACCACTCT----- mirR 24 1
-----CTCGGCTTTCTCCTCTCC----- morR 18 3
-----CACTCTCGGCTTTCTCCTC----- morR 19 2
-----CGGCTTTCTCCTCTCCTTTT----- morR 20 2
-----CACTCTCGGCTTTCTCCT----- morR 18 2
-----ACTCTCGGCTTTCTCCTC----- morR 18 1
-----CACTCTCGGCTTTCTCCTCT----- morR 20 1
-----CTCTCGGCTTTCTCCTCTCC----- morR 20 1
-----TCGGCTTTCTCCTCTCCTT----- morR 19 1

```

>mmu-mir-878

```

AAGAGTGTGTGTGCAATGCTTTATCTAGTTGGATGTCAAGACACGTGAAACTTAAGTGCATGACACCACACTGGGTAGAGGAGGGCTCACAGTGTTC species len reads
--GAGTGTGTGTGCAATGCTTTA----- morL 22 1
AAGAGTGTGTGTGCAATG----- morL 19 1
-----TATCTAGTTGGATGTCAAGACA----- mirL 22 129
-----TATCTAGTTGGATGTCAAGAC----- mirL 21 48
-----TATCTAGTTGGATGTCAAGACAC----- mirL 23 42
-----TATCTAGTTGGATGTCAAG----- mirL 19 37
-----TATCTAGTTGGATGTCAA----- mirL 18 18
-----TATCTAGTTGGATGTCAAGA----- mirL 20 16
-----ATCTAGTTGGATGTCAAGACA----- mirL 21 15
-----TATCTAGTTGGATGTCAAGACACG----- mirL 24 7
-----ATCTAGTTGGATGTCAAGACAC----- mirL 22 5
-----CTAGTTGGATGTCAAGACA----- mirL 19 4
-----ATCTAGTTGGATGTCAAGAC----- mirL 20 4
-----ATCTAGTTGGATGTCAAG----- mirL 18 4

```

```

-----ATCTAGTTGGATGTCAAGA----- mirL 19 4
-----CTAGTTGGATGTCAAGACAC----- mirL 20 3
-----CTAGTTGGATGTCAAGAC----- mirL 18 3
-----TCTAGTTGGATGTCAAGACAG----- mirL 22 2
-----TCTAGTTGGATGTCAAGAC----- mirL 19 1
-----ACGTGAAACTTAAGTGCA----- loop 18 1
-----GCATGACACCACACTGGGTAG----- mirR 21 2836
-----GCATGACACCACACTGGGTAGA----- mirR 22 1203
-----GCATGACACCACACTGGGTA----- mirR 20 429
-----GCATGACACCACACTGGGTAGAG----- mirR 23 290
-----GCATGACACCACACTGGGT----- mirR 19 187
-----GCATGACACCACACTGGG----- mirR 18 89
-----ATGACACCACACTGGGTAG----- mirR 19 46
-----TGACACCACACTGGGTAGA----- mirR 19 40
-----ATGACACCACACTGGGTAGA----- mirR 20 36
-----CATGACACCACACTGGGTAG----- mirR 20 32
-----TGACACCACACTGGGTAG----- mirR 18 28
-----CATGACACCACACTGGGTAGA----- mirR 21 23
-----ATGACACCACACTGGGTAGAG----- mirR 21 6
-----CATGACACCACACTGGGTAGAG----- mirR 22 5
-----TGCATGACACCACACTGGGT----- mirR 20 3
-----CATGACACCACACTGGGT----- mirR 18 3
-----GCATGACACCACACTGGGTAGAG----- mirR 24 3
-----AGTGCATGACACCACACTG----- mirR 19 3
-----ATGACACCACACTGGGTA----- mirR 18 3
-----TGACACCACACTGGGTAGAG----- mirR 20 2
-----AGTGCATGACACCACACTGG----- mirR 20 1
-----TGCATGACACCACACTGGGTAG----- mirR 22 1
-----TGCATGACACCACACTGGGTAGA----- mirR 23 1
-----TGCATGACACCACACTGGGTA----- mirR 21 1
-----AGTGCATGACACCACACT----- mirR 18 1
-----GAGGGCTCACAGTGTTC morR 18 1

```

>mmu-mir-452

```

CAACTGTTTGCAGAGGAAACTGAGACTTTATAACTATGTCTCAGTCTCATCTGCAAAGAGGTAAGTGCTTTGCCAAGCCCCTT species len reads
- AACTGTTTGCAGAGGAAACTGA----- mirL 22 961
- AACTGTTTGCAGAGGAAACTG----- mirL 21 700
  TGTTCAGAGGAAACTGAGAC----- mirL 22 473
  TGTTCAGAGGAAACTGAGA----- mirL 21 175
- AACTGTTTGCAGAGGAAACTGAG----- mirL 23 144
- AACTGTTTGCAGAGGAAA----- mirL 18 115
- AACTGTTTGCAGAGGAAACT----- mirL 20 114
  TGTTCAGAGGAAACTGAGACT----- mirL 23 106
- AACTGTTTGCAGAGGAAAC----- mirL 19 88
  TGTTCAGAGGAAACTGAG----- mirL 20 80
  TGTTCAGAGGAAACTGA----- mirL 19 77

```

```

--ACTGTTTGCAGAGGAAACTGA----- mirL 21 18
--AACTGTTTGCAGAGGAAACTGAGA----- mirL 24 17
--ACTGTTTGCAGAGGAAACTG----- mirL 20 17
---TGTTTGCAGAGGAAACTG----- mirL 18 8
--ACTGTTTGCAGAGGAAACTGAG----- mirL 22 7
---TGTTTGCAGAGGAAACTGAGACTT----- mirL 24 5
--ACTGTTTGCAGAGGAAACT----- mirL 19 4
---CTGTTTGCAGAGGAAACTGA----- mirL 20 4
---CTGTTTGCAGAGGAAACTGAGAC----- mirL 23 3
---CTGTTTGCAGAGGAAACTGAGA----- mirL 22 2
CAACTGTTTGCAGAGGAAACTGA----- mirL 23 1
---CTGTTTGCAGAGGAAACTGAG----- mirL 21 1
--ACTGTTTGCAGAGGAAAC----- mirL 18 1
CAACTGTTTGCAGAGGAAA----- mirL 19 1
---CTGTTTGCAGAGGAAACT----- mirL 18 1
---CTGTTTGCAGAGGAAACTG----- mirL 19 1
---CTGTTTGCAGAGGAAACTGAGACT----- mirL 24 1
-----CTCATCTGCAAAGAGGTAAG----- mirR 20 1888
-----CTCATCTGCAAAGAGGTAA----- mirR 19 312
-----CTCATCTGCAAAGAGGTAAGT----- mirR 21 141
-----CTCATCTGCAAAGAGGTAAGTG----- mirR 22 41
-----CTCATCTGCAAAGAGGTA----- mirR 18 16
-----CATCTGCAAAGAGGTAAG----- mirR 18 10
-----ATCTGCAAAGAGGTAAGTG----- mirR 19 6
-----TCATCTGCAAAGAGGTAAG----- mirR 19 5
-----CATCTGCAAAGAGGTAAGT----- mirR 19 5
-----GTCTCATCTGCAAAGAGGT----- mirR 19 4
-----TCATCTGCAAAGAGGTAAGTG----- mirR 21 3
-----GTCTCATCTGCAAAGAGG----- mirR 18 3
-----ATCTGCAAAGAGGTAAGT----- mirR 18 2
-----CTCATCTGCAAAGAGGTAAGTGC----- mirR 23 2
-----AGTCTCATCTGCAAAGAGG----- mirR 19 2
-----AGTCTCATCTGCAAAGAGGTA----- mirR 21 1
-----AGTCTCATCTGCAAAGAG----- mirR 18 1
-----GTGCTTTGCCAAGCCCCTT morR 19 1

```

>mmu-mir-429

```

CCTGCTGATGGATGTCTTACCAGACATGGTTAGATCTGGATGCATCTGTCTAATACTGTCTGGTAATGCCGTCCA species len reads
-----GATGGATGTCTTACCAGA----- morL 18 1
CCTGCTGATGGATGTCTTACC----- morL 21 1
---CTGATGGATGTCTTACCA----- morL 18 1
---GCTGATGGATGTCTTACC----- morL 18 1
--TGCTGATGGATGTCTTAC----- morL 18 1
-----AGACATGGTTAGATCTGG----- mirL 18 2
-----TAATACTGTCTGGTAATGCCGT--- mirR 22 1909
-----TAATACTGTCTGGTAATGCCG--- mirR 21 1448

```

```

-----TAATACTGTCTGGTAATGCCGTC-- mirR 23 677
-----AATACTGTCTGGTAATGCCGT--- mirR 21 352
-----TAATACTGTCTGGTAATGC----- mirR 19 267
-----AATACTGTCTGGTAATGCCG--- mirR 20 250
-----TAATACTGTCTGGTAATGCC----- mirR 20 168
-----TAATACTGTCTGGTAATGCCGTCC- mirR 24 166
-----AATACTGTCTGGTAATGCCGTC-- mirR 22 78
-----ATACTGTCTGGTAATGCCGT--- mirR 20 41
-----AATACTGTCTGGTAATGC----- mirR 18 31
-----TAATACTGTCTGGTAATGCCGTCCA mirR 25 26
-----AATACTGTCTGGTAATGCCGTCC- mirR 23 26
-----TACTGTCTGGTAATGCCGT--- mirR 19 23
-----ATACTGTCTGGTAATGCCG--- mirR 19 16
-----AATACTGTCTGGTAATGCC----- mirR 19 13
-----CTAATACTGTCTGGTAATGCCG--- mirR 22 8
-----AATACTGTCTGGTAATGCCGTCCA mirR 24 7
-----TACTGTCTGGTAATGCCG--- mirR 18 4
-----ATACTGTCTGGTAATGCCGTCC-- mirR 21 3
-----ATACTGTCTGGTAATGCC----- mirR 18 3
-----ATACTGTCTGGTAATGCCGTCCA mirR 23 2
-----CTAATACTGTCTGGTAATGCCGT--- mirR 23 2
-----CTAATACTGTCTGGTAATGC----- mirR 20 2

```

>mmu-mir-3085

```

ACAGTCCCAACTCTGGGAAGGTGCCATTCCGAGGGCCAAGAGTCTGAATATGAGTCACTCTGGCTGCTATGGCCCCCTCCAGGGCTTGGGCATCAC species len reads
-CAGTCCCAACTCTGGGAAG----- morL 19 1
ACAGTCCCAACTCTGGGAAG----- morL 20 1
-----AGGTGCCATTCCGAGGGCCAAGAG----- mirL 24 42
-----AGGTGCCATTCCGAGGGCCAAGAGT----- mirL 25 41
-----AGGTGCCATTCCGAGGGCCAAGA----- mirL 23 22
-----AGGTGCCATTCCGAGGGCCAAG----- mirL 22 14
-----AGGTGCCATTCCGAGGGCC----- mirL 19 12
-----AGGTGCCATTCCGAGGGCCAAGAGTC----- mirL 26 12
-----AGGTGCCATTCCGAGGGC----- mirL 18 11
-----AAGGTGCCATTCCGAGGGCCAAGAG----- mirL 25 4
-----AAGGTGCCATTCCGAGGGCCAAGAGT----- mirL 26 4
-----AAGGTGCCATTCCGAGGGCCAA----- mirL 22 2
-----AAGGTGCCATTCCGAGGG----- mirL 18 2
-----AAGGTGCCATTCCGAGGGCC----- mirL 20 2
-----TGCCATTCCGAGGGCCAAG----- mirL 19 2
-----AAGGTGCCATTCCGAGGGC----- mirL 19 1
-----AAGGTGCCATTCCGAGGGCCAAG----- mirL 23 1
-----TCTGAATATGAGTCACTC----- loop 18 5
-----TCTGGCTGCTATGGCCCCCTCC----- mirR 22 2246
-----TCTGGCTGCTATGGCCCCCTC----- mirR 21 1293
-----TCTGGCTGCTATGGCCCCCTCC----- mirR 23 735

```

```

-----TCTGGCTGCTATGGCCCCCT----- mirR 20 326
-----TCTGGCTGCTATGGCCCCC----- mirR 19 214
-----TCTGGCTGCTATGGCCCC----- mirR 18 145
-----CTGGCTGCTATGGCCCCCTCC----- mirR 21 140
-----TCTGGCTGCTATGGCCCCCTCCA----- mirR 24 114
-----CTGGCTGCTATGGCCCCCTCCC----- mirR 22 35
-----CTGGCTGCTATGGCCCCCTC----- mirR 20 23
-----CTCTGGCTGCTATGGCCCCCTCC----- mirR 23 14
-----CTGGCTGCTATGGCCCCCT----- mirR 19 8
-----CTGGCTGCTATGGCCCC----- mirR 18 5
-----CTGGCTGCTATGGCCCCCTCCA----- mirR 23 5
-----CTGGCTGCTATGGCCCCCTCCCAG----- mirR 24 3
-----CTCTGGCTGCTATGGCCCCCTC----- mirR 22 2
-----CTCTGGCTGCTATGGCCCCCTCCC----- mirR 24 2
-----CTCTGGCTGCTATGGCCCC----- mirR 19 2
-----CTCTGGCTGCTATGGCCCC----- mirR 20 2
-----CACTCTGGCTGCTATGGCCCC----- mirR 22 2
-----ACTCTGGCTGCTATGGCCC----- mirR 19 1
-----CACTCTGGCTGCTATGGC----- mirR 18 1
-----CCAGGGCTTGGGCATCAC morR 18 1

```

>mmu-mir-1191

```

AGCCAGCCAGGGCTACATAGTGAGAACCTGCCTCAAAAGCAAAACAGCAGTCTTACTATGTAGCCCTAGATGGCCTAGAACTCCCTAT species len reads
-GCCAGCCAGGGCTACATA----- morL 18 2
AGCCAGCCAGGGCTACATAGTGA----- morL 23 1
-----GCCAGGGCTACATAGTGA----- morL 18 1
-----TGAGAACCTGCCTCAAAAG----- mirL 19 8
-----GAGAACCTGCCTCAAAAG----- mirL 18 1
-----CAGTCTTACTATGTAGCCCTA----- mirR 21 3206
-----CAGTCTTACTATGTAGCCCTAG----- mirR 22 1431
-----CAGTCTTACTATGTAGCCCT----- mirR 20 219
-----AGTCTTACTATGTAGCCCTAG----- mirR 21 209
-----CAGTCTTACTATGTAGCCC----- mirR 19 139
-----AGTCTTACTATGTAGCCCTA----- mirR 20 60
-----CAGTCTTACTATGTAGCC----- mirR 18 48
-----CAGTCTTACTATGTAGCCCTAGA----- mirR 23 47
-----AGTCTTACTATGTAGCCCTAGA----- mirR 22 24
-----AGTCTTACTATGTAGCCC----- mirR 18 21
-----AGTCTTACTATGTAGCCCTAGAT----- mirR 23 20
-----CAGTCTTACTATGTAGCCCTAGAT----- mirR 24 12
-----GTCTTACTATGTAGCCCTA----- mirR 19 8
-----AGTCTTACTATGTAGCCCT----- mirR 19 7
-----GCAGTCTTACTATGTAGCCCTAG----- mirR 23 6
-----TCTTACTATGTAGCCCTA----- mirR 18 6
-----GCAGTCTTACTATGTAGCCCTA----- mirR 22 5
-----TCTTACTATGTAGCCCTAG----- mirR 19 2

```

C:\Documents and Settings\hong\Desktop\Hippocampus-total RNA.txt

```
-----GCAGTCTTACTATGTAGCCC----- mirR 20 2
-----AGCAGTCTTACTATGTAGCCCTA----- mirR 23 1
-----AGTCTTACTATGTAGCCCTAGATG----- mirR 24 1
-----TCTTACTATGTAGCCCTAGAT----- mirR 21 1
-----TCTTACTATGTAGCCCTAGATG----- mirR 22 1
-----ATGGCCTAGAACTCCCTA----- morR 18 2
-----TGGCCTAGAACTCCCTAT----- morR 18 1
```

>mmu-mir-539

```
GCTACTGTTTCATACTTGAGGAGAAATTATCCTTGGTGTGTTGGCTCTTTGGATGAATCATACAAGGATAATTTCTTTTGGAGTATCAAATACTGCCCTG species len reads
GCTACTGTTTCATACTTGA----- morL 19 1
-----GGAGAAATTATCCTTGGTGTGT----- mirL 22 2815
-----GGAGAAATTATCCTTGGTGTGTT----- mirL 23 1133
-----GGAGAAATTATCCTTGGTGTG----- mirL 21 522
-----GGAGAAATTATCCTTGGTGT----- mirL 20 344
-----GGAGAAATTATCCTTGGTGTGTT----- mirL 24 273
-----GGAGAAATTATCCTTGGTGT----- mirL 19 133
-----GGAGAAATTATCCTTGGT----- mirL 18 70
-----AGAAATTATCCTTGGTGTGT----- mirL 20 38
-----GAAATTATCCTTGGTGTGT----- mirL 19 34
-----GAGAAATTATCCTTGGTGTGT----- mirL 21 19
-----AGAAATTATCCTTGGTGT----- mirL 18 11
-----GAAATTATCCTTGGTGTG----- mirL 18 10
-----AGAAATTATCCTTGGTGTGTT----- mirL 21 6
-----GAGAAATTATCCTTGGTGTG----- mirL 20 6
-----GAGAAATTATCCTTGGTGT----- mirL 19 4
-----AGGAGAAATTATCCTTGGTGTGT----- mirL 23 4
-----GAAATTATCCTTGGTGTGTT----- mirL 20 4
-----AGAAATTATCCTTGGTGTG----- mirL 19 4
-----GAGAAATTATCCTTGGTGTGTT----- mirL 22 3
-----AGAAATTATCCTTGGTGTGTTGGCTCT----- mirL 27 1
-----GAGAAATTATCCTTGGTGT----- mirL 18 1
-----GAAATTATCCTTGGTGTGTTGGCTCT----- mirL 26 1
-----TGTTGGCTCTTTGGATG----- loop 18 1
-----CATACAAGGATAATTTCTTTT----- mirR 22 8
-----CATACAAGGATAATTTCTTTT----- mirR 21 2
-----ATACAAGGATAATTTCTTTTGA----- mirR 23 2
-----CATACAAGGATAATTTCTTT----- mirR 20 1
-----TACAAGGATAATTTCTTTTGA----- mirR 22 1
-----ATACAAGGATAATTTCTTTTGA----- mirR 24 1
-----ATACAAGGATAATTTCTTTT----- mirR 21 1
-----TGAGTATCAAATACTGCC----- morR 18 1
-----TTGAGTATCAAATACTGCC----- morR 19 1
-----GTATCAAATACTGCCCTG----- morR 18 1
```

>mmu-mir-615



|                                                                                                        | species | len | reads |
|--------------------------------------------------------------------------------------------------------|---------|-----|-------|
| CTCGGGAGGGGCGGGAGGGGGTCCCCGGTGCTCGGATCTCGAGGGTGCTTATTGTTCCGGTCCGAGCCTGGGTCTCCCTCTTCCCCCATCCCCCTCAGCCCC | morL    | 18  | 3     |
| ---GGGAGGGGCGGGAGGGGG---                                                                               | morL    | 18  | 2     |
| -----GAGGGGCGGGAGGGGGT-----                                                                            | morL    | 18  | 1     |
| -----AGGGGCGGGAGGGGGTTC-----                                                                           | morL    | 18  | 1     |
| --CGGGAGGGGCGGGAGGGGG--                                                                                | morL    | 18  | 1     |
| --CGGGAGGGGCGGGAGGGGG--                                                                                | morL    | 20  | 1     |
| --CGGGAGGGGCGGGAGGGGG--                                                                                | morL    | 19  | 1     |
| --GGGAGGGGCGGGAGGGGGT--                                                                                | morL    | 20  | 1     |
| --CGGGAGGGGCGGGAGGGGGT--                                                                               | morL    | 21  | 1     |
| CTCGGGAGGGGCGGGAGGGG                                                                                   | morL    | 19  | 1     |
| -----TCCCCGGTGCTCGGATCT-----                                                                           | mirL    | 18  | 26    |
| -----GTCCCCGGTGCTCGGATC-----                                                                           | mirL    | 18  | 21    |
| -----GGTCCCCGGTGCTCGGATC-----                                                                          | mirL    | 19  | 12    |
| -----GTCCCCGGTGCTCGGATCT-----                                                                          | mirL    | 19  | 8     |
| -----GGTCCCCGGTGCTCGGAT-----                                                                           | mirL    | 18  | 6     |
| -----GGGTCCCCGGTGCTCGGATC-----                                                                         | mirL    | 20  | 6     |
| -----GGTCCCCGGTGCTCGGATCT-----                                                                         | mirL    | 20  | 4     |
| -----GGGTCCCCGGTGCTCGGATCT-----                                                                        | mirL    | 21  | 3     |
| -----TCCCCGGTGCTCGGATCTC-----                                                                          | mirL    | 19  | 3     |
| -----GGGTCCCCGGTGCTCGGA-----                                                                           | mirL    | 18  | 1     |
| -----GGTCCCCGGTGCTCGGATCTC-----                                                                        | mirL    | 21  | 1     |
| -----TCCCCGGTGCTCGGATCTCG-----                                                                         | mirL    | 20  | 1     |
| -----GGGTCCCCGGTGCTCGGAT-----                                                                          | mirL    | 19  | 1     |
| -----AGGGTGCTTATTGTTCCG-----                                                                           | loop    | 18  | 1     |
| -----TCGAGGGTGCTTATTGTT-----                                                                           | loop    | 18  | 1     |
| -----TCCGAGCCTGGGTCTCCCTCTT-----                                                                       | mirR    | 22  | 2523  |
| -----TCCGAGCCTGGGTCTCCCTCT-----                                                                        | mirR    | 21  | 1946  |
| -----TCCGAGCCTGGGTCTCCCTCTTC-----                                                                      | mirR    | 23  | 152   |
| -----TCCGAGCCTGGGTCTCCCTC-----                                                                         | mirR    | 20  | 139   |
| -----CCGAGCCTGGGTCTCCCTCTT-----                                                                        | mirR    | 21  | 125   |
| -----CCGAGCCTGGGTCTCCCTCT-----                                                                         | mirR    | 20  | 119   |
| -----TCCGAGCCTGGGTCTCCCT-----                                                                          | mirR    | 19  | 90    |
| -----CGAGCCTGGGTCTCCCTCT-----                                                                          | mirR    | 19  | 55    |
| -----CGAGCCTGGGTCTCCCTCTT-----                                                                         | mirR    | 20  | 32    |
| -----GAGCCTGGGTCTCCCTCT-----                                                                           | mirR    | 18  | 31    |
| -----TCCGAGCCTGGGTCTCCCTCTTCC-----                                                                     | mirR    | 24  | 28    |
| -----TCCGAGCCTGGGTCTCCCTCTTCCCCC-----                                                                  | mirR    | 28  | 19    |
| -----CCGAGCCTGGGTCTCCCTC-----                                                                          | mirR    | 19  | 9     |
| -----CCGAGCCTGGGTCTCCCT-----                                                                           | mirR    | 18  | 7     |
| -----CGAGCCTGGGTCTCCCTC-----                                                                           | mirR    | 18  | 6     |
| -----GTCCGAGCCTGGGTCTCCCTCTT-----                                                                      | mirR    | 23  | 5     |
| -----GAGCCTGGGTCTCCCTCTT-----                                                                          | mirR    | 19  | 4     |
| -----CCGAGCCTGGGTCTCCCTCTTC-----                                                                       | mirR    | 22  | 4     |
| -----GTCCGAGCCTGGGTCTCCCTCT-----                                                                       | mirR    | 22  | 3     |
| -----CCGAGCCTGGGTCTCCCTCTTCCCCC-----                                                                   | mirR    | 27  | 3     |
| -----CGAGCCTGGGTCTCCCTCTTC-----                                                                        | mirR    | 21  | 1     |

```

-----GGTCCGAGCCTGGGTCTCCCTCT----- mirR 23 1
-----CCGAGCCTGGGTCTCCCTCTTCCCCCA----- mirR 28 1
-----GTCCGAGCCTGGGTCTCC----- mirR 18 1
-----CCCCATCCCCCCTCAGCC-- morR 19 3
-----CTTCCCCCATCCCCCCTC----- morR 19 3
-----CCCCCATCCCCCCTCAG---- morR 18 2
-----CTTCCCCCATCCCCCCT----- morR 18 2
-----TTCCCCCATCCCCCCTC----- morR 18 2
-----CCCCCATCCCCCCTCAGCCC- morR 21 1
-----CCCCATCCCCCCTCAGCC-- morR 18 1
-----CCCCATCCCCCCTCAGCCC- morR 20 1
-----CCCATCCCCCCTCAGCCC- morR 18 1
-----CCCCATCCCCCCTCAGCCCC morR 20 1

```

>mmu-mir-377

| Sequence                                                                                                 | species | len | reads |
|----------------------------------------------------------------------------------------------------------|---------|-----|-------|
| CTGTGCTGACGTTTGATTCTTGAGCAGAGGTTGCCCTTGGTGAATTCGCTTTATGATGTTGAATCACACAAAGGCAACTTTTGTGGTATCAAAGCCTGCTTGGG | mirL    | 24  | 22    |
| -TGTGCTGACGTTTGATTCTTGAGC-----                                                                           | morL    | 24  | 22    |
| -TGTGCTGACGTTTGATTCTTGAGCAG-----                                                                         | morL    | 26  | 6     |
| CTGTGCTGACGTTTGATTCTTGAGC-----                                                                           | morL    | 25  | 6     |
| -TGTGCTGACGTTTGATTCTTGA-----                                                                             | morL    | 22  | 5     |
| -----CTGACGTTTGATTCTTGAGC-----                                                                           | morL    | 20  | 5     |
| -TGTGCTGACGTTTGATTCTTGAG-----                                                                            | morL    | 23  | 4     |
| ---TGCTGACGTTTGATTCTTGAGC-----                                                                           | morL    | 22  | 3     |
| -----TGACGTTTGATTCTTGAGC-----                                                                            | morL    | 19  | 3     |
| -TGTGCTGACGTTTGATTCTTGAGCAGA-----                                                                        | morL    | 27  | 2     |
| -TGTGCTGACGTTTGATTCTTG-----                                                                              | morL    | 21  | 2     |
| CTGTGCTGACGTTTGATTCTTGAGCAG-----                                                                         | morL    | 27  | 2     |
| ---TGCTGACGTTTGATTCTTG-----                                                                              | morL    | 19  | 1     |
| CTGTGCTGACGTTTGATTCTTGAGCA-----                                                                          | morL    | 26  | 1     |
| CTGTGCTGACGTTTGATTCTTGAG-----                                                                            | morL    | 24  | 1     |
| -----ACGTTTGATTCTTGAGCAG-----                                                                            | morL    | 19  | 1     |
| -----TGACGTTTGATTCTTGAGCA-----                                                                           | morL    | 20  | 1     |
| -----GACGTTTGATTCTTGAGCA-----                                                                            | morL    | 19  | 1     |
| -----GCTGACGTTTGATTCTTG-----                                                                             | morL    | 18  | 1     |
| -----AGAGGTTGCCCTTGGTGAATTC-----                                                                         | mirL    | 22  | 1706  |
| -----AGAGGTTGCCCTTGGTGAATT-----                                                                          | mirL    | 21  | 723   |
| -----AGAGGTTGCCCTTGGTGAAT-----                                                                           | mirL    | 20  | 245   |
| -----AGAGGTTGCCCTTGGTGA-----                                                                             | mirL    | 19  | 99    |
| -----GGTTGCCCTTGGTGAATTC-----                                                                            | mirL    | 19  | 77    |
| -----AGAGGTTGCCCTTGGTGAATTCG-----                                                                        | mirL    | 23  | 68    |
| -----AGGTTGCCCTTGGTGAATTCGC-----                                                                         | mirL    | 22  | 45    |
| -----GAGGTTGCCCTTGGTGAATTC-----                                                                          | mirL    | 21  | 43    |
| -----AGAGGTTGCCCTTGGTGA-----                                                                             | mirL    | 18  | 40    |
| -----AGGTTGCCCTTGGTGAATTC-----                                                                           | mirL    | 20  | 38    |
| -----GAGGTTGCCCTTGGTGAATT-----                                                                           | mirL    | 20  | 24    |
| -----GGTTGCCCTTGGTGAATT-----                                                                             | mirL    | 18  | 23    |

```

-----AGAGGTTGCCCTTGGTGAATTCGC----- mirL 24 15
-----AGGTTGCCCTTGGTGAATT----- mirL 19 13
-----GAGGTTGCCCTTGGTGAATTCG----- mirL 22 9
-----CAGAGGTTGCCCTTGGTGAATTC----- mirL 23 8
-----AGGTTGCCCTTGGTGAATTCG----- mirL 21 5
-----AGGTTGCCCTTGGTGAAT----- mirL 18 4
-----GAGGTTGCCCTTGGTGAATTCGC----- mirL 23 3
-----AGGTTGCCCTTGGTGAATTCGCT----- mirL 23 3
-----GAGGTTGCCCTTGGTGAAT----- mirL 19 3
-----AGGTTGCCCTTGGTGAATTCGCTT----- mirL 24 1
-----GAGGTTGCCCTTGGTGAA----- mirL 18 1
-----GGTGCCTTGGTGAATTCG----- mirL 20 1
-----TGAATCACACAAAGGCAACTTTT----- mirR 23 686
-----ATCACACAAAGGCAACTTTTGT----- mirR 22 263
-----TGAATCACACAAAGGCAACT----- mirR 20 193
-----TGAATCACACAAAGGCAACTTT----- mirR 22 174
-----TGAATCACACAAAGGCAAC----- mirR 19 154
-----ATCACACAAAGGCAACTTTTGT----- mirR 21 121
-----TGAATCACACAAAGGCAACTTTTGT----- mirR 24 120
-----TGAATCACACAAAGGCAACTTT----- mirR 21 108
-----ATCACACAAAGGCAACTTTT----- mirR 20 59
-----TGAATCACACAAAGGCAA----- mirR 18 50
-----ATCACACAAAGGCAACTTT----- mirR 18 37
-----ATCACACAAAGGCAACTTTTGT----- mirR 23 34
-----GAATCACACAAAGGCAACTTTT----- mirR 22 33
-----AATCACACAAAGGCAACTTTT----- mirR 21 22
-----AATCACACAAAGGCAACTTTTGT----- mirR 22 19
-----ATCACACAAAGGCAACTTT----- mirR 19 17
-----AATCACACAAAGGCAACTTTTGT----- mirR 23 17
-----ATCACACAAAGGCAACTTTTGT----- mirR 24 16
-----GAATCACACAAAGGCAACTTT----- mirR 21 10
-----AATCACACAAAGGCAACT----- mirR 18 7
-----GAATCACACAAAGGCAACT----- mirR 19 4
-----AATCACACAAAGGCAACTTT----- mirR 19 3
-----GAATCACACAAAGGCAACTTT----- mirR 20 3
-----AATCACACAAAGGCAACTTT----- mirR 20 2
-----AATCACACAAAGGCAACTTTTGT----- mirR 24 1
-----GAATCACACAAAGGCAACTTTTGT----- mirR 23 1
-----GAATCACACAAAGGCAAC----- mirR 18 1
-----TGAGTATCAAAGCCTGCT----- morR 18 3
-----TGAGTATCAAAGCCTGCTTGGG----- morR 22 1
-----TGAGTATCAAAGCCTGCTTG----- morR 20 1
-----TTGTTTGAGTATCAAAGC----- morR 18 1

```

>mmu-mir-483

CGGACCGTGGGGGAGAGGGGAAGACGGGAGAAGAGAAGGGAGTGGTTTTGGGTGCCTCACTCCTCCCCTCCCGTCTGTCTCCTGCCCTATCTTCC species len reads

```

---ACCGTGGGGGAGAGGGGG--- morL 18 5
---CCGTGGGGGAGAGGGGGAA--- morL 19 3
---CCGTGGGGGAGAGGGGGGA--- morL 18 1
---CGTGGGGGAGAGGGGGAA--- morL 18 1
---CCGTGGGGGAGAGGGGGAAAG--- morL 20 1
CGGACCGTGGGGGAGAGGG--- morL 19 1
-----AAGACGGGAGAAGAGAAGGGAG--- mirL 22 1399
-----AAGACGGGAGAAGAGAAGGGAGT--- mirL 23 712
-----AAGACGGGAGAAGAGAAGGGA--- mirL 21 249
-----AAGACGGGAGAAGAGAAG--- mirL 18 230
-----AAGACGGGAGAAGAGAAGGG--- mirL 20 114
-----AAGACGGGAGAAGAGAAGGGAGT--- mirL 24 76
-----AGACGGGAGAAGAGAAGGGAG--- mirL 21 63
-----AAGACGGGAGAAGAGAAGG--- mirL 19 53
-----ACGGGAGAAGAGAAGGGAG--- mirL 19 26
-----AGACGGGAGAAGAGAAGGGAGT--- mirL 22 23
-----AGACGGGAGAAGAGAAGGGA--- mirL 20 10
-----GACGGGAGAAGAGAAGGGAGT--- mirL 21 9
-----GAAGACGGGAGAAGAGAAG--- mirL 19 8
-----GACGGGAGAAGAGAAGGGAG--- mirL 20 8
-----AGACGGGAGAAGAGAAGGG--- mirL 19 4
-----GACGGGAGAAGAGAAGGGA--- mirL 19 4
-----ACGGGAGAAGAGAAGGGAGT--- mirL 20 2
-----GAAGACGGGAGAAGAGAAGG--- mirL 20 1
-----GGAAGACGGGAGAAGAGA--- mirL 18 1
-----GAAGACGGGAGAAGAGAAGGGA--- mirL 22 1
-----ACGGGAGAAGAGAAGGGA--- mirL 18 1
-----AGACGGGAGAAGAGAAGG--- mirL 18 1
-----AGACGGGAGAAGAGAAGGGAGT--- mirL 23 1
-----AGTGGTTTTTGGGTGCCT--- loop 18 3
-----TGTTTTTGGGTGCCTCA--- loop 18 1
-----GTGGTTTTTGGGTGCCTC--- loop 18 1
-----TCACTCCTCCCCTCCCGTCTT--- mirR 21 728
-----CACTCCTCCCCTCCCGTCTTGT--- mirR 22 367
-----TCACTCCTCCCCTCCCGTCTTG--- mirR 22 344
-----TCACTCCTCCCCTCCCGTCTTGT--- mirR 23 311
-----TCACTCCTCCCCTCCCGTCT--- mirR 20 123
-----TCACTCCTCCCCTCCCGTC--- mirR 19 88
-----CACTCCTCCCCTCCCGTCTG--- mirR 21 85
-----TCACTCCTCCCCTCCCGT--- mirR 18 63
-----CACTCCTCCCCTCCCGTCTTGT--- mirR 23 54
-----TCACTCCTCCCCTCCCGTCTTGT--- mirR 24 50
-----CACTCCTCCCCTCCCGTCTT--- mirR 20 44
-----CACTCCTCCCCTCCCGTC--- mirR 18 18
-----ACTCCTCCCCTCCCGTCTT--- mirR 19 14
-----CACTCCTCCCCTCCCGTCT--- mirR 19 10

```

```

-----ACTCCTCCCCTCCCGTCTTG----- mirR 20 8
-----CACTCCTCCCCTCCCGTCTGTTC----- mirR 24 7
-----ACTCCTCCCCTCCCGTCTTGT----- mirR 21 7
-----CTCCTCCCCTCCCGTCTT----- mirR 18 6
-----CTCCTCCCCTCCCGTCTTGT----- mirR 20 6
-----ACTCCTCCCCTCCCGTCT----- mirR 18 5
-----ACTCCTCCCCTCCCGTCTGT----- mirR 22 3
-----CTCCTCCCCTCCCGTCTTG----- mirR 19 3
-----CCTCACTCCTCCCCTCCC----- mirR 18 2
-----GCCTCACTCCTCCCCTCCC----- mirR 19 2
-----ACTCCTCCCCTCCCGTCTGTTC----- mirR 23 2
-----CCTCACTCCTCCCCTCCCG----- mirR 19 1
-----ACTCCTCCCCTCCCGTCTGTTC----- mirR 25 1
-----GCCTCACTCCTCCCCTCC----- mirR 18 1
-----CTCACTCCTCCCCTCCCGTCTTG----- mirR 23 1
-----CTCACTCCTCCCCTCCCG----- mirR 18 1
-----CTTGTTCTCTCCTGCCCT----- morR 18 1
-----TTCTCTCCTGCCCTATCTT----- morR 19 1
-----TCTCTCCTGCCCTATCTTCC----- morR 20 1
-----TTGTTCTCTCCTGCCCTA----- morR 18 1
-----TCTCTCCTGCCCTATCTTC----- morR 19 1

```

>mmu-mir-302d

```

TGCTTAAGGGCCTCCTTTACTTTAATCATGGAGGCACTTGCTGTGCATTTAAAAATAAGTGCTTCCATGTTTGAGTGTGGT species len reads
-GCTTAAGGGCCTCCTTTA----- morL 19 2
TGCTTAAGGGCCTCCTT----- morL 18 1
-----ACTTTAATCATGGAGGCACTTGC----- mirL 22 1655
-----ACTTTAATCATGGAGGCACTTG----- mirL 21 469
-----ACTTTAATCATGGAGGCACTT----- mirL 20 160
-----ACTTTAATCATGGAGGCACTTGCT----- mirL 23 106
-----ACTTTAATCATGGAGGCACT----- mirL 19 77
-----ACTTTAATCATGGAGGCAC----- mirL 18 47
-----TTAATCATGGAGGCACTTGC----- mirL 19 18
-----TTTAATCATGGAGGCACTTGC----- mirL 20 11
-----TTAATCATGGAGGCACTTG----- mirL 18 6
-----ACTTTAATCATGGAGGCACTTGCTG----- mirL 24 4
-----CTTTAATCATGGAGGCACTTGC----- mirL 21 4
-----TTAATCATGGAGGCACTTGCT----- mirL 20 3
-----CTTTAATCATGGAGGCACTTG----- mirL 20 1
-----TTTAATCATGGAGGCACTTG----- mirL 19 1
-----TTTAATCATGGAGGCACTT----- mirL 18 1
-----TTTAATCATGGAGGCACTTGCT----- mirL 21 1
-----CTTTAATCATGGAGGCACTT----- mirL 19 1
-----TAAGTGCTTCCATGTTTGAGTGT----- mirR 23 958
-----AAGTGCTTCCATGTTTGAGTGT----- mirR 22 954
-----AGTGCTTCCATGTTTGAGTGT----- mirR 21 171

```

```
-----AAGTGCTTCCATGTTTGAGTGTG-- mirR 23 133
-----AAGTGCTTCCATGTTTGAGTGTG--- mirR 21 101
-----GTGCTTCCATGTTTGAGTGT--- mirR 20 85
-----TAAGTGCTTCCATGTTTGAGTGTG-- mirR 24 76
-----AAGTGCTTCCATGTTTGA----- mirR 18 50
-----TAAGTGCTTCCATGTTTGAGTGTG--- mirR 22 40
-----TAAGTGCTTCCATGTTTG----- mirR 18 33
-----TAAGTGCTTCCATGTTTGAGTGTGG- mirR 25 31
-----TAAGTGCTTCCATGTTTGA----- mirR 19 26
-----AAGTGCTTCCATGTTTGAGT----- mirR 20 19
-----AAGTGCTTCCATGTTTGAGTGTGG- mirR 24 18
-----AGTGCTTCCATGTTTGAGTGTG--- mirR 20 16
-----AAGTGCTTCCATGTTTGAG----- mirR 19 10
-----AGTGCTTCCATGTTTGAGTGTG-- mirR 22 10
-----GTGCTTCCATGTTTGAGTGTG-- mirR 21 10
-----AGTGCTTCCATGTTTGAGT----- mirR 19 6
-----TAAGTGCTTCCATGTTTGAGT----- mirR 21 6
-----GTGCTTCCATGTTTGAGTGTG--- mirR 19 4
-----GTGCTTCCATGTTTGAGTGTGG- mirR 22 2
-----GTGCTTCCATGTTTGAGT----- mirR 18 2
-----AGTGCTTCCATGTTTGAGTGTGG- mirR 23 2
-----AGTGCTTCCATGTTTGAGTGTGGT mirR 24 1
-----AGTGCTTCCATGTTTGAG----- mirR 18 1
```

>mmu-mir-1983

```
GTGCACAGCCTTTACAGAGAAAGCATGCTCCAGTGGCGCAATCGGTTAGCGCGGTTACTTATACAGCAGTATATGTGCGGGTGATGCCGAGGTTGTGAGTTCGAGCCTCACCTGGAGCATGTTTCTCCCTTTCCGCCT
--GCACAGCCTTTACAGAGAA-----
GTGCACAGCCTTTACAGAA-----
-----AAAGCATGCTCCAGTGGCGCAATC-----
-----GAAAGCATGCTCCAGTGGCG-----
-----AAAGCATGCTCCAGTGGCGC-----
-----AAAGCATGCTCCAGTGGCG-----
-----AAAGCATGCTCCAGTGGCGCA-----
-----GAAAGCATGCTCCAGTGGCGC-----
-----GAAAGCATGCTCCAGTGGC-----
-----AGCATGCTCCAGTGGCGCAATC-----
-----AAAGCATGCTCCAGTGGC-----
-----GAAAGCATGCTCCAGTGG-----
-----GAAAGCATGCTCCAGTGGCGCAATC-----
-----AGCATGCTCCAGTGGCGCAATCG-----
-----AAAGCATGCTCCAGTGGCGCAA-----
-----AAGCATGCTCCAGTGGCGCAATC-----
-----AAAGCATGCTCCAGTGGCGCAATCGGTTAGC-----
-----AAGCATGCTCCAGTGGCGCAA-----
-----AAGCATGCTCCAGTGGCGCAAT-----
-----AGAAAGCATGCTCCAGTGGCG-----
```

```
-----AGCATGCTCCAGTGGCGCAAT-----  
-----AGAAAGCATGCTCCAGTGG-----  
-----AGAAAGCATGCTCCAGTGGCGC-----  
-----AGAAAGCATGCTCCAGTGGC-----  
-----AGCATGCTCCAGTGGCGCAA-----  
-----AGCATGCTCCAGTGGCGCA-----  
-----GAAAGCATGCTCCAGTGGCGCAATCGGTTAGC-----  
-----GAAAGCATGCTCCAGTGGCGCA-----  
-----AAGCATGCTCCAGTGGCGCAATCG-----  
-----AGCATGCTCCAGTGGCGC-----  
-----AAGCATGCTCCAGTGGCGC-----  
-----AGCATGCTCCAGTGGCGCAATCGGTTAGC-----  
-----AAGCATGCTCCAGTGGCG-----  
-----GCATGCTCCAGTGGCGCAATCGGT-----  
-----AAGCATGCTCCAGTGGCGCAATCGGTTAGC-----  
-----AGAAAGCATGCTCCAGTGGCGCA-----  
-----GCATGCTCCAGTGGCGCAATCGGTT-----  
-----CTCACCTGGAGCATGTTTTCT-----  
-----CTCACCTGGAGCATGTTTTCT-----  
-----CTCACCTGGAGCATGTTTT-----  
-----GCCTCACCTGGAGCATGT-----  
-----CTCACCTGGAGCATGTTTT-----  
-----CTCACCTGGAGCATGTTTTCTT-----  
-----CTCACCTGGAGCATGTTTTCTTC-----  
-----TCACCTGGAGCATGTTTTCTT-----  
-----TCACCTGGAGCATGTTTTCTTC-----  
-----TCACCTGGAGCATGTTTTCT-----  
-----CCTCACCTGGAGCATGTT-----  
-----TCACCTGGAGCATGTTTTCT-----  
-----GCCTCACCTGGAGCATGTT-----  
-----CTCACCTGGAGCATGTTTTCTTCC-----  
-----ACCTGGAGCATGTTTTCTTCCC-----  
-----TCACCTGGAGCATGTTTT-----  
-----TCACCTGGAGCATGTTTTCTTCC-----  
-----AGCCTCACCTGGAGCATGT-----  
-----TCACCTGGAGCATGTTTTCTTCCC-----  
-----CCTCACCTGGAGCATGTTTT-----  
-----AGCCTCACCTGGAGCATGTT-----  
-----CCTCACCTGGAGCATGTTTT-----  
-----CCTCACCTGGAGCATGTTTTCT-----  
-----ACCTGGAGCATGTTTTCT-----  
-----CCTCACCTGGAGCATGTTTTCT-----  
-----CACCTGGAGCATGTTTTCTT-----  
-----CACCTGGAGCATGTTTTCTTCCC-----  
-----ACCTGGAGCATGTTTTCTTCC-----  
-----AGCCTCACCTGGAGCATGTT-----
```

```

-----AGCCTCACCTGGAGCATGTTTT-----
-----ACCTGGAGCATGTTTCTTCCCT-----
-----GCCTCACCTGGAGCATGTTT-----
-----CACCTGGAGCATGTTTTC-----
-----AGCCTCACCTGGAGCATGTTTTC-----
-----ACCTGGAGCATGTTTCTTCC-----
-----CACCTGGAGCATGTTTCT-----
-----CACCTGGAGCATGTTTCTTCC-----
-----GCCTCACCTGGAGCATGTTT-----
-----CACCTGGAGCATGTTTCTTCCCT-----
-----GCCTCACCTGGAGCATGTTTTC-----
-----ACCTGGAGCATGTTTCTTCCCT-----
-----AGCCTCACCTGGAGCATG-----
-----ACCTGGAGCATGTTTCTTCCCTTTC-----
-----AGCCTCACCTGGAGCATGTTTCT-----
-----CACCTGGAGCATGTTTCTTCC-----
-----GCCTCACCTGGAGCATGTTTCTTCC-----
-----CCTCACCTGGAGCATGTTTCTTCC-----
-----CCTTTCCGCCT-----
-----CCCTTTCCGCCT-----
-----TTCCCTTTCCGCCT-----
-----CCTTTCCGCCT-----
-----CTTCCCTTTCCGCCT-----

```

>mmu-mir-1198

| TTTGTTTGTGACAGTTGTCTGTTATGTGTTTCTGGCTGGCTTGGTACTCATGTGTAGCCCAAGCTAGCCTCTAACTCATGGCAGTCATCCTGTCTCAGTCTCCT | species | len | reads |
|----------------------------------------------------------------------------------------------------------|---------|-----|-------|
| TTTGTTTGTGACAGTTGTC                                                                                      | morL    | 19  | 1     |
| TTTGTTGACAGTTGTCTGT                                                                                      | morL    | 18  | 1     |
| TATGTGTTTCTGGCTGGCTTGG                                                                                   | mirL    | 22  | 2453  |
| TATGTGTTTCTGGCTGGCTTG                                                                                    | mirL    | 21  | 1121  |
| TATGTGTTTCTGGCTGGCTTGGT                                                                                  | mirL    | 23  | 647   |
| TATGTGTTTCTGGCTGGCTT                                                                                     | mirL    | 20  | 216   |
| TATGTGTTTCTGGCTGGC                                                                                       | mirL    | 18  | 162   |
| TATGTGTTTCTGGCTGGCTTGGTA                                                                                 | mirL    | 24  | 135   |
| ATGTGTTTCTGGCTGGCTTGG                                                                                    | mirL    | 21  | 118   |
| TATGTGTTTCTGGCTGGCTTGGTAC                                                                                | mirL    | 25  | 105   |
| ATGTGTTTCTGGCTGGCTTG                                                                                     | mirL    | 20  | 62    |
| ATGTGTTTCTGGCTGGCTTGGT                                                                                   | mirL    | 22  | 34    |
| ATGTGTTTCTGGCTGGCTT                                                                                      | mirL    | 19  | 25    |
| ATGTGTTTCTGGCTGGCTTGGTA                                                                                  | mirL    | 23  | 11    |
| TGTGTTTCTGGCTGGCTTGG                                                                                     | mirL    | 20  | 5     |
| ATGTGTTTCTGGCTGGCT                                                                                       | mirL    | 18  | 5     |
| GTGTTTCTGGCTGGCTTG                                                                                       | mirL    | 18  | 5     |
| TGTGTTTCTGGCTGGCTTG                                                                                      | mirL    | 19  | 4     |
| GTGTTTCTGGCTGGCTTGG                                                                                      | mirL    | 19  | 3     |
| ATGTGTTTCTGGCTGGCTTGGTACT                                                                                | mirL    | 25  | 3     |



```

-----TTATGTGTTTCCTGGCTGGCTTGGTA----- mirL 25 2
-----TGTGTTTCCTGGCTGGCTTGGT----- mirL 21 2
-----GTGTTTCCTGGCTGGCTTGGT----- mirL 20 1
-----GTGTTTCCTGGCTGGCTTGGTA----- mirL 21 1
-----TTATGTGTTTCCTGGCTGGC----- mirL 19 1
-----TTATGTGTTTCCTGGCTGGCTTG----- mirL 22 1
-----TTATGTGTTTCCTGGCTGGCTTGG----- mirL 23 1
-----ACTCATGTGTAGCCCAAG----- loop 18 1
-----AAGCTAGCCTCTAACTCATGGC----- mirR 22 25
-----AAGCTAGCCTCTAACTCATGG----- mirR 21 10
-----AAGCTAGCCTCTAACTCATGGCA----- mirR 23 6
-----AAGCTAGCCTCTAACTCATGGCAG----- mirR 24 4
-----AAGCTAGCCTCTAACTCATG----- mirR 20 3
-----AAGCTAGCCTCTAACTCAT----- mirR 19 3
-----AAGCTAGCCTCTAACTCA----- mirR 18 2
-----CTAGCCTCTAACTCATGGC----- mirR 19 1
-----GGCAGTCATCCTGTCTCAGT----- morR 20 2
-----CAGTCATCCTGTCTCAGTC----- morR 19 1
-----TCATCCTGTCTCAGTCTC----- morR 18 1
-----GGCAGTCATCCTGTCTCAGTC----- morR 21 1
-----CATCCTGTCTCAGTCTCCT morR 19 1
-----GGCAGTCATCCTGTCTCAG----- morR 19 1
-----CATCCTGTCTCAGTCTCC----- morR 18 1
-----TCATCCTGTCTCAGTCTCCT morR 20 1

>mmu-mir-653
TCTGAGATTTCAATCTTTTCAGTGTTGAAACAATCTCTACTGAACCAAGCTCCAAGCGAGTTCACTGGAGTTTGTTCAGTATTGCAGGAGTGCTAAGTGTGA species len reads
TCTGAGATTTCAATCTTT----- morL 18 1
-----GTGTTGAAACAATCTCTACTG----- mirL 21 1420
-----GTGTTGAAACAATCTCTAC----- mirL 19 1220
-----GTGTTGAAACAATCTCTACT----- mirL 20 1112
-----GTGTTGAAACAATCTCTA----- mirL 18 470
-----TTGAAACAATCTCTACTGAAC----- mirL 21 216
-----TTGAAACAATCTCTACTG----- mirL 18 158
-----GTGTTGAAACAATCTCTACTGA----- mirL 22 145
-----TTGAAACAATCTCTACTGAA----- mirL 20 117
-----TTGAAACAATCTCTACTGAACC----- mirL 22 97
-----GTTGAAACAATCTCTACT----- mirL 18 36
-----TTGAAACAATCTCTACTGA----- mirL 19 33
-----GTTGAAACAATCTCTACTG----- mirL 19 29
-----TGTTGAAACAATCTCTAC----- mirL 18 16
-----TGTTGAAACAATCTCTACT----- mirL 19 14
-----TTGAAACAATCTCTACTGAACCA----- mirL 23 11
-----TGTTGAAACAATCTCTACTG----- mirL 20 8
-----GTGTTGAAACAATCTCTACTGAA----- mirL 23 4
-----AGTGTTGAAACAATCTCTACTG----- mirL 22 3

```

```

-----TTGAAACAATCTCTACTGAACCAA----- mirL 24 2
-----GTGTTGAAACAATCTCTACTGAAC----- mirL 24 2
-----AGTGTGAAACAATCTCTAC----- mirL 20 2
-----AGTGTGAAACAATCTCT----- mirL 18 1
-----GTTGAAACAATCTCTACTGA----- mirL 20 1
-----CCAAGCTCCAAAGCGAGTT----- loop 19 1
-----CCAAGCTCCAAAGCGAGTTC----- loop 20 1
-----CAAGCTCCAAAGCGAGTTC----- loop 19 1
-----TTCACTGGAGTTTGTTCAGTA----- mirR 22 3
-----TTCACTGGAGTTTGTTC----- mirR 18 1
-----GCAGGAGTGCTAAGTGTG----- morR 18 1
-----CAGGAGTGCTAAGTGTGA morR 18 1

```

>mmu-mir-1224

```

ACCATGACTACCTGCCTCTGGTGAGGACTGGGGAGGTGGAGGGTAGCATCATTAGAGCCAGAGCTCTGTCTCAGCTCCCTCTCCCCCACCTCTTCTCTCCTCAGGTACGACTGCAAGAGGCACCA species len
ACCATGACTACCTGCCTCT----- morL 19 1
-----GTGAGGACTGGGGAGGTGGAG----- mirL 21 1055
-----GTGAGGACTGGGGAGGTGGAGG----- mirL 22 579
-----GTGAGGACTGGGGAGGTGGAGG----- mirL 23 295
-----GTGAGGACTGGGGAGGTGGA----- mirL 20 271
-----GTGAGGACTGGGGAGGTGG----- mirL 19 214
-----GTGAGGACTGGGGAGGTGGAGGT----- mirL 24 203
-----GTGAGGACTGGGGAGGTG----- mirL 18 117
-----AGGACTGGGGAGGTGGAG----- mirL 18 8
-----CTGGTGAGGACTGGGGAG----- mirL 18 6
-----GAGGACTGGGGAGGTGGAG----- mirL 19 6
-----TGAGGACTGGGGAGGTGGAG----- mirL 20 5
-----GGTGAGGACTGGGGAGGTGGAG----- mirL 22 4
-----AGGACTGGGGAGGTGGAGG----- mirL 19 3
-----GAGGACTGGGGAGGTGGA----- mirL 18 2
-----TGAGGACTGGGGAGGTGG----- mirL 18 2
-----GAGGACTGGGGAGGTGGAGG----- mirL 20 2
-----TGAGGACTGGGGAGGTGGA----- mirL 19 2
-----GGTGAGGACTGGGGAGGTGGA----- mirL 21 1
-----GGTGAGGACTGGGGAGGTG----- mirL 19 1
-----AGGACTGGGGAGGTGGAGGG----- mirL 20 1
-----GGTGAGGACTGGGGAGGTGGAGG----- mirL 23 1
-----TGAGGACTGGGGAGGTGGAGGGT----- mirL 23 1
-----AGGACTGGGGAGGTGGAGGGTAGC----- mirL 24 1
-----CCCCACCTCTTCTCTCCTCAGG----- mirR 22 1061
-----CCCCACCTCTTCTCTCCTC----- mirR 19 307
-----CCCCACCTCTTCTCTCCTCAG----- mirR 21 299
-----CCCCACCTCTTCTCTCCTCAGGT----- mirR 23 275
-----CCCCACCTCTTCTCTCCTCA----- mirR 20 185
-----CCCCACCTCTTCTCTCCTCAGGTA----- mirR 24 93
-----CCCCACCTCTTCTCTCCTCAGGTAC----- mirR 25 27

```

```

-----CCACCTCTTCTCTCCTCAGGT----- mirR 22 18
-----CCACCTCTTCTCTCCTCAGG----- mirR 21 16
-----CCACCTCTTCTCTCCTCAGGTA----- mirR 23 12
-----CCACCTCTTCTCTCCTC----- mirR 18 10
-----CCACCTCTTCTCTCCTCA----- mirR 19 4
-----CCACCTCTTCTCTCCTCAG----- mirR 20 3
-----CCACCTCTTCTCTCCTCAGGTAC----- mirR 24 3
-----CCCCCACCTCTTCTCTC----- mirR 18 1
-----CCACCTCTTCTCTCCTCAG----- mirR 19 1
-----CCACCTCTTCTCTCCTCAGGT----- mirR 21 1
-----CACCTCTTCTCTCCTCAGG----- mirR 19 1
-----CCCCCACCTCTTCTCTCCT----- mirR 20 1
-----CGACTGCAAGAGGCACCA morR 18 1
-----TACGACTGCAAGAGGCACCA morR 20 1
-----AGGTACGACTGCAAGAGG----- morR 18 1

```

>mmu-mir-10b

```

AGGTTGTAACGTTGTCTATATATACCTGTAGAACCGAATTTGTGTGGTACCCACATAGTCACAGATTCGATTCTAGGGGAATATA species len reads
AGGTTGTAACGTTGTCTATATAT----- morL 23 1
-----CCCTGTAGAACCGAATTTGTGT----- mirL 22 604
-----TACCCTGTAGAACCGAATTT----- mirL 20 583
-----TACCCTGTAGAACCGAATTTG----- mirL 21 418
-----CCCTGTAGAACCGAATTTGT----- mirL 20 337
-----CCCTGTAGAACCGAATTTGTG----- mirL 21 281
-----TACCCTGTAGAACCGAAT----- mirL 18 279
-----CCCTGTAGAACCGAATTTG----- mirL 19 261
-----TACCCTGTAGAACCGAATTTGT----- mirL 22 250
-----TACCCTGTAGAACCGAATTTGTG----- mirL 23 219
-----TACCCTGTAGAACCGAATT----- mirL 19 215
-----CCCTGTAGAACCGAATTT----- mirL 18 106
-----CCCTGTAGAACCGAATTTGTGTG----- mirL 23 101
-----CCCTGTAGAACCGAATTTGTGTGG----- mirL 24 78
-----ACCCTGTAGAACCGAATTT----- mirL 19 51
-----ACCCTGTAGAACCGAATTTGT----- mirL 21 45
-----ACCCTGTAGAACCGAATTTGTG----- mirL 22 41
-----ACCCTGTAGAACCGAATTTG----- mirL 20 38
-----TACCCTGTAGAACCGAATTTGTGT----- mirL 24 29
-----CCTGTAGAACCGAATTTG----- mirL 18 19
-----ACCCTGTAGAACCGAATTTGTGT----- mirL 23 19
-----CTGTAGAACCGAATTTGT----- mirL 18 17
-----CCTGTAGAACCGAATTTGT----- mirL 19 16
-----ACCCTGTAGAACCGAATT----- mirL 18 16
-----TGTAGAACCGAATTTGTG----- mirL 18 11
-----CTGTAGAACCGAATTTGTG----- mirL 19 9
-----CCTGTAGAACCGAATTTGTG----- mirL 20 4
-----CCTGTAGAACCGAATTTGTGT----- mirL 21 4

```

```

-----TGTAGAACCGAATTTGTGT----- mirL 19 3
-----CTGTAGAACCGAATTTGTGT----- mirL 20 3
-----CCTGTAGAACCGAATTTGTGTGG----- mirL 23 2
-----CCTGTAGAACCGAATTTGTGTGGTACCC----- mirL 28 2
-----ACCCTGTAGAACCGAATTTGTGTG----- mirL 24 1
-----ATACCCTGTAGAACCGAATTT----- mirL 21 1
-----CAGATTCGATTCTAGGGGAATA-- mirR 22 319
-----ACAGATTCGATTCTAGGGGAA--- mirR 21 227
-----ACAGATTCGATTCTAGGGGAAT-- mirR 22 210
-----CAGATTCGATTCTAGGGGAATAT- mirR 23 46
-----CAGATTCGATTCTAGGGGA--- mirR 19 35
-----CAGATTCGATTCTAGGGGAAT--- mirR 21 35
-----ACAGATTCGATTCTAGGGGA--- mirR 20 30
-----CAGATTCGATTCTAGGGGAA--- mirR 20 30
-----ACAGATTCGATTCTAGGGG---- mirR 19 16
-----ACAGATTCGATTCTAGGGGAATA-- mirR 23 16
-----GATTCGATTCTAGGGGAAT-- mirR 19 14
-----CAGATTCGATTCTAGGGG---- mirR 18 10
-----GATTCGATTCTAGGGGAA--- mirR 18 7
-----AGATTCGATTCTAGGGGAATA-- mirR 21 6
-----ACAGATTCGATTCTAGGG---- mirR 18 6
-----AGATTCGATTCTAGGGGAAT--- mirR 20 5
-----AGATTCGATTCTAGGGGAA--- mirR 19 5
-----ATTCGATTCTAGGGGAAT--- mirR 18 4
-----ATTCGATTCTAGGGGAATA-- mirR 19 4
-----AGATTCGATTCTAGGGGAATAT- mirR 22 3
-----ACAGATTCGATTCTAGGGGAATAT- mirR 24 2
-----CACAGATTCGATTCTAGGGGAA--- mirR 22 2
-----GATTCGATTCTAGGGGAATA-- mirR 20 2
-----AGATTCGATTCTAGGGGAATATA mirR 23 2
-----CACAGATTCGATTCTAGGG---- mirR 19 1
-----ATTCGATTCTAGGGGAATAT- mirR 20 1

```

>mmu-mir-122

```

TTTCCTTAGCAGAGCTGTGGAGTGTGACAATGGTGTGTTGTGTCCAAACCATCAAACGCCATTATCACACTAAATAGCTACTGCTAGGCAATC species len reads
TTTCCTTAGCAGAGCTGTG----- morL 19 1
-----TGGAGTGTGACAATGGTGTGTTG----- mirL 22 843
-----TGGAGTGTGACAATGGTGTGTT----- mirL 21 740
-----TGGAGTGTGACAATGGTGTGTT----- mirL 20 340
-----TGGAGTGTGACAATGGTGTGTTGT----- mirL 23 228
-----TGGAGTGTGACAATGGTGT----- mirL 19 124
-----GGAGTGTGACAATGGTGTGTTG----- mirL 21 86
-----TGGAGTGTGACAATGGTG----- mirL 18 82
-----GAGTGTGACAATGGTGTGTTG----- mirL 20 59
-----GGAGTGTGACAATGGTGTGTT----- mirL 20 43
-----GGAGTGTGACAATGGTGTGTT----- mirL 19 41

```

```

-----GAGTGTGACAATGGTGTTT----- mirL 19 36
-----AGTGTGACAATGGTGTTTG----- mirL 19 27
-----GAGTGTGACAATGGTGTTT----- mirL 18 21
-----GGAGTGTGACAATGGTGTTTGT----- mirL 22 15
-----TGGAGTGTGACAATGGTGTTTGTG----- mirL 24 13
-----GGAGTGTGACAATGGTGT----- mirL 18 10
-----AGTGTGACAATGGTGTTT----- mirL 18 9
-----GAGTGTGACAATGGTGTTTGT----- mirL 21 7
-----GTGGAGTGTGACAATGGTGTTT----- mirL 22 1
-----GAGTGTGACAATGGTGTTTGTG----- mirL 22 1
-----TGTGGAGTGTGACAATGG----- mirL 18 1
-----GTGGAGTGTGACAATGGTGTTTGT----- mirL 24 1
-----AGTGTGACAATGGTGTTTGT----- mirL 20 1
-----AACGCCATTATCACACTAA----- mirR 19 733
-----AACGCCATTATCACACTAAATA----- mirR 22 498
-----AACGCCATTATCACACTAAA----- mirR 20 301
-----AACGCCATTATCACACTA----- mirR 18 257
-----AACGCCATTATCACACTAAAT----- mirR 21 210
-----AACGCCATTATCACACTAAATAG----- mirR 23 178
-----ACGCCATTATCACACTAA----- mirR 18 35
-----ACGCCATTATCACACTAAATA----- mirR 21 20
-----CGCCATTATCACACTAAA----- mirR 18 16
-----CGCCATTATCACACTAAATA----- mirR 20 12
-----ACGCCATTATCACACTAAATAG----- mirR 22 11
-----GCCATTATCACACTAAATA----- mirR 19 11
-----ACGCCATTATCACACTAAA----- mirR 19 9
-----ACGCCATTATCACACTAAAT----- mirR 20 9
-----CGCCATTATCACACTAAATAG----- mirR 21 8
-----CGCCATTATCACACTAAAT----- mirR 19 7
-----AAACGCCATTATCACACTAA----- mirR 20 6
-----AAACGCCATTATCACACTAAAT----- mirR 22 5
-----AAACGCCATTATCACACTAAA----- mirR 21 4
-----AAACGCCATTATCACACT----- mirR 18 4
-----AACGCCATTATCACACTAAATAGC----- mirR 24 3
-----GCCATTATCACACTAAAT----- mirR 18 3
-----AAACGCCATTATCACACTA----- mirR 19 2
-----AAACGCCATTATCACACTAAATA----- mirR 23 2
-----GCCATTATCACACTAAATAG----- mirR 20 1
-----ACGCCATTATCACACTAAATAGC----- mirR 23 1
-----AGCTACTGCTAGGCAATC morR 18 1
-----TAAATAGCTACTGCTAGGC----- morR 19 1

>mmu-mir-1933
CATATCTGTCCTGATCCCACAGTCATGGTGTTCGGTCTTAGTTTGTGACCAGTTTAGTTTAAACCAGGACCATCAGTGTGACTATTGGATTGGGACTATCCAC species len reads
-----TCTGTCCTGATCCCACAG----- morL 18 1
CATATCTGTCCTGATCCC----- morL 18 1

```

```

-ATATCTGTCCTGATCCCA----- morL 18 1
----TCTGTCCTGATCCACAGT----- morL 19 1
-----AGTCATGGTGTTCGGTCTTAGTT----- mirL 24 703
-----AGTCATGGTGTTCGGTCTTAGTT----- mirL 23 181
-----AGTCATGGTGTTCGGTCTTAGTTTG----- mirL 25 162
-----AGTCATGGTGTTCGGTCTTAGT----- mirL 22 105
-----AGTCATGGTGTTCGGTCTTAG----- mirL 21 61
-----AGTCATGGTGTTCGGTCTTA----- mirL 20 53
-----AGTCATGGTGTTCGGTCT----- mirL 18 43
-----GTCATGGTGTTCGGTCTTAGTT----- mirL 23 19
-----CATGGTGTTCGGTCTTAGTT----- mirL 21 12
-----CACAGTCATGGTGTTCGG----- mirL 18 5
-----GTCATGGTGTTCGGTCTTAGTT----- mirL 22 5
-----CAGTCATGGTGTTCGGTCTTAGTT----- mirL 25 5
-----GTCATGGTGTTCGGTCTTAGT----- mirL 21 4
-----GTCATGGTGTTCGGTCTTAG----- mirL 20 3
-----CATGGTGTTCGGTCTTAG----- mirL 18 3
-----TCATGGTGTTCGGTCTTAGTT----- mirL 22 3
-----TCATGGTGTTCGGTCTTAGTT----- mirL 21 3
-----GTCATGGTGTTCGGTCTTA----- mirL 19 2
-----CATGGTGTTCGGTCTTAGTT----- mirL 20 2
-----CATGGTGTTCGGTCTTAGTTTG----- mirL 22 2
-----GTCATGGTGTTCGGTCTTAGTTTG----- mirL 24 1
-----CAGTCATGGTGTTCGGTCTTAGTT----- mirL 24 1
-----TCATGGTGTTCGGTCTTAGTTTGAC----- mirL 27 1
-----CACAGTCATGGTGTTCGGT----- mirL 19 1
-----TCATGGTGTTCGGTCTTA----- mirL 18 1
-----ACAGTCATGGTGTTCGGTC----- mirL 19 1
-----CACAGTCATGGTGTTCGGTCTTA----- mirL 23 1
-----CAGTCATGGTGTTCGGTC----- mirL 18 1
-----GTCATGGTGTTCGGTCTTAGTTTG----- mirL 25 1
-----CACAGTCATGGTGTTCGGTC----- mirL 20 1
-----TCATGGTGTTCGGTCTTAGT----- mirL 20 1
-----TGACCAGTTTAGTTTAAACCA----- loop 20 1
-----TGTGACCAGTTTAGTTTA----- loop 18 1
-----CCAGGACCATCAGTGTGACTAT----- mirR 22 2628
-----CCAGGACCATCAGTGTGACTA----- mirR 21 368
-----CAGGACCATCAGTGTGACTAT----- mirR 21 143
-----CCAGGACCATCAGTGTGACTATT----- mirR 23 91
-----CCAGGACCATCAGTGTGACT----- mirR 20 86
-----AGGACCATCAGTGTGACTAT----- mirR 20 83
-----GGACCATCAGTGTGACTAT----- mirR 19 31
-----CCAGGACCATCAGTGTGA----- mirR 18 30
-----CCAGGACCATCAGTGTGAC----- mirR 19 24
-----AGGACCATCAGTGTGACTA----- mirR 19 19
-----CAGGACCATCAGTGTGACTA----- mirR 20 16

```

```
-----GGACCATCAGTGTGACTA----- mirR 18 13
-----CCAGGACCATCAGTGTGACTATTG----- mirR 24 11
-----AGGACCATCAGTGTGACT----- mirR 18 5
-----CAGGACCATCAGTGTGACT----- mirR 19 4
-----AGGACCATCAGTGTGACTATT----- mirR 21 3
-----ACCAGGACCATCAGTGTGACTAT----- mirR 23 3
-----GGACCATCAGTGTGACTATT----- mirR 20 2
-----CAGGACCATCAGTGTGACTATT----- mirR 22 2
-----CAGGACCATCAGTGTGAC----- mirR 18 2
-----AACCAGGACCATCAGTGTGACTAT----- mirR 24 1
-----TAACCAGGACCATCAGTG----- mirR 18 1
-----TTGGATTGGGACTATCCAC morR 19 1
-----TTGGATTGGGACTATCCA- morR 18 1
```

>mmu-mir-703

```
AGACTGGTTAATGATAACAATGCATCATAAAACCTTCAGAAGGAAAGAATGTTGTGGACCATTTTTTTTGTGTGTGGCAGTTTAAAGTTATTAGTTTTCAAATCAGTACTTTTTAATGGAACAACCTTGACCAAAAATC
AGACTGGTTAATGATAACAATGCATCA-----
-----AAAACCTTCAGAAGGAAAGAA-----
-----AAAACCTTCAGAAGGAAAGA-----
-----AAAACCTTCAGAAGGAAAGAAT-----
-----AAAACCTTCAGAAGGAAAG-----
-----AAACCTTCAGAAGGAAAGAA-----
-----AACCTTCAGAAGGAAAGAA-----
-----ACCTTCAGAAGGAAAGAA-----
-----AAAACCTTCAGAAGGAAA-----
-----AACCTTCAGAAGGAAAGA-----
-----AAACCTTCAGAAGGAAAGA-----
-----AAAACCTTCAGAAGGAAAGAATG-----
-----AACCTTCAGAAGGAAAGAAT-----
-----AAACCTTCAGAAGGAAAGAAT-----
-----ACCTTCAGAAGGAAAGAAT-----
-----AAACCTTCAGAAGGAAAG-----
-----AAAACCTTCAGAAGGAAAGAATGT-----
-----ATAAACCTTCAGAAGGAAAGAA-----
-----CATAAAACCTTCAGAAGGAAAGAA-----
-----TAAAACCTTCAGAAGGAAAGA-----
-----AAACCTTCAGAAGGAAAGAATGTT-----
-----TAAAACCTTCAGAAGGAAAGAA-----
-----TC
-----TC
-----TC
-----C
-----C
```

>mmu-mir-490

```
TTGGAAAGTTCATTGTTTCGACACCATGGATCTCCAGGTGGGTACGTTTAGATATACCAACCTGGAGGACTCCATGCTGTTGAGCTGTTTACAAGCAG species len reads
```

```

---GAAAGTTCATTGTTTCGACACC----- morL 21 1
TTGGAAAGTTCATTGTTTCG----- morL 19 1
-----CCATGGATCTCCAGGTGGGT----- mirL 20 465
-----CCATGGATCTCCAGGTGGG----- mirL 19 320
-----CCATGGATCTCCAGGTGG----- mirL 18 129
-----CCATGGATCTCCAGGTGGGTCA----- mirL 22 116
-----CCATGGATCTCCAGGTGGGTC----- mirL 21 57
-----CCATGGATCTCCAGGTGGGTAC----- mirL 23 21
-----CATGGATCTCCAGGTGGG----- mirL 18 15
-----CATGGATCTCCAGGTGGGT----- mirL 19 13
-----CCATGGATCTCCAGGTGGGTCAAG----- mirL 24 9
-----ATGGATCTCCAGGTGGGT----- mirL 18 7
-----TGGATCTCCAGGTGGGTC----- mirL 18 1
-----CACCATGGATCTCCAGGTGGGT----- mirL 22 1
-----CACCATGGATCTCCAGGTGG----- mirL 20 1
-----TGGATCTCCAGGTGGGTCA----- mirL 19 1
-----CACCATGGATCTCCAGGT----- mirL 18 1
-----ACCATGGATCTCCAGGTGGG----- mirL 20 1
-----ATGGATCTCCAGGTGGGTC----- mirL 19 1
-----TCACGTTTAGATATACAC----- loop 18 2
-----CACGTTTAGATATACACC----- loop 18 1
-----TCACGTTTAGATATACACAA----- loop 21 1
-----CAACCTGGAGGACTCCATGCTG----- mirR 22 2560
-----CAACCTGGAGGACTCCATGCTGT----- mirR 23 408
-----CAACCTGGAGGACTCCATGC----- mirR 20 247
-----CAACCTGGAGGACTCCATGCT----- mirR 21 110
-----AACCTGGAGGACTCCATGCTG----- mirR 21 80
-----ACCTGGAGGACTCCATGCTG----- mirR 20 72
-----CAACCTGGAGGACTCCATGCTGTT----- mirR 24 37
-----CCTGGAGGACTCCATGCTG----- mirR 19 32
-----CAACCTGGAGGACTCCATG----- mirR 19 25
-----CCAACCTGGAGGACTCCATGCT----- mirR 22 15
-----CAACCTGGAGGACTCCAT----- mirR 18 15
-----CCAACCTGGAGGACTCCATGCTG----- mirR 23 11
-----CCAACCTGGAGGACTCCATGC----- mirR 21 10
-----AACCTGGAGGACTCCATGCTGT----- mirR 22 6
-----ACCTGGAGGACTCCATGCTGT----- mirR 21 4
-----CCAACCTGGAGGACTCCATGCTGT----- mirR 24 3
-----ACCAACCTGGAGGACTCCATGC----- mirR 22 2
-----AACCTGGAGGACTCCATG----- mirR 18 2
-----CACCAACCTGGAGGACTCCATGCT----- mirR 24 2
-----AACCTGGAGGACTCCATGCTGTT----- mirR 23 2
-----ACCTGGAGGACTCCATGC----- mirR 18 1
-----ACCAACCTGGAGGACTCC----- mirR 18 1
-----CACCAACCTGGAGGACTCCA----- mirR 20 1
-----CCTGGAGGACTCCATGCTGT----- mirR 20 1

```



C:\Documents and Settings\hong\Desktop\Hippocampus-total RNA.txt

```
-----ACCAACCTGGAGGACTCCAT----- mirR 20 1
-----ACCAACCTGGAGGACTCCATG----- mirR 21 1
-----ACCTGGAGGACTCCATGCT----- mirR 19 1
-----CCAACCTGGAGGACTCCATGCTGTT----- mirR 25 1
-----CACCAACCTGGAGGACTCCATGCTG----- mirR 25 1
-----TGAGCTGTTTACAAGCAG morR 18 4
```

>mmu-mir-467e

```
GCATAAGTGTGAGCATGTATATGTGTGTATATTTTATGCATATACATACACACACCTATATACACATGCACACAGACATG species len reads
--ATAAGTGTGAGCATGTATATGT----- mirL 22 2280
--ATAAGTGTGAGCATGTATAT----- mirL 20 585
--ATAAGTGTGAGCATGTATATG----- mirL 21 467
---TAAGTGTGAGCATGTATATGT----- mirL 21 298
---TAAGTGTGAGCATGTATATGTGT----- mirL 23 203
--ATAAGTGTGAGCATGTAT----- mirL 18 185
--ATAAGTGTGAGCATGTATATGT----- mirL 23 180
--ATAAGTGTGAGCATGTATA----- mirL 19 151
---TAAGTGTGAGCATGTATATGTG----- mirL 22 95
---AAGTGTGAGCATGTATATGT----- mirL 20 48
--ATAAGTGTGAGCATGTATATGTGT----- mirL 24 43
---TAAGTGTGAGCATGTATAT----- mirL 19 38
---TAAGTGTGAGCATGTATATG----- mirL 20 34
---TAAGTGTGAGCATGTATATGTGTG----- mirL 24 25
----AGTGTGAGCATGTATATGT----- mirL 19 24
---TAAGTGTGAGCATGTATATGTGTGT----- mirL 25 23
---AAGTGTGAGCATGTATAT----- mirL 18 19
---AAGTGTGAGCATGTATATG----- mirL 19 17
---AAGTGTGAGCATGTATATGTGT----- mirL 22 13
---AGTGTGAGCATGTATATG----- mirL 18 13
---AAGTGTGAGCATGTATATGTG----- mirL 21 4
---AAGTGTGAGCATGTATATGTGTG----- mirL 23 2
GCATAAGTGTGAGCATGTATAT----- mirL 22 1
-----ATATACATACACACCTATAT----- mirR 22 17
-----TATACATACACACCTATAT----- mirR 21 2
-----ATACATACACACCTATAT----- mirR 20 2
-----ATATACATACACACCTATATA----- mirR 23 1
-----ATACACATGCACACAGAC--- morR 18 3
-----TACACATGCACACAGACA-- morR 18 2
-----ATACACATGCACACAGACATG morR 21 1
-----ATACACATGCACACAGACA-- morR 19 1
```

>mmu-mir-293

```
GGAAATGCTTCAATCTGTGGTACTCAAAGTGTGACATTTTGTCTTTGTAAGAAGTGCCGAGAGTTTGTAGTGTGCGATTGAGAACTGCAGTT species len reads
---AATGCTTCAATCTGTGGTACT----- morL 21 1
GGAAATGCTTCAATCTGTG----- morL 19 1
---ATGCTTCAATCTGTGGTAC----- morL 19 1
```

```

--AAATGCTTCAATCTGTGG----- morL 18 1
-----ACTCAAACGTGTGACATTTTG----- mirL 22 988
-----ACTCAAACGTGTGACATTTT----- mirL 21 380
-----ACTCAAACGTGTGACATTT----- mirL 20 269
-----ACTCAAACGTGTGACATT----- mirL 19 210
-----ACTCAAACGTGTGACAT----- mirL 18 71
-----ACTCAAACGTGTGACATTTTGT----- mirL 23 44
-----CAAACGTGTGACATTTTG----- mirL 19 37
-----CTCAAACGTGTGACATTTTG----- mirL 21 21
-----CTCAAACGTGTGACATTT----- mirL 19 18
-----CTCAAACGTGTGACATTTT----- mirL 20 13
-----CAAACGTGTGACATTTT----- mirL 18 12
-----TCAAACGTGTGACATTT----- mirL 18 10
-----CTCAAACGTGTGACATT----- mirL 18 8
-----TCAAACGTGTGACATTTTG----- mirL 20 8
-----TCAAACGTGTGACATTTT----- mirL 19 4
-----CAAACGTGTGACATTTTGT----- mirL 20 1
-----AGTGCCGCAGAGTTTGTAGTGT----- mirR 22 1246
-----AGTGCCGCAGAGTTTGTAGTG----- mirR 21 480
-----AGTGCCGCAGAGTTTGTAG----- mirR 19 336
-----AGTGCCGCAGAGTTTGTAGTGTT----- mirR 23 266
-----AGTGCCGCAGAGTTTGTAGT----- mirR 20 85
-----AGTGCCGCAGAGTTTGTAGTGTTG----- mirR 24 47
-----GCCGCAGAGTTTGTAGTGT----- mirR 19 24
-----GCCGCAGAGTTTGTAGTG----- mirR 18 23
-----AGTGCCGCAGAGTTTGTAG----- mirR 18 22
-----GTGCCGCAGAGTTTGTAGTG----- mirR 20 19
-----TGCCGCAGAGTTTGTAGTG----- mirR 19 17
-----GTGCCGCAGAGTTTGTAGTGT----- mirR 21 14
-----TGCCGCAGAGTTTGTAGTGT----- mirR 20 14
-----GTGCCGCAGAGTTTGTAG----- mirR 18 8
-----TGCCGCAGAGTTTGTAGTGTT----- mirR 21 5
-----GCCGCAGAGTTTGTAGTGTT----- mirR 20 5
-----GTGCCGCAGAGTTTGTAGT----- mirR 19 4
-----TGCCGCAGAGTTTGTAGT----- mirR 18 3
-----AAGTGCCGCAGAGTTTGTAG----- mirR 20 2
-----GTGCCGCAGAGTTTGTAGTGTT----- mirR 22 2
-----TGCCGCAGAGTTTGTAGTGTGCC----- mirR 24 2
-----AAGTGCCGCAGAGTTTGTAGTGTT----- mirR 24 1
-----AAGTGCCGCAGAGTTTGTAGTGTG----- mirR 25 1
-----AGAAGTGCCGCAGAGTTT----- mirR 18 1
-----GCCGCAGAGTTTGTAGTGTGCC----- mirR 23 1
-----TGCCGCAGAGTTTGTAGTGTG----- mirR 22 1
-----AAGTGCCGCAGAGTTTGT----- mirR 18 1
-----CGATTGAGAACTGCAGTT morR 19 1
-----TGTGCCGATTGAGAAAC----- morR 18 1

```

>mmu-mir-302a

| Sequence                                                                                      | species | len | reads |
|-----------------------------------------------------------------------------------------------|---------|-----|-------|
| ACTGGGCTTCCCACCACTTAAACGTGGTTGTACTTGCTTTAGACCTAAGAAAGTAAGTGCTTCCATGTTTTGGTGATGGTATGTTTTCTTTAT | morL    | 18  | 2     |
| ACTGGGCTTCCCACCACT                                                                            | morL    | 18  | 1     |
| -CTGGGCTTCCCACCACTT                                                                           | mirL    | 22  | 1443  |
| -----TAAACGTGGTTGTACTTGCTTT-----                                                              | mirL    | 21  | 343   |
| -----TAAACGTGGTTGTACTTGCTT-----                                                               | mirL    | 21  | 250   |
| -----ACTTAAACGTGGTTGTACTTG-----                                                               | mirL    | 23  | 238   |
| -----ACTTAAACGTGGTTGTACTTGCT-----                                                             | mirL    | 20  | 236   |
| -----ACTTAAACGTGGTTGTACTT-----                                                                | mirL    | 21  | 233   |
| -----AAACGTGGTTGTACTTGCTTT-----                                                               | mirL    | 22  | 190   |
| -----ACTTAAACGTGGTTGTACTTGCT-----                                                             | mirL    | 20  | 174   |
| -----TAAACGTGGTTGTACTTGCT-----                                                                | mirL    | 19  | 163   |
| -----AAACGTGGTTGTACTTGCT-----                                                                 | mirL    | 18  | 138   |
| -----AACGTGGTTGTACTTGCT-----                                                                  | mirL    | 23  | 127   |
| -----TAAACGTGGTTGTACTTGCTTTA-----                                                             | mirL    | 18  | 111   |
| -----AAACGTGGTTGTACTTGCT-----                                                                 | mirL    | 19  | 72    |
| -----TAAACGTGGTTGTACTTGCT-----                                                                | mirL    | 20  | 66    |
| -----AAACGTGGTTGTACTTGCTTT-----                                                               | mirL    | 20  | 65    |
| -----AACGTGGTTGTACTTGCTTT-----                                                                | mirL    | 19  | 48    |
| -----ACGTGGTTGTACTTGCTTT-----                                                                 | mirL    | 21  | 41    |
| -----TTAAACGTGGTTGTACTTGCT-----                                                               | mirL    | 22  | 41    |
| -----CTTAAACGTGGTTGTACTTGCT-----                                                              | mirL    | 18  | 33    |
| -----TAAACGTGGTTGTACTTG-----                                                                  | mirL    | 19  | 26    |
| -----AACGTGGTTGTACTTGCTTT-----                                                                | mirL    | 19  | 23    |
| -----ACTTAAACGTGGTTGTACT-----                                                                 | mirL    | 20  | 18    |
| -----CTTAAACGTGGTTGTACTTG-----                                                                | mirL    | 20  | 16    |
| -----TTAAACGTGGTTGTACTTGCT-----                                                               | mirL    | 22  | 15    |
| -----AAACGTGGTTGTACTTGCTTTA-----                                                              | mirL    | 18  | 11    |
| -----ACGTGGTTGTACTTGCTTT-----                                                                 | mirL    | 18  | 10    |
| -----ACTTAAACGTGGTTGTACT-----                                                                 | mirL    | 18  | 10    |
| -----TTAAACGTGGTTGTACTTT-----                                                                 | mirL    | 19  | 8     |
| -----CTTAAACGTGGTTGTACTTT-----                                                                | mirL    | 19  | 7     |
| -----TTAAACGTGGTTGTACTTG-----                                                                 | mirL    | 21  | 6     |
| -----CTTAAACGTGGTTGTACTTGCT-----                                                              | mirL    | 21  | 5     |
| -----AACGTGGTTGTACTTGCTTTA-----                                                               | mirL    | 24  | 4     |
| -----ACTTAAACGTGGTTGTACTTGCTTT-----                                                           | mirL    | 20  | 3     |
| -----ACGTGGTTGTACTTGCTTTA-----                                                                | mirL    | 18  | 2     |
| -----CTTAAACGTGGTTGTACT-----                                                                  | mirL    | 23  | 1     |
| -----TTAAACGTGGTTGTACTTGCTTT-----                                                             | mirL    | 23  | 1     |
| -----CTTAAACGTGGTTGTACTTGCTTT-----                                                            | mirR    | 23  | 161   |
| -----TAAGTGCTTCCATGTTTTGGTGA-----                                                             | mirR    | 19  | 125   |
| -----TAAGTGCTTCCATGTTTTG-----                                                                 | mirR    | 22  | 82    |
| -----AAGTGCTTCCATGTTTTGGTGA-----                                                              | mirR    | 24  | 26    |
| -----TAAGTGCTTCCATGTTTTGGTGAT-----                                                            | mirR    | 21  | 26    |
| -----AGTGCTTCCATGTTTTGGTGA-----                                                               |         |     |       |

```

-----GTGCTTCCATGTTTTGGTGA----- mirR 20 25
-----AAGTGCTTCCATGTTTTG----- mirR 18 16
-----AAGTGCTTCCATGTTTTGGTGAT----- mirR 23 13
-----AGTGCTTCCATGTTTTGGTGAT----- mirR 22 10
-----TAAGTGCTTCCATGTTTTGGTG----- mirR 22 10
-----AAGTGCTTCCATGTTTTGGT----- mirR 20 6
-----GTGCTTCCATGTTTTGGTGAT----- mirR 21 6
-----AAGTGCTTCCATGTTTTGGTG----- mirR 21 5
-----TAAGTGCTTCCATGTTTTGGT----- mirR 21 5
-----TAAGTGCTTCCATGTTTTGG----- mirR 20 2
-----TAAGTGCTTCCATGTTTTGGTGATGG----- mirR 26 2
-----AGTGCTTCCATGTTTTGGTG----- mirR 20 1
-----AGTGCTTCCATGTTTTGG----- mirR 18 1
-----AAGTGCTTCCATGTTTTGGTGATG----- mirR 24 1
-----GTAAGTGCTTCCATGTTTTGG----- mirR 21 1
-----GTGCTTCCATGTTTTGGTG----- mirR 19 1
-----AGTGCTTCCATGTTTTGGT----- mirR 19 1
-----GTGCTTCCATGTTTTGGT----- mirR 18 1
-----GTAAGTGCTTCCATGTTTTG----- mirR 20 1
-----TGGTATGTTTTCCTTTAT morR 18 1

```

>mmu-mir-669h

```

TGTGATGCCCAACCAAAAATATGCATGGGTGTATAGTTGAGTGCATATTCATTTCTCTATATGAATATGCATATACACACATGCACACACACACACTCACACACAGGAAT species len reads
TGTGATGCCCAACCAAAA----- morL 18 1
-----ATGCATGGGTGTATAGTTGAGTGC----- mirL 24 2300
-----ATGCATGGGTGTATAGTTGAGTG----- mirL 23 852
-----ATGCATGGGTGTATAGTTGAGTGCA----- mirL 25 331
-----ATGCATGGGTGTATAGTTG----- mirL 19 247
-----ATGCATGGGTGTATAGTTGA----- mirL 20 231
-----ATGCATGGGTGTATAGTTGAG----- mirL 21 186
-----ATGCATGGGTGTATAGTTGAGT----- mirL 22 155
-----TATGCATGGGTGTATAGTTGAGTGC----- mirL 25 15
-----TATGCATGGGTGTATAGTTGAGTG----- mirL 24 9
-----TATGCATGGGTGTATAGTTGAG----- mirL 22 8
-----TGCATGGGTGTATAGTTGAGTGC----- mirL 23 6
-----CATGGGTGTATAGTTGAGTGC----- mirL 20 4
-----CATGGGTGTATAGTTGAGTGC----- mirL 21 4
-----GCATGGGTGTATAGTTGA----- mirL 18 4
-----GCATGGGTGTATAGTTGAGTG----- mirL 21 3
-----TATGCATGGGTGTATAGTTGAGT----- mirL 23 3
-----GCATGGGTGTATAGTTGAGTGC----- mirL 22 3
-----TGCATGGGTGTATAGTTGA----- mirL 19 2
-----TATGCATGGGTGTATAGTTGAGTGCAT----- mirL 27 2
-----TATGCATGGGTGTATAGTT----- mirL 19 2
-----TATGCATGGGTGTATAGTTGA----- mirL 21 2
-----GCATGGGTGTATAGTTGAG----- mirL 19 2

```

```

-----ATATGCATGGGTGTATAGTTGA----- mirL 22 1
-----AATATGCATGGGTGTATAGTT----- mirL 21 1
-----ATATGCATGGGTGTATAG----- mirL 18 1
-----AATATGCATGGGTGTATA----- mirL 18 1
-----TATGCATATACACACATGCACA----- mirR 22 101
-----TATGCATATACACACATGCAC----- mirR 21 31
-----ATGCATATACACACATGCACA----- mirR 21 12
-----TGCATATACACACATGCAC----- mirR 19 9
-----ATGCATATACACACATGCAC----- mirR 20 8
-----TGCATATACACACATGCACACA----- mirR 22 3
-----TGCATATACACACATGCACAC----- mirR 23 3
-----TGCATATACACACATGCACA----- mirR 20 3
-----ATGCATATACACACATGCACAC----- mirR 22 2
-----TATGCATATACACACATGCACAC----- mirR 23 2
-----TGCATATACACACATGCACAC----- mirR 21 2
-----GAATATGCATATACACACA----- mirR 19 1
-----GCATATACACACATGCAC----- mirR 18 1
-----GCATATACACACATGCACA----- mirR 19 1
-----CACACACACACTCACAC----- morR 19 9
-----CACACACACACTCACACA----- morR 20 7
-----ACACACACACACTCACAC----- morR 20 7
-----CACACACACTCACACAC----- morR 19 4
-----CACACACTCACACACA----- morR 18 4
-----ACACACACACACTCACACAC----- morR 22 4
-----CACACACACACTCACACAC----- morR 21 4
-----ACACACACACTCACAC----- morR 18 4
-----ACACACACACTCACACA----- morR 19 3
-----CACACACACTCACACACAG----- morR 21 3
-----ACACACACTCACACAC----- morR 18 3
-----ACACACACTCACACACA----- morR 19 2
-----ACACACACACTCACACAC----- morR 20 2
-----ACACACTCACACACAGGAA----- morR 21 1
-----CACACACTCACACACAGGAAT----- morR 23 1
-----CACACACACACTCACACACA----- morR 22 1
-----ACACACACACACTCACACA----- morR 21 1
-----ACACACTCACACACAG----- morR 18 1
-----CACACACACTCACACA----- morR 18 1
-----ACACACACACACTCACA----- morR 19 1
-----CACACACACTCACACACA----- morR 20 1
-----ACACACACACTCAC----- morR 18 1
-----ACACACACACTCACACAGG----- morR 25 1
-----CACACACTCACACACAGGAA----- morR 22 1

```

>mmu-mir-3099

```

CCTGCTGAACGATCGATCCCCATCCCAGCTTCCTTCCAGCCCTTGATGTTTTAGTACGCACATAGGCTAGAGAGAGGTTGGGGATGGGAAAGATGAGAGCA species len reads
-----GAACGATCGATCCCCATC----- morL 18 8

```

```
-----TGAACGATCGATCCCCATC----- morL 19 5
-----CTGAACGATCGATCCCCATC----- morL 20 3
-----CTGAACGATCGATCCCCATCC----- morL 21 3
-----CTGAACGATCGATCCCCA----- morL 18 2
-----CTGAACGATCGATCCCCAT----- morL 19 1
CCTGCTGAACGATCGATCCCCAT----- morL 23 1
-----CCAGCTTCCTTCCAGCCCTTG----- mirL 21 112
-----CCAGCTTCCTTCCAGCCCTTGA----- mirL 22 45
-----CCAGCTTCCTTCCAGCCCTT----- mirL 20 20
-----CCAGCTTCCTTCCAGCCCT----- mirL 19 6
-----CCAGCTTCCTTCCAGCCC----- mirL 18 3
-----CCCAGCTTCCTTCCAGCC----- mirL 18 1
-----TCCCAGCTTCCTTCCAGC----- mirL 18 1
-----AGCTTCCTTCCAGCCCTT----- mirL 18 1
-----GATGTTTTAGTACGCACA----- loop 18 1
-----TAGGCTAGAGAGAGGTTGG----- mirR 19 1097
-----TAGGCTAGAGAGAGGTTGGGG----- mirR 21 869
-----TAGGCTAGAGAGAGGTTGGGGAT----- mirR 23 781
-----TAGGCTAGAGAGAGGTTGGGGA----- mirR 22 726
-----TAGGCTAGAGAGAGGTTGGG----- mirR 20 542
-----TAGGCTAGAGAGAGGTTG----- mirR 18 206
-----TAGGCTAGAGAGAGGTTGGGGATG----- mirR 24 93
-----AGGCTAGAGAGAGGTTGG----- mirR 18 22
-----AGGCTAGAGAGAGGTTGGGGAT----- mirR 22 18
-----AGGCTAGAGAGAGGTTGGGGA----- mirR 21 17
-----AGGCTAGAGAGAGGTTGGGG----- mirR 20 15
-----AGGCTAGAGAGAGGTTGGG----- mirR 19 7
-----AGGCTAGAGAGAGGTTGGGGATG----- mirR 23 2
-----GCTAGAGAGAGGTTGGGGAT----- mirR 20 1
-----GGGATGGGGAAAGATGAG----- morR 18 1
-----ATGGGGAAAGATGAGAGC----- morR 18 1
-----GGGATGGGGAAAGATGAGAG----- morR 20 1
-----TGGGGATGGGGAAAGATGA----- morR 19 1
-----GATGGGGAAAGATGAGAGCA----- morR 20 1

>mmu-mir-511
ACAAGTAACCAAATAGATACCCACCATGCCTTTTGCTCTGCACTCAGTAAATAATAATTTGTGAATGTGTAGCAAAGACAGGATGGGGATCCATTAATCCCAAGGATGACGACGTAAGGTGTGGTGGTTGGCAGAGG s
ACAAGTAACCAAATAGATACCCACCA----- m
-----ACCAAATAGATACCCACC----- m
-----CCAAATAGATACCCACCA----- m
-----ATGCCTTTTGCTCTGCACTCA----- m
-----ATGCCTTTTGCTCTGCACTC----- m
-----ATGCCTTTTGCTCTGCACTCAG----- m
-----ATGCCTTTTGCTCTGCACT----- m
-----TGCCTTTTGCTCTGCACTCA----- m
-----ATGCCTTTTGCTCTGCAC----- m
```

```

-----CCTTTTGCTCTGCACTCA----- m
-----GCCTTTGGCTCTGCACTCA----- m
-----TGCCTTTGCTCTGCACTC----- m
-----GCCTTTGGCTCTGCACTC----- m
-----CATGCCTTTGGCTCTGCACTCA----- m
-----CCTTTTGGCTCTGCACTCAG----- m
-----TGCCTTTGCTCTGCACT----- m
-----CATGCCTTTGGCTCTGCACTC----- m
-----TGCCTTTGCTCTGCACTCAG----- m
-----ATGCCTTTGGCTCTGCACTCAGT----- m
-----GCCTTTGGCTCTGCACTCAG----- m
-----CATGCCTTTGGCTCTGCACT----- m
-----CATGCCTTTGGCTCTGCAC----- m
-----ACCATGCCTTTGGCTCTG----- m
-----CATGCCTTTGGCTCTGCA----- m
-----ATCCCAAGGATGACGACGT----- m
-----TCCCAAGGATGACGACGT----- m
-----ATCCCAAGGATGACGACG----- m
-----AATCCCAAGGATGACGAC----- m
-----AAATCCCAAGGATGACGAC----- m
-----CCAAGGATGACGACGTAA----- m
-----TAAGGTGTGGTGGTTGGCA----- m
-----GTGTGGTGGTTGGCAGAGG----- m
-----CGTAAGGTGTGGTGGTTGG----- m
-----CGTAAGGTGTGGTGGTTG----- m
-----GTGTGGTGGTTGGCAGAG----- m

```

>mmu-mir-188

| Sequence                                                                                          | species | len | reads |
|---------------------------------------------------------------------------------------------------|---------|-----|-------|
| CCCTTCCCTGCTCCCTCTCTCACATCCCTTGCATGGTGGAGGGTGCAGCTCTCTGAAAACCCCTCCACATGCAGGGTTGCAGGATGGTGGCTTCAGC | morL    | 19  | 5     |
| ---TCCCTGCTCCCTCTCTCAC---                                                                         | morL    | 20  | 3     |
| ---TCCCTGCTCCCTCTCTCACA---                                                                        | morL    | 19  | 3     |
| ---TCCCTGCTCCCTCTCTCA---                                                                          | morL    | 18  | 2     |
| --CTTCCCTGCTCCCTCTCT---                                                                           | morL    | 18  | 1     |
| -----CTGCTCCCTCTCTCACAT-----                                                                      | morL    | 18  | 1     |
| -----CTGCTCCCTCTCTCACAT-----                                                                      | morL    | 19  | 1     |
| --CTTCCCTGCTCCCTCTCTCAC---                                                                        | morL    | 21  | 1     |
| CCCTTCCCTGCTCCCTCTCTC                                                                             | morL    | 19  | 1     |
| -CCTTCCCTGCTCCCTCTCTCA-                                                                           | morL    | 21  | 1     |
| -CCTTCCCTGCTCCCTCTCTC-                                                                            | morL    | 20  | 1     |
| --CTTCCCTGCTCCCTCTCTC--                                                                           | morL    | 19  | 1     |
| -----CCCTGCTCCCTCTCTCAC-----                                                                      | morL    | 18  | 1     |
| -CCTTCCCTGCTCCCTCTC-                                                                              | morL    | 18  | 1     |
| -----CATCCCTTGCATGGTGGAGGGT-----                                                                  | mirL    | 22  | 835   |
| -----CATCCCTTGCATGGTGGAGGG-----                                                                   | mirL    | 21  | 723   |
| -----CATCCCTTGCATGGTGGAGGGT-----                                                                  | mirL    | 23  | 715   |

```
-----CATCCCTTGCATGGTGGAGG----- mirL 20 459
-----CATCCCTTGCATGGTGGAG----- mirL 19 258
-----CATCCCTTGCATGGTGGAGGGTGA----- mirL 24 215
-----CATCCCTTGCATGGTGGGA----- mirL 18 172
-----ATCCCTTGCATGGTGGAGGGT----- mirL 21 38
-----TCCCTTGCATGGTGGAGGG----- mirL 19 25
-----ATCCCTTGCATGGTGGAGGG----- mirL 20 16
-----CCCTTGCATGGTGGAGGG----- mirL 18 13
-----TCCCTTGCATGGTGGAGGGT----- mirL 20 11
-----TCCCTTGCATGGTGGAGGGTG----- mirL 21 11
-----ATCCCTTGCATGGTGGAGGGTG----- mirL 22 9
-----ATCCCTTGCATGGTGGAGG----- mirL 19 9
-----TCCCTTGCATGGTGGAGG----- mirL 18 6
-----ATCCCTTGCATGGTGGAG----- mirL 18 5
-----CCCTTGCATGGTGGAGGGTG----- mirL 20 5
-----CCCTTGCATGGTGGAGGGT----- mirL 19 4
-----ATCCCTTGCATGGTGGAGGGTGA----- mirL 23 3
-----CCCTTGCATGGTGGAGGGTGA----- mirL 21 2
-----TCCCTTGCATGGTGGAGGGTGA----- mirL 22 1
-----ACATCCCTTGCATGGTGG----- mirL 18 1
-----ACATCCCTTGCATGGTGGAGGGTG----- mirL 24 1
-----CCCTTGCATGGTGGAGGGTGAGC----- mirL 23 1
-----AGCTCTCTGAAAACCCCT----- loop 18 3
-----GTGAGCTCTCTGAAAACC----- loop 18 2
-----TGAGCTCTCTGAAAACCCC----- loop 19 2
-----TGAGCTCTCTGAAAACCCCTC----- loop 21 1
-----GCTCTCTGAAAACCCCTC----- loop 18 1
-----GAGCTCTCTGAAAACCCCT----- loop 19 1
-----CTCCACATGCAGGGTTTGC----- mirR 20 489
-----CTCCACATGCAGGGTTTG----- mirR 19 178
-----CTCCACATGCAGGGTTTGCA----- mirR 21 149
-----CTCCACATGCAGGGTTT----- mirR 18 52
-----CTCCACATGCAGGGTTTGAG----- mirR 22 39
-----CCTCCACATGCAGGGTTTGC----- mirR 21 16
-----TCCACATGCAGGGTTTGC----- mirR 19 11
-----CCTCCACATGCAGGGTTTG----- mirR 20 8
-----TCCACATGCAGGGTTTG----- mirR 18 4
-----CCTCCACATGCAGGGTTTGAG----- mirR 23 3
-----TCCACATGCAGGGTTTGAG----- mirR 21 3
-----CCCACATGCAGGGTTTGC----- mirR 18 3
-----CCCTCCACATGCAGGGT----- mirR 18 2
-----CTCCACATGCAGGGTTTGAG----- mirR 23 2
-----CCTCCACATGCAGGGTTTGCA----- mirR 22 2
-----CCCACATGCAGGGTTTGC----- mirR 19 2
-----CCACATGCAGGGTTTGCA----- mirR 18 1
-----CCTCCACATGCAGGGTTT----- mirR 19 1
```



```

-----CTCCCACATGCAGGGTTTGCAGGA----- mirR 24 1
-----TGCAGGATGGTGAGCTTCA-- morR 19 1
-----GCAGGATGGTGAGCTTCA-- morR 18 1
-----CAGGATGGTGAGCTTCAGC morR 19 1

```

>mmu-mir-217

| AGATACTGCATCAGGA | CTGACTGGATAAGACTT | TAATCCC       | CATCAGTT    | CCTAATGCATT | GCCTTCAGCATCTAAACA | ACCACCA | species | len | reads |
|------------------|-------------------|---------------|-------------|-------------|--------------------|---------|---------|-----|-------|
| ---              | TACTGCATCAGGA     | ACTGACTGGAT   | ---         | ---         | ---                | ---     | mirL    | 24  | 1456  |
| ---              | TACTGCATCAGGA     | ACTGACTG      | ---         | ---         | ---                | ---     | mirL    | 21  | 715   |
| ---              | TACTGCATCAGGA     | ACTGACTGG     | ---         | ---         | ---                | ---     | mirL    | 22  | 465   |
| ---              | TACTGCATCAGGA     | ACTGACT       | ---         | ---         | ---                | ---     | mirL    | 20  | 310   |
| ---              | TACTGCATCAGGA     | ACTGACTGGA    | ---         | ---         | ---                | ---     | mirL    | 23  | 304   |
| ---              | TACTGCATCAGGA     | ACTGACTGGATA  | ---         | ---         | ---                | ---     | mirL    | 25  | 211   |
| ---              | ACTGCATCAGGA      | ACTGACTGGAT   | ---         | ---         | ---                | ---     | mirL    | 23  | 139   |
| ---              | TACTGCATCAGGA     | ACTGACTGAC    | ---         | ---         | ---                | ---     | mirL    | 19  | 122   |
| ---              | ATACTGCATCAGGA    | ACTGACTGG     | ---         | ---         | ---                | ---     | mirL    | 23  | 80    |
| ---              | ACTGCATCAGGA      | ACTGACTG      | ---         | ---         | ---                | ---     | mirL    | 20  | 77    |
| ---              | CTGCATCAGGA       | ACTGACTGGAT   | ---         | ---         | ---                | ---     | mirL    | 22  | 66    |
| ---              | ACTGCATCAGGA      | ACTGACTGG     | ---         | ---         | ---                | ---     | mirL    | 21  | 61    |
| ---              | TGCATCAGGA        | ACTGACTGGAT   | ---         | ---         | ---                | ---     | mirL    | 21  | 56    |
| ---              | ACTGCATCAGGA      | ACTGACT       | ---         | ---         | ---                | ---     | mirL    | 19  | 50    |
| ---              | ACTGCATCAGGA      | ACTGACTGGA    | ---         | ---         | ---                | ---     | mirL    | 22  | 37    |
| ---              | ATACTGCATCAGGA    | ACTGACT       | ---         | ---         | ---                | ---     | mirL    | 21  | 31    |
| ---              | CTGCATCAGGA       | ACTGACTGG     | ---         | ---         | ---                | ---     | mirL    | 20  | 26    |
| ---              | CTGCATCAGGA       | ACTGACTG      | ---         | ---         | ---                | ---     | mirL    | 19  | 24    |
| ---              | TGCATCAGGA        | ACTGACTGG     | ---         | ---         | ---                | ---     | mirL    | 19  | 21    |
| ---              | CTGCATCAGGA       | ACTGACTGGA    | ---         | ---         | ---                | ---     | mirL    | 21  | 17    |
| ---              | CTGCATCAGGA       | ACTGACT       | ---         | ---         | ---                | ---     | mirL    | 18  | 16    |
| ---              | ACTGCATCAGGA      | ACTGACTGAC    | ---         | ---         | ---                | ---     | mirL    | 18  | 13    |
| ---              | ACTGCATCAGGA      | ACTGACTGGATA  | ---         | ---         | ---                | ---     | mirL    | 24  | 13    |
| ---              | ATACTGCATCAGGA    | ACTGACTGGA    | ---         | ---         | ---                | ---     | mirL    | 24  | 12    |
| ---              | TGCATCAGGA        | ACTGACTG      | ---         | ---         | ---                | ---     | mirL    | 18  | 12    |
| ---              | ATACTGCATCAGGA    | ACTGACTGAC    | ---         | ---         | ---                | ---     | mirL    | 20  | 8     |
| ---              | ATACTGCATCAGGA    | ACTGACTG      | ---         | ---         | ---                | ---     | mirL    | 22  | 8     |
| ---              | TGCATCAGGA        | ACTGACTGGA    | ---         | ---         | ---                | ---     | mirL    | 20  | 8     |
| ---              | ATACTGCATCAGGA    | ACTGACTGGAT   | ---         | ---         | ---                | ---     | mirL    | 25  | 7     |
| ---              | CTGCATCAGGA       | ACTGACTGGATA  | ---         | ---         | ---                | ---     | mirL    | 23  | 6     |
| ---              | TGCATCAGGA        | ACTGACTGGATA  | ---         | ---         | ---                | ---     | mirL    | 22  | 5     |
| ---              | CTGCATCAGGA       | ACTGACTGGATAA | ---         | ---         | ---                | ---     | mirL    | 24  | 5     |
| AGATACTGCATCAGGA | ACT               | ---           | ---         | ---         | ---                | ---     | mirL    | 19  | 1     |
| --               | ATACTGCATCAGGA    | ACTGA         | ---         | ---         | ---                | ---     | mirL    | 19  | 1     |
| ---              | ---               | ATCAGTT       | CCTAATGCATT | GCCT        | ---                | ---     | mirR    | 22  | 58    |
| ---              | ---               | CATCAGTT      | CCTAATGCATT | GCCT        | ---                | ---     | mirR    | 23  | 16    |
| ---              | ---               | CATCAGTT      | CCTAATGCATT | GCCTT       | ---                | ---     | mirR    | 24  | 6     |
| ---              | ---               | ATCAGTT       | CCTAATGCATT | GCCTT       | ---                | ---     | mirR    | 23  | 5     |
| ---              | ---               | ATCAGTT       | CCTAATGCATT | GCCTTC      | ---                | ---     | mirR    | 24  | 4     |

```

-----CATCAGTTCCTAATGCATTG----- mirR 20 4
-----CATCAGTTCCTAATGCATTGCCTTC----- mirR 25 3
-----ATCAGTTCCTAATGCATTGCC----- mirR 21 2
-----CATCAGTTCCTAATGCATTGCC----- mirR 22 2
-----CATCAGTTCCTAATGCATTGC----- mirR 21 2
-----ATCAGTTCCTAATGCATTGC----- mirR 20 2
-----CCCATCAGTTCCTAATGCATTGC----- mirR 23 1
-----ATCAGTTCCTAATGCATT----- mirR 18 1
-----CAGTTCCTAATGCATTGCCTT----- mirR 21 1
-----CCCATCAGTTCCTAATGCATTG----- mirR 22 1
-----CCCATCAGTTCCTAATGCATT----- mirR 21 1
-----ATCAGTTCCTAATGCATTGCCTTCA----- mirR 25 1
-----CAGCATCTAAACAACCACCA morR 20 1
-----TCAGCATCTAAACAACCAC-- morR 19 1
-----CTTCAGCATCTAAACAAC---- morR 18 1
-----CTTCAGCATCTAAACAACC---- morR 19 1
-----TCAGCATCTAAACAACCACCA morR 21 1
-----TCAGCATCTAAACAACCACCA-- morR 18 1
-----AGCATCTAAACAACCACC- morR 18 1

```

>mmu-mir-202

| Sequence                 | species | len | reads |
|--------------------------|---------|-----|-------|
| ATTCTCGCTGGCTGTTCC       | morL    | 18  | 2     |
| ATTCTCGCTGGCTGTTCC       | morL    | 19  | 1     |
| ATTCTCGCTGGCTGTTCC       | morL    | 22  | 1     |
| TTCTCGCTGGCTGTTCC        | morL    | 18  | 1     |
| TTCCATGTCATATACTTCTT     | mirL    | 20  | 1324  |
| TTCCATGTCATATACTTCTT     | mirL    | 21  | 536   |
| TTCCATGTCATATACTTCT      | mirL    | 19  | 319   |
| TCCTATGTCATATACTTCTT     | mirL    | 19  | 272   |
| TTCCATGTCATATACTTCTT     | mirL    | 22  | 119   |
| TTCCATGTCATATACTTCTTTG   | mirL    | 22  | 103   |
| TCCTATGTCATATACTTCTT     | mirL    | 20  | 101   |
| TTTCCTATGTCATATACTTCTT   | mirL    | 21  | 98    |
| TTCCATGTCATATACTTCT      | mirL    | 18  | 69    |
| TCCTATGTCATATACTTCT      | mirL    | 18  | 54    |
| TTTCCTATGTCATATACTTCTTTG | mirL    | 23  | 40    |
| CCTATGTCATATACTTCTT      | mirL    | 18  | 33    |
| TTTCCTATGTCATATACTTCT    | mirL    | 20  | 27    |
| TTCCATGTCATATACTTCTTTGT  | mirL    | 23  | 21    |
| TCCTATGTCATATACTTCTTTG   | mirL    | 21  | 18    |
| TTTCCTATGTCATATACTTCT    | mirL    | 19  | 14    |
| CTATGTCATATACTTCTTT      | mirL    | 18  | 14    |
| CCTATGTCATATACTTCTTT     | mirL    | 19  | 6     |
| CCTATGTCATATACTTCTTTG    | mirL    | 20  | 5     |
| TCCTATGTCATATACTTCTTTGT  | mirL    | 22  | 5     |

```

-----TTTCCTATGCATATACTTCTTTGT----- mirL 24 4
-----TTTCCTATGCATATACTT----- mirL 18 3
-----TTCCTATGCATATACTTCTTTGTGG----- mirL 25 2
-----CTATGCATATACTTCTTTG----- mirL 19 1
-----CTTTGTGGATCTGGTCTAAA----- loop 20 2
-----CTTTGTGGATCTGGTCTA----- loop 18 1
-----CTTTGTGGATCTGGTCTAA----- loop 19 1
-----AGAGGTATAGCGCATGGGAAGA----- mirR 22 458
-----AGAGGTATAGCGCATGGGAAG----- mirR 21 387
-----AGAGGTATAGCGCATGGGAAGAT----- mirR 23 113
-----AGAGGTATAGCGCATGGGAA----- mirR 20 89
-----AGAGGTATAGCGCATGGGA----- mirR 19 49
-----GGTATAGCGCATGGGAAG----- mirR 18 25
-----GGTATAGCGCATGGGAAGA----- mirR 19 21
-----AGAGGTATAGCGCATGGGAAGATG----- mirR 24 20
-----AGGTATAGCGCATGGGAAGA----- mirR 20 13
-----AGGTATAGCGCATGGGAAG----- mirR 19 13
-----GAGGTATAGCGCATGGGAAG----- mirR 20 11
-----GAGGTATAGCGCATGGGAAGA----- mirR 21 10
-----AGAGGTATAGCGCATGGG----- mirR 18 7
-----GGTATAGCGCATGGGAAGAT----- mirR 20 6
-----AGGTATAGCGCATGGGA----- mirR 18 6
-----AGGTATAGCGCATGGGAAGAT----- mirR 21 4
-----GAGGTATAGCGCATGGGAA----- mirR 19 4
-----GAGGTATAGCGCATGGGAAGAT----- mirR 22 2
-----AAGAGGTATAGCGCATGGGAAG----- mirR 22 2
-----GGTATAGCGCATGGGAAGATG----- mirR 21 1
-----GGTATAGCGCATGGGAAGATGG----- mirR 22 1
-----TGGAGCAGTGAGATCTTC morR 18 4
-----GATGGAGCAGTGAGATCTT- morR 19 2
-----GATGGAGCAGTGAGATCTTC morR 20 1
-----ATGGAGCAGTGAGATCTT- morR 18 1

>mmu-mir-215
GAATGACCTATGATTGACAGACCGTGCAGCTGTGTATGTCTGTCATTCTGTAGCCAATATTCTGTATGTCACTGCTACTTAAAATCCGGACATCGGCAAACACCTC species len reads
--ATGACCTATGATTGACAGA----- mirL 20 1366
--ATGACCTATGATTGACAGAC----- mirL 21 1241
--ATGACCTATGATTGACAG----- mirL 19 706
--ATGACCTATGATTGACA----- mirL 18 611
--ATGACCTATGATTGACAGACC----- mirL 22 318
--ATGACCTATGATTGACAGACCG----- mirL 23 38
--TGACCTATGATTGACAGAC----- mirL 20 25
--GACCTATGATTGACAGAC----- mirL 19 20
--TGACCTATGATTGACAG----- mirL 18 16
--TGACCTATGATTGACAGACC----- mirL 21 12
--TGACCTATGATTGACAGA----- mirL 19 11

```

```

-----ACCTATGATTTGACAGAC----- mirL 18 10
-----GACCTATGATTTGACAGACC----- mirL 20 8
-----GACCTATGATTTGACAGAG----- mirL 18 6
---TGACCTATGATTTGACAGACCG----- mirL 22 5
-AATGACCTATGATTTGACAG----- mirL 20 4
-AATGACCTATGATTTGACAGAC----- mirL 22 4
--ATGACCTATGATTTGACAGACCGT----- mirL 24 3
-----ACCTATGATTTGACAGACC----- mirL 19 3
-AATGACCTATGATTTGACAGAG----- mirL 21 3
-----GACCTATGATTTGACAGACCG----- mirL 21 2
-AATGACCTATGATTTGAC----- mirL 18 2
GAATGACCTATGATTTGA----- mirL 18 2
---TGACCTATGATTTGACAGACCGTG----- mirL 24 1
---TGACCTATGATTTGACAGACCGTGCAG----- mirL 27 1
---GACCTATGATTTGACAGACCGTG----- mirL 23 1
-----GTCACTGCTACTTAAAAAT----- mirR 18 2
-----CACTGCTACTTAAAAATCC----- mirR 18 1
-----TCACTGCTACTTAAAAATC----- mirR 18 1
-----TGTCACTGCTACTTAAAA----- mirR 18 1
-----TCCGGACATCGGCAAACA----- morR 18 1
-----CGGACATCGGCAAACACCC----- morR 19 1
-----GACATCGGCAAACACCCTC----- morR 19 1
-----ATCCGGACATCGGCAAAC----- morR 18 1
-----CCGGACATCGGCAAACAC----- morR 18 1
-----GACATCGGCAAACACCCT----- morR 18 1

```

>mmu-mir-294

```

AGCGAAATCCATATAGCCATACTCAAATGGAGGCCCTATCTAAGCTTTTAAGTGAAAGTGCTTCCCTTTTGTGTGTTGCCATGTGGAGAAAGC species len reads
AGCGAAATCCATATAGC----- morL 18 3
-----ACTCAAATGGAGGCCCTATCT----- mirL 22 1375
-----ACTCAAATGGAGGCCCTA----- mirL 19 562
-----ACTCAAATGGAGGCCCTAT----- mirL 20 410
-----CTCAAATGGAGGCCCTATCT----- mirL 21 346
-----ACTCAAATGGAGGCCCTATC----- mirL 21 339
-----CTCAAATGGAGGCCCTATC----- mirL 20 98
-----ACTCAAATGGAGGCCCT----- mirL 18 95
-----CTCAAATGGAGGCCCTAT----- mirL 19 88
-----TCAAATGGAGGCCCTATCT----- mirL 20 46
-----ACTCAAATGGAGGCCCTATCTA----- mirL 23 45
-----CAAATGGAGGCCCTATCT----- mirL 19 41
-----CTCAAATGGAGGCCCTA----- mirL 18 21
-----TCAAATGGAGGCCCTATC----- mirL 19 20
-----CTCAAATGGAGGCCCTATCTA----- mirL 22 20
-----TCAAATGGAGGCCCTAT----- mirL 18 18
-----CAAATGGAGGCCCTATC----- mirL 18 13
-----CTCAAATGGAGGCCCTATCTAA----- mirL 23 6

```

```

-----ACTCAAATGGAGGCCCTATCTAA----- mirL 24 4
-----TCAAATGGAGGCCCTATCTA----- mirL 21 2
-----TACTCAAATGGAGGCCCTATCT----- mirL 23 2
-----CTCAAATGGAGGCCCTATCTAAGC----- mirL 25 1
-----CAAATGGAGGCCCTATCTA----- mirL 20 1
-----ATACTCAAATGGAGGCCCT----- mirL 20 1
-----AAAGTGCTTCCCTTTTGTGTGT----- mirR 22 565
-----AAAGTGCTTCCCTTTTGTGTG----- mirR 21 68
-----AAAGTGCTTCCCTTTTGTGT----- mirR 20 46
-----AGTGCTTCCCTTTTGTGTGT----- mirR 20 35
-----AAAGTGCTTCCCTTTTGTGTGT----- mirR 23 25
-----AAGTGCTTCCCTTTTGTGTGT----- mirR 21 23
-----AAAGTGCTTCCCTTTTGT----- mirR 18 11
-----GTGCTTCCCTTTTGTGTGT----- mirR 19 11
-----AAAGTGCTTCCCTTTTGTG----- mirR 19 9
-----AAAGTGCTTCCCTTTTGTGTGTG----- mirR 25 8
-----AGTGCTTCCCTTTTGTGTG----- mirR 19 5
-----AGTGCTTCCCTTTTGTGT----- mirR 18 5
-----GAAAGTGCTTCCCTTTTGT----- mirR 18 4
-----AGTGCTTCCCTTTTGTGTGT----- mirR 21 2
-----AAGTGCTTCCCTTTTGTGT----- mirR 19 2
-----GTGCTTCCCTTTTGTGTG----- mirR 18 2
-----AAGTGCTTCCCTTTTGTG----- mirR 18 2
-----TGGAAAGTGCTTCCCTTTTGT----- mirR 20 1
-----GGAAAGTGCTTCCCTTTTGTGT----- mirR 24 1
-----TGGAAAGTGCTTCCCTTTT----- mirR 19 1
-----AAGTGCTTCCCTTTTGTGTG----- mirR 20 1
-----GAAAGTGCTTCCCTTTTGTGT----- mirR 21 1
-----GTGCTTCCCTTTTGTGTGTG----- mirR 22 1
-----GGAAAGTGCTTCCCTTTT----- mirR 18 1
-----TGGAAAGTGCTTCCCTTTTGTGTG----- mirR 24 1
-----GTTGCCATGTGGAGAAAG----- morR 18 1
-----TTGCCATGTGGAGAAAG----- morR 18 1

>mmu-mir-343
TGTGGCACCTCTGTGTACCTGGGATAGAGTGGGTGTGGCGGGGGTAGCAGAGCCCAGGGCAACCTCTCCCTTCATGTGCCAGATCCTGCATGCCAACGTGGTGG species len reads
-----ACCTCTGTGTACCTGGGA----- morL 18 1
-----TGGCACCTCTGTGTACCTG----- morL 19 1
-----CACCTCTGTGTACCTGGGA----- morL 19 1
TGTGGCACCTCTGTGTACC----- morL 19 1
-----GGATAGAGTGGGTGTGGC----- mirL 18 1
-----TCTCCCTTCATGTGCCAGA----- mirR 20 2258
-----TCTCCCTTCATGTGCCAG----- mirR 19 1434
-----TCTCCCTTCATGTGCCA----- mirR 18 261
-----TCTCCCTTCATGTGCCAGAT----- mirR 21 184
-----CTCCCTTCATGTGCCAGA----- mirR 19 81

```

```

-----CTCCCTTCATGTGCCAG----- mirR 18 63
-----TCCCTTCATGTGCCAG----- mirR 18 45
-----TCTCCCTTCATGTGCCAGATC----- mirR 22 23
-----CTCCCTTCATGTGCCAGAT----- mirR 20 14
-----CTCTCCCTTCATGTGCC----- mirR 18 3
-----CCCTTCATGTGCCAGAT----- mirR 18 2
-----TCTCCCTTCATGTGCCAGATCCT----- mirR 24 1
-----CCTCTCCCTTCATGTGCC----- mirR 19 1
-----TCCCTTCATGTGCCAGATC----- mirR 20 1
-----TCCCTTCATGTGCCAGAT----- mirR 19 1
-----TCTCCCTTCATGTGCCAGATCC----- mirR 23 1
-----CTCTCCCTTCATGTGCCAGA----- mirR 21 1
-----TCCTGCATGCCAACGTGG--- morr 18 2
-----TGCATGCCAACGTGGTGG morr 18 1

```

>mmu-mir-290

```

GTACTCAAACATATGGGGGCACTTTTTTTTTCTTTAAAAAGTGCCGCCTAGTTTTTAAGCCCCGCCGGTTGAGAAAAC species len reads
--ACTCAAACATATGGGGGCACTTT----- mirL 22 1715
--ACTCAAACATATGGGGGCACT----- mirL 20 553
--ACTCAAACATATGGGGGCACT----- mirL 21 247
---CTCAAACATATGGGGGCACTTTTT----- mirL 23 233
--ACTCAAACATATGGGGGCACTTTT----- mirL 23 133
--ACTCAAACATATGGGGGCA----- mirL 18 84
---CTCAAACATATGGGGGCACTTT----- mirL 21 77
---CTCAAACATATGGGGGCACTTT----- mirL 22 71
--ACTCAAACATATGGGGGCA----- mirL 19 64
---CTCAAACATATGGGGGCACTT----- mirL 20 28
---CTCAAACATATGGGGGCACT----- mirL 19 26
----CAAACATATGGGGGCACTTT----- mirL 19 20
----TCAAACATATGGGGGCACTTT----- mirL 20 14
--ACTCAAACATATGGGGGCACTTTTT----- mirL 24 8
----CAAACATATGGGGGCACTTT----- mirL 18 6
-TACTCAAACATATGGGGGCACTTT----- mirL 23 5
---CTCAAACATATGGGGGCA----- mirL 18 5
----TCAAACATATGGGGGCACT----- mirL 18 5
----CAAACATATGGGGGCACTTTT----- mirL 20 5
----TCAAACATATGGGGGCACTT----- mirL 19 5
---CTCAAACATATGGGGGCACTTTTT----- mirL 24 5
----TCAAACATATGGGGGCACTTTT----- mirL 21 3
----CAAACATATGGGGGCACTTTTT----- mirL 21 1
GTACTCAAACATATGGGGGCACTT----- mirL 23 1
-TACTCAAACATATGGGGGCA----- mirL 18 1
----TCAAACATATGGGGGCACTTTTT----- mirL 22 1
-----AAAGTGCCGCCTAGTTTTTAAGCCC----- mirR 24 598
-----AAAGTGCCGCCTAGTTTTTAAGCCCC----- mirR 25 157
-----AAAGTGCCGCCTAGTTTTTAAGCCC----- mirR 23 55

```

```

-----AGTGCCGCCTAGTTTTAAGCCC----- mirR 22 46
-----GTGCCGCCTAGTTTTAAGCCC----- mirR 21 37
-----AAGTGCCGCCTAGTTTTAAGCCC----- mirR 23 37
-----AAAGTGCCGCCTAGTTTT----- mirR 18 15
-----AGTGCCGCCTAGTTTTAAGCCCC----- mirR 23 14
-----AAAGTGCCGCCTAGTTTTAAGCCCCG----- mirR 26 11
-----GTGCCGCCTAGTTTTAAGCCCC----- mirR 22 9
-----AAAGTGCCGCCTAGTTTTAAG----- mirR 21 8
-----AAAGTGCCGCCTAGTTTTA----- mirR 19 8
-----GTGCCGCCTAGTTTTAAG----- mirR 18 7
-----AAGTGCCGCCTAGTTTTA----- mirR 18 6
-----GTGCCGCCTAGTTTTAAGCC----- mirR 20 6
-----AAGTGCCGCCTAGTTTTAAGCC----- mirR 22 6
-----AGTGCCGCCTAGTTTTAAGCC----- mirR 21 4
-----AGTGCCGCCTAGTTTTAA----- mirR 18 3
-----AAGTGCCGCCTAGTTTTAAGCCCC----- mirR 24 3
-----AAAAGTGCCGCCTAGTTT----- mirR 18 1
-----AGTGCCGCCTAGTTTTAAGCCCCG----- mirR 24 1
-----AAAAGTGCCGCCTAGTTTTAAGCCC----- mirR 25 1
-----AAGTGCCGCCTAGTTTTAAG----- mirR 20 1
-----GTGCCGCCTAGTTTTAAGCCCCG----- mirR 23 1
-----AGTGCCGCCTAGTTTTAAG----- mirR 19 1
-----AAAAGTGCCGCCTAGTTTTAAGCC----- mirR 24 1
-----CCCGCCGGTTGAGAAAA----- morR 18 2
-----CCCGCCGGTTGAGAAAAC----- morR 18 1

>mmu-mir-291b
TGGAACATACAGTGTTCGATCAAAGTGGAGGCCCTCTCCGCGGCTTGCGGGAAAGTGCATCCATTTTGTGTTGTCTCTGTGTGTACATGGCGTCTGA species len reads
TGGAACATACAGTGTTCGA----- morL 18 1
-----GATCAAAGTGGAGGCCCTCTC----- mirL 21 1959
-----GATCAAAGTGGAGGCCCTCTCC----- mirL 22 407
-----GATCAAAGTGGAGGCCCTCT----- mirL 20 371
-----GATCAAAGTGGAGGCCCTC----- mirL 19 207
-----GATCAAAGTGGAGGCCCT----- mirL 18 87
-----GATCAAAGTGGAGGCCCTCTCCG----- mirL 23 40
-----CAAAGTGGAGGCCCTCTCC----- mirL 19 6
-----GATCAAAGTGGAGGCCCTCTCCGC----- mirL 24 6
-----TCAAAGTGGAGGCCCTCTCCG----- mirL 21 4
-----ATCAAAGTGGAGGCCCTCTCC----- mirL 21 3
-----TCAAAGTGGAGGCCCTCTCC----- mirL 20 2
-----TCGATCAAAGTGGAGGCC----- mirL 19 1
-----AAAGTGCATCCATTTTGTGTTGT----- mirR 22 589
-----AAAGTGCATCCATTTTGTGTTG----- mirR 21 204
-----AGTGCATCCATTTTGTGTTGT----- mirR 20 156
-----AAGTGCATCCATTTTGTGTTGT----- mirR 21 65
-----GTGCATCCATTTTGTGTTGT----- mirR 19 47

```

```

-----AAAGTGCATCCATTTGTTT----- mirR 20 45
-----AAAGTGCATCCATTTGTTTGTC----- mirR 23 35
-----AAGTGCATCCATTTGTTTG----- mirR 20 17
-----AGTGCATCCATTTGTTTG----- mirR 19 13
-----AAAGTGCATCCATTTGT----- mirR 18 12
-----AGTGCATCCATTTGTTTGTC----- mirR 21 12
-----AAAGTGCATCCATTTGTT----- mirR 19 9
-----AGTGCATCCATTTGTTT----- mirR 18 9
-----AAAGTGCATCCATTTGTTTGTC----- mirR 25 7
-----GTGCATCCATTTGTTTGTC----- mirR 20 6
-----GTGCATCCATTTGTTTG----- mirR 18 4
-----AAGTGCATCCATTTGTTT----- mirR 19 4
-----AGTGCATCCATTTGTTTGTC----- mirR 22 4
-----GAAAGTGCATCCATTTGTTTGTC----- mirR 23 3
-----AGTGCATCCATTTGTTTGTC----- mirR 23 2
-----AAGTGCATCCATTTGTTTGTC----- mirR 22 2
-----GTGCATCCATTTGTTTGTC----- mirR 21 2
-----AAGTGCATCCATTTGTT----- mirR 18 2
-----AAGTGCATCCATTTGTTTGTC----- mirR 23 1
-----AGTGCATCCATTTGTTTGTCCTG----- mirR 25 1
-----AAGTGCATCCATTTGTTTGTCCTG----- mirR 26 1
-----TCTGTGTGTACATGGCGTC----- morR 19 2
-----TCTGTGTGTACATGGCGT----- morR 18 2
-----TCTGTGTGTACATGGC----- morR 18 2
-----CTGTGTGTACATGGCGTCTGA morR 21 1
-----TGTCTGTGTGTACATG----- morR 18 1
-----CTGTGTGTACATGGCGTC----- morR 18 1

```

>mmu-mir-18b

```

CTCCTTGTAATGTGTCTCTTGTGTTAAGGTGCATCTAGTGCTGTTAGTGAAGCAGCTTACAATCTACTGCCCTAAATGCCCTTCTCGACA species len reads
CTCCTTGTAATGTGTCTCTTG----- morL 21 6
-----GTAATGTGTCTCTTGTGTT----- morL 19 3
-----TAATGTGTCTCTTGTGTT----- morL 18 2
-----TTGTAATGTGTCTCTTGTGTT----- morL 20 2
-----TGTAATGTGTCTCTTGTG----- morL 18 1
-----TGTAATGTGTCTCTTGTGTT----- morL 20 1
-----TGTAATGTGTCTCTTGTGTT----- morL 19 1
-----TAAGGTGCATCTAGTGCTGTTA----- mirL 22 335
-----TAAGGTGCATCTAGTGCTGT----- mirL 20 156
-----TAAGGTGCATCTAGTGCTGTT----- mirL 21 114
-----TAAGGTGCATCTAGTGCTGTTAG----- mirL 23 94
-----TAAGGTGCATCTAGTGCTG----- mirL 19 67
-----TAAGGTGCATCTAGTGCT----- mirL 18 63
-----AAGGTGCATCTAGTGCTGTTA----- mirL 21 56
-----AAGGTGCATCTAGTGCTGTTAG----- mirL 22 18
-----GGTGCATCTAGTGCTGTTA----- mirL 19 16

```



```
-----AGGTGCATCTAGTGCTGTTA----- mirL 20 13
-----AAGGTGCATCTAGTGCTG----- mirL 18 13
-----GGTGCATCTAGTGCTGTTAG----- mirL 20 12
-----AGGTGCATCTAGTGCTGT----- mirL 18 11
-----AAGGTGCATCTAGTGCTGTT----- mirL 20 11
-----AAGGTGCATCTAGTGCTGT----- mirL 19 9
-----GGTGCATCTAGTGCTGTT----- mirL 18 5
-----TAAGGTGCATCTAGTGCTGTTAGTGAAG----- mirL 29 4
-----AGGTGCATCTAGTGCTGTT----- mirL 19 3
-----AGGTGCATCTAGTGCTGTTAG----- mirL 21 3
-----AAGGTGCATCTAGTGCTGTTAGT----- mirL 23 1
-----GGTGCATCTAGTGCTGTTAGTGAAG----- mirL 25 1
-----AAGCAGCTTACAATCTACTGC----- loop 21 2380
-----AAGCAGCTTACAATCTACTG----- loop 20 61
-----AAGCAGCTTACAATCTAC----- loop 18 1
-----TGCCCTAAATGCCCTTCTC----- mirR 20 274
-----TGCCCTAAATGCCCTTCTC----- mirR 18 197
-----TGCCCTAAATGCCCTTCT----- mirR 19 176
-----TGCCCTAAATGCCCTTCTCGC----- mirR 22 48
-----TGCCCTAAATGCCCTTCTCG----- mirR 21 40
-----TGCCCTAAATGCCCTTCTCGCA----- mirR 23 26
-----GCCCTAAATGCCCTTCT----- mirR 18 8
-----GCCCTAAATGCCCTTCTC----- mirR 19 5
-----ACTGCCCTAAATGCCCTTCT----- mirR 21 3
-----ACTGCCCTAAATGCCCT----- mirR 18 3
-----CCCTAAATGCCCTTCTCGC----- mirR 20 2
-----TACTGCCCTAAATGCCCTTCTC----- mirR 23 2
-----GCCCTAAATGCCCTTCTCG----- mirR 20 2
-----CCCTAAATGCCCTTCTC----- mirR 18 2
-----ACTGCCCTAAATGCCCTTCTC----- mirR 22 2
-----GCCCTAAATGCCCTTCTCGC----- mirR 21 1
-----ACTGCCCTAAATGCCCTTCTCGCACA----- mirR 27 1
-----ACTGCCCTAAATGCCCTT----- mirR 19 1
-----TACTGCCCTAAATGCCCTTCT----- mirR 22 1
-----TACTGCCCTAAATGCCCTT----- mirR 20 1
```

>mmu-mir-449c

```
TGTGGGTGTGTCAGGCAGGCAGTGCAATTGCTAGCTGGCTGTTAGAACTTATCCCAACAGTTGCTAGCTGCACTACCCTCTGCTGCACTCAGAAGCATGCAAAGACGTGGAAATAGTGCCATCTGGTGGATAAGGAGGTGT
TGTGGGTGTGTCAGGCAG-----
```

```
-----AGGCAGTGCATTGCTAGCTG-----
-----AGGCAGTGCATTGCTAGCTGG-----
-----AGGCAGTGCATTGCTAGCT-----
-----AGGCAGTGCATTGCTAGC-----
-----AGGCAGTGCATTGCTAGCTGGC-----
-----GGCAGTGCATTGCTAGCTG-----
-----AGGCAGTGCATTGCTAGCTGGCTG-----
```

```

-----AGGCAGTGCATTGCTAGCTGGCT-----
-----GCAGTGCATTGCTAGCTG-----
-----GGCAGTGCATTGCTAGCTGG-----
-----CAGTGCATTGCTAGCTGG-----
-----CAGGCAGTGCATTGCTAGCTG-----
-----GCAGTGCATTGCTAGCTGG-----
-----GGCAGTGCATTGCTAGCT-----
-----CAGGCAGTGCATTGCTAGCTGGC-----
-----GGCAGGCAGTGCATTGCTAGCTG-----
-----CAGGCAGTGCATTGCTAGCT-----
-----TAGTGCCATCTGGTGGATA-----
-----AATAGTGCCATCTGGTGG-----
-----AGTGCCATCTGGTGGATAAGG-----
-----ATAGTGCCATCTGGTGGAT-----
-----AGGAGGTGT-----

```

>mmu-mir-200c

| Sequence                                                                                            | species | len | reads |
|-----------------------------------------------------------------------------------------------------|---------|-----|-------|
| TGAAGGTGGACTGGTTGGGTAGGGGCCCTCGTCTTACCCAGCAGTGTGGTGGTGGGAGTCTCTAATACTGCCGGGTAATGATGGAGGCCCTGTCCCAGT | morL    | 18  | 1     |
| -----GGTTGGGTAGGGGCCCTC-----                                                                        | morL    | 20  | 1     |
| -----TGGACTGGTTGGGTAGGGGC-----                                                                      | morL    | 29  | 1     |
| TGAAGGTGGACTGGTTGGGTAGGGGCCCT                                                                       | morL    | 19  | 1     |
| -----TGGTTGGGTAGGGGCCCTC-----                                                                       | mirL    | 21  | 532   |
| -----CGTCTTACCCAGCAGTGTGGT-----                                                                     | mirL    | 20  | 299   |
| -----CGTCTTACCCAGCAGTGT-----                                                                        | mirL    | 18  | 123   |
| -----CGTCTTACCCAGCAGTGT-----                                                                        | mirL    | 19  | 104   |
| -----CGTCTTACCCAGCAGTGTGG-----                                                                      | mirL    | 22  | 88    |
| -----TCTTACCCAGCAGTGTGG-----                                                                        | mirL    | 19  | 38    |
| -----CTTACCCAGCAGTGTGG-----                                                                         | mirL    | 18  | 19    |
| -----TCTTACCCAGCAGTGTGG-----                                                                        | mirL    | 18  | 7     |
| -----GTCTTACCCAGCAGTGTGG-----                                                                       | mirL    | 19  | 7     |
| -----GTCTTACCCAGCAGTGTGG-----                                                                       | mirL    | 18  | 6     |
| -----CGTCTTACCCAGCAGTGTGGG-----                                                                     | mirL    | 23  | 3     |
| -----GTCTTACCCAGCAGTGTGG-----                                                                       | mirL    | 20  | 3     |
| -----CCTCGTCTTACCCAGCAG-----                                                                        | mirL    | 18  | 3     |
| -----CTTACCCAGCAGTGTGGG-----                                                                        | mirL    | 22  | 1     |
| -----CTTACCCAGCAGTGTGG-----                                                                         | mirL    | 19  | 1     |
| -----TCGTCTTACCCAGCAGTGTGG-----                                                                     | mirL    | 21  | 1     |
| -----CGTCTTACCCAGCAGTGTGGG-----                                                                     | mirL    | 24  | 1     |
| -----GGTGTCTGGTGGGAGTCT-----                                                                        | loop    | 18  | 2     |
| -----AATACTGCCGGGTAATGATG-----                                                                      | mirR    | 20  | 831   |
| -----TAATACTGCCGGGTAATGATG-----                                                                     | mirR    | 21  | 656   |
| -----AATACTGCCGGGTAATGA-----                                                                        | mirR    | 18  | 319   |
| -----TAATACTGCCGGGTAATGA-----                                                                       | mirR    | 19  | 226   |
| -----TAATACTGCCGGGTAATGATGGA-----                                                                   | mirR    | 23  | 148   |
| -----TAATACTGCCGGGTAATGATGG-----                                                                    | mirR    | 22  | 140   |

```

-----TAATACTGCCGGGTAATGAT----- mirR 20 131
-----AATACTGCCGGGTAATGATGG----- mirR 21 99
-----TAATACTGCCGGGTAATG----- mirR 18 65
-----AATACTGCCGGGTAATGAT----- mirR 19 65
-----AATACTGCCGGGTAATGATGGA----- mirR 22 54
-----ATACTGCCGGGTAATGATG----- mirR 19 45
-----TAATACTGCCGGGTAATGATGGAG----- mirR 24 22
-----CTAATACTGCCGGGTAATGAT----- mirR 21 16
-----AATACTGCCGGGTAATGATGGAG----- mirR 23 13
-----CTAATACTGCCGGGTAATGATG----- mirR 22 12
-----ACTGCCGGGTAATGATGGA----- mirR 19 6
-----CTAATACTGCCGGGTAATGA----- mirR 20 5
-----CTAATACTGCCGGGTAATG----- mirR 19 4
-----TACTGCCGGGTAATGATGG----- mirR 19 4
-----TACTGCCGGGTAATGATG----- mirR 18 3
-----AATACTGCCGGGTAATGATGGAG----- mirR 24 3
-----ATACTGCCGGGTAATGAT----- mirR 18 3
-----TACTGCCGGGTAATGATGGA----- mirR 20 2
-----ACTGCCGGGTAATGATGG----- mirR 18 2
-----CTAATACTGCCGGGTAATGATGG----- mirR 23 2
-----ATACTGCCGGGTAATGATGG----- mirR 20 1
-----TACTGCCGGGTAATGATGGAG----- mirR 21 1
-----ATACTGCCGGGTAATGATGGA----- mirR 21 1
-----TGGAGGCCCTGTCCCAG----- morR 18 2
-----TGGAGGCCCTGTCCCAGT----- morR 19 1

```

>mmu-mir-302c

```

GAGTCTGATGGGAGTCCCCTCTGCTTTAACATGGGGTTACCTGCTGTGTAAACAAAAGCAAGTGCTTCCATGTTTCAGTGGGGTGTCTTAACTGTTCAACAT species len reads
----CTGATGGGAGTCCCCTCT----- morL 18 1
----GATGGGAGTCCCCTCTGCT----- morL 19 1
GAGTCTGATGGGAGTCCCC----- morL 19 1
-AGTCTGATGGGAGTCCCCT----- morL 19 1
----TGATGGGAGTCCCCTCTG----- morL 18 1
-----GCTTTAACATGGGGTTACCTGC----- mirL 22 903
-----TTTAACATGGGGTTACCTGCT----- mirL 21 572
-----TTTAACATGGGGTTACCTGCTG----- mirL 22 497
-----GCTTTAACATGGGGTTACCTGCT----- mirL 23 352
-----TTTAACATGGGGTTACCTGC----- mirL 20 295
-----GCTTTAACATGGGGTTACCTG----- mirL 21 160
-----TTAACATGGGGTTACCTGCT----- mirL 20 101
-----TTAACATGGGGTTACCTGCTG----- mirL 21 82
-----TTAACATGGGGTTACCTGC----- mirL 19 81
-----TTTAACATGGGGTTACCTG----- mirL 19 44
-----GCTTTAACATGGGGTTAC----- mirL 18 37
-----TTTAACATGGGGTTACCTGCTGT----- mirL 23 37
-----GCTTTAACATGGGGTTACCT----- mirL 20 30

```

```

-----TTTAACATGGGGTTACCT----- mirL 18 26
-----GCTTTAACATGGGGTTACC----- mirL 19 19
-----TTAACATGGGGTTACCTG----- mirL 18 15
-----GCTTTAACATGGGGTTACCTGCTG----- mirL 24 9
-----CTTTAACATGGGGTTACCTGC----- mirL 21 8
-----CTTTAACATGGGGTTACCTG----- mirL 20 4
-----TGCTTTAACATGGGGTTACCTGC----- mirL 23 4
-----CTTTAACATGGGGTTACCTGCTG----- mirL 23 2
-----TGCTTTAACATGGGGTTA----- mirL 18 2
-----TTTAACATGGGGTTACCTGCTGTGTTA----- mirL 27 2
-----CTTTAACATGGGGTTACCTGCT----- mirL 22 2
-----TTAACATGGGGTTACCTGCTGT----- mirL 22 2
-----TCTGCTTTAACATGGGGT----- mirL 18 1
-----CTTTAACATGGGGTTACCT----- mirL 19 1
-----GCTGTGTAAACAAAAGC----- loop 18 1
-----TGCTGTGTAAACAAAAGC----- loop 19 1
-----CAAGTGCTTCCATGTTTCAGTGG----- mirR 23 194
-----CAAGTGCTTCCATGTTTCAGTG----- mirR 22 181
-----CAAGTGCTTCCATGTTTCAGTGGG----- mirR 24 88
-----AAGTGCTTCCATGTTTCA----- mirR 18 82
-----CAAGTGCTTCCATGTTTCA----- mirR 19 42
-----AAGTGCTTCCATGTTTCAGTGG----- mirR 22 42
-----CAAGTGCTTCCATGTTTCAGTGGGG----- mirR 25 30
-----AAGTGCTTCCATGTTTCAG----- mirR 19 24
-----AAGTGCTTCCATGTTTCAGTG----- mirR 21 24
-----AAGTGCTTCCATGTTTCAGT----- mirR 20 21
-----CAAGTGCTTCCATGTTTCAGTGGGGT----- mirR 27 18
-----CAAGTGCTTCCATGTTTCAGT----- mirR 21 17
-----AGTGCTTCCAIGTTTCAGTGG----- mirR 21 11
-----GTGCTTCCATGTTTCAGTGG----- mirR 20 5
-----AGTGCTTCCAIGTTTCAGT----- mirR 19 4
-----AGTGCTTCCAIGTTTCAGTG----- mirR 20 3
-----AGTGCTTCCAIGTTTCAG----- mirR 18 3
-----AGTGCTTCCATGTTTCAGTGGG----- mirR 22 2
-----AAGTGCTTCCATGTTTCAGTGGGG----- mirR 24 2
-----GTGCTTCCATGTTTCAGT----- mirR 18 2
-----GTGCTTCCAIGTTTCAGTG----- mirR 19 2
-----AGCAAGTGCTTCCATGTTTC----- mirR 20 1
-----AGTGCTTCCAIGTTTCAGTGGGG----- mirR 23 1
-----AGTGCTTCCATGTTTCAGTGGGGGTGT----- mirR 27 1
-----AAGTGCTTCCATGTTTCAGTGGG----- mirR 23 1
-----GTGCTTCCATGTTTCAGTGGG----- mirR 21 1
-----TGGGGGTGTCTTAAACTG----- morR 18 1
-----TGTCTTAAACTGTTCAACAT----- morR 20 1
-----GGGTGTCTTAAACTGTTTC----- morR 18 1

```

```

>mmu-mir-196a-2
TTAGGTAGTTTCATGTTGTTGGGATTGAGTTTGAACCTCGGCAACAAGAACTGCCTGAGTTACATCAGTCGGTTTTTCGT species len reads
-TAGGTAGTTTCATGTTGTTGGG----- mirL 22 734
-TAGGTAGTTTCATGTTGTT----- mirL 19 534
-TAGGTAGTTTCATGTTGTTG----- mirL 20 413
-TAGGTAGTTTCATGTTGT----- mirL 18 384
-TAGGTAGTTTCATGTTGTTGG----- mirL 21 192
--GGTAGTTTCATGTTGTTGGG----- mirL 20 77
--AGGTAGTTTCATGTTGTTGGG----- mirL 21 59
---GTAGTTTCATGTTGTTGGG----- mirL 19 54
--AGGTAGTTTCATGTTGTT----- mirL 18 48
--AGGTAGTTTCATGTTGTTG----- mirL 19 28
---GGTAGTTTCATGTTGTTG----- mirL 18 23
--AGGTAGTTTCATGTTGTTGG----- mirL 20 14
TTAGGTAGTTTCATGTTG----- mirL 18 7
-TAGGTAGTTTCATGTTGTTGGGA----- mirL 23 6
---GGTAGTTTCATGTTGTTGG----- mirL 19 6
-TAGGTAGTTTCATGTTGTTGGGATT----- mirL 25 5
---GTAGTTTCATGTTGTTGG----- mirL 18 2
--AGGTAGTTTCATGTTGTTGGGA----- mirL 22 2
---GGTAGTTTCATGTTGTTGGGATT----- mirL 23 2
TTAGGTAGTTTCATGTTGT----- mirL 19 2
---GGTAGTTTCATGTTGTTGGGA----- mirL 21 2
---GTAGTTTCATGTTGTTGGGATT----- mirL 22 1
-----GGATTGAGTTTGAACCT----- loop 18 2
-----GGGATTGAGTTTGAACCT----- loop 19 1
-----TCGGCAACAAGAACTGCCTGA----- mirR 22 477
-----CGGCAACAAGAACTGCCTGAG----- mirR 22 340
-----CGGCAACAAGAACTGCCTGA----- mirR 21 251
-----GCAACAAGAACTGCCTGA----- mirR 19 141
-----GGCAACAAGAACTGCCTGA----- mirR 20 50
-----TCGGCAACAAGAACTGCCTGAG----- mirR 23 37
-----GCAACAAGAACTGCCTGAG----- mirR 20 27
-----TCGGCAACAAGAACTGC----- mirR 18 27
-----TCGGCAACAAGAACTGCCTG----- mirR 21 17
-----CGGCAACAAGAACTGCCTGAGT----- mirR 23 13
-----CGGCAACAAGAACTGCCT----- mirR 19 13
-----CGGCAACAAGAACTGCCTG----- mirR 20 12
-----CGGCAACAAGAACTGCC----- mirR 18 11
-----TCGGCAACAAGAACTGCCT----- mirR 20 8
-----TCGGCAACAAGAACTGCC----- mirR 19 7
-----GGCAACAAGAACTGCCTGAG----- mirR 21 7
-----GCAACAAGAACTGCCTG----- mirR 18 6
-----GCAACAAGAACTGCCTGAGT----- mirR 21 5
-----CTCGGCAACAAGAACTG----- mirR 18 2
-----GGCAACAAGAACTGCCT----- mirR 18 2

```

```

-----GGCAACAAGAAACTGCCTG----- mirR 19 2
-----TCGGCAACAAGAAACTGCCTGAGT----- mirR 24 1
-----CGGCAACAAGAAACTGCCTGAGTT----- mirR 24 1
-----AACTCGGCAACAAGAAACT----- mirR 19 1
-----ACTCGGCAACAAGAAACTG----- mirR 19 1
-----AACTCGGCAACAAGAAAC----- mirR 18 1
-----CTCGGCAACAAGAAACTGCC----- mirR 20 1
-----ACATCAGTCGGTTTTTCGT morR 18 2
-----AGTTACATCAGTCGGTTTT-- morR 19 1
-----AGTTACATCAGTCGGTTT-- morR 18 1

>mmu-mir-1981
GGGTGTTGAGCTGTCCCAGGTAAAGGCTGGGCTTAGACGTGGCCTTTGGGTGTGGAATGCACTTCCGTTTGTAAACCGCCATCTAACCCCTGGCCTTTGACAGGTGCGTTCTGACTACAGTGGA species len read
GGGTGTTGAGCTGTCCA----- morL 18 1
---TGTTGAGCTGTCCCAGGT----- morL 18 1
-----GTAAAGGCTGGGCTTAGACGTG----- mirL 22 959
-----GTAAAGGCTGGGCTTAGACGT----- mirL 21 619
-----GTAAAGGCTGGGCTTAGACGTGG----- mirL 23 585
-----GTAAAGGCTGGGCTTAGACGTGGC----- mirL 24 403
-----GTAAAGGCTGGGCTTAGACGTGGCC----- mirL 25 153
-----GTAAAGGCTGGGCTTAGAC----- mirL 19 153
-----GTAAAGGCTGGGCTTAGACG----- mirL 20 78
-----AAAGGCTGGGCTTAGACGTG----- mirL 20 5
-----AAAGGCTGGGCTTAGACGTGG----- mirL 21 3
-----AAGGCTGGGCTTAGACGTGGC----- mirL 21 3
-----AAAGGCTGGGCTTAGACGTGGC----- mirL 22 3
-----GGTAAAGGCTGGGCTTAGACGTGG----- mirL 24 2
-----TAAAGGCTGGGCTTAGACGTGGC----- mirL 23 2
-----AAGGCTGGGCTTAGACGTG----- mirL 19 2
-----AAGGCTGGGCTTAGACGTGGCCT----- mirL 23 1
-----AAAGGCTGGGCTTAGACG----- mirL 18 1
-----CAGGTAAAGGCTGGGCTT----- mirL 18 1
-----TAAAGGCTGGGCTTAGACGTG----- mirL 21 1
-----GGTAAAGGCTGGGCTTAGACGT----- mirL 22 1
-----AAGGCTGGGCTTAGACGTGG----- mirL 20 1
-----AAGGCTGGGCTTAGACGTGGCC----- mirL 22 1
-----GGTAAAGGCTGGGCTTAGACGTGGCC----- mirL 26 1
-----AGGTAAAGGCTGGGCTTAGACGTGGCC----- mirL 27 1
-----AAAGGCTGGGCTTAGACGT----- mirL 19 1
-----CATCTAACCCCTGGCCTTTGACA----- mirR 22 397
-----CATCTAACCCCTGGCCTTTGACAG----- mirR 23 216
-----CATCTAACCCCTGGCCTTTGAC----- mirR 21 120
-----CATCTAACCCCTGGCCTTTGA----- mirR 20 118
-----CATCTAACCCCTGGCCTTTGACAGG----- mirR 24 60
-----CATCTAACCCCTGGCCTTTG----- mirR 19 22
-----ATCTAACCCCTGGCCTTTGACAGG----- mirR 23 20

```

```

-----CATCTAACCCCTGGCCTTT----- mirR 18 14
-----ATCTAACCCCTGGCCTTTGACAG----- mirR 22 13
-----ATCTAACCCCTGGCCTTTGAC----- mirR 20 10
-----ATCTAACCCCTGGCCTTTGACA----- mirR 21 5
-----ATCTAACCCCTGGCCTTTGA----- mirR 19 4
-----ATCTAACCCCTGGCCTTTGACAGGT----- mirR 24 1
-----ATCTAACCCCTGGCCTTTG----- mirR 18 1
-----TCTAACCCCTGGCCTTTGACA----- mirR 20 1
-----CCATCTAACCCCTGGCCTT----- mirR 18 1
-----CCATCTAACCCCTGGCCTTTGAC----- mirR 22 1
-----ACAGGTGCGTTCTGACTA----- morR 18 2
-----GCGTTCTGACTACAGTGGA morR 19 1

```

>mmu-mir-327

```

GGTTTGATGCCCTTATAACTTGAGGGGCATGAGGATAGTCAGTAGTCCAACATCCCTCTTGATGGCACATTGCACATA species len reads
GGTTTGATGCCCTTATAA----- morL 18 1
-----ACTTGAGGGGCATGAGGAT----- mirL 19 3022
-----ACTTGAGGGGCATGAGGA----- mirL 18 380
-----ACTTGAGGGGCATGAGGATA----- mirL 20 319
-----CTTGAGGGGCATGAGGAT----- mirL 18 89
-----ACTTGAGGGGCATGAGGATAG----- mirL 21 20
-----CTTGAGGGGCATGAGGATA----- mirL 19 6
-----AACTTGAGGGGCATGAGG----- mirL 18 3
-----CTTGAGGGGCATGAGGATAG----- mirL 20 2
-----AACTTGAGGGGCATGAGGAT----- mirL 20 2
-----TTGAGGGGCATGAGGATA----- mirL 18 1
-----ACTTGAGGGGCATGAGGATAGTCA----- mirL 24 1
-----ACTTGAGGGGCATGAGGATAGT----- mirL 22 1
-----GTCCAACATCCCTCTTGA----- mirR 18 2
-----TCCAACATCCCTCTTGATGG----- mirR 20 1
-----CAACATCCCTCTTGATGG----- mirR 19 1
-----TGATGGCACATTGCACATA morR 19 1
-----TGATGGCACATTGCACAT- morR 18 1

```

>mmu-mir-695

```

AACTTCACGAGGAATCCTAGATTGGGCATAGGTGACTGAAGTACACAGCTGCCTTTCTTACAAAGGCACTGGTTACCTTGGTCCTGGTCACCGGCTCGGCTATCTGCTACTCGGTGGAACACCCCCAGCAATCTCACTGTC
AACTTCACGAGGAATCCTAG-----
AACTTCACGAGGAATCCTA-----
-----AGATTGGGCATAGGTGACTGA-----
-----AGATTGGGCATAGGTGACTGAA-----
-----AGATTGGGCATAGGTGACTGAAG-----
-----AGATTGGGCATAGGTGACTG-----
-----AGATTGGGCATAGGTGACT-----
-----GATTGGGCATAGGTGACTGAA-----
-----AGATTGGGCATAGGTGAC-----
-----AGATTGGGCATAGGTGACTGAAGT-----

```

```

-----GATTGGGCATAGGTGACTGA-----
-----GATTGGGCATAGGTGACTG-----
-----ATTGGGCATAGGTGACTGA-----
-----ATTGGGCATAGGTGACTGAAG-----
-----TTGGGCATAGGTGACTGA-----
-----GATTGGGCATAGGTGACTGAAG-----
-----TAGATTGGGCATAGGTGACTG-----
-----CTAGATTGGGCATAGGTG-----
-----TTGGGCATAGGTGACTGAA-----
-----ATTGGGCATAGGTGACTG-----
-----GCAATCTCACTGTC
-----GCAATCTCACTGTC
-----AGCAATCTCACTGTC

```

>mmu-mir-883b

| Species | len | reads |
|---------|-----|-------|
| morL    | 19  | 2     |
| morL    | 18  | 1     |
| morL    | 19  | 1     |
| mirL    | 22  | 1428  |
| mirL    | 23  | 225   |
| mirL    | 21  | 172   |
| mirL    | 20  | 155   |
| mirL    | 21  | 137   |
| mirL    | 19  | 105   |
| mirL    | 18  | 71    |
| mirL    | 20  | 67    |
| mirL    | 19  | 59    |
| mirL    | 24  | 40    |
| mirL    | 22  | 28    |
| mirL    | 20  | 14    |
| mirL    | 19  | 12    |
| mirL    | 21  | 8     |
| mirL    | 20  | 6     |
| mirL    | 19  | 6     |
| mirL    | 18  | 6     |
| mirL    | 18  | 4     |
| mirL    | 18  | 3     |
| mirL    | 25  | 2     |
| mirL    | 24  | 1     |
| mirL    | 21  | 1     |
| mirL    | 19  | 1     |
| mirL    | 18  | 1     |
| mirL    | 22  | 1     |
| loop    | 18  | 1     |
| mirR    | 22  | 353   |



```

-----TAACTGCAACATCTCTCA----- mirR 18 264
-----CTGCAACATCTCTCAGTAT-- mirR 19 151
-----AACTGCAACATCTCTCAGTAT-- mirR 21 92
-----TAACTGCAACATCTCTCAGTA-- mirR 21 63
-----ACTGCAACATCTCTCAGTAT-- mirR 20 43
-----TAACTGCAACATCTCTCAG---- mirR 19 42
-----TAACTGCAACATCTCTCAGT--- mirR 20 26
-----CTGCAACATCTCTCAGTA--- mirR 18 20
-----TAACTGCAACATCTCTCAGTATT- mirR 23 15
-----AACTGCAACATCTCTCAGTA--- mirR 20 9
-----AACTGCAACATCTCTCAG---- mirR 18 7
-----ACTGCAACATCTCTCAGTA--- mirR 19 6
-----ACTGCAACATCTCTCAGTATT- mirR 21 4
-----TAACTGCAACATCTCTCAGTATTG mirR 24 3
-----AACTGCAACATCTCTCAGT--- mirR 19 3
-----CTGCAACATCTCTCAGTATT- mirR 20 3
-----CTGCAACATCTCTCAGTATTG mirR 21 2
-----AACTGCAACATCTCTCAGTATT- mirR 22 2
-----ACTGCAACATCTCTCAGT--- mirR 18 2
-----GAGTAACTGCAACATCTC----- mirR 18 2
-----GTAACTGCAACATCTCTCA----- mirR 19 1

```

>mmu-mir-1192

| Sequence                                                                              | Species | Len | Reads |
|---------------------------------------------------------------------------------------|---------|-----|-------|
| TCCTTCCAAACAGTAAAAACAAACAAACAGACCAAATTTGTCATGTGTTTCGATTGCTCTTTTTGTTTGTGCTTTTGTGTTTTGA | species | len | reads |
| ----TCCAAACAGTAAAAACAA                                                                | morL    | 18  | 2     |
| -CCTTCCAAACAGTAAAAACAA                                                                | morL    | 21  | 1     |
| ----CCAAACAGTAAAAACAAA                                                                | morL    | 18  | 1     |
| --TTCCAAACAGTAAAAACA                                                                  | morL    | 18  | 1     |
| -CCTTCCAAACAGTAAAAA                                                                   | morL    | 18  | 1     |
| TCCTTCCAAACAGTAAAAAC                                                                  | morL    | 20  | 1     |
| TCCTTCCAAACAGTAAAAA                                                                   | morL    | 19  | 1     |
| -----AAACAAACAAACAGACCAAATT                                                           | mirL    | 22  | 1251  |
| -----AAACAAACAAACAGACCAA                                                              | mirL    | 20  | 913   |
| -----AAACAAACAAACAGACCAAAT                                                            | mirL    | 21  | 393   |
| -----AAACAAACAAACAGACCAA                                                              | mirL    | 19  | 384   |
| -----AAACAAACAAACAGACCAAATTT                                                          | mirL    | 23  | 276   |
| -----AAACAAACAAACAGACCA                                                               | mirL    | 18  | 126   |
| -----AACAAACAAACAGACCAAATT                                                            | mirL    | 21  | 55    |
| -----AACAAACAAACAGACCAA                                                               | mirL    | 19  | 47    |
| -----AACAAACAAACAGACCAA                                                               | mirL    | 18  | 37    |
| -----ACAAACAAACAGACCAA                                                                | mirL    | 18  | 25    |
| -----ACAAACAAACAGACCAAAT                                                              | mirL    | 20  | 23    |
| -----AACAAACAAACAGACCAAAT                                                             | mirL    | 20  | 22    |
| -----AAACAAACAAACAGACCAAATTTGTC                                                       | mirL    | 26  | 17    |
| -----CAAACAAACAGACCAAATT                                                              | mirL    | 19  | 16    |
| -----CAAACAAACAGACCAAAT                                                               | mirL    | 18  | 9     |

```

-----CAAACAAACAAACAGACCA----- mirL 19 6
-----AACAAACAAACAGACCAAATTT----- mirL 22 6
-----ACAAACAAACAGACCAAAT----- mirL 19 4
-----ACAAACAAACAAACAGAC----- mirL 18 4
-----AACAAACAAACAAACAGA----- mirL 18 3
-----ACAAACAAACAAACAGACC----- mirL 19 2
-----AACAAACAAACAGACCAAATTTG----- mirL 23 2
-----AACAAACAAACAAACAGAC----- mirL 19 2
-----AACAAACAAACAGACCAAATTTGTC----- mirL 25 2
-----CAAACAAACAAACAGACC----- mirL 18 1
-----ACAAACAAACAGACCAAATTT----- mirL 21 1
-----ACAAACAAACAGACCAAATTTG----- mirL 22 1
-----CAAACAAACAGACCAAATTT----- mirL 20 1
-----ACAAACAAACAAACAGACCA----- mirL 20 1
-----AACAAACAAACAAACAGACC----- mirL 20 1
-----CAAACAAACAAACAGACCAA----- mirL 21 1
-----CAAACAAACAAACAGACCAAATT----- mirL 23 1
-----TCGATTGCTCTTTTTG----- mirR 18 16
-----GATTGCTCTTTTTGTT----- mirR 18 1
-----TCGATTGCTCTTTTTGTTG----- mirR 21 1
-----GTTTCGATTGCTCTTTTTGTT----- mirR 22 1
-----TGTTTGTTGCTTTTGTG----- morR 18 2
-----TTTGTGCTTTTGTGTT----- morR 18 2
-----TGTTTGTTGCTTTTGTGTT----- morR 19 1
-----TTGTTGCTTTTGTGTTTGA----- morR 21 1
-----TGTTGCTTTTGTGTTTGG----- morR 19 1
-----GTTTGCTTTTGTGTTTGA----- morR 19 1

```

>mmu-mir-1950

```

CCCGCCAAATGCTTTTTCTGCATCTAAGGATATGGTCATTTAATTGTTTTTTCCATGATCATCTCCTTAAATGCAGAAAAAGCAGCCAGTTTTCTGCCTTCATTTTC species len reads
--CGGCCAAATGCTTTTTCT----- morL 18 1
CCCGCCAAATGCTTTTT----- morL 18 1
-----TCTGCATCTAAGGATATGGTCA----- mirL 22 2251
-----TCTGCATCTAAGGATATGGTC----- mirL 21 467
-----TCTGCATCTAAGGATATGGTCAT----- mirL 23 347
-----TCTGCATCTAAGGATATG----- mirL 18 188
-----CTGCATCTAAGGATATGGTCA----- mirL 21 75
-----TCTGCATCTAAGGATATGGT----- mirL 20 55
-----TGCATCTAAGGATATGGTCA----- mirL 20 38
-----GCATCTAAGGATATGGTCA----- mirL 19 33
-----TCTGCATCTAAGGATATGG----- mirL 19 25
-----TCTGCATCTAAGGATATGGTCATT----- mirL 24 19
-----CTGCATCTAAGGATATGGTCAT----- mirL 22 15
-----CTGCATCTAAGGATATGGTC----- mirL 20 15
-----TGCATCTAAGGATATGGTC----- mirL 19 9
-----GCATCTAAGGATATGGTC----- mirL 18 9

```

```

-----TGCATCTAAGGATATGGTCAT----- mirL 21 8
-----CTGCATCTAAGGATATGGT----- mirL 19 3
-----TTCTGCATCTAAGGATATGGTCA----- mirL 23 3
-----GCATCTAAGGATATGGTCAT----- mirL 20 2
-----TTTTCTGCATCTAAGGAT----- mirL 18 1
-----CTGCATCTAAGGATATGG----- mirL 18 1
-----TGCATCTAAGGATATGGT----- mirL 18 1
-----GCATCTAAGGATATGGTCATT----- mirL 21 1
-----TTCTGCATCTAAGGATATGGTC----- mirL 22 1
-----TCCTTAAATGCAGAAAAA----- mirR 18 3
-----CCTTAAATGCAGAAAAAGC----- mirR 19 1
-----CTCCTTAAATGCAGAAAA----- mirR 18 1
-----CCTTAAATGCAGAAAAAG----- mirR 18 1
-----AAGCAGCCAGTTTTCTGC----- morR 18 2
-----AGCCAGTTTTCTGCTTCATTTTC morR 23 1
-----CAGCCAGTTTTCTGCTTC----- morR 18 1
-----GCAGCCAGTTTTCTGCTT----- morR 18 1

```

>mmu-mir-468

```

ACTGATAAGAACTTGGCGTGTCGTGACTGATGTACTGATAAGAACTCAGTGTGATATGACTGATGTGCGTGTGTCTGTCTGGGAGGACACACGTGGGG species len reads
ACTGATAAGAACTTGGC----- morL 18 5
-----ATAAGAACTTGGCGTGTC----- morL 19 1
-----TAAGAACTTGGCGTGTC----- morL 18 1
-----TCGTGACTGATGTACTGATA----- mirL 20 2
-----TATGACTGATGTGCGTGTGTCTG----- mirR 23 1380
-----TATGACTGATGTGCGTGTGTCT----- mirR 22 962
-----TATGACTGATGTGCGTGTGTCTGT----- mirR 24 406
-----ATGACTGATGTGCGTGTGTCTG----- mirR 22 164
-----ATGACTGATGTGCGTGTGTCT----- mirR 21 122
-----TATGACTGATGTGCGTGTGTCT----- mirR 21 120
-----TATGACTGATGTGCGTGTGT----- mirR 20 53
-----TGACTGATGTGCGTGTGTCTG----- mirR 21 51
-----GACTGATGTGCGTGTGTCTG----- mirR 20 41
-----ATGACTGATGTGCGTGTGTCTGT----- mirR 23 41
-----GACTGATGTGCGTGTGTCT----- mirR 19 34
-----TATGACTGATGTGCGTGTGTCTGTC----- mirR 25 31
-----TGACTGATGTGCGTGTGTCT----- mirR 20 30
-----TATGACTGATGTGCGTGTG----- mirR 19 25
-----TGACTGATGTGCGTGTGTCTGT----- mirR 22 13
-----ATGACTGATGTGCGTGTGTCT----- mirR 20 11
-----GACTGATGTGCGTGTGTCTGT----- mirR 21 10
-----ATGACTGATGTGCGTGTGT----- mirR 19 9
-----GATATGACTGATGTGCGT----- mirR 18 5
-----TGACTGATGTGCGTGTGTCT----- mirR 19 5
-----ATGACTGATGTGCGTGTGTCTGTC----- mirR 24 3
-----ATGACTGATGTGCGTGTG----- mirR 18 2

```

```

-----TGACTGATGTGCGTGTGT----- mirR 18 2
-----ATATGACTGATGTGCGTGTGTCTG----- mirR 24 1
-----ATATGACTGATGTGCGTGTGTCTGT----- mirR 25 1
-----CTGTCTGGGAGGACACAC----- morR 18 5
-----CTGGGAGGACACACGTGG-- morR 18 1
-----TCTGGGAGGACACACGTGGGG morR 21 1
-----GGGAGGACACACGTGGGG morR 18 1

>mmu-mir-540
TGGGACATCCCTGGGGCTGGGCCAAGGGTCACCCTCTGACTCTGTGGCCAAGGGTAGACAGGTCAGAGGTCGATCCTGGGCCTACTCTGGGGCTCCTC species len reads
TGGGACATCCCTGGGGCTGG-- morL 21 1
--GGACATCCCTGGGGCTG-- morL 18 1
-----CAAGGGTCACCCTCTGACTCTGT----- mirL 23 387
-----CAAGGGTCACCCTCTGACT----- mirL 19 51
-----CAAGGGTCACCCTCTGACTCT----- mirL 21 47
-----CAAGGGTCACCCTCTGACTCTG----- mirL 22 33
-----CAAGGGTCACCCTCTGACTC----- mirL 20 30
-----CAAGGGTCACCCTCTGACTCTGTG----- mirL 24 17
-----CAAGGGTCACCCTCTGACTCTGTGG----- mirL 25 9
-----GGGTCACCCTCTGACTCTGT----- mirL 20 9
-----AAGGGTCACCCTCTGACTCTGT----- mirL 22 8
-----AAGGGTCACCCTCTGACTCTGTGG----- mirL 24 3
-----AGGGTCACCCTCTGACTCTGT----- mirL 21 2
-----GGGTCACCCTCTGACTCTG----- mirL 19 1
-----AAGGGTCACCCTCTGACT----- mirL 18 1
-----AGGGTCACCCTCTGACTC----- mirL 18 1
-----GGCCAAGGGTCACCCTCTGA----- mirL 20 1
-----AGGTCAGAGGTCGATCCTGG----- mirR 20 1508
-----AGGTCAGAGGTCGATCCTGGGC----- mirR 22 433
-----AGGTCAGAGGTCGATCCTGGG----- mirR 21 298
-----AGGTCAGAGGTCGATCCTG----- mirR 19 257
-----AGGTCAGAGGTCGATCCTGGGC----- mirR 23 158
-----GTCAGAGGTCGATCCTGG----- mirR 18 68
-----AGGTCAGAGGTCGATCCT----- mirR 18 58
-----GGTCAGAGGTCGATCCTGG----- mirR 19 52
-----AGGTCAGAGGTCGATCCTGGGCCT----- mirR 24 51
-----GTCAGAGGTCGATCCTGGG----- mirR 19 16
-----GGTCAGAGGTCGATCCTGGG----- mirR 20 11
-----GGTCAGAGGTCGATCCTG----- mirR 18 5
-----CAGGTCAGAGGTCGATCCTGG----- mirR 21 3
-----CAGGTCAGAGGTCGATCCTG----- mirR 20 2
-----GGTCAGAGGTCGATCCTGGGC----- mirR 21 2
-----CAGGTCAGAGGTCGATCCTGGGC----- mirR 23 1
-----TCAGAGGTCGATCCTGGG----- mirR 18 1
-----GGTCAGAGGTCGATCCTGGGCC----- mirR 22 1
-----GTCAGAGGTCGATCCTGGGCC----- mirR 21 1

```

```

-----CAGGTCAGAGGTCGATCCTGGG----- mirR 22 1
-----TCAGAGGTCGATCCTGGGC----- mirR 19 1
-----CCTACTCTGGGGCTCCTC morR 18 1
-----GGCCTACTCTGGGGCTCCTC morR 20 1

>mmu-mir-758
TGTGATACACGTGTGGGTGCGTGAGGTGGTTGACCAGAGAGCACACGCTATATTTGTGCCGTTTGTGACCTGGTCCACTAACCCCTCAGTATCTAACCTT species len reads
-----ACGTGTGGGTGCGTGAGGT----- morL 19 1
TGTGATACACGTGTGGGTGCGTG----- morL 23 1
-----TGGTTGACCAGAGAGCACA----- mirL 19 8
-----TGGTTGACCAGAGAGCAC----- mirL 18 6
-----TGGTTGACCAGAGAGCACACG----- mirL 21 3
-----TGGTTGACCAGAGAGCACACGC----- mirL 22 2
-----TGGTTGACCAGAGAGCACAC----- mirL 20 1
-----TGGTTGACCAGAGAGCACACGCT----- mirL 23 1
-----GCTATATTTGTGCCGTTT----- loop 18 1
-----TTTGTGACCTGGTCCACTAACCC----- mirR 23 1179
-----TTTGTGACCTGGTCCACTA----- mirR 19 1087
-----TTTGTGACCTGGTCCACTAAC----- mirR 22 343
-----TTTGTGACCTGGTCCACTAA----- mirR 20 150
-----TTTGTGACCTGGTCCACTAAC----- mirR 21 149
-----TTTGTGACCTGGTCCACTAACCCCT----- mirR 24 122
-----TTGTGACCTGGTCCACTA----- mirR 18 104
-----TTTGTGACCTGGTCCACT----- mirR 18 83
-----TTGTGACCTGGTCCACTAACCC----- mirR 22 49
-----TTGTGACCTGGTCCACTAAC----- mirR 21 29
-----TTGTGACCTGGTCCACTAA----- mirR 19 14
-----TTGTGACCTGGTCCACTAACCCCT----- mirR 23 9
-----TTGTGACCTGGTCCACTAAC----- mirR 20 8
-----TGTGACCTGGTCCACTAA----- mirR 18 6
-----GTGACCTGGTCCACTAAC----- mirR 19 4
-----TGTGACCTGGTCCACTAAC----- mirR 20 3
-----GTTTGTGACCTGGTCCACTA----- mirR 20 2
-----TGTGACCTGGTCCACTAACCC----- mirR 21 2
-----TTGTGACCTGGTCCACTAACCCCTC----- mirR 24 2
-----GTTTGTGACCTGGTCCACTAAC----- mirR 23 2
-----GTGACCTGGTCCACTAACCCCT----- mirR 21 1
-----CGTTTGTGACCTGGTCCACTA----- mirR 21 1
-----TGTGACCTGGTCCACTAAC----- mirR 19 1
-----TGTGACCTGGTCCACTAACCCCT----- mirR 22 1
-----CCCTCAGTATCTAACCTT morR 18 1

>mmu-mir-690
GCTAGTAAGAAAACATTCTCCTCCAGCTGGAGAGATGGCTCAGCTGTTAAAGGCTAGGCTCACAACCAAAATATAAGAACCCTTCTTCTCCTA species len reads
GCTAGTAAGAAAACATTCT----- mirL 18 2
---AGTAAGAAAACATTCTCT----- mirL 18 1

```

```

GCTAGTAAGAAACATTCTCC----- mirL 20 1
---AGTAAGAAACATTCTCTC----- mirL 19 1
-----AAAGGCTAGGCTCACAAACAAA----- mirR 22 2129
-----AAAGGCTAGGCTCACAAACAAA----- mirR 21 401
-----AAAGGCTAGGCTCACAAACAAA----- mirR 23 268
-----AAAGGCTAGGCTCACAAACAAA----- mirR 20 70
-----AAGGCTAGGCTCACAAACAAA----- mirR 21 49
-----GGCTAGGCTCACAAACAAA----- mirR 19 38
-----AGGCTAGGCTCACAAACAAA----- mirR 20 36
-----AAAGGCTAGGCTCACAAAC----- mirR 19 29
-----GGCTAGGCTCACAAACAAA----- mirR 18 25
-----AAAGGCTAGGCTCACAAACAAAAT----- mirR 24 25
-----AAGGCTAGGCTCACAAACAAA----- mirR 22 21
-----AAAGGCTAGGCTCACAAAC----- mirR 18 20
-----GTTAAAGGCTAGGCTCAC----- mirR 18 19
-----AGGCTAGGCTCACAAACAAA----- mirR 21 18
-----AGGCTAGGCTCACAAACAAAAT----- mirR 22 18
-----AGGCTAGGCTCACAAACAAA----- mirR 19 16
-----GTTAAAGGCTAGGCTCACAAAC----- mirR 21 14
-----GGCTAGGCTCACAAACAAA----- mirR 20 13
-----GGCTAGGCTCACAAACAAAAT----- mirR 21 12
-----TAAAGGCTAGGCTCACAAAC----- mirR 19 8
-----AAGGCTAGGCTCACAAACAAA----- mirR 20 8
-----TAAAGGCTAGGCTCACAAACAAA----- mirR 23 7
-----TAAAGGCTAGGCTCACAAACAAA----- mirR 22 5
-----AAGGCTAGGCTCACAAACAAAAT----- mirR 23 4
-----AAGGCTAGGCTCACAAAC----- mirR 18 4
-----AGGCTAGGCTCACAAACAAA----- mirR 18 4
-----GTTAAAGGCTAGGCTCACAA----- mirR 20 3
-----GTTAAAGGCTAGGCTCACAAAC----- mirR 22 3
-----AAGGCTAGGCTCACAAACAAA----- mirR 19 3
-----TAAAGGCTAGGCTCACAA----- mirR 18 3
-----GTTAAAGGCTAGGCTCACAA----- mirR 19 3
-----TTAAAGGCTAGGCTCACAAAC----- mirR 21 3
-----GGCTAGGCTCACAAACAAAATAT----- mirR 23 3
-----TAAAGGCTAGGCTCACAAACAAAAT----- mirR 25 3
-----GGCTAGGCTCACAAACAAAATA----- mirR 22 2
-----AGGCTAGGCTCACAAACAAAATA----- mirR 23 2
-----TTAAAGGCTAGGCTCACAAACAAA----- mirR 23 2
-----TAAAGGCTAGGCTCACAAACAAA----- mirR 24 2
-----AAGGCTAGGCTCACAAACAAAATAT----- mirR 25 2
-----TTAAAGGCTAGGCTCACAAACAAA----- mirR 24 2
-----GGCTAGGCTCACAAACAAAATATA----- mirR 25 1
-----TTAAAGGCTAGGCTCACAAACAAAATA----- mirR 27 1
-----GTTAAAGGCTAGGCTCACAAACAAAAT----- mirR 27 1
-----AGGCTAGGCTCACAAACAAAATATA----- mirR 25 1

```

```

-----TTAAAGGCTAGGCTCACAAAC----- mirR 20 1
-----TAAAGGCTAGGCTCACAAACAAAATAT----- mirR 27 1
-----GTAAAGGCTAGGCTCACAAACAAAATA----- mirR 28 1
-----TTAAAGGCTAGGCTCACAAACAAAAT----- mirR 26 1
-----TTAAAGGCTAGGCTCACAAAC----- mirR 22 1
-----ATAAGAACCCTCTTCTCCTA morR 21 2

```

>mmu-mir-504

| Species | len | reads |
|---------|-----|-------|
| morL    | 18  | 3     |
| morL    | 19  | 1     |
| morL    | 18  | 1     |
| mirL    | 21  | 1267  |
| mirL    | 22  | 488   |
| mirL    | 20  | 378   |
| mirL    | 21  | 344   |
| mirL    | 22  | 164   |
| mirL    | 23  | 88    |
| mirL    | 20  | 69    |
| mirL    | 19  | 66    |
| mirL    | 18  | 29    |
| mirL    | 18  | 29    |
| mirL    | 19  | 27    |
| mirL    | 18  | 22    |
| mirL    | 23  | 21    |
| mirL    | 19  | 20    |
| mirL    | 18  | 18    |
| mirL    | 24  | 17    |
| mirL    | 18  | 13    |
| mirL    | 20  | 12    |
| mirL    | 19  | 10    |
| mirL    | 20  | 4     |
| mirL    | 19  | 4     |
| mirL    | 21  | 4     |
| mirL    | 22  | 4     |
| mirL    | 19  | 3     |
| mirL    | 24  | 3     |
| mirL    | 21  | 3     |
| mirL    | 21  | 2     |
| mirL    | 23  | 1     |
| loop    | 18  | 1     |
| loop    | 20  | 1     |
| mirR    | 22  | 58    |
| mirR    | 21  | 19    |
| mirR    | 21  | 18    |
| mirR    | 23  | 17    |

```
-----GGGAGAGCAGGGCAGGGTTTCC----- mirR 22 16
-----GGGAGAGCAGGGCAGGGTTTCCC----- mirR 23 5
-----AGGGAGAGCAGGGCAGGGTTTCCC----- mirR 24 4
-----AGGGAGAGCAGGGCAGGGTT----- mirR 20 4
-----GGGAGAGCAGGGCAGGGTTT----- mirR 20 4
-----GGGAGAGCAGGGCAGGGTTTCCCA----- mirR 24 4
-----AGGGAGAGCAGGGCAGGG----- mirR 18 4
-----AGGGAGAGCAGGGCAGGGT----- mirR 19 3
-----AAGGGAGAGCAGGGCAGGGTTTC----- mirR 23 2
-----GGGAGAGCAGGGCAGGGTTTCCCAT----- mirR 25 1
-----AAGGGAGAGCAGGGCAGGGTTTCC----- mirR 24 1
-----ATACAGAGGGCACAGGCT morR 18 1

>mmu-mir-1965
ATTAAAGGCTTGCGCCACCATGCCTGGCTCTTTTGTTTTGTTTTATTGTGATCCTAGATCCCATCATGTGAACATCTAGATTTAGCATCACAATCAGGAACCTGTAAGCCGGGCCGTAGTGGCGCAAGCCTTTAATTTTCAG
-----TGCGCCACCATGCCTGGC-----
-----TGCGCCACCATGCCTGGCT-----
ATTAAAGGCTTGCGCCACCATGCC-----
-TTAAAGGCTTGCGCCACCATGCC-----
-----AGGCTTGCGCCACCATGCC-----
-----CTTGCGCCACCATGCCTGG-----
-----GCTCTTTTGTTTTGTTTT-----
-----CTTTTGTTTTGTTTTATT-----
-----TCTTTTGTTTTGTTTTAT-----
-----GGCTCTTTTGTTTTGTTT-----
-----GGCTCTTTTGTTTTGTTTT-----
-----GCTCTTTTGTTTTGTTTTA-----
-----CTTTTGTTTTGTTTTATTG-----
-----CTCTTTTGTTTTGTTTTA-----
-----TGGCTCTTTTGTTTTGTTT-----
-----CTGGCTCTTTTGTTTTGTTTTA-----
-----CTGGCTCTTTTGTTTTGTTT-----
-----TGGCTCTTTTGTTTTGTTT-----
-----TCTTTTGTTTTGTTTTATT-----
-----CTTTTGTTTTGTTTTATTGT-----
-----TGGCTCTTTTGTTTTGTTTT-----
-----TCTTTTGTTTTGTTTTATTGT-----
-----AAGCCGGGCCGTAGTGGCGCA-----
-----AAGCCGGGCCGTAGTGGCGCAA-----
-----AAGCCGGGCCGTAGTGGCGC-----
-----AAGCCGGGCCGTAGTGGCG-----
-----AAGCCGGGCCGTAGTGGCGAAG-----
-----AGCCGGGCCGTAGTGGCGCA-----
-----GCCGGGCCGTAGTGGCGCA-----
-----AAGCCGGGCCGTAGTGGC-----
-----CCGGGCCGTAGTGGCGCA-----
```



```

-----AAGCCGGGCCGTAGTGGCGCAAGC-----
-----AGCCGGGCCGTAGTGGCGC-----
-----AGCCGGGCCGTAGTGGCGCAAG-----
-----GCCGGGCCGTAGTGGCGCAA-----
-----AGCCGGGCCGTAGTGGCGCAA-----
-----GCCGGGCCGTAGTGGCGC-----
-----TAAGCCGGGCCGTAGTGGCGCA-----
-----GCCGGGCCGTAGTGGCGCAAG-----
-----GTAAGCCGGGCCGTAGTGGCGCAA-----
-----TAAGCCGGGCCGTAGTGGCGCAAG-----
-----TAAGCCGGGCCGTAGTGGCGCAA-----
-----AGCCGGGCCGTAGTGGCG-----
-----AGCCTTTAATTTTCAG
-----AGCCTTTAATTTTCAG
-----AGCCTTTAATTTTCAG
-----AGCCTTTAATTTTCAG
-----GCAAGCCTTTAATTTTCAG
-----AGCCTTTAATTTTCAG
-----AGCCTTTAATTTTCAG
-----AGCCTTTAATTTTCAG
-----CTTTAATTTTCAG

```

>mmu-mir-491

| Sequence                                                                                          | species | len | reads |
|---------------------------------------------------------------------------------------------------|---------|-----|-------|
| TGGGAATTGACTTAGCTGGGAAGTGGGGAACCCTTCCATGAGGAGTAGAACACTCCTTATGCAAGATTCCTTCTACCTGACTGAGTTGAAGTCATAT | morL    | 19  | 1     |
| --GGAATTGACTTAGCTGGGA-----                                                                        | morL    | 19  | 1     |
| TGGGAATTGACTTAGCTGG-----                                                                          | mirL    | 22  | 284   |
| -----AGTGGGGAACCCTTCCATGAGG-----                                                                  | mirL    | 21  | 266   |
| -----AGTGGGGAACCCTTCCATGAG-----                                                                   | mirL    | 20  | 188   |
| -----AGTGGGGAACCCTTCCATGAGGAG-----                                                                | mirL    | 24  | 174   |
| -----AGTGGGGAACCCTTCCATGAGGA-----                                                                 | mirL    | 23  | 151   |
| -----AGTGGGGAACCCTTCCAT-----                                                                      | mirL    | 18  | 100   |
| -----AGTGGGGAACCCTTCCATG-----                                                                     | mirL    | 19  | 87    |
| -----GTGGGGAACCCTTCCATGA-----                                                                     | mirL    | 19  | 7     |
| -----TGGGGAACCCTTCCATGA-----                                                                      | mirL    | 18  | 6     |
| -----GTGGGGAACCCTTCCATGAGGA-----                                                                  | mirL    | 22  | 4     |
| -----AAGTGGGGAACCCTTCCATGAGGAG-----                                                               | mirL    | 25  | 3     |
| -----AAGTGGGGAACCCTTCCATGA-----                                                                   | mirL    | 21  | 2     |
| -----TGGGGAACCCTTCCATGAGGA-----                                                                   | mirL    | 21  | 2     |
| -----AAGTGGGGAACCCTTCCATGAGG-----                                                                 | mirL    | 23  | 2     |
| -----GTGGGGAACCCTTCCATGAG-----                                                                    | mirL    | 20  | 2     |
| -----AAGTGGGGAACCCTTCCA-----                                                                      | mirL    | 18  | 2     |
| -----TGGGGAACCCTTCCATGAG-----                                                                     | mirL    | 19  | 1     |
| -----GTGGGGAACCCTTCCATG-----                                                                      | mirL    | 18  | 1     |
| -----GGGGAACCCTTCCATGAG-----                                                                      | mirL    | 18  | 1     |
| -----TGGGGAACCCTTCCATGAGGAG-----                                                                  | mirL    | 22  | 1     |

```

-----GGAAGTGGGGAACCCTTC----- mirL 18 1
-----AAGTGGGGAACCCTTCCATG----- mirL 20 1
-----GGAAGTGGGGAACCCTTCC----- mirL 19 1
-----GGGGAACCCTTCCATGAGGA----- mirL 20 1
-----CTTATGCAAGATTCCCTTCTAC----- mirR 22 793
-----CTTATGCAAGATTCCCTTCTA----- mirR 21 544
-----CTTATGCAAGATTCCCTTCT----- mirR 20 122
-----CTTATGCAAGATTCCCTTC----- mirR 19 121
-----CTTATGCAAGATTCCCTTCTACC----- mirR 23 93
-----ATGCAAGATTCCCTTCTA----- mirR 18 51
-----ATGCAAGATTCCCTTCTAC----- mirR 19 41
-----CTTATGCAAGATTCCCTT----- mirR 18 36
-----TTATGCAAGATTCCCTTCTAC----- mirR 21 29
-----TATGCAAGATTCCCTTCTA----- mirR 19 22
-----TTATGCAAGATTCCCTTCTACC----- mirR 22 21
-----TATGCAAGATTCCCTTCTAC----- mirR 20 18
-----TTATGCAAGATTCCCTTCTA----- mirR 20 12
-----CTTATGCAAGATTCCCTTCTACCT----- mirR 24 9
-----ATGCAAGATTCCCTTCTACC----- mirR 20 8
-----TTATGCAAGATTCCCTTC----- mirR 18 5
-----TTATGCAAGATTCCCTTCTACCT----- mirR 23 3
-----TATGCAAGATTCCCTTCT----- mirR 18 3
-----TATGCAAGATTCCCTTCTACC----- mirR 21 3
-----ATGCAAGATTCCCTTCTACCT----- mirR 21 2
-----TTATGCAAGATTCCCTTCT----- mirR 19 2
-----TTATGCAAGATTCCCTTCTACCTG----- mirR 24 2
-----CCTTATGCAAGATTCCCTTCTAC----- mirR 23 1
-----CCTTATGCAAGATTCCCTTC----- mirR 20 1
-----ACTGAGTTGAAGTCATAT morR 18 1

>mmu-mir-682
CCAAGATGAAGAGACGAGCCGTCGGCATCTGGCACTGTGGTTCTGCATGAAAACAGTGGCCGGCGGGCCTGGACCTACAACACCACCTCTGCAGTCACAGTGAAGTCTGCCATCAGAAGACTGAAGGAAC species
--AAGATGAAGAGACGAGCC----- morL 18
CCAAGATGAAGAGACGAG----- morL 18
-----CGTCGGCATCTGGCACTG----- mirL 18
-----CTGCAGTCACAGTGAAGTCTG----- mirR 21
-----CTGCAGTCACAGTGAAGTCTGC----- mirR 22
-----CTGCAGTCACAGTGAAGTCT----- mirR 20
-----CTGCAGTCACAGTGAAGTC----- mirR 19
-----CTGCAGTCACAGTGAAGTCTGCC----- mirR 23
-----GCAGTCACAGTGAAGTCTG----- mirR 19
-----CAGTCACAGTGAAGTCTG----- mirR 18
-----CTGCAGTCACAGTGAAGT----- mirR 18
-----TGCAGTCACAGTGAAGTCTG----- mirR 20
-----CTGCAGTCACAGTGAAGTCTGCCA----- mirR 24
-----TCTGCAGTCACAGTGAAGTCTG----- mirR 22

```

```

-----CCTCTGCAGTCACAGTGA----- mirR 18
-----TGCAGTCACAGTGAAGTC----- mirR 18
-----TCTGCAGTCACAGTGAAGTC----- mirR 20
-----TCTGCAGTCACAGTGAAG----- mirR 18
-----CTCTGCAGTCACAGTGAAGTCTG----- mirR 23
-----CCTCTGCAGTCACAGTGAAGTCTG----- mirR 24
-----TGCAGTCACAGTGAAGTCTGC----- mirR 21
-----CTCTGCAGTCACAGTGAAG----- mirR 19
-----ATCAGAAGACTGAAGGAA----- morR 18
-----TCAGAAGACTGAAGGAAC----- morR 18

```

>mmu-mir-767

```

TCCATATAGGTTTTTACTCATGCACCATGGTTGTCTGAGCACATAACATGCTTGTCTGCTCATACCCTATGGTTCCTGAAGAGGAATCTTAACTGTC species len reads
TCCATATAGGTTTTTACT----- morL 18 1
TCCATATAGGTTTTTACT----- morL 19 1
-----TGCACCATGGTTGTCTGAGCA----- mirL 21 889
-----TGCACCATGGTTGTCTGAGCAC----- mirL 22 723
-----TGCACCATGGTTGTCTGAGCACA----- mirL 23 706
-----TGCACCATGGTTGTCTGAGC----- mirL 20 238
-----TGCACCATGGTTGTCTGAGCACAT----- mirL 24 211
-----TGCACCATGGTTGTCTGA----- mirL 18 92
-----TGCACCATGGTTGTCTGAG----- mirL 19 44
-----GCACCATGGTTGTCTGAGCAC----- mirL 21 31
-----GCACCATGGTTGTCTGAGCACA----- mirL 22 30
-----GCACCATGGTTGTCTGAGCA----- mirL 20 25
-----CACCATGGTTGTCTGAGCAC----- mirL 20 11
-----ACCATGGTTGTCTGAGCA----- mirL 18 7
-----ACCATGGTTGTCTGAGCAC----- mirL 19 7
-----GCACCATGGTTGTCTGAGCACAT----- mirL 23 5
-----CACCATGGTTGTCTGAGCA----- mirL 19 5
-----GCACCATGGTTGTCTGAGC----- mirL 19 5
-----GCACCATGGTTGTCTGAG----- mirL 18 4
-----ATGCACCATGGTTGTCTGAGCACA----- mirL 24 3
-----ACCATGGTTGTCTGAGCACA----- mirL 20 2
-----ATGCACCATGGTTGTCTGAGCA----- mirL 22 2
-----CACCATGGTTGTCTGAGCACA----- mirL 21 2
-----CACCATGGTTGTCTGAGC----- mirL 18 2
-----CATGCACCATGGTTGTCT----- mirL 18 1
-----ATGCACCATGGTTGTCTG----- mirL 18 1
-----GCACCATGGTTGTCTGAGCACATA----- mirL 24 1
-----CACCATGGTTGTCTGAGCACATA----- mirL 24 1
-----ACCATGGTTGTCTGAGCACATA----- mirL 22 1
-----ATGCACCATGGTTGTCTGAGC----- mirL 21 1
-----TCTGCTCATACCCTATGGTTCCT----- mirR 23 53
-----TCTGCTCATACCCTATGGTTCC----- mirR 22 34
-----TCTGCTCATACCCTATGGTTC----- mirR 21 24

```

```

-----TCTGCTCATACCCTATGGTT----- mirR 20 9
-----TCTGCTCATACCCTATGGT----- mirR 19 4
-----CTGCTCATACCCTATGGTTC----- mirR 20 3
-----CTGCTCATACCCTATGGTTCC----- mirR 21 3
-----TCTGCTCATACCCTATGG----- mirR 18 3
-----TCTGCTCATACCCTATGGTTCCCTG----- mirR 24 3
-----CTGCTCATACCCTATGGTTCCCT----- mirR 22 2
-----TGCTCATACCCTATGGTTCC----- mirR 20 1
-----GCTCATACCCTATGGTTCCCT----- mirR 20 1
-----TGCTCATACCCTATGGTTCCCT----- mirR 21 1
-----CCTGAAGAGGAATCTTAA----- morR 18 10
-----AGAGGAATCTTAACTGTC morR 18 1

```

>mmu-mir-687

| Species | len | reads |
|---------|-----|-------|
| morL    | 18  | 2     |
| morL    | 19  | 1     |
| morL    | 22  | 1     |
| mirL    | 22  | 2296  |
| mirL    | 21  | 244   |
| mirL    | 23  | 151   |
| mirL    | 20  | 99    |
| mirL    | 20  | 79    |
| mirL    | 19  | 70    |
| mirL    | 18  | 57    |
| mirL    | 19  | 35    |
| mirL    | 21  | 21    |
| mirL    | 24  | 18    |
| mirL    | 19  | 16    |
| mirL    | 18  | 14    |
| mirL    | 18  | 9     |
| mirL    | 21  | 6     |
| mirL    | 18  | 5     |
| mirL    | 20  | 4     |
| mirL    | 20  | 3     |
| mirL    | 23  | 3     |
| mirL    | 19  | 3     |
| mirL    | 22  | 1     |
| mirL    | 20  | 1     |
| mirR    | 18  | 2     |
| mirR    | 18  | 2     |
| mirR    | 18  | 1     |
| mirR    | 23  | 1     |
| morR    | 18  | 2     |
| morR    | 18  | 1     |
| morR    | 18  | 1     |

```

>mmu-mir-449a
GCCTGTGTGTGATGGCTTGGCAGTGTATTGTTAGCTGGTTGAGTATGTGAGCGGCACCAGCTAACATGCGACTGCTCTCCTATTGCACACACAATCACCACCAGCATGCATTTACAGCTCATGTATGTGCTTTGCCA spe
GCCTGTGTGTGATGGCTTG----- mor
GCCTGTGTGTGATGGCTTG----- mor
GCCTGTGTGTGATGGCTT----- mor
-----TGGCAGTGTATTGTTAGCTGG----- mir
-----TGGCAGTGTATTGTTAGCTGGT----- mir
-----TGGCAGTGTATTGTTAGCTGGTT----- mir
-----TGGCAGTGTATTGTTAGCTG----- mir
-----GGCAGTGTATTGTTAGCTGGT----- mir
-----TGGCAGTGTATTGTTAGCTGGTTG----- mir
-----TGGCAGTGTATTGTTAGCT----- mir
-----TGGCAGTGTATTGTTAGC----- mir
-----GCAGTGTATTGTTAGCTGGT----- mir
-----GGCAGTGTATTGTTAGCTGG----- mir
-----GGCAGTGTATTGTTAGCTGGTT----- mir
-----GCAGTGTATTGTTAGCTGG----- mir
-----GGCAGTGTATTGTTAGCTG----- mir
-----CAGTGTATTGTTAGCTGGT----- mir
-----CAGTGTATTGTTAGCTGG----- mir
-----GCAGTGTATTGTTAGCTG----- mir
-----GCAGTGTATTGTTAGCTGGTT----- mir
-----TTGGCAGTGTATTGTTAGCTGGT----- mir
-----CAGTGTATTGTTAGCTGGTT----- mir
-----GGCAGTGTATTGTTAGCTGGTTG----- mir
-----GCAGTGTATTGTTAGCTGGTTG----- mir
-----GGCAGTGTATTGTTAGCTGGTTGAG----- mir
-----GGCAGTGTATTGTTAGCT----- mir
-----CTTGGCAGTGTATTGTTA----- mir
-----GCTCATGTATGTGCTTTGC----- mir
-----GCTCATGTATGTGCTTTGCCA----- mir
-----GCTCATGTATGTGCTTTGCC----- mir
-----CAGCTCATGTATGTGCTTTGC----- mir
-----GCTCATGTATGTGCTTTG----- mir
-----AGCTCATGTATGTGCTTTG----- mir

>mmu-mir-1956
TAACGACTCCTGACCTTCAGTCCAGGGCTGAGTCAGCGGAGCCCCGAGTGGCTTCCTGGCTGGCACCTGGACGTAGGCTATTTCCGTCCACGTCCAAGCAGAATACTGGAACCGATTGGACA species len rea
-AACGACTCCTGACCTTCA----- morL 18 1
TAACGACTCCTGACCTTC----- morL 18 1
TAACGACTCCTGACCTTCA----- morL 19 1
-----AGTCCAGGGCTGAGTCAGCGGA----- mirL 22 1687
-----AGTCCAGGGCTGAGTCAGCGGAG----- mirL 23 599
-----AGTCCAGGGCTGAGTCAGCGG----- mirL 21 356
-----AGTCCAGGGCTGAGTCAGCGGAG----- mirL 24 158

```

```

-----AGTCCAGGGCTGAGTCAGCG----- mirL 20 86
-----AGTCCAGGGCTGAGTCAGC----- mirL 19 62
-----AGTCCAGGGCTGAGTCAG----- mirL 18 36
-----GTCCAGGGCTGAGTCAGCGGA----- mirL 21 30
-----CCAGGGCTGAGTCAGCGGA----- mirL 19 16
-----TCCAGGGCTGAGTCAGCGGA----- mirL 20 14
-----GTCCAGGGCTGAGTCAGCGGAG----- mirL 22 7
-----GTCCAGGGCTGAGTCAGCGG----- mirL 20 5
-----CCAGGGCTGAGTCAGCGG----- mirL 18 4
-----TCCAGGGCTGAGTCAGCGGAG----- mirL 21 4
-----CAGTCCAGGGCTGAGTCAGCGGA----- mirL 23 3
-----GTCCAGGGCTGAGTCAGC----- mirL 18 3
-----TCCAGGGCTGAGTCAGCG----- mirL 18 3
-----CAGTCCAGGGCTGAGTCAGCGGAG----- mirL 24 3
-----TCCAGGGCTGAGTCAGCGG----- mirL 19 3
-----CCAGGGCTGAGTCAGCGGAG----- mirL 20 2
-----GTCCAGGGCTGAGTCAGCGGAGC----- mirL 23 2
-----CAGTCCAGGGCTGAGTCAGCGG----- mirL 22 1
-----GTCCAGGGCTGAGTCAGCG----- mirL 19 1
-----TACTGGAACCGATTGGACA mirR 19 4
-----ACTGGAACCGATTGGACA mirR 18 1

```

>mmu-mir-1193

```

GGATGGTAGACCGGTGACGTACACTTCATTTATGCTGTAGGTACCCCGTTTTACTATCCACCAACACCCAGACCATCTGT species len reads
--ATGGTAGACCGGTGACGTACA----- mirL 21 9
--TGGTAGACCGGTGACGTA----- mirL 18 4
--ATGGTAGACCGGTGACGTAC----- mirL 20 3
--TGGTAGACCGGTGACGTACA----- mirL 20 1
GGATGGTAGACCGGTGAC----- mirL 18 1
--TGGTAGACCGGTGACGTACTT----- mirL 23 1
-----TAGGTCACCCGTTTTACTATCC----- mirR 22 1397
-----TAGGTCACCCGTTTTACTATC----- mirR 21 652
-----TAGGTCACCCGTTTTACTAT----- mirR 20 619
-----TAGGTCACCCGTTTTACTA----- mirR 19 163
-----TAGGTCACCCGTTTTACTATCCA----- mirR 23 38
-----AGGTCACCCGTTTTACTATCC----- mirR 21 37
-----TAGGTCACCCGTTTTACT----- mirR 18 32
-----AGGTCACCCGTTTTACTATC----- mirR 20 30
-----AGGTCACCCGTTTTACTA----- mirR 18 27
-----AGGTCACCCGTTTTACTAT----- mirR 19 25
-----TAGGTCACCCGTTTTACTATCCAC----- mirR 24 10
-----GGTCACCCGTTTTACTAT----- mirR 18 9
-----TGTAGGTCACCCGTTTTACTAT----- mirR 22 6
-----TGTAGGTCACCCGTTTTACTATC----- mirR 23 5
-----GGTCACCCGTTTTACTATC----- mirR 19 3
-----AGGTCACCCGTTTTACTATCCA----- mirR 22 3

```

C:\Documents and Settings\hong\Desktop\Hippocampus-total RNA.txt

```
-----GTCACCCGTTTTACTATC----- mirR 18 2
-----GTAGGTCACCCGTTTTACTATCC----- mirR 23 1
-----GGTCACCCGTTTTACTATCC----- mirR 20 1
-----GTAGGTCACCCGTTTTACTATC----- mirR 22 1
-----TGTAGGTCACCCGTTTTA----- mirR 18 1
-----AACCCAGACCATCTGT morR 18 1
-----CACCAACCCAGACCATCT-- morR 20 1
-----TCCACCAACCCAGACC----- morR 18 1
```

>mmu-mir-704

```
CTGTCCCTTGCACAGCTGGGAGCTAGAGGATGTGGTCAGCTGCAAGGATCTTCCTCAGACATGTGCTCTGCTCCTAGGGATTGTTGACTACATGATTG species len reads
-----CTTGCACAGCTGGGAGCT----- morL 18 2
---TCCCTTGCACAGCTGGGAG--- morL 19 1
CTGTCCCTTGCACAGCTGG--- morL 19 1
-----GCTAGAGGATGTGGTCAG----- mirL 18 3
-----AGCTAGAGGATGTGGTCA----- mirL 18 1
-----GAGCTAGAGGATGTGGTC----- mirL 18 1
-----AGCTGCAAGGATCTTCCTC----- loop 19 2
-----GCTGCAAGGATCTTCCTCAG----- loop 20 1
-----CAGCTGCAAGGATCTTCC----- loop 18 1
-----CAGCTGCAAGGATCTTCCT----- loop 19 1
-----AGACATGTGCTCTGCTCCTAG----- mirR 21 1231
-----AGACATGTGCTCTGCTCCTA----- mirR 20 1142
-----AGACATGTGCTCTGCTCCTAGG----- mirR 22 158
-----GACATGTGCTCTGCTCCTAG----- mirR 20 114
-----AGACATGTGCTCTGCTCC----- mirR 18 107
-----AGACATGTGCTCTGCTCCT----- mirR 19 76
-----GACATGTGCTCTGCTCCTA----- mirR 19 35
-----CATGTGCTCTGCTCCTAG----- mirR 18 26
-----ACATGTGCTCTGCTCCTA----- mirR 18 26
-----ACATGTGCTCTGCTCCTAG----- mirR 19 24
-----AGACATGTGCTCTGCTCCTAGGG----- mirR 23 16
-----GACATGTGCTCTGCTCCTAGG----- mirR 21 11
-----AGACATGTGCTCTGCTCCTAGGGAT----- mirR 25 6
-----GACATGTGCTCTGCTCCT----- mirR 18 6
-----CAGACATGTGCTCTGCTCCTAG----- mirR 22 4
-----ACATGTGCTCTGCTCCTAGG----- mirR 20 2
-----CTCAGACATGTGCTCTGC----- mirR 18 1
-----CAGACATGTGCTCTGCTCCTA----- mirR 21 1
-----CAGACATGTGCTCTGCTCCT----- mirR 20 1
-----ACATGTGCTCTGCTCCTAGGG----- mirR 21 1
-----CATGTGCTCTGCTCCTAGG----- mirR 19 1
-----TTGTTGACTACATGATTG morR 18 1
```

>mmu-mir-298

```
GCATAAGAGGCCAGGCCTTTGGCAGAGGAGGCTGTCTTCCTTGAGTTTTATGACTGGGAGGAAGCTAGCCTTCTCAGCTTAGGAGTGGGCCAACAGCTTCTCCGATCTCCAGGAGAATGTTGCTGGTTGACACA
```

```
---TAAGAGGCCAGGCCTTT---
GCATAAGAGGCCAGGCC-----
-----AGAGGCCAGGCCTTTGG-----
-----GGCAGAGGAGGGCTGTTCTTCC-----
-----GGCAGAGGAGGGCTGTTCTTCCC-----
-----GGCAGAGGAGGGCTGTTCTTCC-----
-----GGCAGAGGAGGGCTGTTCTT-----
-----GGCAGAGGAGGGCTGTTCT-----
-----GGCAGAGGAGGGCTGTTCTTCCCT-----
-----GGCAGAGGAGGGCTGTTCT-----
-----AGAGGAGGGCTGTTCTTCCC-----
-----AGAGGAGGGCTGTTCTTCC-----
-----CAGAGGAGGGCTGTTCTTCCC-----
-----CAGAGGAGGGCTGTTCTT-----
-----CAGAGGAGGGCTGTTCTTCC-----
-----GCAGAGGAGGGCTGTTCTTCCC-----
-----CAGAGGAGGGCTGTTCTTCCCT-----
-----GCAGAGGAGGGCTGTTCT-----
-----GCAGAGGAGGGCTGTTCTTCC-----
-----CAGAGGAGGGCTGTTCTTCC-----
-----TTGGCAGAGGAGGGCTGTTCTTCCC-----
-----AGAGGAGGGCTGTTCTTCCCTT-----
-----CAGAGGAGGGCTGTTCTTCCCTTG-----
-----GCAGAGGAGGGCTGTTCTT-----
-----AGAGGAGGGCTGTTCTTCCCT-----
-----TGGCAGAGGAGGGCTGTTCTTCC-----
-----AGAGGAGGGCTGTTCTTCC-----
-----TGGCAGAGGAGGGCTGTTCTTCCC-----
-----TGGCAGAGGAGGGCTGTT-----
-----TTTGGCAGAGGAGGGCTGTTCTTCC-----
-----TCCTTCCGATCTCCAGGA-----
-----TCCTTCCGATCTCCAGGAG-----
-----CCTTCCGATCTCCAGGAGAA-----
-----AATGTTGCTGGTTGACACA-----
```

```
>mmu-mir-96
AGTACCATCTGCTTGGCCGATTTTGGCACTAGCACATTTTGGCTTGTGTCTCTCCGCTGTGAGCAATCATGTGTAGTGCCAATATGGG species len reads
AGTACCATCTGCTTGGCC----- morL 18 2
AGTACCATCTGCTTGGCCGA----- morL 20 1
AGTACCATCTGCTTGGCCG----- morL 19 1
-----TTTGGCACTAGCACATTTTGG----- mirL 21 109
-----TTTGGCACTAGCACATTT----- mirL 18 74
-----TTTGGCACTAGCACATTT----- mirL 19 59
-----TTTGGCACTAGCACATTTTGGCT----- mirL 23 49
-----TTTGGCACTAGCACATTTTGG----- mirL 22 46
-----TTTGGCACTAGCACATTTT----- mirL 20 41
```



```

-----TTTGGCACTAGCACATTTTGGCTT----- mirL 24 23
-----GGCACTAGCACATTTTGG----- mirL 18 9
-----TTGGCACTAGCACATTTT----- mirL 18 6
-----TGGCACTAGCACATTTT----- mirL 18 4
-----TTGGCACTAGCACATTTTGG----- mirL 20 4
-----TTGGCACTAGCACATTTT----- mirL 19 3
-----TGGCACTAGCACATTTTGG----- mirL 19 3
-----GGCACTAGCACATTTTGGC----- mirL 19 2
-----TTGGCACTAGCACATTTTGGCT----- mirL 22 2
-----TTGGCACTAGCACATTTTGGCTGG----- mirL 24 1
-----TTTTGGCACTAGCACATT----- mirL 18 1
-----GATTTTGGCACTAGCACACA----- mirL 18 1
-----TTTTGGCACTAGCACATTTTGG----- mirL 22 1
-----TGGCACTAGCACATTTTGGCTT----- mirL 22 1
-----TTGGCACTAGCACATTTTGGCTT----- mirL 23 1
-----TTGGCACTAGCACATTTTGGCTTGGTGTCT----- mirL 29 1
-----GTGTCTCTCCGCTGTGAG----- loop 18 1
-----TTGTGTCTCTCCGCTGTG----- loop 18 1
-----AATCATGTGTAGTGCCAATATG-- mirR 22 910
-----AATCATGTGTAGTGCCAATAT-- mirR 21 658
-----AATCATGTGTAGTGCCAATA--- mirR 20 374
-----AATCATGTGTAGTGCCAAT----- mirR 19 305
-----AATCATGTGTAGTGCCAA----- mirR 18 113
-----ATCATGTGTAGTGCCAATAT-- mirR 20 28
-----AATCATGTGTAGTGCCAATATGG- mirR 23 21
-----ATCATGTGTAGTGCCAATA--- mirR 19 16
-----ATCATGTGTAGTGCCAATATG-- mirR 21 11
-----TCATGTGTAGTGCCAATAT-- mirR 19 11
-----CATGTGTAGTGCCAATAT--- mirR 18 8
-----ATCATGTGTAGTGCCAAT----- mirR 18 5
-----CAATCATGTGTAGTGCCAATAT-- mirR 22 5
-----CAATCATGTGTAGTGCCAATATG-- mirR 23 3
-----TCATGTGTAGTGCCAATATG-- mirR 20 2
-----CATGTGTAGTGCCAATATGG- mirR 20 2
-----CATGTGTAGTGCCAATATG-- mirR 19 1
-----CAATCATGTGTAGTGCCA----- mirR 18 1
-----TCATGTGTAGTGCCAATA--- mirR 18 1
-----AATCATGTGTAGTGCCAATATGGG mirR 24 1

>mmu-mir-509
TGATAACTGTGTGTGGTTCTTTACTCCAGAATGTGGCAATCATGCATAATTAATGTGATTGACATTTCTGTAATGGAGTAACACATGTGA species len reads
--ATAACTGTGTGTGGTTCT----- morL 18 1
-GATAACTGTGTGTGGTTCTT----- morL 20 1
TGATAACTGTGTGTGGTTCTT----- morL 21 1
-GATAACTGTGTGTGGTTC----- morL 18 1
-GATAACTGTGTGTGGTTCTTT----- morL 21 1

```

```

-----TACTCCAGAATGTGGCAATCA----- mirL 21 590
-----TACTCCAGAATGTGGCAATCAT----- mirL 22 264
-----TACTCCAGAATGTGGCAAT----- mirL 19 128
-----ACTCCAGAATGTGGCAATCAT----- mirL 21 82
-----ACTCCAGAATGTGGCAATCA----- mirL 20 79
-----TACTCCAGAATGTGGCAA----- mirL 18 53
-----TACTCCAGAATGTGGCAATC----- mirL 20 44
-----CTCCAGAATGTGGCAATCAT----- mirL 20 30
-----TACTCCAGAATGTGGCAATCATG----- mirL 23 13
-----ACTCCAGAATGTGGCAAT----- mirL 18 12
-----TCCAGAATGTGGCAATCA----- mirL 18 11
-----CTCCAGAATGTGGCAATCA----- mirL 19 11
-----TCCAGAATGTGGCAATCAT----- mirL 19 7
-----ACTCCAGAATGTGGCAATC----- mirL 19 5
-----CTCCAGAATGTGGCAATC----- mirL 18 4
-----CTCCAGAATGTGGCAATCATG----- mirL 21 3
-----ACTCCAGAATGTGGCAATCATG----- mirL 22 3
-----TACTCCAGAATGTGGCAATCATGC----- mirL 24 3
-----TCCAGAATGTGGCAATCATG----- mirL 20 2
-----TTACTCCAGAATGTGGCAATCA----- mirL 22 2
-----CATGCATAATTAAATGTGA----- loop 19 1
-----TGATTGACATTTCTGTAA----- mirR 18 1461
-----TGATTGACATTTCTGTAAT----- mirR 19 34
-----TGATTGACATTTCTGTAATG----- mirR 20 6
-----GATTGACATTTCTGTAAT----- mirR 18 5
-----GTGATTGACATTTCTGTAA----- mirR 19 4
-----TGATTGACATTTCTGTAATGG----- mirR 21 2
-----ATTGACATTTCTGTAATG----- mirR 18 2
-----ATTGACATTTCTGTAATGGA----- mirR 20 1
-----TTGACATTTCTGTAATGGAG----- mirR 20 1
-----GTGATTGACATTTCTGTA----- mirR 18 1
-----ATGGAGTAACACATGTGA morR 18 1

>mmu-mir-707
GCAGTCATGCCGCTTGCCTACGCTTGTGTGAGCATGGGCATGCGGTCATAGTTGTTGCGGGCAATTCGAAACAGTAGCAAAGTCTTTTGCC species len reads
-CAGTCATGCCGCTTGCCTACG----- mirL 21 1437
-CAGTCATGCCGCTTGCCTAC----- mirL 20 581
-CAGTCATGCCGCTTGCCTACGC----- mirL 22 312
-CAGTCATGCCGCTTGCCTA----- mirL 19 271
-CAGTCATGCCGCTTGCCTACGCT----- mirL 23 64
-CAGTCATGCCGCTTGCCT----- mirL 18 54
--AGTCATGCCGCTTGCCTACG----- mirL 20 29
--AGTCATGCCGCTTGCCTAC----- mirL 19 18
---TCATGCCGCTTGCCTACG----- mirL 18 15
---GTCATGCCGCTTGCCTACG----- mirL 19 14
-CAGTCATGCCGCTTGCCTACGCTT----- mirL 24 9

```

```
--AGTCATGCCGCTTGCCTACGC----- mirL 21 8
--GTCATGCCGCTTGCCTAC----- mirL 18 8
--AGTCATGCCGCTTGCCTA----- mirL 18 7
--GTCATGCCGCTTGCCTACGC----- mirL 20 4
---TCATGCCGCTTGCCTACGC----- mirL 19 2
--AGTCATGCCGCTTGCCTACGCT----- mirL 22 1
GCAGTCATGCCGCTTGCCTACGC----- mirL 23 1
--AGTCATGCCGCTTGCCTACGCTT----- mirL 23 1
---TCATGCCGCTTGCCTACGCT----- mirL 20 1
-----TGCGGGCAATTCGAAACA----- mirR 18 2
-----TAGCAAAAGTCTTTTGCC morR 18 1
-----AGTAGCAAAAGTCTTTTGCC morR 20 1
```

>mmu-mir-1931

```
AGCCATCTCCTAGGCCAGAAGCATTAACCTCTTTGAATGCTGCTCGTCAAAGATCTGTTGCAGAGCCTTTGAATTGAAGCTGCTTTAAAATTCCAATGCAAGGGCTGGTGCGATGGCTCAGTGGGTAGGAGCGCCCGA spe
---CATCTCCTAGGCCAGAAG----- mir
AGCCATCTCCTAGGCCAGA----- mir
-----ATGCAAGGGCTGGTGCGATGGC----- mir
-----ATGCAAGGGCTGGTGCGATGG----- mir
-----ATGCAAGGGCTGGTGCGATG----- mir
-----ATGCAAGGGCTGGTGCGATGGCT----- mir
-----ATGCAAGGGCTGGTGCGA----- mir
-----ATGCAAGGGCTGGTGCGAT----- mir
-----ATGCAAGGGCTGGTGCGATGGCTC----- mir
-----GCAAGGGCTGGTGCGATGGC----- mir
-----CAAGGGCTGGTGCGATGGC----- mir
-----TGCAAGGGCTGGTGCGATGGC----- mir
-----AATGCAAGGGCTGGTGCGATGGC----- mir
-----TGCAAGGGCTGGTGCGATGG----- mir
-----TGCAAGGGCTGGTGCGATGGCT----- mir
-----GCAAGGGCTGGTGCGATGG----- mir
-----CAAGGGCTGGTGCGATGG----- mir
-----TGCAAGGGCTGGTGCGATG----- mir
-----AATGCAAGGGCTGGTGCGATG----- mir
-----AATGCAAGGGCTGGTGCGATGGCT----- mir
-----AATGCAAGGGCTGGTGCGATGG----- mir
-----TGCAAGGGCTGGTGCGAT----- mir
-----AATGCAAGGGCTGGTGCGAT----- mir
-----GCAAGGGCTGGTGCGATGGCT----- mir
-----GGCTCAGTGGGTAGGAGCGCCCGA mor
-----GGCTCAGTGGGTAGGAGC----- mor
-----GCTCAGTGGGTAGGAGCGCC----- mor
-----GGCTCAGTGGGTAGGAGCG----- mor
```

>mmu-mir-883a

```

ATTCGTGTGCACTATAATGCTGAGAGAAGTAGCAGTTACTTTATTCTATAAGTAACTGCAACAGCTCTCAGTATTGT species len reads
ATTCGTGTGCACTATAAT-----morL 18 1
-----TGCTGAGAGAAGTAGCAGTTAC-----mirL 22 123
-----TGCTGAGAGAAGTAGCAGTTA-----mirL 21 64
-----CTGAGAGAAGTAGCAGTTAC-----mirL 20 26
-----TGCTGAGAGAAGTAGCAGTT-----mirL 20 17
-----TGCTGAGAGAAGTAGCAG-----mirL 18 14
-----TGCTGAGAGAAGTAGCAGT-----mirL 19 13
-----TGAGAGAAGTAGCAGTTA-----mirL 18 7
-----GCTGAGAGAAGTAGCAGTTAC-----mirL 21 6
-----CTGAGAGAAGTAGCAGTTA-----mirL 19 5
-----GCTGAGAGAAGTAGCAGTTA-----mirL 20 4
-----TGCTGAGAGAAGTAGCAGTTACTT-----mirL 24 3
-----TGAGAGAAGTAGCAGTTAC-----mirL 19 3
-----GCTGAGAGAAGTAGCAGTTACT-----mirL 22 2
-----TGCTGAGAGAAGTAGCAGTTACT-----mirL 23 2
-----CTGAGAGAAGTAGCAGTTACT-----mirL 21 1
-----GCTGAGAGAAGTAGCAGTT-----mirL 19 1
-----GCTGAGAGAAGTAGCAGT-----mirL 18 1
-----CTGAGAGAAGTAGCAGTT-----mirL 18 1
-----TAACTGCAACAGCTCTCAGTAT---mirR 22 1396
-----TAACTGCAACAGCTCTCAGTA---mirR 21 223
-----TAACTGCAACAGCTCTCA-----mirR 18 209
-----AACTGCAACAGCTCTCAGTAT---mirR 21 179
-----CTGCAACAGCTCTCAGTAT---mirR 19 153
-----TAACTGCAACAGCTCTCAGT-----mirR 20 83
-----TAACTGCAACAGCTCTCAG-----mirR 19 71
-----TAACTGCAACAGCTCTCAGTATT--mirR 23 68
-----ACTGCAACAGCTCTCAGTAT---mirR 20 62
-----AACTGCAACAGCTCTCAGTA---mirR 20 30
-----AACTGCAACAGCTCTCAGTATT--mirR 22 15
-----CTGCAACAGCTCTCAGTA---mirR 18 12
-----CTGCAACAGCTCTCAGTATT--mirR 20 8
-----ACTGCAACAGCTCTCAGTA---mirR 19 8
-----AACTGCAACAGCTCTCAGT-----mirR 19 8
-----AACTGCAACAGCTCTCAG-----mirR 18 3
-----TAACTGCAACAGCTCTCAGTATTG- mirR 24 3
-----ACTGCAACAGCTCTCAGT-----mirR 18 3
-----ACTGCAACAGCTCTCAGTATT--mirR 21 2
-----CTGCAACAGCTCTCAGTATTG- mirR 21 1
-----AACTGCAACAGCTCTCAGTATTGT mirR 24 1
-----AACTGCAACAGCTCTCAGTATTG- mirR 23 1

>mmu-mir-697
CCTGGATGTTGGTCTTGACAGGTCTCAGAGGTGACTACCACACATTGAAGGGGTGGCGGTAACATCCTGGTCTGTGGAGACTGT species len reads
CCTGGATGTTGGTCTTGAC-----morL 19 1

```

```

CCTGGATGTTGGTCTTGACA----- morL 20 1
-----TCTCAGAGGTGACTACCA----- mirL 18 6
-----AGGTCTCAGAGGTGACTAC----- mirL 19 1
-----GGTCTCAGAGGTGACTAC----- mirL 18 1
-----TCAGAGGTGACTACCAACA----- mirL 20 1
-----ACACATTGAAGGGGTGGC----- loop 18 1
-----CACACATTGAAGGGGTGGC----- loop 19 1
-----AACATCCTGGTCCTGTGGAGA---- mirR 21 1179
-----AACATCCTGGTCCTGTGGAGAC--- mirR 22 786
-----AACATCCTGGTCCTGTGGAG---- mirR 20 440
-----AACATCCTGGTCCTGTGG----- mirR 18 122
-----AACATCCTGGTCCTGTGGAGACT-- mirR 23 94
-----AACATCCTGGTCCTGTGGA----- mirR 19 65
-----ACATCCTGGTCCTGTGGAGA---- mirR 20 33
-----ATCCTGGTCCTGTGGAGA---- mirR 18 14
-----ACATCCTGGTCCTGTGGAGAC--- mirR 21 14
-----AACATCCTGGTCCTGTGGAGACTG- mirR 24 13
-----ACATCCTGGTCCTGTGGAG---- mirR 19 10
-----CATCCTGGTCCTGTGGAGA---- mirR 19 10
-----CATCCTGGTCCTGTGGAGAC--- mirR 20 9
-----ATCCTGGTCCTGTGGAGAC--- mirR 19 6
-----ACATCCTGGTCCTGTGGAGACT-- mirR 22 4
-----ACATCCTGGTCCTGTGGA----- mirR 18 3
-----CATCCTGGTCCTGTGGAG---- mirR 18 3
-----ACATCCTGGTCCTGTGGAGACTG- mirR 23 1
-----ACATCCTGGTCCTGTGGAGACTGT mirR 24 1
-----GTAACATCCTGGTCCTGTGGAG---- mirR 22 1
-----TAACATCCTGGTCCTGTGGAGA--- mirR 22 1
-----ATCCTGGTCCTGTGGAGACT-- mirR 20 1

```

>mmu-mir-464

```

AACCTTGTTATGGGGTCTGGGGTAAGGAGTGGTCATCAGGGGTACTACCAAGTTTATTCTGTGAGATAGACACAAAG species len reads
AACCTTGTTATGGGGTCTGGGGTCTGG----- mirL 18 1
---CTTGTTATGGGGTCTGG----- mirL 18 1
--CCTTGTTATGGGGTCTGG----- mirL 19 1
-----TACCAAGTTTATTCTGTGA----- mirR 19 900
-----TACCAAGTTTATTCTGTGAGA----- mirR 21 601
-----TACCAAGTTTATTCTGTGAGATA----- mirR 23 521
-----TACCAAGTTTATTCTGTGAGAT----- mirR 22 250
-----TACCAAGTTTATTCTGTGAG----- mirR 20 227
-----TACCAAGTTTATTCTGTGAGATAG----- mirR 24 91
-----TACCAAGTTTATTCTGTG----- mirR 18 61
-----ACCAAGTTTATTCTGTGA----- mirR 18 42
-----ACCAAGTTTATTCTGTGAGA----- mirR 20 32
-----ACCAAGTTTATTCTGTGAGATA----- mirR 22 25
-----ACCAAGTTTATTCTGTGAG----- mirR 19 9

```

```

-----CCAAGTTTATTCTGTGAGATA----- mirR 21 7
-----CCAAGTTTATTCTGTGAGA----- mirR 19 7
-----ACCAAGTTTATTCTGTGAGAT----- mirR 21 6
-----ACCAAGTTTATTCTGTGAGATAG----- mirR 23 6
-----CAAGTTTATTCTGTGAGA----- mirR 18 5
-----CCAAGTTTATTCTGTGAGAT----- mirR 20 3
-----CCAAGTTTATTCTGTGAGATAG----- mirR 22 2
-----ACCAAGTTTATTCTGTGAGATAGAC----- mirR 25 2
-----CCAAGTTTATTCTGTGAG----- mirR 18 2
-----CCAAGTTTATTCTGTGAGATAGACA----- mirR 25 1
-----CTACCAAGTTTATTCTGTGAGATA----- mirR 24 1
-----CCAAGTTTATTCTGTGAGATAGACAAAAG----- mirR 30 1
-----CTACCAAGTTTATTCTGTGAG----- mirR 21 1

```

>mmu-mir-205

```

AATCCATGGGTCCTTGTCTTCATTCCACCGGAGTCTGTCTTATGCCAACCAGATTTTCAGTGGAGTGAAGCTCAGGAGGCAT species len reads
--TCCATGGGTCCTTGTCT----- morL 18 2
AATCCATGGGTCCTTGTCT----- morL 20 2
---CCATGGGTCCTTGTCTC----- morL 18 1
-----TCCTTCATTCCACCGGAGTCTG----- mirL 22 1220
-----TCCTTCATTCCACCGGAGTCT----- mirL 21 390
-----TCCTTCATTCCACCGGAGTCTGT----- mirL 23 366
-----TCCTTCATTCCACCGGAGTC----- mirL 20 129
-----TCCTTCATTCCACCGGAGTCTGTCT----- mirL 24 69
-----TCCTTCATTCCACCGGAGT----- mirL 19 61
-----CCTTCATTCCACCGGAGTCTG----- mirL 21 46
-----TCCTTCATTCCACCGGAG----- mirL 18 22
-----CCTTCATTCCACCGGAGTCT----- mirL 20 13
-----CCTTCATTCCACCGGAGTCTGT----- mirL 22 12
-----TTCATTCCACCGGAGTCTG----- mirL 19 12
-----TTCATTCCACCGGAGTCT----- mirL 18 7
-----CTTCATTCCACCGGAGTCTG----- mirL 20 6
-----CCTTCATTCCACCGGAGTC----- mirL 19 5
-----CTTCATTCCACCGGAGTCTGT----- mirL 21 5
-----CCTTCATTCCACCGGAGTCTGTCT----- mirL 24 3
-----CTTCATTCCACCGGAGTCT----- mirL 19 2
-----CCTTCATTCCACCGGAGT----- mirL 18 2
-----CTGTCTTATGCCAACCAG----- loop 18 1
-----GATTTTCAGTGGAGTGAAGCTC----- mirR 21 213
-----GATTTTCAGTGGAGTGAAGCT----- mirR 20 90
-----GATTTTCAGTGGAGTGAAGCTCA----- mirR 22 51
-----GATTTTCAGTGGAGTGAAG----- mirR 18 22
-----GATTTTCAGTGGAGTGAAGC----- mirR 19 18
-----GATTTTCAGTGGAGTGAAGCTCAG----- mirR 23 5
-----ATTTTCAGTGGAGTGAAGCTC----- mirR 20 4
-----TTCAGTGGAGTGAAGCTC----- mirR 18 3

```

```

-----AGATTTTCAGTGGAGTGAAG----- mirR 19 2
-----ATTTTCAGTGGAGTGAAGCT----- mirR 19 1
-----TTTCAGTGGAGTGAAGCTCAG----- mirR 21 1
-----GATTTTCAGTGGAGTGAAGCTCAGGAGGCAT mirR 30 1
-----TTCAGTGGAGTGAAGCTCA----- mirR 19 1
-----TTTCAGTGGAGTGAAGCTC----- mirR 19 1

```

>mmu-mir-449b

| Sequence                                                       | species | len | reads |
|----------------------------------------------------------------|---------|-----|-------|
| TAGGCAGTGTGTTAGCTGGCTGCGTTGGGTCAGGCCAGCAGCCACAGCTACCCTGCCACTTC | mirL    | 20  | 921   |
| -AGGCAGTGTGTTAGCTGGC-----                                      | mirL    | 19  | 491   |
| -AGGCAGTGTGTTAGCTGG-----                                       | mirL    | 21  | 206   |
| -AGGCAGTGTGTTAGCTGGCT-----                                     | mirL    | 18  | 84    |
| -AGGCAGTGTGTTAGCTGGCTG-----                                    | mirL    | 22  | 47    |
| --GGCAGTGTGTTAGCTGGC-----                                      | mirL    | 19  | 13    |
| ---GCAGTGTGTTAGCTGGC-----                                      | mirL    | 18  | 12    |
| -AGGCAGTGTGTTAGCTGGCTGC-----                                   | mirL    | 23  | 10    |
| TAGGCAGTGTGTTAGCT-----                                         | mirL    | 18  | 4     |
| ---GCAGTGTGTTAGCTGGCT-----                                     | mirL    | 19  | 3     |
| TAGGCAGTGTGTTAGCTGGCTG-----                                    | mirL    | 23  | 3     |
| TAGGCAGTGTGTTAGCTGGC-----                                      | mirL    | 21  | 3     |
| ----CAGTGTGTTAGCTGGCT-----                                     | mirL    | 18  | 3     |
| --GGCAGTGTGTTAGCTGGCT-----                                     | mirL    | 20  | 2     |
| --GGCAGTGTGTTAGCTGG-----                                       | mirL    | 18  | 2     |
| TAGGCAGTGTGTTAGCTGG-----                                       | mirL    | 20  | 2     |
| ----CAGTGTGTTAGCTGGCTGC-----                                   | mirL    | 20  | 1     |
| TAGGCAGTGTGTTAGCTGGCT-----                                     | mirL    | 22  | 1     |
| -AGGCAGTGTGTTAGCTGGCTGCG-----                                  | mirL    | 24  | 1     |
| -----GCTGCGTTGGGTCAGGCC-----                                   | loop    | 18  | 3     |
| -----CAGCCACAGCTACCCTGCCACT--                                  | mirR    | 22  | 740   |
| -----CAGCCACAGCTACCCTGCCACTT-                                  | mirR    | 23  | 94    |
| -----CAGCCACAGCTACCCTGCCAC---                                  | mirR    | 21  | 43    |
| -----CAGCCACAGCTACCCTGCCACTTC                                  | mirR    | 24  | 22    |
| -----CAGCCACAGCTACCCTGC-----                                   | mirR    | 18  | 20    |
| -----AGCCACAGCTACCCTGCCACT--                                   | mirR    | 21  | 15    |
| -----CAGCCACAGCTACCCTGCCA---                                   | mirR    | 20  | 11    |
| -----CAGCCACAGCTACCCTGCC-----                                  | mirR    | 19  | 9     |
| -----CCACAGCTACCCTGCCACT--                                     | mirR    | 19  | 3     |
| -----GCCACAGCTACCCTGCCA---                                     | mirR    | 18  | 2     |
| -----GCAGCCACAGCTACCCTG-----                                   | mirR    | 18  | 1     |
| -----AGCCACAGCTACCCTGCCACTTC                                   | mirR    | 23  | 1     |
| -----CAGCAGCCACAGCTACCC-----                                   | mirR    | 18  | 1     |
| -----CCACAGCTACCCTGCCACTT-                                     | mirR    | 20  | 1     |
| -----AGCCACAGCTACCCTGCCAC---                                   | mirR    | 20  | 1     |
| -----GCCACAGCTACCCTGCCAC---                                    | mirR    | 19  | 1     |
| -----AGCCACAGCTACCCTGCCA---                                    | mirR    | 19  | 1     |

-----AGCCACAGCTACCCTGCCACTT- mirR 22 1  
-----GCCACAGCTACCCTGCCACT-- mirR 20 1

>mmu-mir-1955

| ACAAGTCCCAGGATGCACTGCAGCTTTTTCTTAACCTCAGATAAGAGCATTGCATGCTGGGACATGT | species | len  | reads |
|---------------------------------------------------------------------|---------|------|-------|
| ---AGTCCCAGGATGCACTGCAGCTTTT-----                                   | mirL 25 | 1561 |       |
| ---AGTCCCAGGATGCACTGCAGCTTTTT-----                                  | mirL 26 | 420  |       |
| ---AGTCCCAGGATGCACTGCAGCTTT-----                                    | mirL 24 | 281  |       |
| ---AGTCCCAGGATGCACTGCAGCTT-----                                     | mirL 23 | 111  |       |
| ---AGTCCCAGGATGCACTGCAGCT-----                                      | mirL 22 | 104  |       |
| ---AGTCCCAGGATGCACTGC-----                                          | mirL 18 | 51   |       |
| ---AGTCCCAGGATGCACTGCAGC-----                                       | mirL 21 | 51   |       |
| ---GTCCCAGGATGCACTGCAGCTTTT-----                                    | mirL 24 | 32   |       |
| ---CCAGGATGCACTGCAGCTTTT-----                                       | mirL 22 | 20   |       |
| ---TCCCAGGATGCACTGCAGCTTTT-----                                     | mirL 23 | 14   |       |
| ---CCAGGATGCACTGCAGCTTTT-----                                       | mirL 23 | 8    |       |
| ---GTCCCAGGATGCACTGCAGCTTT-----                                     | mirL 23 | 8    |       |
| ---AAGTCCCAGGATGCACTGCAGCTTTT-----                                  | mirL 26 | 6    |       |
| ---GTCCCAGGATGCACTGCAGCTTTTT-----                                   | mirL 25 | 5    |       |
| ---CCAGGATGCACTGCAGCT-----                                          | mirL 19 | 4    |       |
| ---CCAGGATGCACTGCAGCTT-----                                         | mirL 20 | 4    |       |
| ---CCAGGATGCACTGCAGCTTT-----                                        | mirL 21 | 3    |       |
| ---TCCCAGGATGCACTGCAGCTT-----                                       | mirL 21 | 2    |       |
| ---TCCCAGGATGCACTGCAGCTTT-----                                      | mirL 22 | 2    |       |
| ---GTCCCAGGATGCACTGCAGCTTTTTC-----                                  | mirL 26 | 2    |       |
| ---TCCCAGGATGCACTGCAGCTTTTT-----                                    | mirL 24 | 2    |       |
| ---GTCCCAGGATGCACTGCA-----                                          | mirL 18 | 1    |       |
| ---AAGTCCCAGGATGCACTGCAGC-----                                      | mirL 22 | 1    |       |
| ACAAGTCCCAGGATGCAC-----                                             | mirL 18 | 1    |       |
| ---AAGTCCCAGGATGCACTGC-----                                         | mirL 19 | 1    |       |
| ---TCCCAGGATGCACTGCAGCT-----                                        | mirL 20 | 1    |       |
| ---GTCCCAGGATGCACTGCAG-----                                         | mirL 19 | 1    |       |
| ---AAGTCCCAGGATGCACTGCAGCTTTTT-----                                 | mirL 27 | 1    |       |
| ---TCCCAGGATGCACTGCAG-----                                          | mirL 18 | 1    |       |
| ---AAGTCCCAGGATGCACTGCAGCTT-----                                    | mirL 24 | 1    |       |
| ---GTCCCAGGATGCACTGCAGCTT-----                                      | mirL 22 | 1    |       |
| -----GAGCATTGCATGCTGGGACATGT                                        | mirR 23 | 20   |       |
| -----GAGCATTGCATGCTGGGAC----                                        | mirR 19 | 10   |       |
| -----GAGCATTGCATGCTGGGACATG-                                        | mirR 22 | 8    |       |
| -----GAGCATTGCATGCTGGGACA--                                         | mirR 20 | 5    |       |
| -----GAGCATTGCATGCTGGGACAT--                                        | mirR 21 | 3    |       |
| -----GAGCATTGCATGCTGGGA----                                         | mirR 18 | 1    |       |
| -----AGAGCATTGCATGCTGGGACAT--                                       | mirR 22 | 1    |       |
| -----AGAGCATTGCATGCTGGGACATG-                                       | mirR 23 | 1    |       |
| -----TAAGAGCATTGCATGCTG-----                                        | mirR 18 | 1    |       |



>mmu-mir-677

```
TTTCTTTTGAGAGTGCTTGAGCCTTCAGTGATGATTAGCTTCTGACTTTCGTTCTCTGAATTTGCTGAAGCCAGATGCCGTTCTGAGAAGGGGAAAATGGACAGAAGTGAACATTTTGAAGGCTGTTAATTTGGGAA
---CTTTTGAGAGTGCTTGAGCC---
TTTCTTTTGAGAGTGCTTGA-----
-----TTCAGTGATGATTAGCTTCTG-----
-----TTCAGTGATGATTAGCTTCTGA-----
-----TTCAGTGATGATTAGCTTCT-----
-----AGTGATGATTAGCTTCTGA-----
-----TCAGTGATGATTAGCTTCTG-----
-----AGTGATGATTAGCTTCTG-----
-----TTCAGTGATGATTAGCTTCTGAC-----
-----TTCAGTGATGATTAGCTTCT-----
-----TCAGTGATGATTAGCTTCTGA-----
-----TCAGTGATGATTAGCTTCT-----
-----CAGTGATGATTAGCTTCTG-----
-----CAGTGATGATTAGCTTCTGA-----
-----TTCAGTGATGATTAGCTTCTGACT-----
-----CTTCAGTGATGATTAGCTTCTG-----
-----TCAGTGATGATTAGCTTCT-----
-----CTTCAGTGATGATTAGCTTCTGA-----
-----TTCAGTGATGATTAGCTT-----
-----CAGTGATGATTAGCTTCT-----
-----AGTGATGATTAGCTTCTGAC-----
-----TCAGTGATGATTAGCTTCTGAC-----
-----CTTCAGTGATGATTAGCTTCTGAC-----
-----CTTCAGTGATGATTAGCT-----
-----TCAGTGATGATTAGCTTCTGACT-----
-----GCCTTCAGTGATGATTAGCTTCTG-----
-----CTTCAGTGATGATTAGCTT-----
-----CCTTCAGTGATGATTAGCT-----
-----CTTCAGTGATGATTAGCTTCT-----
```

>mmu-mir-669g

```
CATGTGTGCTTACTTGTATGTGATTGTATGTGTTGACATGATATACATAACATAAACACACCGTGTATCTGCAAGCACACACACAGGAAAAATGCATTCATTTATACGTTTGAATGATATGTGACTTAAAGTTTT sp
CATGTGTGCTTACTTGTAT----- mo
---TGTGCTTACTTGTATGTGC----- mo
---GTGCTTACTTGTATGTGC----- mo
-ATGTGTGCTTACTTGTAT----- mo
-----TGCATTGTATGTGTTGACATGA----- mi
-----TGCATTGTATGTGTTGACATGAT----- mi
-----TGCATTGTATGTGTTGACATG----- mi
-----GCATTGTATGTGTTGACATGA----- mi
-----TGCATTGTATGTGTTGACATGATA----- mi
```

```

-----TGCATTGTATGTGTTGACAT----- mi
-----ATTGTATGTGTTGACATGA----- mi
-----GCATTGTATGTGTTGACATGAT----- mi
-----TGCATTGTATGTGTTGAC----- mi
-----GCATTGTATGTGTTGACATG----- mi
-----CATTGTATGTGTTGACATGA----- mi
-----GTGCATTGTATGTGTTGA----- mi
-----TGCATTGTATGTGTTGACA----- mi
-----ATTGTATGTGTTGACATGAT----- mi
-----GCATTGTATGTGTTGACAT----- mi
-----ATTGTATGTGTTGACATG----- mi
-----GCATTGTATGTGTTGACATGATA----- mi
-----GTGCATTGTATGTGTTGACATGA----- mi
-----CATTGTATGTGTTGACATG----- mi
-----GTGCATTGTATGTGTTGAC----- mi
-----GTGCATTGTATGTGTTGACATG----- mi
-----ATTGTATGTGTTGACATGATA----- mi
-----GTGCATTGTATGTGTTGACATGAT----- mi
-----CATTGTATGTGTTGACATGAT----- mi
-----ATTCATTTATACGTTTGAA----- mi
-----ATTCATTTATACGTTTGA----- mi
-----TTCATTTATACGTTTGAA----- mi
-----CATTCATTTATACGTTTG----- mi
-----CATTCATTTATACGTTTGA----- mi
-----CATTCATTTATACGTTTGAA----- mi
-----GCATTCATTTATACGTTTG----- mi
-----TGCATTCATTTATACGTTTGA----- mi
-----TATGTGACTTAAAGTTTT----- mo
-----ATATGTGACTTAAAGTTTT----- mo

```

>mmu-mir-1247

| CGCAGCCCCGGCCGCGGGCGCACCCGTCCCCTTCGTCCTCTGCCCCGGGAACGTCGAGACTGGAGCGCCCCGAACTGAGCCACCTTCG | species | len | reads |
|------------------------------------------------------------------------------------------|---------|-----|-------|
| CGCAGCCCCGGCCGCGGGC-----                                                                 | morL    | 20  | 5     |
| -----GCCCGGGCCGCGGGCGC-----                                                              | morL    | 18  | 1     |
| -GCAGCCCCGGCCGCGGG-----                                                                  | morL    | 18  | 1     |
| -----ACCCGTCCCCTTCGTCCTTCGTC-----                                                        | mirL    | 23  | 781   |
| -----ACCCGTCCCCTTCGTCCTTCGTC-----                                                        | mirL    | 22  | 761   |
| -----ACCCGTCCCCTTCGTCCTTCGTC-----                                                        | mirL    | 21  | 333   |
| -----ACCCGTCCCCTTCGTCCTTCGTC-----                                                        | mirL    | 19  | 218   |
| -----ACCCGTCCCCTTCGTCCTTCGTC-----                                                        | mirL    | 18  | 207   |
| -----ACCCGTCCCCTTCGTCCTTCGTC-----                                                        | mirL    | 24  | 174   |
| -----ACCCGTCCCCTTCGTCCTTCGTC-----                                                        | mirL    | 20  | 170   |
| -----CACCCGTCCCCTTCGTCCTTCGTC-----                                                       | mirL    | 20  | 5     |
| -----CCGTCCCCTTCGTCCTTCGTC-----                                                          | mirL    | 19  | 3     |
| -----CACCCGTCCCCTTCGTCCTTCGTC-----                                                       | mirL    | 23  | 2     |
| -----CCCGTCCCCTTCGTCCTTCGTC-----                                                         | mirL    | 20  | 2     |

```
-----CACCCGTCCTCGTCCCG----- mirL 21 1
-----CCCGTCCCCTCGTCCCGGA----- mirL 21 1
-----CCCGTCCCCTCGTCCCG----- mirL 18 1
-----GCACCCGTCCTCGTCCCG----- mirL 18 1
-----CACCCGTCCTCGTCCCG----- mirL 19 1
-----CCCGTCCCCTCGTCCCG----- mirL 19 1
-----CACCCGTCCTCGTCCCGGACG----- mirL 25 1
-----CCGTCCCCTCGTCCCG----- mirL 18 1
-----GACGTTGCTCTCTGCCCC----- loop 18 3
-----CGGGAACGTCGAGACTGGAGC----- mirR 21 4
-----CGGGAACGTCGAGACTGGAGCG----- mirR 22 2
-----CGGGAACGTCGAGACTGGAG----- mirR 20 1
-----CCGGAACGTCGAGACTG----- mirR 18 1
-----CCGGAACGTCGAGACTGGAG----- mirR 22 1
-----GCCCGAAGTCCAGCCACT----- morR 18 1
-----CCGAAGTCCAGCCACTTCG morR 19 1

>mmu-mir-196a-1
AGCCGGGACTGTTGAGTGAAGTAGGTAGTTTCATGTTGTTGGGCTGGCTTTCTGAACACAACGACATCAAAACACCTGATTCATGGCAGTTACTGCTTCTTGCTTAGCTGGGGGAGTTCGGTAGGGTTCCTCAGGACTGG
--CCGGGACTGTTGAGTGAAG-----
--GCCGGGACTGTTGAGTGAA-----
AGCCGGGACTGTTGAGTG-----
-----TAGGTAGTTTCATGTTGTTGG-----
-----TAGGTAGTTTCATGTTGTT-----
-----TAGGTAGTTTCATGTTGTTG-----
-----TAGGTAGTTTCATGTTGTTG-----
-----GGTAGTTTCATGTTGTTGG-----
-----AGGTAGTTTCATGTTGTTGG-----
-----GTAGTTTCATGTTGTTGG-----
-----TAGGTAGTTTCATGTTGTTGGC-----
-----AGGTAGTTTCATGTTGTT-----
-----AGGTAGTTTCATGTTGTTG-----
-----AGGTAGTTTCATGTTGTTG-----
-----TAGGTAGTTTCATGTTGTTGGGCC-----
-----GGTAGTTTCATGTTGTTGG-----
-----GGTAGTTTCATGTTGTTGGC-----
-----GGTAGTTTCATGTTGTTGGCCT-----
-----GTAGTTTCATGTTGTTGG-----
-----AGGTAGTTTCATGTTGTTGGGCC-----
-----GTAGTTTCATGTTGTTGGC-----
-----GGTAGTTTCATGTTGTTGGGCC-----
-----GTAGTTTCATGTTGTTGGCCT-----
-----GTAGTTTCATGTTGTTGGC-----
-----AGGTAGTTTCATGTTGTTGGC-----
```

```

-----AGTAGGTAGTTTCATGTTG-----
-----TAGGGTTCCTCAGGACTG-----
-----TAGGGTTCCTCAGGACTGG-----
-----TAGGGTTCCTCAGGACTGG-----
-----AGGGTTCCTCAGGACTGG-----

```

>mmu-mir-302b

| Sequence                                                                                            | species | len | reads |
|-----------------------------------------------------------------------------------------------------|---------|-----|-------|
| TGTGGGTGGGTTCCCTTCAACTTTAACATGGGAATGCTTTCTGTCTCATCGAAGAGTAAGTGCTTCCATGTTTTAGTAGAAGTGAATTCAAGAACTCTG | morL    | 19  | 1     |
| --TGGGTGGGTTCCCTTCAAC-----                                                                          | morL    | 18  | 1     |
| TGTGGGTGGGTTCCCTTCAAC-----                                                                          | morL    | 18  | 1     |
| ---GGGTGGGTTCCCTTCAAC-----                                                                          | morL    | 18  | 1     |
| -----ACTTTAACATGGGAATGCTTTCT-----                                                                   | mirL    | 23  | 776   |
| -----ACTTTAACATGGGAATGCTTTCT-----                                                                   | mirL    | 22  | 153   |
| -----ACTTTAACATGGGAATGCTTTCTG-----                                                                  | mirL    | 24  | 46    |
| -----ACTTTAACATGGGAATGCTTT-----                                                                     | mirL    | 21  | 30    |
| -----ACTTTAACATGGGAATGCTT-----                                                                      | mirL    | 20  | 15    |
| -----TTAACATGGGAATGCTTTCT-----                                                                      | mirL    | 20  | 7     |
| -----ACTTTAACATGGGAATGC-----                                                                        | mirL    | 18  | 7     |
| -----ACTTTAACATGGGAATGCTTTCTGTC-----                                                                | mirL    | 26  | 7     |
| -----CTTTAACATGGGAATGCTTTCT-----                                                                    | mirL    | 22  | 6     |
| -----TTAACATGGGAATGCTTTCT-----                                                                      | mirL    | 21  | 2     |
| -----CTTTAACATGGGAATGCTTTCT-----                                                                    | mirL    | 21  | 1     |
| -----AACTTTAACATGGGAATGCTTTCT-----                                                                  | mirL    | 24  | 1     |
| -----TTAACATGGGAATGCTTT-----                                                                        | mirL    | 19  | 1     |
| -----AACTTTAACATGGGAATGCTTTC-----                                                                   | mirL    | 23  | 1     |
| -----CTTTAACATGGGAATGCTTT-----                                                                      | mirL    | 20  | 1     |
| -----CTTTAACATGGGAATGCTT-----                                                                       | mirL    | 19  | 1     |
| -----TCTGTCTCATCGAAGAGTA-----                                                                       | loop    | 19  | 2     |
| -----TGCTTCATCGAAGAGTAA-----                                                                        | loop    | 18  | 1     |
| -----TGTCTCATCGAAGAGTAAG-----                                                                       | loop    | 19  | 1     |
| -----AAGTGCTTCCATGTTTTAGTAG-----                                                                    | mirR    | 22  | 872   |
| -----AAGTGCTTCCATGTTTTAGTAGA-----                                                                   | mirR    | 23  | 129   |
| -----AAGTGCTTCCATGTTTTAGTA-----                                                                     | mirR    | 21  | 114   |
| -----AGTGCTTCCATGTTTTAGTAG-----                                                                     | mirR    | 21  | 88    |
| -----TAAGTGCTTCCATGTTTTAGTAG-----                                                                   | mirR    | 23  | 83    |
| -----GTGCTTCCATGTTTTAGTAG-----                                                                      | mirR    | 20  | 70    |
| -----TGCTTCCATGTTTTAGTAG-----                                                                       | mirR    | 19  | 53    |
| -----AAGTGCTTCCATGTTTTAGTAGAA-----                                                                  | mirR    | 24  | 27    |
| -----AAGTGCTTCCATGTTTTA-----                                                                        | mirR    | 18  | 27    |
| -----TAAGTGCTTCCATGTTTTA-----                                                                       | mirR    | 19  | 24    |
| -----AAGTGCTTCCATGTTTTAG-----                                                                       | mirR    | 19  | 17    |
| -----TAAGTGCTTCCATGTTTTAGTAGA-----                                                                  | mirR    | 24  | 13    |
| -----TGCTTCCATGTTTTAGTA-----                                                                        | mirR    | 18  | 12    |
| -----AAGTGCTTCCATGTTTTAGT-----                                                                      | mirR    | 20  | 11    |
| -----AGTGCTTCCATGTTTTAGTAGA-----                                                                    | mirR    | 22  | 11    |
| -----GTGCTTCCATGTTTTAGTAGA-----                                                                     | mirR    | 21  | 10    |

```

-----AGTGCTTCCATGTTTTAGTA----- mirR 20 7
-----TAAGTGCTTCCATGTTTTAG----- mirR 20 5
-----TAAGTGCTTCCATGTTTTAGTA----- mirR 22 4
-----GTGCTTCCATGTTTTAGTA----- mirR 19 4
-----GTAAGTGCTTCCATGTTTTA----- mirR 20 3
-----TAAGTGCTTCCATGTTTTAGT----- mirR 21 3
-----TGCTTCCATGTTTTAGTAGA----- mirR 20 3
-----AGTGCTTCCATGTTTTAG----- mirR 18 1
-----AGTGCTTCCATGTTTTAGTAGAAG----- mirR 24 1
-----TAAGTGCTTCCATGTTTTAGTAGAA----- mirR 25 1
-----AGTGCTTCCATGTTTTAGT----- mirR 19 1
-----GTGCTTCCATGTTTTAGTAGAA----- mirR 22 1
-----TGAATTCAAGAAACTCTG morR 18 1
-----GAAGTGAATTCAAGAAACT--- morR 19 1
-----GTGAATTCAAGAAACTCT- morR 18 1

```

>mmu-mir-141

| Sequence                                                                            | species | len | reads |
|-------------------------------------------------------------------------------------|---------|-----|-------|
| TCCATCTTCCAGTGCAGTGTGGATGGTTGAAGTATGAAGCTCCTAACACTGTCTGGTAAAGATGGCCCCGGGTCAGTTCCTTC | mirL    | 20  | 685   |
| --CATCTTCCAGTGCAGTGTGG-----                                                         | mirL    | 21  | 157   |
| --CATCTTCCAGTGCAGTGTGG-----                                                         | mirL    | 22  | 135   |
| --CATCTTCCAGTGCAGTGTGGA-----                                                        | mirL    | 18  | 96    |
| --CATCTTCCAGTGCAGTGT-----                                                           | mirL    | 19  | 69    |
| ---ATCTTCCAGTGCAGTGTG-----                                                          | mirL    | 19  | 42    |
| TCCATCTTCCAGTGCAGTGTGG-----                                                         | mirL    | 22  | 38    |
| ----TCTTCCAGTGCAGTGTG-----                                                          | mirL    | 18  | 30    |
| ----CTTCCAGTGCAGTGTGGA-----                                                         | mirL    | 19  | 24    |
| TCCATCTTCCAGTGCAGTGTGG-----                                                         | mirL    | 23  | 17    |
| ----CTTCCAGTGCAGTGTGG-----                                                          | mirL    | 18  | 16    |
| ----TCTTCCAGTGCAGTGTGGA-----                                                        | mirL    | 20  | 14    |
| ----TCTTCCAGTGCAGTGTGG-----                                                         | mirL    | 19  | 13    |
| --CATCTTCCAGTGCAGTGTGGAT-----                                                       | mirL    | 23  | 12    |
| TCCATCTTCCAGTGCAGTGT-----                                                           | mirL    | 20  | 7     |
| TCCATCTTCCAGTGCAGTGT-----                                                           | mirL    | 21  | 6     |
| ---ATCTTCCAGTGCAGTGTGGA-----                                                        | mirL    | 21  | 6     |
| --CATCTTCCAGTGCAGTGTGGATG-----                                                      | mirL    | 24  | 5     |
| --ATCTTCCAGTGCAGTGTGG-----                                                          | mirL    | 20  | 4     |
| ---ATCTTCCAGTGCAGTGT-----                                                           | mirL    | 18  | 4     |
| TCCATCTTCCAGTGCAGTGTGGA-----                                                        | mirL    | 24  | 4     |
| ----CTTCCAGTGCAGTGTGGAT-----                                                        | mirL    | 20  | 3     |
| TCCATCTTCCAGTGCAGT-----                                                             | mirL    | 18  | 1     |
| -CCATCTTCCAGTGCAGT-----                                                             | mirL    | 19  | 1     |
| TCCATCTTCCAGTGCAGTGTGGAT-----                                                       | mirL    | 25  | 1     |
| -----TGTTGAAGTATGAAGCT-----                                                         | loop    | 18  | 2     |
| -----TAACACTGTCTGGTAAAGATGG-----                                                    | mirR    | 22  | 305   |
| -----AACACTGTCTGGTAAAGATGG-----                                                     | mirR    | 21  | 221   |

```

-----TAACACTGTCTGGTAAAGATG----- mirR 21 216
-----AACACTGTCTGGTAAAGATGGC----- mirR 22 98
-----TAACACTGTCTGGTAAAGAT----- mirR 20 75
-----TAACACTGTCTGGTAAAGATGGC----- mirR 23 72
-----TAACACTGTCTGGTAAAGATGGCCC----- mirR 25 63
-----TAACACTGTCTGGTAAAGATGGCC----- mirR 24 51
-----TAACACTGTCTGGTAAAGA----- mirR 19 35
-----AACACTGTCTGGTAAAGATG----- mirR 20 31
-----AACACTGTCTGGTAAAGATGGCC----- mirR 23 16
-----ACACTGTCTGGTAAAGATGG----- mirR 20 16
-----AACACTGTCTGGTAAAGATGGCCC----- mirR 24 15
-----AACACTGTCTGGTAAAGA----- mirR 18 12
-----AACACTGTCTGGTAAAGAT----- mirR 19 8
-----CACTGTCTGGTAAAGATGG----- mirR 19 4
-----CACTGTCTGGTAAAGATGGC----- mirR 20 3
-----ACACTGTCTGGTAAAGATGGC----- mirR 21 2
-----CTAACACTGTCTGGTAAAGATG----- mirR 22 1
-----TCCTAACACTGTCTGGTAA----- mirR 19 1
-----TCCTAACACTGTCTGGTAAAG----- mirR 21 1
-----ACACTGTCTGGTAAAGATG----- mirR 19 1
-----CCCCGGGTCAAGTTCTTTC morR 18 2

```

>mmu-mir-450a-1

| Sequence                                                                                         | species | len | reads |
|--------------------------------------------------------------------------------------------------|---------|-----|-------|
| CCAAAGAGAGATACTGAGCTGTTTTGCGATGTGTTTCCTAATATGTGCTATAAATATATTGGGAACATTTTCATAAATAGCTTTGTGCAATACACA | morL    | 18  | 2     |
| -----AGAGATACTGAGCTGTTT-----                                                                     | morL    | 19  | 1     |
| CCAAAGAGAGATACTGAGC-----                                                                         | morL    | 18  | 1     |
| ---AGAGATACTGAGCTGT-----                                                                         | morL    | 18  | 1     |
| -CAAAGAGAGATACTGAGC-----                                                                         | morL    | 18  | 1     |
| -----GAGATACTGAGCTGTTTT-----                                                                     | morL    | 18  | 1     |
| TTTTGCGATGTGTTTCCTAA-----                                                                        | mirL    | 19  | 487   |
| -----TTTTGCGATGTGTTTCCTAA-----                                                                   | mirL    | 20  | 340   |
| -----TTTTGCGATGTGTTTCCTAATAT-----                                                                | mirL    | 22  | 272   |
| -----TTTTGCGATGTGTTTCCTAAT-----                                                                  | mirL    | 20  | 264   |
| -----TTTTGCGATGTGTTTCCTA-----                                                                    | mirL    | 18  | 233   |
| -----TTTTGCGATGTGTTTCCTA-----                                                                    | mirL    | 19  | 131   |
| -----TTTGCGATGTGTTTCCTAA-----                                                                    | mirL    | 18  | 111   |
| -----TTTTGCGATGTGTTTCCTAAT-----                                                                  | mirL    | 21  | 106   |
| -----TTTTGCGATGTGTTTCCTAATA-----                                                                 | mirL    | 21  | 106   |
| -----TTTTGCGATGTGTTTCCT-----                                                                     | mirL    | 18  | 42    |
| -----TTTGCGATGTGTTTCCTAAT-----                                                                   | mirL    | 19  | 41    |
| -----TTGCGATGTGTTTCCTAAT-----                                                                    | mirL    | 18  | 39    |
| -----TTTTGCGATGTGTTTCCTAATA-----                                                                 | mirL    | 22  | 38    |
| -----TGCGATGTGTTTCCTAATA-----                                                                    | mirL    | 18  | 30    |
| -----TTTGCGATGTGTTTCCTAATAT-----                                                                 | mirL    | 21  | 21    |
| -----TTTTGCGATGTGTTTCCTAATATG-----                                                               | mirL    | 23  | 17    |
| -----TTTTGCGATGTGTTTCCTAATAT-----                                                                | mirL    | 23  | 15    |

```

-----TTTGGCGATGTGTTCCCTAATA----- mirL 20 15
-----TGCGATGTGTTCCCTAATAT----- mirL 19 14
-----TTGCGATGTGTTCCCTAATA----- mirL 19 11
-----TTTTGCGATGTGTTCCCTAATATGT----- mirL 24 5
-----TTGCGATGTGTTCCCTAATAT----- mirL 20 4
-----TTTGGCGATGTGTTCCCTAATATG----- mirL 22 4
-----GTTTTTGGCGATGTGTTCCCTA----- mirL 20 3
-----TGTTTTTGGCGATGTGTTCC----- mirL 18 1
-----TTTGGCGATGTGTTCCCTAATATGTGCT----- mirL 26 1
-----TTTTTGGCGATGTGTTCCCTAATATG----- mirL 24 1
-----GTTTTTGGCGATGTGTTCCCTAAT----- mirL 22 1
-----TAATATGTGCTATAAATA----- loop 18 1
-----ATTGGGAACATTTTGCATAAA----- mirR 21 33
-----ATTGGGAACATTTTGCATAA----- mirR 20 18
-----TATTGGGAACATTTTGCATAA----- mirR 21 8
-----ATTGGGAACATTTTGCATAAAAT----- mirR 22 8
-----ATTGGGAACATTTTGCATA----- mirR 19 6
-----ATTGGGAACATTTTGCATAAATA----- mirR 23 5
-----TTGGGAACATTTTGCATAAA----- mirR 20 4
-----TTGGGAACATTTTGCATA----- mirR 18 2
-----TATTGGGAACATTTTGCATA----- mirR 20 1
-----ATATTGGGAACATTTTGC----- mirR 18 1
-----TATTGGGAACATTTTGCATAAAAT----- mirR 23 1
-----ATTGGGAACATTTTGCATAAATAG----- mirR 24 1
-----TATTGGGAACATTTTGCATAAA----- mirR 22 1
-----TGGGAACATTTTGCATAAA----- mirR 19 1
-----GGGAACATTTTGCATAAA----- mirR 18 1
-----AAATAGCTTTGTGTCAAT----- morR 18 1
-----GCTTTGTGTCAATACACA morR 18 1

```

>mmu-mir-673

```

GGTCTGGCTTTGGAGCCTGAGGGGCTCACAGCTCTGGTCCTTGAGCTCCAGAGAAAATGTTGCTCCGGGGCTGAGTTCTGTGCACCCCCCTTGCCCTCCACACTCCCCG species len reads
GGTCTGGCTTTGGAGCCTGAGGGG----- morL 24 2
-GTCTGGCTTTGGAGCCTGAGGGG----- morL 24 1
---CTGGCTTTGGAGCCTGAGGGG----- morL 21 1
-----CTCACAGCTCTGGTCCTTGGA----- mirL 21 537
-----CTCACAGCTCTGGTCCTTGAG----- mirL 22 458
-----CTCACAGCTCTGGTCCTTGAGC----- mirL 23 374
-----CTCACAGCTCTGGTCCTTGG----- mirL 20 149
-----CTCACAGCTCTGGTCCTTGAGCT----- mirL 24 103
-----CTCACAGCTCTGGTCCTT----- mirL 18 92
-----CTCACAGCTCTGGTCCTTG----- mirL 19 79
-----TCACAGCTCTGGTCCTTGAG----- mirL 21 15
-----TCACAGCTCTGGTCCTTGAGC----- mirL 22 11
-----TCACAGCTCTGGTCCTTGA----- mirL 20 10
-----CACAGCTCTGGTCCTTGGA----- mirL 19 9

```

```

-----ACAGCTCTGGTCCTTGGAG----- mirL 19 8
-----TCACAGCTCTGGTCCTTGG----- mirL 19 6
-----TCACAGCTCTGGTCCTTGG----- mirL 18 5
-----TCACAGCTCTGGTCCTTGGAGCT----- mirL 23 4
-----TCACAGCTCTGGTCCTTGGAGCTC----- mirL 24 4
-----CACAGCTCTGGTCCTTGGAG----- mirL 20 2
-----CACAGCTCTGGTCCTTGGAGCT----- mirL 22 1
-----GCTCACAGCTCTGGTCCTTGG----- mirL 21 1
-----GCTCACAGCTCTGGTCCTTGG----- mirL 22 1
-----ACAGCTCTGGTCCTTGG----- mirL 18 1
-----CACAGCTCTGGTCCTTGGAGCTC----- mirL 23 1
-----CACAGCTCTGGTCCTTGG----- mirL 18 1
-----ACAGCTCTGGTCCTTGGAGCT----- mirL 21 1
-----GCTCACAGCTCTGGTCCT----- mirL 18 1
-----CTCCAGAGAAAATGTTGCT----- loop 19 1
-----GCTCCAGAGAAAATGTTG----- loop 18 1
-----TCCAGAGAAAATGTTGCT----- loop 18 1
-----GGAGCTCCAGAGAAAATGT----- loop 19 1
-----AGCTCCAGAGAAAATGTTGC----- loop 20 1
-----AGCTCCAGAGAAAATGTTG----- loop 19 1
-----TCCGGGGCTGAGTTCTGTGCACC----- mirR 23 161
-----TCCGGGGCTGAGTTCTGTGCAC----- mirR 22 149
-----TCCGGGGCTGAGTTCTGTGCACCC----- mirR 24 57
-----TCCGGGGCTGAGTTCTGTGCAC----- mirR 21 45
-----TCCGGGGCTGAGTTCTGTGC----- mirR 20 43
-----TCCGGGGCTGAGTTCTGT----- mirR 18 13
-----CCGGGGCTGAGTTCTGTGCAC----- mirR 21 8
-----TCCGGGGCTGAGTTCTGTG----- mirR 19 7
-----GGGGCTGAGTTCTGTGCACC----- mirR 20 6
-----CCGGGGCTGAGTTCTGTGCACC----- mirR 22 6
-----CGGGGCTGAGTTCTGTGCAC----- mirR 20 5
-----CGGGGCTGAGTTCTGTGCACCC----- mirR 22 4
-----GGGGCTGAGTTCTGTGCAC----- mirR 19 4
-----CCGGGGCTGAGTTCTGTGCACCC----- mirR 23 4
-----GGGGCTGAGTTCTGTGCACCC----- mirR 21 3
-----CCGGGGCTGAGTTCTGTGCAC----- mirR 20 2
-----CGGGGCTGAGTTCTGTGCACC----- mirR 21 2
-----CTCCGGGGCTGAGTTCTGTGC----- mirR 21 1
-----GGGGCTGAGTTCTGTGCAC----- mirR 18 1
-----CTTGCCCTCCACACTCCC-- morR 18 2
-----CCTTGCCCTCCACACTCCC-- morR 20 1
-----CCCTTGCCCTCCACACTCCC-- morR 20 1
-----CTTGCCCTCCACACTCCCCG morR 20 1
-----CCCCCTTGCCCTCCACACT-- morR 19 1
-----CCCTTGCCCTCCACACTC-- morR 18 1
-----CCCCCTTGCCCTCCACA-- morR 18 1

```



```

>mmu-mir-741
AATGTCTCATGTGCATTGATCTACGTAGATTGGTACCTATCATGTAAATCATGTAAGCATGAGAGATGCCATTCTATGTAGATTAAGGCTCATAACATTCTT species len reads
AATGTCTCATGTGCATTG-----morL 18 1
AATGTCTCATGTGCATTGATC-----morL 21 1
-ATGTCTCATGTGCATTGA-----morL 18 1
----TCTCATGTGCATTGATCT-----morL 18 1
-----TACGTAGATTGGTACCTAT-----mirL 19 1
-----ATCATGTAAATCATGTAA-----loop 18 1
-----TGAGAGATGCCATTCTATGTAG-----mirR 22 1377
-----TGAGAGATGCCATTCTATGT-----mirR 20 262
-----GAGAGATGCCATTCTATGTAG-----mirR 21 197
-----TGAGAGATGCCATTCTATGTA-----mirR 21 103
-----GAGATGCCATTCTATGTAG-----mirR 19 86
-----TGAGAGATGCCATTCTATGTAGA-----mirR 23 75
-----TGAGAGATGCCATTCTATG-----mirR 19 55
-----AGAGATGCCATTCTATGTAG-----mirR 20 40
-----GAGAGATGCCATTCTATGT-----mirR 19 40
-----TGAGAGATGCCATTCTAT-----mirR 18 27
-----TGAGAGATGCCATTCTATGTAGAT-----mirR 24 21
-----AGAGATGCCATTCTATGT-----mirR 18 17
-----GAGAGATGCCATTCTATGTAGA-----mirR 22 16
-----GAGAGATGCCATTCTATGTA-----mirR 20 15
-----GAGATGCCATTCTATGTA-----mirR 18 15
-----GAGATGCCATTCTATGTAGA-----mirR 20 13
-----AGAGATGCCATTCTATGTA-----mirR 19 13
-----GAGAGATGCCATTCTATG-----mirR 18 7
-----AGAGATGCCATTCTATGTAGA-----mirR 21 7
-----ATGAGAGATGCCATTCTATGTAG-----mirR 23 4
-----GAGATGCCATTCTATGTAGAT-----mirR 21 2
-----GAGATGCCATTCTATGTAGATTAA-----mirR 24 2
-----GCATGAGAGATGCCATTCTATGTAG-----mirR 25 1
-----GAGAGATGCCATTCTATGTAGAT-----mirR 23 1
-----GCATGAGAGATGCCATTC-----mirR 18 1
-----TAAGGCTCATAACATTCT-----morR 18 4
-----TTAAGGCTCATAACATTC-----morR 18 1
-----AAGGCTCATAACATTCTT-----morR 18 1

```

```

>mmu-mir-450a-2
TATTTTTGCGATGTGTTCCCTAATATGTACTATGAGTATATTGGGGATGCTTTGCATTCATGGTTCTGCATCCATCATATGG species len reads
---TTTTGCGATGTGTTCCCTAA-----mirL 19 487
--TTTTGCGATGTGTTCCCTAA-----mirL 20 340
---TTTTGCGATGTGTTCCCTAATAT-----mirL 22 272
---TTTTGCGATGTGTTCCCTAAT-----mirL 20 264
---TTTTGCGATGTGTTCCCTA-----mirL 18 233
--TTTTGCGATGTGTTCCCTA-----mirL 19 131

```

```

-----TTTGCGATGTGTTCCCTAA----- mirL 18 111
---TTTTGCGATGTGTTCCCTAATA----- mirL 21 106
--TTTTTGGCGATGTGTTCCCTAAT----- mirL 21 106
--TTTTTGGCGATGTGTTCCCT----- mirL 18 42
----TTTGCGATGTGTTCCCTAAT----- mirL 19 41
----TTGCGATGTGTTCCCTAAT----- mirL 18 39
--TTTTTGGCGATGTGTTCCCTAATA----- mirL 22 38
----TGCGATGTGTTCCCTAATA----- mirL 18 30
----TTTGCGATGTGTTCCCTAATAT----- mirL 21 21
---TTTTGCGATGTGTTCCCTAATATG----- mirL 23 17
--TTTTTGGCGATGTGTTCCCTAATAT----- mirL 23 15
----TTTGCGATGTGTTCCCTAATA----- mirL 20 15
----TGCGATGTGTTCCCTAATAT----- mirL 19 14
----TTGCGATGTGTTCCCTAATA----- mirL 19 11
---TTTTGCGATGTGTTCCCTAATATGT----- mirL 24 5
----TTTGCGATGTGTTCCCTAATATG----- mirL 22 4
----TTGCGATGTGTTCCCTAATAT----- mirL 20 4
-ATTTTTGCGATGTGTTCCCTA----- mirL 20 3
--TTTTTGGCGATGTGTTCCCTAATATGTAC----- mirL 27 2
TATTTTTGCGATGTGTTCC----- mirL 18 1
-ATTTTTGCGATGTGTTCCCTAAT----- mirL 22 1
----TTTGCGATGTGTTCCCTAATATGTACT----- mirL 26 1
-----ATTGGGGATGCTTTGCATTCA----- mirR 21 8
-----GGGGATGCTTTGCATTCA----- mirR 19 1
-----ATTGGGGATGCTTTGCATTCA----- mirR 22 1
-----ATTGGGGATGCTTTGCATTCC----- mirR 20 1
-----TTCTGCATCCATCATATGG morR 19 1

```

>mmu-mir-295

```

CTTGCTCATCTTGGTGAGACTCAAATGTGGGGCACACTTCTGGACTGTACATAGAAAGTGCTACTACTTTTGAGTCTCTCCTGTGGGCACCATTACAGG species len reads
CTTGCTCATCTTGGTGAG----- morL 18 3
-----ACTCAAATGTGGGGCACACTTC----- mirL 22 657
-----ACTCAAATGTGGGGCACACTT----- mirL 21 461
-----ACTCAAATGTGGGGCACAC----- mirL 19 168
-----ACTCAAATGTGGGGCACACT----- mirL 20 146
-----ACTCAAATGTGGGGCACACA----- mirL 18 85
-----CAAATGTGGGGCACACTTC----- mirL 19 38
-----TCAAATGTGGGGCACACTTC----- mirL 20 23
-----ACTCAAATGTGGGGCACACTTCT----- mirL 23 15
-----TCAAATGTGGGGCACACTT----- mirL 19 13
-----CAAATGTGGGGCACACTT----- mirL 18 12
-----CTCAAATGTGGGGCACACTT----- mirL 20 11
-----CTCAAATGTGGGGCACACTTC----- mirL 21 11
-----CTCAAATGTGGGGCACACT----- mirL 19 6
-----CTCAAATGTGGGGCACAC----- mirL 18 4
-----TCAAATGTGGGGCACACT----- mirL 18 3

```

```

-----TCAAATGTGGGGCACACTTCT----- mirL 21 2
-----GACTCAAATGTGGGGCACACTTC----- mirL 23 2
-----CTCAAATGTGGGGCACACTTCT----- mirL 22 1
-----ACTCAAATGTGGGGCACACTTCTG----- mirL 24 1
-----GAGACTCAAATGTGGGGC----- mirL 18 1
-----TCTGGACTGTACATAGAA----- loop 18 1
-----TCTGGACTGTACATAGAAA----- loop 19 1
-----AAAGTGCTACTACTTTTGAGTCT----- mirR 23 271
-----AGTGCTACTACTTTTGAGTCT----- mirR 21 145
-----GTGCTACTACTTTTGAGTCT----- mirR 20 83
-----AAAGTGCTACTACTTTTGAGTCTC----- mirR 24 50
-----AAGTGCTACTACTTTTGAGTCT----- mirR 22 26
-----AGTGCTACTACTTTTGAGTCT----- mirR 20 22
-----AAAGTGCTACTACTTTTGAGTCT----- mirR 22 22
-----AGTGCTACTACTTTTGAGTCTC----- mirR 22 16
-----AAAGTGCTACTACTTTTGAGTCTCT----- mirR 25 6
-----GTGCTACTACTTTTGAGTCT----- mirR 19 6
-----AAGTGCTACTACTTTTGAGTCT----- mirR 21 6
-----AAAGTGCTACTACTTTTG----- mirR 18 4
-----AAAGTGCTACTACTTTTGAGTCTCTC----- mirR 26 4
-----AGTGCTACTACTTTTGAGT----- mirR 19 4
-----GTGCTACTACTTTTGAGTCTC----- mirR 21 4
-----AAAGTGCTACTACTTTTGAG----- mirR 20 3
-----AGTGCTACTACTTTTGAG----- mirR 18 2
-----AAGTGCTACTACTTTTGA----- mirR 18 2
-----AAGTGCTACTACTTTTGAGT----- mirR 20 1
-----AAGTGCTACTACTTTTGAGTCTCT----- mirR 24 1
-----AAGTGCTACTACTTTTGAG----- mirR 19 1
-----TAGAAAGTGCTACTACTTT----- mirR 19 1
-----AGTGCTACTACTTTTGAGTCTCTCC----- mirR 25 1
-----GAAAGTGCTACTACTTTT----- mirR 18 1
-----AAGTGCTACTACTTTTGAGTCTC----- mirR 23 1
-----CTGTGGGCACCATTACAA----- morR 18 4
-----CTGTGGGCACCATTACAG----- morR 19 2
-----TCTCTCCTGTGGGCACCAT----- morR 19 1
-----CTCCTGTGGGCACCATTCA----- morR 19 1
-----TCTCTCCTGTGGGCACCA----- morR 18 1
-----CTGTGGGCACCATTACAGG morR 20 1

>mmu-mir-105
TGCTCTGTGTGTGCATTTTAGCCAAGTGCTCAGATGCTTGTGGTGGCTGCTTATGCACCACGAATGCTTGAGCATGTGCTATGGTACCTACTTTTACAACATTGCCATCTGCTTCTGGAACAAAGCCATTCATTACT spe
-GCTCTGTGTGTGCATTTT----- mor
TGCTCTGTGTGTGCATTTT----- mor
-----CTGTGTGTGCATTTTAGCC----- mor
TGCTCTGTGTGTGCATTT----- mor
-----CCAAGTGCTCAGATGCTTGTGGT----- mir

```

```

-----CAAGTGCTCAGATGCTTGTGGT----- mir
-----CCAAGTGCTCAGATGCTTGTGGTG----- mir
-----CCAAGTGCTCAGATGCTTGTGG----- mir
-----CCAAGTGCTCAGATGCTT----- mir
-----CCAAGTGCTCAGATGCTTGT----- mir
-----CAAGTGCTCAGATGCTTGTGGTG----- mir
-----CCAAGTGCTCAGATGCTTGTG----- mir
-----AGTGCTCAGATGCTTGTGGT----- mir
-----AGTGCTCAGATGCTTGTGG----- mir
-----CAAGTGCTCAGATGCTTGTGG----- mir
-----CAAGTGCTCAGATGCTTGTG----- mir
-----AAGTGCTCAGATGCTTGTGGT----- mir
-----AAGTGCTCAGATGCTTGTGG----- mir
-----CAAGTGCTCAGATGCTTGT----- mir
-----AGTGCTCAGATGCTTGTGGTG----- mir
-----CCAAGTGCTCAGATGCTTGT----- mir
-----AGTGCTCAGATGCTTGTG----- mir
-----AAGTGCTCAGATGCTTGT----- mir
-----AAGTGCTCAGATGCTTGTG----- mir
-----CAAGTGCTCAGATGCTTGT----- mir
-----GCCAAGTGCTCAGATGCTTGTGGT----- mir
-----AAGTGCTCAGATGCTTGTGGTG----- mir
-----TAGCCAAGTGCTCAGATGCTT----- mir
-----AACAAAGCCATTCATTAC----- mir
-----AACAAAGCCATTCATTACT----- mir

```

>mmu-mir-1963

```

GGTCTGGATAGTAGGGCTGGGACGAGATCATGAGGCCTTCCTGGCCACTGGGAAGGACTCGGCCCTTGTCCCGCAGGTGATGGGTGTCTTTAGTGACGAGGATGTGAAGCA species len reads
-GTCTGGATAGTAGGGCTG----- morL 18 1
GGTCTGGATAGTAGGGCT----- morL 18 1
-----TGGGACGAGATCATGAGGCCTTC----- mirL 23 1463
-----GGGACGAGATCATGAGGCCTTC----- mirL 22 236
-----TGGGACGAGATCATGAGGCCTT----- mirL 22 227
-----TGGGACGAGATCATGAGGCCTTCC----- mirL 24 137
-----GGACGAGATCATGAGGCCTTC----- mirL 21 77
-----GGGACGAGATCATGAGGCCTT----- mirL 21 35
-----TGGGACGAGATCATGAGGCCT----- mirL 21 26
-----GGGACGAGATCATGAGGCCTTCC----- mirL 23 20
-----GACGAGATCATGAGGCCTTC----- mirL 20 17
-----TGGGACGAGATCATGAGGCC----- mirL 20 16
-----GGACGAGATCATGAGGCCTT----- mirL 20 14
-----TGGGACGAGATCATGAGGC----- mirL 19 13
-----TGGGACGAGATCATGAGG----- mirL 18 12
-----GGACGAGATCATGAGGCCTTCC----- mirL 22 7
-----GACGAGATCATGAGGCCTT----- mirL 19 6
-----CTGGGACGAGATCATGAGGCCTTC----- mirL 24 6

```

```

-----GACGAGATCATGAGGCCT----- mirL 18 4
-----GGGACGAGATCATGAGGCC----- mirL 19 4
-----CTGGGACGAGATCATGAGGCCTT----- mirL 23 3
-----GGACGAGATCATGAGGCCT----- mirL 19 3
-----GACGAGATCATGAGGCCTTCC----- mirL 21 3
-----GGGACGAGATCATGAGGCCT----- mirL 20 2
-----GGACGAGATCATGAGGCCTTCCCT----- mirL 23 1
-----GGGACGAGATCATGAGGC----- mirL 18 1
-----GACGAGATCATGAGGCCTTCCCT----- mirL 22 1
-----GGACGAGATCATGAGGCC----- mirL 18 1
-----GACGAGATCATGAGGCCTTCCCTGGC----- mirL 25 1
-----GGGACGAGATCATGAGGCCTTCCCT----- mirL 24 1
-----TGACGAGGATGTGAAGCA----- mirR 18 3
-----AGTGACGAGGATGTGAAGC----- mirR 19 1
-----TAGTGACGAGGATGTGAAG----- mirR 19 1

```

>mmu-mir-147

```

GAACACTCTATGAATCTAGTGGAAACATTTCTGCACAAACTAGATGTTGATGCCAGTGTGCGGAAATGCTTCTGCTACATTTGTAGGGTTGCCT species len reads
GAACACTCTATGAATCTA----- morL 18 1
-----TGGAAACATTTCTGCACA----- mirL 18 60
-----TGGAAACATTTCTGCACAA----- mirL 19 4
-----GTGGAAACATTTCTGCACA----- mirL 19 3
-----TGGAAACATTTCTGCACAAA----- mirL 20 2
-----GTGGAAACATTTCTGCACAA----- mirL 20 2
-----AAACATTTCTGCACAAAC----- mirL 18 1
-----GTGGAAACATTTCTGCACAAACT----- mirL 23 1
-----TGGAAACATTTCTGCACAAAC----- mirL 21 1
-----CTAGATGTTGATGCCAGT----- loop 18 1
-----ACAAACTAGATGTTGATG----- loop 18 1
-----AACTAGATGTTGATGCCA----- loop 18 1
-----GTGTGCGGAAATGCTTCTG----- mirR 19 917
-----GTGTGCGGAAATGCTTCT----- mirR 18 623
-----GTGTGCGGAAATGCTTCTGC----- mirR 20 395
-----GTGTGCGGAAATGCTTCTGCTA----- mirR 22 127
-----GTGTGCGGAAATGCTTCTGCTAC----- mirR 23 65
-----GTGTGCGGAAATGCTTCTGCT----- mirR 21 43
-----GTGCGGAAATGCTTCTGC----- mirR 18 26
-----GTGTGCGGAAATGCTTCTGCTACATTTGTAGGG----- mirR 33 17
-----TGTGCGGAAATGCTTCTGC----- mirR 19 8
-----AGTGTGCGGAAATGCTTCTG----- mirR 20 4
-----TGTGCGGAAATGCTTCTGC----- mirR 18 4
-----AGTGTGCGGAAATGCTTCTGC----- mirR 21 3
-----GTGCGGAAATGCTTCTGCTA----- mirR 20 3
-----AGTGTGCGGAAATGCTTCTGCTA----- mirR 23 2
-----GTGCGGAAATGCTTCTGCT----- mirR 19 2
-----TGTGCGGAAATGCTTCTGCTAC----- mirR 22 1

```

C:\Documents and Settings\hong\Desktop\Hippocampus-total RNA.txt

```
-----GTGCGGAAATGCTTCTGCTAC----- mirR 21 1
-----TGTGCGGAAATGCTTCTGCT----- mirR 20 1
-----AGTGTGCGGAAATGCTTC----- mirR 18 1
-----ACATTTGTAGGGTTTGCC- morR 18 10
-----ACATTTGTAGGGTTTGCT morR 19 4
```

>mmu-mir-701

```
GCATCTACCTTGAGCAAGTAATTAGCCGCTGAAATAGATGGATTGTATAGATGAGGTTCTATCTATTAAAGAGGCTAGCCACTTATCAAGTGCTAACAGCCCA species len reads
GCATCTACCTTGAGCAAG----- morL 18 1
-----TTAGCCGCTGAAATAGATGGA----- mirL 21 802
-----TTAGCCGCTGAAATAGATG----- mirL 19 650
-----TTAGCCGCTGAAATAGATGG----- mirL 20 408
-----TTAGCCGCTGAAATAGATGGAT----- mirL 22 137
-----TTAGCCGCTGAAATAGAT----- mirL 18 62
-----TAGCCGCTGAAATAGATGGA----- mirL 20 46
-----GCCGCTGAAATAGATGGA----- mirL 18 43
-----TAGCCGCTGAAATAGATG----- mirL 18 42
-----AGCCGCTGAAATAGATGGA----- mirL 19 34
-----TAGCCGCTGAAATAGATGG----- mirL 19 26
-----TTAGCCGCTGAAATAGATGGATT----- mirL 23 22
-----AGCCGCTGAAATAGATGG----- mirL 18 17
-----TAGCCGCTGAAATAGATGGAT----- mirL 21 6
-----TTAGCCGCTGAAATAGATGGATTG----- mirL 24 5
-----ATTAGCCGCTGAAATAGATGGA----- mirL 22 4
-----GCCGCTGAAATAGATGGATT----- mirL 20 2
-----GCCGCTGAAATAGATGGAT----- mirL 19 2
-----ATTAGCCGCTGAAATAGATGGAT----- mirL 23 1
-----ATTAGCCGCTGAAATAGATG----- mirL 20 1
-----AGCCGCTGAAATAGATGGATTGTA----- mirL 24 1
-----AGCCGCTGAAATAGATGGAT----- mirL 20 1
-----ATTAGCCGCTGAAATAGAT----- mirL 19 1
-----ATCTATTAAAGAGGCTAGCCAC----- mirR 22 2
-----ATCTATTAAAGAGGCTAG----- mirR 18 2
-----TATCTATTAAAGAGGCTAGCC----- mirR 21 2
-----TATCTATTAAAGAGGCTA----- mirR 18 1
-----TATCTATTAAAGAGGCTAGCCA----- mirR 22 1
-----TATCTATTAAAGAGGCTAGC----- mirR 20 1
-----TATCTATTAAAGAGGCTAGCCAC----- mirR 23 1
-----TCAAGTGCTAACAGCCCA morR 18 2
-----TATCAAGTGCTAACAGCCC- morR 19 1
```

>mmu-mir-759

```
CTGGCAGAGTGCAAACAATTTTACTCAGATCTAAATGTTTGCCTGGCTGTTTAAACATTTAATTTGTTCCAATGGAGGTAGCAGCACAGACTAAGCATGCTAATTAACCTCGGGC species len reads
---GCAGAGTGCAAACAATTTTGA----- mirL 21 1181
---GCAGAGTGCAAACAATTTTG----- mirL 20 479
---GCAGAGTGCAAACAATTTT----- mirL 19 181
```

```

---GCAGAGTGCAAACAATTTTGAC----- mirL 22 134
---GCAGAGTGCAAACAATTT----- mirL 18 68
---GCAGAGTGCAAACAATTTTGACT----- mirL 23 50
---GCAGAGTGCAAACAATTTTGACTC----- mirL 24 44
-----GAGTGCAAACAATTTTGA----- mirL 18 40
-----AGAGTGCAAACAATTTTGA----- mirL 19 16
---CAGAGTGCAAACAATTTTGA----- mirL 20 7
---CAGAGTGCAAACAATTTTG----- mirL 19 4
-----GAGTGCAAACAATTTTGAC----- mirL 19 4
-----AGAGTGCAAACAATTTTGAC----- mirL 20 3
---GGCAGAGTGCAAACAATTTTGA----- mirL 22 3
---AGAGTGCAAACAATTTTG----- mirL 18 3
---GGCAGAGTGCAAACAATT----- mirL 18 2
---CAGAGTGCAAACAATTT----- mirL 18 2
---GGCAGAGTGCAAACAATTTTG----- mirL 21 2
---AGAGTGCAAACAATTTTGACT----- mirL 21 1
-----GAGTGCAAACAATTTTGACTC----- mirL 21 1
---GGCAGAGTGCAAACAATTTTGACT----- mirL 24 1
---GGCAGAGTGCAAACAATTT----- mirL 20 1
CTGGCAGAGTGCAAACAA----- mirL 18 1
---GGCAGAGTGCAAACAATTT----- mirL 19 1
-----GAGTGCAAACAATTTTGACTCA----- mirL 22 1
-----TAGCAGCACAGACTAAGCA----- mirR 19 33
-----TAGCAGCACAGACTAAGC----- mirR 18 24
-----TAGCAGCACAGACTAAGCAT----- mirR 20 7
-----TAGCAGCACAGACTAAGCATG----- mirR 21 2
-----GGTAGCAGCACAGACTAA----- mirR 18 1
-----CAGCACAGACTAAGCATG----- mirR 18 1
-----AGCAGCACAGACTAAGCA----- mirR 18 1
-----ATGCTAATTAAACTCGGGC morR 19 1

```

>mmu-mir-292

```

TGACCTCCAGCCTGTGATACTCAAACCTGGGGGCTCTTTTGGATTTTCATCGGAAGAAAAGTGCCGCCAGGTTTGGAGTGTACCGGTTGAGAACTCAAAC species len reads
TGACCTCCAGCCTGTGATACT----- morL 21 1
-----ACTCAAACCTGGGGGCTCTTTG----- mirL 22 394
-----ACTCAAACCTGGGGGCTCTTT----- mirL 21 93
-----ACTCAAACCTGGGGGCTCTTT----- mirL 20 30
-----ACTCAAACCTGGGGGCTCTT----- mirL 19 25
-----ACTCAAACCTGGGGGCTCTTTGG----- mirL 23 23
-----ACTCAAACCTGGGGGCTCT----- mirL 18 15
-----CAAACCTGGGGGCTCTTTG----- mirL 19 10
-----CTCAAACCTGGGGGCTCTTTG----- mirL 21 10
-----CAAACCTGGGGGCTCTTT----- mirL 18 5
-----TCAAACCTGGGGGCTCTTT----- mirL 19 3
-----ACTCAAACCTGGGGGCTCTTTGGAT----- mirL 25 3
-----CTCAAACCTGGGGGCTCTTT----- mirL 20 2

```

```

-----TCAAAGTGGGGGCTCTTTTG----- mirL 20 1
-----TACTCAAAGTGGGGGCTCTTTTG----- mirL 23 1
-----ATACTCAAAGTGGGGGCT----- mirL 18 1
-----CAAAGTGGGGGCTCTTTTG----- mirL 20 1
-----TGGATTTTCATCGGAAGAA----- loop 19 1
-----TGGATTTTCATCGGAAGA----- loop 18 1
-----TTTTTCATCGGAAGAAAAG----- loop 18 1
-----GGATTTTCATCGGAAGAA----- loop 18 1
-----AAGTGCCGCCAGGTTTTGAGTGT----- mirR 23 609
-----AAAGTGCCGCCAGGTTTTGAGTGT----- mirR 24 364
-----GTGCCGCCAGGTTTTGAGTGT----- mirR 21 237
-----AGTGCCGCCAGGTTTTGAGTGT----- mirR 22 65
-----AAGTGCCGCCAGGTTTTGAGTGTC----- mirR 24 62
-----AAGTGCCGCCAGGTTTTGAGTG----- mirR 22 51
-----TGCCGCCAGGTTTTGAGTGT----- mirR 20 36
-----AAAGTGCCGCCAGGTTTTGAGTG----- mirR 23 29
-----GTGCCGCCAGGTTTTGAGTG----- mirR 20 19
-----AAAGTGCCGCCAGGTTTT----- mirR 18 18
-----AAAGTGCCGCCAGGTTTTGAGTGTC----- mirR 25 17
-----AAGTGCCGCCAGGTTTTGAG----- mirR 20 17
-----AAGTGCCGCCAGGTTTTGA----- mirR 19 16
-----AAAGTGCCGCCAGGTTTTGAGT----- mirR 22 15
-----AAAGTGCCGCCAGGTTTTG----- mirR 19 14
-----AAGTGCCGCCAGGTTTTG----- mirR 18 13
-----AAGTGCCGCCAGGTTTTGAGT----- mirR 21 13
-----GTGCCGCCAGGTTTTGAGT----- mirR 19 13
-----GTGCCGCCAGGTTTTGAGTGTC----- mirR 22 13
-----AAAGTGCCGCCAGGTTTTGA----- mirR 20 11
-----GTGCCGCCAGGTTTTGAG----- mirR 18 11
-----AAAAGTGCCGCCAGGTTTTGAGTGT----- mirR 25 4
-----AGTGCCGCCAGGTTTTGAGTGTC----- mirR 23 3
-----GTGCCGCCAGGTTTTGAGTGTC----- mirR 23 2
-----TGCCGCCAGGTTTTGAGT----- mirR 18 2
-----AGTGCCGCCAGGTTTTGAGTG----- mirR 21 2
-----GAAAAGTGCCGCCAGGTT----- mirR 18 2
-----GAAAAGTGCCGCCAGGTTT----- mirR 19 2
-----TGCCGCCAGGTTTTGAGTG----- mirR 19 2
-----AGTGCCGCCAGGTTTTGAG----- mirR 19 1
-----GTGCCGCCAGGTTTTGAGTGTCACC----- mirR 25 1
-----AAAAGTGCCGCCAGGTTTTGAGTGTC----- mirR 27 1
-----AGTGCCGCCAGGTTTTGA----- mirR 18 1
-----AAAAGTGCCGCCAGGTTTTGAGTG----- mirR 24 1
-----TGCCGCCAGGTTTTGAGTGTC----- mirR 21 1
-----TGTCACCGGTTGAGAAGTCA----- morR 19 1
-----CGGTTGAGAAGTCAAAAC----- morR 18 1
-----TCACCGGTTGAGAAGTCA----- morR 18 1

```



```
-----ACCGGTTGAGAACTCAAA-- morR 18 1
-----GTCACCGGTTGAGAACTC----- morR 18 1

>mmu-mir-2145-2
TCTCCTCTGATCTCGGAAGCTAAGCAGGGTCGGGCCTGGTTAGCACTTGGATGGGAGAAACGTTGAGGCGGGCTAGAGTGCAATTCCCAACACTGGCCCATTTGCTTAGTGTCTTGAGTTCCAAGCTCCTCACTT speci
--TCCTCTGATCTCGGAAGCTA----- morL
--TCCTCTGATCTCGGAAGCT----- morL
--TCCTCTGATCTCGGAAGC----- morL
--TCCTCTGATCTCGGAAGCTAAG----- morL
--TCCTCTGATCTCGGAAGCTAA----- morL
---CCTCTGATCTCGGAAGCTA----- morL
---CTCTGATCTCGGAAGCTA----- morL
-CTCCTCTGATCTCGGAAGC----- morL
-CTCCTCTGATCTCGGAAGCTA----- morL
TCTCCTCTGATCTCGGAAGCT----- morL
--TCCTCTGATCTCGGAAGCTAAGC----- morL
-CTCCTCTGATCTCGGAAGCTAA----- morL
TCTCCTCTGATCTCGGAAGCTA----- morL
---CCTCTGATCTCGGAAGCT----- morL
---CTCTGATCTCGGAAGCTAAGC----- morL
-CTCCTCTGATCTCGGAAGCT----- morL
---CTGATCTCGGAAGCTAAG----- morL
---CTCTGATCTCGGAAGCTAAG----- morL
---CTCTGATCTCGGAAGCTAA----- morL
-CTCCTCTGATCTCGGAAG----- morL
---CCTCTGATCTCGGAAGCTAAGC----- morL
---CCTCTGATCTCGGAAGCTAAG----- morL
-----AGCAGGGTCGGGCCTGGTT----- mirL
-----AGCAGGGTCGGGCCTGGTTA----- mirL
-----AGCAGGGTCGGGCCTGGT----- mirL
-----AAGCAGGGTCGGGCCTGG----- mirL
-----GCAGGGTCGGGCCTGGTT----- mirL
-----AAGCAGGGTCGGGCCTGGTT----- mirL
-----GCAGGGTCGGGCCTGGTTA----- mirL
-----AAGCAGGGTCGGGCCTGGT----- mirL
-----CAGGGTCGGGCCTGGTTA----- mirL
-----AGCAGGGTCGGGCCTGGTTAG----- mirL
-----TAAGCAGGGTCGGGCCTGGTTA----- mirL
-----AAGCAGGGTCGGGCCTGGTTA----- mirL
-----TAAGCAGGGTCGGGCCTGGTT----- mirL
-----TAAGCAGGGTCGGGCCTGG----- mirL
-----AGCAGGGTCGGGCCTGGTTAGCAC----- mirL
-----CTAAGCAGGGTCGGGCCTGGTT----- mirL
-----CTAAGCAGGGTCGGGCCTGGTTA----- mirL
-----AGCAGGGTCGGGCCTGGTTAGCA----- mirL
-----AGCAGGGTCGGGCCTGGTTAGC----- mirL
```

```

-----CTAAGCAGGGTCGGGCCT----- mirL
-----TAAGCAGGGTCGGGCCTGGT----- mirL
-----CTAAGCAGGGTCGGGCCTGGT----- mirL
-----GCAGGGTCGGGCCTGGTTAG----- mirL
-----GGCCCATGCTTAGTGTT----- mirR
-----GGCCCATGCTTAGTGTT----- mirR
-----CCCATTGCTTAGTGTTCTG----- mirR
-----CCCATTGCTTAGTGTTTC----- mirR
-----CTGAGTTCCAAGCTCCTC----- morR
-----TGAGTTCCAAGCTCCTCACT----- morR
-----TCTGAGTTCCAAGCTCCT----- morR
-----GAGTTCCAAGCTCCTCACT----- morR
-----GAGTTCCAAGCTCCTCACT----- morR
-----GAGTTCCAAGCTCCTCAC----- morR

```

>mmu-mir-466g

| Species | len | reads |
|---------|-----|-------|
| morL    | 19  | 1     |
| morL    | 20  | 1     |
| morL    | 18  | 1     |
| morL    | 18  | 1     |
| mirL    | 20  | 4     |
| mirL    | 18  | 1     |
| loop    | 19  | 1     |
| mirR    | 21  | 991   |
| mirR    | 18  | 382   |
| mirR    | 20  | 344   |
| mirR    | 19  | 170   |
| mirR    | 22  | 91    |
| mirR    | 24  | 75    |
| mirR    | 19  | 35    |
| mirR    | 18  | 28    |
| mirR    | 20  | 21    |
| mirR    | 18  | 11    |
| mirR    | 22  | 8     |
| mirR    | 19  | 6     |
| mirR    | 23  | 6     |
| mirR    | 19  | 5     |
| mirR    | 21  | 4     |
| mirR    | 18  | 4     |
| mirR    | 20  | 2     |
| mirR    | 23  | 2     |
| mirR    | 20  | 2     |
| mirR    | 19  | 2     |
| mirR    | 20  | 1     |
| mirR    | 21  | 1     |

```

-----CATATACAGACACATGCACAC----- mirR 21 1
-----ATATACAGACACATGCACA----- mirR 19 1
-----TATACAGACACATGCACA----- mirR 18 1
-----CGGCACACACACACACAC----- morR 18 7
-----CGGCACACACACACACAC----- morR 20 4
-----GGCACACACACACACACACA----- morR 20 3
-----ACATGCGGCACACACACACAC----- morR 21 2
-----GCGGCACACACACACACACAAAAT morR 25 2
-----GCGGCACACACACACACACAC----- morR 21 2
-----GGCACACACACACACACACA----- morR 18 2
-----CATGCGGCACACACACACAC----- morR 18 2
-----GCGGCACACACACACACAC----- morR 19 1
-----CATGCGGCACACACACACAC----- morR 20 1
-----ACATGCGGCACACACACACA----- morR 18 1
-----TGCGGCACACACACACAC----- morR 18 1
-----CGGCACACACACACACACA----- morR 19 1
-----ACATGCGGCACACACACAC----- morR 19 1
-----TGCGGCACACACACACAC----- morR 20 1
-----CGGCACACACACACACACA----- morR 21 1

```

>mmu-mir-710

```

CTCTCGTCAAATAGAAGCCAAGTCTTGGGGAGAGTTGAGCTTGGTGTGAAAACCTGACATACCCCTTCAACTCTTTAGAACTTAGGTATCTGAAGTGGAGTGGATGGAGTAGTTCTCTAAAAATAAAAGGTAGG species
CTCTCGTCAAATAGAAGC----- morL 18
-----CCAAGTCTTGGGGAGAGTTGAG----- mirL 22
-----CCAAGTCTTGGGGAGAGTTGA----- mirL 21
-----CCAAGTCTTGGGGAGAGTTG----- mirL 20
-----CCAAGTCTTGGGGAGAGTTGAGC----- mirL 23
-----AGTCTTGGGGAGAGTTGA----- mirL 18
-----AAGTCTTGGGGAGAGTTGA----- mirL 19
-----CCAAGTCTTGGGGAGAGTT----- mirL 19
-----AGTCTTGGGGAGAGTTGAG----- mirL 19
-----CCAAGTCTTGGGGAGAGT----- mirL 18
-----CAAGTCTTGGGGAGAGTTGA----- mirL 20
-----CCAAGTCTTGGGGAGAGTTGAGCT----- mirL 24
-----CAAGTCTTGGGGAGAGTTG----- mirL 19
-----AAGTCTTGGGGAGAGTTGAG----- mirL 20
-----CAAGTCTTGGGGAGAGTTGAG----- mirL 21
-----AAGTCTTGGGGAGAGTTG----- mirL 18
-----AGTCTTGGGGAGAGTTGAGC----- mirL 20
-----AAGCCAAGTCTTGGGGAG----- mirL 18
-----CAAGTCTTGGGGAGAGTT----- mirL 18
-----CAAGTCTTGGGGAGAGTTGAGCT----- mirL 23
-----AGCCAAGTCTTGGGGAGAGT----- mirL 20
-----AGCCAAGTCTTGGGGAGA----- mirL 18
-----CAAGTCTTGGGGAGAGTTGAGC----- mirL 22
-----TGGAGTGGATGGAGTAGT----- mirR 18

```

```

-----AGTGGAGTGGATGGAGTA----- mirR 18
-----AAGTGGAGTGGATGGAGT----- mirR 18
-----TTCCTAAAAATAAAAGGT--- morR 18
-----TTCCTAAAAATAAAAGGTA-- morR 19
-----CCTAAAAATAAAAGGTAG- morR 18
-----AGTTCCTAAAAATAAAAG---- morR 18
-----CTAAAAATAAAAGGTAGG morR 18

```

>mmu-mir-654

| CTCCTCGGTAAGTGGGAAGATGGTAAGCTGCAGAACATGTGTGTTTCTCATGTATGTCTGCTGACCATCACCTTT | species | len | reads |
|-----------------------------------------------------------------------------|---------|-----|-------|
| CTCCTCGGTAAGTGGGAAGATGGTAAGCTGCAGAACATGTGTGTTTCTCATGTATGTCTGCTGACCATCACCTTT | morL    | 18  | 2     |
| -----TGGAAGCTGCAGAACATGTGT-----                                             | mirL    | 22  | 705   |
| -----TGGAAGCTGCAGAACATGT-----                                               | mirL    | 20  | 336   |
| -----TGGAAGCTGCAGAACATGTG-----                                              | mirL    | 21  | 260   |
| -----TGGAAGCTGCAGAACATG-----                                                | mirL    | 19  | 103   |
| -----GGTAAGCTGCAGAACATGTGT-----                                             | mirL    | 21  | 66    |
| -----TGGAAGCTGCAGAACAT-----                                                 | mirL    | 18  | 57    |
| -----TGGAAGCTGCAGAACATGTGTG-----                                            | mirL    | 23  | 32    |
| -----GGTAAGCTGCAGAACATGT-----                                               | mirL    | 19  | 25    |
| -----GGTAAGCTGCAGAACATGTG-----                                              | mirL    | 20  | 25    |
| -----GTAAGCTGCAGAACATGT-----                                                | mirL    | 18  | 20    |
| -----GTAAGCTGCAGAACATGTGT-----                                              | mirL    | 20  | 14    |
| -----GGTAAGCTGCAGAACATG-----                                                | mirL    | 18  | 13    |
| -----TAAGCTGCAGAACATGTGT-----                                               | mirL    | 19  | 11    |
| -----GTAAGCTGCAGAACATGTG-----                                               | mirL    | 19  | 9     |
| -----TAAGCTGCAGAACATGTG-----                                                | mirL    | 18  | 7     |
| -----TGGAAGCTGCAGAACATGTGTGT-----                                           | mirL    | 24  | 6     |
| -----GGTAAGCTGCAGAACATGTGTG-----                                            | mirL    | 22  | 5     |
| -----ATGGTAAGCTGCAGAACATGTGT-----                                           | mirL    | 23  | 2     |
| -----TAAGCTGCAGAACATGTGTGT-----                                             | mirL    | 21  | 1     |
| -----TAAGCTGCAGAACATGTGTG-----                                              | mirL    | 20  | 1     |
| -----TATGTCTGCTGACCATCACCTT-----                                            | mirR    | 22  | 193   |
| -----TATGTCTGCTGACCATCACCT--                                                | mirR    | 21  | 85    |
| -----TATGTCTGCTGACCATCACCC--                                                | mirR    | 20  | 53    |
| -----ATGTCTGCTGACCATCACCTT-----                                             | mirR    | 21  | 40    |
| -----GTCTGCTGACCATCACCTT-----                                               | mirR    | 19  | 28    |
| -----TATGTCTGCTGACCATCA-----                                                | mirR    | 18  | 28    |
| -----TATGTCTGCTGACCATCAC-----                                               | mirR    | 19  | 27    |
| -----ATGTCTGCTGACCATCACCT--                                                 | mirR    | 20  | 26    |
| -----TGTCTGCTGACCATCACCTT-----                                              | mirR    | 20  | 16    |
| -----ATGTCTGCTGACCATCACCC--                                                 | mirR    | 19  | 10    |
| -----TATGTCTGCTGACCATCACCTTT-----                                           | mirR    | 23  | 4     |
| -----TGTCTGCTGACCATCACCT--                                                  | mirR    | 19  | 4     |
| -----GTCTGCTGACCATCACCT--                                                   | mirR    | 18  | 4     |
| -----ATGTCTGCTGACCATCAC-----                                                | mirR    | 18  | 2     |
| -----ATGTCTGCTGACCATCACCTTT-----                                            | mirR    | 22  | 2     |

```
-----TGTCTGCTGACCATCACC--- mirR 18 2
-----TGTCTGCTGACCATCACCTTT mirR 21 1
-----ATATGTCTGCTGACCATCA----- mirR 19 1
-----CATATGTCTGCTGACCATC----- mirR 19 1
-----ATATGTCTGCTGACCATC----- mirR 18 1

>mmu-mir-675
GAGGCACTGCGGCCAGGGACTGGTGCAGAAAGGGCCACAGTGGACTTGGTACACTGTATGCCCTAACCGCTCAGTCC species len reads
-----CTGCGGCCAGGGACTGG----- morL 18 2
GAGGCACTGCGGCCAGG----- morL 18 1
--GGCACTGCGGCCAGGGA----- morL 18 1
-----TGGTGCAGAAAGGGCCACAGT----- mirL 22 253
-----TGGTGCAGAAAGGGCCACAGTG----- mirL 23 137
-----TGGTGCAGAAAGGGCCACACA----- mirL 20 63
-----TGGTGCAGAAAGGGCCACAG----- mirL 21 59
-----TGGTGCAGAAAGGGCCAC----- mirL 19 27
-----TGGTGCAGAAAGGGCCACA----- mirL 18 17
-----GGTGCAGAAAGGGCCACACA----- mirL 19 13
-----GGTGCAGAAAGGGCCACAGT----- mirL 21 11
-----GGTGCAGAAAGGGCCACAG----- mirL 20 10
-----GTGCGAAAGGGCCACAGT----- mirL 20 8
-----GTGCGAAAGGGCCACAGTG----- mirL 21 7
-----GGTGCAGAAAGGGCCACAGTG----- mirL 22 6
-----TGCGAAAGGGCCACAGTG----- mirL 20 4
-----GGTGCAGAAAGGGCCAC----- mirL 18 4
-----TGCGAAAGGGCCACAGT----- mirL 19 4
-----GTGCGAAAGGGCCACACA----- mirL 18 4
-----TGGTGCAGAAAGGGCCACAGTGG----- mirL 24 3
-----TGCGAAAGGGCCACAG----- mirL 18 3
-----GTGCGAAAGGGCCACAG----- mirL 19 2
-----GGTGCAGAAAGGGCCACAGTG----- mirL 23 1
-----CTGTATGCCCTAACCGCTCAG--- mirR 21 454
-----CTGTATGCCCTAACCGCTCA--- mirR 20 443
-----CTGTATGCCCTAACCGCTCAGT-- mirR 22 278
-----CTGTATGCCCTAACCGCTCAGTC- mirR 23 95
-----CTGTATGCCCTAACCGCT----- mirR 18 75
-----CTGTATGCCCTAACCGCTC----- mirR 19 66
-----CTGTATGCCCTAACCGCTCAGTCC mirR 24 21
-----TGTATGCCCTAACCGCTCAGTC- mirR 22 18
-----TATGCCCTAACCGCTCAG--- mirR 18 14
-----GTATGCCCTAACCGCTCA--- mirR 18 12
-----TGTATGCCCTAACCGCTCAGT-- mirR 21 12
-----GTATGCCCTAACCGCTCAG--- mirR 19 12
-----TGTATGCCCTAACCGCTCAG--- mirR 20 11
-----GTATGCCCTAACCGCTCAGTC- mirR 21 10
-----GTATGCCCTAACCGCTCAGT-- mirR 20 9
```

```

-----TGTATGCCCTAACCGCTCA---- mirR 19 7
-----TATGCCCTAACCGCTCAGT-- mirR 19 6
-----TATGCCCTAACCGCTCAGTCC mirR 21 1
-----TGTATGCCCTAACCGCTC---- mirR 18 1
-----ACACTGTATGCCCTAACCC----- mirR 18 1
-----TATGCCCTAACCGCTCAGTC- mirR 20 1
-----ACTGTATGCCCTAACCGCTCAGT-- mirR 23 1

```

>mmu-mir-1897

| Species | len | reads |
|---------|-----|-------|
| morL    | 18  | 1     |
| mirL    | 23  | 59    |
| mirL    | 22  | 17    |
| mirL    | 21  | 6     |
| mirL    | 20  | 5     |
| mirL    | 18  | 3     |
| mirL    | 21  | 2     |
| mirL    | 19  | 2     |
| mirL    | 20  | 1     |
| mirL    | 19  | 1     |
| mirL    | 21  | 1     |
| mirL    | 19  | 1     |
| mirL    | 22  | 1     |
| mirL    | 18  | 1     |
| mirL    | 26  | 1     |
| loop    | 18  | 1     |
| mirR    | 22  | 1120  |
| mirR    | 21  | 299   |
| mirR    | 23  | 191   |
| mirR    | 20  | 109   |
| mirR    | 21  | 84    |
| mirR    | 19  | 60    |
| mirR    | 18  | 39    |
| mirR    | 20  | 31    |
| mirR    | 22  | 17    |
| mirR    | 20  | 16    |
| mirR    | 19  | 13    |
| mirR    | 18  | 12    |
| mirR    | 24  | 12    |
| mirR    | 19  | 9     |
| mirR    | 18  | 7     |
| mirR    | 19  | 7     |
| mirR    | 21  | 5     |
| mirR    | 18  | 4     |
| mirR    | 23  | 3     |
| mirR    | 23  | 2     |

```
-----CAACTCGTTCTGTCCGGTGAGGAGTG----- mirR 26 1
-----ACTCGTTCTGTCCGGTGAGGAGTGA----- mirR 25 1
-----TTCAACTCGTTCTGTCCG----- mirR 18 1
-----AGTGATCCAGCTTGGGCTG morR 19 1
-----GAGGAGTGATCCAGCTTG----- morR 18 1
```

>mmu-mir-881

| Sequence                                                                                    | species | len | reads |
|---------------------------------------------------------------------------------------------|---------|-----|-------|
| AATTGTGTGCAGTACAATATTCAGAGAGATAACAGTCACATCTTTTCTAAAGTAACTGTGTCTTTTCTGAATAGAGTAATGTTACCAAAAA | morL    | 20  | 1     |
| AATTGTGTGCAGTACAATATTCAGAGAGATAACAGTCACATCTTTTCTAAAGTAACTGTGTCTTTTCTGAATAGAGTAATGTTACCAAAAA | morL    | 18  | 1     |
| AATTGTGTGCAGTACAATATTCAGAGAGATAACAGTCACATCTTTTCTAAAGTAACTGTGTCTTTTCTGAATAGAGTAATGTTACCAAAAA | mirL    | 19  | 220   |
| AATTGTGTGCAGTACAATATTCAGAGAGATAACAGTCACATCTTTTCTAAAGTAACTGTGTCTTTTCTGAATAGAGTAATGTTACCAAAAA | mirL    | 22  | 212   |
| AATTGTGTGCAGTACAATATTCAGAGAGATAACAGTCACATCTTTTCTAAAGTAACTGTGTCTTTTCTGAATAGAGTAATGTTACCAAAAA | mirL    | 21  | 181   |
| AATTGTGTGCAGTACAATATTCAGAGAGATAACAGTCACATCTTTTCTAAAGTAACTGTGTCTTTTCTGAATAGAGTAATGTTACCAAAAA | mirL    | 20  | 149   |
| AATTGTGTGCAGTACAATATTCAGAGAGATAACAGTCACATCTTTTCTAAAGTAACTGTGTCTTTTCTGAATAGAGTAATGTTACCAAAAA | mirL    | 19  | 72    |
| AATTGTGTGCAGTACAATATTCAGAGAGATAACAGTCACATCTTTTCTAAAGTAACTGTGTCTTTTCTGAATAGAGTAATGTTACCAAAAA | mirL    | 18  | 43    |
| AATTGTGTGCAGTACAATATTCAGAGAGATAACAGTCACATCTTTTCTAAAGTAACTGTGTCTTTTCTGAATAGAGTAATGTTACCAAAAA | mirL    | 18  | 34    |
| AATTGTGTGCAGTACAATATTCAGAGAGATAACAGTCACATCTTTTCTAAAGTAACTGTGTCTTTTCTGAATAGAGTAATGTTACCAAAAA | mirL    | 20  | 26    |
| AATTGTGTGCAGTACAATATTCAGAGAGATAACAGTCACATCTTTTCTAAAGTAACTGTGTCTTTTCTGAATAGAGTAATGTTACCAAAAA | mirL    | 23  | 21    |
| AATTGTGTGCAGTACAATATTCAGAGAGATAACAGTCACATCTTTTCTAAAGTAACTGTGTCTTTTCTGAATAGAGTAATGTTACCAAAAA | mirL    | 19  | 18    |
| AATTGTGTGCAGTACAATATTCAGAGAGATAACAGTCACATCTTTTCTAAAGTAACTGTGTCTTTTCTGAATAGAGTAATGTTACCAAAAA | mirL    | 21  | 14    |
| AATTGTGTGCAGTACAATATTCAGAGAGATAACAGTCACATCTTTTCTAAAGTAACTGTGTCTTTTCTGAATAGAGTAATGTTACCAAAAA | mirL    | 18  | 7     |
| AATTGTGTGCAGTACAATATTCAGAGAGATAACAGTCACATCTTTTCTAAAGTAACTGTGTCTTTTCTGAATAGAGTAATGTTACCAAAAA | mirL    | 18  | 7     |
| AATTGTGTGCAGTACAATATTCAGAGAGATAACAGTCACATCTTTTCTAAAGTAACTGTGTCTTTTCTGAATAGAGTAATGTTACCAAAAA | mirL    | 19  | 5     |
| AATTGTGTGCAGTACAATATTCAGAGAGATAACAGTCACATCTTTTCTAAAGTAACTGTGTCTTTTCTGAATAGAGTAATGTTACCAAAAA | mirL    | 20  | 5     |
| AATTGTGTGCAGTACAATATTCAGAGAGATAACAGTCACATCTTTTCTAAAGTAACTGTGTCTTTTCTGAATAGAGTAATGTTACCAAAAA | mirL    | 21  | 4     |
| AATTGTGTGCAGTACAATATTCAGAGAGATAACAGTCACATCTTTTCTAAAGTAACTGTGTCTTTTCTGAATAGAGTAATGTTACCAAAAA | mirL    | 20  | 3     |
| AATTGTGTGCAGTACAATATTCAGAGAGATAACAGTCACATCTTTTCTAAAGTAACTGTGTCTTTTCTGAATAGAGTAATGTTACCAAAAA | mirL    | 22  | 2     |
| AATTGTGTGCAGTACAATATTCAGAGAGATAACAGTCACATCTTTTCTAAAGTAACTGTGTCTTTTCTGAATAGAGTAATGTTACCAAAAA | mirL    | 23  | 1     |
| AATTGTGTGCAGTACAATATTCAGAGAGATAACAGTCACATCTTTTCTAAAGTAACTGTGTCTTTTCTGAATAGAGTAATGTTACCAAAAA | mirL    | 18  | 1     |
| AATTGTGTGCAGTACAATATTCAGAGAGATAACAGTCACATCTTTTCTAAAGTAACTGTGTCTTTTCTGAATAGAGTAATGTTACCAAAAA | mirL    | 24  | 1     |
| AATTGTGTGCAGTACAATATTCAGAGAGATAACAGTCACATCTTTTCTAAAGTAACTGTGTCTTTTCTGAATAGAGTAATGTTACCAAAAA | loop    | 18  | 1     |
| AATTGTGTGCAGTACAATATTCAGAGAGATAACAGTCACATCTTTTCTAAAGTAACTGTGTCTTTTCTGAATAGAGTAATGTTACCAAAAA | mirR    | 19  | 425   |
| AATTGTGTGCAGTACAATATTCAGAGAGATAACAGTCACATCTTTTCTAAAGTAACTGTGTCTTTTCTGAATAGAGTAATGTTACCAAAAA | mirR    | 20  | 235   |
| AATTGTGTGCAGTACAATATTCAGAGAGATAACAGTCACATCTTTTCTAAAGTAACTGTGTCTTTTCTGAATAGAGTAATGTTACCAAAAA | mirR    | 21  | 227   |
| AATTGTGTGCAGTACAATATTCAGAGAGATAACAGTCACATCTTTTCTAAAGTAACTGTGTCTTTTCTGAATAGAGTAATGTTACCAAAAA | mirR    | 18  | 86    |
| AATTGTGTGCAGTACAATATTCAGAGAGATAACAGTCACATCTTTTCTAAAGTAACTGTGTCTTTTCTGAATAGAGTAATGTTACCAAAAA | mirR    | 18  | 30    |
| AATTGTGTGCAGTACAATATTCAGAGAGATAACAGTCACATCTTTTCTAAAGTAACTGTGTCTTTTCTGAATAGAGTAATGTTACCAAAAA | mirR    | 19  | 20    |
| AATTGTGTGCAGTACAATATTCAGAGAGATAACAGTCACATCTTTTCTAAAGTAACTGTGTCTTTTCTGAATAGAGTAATGTTACCAAAAA | mirR    | 19  | 13    |
| AATTGTGTGCAGTACAATATTCAGAGAGATAACAGTCACATCTTTTCTAAAGTAACTGTGTCTTTTCTGAATAGAGTAATGTTACCAAAAA | mirR    | 18  | 13    |
| AATTGTGTGCAGTACAATATTCAGAGAGATAACAGTCACATCTTTTCTAAAGTAACTGTGTCTTTTCTGAATAGAGTAATGTTACCAAAAA | mirR    | 18  | 10    |
| AATTGTGTGCAGTACAATATTCAGAGAGATAACAGTCACATCTTTTCTAAAGTAACTGTGTCTTTTCTGAATAGAGTAATGTTACCAAAAA | mirR    | 22  | 4     |
| AATTGTGTGCAGTACAATATTCAGAGAGATAACAGTCACATCTTTTCTAAAGTAACTGTGTCTTTTCTGAATAGAGTAATGTTACCAAAAA | mirR    | 23  | 1     |
| AATTGTGTGCAGTACAATATTCAGAGAGATAACAGTCACATCTTTTCTAAAGTAACTGTGTCTTTTCTGAATAGAGTAATGTTACCAAAAA | mirR    | 31  | 1     |
| AATTGTGTGCAGTACAATATTCAGAGAGATAACAGTCACATCTTTTCTAAAGTAACTGTGTCTTTTCTGAATAGAGTAATGTTACCAAAAA | mirR    | 20  | 1     |
| AATTGTGTGCAGTACAATATTCAGAGAGATAACAGTCACATCTTTTCTAAAGTAACTGTGTCTTTTCTGAATAGAGTAATGTTACCAAAAA | morR    | 19  | 1     |

```

-----AGTAATGTTACCAAAAA morR 18 1

>mmu-mir-1982
AGGACAGAGGTTGGTATTGCTTGGGAGGGTCCTGGGGAGGGGAGTTCTGGCACCCCAACCTCTCACCTATGTTCTCCACAGCCGCC species len reads
AGGACAGAGGTTGGTATT-----morL 18 1
-----TTGGGAGGGTCCTGGGGAG-----mirL 19 11
-----TTGGGAGGGTCCTGGGGAGG-----mirL 20 5
-----TTGGGAGGGTCCTGGGGAGGG-----mirL 21 5
-----TTGGGAGGGTCCTGGGGAGGGG-----mirL 22 4
-----TGGGAGGGTCCTGGGGAGGG-----mirL 20 2
-----GGAGGGTCCTGGGGAGGGG-----mirL 19 2
-----TTGGGAGGGTCCTGGGGAGGGGAG-----mirL 24 2
-----TGGGAGGGTCCTGGGGAG-----mirL 18 1
-----GGGAGGGTCCTGGGGAGGGGAG-----mirL 22 1
-----TTGGGAGGGTCCTGGGGAGGGGAGT-----mirL 25 1
-----TGGGAGGGTCCTGGGGAGGGGAGT-----mirL 24 1
-----GGAGGGTCCTGGGGAGGG-----mirL 18 1
-----GGAGGGTCCTGGGGAGGGGA-----mirL 20 1
-----GGAGTTCTGGCACCCCAA-----loop 18 1
-----GAGTTCTGGCACCCCAAC-----loop 18 1
-----GGGAGTTCTGGCACCCCA-----loop 18 1
-----TCTCACCTATGTTCTCCACAG-----mirR 23 387
-----TCACCCTATGTTCTCCACAG-----mirR 21 278
-----TCTCACCTATGTTCTCCACA-----mirR 22 242
-----TCACCCTATGTTCTCCACA-----mirR 20 225
-----TCTCACCTATGTTCTCCAC-----mirR 21 176
-----TCACCCTATGTTCTCCACAGC-----mirR 22 121
-----TCTCACCTATGTTCTCCCA-----mirR 20 101
-----TCTCACCTATGTTCTCCACAGC-----mirR 24 93
-----TCACCCTATGTTCTCCCA-----mirR 18 76
-----TCACCCTATGTTCTCCAC-----mirR 19 66
-----TCTCACCTATGTTCTCCACAGCC-----mirR 25 58
-----TCACCCTATGTTCTCCACAGCC-----mirR 23 41
-----CTCACCTATGTTCTCCACAG-----mirR 22 31
-----TCTCACCTATGTTCTCC-----mirR 18 30
-----CACCTATGTTCTCCACA-----mirR 19 28
-----CTCACCTATGTTCTCCACA-----mirR 21 16
-----CACCTATGTTCTCCACAG-----mirR 20 16
-----CTCACCTATGTTCTCCACAGC-----mirR 23 13
-----CTCACCTATGTTCTCCCA-----mirR 19 9
-----CTCACCTATGTTCTCCAC-----mirR 20 8
-----CACCTATGTTCTCCACAGC-----mirR 21 8
-----CACCTATGTTCTCCAC-----mirR 18 7
-----CTCACCTATGTTCTCCACAGCC-----mirR 24 5
-----CTCACCTATGTTCTCC-----mirR 18 4
-----TCACCCTATGTTCTCCACAGCCGCC-----mirR 27 3

```



```
-----CCTCTCACCCATGTTCT----- mirR 18 1
-----CCTCTCACCCATGTTCTCC----- mirR 20 1
-----CTCTCACCCATGTTCTCC----- mirR 19 1
```

>mmu-mir-698

```
CCTCACTGTAAGGGAGGGTGGTGGCTATGTGGGTGGGACAGGGATGTTGTTGCTAAAGACATTTCGTTTCCTTCCCTCAGTGTCAGATGGTGAAC species len reads
--TCACTGTAAGGGAGGGTGG-- morL 19 3
-CTCACTGTAAGGGAGGGT-- morL 18 2
-CTCACTGTAAGGGAGGGTG-- morL 19 1
CCTCACTGTAAGGGAGGGT-- morL 19 1
-----GGCTATGTGGGTGGGACA----- mirL 18 4
-----TGGCTATGTGGGTGGGACA----- mirL 19 1
-----TGGCTATGTGGGTGGGACAG----- mirL 20 1
-----GGTGGCTATGTGGGTGGGACA----- mirL 21 1
-----CATTCTCGTTTCCTTCCCT----- mirR 19 1422
-----CATTCTCGTTTCCTTCCC----- mirR 18 310
-----CATTCTCGTTTCCTTCCCTC----- mirR 20 242
-----CATTCTCGTTTCCTTCCCTCA----- mirR 21 44
-----ATTCTCGTTTCCTTCCCT----- mirR 18 22
-----CATTCTCGTTTCCTTCCCTCAG----- mirR 22 7
-----CATTCTCGTTTCCTTCCCTCAGT----- mirR 23 6
-----CATTCTCGTTTCCTTCCCTCAGTGC----- mirR 26 4
-----ATTCTCGTTTCCTTCCCTC----- mirR 19 2
-----ACATTCTCGTTTCCTTCCCT----- mirR 20 2
-----TTCTCGTTTCCTTCCCTCA----- mirR 19 2
-----ATTCTCGTTTCCTTCCCTCAGTG----- mirR 23 1
-----AGACATTCTCGTTTCCTTCCCTC----- mirR 23 1
-----TTCTCGTTTCCTTCCCTC----- mirR 18 1
-----TCTCGTTTCCTTCCCTCA----- mirR 18 1
-----TGTCCCAGATGGTGAAC morR 18 3
-----CTCAGTGTCAGATGGTGA-- morR 21 1
-----CCTCAGTGTCAGATG-- morR 18 1
```

>mmu-mir-1937b-1

```
AACTGGGGTAGGCCACAAATCCCGGACGAGCCCCACATGTAAGACCCCATGCTGGGCCCTCTGCTTAAGTCCCGGGATGAGCTGGCCAAACCCCAACATCTTGAGAGAAAACCA species len reads
AACTGGGGTAGGCCACAA----- morL 18 1
-----ATCCCGGACGAGCCCCAC----- mirL 19 1206
-----TCCCGGACGAGCCCCACA----- mirL 19 229
-----TCCCGGACGAGCCCCAC----- mirL 18 229
-----ATCCCGGACGAGCCCCACA----- mirL 20 115
-----AATCCCGGACGAGCCCCAC----- mirL 20 85
-----ATCCCGGACGAGCCCCACAT----- mirL 21 50
-----ATCCCGGACGAGCCCCACATG----- mirL 22 22
-----AATCCCGGACGAGCCCCACA----- mirL 21 21
-----CAAATCCCGGACGAGCCCCAC----- mirL 22 14
-----TCCCGGACGAGCCCCACAT----- mirL 20 9
```

```

-----CCCGGACGAGCCCCACA----- mirL 18 8
-----AAATCCCGGACGAGCCCCAC----- mirL 21 7
-----TCCCGGACGAGCCCCACATG----- mirL 21 5
-----AATCCCGGACGAGCCCCACAT----- mirL 22 4
-----AATCCCGGACGAGCCCCACATG----- mirL 23 4
-----ATCCCGGACGAGCCCCACATGT----- mirL 23 3
-----CAAATCCCGGACGAGCCCC----- mirL 19 2
-----CCCGGACGAGCCCCACAT----- mirL 19 2
-----CCGGACGAGCCCCACAT----- mirL 18 2
-----AATCCCGGACGAGCCCCACATGT----- mirL 24 1
-----TCCCGGACGAGCCCCACATGT----- mirL 22 1
-----CAAATCCCGGACGAGCCCCACA----- mirL 23 1
-----CCCGGACGAGCCCCACATGTA----- mirL 22 1
-----AAATCCCGGACGAGCCCCACA----- mirL 22 1
-----AGCTGGCCAACACCCCAA----- mirR 18 14
-----AGCTGGCCAACACCCCAAC----- mirR 19 11
-----TGAGCTGGCCAACACCCC----- mirR 18 4
-----TGAGCTGGCCAACACCCCAA----- mirR 20 2
-----AGCTGGCCAACACCCCAACA----- mirR 20 1
-----AGCTGGCCAACACCCCAACATCT----- mirR 23 1
-----GCTGGCCAACACCCCAACA----- mirR 19 1
-----AGCTGGCCAACACCCCAACAT----- mirR 21 1
-----ACATCTTGAGAGAAAACCA morR 19 2
-----CAACATCTTGAGAGAAAA--- morR 18 2
-----CAACATCTTGAGAGAAAAC-- morR 19 1

```

>mmu-mir-206

```

CGGAGGACACAGCTTCCCCAGGCCACATGCTTCTTTATATCCTCATAGATATCTCAGCACTATGGAATGTAAGGAAGTGTGTGTTTTGGCAAGTGCTTCTTCAAGG species len reads
-----ACACAGCTTCCCCAGGCC----- morL 18 2
--GAGGACACAGCTTCCCCA----- morL 18 1
--GGAGGACACAGCTTCCCCAG----- morL 20 1
CGGAGGACACAGCTTCCC----- morL 18 1
----GACACAGCTTCCCCAGGC----- morL 18 1
-----GCCACATGCTTCTTTATA----- mirL 18 2
-----ACATGCTTCTTTATATCCTCAT----- mirL 22 1
-----TCATAGATATCTCAGCAC----- loop 18 1
-----TGGAATGTAAGGAAGTGTGTGG----- mirR 22 699
-----TGGAATGTAAGGAAGTGTGT----- mirR 20 453
-----TGGAATGTAAGGAAGTGTGTG----- mirR 21 200
-----TGGAATGTAAGGAAGTGT----- mirR 18 192
-----TGGAATGTAAGGAAGTGTG----- mirR 19 142
-----TGGAATGTAAGGAAGTGTGTGTT----- mirR 23 75
-----GGAATGTAAGGAAGTGTGTGG----- mirR 21 67
-----AATGTAAGGAAGTGTGTGG----- mirR 19 43
-----GGAATGTAAGGAAGTGTGT----- mirR 19 41
-----GAATGTAAGGAAGTGTGTGG----- mirR 20 33

```

```

-----GGAATGTAAGGAAGTGTG----- mirR 18 25
-----GAATGTAAGGAAGTGTGT----- mirR 18 23
-----TGGAAATGTAAGGAAGTGTGTGGTT----- mirR 24 21
-----GGAATGTAAGGAAGTGTGTG----- mirR 20 11
-----GAATGTAAGGAAGTGTGTG----- mirR 19 5
-----GGAATGTAAGGAAGTGTGTGGT----- mirR 22 4
-----GGAATGTAAGGAAGTGTGTGGTTT----- mirR 24 2
-----ATGGAATGTAAGGAAGTGTGTGG----- mirR 23 2
-----ATGGAATGTAAGGAAGTGT----- mirR 19 1
-----ATGGAATGTAAGGAAGTGTGT----- mirR 21 1
-----ATGGAATGTAAGGAAGTGTGTGGT----- mirR 24 1
-----TTTGGCAAGTGCTTCTTC---- morR 18 1
-----TGGCAAGTGCTTCTTCAAG morR 20 1

>mmu-mir-2145-1
AATGGAATCATGTCTATAGTCATACCACCCTGAACATGCTTGATCCCATCTGATCTCAGAAGCCGAGCAGGGTCGGGCCTGGTTAATGCATAGACGTGGAATC species len reads
-ATGGAATCATGTCTATAG----- morL 18 1
-----ATCATGTCTATAGTCATA----- morL 18 1
AATGGAATCATGTCTATA----- morL 18 1
-----ATACCACCCTGAACATGC----- mirL 18 7
-----ATACCACCCTGAACATGCT----- mirL 19 7
-----GTCATACCACCCTGAACA----- mirL 18 4
-----ACCACCCTGAACATGCTT----- mirL 18 3
-----TACCACCCTGAACATGCT----- mirL 18 3
-----CCACCCTGAACATGCTTGA----- mirL 19 2
-----TCATACCACCCTGAACAT----- mirL 18 2
-----GTCATACCACCCTGAACAT----- mirL 19 1
-----TACCACCCTGAACATGCTT----- mirL 19 1
-----CCACCCTGAACATGCTTG----- mirL 18 1
-----CATACCACCCTGAACATGCT----- mirL 20 1
-----TACCACCCTGAACATGCTTG----- mirL 20 1
-----ACCACCCTGAACATGCTTGA----- mirL 20 1
-----CCACCCTGAACATGCTTGAT----- mirL 20 1
-----CATACCACCCTGAACATG----- mirL 18 1
-----TGATCCCATCTGATCTCAGAAG----- loop 22 1
-----AGCAGGGTCGGGCCTGGTT----- mirR 19 1664
-----AGCAGGGTCGGGCCTGGTTA----- mirR 20 148
-----AGCAGGGTCGGGCCTGGT----- mirR 18 140
-----GCAGGGTCGGGCCTGGTT----- mirR 18 22
-----GCAGGGTCGGGCCTGGTTA----- mirR 19 9
-----GAGCAGGGTCGGGCCTGGTT----- mirR 20 8
-----AGCAGGGTCGGGCCTGGTTAA----- mirR 21 6
-----CAGGGTCGGGCCTGGTTA----- mirR 18 4
-----AGCAGGGTCGGGCCTGGTTAATG----- mirR 23 2
-----GAGCAGGGTCGGGCCTGGT----- mirR 19 2
-----AGCAGGGTCGGGCCTGGTTAATGC----- mirR 24 1

```

```

-----GAGCAGGGTCGGGCCTGGTTA----- mirR 21 1
-----ATGCATAGACGTGGAATC morR 18 1

>mmu-mir-32
CTCTGCTTGCTCTGGTGGAGATATTGCACATTACTAAGTTGCATGTTGTCACGGCCTCAATGCAATTTAGTGTGTGTGATATTTTACATGAGTGCATGCACACGGG species len reads
-TCTGCTTGCTCTGGTGGAG----- morL 18 1
CTCTGCTTGCTCTGGTGGAG----- morL 20 1
CTCTGCTTGCTCTGGTGGAG----- morL 19 1
CTCTGCTTGCTCTGGTGG----- morL 18 1
-----TATTGCACATTACTAAGTTGC----- mirL 21 209
-----TATTGCACATTACTAAGTTGCA----- mirL 22 156
-----TATTGCACATTACTAAGTTG----- mirL 20 141
-----TATTGCACATTACTAAGTT----- mirL 19 120
-----ATTGCACATTACTAAGTTG----- mirL 19 59
-----ATTGCACATTACTAAGTTGC----- mirL 20 39
-----TATTGCACATTACTAAGTTGCAT----- mirL 23 29
-----ATTGCACATTACTAAGTTGCA----- mirL 21 28
-----TGCACATTACTAAGTTGC----- mirL 18 26
-----ATTGCACATTACTAAGTT----- mirL 18 25
-----TTGCACATTACTAAGTTG----- mirL 18 24
-----TATTGCACATTACTAAGT----- mirL 18 23
-----TGCACATTACTAAGTTGCA----- mirL 19 18
-----TTGCACATTACTAAGTTGC----- mirL 19 15
-----TATTGCACATTACTAAGTTGCATG----- mirL 24 9
-----TTGCACATTACTAAGTTGCA----- mirL 20 5
-----ATTGCACATTACTAAGTTGCAT----- mirL 22 4
-----ATTGCACATTACTAAGTTGCATG----- mirL 23 2
-----ATATTGCACATTACTAAGTTGC----- mirL 22 2
-----ATATTGCACATTACTAAGTTG----- mirL 21 2
-----AGATATTGCACATTACTA----- mirL 18 1
-----TTGCACATTACTAAGTTGCATG----- mirL 22 1
-----ATATTGCACATTACTAAGTT----- mirL 20 1
-----ATATTGCACATTACTAAGT----- mirL 19 1
-----ATGTTGTCACGGCCTCAA----- loop 18 1
-----CAATTTAGTGTGTGTGATATTT----- mirR 22 547
-----CAATTTAGTGTGTGTGATAT----- mirR 20 152
-----CAATTTAGTGTGTGTGATATT----- mirR 21 124
-----CAATTTAGTGTGTGTGATATTT----- mirR 23 105
-----CAATTTAGTGTGTGTGATA----- mirR 19 30
-----CAATTTAGTGTGTGTGAT----- mirR 18 19
-----TGCAATTTAGTGTGTGTGATAT----- mirR 22 17
-----GCAATTTAGTGTGTGTGATATT----- mirR 22 11
-----TGCAATTTAGTGTGTGTGATA----- mirR 21 9
-----AATTTAGTGTGTGTGATATTT----- mirR 21 8
-----GCAATTTAGTGTGTGTGATATT----- mirR 23 8
-----ATTTAGTGTGTGTGATATT----- mirR 19 7

```

```

-----TGCAATTTAGTGTGTGTGATATT----- mirR 23 6
-----ATGCAATTTAGTGTGTGTGAT----- mirR 21 6
-----TTTAGTGTGTGTGATATT----- mirR 18 5
-----ATTTAGTGTGTGTGATATT----- mirR 20 5
-----ATGCAATTTAGTGTGTGTGAT----- mirR 23 5
-----CAATTTAGTGTGTGTGATATTTTC----- mirR 24 5
-----TGCAATTTAGTGTGTGTGAT----- mirR 20 3
-----ATGCAATTTAGTGTGTGTG----- mirR 19 3
-----TTTAGTGTGTGTGATATTTT----- mirR 20 3
-----GCAATTTAGTGTGTGTGATATTT----- mirR 24 2
-----ATTTAGTGTGTGTGAT----- mirR 18 2
-----GCAATTTAGTGTGTGTGATA----- mirR 20 2
-----TGCAATTTAGTGTGTGTGA----- mirR 19 1
-----GCAATTTAGTGTGTGTGA----- mirR 18 1
-----ATGCAATTTAGTGTGTGTGATA----- mirR 22 1
-----TTTAGTGTGTGTGATATT----- mirR 19 1
-----GCAATTTAGTGTGTGTGAT----- mirR 21 1
-----ATGCAATTTAGTGTGTGTGA----- mirR 20 1
-----AATTTAGTGTGTGTGATA----- mirR 18 1
-----AATTTAGTGTGTGTGAT----- mirR 19 1
-----AATTTAGTGTGTGTGATATTT----- mirR 22 1
-----TGCAATTTAGTGTGTGTGATATT----- mirR 24 1
-----TTCACATGAGTGCATGCA----- morR 18 1
-----TTCACATGAGTGCATGCACA----- morR 20 1
-----CATGAGTGCATGCACACGGG morR 20 1

```

>mmu-mir-876

```

AAACTGTCACGTGCTATGGATTCTCTGTGAATCACTATATCAAATCTAGTGTGGTAGTGGTTTACAAAGTAATTCATAGTGCTTCACAGGTGCTCCT species len reads
AAACTGTCACGTGCTATG----- morL 18 1
-----TGGATTCTCTGTGAATCACTA----- mirL 22 1103
-----TGGATTCTCTGTGAATCACTAT----- mirL 23 145
-----GGATTCTCTGTGAATCACTA----- mirL 21 105
-----TGGATTCTCTGTGAATCACT----- mirL 21 82
-----TGGATTCTCTGTGAATCAC----- mirL 20 18
-----TGGATTCTCTGTGAATCA----- mirL 19 17
-----GGATTCTCTGTGAATCACTAT----- mirL 22 13
-----GATTCTCTGTGAATCACTA----- mirL 20 13
-----TGGATTCTCTGTGAATC----- mirL 18 5
-----GGATTCTCTGTGAATCAC----- mirL 19 5
-----TATGGATTCTCTGTGAAT----- mirL 19 4
-----TGGATTCTCTGTGAATCACTATA----- mirL 24 3
-----GGATTCTCTGTGAATCACT----- mirL 20 2
-----CTATGGATTCTCTGTGA----- mirL 18 1
-----ATTTCTCTGTGAATCACTA----- mirL 19 1
-----GATTCTCTGTGAATCACTAT----- mirL 21 1
-----GGATTCTCTGTGAATCA----- mirL 18 1

```

```

-----ATTTCTCTGTGAATCACT----- mirL 18 1
-----ATATCAAATCTAGTGTGGT----- loop 19 1
-----TATATCAAATCTAGTGTGGT----- loop 20 1
-----TATCAAATCTAGTGTGGT----- loop 18 1
-----TAGTGGTTTACAAAGTAATTCA----- mirR 22 206
-----TAGTGGTTTACAAAGTAA----- mirR 18 73
-----AGTGGTTTACAAAGTAATTCA----- mirR 21 56
-----TAGTGGTTTACAAAGTAATT----- mirR 20 53
-----TAGTGGTTTACAAAGTAATTCAT----- mirR 23 27
-----TAGTGGTTTACAAAGTAAT----- mirR 19 20
-----GTGGTTTACAAAGTAATTCA----- mirR 20 18
-----TAGTGGTTTACAAAGTAATTC----- mirR 21 9
-----GTGGTTTACAAAGTAATT----- mirR 18 9
-----AGTGGTTTACAAAGTAATT----- mirR 19 8
-----TGGTTTACAAAGTAATTCA----- mirR 19 6
-----AGTGGTTTACAAAGTAATTC----- mirR 20 5
-----AGTGGTTTACAAAGTAAT----- mirR 18 4
-----TAGTGGTTTACAAAGTAATTCATA----- mirR 24 3
-----TGGTTTACAAAGTAATTC----- mirR 18 3
-----GTGGTTTACAAAGTAATTC----- mirR 19 2
-----GTAGTGGTTTACAAAGTAA----- mirR 19 2
-----AGTGGTTTACAAAGTAATTCAT----- mirR 22 2
-----GTGGTTTACAAAGTAATTCAT----- mirR 21 1
-----TGGTTTACAAAGTAATTCAT----- mirR 20 1
-----AGTGGTTTACAAAGTAATTCATA----- mirR 23 1
-----GTGGTTTACAAAGTAATTCATA----- mirR 22 1
-----AGTGCTTCACAGGTGCTC----- morR 18 2
-----TCATAGTCTTCACAGGT----- morR 18 1
-----TGCTTCACAGGTGCTCCT morR 18 1
-----TAGTGCTTCACAGGTGCT----- morR 18 1

```

>mmu-mir-678

```

CTGTGACTTGCAGAGCTGTGCTCCAATATGAGAGATGGCCATGCACCCGTGTCTCGGTGCAAGGACTGGAGGTGGCAGTGTGCCAGTGGAC species len reads
CTGTGACTTGCAGAGCTG----- morL 18 1
-----CTTGCAGAGCTGTGCTCC----- morL 18 1
-----TCCAATATGAGAGATGGCC----- mirL 19 6
-----TCCAATATGAGAGATGGC----- mirL 18 4
-----GTCTCGGTGCAAGGACTGGAGGT----- mirR 23 810
-----GTCTCGGTGCAAGGACTGGAGG----- mirR 22 490
-----GTCTCGGTGCAAGGACTGGAG----- mirR 21 221
-----GTCTCGGTGCAAGGACTG----- mirR 18 219
-----GTCTCGGTGCAAGGACTGG----- mirR 19 134
-----GTCTCGGTGCAAGGACTGGA----- mirR 20 85
-----GTCTCGGTGCAAGGACTGGAGGT----- mirR 24 32
-----TCTCGGTGCAAGGACTGGAGGT----- mirR 22 5
-----CTCGGTGCAAGGACTGGAGGT----- mirR 21 5

```

```
-----CTCGGTGCAAGGACTGGAGG----- mirR 20 4
-----TCTCGGTGCAAGGACTGGAGG----- mirR 21 4
-----TCGGTGCAAGGACTGGAGG----- mirR 19 3
-----TCTCGGTGCAAGGACTGGAGG----- mirR 20 1
-----TCTCGGTGCAAGGACTGGAG----- mirR 19 1
-----TCTCGGTGCAAGGACTGGAG----- mirR 19 1
-----TCTCGGTGCAAGGACTGGAG----- mirR 20 1
-----TCTCGGTGCAAGGACTGGAGG----- mirR 23 1
-----TCGGTGCAAGGACTGGAG----- mirR 18 1
-----TCTCGGTGCAAGGACTGGAG----- mirR 23 1
-----TCTCGGTGCAAGGACTGGAG----- mirR 18 3
-----TCTCGGTGCAAGGACTGGAG----- mirR 18 1
-----TCTCGGTGCAAGGACTGGAG----- morR 18 3
-----TCTCGGTGCAAGGACTGGAG----- morR 18 1
```

>mmu-mir-1937b-3

```
AGAATTGGGGTAGGCCATAAATCCCGGACGAGCCCCACATGTAAGATCCCGAAGCTTAGTCTCTGCTCAAGTCCCGGGATGAGCTGGCTAGCACCCCAATGACTCAAGAGAAAACACACCTGATGCAAACCTGCAAGAG
AGAATTGGGGTAGGCCATA-----
```

```
-----ATCCCGGACGAGCCCCAC-----
-----TCCCGGACGAGCCCCACA-----
-----TCCCGGACGAGCCCCAC-----
-----ATCCCGGACGAGCCCCACA-----
-----AATCCCGGACGAGCCCCAC-----
-----ATCCCGGACGAGCCCCACAT-----
-----ATCCCGGACGAGCCCCACATG-----
-----AATCCCGGACGAGCCCCACA-----
-----TCCCGGACGAGCCCCACAT-----
-----CCCGGACGAGCCCCACA-----
-----AAATCCCGGACGAGCCCCAC-----
-----TCCCGGACGAGCCCCACATG-----
-----AATCCCGGACGAGCCCCACATG-----
-----AATCCCGGACGAGCCCCACAT-----
-----ATCCCGGACGAGCCCCACATGT-----
-----CCCGGACGAGCCCCACAT-----
-----CCGGACGAGCCCCACAT-----
-----AATCCCGGACGAGCCCCACATGT-----
-----CCCGGACGAGCCCCACATGTA-----
-----AAATCCCGGACGAGCCCCACA-----
-----TAAATCCCGGACGAGCCCCA-----
-----TCCCGGACGAGCCCCACATGT-----
```

>mmu-mir-684-1

```
GTAGGGATAAATTACTCTTGAACAAAATGATCCTAGATAGTTTTCCCTTCAAGTCAAGCGTCTTGCTGTTTAAATAAAC species len reads
---GGGATAAATTACTCTTGA----- mirL 18 1
GTAGGGATAAATTACTCT----- mirL 18 1
-----CTTGAACAAAATGATCCTA----- loop 19 1
```

```

-----TTGAACAAAATGATCCTA----- loop 18 1
-----AGTTTTCCCTTCAAGTCAA----- mirR 19 1316
-----AGTTTTCCCTTCAAGTCA----- mirR 18 533
-----AGTTTTCCCTTCAAGTCAAG----- mirR 20 104
-----GTTTTCCCTTCAAGTCAA----- mirR 18 24
-----AGTTTTCCCTTCAAGTCAAGC----- mirR 21 7
-----AGTTTTCCCTTCAAGTCAAGCG----- mirR 22 4
-----ATAGTTTTCCCTTCAAGTC----- mirR 19 4
-----ATAGTTTTCCCTTCAAGTCAA----- mirR 21 2
-----AGTTTTCCCTTCAAGTCAAGCGT----- mirR 23 2
-----TAGTTTTCCCTTCAAGTCAA----- mirR 20 1
-----ATAGTTTTCCCTTCAAGTCA----- mirR 20 1
-----GTTTTCCCTTCAAGTCAAG----- mirR 19 1
-----CAAGCGTCTTGCTGTTTA----- morR 18 2
-----GTCTTGCTGTTTAAATAAAC morR 20 1
-----GCGTCTTGCTGTTTAAATA----- morR 19 1
-----CAAGCGTCTTGCTGTTTAA----- morR 19 1

```

>mmu-mir-684-2

```

GTAGGGATAAATTACTCTTGAACAAAATGATCCTAGATAGTTTTCCCTTCAAGTCAAGTGTCTTGTTGTTTAAATGAA species len reads
---GGGATAAATTACTCTTGA----- mirL 18 1
GTAGGGATAAATTACTCT----- mirL 18 1
-----AGTTTTCCCTTCAAGTCAA----- mirR 19 1316
-----AGTTTTCCCTTCAAGTCA----- mirR 18 533
-----AGTTTTCCCTTCAAGTCAAG----- mirR 20 104
-----GTTTTCCCTTCAAGTCAA----- mirR 18 24
-----ATAGTTTTCCCTTCAAGTC----- mirR 19 4
-----AGTTTTCCCTTCAAGTCAAGTGC----- mirR 24 2
-----ATAGTTTTCCCTTCAAGTCAA----- mirR 21 2
-----AGTTTTCCCTTCAAGTCAAGTG----- mirR 22 2
-----TAGTTTTCCCTTCAAGTCAA----- mirR 20 1
-----ATAGTTTTCCCTTCAAGTCA----- mirR 20 1
-----GTTTTCCCTTCAAGTCAAG----- mirR 19 1
-----AGTTTTCCCTTCAAGTCAAGT----- mirR 21 1
-----GTTTTCCCTTCAAGTCAAGTGTCTTG----- mirR 26 1
-----AGTTTTCCCTTCAAGTCAAGTGT----- mirR 23 1
-----TCTTGTTGTTTAAATGAA morR 19 1
-----TCTTGTTGTTTAAATGA morR 18 1
-----GTCTTGTTGTTTAAATG-- morR 18 1

```

>mmu-mir-1949

```

CAGCCAATAGCTGGTTGGCATTCTGGGCCTGGTTCATGCCACCTCTGTTGTTAACTATACCAGGATGTCAGCATAGTTGCTTACCAGGAAGAGAAGC species len reads
CAGCCAATAGCTGGTTGG----- morL 18 1
---AATAGCTGGTTGGCATT----- morL 18 1
---CAATAGCTGGTTGGCATT----- morL 18 1
-----TCTGGGCCTGGTTCATGCC----- mirL 19 2

```



```

-----GCCACCTCTGTTGTTAAC----- loop 18 1
-----CTATACCAGGATGTCAGCATAG----- mirR 22 730
-----CTATACCAGGATGTCAGCATAGTT----- mirR 24 561
-----CTATACCAGGATGTCAGCATA----- mirR 21 152
-----CTATACCAGGATGTCAGCATAGT----- mirR 23 132
-----CTATACCAGGATGTCAGCATAGTTG----- mirR 25 49
-----CTATACCAGGATGTCAGCAT----- mirR 20 44
-----TATACCAGGATGTCAGCATAGTT----- mirR 23 42
-----ATACCAGGATGTCAGCATAGTT----- mirR 22 37
-----TATACCAGGATGTCAGCATAG----- mirR 21 36
-----ATACCAGGATGTCAGCATAG----- mirR 20 29
-----CTATACCAGGATGTCAGCA----- mirR 19 29
-----TACCAGGATGTCAGCATAGTT----- mirR 21 19
-----TACCAGGATGTCAGCATAG----- mirR 19 16
-----TATACCAGGATGTCAGCATA----- mirR 20 15
-----TATACCAGGATGTCAGCATAGT----- mirR 22 9
-----ATACCAGGATGTCAGCATAGT----- mirR 21 7
-----ATACCAGGATGTCAGCAT----- mirR 18 5
-----ATACCAGGATGTCAGCATA----- mirR 19 5
-----TATACCAGGATGTCAGCATAGTTG----- mirR 24 4
-----TACCAGGATGTCAGCATAGT----- mirR 20 4
-----TATACCAGGATGTCAGCAT----- mirR 19 4
-----TACCAGGATGTCAGCATA----- mirR 18 4
-----TATACCAGGATGTCAGCA----- mirR 18 4
-----ACTATACCAGGATGTCAGCATAG----- mirR 23 2
-----TACCAGGATGTCAGCATAGTTGCTTACC----- mirR 28 1
-----TACCAGGATGTCAGCATAGTTG----- mirR 22 1
-----ACTATACCAGGATGTCAGC----- mirR 19 1
-----ACTATACCAGGATGTCAGCATAGT----- mirR 24 1
-----ATACCAGGATGTCAGCATAGTTG----- mirR 23 1
-----AACTATACCAGGATGTCAGCATAGTT----- mirR 26 1
-----AACTATACCAGGATGTCA----- mirR 18 1
-----TAGTTGCTTACCCAGGAA----- morR 18 2
-----CTTACCCAGGAAGAGAAGC morR 19 2
-----CTTACCCAGGAAGAGAAG- morR 18 2
-----TTGCTTACCCAGGAAGAG- morR 18 1
-----GTTGCTTACCCAGGAAGAG- morR 19 1

```

>mmu-mir-207

```

AGCAAGGCAGGGGTGAGGGCTGCGGGAGGAGCCGGGCGGAGGCTGCGGCTTGCCTTCTCCTGGCTCTCCTCCCTCTCTTTGTTGAGGTTTCGACCTC species len reads
AGCAAGGCAGGGGTGAGGG----- morL 19 2
--CAAGGCAGGGGTGAGGG----- morL 18 1
---AAGGCAGGGGTGAGGGC----- morL 18 1
-----CTGCGGGAGGAGCCGGGC----- mirL 18 5
-----CTGCGGGAGGAGCCGGGCG----- mirL 19 2
-----CTGCGGGAGGAGCCGGGCGAG----- mirL 22 1

```

```

-----GGAGGCTGCGGCTTGCGC----- loop 18 2
-----GCTTCTCCTGGCTCTCCTCCCTC----- mirR 23 1278
-----GCTTCTCCTGGCTCTCCTCCCTCT----- mirR 24 298
-----GCTTCTCCTGGCTCTCCTCCCT----- mirR 22 200
-----GCTTCTCCTGGCTCTCCTCCC----- mirR 21 38
-----GCTTCTCCTGGCTCTCCTCCCTC----- mirR 25 22
-----CTTCTCCTGGCTCTCCTCCCTC----- mirR 22 18
-----GCTTCTCCTGGCTCTCCT----- mirR 18 17
-----GCTTCTCCTGGCTCTCCTCC----- mirR 20 11
-----TCTCCTGGCTCTCCTCCCTC----- mirR 20 10
-----TTCTCCTGGCTCTCCTCCCTC----- mirR 21 8
-----CTTCTCCTGGCTCTCCTCCCTCT----- mirR 23 4
-----TCTCCTGGCTCTCCTCCCTCT----- mirR 21 4
-----CGCTTCTCCTGGCTCTCCTCCCTC----- mirR 24 2
-----TCTCCTGGCTCTCCTCCCT----- mirR 19 2
-----CTTCTCCTGGCTCTCCTCCC----- mirR 20 1
-----CTTCTCCTGGCTCTCCTCCCT----- mirR 21 1
-----GCGCTTCTCCTGGCTCTCCTCCCTC----- mirR 25 1
-----CTTCTCCTGGCTCTCCTCCCTCTC----- mirR 24 1
-----TTCTCCTGGCTCTCCTCC----- mirR 18 1
-----TTCTCCTGGCTCTCCTCCCT----- mirR 20 1
-----TCTCCTGGCTCTCCTCCCTCTCTTT----- mirR 25 1
-----TTCTCCTGGCTCTCCTCCCTCT----- mirR 22 1
-----TTCTCCTGGCTCTCCTCCCTCTC----- mirR 23 1
-----TCTCCTGGCTCTCCTCCC----- mirR 18 1
-----CTTCTCCTGGCTCTCCTC----- mirR 18 1
-----TTTGTGAGGTTTCGACCTC morR 19 2
-----CTCTTTGTTGAGGTTTCGA---- morR 18 1
-----TTTGTGAGGTTTCGACCT- morR 18 1
-----TCTTTGTTGAGGTTTCGAC--- morR 18 1
-----CTCTCTTTGTTGAGGTTTC----- morR 18 1
-----TCTTTGTTGAGGTTTCGACC-- morR 19 1

```

>mmu-mir-3106

```

TGTC CCCAGGGAAGCACAGGTGGCTCATT TAGAAGCAGCCATACTCAGAGAGTGGCTGCCTATACATGGGCTTTCCTGTGCTCCTCTCCTGTTGCCAC species len reads
---CCCCAGGGAAGCACAGGT----- morL 18 1
TGTC CCCAGGGAAGCACACA----- morL 18 1
---CCCCAGGGAAGCACAGGTG----- morL 19 1
--TCCCAGGGAAGCACAGG----- morL 18 1
-GTCCCAGGGAAGCACAG----- morL 18 1
-----TGGCTCATT TAGAAGCAGCC----- mirL 20 558
-----TGGCTCATT TAGAAGCAGCCA----- mirL 21 512
-----TGGCTCATT TAGAAGCAGC----- mirL 19 327
-----TGGCTCATT TAGAAGCAGCCAT----- mirL 22 158
-----TGGCTCATT TAGAAGCAGCCATA----- mirL 23 69
-----TGGCTCATT TAGAAGCAG----- mirL 18 67

```

```
-----TGGCTCATTTAGAAGCAGCCATAC----- mirL 24 60
-----GGCTCATTTAGAAGCAGCCA----- mirL 20 11
-----GGCTCATTTAGAAGCAGCC----- mirL 19 7
-----GGCTCATTTAGAAGCAGC----- mirL 18 6
-----GGCTCATTTAGAAGCAGCCATAC----- mirL 23 3
-----GGCTCATTTAGAAGCAGCCAT----- mirL 21 2
-----GTGGCTCATTTAGAAGCA----- mirL 18 1
-----GGCTCATTTAGAAGCAGCCATA----- mirL 22 1
-----GCTCATTTAGAAGCAGCC----- mirL 18 1
-----CCATACACTCAGAGAGTG----- loop 18 1
-----ATACACTCAGAGAGTGGCT----- loop 19 1
-----GCCATACACTCAGAGAGT----- loop 18 1
-----GCTGCCTATACATGGGCTTTCC----- mirR 22 68
-----GCTGCCTATACATGGGCTTTCC----- mirR 21 17
-----GCTGCCTATACATGGGCTTTCCCT----- mirR 23 13
-----TGGCTGCCTATACATGGGCTTTCC----- mirR 23 8
-----GGCTGCCTATACATGGGCTTTCC----- mirR 23 7
-----CTGCCTATACATGGGCTTTCC----- mirR 21 7
-----CTGCCTATACATGGGCTTTCCCT----- mirR 22 4
-----GGCTGCCTATACATGGGCTTTCC----- mirR 22 3
-----GCTGCCTATACATGGGCTTT----- mirR 19 3
-----TGGCTGCCTATACATGGGCTTTCC----- mirR 24 3
-----GCTGCCTATACATGGGCTTTCCCTG----- mirR 24 2
-----TGGCTGCCTATACATGGGCTTTCCCT----- mirR 25 1
-----GGCTGCCTATACATGGGCTTT----- mirR 21 1
-----TGGCTGCCTATACATGGG----- mirR 18 1
-----GCTGCCTATACATGGGCTTT----- mirR 20 1
-----GGCTGCCTATACATGGGC----- mirR 18 1
-----TGTGCTCCTCTCCTGTTG---- morR 18 2
-----GCTCCTCTCCTGTTGCCAC morR 19 2
-----CTGTGCTCCTCTCCTGTTG---- morR 19 1
-----TGTGCTCCTCTCCTGTTGCCAC morR 22 1
-----CCTGTGCTCCTCTCCTGTTG---- morR 20 1
-----GCTCCTCTCCTGTTGCCA- morR 18 1
-----TGTGCTCCTCTCCTGTTGC--- morR 19 1
```

>mmu-mir-1195

```
GTAGAGGCAGGCAGATCTCTGTGAGTTCGAGGCCAGCCTGCTCAACAGAATGAGTTCTAGGGCAGCCAGGAACACACAGAGAAACCCTGTCTCAAGAAGGTA AAAAGTAAAAAAAAAAAAAAAAAGAAAAAGTAAAAAGA
GTAGAGGCAGGCAGATCT-----
GTAGAGGCAGGCAGATCTC-----
-----TGAGTTCGAGGCCAGCCTGCTCA-----
-----TGTGAGTTCGAGGCCAGCCTGC-----
-----TGAGTTCGAGGCCAGCCTGCTCAA-----
-----CTGTGAGTTCGAGGCCAGCCTGC-----
-----TGAGTTCGAGGCCAGCCTGCTC-----
-----GAGTTCGAGGCCAGCCTGCTCA-----
```

-----TGAGTTCGAGGCCAGCCTGCT-----  
-----TGAGTTCGAGGCCAGCCTGC-----  
-----TGAGTTCGAGGCCAGCCTGCTCAAC-----  
-----GAGTTCGAGGCCAGCCTGCTCAA-----  
-----GTTTCGAGGCCAGCCTGCTCA-----  
-----AGTTCGAGGCCAGCCTGCTCA-----  
-----TGAGTTCGAGGCCAGCCTGCTCAACA-----  
-----TGTGAGTTCGAGGCCAGCC-----  
-----GTTTCGAGGCCAGCCTGCTCAA-----  
-----GAGTTCGAGGCCAGCCTGC-----  
-----TGTGAGTTCGAGGCCAGC-----  
-----GAGTTCGAGGCCAGCCTGCTC-----  
-----GTGAGTTCGAGGCCAGCC-----  
-----AGTTCGAGGCCAGCCTGCT-----  
-----GAGTTCGAGGCCAGCCTGCT-----  
-----CTGTGAGTTCGAGGCCAGCC-----  
-----AGTTCGAGGCCAGCCTGCTCAA-----  
-----TGTGAGTTCGAGGCCAGCCTG-----  
-----AGTTCGAGGCCAGCCTGC-----  
-----AGTTCGAGGCCAGCCTGCTC-----  
-----GTGAGTTCGAGGCCAGCCTG-----  
-----TGTGAGTTCGAGGCCAGCCT-----  
-----GTGAGTTCGAGGCCAGCCT-----  
-----CTGTGAGTTCGAGGCCAGCCTG-----  
-----AGTTCGAGGCCAGCCTGCTCAACA-----  
-----GAGTTCGAGGCCAGCCTGCTCAAC-----  
-----AGTTCGAGGCCAGCCTGCTCAAC-----  
-----TGTGAGTTCGAGGCCAGCCTGCT-----  
-----CTGTGAGTTCGAGGCCAG-----  
-----GTGAGTTCGAGGCCAGCCTGCTCA-----  
-----GTTTCGAGGCCAGCCTGCTC-----  
-----AAAAGA-----  
-----AAAAAGA-----  
-----AAAGA-----  
-----AAAAAGA-----  
-----TAAAAAGA-----  
-----AAGA-----  
-----TAAAAAGA-----  
-----AAAAAGA-----  
-----AAGA-----  
-----AAGA-----  
-----AAAAGA-----  
-----AAAAAGA-----  
-----TAAAAAGA-----  
-----AGA-----  
-----AAAAGA-----



```

-----AACTGCAGAGTGAGACCCTGT----- mirL 21 3
-----AACTGCAGAGTGAGACCCTGTT----- mirL 22 2
-----TGCAGAGTGAGACCCTGTTG----- mirL 20 2
-----CTGCAGAGTGAGACCCTGTTG----- mirL 21 2
-----GCAGAGTGAGACCCTGTT----- mirL 18 2
-----GCAGAGTGAGACCCTGTTG----- mirL 19 1
-----AACTGCAGAGTGAGACCCT----- mirL 19 1
-----AACTGCAGAGTGAGACCCTGTTG----- mirL 24 1
-----TTGTTTGTGTTTGTGTTGAGACGGGGTT----- loop 25 1
-----TCTCTGTGTAGCCCTGGC----- mirR 18 18
-----GTTTCTCTGTGTAGCCCT----- mirR 18 9
-----GTTTCTCTGTGTAGCCCTGGC----- mirR 21 8
-----TTTCTCTGTGTAGCCCTG----- mirR 18 5
-----GTTTCTCTGTGTAGCCCTGG----- mirR 20 4
-----TTTCTCTGTGTAGCCCTGGC----- mirR 20 4
-----TTCTCTGTGTAGCCCTGGC----- mirR 19 4
-----TTTCTCTGTGTAGCCCTGGCT----- mirR 21 3
-----TCTGTGTAGCCCTGGCTATCC----- mirR 21 3
-----TTTCTCTGTGTAGCCCTGG----- mirR 19 3
-----TCTCTGTGTAGCCCTGGCT----- mirR 19 1
-----TTCTCTGTGTAGCCCTGGCTATCC----- mirR 24 1
-----TCTGTGTAGCCCTGGCTATC----- mirR 20 1
-----TCTCTGTGTAGCCCTGGCTAT----- mirR 21 1
-----TCTCTGTGTAGCCCTGGCTA----- mirR 20 1
-----CTGTGTAGCCCTGGCTATCCT----- mirR 21 1
-----CTCTGTGTAGCCCTGGCT----- mirR 18 1
-----GTTTCTCTGTGTAGCCCTG----- mirR 19 1
-----GTTTCTCTGTGTAGCCCTGGCT----- mirR 22 1
-----CTGTGTAGCCCTGGCTATCCTAGAACT----- mirR 27 1
-----TCTCTGTGTAGCCCTGGCTATC----- mirR 22 1
-----GCTATCCTAGAACTCACTCTG----- morR 21 2
-----GGCTATCCTAGAACTCACTCTG----- morR 22 2
-----ATCCTAGAACTCACTCTG----- morR 18 2
-----CTATCCTAGAACTCACTC----- morR 18 2
-----CCTAGAACTCACTCTGGAGACCAGG----- morR 25 1
-----TCCTAGAACTCACTCTGGAGACCA----- morR 24 1
-----CCTAGAACTCACTCTGGAG----- morR 19 1
-----GGCTATCCTAGAACTCACT----- morR 19 1
-----CCTAGAACTCACTCTGGAGA----- morR 20 1
-----GGCTATCCTAGAACTCACTCTGGAGACCAGGC morR 32 1
-----CCTAGAACTCACTCTGGAGAC----- morR 21 1
-----GCTATCCTAGAACTCACT----- morR 18 1
-----GCTATCCTAGAACTCACTCT----- morR 20 1
-----TATCCTAGAACTCACTCT----- morR 18 1

```

>mmu-mir-450b

|                                                                                                      | species | len | reads |
|------------------------------------------------------------------------------------------------------|---------|-----|-------|
| GGAATCAGATACAGAATTATTTTTGCAGTATGTTCTGAATACATAACATAAGCGTATTGGGAACATTTTGCATGCATAATTTTGTATCAATATATGGGGG | morL    | 18  | 1     |
| GGAATCAGATACAGAATT-----TTTTGCAGTATGTTCTGA-----                                                       | mirL    | 20  | 593   |
| -----TTTTGCAGTATGTTCTGAAT-----                                                                       | mirL    | 21  | 190   |
| -----TTTTGCAGTATGTTCTGA-----                                                                         | mirL    | 19  | 142   |
| -----TTTTGCAGTATGTTCTG-----                                                                          | mirL    | 18  | 88    |
| -----TTTGCAGTATGTTCTGAA-----                                                                         | mirL    | 19  | 59    |
| -----TTTTGCAGTATGTTCTGAATA-----                                                                      | mirL    | 22  | 47    |
| -----TTTGCAGTATGTTCTGAAT-----                                                                        | mirL    | 20  | 47    |
| -----TTTGCAGTATGTTCTGA-----                                                                          | mirL    | 18  | 23    |
| -----TTGCAGTATGTTCTGAA-----                                                                          | mirL    | 18  | 23    |
| -----TTTTGCAGTATGTTCTGAATAC-----                                                                     | mirL    | 23  | 22    |
| -----TGCAGTATGTTCTGAAT-----                                                                          | mirL    | 18  | 19    |
| -----TTGCAGTATGTTCTGAAT-----                                                                         | mirL    | 19  | 8     |
| -----TTTGCAGTATGTTCTGAATA-----                                                                       | mirL    | 21  | 8     |
| -----TGCAGTATGTTCTGAATA-----                                                                         | mirL    | 19  | 4     |
| -----TGCAGTATGTTCTGAATAC-----                                                                        | mirL    | 20  | 3     |
| -----TTTTTGCAGTATGTTCTGAA-----                                                                       | mirL    | 21  | 3     |
| -----TTTGCAGTATGTTCTGAATAC-----                                                                      | mirL    | 22  | 2     |
| -----TTTTTGCAGTATGTTCTGAAT-----                                                                      | mirL    | 22  | 1     |
| -----TTTTTGCAGTATGTTCT-----                                                                          | mirL    | 18  | 1     |
| -----TTTGCAGTATGTTCTGAATACA-----                                                                     | mirL    | 23  | 1     |
| -----TTGCAGTATGTTCTGAATA-----                                                                        | mirL    | 20  | 1     |
| -----TTTTGCAGTATGTTCTGAATACATA-----                                                                  | mirL    | 26  | 1     |
| -----AATACATAACATAAGCGTA-----                                                                        | loop    | 19  | 1     |
| -----ATACATAACATAAGCGTA-----                                                                         | loop    | 18  | 1     |
| -----ATTGGGAACATTTTGCATGCAT-----                                                                     | mirR    | 22  | 274   |
| -----ATTGGGAACATTTTGCATGCATA-----                                                                    | mirR    | 23  | 56    |
| -----ATTGGGAACATTTTGCATGC-----                                                                       | mirR    | 20  | 50    |
| -----ATTGGGAACATTTTGCATGCA-----                                                                      | mirR    | 21  | 42    |
| -----GTATTGGGAACATTTTGC-----                                                                         | mirR    | 18  | 36    |
| -----TATTGGGAACATTTTGCATGC-----                                                                      | mirR    | 21  | 26    |
| -----GTATTGGGAACATTTTGCA-----                                                                        | mirR    | 19  | 16    |
| -----ATTGGGAACATTTTGCATG-----                                                                        | mirR    | 19  | 15    |
| -----ATTGGGAACATTTTGCATGCATAA-----                                                                   | mirR    | 24  | 14    |
| -----TATTGGGAACATTTTGCATGCA-----                                                                     | mirR    | 22  | 10    |
| -----GTATTGGGAACATTTTGCAT-----                                                                       | mirR    | 20  | 7     |
| -----TGGGAACATTTTGCATGCAT-----                                                                       | mirR    | 20  | 7     |
| -----TTGGGAACATTTTGCATGCAT-----                                                                      | mirR    | 21  | 5     |
| -----TGGGAACATTTTGCATGCA-----                                                                        | mirR    | 19  | 4     |
| -----TTGGGAACATTTTGCATGC-----                                                                        | mirR    | 19  | 4     |
| -----GGGAACATTTTGCATGCAT-----                                                                        | mirR    | 19  | 3     |
| -----TATTGGGAACATTTTGCATG-----                                                                       | mirR    | 20  | 3     |
| -----GGGAACATTTTGCATGCA-----                                                                         | mirR    | 18  | 3     |
| -----TTGGGAACATTTTGCATG-----                                                                         | mirR    | 18  | 2     |
| -----TTGGGAACATTTTGCATGCA-----                                                                       | mirR    | 20  | 2     |

C:\Documents and Settings\hong\Desktop\Hippocampus-total RNA.txt

```
-----TTGGGAACATTTTGCATGCATA----- mirR 22 2
-----TATTGGGAACATTTTGCATGCAT----- mirR 23 1
-----ATTGGGAACATTTTGCATGCATAATT----- mirR 26 1
-----GTATTGGGAACATTTTGCATGC----- mirR 22 1
-----TTGGGAACATTTTGCATGCATAA----- mirR 23 1
-----TGGGAACATTTTGCATGC----- mirR 18 1
-----CGTATTGGGAACATTTTG----- mirR 18 1
-----TTGTATCAATATATG GGGG morR 20 1
-----TAATTTGTATCAATATA----- morR 18 1
```

>mmu-mir-1306

```
CCTGCAAACGTCCAGTGATGCAGAGTAATGGACGTTGGCTCTGGTGGTGATGGACAGTCCGAACCTCCTGCCGACGACCCATCAACTTCTACGGAGCTTCTCTTCTCTCCAAAGGATCCTTCTCTAAGGGCCGC spec
CCTGCAAACGTCCAGTGATGCAGAGTAATGGAC----- morL
-----ACGTTGGCTCTGGTGGTGATG----- mirL
-----ACGTTGGCTCTGGTGGTG----- mirL
-----ACGTTGGCTCTGGTGGTGATG----- mirL
-----ACGTTGGCTCTGGTGGTGA----- mirL
-----ACGTTGGCTCTGGTGGTGAT----- mirL
-----ACGTTGGCTCTGGTGGTGATGGAC----- mirL
-----ACGTTGGCTCTGGTGGTGATGGA----- mirL
-----CGTTGGCTCTGGTGGTGATG----- mirL
-----GACGTTGGCTCTGGTGGTGATG----- mirL
-----GACGTTGGCTCTGGTGGTG----- mirL
-----GACGTTGGCTCTGGTGGTGA----- mirL
-----GACGTTGGCTCTGGTGGTGAT----- mirL
-----GTTGGCTCTGGTGGTGATG----- mirL
-----GACGTTGGCTCTGGTGGTGATGG----- mirL
-----CGTTGGCTCTGGTGGTGATGG----- mirL
-----GACGTTGGCTCTGGTGGT----- mirL
-----CGTTGGCTCTGGTGGTGA----- mirL
-----TTGGCTCTGGTGGTGATG----- mirL
-----GTTGGCTCTGGTGGTGAT----- mirL
-----GTTGGCTCTGGTGGTGATGG----- mirL
-----TGGACGTTGGCTCTGGTGGTG----- mirL
-----CTTCTCTTCTCTCCAAAG----- mirR
-----CTTCTCTTCTCTCCAAAGG----- mirR
-----GCTTCTCTTCTCTCCAAA----- mirR
-----CTTCTCTCTCCAAAGGATCCT----- mirR
-----AGCTTCTTCTCTCCAA----- mirR
-----TCTTCTCTCTCCAAAGGA----- mirR
-----TTCTCTTCTCTCCAAAGG----- mirR
-----TCCTTCTCTAAGGGCCGC morR
-----GGATCCTTCTCTAAGGGCCG- morR
```

>mmu-mir-10a

```
AGACCTGTCTGTCTTCTGTATATACCCTGTAGATCCGAATTTGTGTAAGGAATTTGTGGTCACAAATTCGTATCTAGGGGAATAGTGTGACATAAAC species len reads
```



```

AGACCTGTCTGTCTTCTGTATA----- morL 22 2
-GACCTGTCTGTCTTCTGT----- morL 18 1
---CCTGTCTGTCTTCTGTATA----- morL 19 1
-----TACCCTGTAGATCCGAATTTGT----- mirL 22 437
-----TACCCTGTAGATCCGAATTTG----- mirL 21 288
-----TACCCTGTAGATCCGAATTTGTG----- mirL 23 177
-----TACCCTGTAGATCCGAAT----- mirL 18 143
-----TACCCTGTAGATCCGAATTT----- mirL 20 142
-----TACCCTGTAGATCCGAATT----- mirL 19 141
-----ACCCTGTAGATCCGAATTTGT----- mirL 21 83
-----ACCCTGTAGATCCGAATTTGTGT----- mirL 23 48
-----ACCCTGTAGATCCGAATTTGTG----- mirL 22 41
-----TACCCTGTAGATCCGAATTTGTGT----- mirL 24 34
-----ACCCTGTAGATCCGAATTTG----- mirL 20 28
-----ACCCTGTAGATCCGAATTT----- mirL 19 13
-----CCCTGTAGATCCGAATTTGT----- mirL 20 10
-----ACCCTGTAGATCCGAATT----- mirL 18 9
-----CCTGTAGATCCGAATTTGT----- mirL 19 9
-----CCCTGTAGATCCGAATTTG----- mirL 19 9
-----ACCCTGTAGATCCGAATTTGTGTAA----- mirL 25 6
-----CCTGTAGATCCGAATTTG----- mirL 18 4
-----CCCTGTAGATCCGAATTTGTG----- mirL 21 4
-----CCCTGTAGATCCGAATTTGTGT----- mirL 22 3
-----CCCTGTAGATCCGAATTTGTGTA----- mirL 23 2
-----CCTGTAGATCCGAATTTGTG----- mirL 20 2
-----ATACCCTGTAGATCCGAAT----- mirL 19 1
-----CCCTGTAGATCCGAATTT----- mirL 18 1
-----TGTAAGGAATTTGTGGT----- loop 18 4
-----AGGAATTTGTGGTCACA----- loop 18 2
-----CAAATTCGTATCTAGGGGAAT----- mirR 21 35
-----CAAATTCGTATCTAGGGGAA----- mirR 20 35
-----CAAATTCGTATCTAGGGGAATA----- mirR 22 19
-----CAAATTCGTATCTAGGGGA----- mirR 19 18
-----CAAATTCGTATCTAGGGG----- mirR 18 17
-----AATTCGTATCTAGGGGAATA----- mirR 20 9
-----AAATTCGTATCTAGGGGAATA----- mirR 21 8
-----CAAATTCGTATCTAGGGGAATAT----- mirR 23 7
-----AATTCGTATCTAGGGGAAT----- mirR 19 7
-----AATTCGTATCTAGGGGAA----- mirR 18 5
-----ATTTCGTATCTAGGGGAAT----- mirR 18 5
-----ATTCGTATCTAGGGGAATA----- mirR 19 5
-----AAATTCGTATCTAGGGGAA----- mirR 19 4
-----AAATTCGTATCTAGGGGAAT----- mirR 20 2
-----AAATTCGTATCTAGGGGAATAT----- mirR 22 2
-----ACAAATTCGTATCTAGGGGAA----- mirR 21 1
-----AATTCGTATCTAGGGGAATAT----- mirR 21 1

```

```
-----TCACAAATTCGTATCTAGGGGA----- mirR 22 1
-----TATGTAGTTGACATAAAC morR 18 1
-----AATATGTAGTTGACATAAAC morR 20 1

>mmu-mir-719
TTTTAGGTGCTTAAAGAACAGTATCTCGGCTACAGAAAAATGTTTTGGGTGATGCTGTGGATGTGTTGAAGCCAGGAGAACAGAAGCCAAGAAGTGGCAGAATGCACCCAGAGTTACTACTGGACCCACTCCTTTCAGC
---TAGGTGCTTAAAGAACAGTA-----
TTTTAGGTGCTTAAAGAAC-----
-----ATCTCGGCTACAGAAAAATGT-----
-----ATCTCGGCTACAGAAAAATG-----
-----ATCTCGGCTACAGAAAAATGTT-----
-----ATCTCGGCTACAGAAAAA-----
-----ATCTCGGCTACAGAAAAAT-----
-----ATCTCGGCTACAGAAAAATGTTT-----
-----CTCGGCTACAGAAAAATGT-----
-----TCGGCTACAGAAAAATGT-----
-----ATCTCGGCTACAGAAAAATGTTTT-----
-----TCTCGGCTACAGAAAAATGT-----
-----CTCGGCTACAGAAAAATG-----
-----TCTCGGCTACAGAAAAATGTT-----
-----TATCTCGGCTACAGAAAAA-----
-----CTCGGCTACAGAAAAATGTT-----
-----TCTCGGCTACAGAAAAAT-----
-----TCGGCTACAGAAAAATGTT-----
-----CTCGGCTACAGAAAAATGTTT-----
-----TCTCGGCTACAGAAAAATGTTT-----
-----TATCTCGGCTACAGAAAAATG-----
-----TCTCGGCTACAGAAAAATG-----
-----TATCTCGGCTACAGAAAAATGT-----
-----GAGTTACTACTGGACCCA-----
-----AGAGTTACTACTGGACCCA-----
-----AGAGTTACTACTGGACCC-----
-----GAGTTACTACTGGACCCACT-----
-----CAGAGTTACTACTGGACC-----
-----GAGTTACTACTGGACCCAC-----
-----CTCCTTTCAGC-----
-----CCACTCCTTTCAGC-----
-----ACTCCTTTCAGC-----
-----CCACTCCTTTCAGC-----
-----TCCTTTCAGC-----
-----CACTCCTTTCAGC-----
-----CTCCTTTCAGC-----

>mmu-mir-713
TCCGAGGCCCTGATTGGTTAGTGAGACTTGATTGACATGAGCACCTCCCTTAGGGTTAGAGTGCAGTGAAGGCACACAGCATAGGGCTTCCAAGATC species len reads
-CCGAGGCCCTGATTGGT----- mirL 18 5
```

```

TCCGGAGGCCCTGATTGG----- mirL 18 4
--CGGAGGCCCTGATTGGTT----- mirL 18 1
TCCGGAGGCCCTGATTGGT----- mirL 19 1
-----TGCACTGAAGGCACACAG----- mirR 18 1245
-----TGCACTGAAGGCACACAGC----- mirR 19 374
-----TGCACTGAAGGCACACAGCA----- mirR 20 119
-----GCACTGAAGGCACACAGC----- mirR 18 23
-----TGCACTGAAGGCACACAGCAT----- mirR 21 15
-----TGCACTGAAGGCACACAGCATA----- mirR 22 7
-----GCACTGAAGGCACACAGCA----- mirR 19 4
-----GAGTGCCTGAAGGCACAC----- mirR 19 3
-----AGTGCCTGAAGGCACAC----- mirR 18 3
-----GCACTGAAGGCACACAGCATA----- mirR 21 1
-----CACTGAAGGCACACAGCA----- mirR 18 1
-----ACTGAAGGCACACAGCAT----- mirR 18 1
-----GTGCACTGAAGGCACACAG----- mirR 19 1
-----CATAGGGCTTCCAAGATC morR 18 1

```

>mmu-mir-1903

```

AACTCCTCCCCTCTTTTTTTCCTCCTTCTTCTTCTCCTGAGACATGGCCCGGCAGTGGCTCCTGGAAGAGGAACAAGTGTGGGAAAAGGGAGAG species len reads
---CCTCCCCTCTTTTTTTC----- morL 18 111
---TCCTCCCCTCTTTTTTT----- morL 18 9
---CTCCTCCCCTCTTTTTTT----- morL 19 9
---CCTCCCCTCTTTTTTTC----- morL 19 8
---TCCTCCCCTCTTTTTTTC----- morL 19 7
---CCCTCTTTTTTTCCTCCT----- morL 19 5
---CTCCTCCCCTCTTTTTTTC----- morL 21 4
---CTCCTCCCCTCTTTTTTTC----- morL 20 4
---CTCCCCTCTTTTTTTCCT----- morL 19 3
---CTCCCCTCTTTTTTTCCTC----- morL 20 3
---TCCTCCCCTCTTTTTTTC----- morL 20 3
---CCCTCTTTTTTTCCTC----- morL 18 3
---CCTCCCCTCTTTTTTTCCTC----- morL 21 2
---CCCTCTTTTTTTCCTC----- morL 18 2
---CCTCTTTTTTTCCTCCT----- morL 18 2
---TCCCTCTTTTTTTCCT----- morL 18 2
---TCCCCTCTTTTTTTCCTCCT----- morL 21 2
---CCTCCCCTCTTTTTTTCCT----- morL 20 1
---CTCCCCTCTTTTTTTC----- morL 18 1
---TCCCTCTTTTTTTCCTC----- morL 20 1
---TCCCCTCTTTTTTTCCTC----- morL 19 1
AACTCCTCCCCTCTTTTTTT----- morL 21 1
-----CCTTCTTCTTCTCCTGAGACA----- mirL 22 873
-----CCTTCTTCTTCTCCTGAGACAT----- mirL 23 240
-----CCTTCTTCTTCTCCTGAGAC----- mirL 21 149
-----CCTTCTTCTTCTCCTGAGA----- mirL 20 36

```

```

-----CCTTCTTCTTCTTCTCTGA----- mirL 18 24
-----CCTTCTTCTTCTTCTGAG----- mirL 19 21
-----CTCCTTCTTCTTCTTCT----- mirL 18 17
-----CCTTCTTCTTCTTCTGAGACATG----- mirL 24 17
-----TCTTCTTCTTCTTCTGAGACA----- mirL 19 14
-----CTTCTTCTTCTTCTGAGACA----- mirL 21 11
-----TCTTCTTCTTCTTCTGAGAC----- mirL 18 11
-----CCTCCTTCTTCTTCTTCC----- mirL 18 9
-----TCCTTCTTCTTCTTCTCTG----- mirL 18 5
-----CCTCCTTCTTCTTCTTCTCTG----- mirL 20 4
-----TTCTTCTTCTTCTTCTGAGA----- mirL 18 4
-----CTCCTTCTTCTTCTTCTCTG----- mirL 19 3
-----TCCTTCTTCTTCTTCTCTGA----- mirL 19 3
-----TTCTTCTTCTTCTTCTGAGACA----- mirL 20 3
-----CCTCCTTCTTCTTCTTCTTCT----- mirL 19 2
-----CTTCTTCTTCTTCTTCTGAGAC----- mirL 20 2
-----CTTCTTCTTCTTCTTCTGAG----- mirL 18 2
-----CTTCTTCTTCTTCTTCTGAGA----- mirL 19 2
-----CCTCCTTCTTCTTCTTCTCTGAG----- mirL 22 1
-----TCTTCTTCTTCTTCTGAGACAT----- mirL 20 1
-----CTTCTTCTTCTTCTTCTGAGACAT----- mirL 22 1
-----TTCTTCTTCTTCTTCTGAGAC----- mirL 19 1
-----TCCTTCTTCTTCTTCTGAGACA----- mirL 23 1
-----CCTCCTTCTTCTTCTTCTCTGA----- mirL 21 1
-----TCCTTCTTCTTCTTCTGAGA----- mirL 21 1
-----TCCTTCTTCTTCTTCTGAG----- mirL 20 1
-----TGGCTCCTGGAAGAGGAA----- mirR 18 76
-----TGGCTCCTGGAAGAGGAA----- mirR 19 7
-----GGCTCCTGGAAGAGGAA----- mirR 18 3
-----AGTGGCTCCTGGAAGAGG----- mirR 18 1
-----CTCCTGGAAGAGGAACAA----- mirR 18 1
-----AGTGGCTCCTGGAAGAGGAA----- mirR 20 1
-----CAGTGGCTCCTGGAAGAGGA----- mirR 20 1
-----AGTGTGGGAAAAGGGAGA----- morR 18 45
-----AGTGTGGGAAAAGGGAGAG----- morR 19 2
-----GAACAAGTGTGGGAAAAG----- morR 18 1
-----AACAAAGTGTGGGAAAAG----- morR 18 1

```

>mmu-mir-493

```

CTTGATACATGGTAGGCTTTTCATTCATTTTTTGCACATTCGGTGAAGGTCTACTGTGTGCCAGGCCCTGTGC species len reads
--TTGTACATGGTAGGCTTTTCATT----- mirL 22 614
--TTGTACATGGTAGGCTTTTCATTC----- mirL 23 347
--TTGTACATGGTAGGCTTTTCAT----- mirL 21 231
--TTGTACATGGTAGGCTTTTCAT----- mirL 20 167
--TTGTACATGGTAGGCTTTTC----- mirL 19 99
--TGTACATGGTAGGCTTTTCATT----- mirL 21 69

```

```

--TGTACATGGTAGGCTTTCAT----- mirL 20 30
--TGTACATGGTAGGCTTTCATTC----- mirL 22 24
--TTGTACATGGTAGGCTTTCATTCA----- mirL 24 19
--TGTACATGGTAGGCTTTCAT----- mirL 19 19
--TTGTACATGGTAGGCTTT----- mirL 18 18
--GTACATGGTAGGCTTTCATT----- mirL 20 13
--TGTACATGGTAGGCTTTC----- mirL 18 12
--GTACATGGTAGGCTTTCATTC----- mirL 21 8
--GTACATGGTAGGCTTTCAT----- mirL 18 6
----TACATGGTAGGCTTTCATT----- mirL 19 6
--TGTACATGGTAGGCTTTCATTCA----- mirL 23 3
----TACATGGTAGGCTTTCATTTC----- mirL 20 2
----TACATGGTAGGCTTTCATTTCAT----- mirL 22 2
----TACATGGTAGGCTTTCATTCA----- mirL 21 1
CTTGTACATGGTAGGCTTT----- mirL 19 1
--GTACATGGTAGGCTTTCAT----- mirL 19 1
--GTACATGGTAGGCTTTCATTTCATT----- mirL 24 1
CTTGTACATGGTAGGCTTTCAT----- mirL 22 1
CTTGTACATGGTAGGCTTTC----- mirL 20 1
-----ATTTTTGACATTCGGTG----- loop 19 1
-----TGAAGGTCCTACTGTGTGCCA----- mirR 21 16
-----TGAAGGTCCTACTGTGTGCCAGG----- mirR 23 13
-----TGAAGGTCCTACTGTGTGC----- mirR 19 11
-----TGAAGGTCCTACTGTGTGCCAG----- mirR 22 11
-----TGAAGGTCCTACTGTGTGCCAGGC----- mirR 24 5
-----TGAAGGTCCTACTGTGTGCCAGGCC----- mirR 25 4
-----GAAGGTCCTACTGTGTGCCA----- mirR 20 3
-----TGAAGGTCCTACTGTGTGCC----- mirR 20 3
-----GAAGGTCCTACTGTGTGCCAGGCC----- mirR 24 2
-----AGGTCCTACTGTGTGCCA----- mirR 18 2
-----GAAGGTCCTACTGTGTGC----- mirR 18 2
-----AAGGTCCTACTGTGTGCCA----- mirR 19 1
-----AGGTCCTACTGTGTGCCAGG----- mirR 20 1
-----AGGTCCTACTGTGTGCCAGGC----- mirR 21 1
-----AAGGTCCTACTGTGTGCCAGGCCCTGTGC----- mirR 29 1
-----AAGGTCCTACTGTGTGCC----- mirR 18 1
-----GAAGGTCCTACTGTGTGCCAGG----- mirR 22 1

>mmu-mir-879
ACAAGACAAGTTTCTAGGTCCAGAGGCTTATAGCTCTAAGCCTTGGATGAAAGAGGCTTATGGCTTCAAGCTTTCGGAGC species len reads
ACAAGACAAGTTTCTAGGTCC----- morL 21 2
-CAAGACAAGTTTCTAGGT----- morL 18 1
---AGACAAGTTTCTAGGTCCAG----- morL 20 1
-----AGAGGCTTATAGCTCTAAGCC----- mirL 21 118
-----AGAGGCTTATAGCTCTAAGC----- mirL 20 60
-----AGAGGCTTATAGCTCTAAG----- mirL 19 35

```

```

-----AGAGGCTTATAGCTCTAAGCCT----- mirL 22 31
-----AGAGGCTTATAGCTCTAAGCCT----- mirL 23 31
-----AGAGGCTTATAGCTCTAAGCCTTG----- mirL 24 16
-----AGAGGCTTATAGCTCTAA----- mirL 18 14
-----CAGAGGCTTATAGCTCTAAG----- mirL 20 2
-----CCAGAGGCTTATAGCTCTA----- mirL 19 1
-----GGCTTATAGCTCTAAGCCT----- mirL 19 1
-----CCAGAGGCTTATAGCTCT----- mirL 18 1
-----GAGGCTTATAGCTCTAAGCCT----- mirL 21 1
-----TCCAGAGGCTTATAGCTC----- mirL 18 1
-----AGGCTTATAGCTCTAAGCC----- mirL 19 1
-----GGCTTATAGCTCTAAGCC----- mirL 18 1
-----CTTATGGCTTCAAGCTTTCGGA-- mirR 22 378
-----GCTTATGGCTTCAAGCTTTC----- mirR 20 178
-----CTTATGGCTTCAAGCTTTCGG-- mirR 21 174
-----GCTTATGGCTTCAAGCTTTCG-- mirR 21 145
-----CTTATGGCTTCAAGCTTTCGGAGC mirR 24 117
-----GCTTATGGCTTCAAGCTTTCGG-- mirR 22 113
-----CTTATGGCTTCAAGCTTTCGGAG- mirR 23 81
-----GCTTATGGCTTCAAGCTTTC----- mirR 19 66
-----CTTATGGCTTCAAGCTTTC----- mirR 19 36
-----CTTATGGCTTCAAGCTTTCG-- mirR 20 31
-----GCTTATGGCTTCAAGCTTTCGGA-- mirR 23 27
-----CTTATGGCTTCAAGCTTTC----- mirR 18 19
-----GCTTATGGCTTCAAGCTTTC----- mirR 18 15
-----ATGGCTTCAAGCTTTCGG-- mirR 18 9
-----GCTTATGGCTTCAAGCTTTCGGAG- mirR 24 5
-----TATGGCTTCAAGCTTTCGGAG- mirR 21 4
-----TATGGCTTCAAGCTTTCG-- mirR 18 3
-----TATGGCTTCAAGCTTTCGGA-- mirR 20 1
-----GGCTTATGGCTTCAAGCTTTCG-- mirR 22 1
-----TTATGGCTTCAAGCTTTC----- mirR 18 1

>mmu-mir-1957
CCATAACAGCTGGAAAGTAGCTCAGTGGTAGAGCATATGACCAGCATGTGCAAGGCCCTGAGTTTATCCCCAGCACTGCAAAACAAAGCCATGTAGAAAAT species len reads
-----ACAGCTGGAAAGTAGCTC----- morL 18 2
-----CATAACAGCTGGAAAGTA----- morL 18 1
-----ACAGCTGGAAAGTAGCTCAG----- morL 20 1
CCATAACAGCTGGAAAGTA----- morL 19 1
-----TAACAGCTGGAAAGTAGC----- morL 18 1
-----CAGTGGTAGAGCATATGA----- mirL 18 1022
-----CAGTGGTAGAGCATATGAC----- mirL 19 535
-----CAGTGGTAGAGCATATGACC----- mirL 20 61
-----AGTGGTAGAGCATATGAC----- mirL 18 29
-----TCAGTGGTAGAGCATATGA----- mirL 19 14
-----CTCAGTGGTAGAGCATAT----- mirL 18 8

```

```

-----AGTGGTAGAGCATATGACC----- mirL 19 6
-----GTGGTAGAGCATATGACC----- mirL 18 4
-----TCAGTGGTAGAGCATATG----- mirL 18 3
-----GCTCAGTGGTAGAGCATATGACC----- mirL 23 3
-----TCAGTGGTAGAGCATATGAC----- mirL 20 2
-----GCTCAGTGGTAGAGCATA----- mirL 18 1
-----TCCCCAGCACTGCAAAAC----- mirR 18 12
-----CCAGCACTGCAAAACAAA----- mirR 18 4
-----CCCAGCACTGCAAAACAAA----- mirR 19 3
-----TCCCCAGCACTGCAAAACA----- mirR 19 2
-----ATCCCCAGCACTGCAAAA----- mirR 18 1
-----CCCCAGCACTGCAAAACA----- mirR 18 1
-----TATCCCCAGCACTGCAAA----- mirR 18 1
-----CAAAGCCATGTAGAAAAT morR 18 2
-----ACAAAGCCATGTAGAAAA- morR 18 1

```

>mmu-mir-133b

```

TTCAGGCTGCAGTCACCTCCAAAGGGAGTGGCCCCCTGCTCTGGCTGGTCAAACGGAACCAAGTCCGTCTTCTGAGAGGTTTGGTCCCCTTCAACCAGCTACAGCAGGGCTGGCAAAGCTCAA species len re
TTCAGGCTGCAGTCACCT----- morL 18 2
--CAGGCTGCAGTCACCTCC----- morL 18 1
-----CCAAAGGGAGTGGCCCC----- mirL 18 3
-----CAAAGGGAGTGGCCCCCT----- mirL 18 1
-----CCTCCAAAGGGAGTGGCCC----- mirL 19 1
-----TCCAAAGGGAGTGGCCCC----- mirL 18 1
-----AAAGGGAGTGGCCCCCTG----- mirL 18 1
-----CCTCCAAAGGGAGTGGCC----- mirL 18 1
-----CTCCAAAGGGAGTGGCCC----- mirL 18 1
-----TTTGGTCCCCTTCAACCAGCTA----- mirR 22 397
-----TTGGTCCCCTTCAACCAGCTAC----- mirR 22 329
-----TTTGGTCCCCTTCAACCAGCTAC----- mirR 23 323
-----TTGGTCCCCTTCAACCAGCTA----- mirR 21 303
-----GGTCCCCTTCAACCAGCTA----- mirR 19 101
-----TTGGTCCCCTTCAACCAGCTACA----- mirR 23 60
-----TGGTCCCCTTCAACCAGCTA----- mirR 20 49
-----TTTGGTCCCCTTCAACCAGCTACA----- mirR 24 48
-----TGGTCCCCTTCAACCAGCTAC----- mirR 21 39
-----GGTCCCCTTCAACCAGCTAC----- mirR 20 36
-----TGGTCCCCTTCAACCAGCTACA----- mirR 22 9
-----GGTCCCCTTCAACCAGCTACA----- mirR 21 6
-----AGGTTTGGTCCCCTTCAACC----- mirR 20 3
-----TTGGTCCCCTTCAACCAGC----- mirR 19 1
-----TGGTCCCCTTCAACCAGCTACAG----- mirR 23 1
-----AGCAGGGCTGGCAAAGCT--- morR 18 1
-----CAGGGCTGGCAAAGCTCAA morR 19 1

```

>mmu-mir-669e

|                                                                                                 | species | len | reads |
|-------------------------------------------------------------------------------------------------|---------|-----|-------|
| TATATGGGCAGGTGTGTCTTGTGTGTGCATGTTTCATTTGTGTATATGAATATGAATATACACACACTTACACACTCATGCACACACACACATCC | morL    | 18  | 1     |
| TATATGGGCAGGTGTGTG-----TGTCTTGTGTGTGCATGTTTCAT-----                                             | mirL    | 22  | 1049  |
| -----TGTCTTGTGTGTGCATGTTCA-----                                                                 | mirL    | 21  | 292   |
| -----TGTCTTGTGTGTGCATGTTTC-----                                                                 | mirL    | 20  | 114   |
| -----TGTCTTGTGTGTGCATGTTTCATT-----                                                              | mirL    | 23  | 38    |
| -----TGTCTTGTGTGTGCATGTT-----                                                                   | mirL    | 19  | 34    |
| -----TGTCTTGTGTGTGCATGT-----                                                                    | mirL    | 18  | 30    |
| -----GTCTTGTGTGTGCATGTTCA-----                                                                  | mirL    | 20  | 28    |
| -----GTCTTGTGTGTGCATGTTTCAT-----                                                                | mirL    | 21  | 22    |
| -----TGTCTTGTGTGTGCATGTTTCATT-----                                                              | mirL    | 24  | 15    |
| -----GTGTCTTGTGTGTGCATGTTTCAT-----                                                              | mirL    | 23  | 6     |
| -----TCTTGTGTGTGCATGTTTCAT-----                                                                 | mirL    | 20  | 3     |
| -----GTCTTGTGTGTGCATGTTTC-----                                                                  | mirL    | 19  | 3     |
| -----CTTGTGTGTGCATGTTCA-----                                                                    | mirL    | 18  | 2     |
| -----TCTTGTGTGTGCATGTTTCATT-----                                                                | mirL    | 22  | 1     |
| -----GTGTCTTGTGTGTGCATGTT-----                                                                  | mirL    | 20  | 1     |
| -----GTGTCTTGTGTGTGCATG-----                                                                    | mirL    | 18  | 1     |
| -----GTGTCTTGTGTGTGCATGTTCA-----                                                                | mirL    | 22  | 1     |
| -----TCTTGTGTGTGCATGTTTC-----                                                                   | mirL    | 18  | 1     |
| -----CTTGTGTGTGCATGTTTCAT-----                                                                  | mirL    | 19  | 1     |
| -----GTCTTGTGTGTGCATGTT-----                                                                    | mirL    | 18  | 1     |
| -----CACACTCATGCACACACACACAC-----                                                               | mirR    | 23  | 24    |
| -----CACACTCATGCACACACACAC-----                                                                 | mirR    | 21  | 6     |
| -----CACTCATGCACACACACAC-----                                                                   | mirR    | 19  | 5     |
| -----CACACTCATGCACACACACACA-----                                                                | mirR    | 20  | 5     |
| -----ACTCATGCACACACACAC-----                                                                    | mirR    | 18  | 5     |
| -----CACACTCATGCACACACACA-----                                                                  | mirR    | 18  | 4     |
| -----CACTCATGCACACACACACA-----                                                                  | mirR    | 20  | 3     |
| -----ACTCATGCACACACACACAC-----                                                                  | mirR    | 20  | 2     |
| -----CACACTCATGCACACACACACATCC-----                                                             | mirR    | 27  | 2     |
| -----CACACTCATGCACACACACACAT-----                                                               | mirR    | 25  | 2     |
| -----ACACACTCATGCACACACACA-----                                                                 | mirR    | 19  | 1     |
| -----ACACACTCATGCACACACAC-----                                                                  | mirR    | 20  | 1     |
| -----ACACTCATGCACACACACACA-----                                                                 | mirR    | 21  | 1     |
| -----ACACTCATGCACACACACA-----                                                                   | mirR    | 19  | 1     |
| -----TACACACTCATGCACACACA-----                                                                  | mirR    | 20  | 1     |
| -----ACTCATGCACACACACACACA-----                                                                 | mirR    | 19  | 1     |
| -----CACACTCATGCACACACAC-----                                                                   | mirR    | 19  | 1     |
| -----TTACACACTCATGCACACACA-----                                                                 | mirR    | 21  | 1     |
| -----TACACACTCATGCACACAC-----                                                                   | mirR    | 19  | 1     |
| -----ACTCATGCACACACACACAT-----                                                                  | mirR    | 22  | 1     |
| -----ACTCATGCACACACACACACA-----                                                                 | mirR    | 21  | 1     |
| -----ACACTCATGCACACACACAC-----                                                                  | mirR    | 20  | 1     |

>mmu-mir-453



```

GAAGATGCAGGAGTGCTGTGAGAAGTGCCATCCCCTGGTACTTGGAGGGAGGTTGCCTCATAGTGAGCTTGCATTATTTAATGATGCCCAAT species len reads
GAAGATGCAGGAGTGCTG-----mirL 18 1
-----GTGAGAAGTGCCATCCCC-----mirL 18 1
-----CTGTGAGAAGTGCCATCC-----mirL 18 1
-----TGAGAAGTGCCATCCCCT-----mirL 18 1
-----TGTGAGAAGTGCCATCCC-----mirL 18 1
-----CCCTGGTACTTGGAGGGAG-----loop 19 1
-----CTGGTACTTGGAGGGAG-----loop 18 1
-----AGGTTGCCTCATAGTGAGCTTGCA-----mirR 24 919
-----AGGTTGCCTCATAGTGAGCTTGC-----mirR 23 330
-----AGGTTGCCTCATAGTGAGCTTGCAT-----mirR 25 86
-----AGGTTGCCTCATAGTGAGCTT-----mirR 21 74
-----GTTGCCTCATAGTGAGCTTGCA-----mirR 22 68
-----TTGCCTCATAGTGAGCTTGCA-----mirR 21 55
-----AGGTTGCCTCATAGTGAGCTTG-----mirR 22 44
-----GGTTGCCTCATAGTGAGCTTGCA-----mirR 23 40
-----GTTGCCTCATAGTGAGCTTG-----mirR 20 13
-----GTTGCCTCATAGTGAGCTTGC-----mirR 21 11
-----AGGTTGCCTCATAGTGAGCT-----mirR 20 11
-----GGTTGCCTCATAGTGAGCTTGC-----mirR 22 11
-----TTGCCTCATAGTGAGCTTGC-----mirR 20 10
-----GGTTGCCTCATAGTGAGCTTG-----mirR 21 9
-----AGGTTGCCTCATAGTGAGCTTGCATT-----mirR 26 7
-----GGTTGCCTCATAGTGAGCTT-----mirR 20 4
-----GGTTGCCTCATAGTGAGCTTGCAT-----mirR 24 3
-----GGTTGCCTCATAGTGAGCT-----mirR 19 2
-----GTTGCCTCATAGTGAGCTTGCAT-----mirR 23 1
-----GAGGTTGCCTCATAGTGAGCTTGCA-----mirR 25 1
-----GTTGCCTCATAGTGAGCTT-----mirR 19 1
-----TTGCCTCATAGTGAGCTTG-----mirR 19 1
-----GTTGCCTCATAGTGAGCT-----mirR 18 1
-----TATTTAATGATGCCCAAT morR 18 1

```

>mmu-mir-1941

```

GAAAGCCAGCAGGGTGGGAGGGAGATGCTGGTACAGAGGCTTGGGGTTTGGAGGCATCTTAGCAGTATCTCCCATCCACCCACCTGGGCAGAAGT species len reads
--AAGCCAGCAGGGTGGGAG-----morL 18 2
GAAAGCCAGCAGGGTGGG-----morL 18 1
-----AGGGAGATGCTGGTACAGAGGCTT-----mirL 24 146
-----AGGGAGATGCTGGTACAGAGGCTTG-----mirL 25 39
-----AGGGAGATGCTGGTACAGAGGCT-----mirL 23 36
-----AGGGAGATGCTGGTACAGAGGCTTGG-----mirL 26 11
-----AGGGAGATGCTGGTACAGAGGC-----mirL 22 11
-----GAGATGCTGGTACAGAGGCTT-----mirL 21 3
-----AGGGAGATGCTGGTACAGAG-----mirL 20 2
-----GAGATGCTGGTACAGAGGCTTG-----mirL 22 2
-----AGGGAGATGCTGGTACAGAGGCTTGGG-----mirL 27 2

```

```

-----GAGGGAGATGCTGGTACAGAGGCT----- mirL 24 1
-----GGAGATGCTGGTACAGAGGCTTG----- mirL 23 1
-----GAGGGAGATGCTGGTACAGAG----- mirL 21 1
-----GAGATGCTGGTACAGAGGCT----- mirL 20 1
-----GGAGATGCTGGTACAGAGGCT----- mirL 21 1
-----GGGAGATGCTGGTACAGAGGCTT----- mirL 23 1
-----CATCTTAGCAGTATCTCCCAT----- mirR 21 735
-----CATCTTAGCAGTATCTCCCA----- mirR 20 296
-----CATCTTAGCAGTATCTCCCATC----- mirR 22 139
-----CATCTTAGCAGTATCTCC----- mirR 18 57
-----CATCTTAGCAGTATCTCCCATCC----- mirR 23 47
-----CATCTTAGCAGTATCTCCC----- mirR 19 37
-----ATCTTAGCAGTATCTCCCATCC----- mirR 22 18
-----ATCTTAGCAGTATCTCCCAT----- mirR 20 8
-----CTTAGCAGTATCTCCCAT----- mirR 18 7
-----TCTTAGCAGTATCTCCCA----- mirR 18 6
-----TCTTAGCAGTATCTCCCAT----- mirR 19 5
-----CATCTTAGCAGTATCTCCCATCCA----- mirR 24 5
-----CTTAGCAGTATCTCCCATC----- mirR 19 4
-----ATCTTAGCAGTATCTCCCA----- mirR 19 4
-----ATCTTAGCAGTATCTCCCATCCA----- mirR 23 3
-----ATCTTAGCAGTATCTCCCATC----- mirR 21 2
-----TCTTAGCAGTATCTCCCATCC----- mirR 21 1
-----GCATCTTAGCAGTATCTCCCA----- mirR 21 1
-----CTTAGCAGTATCTCCCATCC----- mirR 20 1
-----GCATCTTAGCAGTATCTCCCAT----- mirR 22 1
-----TCTTAGCAGTATCTCCCATC----- mirR 20 1
-----ACCCACCTGGGCAGAAGT morR 18 1

```

>mmu-mir-875

```

TTCCCAGTTCTGTGGTACTATACCTCAGTTTTATCAGGTGTTTCATTAATAACCTGAAAATACTGAGGCTATGTT species len reads
TTCCCAGTTCTGTGGTACT----- morL 18 2
-TCCCAGTTCTGTGGTACT----- morL 18 1
-----TATACCTCAGTTTTATCAGGTG----- mirL 22 45
-----TATACCTCAGTTTTATCA----- mirL 18 40
-----TATACCTCAGTTTTATCAGGTGT----- mirL 23 25
-----TATACCTCAGTTTTATCAG----- mirL 19 24
-----ACCTCAGTTTTATCAGGTG----- mirL 19 24
-----TATACCTCAGTTTTATCAGGT----- mirL 21 12
-----ATACCTCAGTTTTATCAGGTG----- mirL 21 10
-----ACCTCAGTTTTATCAGGTGT----- mirL 20 10
-----TACCTCAGTTTTATCAGGTG----- mirL 20 8
-----ATACCTCAGTTTTATCAG----- mirL 18 4
-----TACCTCAGTTTTATCAGGTGT----- mirL 21 3
-----TACTATACCTCAGTTTTA----- mirL 18 2
-----ATACCTCAGTTTTATCAGGTGT----- mirL 22 2

```

```

-----ATACCTCAGTTTTATCAGGT----- mirL 20 2
-----ACCTCAGTTTTATCAGGT----- mirL 18 2
-----TATACCTCAGTTTTATCAGGTGTTT----- mirL 25 1
-----ATACCTCAGTTTTATCAGGTGTTT----- mirL 24 1
-----TATACCTCAGTTTTATCAGG----- mirL 20 1
-----TACCTCAGTTTTATCAGGTGTT----- mirL 22 1
-----ACTATACCTCAGTTTTAT----- mirL 18 1
-----CCTGAAAATACTGAGGCTATG-- mirR 21 754
-----CCTGAAAATACTGAGGCTAT-- mirR 20 302
-----CCTGAAAATACTGAGGCTA--- mirR 19 100
-----CCTGAAAATACTGAGGCT---- mirR 18 58
-----CCTGAAAATACTGAGGCTATGT- mirR 22 40
-----GAAAATACTGAGGCTATG-- mirR 18 39
-----CTGAAAATACTGAGGCTATG-- mirR 20 30
-----TGAAAATACTGAGGCTATG-- mirR 19 22
-----TGAAAATACTGAGGCTAT-- mirR 18 14
-----CTGAAAATACTGAGGCTAT-- mirR 19 12
-----GAAAATACTGAGGCTATGT- mirR 19 3
-----CTGAAAATACTGAGGCTA--- mirR 18 2
-----TCACCTGAAAATACTGAGG----- mirR 19 1
-----TGAAAATACTGAGGCTATGT- mirR 20 1
-----CCTGAAAATACTGAGGCTATGTT mirR 23 1
-----CTGAAAATACTGAGGCTATGT- mirR 21 1

```

>mmu-mir-344c

```

TCTTCTGCAAGGGTTTTTTTCAGTCAGGCTGCTGGCTAGAGTACAGCTATCAGCTGGTACCTGATCTAGTCAAAGCCTGACAGTAAACTGCTCCAGAGAGGAAGA species len reads
-CCTTCTGCAAGGGTTTTTT----- morL 18 3
TCTTCTGCAAGGGTTTTTT----- morL 18 1
TCTTCTGCAAGGGTTTTTT----- morL 19 1
-CCTTCTGCAAGGGTTTTTT----- morL 19 1
---TCTGCAAGGGTTTTTTTCA----- morL 19 1
--TTCTGCAAGGGTTTTTT----- morL 18 1
-----AGTCAGGCTGCTGGCTAGAGTAC----- mirL 23 7
-----CAGGCTGCTGGCTAGAGTA----- mirL 19 1
-----TTCAGTCAGGCTGCTGGCTA----- mirL 20 1
-----CAGCTATCAGCTGGTACC----- loop 18 1
-----CTATCAGCTGGTACCTGA----- loop 18 1
-----TGATCTAGTCAAAGCCTGACAGT----- mirR 23 702
-----GATCTAGTCAAAGCCTGACAGT----- mirR 22 313
-----TGATCTAGTCAAAGCCTGAC----- mirR 20 105
-----TGATCTAGTCAAAGCCTGACA----- mirR 21 80
-----TGATCTAGTCAAAGCCTGACAGTA----- mirR 24 66
-----TGATCTAGTCAAAGCCTGACAG----- mirR 22 64
-----GATCTAGTCAAAGCCTGAC----- mirR 19 40
-----GATCTAGTCAAAGCCTGACAGTA----- mirR 23 40
-----TGATCTAGTCAAAGCCTGACAGTAA----- mirR 25 33

```

```

-----TGATCTAGTCAAAGCCTGA----- mirR 19 31
-----GATCTAGTCAAAGCCTGACA----- mirR 20 21
-----GATCTAGTCAAAGCCTGACAG----- mirR 21 16
-----GATCTAGTCAAAGCCTGACAGTAA----- mirR 24 8
-----GATCTAGTCAAAGCCTGA----- mirR 18 5
-----ATCTAGTCAAAGCCTGACAGT----- mirR 21 2
-----ATCTAGTCAAAGCCTGAC----- mirR 18 1
-----CCTGATCTAGTCAAAGCCTGACAG----- mirR 24 1
-----ATCTAGTCAAAGCCTGACAG----- mirR 20 1
-----CCTGATCTAGTCAAAGCC----- mirR 18 1
-----AAACTGCTCCAGAGAGGA--- morR 18 2
-----TAAACTGCTCCAGAGAGG--- morR 18 2
-----TAAACTGCTCCAGAGAGGAAG- morR 21 1
-----TAAACTGCTCCAGAGAGGA--- morR 19 1
-----CTGCTCCAGAGAGGAAGA morR 18 1

```

>mmu-mir-692-1

```

AGGGCCACAACCAGCGCAGACTGGCGCGCCCCAGGGATCTCTGGGTGAGTATCTCTTTGAGCGCCTCACTCTCAAGCACAACTAGGAGGCCTC species len reads
AGGGCCACAACCAGCGCA----- morL 18 1
-----GCAGACTGGCGCGCCCCA----- mirL 18 2
-----AGCGCAGACTGGCGCGCC----- mirL 18 1
-----GGATCTCTGGGTGAGTATC----- loop 19 1
-----ATCTCTTTGAGCGCCTCACTC----- mirR 21 781
-----ATCTCTTTGAGCGCCTCACT----- mirR 20 391
-----ATCTCTTTGAGCGCCTCACTCT----- mirR 22 193
-----ATCTCTTTGAGCGCCTCAC----- mirR 19 63
-----ATCTCTTTGAGCGCCTCA----- mirR 18 41
-----TCTCTTTGAGCGCCTCACTC----- mirR 20 12
-----CTCTTTGAGCGCCTCACTC----- mirR 19 11
-----TCTTTGAGCGCCTCACTC----- mirR 18 8
-----ATCTCTTTGAGCGCCTCACTCTCAA----- mirR 25 6
-----ATCTCTTTGAGCGCCTCACTCTC----- mirR 23 6
-----CTCTTTGAGCGCCTCACT----- mirR 18 5
-----TCTCTTTGAGCGCCTCACT----- mirR 19 5
-----TCTCTTTGAGCGCCTCACTCT----- mirR 21 3
-----TCTTTGAGCGCCTCACTCT----- mirR 19 2
-----CTCTTTGAGCGCCTCACTCT----- mirR 20 2
-----TATCTCTTTGAGCGCCTCACT----- mirR 21 1
-----TCTCTTTGAGCGCCTCAC----- mirR 18 1
-----TATCTCTTTGAGCGCCTCACTC----- mirR 22 1
-----CTCTTTGAGCGCCTCACTCTCA----- mirR 22 1
-----CTCTCAAGCACAACTAGGAGGCCTC morR 25 1
-----AGCACAACTAGGAGGCCTC morR 19 1

```

>mmu-mir-692-2

```

AGGGCCACAACCAGCGCAGACTGGCGCGCCCCAGGGATCTCTGGGCGAGTATCTCTTTGAGCGCCTCACTCTCAAGCACGACTAGGAGGCCTC species len reads

```

```

AGGGCCACAACCAGCGCA----- morL 18 1
-----GCAGACTGGCGCGCCCA----- mirL 18 2
-----AGCGCAGACTGGCGCGCC----- mirL 18 1
-----ATCTCTTTGAGCGCCTCACTC----- mirR 21 781
-----ATCTCTTTGAGCGCCTCACT----- mirR 20 391
-----ATCTCTTTGAGCGCCTCACTCT----- mirR 22 193
-----ATCTCTTTGAGCGCCTCAC----- mirR 19 63
-----ATCTCTTTGAGCGCCTCA----- mirR 18 41
-----TCTCTTTGAGCGCCTCACTC----- mirR 20 12
-----CTCTTTGAGCGCCTCACTC----- mirR 19 11
-----TCTTTGAGCGCCTCACTC----- mirR 18 8
-----ATCTCTTTGAGCGCCTCACTCTC----- mirR 23 6
-----ATCTCTTTGAGCGCCTCACTCTCAA----- mirR 25 6
-----TCTCTTTGAGCGCCTCACT----- mirR 19 5
-----CTCTTTGAGCGCCTCACT----- mirR 18 5
-----TCTCTTTGAGCGCCTCACTCT----- mirR 21 3
-----CTCTTTGAGCGCCTCACTCT----- mirR 20 2
-----TCTTTGAGCGCCTCACTCT----- mirR 19 2
-----TATCTCTTTGAGCGCCTCACT----- mirR 21 1
-----TATCTCTTTGAGCGCCTCACTC----- mirR 22 1
-----CTCTTTGAGCGCCTCACTCTCA----- mirR 22 1
-----TCTCTTTGAGCGCCTCAC----- mirR 18 1
-----AGCACGACTAGGAGGCCTC morR 19 1
-----CTCAAGCACGACTAGGAGGC--- morR 20 1
-----TCTCAAGCACGACTAGGA----- morR 18 1

```

>mmu-mir-1958

```

CCTAGAAGAGAACTTACTGCTTCCACTTTCTATAGTTAATTTCTAACTGCATCTATAGGAAAGTGAAGCAGTAAGTTCTTCTTAGGTTCCGTGA species len reads
CCTAGAAGAGAACTTACT----- mirL 18 3
---AGAAGAGAACTTACTGCTTC----- mirL 20 1
-----TAGGAAAGTGAAGCAGTAAG----- mirR 21 655
-----TAGGAAAGTGAAGCAGTAA----- mirR 20 350
-----TAGGAAAGTGAAGCAGTAAGT----- mirR 22 177
-----TAGGAAAGTGAAGCAGTA----- mirR 19 58
-----AGGAAAGTGAAGCAGTAAG----- mirR 20 56
-----TAGGAAAGTGAAGCAGT----- mirR 18 36
-----AGGAAAGTGAAGCAGTAA----- mirR 19 30
-----AGGAAAGTGAAGCAGTAAGT----- mirR 21 19
-----TAGGAAAGTGAAGCAGTAAGTT----- mirR 23 18
-----GGAAAGTGAAGCAGTAAG----- mirR 19 17
-----GAAAGTGAAGCAGTAAG----- mirR 18 17
-----GGAAAGTGAAGCAGTAA----- mirR 18 15
-----AGGAAAGTGAAGCAGTA----- mirR 18 10
-----TAGGAAAGTGAAGCAGTAAGTTCT----- mirR 25 6
-----GAAAGTGAAGCAGTAAGT----- mirR 19 5
-----AGGAAAGTGAAGCAGTAAGTTCT----- mirR 25 4

```

```

-----ATAGGAAAGTGAAGCAGTAAG----- mirR 22 4
-----GGAAAGTGAAGCAGTAAGT----- mirR 20 4
-----AGGAAAGTGAAGCAGTAAGTT----- mirR 22 2
-----GAAAGTGAAGCAGTAAGTT----- mirR 20 1
-----GAAAGTGAAGCAGTAAGTTCT----- mirR 22 1
-----GGAAAGTGAAGCAGTAAGTT----- mirR 21 1
-----AGGAAAGTGAAGCAGTAAGTTCTCTTC----- mirR 28 1
-----ATAGGAAAGTGAAGCAGTAA----- mirR 21 1
-----AAGTTCTCTTCTAGGTTCC----- morR 19 1
-----CTCTTCTAGGTTCCGTGA morR 18 1

```

>mmu-mir-1944

| Species | len | reads |
|---------|-----|-------|
| morL    | 20  | 1     |
| mirL    | 23  | 126   |
| mirL    | 22  | 121   |
| mirL    | 21  | 104   |
| mirL    | 20  | 75    |
| mirL    | 24  | 47    |
| mirL    | 19  | 47    |
| mirL    | 23  | 46    |
| mirL    | 22  | 44    |
| mirL    | 18  | 36    |
| mirL    | 24  | 31    |
| mirL    | 21  | 14    |
| mirL    | 25  | 13    |
| mirL    | 18  | 11    |
| mirL    | 19  | 10    |
| mirL    | 18  | 1     |
| mirL    | 19  | 1     |
| mirR    | 27  | 195   |
| mirR    | 26  | 156   |
| mirR    | 25  | 139   |
| mirR    | 28  | 114   |
| mirR    | 24  | 35    |
| mirR    | 18  | 23    |
| mirR    | 23  | 14    |
| mirR    | 29  | 13    |
| mirR    | 25  | 10    |
| mirR    | 24  | 7     |
| mirR    | 25  | 7     |
| mirR    | 24  | 6     |
| mirR    | 22  | 5     |
| mirR    | 26  | 4     |
| mirR    | 25  | 3     |
| mirR    | 19  | 2     |

```

-----TGTGCTGAATGTCAAGTT----- mirR 18 2
-----TCTGTGCTGAATGTCAAGTTCTGA----- mirR 24 2
-----CTGTGCTGAATGTCAAGTTCTGA----- mirR 23 2
-----TCTGTGCTGAATGTCAAGTTCTGATT----- mirR 26 2
-----CTGTGCTGAATGTCAAGTTCTG----- mirR 22 2
-----TCTGTGCTGAATGTCAAGTTCTG----- mirR 23 2
-----TGTGCTGAATGTCAAGTTCTGATTGG----- mirR 27 1
-----TCTGTGCTGAATGTCAAGTT----- mirR 20 1
-----TCTGTGCTGAATGTCAAGTTCTGATTGGC----- mirR 30 1
-----CTGTGCTGAATGTCAAGTTCTGATTGGC----- mirR 29 1
-----CTGTGCTGAATGTCAAGT----- mirR 18 1
-----TCTGTGCTGAATGTCAAG----- mirR 18 1
-----GCTTTAGGAGGGAGTGTTT morR 19 1

```

>mmu-mir-499

```

GTTAAGACTTGCAGTGATGTTAGCTCCTCTGCATGTGAACATCACAGCAAGTCTGTGCTGCTGCCTGCCCCATGCTGC species len reads
-TTAAGACTTGCAGTGATGTTA----- mirL 22 211
-TTAAGACTTGCAGTGATGTT----- mirL 21 210
-TTAAGACTTGCAGTGATGTTAG----- mirL 23 117
-TTAAGACTTGCAGTGATG----- mirL 18 79
-TTAAGACTTGCAGTGATGT----- mirL 19 65
-TTAAGACTTGCAGTGATGTT----- mirL 20 62
--TAAGACTTGCAGTGATGTTA----- mirL 21 29
--TAAGACTTGCAGTGATGTT----- mirL 20 20
--TAAGACTTGCAGTGATGT----- mirL 18 12
-TTAAGACTTGCAGTGATGTTAGC----- mirL 24 9
---AGACTTGCAGTGATGTTAG----- mirL 20 9
--TAAGACTTGCAGTGATGT----- mirL 19 9
--TAAGACTTGCAGTGATGTTAG----- mirL 22 8
---AGACTTGCAGTGATGTT----- mirL 18 8
---AGACTTGCAGTGATGTTA----- mirL 19 7
---AAGACTTGCAGTGATGTT----- mirL 19 7
---AAGACTTGCAGTGATGTTAG----- mirL 21 4
---AAGACTTGCAGTGATGTT----- mirL 18 4
---AAGACTTGCAGTGATGTTA----- mirL 20 4
GTTAAGACTTGCAGTGAT----- mirL 18 1
--TAAGACTTGCAGTGATGTTAGC----- mirL 23 1
---AAGACTTGCAGTGATGTTAGC----- mirL 22 1
-----AACATCACAGCAAGTCTGTGCT----- mirR 22 371
-----AACATCACAGCAAGTCTG----- mirR 18 68
-----AACATCACAGCAAGTCTGTGCT----- mirR 21 47
-----AACATCACAGCAAGTCTGTGCTG----- mirR 23 41
-----ACATCACAGCAAGTCTGTGCT----- mirR 21 22
-----AACATCACAGCAAGTCTGT----- mirR 19 11
-----AACATCACAGCAAGTCTGTG----- mirR 20 8
-----GAACATCACAGCAAGTCTGTGCT----- mirR 23 5

```

```

-----ATCACAGCAAGTCTGTGCT----- mirR 19 4
-----ACATCACAGCAAGTCTGTGCTG----- mirR 22 4
-----ATCACAGCAAGTCTGTGCTG----- mirR 20 3
-----AACATCACAGCAAGTCTGTGCTGC----- mirR 24 3
-----ACATCACAGCAAGTCTGTGCT----- mirR 20 2
-----CATCACAGCAAGTCTGTGCT----- mirR 20 2
-----CATCACAGCAAGTCTGTGCTG----- mirR 21 2
-----GAACATCACAGCAAGTCTGTGCT----- mirR 22 2
-----TGAACATCACAGCAAGTC----- mirR 18 1
-----ACATCACAGCAAGTCTGT----- mirR 18 1
-----GCTGCTGCCTGCCCCAT----- morR 18 1
-----CTGCCTGCCCCATGCTGC morR 19 1

```

>mmu-mir-882

| Species | len | reads |
|---------|-----|-------|
| morL    | 18  | 8     |
| morL    | 19  | 1     |
| mirL    | 20  | 730   |
| mirL    | 19  | 247   |
| mirL    | 21  | 194   |
| mirL    | 22  | 106   |
| mirL    | 18  | 76    |
| mirL    | 19  | 31    |
| mirL    | 18  | 18    |
| mirL    | 20  | 10    |
| mirL    | 18  | 10    |
| mirL    | 21  | 6     |
| mirL    | 23  | 5     |
| mirL    | 19  | 5     |
| mirL    | 19  | 4     |
| mirL    | 18  | 3     |
| mirL    | 21  | 2     |
| mirL    | 25  | 1     |
| mirL    | 20  | 1     |
| mirL    | 22  | 1     |
| mirL    | 20  | 1     |
| loop    | 18  | 2     |
| mirR    | 18  | 4     |
| mirR    | 18  | 2     |
| mirR    | 18  | 1     |
| mirR    | 19  | 1     |
| mirR    | 19  | 1     |
| mirR    | 19  | 1     |
| mirR    | 18  | 1     |
| morR    | 18  | 1     |

>mmu-mir-693



C:\Documents and Settings\hong\Desktop\Hippocampus-total RNA.txt

```
ACAGCCACATCCGAAAGTTTTCCTGGCTAGGGCAGCTTTCAGATGTGGCTGTAATGAGCATGCTCCCAGC species len reads
-CAGCCACATCCGAAAGTTTTC----- mirL 21 727
-CAGCCACATCCGAAAGTTT----- mirL 20 168
-CAGCCACATCCGAAAGTTTTC----- mirL 22 52
-CAGCCACATCCGAAAGTTT----- mirL 19 45
-CAGCCACATCCGAAAGTT----- mirL 18 22
--AGCCACATCCGAAAGTTTTC----- mirL 20 22
-CAGCCACATCCGAAAGTTTTCCTGGC----- mirL 26 7
-CAGCCACATCCGAAAGTTTTCCTGG----- mirL 25 6
---GCCACATCCGAAAGTTTTC----- mirL 19 6
---GCCACATCCGAAAGTTT----- mirL 18 3
ACAGCCACATCCGAAAGTTTTC----- mirL 22 3
--AGCCACATCCGAAAGTTT----- mirL 19 3
--AGCCACATCCGAAAGTTTTC----- mirL 21 2
---CCACATCCGAAAGTTTTC----- mirL 18 2
---CCACATCCGAAAGTTTTC----- mirL 19 2
--AGCCACATCCGAAAGTTT----- mirL 18 2
--AGCCACATCCGAAAGTTTTCCT----- mirL 22 1
--AGCCACATCCGAAAGTTTTCCTGG----- mirL 24 1
-----GCAGCTTTCAGATGTGGCTGTAA----- mirR 23 178
-----AGCTTTCAGATGTGGCTGTAA----- mirR 21 57
-----GCTTTCAGATGTGGCTGTAA----- mirR 20 54
-----GCAGCTTTCAGATGTGGCTGTA----- mirR 22 19
-----GCAGCTTTCAGATGTGGCTGTAAT----- mirR 24 13
-----CAGCTTTCAGATGTGGCTGTAA----- mirR 22 11
-----GCAGCTTTCAGATGTGGCTGT----- mirR 21 10
-----GCAGCTTTCAGATGTGGCT----- mirR 19 7
-----GCAGCTTTCAGATGTGGCTG----- mirR 20 7
-----AGCTTTCAGATGTGGCTGTAAT----- mirR 22 4
-----AGCTTTCAGATGTGGCTGTA----- mirR 20 3
-----GGCAGCTTTCAGATGTGGCTGTAA----- mirR 24 3
-----GCAGCTTTCAGATGTGGCTGTAATG----- mirR 25 3
-----GCTTTCAGATGTGGCTGTAAT----- mirR 21 3
-----GGGCAGCTTTCAGATGTGGCTGTAA----- mirR 25 2
-----AGCTTTCAGATGTGGCTGT----- mirR 19 2
-----AGCTTTCAGATGTGGCTG----- mirR 18 2
-----CAGCTTTCAGATGTGGCTGTA----- mirR 21 1
-----AGCTTTCAGATGTGGCTGTAATG----- mirR 23 1
-----AGCTTTCAGATGTGGCTGTAATGAGC----- mirR 26 1
-----GGCAGCTTTCAGATGTGGCTGTAAT----- mirR 25 1
-----GCTTTCAGATGTGGCTGT----- mirR 18 1
-----GCTTTCAGATGTGGCTGTA----- mirR 19 1
-----GCTTTCAGATGTGGCTGTA----- mirR 19 1
-----TAATGAGCATGCTCCCAGC morR 19 1
```

>mmu-mir-1896

```
GTCCGAGGTCAAGCTGAAGGCTTCCACACTCATTACAGTGATGTCTTTTGGAAACGACCATGGACTCTCTGATGGTGGGTGAGGAGGGCCCGACTAAAGGTTT species len reads
```

```

-----GAGGTCAAGCTGAAGGCTTT----- morL 20 2
-----GAGGTCAAGCTGAAGGCTT----- morL 19 1
GTCGGAGGTCAAGCTGAA----- morL 18 1
-----TTTCCCACACTCATTACA----- mirL 18 1
-----CCCACACTCATTACAGTG----- mirL 18 1
-----CTCTCTGATGGTGGGTGAGGAG----- mirR 22 652
-----CTCTCTGATGGTGGGTGAGGAGG----- mirR 23 234
-----CTCTCTGATGGTGGGTGAGGA----- mirR 21 195
-----CTCTCTGATGGTGGGTGAG----- mirR 19 85
-----CTCTCTGATGGTGGGTGA----- mirR 18 71
-----CTCTCTGATGGTGGGTGAGG----- mirR 20 53
-----CTCTCTGATGGTGGGTGAGGAGGA----- mirR 24 41
-----TCTCTGATGGTGGGTGAGGAG----- mirR 21 24
-----TCTGATGGTGGGTGAGGAG----- mirR 19 22
-----CTCTGATGGTGGGTGAGGAG----- mirR 20 20
-----CTCTGATGGTGGGTGAGGAGG----- mirR 21 11
-----TCTCTGATGGTGGGTGAGGA----- mirR 20 8
-----TCTGATGGTGGGTGAGGAGG----- mirR 20 7
-----TCTCTGATGGTGGGTGAGGAGG----- mirR 22 6
-----CTCTGATGGTGGGTGAGGA----- mirR 19 3
-----CTCTGATGGTGGGTGAGG----- mirR 18 3
-----TCTCTGATGGTGGGTGAG----- mirR 18 1
-----TCTGATGGTGGGTGAGGAGGA----- mirR 21 1
-----ACTCTCTGATGGTGGGTGAGGAG----- mirR 23 1
-----ACTCTCTGATGGTGGGTGAG----- mirR 20 1
-----TCTCTGATGGTGGGTGAGG----- mirR 19 1
-----TCTGATGGTGGGTGAGGA----- mirR 18 1
-----CTCTGATGGTGGGTGAGGAGGA----- mirR 22 1
-----GAGGGCCCGACTAAAGGTTT morR 20 1

```

>mmu-mir-1197

```

CTCAAGGTATTTGAAGATGCGGTTGACCATGGTGTGTACGCTTTATTTATGACGTAGGACACATGGTCTACTTCTTCTCAATATCACATC species len reads
CTCAAGGTATTTGAAGAT----- morL 18 2
-TCAAGGTATTTGAAGATGCGG----- morL 21 1
--CAAGGTATTTGAAGATGCGG----- morL 20 1
--CAAGGTATTTGAAGATGCG----- morL 19 1
-----CGGTTGACCATGGTGTGTAC----- mirL 20 3
-----CGGTTGACCATGGTGTGT----- mirL 18 1
-----CGGTTGACCATGGTGTGTACGC----- mirL 22 1
-----TAGGACACATGGTCTACTTCT----- mirR 21 980
-----AGGACACATGGTCTACTTCT----- mirR 20 159
-----TAGGACACATGGTCTACTTCT----- mirR 20 119
-----TAGGACACATGGTCTACTT----- mirR 19 50
-----AGGACACATGGTCTACTTCT----- mirR 19 31
-----TAGGACACATGGTCTACTTCTT----- mirR 22 20
-----GACACATGGTCTACTTCT----- mirR 18 14

```

C:\Documents and Settings\hong\Desktop\Hippocampus-total RNA.txt

```
-----TAGGACACATGGTCTACTTCTTC----- mirR 23 13
-----AGGACACATGGTCTACTTCTT----- mirR 21 10
-----AGGACACATGGTCTACTT----- mirR 18 10
-----TAGGACACATGGTCTACT----- mirR 18 10
-----GGACACATGGTCTACTTCT----- mirR 19 5
-----TAGGACACATGGTCTACTTCTTCTC----- mirR 25 2
-----GACACATGGTCTACTTCTT----- mirR 19 1
-----GTAGGACACATGGTCTACTTCT----- mirR 22 1
-----CGTAGGACACATGGTCTACTT----- mirR 21 1
-----AGGACACATGGTCTACTTCTTCTC----- mirR 24 1
-----ACGTAGGACACATGGTCT----- mirR 18 1
-----AGGACACATGGTCTACTTCTTC----- mirR 22 1
-----TCTTCTCAATATCACATC morR 18 1
```

>mmu-mir-1939

```
TCAAGTCAAGGGGGACCCCTTCGATTCCTGCCAATGCACATAAATGTAATGGTCTGGAAAATCTCTGAAGGAAGGCCTCAGACTTGGTATGCAAACCAAAGGATGTTTATCTGAAAAACACAA species len r
--AAGTCAAGGGGGACCCCT----- morL 18 1
--CAAGTCAAGGGGGACCC----- morL 18 1
TCAAGTCAAGGGGGACCC----- morL 18 1
-----TCGATTCCTGCCAATGCAC----- mirL 20 806
-----TCGATTCCTGCCAATGCA----- mirL 19 196
-----TCGATTCCTGCCAATGC----- mirL 18 126
-----TCGATTCCTGCCAATGCACT----- mirL 21 102
-----CGATTCCTGCCAATGCAC----- mirL 19 90
-----TCGATTCCTGCCAATGCACATA----- mirL 22 30
-----GATTCCTGCCAATGCAC----- mirL 18 28
-----CGATTCCTGCCAATGCA----- mirL 18 21
-----CGATTCCTGCCAATGCACT----- mirL 20 12
-----TTCGATTCCTGCCAATGCACT----- mirL 22 4
-----TTCGATTCCTGCCAATG----- mirL 18 2
-----TTCGATTCCTGCCAATGCAC----- mirL 21 2
-----TTCGATTCCTGCCAATGCA----- mirL 20 2
-----CCTTCGATTCCTGCCAA----- mirL 18 1
-----ATTCCCTGCCAATGCACT----- mirL 18 1
-----TTCGATTCCTGCCAATGCACATA----- mirL 23 1
-----ATTCCCTGCCAATGCACATA----- mirL 19 1
-----GATTCCTGCCAATGCACT----- mirL 19 1
-----CGATTCCTGCCAATGCACATA----- mirL 21 1
-----CAAACCAAAGGATGTTA----- mirR 19 2
-----CAAACCAAAGGATGTT----- mirR 18 1
-----AAACCAAAGGATGTTAT----- mirR 18 1
-----TTATTCTGAAAAACACAA morR 18 2
```

>mmu-mir-194-1

```
AACTGATGGAGTCATCGGGTGAACAGCAACTCCATGTGGACTGTGCTCGGATTCAGTGGAGCTGCTGTTACTTCTGATGGCCTCCAACCGGCTACAAACATGGAAAAGGAAGGGCAG species len reads
--CTGATGGAGTCATCGGGT----- morL 18 2
```

```

- ACTGATGGAGTCATCGGG----- morL 18 2
AACTGATGGAGTCATCGGG----- morL 19 1
-----TGTAACAGCAACTCCATGTGG----- mirL 21 433
-----TGTAACAGCAACTCCATGTGGAC----- mirL 23 389
-----TGTAACAGCAACTCCATGTGGA----- mirL 22 241
-----TGTAACAGCAACTCCATGTG----- mirL 20 117
-----TGTAACAGCAACTCCATGT----- mirL 19 77
-----TGTAACAGCAACTCCATG----- mirL 18 63
-----TGTAACAGCAACTCCATGTGGACTG----- mirL 25 25
-----GTAACAGCAACTCCATGTGG----- mirL 20 15
-----GTAACAGCAACTCCATGT----- mirL 18 14
-----AACAGCAACTCCATGTGG----- mirL 18 10
-----GTAACAGCAACTCCATGTGGAC----- mirL 22 9
-----GTAACAGCAACTCCATGTGGA----- mirL 21 9
-----AACAGCAACTCCATGTGGA----- mirL 19 4
-----TAACAGCAACTCCATGTGG----- mirL 19 2
-----TAACAGCAACTCCATGTGGAC----- mirL 21 2
-----AACAGCAACTCCATGTGGAC----- mirL 20 2
-----GTAACAGCAACTCCATGTG----- mirL 19 1
-----TAACAGCAACTCCATGTG----- mirL 18 1
-----GGCCTCCAACCGGCTACA----- mirR 18 2
-----CTCCAACCGGCTACAAAC----- mirR 18 2
-----GCCTCCAACCGGCTACAA----- mirR 18 2
-----GATGGCCTCCAACCGGCT----- mirR 18 1
-----GCCTCCAACCGGCTACAAA----- mirR 19 1
-----CCTCCAACCGGCTACAAA----- mirR 18 1
-----CCTCCAACCGGCTACAAACA----- mirR 20 1
-----ATGGAAAAGGAAGGGCAG morR 18 1
-----AAACATGGAAAAGGAAGG---- morR 18 1
-----ACAAACATGGAAAAGGAA---- morR 18 1
-----CATGGAAAAGGAAGGGCA- morR 18 1

```

>mmu-mir-679

```

AGGCTACTCCCTATGGCTTTGGACTGTGAGGTGACTCTTGGTGTGTGATGGCTTTTCAGCAAGGTCCTC species len reads
AGGCTACTCCCTATGGCT----- morL 18 1
---CTACTCCCTATGGCTTTG----- morL 18 1
-GGCTACTCCCTATGGCTTTGG----- morL 21 1
---TACTCCCTATGGCTTTGG----- morL 18 1
-----GGACTGTGAGGTGACTCTTGG----- mirL 21 583
-----GGACTGTGAGGTGACTCTTGG----- mirL 20 421
-----GGACTGTGAGGTGACTCTTGGT----- mirL 22 113
-----GGACTGTGAGGTGACTCTT----- mirL 19 91
-----GGACTGTGAGGTGACTCT----- mirL 18 54
-----CTGTGAGGTGACTCTTGG----- mirL 18 28
-----ACTGTGAGGTGACTCTTGG----- mirL 19 23
-----GACTGTGAGGTGACTCTTGG----- mirL 19 22

```

```

-----GGACTGTGAGGTGACTCTTGGTG----- mirL 23 21
-----GACTGTGAGGTGACTCTTGG----- mirL 20 16
-----TTGGACTGTGAGGTGACTCTTGG----- mirL 23 10
-----TTGGACTGTGAGGTGACTCTTGG----- mirL 22 9
-----GGACTGTGAGGTGACTCTTGGTG----- mirL 25 5
-----TGGACTGTGAGGTGACTCTTGG----- mirL 22 5
-----TTGGACTGTGAGGTGACTCTT----- mirL 21 4
-----ACTGTGAGGTGACTCTTGG----- mirL 18 3
-----GACTGTGAGGTGACTCTT----- mirL 18 3
-----TTGGACTGTGAGGTGACTCT----- mirL 20 3
-----GACTGTGAGGTGACTCTTGGTG----- mirL 23 2
-----TTGGACTGTGAGGTGACTCTTGGTG----- mirL 25 2
-----CTGTGAGGTGACTCTTGGT----- mirL 19 2
-----TTGGACTGTGAGGTGACTC----- mirL 19 1
-----GACTGTGAGGTGACTCTTGGT----- mirL 21 1
-----CTGTGAGGTGACTCTTGGTG----- mirL 20 1
-----GACTGTGAGGTGACTCTTGGTG----- mirL 22 1
-----TGGACTGTGAGGTGACTC----- mirL 18 1
-----ACTGTGAGGTGACTCTTGGT----- mirL 20 1
-----ACTGTGAGGTGACTCTTGGTG----- mirL 21 1
-----GACTGTGAGGTGACTCTTGGTG----- mirL 26 1
-----CTTTCAGCAAGGCCTC mirR 18 1

```

>mmu-mir-471

| Sequence                                                                                    | species | len | reads |
|---------------------------------------------------------------------------------------------|---------|-----|-------|
| TATTGTGAGCAGTGCTTTACGTAGTATAGTGCTTTTCACATTAACAAAAAGTGAAAGGTGCCATACTATGTATAGGAAGGCTTACCATGTT | morL    | 19  | 1     |
| TATTGTGAGCAGTGCTTTA                                                                         | mirL    | 19  | 442   |
| TATTGTGAGCAGTGCTTTA                                                                         | mirL    | 20  | 281   |
| TATTGTGAGCAGTGCTTTA                                                                         | mirL    | 23  | 143   |
| TATTGTGAGCAGTGCTTTA                                                                         | mirL    | 18  | 116   |
| TATTGTGAGCAGTGCTTTA                                                                         | mirL    | 24  | 105   |
| TATTGTGAGCAGTGCTTTA                                                                         | mirL    | 21  | 56    |
| TATTGTGAGCAGTGCTTTA                                                                         | mirL    | 18  | 39    |
| TATTGTGAGCAGTGCTTTA                                                                         | mirL    | 25  | 39    |
| TATTGTGAGCAGTGCTTTA                                                                         | mirL    | 19  | 34    |
| TATTGTGAGCAGTGCTTTA                                                                         | mirL    | 20  | 22    |
| TATTGTGAGCAGTGCTTTA                                                                         | mirL    | 18  | 20    |
| TATTGTGAGCAGTGCTTTA                                                                         | mirL    | 22  | 17    |
| TATTGTGAGCAGTGCTTTA                                                                         | mirL    | 20  | 17    |
| TATTGTGAGCAGTGCTTTA                                                                         | mirL    | 19  | 15    |
| TATTGTGAGCAGTGCTTTA                                                                         | mirL    | 19  | 13    |
| TATTGTGAGCAGTGCTTTA                                                                         | mirL    | 18  | 10    |
| TATTGTGAGCAGTGCTTTA                                                                         | mirL    | 23  | 10    |
| TATTGTGAGCAGTGCTTTA                                                                         | mirL    | 21  | 7     |
| TATTGTGAGCAGTGCTTTA                                                                         | mirL    | 22  | 5     |
| TATTGTGAGCAGTGCTTTA                                                                         | mirL    | 20  | 5     |

```

-----ACGTAGTATAGTGCTTTTCAC----- mirL 21 4
-----GTAGTATAGTGCTTTTCACAT----- mirL 21 2
-----ACGTAGTATAGTGCTTTTCACATT----- mirL 24 1
-----GTAGTATAGTGCTTTTCACATT----- mirL 22 1
-----TTACGTAGTATAGTGCTTTTCA----- mirL 22 1
-----ACATTAACAAAAAGTGA----- loop 18 1
-----TTTCACATTAACAAAA----- loop 18 1
-----GAAAGGTGCCATACTATG----- mirR 18 5
-----TGAAAGGTGCCATACTAT----- mirR 18 4
-----AGGTGCCATACTATGTAT----- mirR 18 2
-----TGAAAGGTGCCATACTATGTA----- mirR 21 1
-----GAAAGGTGCCATACTATGT----- mirR 19 1
-----TGAAAGGTGCCATACTATG----- mirR 19 1
-----TGAAAGGTGCCATACTATGT----- mirR 20 1
-----AAGGTGCCATACTATGTA----- mirR 18 1
-----TGAAAGGTGCCATACTATGTAT----- mirR 22 1
-----GTATAGGAAGGCTTACCA----- morR 18 1
-----AGGAAGGCTTACCATGTT morR 18 1

```

>mmu-mir-486

| Species | len | reads |
|---------|-----|-------|
| morL    | 18  | 2     |
| morL    | 18  | 1     |
| morL    | 18  | 1     |
| mirL    | 23  | 130   |
| mirL    | 24  | 62    |
| mirL    | 25  | 48    |
| mirL    | 26  | 5     |
| mirL    | 22  | 4     |
| mirL    | 22  | 3     |
| mirL    | 23  | 2     |
| mirL    | 21  | 2     |
| mirL    | 22  | 1     |
| mirL    | 20  | 1     |
| mirL    | 19  | 1     |
| mirL    | 23  | 1     |
| mirL    | 18  | 1     |
| mirL    | 19  | 1     |
| loop    | 18  | 1     |
| loop    | 18  | 1     |
| mirR    | 21  | 721   |
| mirR    | 22  | 196   |
| mirR    | 23  | 151   |
| mirR    | 18  | 38    |
| mirR    | 19  | 15    |
| mirR    | 24  | 12    |

```

-----GGGGCAGCTCAGTACAGGAT----- mirR 20 9
-----CGGGGCAGCTCAGTACAGGATGCGT----- mirR 25 4
-----GGCAGCTCAGTACAGGATGCGT----- mirR 22 3
-----GGGGCAGCTCAGTACAGGATG----- mirR 21 1
-----TCGGGGCAGCTCAGTACAGGATG----- mirR 23 1
-----CGGGGCAGCTCAGTACAGGATGCGTCA----- mirR 27 1
-----GGGGCAGCTCAGTACAGGATGC----- mirR 22 1
-----GGCAGCTCAGTACAGGATGC----- mirR 20 1
-----TGCCTCAGGGTGGGAGAC--- morR 18 1
-----GCGTCAGGGTGGGAGACAAC- morR 20 1
-----CGTCAGGGTGGGAGACAACG morR 20 1
-----GTCAGGGTGGGAGACAAC- morR 18 1

```

>mmu-mir-1968

| Sequence                                                                             | species | len | reads |
|--------------------------------------------------------------------------------------|---------|-----|-------|
| TCTGCAGCTGTTAAGGATGGTGGACTATTGTTAGGGCCACCACCTCTGCAGCTGTTAAGGAGGGTGTCCCTACTTCCTGTCCAG | mirL    | 24  | 538   |
| --TGCAGCTGTTAAGGATGGTGGACT-----                                                      | mirL    | 25  | 382   |
| --TGCAGCTGTTAAGGATGGTGGACTA-----                                                     | mirL    | 23  | 137   |
| --TGCAGCTGTTAAGGATGGTGGAC-----                                                       | mirL    | 26  | 70    |
| --TGCAGCTGTTAAGGATGGTGGACTAT-----                                                    | mirL    | 22  | 67    |
| --TGCAGCTGTTAAGGATGGTGGAA-----                                                       | mirL    | 23  | 32    |
| ---GCAGCTGTTAAGGATGGTGGACT-----                                                      | mirL    | 19  | 23    |
| ---TGCAGCTGTTAAGGATGGT-----                                                          | mirL    | 24  | 20    |
| ---GCAGCTGTTAAGGATGGTGGACTA-----                                                     | mirL    | 22  | 18    |
| ---AGCTGTTAAGGATGGTGGACTA-----                                                       | mirL    | 20  | 17    |
| ---TGCAGCTGTTAAGGATGGTG-----                                                         | mirL    | 22  | 13    |
| ----CAGCTGTTAAGGATGGTGGACT-----                                                      | mirL    | 21  | 11    |
| ----AGCTGTTAAGGATGGTGGACT-----                                                       | mirL    | 23  | 9     |
| ----CAGCTGTTAAGGATGGTGGACTA-----                                                     | mirL    | 22  | 7     |
| ----GCAGCTGTTAAGGATGGTGGAC-----                                                      | mirL    | 19  | 4     |
| ----AGCTGTTAAGGATGGTGGAA-----                                                        | mirL    | 23  | 4     |
| TCTGCAGCTGTTAAGGATGGTGG-----                                                         | mirL    | 18  | 3     |
| ---GCAGCTGTTAAGGATGGT-----                                                           | mirL    | 19  | 2     |
| ---GCAGCTGTTAAGGATGGTG-----                                                          | mirL    | 23  | 2     |
| -CTGCAGCTGTTAAGGATGGTGGAA-----                                                       | mirL    | 20  | 2     |
| ----AGCTGTTAAGGATGGTGGAC-----                                                        | mirL    | 24  | 2     |
| -CTGCAGCTGTTAAGGATGGTGGAC-----                                                       | mirL    | 23  | 2     |
| ----AGCTGTTAAGGATGGTGGACTAT-----                                                     | mirL    | 21  | 2     |
| ---GCAGCTGTTAAGGATGGTGGAA-----                                                       | mirL    | 25  | 2     |
| ---GCAGCTGTTAAGGATGGTGGACTAT-----                                                    | mirL    | 24  | 2     |
| ----AGCTGTTAAGGATGGTGGACTATT-----                                                    | mirL    | 22  | 2     |
| TCTGCAGCTGTTAAGGATGGTG-----                                                          | mirL    | 20  | 1     |
| -CTGCAGCTGTTAAGGATGGT-----                                                           | mirL    | 20  | 1     |
| TCTGCAGCTGTTAAGGATGG-----                                                            | mirL    | 24  | 1     |
| ----CAGCTGTTAAGGATGGTGGACTAT-----                                                    | mirL    | 18  | 1     |
| ----CAGCTGTTAAGGATGGTG-----                                                          | mirL    | 25  | 1     |
| TCTGCAGCTGTTAAGGATGGTGGAC-----                                                       | mirL    |     |       |

```
TCTGCAGCTGTTAAGGATGGTGGA----- mirL 24 1
----CAGCTGTTAAGGATGGTGGA----- mirL 20 1
-----TATTGTTAGGGCCACCAC----- loop 18 1
-----TGCAGCTGTTAAGGAGGG----- mirR 18 4
-----TGCAGCTGTTAAGGAGGGTGC----- mirR 21 3
-----TGCAGCTGTTAAGGAGGGT----- mirR 19 3
-----TGCAGCTGTTAAGGAGGGTGCTCC----- mirR 24 2
-----CTCTGCAGCTGTTAAGGAG----- mirR 19 1
-----TGCAGCTGTTAAGGAGGGTGCTCCCT----- mirR 26 1
-----CTGCAGCTGTTAAGGAGG----- mirR 18 1
-----GCTCCCTACTTCCTGTCCA- morR 19 1
-----GGGTGCTCCCTACTTCCT- morR 18 1
-----GTGCTCCCTACTTCCTGT- morR 18 1
-----CTCCCTACTTCCTGTCCAG morR 19 1
```

>mmu-mir-1902

```
TATTTTGGGAGTGTGCTGTATAATTGGACTTGATAAAATGTTTAGAGGTGCAGTAGGCATGACTTGAGTAGATAATGAGAGGAAAT species len reads
TATTTTGGGAGTGTGCT----- mirL 19 1
-ATTTTGGGAGTGTGCTGT----- mirL 20 1
-----AGAGGTGCAGTAGGCATGACTT----- mirR 22 743
-----AGAGGTGCAGTAGGCATGACTTG----- mirR 23 205
-----AGAGGTGCAGTAGGCATGA----- mirR 19 108
-----AGAGGTGCAGTAGGCATGACT----- mirR 21 74
-----AGAGGTGCAGTAGGCATGAC----- mirR 20 69
-----AGGTGCAGTAGGCATGACTT----- mirR 20 31
-----AGAGGTGCAGTAGGCATG----- mirR 18 30
-----GGTGCAGTAGGCATGACTT----- mirR 19 28
-----GAGGTGCAGTAGGCATGACTT----- mirR 21 23
-----AGGTGCAGTAGGCATGACTTG----- mirR 21 15
-----AGAGGTGCAGTAGGCATGACTTGA----- mirR 24 9
-----TAGAGGTGCAGTAGGCATGACTT----- mirR 23 9
-----GGTGCAGTAGGCATGACTTG----- mirR 20 8
-----GAGGTGCAGTAGGCATGA----- mirR 18 7
-----GAGGTGCAGTAGGCATGACTTG----- mirR 22 5
-----AGGTGCAGTAGGCATGACT----- mirR 19 4
-----GGTGCAGTAGGCATGACT----- mirR 18 4
-----GAGGTGCAGTAGGCATGAC----- mirR 19 3
-----AGGTGCAGTAGGCATGAC----- mirR 18 2
-----TAGAGGTGCAGTAGGCATGA----- mirR 20 2
-----TTAGAGGTGCAGTAGGCATGACTTG----- mirR 25 2
-----GGTGCAGTAGGCATGACTTGA----- mirR 21 1
-----GAGGTGCAGTAGGCATGACTTGA----- mirR 23 1
-----TAGAGGTGCAGTAGGCATGAC----- mirR 21 1
-----GAGGTGCAGTAGGCATGACT----- mirR 20 1
-----TAGAGGTGCAGTAGGCATGACTTG----- mirR 24 1
-----TAGATAATGAGAGGAAAT morR 18 1
```



```

-----GTAGATAATGAGAGGAAA- morR 18 1

>mmu-mir-1907
GCCCGGTGCCCCCTCCCCCTCCAGCCCCACTCCCCCTCGCTGTCTCTTGTCTGGCTGATTTAATTCTCTCTACCGGAGCAGCAGAGGATCTGGAGGTGGCTGGACCCGAGGGGCCGC species len reads
----GGTGCCCCCTCCCCCTCC----- morL 18 4
-GCCCGGTGCCCCCTCCCCC----- morL 18 3
----GTGCCCCCTCCCCCTCCC----- morL 18 2
--CCGGTGCCCCCTCCCCCT----- morL 18 2
--CGGTGCCCCCTCCCCCTC----- morL 18 2
--CCGGTGCCCCCTCCCCCTC----- morL 19 1
-GCCCGGTGCCCCCTCCCCCTC----- morL 20 1
GCCCGGTGCCCCCTCCCCC----- morL 18 1
GCCCGGTGCCCCCTCCCCC----- morL 19 1
-----TCCCAGCCCCACTCCCC----- mirL 18 8
-----CCCAGCCCCACTCCCCCTC----- mirL 19 4
-----CCCAGCCCCACTCCCCCT----- mirL 18 4
-----CTCCCAGCCCCACTCCCC----- mirL 19 3
-----CCTCCCAGCCCCACTCCC----- mirL 18 2
-----CAGCCCCACTCCCCCTCG----- mirL 18 1
-----CCAGCCCCACTCCCCCTC----- mirL 18 1
-----TCCCAGCCCCACTCCCCCTC----- mirL 20 1
-----AGCCCCACTCCCCCTCGCT----- mirL 19 1
-----CTCCCAGCCCCACTCCCCCTC----- mirL 21 1
-----CCTCCCAGCCCCACTCCCC----- mirL 19 1
-----GAGCAGCAGAGGATCTGGAGGT----- mirR 22 716
-----GAGCAGCAGAGGATCTGGAGGTG----- mirR 23 342
-----GAGCAGCAGAGGATCTGGAGG----- mirR 21 77
-----GAGCAGCAGAGGATCTGGAGGTGG----- mirR 24 59
-----GAGCAGCAGAGGATCTGGAG----- mirR 20 30
-----AGCAGCAGAGGATCTGGAGGT----- mirR 21 28
-----GAGCAGCAGAGGATCTGG----- mirR 18 28
-----GAGCAGCAGAGGATCTGGA----- mirR 19 21
-----GCAGCAGAGGATCTGGAGGT----- mirR 20 9
-----AGCAGCAGAGGATCTGGAGGTG----- mirR 22 8
-----GGAGCAGCAGAGGATCTGGAGGT----- mirR 23 7
-----GCAGCAGAGGATCTGGAGGTG----- mirR 21 5
-----CAGCAGAGGATCTGGAGGT----- mirR 19 4
-----GGAGCAGCAGAGGATCTGGAGGTG----- mirR 24 2
-----AGCAGCAGAGGATCTGGAG----- mirR 19 1
-----GCAGCAGAGGATCTGGAGGTGG----- mirR 22 1
-----CTGGACCCGAGGGGCCGC morR 18 1
-----GGCTGGACCCGAGGGGCC-- morR 18 1

>mmu-mir-3475
ACCAAGACTATGCTCTGCTCCCAAATCATGTACCCCCACAGAGGGTCCAGATGGTTCTTAGTTCTTCTGGAGGCACATGTTTGAAGAGCAGAGCACAAGACTGG species len reads
-----CTATGCTCTGCTCCCAA----- morL 18 2

```

```

-CCAAGACTATGCTCTGCTCCC----- morL 21 2
ACCAAGACTATGCTCTGCTC----- morL 20 2
ACCAAGACTATGCTCTGCT----- morL 19 1
----GACTATGCTCTGCTCCCA----- morL 19 1
-----CAAATCATGTACCCCCACAGAG----- mirL 22 7
-----CAAATCATGTACCCCCACAGA----- mirL 21 5
-----AAATCATGTACCCCCACAGAG----- mirL 21 3
-----CAAATCATGTACCCCCACAGAGG----- mirL 23 2
-----CAAATCATGTACCCCCAC----- mirL 18 2
-----AAATCATGTACCCCCACAGAGG----- mirL 22 2
-----ATCATGTACCCCCACAGA----- mirL 18 1
-----CCCCAAATCATGTACCCC----- mirL 18 1
-----CCCCAAATCATGTACCCCA----- mirL 21 1
-----TCTGGAGGCACATGGTTTGA----- mirR 20 341
-----TCTGGAGGCACATGGTTTGAAG----- mirR 22 261
-----TCTGGAGGCACATGGTTTGA----- mirR 19 167
-----TTCTGGAGGCACATGGTTTGA----- mirR 21 147
-----TTCTGGAGGCACATGGTTTGA----- mirR 20 119
-----TCTGGAGGCACATGGTTTGA----- mirR 21 117
-----TCTGGAGGCACATGGTTTGAAGA----- mirR 23 51
-----TTCTGGAGGCACATGGTTTGA----- mirR 22 21
-----TTCTGGAGGCACATGGTTT----- mirR 19 20
-----CTTCTGGAGGCACATGGTTTGA----- mirR 22 18
-----TCTGGAGGCACATGGTTT----- mirR 18 14
-----TCTGGAGGCACATGGTTTGAAGAGC----- mirR 25 9
-----CTTCTGGAGGCACATGGTTTGA----- mirR 21 7
-----CTGGAGGCACATGGTTTGAAG----- mirR 21 7
-----TTCTGGAGGCACATGGTTTGAAG----- mirR 23 6
-----TTCTGGAGGCACATGGTT----- mirR 18 6
-----CTGGAGGCACATGGTTTGA----- mirR 18 5
-----CTGGAGGCACATGGTTTGA----- mirR 20 4
-----CTGGAGGCACATGGTTTGA----- mirR 19 4
-----CTTCTGGAGGCACATGGT----- mirR 18 3
-----CTGGAGGCACATGGTTTGAAGA----- mirR 22 2
-----TGGAGGCACATGGTTTGAAGAGC----- mirR 23 2
-----CTTCTGGAGGCACATGGTTT----- mirR 20 2
-----CTTCTGGAGGCACATGGTTTGAAG----- mirR 24 1
-----TTCTGGAGGCACATGGTTTGAAGAG----- mirR 25 1
-----AGCAGAGCACAAAGACTGG morR 18 2

```

>mmu-mir-291a

```

TGTTACACCTATGTAGCGGCCATCAAAGTGGAGGCCCTCTCTTGAGCCTGAATGAGAAAGTGCTTCCACTTTGTGTGCCAC species len reads
TGTTACACCTATGTAGCG----- morL 18 1
-----CATCAAAGTGGAGGCCCTCTCT----- mirL 22 772
-----CATCAAAGTGGAGGCCCTCTC----- mirL 21 98
-----CATCAAAGTGGAGGCCCTCTCT----- mirL 23 78

```

```

-----CATCAAAGTGGAGGCCCTCT----- mirL 20 45
-----CATCAAAGTGGAGGCCCTC----- mirL 19 41
-----CATCAAAGTGGAGGCCCT----- mirL 18 29
-----TCAAAGTGGAGGCCCTCTCT----- mirL 20 9
-----ATCAAAGTGGAGGCCCTCTCT----- mirL 21 8
-----CAAAGTGGAGGCCCTCTCT----- mirL 19 5
-----CATCAAAGTGGAGGCCCTCTCTTGAGC----- mirL 27 5
-----ATCAAAGTGGAGGCCCTCTCTTT----- mirL 22 3
-----TCAAAGTGGAGGCCCTCTCT----- mirL 21 2
-----CCATCAAAGTGGAGGCC----- mirL 18 1
-----CCATCAAAGTGGAGGCCCTCTCT----- mirL 24 1
-----CCATCAAAGTGGAGGCCCTCTCT----- mirL 23 1
-----TGAGCCTGAATGAGAAAAG----- loop 18 1
-----GAGCCTGAATGAGAAAAG----- loop 18 1
-----CTTGAGCCTGAATGAGAAAAG----- loop 20 1
-----AGTGCTTCCACTTTGTGTGC----- mirR 20 52
-----GTGCTTCCACTTTGTGTGC----- mirR 19 28
-----AAAGTGCTTCCACTTTGTGTGCC----- mirR 23 25
-----AAAGTGCTTCCACTTTGTGTGC----- mirR 22 20
-----TGCTTCCACTTTGTGTGC----- mirR 18 17
-----AAGTGCTTCCACTTTGTGTGC----- mirR 21 15
-----AGTGCTTCCACTTTGTGTGCC----- mirR 21 11
-----AAAGTGCTTCCACTTTGTGTG----- mirR 21 9
-----TGCTTCCACTTTGTGTGCC----- mirR 19 8
-----AAAGTGCTTCCACTTTGTGTGCCA----- mirR 24 7
-----GCTTCCACTTTGTGTGCC----- mirR 18 7
-----AGTGCTTCCACTTTGTGTG----- mirR 19 5
-----GCTTCCACTTTGTGTGCCA----- mirR 19 5
-----GTGCTTCCACTTTGTGTGCCA----- mirR 21 4
-----AAAGTGCTTCCACTTTGT----- mirR 18 4
-----AAAGTGCTTCCACTTTGTGT----- mirR 20 4
-----AAGTGCTTCCACTTTGTGT----- mirR 19 4
-----AGTGCTTCCACTTTGTGT----- mirR 18 4
-----AGTGCTTCCACTTTGTGTGCCA----- mirR 22 4
-----AAGTGCTTCCACTTTGTGTGCCA----- mirR 23 3
-----AAGTGCTTCCACTTTGTGTGCC----- mirR 22 3
-----GTGCTTCCACTTTGTGTG----- mirR 18 3
-----GTGCTTCCACTTTGTGTGCC----- mirR 20 2
-----AAAGTGCTTCCACTTTGTGTGCCAC----- mirR 25 1
-----AGTGCTTCCACTTTGTGTGCCAC----- mirR 23 1
-----AAGTGCTTCCACTTTGTGTG----- mirR 20 1

>mmu-mir-194-2
CCCCCGTGGCTCCCACCCTCTGTAACAGCAACTCCATGTGGAAGTGCCCACTGGTTCCAGTGGGGCTGCTGTTATCTGGGG species len reads
CCCCCGTGGCTCCCACCCTC----- morL 21 4
CCCCCGTGGCTCCCACC----- morL 18 4

```

```

--CCCCGTGGCTCCCACCCT----- morL 18 3
-CCCCGTGGCTCCCACCCTC----- morL 20 3
-CCCCGTGGCTCCCACC----- morL 18 3
--CCCCGTGGCTCCCACCCTC----- morL 19 2
CCCCCGTGGCTCCCACC----- morL 19 1
-----TGTAACAGCAACTCCATGTGG----- mirL 21 433
-----TGTAACAGCAACTCCATGTGGA----- mirL 22 241
-----TGTAACAGCAACTCCATGTGGAAG----- mirL 24 134
-----TGTAACAGCAACTCCATGTG----- mirL 20 117
-----TGTAACAGCAACTCCATGTGGA----- mirL 23 114
-----TGTAACAGCAACTCCATGT----- mirL 19 77
-----TGTAACAGCAACTCCATG----- mirL 18 63
-----GTAACAGCAACTCCATGTGG----- mirL 20 15
-----GTAACAGCAACTCCATGT----- mirL 18 14
-----GTAACAGCAACTCCATGTGGA----- mirL 22 13
-----AACAGCAACTCCATGTGG----- mirL 18 10
-----GTAACAGCAACTCCATGTGGA----- mirL 21 9
-----AACAGCAACTCCATGTGGA----- mirL 19 4
-----GTAACAGCAACTCCATGTGGAAG----- mirL 23 4
-----GTAACAGCAACTCCATGTGGAAGTG----- mirL 25 4
-----CTGTAACAGCAACTCCATGTGG----- mirL 22 3
-----CTGTAACAGCAACTCCATGTGGA----- mirL 23 3
-----CTGTAACAGCAACTCCATGTG----- mirL 21 3
-----GTAACAGCAACTCCATGTGGAAGT----- mirL 24 3
-----TAACAGCAACTCCATGTGG----- mirL 19 2
-----CTGTAACAGCAACTCCAT----- mirL 18 1
-----CTGTAACAGCAACTCCATG----- mirL 19 1
-----AACAGCAACTCCATGTGGAAGTGCC----- mirL 25 1
-----TAACAGCAACTCCATGTG----- mirL 18 1
-----CTGTAACAGCAACTCCATGT----- mirL 20 1
-----TGGAAGTGCCCACTGGTTC----- loop 19 1
-----TGGAAGTGCCCACTGGTTCCA----- loop 21 1
-----GGAAGTGCCCACTGGTTCC----- loop 19 1
-----CCAGTGGGGCTGCTGTTATCT----- mirR 21 18
-----CCAGTGGGGCTGCTGTTAT----- mirR 19 9
-----CCAGTGGGGCTGCTGTTATCTGG----- mirR 23 8
-----CCAGTGGGGCTGCTGTTATC----- mirR 20 7
-----CCAGTGGGGCTGCTGTTATCTG----- mirR 22 6
-----CCAGTGGGGCTGCTGTTATCTGGGG----- mirR 25 2
-----CCAGTGGGGCTGCTGTTA----- mirR 18 1
-----GTGGGGCTGCTGTTATCTG----- mirR 19 1

```

>mmu-mir-3083

```

ATATATATAAAGTAAAGGCTGGGAATATTTTCAGAGATATATATGTATATCTCCGAAACATTCCCAGCCTTTACT species len reads
ATATATATAAAGTAAAGG----- morL 18 2
-----AGGCTGGGAATATTTTCAGAGAT----- mirL 22 127

```

```

-----AAGGCTGGGAATATTTTCAGAGA----- mirL 22 41
-----AGGCTGGGAATATTTTCAGAGA----- mirL 21 36
-----AGGCTGGGAATATTTTCAGAGATA----- mirL 23 32
-----AAGGCTGGGAATATTTTCAGAGAT----- mirL 23 30
-----AGGCTGGGAATATTTTCAGAGATAT----- mirL 24 14
-----AAGGCTGGGAATATTTTCAGAG----- mirL 21 10
-----AAGGCTGGGAATATTTTCAGA----- mirL 20 7
-----AAAGGCTGGGAATATTTTCAGAGA----- mirL 23 6
-----AGGCTGGGAATATTTTCAGAG----- mirL 20 4
-----AGGCTGGGAATATTTTCAGA----- mirL 19 3
-----TAAAGGCTGGGAATATTTTCAG----- mirL 21 1
-----AGGCTGGGAATATTTTCAG----- mirL 18 1
-----AAAGGCTGGGAATATTTTCAGAG----- mirL 22 1
-----AAGGCTGGGAATATTTTCAGAGATA----- mirL 24 1
-----TCTCCGAAACATTCCCAGCCTTT----- mirR 23 155
-----TCCGAAACATTCCCAGCCTTTAC----- mirR 23 107
-----TCCGAAACATTCCCAGCCTTTA----- mirR 22 87
-----TCCGAAACATTCCCAGCCTTT----- mirR 21 74
-----TCTCCGAAACATTCCCAGCCTT----- mirR 22 71
-----CTCCGAAACATTCCCAGCCTTT----- mirR 22 67
-----TCTCCGAAACATTCCCAGCCT----- mirR 21 58
-----TCTCCGAAACATTCCCAGCCTTTA----- mirR 24 54
-----TCTCCGAAACATTCCCAGCCTTTAC----- mirR 25 47
-----CTCCGAAACATTCCCAGCCTTTA----- mirR 23 39
-----CCGAAACATTCCCAGCCTTTAC----- mirR 22 34
-----TCTCCGAAACATTCCCAGCC----- mirR 20 31
-----CTCCGAAACATTCCCAGCCTTTAC----- mirR 24 30
-----TCTCCGAAACATTCCCAGC----- mirR 19 29
-----ATCTCCGAAACATTCCCAGCCT----- mirR 22 22
-----CCGAAACATTCCCAGCCTTTA----- mirR 21 13
-----CCGAAACATTCCCAGCCTTT----- mirR 20 10
-----TATCTCCGAAACATTCCCAGCC----- mirR 22 9
-----CTCCGAAACATTCCCAGCC----- mirR 19 7
-----TCCGAAACATTCCCAGCCTT----- mirR 20 6
-----ATCTCCGAAACATTCCCAGCCTT----- mirR 23 6
-----ATCTCCGAAACATTCCCAGC----- mirR 20 6
-----CTCCGAAACATTCCCAGC----- mirR 18 5
-----CTCCGAAACATTCCCAGCCTT----- mirR 21 4
-----TCCGAAACATTCCCAGCC----- mirR 18 4
-----TCCGAAACATTCCCAGCCT----- mirR 19 4
-----ATCTCCGAAACATTCCCAGCCTTT----- mirR 24 3
-----TATCTCCGAAACATTCCCAGCCTT----- mirR 24 3
-----TATCTCCGAAACATTCCCAGC----- mirR 21 3
-----ATCTCCGAAACATTCCCA----- mirR 18 3
-----TATCTCCGAAACATTCCCAG----- mirR 20 3
-----ATATCTCCGAAACATTCCCAG----- mirR 22 2

```

```

-----ATCTCCGAAACATTCCCAGCC----- mirR 21 2
-----CCGAAACATGCCAGCCT----- mirR 18 2
-----CTCCGAAACATTCCCAGCCT----- mirR 20 2
-----TATCTCCGAAACATGCCAGCCT----- mirR 23 1
-----ATCTCCGAAACATTCCCAGCCTTTA-- mirR 25 1
-----TCCGAAACATGCCAGCCTTTACT mirR 24 1
-----ATATCTCCGAAACATTCCC----- mirR 19 1
-----CCGAAACATGCCAGCCTTTACT mirR 23 1
-----ATATCTCCGAAACATTCCCAGCC----- mirR 23 1
-----TATCTCCGAAACATTCCC----- mirR 18 1

```

>mmu-mir-3107

| Species | len | reads |
|---------|-----|-------|
| morL    | 18  | 2     |
| morL    | 18  | 1     |
| mirL    | 23  | 904   |
| mirL    | 24  | 41    |
| mirL    | 25  | 9     |
| mirL    | 22  | 8     |
| mirL    | 23  | 3     |
| mirL    | 28  | 1     |
| mirL    | 21  | 1     |
| mirL    | 19  | 1     |
| mirL    | 26  | 1     |
| loop    | 18  | 2     |
| loop    | 18  | 1     |
| loop    | 19  | 1     |
| loop    | 18  | 1     |
| loop    | 19  | 1     |
| loop    | 21  | 1     |
| mirR    | 22  | 170   |
| mirR    | 21  | 122   |
| mirR    | 23  | 23    |
| mirR    | 24  | 7     |
| mirR    | 20  | 4     |
| mirR    | 19  | 4     |
| mirR    | 19  | 3     |
| mirR    | 18  | 3     |
| mirR    | 23  | 2     |
| mirR    | 23  | 1     |
| mirR    | 21  | 1     |
| morR    | 18  | 3     |
| morR    | 19  | 1     |
| morR    | 19  | 1     |
| morR    | 19  | 1     |

>mmu-mir-686

| Sequence                                                                                       | species | len | reads |
|------------------------------------------------------------------------------------------------|---------|-----|-------|
| ATTGCTTCCCAGACGGTGAAGAAAGTAATAGAGATCAACCCGTACCTTCTGGGCACCATGGCTGGGGGTGCAGCGGATTCAGCTTCTGGGAGCG | mirL 22 | 646 |       |
| ATTGCTTCCCAGACGGTGAAGA-----                                                                    | mirL 23 | 326 |       |
| ATTGCTTCCCAGACGGTGAAG-----                                                                     | mirL 21 | 102 |       |
| ATTGCTTCCCAGACGGTGA-----                                                                       | mirL 19 | 88  |       |
| ATTGCTTCCCAGACGGTGA-----                                                                       | mirL 20 | 58  |       |
| ATTGCTTCCCAGACGGTGAAGAAA-----                                                                  | mirL 24 | 34  |       |
| ATTGCTTCCCAGACGGTGA-----                                                                       | mirL 18 | 19  |       |
| ---GCTTCCCAGACGGTGAAGAA-----                                                                   | mirL 20 | 7   |       |
| -TTGCTTCCCAGACGGTGAAGA-----                                                                    | mirL 21 | 6   |       |
| --TGCTTCCCAGACGGTGAAGAA-----                                                                   | mirL 21 | 5   |       |
| ---GCTTCCCAGACGGTGAAGA-----                                                                    | mirL 19 | 5   |       |
| --TGCTTCCCAGACGGTGAAGA-----                                                                    | mirL 20 | 5   |       |
| --TGCTTCCCAGACGGTGAAGAAA-----                                                                  | mirL 22 | 4   |       |
| -TTGCTTCCCAGACGGTGAAGAA-----                                                                   | mirL 22 | 3   |       |
| ---GCTTCCCAGACGGTGAAGAAA-----                                                                  | mirL 21 | 2   |       |
| -TTGCTTCCCAGACGGTGA-----                                                                       | mirL 18 | 2   |       |
| --TGCTTCCCAGACGGTGAAG-----                                                                     | mirL 19 | 1   |       |
| -TTGCTTCCCAGACGGTGAAGAAAGTAATAGA-----                                                          | mirL 31 | 1   |       |
| --TGCTTCCCAGACGGTGA-----                                                                       | mirL 18 | 1   |       |
| -TTGCTTCCCAGACGGTGAAGAAA-----                                                                  | mirL 23 | 1   |       |
| ---GCTTCCCAGACGGTGAAG-----                                                                     | mirL 18 | 1   |       |
| -----GGATTGCAGCTTCTGGGA---                                                                     | mirR 18 | 1   |       |
| -----ATTGCAGCTTCTGGGAGCG                                                                       | mirR 19 | 1   |       |

>mmu-mir-763

| Sequence                                                                                                    | species | len | reads |
|-------------------------------------------------------------------------------------------------------------|---------|-----|-------|
| TCCTGGGGATTAATGACCAGCTGGGAAGAACCAGTGGCCCTCGGCTCTGCCTCCCAGCCAGCCATTAAGTCAAGGAAATGTCTTTTGCTGAGGTCGTTACTGCTATT | morL 19 | 1   |       |
| TCCTGGGGATTAATGACCA-----                                                                                    | mirL 22 | 729 |       |
| -----CCAGCTGGGAAGAACCAGTGGC-----                                                                            | mirL 23 | 284 |       |
| -----CCAGCTGGGAAGAACCAGTGGCC-----                                                                           | mirL 21 | 116 |       |
| -----CCAGCTGGGAAGAACCAGTGGCC-----                                                                           | mirL 24 | 34  |       |
| -----CCAGCTGGGAAGAACCAGTG-----                                                                              | mirL 20 | 33  |       |
| -----CCAGCTGGGAAGAACCAGT-----                                                                               | mirL 19 | 23  |       |
| -----CAGCTGGGAAGAACCAGTGGC-----                                                                             | mirL 21 | 18  |       |
| -----CCAGCTGGGAAGAACCAG-----                                                                                | mirL 18 | 16  |       |
| -----AGCTGGGAAGAACCAGTGGC-----                                                                              | mirL 20 | 14  |       |
| -----GCTGGGAAGAACCAGTGGC-----                                                                               | mirL 19 | 8   |       |
| -----AGCTGGGAAGAACCAGTGGCC-----                                                                             | mirL 21 | 4   |       |
| -----CAGCTGGGAAGAACCAGTGGCC-----                                                                            | mirL 22 | 3   |       |
| -----GCTGGGAAGAACCAGTGG-----                                                                                | mirL 18 | 2   |       |
| -----ACCAGCTGGGAAGAACCAGTGGC-----                                                                           | mirL 23 | 1   |       |
| -----AGCTGGGAAGAACCAGTGG-----                                                                               | mirL 19 | 1   |       |
| -----AGCTGGGAAGAACCAGTG-----                                                                                | mirL 18 | 1   |       |
| -----CAGCTGGGAAGAACCAGTGG-----                                                                              | mirL 20 | 1   |       |

```

-----AGCTGGGAAGAACCAGTGGCCCTC----- mirL 24 1
-----CCAAGGAAATGTCCTTTG----- mirR 18 3
-----CTCCAAGGAAATGTCCTTT----- mirR 19 1
-----CTCCAAGGAAATGTCCTT----- mirR 18 1
-----CCAAGGAAATGTCCTTTGCT----- mirR 20 1
-----AAGGAAATGTCCTTTGCT----- mirR 18 1
-----GCTGAGGTCGTTACTGCT--- morR 18 1
-----GAGGTCGTTACTGCTATT morR 18 1

```

>mmu-mir-669c

| Sequence                                                                  | species | len | reads |
|---------------------------------------------------------------------------|---------|-----|-------|
| TGTATAGTTGTGTGGATGTGTATTTCATATAAATAACATACACACACACACAAGTAAACACAAGTGCACAAAC | mirL    | 22  | 627   |
| ---ATAGTTGTGTGGATGTGTGT---                                                | mirL    | 20  | 169   |
| ---ATAGTTGTGTGGATGTGT---                                                  | mirL    | 21  | 167   |
| ---ATAGTTGTGTGGATGTGT---                                                  | mirL    | 24  | 64    |
| ---ATAGTTGTGTGGATGT---                                                    | mirL    | 18  | 58    |
| ---ATAGTTGTGTGGATGTGTATT---                                               | mirL    | 25  | 50    |
| ---ATAGTTGTGTGGATGTG---                                                   | mirL    | 19  | 39    |
| ---AGTTGTGTGGATGTGT---                                                    | mirL    | 20  | 35    |
| ---GTTGTGTGGATGTGT---                                                     | mirL    | 19  | 13    |
| ---AGTTGTGTGGATGTGT---                                                    | mirL    | 22  | 9     |
| ---TATAGTTGTGTGGATGTGT---                                                 | mirL    | 23  | 6     |
| ---TAGTTGTGTGGATGTGT---                                                   | mirL    | 21  | 6     |
| ---AGTTGTGTGGATGT---                                                      | mirL    | 18  | 5     |
| ---TAGTTGTGTGGATGTGT---                                                   | mirL    | 22  | 4     |
| ---AGTTGTGTGGATGTGT---                                                    | mirL    | 21  | 3     |
| ---AGTTGTGTGGATGTG---                                                     | mirL    | 19  | 3     |
| ---TAGTTGTGTGGATGT---                                                     | mirL    | 19  | 2     |
| ---AGTTGTGTGGATGTGTATTTCATA---                                            | mirL    | 29  | 2     |
| ---TAGTTGTGTGGATGTG---                                                    | mirL    | 20  | 2     |
| ---GTTGTGTGGATGTGT---                                                     | mirL    | 20  | 1     |
| ---TAGTTGTGTGGATGTG---                                                    | mirL    | 18  | 1     |
| ---TATAGTTGTGTGGATGTG---                                                  | mirL    | 22  | 1     |
| ---GTATAGTTGTGTGGATGTGT---                                                | mirL    | 25  | 1     |
| ---GTTGTGTGGATGTGT---                                                     | mirL    | 21  | 1     |
| ---TAGTTGTGTGGATGTGT---                                                   | mirL    | 23  | 1     |
| TGTATAGTTGTGTGGATG---                                                     | mirL    | 20  | 1     |
| ---GTATAGTTGTGTGGATGTGT---                                                | mirL    | 24  | 1     |
| ---TATTTGCATATAAATAAC---                                                  | loop    | 18  | 1     |
| ---CATACACACACACACA---                                                    | mirR    | 18  | 6     |
| ---CATACACACACACAAA---                                                    | mirR    | 19  | 3     |
| ---TAACATACACACACACAC---                                                  | mirR    | 20  | 3     |
| ---ATACACACACACACAAGTAA---                                                | mirR    | 22  | 2     |
| ---AACATACACACACACAC---                                                   | mirR    | 19  | 2     |
| ---TACACACACACACAAGTA---                                                  | mirR    | 20  | 1     |
| ---TACACACACACACAAG---                                                    | mirR    | 18  | 1     |



C:\Documents and Settings\hong\Desktop\Hippocampus-total RNA.txt

```
-----ACACACACACACACAAGTA----- mirR 19 1
-----ACACACACACACACAAGTAAAC----- mirR 22 1
-----ATACACACACACACAAG----- mirR 19 1
-----TAAACACAAGTGCACAAA----- morR 18 2
-----TAAACACAAGTGCACAAA----- morR 19 1
-----AAACACAAGTGCACAAA----- morR 18 1
```

>mmu-mir-1970

```
TGTGCATTGTTGGAGGAAATGTGTCAGTGGGATAGGCTTTGAGGTTTCAGAAGCTCAGTCAGGCCTAGTGGCACTCACTCTTCTGTTGCCTGCAGATCCTTCTGCATATGTGCCTGCA species len reads
TGTGCATTGTTGGAGGAAATG----- morL 21 2
--TGCATTGTTGGAGGAAAT----- morL 18 1
-----TGTGTCAGTGGGATAGGCTTTG----- mirL 23 812
-----TGTGTCAGTGGGATAGGCTTT----- mirL 22 197
-----TGTGTCAGTGGGATAGGCTTTGA----- mirL 24 67
-----GTGTCAGTGGGATAGGCTTTG----- mirL 22 61
-----TGTGTCAGTGGGATAGGCTTT----- mirL 21 56
-----TGTGTCAGTGGGATAGGCT----- mirL 20 21
-----TGTGTCAGTGGGATAGGCTTTGAGGTTTC----- mirL 30 12
-----TGTGTCAGTGGGATAGGC----- mirL 19 11
-----GTCAGTGGGATAGGCTTTG----- mirL 20 9
-----GTGTCAGTGGGATAGGCTTT----- mirL 21 9
-----GTGTCAGTGGGATAGGCTTTGA----- mirL 23 8
-----TGTGTCAGTGGGATAGGCTTTG----- mirL 21 6
-----GTCAGTGGGATAGGCTTT----- mirL 19 3
-----TGTGTCAGTGGGATAGGCTTT----- mirL 20 2
-----TGTGTCAGTGGGATAGGCTTT----- mirL 19 2
-----AAATGTGTCAGTGGGAT----- mirL 18 1
-----GTGTCAGTGGGATAGGCTTTGAG----- mirL 24 1
-----GTCAGTGGGATAGGCTTT----- mirL 18 1
-----GTGTCAGTGGGATAGGC----- mirL 18 1
-----ATGTGTCAGTGGGATAG----- mirL 18 1
-----GTGTCAGTGGGATAGGCTTT----- mirL 20 1
-----GTGTCAGTGGGATAGGCTTTGAGGTT----- mirL 27 1
-----AAATGTGTCAGTGGGATAGGCTTTG----- mirL 26 1
-----TGTGTCAGTGGGATAGGCTTT----- mirL 18 1
-----GTCAGTGGGATAGGCTTTGAGGTTTC----- mirL 27 1
-----ATGTGTCAGTGGGATAGGCTTTG----- mirL 24 1
-----CCTGTTGCCTGCAGATCC----- mirR 18 4
-----CTTCTGTTGCCTGCAGA----- mirR 18 1
-----CCTTCTGCATATGTGCCTG----- morR 19 1
-----CTTCTGCATATGTGCCTGCA----- morR 20 1
-----CTTCTGCATATGTGCCTGC----- morR 19 1
```

>mmu-mir-470

```
AGCTGTGGTGTGCAGTGCTCTTCTTGACTGGCACTGGTGAAGTTAAACTAAATACAACCAGTACCTTTCTGAGAAGAGTAAAGCTCATCACATTCTTT species len reads
AGCTGTGGTGTGCAGTGCT----- morL 19 2
```

|                                    |      |    |     |
|------------------------------------|------|----|-----|
| -----TGGTGTGCAGTGCTCTTC-----       | morL | 18 | 2   |
| -----TTCTTGGACTGGCACTGGTGA-----    | mirL | 21 | 156 |
| -----TTCTTGGACTGGCACTGGTG-----     | mirL | 20 | 102 |
| -----TTCTTGGACTGGCACTGGTGAG-----   | mirL | 22 | 85  |
| -----TTCTTGGACTGGCACTGGTGAGT-----  | mirL | 23 | 46  |
| -----TTCTTGGACTGGCACTGG-----       | mirL | 18 | 37  |
| -----TTCTTGGACTGGCACTGGT-----      | mirL | 19 | 35  |
| -----TCTTGGACTGGCACTGGTG-----      | mirL | 19 | 11  |
| -----CTTGGACTGGCACTGGTGA-----      | mirL | 19 | 7   |
| -----TCTTGGACTGGCACTGGTGAGT-----   | mirL | 22 | 7   |
| -----TTCTTGGACTGGCACTGGTGAGTT----- | mirL | 24 | 5   |
| -----TCTTGGACTGGCACTGGTGAG-----    | mirL | 21 | 5   |
| -----CTTGGACTGGCACTGGTGAG-----     | mirL | 20 | 4   |
| -----TTGGACTGGCACTGGTGAG-----      | mirL | 19 | 4   |
| -----TCTTGGACTGGCACTGGTGA-----     | mirL | 20 | 3   |
| -----TCTTGGACTGGCACTGGT-----       | mirL | 18 | 2   |
| -----TTGGACTGGCACTGGTGAGT-----     | mirL | 20 | 2   |
| -----TCTTGGACTGGCACTGGTGAGTTA----- | mirL | 24 | 1   |
| -----CTTCTTGGACTGGCACTG-----       | mirL | 18 | 1   |
| -----CTTGGACTGGCACTGGTG-----       | mirL | 18 | 1   |
| -----CTTGGACTGGCACTGGTGAGT-----    | mirL | 21 | 1   |
| -----AACCAGTACCTTTCTGAGAA-----     | mirR | 20 | 233 |
| -----AACCAGTACCTTTCTGAGAAG-----    | mirR | 21 | 213 |
| -----AACCAGTACCTTTCTGAGAAGA-----   | mirR | 22 | 121 |
| -----AACCAGTACCTTTCTGAGA-----      | mirR | 19 | 78  |
| -----AACCAGTACCTTTCTGAG-----       | mirR | 18 | 28  |
| -----CCAGTACCTTTCTGAGAA-----       | mirR | 18 | 13  |
| -----ACCAGTACCTTTCTGAGA-----       | mirR | 18 | 13  |
| -----ACCAGTACCTTTCTGAGAAGA-----    | mirR | 21 | 13  |
| -----AACCAGTACCTTTCTGAGAAGAG-----  | mirR | 23 | 11  |
| -----ACCAGTACCTTTCTGAGAAG-----     | mirR | 20 | 9   |
| -----ACCAGTACCTTTCTGAGAA-----      | mirR | 19 | 8   |
| -----CCAGTACCTTTCTGAGAAG-----      | mirR | 19 | 6   |
| -----CCAGTACCTTTCTGAGAAGA-----     | mirR | 20 | 5   |
| -----CAGTACCTTTCTGAGAAGA-----      | mirR | 19 | 4   |
| -----CAGTACCTTTCTGAGAAG-----       | mirR | 18 | 4   |
| -----AACCAGTACCTTTCTGAGAAGAGT----- | mirR | 24 | 3   |
| -----CAACCAGTACCTTTCTGA-----       | mirR | 18 | 1   |
| -----CAACCAGTACCTTTCTGAGAA-----    | mirR | 21 | 1   |
| -----CCAGTACCTTTCTGAGAAGAG-----    | mirR | 21 | 1   |
| -----AGTAAAGCTCATCACATTCTTT-----   | morR | 22 | 1   |
| -----TAAAGCTCATCACATTCT-----       | morR | 18 | 1   |
| -----AAGAGTAAAGCTCATCAC-----       | morR | 18 | 1   |

>mmu-mir-1894

GGTCTAAACAGTCTTTGTTCTCTCTCCCTACCACCTGCCTCTCCCTGCTGTGGAGCAGGCAAGGGAGAGGGTGAAGGGAGGCCAGCCAGTGAGGATTTT species len reads

```

-GTCTAACAGTCTTTGTT----- morL 18 1
----AAACAGTCTTTGTTCTC----- morL 19 1
GGTCTAACAGTCTTTGTT----- morL 20 1
---CTAACAGTCTTTGTTCT----- morL 18 1
GGTCTAACAGTCTTTGTT----- morL 18 1
----TAAACAGTCTTTGTTCTC----- morL 18 1
--TCTAACAGTCTTTGTTCT----- morL 19 1
-----CTCTCCCCTACCACCTGCCTCT----- mirL 22 101
-----CTCTCCCCTACCACCTGCCTC----- mirL 21 25
-----CTCTCCCCTACCACCTGCCTCT----- mirL 23 17
-----CTCTCCCCTACCACCTGCCT----- mirL 20 9
-----CTCTCCCCTACCACCTGCCTCTC----- mirL 24 8
-----TCTCTCCCCTACCACCTG----- mirL 18 7
-----TCTCCCCTACCACCTGCCTCT----- mirL 21 6
-----CTCCCCTACCACCTGCCT----- mirL 18 2
-----CTCTCTCCCCTACCACCTG----- mirL 19 1
-----TCTCTCTCCCCTACCACCTG----- mirL 20 1
-----TCTCCCCTACCACCTGCCTCTC----- mirL 23 1
-----TCTCTCCCCTACCACCTGC----- mirL 19 1
-----CTCTCCCCTACCACCTGCC----- mirL 19 1
-----CTCCCCTACCACCTGCCTC----- mirL 19 1
-----TCCCCTACCACCTGCCTCT----- mirL 19 1
-----TCTCTCCCCTACCACCTGCCTCTC----- mirL 25 1
-----TCTCCCCTACCACCTGCC----- mirL 18 1
-----TCTCCCCTACCACCTGCCT----- mirL 19 1
-----TCCCCTACCACCTGCCTC----- mirL 18 1
-----TCCCCTGCTGTGGAGCAGGC----- loop 19 6
-----CCCTGCTGTGGAGCAGGC----- loop 18 2
-----TCCCTGCTGTGGAGCAGGCA----- loop 20 1
-----TCTTCCCCTGCTGTGGAGC----- loop 18 1
-----TCCCTGCTGTGGAGCAGG----- loop 18 1
-----TCTTCCCCTGCTGTGGAGCA----- loop 19 1
-----GCAAGGGAGAGGGTGAAGGGAG----- mirR 22 508
-----GCAAGGGAGAGGGTGAAGGGAGG----- mirR 23 351
-----GCAAGGGAGAGGGTGAAGGGA----- mirR 21 76
-----GCAAGGGAGAGGGTGAAG----- mirR 18 45
-----GCAAGGGAGAGGGTGAAGGGAGGG----- mirR 24 34
-----GCAAGGGAGAGGGTGAAGGG----- mirR 20 18
-----GCAAGGGAGAGGGTGAAGGGAGGGCC----- mirR 26 15
-----AGGGAGAGGGTGAAGGGAG----- mirR 19 4
-----CAAGGGAGAGGGTGAAGGGAGG----- mirR 22 4
-----AAGGGAGAGGGTGAAGGGAGG----- mirR 21 3
-----GGCAAGGGAGAGGGTGAAGGGAGG----- mirR 24 3
-----AAGGGAGAGGGTGAAGGGAG----- mirR 20 3
-----CAAGGGAGAGGGTGAAGG----- mirR 18 2
-----GGCAAGGGAGAGGGTGAAGGGAG----- mirR 23 2

```

```

-----CAAGGGAGAGGGTGAAGGGAG----- mirR 21 2
-----GGCAAGGGAGAGGGTGAAG----- mirR 19 2
-----AGGCAAGGGAGAGGGTGA----- mirR 18 1
-----AGGGAGAGGGTGAAGGGAG----- mirR 20 1
-----GGCAAGGGAGAGGGTGAAGGGGA----- mirR 22 1
-----AAGGGAGAGGGTGAAGGGGA----- mirR 19 1
-----CAAGGGAGAGGGTGAAGGGAGGGCC----- mirR 25 1
-----AGGGAGAGGGTGAAGGGGA----- mirR 18 1
-----CCAGCCAGTGAGGATTTT morR 18 1

>mmu-mir-683-1
AAGTCCAGCTGGGAGGCTGCAGTGGACCCAGGCTAAAAGCCAAGCTTTTCTGCACTGCAGTGGATGCCTGCTGTAAGCTGTGTCTCCTGGGCTGCATGGAGCCC species len reads
AAGTCCAGCTGGGAGGCTGCA----- morL 21 2
-----CAGCTGGGAGGCTGCAGTG----- morL 19 1
-----GTGGACCCAGGCTAAAAG----- mirL 18 2
-----TGGACCCAGGCTAAAAGCCA----- mirL 20 1
-----CCTGCTGTAAGCTGTGTCTC----- mirR 21 817
-----CCTGCTGTAAGCTGTGTCTC----- mirR 20 287
-----CCTGCTGTAAGCTGTGTCTC----- mirR 22 45
-----TGCTGTAAGCTGTGTCTC----- mirR 19 31
-----CCTGCTGTAAGCTGTGTCTC----- mirR 19 23
-----CCTGCTGTAAGCTGTGTCTCCT----- mirR 23 16
-----CCTGCTGTAAGCTGTGTCTC----- mirR 18 15
-----GCTGTAAGCTGTGTCTC----- mirR 18 10
-----CTGCTGTAAGCTGTGTCTC----- mirR 20 7
-----TGCTGTAAGCTGTGTCTC----- mirR 18 2
-----CCTGCTGTAAGCTGTGTCTCCTGGGCT----- mirR 28 2
-----GCCTGCTGTAAGCTGTGTCTC----- mirR 19 1
-----GCTGTAAGCTGTGTCTCCT----- mirR 20 1
-----CTGCTGTAAGCTGTGTCTC----- mirR 19 1
-----GCTGTAAGCTGTGTCTC----- mirR 19 1
-----CTGGGCTGCATGGAGCCC morR 18 1

>mmu-mir-683-2
AAGTCCAGCTGGGAGGCTGCAGTGGACCCAGGCTAAAAGCCAAGCTTTTCTGCACTGCAGTGGATGCCTGCTGTAAGCTGTGTCTCCTGGGCTGCATGGAGCCC species len reads
AAGTCCAGCTGGGAGGCTGCA----- morL 21 2
-----CAGCTGGGAGGCTGCAGTG----- morL 19 1
-----GTGGACCCAGGCTAAAAG----- mirL 18 2
-----TGGACCCAGGCTAAAAGCCA----- mirL 20 1
-----CCTGCTGTAAGCTGTGTCTC----- mirR 21 817
-----CCTGCTGTAAGCTGTGTCTC----- mirR 20 287
-----CCTGCTGTAAGCTGTGTCTC----- mirR 22 45
-----TGCTGTAAGCTGTGTCTC----- mirR 19 31
-----CCTGCTGTAAGCTGTGTCTC----- mirR 19 23
-----CCTGCTGTAAGCTGTGTCTCCT----- mirR 23 16
-----CCTGCTGTAAGCTGTGTCTC----- mirR 18 15

```

```

-----GCTGTAAGCTGTGTCCTC----- mirR 18 10
-----CTGCTGTAAGCTGTGTCCTC----- mirR 20 7
-----TGCTGTAAGCTGTGTCCT----- mirR 18 2
-----CCTGCTGTAAGCTGTGTCCTCCTGGGCT----- mirR 28 2
-----GCCTGCTGTAAGCTGTGTC----- mirR 19 1
-----GCTGTAAGCTGTGTCCTCCT----- mirR 20 1
-----CTGCTGTAAGCTGTGTCCT----- mirR 19 1
-----GCTGTAAGCTGTGTCCTCC----- mirR 19 1
-----CTGGGCTGCATGGAGCCC morR 18 1

>mmu-mir-3060
GATGCTGGTGATGTCCTGGGCGTGGGGGTGGGGAGTGCTTCGTGCTTCTGTTGAAGAGAAAATGACCATAGCACAGAAGCACTCCCACCAGCTTTGTCTGTGGCTTCAG species len reads
-----CTGGTGATGTCCTGGGCG----- morL 18 1
GATGCTGGTGATGTCCT----- morL 18 1
---TGCTGGTGATGTCCTGGG----- morL 18 1
---GCTGGTGATGTCCTGGG----- morL 18 1
-----CGTGGGGGTGGGGAGTGC----- mirL 18 3
-----GGGCGTGGGGGTGGGGAG----- mirL 18 3
-----GGCGTGGGGGTGGGGAGTGC----- mirL 20 1
-----GCGTGGGGGTGGGGAGTG----- mirL 18 1
-----GGGCGTGGGGGTGGGGAGTG----- mirL 20 1
-----TGGGGGTGGGGAGTGCTTC----- mirL 19 1
-----ATAGCACAGAAGCACTCCCACC----- mirR 22 316
-----CCATAGCACAGAAGCACTCCCACC----- mirR 23 182
-----CCATAGCACAGAAGCACTCCCA----- mirR 22 155
-----ATAGCACAGAAGCACTCCCACCA----- mirR 23 87
-----CCATAGCACAGAAGCACTCCC----- mirR 21 86
-----CCATAGCACAGAAGCACTCCCACC----- mirR 24 64
-----ATAGCACAGAAGCACTCCCACC----- mirR 21 58
-----CATAGCACAGAAGCACTCCCACC----- mirR 23 56
-----CATAGCACAGAAGCACTCCCACC----- mirR 22 47
-----ATAGCACAGAAGCACTCCC----- mirR 19 31
-----CATAGCACAGAAGCACTCCCA----- mirR 21 28
-----CCATAGCACAGAAGCACTCC----- mirR 20 25
-----ATAGCACAGAAGCACTCC----- mirR 18 22
-----ATAGCACAGAAGCACTCCCA----- mirR 20 17
-----CATAGCACAGAAGCACTCC----- mirR 19 13
-----CATAGCACAGAAGCACTCCCACCA----- mirR 24 11
-----CCATAGCACAGAAGCACTC----- mirR 19 11
-----CATAGCACAGAAGCACTCCC----- mirR 20 9
-----CCATAGCACAGAAGCACT----- mirR 18 7
-----CATAGCACAGAAGCACTC----- mirR 18 6
-----ATAGCACAGAAGCACTCCCACCAG----- mirR 24 6
-----GCACAGAAGCACTCCCACC----- mirR 19 2
-----AGCACAGAAGCACTCCCACC----- mirR 19 2
-----TAGCACAGAAGCACTCCCACC----- mirR 21 1

```

C:\Documents and Settings\hong\Desktop\Hippocampus-total RNA.txt

```
-----ACCATAGCACAGAAGCACTCCCA----- mirR 23 1
-----AGCACAGAAGCACTCCCA----- mirR 18 1
-----ACCATAGCACAGAAGCACTC----- mirR 20 1
-----AGCTTTGTCTGTGGCTTC-- morR 18 1
-----AGCTTTGTCTGTGGCTTCA- morR 19 1
-----CTTTGTCTGTGGCTTCAG morR 18 1
-----GCTTTGTCTGTGGCTTCAG morR 19 1
```

>mmu-mir-297b

```
TATTTGCTTGTGTATATGTATGTGTCATGAACATGTGTATATGAATATACATACATACACACATACCCATACAAACATGCATACAAACACACAGAAAA species len reads
TATTTGCTTGTGTATATA----- morL 18 1
TATTTGCTTGTGTATAT----- morL 19 1
-----ATGTATGTGTCATGAACATGT----- mirL 22 788
-----ATGTATGTGTCATGAACATGTG----- mirL 23 189
-----ATGTATGTGTCATGAACATG----- mirL 21 82
-----ATGTATGTGTCATGAACAT----- mirL 20 53
-----ATGTATGTGTCATGAACATGTGT----- mirL 24 24
-----GTATGTGTCATGAACATGT----- mirL 20 22
-----ATGTATGTGTCATGAACA----- mirL 19 21
-----ATGTATGTGTCATGAAC----- mirL 18 15
-----TGTATGTGTCATGAACATGT----- mirL 21 12
-----GTATGTGTCATGAACATGTG----- mirL 21 9
-----TATGTGTCATGAACATGT----- mirL 19 6
-----TGTATGTGTCATGAACATGTG----- mirL 22 6
-----TATGTATGTGTCATGAACATGT----- mirL 23 5
-----GTATGTGTCATGAACATG----- mirL 19 4
-----TATGTATGTGTCATGAACAT----- mirL 21 3
-----GTATGTGTCATGAACAT----- mirL 18 3
-----ATATGTATGTGTCATGAA----- mirL 19 2
-----TGTATGTGTCATGAACATG----- mirL 20 2
-----TATGTATGTGTCATGAA----- mirL 18 1
-----TGTATGTGTCATGAACAT----- mirL 19 1
-----ATATGTATGTGTCATGAACAT----- mirL 22 1
-----TATATGTATGTGTCATGAAC----- mirL 21 1
-----TATGTGTCATGAACATGTG----- mirL 20 1
-----GTATGTGTCATGAACATGTGT----- mirL 22 1
-----TATATGTATGTGTCATGAACATGT----- mirL 25 1
-----TATGTATGTGTCATGAACATG----- mirL 22 1
-----TATGTGTCATGAACATGTGT----- mirL 21 1
-----CATACAAACACACAGAAA- mirR 18 1
-----ATACAAACACACAGAAAA mirR 18 1
```

>mmu-mir-1188

```
ACTCACAGTCTCCCAGCTGGTGTGAGGTTGGGCCAGGATGAAACCAAGGCTCTCCGAGGCTCCCCACCACACCCTGCTGCTGAAGACTGCCTAGCAA species len reads
--TCACAGTCTCCCAGCTGG----- morL 18 1
ACTCACAGTCTCCCAGCTG----- morL 19 1
```

```

-----TGGTGTGAGGTTGGGCCAGGAT----- mirL 22 330
-----TGGTGTGAGGTTGGGCCAGGA----- mirL 21 275
-----TGGTGTGAGGTTGGGCCAGG----- mirL 20 81
-----TGGTGTGAGGTTGGGCCAG----- mirL 19 64
-----TGGTGTGAGGTTGGGCCAGGATG----- mirL 23 64
-----TGGTGTGAGGTTGGGCCAGGATGA----- mirL 24 37
-----TGGTGTGAGGTTGGGCCA----- mirL 18 24
-----GGTGTGAGGTTGGGCCAGGAT----- mirL 21 11
-----GGTGTGAGGTTGGGCCAGGA----- mirL 20 7
-----GGTGTGAGGTTGGGCCAGG----- mirL 19 5
-----GTGTGAGGTTGGGCCAGGAT----- mirL 20 3
-----TGTGAGGTTGGGCCAGGA----- mirL 18 2
-----AGCTGGTGTGAGGTTGGGCCA----- mirL 21 2
-----GGTGTGAGGTTGGGCCAGGATGA----- mirL 23 1
-----AGCTGGTGTGAGGTTGGGC----- mirL 19 1
-----GTGTGAGGTTGGGCCAGGA----- mirL 19 1
-----TGTGAGGTTGGGCCAGGAT----- mirL 19 1
-----GGTGTGAGGTTGGGCCAGGATG----- mirL 22 1
-----ATGAAACCCAAGGCTCTC----- loop 18 3
-----AAACCCAAGGCTCTCCGA----- loop 18 1
-----CGAGGCTCCCCACCACACCCTGC----- mirR 23 60
-----TCCGAGGCTCCCCACCACACCC----- mirR 22 38
-----CGAGGCTCCCCACCACACCCTG----- mirR 22 33
-----TCCGAGGCTCCCCACCACACCCTGC----- mirR 25 23
-----TCCGAGGCTCCCCACCACACCCT----- mirR 23 22
-----CGAGGCTCCCCACCACACCCT----- mirR 21 18
-----TCCGAGGCTCCCCACCACACCCTG----- mirR 24 15
-----TCCGAGGCTCCCCACCACAC----- mirR 20 10
-----TCCGAGGCTCCCCACCAC----- mirR 18 8
-----TCCGAGGCTCCCCACCACA----- mirR 19 7
-----CGAGGCTCCCCACCACACCC----- mirR 20 7
-----CGAGGCTCCCCACCACACC----- mirR 19 6
-----CGAGGCTCCCCACCACACCCTGCT----- mirR 24 4
-----CCGAGGCTCCCCACCACAC----- mirR 19 3
-----CCGAGGCTCCCCACCACACCCTGC----- mirR 24 3
-----CCGAGGCTCCCCACCACACCCT----- mirR 22 2
-----CCGAGGCTCCCCACCACA----- mirR 18 2
-----GGCTCCCCACCACACCCTGCT----- mirR 21 2
-----CCGAGGCTCCCCACCACACCC----- mirR 21 2
-----GGCTCCCCACCACACCCT----- mirR 18 1
-----CCGAGGCTCCCCACCACACCCTG----- mirR 23 1
-----AGGCTCCCCACCACACCCTGC----- mirR 21 1
-----CCGAGGCTCCCCACCACACCCTGCT----- mirR 25 1
-----AGGCTCCCCACCACACCCT----- mirR 19 1
-----CGAGGCTCCCCACCACAC----- mirR 18 1
-----TGCTGAAGACTGCCTAGCAA morR 20 1

```

```
-----GCTGCTGAAGACTGCCTA---- morR 18 1

>mmu-mir-216b
TGGGAAATCTCTGCAGGCAAATGTGATGTCACCTGAAGAAACCACACACTTACCTGTAGAGATTCTTCAGTCTGACAACATCAAGCATCAAACCCCTTTATCAAGCAA species len reads
-GGGAAATCTCTGCAGGCAAATGTGA----- mirL 25 484
-GGGAAATCTCTGCAGGCAAATGT----- mirL 23 147
----AAATCTCTGCAGGCAAATGTGA----- mirL 22 126
----AAATCTCTGCAGGCAAAT----- mirL 18 99
-GGGAAATCTCTGCAGGCAAAT----- mirL 21 67
----AAATCTCTGCAGGCAAATGT----- mirL 20 60
-GGGAAATCTCTGCAGGCAAATGTG----- mirL 24 34
-GGGAAATCTCTGCAGGCAA----- mirL 20 29
-GGGAAATCTCTGCAGGCAAATGTGATGTC----- mirL 29 26
-GGGAAATCTCTGCAGGCAAATG----- mirL 22 20
--GAAATCTCTGCAGGCAAATGTGA----- mirL 24 12
----AAATCTCTGCAGGCAAATGTGAT----- mirL 23 10
----AAATCTCTGCAGGCAAATG----- mirL 19 9
----AAATCTCTGCAGGCAAATGTG----- mirL 21 8
--GAAATCTCTGCAGGCAAATGT----- mirL 22 4
--GAAATCTCTGCAGGCAAATGT----- mirL 21 3
--GAAATCTCTGCAGGCAAATGTG----- mirL 23 1
--GAAATCTCTGCAGGCAA----- mirL 18 1
--GAAATCTCTGCAGGCAAAT----- mirL 20 1
TGGGAAATCTCTGCAGGCAAAT----- mirL 22 1
TGGGAAATCTCTGCAGGCAAATGTGA----- mirL 26 1
----AAATCTCTGCAGGCAAATGTGATGTC----- mirL 26 1
--GAAATCTCTGCAGGCAA----- mirL 19 1
-----TGACAACATCAAGCATCA----- mirR 18 8
-----TGACAACATCAAGCATCAA----- mirR 20 2
-----GTCTGACAACATCAAGCA----- mirR 18 2
-----ACAACATCAAGCATCAA----- mirR 18 1
-----ACAACATCAAGCATCAAACC----- mirR 20 1
-----AACCCCTTTATCAAGCAA morR 18 2
-----CAAACCCCTTTATCAAGC-- morR 18 1

>mmu-mir-1186
TGAACCTCAGAAATCCACCTGTCTCTGCCTCCCGAGTGTGGAATTAAGGCATGCACCACCACTGCCCGGCGAGTTCTGTTATTTCTGAGTGTGAGAAATATATGGGGAAAAGTCTTCATGGTGAGTCCAAAGGCTTATAT
-----CACCTGTCTCTGCCTCCC-----
-----GAAATCCACCTGTCTCTGCCTCCC-----
-----AATCCACCTGTCTCTGCCTCC-----
-----AATCCACCTGTCTCTGCCTCCC-----
-----TCCACCTGTCTCTGCCTCCC-----
-----ACCTGTCTCTGCCTCCCG-----
-----TCCACCTGTCTCTGCCTC-----
-----TCCACCTGTCTCTGCCTCCCG-----
-----CCACCTGTCTCTGCCTCCC-----
```



-----GAAATCCACCTGTCTCTGCCTCC-----  
-----CCTGTCTCTGCCTCCCGA-----  
-----GAAATCCACCTGTCTCTGCCTCCCG-----  
-----CCACCTGTCTCTGCCTCC-----  
--AACTCAGAAATCCACCTGTCTCTGCCTCCCGA--  
-----ATCCACCTGTCTCTGCCTCCC-----  
-----AATCCACCTGTCTCTGCCT-----  
-----AGAAATCCACCTGTCTCTGCCTCCC-----  
-----CACCTGTCTCTGCCTCCCG-----  
-----GAAATCCACCTGTCTCTGCCTC-----  
-----ACCTGTCTCTGCCTCCCGAG-----  
-----ATCCACCTGTCTCTGCCTCC-----  
---CTCAGAAATCCACCTGTCTCTGCCTCCCG---  
TGAACTCAGAAATCCACCTGTCTCTGCCTC-----  
-----ATCCACCTGTCTCTGCCT-----  
-----AATCCACCTGTCTCTGCCTCCCG-----  
-----CACCTGTCTCTGCCTCCCGA-----  
-----GAAATCCACCTGTCTCTGCCT-----  
-----TCCACCTGTCTCTGCCTCC-----  
-----CACCTGTCTCTGCCTCCCGAG-----  
-----CCACCTGTCTCTGCCTCCCG-----  
-----AATCCACCTGTCTCTGCCTCCCGAG-----  
-----CCACCTGTCTCTGCCTCCCGA-----  
-----ATCCACCTGTCTCTGCCTC-----  
-----CCTGTCTCTGCCTCCCGAG-----  
-----ACCTGTCTCTGCCTCCCGA-----  
-----CCACCTGTCTCTGCCTCCCGAG-----  
-----GAGTGCTGGAATTAAGGCATG-----  
-----GAGTGCTGGAATTAAGGCATGC-----  
-----GAGTGCTGGAATTAAGGCAT-----  
-----GAGTGCTGGAATTAAGGCA-----  
-----GAGTGCTGGAATTAAGGCATGCA-----  
-----TGCTGGAATTAAGGCATG-----  
-----GAGTGCTGGAATTAAGGC-----  
-----GAGTGCTGGAATTAAGGCATGCACC-----  
-----AGTGCTGGAATTAAGGCATG-----  
-----CGAGTGCTGGAATTAAGGCATG-----  
-----AGTGCTGGAATTAAGGCAT-----  
-----GTGCTGGAATTAAGGCATG-----  
-----AGTGCTGGAATTAAGGCATGC-----  
-----GTGCTGGAATTAAGGCAT-----  
-----AGTGCTGGAATTAAGGCATGCA-----  
-----CGAGTGCTGGAATTAAGGCATGC-----



```

--TATTTAGAATGGTGCTGATCT----- mirL 21 91
--TATTTAGAATGGTGCTGATC----- mirL 20 33
--TATTTAGAATGGTGCTGAT----- mirL 19 29
--TATTTAGAATGGTGCTGA----- mirL 18 22
----TTAGAATGGTGCTGATCTG----- mirL 19 16
--TATTTAGAATGGTGCTGATCTGA----- mirL 23 12
--ATTTAGAATGGTGCTGATCT----- mirL 20 12
----TTTAGAATGGTGCTGATCTG----- mirL 20 11
----TTTAGAATGGTGCTGATCT----- mirL 19 6
----ATTTAGAATGGTGCTGAT----- mirL 18 6
----ATTTAGAATGGTGCTGATC----- mirL 19 4
----TTAGAATGGTGCTGATCT----- mirL 18 4
CCTATTTAGAATGGTGCTG----- mirL 19 2
----TTTAGAATGGTGCTGATCTGA----- mirL 21 2
----TTAGAATGGTGCTGATCTGA----- mirL 20 1
--ATTTAGAATGGTGCTGATCTGA----- mirL 22 1
-----AGATGAATGTTTCAGAATA-- mirR 18 3
-----ATGAATGTTTCAGAATATC mirR 18 1
-----TAGATGAATGTTTCAGAATA-- mirR 19 1

>mmu-mir-465b-2
CCTATTTAGAATGGTGCTGATCTGATGAAATAAAAAATTGATCAGGGCCTTTCTAAGTAGAGTAAGGCTTACCAACTATACATTTAATATGACTTGTAGATGAATGTTTCAGAATATC species len reads
--TATTTAGAATGGTGCTGATCTG----- mirL 22 680
--ATTTAGAATGGTGCTGATCTG----- mirL 21 107
--TATTTAGAATGGTGCTGATCT----- mirL 21 91
--TATTTAGAATGGTGCTGATC----- mirL 20 33
--TATTTAGAATGGTGCTGAT----- mirL 19 29
--TATTTAGAATGGTGCTGA----- mirL 18 22
----TTAGAATGGTGCTGATCTG----- mirL 19 16
--TATTTAGAATGGTGCTGATCTGA----- mirL 23 12
--ATTTAGAATGGTGCTGATCT----- mirL 20 12
----TTTAGAATGGTGCTGATCTG----- mirL 20 11
----TTTAGAATGGTGCTGATCT----- mirL 19 6
----ATTTAGAATGGTGCTGAT----- mirL 18 6
----ATTTAGAATGGTGCTGATC----- mirL 19 4
----TTAGAATGGTGCTGATCT----- mirL 18 4
CCTATTTAGAATGGTGCTG----- mirL 19 2
----TTTAGAATGGTGCTGATCTGA----- mirL 21 2
----TTAGAATGGTGCTGATCTGA----- mirL 20 1
--ATTTAGAATGGTGCTGATCTGA----- mirL 22 1
-----AGATGAATGTTTCAGAATA-- mirR 18 3
-----ATGAATGTTTCAGAATATC mirR 18 1
-----TAGATGAATGTTTCAGAATA-- mirR 19 1

>mmu-mir-1960
CCCAAGGTCACAGAGTGAGCAGCCAGTGCTGTTAGAAGAGGGCTGAGAGCAGGGAGAGCTCTCTTCTGCAGCACTGACTTTTCCTCTGCATTGGCAC species len reads

```

```

-----TCACAGAGTGAGCAGCCA----- morL 18 1
CCCAAGGTCACAGAGTGAGC----- morL 20 1
-----AGGTCACAGAGTGAGCAG----- morL 18 1
---AAGGTCACAGAGTGAGCAGCC----- morL 21 1
-----CCAGTGCTGTTAGAAGAGGGCT----- mirL 22 575
-----CCAGTGCTGTTAGAAGAGGGCTG----- mirL 23 218
-----CCAGTGCTGTTAGAAGAGGGC----- mirL 21 90
-----CAGTGCTGTTAGAAGAGGGCT----- mirL 21 20
-----GTGCTGTTAGAAGAGGGCT----- mirL 19 15
-----AGTGCTGTTAGAAGAGGGCT----- mirL 20 14
-----CCAGTGCTGTTAGAAGAG----- mirL 18 13
-----CAGTGCTGTTAGAAGAGGGC----- mirL 20 12
-----CCAGTGCTGTTAGAAGAGGG----- mirL 20 10
-----CCAGTGCTGTTAGAAGAGGGCTGA----- mirL 24 10
-----CCAGTGCTGTTAGAAGAGG----- mirL 19 7
-----GTGCTGTTAGAAGAGGGC----- mirL 18 4
-----CAGTGCTGTTAGAAGAGGGCTG----- mirL 22 2
-----AGTGCTGTTAGAAGAGGGCTG----- mirL 21 2
-----GCCAGTGCTGTTAGAAGAGGGCT----- mirL 23 1
-----AGTGCTGTTAGAAGAGGGC----- mirL 19 1
-----GTGCTGTTAGAAGAGGGCTG----- mirL 20 1
-----CTCTCTTCTGCAGCACTGAC----- mirR 20 3
-----CTCTCTTCTGCAGCACTGACT----- mirR 21 2
-----CTCTCTTCTGCAGCACTGA----- mirR 19 1
-----GCTCTCTTCTGCAGCACTGA----- mirR 20 1
-----CTCTTCTGCAGCACTGAC----- mirR 18 1
-----TCTCTTCTGCAGCACTGACTTT----- mirR 22 1
-----GCTCTCTTCTGCAGCACT----- mirR 18 1
-----TCTTCTGCAGCACTGACT----- mirR 18 1
-----GAGCTCTCTTCTGCAGCA----- mirR 18 1
-----TTTCCTCTGCATTGGCAC morR 18 2

```

>mmu-mir-1905

```

TGATGATGTACGTGTTGGTCTGCTGCTGGATGCGTTTTGATGGTCGCTCCCTTGGGGCCACCACCAGTCCCACCACGCGGTAGGGTACT species len reads
TGATGATGTACGTGTTGG----- morL 18 194
-----TGGTCTGCTGCTGGATGCG----- mirL 19 1
-----GTCTGCTGCTGGATGCGTT----- mirL 19 1
-----CACCAGTCCCACCACGCGGTAG----- mirR 22 484
-----CACCAGTCCCACCACGCGGTAGG----- mirR 23 144
-----CACCAGTCCCACCACGCGGTA----- mirR 21 68
-----CACCAGTCCCACCACGCGGT----- mirR 20 27
-----CAGTCCCACCACGCGGTAG----- mirR 19 16
-----CACCAGTCCCACCACGCGG----- mirR 19 12
-----ACCAGTCCCACCACGCGGTAG----- mirR 21 11
-----CACCAGTCCCACCACGCGGTAGGG----- mirR 24 9
-----CAGTCCCACCACGCGGTAGG----- mirR 20 6

```

```

-----ACCAGTCCCACCACGCGGTAGG----- mirR 22 5
-----CACCAGTCCCACCACGCG----- mirR 18 4
-----CCAGTCCCACCACGCGGTAGG----- mirR 21 4
-----ACCAGTCCCACCACGCGGTA----- mirR 20 4
-----CAGTCCCACCACGCGGTA----- mirR 18 4
-----CCAGTCCCACCACGCGGTAG----- mirR 20 3
-----CCAGTCCCACCACGCGGT----- mirR 18 3
-----CCAGTCCCACCACGCGGTA----- mirR 19 2
-----CCACCAGTCCCACCACGCGGTAGG----- mirR 24 2
-----CCACCAGTCCCACCACGCGGTAG----- mirR 23 1
-----CCACCAGTCCCACCACGCGGTAGGGTACT mirR 29 1
-----ACCAGTCCCACCACGCGGT----- mirR 19 1
-----ACCAGTCCCACCACGCGGTAGGGTAC- mirR 26 1
-----ACCAGTCCCACCACGCGG----- mirR 18 1

```

>mmu-mir-694

```

AGCTCAGGCATCGCTTTCAACCCAAGACCAGGCTGAAAAATGTTGCCTGAAGCAGTCTCTGCCTTCTGCTTTC species len reads
---TCAGGCATCGCTTTCAAC----- mirL 18 9
AGCTCAGGCATCGCTTTCAACC----- mirL 22 4
---TCAGGCATCGCTTTCAACC----- mirL 19 3
AGCTCAGGCATCGCTTTCAAC----- mirL 21 1
--CTCAGGCATCGCTTTCAA----- mirL 18 1
---TCAGGCATCGCTTTCAACCC----- mirL 20 1
AGCTCAGGCATCGCTTTCAA----- mirL 20 1
-----CTGAAAAATGTTGCCTGAA----- mirR 18 557
-----CTGAAAAATGTTGCCTGAAG----- mirR 19 221
-----CTGAAAAATGTTGCCTGAAGC----- mirR 20 115
-----CTGAAAAATGTTGCCTGAAGCA----- mirR 21 13
-----TGAAAAATGTTGCCTGAAG----- mirR 18 7
-----GAAAAATGTTGCCTGAAGC----- mirR 18 5
-----CTGAAAAATGTTGCCTGAAGCAGTCTC----- mirR 26 3
-----GCTGAAAAATGTTGCCTGA----- mirR 18 2
-----CTGAAAAATGTTGCCTGAAGCAGT----- mirR 23 2
-----CTGAAAAATGTTGCCTGAAGCAGTCT----- mirR 25 2
-----TGAAAAATGTTGCCTGAAGCAGTCT----- mirR 24 1
-----GCTGAAAAATGTTGCCTGAA----- mirR 19 1
-----TGAAAAATGTTGCCTGAAGCA----- mirR 20 1
-----TGAAAAATGTTGCCTGAAGC----- mirR 19 1
-----AGTCTCTGCCTTCTGCTTTC morR 20 3
-----GCAGTCTCTGCCTTCTGC---- morR 18 2
-----GTCTCTGCCTTCTGCTTT- morR 18 1
-----GAAGCAGTCTCTGCCTTC----- morR 18 1

```

>mmu-mir-1-2-as

```

CGGACATTACCTACCCAAAATACATACTTCTTTACATTCCATAGCACTGAATGTTTCATATGGGTACATAAAGAAGTATGTGCTCTGAGTAGGCACTCCTGCGCCGCGGATAGCTGTGAAAACATGAAGCAGCCCACC sp
---ACATTACCTACCCAAAAT----- mo

```

```
-GGACATTACCTACCCAAAA----- mo
CGGACATTACCTACCCAA----- mo
-----TACATACTTCTTTACATTCCA----- mi
-----TACATACTTCTTTACATTCC----- mi
-----ACATACTTCTTTACATTCCA----- mi
-----TACATACTTCTTTACATTTC----- mi
-----TACATACTTCTTTACATTCCAT----- mi
-----AATACATACTTCTTTACATTCC----- mi
-----ATACATACTTCTTTACATTCCA----- mi
-----TACATACTTCTTTACATTCCATA----- mi
-----ATACTTCTTTACATTCCA----- mi
-----ACATACTTCTTTACATTCCAT----- mi
-----ACATACTTCTTTACATTCC----- mi
-----ACATACTTCTTTACATTTC----- mi
-----AATACATACTTCTTTACATTTC----- mi
-----ATACATACTTCTTTACATTCC----- mi
-----TACATACTTCTTTACATT----- mi
-----CATACTTCTTTACATTCCA----- mi
-----ATACATACTTCTTTACATTTC----- mi
-----TACATACTTCTTTACATTCCATAG----- mi
-----ACATACTTCTTTACATTCCATAG----- mi
-----AAATACATACTTCTTTACATTCC----- mi
-----CATACTTCTTTACATTCCATA----- mi
-----CATACTTCTTTACATTCC----- mi
-----AAATACATACTTCTTTACA----- mi
-----CATACTTCTTTACATTCCATAG----- mi
-----ACATACTTCTTTACATTCCATA----- mi
-----AATACATACTTCTTTACATT----- mi
-----AAATACATACTTCTTTACAT----- mi
-----AAATACATACTTCTTTAC----- mi
-----CATACTTCTTTACATTCCAT----- mi
-----ATACATACTTCTTTACATTCCAT----- mi
-----AATACATACTTCTTTACATTCCA----- mi
-----AATACATACTTCTTTACAT----- mi
-----AAATACATACTTCTTTACATTC----- mi
-----AAACATGAAGCAGCCCAC----- mi
-----AAACATGAAGCAGCCCACC----- mi
-----AAAACATGAAGCAGCCCACC----- mi
-----AAAACATGAAGCAGCCCAC----- mi
-----GAAAACATGAAGCAGCCC----- mi
-----AACATGAAGCAGCCCACC----- mi
-----TGAAAACATGAAGCAGCC----- mi
```

```
>mmu-mir-1969
CCCTGATAGTGCTAGAGGCTGAAGATGGAGACTTTAACATGGGTGCTCTTAAAATCTGTTAACATCCATGCTGCCTCCATTTCTGGTCTGTAGACATCACAGCACCCAGAGGAAGGAACCTGTAAACAT species len
CCCTGATAGTGCTAGAGGC----- morL 19 3
```

```

CCCTGATAGTGCTAGAGG----- mirL 18 1
-----AAGATGGAGACTTTAACATGGGT----- mirL 23 339
-----AAGATGGAGACTTTAACATG----- mirL 20 133
-----AAGATGGAGACTTTAACATGGGTG----- mirL 24 131
-----AAGATGGAGACTTTAACATGG----- mirL 21 92
-----AAGATGGAGACTTTAACATGGG----- mirL 22 78
-----AAGATGGAGACTTTAACATGGGTGC----- mirL 25 47
-----AGATGGAGACTTTAACATGGGT----- mirL 22 15
-----AAGATGGAGACTTTAACAT----- mirL 18 14
-----AGATGGAGACTTTAACATGGGTG----- mirL 23 9
-----GATGGAGACTTTAACATG----- mirL 18 8
-----AGATGGAGACTTTAACATG----- mirL 19 7
-----AGATGGAGACTTTAACATGGGTGC----- mirL 24 7
-----GATGGAGACTTTAACATGG----- mirL 19 6
-----ATGGAGACTTTAACATGGGT----- mirL 20 5
-----GATGGAGACTTTAACATGGGT----- mirL 21 5
-----ATGGAGACTTTAACATGGG----- mirL 19 2
-----AGATGGAGACTTTAACAT----- mirL 18 2
-----AGATGGAGACTTTAACATGG----- mirL 20 1
-----GATGGAGACTTTAACATGGGTG----- mirL 22 1
-----GATGGAGACTTTAACATGGG----- mirL 20 1
-----AGATGGAGACTTTAACATGGG----- mirL 21 1
-----CTGAAGATGGAGACTTTA----- mirL 18 1
-----GTAGACATCACAGCACCA----- mirR 19 7
-----GTAGACATCACAGCACCC----- mirR 18 1
-----AGACATCACAGCACCCAGA----- mirR 19 1
-----CTGTAGACATCACAGCAC----- mirR 18 1
-----AGACATCACAGCACCCAG----- mirR 18 1
-----TGTAGACATCACAGCACC----- mirR 18 1
-----AGGAAGGAACTTGTAACA----- morR 18 2
-----CAGAGGAAGGAACTTGTA----- morR 18 1
-----GGAAGGAACTTGTAACAT----- morR 18 1
-----AGAGGAAGGAACTTGTA----- morR 18 1
-----CAGAGGAAGGAACTTGTAAC----- morR 20 1
-----GAGGAAGGAACTTGTAAC----- morR 18 1
-----CAGAGGAAGGAACTTGTAACA----- morR 21 1

```

>mmu-mir-1932

```

TGTTC AAGTTTCGGTTTCACTGCAGGCAGCCGGTCCAGCCTGGCCCTGAGTCTCCGACCCATTA ACTCTCGGGTTGCGGACAGCGCTAGGTCGGCCCTGCTCCCCAGCAACACCC species len reads
-----AAGTTTCGGTTTCACTGCA----- morL 19 1
TGTTC AAGTTTCGGTTTTCAC----- morL 21 1
-----GCAGGCAGCCGGTCCAGC----- mirL 18 3
-----ACTGCAGGCAGCCGGTCC----- mirL 18 1
-----AGGCAGCCGGTCCAGCCTG----- mirL 19 1
-----GTTGCGGACAGCGCTAGGTCGG----- mirR 22 540
-----GTTGCGGACAGCGCTAGGTCG----- mirR 21 164

```

```

-----GTTGCGGACAGCGCTAGGTCGGC----- mirR 23 74
-----GTTGCGGACAGCGCTAGGT----- mirR 19 53
-----GTTGCGGACAGCGCTAGGTC----- mirR 20 34
-----GTTGCGGACAGCGCTAGG----- mirR 18 17
-----GTTGCGGACAGCGCTAGGTCGGCC----- mirR 25 10
-----GCGGACAGCGCTAGGTCGG----- mirR 19 4
-----TGCGGACAGCGCTAGGTCG----- mirR 19 3
-----TTGCGGACAGCGCTAGGT----- mirR 18 2
-----GCGGACAGCGCTAGGTCG----- mirR 18 2
-----GCGGACAGCGCTAGGTCGGC----- mirR 20 1
-----TGCGGACAGCGCTAGGTCGGC----- mirR 21 1
-----GGTTGCGGACAGCGCTAGGTCGGC----- mirR 24 1
-----GCGGACAGCGCTAGGTCGGCC----- mirR 21 1
-----TTGCGGACAGCGCTAGGTCG----- mirR 20 1
-----TTGCGGACAGCGCTAGGTCGG----- mirR 21 1
-----GGTTGCGGACAGCGCTAGGTCGG----- mirR 23 1
-----TGCGGACAGCGCTAGGTCGG----- mirR 20 1
-----GCCCTGCTCCCCAGCAACA--- morR 19 3
-----CCCTGCTCCCCAGCAACAC-- morR 19 2
-----CCTGCTCCCCAGCAACAC-- morR 18 2
-----GCCCTGCTCCCCAGCAAC--- morR 18 1
-----GCCCTGCTCCCCAGCAACAC-- morR 20 1
-----GCCCTGCTCCCCAGCAACACCC morR 22 1

```

>mmu-mir-1929

| sequence                                                                                                           | species | len | reads |
|--------------------------------------------------------------------------------------------------------------------|---------|-----|-------|
| TCTTCTAGGACTTTATAGAGCAGAGGTTTGCAGCCTGTGACACTCAGCTCATGGAGACCTAGGTGGCCTTGGGTTCTGAGCACAGAGACTTGGAAATATGTCTCAGTCATCCGT | mirL 20 | 333 |       |
| --TTCTAGGACTTTATAGAGCA-----                                                                                        | mirL 22 | 169 |       |
| --TTCTAGGACTTTATAGAGCAGA-----                                                                                      | mirL 21 | 162 |       |
| --TTCTAGGACTTTATAGAGCAG-----                                                                                       | mirL 23 | 39  |       |
| --CTAGGACTTTATAGAGCAG-----                                                                                         | mirL 19 | 28  |       |
| --TCTAGGACTTTATAGAGCA-----                                                                                         | mirL 19 | 26  |       |
| --TTCTAGGACTTTATAGAGC-----                                                                                         | mirL 19 | 22  |       |
| --TAGGACTTTATAGAGCAG-----                                                                                          | mirL 18 | 20  |       |
| --TCTAGGACTTTATAGAGCAGA-----                                                                                       | mirL 21 | 19  |       |
| --TCTAGGACTTTATAGAGCAG-----                                                                                        | mirL 20 | 16  |       |
| --CTAGGACTTTATAGAGCAGA-----                                                                                        | mirL 20 | 11  |       |
| --CTAGGACTTTATAGAGCA-----                                                                                          | mirL 18 | 9   |       |
| --TTCTAGGACTTTATAGAG-----                                                                                          | mirL 18 | 8   |       |
| --TAGGACTTTATAGAGCAGAG-----                                                                                        | mirL 20 | 7   |       |
| --TTCTAGGACTTTATAGAGCAGAG-----                                                                                     | mirL 24 | 7   |       |
| --TAGGACTTTATAGAGCAGA-----                                                                                         | mirL 19 | 6   |       |
| --TCTAGGACTTTATAGAGCAGAG-----                                                                                      | mirL 22 | 6   |       |
| --TCTAGGACTTTATAGAGC-----                                                                                          | mirL 18 | 6   |       |
| --CTAGGACTTTATAGAGCAGAG-----                                                                                       | mirL 21 | 5   |       |
| -CTTCTAGGACTTTATAGAGCA-----                                                                                        | mirL 21 | 1   |       |



```
---TCTAGGACTTTATAGAGCAGAGG----- mirL 23 1
TCTTCTAGGACTTTATAGAGCA----- mirL 22 1
-----AGCACCAGACAGGACTTGG----- mirR 19 14
-----GAGCACCAGACAGGACTTGG----- mirR 20 3
-----CTGAGCACCAGACAGGACT----- mirR 19 1
-----GAGCACCAGACAGGACTT----- mirR 18 1
-----TGAGCACCAGACAGGACT----- mirR 18 1
-----TATGTCTCAGTCATCCGT morR 18 1
-----TGGAATATGTCTCAGTCAT--- morR 19 1
```

>mmu-mir-1940

```
GGGAGCCAGGATGCAGCCTGCTATGGAGGACTGAGAAGGTGGAGCAGTTCTGTACCGTGTGCCTTCCATTGGTTAAGACCTCCAACAGTAAAGGGCTGGCCGGCCAAAGAATGTCCTCTCTATCACCGTGGAGGGGCAGC
---AGGATGCAGCCTGCTATG-----
--GAGCCAGGATGCAGCCTG-----
---CCAGGATGCAGCCTGCTA-----
GGGAGCCAGGATGCAGCCTG-----
GGGAGCCAGGATGCAGCCT-----
--GAGCCAGGATGCAGCCTGC-----
--GGAGCCAGGATGCAGCCT-----
-----ATGGAGGACTGAGAAGGTGGAGCAGTT-----
-----ATGGAGGACTGAGAAGGTGGAGCAGTTC-----
-----ATGGAGGACTGAGAAGGTGGAGCAG-----
-----ATGGAGGACTGAGAAGGTGGAGCAGT-----
-----ATGGAGGACTGAGAAGGTGGAGCA-----
-----GGAGGACTGAGAAGGTGGAGCAGTT-----
-----ATGGAGGACTGAGAAGGTGGAG-----
-----GAGGACTGAGAAGGTGGAGCAGTT-----
-----ATGGAGGACTGAGAAGGTGGAGCAGTTCT-----
-----TGGAGGACTGAGAAGGTGGAGCAGTT-----
-----TGGAGGACTGAGAAGGTGGAGCAGT-----
-----GAGGACTGAGAAGGTGGA-----
-----GGAGGACTGAGAAGGTGGAGCAGTTC-----
-----TGGAGGACTGAGAAGGTGGAGCAG-----
-----GAGGACTGAGAAGGTGGAGCAGTTC-----
-----GGAGGACTGAGAAGGTGGAGCAGT-----
-----GGAGGACTGAGAAGGTGGAGCAG-----
-----TATGGAGGACTGAGAAGGTGGAGCAGTT-----
-----GAGGACTGAGAAGGTGGAGCAG-----
-----TATGGAGGACTGAGAAGGTGGAGCAGT-----
-----TATGGAGGACTGAGAAGGTGGAGCAGTTC-----
-----GGAGGACTGAGAAGGTGGAGCA-----
-----TATGGAGGACTGAGAAGGTGGA-----
-----GAGGACTGAGAAGGTGGAGCAGTTCT-----
-----TGGAGGACTGAGAAGGTGG-----
-----TGGAGGACTGAGAAGGTGGAGCA-----
-----TGGAGGACTGAGAAGGTGG-----
```

```
-----GGAGGACTGAGAAGGTGGAG-----
-----CTATGGAGGACTGAGAAGGTGGAGCAGTT-----
-----TATGGAGGACTGAGAAGGTGG-----
-----GGAGGACTGAGAAGGTGGA-----
-----CTATGGAGGACTGAGAAG-----
-----TATGGAGGACTGAGAAGGTG-----
-----TGGAGGACTGAGAAGGTGGA-----
-----AGAATGTCCTCTCTATCA-----
-----ATGTCCTCTCTATCACCG-----
-----AGAATGTCCTCTCTATCAC-----
-----GTGGAGGGGCAGC-----
-----CACCGTGGAGGGGCAGC-----
-----CCGTGGAGGGGCAGC-----
```

>mmu-mir-681

```
CAACAACCTCAGAGCACAGTGCAGCCTCGCTGGCAGGCAGCTCCAGAGTGTGGCTGTCCATCACTCTCCCTAAGCAGGTAGATGGGTTTCAGTTCAGTCCAGGGCCT species len reads
CAACAACCTCAGAGCACAG-----morL 18 2
-----ACCTCAGAGCACAGTGCA-----morL 18 1
--ACAACCTCAGAGCACAGT-----morL 18 1
---CAACCTCAGAGCACAGTG-----morL 18 1
----ACCTCAGAGCACAGTGCAG-----morL 19 1
-----CAGCCTCGCTGGCAGGCAGCT-----mirL 21 649
-----CAGCCTCGCTGGCAGGCAGCTC-----mirL 22 121
-----AGCCTCGCTGGCAGGCAGCT-----mirL 20 32
-----CAGCCTCGCTGGCAGGCAG-----mirL 19 24
-----CAGCCTCGCTGGCAGGCAGC-----mirL 20 21
-----CCTCGCTGGCAGGCAGCT-----mirL 18 15
-----CAGCCTCGCTGGCAGGCAGCTCC-----mirL 23 10
-----CAGCCTCGCTGGCAGGCAGCA-----mirL 18 7
-----AGCCTCGCTGGCAGGCAGCTC-----mirL 21 4
-----CCTCGCTGGCAGGCAGCTCCAGAGTGTGGC-----mirL 30 1
-----GCCTCGCTGGCAGGCAGC-----mirL 18 1
-----AGCCTCGCTGGCAGGCAGCTCC-----mirL 22 1
-----AGCCTCGCTGGCAGGCAGC-----mirL 19 1
-----AGCAGGTAGATGGGTTTC-----mirR 18 8
-----AGCAGGTAGATGGGTTTCA-----mirR 19 8
-----GCAGGTAGATGGGTTTCA-----mirR 18 1
-----AGTTCAGTCCAGTCCAG-----morR 18 1
-----CACTCGAGTCCAGGGCCT-----morR 19 1
-----TCACTCGAGTCCAGGGC-----morR 18 1
-----CAGTTCAGTCCAGTCCAG-----morR 19 1
-----TTCAGTCCAGTCCAGGGC-----morR 19 1
```

>mmu-mir-190b

```
GCCTGCCTGCTTCTGTGTGATATGTTTGATATGGGTTGTTAAATTATGAACCAACTGAATGTCAAGCATACTCTCACAGCAGTAAGGAGACTTGGCACCACCTCCTTGG species len reads
GCCTGCCTGCTTCTGTGTGA-----morL 20 1
```

```

-CCTGCCTGCTTCTGTGTG----- morL 18 1
-----TGATATGTTTGATATTGGGTT----- mirL 21 470
-----TGATATGTTTGATATTGGGTTG----- mirL 22 124
-----TGATATGTTTGATATTGGGTT----- mirL 20 60
-----GATATGTTTGATATTGGGTT----- mirL 20 56
-----TGATATGTTTGATATTGGG----- mirL 19 41
-----TGATATGTTTGATATTGGGTTGT----- mirL 23 38
-----TGATATGTTTGATATTGG----- mirL 18 32
-----TATGTTTGATATTGGGTT----- mirL 18 27
-----GATATGTTTGATATTGGGTTG----- mirL 21 10
-----TGATATGTTTGATATTGGGTTGTT----- mirL 24 8
-----TATGTTTGATATTGGGTTG----- mirL 19 6
-----GATATGTTTGATATTGGGTTGTT----- mirL 23 2
-----GATATGTTTGATATTGGGTT----- mirL 19 2
-----GATATGTTTGATATTGGGTTGT----- mirL 22 1
-----ATATGTTTGATATTGGGTT----- mirL 19 1
-----GTGATATGTTTGATATTGGGTTG----- mirL 23 1
-----ATATGTTTGATATTGGGTT----- mirL 18 1
-----ATATGTTTGATATTGGGTTG----- mirL 20 1
-----CTCTCACAGCAGTAAGGAG----- mirR 19 11
-----CTCTCACAGCAGTAAGGA----- mirR 18 7
-----TCTCACAGCAGTAAGGAGACT----- mirR 21 2
-----ACTCTCACAGCAGTAAGG----- mirR 18 2
-----TACTCTCACAGCAGTAAG----- mirR 18 1
-----ATACTCTCACAGCAGTAAGGA----- mirR 21 1
-----CTCACAGCAGTAAGGAGACT----- mirR 20 1
-----ACTTGGCACCACCTCCTTGG morR 20 1

```

>mmu-mir-1937c

```

AACATACAAGTCTCACACAACGTACATCCAAGGGGTATTCTTGGGTTTCTGGGTGCCCCAAATCCCGGAAGAGCCCCATGATGTAAGATCCCCTTTC species len reads
-----AGTCTCACACAACGTACA----- morL 18 1
AACATACAAGTCTCACACAACG----- morL 22 1
-----CATCCAAGGGGTATTCTT----- mirL 18 4
-----CCAAGGGGTATTCTTGGG----- mirL 18 1
-----TACATCCAAGGGGTATTC----- mirL 18 1
-----TGGGTTTCTGGGTGCCCC----- loop 18 2
-----GGGTTTCTGGGTGCCCCAA----- loop 20 1
-----GTTTCTGGGTGCCCCAA----- loop 18 1
-----ATCCCGGAAGAGCCCCCA----- mirR 18 769
-----ATCCCGGAAGAGCCCCCAT----- mirR 19 75
-----ATCCCGGAAGAGCCCCCATG----- mirR 20 5
-----TCCCGGAAGAGCCCCCAT----- mirR 18 5
-----AATCCCGGAAGAGCCCCCA----- mirR 19 4
-----ATCCCGGAAGAGCCCCCATGAT----- mirR 22 3
-----AATCCCGGAAGAGCCCCC----- mirR 18 1
-----CCGGAAGAGCCCCCATGA----- mirR 18 1

```

```

-----CAAATCCCGGAAGAGCCCC----- mirR 19 1
-----AATCCCGGAAGAGCCCCCAT----- mirR 20 1
-----ATCCCGGAAGAGCCCCCATGA----- mirR 21 1
-----ATGATGTAAGATCCCCTT----- morR 18 2
-----CCATGATGTAAGATCCCC----- morR 18 2
-----GATGTAAGATCCCCTTTC morR 18 1

```

>mmu-mir-1959

| Species | len | reads |
|---------|-----|-------|
| morL    | 18  | 1     |
| morL    | 21  | 1     |
| morL    | 20  | 1     |
| morL    | 19  | 1     |
| mirL    | 18  | 489   |
| mirL    | 20  | 154   |
| mirL    | 19  | 118   |
| mirL    | 21  | 47    |
| mirL    | 19  | 13    |
| mirL    | 22  | 12    |
| mirL    | 24  | 8     |
| mirL    | 18  | 5     |
| mirL    | 20  | 4     |
| mirL    | 18  | 4     |
| mirL    | 23  | 2     |
| mirL    | 18  | 2     |
| mirL    | 19  | 2     |
| mirL    | 18  | 1     |
| mirL    | 18  | 1     |
| mirR    | 18  | 7     |
| mirR    | 18  | 4     |
| mirR    | 19  | 1     |

>mmu-mir-155

| Species | len | reads |
|---------|-----|-------|
| mirL    | 23  | 222   |
| mirL    | 18  | 137   |
| mirL    | 24  | 135   |
| mirL    | 22  | 87    |
| mirL    | 22  | 42    |
| mirL    | 25  | 40    |
| mirL    | 26  | 39    |
| mirL    | 23  | 28    |
| mirL    | 21  | 28    |
| mirL    | 21  | 22    |
| mirL    | 21  | 12    |
| mirL    | 22  | 12    |

```

-----ATGCTAATTGTGATAGGGGT----- mirL 20 10
----TAATGCTAATTGTGATAGGGGTTT----- mirL 24 8
-----ATGCTAATTGTGATAGGGG----- mirL 19 6
----ATGCTAATTGTGATAGGGGTT----- mirL 21 5
----TAATGCTAATTGTGATAG----- mirL 18 4
----AATGCTAATTGTGATAGG----- mirL 18 3
----AATGCTAATTGTGATAGGG----- mirL 20 3
----TAATGCTAATTGTGATAGGGGTTT----- mirL 25 3
----AATGCTAATTGTGATAGGG----- mirL 19 2
CTGTTAATGCTAATTGTG----- mirL 18 1
----AATGCTAATTGTGATAGGGGTTT----- mirL 23 1
--GTTAATGCTAATTGTGATAGGGGT----- mirL 24 1
----TAATGCTAATTGTGATAGG----- mirL 19 1
----ATGCTAATTGTGATAGGG----- mirL 18 1
-----AGCACTCACATGGAACAAA----- mirR 19 2
-----GCACTCACATGGAACAAA----- mirR 18 1
-----ACTAGCACTCACATGGAAC----- mirR 19 1
-----AGCACTCACATGGAACAA----- mirR 18 1
-----CACTCACATGGAACAAAT----- mirR 18 1

```

>mmu-mir-3059

```

TATCACAGGTGGTACGCCCTTTCCTCTCTGCCCCATAGGGTGTAGCTCTAACTACCCTCTAGGGAAGAGAAGGTTGGGTGA species len reads
-ATCACAGGTGGTACGCC----- morL 18 2
TATCACAGGTGGTACGCC----- morL 19 1
--TCACAGGTGGTACGCCCT----- morL 19 1
-ATCACAGGTGGTACGCCCT----- morL 19 1
-----TTTCCTCTCTGCCCCATAGGG----- mirL 21 188
-----TTTCCTCTCTGCCCCATAGGGT----- mirL 22 176
-----TTTCCTCTCTGCCCCATAGG----- mirL 20 89
-----TTTCCTCTCTGCCCCATAG----- mirL 19 84
-----TTTCCTCTCTGCCCCATAGGGTG----- mirL 23 70
-----TTTCCTCTCTGCCCCATAGGGTGT----- mirL 24 65
-----TTTCCTCTCTGCCCCATA----- mirL 18 25
-----TTTCCTCTCTGCCCCATAGGGT----- mirL 21 6
-----TTTCCTCTCTGCCCCATAGGGTGT----- mirL 23 6
-----CCTTTCCTCTCTGCCCCA----- mirL 18 6
-----TTTCCTCTCTGCCCCATAGGG----- mirL 20 5
-----TTTCCTCTCTGCCCCATAGGGTG----- mirL 22 4
-----TTTCCTCTCTGCCCCATAG----- mirL 18 4
-----CCTCTCTGCCCCATAGGGT----- mirL 19 3
-----TTTCCTCTCTGCCCCATAGGGTGTA----- mirL 24 2
-----CCTTTCCTCTCTGCCCCATAGGGT----- mirL 23 2
-----CCCTTTCCTCTCTGCCCC----- mirL 18 2
-----CCTCTCTGCCCCATAGGG----- mirL 18 2
-----CCTTTCCTCTCTGCCCCATA----- mirL 19 2
-----CCTTTCCTCTCTGCCCCAT----- mirL 19 1

```

```

-----TTCTCTCTGCCCCATAGG----- mirL 19 1
-----CCTCTAGGGAAGAGAAGGTTGG---- mirR 22 36
-----CCTCTAGGGAAGAGAAGGTTG---- mirR 21 13
-----ACCTCTAGGGAAGAGAAG----- mirR 19 7
-----CCCTCTAGGGAAGAGAAG----- mirR 18 5
-----CCTCTAGGGAAGAGAAGGTTGGGT-- mirR 24 4
-----CCCTCTAGGGAAGAGAAGGT----- mirR 20 3
-----CCCTCTAGGGAAGAGAAGGTTG---- mirR 22 3
-----CCTCTAGGGAAGAGAAGGTT----- mirR 20 3
-----CCCTCTAGGGAAGAGAAGGTTGG---- mirR 23 3
-----TCTAGGGAAGAGAAGGTTGG---- mirR 20 3
-----CCTCTAGGGAAGAGAAGGTTGGG--- mirR 23 2
-----CCCTCTAGGGAAGAGAAGG----- mirR 19 2
-----CTCTAGGGAAGAGAAGGT----- mirR 18 2
-----CCTCTAGGGAAGAGAAGGT----- mirR 19 2
-----ACCTCTAGGGAAGAGAA----- mirR 18 2
-----TACCTCTAGGGAAGAGAAG----- mirR 20 1
-----TCTAGGGAAGAGAAGGTTGGGTGA  mirR 24 1
-----CCCTCTAGGGAAGAGAAGGTT----- mirR 21 1
-----TCTAGGGAAGAGAAGGTTGGG--- mirR 21 1
-----TACCTCTAGGGAAGAGA----- mirR 18 1
-----CTCTAGGGAAGAGAAGGTTGG---- mirR 21 1
-----TCTAGGGAAGAGAAGGTTG----- mirR 19 1
-----CTCTAGGGAAGAGAAGGTT----- mirR 19 1
-----TCTAGGGAAGAGAAGGTTGGGT-- mirR 22 1
-----CCCTCTAGGGAAGAGAAGGTTGGG--- mirR 24 1

```

>mmu-mir-547

| Species                                                                                           | len | reads |
|---------------------------------------------------------------------------------------------------|-----|-------|
| ATGTAGTGTGTGATGTATCACTTGAGGATGTACCACCCATTTAACAGGAAACATGCTTGGTACATCTTTGAGTGAGATAACACACAACAGCTACCAC | 20  | 1     |
| ATGTAGTGTGTGATGTATCA-----                                                                         | 18  | 1     |
| ---TAGTGTGTGATGTATCAC-----                                                                        | 19  | 1     |
| -----TGTGTGATGTATCACTTGA-----                                                                     | 18  | 1     |
| -TGTTAGTGTGTGATGTATC-----                                                                         | 21  | 1     |
| ATGTAGTGTGTGATGTATCAC-----                                                                        | 21  | 2     |
| -----TGAGGATGTACCACCCATTTA-----                                                                   | 18  | 1     |
| -----ACTTGAGGATGTACCACC-----                                                                      | 20  | 553   |
| -----CTTGGTACATCTTTGAGTGA-----                                                                    | 19  | 125   |
| -----CTTGGTACATCTTTGAGTG-----                                                                     | 21  | 43    |
| -----TTGGTACATCTTTGAGTGA-----                                                                     | 18  | 36    |
| -----CTTGGTACATCTTTGAGT-----                                                                      | 19  | 28    |
| -----CTTGGTACATCTTTGAGT-----                                                                      | 18  | 16    |
| -----CTTGGTACATCTTTGAGTGAGA-----                                                                  | 22  | 15    |
| -----CTTGGTACATCTTTGAGTGAGAT-----                                                                 | 23  | 5     |
| -----TGGTACATCTTTGAGTGAGA-----                                                                    | 20  | 2     |
| -----CTTGGTACATCTTTGAGTGAGATAA-----                                                               | 25  | 1     |

```
-----GCTTGGTACATCTTTGAGTGA----- mirR 21 1
-----TGGTACATCTTTGAGTGAG----- mirR 19 1
-----GGTACATCTTTGAGTGAGA----- mirR 19 1
-----TTGGTACATCTTTGAGTG----- mirR 18 1
-----GGTACATCTTTGAGTGAG----- mirR 18 1
-----GAGATAACACACAACAGC----- morR 18 3
-----ATAACACACAACAGCTACC-- morR 19 1
-----ATAACACACAACAGCTAC-- morR 18 1
-----TAACACACAACAGCTACC-- morR 18 1
-----TAACACACAACAGCTACCAC morR 20 1
```

>mmu-mir-184

```
TCTGCAGATCCCCTTTCCTTATCACTTTTCCAGCCAGCTTTGTGACTCTAAGTGTGGACGGAGAAGCTGATAAGGGTAGGTGACTGGCACTC species len reads
TCTGCAGATCCCCTTTCCTTATCACTTTTCCAGCCAGCTTTGTGACTCTAAGTGTGGACGGAGAAGCTGATAAGGGTAGGTGACTGGCACTC morL 18 2
-CTGCAGATCCCCTTTCCTTATCACTTTTCCAGCCAGCTTTGTGACTCTAAGTGTGGACGGAGAAGCTGATAAGGGTAGGTGACTGGCACTC morL 18 1
-----TCACTTTTCCAGCCAGCT----- mirL 18 4
-----TCACTTTTCCAGCCAGCTTT----- mirL 19 1
-----GCTTTGTGACTCTAAGTG----- loop 18 1
-----TTGTGACTCTAAGTGTG----- loop 18 1
-----TGGACGGAGAAGCTGATAA----- mirR 18 275
-----TGGACGGAGAAGCTGATAAGGGT----- mirR 22 146
-----TGGACGGAGAAGCTGATAAG----- mirR 19 146
-----TGGACGGAGAAGCTGATAAGGGTA----- mirR 23 78
-----TGGACGGAGAAGCTGATAAGGG----- mirR 21 42
-----TGGACGGAGAAGCTGATAAGGGTAG----- mirR 24 37
-----TGGACGGAGAAGCTGATAAGG----- mirR 20 25
-----GGACGGAGAAGCTGATAAG----- mirR 18 21
-----GGACGGAGAAGCTGATAAGGGT----- mirR 21 9
-----ACGGAGAAGCTGATAAGGGT----- mirR 19 8
-----GGACGGAGAAGCTGATAAGGGTA----- mirR 22 5
-----GACGGAGAAGCTGATAAGGGT----- mirR 20 4
-----GACGGAGAAGCTGATAAGGG----- mirR 19 4
-----GGACGGAGAAGCTGATAAGGG----- mirR 20 3
-----ACGGAGAAGCTGATAAGGG----- mirR 18 3
-----GACGGAGAAGCTGATAAGGGTA----- mirR 21 2
-----GTTGGACGGAGAAGCTGAT----- mirR 18 1
-----ACGGAGAAGCTGATAAGGGTAG----- mirR 21 1
-----GGACGGAGAAGCTGATAAGGGTAG----- mirR 23 1
-----GTTGGACGGAGAAGCTGATAAGGGTA----- mirR 25 1
-----GGACGGAGAAGCTGATAAGG----- mirR 19 1
-----GGTAGGTGACTGGCACTC morR 18 1
```

>mmu-mir-432

```
CCACTTCCCAGGAGTAGATCAGTGGGTAGCTCTTGCACTTCTGGTGGGGGCCACTGGATGGCTCCTCCACTTCTTGGAGTAGATCAGTGGGCAGCTCTTGCACTTCTGGTGGGGGCCACTGGATGGCTCCTCCACTTCTT
-CACTTCCCAGGAGTAGATCAG-----
---CTTCCCAGGAGTAGATCAGT-----
```

```

CCACTTCCCGGAGTAGAT-----
-----CAGTGGGTAGCTCTTGCA-----
-----TGGGTAGCTCTTGCAATT-----
-----
-----CTGGATGGCTCCTCCACTTCT-----
-----CTGGATGGCTCCTCCACTTC-----
-----CTGGATGGCTCCTCCACTT-----
-----CTGGATGGCTCCTCCACT-----
-----CTGGATGGCTCCTCCACTTCT-----
-----GGATGGCTCCTCCACTTCT-----
-----GATGGCTCCTCCACTTCT-----
-----GGATGGCTCCTCCACTTC-----
-----TGGATGGCTCCTCCACTT-----
-----CCACTGGATGGCTCCTCCACT-----
-----ACTGGATGGCTCCTCCAC-----

```

>mmu-mir-688

| Sequence                                                                                                | species | len | reads |
|---------------------------------------------------------------------------------------------------------|---------|-----|-------|
| CTGGGGGAGGGACGGGCGAAAGGGCAGTGAAGAAAAGTAGGGGCTTGCTTGGGGAGAGCACCTCGCAGGCGACTACTTATTCCAGCTCGCCCCCAGCAAGTCC | morL    | 22  | 6     |
| CTGGGGGAGGGACGGGCGAAAG                                                                                  | morL    | 19  | 6     |
| CTGGGGGAGGGACGGGCGA                                                                                     | morL    | 18  | 3     |
| CTGGGGGAGGGACGGGCG                                                                                      | morL    | 21  | 2     |
| CTGGGGGAGGGACGGGCGAAA                                                                                   | morL    | 19  | 1     |
| CTGGGGGAGGGACGGGCGAAAG                                                                                  | morL    | 20  | 1     |
| CTGGGGGAGGGACGGGCGAA                                                                                    | mirL    | 18  | 3     |
| -----AAGGGCAGTGAAGAAAAG-----                                                                            | mirL    | 18  | 2     |
| -----GAAAGGGCAGTGAAGAAA-----                                                                            | mirL    | 19  | 1     |
| -----CGAAAGGGCAGTGAAGAAA-----                                                                           | mirR    | 20  | 297   |
| -----TCGCAGGCGACTACTTATTC-----                                                                          | mirR    | 19  | 207   |
| -----TCGCAGGCGACTACTTAT-----                                                                            | mirR    | 18  | 179   |
| -----TCGCAGGCGACTACTTAT-----                                                                            | mirR    | 21  | 46    |
| -----TCGCAGGCGACTACTTATTC-----                                                                          | mirR    | 18  | 12    |
| -----TCGCAGGCGACTACTTATTC-----                                                                          | mirR    | 22  | 11    |
| -----TCGCAGGCGACTACTTATTC-----                                                                          | mirR    | 19  | 7     |
| -----GCAGGCGACTACTTATTC-----                                                                            | mirR    | 18  | 5     |
| -----TCGCAGGCGACTACTTATTCAGCTCGC-----                                                                   | mirR    | 28  | 4     |
| -----TCGCAGGCGACTACTTATTCAGCTC-----                                                                     | mirR    | 26  | 3     |
| -----CGCAGGCGACTACTTATTC-----                                                                           | mirR    | 20  | 2     |
| -----CGCAGGCGACTACTTATTC-----                                                                           | mirR    | 21  | 1     |
| -----CGCAGGCGACTACTTATTC-----                                                                           | mirR    | 21  | 1     |
| -----CGCAGGCGACTACTTATTC-----                                                                           | mirR    | 20  | 1     |
| -----CGCAGGCGACTACTTATTCAGCTC-----                                                                      | mirR    | 25  | 1     |
| -----CCAGCTCGCCCCCAGCA-----                                                                             | morR    | 18  | 1     |
| -----CTCGCCCCCAGCAAGTCC-----                                                                            | morR    | 19  | 1     |
| -----TCCAGCTCGCCCCCAGCAA-----                                                                           | morR    | 20  | 1     |
| -----TTCCAGCTCGCCCCCAG-----                                                                             | morR    | 18  | 1     |
| -----CAGCTCGCCCCCAGCAA-----                                                                             | morR    | 18  | 1     |



```

-----TCCAGCTCGCCCCCAGC----- morR 18 1

>mmu-mir-669m-2
TTCCCCACAATATATTTGCATGTGTGTATAGTTTTGTGTGCATGTGCATGTGTGTATATGAATATACATATACATCCACACAAACATATACA species len reads
--CCCCACAATATATTTGCA----- morL 18 1
TTCCCCACAATATATTTGCA----- morL 20 1
-----TGTGTATAGTTTTGTGTGCATGTGCATGT----- mirL 29 2
-----GTGTATAGTTTTGTGTGC----- mirL 18 1
-----ATGTGTGTATAGTTTTGTG----- mirL 19 1
-----ATGTGTGTATAGTTTTGT----- mirL 18 1
-----ATATACATCCACACAAACATAT----- mirR 22 441
-----ATATACATCCACACAAACATA----- mirR 21 125
-----ATATACATCCACACAAACATATA----- mirR 23 49
-----ATATACATCCACACAAACAT----- mirR 20 21
-----CATATACATCCACACAAACATAT----- mirR 23 20
-----CATATACATCCACACAAAC----- mirR 19 19
-----ATATACATCCACACAAACA----- mirR 19 18
-----ATACATCCACACAAACATAT----- mirR 20 16
-----TATACATCCACACAAACATAT----- mirR 21 16
-----CATATACATCCACACAAACAT----- mirR 21 14
-----TATACATCCACACAAACATA----- mirR 20 12
-----CATATACATCCACACAAACATA----- mirR 22 8
-----ATATACATCCACACAAAC----- mirR 18 7
-----TACATCCACACAAACATA----- mirR 18 4
-----ATACATCCACACAAACATA----- mirR 19 4
-----TACATCCACACAAACATAT----- mirR 19 4
-----ACATATACATCCACACAAACAT----- mirR 22 3
-----CATATACATCCACACAAACA----- mirR 20 3
-----ATACATCCACACAAACATATA----- mirR 21 3
-----TATACATCCACACAAACAT----- mirR 19 2
-----ACATATACATCCACACAAA----- mirR 19 2
-----ATATACATCCACACAAACATATACA mirR 25 2
-----TATACATCCACACAAACA----- mirR 18 2
-----TATACATCCACACAAACATATA----- mirR 22 1
-----TACATATACATCCACACA----- mirR 18 1
-----CATATACATCCACACAAACATATAC- mirR 25 1

>mmu-mir-669m-1
ATGTGTGTATAGTTTTGTGTGCATGTGCATGTGTGTATATGAATAGACATATACATCCACACAAACATATAC species len reads
--TGTGTATAGTTTTGTGTGCATGTGCATGT----- mirL 29 2
ATGTGTGTATAGTTTTGTG----- mirL 19 1
ATGTGTGTATAGTTTTGT----- mirL 18 1
----GTGTATAGTTTTGTGTGC----- mirL 18 1
-----TGTGTGTATATGAATAGACA----- loop 20 1
-----ATATACATCCACACAAACATAT----- mirR 22 441
-----ATATACATCCACACAAACATA----- mirR 21 125

```

```

-----ATATACATCCACACAAAACATATA- mirR 23 49
-----ATATACATCCACACAAAACAT---- mirR 20 21
-----CATATACATCCACACAAAACATAT-- mirR 23 20
-----CATATACATCCACACAAAAC----- mirR 19 19
-----ATATACATCCACACAAAACA----- mirR 19 18
-----ATACATCCACACAAAACATAT-- mirR 20 16
-----TATACATCCACACAAAACATAT-- mirR 21 16
-----CATATACATCCACACAAAACAT---- mirR 21 14
-----TATACATCCACACAAAACATA--- mirR 20 12
-----CATATACATCCACACAAAACATA--- mirR 22 8
-----ATATACATCCACACAAAAC----- mirR 18 7
-----TACATCCACACAAAACATA--- mirR 18 4
-----TACATCCACACAAAACATAT-- mirR 19 4
-----ATACATCCACACAAAACATA--- mirR 19 4
-----CATATACATCCACACAAAACA----- mirR 20 3
-----ATACATCCACACAAAACATATA- mirR 21 3
-----ACATATACATCCACACAAAACAT--- mirR 22 3
-----ACATATACATCCACACAAA----- mirR 19 2
-----TATACATCCACACAAAACA----- mirR 18 2
-----TATACATCCACACAAAACAT---- mirR 19 2
-----ATATACATCCACACAAAACATATAC mirR 24 2
-----TATACATCCACACAAAACATATA- mirR 22 1
-----CATATACATCCACACAAAACATATAC mirR 25 1

```

>mmu-mir-1900

```

CTCCAGGTGGTGGCAGAAGCGTGGGAAGCTAGAAGAGGGCGGAGCCTGGAGGGGACACCCGGGCCGCCCTCTCTGGTCTTCAATTCCGCCCCCGCCTTATCCACCTGGCTC species len reads
CTCCAGGTGGTGGCAGAAG----- morL 19 1
---CAGGTGGTGGCAGAAGCG----- morL 18 1
-----GCGTGGGAAGCTAGAAGAG----- mirL 19 2
-----GGCCGCCCTCTCTGGTCTTCA----- mirR 22 577
-----GGCCGCCCTCTCTGGTCTTCC----- mirR 21 54
-----GCCGCCCTCTCTGGTCTTCA----- mirR 21 17
-----GGCCGCCCTCTCTGGTCCT----- mirR 19 16
-----CGCCCTCTCTGGTCTTCA----- mirR 19 15
-----GGCCGCCCTCTCTGGTCTTCAA----- mirR 23 12
-----GGCCGCCCTCTCTGGTCTT----- mirR 20 9
-----GGCCGCCCTCTCTGGTCC----- mirR 18 8
-----GGCCGCCCTCTCTGGTCTTCAAT----- mirR 24 5
-----CCGCCCTCTCTGGTCTTCA----- mirR 20 5
-----GGCCGCCCTCTCTGGTCTTCA----- mirR 23 2
-----GCCGCCCTCTCTGGTCTTCAA----- mirR 22 2
-----CGCCCTCTCTGGTCTTCC----- mirR 18 2
-----GCCGCCCTCTCTGGTCTT----- mirR 18 1
-----CCGCCCTCTCTGGTCTTCC----- mirR 19 1
-----GCCGCCCTCTCTGGTCTTCC----- mirR 20 1
-----CCGCCCTCTCTGGTCTT----- mirR 18 1

```

```

-----GGGCCGCCCTCTCTGGTC----- mirR 18 1
-----TTCCGCCCCCGCCTTATC----- morR 18 1
-----ATTCCGCCCCCGCCTTATCC----- morR 20 1
-----ATTCCGCCCCCGCCTTATCCACCTGGCTC morR 29 1
-----ATTCCGCCCCCGCCTTATCCAC----- morR 22 1
-----ATTCCGCCCCCGCCTTATCCACC----- morR 23 1
-----ATTCCGCCCCCGCCTTATCCA----- morR 21 1
-----CCGCCCCCGCCTTATCCA----- morR 18 1

```

>mmu-mir-3078

| Species | len | reads |
|---------|-----|-------|
| morL    | 18  | 11    |
| morL    | 19  | 4     |
| morL    | 20  | 4     |
| morL    | 22  | 3     |
| morL    | 22  | 2     |
| morL    | 21  | 2     |
| morL    | 21  | 2     |
| morL    | 19  | 1     |
| morL    | 25  | 1     |
| morL    | 22  | 1     |
| morL    | 26  | 1     |
| morL    | 18  | 1     |
| morL    | 18  | 1     |
| morL    | 24  | 1     |
| morL    | 18  | 1     |
| morL    | 19  | 1     |
| mirL    | 23  | 234   |
| mirL    | 22  | 204   |
| mirL    | 22  | 93    |
| mirL    | 18  | 44    |
| mirL    | 21  | 19    |
| mirL    | 24  | 19    |
| mirL    | 21  | 12    |
| mirL    | 23  | 6     |
| mirL    | 19  | 5     |
| mirL    | 25  | 4     |
| mirL    | 24  | 3     |
| mirL    | 19  | 1     |
| mirL    | 19  | 1     |
| mirL    | 19  | 1     |
| mirL    | 23  | 1     |
| mirL    | 21  | 1     |
| mirL    | 18  | 1     |
| mirL    | 20  | 1     |
| loop    | 19  | 1     |

```

-----CTTGTATTGTGCTTGGGG----- loop 18 1
-----TTGTATTGTGCTTGGGGTT----- loop 19 1
-----TTGCTGGGGTAGTCTTTAGGGGA----- mirR 23 13
-----TTGCTGGGGTAGTCTTTAGGGG----- mirR 22 9
-----TTGCTGGGGTAGTCTTTAGGGGAA----- mirR 24 7
-----TTGCTGGGGTAGTCTTTAGGG----- mirR 21 3
-----TTGCTGGGGTAGTCTTTAGG----- mirR 20 3
-----GTTGCTGGGGTAGTCTTTAGG----- mirR 21 2
-----TTGCTGGGGTAGTCTTTAGGGGAAGC----- mirR 26 2
-----GTTGCTGGGGTAGTCTTTA----- mirR 19 2
-----GTTGCTGGGGTAGTCTTTAG----- mirR 20 1
-----TGCTGGGGTAGTCTTTAGGGGA----- mirR 22 1
-----GTTGCTGGGGTAGTCTTTAGGG----- mirR 23 1
-----GTTGCTGGGGTAGTCTTTAGGG----- mirR 22 1
-----TTGCTGGGGTAGTCTTTAG----- mirR 19 1
-----CTGTTTGTACCCGTTG morR 18 1
-----AGCTGTTTGTACCCGTT-- morR 18 1

```

>mmu-mir-1951

```

GGGTGGGGGTTTAGAAACCACCTCTTCACTTACTTCTGAAAGTTAAAAGGTAGTGGAGACTGGTGTGGCTAAACCTCTTGCCTCCCCATCAG species len reads
----GGGGTTTAGAAACCACCT----- morL 18 1
----GGGGTTTAGAAACCACCT----- morL 18 1
GGGTGGGGGTTTAGAAACC----- morL 19 1
GGGTGGGGGTTTAGAAAC----- morL 18 1
-----CCTCTTCACTTACTTCT----- mirL 18 4
-----CCTCTTCACTTACTTCT----- mirL 19 2
-----TCTCTTCACTTACTTCTG----- mirL 18 1
-----CCACCTCTTCACTTAC----- mirL 18 1
-----TCTCTTCACTTACTTCTGA----- mirL 19 1
-----CTCTCTTCACTTACTTCT----- mirL 18 1
-----GTAGTGGAGACTGGTGTGGCTA----- mirR 22 336
-----GTAGTGGAGACTGGTGTGGCTAA----- mirR 23 160
-----GTAGTGGAGACTGGTGTGGCT----- mirR 21 68
-----GTAGTGGAGACTGGTGTGGCTAAA----- mirR 24 25
-----GTAGTGGAGACTGGTGTGGC----- mirR 20 24
-----GTAGTGGAGACTGGTGTGG----- mirR 19 19
-----GTAGTGGAGACTGGTGTG----- mirR 18 14
-----GGTAGTGGAGACTGGTGTGGCTA----- mirR 23 10
-----AGTGGAGACTGGTGTGGCTA----- mirR 20 7
-----AGTGGAGACTGGTGTGGCTAA----- mirR 21 6
-----TAGTGGAGACTGGTGTGGCTA----- mirR 21 5
-----GTGGAGACTGGTGTGGCTAA----- mirR 20 4
-----TAGTGGAGACTGGTGTGGC----- mirR 19 3
-----GGTAGTGGAGACTGGTGTGGCTAA----- mirR 24 2
-----TAGTGGAGACTGGTGTGGCTAA----- mirR 22 2
-----AGTGGAGACTGGTGTGGCT----- mirR 19 1

```

```

-----GGTAGTGGAGACTGGTGTGGCTAAAC----- mirR 26 1
-----GTGGAGACTGGTGTGGCT----- mirR 18 1
-----CTAAACCTCTTGCCTCCCC----- morR 19 3
-----AAACCTCTTGCCTCCCCA----- morR 18 2
-----CTCTTGCCTCCCCATCAG morR 18 2
-----TAAACCTCTTGCCTCCCCA----- morR 19 1
-----TAAACCTCTTGCCTCCCC----- morR 18 1
-----AACCTCTTGCCTCCCCAT--- morR 18 1
-----ACCTCTTGCCTCCCCATC-- morR 18 1

```

>mmu-mir-880

```

TGTGTGCACTGCAATACTCAGATTGATATGAGTCACTTCCTATTGCATGTTACTCCATCCTCTCTGAGTAGAGTAAGGCACACCAAT species len reads
---GTGCACTGCAATACTCAG----- morL 18 2
TGTGTGCACTGCAATACT----- morL 18 1
---CAGATTGATATGAGTCACTTC----- mirL 21 1
---ATTGATATGAGTCACTTC----- mirL 18 1
---TACTCCATCCTCTCTGAGTAG----- mirR 21 313
---TACTCCATCCTCTCTGAGTAGA----- mirR 22 131
---TACTCCATCCTCTCTGAGTA----- mirR 20 51
---TACTCCATCCTCTCTGAGTAGAG----- mirR 23 48
---ACTCCATCCTCTCTGAGTAG----- mirR 20 39
---CTCCATCCTCTCTGAGTAG----- mirR 19 25
---TCCATCCTCTCTGAGTAG----- mirR 18 25
---TACTCCATCCTCTCTGAGT----- mirR 19 15
---ACTCCATCCTCTCTGAGTAGA----- mirR 21 14
---TACTCCATCCTCTCTGAG----- mirR 18 8
---CTCCATCCTCTCTGAGTA----- mirR 18 5
---ACTCCATCCTCTCTGAGTAGAG----- mirR 22 3
---ACTCCATCCTCTCTGAGT----- mirR 18 3
---ACTCCATCCTCTCTGAGTA----- mirR 19 3
---CTCCATCCTCTCTGAGTAGA----- mirR 20 2
---TCCATCCTCTCTGAGTAGA----- mirR 19 2
---TTACTCCATCCTCTCTGA----- mirR 18 1
---TAGAGTAAGGCACACCAA- morR 18 1
---AGAGTAAGGCACACCAAT morR 18 1

```

>mmu-mir-1930

```

TGGACCACATGCCACGGTCACCTCCATAGTACCTGCAGCGTGCTTGACTTTCTCTATGGTGCAGTTACTGTGGCTGTGGCTGTGTTTCGTGCCTCAGACTGAAAAGGACTGAGATGGACTCTCCAGGG species len
TGGACCACATGCCACGGTC----- morL 20 1
---CACATGCCACGGTCACC----- morL 18 1
---GACCACATGCCACGGTC----- morL 18 1
---ACCTCCATAGTACCTGCAGCGT----- mirL 22 179
---ACCTCCATAGTACCTGCAGCG----- mirL 21 122
---ACCTCCATAGTACCTGCAGCGTG----- mirL 23 63
---ACCTCCATAGTACCTGCAGC----- mirL 20 62
---ACCTCCATAGTACCTGCAG----- mirL 19 27

```

```

-----ACCTCCATAGTACCTGCA----- mirL 18 22
-----ACCTCCATAGTACCTGCAGCGTGC----- mirL 24 12
-----CCTCCATAGTACCTGCAGCG----- mirL 20 6
-----CCTCCATAGTACCTGCAGCGT----- mirL 21 5
-----CTCCATAGTACCTGCAGCG----- mirL 19 4
-----CTCCATAGTACCTGCAGC----- mirL 18 3
-----TCCATAGTACCTGCAGCG----- mirL 18 3
-----GTCACCTCCATAGTACCTGCAGCG----- mirL 24 1
-----TCCATAGTACCTGCAGCGT----- mirL 19 1
-----CCTCCATAGTACCTGCAG----- mirL 18 1
-----CTCCATAGTACCTGCAGCGT----- mirL 20 1
-----TGCCTCAGACTGAAAAGG----- mirR 18 156
-----TGCCTCAGACTGAAAAGGA----- mirR 19 4
-----GCCTCAGACTGAAAAGGA----- mirR 18 4
-----CGTGCCTCAGACTGAAAAGG----- mirR 20 1
-----CGTGCCTCAGACTGAAAA----- mirR 18 1
-----GGACTGAGATGGACTCTCC----- morR 19 1
-----GAGATGGACTCTCCAGGG----- morR 18 1
-----GGACTGAGATGGACTCTC----- morR 18 1

```

>mmu-mir-1971

```

TACAGGGCATCATTTGGTAAAGGCTGGGCTGAGAGGACATCTTTGTTCCATGGACCCAGTAGATAGGCAGCTTCTGCTTCCAGGAACAACCTTGTCTGTTTTTCAGTCTATCTACTTCCATAAAATTTCAATTTGCTCAC sp
TACAGGGCATCATTTGGT----- mo
-----GTAAAGGCTGGGCTGAGA----- mi
-----GTAAAGGCTGGGCTGAGAG----- mi
-----GTAAAGGCTGGGCTGAGAGGA----- mi
-----GTAAAGGCTGGGCTGAGAGG----- mi
-----AAAGGCTGGGCTGAGAGGACA----- mi
-----TAAAGGCTGGGCTGAGAG----- mi
-----GTAAAGGCTGGGCTGAGAGGAC----- mi
-----GTAAAGGCTGGGCTGAGAGGACA----- mi
-----GTAAAGGCTGGGCTGAGAGGACATC----- mi
-----GGTAAAGGCTGGGCTGAGA----- mi
-----AAAGGCTGGGCTGAGAGGA----- mi
-----GGTAAAGGCTGGGCTGAG----- mi
-----GGTAAAGGCTGGGCTGAGAG----- mi
-----AGTCTATCTACTTCCTAAAA----- mi
-----GTCTATCTACTTCCTAAAA----- mi
-----AGTCTATCTACTTCCTAAA----- mi
-----AGTCTATCTACTTCCTAA----- mi
-----GTCTATCTACTTCCTAAA----- mi
-----TTCAGTCTATCTACTTCC----- mi
-----AGTCTATCTACTTCCTAAAAAT----- mi
-----AAATTTCAATTTGCTCAC----- mo

```

>mmu-mir-1948

| Sequence                                                                                | species | len | reads |
|-----------------------------------------------------------------------------------------|---------|-----|-------|
| CATTTAGGCAGAATTCTCACCTTACTATATGAGTATTCTGCCTAAATGTGGTGTACGGATACATTTAGGCAGAGCACTCGTACAGTA | morL    | 20  | 1     |
| CATTTAGGCAGAATTCTCAC-----CCTTACTATATGAGTATT-----                                        | mirL    | 18  | 10    |
| -----ACCTTACTATATGAGTAT-----                                                            | mirL    | 18  | 1     |
| -----ACCTTACTATATGAGTATT-----                                                           | mirL    | 19  | 1     |
| -----TTTAGGCAGAGCACTCGTACA---                                                           | mirR    | 21  | 259   |
| -----TTTAGGCAGAGCACTCGTACAG--                                                           | mirR    | 22  | 143   |
| -----TTTAGGCAGAGCACTCGTAC----                                                           | mirR    | 20  | 47    |
| -----TTAGGCAGAGCACTCGTACA--                                                             | mirR    | 20  | 36    |
| -----TTAGGCAGAGCACTCGTACAG--                                                            | mirR    | 21  | 30    |
| -----TAGGCAGAGCACTCGTACA--                                                              | mirR    | 19  | 21    |
| -----AGGCAGAGCACTCGTACAG--                                                              | mirR    | 19  | 19    |
| -----AGGCAGAGCACTCGTACA--                                                               | mirR    | 18  | 14    |
| -----TTTAGGCAGAGCACTCGT-----                                                            | mirR    | 18  | 14    |
| -----TTTAGGCAGAGCACTCGTA----                                                            | mirR    | 19  | 12    |
| -----TTAGGCAGAGCACTCGTAC----                                                            | mirR    | 19  | 11    |
| -----TAGGCAGAGCACTCGTACAG--                                                             | mirR    | 20  | 11    |
| -----TTTAGGCAGAGCACTCGTACAGT-                                                           | mirR    | 23  | 5     |
| -----ATTTAGGCAGAGCACTCGTACAG--                                                          | mirR    | 23  | 5     |
| -----TAGGCAGAGCACTCGTAC----                                                             | mirR    | 18  | 4     |
| -----ATTTAGGCAGAGCACTCGTACA---                                                          | mirR    | 22  | 3     |
| -----TTAGGCAGAGCACTCGTA----                                                             | mirR    | 18  | 3     |
| -----TTAGGCAGAGCACTCGTACAGT-                                                            | mirR    | 22  | 2     |
| -----TTTAGGCAGAGCACTCGTACAGTA                                                           | mirR    | 24  | 1     |
| -----TAGGCAGAGCACTCGTACAGT-                                                             | mirR    | 21  | 1     |
| -----TAGGCAGAGCACTCGTACAGTA                                                             | mirR    | 22  | 1     |

>mmu-mir-709

| Sequence                                                                                                    | species | len | reads |
|-------------------------------------------------------------------------------------------------------------|---------|-----|-------|
| GTGTCCCGTTTCTCTGCTTCTACTCAGAAGTGCTCTGAGCATAGAAGTGTCTGTTTGAGCAGCACTGGGGAGGCAGAGGCAGGAGGATTGTCTTTTGTATATTGACT | mirL    | 18  | 2     |
| ----CCCGTTTCTCTGCTTCTA-----                                                                                 | mirL    | 18  | 2     |
| ---TCCCGTTTCTCTGCTTCT-----                                                                                  | mirL    | 20  | 2     |
| -TGTCCCGTTTCTCTGCTTCT-----                                                                                  | mirL    | 18  | 1     |
| GTGTCCCGTTTCTCTGCT-----                                                                                     | mirL    | 19  | 1     |
| ----CCCGTTTCTCTGCTTCTAC-----                                                                                | mirL    | 18  | 1     |
| --GTCCCGTTTCTCTGCTTC-----                                                                                   | mirL    | 19  | 1     |
| -----CGTTTCTCTGCTTCTACTC-----                                                                               | mirR    | 19  | 290   |
| -----GGAGGCAGAGGCAGGAGGA-----                                                                               | mirR    | 20  | 115   |
| -----GGAGGCAGAGGCAGGAGGAT-----                                                                              | mirR    | 19  | 39    |
| -----AGGCAGAGGCAGGAGGATT-----                                                                               | mirR    | 24  | 32    |
| -----GGAGGCAGAGGCAGGAGGATTGTC-----                                                                          | mirR    | 23  | 25    |
| -----GAGGCAGAGGCAGGAGGATTGTC-----                                                                           | mirR    | 21  | 24    |
| -----GGCAGAGGCAGGAGGATTGTC-----                                                                             | mirR    | 18  | 16    |
| -----AGGCAGAGGCAGGAGGAT-----                                                                                | mirR    | 18  | 16    |
| -----GAGGCAGAGGCAGGAGGA-----                                                                                | mirR    | 19  | 12    |
| -----GAGGCAGAGGCAGGAGGAT-----                                                                               | mirR    | 23  | 6     |
| -----GGGGAGGCAGAGGCAGGAGGATT-----                                                                           |         |     |       |

```

-----AGGCAGAGGCAGGAGGATTG----- mirR 20 6
-----GAGGCAGAGGCAGGAGGATTG----- mirR 21 6
-----AGGCAGAGGCAGGAGGATTGTC----- mirR 22 6
-----GGAGGCAGAGGCAGGAGG----- mirR 18 5
-----GGAGGCAGAGGCAGGAGGATT----- mirR 21 5
-----GGGAGGCAGAGGCAGGAGGAT----- mirR 21 3
-----GAGGCAGAGGCAGGAGGATTGT----- mirR 22 3
-----GGAGGCAGAGGCAGGAGGATTGT----- mirR 23 3
-----GGAGGCAGAGGCAGGAGGATTG----- mirR 22 3
-----TGGGGAGGCAGAGGCAGGAGGA----- mirR 22 2
-----GGGAGGCAGAGGCAGGAGGATTG----- mirR 23 2
-----GAGGCAGAGGCAGGAGGATTGTCTT----- mirR 25 2
-----GAGGCAGAGGCAGGAGGATT----- mirR 20 2
-----AGGCAGAGGCAGGAGGATTGTCT----- mirR 23 1
-----AGGCAGAGGCAGGAGGATTGT----- mirR 21 1
-----GGCAGAGGCAGGAGGATT----- mirR 18 1
-----GGGAGGCAGAGGCAGGAGGA----- mirR 20 1
-----GGCAGAGGCAGGAGGATTG----- mirR 19 1
-----TGTCTTTTGTATATTGACT----- morR 19 1
-----TCTTTTGTATATTGACT----- morR 18 1

```

>mmu-mir-465c-2

| sequence                                                                               | species | len | reads |
|----------------------------------------------------------------------------------------|---------|-----|-------|
| TATTTAGAATGGCGCTGATCTGATGAATAAAAAAAAAAATGATCAGGGCCTTTCTAAGTAGAGTAAGGCTTACCAACTTCTACGTT | mirL    | 22  | 226   |
| TATTTAGAATGGCGCTGATCTG-----                                                            | mirL    | 21  | 147   |
| TATTTAGAATGGCGCTGATCT-----                                                             | mirL    | 20  | 54    |
| TATTTAGAATGGCGCTGATC-----                                                              | mirL    | 19  | 51    |
| TATTTAGAATGGCGCTGA-----                                                                | mirL    | 18  | 34    |
| -ATTTAGAATGGCGCTGATCTG-----                                                            | mirL    | 21  | 32    |
| -ATTTAGAATGGCGCTGATCT-----                                                             | mirL    | 20  | 25    |
| ---TTAGAATGGCGCTGATCT-----                                                             | mirL    | 18  | 11    |
| ---TTAGAATGGCGCTGATCTG-----                                                            | mirL    | 19  | 9     |
| TATTTAGAATGGCGCTGATCTGA-----                                                           | mirL    | 23  | 8     |
| -ATTTAGAATGGCGCTGAT-----                                                               | mirL    | 18  | 7     |
| --TTAGAATGGCGCTGATCT-----                                                              | mirL    | 19  | 5     |
| -ATTTAGAATGGCGCTGATC-----                                                              | mirL    | 19  | 4     |
| --TTAGAATGGCGCTGATCTG-----                                                             | mirL    | 20  | 3     |
| --TTAGAATGGCGCTGATC-----                                                               | mirL    | 18  | 2     |
| -ATTTAGAATGGCGCTGATCTGA-----                                                           | mirL    | 22  | 1     |
| TATTTAGAATGGCGCTGATCTGAT-----                                                          | mirL    | 24  | 1     |
| -----AGGCTTACCAACTTCTAC-----                                                           | mirR    | 18  | 2     |
| -----CTTACCAACTTCTACGTT-----                                                           | mirR    | 18  | 1     |

>mmu-mir-465c-1

| sequence                                                                               | species | len | reads |
|----------------------------------------------------------------------------------------|---------|-----|-------|
| TATTTAGAATGGCGCTGATCTGATGAATAAAAAAAAAAATGATCAGGGCCTTTCTAAGTAGAGTAAGGCTTACCAACTTCTACGTT | mirL    | 22  | 226   |
| TATTTAGAATGGCGCTGATCTG-----                                                            | mirL    | 22  | 226   |



```

TATTTAGAATGGCGCTGATCT----- mirL 21 147
TATTTAGAATGGCGCTGATC----- mirL 20 54
TATTTAGAATGGCGCTGAT----- mirL 19 51
TATTTAGAATGGCGCTGA----- mirL 18 34
-ATTTAGAATGGCGCTGATCTG----- mirL 21 32
-ATTTAGAATGGCGCTGATCT----- mirL 20 25
---TTAGAATGGCGCTGATCT----- mirL 18 11
---TTAGAATGGCGCTGATCTG----- mirL 19 9
TATTTAGAATGGCGCTGATCTGA----- mirL 23 8
-ATTTAGAATGGCGCTGAT----- mirL 18 7
--TTTAGAATGGCGCTGATCT----- mirL 19 5
-ATTTAGAATGGCGCTGATC----- mirL 19 4
--TTTAGAATGGCGCTGATCTG----- mirL 20 3
--TTTAGAATGGCGCTGATC----- mirL 18 2
-ATTTAGAATGGCGCTGATCTGA----- mirL 22 1
TATTTAGAATGGCGCTGATCTGAT----- mirL 24 1
-----AGGCTTACCAACTTCTAC--- mirR 18 2
-----CTTACCAACTTCTACGTT mirR 18 1

```

>mmu-mir-1935

```

GGTGGCGCACACCTTTTATCCCAGCACTCTGGAGGCAGAGGCTGGCGGATCTCTGAGTTCGAGGCCAGCCTGGTCTACAGAGTGAGTTCCAAGACAGCCAGGGCTAC species len reads
-----CGCACACCTTTTATCCCAG----- morL 19 124
-----CGCACACCTTTTATCCCAGCA----- morL 21 38
-----CACACCTTTTATCCCAGCA----- morL 19 27
-----GCACACCTTTTATCCCAG----- morL 18 19
---GGCGCACACCTTTTATCCCAG----- morL 21 18
--TGGCGCACACCTTTTATCCCAG----- morL 22 15
-----GCACACCTTTTATCCCAGCA----- morL 20 12
-----CGCACACCTTTTATCCCA----- morL 18 11
-----CGCACACCTTTTATCCCAGCAC----- morL 22 9
-----CGCACACCTTTTATCCCAGCACT----- morL 23 9
---GCGCACACCTTTTATCCCAG----- morL 20 7
--TGGCGCACACCTTTTATCCCAGC----- morL 23 7
-----CACACCTTTTATCCCAGCACT----- morL 21 7
--TGGCGCACACCTTTTATCCCAGCA----- morL 24 6
-GTGGCGCACACCTTTTATCCCAG----- morL 23 4
---GGCGCACACCTTTTATCCCAGCA----- morL 23 4
-----ACACCTTTTATCCCAGCA----- morL 18 3
-----GCACACCTTTTATCCCAGCACT----- morL 22 3
-----GCACACCTTTTATCCCAGC----- morL 19 2
-----CACACCTTTTATCCCAGCAC----- morL 20 2
---GCGCACACCTTTTATCCCAGCA----- morL 22 2
---CGCACACCTTTTATCCCAGC----- morL 20 2
---GGCGCACACCTTTTATCCCAGCACTC----- morL 26 2
-----GCACACCTTTTATCCCAGCACTC----- morL 23 2
-----CACCTTTTATCCCAGCACT----- morL 19 2

```

```

---GGCGCACACCTTTTATCCCA----- morL 20 2
-----ACACCTTTTATCCCAGCACT----- morL 20 2
-----ACCTTTTATCCCAGCACT----- morL 18 1
-----CCTTTTATCCCAGCACTC----- morL 18 1
GGTGGCGCACACCTTTTATCCCAG----- morL 24 1
---GCGCACACCTTTTATCCCA----- morL 19 1
---GCGCACACCTTTTATCCCAGCAC----- morL 23 1
-GTGGCGCACACCTTTTATCCCA----- morL 22 1
--TGGCGCACACCTTTTATCCCA----- morL 21 1
-----ACACCTTTTATCCCAGCACTC----- morL 21 1
-----CACACCTTTTATCCCAGCACTC----- morL 22 1
--TGGCGCACACCTTTTATCCCAGCACT----- morL 26 1
-----ACACCTTTTATCCCAGCAC----- morL 19 1
--TGGCGCACACCTTTTATCCCAGCAC----- morL 25 1
---CGCACACCTTTTATCCCAGCACTC----- morL 24 1
-----ACCTTTTATCCCAGCACTC----- morL 19 1
---GGCGCACACCTTTTATCCCAGC----- morL 22 1
-----CTCTGGAGGCAGAGGCTGG----- mirL 19 3
-----CACTCTGGAGGCAGAGGC----- mirL 18 1
-----CTGGAGGCAGAGGCTGGC----- mirL 18 1
-----GCACTCTGGAGGCAGAGG----- mirL 18 1
-----TGGCGGATCTCTGAGTTCG----- loop 19 1
-----TCGAGGCCAGCCTGGTCTACA----- mir 21 51
-----TTCGAGGCCAGCCTGGTCTACA----- mir 22 49
-----CGAGGCCAGCCTGGTCTACA----- mir 20 23
-----GAGGCCAGCCTGGTCTACA----- mir 19 20
-----TTCGAGGCCAGCCTGGTCTAC----- mir 21 15
-----GAGGCCAGCCTGGTCTAC----- mir 18 15
-----CGAGGCCAGCCTGGTCTACAG----- mir 21 8
-----GAGGCCAGCCTGGTCTACAGAGTG----- mir 24 6
-----TTCGAGGCCAGCCTGGTCTACAGA----- mir 24 4
-----GAGGCCAGCCTGGTCTACAG----- mir 20 4
-----TCGAGGCCAGCCTGGTCTACAG----- mir 22 4
-----CGAGGCCAGCCTGGTCTAC----- mir 19 4
-----CGAGGCCAGCCTGGTCTA----- mir 18 3
-----TTCGAGGCCAGCCTGGTCTA----- mir 18 3
-----TTCGAGGCCAGCCTGGTCTACAG----- mir 23 2
-----TCGAGGCCAGCCTGGTCTA----- mir 19 2
-----TTCGAGGCCAGCCTGGTCTA----- mir 20 2
-----TTCGAGGCCAGCCTGGTCTACAGAG----- mir 25 2
-----TCGAGGCCAGCCTGGTCTAC----- mir 20 2
-----CGAGGCCAGCCTGGTCTACAGAGT----- mir 24 1
-----TCGAGGCCAGCCTGGTCTACAGAGTGAGTTCC----- mir 32 1
-----CGAGGCCAGCCTGGTCTACAGAGTGAGTTCC----- mir 31 1
-----TCGAGGCCAGCCTGGTCTACAGAGT----- mir 25 1
-----TCGAGGCCAGCCTGGTCTACAGAGTGAGTTCC----- mir 31 1

```

```

-----GAGGCCAGCCTGGTCTACAGA----- mirR 21 1
-----CGAGGCCAGCCTGGTCTACAGAGTGAGT----- mirR 28 1
-----ACAGAGTGAGTTCCAAGA----- morR 18 5
-----CAGAGTGAGTTCCAAGACAGCCAGGGC--- morR 27 3
-----GAGTGAGTTCCAAGACAGCCAGGGC--- morR 25 3
-----CAGAGTGAGTTCCAAGAC----- morR 18 3
-----AGAGTGAGTTCCAAGACAGCC----- morR 21 2
-----ACAGAGTGAGTTCCAAGACAGCC----- morR 23 2
-----ACAGAGTGAGTTCCAAGACAGCCAGGGC--- morR 28 2
-----AGTGAGTTCCAAGACAGCC----- morR 19 1
-----GTGAGTTCCAAGACAGCC----- morR 18 1
-----ACAGAGTGAGTTCCAAGACAG----- morR 21 1
-----CAGAGTGAGTTCCAAGACAGC----- morR 21 1
-----AGAGTGAGTTCCAAGACAGCCAGGGCTAC morR 29 1
-----GTGAGTTCCAAGACAGCCAG----- morR 20 1
-----ACAGAGTGAGTTCCAAGACAGC----- morR 22 1
-----AGTGAGTTCCAAGACAGC----- morR 18 1
-----TGAGTTCCAAGACAGCCA----- morR 18 1

>mmu-mir-1947
GAAAGATGAACAAGGTGGTGGAGGACGAGCTAGCTGAGTGCTGCAGACACTCTAAGAGCACTGAGCTAGCTCTCCCTCCATGCCCTGCTCAATCGTGAAGTCCGACGTGTGCCTGACCTCACAGAG species len
GAAAGATGAACAAGGTGG----- morL 18 1
---AGATGAACAAGGTGGTGG----- morL 19 1
---GATGAACAAGGTGGTGG----- morL 19 1
-----AGGACGAGCTAGCTGAGTGCTG----- mirL 22 328
-----AGGACGAGCTAGCTGAGTGCTG----- mirL 23 67
-----AGGACGAGCTAGCTGAGTGC----- mirL 20 34
-----AGGACGAGCTAGCTGAGTGCT----- mirL 21 29
-----AGGACGAGCTAGCTGAGTG----- mirL 19 17
-----AGGACGAGCTAGCTGAGTGCTGCA----- mirL 24 11
-----GGACGAGCTAGCTGAGTGCTG----- mirL 21 10
-----AGGACGAGCTAGCTGAGT----- mirL 18 10
-----ACGAGCTAGCTGAGTGCTG----- mirL 19 4
-----ACGAGCTAGCTGAGTGCTG----- mirL 20 3
-----GACGAGCTAGCTGAGTGCTG----- mirL 20 3
-----GACGAGCTAGCTGAGTGCTG----- mirL 21 2
-----GGACGAGCTAGCTGAGTGC----- mirL 19 2
-----ACGAGCTAGCTGAGTGCT----- mirL 18 2
-----GGACGAGCTAGCTGAGTGCT----- mirL 20 2
-----GGACGAGCTAGCTGAGTGCTG----- mirL 22 2
-----GAGGACGAGCTAGCTGAGTGCTG----- mirL 24 1
-----GAGGACGAGCTAGCTGAGTG----- mirL 20 1
-----GGACGAGCTAGCTGAGTGCTGCAG----- mirL 25 1
-----GGACGAGCTAGCTGAGTG----- mirL 18 1
-----GACGAGCTAGCTGAGTGC----- mirL 18 1
-----GGACGAGCTAGCTGAGTGCTGCAG----- mirL 26 1

```

C:\Documents and Settings\hong\Desktop\Hippocampus-total RNA.txt

```
-----CCCTGCTCAATCGTGAAGTTC----- mirR 21 18
-----CCCTGCTCAATCGTGAAGTTC----- mirR 22 7
-----GCCCTGCTCAATCGTGAAGT----- mirR 20 4
-----GCCCTGCTCAATCGTGAAGT----- mirR 18 4
-----CCTGCTCAATCGTGAAGT----- mirR 18 3
-----GCCCTGCTCAATCGTGAAGTTC----- mirR 22 2
-----CCCTGCTCAATCGTGAAGT----- mirR 19 2
-----CCCTGCTCAATCGTGAAGTTC----- mirR 20 2
-----CTGCTCAATCGTGAAGTTCCG----- mirR 21 1
-----GCCCTGCTCAATCGTGAAGTTC----- mirR 23 1
-----TGCCTGCTCAATCGTGAAG----- mirR 20 1
-----CGACGTGTGCCTGACCTCA----- morR 19 1
-----CGTGTGCCTGACCTCACAGAG morR 21 1
-----GACGTGTGCCTGACCTCA----- morR 18 1
```

>mmu-mir-1901

```
GAGAAGGCGATGGGCAGGATTCCTGAGTGAACGAGTTGAGGCGGCCCGACTGCCGCTCGTACTCCCGGGGGTCCCGGAGCCCAAAAAGCT species len reads
GAGAAGGCGATGGGCAGGA----- morL 19 1
-----TCCCTGAGTGAACGAGTTGA----- mirL 20 8
-----ATTCCTGAGTGAACGAG----- mirL 18 2
-----TCCCTGAGTGAACGAGTT----- mirL 18 1
-----CCTGAGTGAACGAGTTGA----- mirL 18 1
-----CCCTGAGTGAACGAGTTGAGG----- mirL 21 1
-----TCCCTGAGTGAACGAGTTGAG----- mirL 21 1
-----CCGCTCGTACTCCCGGGGGTCC----- mirR 22 265
-----CCGCTCGTACTCCCGGGGGTCCC----- mirR 23 82
-----CCGCTCGTACTCCCGGGGGTCC----- mirR 21 56
-----CCGCTCGTACTCCCGGGGGT----- mirR 20 38
-----CGCTCGTACTCCCGGGGGTCC----- mirR 21 34
-----GCTCGTACTCCCGGGGGTCC----- mirR 20 22
-----CCGCTCGTACTCCCGGGGG----- mirR 19 16
-----CGCTCGTACTCCCGGGGGTCCC----- mirR 22 9
-----CGCTCGTACTCCCGGGGGTCC----- mirR 20 8
-----GCTCGTACTCCCGGGGGTCCC----- mirR 21 7
-----CCGCTCGTACTCCCGGGGGTCCCG----- mirR 24 5
-----CGCTCGTACTCCCGGGGGT----- mirR 19 4
-----CCGCTCGTACTCCCGGGGG----- mirR 18 4
-----CTCGTACTCCCGGGGGTCC----- mirR 18 3
-----GCTCGTACTCCCGGGGGTCC----- mirR 19 3
-----CTCGTACTCCCGGGGGTCC----- mirR 19 2
-----GCTCGTACTCCCGGGGGT----- mirR 18 2
-----CGCTCGTACTCCCGGGGGTCCCG----- mirR 23 1
-----CCCGGAGCCCAAAAAGCT morR 18 1
```

>mmu-mir-466f-3

```
TGTATGTGCATGTGTGTTTACGTGTGTGTGCATGTGCATGTGTATATGAATATATGTATACATACACACATACACACGACGCAACACACACACACACACACACACACAC species len reads
```

```

--TATGTGCATGTGTGTTTAC----- morL 19 9
TGTATGTGCATGTGTGTTTAC----- morL 21 9
---ATGTGCATGTGTGTTTAC----- morL 18 4
--TATGTGCATGTGTGTTTACG----- morL 20 2
--TATGTGCATGTGTGTTTAA----- morL 18 2
-GTATGTGCATGTGTGTTTACG----- morL 21 1
-----ACGTGTGTGTGCATGTGCATGT----- mirL 22 106
-----TACGTGTGTGTGCATGTGCAT----- mirL 21 26
-----ACGTGTGTGTGCATGTGCATG----- mirL 21 15
-----TACGTGTGTGTGCATGTGCATG----- mirL 22 12
-----ACGTGTGTGTGCATGTGCA----- mirL 19 10
-----ACGTGTGTGTGCATGTGCAT----- mirL 20 8
-----ACGTGTGTGTGCATGTGCATGTG----- mirL 23 6
-----ACGTGTGTGTGCATGTGC----- mirL 18 6
-----TACGTGTGTGTGCATGTGCATGT----- mirL 23 2
-----TACGTGTGTGTGCATGTG----- mirL 18 2
-----TACGTGTGTGTGCATGTGCA----- mirL 20 1
-----TACGTGTGTGTGCATGTGC----- mirL 19 1
-----CGTGTGTGTGCATGTGCAT----- mirL 19 1
-----TTTACGTGTGTGTGCATGTGC----- mirL 21 1
-----CGTGTGTGTGCATGTGCATGT----- mirL 21 1
-----TTTACGTGTGTGTGCATGTG----- mirL 20 1
-----TTACGTGTGTGTGCATGTGC----- mirL 20 1
-----CATACACACACACATACAC----- mirR 21 103
-----ACATACACACACACATACAC----- mirR 20 44
-----ATACACACACACATACACACGC----- mirR 22 42
-----CATACACACACACATACACA----- mirR 20 33
-----CATACACACACACATACAC----- mirR 19 20
-----ATACACACACACATACACACG----- mirR 21 12
-----CATACACACACACATACA----- mirR 18 12
-----TACACACACACATACACACGC----- mirR 21 7
-----CATACACACACACATACACACG----- mirR 22 5
-----ACATACACACACACATAC----- mirR 18 4
-----TACACACACACATACACACGCA----- mirR 22 3
-----TACATACACACACACATAC----- mirR 19 3
-----CATACACACACACATACACACGC----- mirR 23 3
-----ACACACACACATACACACGCA----- mirR 21 2
-----TACACACACACATACACACG----- mirR 20 2
-----ACACACACACATACACACGC----- mirR 20 2
-----TACATACACACACATACAC----- mirR 21 1
-----ACACACACACATACACACGCAC----- mirR 22 1
-----ATACACACACACATACACACGCAC----- mirR 24 1
-----ATACACACACACATACACACGCA----- mirR 23 1
-----ACATACACACACACATACACA----- mirR 21 1
-----CGCAACACACACACACACACAC----- morR 24 5
-----ACGCAACACACACACACACAC----- morR 21 4

```

```

-----CACGCAACACACACACACA----- morR 19 2
-----CGCACGCAACACACACACAC----- morR 18 2
-----CGCAACACACACACACACACAC----- morR 22 2
-----CACGCACGCAACACACACACAC----- morR 20 2
-----ACGCAACACACACACACACA----- morR 18 2
-----CACGCAACACACACACACACAC----- morR 22 2
-----ACGCACGCAACACACACACACA----- morR 22 2
-----ACGCAACACACACACACACAC----- morR 19 2
-----GCACGCAACACACACACACACAC----- morR 23 1
-----CACGCACGCAACACACACACAC----- morR 18 1
-----CACGCACGCAACACACACACACACAC----- morR 32 1
-----CGCAACACACACACACACACACA----- morR 23 1
-----GCACGCAACACACACACACACACAC----- morR 31 1
-----CGCAACACACACACACACACAC----- morR 18 1
-----CACGCACGCAACACACACACACAC----- morR 26 1
-----ACGCAACACACACACACACACAC----- morR 23 1
-----ACGCACGCAACACACACACA----- morR 18 1
-----ACGCACGCAACACACACACAC----- morR 19 1
-----CACGCAACACACACACACACAC----- morR 20 1
-----ACGCACGCAACACACACACACACACAC----- morR 33 1
-----CGCACGCAACACACACACACACAC----- morR 24 1
-----CGCACGCAACACACACACACACAC----- morR 20 1
-----CACGCAACACACACACACACAC----- morR 18 1
-----ACGCAACACACACACACACACA----- morR 22 1
-----CGCAACACACACACACACACAC----- morR 20 1
-----ACGCAACACACACACACACACA----- morR 20 1

```

>mmu-mir-1962

```

GCAAACATATGTAGTCAGTCAGTGGTCCCATCTGTCTGCCTCTCTCTCGTTCAGTTCCATGGAGAGGCTGGCACTGGGACACATGACTGATGGTATGCTCCC species len reads
GCAAACATATGTAGTCAGT----- morL 18 1
-----TGGTCCCATCTGTCTGCCTCTC----- mirL 22 3
-----GGTCCCATCTGTCTGCCTC----- mirL 19 2
-----TGGTCCCATCTGTCTGCCTC----- mirL 20 1
-----GGTCCCATCTGTCTGCCT----- mirL 18 1
-----CTCTCTCGTTCAGTTCCA----- loop 19 1
-----TCTCGTTCAGTTCCATGG----- loop 19 1
-----AGAGGCTGGCACTGGGACACAT----- mirR 22 290
-----AGAGGCTGGCACTGGGACACA----- mirR 21 130
-----AGAGGCTGGCACTGGGACACATG----- mirR 23 41
-----AGAGGCTGGCACTGGGACAC----- mirR 20 27
-----AGAGGCTGGCACTGGGACA----- mirR 19 18
-----AGAGGCTGGCACTGGGAC----- mirR 18 11
-----GGCTGGCACTGGGACACAT----- mirR 19 8
-----AGGCTGGCACTGGGACACATG----- mirR 21 5
-----GAGAGGCTGGCACTGGGACACAT----- mirR 23 3
-----GGCTGGCACTGGGACACA----- mirR 18 3

```

C:\Documents and Settings\hong\Desktop\Hippocampus-total RNA.txt

```
-----GAGGCTGGCACTGGGACACAT----- mirR 21 3
-----GAGGCTGGCACTGGGACACA----- mirR 20 3
-----AGGCTGGCACTGGGACACA----- mirR 19 2
-----AGAGGCTGGCACTGGGACACATGACT----- mirR 26 1
-----GAGGCTGGCACTGGGACA----- mirR 18 1
-----AGGCTGGCACTGGGACAC----- mirR 18 1
-----GAGGCTGGCACTGGGACAC----- mirR 19 1
-----AGGCTGGCACTGGGACACAT----- mirR 20 1
-----CATGACTGATGGTATGCT--- morR 18 1
-----GACTGATGGTATGCTCCC morR 18 1
-----TGA CTGATGGTATGCTCC- morR 18 1
```

>mmu-mir-1967

```
GCCTGAATCTGTTTCTTTCTCTTTGCTCCTTTTGTCTGACATTCATGAGGATCCTGGGGAGAAGATGCAGAATTCCTGGAAATT species len reads
--CTGAATCTGTTTCTTTCT----- mirL 19 5
-CCTGAATCTGTTTCTTTCT----- mirL 19 4
GCCTGAATCTGTTTCTTTCT----- mirL 21 1
-CCTGAATCTGTTTCTTTCT----- mirL 20 1
-----TGAGGATCCTGGGGAGAAGATGC----- mirR 23 222
-----TGAGGATCCTGGGGAGAAGATG----- mirR 22 105
-----TGAGGATCCTGGGGAGAAGATGCA----- mirR 24 51
-----TGAGGATCCTGGGGAGAA----- mirR 18 41
-----TGAGGATCCTGGGGAGAAG----- mirR 19 40
-----TGAGGATCCTGGGGAGAAGA----- mirR 20 19
-----TGAGGATCCTGGGGAGAAGAT----- mirR 21 16
-----GGATCCTGGGGAGAAGATGC----- mirR 20 16
-----AGGATCCTGGGGAGAAGATGC----- mirR 21 8
-----GAGGATCCTGGGGAGAAGATGC----- mirR 22 6
-----AGGATCCTGGGGAGAAGATG----- mirR 20 4
-----GGATCCTGGGGAGAAGATG----- mirR 19 4
-----GAGGATCCTGGGGAGAAG----- mirR 18 4
-----GGATCCTGGGGAGAAGATGCA----- mirR 21 3
-----ATGAGGATCCTGGGGAGAAGATGC----- mirR 24 2
-----AGGATCCTGGGGAGAAGATGCA----- mirR 22 2
-----GGATCCTGGGGAGAAGAT----- mirR 18 1
-----GAGGATCCTGGGGAGAAGATG----- mirR 21 1
-----GAGGATCCTGGGGAGAAGATGCA----- mirR 23 1
-----CATGAGGATCCTGGGGAG----- mirR 18 1
-----AGGATCCTGGGGAGAAGATGCAGA----- mirR 24 1
-----GAGGATCCTGGGGAGAAGAT----- mirR 20 1
-----AGGATCCTGGGGAGAAGAT----- mirR 19 1
-----GCAGAATTCCTGGAAATT morR 19 1
```

>mmu-mir-466f-2

```
GTATGTGAATGTGTGTTTACGTGTGTGTCATGTGCATGTGTGTATATGAATATATGTATACATACACACACACACTCATGTAACACACACACACACACAC species len reads
-TATGTGAATGTGTGTTTACG----- morL 20 1
```

```

GTATGTGAATGTGTGTTT----- morL 18 1
-----ACGTGTGTGTGCATGTGCATGT----- mirL 22 106
-----TACGTGTGTGTGCATGTGCAT----- mirL 21 26
-----ACGTGTGTGTGCATGTGCATG----- mirL 21 15
-----TACGTGTGTGTGCATGTGCATG----- mirL 22 12
-----ACGTGTGTGTGCATGTGCA----- mirL 19 10
-----ACGTGTGTGTGCATGTGCAT----- mirL 20 8
-----ACGTGTGTGTGCATGTGCATGTG----- mirL 23 6
-----ACGTGTGTGTGCATGTGC----- mirL 18 6
-----TACGTGTGTGTGCATGTGCATGT----- mirL 23 2
-----TACGTGTGTGTGCATGTG----- mirL 18 2
-----TACGTGTGTGTGCATGTGCA----- mirL 20 1
-----TACGTGTGTGTGCATGTGC----- mirL 19 1
-----CGTGTGTGTGCATGTGCA----- mirL 19 1
-----TTTACGTGTGTGTGCATGTGC----- mirL 21 1
-----CGTGTGTGTGCATGTGCATGT----- mirL 21 1
-----TTTACGTGTGTGTGCATGTG----- mirL 20 1
-----TTACGTGTGTGTGCATGTGC----- mirL 20 1
-----CATACACACACACATACACAC----- mirR 21 103
-----ATACACACACACATACACACTC----- mirR 22 67
-----ACATACACACACACATACAC----- mirR 20 44
-----CATACACACACACATACACA----- mirR 20 33
-----CATACACACACACATACAC----- mirR 19 20
-----TACACACACACATACACACTCA----- mirR 22 12
-----ACACACACACATACACACTCA----- mirR 21 12
-----CATACACACACACATACACACTC----- mirR 23 12
-----CATACACACACACATACA----- mirR 18 12
-----TACACACACACATACACACTC----- mirR 21 6
-----CATACACACACACATACACT----- mirR 22 4
-----ACACACACACATACACACTC----- mirR 20 4
-----ACATACACACACACATAC----- mirR 18 4
-----TACATACACACACACATAC----- mirR 19 3
-----ACATACACACACACATACACA----- mirR 21 1
-----TACATACACACACACATACAC----- mirR 21 1
-----ACTCATGTAACACACACA----- morR 18 2
-----ACTCATGTAACACACACAC----- morR 19 2
-----ATGTAACACACACACACAC----- morR 19 2
-----CATGTAACACACACACACACA----- morR 21 1
-----CTCATGTAACACACACACACAC----- morR 22 1
-----CACTCATGTAACACACAC----- morR 18 1
-----TGTAACACACACACACACACA----- morR 21 1
-----CACTCATGTAACACACACA----- morR 19 1
-----ATGTAACACACACACACACAC----- morR 23 1
-----ACTCATGTAACACACACACAC----- morR 21 1
-----CTCATGTAACACACACAC----- morR 18 1
-----TGTAACACACACACACACACAC----- morR 24 1

```



```
-----ATGTAACACACACACACACAC----- morR 21 1
-----CATGTAACACACACACACACAC----- morR 22 1
-----TGTAACACACACACACACA----- morR 19 1
-----CATGTAACACACACACAC----- morR 18 1
```

>mmu-mir-871

| Sequence                                                              | species | len | reads |
|-----------------------------------------------------------------------|---------|-----|-------|
| TGTGAGTTGTGTGCAGTGCTCTATTTCAGATTAGTGCCAGTCATGTGAAATACATATGACTGGCACCAT | morL    | 19  | 5     |
| TGTGAGTTGTGTGCAGTGC-----                                              | morL    | 18  | 2     |
| -GTGAGTTGTGTGCAGTGC-----                                              | morL    | 18  | 2     |
| ----AGTTGTGTGCAGTGCTCT-----                                           | mirL    | 21  | 161   |
| -----TATTCAGATTAGTGCCAGTCA-----                                       | mirL    | 22  | 71    |
| -----TATTCAGATTAGTGCCAG-----                                          | mirL    | 18  | 59    |
| -----TATTCAGATTAGTGCCAGTC-----                                        | mirL    | 20  | 56    |
| -----TATTCAGATTAGTGCCAGT-----                                         | mirL    | 19  | 53    |
| -----ATTCAGATTAGTGCCAGTCAT-----                                       | mirL    | 21  | 25    |
| -----ATTCAGATTAGTGCCAGTCA-----                                        | mirL    | 20  | 22    |
| -----ATTCAGATTAGTGCCAGT-----                                          | mirL    | 18  | 18    |
| -----TTCAGATTAGTGCCAGTCAT-----                                        | mirL    | 20  | 16    |
| -----TCAGATTAGTGCCAGTCAT-----                                         | mirL    | 19  | 16    |
| -----TATTCAGATTAGTGCCAGTCATG-----                                     | mirL    | 23  | 13    |
| -----TCAGATTAGTGCCAGTCA-----                                          | mirL    | 18  | 9     |
| -----TTCAGATTAGTGCCAGTC-----                                          | mirL    | 18  | 8     |
| -----TTCAGATTAGTGCCAGTCA-----                                         | mirL    | 19  | 6     |
| -----ATTCAGATTAGTGCCAGTC-----                                         | mirL    | 19  | 4     |
| -----TCAGATTAGTGCCAGTCATGT-----                                       | mirL    | 21  | 3     |
| -----ATTCAGATTAGTGCCAGTCATG-----                                      | mirL    | 22  | 2     |
| -----TATTCAGATTAGTGCCAGTCATGTG-----                                   | mirL    | 25  | 1     |
| -----ATTCAGATTAGTGCCAGTCATGT-----                                     | mirL    | 23  | 1     |
| -----ACATATGACTGGCACCAT-----                                          | mirR    | 18  | 5     |

>mmu-mir-3061

| Sequence                                                                               | species | len | reads |
|----------------------------------------------------------------------------------------|---------|-----|-------|
| GCAGTGGGCCGTGAAAGGTAGCCTGGTGGTCCCCTTTGAGCTAAGGCTACCTTTGATAGTCCACTGCCCCACGGTGATGCATTGGT | mirL    | 20  | 78    |
| -CAGTGGGCCGTGAAAGGTAG-----                                                             | mirL    | 21  | 55    |
| -CAGTGGGCCGTGAAAGGTAGC-----                                                            | mirL    | 22  | 48    |
| -CAGTGGGCCGTGAAAGGTAGCC-----                                                           | mirL    | 24  | 10    |
| -CAGTGGGCCGTGAAAGGTAGCCT-----                                                          | mirL    | 23  | 8     |
| -CAGTGGGCCGTGAAAGGTAGCCTGG-----                                                        | mirL    | 25  | 4     |
| -CAGTGGGCCGTGAAAGGT-----                                                               | mirL    | 18  | 4     |
| GCAGTGGGCCGTGAAAGG-----                                                                | mirL    | 18  | 1     |
| --AGTGGGCCGTGAAAGGTAGCCT-----                                                          | mirL    | 22  | 1     |
| ---GTGGGCCGTGAAAGGTAGCC-----                                                           | mirL    | 20  | 1     |
| -----CTACCTTTGATAGTCCACTGCC-----                                                       | mirR    | 22  | 113   |
| -----CTACCTTTGATAGTCCACTGC-----                                                        | mirR    | 21  | 73    |
| -----CTACCTTTGATAGTCCACTGCC-----                                                       | mirR    | 23  | 67    |

```

-----CTACCTTTGATAGTCCAC----- mirR 18 30
-----CTACCTTTGATAGTCCACTG----- mirR 20 24
-----CTACCTTTGATAGTCCACTGCCCC----- mirR 24 13
-----CTACCTTTGATAGTCCACT----- mirR 19 9
-----GCTACCTTTGATAGTCCACTGC----- mirR 22 4
-----GCTACCTTTGATAGTCCACTGCC----- mirR 23 2
-----ACCTTTGATAGTCCACTGCC----- mirR 20 1
-----CCACGGTGCATGCATTGGT morR 19 1

```

>mmu-mir-1895

| sequence                                                                                               | species | len | reads |
|--------------------------------------------------------------------------------------------------------|---------|-----|-------|
| CAGGGCACGCAGACCCCACACCTTTTCCTCTTCTTCTTGGCCGGGTTGGCTCCGCCAGCTCCCCCGAGGAGGACGAGGAGGAGGAGGAATGATTCTGCGGGC | morL    | 18  | 1     |
| -AGGGCACGCAGACCCCAC-                                                                                   | morL    | 18  | 1     |
| ---GCACGCAGACCCCACACC---                                                                               | morL    | 18  | 1     |
| CAGGGCACGCAGACCCCA                                                                                     | morL    | 18  | 1     |
| CAGGGCACGCAGACCCCACA                                                                                   | morL    | 20  | 1     |
| -----CTTTTCCTCTTCTTCTTGG-----                                                                          | mirL    | 19  | 3     |
| -----CACCTTTTCCTCTTCTTCT-----                                                                          | mirL    | 19  | 2     |
| -----CTTTTCCTCTTCTTCTTG-----                                                                           | mirL    | 18  | 2     |
| -----CCTTTTCCTCTTCTTCTT-----                                                                           | mirL    | 18  | 1     |
| -----TTCTCTTCTTCTTGGCC-----                                                                            | mirL    | 18  | 1     |
| -----TTTTTCCTCTTCTTCTTGG-----                                                                          | mirL    | 18  | 1     |
| -----CCGGTTGGCTCCGCCAG-----                                                                            | loop    | 18  | 1     |
| -----CCCCGAGGAGGACGAGGAGGA-----                                                                        | mirR    | 22  | 396   |
| -----CCCCGAGGAGGACGAGGAGGAG-----                                                                       | mirR    | 23  | 37    |
| -----CCCCGAGGAGGACGAGGAG-----                                                                          | mirR    | 20  | 15    |
| -----CCCCGAGGAGGACGAGGA-----                                                                           | mirR    | 19  | 14    |
| -----CCCCGAGGAGGACGAGGAGGA-----                                                                        | mirR    | 21  | 11    |
| -----CCCCGAGGAGGACGAGG-----                                                                            | mirR    | 18  | 8     |
| -----CCCCGAGGAGGACGAGGAGG-----                                                                         | mirR    | 21  | 8     |
| -----CCCCGAGGAGGACGAGGAG-----                                                                          | mirR    | 19  | 7     |
| -----CCCCGAGGAGGACGAGGAGGAGGA-----                                                                     | mirR    | 28  | 5     |
| -----CCGAGGAGGACGAGGAGGA-----                                                                          | mirR    | 19  | 3     |
| -----CCCCGAGGAGGACGAGGAGGAG-----                                                                       | mirR    | 25  | 2     |
| -----CCCCGAGGAGGACGAGGAGGAG-----                                                                       | mirR    | 22  | 2     |
| -----TCCCCCGAGGAGGACGA-----                                                                            | mirR    | 18  | 2     |
| -----CCGAGGAGGACGAGGAGGAGGA-----                                                                       | mirR    | 25  | 2     |
| -----CCGAGGAGGACGAGGAGGAG-----                                                                         | mirR    | 23  | 2     |
| -----CCCCGAGGAGGACGAGGA-----                                                                           | mirR    | 18  | 2     |
| -----CCGAGGAGGACGAGGAGGAGGA-----                                                                       | mirR    | 22  | 2     |
| -----CCCCGAGGAGGACGAGGAGGAG-----                                                                       | mirR    | 23  | 1     |
| -----CCCGAGGAGGACGAGGAG-----                                                                           | mirR    | 18  | 1     |
| -----CCCCGAGGAGGACGAGGAGGAG-----                                                                       | mirR    | 21  | 1     |
| -----CCCGAGGAGGACGAGGAGGAG-----                                                                        | mirR    | 24  | 1     |
| -----CCCCCGAGGAGGACGAGGAGGA-----                                                                       | mirR    | 23  | 1     |
| -----CCCGAGGAGGACGAGGAGGA-----                                                                         | mirR    | 20  | 1     |
| -----CCCCGAGGAGGACGAGGAGG-----                                                                         | mirR    | 20  | 1     |

```
-----AGGAATGATTCTGCGGGC morR 18 2
-----GGAGGAGGAATGATTCTG----- morR 18 1

>mmu-mir-1938
GGAGACCCCGCCTGGGGCGCGGTGGGACTTGTAGTTCGGTCTTCGCTTCGGACGCCCAAGTCTGCATAGCGCGTGGTACGGCTGAACTGCAGTTCCCATCATGCCCTGGGACT species len reads
--AGACCCCGCCTGGGGCG----- morL 18 1
GGAGACCCCGCCTGGGGC----- morL 19 1
GGAGACCCCGCCTGGGG----- morL 18 1
-----CGGTGGGACTTGTAGTTCGG----- mirL 20 198
-----CGGTGGGACTTGTAGTTCGGTC----- mirL 22 102
-----CGGTGGGACTTGTAGTTCG----- mirL 19 98
-----CGGTGGGACTTGTAGTTCGGTCT----- mirL 23 71
-----CGGTGGGACTTGTAGTTCGGT----- mirL 21 27
-----CGGTGGGACTTGTAGTTC----- mirL 18 7
-----GGTGGGACTTGTAGTTCGG----- mirL 19 6
-----GGTGGGACTTGTAGTTCG----- mirL 18 6
-----TGGGACTTGTAGTTCGGT----- mirL 18 3
-----CGGTGGGACTTGTAGTTCGGTCTTC----- mirL 25 3
-----GTGGGACTTGTAGTTCGGT----- mirL 19 2
-----GGTGGGACTTGTAGTTCGGTCT----- mirL 22 1
-----GCGGTGGGACTTGTAGTTCG----- mirL 20 1
-----GGTGGGACTTGTAGTTCGGTC----- mirL 21 1
-----TGGGACTTGTAGTTCGGTC----- mirL 19 1
-----CGGCTGAACTGCAGTTCC----- mirR 18 3
-----GCTGAACTGCAGTTCCCA----- mirR 18 2
-----CGGCTGAACTGCAGTTCCC----- mirR 19 2
-----GGCTGAACTGCAGTTCCC----- mirR 18 1
-----CCATCATGCCCTGGGACT morR 18 1
-----CCCATCATGCCCTGGGAC- morR 18 1
```

```
>mmu-mir-1946b
CCGGAGTGCTGGGATTAAGCGGTGCGCCACCACTGCCAGCTTTCAGAGTGAATTTGAGGCTATCTGGCTATATGAGACTGCTTCACAGGGTAAGAAAAGGGGAAAGTGCCCGGCAGTGGTGGCACATGCTTTTAAATCCC
--GGAGTGCTGGGATTAAGG-----
CCGGAGTGCTGGGATTAAG-----
-----CGTGCGCCACCACTGCCCA-----
-----TGCGCCACCACTGCCCAG-----
-----TGCGCCACCACTGCCCAGC-----
-----CGTGCGCCACCACTGCCCAG-----
-----TGCGCCACCACTGCCCAGCTT-----
-----TGCGCCACCACTGCCCAGCT-----
-----GTGCGCCACCACTGCCCA-----
-----GTGCGCCACCACTGCCCAGC-----
-----GTGCGCCACCACTGCCCAG-----
-----CGTGCGCCACCACTGCCC-----
-----GTGCGCCACCACTGCCCAGCT-----
-----TGCGCCACCACTGCCCAGC-----
-----CGTGCGCCACCACTGCCCAGC-----
```

```
-----GCGCCACCACTGCCAGC-----  
-----CGTGCGCCACCACTGCCAGCT-----  
-----GCGTGCGCCACCACTGCC-----  
-----AGGCGTGCGCCACCACTGCC-----  
-----GCGTGCGCCACCACTGCC-----  
-----GCGTGCGCCACCACTGCCAGCT-----  
-----GGCGTGCGCCACCACTGC-----  
-----TGCGCCACCACTGCCAGCTTTC-----  
-----AGGCGTGCGCCACCACTG-----  
-----AGGCGTGCGCCACCACTGCCAG-----  
-----GCCGGGCAGTGGTGGCACATGCTTTT-----  
-----GCCGGGCAGTGGTGGCACAT-----  
-----GCCGGGCAGTGGTGGCACATGCTTT-----  
-----GCCGGGCAGTGGTGGCACATGCTTTTA-----  
-----GCCGGGCAGTGGTGGCACATGC-----  
-----GCCGGGCAGTGGTGGCACATGCTT-----  
-----GCCGGGCAGTGGTGGCACATG-----  
-----CCGGGCAGTGGTGGCACATGCTTTT-----  
-----TGCCGGGCAGTGGTGGCACAT-----  
-----CCGGGCAGTGGTGGCACATGC-----  
-----CCGGGCAGTGGTGGCACATGCTTT-----  
-----TGCCGGGCAGTGGTGGCACATGCTTTT-----  
-----GGGCAGTGGTGGCACATG-----  
-----GGGCAGTGGTGGCACATGCTTT-----  
-----CCGGGCAGTGGTGGCACATGCTTTTAAT-----  
-----GGGCAGTGGTGGCACATGCTTTTAATCC-----  
-----CCGGGCAGTGGTGGCACAT-----  
-----GGGCAGTGGTGGCACATGCTTTT-----  
-----CGGGCAGTGGTGGCACAT-----  
-----TGCCGGGCAGTGGTGGCACATGC-----  
-----AATCCC-----  
-----TTAATCCC-----  
-----TTTAATCCC-----  
-----CCC-----  
-----CCC-----  
-----ATCCC-----  
-----AATCCC-----  
-----TAATCCC-----  
-----ATCCC-----  
-----TAATCCC-----
```

```
>mmu-mir-1961  
CTAGCCATATCTGAAGTTCAACACGCCCTCCCCTCTTCTTACGTCTATGGAGGATTTACCTCCATATACCTTGAGAGATGAGGTAGTAGTTAGAACTTTCATGGAGCAAAAAGCATT species len reads  
-TAGCCATATCTGAAGTTCA----- mirL 19 24  
-TAGCCATATCTGAAGTTCAA----- mirL 20 8  
CTAGCCATATCTGAAGTTCA----- mirL 20 4
```

```

-TAGCCATATCTGAAGTTCAAC----- mirL 21 2
CTAGCCATATCTGAAGTTCAAC----- mirL 22 2
-TAGCCATATCTGAAGTTC----- mirL 18 1
CTAGCCATATCTGAAGTTC----- mirL 19 1
-----TGAGGTAGTAGTTAGAACT----- mirR 19 227
-----TGAGGTAGTAGTTAGAAC----- mirR 18 125
-----TGAGGTAGTAGTTAGAACTTT----- mirR 21 82
-----TGAGGTAGTAGTTAGAACTT----- mirR 20 35
-----AGATGAGGTAGTAGTTAGAAC----- mirR 21 9
-----GAGGTAGTAGTTAGAACT----- mirR 18 7
-----TGAGGTAGTAGTTAGAACTTTC----- mirR 22 2
-----GGTAGTAGTTAGAACTTT----- mirR 18 2
-----ATGAGGTAGTAGTTAGAACT----- mirR 20 1
-----GAGGTAGTAGTTAGAACTTT----- mirR 20 1
-----CATGGAGCAAAAAGCATTT morR 19 1

```

>mmu-mir-466c-2

```

CCCTACGTATGTGTATATGTGTTGATGTGTGTGTCATGTACATATGTGAATATGATATACATATACATACACGCACACATAAGACACATATGAGCACACAGACACAGGGGAATGGCACTCGTCAATCCATT species
--CTACGTATGTGTATATGTG----- morL 19
---ACGTATGTGTATATGTGTT----- morL 19
--CTACGTATGTGTATATGTGT----- morL 20
CCCTACGTATGTGTATATGTGT----- morL 22
---ACGTATGTGTATATGTGT----- morL 18
-----GATGTGTGTGTGCATGTACAT----- mirL 21
-----GATGTGTGTGTGCATGTAC----- mirL 19
-----TGATGTGTGTGTGCATGTAC----- mirL 20
-----TGATGTGTGTGTGCATGTACAT----- mirL 22
-----GATGTGTGTGTGCATGTACA----- mirL 20
-----TGATGTGTGTGTGCATGTACA----- mirL 21
-----GATGTGTGTGTGCATGTA----- mirL 18
-----GATGTGTGTGTGCATGTACATA----- mirL 22
-----TGATGTGTGTGTGCATGTA----- mirL 19
-----GATGTGTGTGTGCATGTACATAT----- mirL 23
-----TGATGTGTGTGTGCATGT----- mirL 18
-----ATGTGTGTGTGCATGTAC----- mirL 18
-----ATGTGTGTGTGCATGTACA----- mirL 19
-----TGATGTGTGTGTGCATGTACATAT----- mirL 24
-----ATGTGTGTGTGCATGTACATAT----- mirL 22
-----ATGTGTGTGTGCATGTACATA----- mirL 21
-----TTGATGTGTGTGTGCATGTA----- mirL 20
-----TTGATGTGTGTGTGCATGTAC----- mirL 21
-----GATGTGTGTGTGCATGTACATATGT----- mirL 25
-----ACAGACACAGGGGAATGGC----- mirR 19
-----CACACAGACACAGGGGAAT----- mirR 19
-----CACACAGACACAGGGGAA----- mirR 18
-----CAGACACAGGGGAATGGC----- mirR 18

```

```

-----GGCACTCGTCAATCCATT morR 18

>mmu-mir-466c-1
TTGATGTGTGTGTCATGTACATATGTGAATATGATATACATATACATACACGCACACATAAGACACATATGAGCACACAGACACAGGGGAATGGC species len reads
--GATGTGTGTGTCATGTACAT----- mirL 21 104
--GATGTGTGTGTCATGTAC----- mirL 19 100
-TGATGTGTGTGTCATGTAC----- mirL 20 96
-TGATGTGTGTGTCATGTACAT----- mirL 22 67
--GATGTGTGTGTCATGTACA----- mirL 20 48
-TGATGTGTGTGTCATGTACA----- mirL 21 20
--GATGTGTGTGTCATGTA----- mirL 18 16
--GATGTGTGTGTCATGTACATA----- mirL 22 11
-TGATGTGTGTGTCATGTA----- mirL 19 9
--GATGTGTGTGTCATGTACATAT----- mirL 23 7
-TGATGTGTGTGTCATGT----- mirL 18 6
---ATGTGTGTGTCATGTACA----- mirL 19 5
---ATGTGTGTGTCATGTAC----- mirL 18 5
---ATGTGTGTGTCATGTACATAT----- mirL 22 2
-TGATGTGTGTGTCATGTACATAT----- mirL 24 2
--GATGTGTGTGTCATGTACATATGT----- mirL 25 1
---ATGTGTGTGTCATGTACATA----- mirL 21 1
TTGATGTGTGTGTCATGTAC----- mirL 21 1
TTGATGTGTGTGTCATGTA----- mirL 20 1
-----ACAGACACAGGGGAATGGC mirR 19 3
-----CACACAGACACAGGGGAAT--- mirR 19 3
-----CACACAGACACAGGGGAA--- mirR 18 2
-----CAGACACAGGGGAATGGC mirR 18 1

>mmu-mir-201
GATGCTGTGTACAGTACCTTACTCAGTAAGGCATTGTTCTTCTATATTAATAAAATGAACAGTGCCTTCTGTAGGGTAATGTGCAACATGGACAACATTTGT species len reads
GATGCTGTGTACAGTACCT----- morL 19 3
-ATGCTGTGTACAGTACCT----- morL 18 1
-----TACTCAGTAAGGCATTGTTC----- mirL 20 104
-----ACTCAGTAAGGCATTGTTCTT----- mirL 21 76
-----TACTCAGTAAGGCATTGTCT----- mirL 21 75
-----TACTCAGTAAGGCATTGT----- mirL 18 54
-----ACTCAGTAAGGCATTGTTCT----- mirL 20 40
-----ACTCAGTAAGGCATTGTTTC----- mirL 19 38
-----TACTCAGTAAGGCATTGTT----- mirL 19 37
-----TACTCAGTAAGGCATTGTTCTT----- mirL 22 15
-----TCAGTAAGGCATTGTTCT----- mirL 18 10
-----CTCAGTAAGGCATTGTTCT----- mirL 19 9
-----ACTCAGTAAGGCATTGTT----- mirL 18 8
-----ACTCAGTAAGGCATTGTTCTTC----- mirL 22 4
-----TACTCAGTAAGGCATTGTTCTTC----- mirL 23 3
-----CTCAGTAAGGCATTGTTC----- mirL 18 2

```

```

-----TCAGTAAGGCATTGTTCTTC----- mirL 20 2
-----ACTCAGTAAGGCATTGTTCTTCT----- mirL 23 1
-----CTCAGTAAGGCATTGTTCTT----- mirL 20 1
-----TACTCAGTAAGGCATTGTTCTTCTATAT----- mirL 28 1
-----TTCTGTGTAGGGTAATGT----- mirR 18 13
-----TTCTGTGTAGGGTAATGTGC----- mirR 20 1
-----CCTTTCTGTGTAGGGTAA----- mirR 18 1
-----GTGCAACATGGACAACATT--- morR 19 1
-----GTGCAACATGGACAACATTTGT morR 22 1

```

>mmu-mir-3057

```

GCATTGGAGCTGAGATTCTGCGGGATGGATTAGGAGTATATTGTCTCCACAGGCCAGCTCATAGCACAAAGCCATCGGCCAGGCC species len reads
--ATTGGAGCTGAGATTCTGCGG----- mirL 21 35
--ATTGGAGCTGAGATTCTGCGGG----- mirL 22 18
--ATTGGAGCTGAGATTCTGCGGGATG----- mirL 25 17
--ATTGGAGCTGAGATTCTGCG----- mirL 20 16
--ATTGGAGCTGAGATTCTGCGGGAT----- mirL 24 14
--ATTGGAGCTGAGATTCTG----- mirL 18 12
--ATTGGAGCTGAGATTCTGCGGGA----- mirL 23 12
GCATTGGAGCTGAGATTC----- mirL 18 1
---TTGGAGCTGAGATTCTGCGG----- mirL 20 1
-----TCCACAGGCCAGCTCATAG----- mirR 21 77
-----TCCACAGGCCAGCTCATAGC----- mirR 22 71
-----CTCCACAGGCCAGCTCATAGC----- mirR 23 41
-----CTCCACAGGCCAGCTCATAG----- mirR 22 35
-----CTCCACAGGCCAGCTCAT----- mirR 20 35
-----TCCACAGGCCAGCTCAT----- mirR 19 33
-----TCCACAGGCCAGCTCATA----- mirR 20 28
-----TCCACAGGCCAGCTCATAGCA----- mirR 23 7
-----CTCCACAGGCCAGCTCATA----- mirR 21 7
-----CCTCCACAGGCCAGCTCAT----- mirR 21 6
-----TCCACAGGCCAGCTCA----- mirR 18 6
-----CCCACAGGCCAGCTCAT----- mirR 18 4
-----TCCACAGGCCAGCTCATAGCAC----- mirR 24 4
-----CTCCACAGGCCAGCTCA----- mirR 19 3
-----CTCCACAGGCCAGCTC----- mirR 18 2
-----CCCACAGGCCAGCTCATA----- mirR 19 2
-----CTCCACAGGCCAGCTCATAGCA----- mirR 24 2
-----CCTCCACAGGCCAGCTC----- mirR 19 1
-----CCTCCACAGGCCAGCTCATA----- mirR 22 1
-----CCCACAGGCCAGCTCATAGC----- mirR 21 1
-----ACAAGCCATCGGCCAGGCC morR 19 1
-----GCACAAGCCATCGGCCAG--- morR 18 1

```

>mmu-mir-1912

```

ATGTGCTCATGTCATGGGCTGTGTAGATTTTTATTTAATACACAGAACATGCAGTGAGAACTTGATAGAGATTGGAAG species len reads

```

```
---TGCTCATTGCATGGGCTGTGTAG----- mirL 23 70
---TGCTCATTGCATGGGCTGTGT----- mirL 21 38
---TGCTCATTGCATGGGCTGTGTA----- mirL 22 15
---TGCTCATTGCATGGGCTGT----- mirL 19 5
---TGCTCATTGCATGGGCTGTGTAGAT----- mirL 25 4
---TGCTCATTGCATGGGCTGTGTAGA----- mirL 24 2
ATGTGCTCATTGCATGGG----- mirL 18 1
---GCTCATTGCATGGGCTGTGTAG----- mirL 22 1
---CTCATTGCATGGGCTGTGT----- mirL 19 1
---TGCTCATTGCATGGGCTGTG----- mirL 20 1
ATGTGCTCATTGCATGGGC----- mirL 19 1
-TGTGCTCATTGCATGGGC----- mirL 18 1
---GCTCATTGCATGGGCTGTGT----- mirL 20 1
-----TAGATTTTTATTTAATAC----- loop 18 21
-----TAGATTTTTATTTAATACA----- loop 19 14
-----CACAGAACATGCAGTGAGAACT----- mirR 22 113
-----CACAGAACATGCAGTGAGAAC----- mirR 21 79
-----CACAGAACATGCAGTGAGAA----- mirR 20 48
-----CACAGAACATGCAGTGAGA----- mirR 19 30
-----CACAGAACATGCAGTGAGAACTT----- mirR 23 21
-----CACAGAACATGCAGTGAG----- mirR 18 7
-----CACAGAACATGCAGTGAGAACTTG----- mirR 24 4
-----CAGAACATGCAGTGAGAACT----- mirR 20 2
-----CAGAACATGCAGTGAGAA----- mirR 18 2
-----ACAGAACATGCAGTGAGAA----- mirR 19 2
-----ATACACAGAACATGCAGTGAG----- mirR 21 1
-----ACAGAACATGCAGTGAGAACT----- mirR 21 1
-----TACACAGAACATGCAGTGAG----- mirR 20 1
-----ATACACAGAACATGCAGT----- mirR 18 1
-----CTTGATAGAGATTGGAAG morR 18 3

>mmu-mir-1196
CTATGCTGGTCTTGAACCTCACAGAACTACCTGCCTCTGCCTTCCAAGTACTGGGCAGTGTGCCACAAAACCTACATTTTTGCTGGGCTGGGGGTGAGGGTGGTTTTTTTTTTTTTAAATACAAAATGCAATCGATG
-----CTGGTCTTGAACCTCACAG-----
--ATGCTGGTCTTGAACCTCA-----
CTATGCTGGTCTTGAACCTCAC-----
-----AAATCTACCTGCCTCTGCCT-----
-----AAATCTACCTGCCTCTGCCT-----
-----AAATCTACCTGCCTCTGCC-----
-----AATCTACCTGCCTCTGCCT-----
-----AAATCTACCTGCCTCTGCCTTC-----
-----GAAATCTACCTGCCTCTGCCT-----
-----AAATCTACCTGCCTCTGCCTTCC-----
-----AAATCTACCTGCCTCTGC-----
-----GAAATCTACCTGCCTCTGC-----
-----AAATCTACCTGCCTCTGCCTTCCAAGTAC-----
```



-----ATCTACCTGCCTCTGCCT-----  
-----AATCTACCTGCCTCTGCCTT-----  
-----AGAAATCTACCTGCCTCTG-----  
-----AATCTACCTGCCTCTGCCTTCCA-----  
-----AATCTACCTGCCTCTGCCT-----  
-----GAAATCTACCTGCCTCTGCC-----  
-----AATCTACCTGCCTCTGCCTTCCAAG-----  
-----TCTACCTGCCTCTGCCTTCCAAG-----  
-----TCTACCTGCCTCTGCCTT-----  
-----AGAAATCTACCTGCCTCTGCC-----  
-----CAGAAATCTACCTGCCTC-----  
-----TCTACCTGCCTCTGCCTTCCA-----  
-----AGAAATCTACCTGCCTCTGCCT-----  
-----TCTACCTGCCTCTGCCTTCC-----  
-----CAATCGATG-----  
-----GCAATCGATG-----  
-----TCGATG-----  
-----ATGCAATCGATG-----  
-----

>mmu-mir-466f-1

|                                                                                                   | species | len | reads |
|---------------------------------------------------------------------------------------------------|---------|-----|-------|
| CATATGTATGTGCATGTGTGTTTACGTGTGTGTGCATGTGCATGTGTGTATATGAATATACATACACATACACACACATGCAACACACACATATGAA | morL    | 19  | 9     |
| -----TATGTGCATGTGTGTTTAC-----                                                                     | morL    | 21  | 9     |
| ---TGATGTGCATGTGTGTTTAC---                                                                        | morL    | 18  | 4     |
| -----ATGTGCATGTGTGTTTAC-----                                                                      | morL    | 20  | 2     |
| ----TATGTGCATGTGTGTTTACG---                                                                       | morL    | 18  | 2     |
| -----TATGTGCATGTGTGTTTA-----                                                                      | morL    | 20  | 1     |
| CATATGTATGTGCATGTGTG-----                                                                         | morL    | 21  | 1     |
| -----GTATGTGCATGTGTGTTTACG-----                                                                   | mirL    | 22  | 106   |
| -----ACGTGTGTGTGCATGTGCATGT-----                                                                  | mirL    | 21  | 26    |
| -----TACGTGTGTGTGCATGTGCAT-----                                                                   | mirL    | 21  | 15    |
| -----ACGTGTGTGTGCATGTGCATG-----                                                                   | mirL    | 22  | 12    |
| -----TACGTGTGTGTGCATGTGCATG-----                                                                  | mirL    | 19  | 10    |
| -----ACGTGTGTGTGCATGTGCA-----                                                                     | mirL    | 20  | 8     |
| -----ACGTGTGTGTGCATGTGCAT-----                                                                    | mirL    | 23  | 6     |
| -----ACGTGTGTGTGCATGTGCAITG-----                                                                  | mirL    | 18  | 6     |
| -----ACGTGTGTGTGCATGTGC-----                                                                      | mirL    | 23  | 2     |
| -----TACGTGTGTGTGCATGTGCATGT-----                                                                 | mirL    | 18  | 2     |
| -----TACGTGTGTGTGCATGTG-----                                                                      | mirL    | 20  | 1     |
| -----TACGTGTGTGTGCATGTGCA-----                                                                    | mirL    | 19  | 1     |
| -----TACGTGTGTGTGCATGTGC-----                                                                     | mirL    | 19  | 1     |
| -----CGTGTGTGTGCATGTGCAT-----                                                                     | mirL    | 21  | 1     |
| -----TTTACGTGTGTGTGCATGTGC-----                                                                   | mirL    | 21  | 1     |
| -----CGTGTGTGTGCATGTGCATGT-----                                                                   | mirL    | 21  | 1     |
| -----TTTACGTGTGTGTGCATGTG-----                                                                    | mirL    | 20  | 1     |

```
-----TTACGTGTGTGTGCATGTGC----- mirL 20 1
-----CATAACACACACATACACAC----- mirR 21 100
-----CATAACACACACATACACA----- mirR 20 33
-----ATACACACACACATACACAC----- mirR 22 24
-----CATAACACACACATACAC----- mirR 19 20
-----CATAACACACACATACA----- mirR 18 12
-----TACACACACACATACACAC----- mirR 21 7
-----CATAACACACACATACACACA----- mirR 22 6
-----CATAACACACACATACACAC----- mirR 23 6
-----CACATACACACACATACACAC----- mirR 23 4
-----CACATACACACACATACAC----- mirR 21 4
-----ACATACACACACACATACAC----- mirR 22 4
-----TACACACACACATACACACA----- mirR 22 3
-----ATACACACACACATACACACA----- mirR 21 3
-----ACACACACACATACACACA----- mirR 19 3
-----TACACACACACATACACACA----- mirR 20 3
-----CACATACACACACATAC----- mirR 19 3
-----ACACACACACATACACACA----- mirR 21 2
-----ACACACACACATACACAC----- mirR 20 2
-----ACATACACACACATAC----- mirR 18 2
-----ACATACACACACATACACAC----- mirR 24 1
-----ACATACACACACACATACAC----- mirR 24 1
-----CACATACACACACATACACACA----- mirR 24 1
-----ATACACACACACATACACACA----- mirR 23 1
-----ACATACACACACATACAC----- mirR 20 1
-----ACATACACACACATACACA----- mirR 21 1
-----CACATACACACACATA----- mirR 18 1
-----CACATGCAACACACAC----- morR 18 2
-----CACATGCAACACACACA----- morR 19 1
-----ACATGCAACACACACATA----- morR 18 1
-----ATGCAACACACACATATGAA----- morR 20 1
```

>mmu-mir-3473

```
CAGTCGGGTGCTCTTACCTGTTGAGCCATCTCACCAGCCCAGAAAATATTTTTAAAAAGTGAATTGTCTTAAGCTGGAGAGATGGCTCAGCAGTTAAGAGCACTGACTGCTCTTCCAGAGGTCCTGAGTTCAATTCTCAGC
-AGTCGGGTGCTCTTACCT-----
CAGTCGGGTGCTCTTACCTGTTGA-----
-----GAGCCATCTCACCAGCCC-----
-----TGAGCCATCTCACCAGCC-----
-----TGAGCCATCTCACCAGCCC-----
-----AGCCATCTCACCAGCCCAG-----
-----AGCCATCTCACCAGCCCA-----
-----TGAGCCATCTCACCAGCCCAGA-----
-----GCCATCTCACCAGCCCAG-----
-----GTTGAGCCATCTCACCAGCC-----
-----GTTGAGCCATCTCACCAGCCC-----
-----GAGCCATCTCACCAGCCCA-----
```

-----TGAGCCATCTCACCAGCCCAG-----  
-----GTTGAGCCATCTCACCAG-----  
-----GTTGAGCCATCTCACCAGC-----  
-----AGCCATCTCACCAGCCCAGA-----  
-----GAGCCATCTCACCAGCCCAGA-----  
-----AGCCATCTCACCAGCCCAGAAA-----  
-----GAGCCATCTCACCAGCCCAG-----  
-----TGAGCCATCTCACCAGCCCA-----  
-----TTGAGCCATCTCACCAGCC-----  
-----TTGAGCCATCTCACCAGC-----  
-----GAGCCATCTCACCAGCCCAGAA-----  
-----TGAGCCATCTCACCAGCCCAGAAA-----  
-----CCATCTCACCAGCCCAGA-----  
-----CCATCTCACCAGCCCAGAAAA-----  
-----GCCATCTCACCAGCCCAGAA-----  
-----GCCATCTCACCAGCCCAGA-----  
-----AGCCATCTCACCAGCCCAGAA-----  
-----AGCCATCTCACCAGCCCAGAAAAT-----  
-----GTTGAGCCATCTCACCAGCCCA-----  
-----AGCCATCTCACCAGCCCAGAAA-----  
-----GCCATCTCACCAGCCCAGAAA-----  
-----TGAGCCATCTCACCAGCCCAGAA-----  
-----GCCATCTCACCAGCCCAGAAAA-----  
-----ACTGCTCTTCCAGAGGTCCTGA-----  
-----ACTGCTCTTCCAGAGGTCCTGAG-----  
-----TGACTGCTCTTCCAGAGGTCCTGA-----  
-----TGACTGCTCTTCCAGAGGTCCT-----  
-----ACTGCTCTTCCAGAGGTCCTG-----  
-----TGACTGCTCTTCCAGAGGTCC-----  
-----ACTGCTCTTCCAGAGGTCCTGAGT-----  
-----CTGACTGCTCTTCCAGAGGTCC-----  
-----ACTGCTCTTCCAGAGGTCCT-----  
-----GCTCTTCCAGAGGTCCTGAGT-----  
-----TGACTGCTCTTCCAGAGGTCCTG-----  
-----ACTGCTCTTCCAGAGGTCCTGAGTT-----  
-----TGACTGCTCTTCCAGAGGTCCTGAG-----  
-----TGACTGCTCTTCCAGAGG-----  
-----ACTGCTCTTCCAGAGGTCC-----  
-----CTGCTCTTCCAGAGGTCCTGAGT-----  
-----CTGACTGCTCTTCCAGAGGTC-----  
-----GCTCTTCCAGAGGTCCTGAGTTC-----  
-----TGCTCTTCCAGAGGTCCTGAG-----  
-----TGACTGCTCTTCCAGAGGTC-----  
-----GACTGCTCTTCCAGAGGT-----  
-----GCTCTTCCAGAGGTCCTG-----  
-----GACTGCTCTTCCAGAGGTCC-----

```
-----GACTGCTCTTCCAGAGGTCCT-----
-----CTGCTCTTCCAGAGGTCCTGA-----
-----TGCTCTTCCAGAGGTCCTGA-----
-----CTGCTCTTCCAGAGGTCCT-----
-----CTGCTCTTCCAGAGGTCCTGAGTTC-----
-----GCTCTTCCAGAGGTCCTGAGTTC AATTC-----
-----CTGACTGCTCTTCCAGAGGTCCT-----
-----CTGCTCTTCCAGAGGTCCTGAGTT-----
-----CTGACTGCTCTTCCAGAGGT-----
-----CTGCTCTTCCAGAGGTCCTG-----
-----GCTCTTCCAGAGGTCCTGAGTTC AATTC CAGC-----
-----CTGACTGCTCTTCCAGAGGTCCTGAG-----
-----CTGACTGCTCTTCCAGAGG-----
-----GACTGCTCTTCCAGAGGTCCTGA-----
-----GACTGCTCTTCCAGAGGTCCTGAGT-----
-----CTGACTGCTCTTCCAGAG-----
-----GACTGCTCTTCCAGAGGTCCTGAGTT-----
-----GACTGCTCTTCCAGAGGTC-----
-----AGTTC AATTC CAGC-----
-----GAGTTC AATTC CAGC-----
-----TGAGTTC AATTC CAGC-----
-----AGTTC AATTC CAGC-----
-----GTTCAATTC CAGC-----
```

>mmu-mir-1934

```
CCGAGCTGGGCCTTCTTTCTGGTCCCCTGCTTCGTCCTCTGTCCAGATGTTAAGAGGATGACGGTGGGGCTGGTGAGATGGCTCAGCGGTTAAGAGCGCCGATTGCTCTTCCAAAGGTA CTGAGTTC AATTC CAGCA sp
-CGAGCTGGGCCTTCTTTCT-
CCGAGCTGGGCCTTCTTT-
-----TCTGGTCCCCTGCTTCGTCCTCT-----
-----TCTGGTCCCCTGCTTCGTCCTC-----
-----TCTGGTCCCCTGCTTCGTCCT-----
-----TCTGGTCCCCTGCTTCGTCCTCTG-----
-----TCTGGTCCCCTGCTTCGTCCTCTGT-----
-----CTGGTCCCCTGCTTCGTCCTCT-----
-----TCTGGTCCCCTGCTTCGTCCTCTGTC-----
-----TTTCTGGTCCCCTGCTTCGTCCT-----
-----TTTCTGGTCCCCTGCTTCGTCCT-----
-----TTTCTGGTCCCCTGCTTCGTCCTC-----
-----GGTCCCCTGCTTCGTCCTCT-----
-----TGGTCCCCTGCTTCGTCCTCT-----
-----GGTCCCCTGCTTCGTCCTCTG-----
-----TTTCTGGTCCCCTGCTTCGTC-----
-----TGGTCCCCTGCTTCGTCCTC-----
-----CTGGTCCCCTGCTTCGTCCTC-----
-----CTGGTCCCCTGCTTCGTCCT-----
```

```
-----CTGGTCCCCTGCTTCGTCTCTG-----
-----CTGGTCCCCTGCTTCGTCC-----
-----TTTCTGGTCCCCTGCTTC-----
-----CTGGTCCCCTGCTTCGTCTCTGT-----
-----TTTCTGGTCCCCTGCTTCG-----
-----TTTCTGGTCCCCTGCTTCGTCTCT-----
-----TGGTCCCCTGCTTCGTCTCTG-----
-----TGAGTTCAAATCCCAGCA-----
-----TACTGAGTTCAAATCCCAGCA-----
-----ACTGAGTTCAAATCCCAGCA-----
-----CTGAGTTCAAATCCCAGCA-----
-----TACTGAGTTCAAATCCCA-----
-----TACTGAGTTCAAATCCCAGCA-----
-----ACTGAGTTCAAATCCCAGC-----
-----CTGAGTTCAAATCCCAGC-----
-----TACTGAGTTCAAATCCCAG-----
-----ACTGAGTTCAAATCCCAG-----
-----TGAGTTCAAATCCCAGCA-----
-----GAGTTCAAATCCCAGCA-----
-----AGTTCAAATCCCAGCA mi
-----GTTCAAATCCCAGCA mi
-----AGTTCAAATCCCAGCA- m
```

>mmu-mir-706

```
TACAGAGTGAGTTCCAGGACAGCCAGGGCTATACAGAGAAACCCTGTCTCAAAAAACAAAAACAAACAAAATTACTTTTAGTAGGTTTATTTTGTTTTTTGGATGGCTTTTTTTTTCCCTTACCCTATATTGTGAAGA
-----TTCCAGGACAGCCAGGGCTA-----
-----ACAGCCAGGGCTATACAG-----
-----GTTCCAGGACAGCCAGGGCTAT-----
-----CCAGGACAGCCAGGGCTATACA-----
-----TCCAGGACAGCCAGGGCTA-----
-----GTTCCAGGACAGCCAGGGCTA-----
-----CAGGACAGCCAGGGCTAT-----
-----CAGCCAGGGCTATACAGA-----
-----TTCCAGGACAGCCAGGGCTATAC-----
-----CCAGGACAGCCAGGGCTATACAGA-----
-----AGTGAGTTCCAGGACAGCCAGGGCTAT-----
-----AGGACAGCCAGGGCTATACAG-----
-----CAGGACAGCCAGGGCTATACAG-----
-----TTCCAGGACAGCCAGGGCTAT-----
-----GAGTTCCAGGACAGCCAGGGCTAT-----
-----AGGACAGCCAGGGCTATA-----
TACAGAGTGAGTTCCAGGACAGCCAGGGCTA-----
-----AGTTCCAGGACAGCCAGGGCTATAC-----
-----CAGGACAGCCAGGGCTATACAGA-----
-----AGTTCCAGGACAGCCAGGGCTAT-----
-----AGTGAGTTCCAGGACAGCCAGGGCTATACAG-----
```

```

-----ACAGCCAGGGCTATACAGA-----
-----CCAGGACAGCCAGGGCTA-----
-----AGAGAAACCCTGTCTCAAAAAA-----
-----AGAGAAACCCTGTCTCAAAAA-----
-----AGAGAAACCCTGTCTCAAAAAAC-----
-----AGAGAAACCCTGTCTCAAAA-----
-----AGAGAAACCCTGTCTCAAAA-----
-----GAAACCCTGTCTCAAAAAA-----
-----AGAAACCCTGTCTCAAAAAA-----
-----AGAAACCCTGTCTCAAAAA-----
-----GAAACCCTGTCTCAAAAA-----
-----AGAAACCCTGTCTCAAAA-----
-----AGAGAAACCCTGTCTCAAAAAACAA-----
-----GAAACCCTGTCTCAAAAAAC-----
-----AGAAACCCTGTCTCAAAAAAC-----
-----CAGAGAAACCCTGTCTCAAAAA-----
-----CAGAGAAACCCTGTCTCAAAAA-----
-----AGAGAAACCCTGTCTCAAAAAACA-----
-----GAAACCCTGTCTCAAAAAACAAA-----
-----GAGAAACCCTGTCTCAAAA-----
-----TACAGAGAAACCCTGTCT-----
-----GAAACCCTGTCTCAAAAAACA-----
-----CAGAGAAACCCTGTCTCAAAA-----
-----GAGAAACCCTGTCTCAAAAA-----
-----GAGAAACCCTGTCTCAAAAAAC-----
-----AGAAACCCTGTCTCAAAAAACA-----
-----TATTGTGAAGA-----
-----TATTGTGAAGA-----
-----

```

>mmu-mir-1964

| CTTAACCTTTCTTGCGAAGCTGGAGCACAAAAGCCGGTGCCGGTGTGATGCCTACCCGACTTCTGGGCTCCGGCTTTGGAAGGAAGGAGGTAGCC | species | len | reads |
|-------------------------------------------------------------------------------------------------|---------|-----|-------|
| -TTAACCTTTCTTGCGAAG-----                                                                        | morL    | 18  | 1     |
| CTTAACCTTTCTTGCGAA-----                                                                         | morL    | 18  | 1     |
| -----AGCTGGAGCACAAAAGCCGGTGC-----                                                               | mirL    | 23  | 60    |
| -----AGCTGGAGCACAAAAGCCGGT-----                                                                 | mirL    | 21  | 36    |
| -----AGCTGGAGCACAAAAGCCGG-----                                                                  | mirL    | 20  | 17    |
| -----AGCTGGAGCACAAAAGCCGGTG-----                                                                | mirL    | 22  | 6     |
| -----AGCTGGAGCACAAAAGCCGGTGCC-----                                                              | mirL    | 24  | 5     |
| -----AGCTGGAGCACAAAAGCCG-----                                                                   | mirL    | 19  | 5     |
| -----GAAGCTGGAGCACAAAAG-----                                                                    | mirL    | 18  | 5     |
| -----AGCTGGAGCACAAAAGCC-----                                                                    | mirL    | 18  | 3     |
| -----GAAGCTGGAGCACAAAAGC-----                                                                   | mirL    | 19  | 1     |
| -----TGGAGCACAAAAGCCGGT-----                                                                    | mirL    | 18  | 1     |
| -----CGGTGTGATGCCTACAC-----                                                                     | loop    | 18  | 1     |

```

-----CCGGTGTGATGCCTACACC----- loop 19 1
-----GGTGTGATGCCTACACCG----- loop 18 1
-----CCGACTTCTGGGCTCCGGCTTT----- mirR 22 167
-----CCGACTTCTGGGCTCCGGCTTTG----- mirR 23 35
-----CCGACTTCTGGGCTCCGGC----- mirR 19 25
-----CCGACTTCTGGGCTCCGGCTT----- mirR 21 16
-----CCGACTTCTGGGCTCCGGCTTTGG----- mirR 24 15
-----CCGACTTCTGGGCTCCGGCT----- mirR 20 12
-----CCGACTTCTGGGCTCCGG----- mirR 18 8
-----ACCGACTTCTGGGCTCCGGCTTTGG----- mirR 25 4
-----CGACTTCTGGGCTCCGGCTTT----- mirR 21 3
-----ACCGACTTCTGGGCTCCGGCTTTG----- mirR 24 2
-----ACCGACTTCTGGGCTCCGGCTTT----- mirR 23 2
-----ACCGACTTCTGGGCTCCGGCT----- mirR 21 1
-----ACCGACTTCTGGGCTCCGGC----- mirR 20 1
-----ACCGACTTCTGGGCTCCGGCTT----- mirR 22 1
-----CGACTTCTGGGCTCCGGCT----- mirR 19 1
-----GGAAGGAAGGAGGTAGCC morR 18 3
-----TGGAAGGAAGGAGGTAGCC morR 19 1
-----TGGAAGGAAGGAGGTAGC- morR 18 1

```

>mmu-mir-691

```

TTTCTTGCTGATTTATTTTTGCTTTCTCCTTGGGTCTGCTTTGAATATTCCTGAAGAGAGGCAGAAAATGTTATATTTAATATCCATA species len reads
--TCTTGCTGATTTATTTTT----- morL 18 2
TTTCTTGCTGATTTATTTTT----- morL 19 1
--TCTTGCTGATTTATTTTTG----- morL 19 1
-----TTGCTTTCTCCTTGGGT----- mirL 18 8
-----GCTTTCTCCTTGGGTCT----- mirL 18 2
-----CTTTCTCCTTGGGTCTGC----- mirL 19 1
-----TTTTTGCTTTCTCCTTGG----- mirL 19 1
-----TTTTTGCTTTCTCCTTGG----- mirL 18 1
-----ATTCCTGAAGAGAGGCAGAAA----- mirR 21 188
-----ATTCCTGAAGAGAGGCAGAAAA----- mirR 22 73
-----ATTCCTGAAGAGAGGCAGAA----- mirR 20 70
-----ATTCCTGAAGAGAGGCAGAAAAT----- mirR 23 27
-----ATTCCTGAAGAGAGGCAGA----- mirR 19 21
-----ATTCCTGAAGAGAGGCAG----- mirR 18 8
-----CCTGAAGAGAGGCAGAAA----- mirR 18 7
-----TCCTGAAGAGAGGCAGAAA----- mirR 19 3
-----TTCTGAAGAGAGGCAGAAAA----- mirR 21 3
-----ATATTCCTGAAGAGAGGC----- mirR 18 2
-----ATTCCTGAAGAGAGGCAGAAAATG----- mirR 24 2
-----TATTCCTGAAGAGAGGCA----- mirR 18 2
-----TTCTGAAGAGAGGCAGAAA----- mirR 20 2
-----TCCTGAAGAGAGGCAGAA----- mirR 18 2
-----AATATTCCTGAAGAGAGG----- mirR 18 1

```

```
-----TTCCTGAAGAGAGGCAGAA----- mirR 19 1
-----CCTGAAGAGAGGCAGAAAAT----- mirR 20 1
-----TTCCTGAAGAGAGGCAGAAAAT----- mirR 22 1
-----CCTGAAGAGAGGCAGAAA----- mirR 19 1
-----AATATTCCTGAAGAGAGGC----- mirR 19 1
-----TCCTGAAGAGAGGCAGAAAAT----- mirR 21 1
-----TATTCCTGAAGAGAGGCAGAAA----- mirR 23 1
-----ATGTTATATTTAATATCCA-- morR 19 1
-----GTTATATTTAATATCCATA morR 19 1
```

>mmu-mir-715

```
TCCGGTTGTGTGGTGGTGGCTGGGGAGAGGGCTCCGTGCACACCCCGCGTGCGCGGTACTTTCCTCCCCTCCTGAGGGCCGCGTGCGGGACGGGGTGTGGGTAGGCAACGGTGGGCTCCCGGGTCCCCACCCGTCTTCC
-----GTGGTGGTGGCTGGGGAGAGGGC-----
-----GTGGTGGCTGGGGAGAGGG-----
-----TGGTGGCTGGGGAGAGGG-----
-----GGTGGTGGCTGGGGAGAGGGC-----
-----GGTGGTGGCTGGGGAGAGGGCT-----
-----TGGTGGCTGGGGAGAGGGCT-----
TCCGGTTGTGTGGTGGTGGCTGGGGAGAG
-----GTGGTGGCTGGGGAGAGG-----
-----CTCCGTGCACACCCCGCGTG-----
-----CTCCGTGCACACCCCGCGT-----
-----CTCCGTGCACACCCCGCGTGC-----
-----CTCCGTGCACACCCCGCG-----
-----CTCCGTGCACACCCCGC-----
-----GGCTCCGTGCACACCCCG-----
-----CGTGCACACCCCGCGTG-----
-----CTCCGTGCACACCCCGCGTGCG-----
-----CCGTGCACACCCCGCGTG-----
-----TCCGTGCACACCCCGCGTG-----
-----CTCCGTGCACACCCCGCGTGCGC-----
-----CGTGCACACCCCGCGTGC-----
-----GGGCTCCGTGCACACCCCG-----
-----GGGCTCCGTGCACACCCCG-----
-----CCGTGCACACCCCGCGT-----
-----GCTCCGTGCACACCCCGCG-----
-----CCGTGCACACCCCGCGTGC-----
-----GCTCCGTGCACACCCCGCGTGC-----
-----GGCTCCGTGCACACCCCGC-----
-----TCCGTGCACACCCCGCGT-----
-----GGGCTCCGTGCACACCCCG-----
-----GCTCCGTGCACACCCCG-----
-----CGTCTTCC
-----CCCGTCTTCC
-----CCCGTCTTCC
-----ACCCGTCTTCC
```



-----CGTCTTCC  
-----CGTCTTCC  
-----CCGTCTTCC  
-----GTCTTCC  
-----CCCGTCTTCC  
-----TCTTCC  
-----GTCTTCC  
-----CCGTCTTCC  
-----CCCGTCTTCC  
-----CTTCC  
-----GTCTTCC  
-----ACCCGTCTTCC  
-----CGTCTTCC  
-----CCGTCTTCC  
-----CCCGTCTTCC  
-----CCCGTCTTCC  
-----CTTCC  
-----CCGTCTTCC  
-----CCGTCTTCC  
-----CTTCC  
-----TCTTCC  
-----ACCCGTCTTCC  
-----CGTCTTCC  
-----TCTTCC  
-----ACCCGTCTTCC  
-----  
-----  
-----  
-----  
-----  
-----

>mmu-mir-297a-1  
GAGCTAAATTTAAAGAATATGTATGTATGTATGTATGTGTGCATGTGCATGTGCATGTATGCATATTGCATGTATATATTATGCATACATGTATGTTTGCTTGTTTGTATGTGTACTACAGCATGCAGGT specie  
GAGCTAAATTTAAAGAAT----- morL 1  
-----TAATGTATGTATGTATGTATG----- mirL 2  
-----TATGTATGTATGTATGTATGTGTG----- mirL 2  
-----ATATGTATGTATGTATGTATG----- mirL 2  
-----ATGTATGTATGTATGTATG----- mirL 1  
-----ATGTATGTATGTATGTATGTGTG----- mirL 2  
-----ATATGTATGTATGTATGTATGTGTG----- mirL 2  
-----ATGTATGTATGTATGTATGTG----- mirL 2  
-----TATGTATGTATGTATGTATGTG----- mirL 2  
-----TATGTATGTATGTATGTATGT----- mirL 2  
-----AATATGTATGTATGTATGTATG----- mirL 2

```
-----TGTATGTATGTATGTATGTGTGC----- mirL 2
-----ATGTATGTATGTATGTATGT----- mirL 2
-----GATGTATGTATGTATGTGTGC----- mirL 2
-----AATATGTATGTATGTATG----- mirL 1
-----TATGTATGTATGTATGTAT----- mirL 1
-----ATATGTATGTATGTATGTATGT----- mirL 2
-----TGTATGTATGTATGTATGT----- mirL 1
-----GAATATGTATGTATGTATGTATG----- mirL 2
-----GATGTATGTATGTATGTGTG----- mirL 2
-----TGTATGTATGTATGTATG----- mirL 1
-----ATATGTATGTATGTATGT----- mirL 1
-----ATGTATGTATGTATGTATGTGTGC----- mirL 2
-----ATATGTATGTATGTATGTATGTG----- mirL 2
-----GATGTATGTATGTATGT----- mirL 1
-----ATATGTATGTATGTATGTATGTGTGCA----- mirL 2
-----TGTATGTATGTATGTATGTGTG----- mirL 2
-----TATGTATGTATGTATGTATGTGTGC----- mirL 2
-----TGTATGTATGTATGTATGTGTGCAT----- mirL 2
-----GATGTATGTATGTATGTGTGCAT----- mirL 2
-----ATATGTATGTATGTATGTATGTGT----- mirL 2
-----ATGTATGTATGTATGTATGTGTGCATG----- mirL 2
-----TATGTATGTATGTATGTATGTGTGCATGTGCA----- mirL 3
-----TGTATGTATGTATGTATGTG----- mirL 2
-----TGTATGTATGTATGTATGTGT----- mirL 2
-----GATGTATGTATGTATGTG----- mirL 1
-----AATATGTATGTATGTATGTATGTGTG----- mirL 2
-----GAATATGTATGTATGTATGTATGTGTG----- mirL 2
-----TATGTGTACTACAGCATGCAG----- mirR 2
-----ATGTGTACTACAGCATGCAG----- mirR 2
-----ATGTGTACTACAGCATGC----- mirR 1
-----TATGTGTACTACAGCATGC----- mirR 1
-----ATGTGTACTACAGCATGCAGG----- mirR 2
-----TTGTATGTGTACTACAGC----- mirR 1
-----ATGTGTACTACAGCATGCAGGT----- mirR 2
```

>mmu-mir-1953

```
TCCCCCAGGTGCTGCCTGGTCTTGGGAAAGTTCTCAGGCTTCTGAGAATTTGCAGGAGCAGAAGGCTGTGAGGTTCCCTCTTCTCCTGGCAGCCCTAAGATCTGGGGAGCCAGCTCTCCATTGTTCTGCCTCCCCCGTGGT
-----CAGGTGCTGCCTGGTCTTG-----
-----CAGGTGCTGCCTGGTCTTGG-----
TCCCCCAGGTGCTGCCTGGTC-----
TCCCCCAGGTGCTGCCTGG-----
-----CCCAGGTGCTGCCTGGTCT-----
-----CCCCAGGTGCTGCCTGGT-----
-----TGGGAAAGTTCTCAGGCTTCTG-----
-----TGGGAAAGTTCTCAGGCTTCT-----
-----TGGGAAAGTTCTCAGGCT-----
```

```

-----TGGGAAAGTTCTCAGGCTTCTGA-----
-----TGGGAAAGTTCTCAGGCTTC-----
-----GGGAAAGTTCTCAGGCTTCTG-----
-----GGGAAAGTTCTCAGGCTTCT-----
-----TGGGAAAGTTCTCAGGCTT-----
-----TGGGAAAGTTCTCAGGCTTCTGAG-----
-----GGAAAGTTCTCAGGCTTCTG-----
-----GGGAAAGTTCTCAGGCTTC-----
-----TTGGGAAAGTTCTCAGGCTTCTG-----
-----GAAAGTTCTCAGGCTTCTG-----
-----TTGGGAAAGTTCTCAGGCTTCT-----
-----TCTTGGGAAAGTTCTCAG-----
-----GGAAAGTTCTCAGGCTTC-----
-----GGGAAAGTTCTCAGGCTTCTGAG-----
-----GAAAGTTCTCAGGCTTCTGAGA-----
-----GGGAAAGTTCTCAGGCTT-----
-----CTTGGGAAAGTTCTCAGG-----
-----GAGCCAGCTCTTCCATTG-----
-----GAGCCAGCTCTTCCATTGT-----
-----GAGCCAGCTCTTCCATTGTCT-----
-----TTGTTCTGCCTCCCCCGT-----
-----TCTGCCTCCCCCGTGGT-----
-----TGTTCCTGCCTCCCCCGTGG-----

```

>mmu-mir-3105

| Sequence                                                                              | species | len | reads |
|---------------------------------------------------------------------------------------|---------|-----|-------|
| GGAGAGCAAGCCCCTAAGCAGCGTAAGTTACTGAGGAACACTGCTTATGAGCTTGCACTCCATAGCCTCTGCTTCCACTCCTGCC | mirL    | 22  | 82    |
| --AGAGCAAGCCCCTAAGCAGCGT--                                                            | mirL    | 25  | 46    |
| --AGAGCAAGCCCCTAAGCAGCGTAAG--                                                         | mirL    | 20  | 42    |
| --AGAGCAAGCCCCTAAGCAGC-----                                                           | mirL    | 24  | 40    |
| --AGAGCAAGCCCCTAAGCAGCGTAA--                                                          | mirL    | 23  | 23    |
| --AGAGCAAGCCCCTAAGCAGCG-----                                                          | mirL    | 21  | 18    |
| --AGAGCAAGCCCCTAAGCAG-----                                                            | mirL    | 19  | 11    |
| ---AGCAAGCCCCTAAGCAGCGTAA--                                                           | mirL    | 22  | 7     |
| ---AGCAAGCCCCTAAGCAGCGTAAG--                                                          | mirL    | 23  | 5     |
| GGAGAGCAAGCCCCTAAGC-----                                                              | mirL    | 19  | 2     |
| ---GAGCAAGCCCCTAAGCAGCG-----                                                          | mirL    | 20  | 2     |
| ---GAGCAAGCCCCTAAGCAGC-----                                                           | mirL    | 19  | 1     |
| ---AGCAAGCCCCTAAGCAGCG-----                                                           | mirL    | 19  | 1     |
| ---GAGCAAGCCCCTAAGCAGCGTAAG--                                                         | mirL    | 24  | 1     |
| ---GAGCAAGCCCCTAAGCAGCGT-----                                                         | mirL    | 21  | 1     |
| -GAGAGCAAGCCCCTAAGCAGCGT-----                                                         | mirL    | 23  | 1     |
| -GAGAGCAAGCCCCTAAGCA-----                                                             | mirL    | 19  | 1     |
| -----GTAAGTTACTGAGGAACA-----                                                          | loop    | 18  | 1     |
| -----ACTGCTTATGAGCTTGCACTCC-----                                                      | mirR    | 22  | 62    |
| -----ACTGCTTATGAGCTTGCACT-----                                                        | mirR    | 21  | 25    |

```

-----ACTGCTTATGAGCTTGCACTCCA----- mirR 23 7
-----ACTGCTTATGAGCTTGAC----- mirR 19 4
-----ACTGCTTATGAGCTTGCACT----- mirR 20 4
-----CTGCTTATGAGCTTGCACTCC----- mirR 21 3
-----CTGCTTATGAGCTTGCACTCCAT----- mirR 23 3
-----CTGCTTATGAGCTTGCACTCCA----- mirR 22 3
-----CTGCTTATGAGCTTGAC----- mirR 18 2
-----CTGCTTATGAGCTTGCACTC----- mirR 20 1
-----ACTGCTTATGAGCTTGCA----- mirR 18 1
-----ACTGCTTATGAGCTTGCACTCCAT----- mirR 24 1
-----ACACTGCTTATGAGCTTGCACTC----- mirR 23 1
-----GCCTCTGCTTCCACTCCTGCC morR 21 2
-----CCATAGCCTCTGCTTCCAC----- morR 19 1
-----TAGCCTCTGCTTCCACTC----- morR 18 1
-----TCCATAGCCTCTGCTTCC----- morR 18 1
-----TCCATAGCCTCTGCTTCCACTCC----- morR 23 1

```

>mmu-mir-297a-5

| Sequence                                                                         | species | len | reads |
|----------------------------------------------------------------------------------|---------|-----|-------|
| ATATGTATGTGTGCATGTGCATGTGTATATGAGTATACATATACATACGCACATACCCATACAAGCATGCACACAAACCC | mirL    | 22  | 96    |
| --ATGTATGTGTGCATGTGCATGT-----                                                    | mirL    | 21  | 24    |
| --ATGTATGTGTGCATGTGC-----                                                        | mirL    | 18  | 20    |
| --ATGTATGTGTGCATGTGCA-----                                                       | mirL    | 19  | 19    |
| --ATGTATGTGTGCATGTGCAT-----                                                      | mirL    | 20  | 11    |
| --ATGTATGTGTGCATGTGCATGTG-----                                                   | mirL    | 23  | 6     |
| --TGTATGTGTGCATGTGCATGT-----                                                     | mirL    | 21  | 4     |
| ATATGTATGTGTGCATGTG-----                                                         | mirL    | 19  | 2     |
| -TATGTATGTGTGCATGTGCATGT-----                                                    | mirL    | 23  | 2     |
| ---GTATGTGTGCATGTGCATGT-----                                                     | mirL    | 20  | 1     |
| -TATGTATGTGTGCATGTGCAT-----                                                      | mirL    | 21  | 1     |
| ---TGTATGTGTGCATGTGCAT-----                                                      | mirL    | 19  | 1     |
| ---GTATGTGTGCATGTGCATG-----                                                      | mirL    | 19  | 1     |
| -----GTGTATATGAGTATACAT-----                                                     | loop    | 18  | 1     |
| -----ATATACATACGCACATACCCAT-----                                                 | mirR    | 22  | 75    |
| -----ATATACATACGCACATACCCATA-----                                                | mirR    | 23  | 66    |
| -----ATATACATACGCACATACCC-----                                                   | mirR    | 20  | 22    |
| -----ATATACATACGCACATACCCA-----                                                  | mirR    | 21  | 13    |
| -----TATACATACGCACATACCCATA-----                                                 | mirR    | 22  | 9     |
| -----TATACATACGCACATACCCATAC-----                                                | mirR    | 23  | 3     |
| -----ATATACATACGCACATACC-----                                                    | mirR    | 19  | 3     |
| -----ATATACATACGCACATAC-----                                                     | mirR    | 18  | 3     |
| -----ATACATACGCACATACCCATA-----                                                  | mirR    | 21  | 2     |
| -----TATACATACGCACATACCCAT-----                                                  | mirR    | 21  | 1     |
| -----CATATACATACGCACATA-----                                                     | mirR    | 18  | 1     |
| -----ATACATACGCACATACCCA-----                                                    | mirR    | 19  | 1     |
| -----TATACATACGCACATACCC-----                                                    | mirR    | 19  | 1     |

```

-----ATACATACGCACATACCCAT----- mirR 20 1
-----TACATATACATACGCACATAC----- mirR 21 1
-----AAGCATGCACACAAACCC morR 18 2
-----ACAAGCATGCACACAAAC-- morR 18 2
-----TACAAGCATGCACACAAA-- morR 18 1
-----ATACAAGCATGCACACAAACC- morR 21 1
-----CATAACAAGCATGCACACAAA-- morR 20 1
-----ATACAAGCATGCACACAAA---- morR 18 1

```

>mmu-mir-1966

| Sequence                                                                           | species | len | reads |
|------------------------------------------------------------------------------------|---------|-----|-------|
| GAAGGGAGCTGGCTCAGGAGAGAGTCTGAGATTTAGGCTCTTTCTGACTCAACTCTCCCTTAGCAAGTCAAGTCCATTGAAC | mirL 25 | 194 |       |
| -AAGGGAGCTGGCTCAGGAGAGAGTC-----                                                    | mirL 24 | 56  |       |
| -AAGGGAGCTGGCTCAGGAGAGAGT-----                                                     | mirL 26 | 48  |       |
| -AAGGGAGCTGGCTCAGGAGAGAG-----                                                      | mirL 23 | 16  |       |
| -AAGGGAGCTGGCTCAGGAGAG-----                                                        | mirL 21 | 12  |       |
| -AAGGGAGCTGGCTCAGGAGAG-----                                                        | mirL 22 | 11  |       |
| -AAGGGAGCTGGCTCAGGAGAG-----                                                        | mirL 20 | 9   |       |
| ---GGAGCTGGCTCAGGAGAGAGTC-----                                                     | mirL 22 | 6   |       |
| ---GGGAGCTGGCTCAGGAGAGAGT-----                                                     | mirL 22 | 4   |       |
| --AGGGAGCTGGCTCAGGAGAGAGTC-----                                                    | mirL 24 | 4   |       |
| ---GGAGCTGGCTCAGGAGAGAG-----                                                       | mirL 20 | 2   |       |
| GAAGGGAGCTGGCTCAGGAGAGAGTCC-----                                                   | mirL 27 | 1   |       |
| --AGGGAGCTGGCTCAGGAGAGAG-----                                                      | mirL 21 | 1   |       |
| --AGGGAGCTGGCTCAGGAGAG-----                                                        | mirL 20 | 1   |       |
| GAAGGGAGCTGGCTCAGGAGAGAGTCC-----                                                   | mirL 26 | 1   |       |
| ---GGGAGCTGGCTCAGGAGAGAGTCC-----                                                   | mirL 24 | 1   |       |
| --AGGGAGCTGGCTCAGGAGAGAGTCC-----                                                   | mirL 25 | 1   |       |
| --AGGGAGCTGGCTCAGGAGAGAGTCC-----                                                   | mirL 26 | 1   |       |
| -----TTTCTGACTCAACTCTCCCTTA-----                                                   | mirR 22 | 4   |       |
| -----TTTCTGACTCAACTCTCCCTTAG-----                                                  | mirR 23 | 2   |       |
| -----TTCTGACTCAACTCTCCCTTAG-----                                                   | mirR 22 | 2   |       |
| -----TTCTGACTCAACTCTCCC-----                                                       | mirR 18 | 2   |       |
| -----TTTCTGACTCAACTCTCCCT-----                                                     | mirR 20 | 1   |       |
| -----CTGACTCAACTCTCCCTT-----                                                       | mirR 18 | 1   |       |
| -----GCAAGTCAAGTCCATTGAA-----                                                      | morR 19 | 1   |       |
| -----AAGTCAAGTCCATTGAAC-----                                                       | morR 18 | 1   |       |

>mmu-mir-3069

| Sequence                                                                                              | species | len | reads |
|-------------------------------------------------------------------------------------------------------|---------|-----|-------|
| CCACCAACAGTCAGAGAAGCTTGCGAGTCAAGATATTGTTTAGCAGACGGAGCGGTTTCTGTTGGACACTAAGTACTGCCACAAAACCTCGAGCGACTAAG | morL 18 | 1   |       |
| ---CAACAGTCAGAGAAGCTT-----                                                                            | morL 18 | 1   |       |
| CCACCAACAGTCAGAGAA-----                                                                               | mirL 24 | 6   |       |
| -----TTGGCAGTCAAGATATTGTTAGC-----                                                                     | mirL 21 | 6   |       |
| -----TTGGCAGTCAAGATATTGTT-----                                                                        | mirL 25 | 5   |       |
| -----TTGGCAGTCAAGATATTGTTAGCA-----                                                                    | mirL 22 | 5   |       |
| -----TTGGCAGTCAAGATATTGTTA-----                                                                       |         |     |       |

```

-----TTGGCAGTCAAGATATTGTTTAGCAGA----- mirL 27 4
-----TGGCAGTCAAGATATTGTTTAGCA----- mirL 24 3
-----TTGGCAGTCAAGATATTGTTTAG----- mirL 23 3
-----TGGCAGTCAAGATATTGT----- mirL 18 2
-----TTGGCAGTCAAGATATTGTTTAGCAG----- mirL 26 2
-----AGCTTGGCAGTCAAGATATTGTTT----- mirL 24 1
-----TGGCAGTCAAGATATTGTTTAGCAG----- mirL 25 1
-----TGGCAGTCAAGATATTGTTTAGC----- mirL 23 1
-----TGGCAGTCAAGATATTGTTTAGCAGA----- mirL 26 1
-----TGGCAGTCAAGATATTGTTTAG----- mirL 22 1
-----TGGCAGTCAAGATATTGTT----- mirL 19 1
-----TAGCAGACGGAGCGGTTTC----- loop 19 1
-----AGCAGACGGAGCGGTTTC----- loop 18 1
-----TTGGACACTAAGTACTGCCACA----- mirR 22 137
-----TTGGACACTAAGTACTGCCACAA----- mirR 23 81
-----TTGGACACTAAGTACTGCCAC----- mirR 21 27
-----TGGACACTAAGTACTGCCACAA----- mirR 22 24
-----TTGGACACTAAGTACTGCCCA----- mirR 20 14
-----GTTGGACACTAAGTACTG----- mirR 18 9
-----TGGACACTAAGTACTGCCACA----- mirR 21 8
-----TGGACACTAAGTACTGCCACAAA----- mirR 23 6
-----TTGGACACTAAGTACTGCCACAAA----- mirR 24 5
-----TGGACACTAAGTACTGCCAC----- mirR 20 3
-----TTGGACACTAAGTACTGCC----- mirR 19 3
-----TGGACACTAAGTACTGCCACAAA----- mirR 24 2
-----GACACTAAGTACTGCCAC----- mirR 18 2
-----TGTTGGACACTAAGTACTG----- mirR 19 1
-----TGTTGGACACTAAGTACTGCC----- mirR 21 1
-----TGTTGGACACTAAGTACTGCCA----- mirR 22 1
-----AAACCTCGAGCGACTAAG morR 18 1

```

>mmu-mir-367

```

ACTGTTGCTAACATGCAACTCTGTTGAATAGAAATTGGAATTGCACTTTAGCAATGGTGATGGAC species len reads
ACTGTTGCTAACATGCAACTCT----- mirL 22 13
ACTGTTGCTAACATGCAACTCTG----- mirL 23 7
ACTGTTGCTAACATGCAACT----- mirL 20 4
CTGTTGCTAACATGCAACT----- mirL 19 1
ACTGTTGCTAACATGCAACTC----- mirL 21 1
-----AATTGCACTTTAGCAATGGTG----- mirR 21 254
-----AATTGCACTTTAGCAATGGTGA----- mirR 22 22
-----AATTGCACTTTAGCAATGGT----- mirR 20 16
-----TGCACTTTAGCAATGGTGA----- mirR 19 11
-----TGCACTTTAGCAATGGTG----- mirR 18 9
-----AATTGCACTTTAGCAATGG----- mirR 19 6
-----AATTGCACTTTAGCAATG----- mirR 18 6
-----ATTGCACTTTAGCAATGGT----- mirR 19 5

```

```
-----ATTGCACTTTAGCAATGGTGA----- mirR 21 4
-----AATTGCACTTTAGCAATGGTGATGGAC mirR 27 4
-----ATTGCACTTTAGCAATGGTG----- mirR 20 3
-----AATTGCACTTTAGCAATGGTGATG--- mirR 24 1
-----ATTGCACTTTAGCAATGGTGATGGAC mirR 26 1
-----TTGCACTTTAGCAATGGTG----- mirR 19 1
-----TTGCACTTTAGCAATGGT----- mirR 18 1
```

>mmu-mir-1187

```
AACTGTTTCCTTATAGACACAATTTATTTTTACACACACACACACACATATATATATATATATGTGTGTGTGTATGTGTGTAATAACAATGTAAAAAT species len reads
AACTGTTTCCTTATAGACA----- morL 20 1
---TGTTTCCTTATAGACAC----- morL 18 1
-----CAATTTATTTTTACACAC----- mirL 18 208
-----ACAATTTATTTTTACACAC----- mirL 19 71
-----ACAATTTATTTTTACACAC----- mirL 18 14
-----AATTTATTTTTACACACA----- mirL 18 1
-----ACAATTTATTTTTACACACA----- mirL 20 1
-----ACACAATTTATTTTTACAC----- mirL 19 1
-----ATTTATTTTTACACACACAC----- mirL 22 1
-----ACACACACACATATATATAT----- loop 20 1
-----CACACACACACATATATATAT----- loop 21 1
-----TATGTGTGTGTGTATGTGTGTAA----- mirR 23 10
-----ATATGTGTGTGTGTATGTGTG----- mirR 21 9
-----TATGTGTGTGTGTATGTGTGTA----- mirR 22 5
-----ATGTGTGTGTGTATGTGTGT----- mirR 20 4
-----ATATATGTGTGTGTGTATGT----- mirR 20 3
-----TATGTGTGTGTGTATGTGT----- mirR 19 3
-----TATGTGTGTGTGTATGTGTG----- mirR 20 2
-----ATATGTGTGTGTGTATGTGTGTA----- mirR 23 2
-----ATGTGTGTGTGTATGTGT----- mirR 18 2
-----TATGTGTGTGTGTATGTGTGT----- mirR 21 2
-----ATATGTGTGTGTGTATGTGT----- mirR 20 2
-----ATGTGTGTGTGTATGTGTGTAA----- mirR 22 2
-----TATGTGTGTGTGTATGTG----- mirR 18 2
-----ATATATGTGTGTGTGTATGTG----- mirR 21 1
-----ATATATGTGTGTGTGTATG----- mirR 19 1
-----ATATGTGTGTGTGTATGT----- mirR 18 1
-----ATATGTGTGTGTGTATGTGT----- mirR 22 1
-----TATATGTGTGTGTGTATG----- mirR 18 1
-----ATGTGTGTGTGTATGTGTG----- mirR 19 1
-----TATGTGTGTGTGTATGTGTAAA----- mirR 24 1
-----ATATATGTGTGTGTGTATGTGT----- mirR 22 1
-----GTGTGTGTGTATGTGTGTAA----- mirR 20 1
-----ATATGTGTGTGTGTATGTG----- mirR 19 1
-----ATATATGTGTGTGTGTATGTGT----- mirR 24 1
-----TATATGTGTGTGTGTATGTGTG----- mirR 22 1
```

```

-----TATATGTGTGTGTATGTG----- mirR 20 1
-----AAATAACAATGTTAAAT morR 18 1

>mmu-mir-599
ACTCACCACAAAGATGTGCTGTCCACAGTGTATTTGATAAGATGACATAGGAGAGGAACCTCTTTACCTTTGTGTCAAGTTTATCAAACCCATACCTGGATGACAAG species len reads
ACTCACCACAAAGATGTG----- morL 18 2
---CACCACAAAGATGTGCTG----- morL 18 1
-----CTGTCCACAGTGTATTTG----- mirL 18 1
-----GCTGTCCACAGTGTATTTGAT----- mirL 21 1
-----TCCACAGTGTATTTGATAA----- mirL 19 1
-----TTTGTGTCAAGTTTATCAAAC----- mirR 19 119
-----TTTGTGTCAAGTTTATCAA----- mirR 18 99
-----TTTGTGTCAAGTTTATCAA----- mirR 18 73
-----TTTGTGTCAAGTTTATCAAAC----- mirR 20 22
-----TTTGTGTCAAGTTTATCAAAC----- mirR 19 12
-----TTTGTGTCAAGTTTATCAAAC----- mirR 21 11
-----TTTGTGTCAAGTTTATCAAAC----- mirR 20 4
-----GTGTCAAGTTTATCAAAC----- mirR 18 3
-----TGTGTCAAGTTTATCAAAC----- mirR 18 2
-----TTTGTGTCAAGTTTATCAAAC----- mirR 22 1
-----TTTGTGTCAAGTTTATCAAACCCATAC----- mirR 25 1
-----CTTTGTGTCAAGTTTATCAA----- mirR 20 1
-----CTTTGTGTCAAGTTTATCAA----- mirR 19 1
-----CCTTTGTGTCAAGTTTATC----- mirR 18 1
-----AACCCATACCTGGATGACA----- morR 19 4
-----AACCCATACCTGGATGAC----- morR 18 2
-----CCATACCTGGATGACAAG morR 18 1

>mmu-mir-344f
TCCCTGAAGAGAGGGGTTTTGCCAGTCAGTCTCCTGGCTGGAGTCCAGCTCTAAGCTGGTTCCAGGCTCTAGCCAGGACCTGACTACAACCTACTTAGCAGTGAAGG species len reads
---CTGAAGAGAGGGGTTTTG----- morL 18 3
---CCTGAAGAGAGGGGTTTTG----- morL 19 2
---CTGAAGAGAGGGGTTTTGC----- morL 19 1
---TGAAGAGAGGGGTTTTGCC----- morL 19 1
---CCCTGAAGAGAGGGGTTTT----- morL 19 1
TCCCTGAAGAGAGGGGTTTT----- morL 20 1
-----AGTCAGTCTCCTGGCTGGAGTCC----- mirL 23 57
-----AGTCAGTCTCCTGGCTGGAGTCC----- mirL 22 14
-----AGTCAGTCTCCTGGCTGGAGTCC----- mirL 24 11
-----AGTCAGTCTCCTGGCTGGAGT----- mirL 21 5
-----AGTCAGTCTCCTGGCTGGAGTCCAG----- mirL 25 4
-----AGTCAGTCTCCTGGCTGGAG----- mirL 20 2
-----TCAGTCTCCTGGCTGGAGT----- mirL 19 1
-----CCAGTCAGTCTCCTGGCTGGAG----- mirL 22 1
-----CCAGTCAGTCTCCTGGCTGGA----- mirL 21 1
-----GCCAGTCAGTCTCCTGGC----- mirL 18 1

```



```

-----CTCTAGCCAGGACCTGACTAC----- mirR 21 120
-----CTCTAGCCAGGACCTGACTACA----- mirR 22 66
-----CTCTAGCCAGGACCTGACTACAA----- mirR 23 15
-----CTCTAGCCAGGACCTGACT----- mirR 19 14
-----CTCTAGCCAGGACCTGACTA----- mirR 20 12
-----GCTCTAGCCAGGACCTGACTAC----- mirR 22 6
-----TCTAGCCAGGACCTGACTAC----- mirR 20 5
-----CTCTAGCCAGGACCTGACTAC----- mirR 18 5
-----CTCTAGCCAGGACCTGACTACAAC----- mirR 24 4
-----CTAGCCAGGACCTGACTAC----- mirR 19 3
-----TCTAGCCAGGACCTGACTACAA----- mirR 22 1
-----AGGCTCTAGCCAGGACCT----- mirR 18 1
-----CTAGCCAGGACCTGACTA----- mirR 18 1
-----TCTAGCCAGGACCTGACTACAAC----- mirR 23 1
-----AACCTACTTAGCAGTGAA----- morR 18 1
-----CCTACTTAGCAGTGAAG----- morR 18 1

>mmu-mir-208b
AGGCACCCACCTCCTGCTCCTCTCAGGGAAGCTTTTTGCTCGCGTTATGTTTCTCATCCGAATATAAGACGAACAAAAGGTTTGTCTGAGGGCTGAGTGCTCCCA species len reads
-----CCCACCTCCTGCTCCTCT----- morL 18 1
-----CCCCACCTCCTGCTCCT----- morL 18 1
-----CCCACCTCCTGCTCCTC----- morL 18 1
-----ACCCACCTCCTGCTCCTC----- morL 20 1
AGGCACCCACCTCCTGCTC----- morL 19 1
-----TCTCAGGGAAGCTTTTTG----- mirL 18 4
-----CTCTCAGGGAAGCTTTTT----- mirL 18 3
-----CCTCTCAGGGAAGCTTTTT----- mirL 19 2
-----CCTCTCAGGGAAGCTTTTT----- mirL 18 2
-----TCAGGGAAGCTTTTTGCT----- mirL 18 1
-----TCCTCTCAGGGAAGCTTT----- mirL 18 1
-----TCCTCTCAGGGAAGCTTTTT----- mirL 19 1
-----TCTCAGGGAAGCTTTTTGTC----- mirL 19 1
-----ATAAGACGAACAAAAGGTTT----- mirR 20 114
-----AGACGAACAAAAGGTTTG----- mirR 18 60
-----ATAAGACGAACAAAAGGTTTG----- mirR 21 53
-----ATAAGACGAACAAAAGGTT----- mirR 19 47
-----AGACGAACAAAAGGTTTGT----- mirR 19 13
-----AAGACGAACAAAAGGTTTG----- mirR 19 12
-----ATAAGACGAACAAAAGGT----- mirR 18 12
-----ATAAGACGAACAAAAGGTTTGT----- mirR 22 4
-----AAGACGAACAAAAGGTTT----- mirR 18 3
-----AAGACGAACAAAAGGTTTGT----- mirR 20 3
-----TAAGACGAACAAAAGGTTT----- mirR 19 2
-----TAAGACGAACAAAAGGTT----- mirR 18 2
-----AATATAAGACGAACAAA----- mirR 18 1
-----ATAAGACGAACAAAAGGTTTGT----- mirR 23 1

```

C:\Documents and Settings\hong\Desktop\Hippocampus-total RNA.txt

```
-----AGACGAACAAAAGGTTTGTC----- mirR 20 1
-----TATAAGACGAACAAAAGGTTT----- mirR 21 1
-----TGAGGGCTGAGTGCTCCCA morR 19 1
-----CTGAGGGCTGAGTGCTCC-- morR 18 1
-----TTTGTCTGAGGGCTGAGTGCTC-- morR 22 1
-----TGAGGGCTGAGTGCTCCC- morR 18 1
```

>mmu-mir-3470b

| Species | len | reads |
|---------|-----|-------|
| morL    | 23  | 5     |
| morL    | 24  | 3     |
| morL    | 18  | 3     |
| morL    | 18  | 3     |
| morL    | 22  | 2     |
| morL    | 18  | 1     |
| morL    | 21  | 1     |
| morL    | 20  | 1     |
| morL    | 23  | 1     |
| morL    | 21  | 1     |
| morL    | 24  | 1     |
| morL    | 26  | 1     |
| morL    | 22  | 1     |
| morL    | 18  | 1     |
| mirL    | 18  | 20    |
| mirL    | 21  | 12    |
| mirL    | 20  | 9     |
| mirL    | 22  | 8     |
| mirL    | 26  | 7     |
| mirL    | 19  | 7     |
| mirL    | 19  | 7     |
| mirL    | 23  | 6     |
| mirL    | 18  | 4     |
| mirL    | 25  | 4     |
| mirL    | 18  | 3     |
| mirL    | 18  | 3     |
| mirL    | 20  | 3     |
| mirL    | 19  | 3     |
| mirL    | 22  | 3     |
| mirL    | 24  | 2     |
| mirL    | 19  | 2     |
| mirL    | 20  | 2     |
| mirL    | 19  | 2     |
| mirL    | 19  | 2     |
| mirL    | 24  | 2     |
| mirL    | 21  | 2     |
| mirL    | 23  | 2     |

```

-----ACTCTGTAGACCAGGCTGGCC----- mirL 21 2
-----ACTCACTCTGTAGACCAGGCTGGC----- mirL 24 1
-----ACTCTGTAGACCAGGCTGGCCT----- mirL 22 1
-----ACTCTGTAGACCAGGCTG----- mirL 18 1
-----CTCACTCTGTAGACCAGGCTGGCCT----- mirL 25 1
-----CTCTGTAGACCAGGCTGG----- mirL 18 1
-----TCTGTAGACCAGGCTGGC----- mirL 18 1
-----CACTCTGTAGACCAGGCTGGCCTTGAAC----- mirL 28 1
-----CTCTGTAGACCAGGCTGGCC----- mirL 20 1
-----TGGCCTTGAACTCAAAAA----- loop 18 3
-----GCCTTGAACTCAAAAAATT----- loop 18 1
-----CTTGAACTCAAAAAATTCACC----- loop 20 1
-----TGGCCTTGAACTCAAAAAATTCACC----- loop 24 1
-----CTGGCCTTGAACTCAAAAA----- loop 19 1
-----CTGGCCTTGAACTCAAAAAATT----- loop 21 1
-----TGGCCTTGAACTCAAAAAAT----- loop 19 1
-----GGCCTTGAACTCAAAAAATT----- loop 19 1
-----CTGGCCTTGAACTCAAAAAATTC----- loop 22 1
-----ACCTGCCTCTGCCTCCCGAG----- mirR 20 31
-----ACCTGCCTCTGCCTCCCG----- mirR 18 19
-----CACCTGCCTCTGCCTCCC----- mirR 18 15
-----ACCTGCCTCTGCCTCCCGA----- mirR 19 14
-----CACCTGCCTCTGCCTCCCG----- mirR 19 12
-----CACCTGCCTCTGCCTCCCGAG----- mirR 21 10
-----ACCTGCCTCTGCCTCCCGAGT----- mirR 21 10
-----TTCACCTGCCTCTGCCTCCC----- mirR 20 7
-----CCTGCCTCTGCCTCCCGA----- mirR 18 6
-----ACCTGCCTCTGCCTCCCGAGTGTGGGAC----- mirR 29 5
-----CACCTGCCTCTGCCTCCCGA----- mirR 20 4
-----TTCACCTGCCTCTGCCTCC----- mirR 19 4
-----TGCCTCTGCCTCCCGAGT----- mirR 18 3
-----CTGCCTCTGCCTCCCGAG----- mirR 18 3
-----TCACCTGCCTCTGCCTCCC----- mirR 19 3
-----CCTGCCTCTGCCTCCCGAGT----- mirR 20 3
-----TTCACCTGCCTCTGCCTCCCG----- mirR 21 3
-----CCTGCCTCTGCCTCCCGAGTGC----- mirR 22 3
-----TGCCTCTGCCTCCCGAGTG----- mirR 19 2
-----ACCTGCCTCTGCCTCCCGAGTGTGGGA----- mirR 28 2
-----CCTGCCTCTGCCTCCCGAG----- mirR 19 2
-----CTGCCTCTGCCTCCCGAGT----- mirR 19 2
-----TTCACCTGCCTCTGCCTCCCGAG----- mirR 23 2
-----CCTGCCTCTGCCTCCCGAGTG----- mirR 21 1
-----TCACCTGCCTCTGCCTCCCGAG----- mirR 22 1
-----TTCACCTGCCTCTGCCTC----- mirR 18 1
-----TCACCTGCCTCTGCCTCC----- mirR 18 1
-----TCACCTGCCTCTGCCTCCCGAGTGTGGGAC----- mirR 31 1

```

```

-----TCACCTGCCTCTGCCTCCCG----- mirR 20 1
-----ACCTGCCTCTGCCTCCCGAGTGCTG----- mirR 25 1
-----CACCTGCCTCTGCCTCCCGAGT----- mirR 22 1
-----CTGCCTCTGCCTCCCGAGTGCTGGGA----- mirR 26 1
-----TGCCTCTGCCTCCCGAGTGC----- mirR 20 1
-----TGCTCTGCCTCCCGAGTGCTGGGA----- mirR 25 1
-----CTGGGACTAAAGGCATGCCG----- morR 20 2
-----GCTGGGACTAAAGGCATGC----- morR 19 2
-----GCTGGGACTAAAGGCATGCCGTACCA morR 26 2
-----CTGGGACTAAAGGCATGCCGTACCA morR 25 2
-----GCTGGGACTAAAGGCATG----- morR 18 2
-----TGCTGGGACTAAAGGCATGCCG----- morR 22 1
-----TGGGACTAAAGGCATGCCG----- morR 19 1
-----TGGGACTAAAGGCATGCCGTACCA morR 24 1

```

>mmu-mir-1892

```

CTGGATATATTTCTACTCTTGACCAAAGTTTTGTAAGAAACAATACAGAATTTGGGGACGGGAGGGAGGATACTTTGAGAACTACTTACAAA species len reads
CTGGATATATTTCTACTC----- morL 18 1
-----TGACCAAAGTTTTGTAAG----- mirL 18 3
-----ATTTGGGGACGGGAGGGAGGAT----- mirR 22 169
-----ATTTGGGGACGGGAGGGAGGA----- mirR 21 51
-----ATTTGGGGACGGGAGGGAGGATA----- mirR 23 44
-----ATTTGGGGACGGGAGGGAGG----- mirR 20 36
-----ATTTGGGGACGGGAGGGAG----- mirR 19 17
-----ATTTGGGGACGGGAGGGAGGATA----- mirR 24 3
-----AGAATTTGGGGACGGGAG----- mirR 18 3
-----TTTGGGGACGGGAGGGAGGAT----- mirR 21 3
-----TTGGGGACGGGAGGGAGGAT----- mirR 20 3
-----TTGGGGACGGGAGGGAGGA----- mirR 19 2
-----AATTTGGGGACGGGAGGGAGGAT----- mirR 23 2
-----ATTTGGGGACGGGAGGGGA----- mirR 18 2
-----TTGGGGACGGGAGGGAGGATA----- mirR 21 1
-----TTTGGGGACGGGAGGGAGG----- mirR 19 1
-----GAATTTGGGGACGGGAGG----- mirR 18 1
-----TGGGGACGGGAGGGAGGA----- mirR 18 1
-----TTGAGAACTACTTACAAA morR 18 1
-----ATACTTTGAGAACTACTTA----- morR 19 1
-----CTTTGAGAACTACTTACAAA morR 20 1

```

>mmu-mir-1928

```

GGAGAGGGTTTCGAGGATAGAGCTTTGCGCATGTAGGCAAGTGCTCTACCACTGAGCTACATTGCCAGCTCTAACCCCAACTTGTAAGAAG species len reads
GGAGAGGGTTTCGAGGAT----- morL 18 1
-----TAGAGCTTTGCGCATGTGTA----- mirL 19 2
-----CAAGTGCTCTACCACTGA----- loop 18 2
-----GGCAAGTGCTCTACCACT----- loop 18 1
-----CAAGTGCTCTACCACTGAG----- loop 19 1

```

```

-----TAGGCAAGTGCTCTACCAC----- loop 19 1
-----GCAAGTGCTCTACCACTGA----- loop 19 1
-----AGGCAAGTGCTCTACCAC----- loop 18 1
-----GCAAGTGCTCTACCACTG----- loop 18 1
-----AGCTACATTGCCAGCTCT----- mirR 18 274
-----GCTACATTGCCAGCTCTAA----- mirR 19 17
-----GCTACATTGCCAGCTCTA----- mirR 18 11
-----AGCTACATTGCCAGCTCTA----- mirR 19 9
-----GCTACATTGCCAGCTCTAAC----- mirR 20 7
-----GCTACATTGCCAGCTCTAACC----- mirR 21 4
-----GAGCTACATTGCCAGCTC----- mirR 18 3
-----AGCTACATTGCCAGCTCTAA----- mirR 20 3
-----CTACATTGCCAGCTCTAA----- mirR 18 2
-----AGCTACATTGCCAGCTCTAACCCCA----- mirR 25 1
-----CTGAGCTACATTGCCAGCT----- mirR 19 1
-----TGAGCTACATTGCCAGCTCTA----- mirR 21 1
-----TAACCCCAACTTGTAAG----- morR 18 1
-----CCCCAACTTGTAAGAAG morR 18 1

```

>mmu-mir-3093

```

GCTCTGCGAGCTCGGCTCTGCCGACCCCGCGGAGCTCACACTCGACCTTCCAGAGAAGGGTGTGGACACCGTGGGAGGTTGGGGA species len reads
GCTCTGCGAGCTCGGCTC----- morL 18 1
-----CGCACCCCGCGGAGCTCACACT----- mirL 22 33
-----CGCACCCCGCGGAGCTCACAC----- mirL 21 31
-----GCACCCCGCGGAGCTCACACTC----- mirL 22 22
-----GCACCCCGCGGAGCTCACACT----- mirL 21 22
-----CGCACCCCGCGGAGCTCACACTC----- mirL 23 16
-----CGCACCCCGCGGAGCTCACACTCG----- mirL 24 10
-----GCACCCCGCGGAGCTCACACTCG----- mirL 23 7
-----CGCACCCCGCGGAGCTCAC----- mirL 19 5
-----GCACCCCGCGGAGCTCAC----- mirL 18 5
-----CGCACCCCGCGGAGCTCACACTCGA----- mirL 25 3
-----GCACCCCGCGGAGCTCACAC----- mirL 19 3
-----CGCACCCCGCGGAGCTCACAC----- mirL 20 3
-----CACCCCGCGGAGCTCACACT----- mirL 20 2
-----GCACCCCGCGGAGCTCACAC----- mirL 20 2
-----CACCCCGCGGAGCTCACACTC----- mirL 21 2
-----ACCCCGCGGAGCTCACAC----- mirL 18 1
-----CACCCCGCGGAGCTCACACTCGA----- mirL 23 1
-----CACCCCGCGGAGCTCACAC----- mirL 18 1
-----CCTTCCAGAGAAGGGTGT----- loop 18 4
-----ACCTTCCAGAGAAGGGTG----- loop 18 1
-----ACCTTCCAGAGAAGGGTGT----- loop 19 1
-----GACCTTCCAGAGAAGGGT----- loop 18 1
-----TGTTGGACACCGTGGGAGGTTGG----- mirR 22 76
-----TGTTGGACACCGTGGGAGGTTG----- mirR 21 26

```

```

-----TGTGGACACCGTGGGAGGTTGGG-- mirR 23 22
-----TGTGGACACCGTGGGAGGTTGGGGA mirR 25 14
-----TGTGGACACCGTGGGAGG----- mirR 18 11
-----TGTGGACACCGTGGGAGGTTGGGG- mirR 24 9
-----TGTGGACACCGTGGGAGGTT----- mirR 20 6
-----GGACACCGTGGGAGGTTG----- mirR 18 2
-----GTGGACACCGTGGGAGGTTGGG-- mirR 22 1
-----GTGGACACCGTGGGAGGTTGG--- mirR 21 1
-----GTGTGGACACCGTGGGAGGT----- mirR 20 1

>mmu-mir-3076
CATTGGAGTTCTGTCTAACAACAGGGGAAGCTCAGTGCCAGCCTTTCTCTTAGCCGCACTCTGGTCTTCCCTGCAGAT species len reads
CATTGGAGTTCTGTCTAATA----- morL 19 1
-----CACAGGGGAAGCTCAGTGCCAG----- mirL 22 12
-----CACAGGGGAAGCTCAGTGCCAGC----- mirL 23 9
-----ACAGGGGAAGCTCAGTGCCAGC----- mirL 22 9
-----ACAGGGGAAGCTCAGTGCCAG----- mirL 21 8
-----ACAGGGGAAGCTCAGTGCCAGCC----- mirL 23 8
-----ACACAGGGGAAGCTCAGTGCCAG----- mirL 23 7
-----CACAGGGGAAGCTCAGTGCCA----- mirL 21 7
-----ACACAGGGGAAGCTCAGTGCCA----- mirL 22 7
-----ACACAGGGGAAGCTCAGTGCC----- mirL 20 4
-----ACAGGGGAAGCTCAGTGCCA----- mirL 20 4
-----CACAGGGGAAGCTCAGTGCCAGCCTT----- mirL 26 4
-----ACACAGGGGAAGCTCAGTGCC----- mirL 21 3
-----CACAGGGGAAGCTCAGTG----- mirL 18 2
-----CACAGGGGAAGCTCAGTGCCAGCC----- mirL 24 2
-----CACAGGGGAAGCTCAGTGCCAGCCT----- mirL 25 2
-----ACAGGGGAAGCTCAGTGCC----- mirL 19 2
-----TAACACAGGGGAAGCTCAGTGCC----- mirL 22 1
-----ACAGGGGAAGCTCAGTGCC----- mirL 18 1
-----ACACAGGGGAAGCTCAGTGCCAGCCT----- mirL 26 1
-----ACACAGGGGAAGCTCAGT----- mirL 18 1
-----ACAGGGGAAGCTCAGTGCCAGCCT----- mirL 24 1
-----AACACAGGGGAAGCTCAGTGCCAGC----- mirL 25 1
-----CCGCACTCTGGTCTTCCCTTGC----- mirR 22 44
-----CGCACTCTGGTCTTCCCTTGCAG-- mirR 23 42
-----CGCACTCTGGTCTTCCCTTGCAG-- mirR 22 36
-----CGCACTCTGGTCTTCCCTTGCAG-- mirR 21 32
-----CCGCACTCTGGTCTTCCCTTGCAG-- mirR 23 15
-----CACTCTGGTCTTCCCTTGCAG-- mirR 21 14
-----CACTCTGGTCTTCCCTTGCAG-- mirR 22 9
-----CCGCACTCTGGTCTTCCCTTGCAG-- mirR 24 8
-----CGCACTCTGGTCTTCCCTTGCAG-- mirR 24 5
-----CCGCACTCTGGTCTTCCCTTGCAG-- mirR 21 5
-----CGCACTCTGGTCTTCCCTTGCAG-- mirR 18 5

```

```

-----CACTCTGGTCTTCCCTTG----- mirR 18 4
-----CACTCTGGTCTTCCCTTGCAGAT----- mirR 23 4
-----CACTCTGGTCTTCCCTTGC----- mirR 19 4
-----CACTCTGGTCTTCCCTTGC----- mirR 20 4
-----CCGCACCTCTGGTCTTCCCTT----- mirR 20 3
-----CCGCACCTCTGGTCTTCCCT----- mirR 19 2
-----CGCACCTCTGGTCTTCCCTT----- mirR 19 2
-----CGCACCTCTGGTCTTCCCTTGC----- mirR 20 2
-----CCGCACCTCTGGTCTTCCCTTGCAG----- mirR 25 1
-----TAGCCGCACCTCTGGTCTT----- mirR 19 1
-----GCCGCACCTCTGGTCTTCC----- mirR 18 1

```

>mmu-mir-3064

| Sequence                                                                                                     | species | len | reads |
|--------------------------------------------------------------------------------------------------------------|---------|-----|-------|
| TTGTCTAACTTTTTATTTTTGGTCTGGCTGTGTGGTGTGCAAAACTCCGTACATTGCTATTTTGCCACACTGCAACACCTTACAGATGTGGAAGATGTGAAATTTGTC | morL    | 18  | 4     |
| ---TCTAACTTTTTATTTTTG---                                                                                     | morL    | 18  | 2     |
| ---ACTTTTTATTTTTGGTCT---                                                                                     | morL    | 18  | 2     |
| --GTCTAACTTTTTATTTTT---                                                                                      | morL    | 18  | 2     |
| -TGTCTAACTTTTTATTTTT-                                                                                        | morL    | 18  | 1     |
| TTGTCTAACTTTTTATTTTT                                                                                         | morL    | 20  | 1     |
| TTGTCTAACTTTTTATTTTT                                                                                         | morL    | 19  | 1     |
| -TGTCTAACTTTTTATTTTT-                                                                                        | morL    | 19  | 1     |
| -----TCTGGCTGTTGTGGTGTGCAA-----                                                                              | mirL    | 21  | 9     |
| -----TCTGGCTGTTGTGGTGTGC-----                                                                                | mirL    | 19  | 6     |
| -----TCTGGCTGTTGTGGTGTGCAAA-----                                                                             | mirL    | 22  | 4     |
| -----TGGCTGTTGTGGTGTGCAAAACTCCGT-----                                                                        | mirL    | 27  | 3     |
| -----TGGCTGTTGTGGTGTGCAAAAC-----                                                                             | mirL    | 22  | 2     |
| -----TGGCTGTTGTGGTGTGCAAAA-----                                                                              | mirL    | 21  | 2     |
| -----TGGCTGTTGTGGTGTGCAAAACTCCGTA-----                                                                       | mirL    | 28  | 1     |
| -----TGGCTGTTGTGGTGTGCAAAACT-----                                                                            | mirL    | 23  | 1     |
| -----TGGCTGTTGTGGTGTGCAAAACTC-----                                                                           | mirL    | 24  | 1     |
| -----TGGTCTGGCTGTTGTGGT-----                                                                                 | mirL    | 18  | 1     |
| -----GGCTGTTGTGGTGTGCAAA-----                                                                                | mirL    | 19  | 1     |
| -----CTGGCTGTTGTGGTGTGCAA-----                                                                               | mirL    | 20  | 1     |
| -----TCCGTACATTGCTATTTTGCC-----                                                                              | loop    | 21  | 1     |
| -----ACTGCAACACCTTACAGATG-----                                                                               | mirR    | 20  | 84    |
| -----ACTGCAACACCTTACAGAT-----                                                                                | mirR    | 19  | 65    |
| -----ACTGCAACACCTTACAGATGT-----                                                                              | mirR    | 21  | 62    |
| -----ACTGCAACACCTTACAGATGTG-----                                                                             | mirR    | 22  | 32    |
| -----ACTGCAACACCTTACAGA-----                                                                                 | mirR    | 18  | 30    |
| -----TGCAACACCTTACAGATG-----                                                                                 | mirR    | 18  | 3     |
| -----CTGCAACACCTTACAGATG-----                                                                                | mirR    | 19  | 2     |
| -----CTGCAACACCTTACAGAT-----                                                                                 | mirR    | 18  | 1     |
| -----CTGCAACACCTTACAGATGTG-----                                                                              | mirR    | 21  | 1     |
| -----TGCAACACCTTACAGATGT-----                                                                                | mirR    | 19  | 1     |
| -----CTGCAACACCTTACAGATGTGG-----                                                                             | mirR    | 22  | 1     |
| -----CTGCAACACCTTACAGATGT-----                                                                               | mirR    | 20  | 1     |

```

-----GGAAGATGTGAAATTTGTC morR 19 3
-----GAAGATGTGAAATTTGTC morR 18 3
-----ATGTGGAAGATGTGAAAT----- morR 18 1

>mmu-mir-3097
TTAGGAATGTTTGAGTGACACAGGTGGGAAGTGTGTGTCCAGTGGGTGTGTCTACAGATCTGCTCAGACCTTCTACCTGTGTCAGCTCTCTTACAGGGCCCGGAGAT species len reads
---GGAATGTTTGAGTGACAC----- morL 18 1
TTAGGAATGTTTGAGTGAC----- morL 19 1
-----CACAGGTGGGAAGTGTGTGTCC----- mirL 22 22
-----CACAGGTGGGAAGTGTGTGTCCAG----- mirL 24 14
-----ACACAGGTGGGAAGTGTGTGTCC----- mirL 23 9
-----ACACAGGTGGGAAGTGTGTGT----- mirL 21 7
-----CACAGGTGGGAAGTGTGTGTCCA----- mirL 23 7
-----CACAGGTGGGAAGTGTGTGT----- mirL 20 5
-----ACACAGGTGGGAAGTGTGTGTCCAG----- mirL 25 4
-----ACACAGGTGGGAAGTGTGTGTCT----- mirL 22 3
-----CACAGGTGGGAAGTGTGTGTCCAGT----- mirL 25 3
-----ACACAGGTGGGAAGTGTGTGTCCA----- mirL 24 3
-----ACACAGGTGGGAAGTGTGTGT----- mirL 20 2
-----CACAGGTGGGAAGTGTGTGTCT----- mirL 21 2
-----GACACAGGTGGGAAGTGTGTGT----- mirL 22 2
-----CACAGGTGGGAAGTGTGTGT----- mirL 19 2
-----ACAGGTGGGAAGTGTGTGT----- mirL 18 1
-----AGGTGGGAAGTGTGTGTCT----- mirL 18 1
-----GACACAGGTGGGAAGTGT----- mirL 18 1
-----CAGGTGGGAAGTGTGTGT----- mirL 18 1
-----ACACAGGTGGGAAGTGTGTGTCCAGT----- mirL 26 1
-----ACAGGTGGGAAGTGTGTGTCCAGT----- mirL 24 1
-----ACAGGTGGGAAGTGTGTGTCT----- mirL 21 1
-----GACACAGGTGGGAAGTGTGTGTCT----- mirL 24 1
-----ACAGGTGGGAAGTGTGTGTCCAGTG----- mirL 25 1
-----ACAGGTGGGAAGTGTGTGT----- mirL 19 1
-----CAGTGGGTGTGTCTACAGAT----- loop 20 3
-----CTCAGACCTTCTACCTGTCA----- mirR 21 65
-----CTCAGACCTTCTACCTGTCTAG----- mirR 22 54
-----CTCAGACCTTCTACCTGTCTAGC----- mirR 23 49
-----CTCAGACCTTCTACCTGTCT----- mirR 20 18
-----TCAGACCTTCTACCTGTCTAGC----- mirR 22 9
-----CTCAGACCTTCTACCTGTCT----- mirR 19 8
-----CTCAGACCTTCTACCTGTCTAGCT----- mirR 24 6
-----TCAGACCTTCTACCTGTCTAG----- mirR 21 2
-----AGACCTTCTACCTGTCTA----- mirR 18 2
-----TGCTCAGACCTTCTACCTGT----- mirR 20 1
-----TCAGACCTTCTACCTGTCTA----- mirR 20 1
-----GCTCAGACCTTCTACCTGTCT----- mirR 21 1
-----CTCAGACCTTCTACCTGTCTAGCT----- mirR 25 1

```



C:\Documents and Settings\hong\Desktop\Hippocampus-total RNA.txt

```
-----TCAGACCTTTCTACCTGTC----- mirR 19 1
-----TCAGACCTTTCTACCTGTCAGCTCT----- mirR 25 1
-----CAGCTCTTTACAGGGCC----- morR 18 4
-----AGCTCTTTACAGGGCCCG----- morR 19 2
-----AGCTCTTTACAGGGCC----- morR 18 2
-----CAGCTCTTTACAGGGCCCG----- morR 20 1
-----TCTCTTACAGGGCCCGGAGAT morR 22 1
-----TCAGCTCTTTACAGGGC----- morR 18 1
-----CAGCTCTTTACAGGGCC----- morR 19 1
```

>mmu-mir-669d-2

```
ATATATGTGCATGTGTGTATACTTGTGTGTCATGTATATGTGTCTATATGAATATACATATACATACACACCCATATACACACGCATGCACGGAAAC species len reads
--ATATGTGCATGTGTGTATACT----- morL 20 19
--ATATGTGCATGTGTGTATACT----- morL 21 8
---ATGTGCATGTGTGTATACT----- morL 18 8
--ATATGTGCATGTGTGTATA----- morL 19 2
--ATATGTGCATGTGTGTAT----- morL 18 1
ATATATGTGCATGTGTGTATA----- morL 21 1
-----ACTTGTGTGTGCATGTATATGT----- mirL 22 83
-----ACTTGTGTGTGCATGTATAT----- mirL 20 67
-----ACTTGTGTGTGCATGTATATG----- mirL 21 46
-----ACTTGTGTGTGCATGTAT----- mirL 18 24
-----ACTTGTGTGTGCATGTATA----- mirL 19 22
-----ACTTGTGTGTGCATGTATATGT----- mirL 23 6
-----CTTGTGTGTGCATGTATATGT----- mirL 21 5
-----CTTGTGTGTGCATGTATATGTGTC----- mirL 24 2
-----ACTTGTGTGTGCATGTATATGTGTC----- mirL 25 2
-----CTTGTGTGTGCATGTATAT----- mirL 19 1
-----TACTTGTGTGTGCATGTATAT----- mirL 21 1
-----CTTGTGTGTGCATGTATATG----- mirL 20 1
-----CTTGTGTGTGCATGTATATGTG----- mirL 22 1
-----CTTGTGTGTGCATGTATATGTGT----- mirL 23 1
-----TACTTGTGTGTGCATGTATATGT----- mirL 23 1
-----TGCTATATGAATATACA----- loop 18 1
-----ATATACATACACCCATATAC----- mirR 22 14
-----TATACATACACCCATATAC----- mirR 21 6
-----ATACATACACCCATATAC----- mirR 20 1
-----ATATACATACACCCATATACA----- mirR 23 1
-----TACATACACCCATATACACA----- mirR 22 1
-----ACACACGCATGCACGGAA-- morR 18 1
-----ACACGCATGCACGGAAAC morR 18 1
```

>mmu-mir-669n

```
ATTTGTGTGTGGATGTGTGTAAATGTATGTGCATCCACAGCACATGTGCAGAGGGCATTGGCTTACTCCTTCTACCACGTGGAGCCTGAAGACTG species len reads
ATTTGTGTGTGGATGTGTGT----- mirL 20 207
ATTTGTGTGTGGATGTGTG----- mirL 19 50
```

```

ATTTGTGTGTGGATGTGTGTG----- mirL 21 34
ATTTGTGTGTGGATGTGT----- mirL 18 20
ATTTGTGTGTGGATGTGTGT----- mirL 22 8
ATTTGTGTGTGGATGTGTGTGA----- mirL 23 2
-TTTGTGTGTGGATGTGTGT----- mirL 19 1
ATTTGTGTGTGGATGTGTGTGAAA----- mirL 25 1
-----CTTACTCCTTCTACCACG----- mirR 18 2
-----CGTGGAGCCTGAAGACTG morR 18 1

```

>mmu-mir-3087

```

CCGTGGGCTGGGGCTGTAGCACAGGGCAGGGCAAGAGTTGAGACTTATGGCTCCTAACTCACTGTCATGTCCTCAGATTACGGCTGTCACCTGA species len reads
CCGTGGGCTGGGGCTGTGA----- morL 18 1
-----CACAGGGCAGGGCAAGAGTTGA----- mirL 22 13
-----CACAGGGCAGGGCAAGAGTTG----- mirL 21 8
-----CAGGGCAGGGCAAGAGTTGAG----- mirL 21 8
-----CAGGGCAGGGCAAGAGTTGAGAC----- mirL 23 8
-----CAGGGCAGGGCAAGAGTTGA----- mirL 20 7
-----ACAGGGCAGGGCAAGAGTTGA----- mirL 21 6
-----CAGGGCAGGGCAAGAGTTGAGA----- mirL 22 5
-----ACAGGGCAGGGCAAGAGTTG----- mirL 20 4
-----ACAGGGCAGGGCAAGAGTTGAG----- mirL 22 4
-----ACAGGGCAGGGCAAGAGTTGAGAC----- mirL 24 4
-----ACAGGGCAGGGCAAGAGTT----- mirL 19 3
-----CACAGGGCAGGGCAAGAGTTGAG----- mirL 23 2
-----CACAGGGCAGGGCAAGAGTTGAGA----- mirL 24 2
-----CACAGGGCAGGGCAAGAGTT----- mirL 20 2
-----CAGGGCAGGGCAAGAGTTG----- mirL 19 2
-----GCACAGGGCAGGGCAAGAGTTG----- mirL 22 1
-----AGGGCAGGGCAAGAGTTG----- mirL 18 1
-----CAGGGCAGGGCAAGAGTT----- mirL 18 1
-----GCACAGGGCAGGGCAAGAGTT----- mirL 21 1
-----AGGGCAGGGCAAGAGTTGA----- mirL 19 1
-----TAACTCACTGTCATGTCCTC----- mirR 20 38
-----TAACTCACTGTCATGTCCTCA----- mirR 21 38
-----CTAACTCACTGTCATGTCCTCA----- mirR 22 31
-----TAACTCACTGTCATGTCCTCAG----- mirR 22 25
-----CTAACTCACTGTCATGTCCTCAG----- mirR 23 17
-----CTAACTCACTGTCATGTCCTC----- mirR 21 12
-----AACTCACTGTCATGTCCTC----- mirR 19 10
-----CTCACTGTCATGTCCTCAG----- mirR 19 10
-----CTAACTCACTGTCATGTCCT----- mirR 20 10
-----AACTCACTGTCATGTCCT----- mirR 18 8
-----TAACTCACTGTCATGTCCTCAGA----- mirR 23 5
-----TAACTCACTGTCATGTCCT----- mirR 19 5
-----CTCACTGTCATGTCCTCA----- mirR 18 4
-----AACTCACTGTCATGTCCTCA----- mirR 20 3

```

```

-----ACTCACTGTCATGTCCTCA----- mirR 19 3
-----ACTCACTGTCATGTCCTCAG----- mirR 20 3
-----CTAACTCACTGTCATGTC----- mirR 18 2
-----CTCACTGTCATGTCCTCAGATT----- mirR 22 2
-----TCCTAACTCACTGTCATG----- mirR 18 2
-----CTCACTGTCATGTCCTCAGA----- mirR 20 2
-----AACTCACTGTCATGTCCTCAG----- mirR 21 2
-----CTAACTCACTGTCATGTCC----- mirR 19 1
-----TAACTCACTGTCATGTCCTCAGAT----- mirR 24 1
-----CCTAACTCACTGTCATGTC----- mirR 19 1
-----AACTCACTGTCATGTCCTCAGAT----- mirR 23 1
-----TAACTCACTGTCATGTCC----- mirR 18 1
-----TCCTAACTCACTGTCATGT----- mirR 19 1
-----ACTCACTGTCATGTCCTC----- mirR 18 1
-----AGATTACGGCTGTCCACCTGA morR 20 1
-----TCAGATTACGGCTGTCCAC----- morR 18 1

```

>mmu-mir-680-3

| Species | len | reads |
|---------|-----|-------|
| morL    | 18  | 12    |
| morL    | 18  | 3     |
| morL    | 19  | 1     |
| morL    | 18  | 1     |
| morL    | 22  | 1     |
| morL    | 18  | 1     |
| morL    | 18  | 1     |
| morL    | 19  | 1     |
| morL    | 19  | 1     |
| mirL    | 18  | 249   |
| mirL    | 18  | 13    |
| mirL    | 19  | 11    |
| mirL    | 20  | 2     |
| mirL    | 19  | 1     |
| mirL    | 19  | 1     |
| mirL    | 18  | 1     |
| mirR    | 18  | 6     |
| mirR    | 18  | 1     |
| morR    | 19  | 4     |
| morR    | 20  | 3     |
| morR    | 27  | 2     |
| morR    | 18  | 1     |
| morR    | 26  | 1     |
| morR    | 24  | 1     |
| morR    | 28  | 1     |

>mmu-mir-705

|                                                                                                                   | species | len | reads |
|-------------------------------------------------------------------------------------------------------------------|---------|-----|-------|
| CCCACTCCATGTCCCAGTAGTGGTGGGAGGTGGGGTGGGCACAGAGGGAATGACTTCTTTCTCCTGCAGTCCTCCCTACCTCCCTAACATGAAACCCTCCAGGTTGGGGTTTG | morL    | 18  | 6     |
| CCCACTCCATGTCCCAGT-----                                                                                           | morL    | 19  | 1     |
| ---ACTCCATGTCCCAGTAGTG-----                                                                                       | morL    | 20  | 1     |
| ---ACTCCATGTCCCAGTAGTGG-----                                                                                      | mirL    | 20  | 110   |
| -----GGTGGGAGGTGGGGTGGGCA-----                                                                                    | mirL    | 21  | 81    |
| -----GGTGGGAGGTGGGGTGGGCAC-----                                                                                   | mirL    | 19  | 29    |
| -----GGTGGGAGGTGGGGTGGGC-----                                                                                     | mirL    | 18  | 10    |
| -----GGTGGGAGGTGGGGTGGG-----                                                                                      | mirL    | 22  | 6     |
| -----GGTGGGAGGTGGGGTGGGCACA-----                                                                                  | mirL    | 18  | 3     |
| -----GGGAGGTGGGGTGGGCAC-----                                                                                      | mirL    | 18  | 2     |
| -----GTGGGAGGTGGGGTGGGC-----                                                                                      | mirL    | 18  | 2     |
| -----TGGGAGGTGGGGTGGGCA-----                                                                                      | mirL    | 18  | 1     |
| -----TGGTGGGAGGTGGGGTGG-----                                                                                      | mirL    | 18  | 1     |
| -----AGTGGTGGGAGGTGGGGT-----                                                                                      | mirL    | 25  | 1     |
| -----GGTGGGAGGTGGGGTGGGCACAGAG-----                                                                               | mirL    | 33  | 1     |
| -----GGTGGGAGGTGGGGTGGGCACAGAGGGAATGAC-----                                                                       | mirL    | 19  | 1     |
| -----GGGAGGTGGGGTGGGCACA-----                                                                                     | mirL    | 20  | 39    |
| -----TCCCTACCTCCCTAACATGA-----                                                                                    | mirR    | 19  | 6     |
| -----CCCTACCTCCCTAACATGA-----                                                                                     | mirR    | 18  | 2     |
| -----TCCTCCCTACCTCCCTAA-----                                                                                      | mirR    | 19  | 1     |
| -----TCCTCCCTACCTCCCTAAC-----                                                                                     | mirR    | 18  | 1     |
| -----CTCCCTACCTCCCTAACA-----                                                                                      | mirR    | 21  | 1     |
| -----TCCCTACCTCCCTAACATGAA-----                                                                                   | mirR    | 18  | 1     |
| -----TCCCTACCTCCCTAACAT-----                                                                                      | mirR    | 18  | 1     |
| -----CCTCCCTACCTCCCTAAC-----                                                                                      | mirR    | 18  | 1     |
| -----CCTACCTCCCTAACATGA-----                                                                                      | mirR    | 21  | 1     |
| -----CCTACCTCCCTAACATGAAAC-----                                                                                   | mirR    | 18  | 2     |
| -----AACCTCCAGGTTGGGGT---                                                                                         | morR    | 18  | 2     |
| -----CCCTCCAGGTTGGGGTTT---                                                                                        | morR    | 19  | 2     |
| -----GAAACCCTCCAGGTTGGGG---                                                                                       | morR    | 18  | 1     |
| -----AAACCCTCCAGGTTGGGG---                                                                                        | morR    | 18  | 1     |
| -----CCTCCAGGTTGGGGTTTG                                                                                           | morR    | 18  | 1     |

>mmu-mir-1898

|                                                                                              | species | len | reads |
|----------------------------------------------------------------------------------------------|---------|-----|-------|
| CTGTTTTGTATGAACATAGGTCAAGGTTACAGGGGATCAAGAAATATTATTCTTGATAATCTGTTACTTTGACCTAAATACTAGCTTTTAAA | morL    | 19  | 1     |
| CTGTTTTGTATGAACATAG-----                                                                     | mirL    | 22  | 124   |
| -----AGGTCAAGGTTACAGGGGATC-----                                                              | mirL    | 21  | 57    |
| -----AGGTCAAGGTTACAGGGGAT-----                                                               | mirL    | 23  | 45    |
| -----AGGTCAAGGTTACAGGGGATCA-----                                                             | mirL    | 20  | 15    |
| -----AGGTCAAGGTTACAGGGGA-----                                                                | mirL    | 21  | 12    |
| -----GGTCAAGGTTACAGGGGATC-----                                                               | mirL    | 20  | 8     |
| -----GTCAAGGTTACAGGGGATC-----                                                                | mirL    | 19  | 7     |
| -----AGGTCAAGGTTACAGGGG-----                                                                 | mirL    | 18  | 7     |
| -----ATAGTCAAGGTTACAG-----                                                                   | mirL    | 24  | 7     |
| -----AGGTCAAGGTTACAGGGGATCAA-----                                                            | mirL    | 20  | 4     |
| -----GGTCAAGGTTACAGGGGAT-----                                                                |         |     |       |

```

-----AGGTCAAGGTTACAGGGGATCAAGAAA----- mirL 28 4
-----GGTCAAGGTTACAGGGGATCA----- mirL 22 2
-----GTCAAGGTTACAGGGGA----- mirL 18 2
-----TCAAGGTTACAGGGGATCA----- mirL 20 1
-----CATAGGTCAAGGTTACACA----- mirL 18 1
-----GTCAAGGTTACAGGGGAT----- mirL 19 1
-----GTCAAGGTTACAGGGGATCAA----- mirL 22 1
-----TAGGTCAAGGTTACAGGGGATC----- mirL 23 1
-----TCAAGGTTACAGGGGATC----- mirL 19 1
-----GGTCAAGGTTACAGGGG----- mirL 18 1
-----GGTCAAGGTTACAGGGGA----- mirL 19 1
-----TCAAGGTTACAGGGGAT----- mirL 18 1
-----TCAAGAAATATTATTCTTG----- loop 19 1
-----AAGAAATATTATTCTTGT----- loop 18 1
-----TATAATCTGTTTACTTTG----- mirR 18 3
-----TAATCTGTTTACTTTGAC----- mirR 18 2
-----TATAATCTGTTTACTTTGA----- mirR 19 1
-----TTGTATAATCTGTTTACT----- mirR 18 1
-----AATCTGTTTACTTTGACC----- mirR 18 1
-----TAAATACTAGCTTTTAAA morR 18 1

```

>mmu-mir-3086

```

TCTTGGACTGCCATCCTACACTTAGATTGTAGGCCCATTTGGAAGGGTTAGCGTCTTGACCCCAATGAGCCTACAGTCTAAGTGTGGGATGGCGGAAGCC species len reads
-----GACTGCCATCCTACACTT----- morL 18 2
TCTTGGACTGCCATCCTACA----- morL 20 1
-----ACTGCCATCCTACACTTA----- morL 18 1
-----CTGCCATCCTACACTTAG----- morL 18 1
-----TAGATTGTAGGCCCATTTGGAAG----- mirL 22 25
-----TAGATTGTAGGCCCATTTGGAAG----- mirL 23 14
-----TAGATTGTAGGCCCATTTGGA----- mirL 21 13
-----TAGATTGTAGGCCCATTTGGA----- mirL 20 7
-----TAGATTGTAGGCCCATTTGG----- mirL 19 3
-----AGATTGTAGGCCCATTTGGAAG----- mirL 21 3
-----ACTTAGATTGTAGGCCCA----- mirL 18 2
-----ATTGTAGGCCCATTTGGA----- mirL 18 1
-----AGATTGTAGGCCCATTTGGAAG----- mirL 22 1
-----TAGATTGTAGGCCCATTTGGAAGGGT----- mirL 25 1
-----TAGATTGTAGGCCCATTTGGAAGGG----- mirL 24 1
-----CCCAATGAGCCTACAGTCTAAG----- mirR 22 99
-----CCCAATGAGCCTACAGTCTAA----- mirR 21 40
-----CCCCAATGAGCCTACAGTCTAA----- mirR 22 20
-----CCCAATGAGCCTACAGTCTA----- mirR 20 18
-----CCCAATGAGCCTACAGTCTAAGT----- mirR 23 13
-----CCCAATGAGCCTACAGTCT----- mirR 19 9
-----CCCCAATGAGCCTACAGTCTA----- mirR 21 7
-----CCCCAATGAGCCTACAGTCT----- mirR 20 5

```

C:\Documents and Settings\hong\Desktop\Hippocampus-total RNA.txt

```
-----CCCAATGAGCCTACAGTC----- mirR 18 5
-----CCCCAATGAGCCTACAGTCTAAG----- mirR 23 4
-----CCCCAATGAGCCTACAGTC----- mirR 19 4
-----AATGAGCCTACAGTCTAAGT----- mirR 20 1
-----CCCAATGAGCCTACAGTCTAAGTG----- mirR 24 1
-----CCAATGAGCCTACAGTCTA----- mirR 19 1
-----GTGTGGGATGGCGGAAGC----- morR 18 1
-----TGTGGGATGGCGGAAGCC morR 18 1
```

>mmu-mir-568

```
AAACAGTATACACTATATTATGTATAAATGTATACACACTTCTATATATGTCCACATATATGCGGTGTGTGTATTATACAGGTATAGGTGTGTGTGCACGCACACAGGTGCACATAGCATATCAAGT species len
--AACAGTATACACTATATT----- morL 18 2
---CAGTATACACTATATTATG----- morL 19 1
--AACAGTATACACTATATTA----- morL 19 1
AAACAGTATACACTATATTATG----- morL 22 1
-----ATGTATAAATGTATACACAC----- mirL 20 124
-----ATGTATAAATGTATACACA----- mirL 19 95
-----ATGTATAAATGTATACAC----- mirL 18 48
-----ATGTATAAATGTATACACACT----- mirL 21 12
-----TATAAATGTATACACACT----- mirL 18 2
-----GTATAAATGTATACACAC----- mirL 18 1
-----ATTATGTATAAATGTATACACA----- mirL 22 1
-----TATGTATAAATGTATACACAC----- mirL 21 1
-----TATGTATAAATGTATACACA----- mirL 20 1
-----ATAGGTGTGTGTGCACGCACAC----- mirR 22 4
-----TAGGTGTGTGTGCACGCACACAG----- mirR 23 2
-----ATAGGTGTGTGTGCACGCAC----- mirR 20 1
-----AGGTGTGTGTGCACGCAC----- mirR 18 1
-----AGGTGTGTGTGCACGCACAC----- mirR 20 1
-----AGGTGTGTGTGCACGCACA----- mirR 19 1
-----TAGGTGTGTGTGCACGCACACA----- mirR 22 1
-----TAGGTGTGTGTGCACGCACAC----- mirR 21 1
-----GTGCACATAGCATATCAAGT morR 20 1
```

>mmu-mir-762

```
TCACCTTCTTGATGTCATCTTTGGCCCGGCTCCGGGTCTCGGCCCGCACGGTCCGGCCGGCCATGCTGGCGGGGCTGGGGCCGGGACAGAGCCCCTGGCGGGGCGGCCTGTGGT species len reads
-----TGATGTCATCTTTGGCCC----- morL 18 2
TCACCTTCTTGATGTCATCTTTGGCCCG----- morL 28 1
-----TGATGTCATCTTTGGCCCG----- morL 20 1
-----CTTGATGTCATCTTTGGCC----- morL 19 1
-----CTCCGGGTCTCGGCCCGC----- mirL 18 4
-----GCTCCGGGTCTCGGCCCG----- mirL 18 1
-----CTCCGGGTCTCGGCCCGCAC----- mirL 20 1
-----CTCCGGGTCTCGGCCCGCA----- mirL 19 1
-----GTCCGGCCGGCCATGCTG----- loop 18 1
-----GGGGCTGGGGCCGGGACAGAGC----- mirR 22 71
```

```

-----GGGGCTGGGGCCGGGACAGAGCC----- mirR 23 65
-----GGGGCTGGGGCCGGGACAGAG----- mirR 21 40
-----GGGGCTGGGGCCGGGACAGA----- mirR 20 30
-----GGGGCTGGGGCCGGGACAG----- mirR 19 22
-----GGGGCTGGGGCCGGGACA----- mirR 18 15
-----GGGGCTGGGGCCGGGACAGAGCCC----- mirR 24 8
-----GGGCTGGGGCCGGGACAGAGC----- mirR 21 6
-----GGCTGGGGCCGGGACAGAGC----- mirR 20 6
-----GGCTGGGGCCGGGACAGAGCC----- mirR 21 5
-----GCTGGGGCCGGGACAGAGCC----- mirR 20 5
-----GCTGGGGCCGGGACAGAGC----- mirR 19 4
-----GGGCTGGGGCCGGGACAG----- mirR 18 3
-----GGGCTGGGGCCGGGACAGAGCC----- mirR 22 2
-----GGCTGGGGCCGGGACAGA----- mirR 18 2
-----GCTGGGGCCGGGACAGAG----- mirR 18 1
-----GGGCTGGGGCCGGGACAGAGCCCG----- mirR 24 1
-----GCGGGGCTGGGGCCGGGA----- mirR 18 1
-----GGGCTGGGGCCGGGACAGAG----- mirR 20 1
-----CGTGGCGGGGCGGCCTGTGGT morR 21 1

```

>mmu-mir-2136

```

CATATCCGCGTATCCAGTCAGGAGTCAGTTAGGAAGTTTAAAGTCTGAATTAATCTGGGTGTTGACTGAGATGTGGTGGGGACCAGACCATTT species len reads
CATATCCGCGTATCCAGTC----- morL 19 1
-----GGAGTCAGTTAGGAAGTT----- mirL 19 1
-----CAGGAGTCAGTTAGGAAG----- mirL 18 1
-----AGTCAGTTAGGAAGTTT----- mirL 18 1
-----AGGAGTCAGTTAGGAAGTT----- mirL 20 1
-----CTGGGTGTTGACTGAGATGTG----- mirR 21 105
-----CTGGGTGTTGACTGAGATG----- mirR 19 84
-----CTGGGTGTTGACTGAGATGT----- mirR 20 39
-----CTGGGTGTTGACTGAGAT----- mirR 18 19
-----CTGGGTGTTGACTGAGATGTGG----- mirR 22 12
-----TGGGTGTTGACTGAGATGT----- mirR 19 7
-----TGGGTGTTGACTGAGATG----- mirR 18 5
-----TGGGTGTTGACTGAGATGTG----- mirR 20 4
-----GGTGTGACTGAGATGTG----- mirR 18 3
-----GGGTGTTGACTGAGATGTG----- mirR 19 3
-----GGGTGTTGACTGAGATGT----- mirR 18 3
-----TCTGGGTGTTGACTGAGATGT----- mirR 21 1
-----CTGGGTGTTGACTGAGATGTGGTGG----- mirR 25 1
-----TGGGTGTTGACTGAGATGTGG----- mirR 21 1
-----CTGGGTGTTGACTGAGATGTGGT----- mirR 24 1
-----TCTGGGTGTTGACTGAGATG----- mirR 20 1
-----GTGGGGACCAGACCATTT morR 18 1

```

>mmu-mir-669d

|                                    | species | len | reads |
|------------------------------------|---------|-----|-------|
| CTTGCTCTATATGTGTGTA                | morL    | 19  | 2     |
| -----TCTATATGTGTATACT-----         | morL    | 18  | 1     |
| --TGCTCTATATGTGTGTAT-----          | morL    | 18  | 1     |
| CTTGCTCTATATGTGTGT-----            | morL    | 18  | 1     |
| -----ACTTGTGTGTGCATGTATATGT-----   | mirL    | 22  | 83    |
| -----ACTTGTGTGTGCATGTATAT-----     | mirL    | 20  | 67    |
| -----ACTTGTGTGTGCATGTATATG-----    | mirL    | 21  | 46    |
| -----ACTTGTGTGTGCATGTAT-----       | mirL    | 18  | 24    |
| -----ACTTGTGTGTGCATGTATA-----      | mirL    | 19  | 22    |
| -----ACTTGTGTGTGCATGTATATGTG-----  | mirL    | 23  | 6     |
| -----CTTGTGTGTGCATGTATATGT-----    | mirL    | 21  | 5     |
| -----CTTGTGTGTGCATGTATAT-----      | mirL    | 19  | 1     |
| -----CTTGTGTGTGCATGTATATGTG-----   | mirL    | 22  | 1     |
| -----CTTGTGTGTGCATGTATATGTGT-----  | mirL    | 23  | 1     |
| -----TACTTGTGTGTGCATGTATAT-----    | mirL    | 21  | 1     |
| -----ACTTGTGTGTGCATGTATATGTGT----- | mirL    | 24  | 1     |
| -----TACTTGTGTGTGCATGTATATGT-----  | mirL    | 23  | 1     |
| -----CTTGTGTGTGCATGTATATG-----     | mirL    | 20  | 1     |
| -----ATATACATACACCCCATATAC-----    | mirR    | 22  | 14    |
| -----TATACATACACCCCATATAC-----     | mirR    | 21  | 6     |
| -----ATATACATACACCCCATATACA-----   | mirR    | 23  | 1     |
| -----ATACATACACCCCATATAC-----      | mirR    | 20  | 1     |
| -----TACATACACCCCATATACACA-----    | mirR    | 22  | 1     |
| -----CACGCATGCATGCACACACAC-----    | morR    | 21  | 1     |
| -----ACGCATGCATGCACACACACA-----    | morR    | 21  | 1     |
| -----CGCATGCATGCACACACAC-----      | morR    | 19  | 1     |
| -----CACGCATGCATGCACACACACA-----   | morR    | 22  | 1     |
| -----CACACGCATGCATGCACA-----       | morR    | 18  | 1     |

>mmu-mir-467h

```
CTTCCCTTTGTCTGAACTTAAATTTTCACTTTTGTCTCATGTATATGTGTATGTGTGCGGTGTACATAATTATATCTATGTGTGCATGTATGTGGACATAAGTGTGTGCATGTATATGTGTGTGGTGTACATAA
-TTCCCTTTGTCTGAACTTAA-----
-TTCCCTTTGTCTGAACTTAA-----
-TTCCCTTTGTCTGAACTT-----
-TTCCCTTTGTCTGAACTTAAAT-----
--TCCCTTTGTCTGAACTTAA-----
--TCCCTTTGTCTGAACTTAA-----
---CCCTTTGTCTGAACTTAA-----
--TCCCTTTGTCTGAACTTAAAT-----
CTTCCCTTTGTCTGAACTTAA-----
CTTCCCTTTGTCTGAACT-----
-----AATTTTCACTTTTGTCTTTT-----
-----AATTTTCACTTTTGTCTTTT-----
-----TTTTCACTTTTGTCTTTT-----
-----AATTTTCACTTTTGTCTTTT-----
```



```
-----AATTTTCACCTTTTGTTCCT-----  
-----ATTTTCACCTTTTGTTCCT-----  
-----TTCACCTTTTGTTCCT-----  
-----TTTTCACCTTTTGTTCCT-----  
-----ATTTTCACCTTTTGTTCCT-----  
-----TAATTTTCACCTTTTGTTCCT-----  
-----TTTTTCACCTTTTGTTCCT-----  
-----AATTTTCACCTTTTGTTCCT-----  
-----ATTTTCACCTTTTGTTCCT-----  
-----TAATTTTCACCTTTTGTTCCT-----  
-----TTCACCTTTTGTTCCTCA-----  
-----  
-----  
-----  
-----  
-----  
-----  
-----  
-----  
-----  
-----  
-----  
-----
```

>mmu-mir-711

| Sequence                                                                                    | species | len | reads |
|---------------------------------------------------------------------------------------------|---------|-----|-------|
| TCCCATGTCCTAACTTTGAATCTCTTCTTAGGGTGCTTCAGGCAAAGCTGGGGACCCGGGGAGAGATGTAAGTCTGGGGAGATGTCAAGGT | morL    | 19  | 4     |
| -CCCATGTCCTAACTTTGA                                                                         | morL    | 18  | 1     |
| -CCATGTCCTAACTTTGA                                                                          | morL    | 20  | 1     |
| TCCCATGTCCTAACTTTGA                                                                         | morL    | 20  | 1     |
| -----CTCTTCTTAGGGTGCTTC-----                                                                | mirL    | 18  | 2     |
| -----TTCTTAGGGTGCTTCAGGC-----                                                               | mirL    | 19  | 2     |
| -----TCTTCTTAGGGTGCTTCA-----                                                                | mirL    | 18  | 1     |
| -----CTTCTTAGGGTGCTTCAG-----                                                                | mirL    | 18  | 1     |
| -----GGGACCCGGGGAGAGATGTAAG-----                                                            | mirR    | 22  | 55    |
| -----GGGACCCGGGGAGAGATGTAA-----                                                             | mirR    | 21  | 35    |
| -----GACCCGGGGAGAGATGTAAG-----                                                              | mirR    | 20  | 33    |
| -----GACCCGGGGAGAGATGTAA-----                                                               | mirR    | 19  | 28    |
| -----ACCCGGGGAGAGATGTAA-----                                                                | mirR    | 18  | 20    |
| -----GGACCCGGGGAGAGATGTAA-----                                                              | mirR    | 20  | 17    |
| -----GGACCCGGGGAGAGATGTAAG-----                                                             | mirR    | 21  | 16    |
| -----ACCCGGGGAGAGATGTAAG-----                                                               | mirR    | 19  | 15    |
| -----GGGACCCGGGGAGAGATGT-----                                                               | mirR    | 19  | 10    |
| -----GGGACCCGGGGAGAGATG-----                                                                | mirR    | 18  | 9     |
| -----GGGACCCGGGGAGAGATGTAAGT-----                                                           | mirR    | 23  | 3     |
| -----GACCCGGGGAGAGATGTAAGT-----                                                             | mirR    | 21  | 3     |
| -----GGACCCGGGGAGAGATGT-----                                                                | mirR    | 18  | 3     |
| -----ACCCGGGGAGAGATGTAAGT-----                                                              | mirR    | 20  | 3     |
| -----GGGACCCGGGGAGAGATGT-----                                                               | mirR    | 20  | 2     |

C:\Documents and Settings\hong\Desktop\Hippocampus-total RNA.txt

```
-----GACCCGGGGAGAGATGTA----- mirR 18 1
-----GGGACCCGGGGAGAGATGTAAGTCTG----- mirR 26 1
-----GGACCCGGGGAGAGATGTA----- mirR 19 1
-----GGGGACCCGGGGAGAGATGTAAG----- mirR 23 1
-----GACCCGGGGAGAGATGTAAGTC----- mirR 22 1
-----TCTGGGGAGATGTCAAGGT morR 19 1
```

>mmu-mir-1945

```
GCTGAACTCCGACTCCCCTCAGCCCCGAGAAAACCGCACCGGGTCTTCGCGGGTACTGTCGGGACTTGTAGTTTAGCTATCGGC species len reads
GCTGAACTCCGACTCCCG----- morL 18 2
-----CCGTCAGCCCCCGAGAAAA----- mirL 19 2
-----TCCCCTCAGCCCCCGAGA----- mirL 18 1
-----GTCAGCCCCCGAGAAAAC----- mirL 18 1
-----TCCCCTCAGCCCCCGAGAAAA----- mirL 21 1
-----TCTTCGCGGGTACTGTCGGGAC----- mirR 22 84
-----TCTTCGCGGGTACTGTCGGGACT----- mirR 23 63
-----TCTTCGCGGGTACTGTCGG----- mirR 19 13
-----TCTTCGCGGGTACTGTCGGGA----- mirR 21 9
-----CTTCGCGGGTACTGTCGGGACT----- mirR 22 8
-----TCGCGGGTACTGTCGGGACT----- mirR 20 8
-----TCGCGGGTACTGTCGGGAC----- mirR 19 8
-----TCTTCGCGGGTACTGTCGGG----- mirR 20 7
-----CTTCGCGGGTACTGTCGGGAC----- mirR 21 7
-----TTTCGCGGGTACTGTCGGGAC----- mirR 20 6
-----TCTTCGCGGGTACTGTCG----- mirR 18 6
-----CTTCGCGGGTACTGTCGG----- mirR 18 4
-----TCTTCGCGGGTACTGTCGGGACTTGTAG----- mirR 28 3
-----GGGTCTTCGCGGGTACTG----- mirR 18 3
-----TTTCGCGGGTACTGTCGGGACT----- mirR 21 3
-----TCGCGGGTACTGTCGGGA----- mirR 18 2
-----CTTCGCGGGTACTGTCGGGA----- mirR 20 1
-----CTTCGCGGGTACTGTCGGG----- mirR 19 1
-----TTCGCGGGTACTGTCGGG----- mirR 18 1
-----TCGCGGGTACTGTCGGGACTT----- mirR 21 1
-----GGGTCTTCGCGGGTACTGT----- mirR 19 1
-----TTGTAGTTTAGCTATCGGC morR 19 1
-----ACTTGTAGTTTAGCTATC--- morR 18 1
```

>mmu-mir-466b-3

```
GTGAATATGATATACAAATACATACACGCACACATAAGAC species len reads
GTGAATATGATATACAAAT----- loop 19 1
-----AATACATACACGCACACATAA--- mirR 21 124
-----AATACATACACGCACACATAAG-- mirR 22 34
-----AATACATACACGCACACAT----- mirR 19 29
-----AATACATACACGCACACATA---- mirR 20 22
-----AATACATACACGCACACA----- mirR 18 16
```

```

-----AATACATACACGCACACATAAGA- mirR 23 10
-----AATACATACACGCACACATAAGAC mirR 24 2
-----ACAAATACATACACGCACACA----- mirR 21 2
-----AAATACATACACGCACACA----- mirR 19 1
-----AAATACATACACGCACAC----- mirR 18 1

```

>mmu-mir-467c

```

CCTATGCATGTGCCCTTTGTGCATAAGTGCCTGCATGTATATGTGTGTATATTTTATGCATATACATACACACACCTATACACACATGCACACAGAC species len reads
--TATGCATGTGCCCTTTGTG----- morL 18 1
-CTATGCATGTGCCCTTTGTG----- morL 19 1
CCTATGCATGTGCCCTTTGT----- morL 19 1
----TGCATGTGCCCTTTGTGCA----- morL 18 1
-----TAAGTGCCTGCATGTATATGT----- mirL 21 71
-----ATAAGTGCCTGCATGTATATGT----- mirL 22 55
-----TAAGTGCCTGCATGTATA----- mirL 18 20
-----TAAGTGCCTGCATGTATAT----- mirL 19 15
-----TAAGTGCCTGCATGTATATGTGT----- mirL 23 14
-----TAAGTGCCTGCATGTATATG----- mirL 20 13
-----ATAAGTGCCTGCATGTATAT----- mirL 20 12
-----AAGTGCCTGCATGTATATGT----- mirL 20 5
-----ATAAGTGCCTGCATGTATATG----- mirL 21 4
-----TAAGTGCCTGCATGTATATGTG----- mirL 22 3
-----ATAAGTGCCTGCATGTAT----- mirL 18 2
-----ATAAGTGCCTGCATGTATATGTG----- mirL 23 2
-----AAGTGCCTGCATGTATAT----- mirL 18 2
-----TAAGTGCCTGCATGTATATGTGT----- mirL 25 1
-----AAGTGCCTGCATGTATATGTG----- mirL 21 1
-----AAGTGCCTGCATGTATATGTG----- mirL 23 1
-----ATAAGTGCCTGCATGTATA----- mirL 19 1
-----AGTGCCTGCATGTATATGT----- mirL 19 1
-----AGTGCCTGCATGTATATG----- mirL 18 1
-----GTGCCTGCATGTATATGT----- mirL 18 1
-----ATATACATACACACACCTATAC----- mirR 22 5
-----TATACATACACACACCTATAC----- mirR 21 1
-----ATACATACACACACCTATAC----- mirR 20 1
-----TACACACATGCACACAGAC morR 19 1

```

>mmu-mir-804

```

GAGCGAGTCTCTGGAAGTCCCTACACATCCATCTTTGAGGTTACAACCTCCCAGTAGACTGTTTCTGACATTCCTTGTGAGTTGTTCTCACCTGGAAGATGTGGTGGCGGTGCCCAA species len reads
--GCGAGTCTCTGGAAGTCC----- morL 18 2
GAGCGAGTCTCTGGAAGTCCC----- morL 21 1
-----CCTACACATCCATCTTTG----- mirL 18 13
-----TACACATCCATCTTTGAGG----- mirL 19 2
-----CCTACACATCCATCTTTGA----- mirL 19 2
-----ACACATCCATCTTTGAGGT----- mirL 19 1
-----CCCTACACATCCATCTTTGAG----- mirL 21 1

```

```

-----CCTACACATCCATCTTTGAG----- mirL 20 1
-----TCCCTACACATCCATCTT----- mirL 18 1
-----CCCTACACATCCATCTTT----- mirL 18 1
-----TCCCTACACATCCATCTTT----- mirL 19 1
-----TGTGAGTTGTTTCCTCACCTGG----- mirR 21 127
-----TGTGAGTTGTTTCCTCACCTGGA----- mirR 22 22
-----TGTGAGTTGTTTCCTCACCTG----- mirR 20 17
-----GTGAGTTGTTTCCTCACCTGG----- mirR 20 8
-----GAGTTGTTTCCTCACCTGG----- mirR 18 7
-----TGAGTTGTTTCCTCACCTG----- mirR 18 7
-----TGTGAGTTGTTTCCTCACCT----- mirR 19 4
-----TGAGTTGTTTCCTCACCTGG----- mirR 19 3
-----GAGTTGTTTCCTCACCTGGA----- mirR 19 3
-----CCTTGTGAGTTGTTTCCTC----- mirR 18 2
-----TGTGAGTTGTTTCCTCACC----- mirR 18 2
-----GTGAGTTGTTTCCTCACCT----- mirR 18 1
-----GTGAGTTGTTTCCTCACCTG----- mirR 19 1
-----TTGTGAGTTGTTTCCTCACCTGG----- mirR 22 1
-----TGTGAGTTGTTTCCTCACCTGGAA----- mirR 23 1
-----GTGAGTTGTTTCCTCACCTGGAA----- mirR 22 1
-----ATGTGGTGGCGGTGCCCAA morR 19 1
-----ATGTGGTGGCGGTGCCCAA- morR 18 1

```

>mmu-mir-2139

```

CCACTGGAGAAGGAGCAGAGGGCCAGGACTGGCATTGGACATGCAGCTGCCAGCAAGGTGGTGCTGTCCGACGTGCGCTGCTCCTGGTAACTGCGGC species len reads
--ACTGGAGAAGGAGCAGAG----- morL 18 4
-CACTGGAGAAGGAGCAGAG----- morL 19 3
--CTGGAGAAGGAGCAGAG----- morL 18 2
CCACTGGAGAAGGAGCAG----- morL 18 1
-----GGGCCAGGACTGGCATT----- mirL 18 4
-----CCAGGACTGGCATTGGAC----- mirL 19 1
-----CCAGGACTGGCATTGGAA----- mirL 18 1
-----AGAGGGCCAGGACTGGCATT----- mirL 20 1
-----AGCTGCGCTGCTCCTGGTAACTGC--- mirR 24 72
-----AGCTGCGCTGCTCCTGGTAACTG--- mirR 23 37
-----AGCTGCGCTGCTCCTGGTAACT--- mirR 22 19
-----AGCTGCGCTGCTCCTGGTAACTGCG-- mirR 25 18
-----AGCTGCGCTGCTCCTGGTAACT--- mirR 21 14
-----AGCTGCGCTGCTCCTGGTAA--- mirR 20 10
-----AGCTGCGCTGCTCCTGGT--- mirR 18 9
-----TGCGCTGCTCCTGGTAACTGC--- mirR 21 7
-----GCTGCGCTGCTCCTGGTAACTG--- mirR 22 5
-----GCTGCGCTGCTCCTGGTAA--- mirR 18 4
-----TGCGCTGCTCCTGGTAACTG--- mirR 20 4
-----GCTGCGCTGCTCCTGGTAACTGC--- mirR 23 3
-----GCTGCGCTGCTCCTGGTAACT--- mirR 21 2

```

```

-----TGCCTGCTCCTGGTAACT----- mirR 19 2
-----CTGCGCTGCTCCTGGTAACTGC--- mirR 22 2
-----CTGCGCTGCTCCTGGTAACT--- mirR 19 1
-----CAGCTGCGCTGCTCCTGGT--- mirR 19 1
-----CTGCGCTGCTCCTGGTAACT--- mirR 20 1
-----TGCCTGCTCCTGGTAACTGCGGC mirR 24 1
-----CGCAGCTGCGCTGCTCCT--- mirR 18 1
-----CTGCGCTGCTCCTGGTAACTG--- mirR 21 1

```

>mmu-mir-3062

| Species | len | reads |
|---------|-----|-------|
| morL    | 18  | 1     |
| morL    | 18  | 1     |
| morL    | 18  | 1     |
| mirL    | 22  | 122   |
| mirL    | 23  | 23    |
| mirL    | 21  | 22    |
| mirL    | 24  | 11    |
| mirL    | 18  | 8     |
| mirL    | 24  | 3     |
| mirL    | 25  | 1     |
| mirL    | 20  | 1     |
| loop    | 18  | 8     |
| loop    | 21  | 5     |
| loop    | 22  | 2     |
| loop    | 20  | 2     |
| loop    | 19  | 1     |
| loop    | 21  | 1     |
| mir     | 20  | 4     |
| mirR    | 18  | 2     |
| mirR    | 21  | 2     |
| mirR    | 18  | 2     |
| mir     | 19  | 2     |
| mirR    | 23  | 1     |
| mirR    | 22  | 1     |
| mirR    | 18  | 1     |
| morR    | 19  | 1     |
| morR    | 18  | 1     |

>mmu-mir-466f-4

```

GCATCTGCATCTGTGTGTCTACGTGTGTGCATGTGCATGTGTGTGTATCTGTATGTGAGTGTGTGCATGCATGTGTGTGCATCTATATCTGTGTGTCTACTTGTGTGTGAATGTGCATATGTGTATGTATGTGAGTGTG
-CATCTGCATCTGTGTGTCTAC-----
GCATCTGCATCTGTGTGT-----
--TCTGCATCTGTGTGTCTA-----
-CATCTGCATCTGTGTGTCT-----
-----ACGTGTGTGTGCATGTGCATGT-----

```

```
-----TACGTGTGTGTGCATGTGCAT-----  
-----ACGTGTGTGTGCATGTGCATG-----  
-----TACGTGTGTGTGCATGTGCATG-----  
-----ACGTGTGTGTGCATGTGCA-----  
-----ACGTGTGTGTGCATGTGCAT-----  
-----ACGTGTGTGTGCATGTGC-----  
-----ACGTGTGTGTGCATGTGCATGTG-----  
-----TACGTGTGTGTGCATGTG-----  
-----TACGTGTGTGTGCATGTGCATGT-----  
-----CGTGTGTGTGCATGTGCAT-----  
-----TCTACGTGTGTGTGCATGTGC-----  
-----TACGTGTGTGTGCATGTGCA-----  
-----CGTGTGTGTGCATGTGCATGT-----  
-----TACGTGTGTGTGCATGTGC-----  
-----ATGTATGTGAGTGTG-----  
-----GTATGTATGTGAGTGTG-----  
-----TGTATGTATGTGAGTGTG-----  
-----TATGTGAGTGTG-----  
-----TATGTGAGTGTG-----  
-----ATGTATGTGAGTGTG-----  
-----TGTATGTGAGTGTG-----  
-----  
-----  
-----  
-----  
-----  
-----  
-----  
-----  
-----  
-----  
-----  
-----  
-----  
-----  
-----  
-----  
-----
```

>mmu-mir-216a

| ACCTGGATGGCTATGAGTTGGTTTAATCTCAGCTGGCAACTGTGAGATGTCCCTATCATTCCCTCACAGTGGTCTCTGGGATTATGCTAAACAGAGCAATTCCTT | species | len | reads |
|-----------------------------------------------------------------------------------------------------------|---------|-----|-------|
| --CTGGATGGCTATGAGTTG-----                                                                                 | morL    | 18  | 1     |
| ACCTGGATGGCTATGAGTTGG-----                                                                                | morL    | 21  | 1     |
| -----TAATCTCAGCTGGCAACTGTGAG-----                                                                         | mirL    | 23  | 41    |
| -----TAATCTCAGCTGGCAACT-----                                                                              | mirL    | 18  | 24    |
| -----TAATCTCAGCTGGCAACTGTGAGA-----                                                                        | mirL    | 24  | 23    |
| -----TAATCTCAGCTGGCAACTGTGA-----                                                                          | mirL    | 22  | 20    |
| -----TAATCTCAGCTGGCAACTGT-----                                                                            | mirL    | 20  | 13    |
| -----TAATCTCAGCTGGCAACTGTG-----                                                                           | mirL    | 21  | 13    |
| -----TAATCTCAGCTGGCAACTG-----                                                                             | mirL    | 19  | 11    |
| -----AATCTCAGCTGGCAACTGTGAG-----                                                                          | mirL    | 22  | 6     |
| -----AATCTCAGCTGGCAACTG-----                                                                              | mirL    | 18  | 4     |
| -----TCTCAGCTGGCAACTGTGA-----                                                                             | mirL    | 19  | 4     |
| -----TCTCAGCTGGCAACTGTG-----                                                                              | mirL    | 18  | 4     |
| -----ATCTCAGCTGGCAACTGTG-----                                                                             | mirL    | 19  | 3     |
| -----AATCTCAGCTGGCAACTGTGA-----                                                                           | mirL    | 21  | 3     |
| -----ATCTCAGCTGGCAACTGT-----                                                                              | mirL    | 18  | 2     |
| -----AATCTCAGCTGGCAACTGTGAGA-----                                                                         | mirL    | 23  | 2     |

```

-----ATCTCAGCTGGCAACTGTGA----- mirL 20 2
-----TCTCAGCTGGCAACTGTGAG----- mirL 20 2
-----AATCTCAGCTGGCAACTGTG----- mirL 20 1
-----AATCTCAGCTGGCAACTGT----- mirL 19 1
-----ATCTCAGCTGGCAACTGTGAG----- mirL 21 1
-----AGATGTCCCTATCATTCT----- loop 19 1
-----TGTCCCTATCATTCTCA----- loop 18 1
-----CACAGTGGTCTCTGGGATTAT----- mirR 21 17
-----CACAGTGGTCTCTGGGAT----- mirR 18 4
-----CACAGTGGTCTCTGGGATTATGC----- mirR 23 3
-----CACAGTGGTCTCTGGGATTA----- mirR 20 3
-----ACAGTGGTCTCTGGGATTATG----- mirR 21 3
-----ACAGTGGTCTCTGGGATTATGC----- mirR 22 1
-----CACAGTGGTCTCTGGGATT----- mirR 19 1
-----TCACAGTGGTCTCTGGGAT----- mirR 19 1
-----AGTGGTCTCTGGGATTAT----- mirR 18 1
-----TCACAGTGGTCTCTGGGATTA----- mirR 21 1
-----TCACAGTGGTCTCTGGGA----- mirR 18 1
-----TGCTAAACAGAGCAATTT----- morR 18 2
-----CTAAACAGAGCAATTTCC-- morR 18 2
-----TAAACAGAGCAATTTTCCTT morR 19 1

```

>mmu-mir-1251

```

GGACTCTAGCTGCCAAAGGCGCTTCTCCTTCTGAACAGAGCGCTTTGCTCAGCCAGTGTAGACATGGCCTGATAAACT species len reads
--ACTCTAGCTGCCAAAGGCGCT----- mirL 21 56
--ACTCTAGCTGCCAAAGGCGCTT----- mirL 22 27
--ACTCTAGCTGCCAAAGGCGC----- mirL 20 27
--ACTCTAGCTGCCAAAGGCGCTTC----- mirL 23 24
--ACTCTAGCTGCCAAAGGCGCTTCT----- mirL 24 16
---TCTAGCTGCCAAAGGCGCT----- mirL 19 5
--ACTCTAGCTGCCAAAGGC----- mirL 18 5
--ACTCTAGCTGCCAAAGGCG----- mirL 19 4
---CTAGCTGCCAAAGGCGCT----- mirL 18 4
---CTCTAGCTGCCAAAGGCGCTTC----- mirL 22 1
GGACTCTAGCTGCCAAAG----- mirL 18 1
---TCTAGCTGCCAAAGGCGC----- mirL 18 1
---CTCTAGCTGCCAAAGGCGCT----- mirL 20 1
-----GCTTCTCCTTCTGAACAG----- loop 18 1
-----CTTCTCCTTCTGAACAGA----- loop 18 1
-----AGCGCTTTGCTCAGCCAGTGT----- mirR 21 11
-----CGCTTTGCTCAGCCAGTGTAG----- mirR 21 8
-----CGCTTTGCTCAGCCAGTGTAGAC----- mirR 23 7
-----GCGCTTTGCTCAGCCAGTGTAG----- mirR 22 7
-----AGCGCTTTGCTCAGCCAGTGTAG----- mirR 23 4
-----CGCTTTGCTCAGCCAGTGTAGA----- mirR 22 4
-----CGCTTTGCTCAGCCAGTGT----- mirR 19 2

```

```
-----CGCTTTGCTCAGCCAGTGTA----- mirR 20 1
-----AGCGCTTTGCTCAGCCAGTG----- mirR 20 1
-----GAGCGCTTTGCTCAGCCAGTGT----- mirR 22 1
-----GCGCTTTGCTCAGCCAGTGTA----- mirR 23 1
-----ACATGGCCTGATAAACACT morR 19 1
```

>mmu-mir-2137

```
TCTTCCAACCTCTTTTTTCCACGTAGTATACCTCCTTCTGCTGCCTTGTGGCTTGCCGGCGGGAGCCCCAGGGAGTAGAGCATTGCAGACAGGC species len reads
---TCCAACCTCTTTTTTCCAC----- morL 19 23
---CCAACCTCTTTTTTCCAC----- morL 18 2
---CAACTCTTTTTTCCACG----- morL 18 2
---CAACTCTTTTTTCCACGT----- morL 19 1
TCTTCCAACCTCTTTTTTCC----- morL 20 1
---CCAACCTCTTTTTTCCACGT----- morL 20 1
---TAGTATACCTCCTTCCTG----- mirL 18 3
---ACGTAGTATACCTCCTTC----- mirL 18 1
---TGCTGCCTTGTGGCTTG----- loop 18 1
-----GCCGGCGGGAGCCCCAGGGA----- mirR 20 54
-----GCCGGCGGGAGCCCCAGGGAG----- mirR 21 38
-----GCCGGCGGGAGCCCCAGGGAGT----- mirR 22 26
-----CGGCGGGAGCCCCAGGGA----- mirR 18 18
-----GCCGGCGGGAGCCCCAGG----- mirR 18 6
-----GCCGGCGGGAGCCCCAGGG----- mirR 19 6
-----CGGCGGGAGCCCCAGGGAG----- mirR 19 6
-----CCGGCGGGAGCCCCAGGGAG----- mirR 20 5
-----CCGGCGGGAGCCCCAGGGA----- mirR 19 3
-----GGCGGGAGCCCCAGGGAG----- mirR 18 3
-----CGGCGGGAGCCCCAGGGAGT----- mirR 20 3
-----GCCGGCGGGAGCCCCAGGGAGTA----- mirR 23 2
-----GCCGGCGGGAGCCCCAGGGAGTAGA----- mirR 25 1
-----GGCGGGAGCCCCAGGGAGT----- mirR 19 1
-----CCGGCGGGAGCCCCAGGGAGT----- mirR 21 1
-----TAGAGCATTGCAGACAGGC morR 19 1
```

>mmu-mir-297a-3

```
ATATGTATGTGTGCATGTGCATGTGTATATGAATATACATATACATACACACATACCCATACAAACATGCACACAAACACACAGAAAATTGCACTCA species len reads
--ATGTATGTGTGCATGTGCATGT----- mirL 22 96
--ATGTATGTGTGCATGTGCATG----- mirL 21 24
--ATGTATGTGTGCATGTGC----- mirL 18 20
--ATGTATGTGTGCATGTGCA----- mirL 19 19
--ATGTATGTGTGCATGTGCAT----- mirL 20 11
--ATGTATGTGTGCATGTGCATGTG----- mirL 23 6
---TGTATGTGTGCATGTGCATGT----- mirL 21 4
ATATGTATGTGTGCATGTG----- mirL 19 2
--TATGTATGTGTGCATGTGCATGT----- mirL 23 2
----GTATGTGTGCATGTGCATGT----- mirL 20 1
```



```

-TATGTATGTGTGCATGTGCAT----- mirL 21 1
--TGTATGTGTGCATGTGCAT----- mirL 19 1
---GTATGTGTGCATGTGCATG----- mirL 19 1
-----CACACAGAAAATTGACAC--- mirR 18 5
-----AACACACAGAAAATTGAC---- mirR 18 3
-----AACACACAGAAAATTGACACT-- mirR 21 1
-----ACACAGAAAATTGACACTC- mirR 19 1
-----ACAGAAAATTGACTCA mirR 18 1

```

>mmu-mir-4661

```

GTTTGTGTGTACATGTACATGTATATATATATTGATATACATATAAATACATGCACACATATTCATGCATGCACACGCACAC species len reads
-TTTGTGTGTACATGTACAT----- mirL 19 1
GTTTGTGTGTACATGTACATGT----- mirL 22 1
-TTTGTGTGTACATGTACA----- mirL 18 1
--TTGTGTGTACATGTACAT----- mirL 18 1
-----TATATATATATTGATATACA----- loop 20 1
-----TATAAATACATGCACACATATT----- mirR 22 58
-----TATAAATACATGCACACATATTC----- mirR 23 30
-----TATAAATACATGCACACATAT----- mirR 21 21
-----TATAAATACATGCACACAT----- mirR 19 15
-----ATAAATACATGCACACATATT----- mirR 21 14
-----TATAAATACATGCACACATA----- mirR 20 12
-----AAATACATGCACACATATT----- mirR 19 10
-----TATAAATACATGCACACACA----- mirR 18 5
-----ATAAATACATGCACACAT----- mirR 18 4
-----ATAAATACATGCACACATAT----- mirR 20 4
-----ATAAATACATGCACACATA----- mirR 19 3
-----TAAATACATGCACACATAT----- mirR 19 2
-----TAAATACATGCACACATATTC----- mirR 21 2
-----TATAAATACATGCACACATATTCATGCA----- mirR 28 2
-----AAATACATGCACACATAT----- mirR 18 2
-----TAAATACATGCACACATAT----- mirR 20 1
-----ATAAATACATGCACACATATTCATGC----- mirR 26 1
-----TAAATACATGCACACATA----- mirR 18 1
-----ATAAATACATGCACACATATTCATGCATGC----- mirR 30 1
-----ATAAATACATGCACACATATTC----- mirR 22 1
-----ATTCATGCATGCACACGCA--- morR 19 1
-----ATGCATGCACACGCACAC morR 18 1
-----TCATGCATGCACACGCACAC morR 20 1
-----ATTCATGCATGCACACGC---- morR 18 1
-----TTCATGCATGCACACGCA--- morR 18 1

```

>mmu-mir-3074-1

```

TGCTCAAGGGCTCGACTCCTGTTCCCTGCTGAACTGAGCCAGTGTGTGAAATGAGAACTGATATCAGCTCAGTAGGCACCGGAGGGCGGGTCCAATC species len reads
TGCTCAAGGGCTCGACTCCT----- morL 20 1
---TCAAGGGCTCGACTCCTG----- morL 18 1

```

```

---TCAAGGGCTCGACTCCTGT----- morL 19 1
--CTCAAGGGCTCGACTCCT----- morL 18 1
-----GTTCCCTGCTGAACTGAGCCA----- mirL 20 5
-----GTTCCCTGCTGAACTGAGCCAGT----- mirL 22 3
-----TGTTCCCTGCTGAACTGAGCCA----- mirL 21 3
-----CTGTTCCCTGCTGAACTGAGCCA----- mirL 22 3
-----GTTCCCTGCTGAACTGAGCCAGTG----- mirL 23 2
-----TTCCTGCTGAACTGAGCCA----- mirL 19 1
-----CCTGTTCCCTGCTGAACTG----- mirL 18 1
-----TTCCTGCTGAACTGAGCCAGTG----- mirL 22 1
-----CTGTTCCCTGCTGAACTGA----- mirL 18 1
-----CTGTTCCCTGCTGAACTGAGCC----- mirL 21 1
-----TTCCTGCTGAACTGAGCCAGT----- mirL 21 1
-----TGTTCCCTGCTGAACTGAGCCAGT----- mirL 23 1
-----CCTGTTCCCTGCTGAACTGAGCCA----- mirL 23 1
-----GTTCCCTGCTGAACTGAGC----- mirL 18 1
-----TCCTGCTGAACTGAGCCA----- mirL 18 1
-----AGTGTGTGAAATGAGAAC----- loop 18 7
-----GTGTGTGAAATGAGAACT----- loop 18 1
-----AGTGTGTGAAATGAGAACT----- loop 19 1
-----GATATCAGCTCAGTAGGCACCGG----- mirR 23 46
-----GATATCAGCTCAGTAGGCACCG----- mirR 22 23
-----GATATCAGCTCAGTAGGCACCGGA----- mirR 24 21
-----GATATCAGCTCAGTAGGCAC----- mirR 20 16
-----GATATCAGCTCAGTAGGCACC----- mirR 21 15
-----TGATATCAGCTCAGTAGGCACCG----- mirR 23 7
-----GATATCAGCTCAGTAGGC----- mirR 18 6
-----TGATATCAGCTCAGTAGGCACCGG----- mirR 24 5
-----TGATATCAGCTCAGTAGGCAC----- mirR 21 4
-----GATATCAGCTCAGTAGGCA----- mirR 19 3
-----ATATCAGCTCAGTAGGCACCGGA----- mirR 23 2
-----TGATATCAGCTCAGTAGGCACCGGA----- mirR 25 2
-----TGATATCAGCTCAGTAGGCACC----- mirR 22 2
-----ATCAGCTCAGTAGGCACCGGA----- mirR 21 1
-----ATATCAGCTCAGTAGGCACCG----- mirR 21 1
-----ATCAGCTCAGTAGGCACCG----- mirR 19 1
-----TATCAGCTCAGTAGGCAC----- mirR 18 1
-----TGATATCAGCTCAGTAGGCACCGGAGGG----- mirR 28 1
-----TGATATCAGCTCAGTAGGC----- mirR 19 1
-----CGGAGGGCGGGTCCAATC morR 18 1

>mmu-mir-297a-2
GTTTCATGCATGTGTGTATGTGCATGCATATGTGCTCATGTGTGTGTACATGTATGTGTGCATGTGCATGTATATATGTGTGTGCATGCATGTGTAC species len reads
GTTTCATGCATGTGTGTAT----- morL 18 1
-----ATGTGCATGCATATGTGC----- mirL 18 1
-----GCTCATGTGTGTGTACATG----- loop 19 2

```

```

-----TGCTCATGTGTGTGTACA----- loop 18 1
-----ATGTATGTGTGCATGTGCATGT----- mirR 22 96
-----ATGTATGTGTGCATGTGCATG----- mirR 21 24
-----ATGTATGTGTGCATGTGC----- mirR 18 20
-----ATGTATGTGTGCATGTGCA----- mirR 19 19
-----ATGTATGTGTGCATGTGCAT----- mirR 20 11
-----ATGTATGTGTGCATGTGCATGTA----- mirR 23 4
-----TGTATGTGTGCATGTGCATGT----- mirR 21 4
-----GTATGTGTGCATGTGCATG----- mirR 19 1
-----TGTATGTGTGCATGTGCAT----- mirR 19 1
-----GTATGTGTGCATGTGCATGT----- mirR 20 1
-----ATGTATGTGTGCATGTGCATGTAT----- mirR 24 1
-----TATATATGTGTGTGCATGC----- morR 19 2
-----ATATGTGTGTGCATGCATGTGT-- morR 22 2
-----ATATGTGTGTGCATGCATGTGTAC morR 24 1
-----TATATATGTGTGTGCATGCAT----- morR 21 1
-----GTATATATGTGTGTGCATGC----- morR 20 1
-----TATATGTGTGTGCATGCA----- morR 18 1
-----GTATATATGTGTGTGCATGCA----- morR 21 1
-----TATATGTGTGTGCATGCATGT---- morR 21 1
-----TGTATATATGTGTGTGCAT----- morR 19 1

>mmu-mir-344e
GATTTGATCAGTCAGGCTTCTGGCTATATTCCAGGACTTACCTGGTCCCTGGATATAACCAAAGCCTGACTATATGGTCTAAAGACAAGGAAG species len reads
GATTTGATCAGTCAGGCT----- morL 18 8
GATTTGATCAGTCAGGCTTC----- morL 20 6
GATTTGATCAGTCAGGCTT----- morL 19 1
-----TCTGGCTATATTCCAGGA----- mirL 18 5
-----TTCTGGCTATATTCCAGGA----- mirL 19 1
-----TCTGGCTATATTCCAGGAC----- mirL 19 1
-----GGACTTACCTGGTCCCTGG----- loop 18 1
-----ACTTACCTGGTCCCTGGAT----- loop 18 1
-----GATATAACCAAAGCCTGACTAT----- mirR 22 133
-----GATATAACCAAAGCCTGACT----- mirR 20 10
-----GATATAACCAAAGCCTGACTA----- mirR 21 6
-----GATATAACCAAAGCCTGAC----- mirR 19 5
-----GATATAACCAAAGCCTGACTATA----- mirR 23 5
-----GATATAACCAAAGCCTGA----- mirR 18 2
-----TGGATATAACCAAAGCCTGAC----- mirR 21 2
-----CTGGATATAACCAAAGCCTGA----- mirR 21 2
-----GATATAACCAAAGCCTGACTATAT----- mirR 24 1
-----TGGATATAACCAAAGCCTGA----- mirR 20 1
-----GGATATAACCAAAGCCTGAC----- mirR 20 1
-----TGGATATAACCAAAGCCTGACT----- mirR 22 1
-----GTGCTAAAGACAAGGAAG morR 18 1

```

>mmu-mir-297a-4

| Sequence                                                                                      | species | len | reads |
|-----------------------------------------------------------------------------------------------|---------|-----|-------|
| ATATGTATGTGTGCATGTGTGTATATGAGTATACATATACATACACACATACCCATACAAGCATGCACACAAATACACGCAAAATCGCCACTC | mirL    | 22  | 96    |
| --ATGTATGTGTGCATGTGCATGT--                                                                    | mirL    | 21  | 24    |
| --ATGTATGTGTGCATGTGCATG--                                                                     | mirL    | 18  | 20    |
| --ATGTATGTGTGCATGTGC--                                                                        | mirL    | 19  | 19    |
| --ATGTATGTGTGCATGTGCAT--                                                                      | mirL    | 20  | 11    |
| --ATGTATGTGTGCATGTGCATGTG--                                                                   | mirL    | 23  | 6     |
| ---TGTATGTGTGCATGTGCATGT---                                                                   | mirL    | 21  | 4     |
| ATATGTATGTGTGCATGTG                                                                           | mirL    | 19  | 2     |
| -TATGTATGTGTGCATGTGCATGT-                                                                     | mirL    | 23  | 2     |
| ---GTATGTGTGCATGTGCATGT---                                                                    | mirL    | 20  | 1     |
| -TATGTATGTGTGCATGTGCAT--                                                                      | mirL    | 21  | 1     |
| ---TGTATGTGTGCATGTGCAT---                                                                     | mirL    | 19  | 1     |
| ---GTATGTGTGCATGTGCATG---                                                                     | mirL    | 19  | 1     |
| -----CACGCAAAATCGCCACTC-----                                                                  | mirR    | 18  | 3     |
| -----TACACGCAAAATCGCCACTC-----                                                                | mirR    | 20  | 1     |
| -----TACACGCAAAATCGCCAC-------                                                                | mirR    | 18  | 1     |

>mmu-mir-1943

| Sequence                                                                                        | species | len | reads |
|-------------------------------------------------------------------------------------------------|---------|-----|-------|
| CCTGGGGAGCCTCTGGCTGGGAAGGGAGGATCTGGGCACCTGGACCAGCTCCTCCCTGCAGGTGCCAGCTCCTCCCTTCCCAGTCACCAGGACCA | morL    | 18  | 2     |
| CCTGGGGAGCCTCTGGCT                                                                              | morL    | 18  | 1     |
| ---GGGGAGCCTCTGGCTGGG---                                                                        | morL    | 19  | 1     |
| ---GGGAGCCTCTGGCTGGGAA---                                                                       | morL    | 19  | 1     |
| ---GGAGCCTCTGGCTGGGAAG---                                                                       | mirL    | 23  | 10    |
| -----AAGGGAGGATCTGGGCACCTGGA-----                                                               | mirL    | 23  | 7     |
| -----AGGGAGGATCTGGGCACCTGGAC-----                                                               | mirL    | 22  | 5     |
| -----AAGGGAGGATCTGGGCACCTGG-----                                                                | mirL    | 25  | 3     |
| -----AAGGGAGGATCTGGGCACCTGGACC-----                                                             | mirL    | 20  | 2     |
| -----AAGGGAGGATCTGGGCACCT-----                                                                  | mirL    | 18  | 2     |
| -----AGGGAGGATCTGGGCACCTGG-----                                                                 | mirL    | 21  | 2     |
| -----GGAAGGGAGGATCTGGGCACCTGGACC-----                                                           | mirL    | 27  | 2     |
| -----AGGGAGGATCTGGGCACCTGGACC-----                                                              | mirL    | 24  | 1     |
| -----AAGGGAGGATCTGGGCACCT-----                                                                  | mirL    | 19  | 1     |
| -----AAGGGAGGATCTGGGCACCTG-----                                                                 | mirL    | 21  | 1     |
| -----AGGGAGGATCTGGGCACCTGGA-----                                                                | mirL    | 22  | 1     |
| -----AGGGAGGATCTGGGCACCT-----                                                                   | mirL    | 18  | 1     |
| -----AGGGAGGATCTGGGCACCTG-----                                                                  | mirL    | 20  | 1     |
| -----GGAAGGGAGGATCTGGGCA-----                                                                   | mirL    | 19  | 1     |
| -----AGGGAGGATCTGGGCACCTGGACCAG-----                                                            | mirL    | 26  | 1     |
| -----ACCAGCTCCTCCCTGCAG-----                                                                    | loop    | 18  | 1     |
| -----GACCAGCTCCTCCCTGCA-----                                                                    | loop    | 18  | 1     |
| -----CAGGTGCCAGCTCCTCCCTTC-----                                                                 | mirR    | 21  | 57    |
| -----CAGGTGCCAGCTCCTCCCTT-----                                                                  | mirR    | 20  | 35    |
| -----CAGGTGCCAGCTCCTCCCTTCC-----                                                                | mirR    | 22  | 23    |

```

-----CAGGTGCCAGCTCCTCCCTTCCC----- mirR 23 10
-----CAGGTGCCAGCTCCTCCCT----- mirR 19 7
-----CAGGTGCCAGCTCCTCC----- mirR 18 3
-----GGTGCCAGCTCCTCCCTTCCC----- mirR 21 1
-----GCAGGTGCCAGCTCCTCCCTTC----- mirR 22 1
-----TCCCAGTCACCAGGACCA morR 18 4
-----TTCCCAGTCACCAGGACC- morR 18 3
-----TTCCCAGTCACCAGGACCA morR 19 1

```

>mmu-mir-297a-6

| Sequence                                                                                                  | species | len | reads |
|-----------------------------------------------------------------------------------------------------------|---------|-----|-------|
| TGTGTGCATTGTGCATGTGCATGTGTGTATGTGCATGAGTGCATGTGCATGCATGTGTGTGCGCATGTATGTGTGCATGTGCATGTATGTGTGCATGTGCATGTG | morL    | 22  | 2     |
| --TGTGCATTGTGCATGTGCATGT                                                                                  | morL    | 20  | 1     |
| TGTGTGCATTGTGCATGTGC                                                                                      | morL    | 19  | 1     |
| ----TGCATTGTGCATGTGCATG                                                                                   | mirL    | 18  | 4     |
| -----GTGTGTATGTGCATGAGT                                                                                   | mirL    | 18  | 1     |
| -----GTGTATGTGCATGAGTGC                                                                                   | mirL    | 18  | 1     |
| -----TGTATGTGCATGAGTGCA                                                                                   | mirL    | 18  | 1     |
| -----ATGTATGTGTGCATGTGCATGT                                                                               | mirR    | 22  | 96    |
| -----ATGTATGTGTGCATGTGCATG--                                                                              | mirR    | 21  | 24    |
| -----ATGTATGTGTGCATGTGC                                                                                   | mirR    | 18  | 20    |
| -----ATGTATGTGTGCATGTGCA---                                                                               | mirR    | 19  | 19    |
| -----ATGTATGTGTGCATGTGCAT---                                                                              | mirR    | 20  | 11    |
| -----ATGTATGTGTGCATGTGCATGTG                                                                              | mirR    | 23  | 6     |
| -----TGTATGTGTGCATGTGCATGT                                                                                | mirR    | 21  | 4     |
| -----GTATGTGTGCATGTGCATG--                                                                                | mirR    | 19  | 1     |
| -----TGTATGTGTGCATGTGCAT---                                                                               | mirR    | 19  | 1     |
| -----GTATGTGTGCATGTGCATGT-                                                                                | mirR    | 20  | 1     |

>mmu-mir-3082

| Sequence                                                                                                       | species | len | reads |
|----------------------------------------------------------------------------------------------------------------|---------|-----|-------|
| GGACAGAGTGTGTGTCTGTGTGGAGACAGGAGTTGCCACACATGGCACTCAACTCTGCAGGATAAATACATGGCAGATATGGATGAGCTCTTCTCTCAGGTGGACGAGAA | mirL    | 21  | 46    |
| ---CAGAGTGTGTGTCTGTGTG                                                                                         | mirL    | 19  | 23    |
| ---CAGAGTGTGTGTCTGTG                                                                                           | mirL    | 22  | 20    |
| -GACAGAGTGTGTGTCTGTGT                                                                                          | mirL    | 20  | 13    |
| ---CAGAGTGTGTGTCTGTGT                                                                                          | mirL    | 23  | 7     |
| GGACAGAGTGTGTGTCTGTGT                                                                                          | mirL    | 24  | 7     |
| -GACAGAGTGTGTGTCTGTGTGG                                                                                        | mirL    | 21  | 5     |
| --ACAGAGTGTGTGTCTGTGT                                                                                          | mirL    | 23  | 4     |
| --ACAGAGTGTGTGTCTGTGTGG                                                                                        | mirL    | 18  | 3     |
| --ACAGAGTGTGTGTCTG                                                                                             | mirL    | 18  | 3     |
| ---CAGAGTGTGTGTCTGT                                                                                            | mirL    | 20  | 3     |
| ---AGAGTGTGTGTCTGTGTG                                                                                          | mirL    | 22  | 3     |
| --ACAGAGTGTGTGTCTGTGTG                                                                                         | mirL    | 23  | 2     |
| ---CAGAGTGTGTGTCTGTGTGA                                                                                        | mirL    | 18  | 2     |
| -GACAGAGTGTGTGTCT                                                                                              | mirL    | 21  | 2     |
| -GACAGAGTGTGTGTCTGTG                                                                                           | mirL    | 19  | 2     |
| ---AGAGTGTGTGTCTGTGT                                                                                           | mirL    | 19  | 2     |

```

-GACAGAGTGTGTGTCTGTGTG----- mirL 23 2
---CAGAGTGTGTGTCTGTGTGG----- mirL 22 2
----GAGTGTGTGTCTGTGT----- mirL 18 1
GGACAGAGTGTGTGTCTGTG----- mirL 20 1
GGACAGAGTGTGTGTCTGTGTGG----- mirL 25 1
----AGAGTGTGTGTCTGTGT----- mirL 18 1
----GAGTGTGTGTCTGTGTGGA----- mirL 21 1
--ACAGAGTGTGTGTCTGTGT----- mirL 20 1
GGACAGAGTGTGTGTGTC----- mirL 18 1
GGACAGAGTGTGTGTGTCT----- mirL 19 1
GGACAGAGTGTGTGTCTGTG----- mirL 22 1
-GACAGAGTGTGTGTCTGT----- mirL 20 1
GGACAGAGTGTGTGTCTGTGT----- mirL 24 1
--ACAGAGTGTGTGTCTGT----- mirL 19 1
-----CAGATATGGATGAGCTCT----- mirR 18 18
-----TGCCAGATATGGATGAGCTCT----- mirR 21 4
-----GCAGATATGGATGAGCTCTTCTC----- mirR 23 1
-----GCAGATATGGATGAGCTCT----- mirR 19 1
-----AGATATGGATGAGCTCTT----- mirR 18 1
-----TCTTCTCTCAGGTGGACGAGAA morR 22 1
-----TCTTCTCTCAGGTGGACGAG-- morR 20 1
-----TCTTCTCTCAGGTGGACGAGA- morR 21 1

```

>mmu-mir-3470a

```

AGAGCCCTGGCTGTCCTGGACTCACTTTGTAGACCAGGCTGGCCTTAAATTCACAGAGATCAGCCTGCCTCTGCCTCCTGAGTGTGGGATTAAGGCATGGTAACCAC species len reads
---GCCCTGGCTGTCCTGGAC----- morL 18 6
--AGCCCTGGCTGTCCTGGAC----- morL 19 4
AGAGCCCTGGCTGTCCTGGAC----- morL 21 1
--AGCCCTGGCTGTCCTGGACT----- morL 20 1
--AGCCCTGGCTGTCCTGGA----- morL 18 1
-----ACTCACTTTGTAGACCAGGCT----- mirL 21 12
-----ACTCACTTTGTAGACCAGG----- mirL 19 11
-----CTCACTTTGTAGACCAGG----- mirL 18 8
-----ACTCACTTTGTAGACCAGGC----- mirL 20 6
-----CTCACTTTGTAGACCAGGC----- mirL 19 6
-----ACTCACTTTGTAGACCAGGCTGGCCT----- mirL 26 5
-----CTCACTTTGTAGACCAGGCTGGCC----- mirL 24 3
-----CTCACTTTGTAGACCAGGCT----- mirL 20 2
-----ACTCACTTTGTAGACCAG----- mirL 18 2
-----GACTCACTTTGTAGACCA----- mirL 18 2
-----GGACTCACTTTGTAGACC----- mirL 18 2
-----CTCACTTTGTAGACCAGGCTGGC----- mirL 23 1
-----TGGACTCACTTTGTAGAC----- mirL 18 1
-----ACTCACTTTGTAGACCAGGCTGGCC----- mirL 25 1
-----GGACTCACTTTGTAGACCAGG----- mirL 21 1
-----GACTCACTTTGTAGACCAG----- mirL 19 1

```

C:\Documents and Settings\hong\Desktop\Hippocampus-total RNA.txt

```
-----ACTCACTTTGTAGACCAGGCTGGCCTTA----- mirL 28 1
-----CTCACTTTGTAGACCAGGCTGGCCT----- mirL 25 1
-----TGGACTCACTTTGTAGACC----- mirL 19 1
-----CCTTAAATTCACAGAGATC----- loop 19 1
-----GCCTTAAATTCACAGAGATC----- loop 20 1
-----CTGGCCTTAAATTCACAGAGATC----- loop 23 1
-----GCCTGCCTCTGCCTCCTG----- mirR 18 30
-----GCCTGCCTCTGCCTCCTGAG----- mirR 20 13
-----TCAGCCTGCCTCTGCCTCC----- mirR 19 6
-----GCCTGCCTCTGCCTCCTGA----- mirR 19 5
-----TCAGCCTGCCTCTGCCTC----- mirR 18 4
-----CTGCCTCTGCCTCCTGAG----- mirR 18 3
-----GCCTGCCTCTGCCTCCTGAGT----- mirR 21 3
-----GCCTGCCTCTGCCTCCTGAGTGGGA----- mirR 28 3
-----TCAGCCTGCCTCTGCCTCCTGA----- mirR 22 3
-----TCAGCCTGCCTCTGCCTCCTGAG----- mirR 23 3
-----CCTGCCTCTGCCTCCTGA----- mirR 18 2
-----TCAGCCTGCCTCTGCCTCCT----- mirR 20 1
-----GCCTGCCTCTGCCTCCTGAGTGGGATTA----- mirR 31 1
-----TGCCTCTGCCTCCTGAGTGT----- mirR 21 1
-----GCCTGCCTCTGCCTCCTGAGTGC----- mirR 23 1
-----TGCCTCTGCCTCCTGAGTGGGATTA----- mirR 29 1
-----TGCCTCTGCCTCCTGAGTGT----- mirR 19 1
-----AGCCTGCCTCTGCCTCCTG----- mirR 19 1
-----AGCCTGCCTCTGCCTCCTGAGT----- mirR 22 1
-----CCTGCCTCTGCCTCCTGAGT----- mirR 20 1
-----CCTGCCTCTGCCTCCTGAGTGC----- mirR 22 1
-----TGCCTCTGCCTCCTGAGTGGGA----- mirR 25 1
-----TGCCTCTGCCTCCTGAGT----- mirR 18 1
-----GCTGGGATTAAGGCATGGTAACCAC----- morR 26 2
-----CTGAGTGTGGGATTAAG----- morR 19 2
-----GAGTGTGGGATTAAGGCATG----- morR 22 1
-----GCTGGGATTAAGGCATGGTA----- morR 21 1
-----TGAGTGTGGGATTAAGGC----- morR 20 1
-----GCTGGGATTAAGGCATGGTAACC----- morR 24 1
-----CTGAGTGTGGGATTAAGGC----- morR 21 1
-----GCTGGGATTAAGGCATGGT----- morR 20 1
-----TGAGTGTGGGATTAAG----- morR 18 1
-----TGAGTGTGGGATTAAGGCAT----- morR 22 1
-----TGCTGGGATTAAGGCATGGTA----- morR 22 1
-----AGTGCTGGGATTAAGGCATGGTAA----- morR 25 1
-----GCTGGGATTAAGGCATGGTAACCA----- morR 25 1
```

```
>mmu-mir-466d
CATATACATACACGCACACATAGATACGCACGCACACACACACAGG species len reads
--TATACATACACGCACACATAG----- mirR 21 53
```

```

---ATACATACACGCACACATAG----- mirR 20 30
--TATACATACACGCACACATAGA----- mirR 22 24
---ATACATACACGCACACATAGA----- mirR 21 22
----ACATACACGCACACATAG----- mirR 18 17
----TACATACACGCACACATAGA----- mirR 20 6
----TACATACACGCACACATAG----- mirR 19 4
---ATACATACACGCACACATAGAT----- mirR 22 4
----ACATACACGCACACATAGA----- mirR 19 3
---ATACATACACGCACACATAGATA----- mirR 24 2
---ATACATACACGCACACATAGATA----- mirR 23 2
----TACATACACGCACACATAGAT----- mirR 21 1
CATATACATACACGCACACATAG----- mirR 23 1
--TATACATACACGCACACATAGAT----- mirR 23 1
-ATATACATACACGCACACATAG----- mirR 22 1
-----TACGCACGCACACACACACAG- morR 23 5
-----CGCACGCACACACACACAG- morR 21 2
-----TACGCACGCACACACACACAGG morR 24 2
-----TAGATACGCACGCACACAC- morR 19 1
-----GATACGCACGCACACACA- morR 18 1
-----ACGCACGCACACACACACAG- morR 22 1

```

>mmu-mir-669j

```

AGAGTTCAGCATGCGATTTCATGTGATGTCCACCAAGAATGTGCATGTGTGTATAGTTGTGTACATATTCACCTTTTGTATATGAATATGCATATACTCACATGCAAACATACTCCCACGAATGGCCC species len
AGAGTTCAGCATGCGATT----- morL 18 1
-----ATTCATGTGATGTCCACCA----- mirL 19 2
-----ATTCATGTGATGTCCACC----- mirL 18 2
-----ATTCATGTGATGTCCACAA----- mirL 20 1
-----TTCATGTGATGTCCACCA----- mirL 18 1
-----TGCATATACTCACATGCAAACA----- mirR 22 52
-----TGCATATACTCACATGCAAAC----- mirR 21 48
-----GCATATACTCACATGCAAACA----- mirR 21 13
-----TGCATATACTCACATGCAAACAT----- mirR 23 12
-----GCATATACTCACATGCAAAC----- mirR 20 8
-----ATATACTCATGCAAACA----- mirR 19 8
-----TGCATATACTCACATGCAA----- mirR 19 6
-----CATATACTCACATGCAAACA----- mirR 20 5
-----TGCATATACTCACATGCAAA----- mirR 20 4
-----ATATACTCATGCAAAC----- mirR 18 4
-----TGCATATACTCACATGCA----- mirR 18 4
-----GCATATACTCACATGCAAACAT----- mirR 22 2
-----CATATACTCACATGCAAAC----- mirR 19 1
-----CATATACTCATGCAAA----- mirR 18 1
-----TGCATATACTCACATGCAAACATA----- mirR 24 1
-----ATATACTCACATGCAAACAT----- mirR 20 1
-----ATATACTCACATGCAAACATA----- mirR 21 1
-----TACTCCCACGAATGGCCC morR 18 1

```



```

-----ATACTCCCACGAATGGCC- morR 18 1

>mmu-mir-466m
TATGTATGTCCTGTGTGTCTTGTGTGTGCATGTGCATGTGTGTATATGAATATACATATACATACACACATACACACGCACGTACACACACAAAACACACAC species len reads
-----ATGTGCCTGTGTGTGTT----- morL 18 3
TATGTATGTCCTGTGTGT----- morL 19 2
--TGTATGTCCTGTGTGT----- morL 18 1
TATGTATGTCCTGTGTGT----- morL 22 1
---GTATGTCCTGTGTGT----- morL 18 1
-ATGTATGTCCTGTGTGT----- morL 20 1
-----TCTTGTGTGTGCATGTGCATGT----- mirL 22 9
-----CTTGTGTGTGCATGTGCATGT----- mirL 22 1
-----TCTTGTGTGTGCATGTGCATGT----- mirL 24 1
-----CTTGTGTGTGCATGTGCAT----- mirL 19 1
-----TCTTGTGTGTGCATGTGC----- mirL 18 1
-----TCTTGTGTGTGCATGTGCAT----- mirL 20 1
-----GTTCTTGTGTGTGCATGTGCAT----- mirL 22 1
-----ATATACATACACACATACACAC----- mirR 22 13
-----TACATACACACATACACACGCAC----- mirR 23 11
-----TATACATACACACATACACAC----- mirR 21 9
-----TACATACACACATACACACGCA----- mirR 22 9
-----TATACATACACACATACACACG----- mirR 22 8
-----TACATACACACATACACACGC----- mirR 21 8
-----TACATACACACATACACAC----- mirR 19 7
-----ATATACATACACACATACACA----- mirR 21 6
-----ATATACATACACACATACAC----- mirR 20 6
-----ATACATACACACATACACAC----- mirR 20 6
-----TATACATACACACATACACA----- mirR 20 6
-----ATATACATACACACATACACG----- mirR 23 5
-----TATACATACACACATACAC----- mirR 19 4
-----TACATACACACATACACACG----- mirR 20 4
-----TACATACACACATACACA----- mirR 18 3
-----ATATACATACACACATACA----- mirR 19 3
-----ATACATACACACATACACA----- mirR 19 3
-----TATACATACACACATACA----- mirR 18 3
-----CATATACATACACACATACACA----- mirR 22 2
-----ATACATACACACATACAC----- mirR 18 2
-----TATACATACACACATACACACG----- mirR 23 1
-----TACATATACATACACACATACAC----- mirR 23 1
-----ATACATACACACATACACG----- mirR 21 1
-----ACATATACATACACACATACAC----- mirR 22 1
-----ATACATACACACATACACG----- mirR 22 1
-----CGTACACACACACAAAACACA----- morR 20 8
-----CGTACACACACACAAAACAC----- morR 19 6
-----GCACGTACACACACACAAA----- morR 18 3
-----CGTACACACACACAAAACACAC----- morR 23 2

```

```

-----GCACGTACACACACACAAAAC----- morR 20 2
-----ACGTACACACACACAAAACAC----- morR 20 2
-----CACGCACGTACACACACACA----- morR 20 2
-----ACGCACGTACACACACACAAA----- morR 21 1
-----CGTACACACACACAAAACA----- morR 18 1
-----CGCACGTACACACACACAAA----- morR 20 1
-----CACGTACACACACACAAA----- morR 18 1
-----ACGTACACACACACAAAAC----- morR 18 1
-----CGCACGTACACACACACAAAAC----- morR 21 1
-----ACGCACGTACACACACACAAA----- morR 20 1
-----CACGTACACACACACAAAACA----- morR 20 1

```

>mmu-mir-467f

```

CTGTACCCAGAAATCGAACGGGGTGGGTGTGTGTGTAGGTGTGTGTGTGTGTATGTATATACACACACACCTACACACAGCTTTTTGGAATTTT species len reads
CTGTACCCAGAAATCGAA----- morL 18 1
-----CGGGGGTGGGTGTGTGTGT----- mirL 19 4
-----ACGGGGTGGGTGTGTGT----- mirL 18 2
-----GGGGGTGGGTGTGTGT----- mirL 18 1
-----GGGTGGGTGTGTGTGTAGGT----- mirL 20 1
-----GTGTGTGTGTGTGTATGTATG----- loop 21 1
-----ATATACACACACACCTACA----- mirR 21 44
-----TATACACACACACCTACA----- mirR 20 34
-----ATATACACACACACCTACAC----- mirR 22 18
-----ATACACACACACCTACACACA----- mirR 23 9
-----ATATACACACACACCTA----- mirR 19 9
-----ATATACACACACACCTAC----- mirR 20 9
-----TATACACACACACCTACAC----- mirR 21 8
-----ATACACACACACCTACAC----- mirR 20 5
-----TATACACACACACCTACAC----- mirR 23 5
-----TATACACACACACCTAC----- mirR 19 4
-----ATATACACACACACCT----- mirR 18 3
-----ATACACACACACCTACA----- mirR 19 2
-----ATATACACACACACCTACACA----- mirR 23 2
-----ATATACACACACACCTACAC----- mirR 24 2
-----ATACACACACACCTACACA----- mirR 21 2
-----TATATACACACACACCTA----- mirR 20 1
-----TACACACACACCTACACAC----- mirR 21 1
-----TACACACACACCTACACACA----- mirR 22 1
-----TACACACACACCTACAC----- mirR 19 1
-----TATACACACACACCTA----- mirR 18 1
-----TATACACACACACCTACACA----- mirR 22 1
-----TATATACACACACACCT----- mirR 19 1
-----TACACACACACCTACACA----- mirR 20 1
-----ATACACACACACCTACACAC----- mirR 22 1
-----ACACACAGCTTTTTGGA----- morR 18 2
-----AGCTTTTTGGAATTTT----- morR 18 1

```

>mmu-mir-3104

```

ACTAGGGGGCAGGAGCCGGAGCCCTCTGCTGAACTGACAGACGCTCTGCTTTGCTCCCCCAGATCTCGATCCATCAGTGGTGCCTC species len reads
--TAGGGGGCAGGAGCCGGAGCCCTC----- mirL 24 3
--TAGGGGGCAGGAGCCGGAGCCCT----- mirL 23 2
ACTAGGGGGCAGGAGCCG----- mirL 18 1
--TAGGGGGCAGGAGCCGGAGCC----- mirL 21 1
---AGGGGGCAGGAGCCGGAGC----- mirL 19 1
-----CTCTGCTGAACTGACAGACG----- loop 20 1
-----CTGCTGAACTGACAGACG----- loop 18 1
-----ACGCTCTGCTTTGCTCCCCCAG----- mirR 22 32
-----ACGCTCTGCTTTGCTCCCCCAGA----- mirR 23 26
-----ACGCTCTGCTTTGCTCCCC----- mirR 20 20
-----ACGCTCTGCTTTGCTCCCC----- mirR 18 17
-----ACGCTCTGCTTTGCTCCCCCA----- mirR 21 16
-----ACGCTCTGCTTTGCTCCCCCAGAT----- mirR 25 10
-----GACGCTCTGCTTTGCTCCCCCA----- mirR 22 7
-----ACGCTCTGCTTTGCTCCCC----- mirR 19 6
-----GACGCTCTGCTTTGCTCCCCCAGAT----- mirR 25 5
-----GACGCTCTGCTTTGCTCCCC----- mirR 21 4
-----GACGCTCTGCTTTGCTCCCCCAG----- mirR 23 4
-----CTCTGCTTTGCTCCCCCA----- mirR 18 3
-----GACGCTCTGCTTTGCTCCC----- mirR 19 2
-----CGCTCTGCTTTGCTCCCCCAG----- mirR 21 1
-----GCTCTGCTTTGCTCCCC----- mirR 18 1
-----GACGCTCTGCTTTGCTCCCC----- mirR 20 1
-----CGCTCTGCTTTGCTCCCC----- mirR 18 1
-----CGCTCTGCTTTGCTCCCCCAGA----- mirR 22 1
-----GACGCTCTGCTTTGCTCCCCCAGA----- mirR 24 1
-----CGCTCTGCTTTGCTCCCCCAGAT----- mirR 23 1
-----CTCGATCCATCAGTGGTGC----- morR 19 1
-----TCGATCCATCAGTGGTGCCTC morR 21 1

```

>mmu-mir-1906-1

```

ACATTAGGAGCAACCTCCTAGGGTTGTTGTGAGAATTAATGAACTGCAGCAGCCTGAGGCAGGGCTGGGCAGAGACCTCAGCACATGTTTGTGAAAGGTTTGCAGGTGGATCT species len reads
-CATTAGGAGCAACCTCCT----- morL 18 2
--ATTAGGAGCAACCTCCTAG----- morL 19 1
ACATTAGGAGCAACCTCCT----- morL 19 1
-----AGGGTTGTTGTGAGAATT----- mirL 18 2
-----CCTAGGGTTGTTGTGAGA----- mirL 18 1
-----AAAGGTTTGCAGGTGGAT----- mirR 18 132
-----AAAGGTTTGCAGGTGGATC----- mirR 19 18
-----AAAGGTTTGCAGGTGGATCT----- mirR 20 6
-----GAAAGGTTTGCAGGTGGA----- mirR 18 1

```

>mmu-mir-466h

| CCATGTGTGTATATTTGTGTGTGCATGTGCTTGTGTGTATGTGAATATATATATATCATACGCACGCACACACACACACAAATGCAAGCACATACACTCTCACACACA | species | len | reads |
|--------------------------------------------------------------------------------------------------------------|---------|-----|-------|
| CCATGTGTGTATATTTGT                                                                                           | morL    | 18  | 1     |
| -----TGTGTGCATGTGCTTGTGTGT-----                                                                              | mirL    | 21  | 77    |
| -----TGTGTGCATGTGCTTGTGT-----                                                                                | mirL    | 19  | 9     |
| -----GTGTGCATGTGCTTGTGTGT-----                                                                               | mirL    | 20  | 9     |
| -----GTGCATGTGCTTGTGTGT-----                                                                                 | mirL    | 18  | 9     |
| -----TGTGTGCATGTGCTTGTGTG-----                                                                               | mirL    | 20  | 7     |
| -----TGTGTGCATGTGCTTGTGTGTA-----                                                                             | mirL    | 22  | 4     |
| -----TGTGTGCATGTGCTTGTG-----                                                                                 | mirL    | 18  | 4     |
| -----TGTGCATGTGCTTGTGTGT-----                                                                                | mirL    | 19  | 3     |
| -----GTGCATGTGCTTGTGTGTA-----                                                                                | mirL    | 19  | 3     |
| -----GTGTGTGCATGTGCTTGTGTGT-----                                                                             | mirL    | 22  | 3     |
| -----TTGTGTGTGCATGTGCTTG-----                                                                                | mirL    | 19  | 2     |
| -----TGTGCATGTGCTTGTGTGTA-----                                                                               | mirL    | 20  | 2     |
| -----GTGTGCATGTGCTTGTGTG-----                                                                                | mirL    | 19  | 2     |
| -----TGTGTGCATGTGCTTGTGTGTATGT-----                                                                          | mirL    | 25  | 1     |
| -----TTGTGTGTGCATGTGCTTGT-----                                                                               | mirL    | 20  | 1     |
| -----GTGCATGTGCTTGTGTGTAT-----                                                                               | mirL    | 20  | 1     |
| -----TGTGTGCATGTGCTTGTGTGTAT-----                                                                            | mirL    | 23  | 1     |
| -----GTGTGTGCATGTGCTTGTGTGTA-----                                                                            | mirL    | 23  | 1     |
| -----GTGTGTGCATGTGCTTGTGTG-----                                                                              | mirL    | 21  | 1     |
| -----TGTGTGTGCATGTGCTTGTGTGT-----                                                                            | mirL    | 23  | 1     |
| -----TACGCACGCACACACACACACAAAT-----                                                                          | mirR    | 25  | 4     |
| -----CATACGCACGCACACACACACAC-----                                                                            | mirR    | 18  | 4     |
| -----CATACGCACGCACACACACACAC-----                                                                            | mirR    | 20  | 2     |
| -----CATACGCACGCACACACACACAC-----                                                                            | mirR    | 22  | 1     |
| -----CATACGCACGCACACACACAC-----                                                                              | mirR    | 19  | 1     |
| -----TACGCACGCACACACACACACAA-----                                                                            | mirR    | 23  | 1     |
| -----CATACGCACGCACACACACAC-----                                                                              | mirR    | 21  | 1     |
| -----TGCAAGCACATACACTCT-----                                                                                 | morR    | 18  | 1     |
| -----CAAGCACATACACTCTCAC-----                                                                                | morR    | 19  | 1     |
| -----AGCACATACACTCTCACACACA-----                                                                             | morR    | 22  | 1     |
| -----ATGCAAGCACATACACTCTCA-----                                                                              | morR    | 21  | 1     |
| -----AATGCAAGCACATACACT-----                                                                                 | morR    | 18  | 1     |
| -----GCAAGCACATACACTCTCA-----                                                                                | morR    | 19  | 1     |
| -----CAAGCACATACACTCTCA-----                                                                                 | morR    | 18  | 1     |
| -----AGCACATACACTCTCACACA-----                                                                               | morR    | 20  | 1     |

>mmu-mir-297c

| TATATGTATGTGTGCATGTGTGTATATGAATATACATATACATACACACATACCCATACAAACATGCATACAAACACACAAAAATTGGCACTCATCCATCTATTTGAA | species | len | reads |
|--------------------------------------------------------------------------------------------------------------|---------|-----|-------|
| ---ATGTATGTGTGCATGTACATGT---                                                                                 | mirL    | 22  | 50    |
| ---ATGTATGTGTGCATGTAC---                                                                                     | mirL    | 18  | 17    |
| ---ATGTATGTGTGCATGTACA---                                                                                    | mirL    | 19  | 12    |
| ---ATGTATGTGTGCATGTACATGT---                                                                                 | mirL    | 23  | 9     |
| ---ATGTATGTGTGCATGTACATG---                                                                                  | mirL    | 21  | 9     |
| ---GTATGTGTGCATGTACATGT---                                                                                   | mirL    | 20  | 8     |

```

-----GTATGTGTGCATGTACATG----- mirL 19 6
-----GTATGTGTGCATGTACATGTG----- mirL 21 5
---ATGTATGTGTGCATGTACAT----- mirL 20 4
-----TATGTGTGCATGTACATGT----- mirL 19 4
-----TGTATGTGTGCATGTACATG----- mirL 20 4
-----TGTATGTGTGCATGTACATGT----- mirL 21 3
--TATGTATGTGTGCATGTACAT----- mirL 21 3
---ATGTATGTGTGCATGTACATGTGTG----- mirL 25 2
--TATGTATGTGTGCATGTACATGT----- mirL 23 2
-----GTATGTGTGCATGTACAT----- mirL 18 2
-ATATGTATGTGTGCATGTA----- mirL 19 1
TATATGTATGTGTGCATGTACA----- mirL 22 1
----TGTATGTGTGCATGTACA----- mirL 18 1
----TGTATGTGTGCATGTACAT----- mirL 19 1
-----CACTCATCCATCTATTTG-- mirR 18 2
-----ACTCATCCATCTATTTGA- mirR 18 1
-----CTCATCCATCTATTTGAA mirR 18 1
-----TGGCACTCATCCATCTAT----- mirR 18 1

```

>mmu-mir-3084

| sequence                                      | species | len | reads |
|-----------------------------------------------|---------|-----|-------|
| AGTTGAAGGTTAATTAGCAGAGTAACTGAATATAGTAATTCTGCC | mirR    | 22  | 42    |
| -GTTGAAGGTTAATTAGCAGAGT-----                  | mirR    | 21  | 23    |
| -GTTGAAGGTTAATTAGCAGAG-----                   | mirR    | 23  | 19    |
| --TTGAAGGTTAATTAGCAGAGTAA-----                | mirR    | 23  | 16    |
| -GTTGAAGGTTAATTAGCAGAGTA-----                 | mirR    | 21  | 9     |
| --TTGAAGGTTAATTAGCAGAGT-----                  | mirR    | 22  | 8     |
| -GTTGAAGGTTAATTAGCAGAGTAA-----                | mirR    | 24  | 5     |
| -GTTGAAGGTTAATTAGCAGA-----                    | mirR    | 20  | 4     |
| ---TGAAGGTTAATTAGCAGAGTA-----                 | mirR    | 21  | 3     |
| --TTGAAGGTTAATTAGCAGAG-----                   | mirR    | 20  | 3     |
| AGTTGAAGGTTAATTAGCAGAGTA-----                 | mirR    | 24  | 3     |
| --TTGAAGGTTAATTAGCAGAGTAAC-----               | mirR    | 24  | 2     |
| AGTTGAAGGTTAATTAGCAGAG-----                   | mirR    | 22  | 1     |
| AGTTGAAGGTTAATTAGCAGAGT-----                  | mirR    | 23  | 1     |
| ---TGAAGGTTAATTAGCAGAGTAAC-----               | mirR    | 23  | 1     |
| AGTTGAAGGTTAATTAGCAGA-----                    | mirR    | 21  | 1     |
| -GTTGAAGGTTAATTAGCAGAGTAAC-----               | mirR    | 25  | 1     |
| -----CTGAATATAGTAATTCTGCC                     | morR    | 20  | 1     |

>mmu-mir-467d

| sequence                  | species | len | reads |
|---------------------------|---------|-----|-------|
| ATAAGTGCGCGCATGTATATGCGTG | mirL    | 19  | 47    |
| -TAAGTGCGCGCATGTATAT----- | mirL    | 21  | 20    |
| -TAAGTGCGCGCATGTATATGC--- | mirL    | 20  | 20    |
| ATAAGTGCGCGCATGTATAT----- | mirL    | 18  | 13    |

ATAAGTGC GCGCATGTATATGC--- mirL 22 12  
-TAAGTGC GCGCATGTATATG---- mirL 20 8  
-TAAGTGC GCGCATGTATATGCGTG mirL 24 5  
ATAAGTGC GCGCATGTAT----- mirL 18 4  
ATAAGTGC GCGCATGTATATG---- mirL 21 3  
ATAAGTGC GCGCATGTATATGCG-- mirL 23 2  
--AAGTGC GCGCATGTATATG---- mirL 19 2  
-TAAGTGC GCGCATGTATATGCG-- mirL 22 1  
ATAAGTGC GCGCATGTATA----- mirL 19 1  
--AAGTGC GCGCATGTATATGCGT- mirL 22 1  
---AGTGC GCGCATGTATATGC--- mirL 19 1  
-TAAGTGC GCGCATGTATATGCGT- mirL 23 1  
---AGTGC GCGCATGTATATG---- mirL 18 1  
--AAGTGC GCGCATGTATAT----- mirL 18 1

>mmu-mir-3070b

| ACCTTGAACCTGGGATCCTCCCATGATCTTCTGGTGCTATGGTCAGGGGTAGATTC | species | len | reads |
|----------------------------------------------------------|---------|-----|-------|
| -----CCTTGAACCTGGGATCCTCC-----                           | mirL    | 20  | 3     |
| -----CTTGAACCTGGGATCCTC-----                             | mirL    | 18  | 1     |
| -----ACCTTGAACCTGGGATCCTC-----                           | mirL    | 20  | 1     |
| -----TGCTGCTATGGTCAGGGGTAG---                            | mirR    | 21  | 84    |
| -----TGCTGCTATGGTCAGGGGTAGA---                           | mirR    | 22  | 15    |
| -----TGCTGCTATGGTCAGGGGTAGAT--                           | mirR    | 23  | 6     |
| -----CTGCTGCTATGGTCAGGGGTAG---                           | mirR    | 22  | 5     |
| -----TGCTGCTATGGTCAGGGGT-----                            | mirR    | 19  | 5     |
| -----TGCTGCTATGGTCAGGGG-----                             | mirR    | 18  | 3     |
| -----GGTCTATGGTCAGGGGTAG---                              | mirR    | 20  | 3     |
| -----TGCTGCTATGGTCAGGGGTAGATTC                           | mirR    | 25  | 2     |
| -----TGCTGCTATGGTCAGGGGTA----                            | mirR    | 20  | 2     |
| -----GGTCTATGGTCAGGGGT-----                              | mirR    | 18  | 2     |
| -----CTGCTGCTATGGTCAGGGGTAGA---                          | mirR    | 23  | 1     |
| -----TCTGCTGCTATGGTCAGGGGT-----                          | mirR    | 21  | 1     |
| -----GGTCTATGGTCAGGGGTAGA---                             | mirR    | 21  | 1     |
| -----TTCTGGTGCTATGGTCAGG-----                            | mirR    | 19  | 1     |

>mmu-mir-465a

| GCTTTGTATGCAGTGCCCTATTTAGAATGGCACTGATGTGATAAAAATAAAAAATTGATCAGGGCCTTTCTAAGTAGAGTAAGGCTTACCACCTTCTACGTTTAACTTGTAGATGGATATTCAGATTAGCTGTAG | spe |
|-----------------------------------------------------------------------------------------------------------------------------------------|-----|
| -----GCTTTGTATGCAGTGCCC-----                                                                                                            | mor |
| -----TATTTAGAATGGCACTGA-----                                                                                                            | mir |
| -----TATTTAGAATGGCACTGAT-----                                                                                                           | mir |
| -----TATTTAGAATGGCACTGATG-----                                                                                                          | mir |
| -----TATTTAGAATGGCACTGATGT-----                                                                                                         | mir |
| -----TATTTAGAATGGCACTGATGTGA-----                                                                                                       | mir |
| -----ATTTAGAATGGCACTGATG-----                                                                                                           | mir |
| -----TATTTAGAATGGCACTGATGTG-----                                                                                                        | mir |
| -----TATTTAGAATGGCACTGATGTGATA-----                                                                                                     | mir |

```
-----ATTTAGAATGGCACTGAT----- mir
-----ATTTAGAATGGCACTGATGT----- mir
-----TATTCAGATTAGCTGTAG----- mir
-----ATATTCAGATTAGCTGTAG----- mir
```

>mmu-mir-3058

| Sequence                                                                                             | species | len | reads |
|------------------------------------------------------------------------------------------------------|---------|-----|-------|
| TCTCCAGCGTTGGAGTCAGCCACGGCTTACCTGGAAGATTGAATGTCTACTTGGCTTTCTTCTCTGTCAGCCGTGGGTGCCTCTTGCTACTGGAAGAGCT | morL    | 18  | 1     |
| TCTCCAGCGTTGGAGTCA                                                                                   | mirL    | 23  | 43    |
| -----TCAGCCACGGCTTACCTGGAAGA-----                                                                    | mirL    | 21  | 27    |
| -----TCAGCCACGGCTTACCTGGAA-----                                                                      | mirL    | 22  | 11    |
| -----TCAGCCACGGCTTACCTGGAAG-----                                                                     | mirL    | 22  | 8     |
| -----CAGCCACGGCTTACCTGGAAGA-----                                                                     | mirL    | 20  | 5     |
| -----TCAGCCACGGCTTACCTGGA-----                                                                       | mirL    | 19  | 4     |
| -----TCAGCCACGGCTTACCTGG-----                                                                        | mirL    | 24  | 1     |
| -----TCAGCCACGGCTTACCTGGAAGAT-----                                                                   | mirL    | 21  | 1     |
| -----CAGCCACGGCTTACCTGGAAG-----                                                                      | loop    | 18  | 1     |
| -----GAATGTCTACTTGGCTTT-----                                                                         | mirR    | 23  | 10    |
| -----TTCTGTGTCAGCCGTGGGTGCCTC-----                                                                   | mirR    | 21  | 5     |
| -----TTCTGTGTCAGCCGTGGGTGCC-----                                                                     | mirR    | 22  | 5     |
| -----TTCTGTGTCAGCCGTGGGTGCCT-----                                                                    | mirR    | 20  | 3     |
| -----TTCTGTGTCAGCCGTGGGTGC-----                                                                      | mirR    | 20  | 1     |
| -----TCCTGTGTCAGCCGTGGGTGCC-----                                                                     | mirR    | 22  | 1     |
| -----TCCTGTGTCAGCCGTGGGTGCCTC-----                                                                   | mirR    | 24  | 1     |
| -----TTCTTCTGTGTCAGCCGTGGG-----                                                                      | mirR    | 20  | 1     |
| -----TTCTTCTGTGTCAGCCGTG-----                                                                        | mirR    | 18  | 1     |
| -----TCCTGTGTCAGCCGTGGGTGCCT-----                                                                    | mirR    | 21  | 1     |
| -----TCTTCTGTGTCAGCCGTGG-----                                                                        | mirR    | 18  | 1     |
| -----TTCTTCTGTGTCAGCCGTGG-----                                                                       | mirR    | 19  | 1     |
| -----TTCTTCTGTGTCAGCCGTGGT-----                                                                      | mirR    | 18  | 1     |
| -----TCTTGCTACTGGAAGAGCT-----                                                                        | morR    | 19  | 1     |
| -----CTCTTGCTACTGGAAGAG-----                                                                         | morR    | 18  | 1     |

>mmu-mir-1906-2

| Sequence                                                                                               | species | len | reads |
|--------------------------------------------------------------------------------------------------------|---------|-----|-------|
| ACATTAGGAGCAACCTCCTTAGGGTTGTTGTGAGAATTAATGAACTGCAGCAGCCTGAGGCAGGGCTGGGCAGAGACCTCAAAAAAAAAAAAAAAAAAAAAA | morL    | 18  | 2     |
| -----CATTAGGAGCAACCTCCT-----                                                                           | morL    | 19  | 1     |
| -----ATTAGGAGCAACCTCCTAG-----                                                                          | morL    | 19  | 1     |
| ACATTAGGAGCAACCTCCT                                                                                    | mirL    | 18  | 2     |
| -----AGGGTTGTTGTGAGAATT-----                                                                           | mirL    | 18  | 1     |
| -----CCTAGGGTTGTTGTGAGA-----                                                                           | mirL    | 18  | 1     |
| -----TGCAGCAGCCTGAGGCAGGGCT-----                                                                       | mirR    | 22  | 58    |
| -----TGCAGCAGCCTGAGGCAGGGCTG-----                                                                      | mirR    | 23  | 18    |
| -----TGCAGCAGCCTGAGGCAGGGC-----                                                                        | mirR    | 21  | 10    |
| -----TGCAGCAGCCTGAGGCAG-----                                                                           | mirR    | 18  | 9     |
| -----TGCAGCAGCCTGAGGCAGG-----                                                                          | mirR    | 19  | 7     |
| -----GCAGCAGCCTGAGGCAGGGCT-----                                                                        | mirR    | 21  | 4     |

```

-----TGCAGCAGCCTGAGGCAGGGCTGGGC----- mirR 26 3
-----AGCAGCCTGAGGCAGGGCT----- mirR 19 3
-----GCAGCAGCCTGAGGCAGGGC----- mirR 20 2
-----TGCAGCAGCCTGAGGCAGGGCTGG----- mirR 24 2
-----AACTGCAGCAGCCTGAGGCAGGGCTGG----- mirR 27 1
-----CAGCAGCCTGAGGCAGGGCT----- mirR 20 1
-----ACTGCAGCAGCCTGAGGCA----- mirR 19 1
-----CAGAGACCTCAAAAAAAAA----- morR 18 2
-----GGCAGAGACCTCAAAAAAAAA----- morR 19 1
-----CTGGGCAGAGACCTCAAA----- morR 18 1
-----GGGCAGAGACCTCAAAAAAAAA----- morR 20 1
-----GCAGAGACCTCAAAAAAAAA----- morR 18 1
-----GGGCAGAGACCTCAAAAA----- morR 18 1
-----GGGCAGAGACCTCAAAAAAAAAAAAAAAAAAAAAA morR 35 1
-----GCAGAGACCTCAAAAAAAAAAAAAAAAA----- morR 25 1

```

>mmu-mir-3101

```

GCAGGTGGGGTAGGTAGCAGGTACCATTGACTAAAGCTAGTACTATAGGCTTGCCTCTAGCTTTGGTGGATGGTCTTTGCTAAGTTCTCTGCCAACCCAGCA species len reads
GCAGGTGGGGTAGGTAGC----- morL 18 1
-----GGTACCATTGACTAAAGCTAG----- mirL 21 61
-----GGTACCATTGACTAAAGCTAGT----- mirL 22 17
-----GGTACCATTGACTAAAGCTA----- mirL 20 16
-----GGTACCATTGACTAAAGCT----- mirL 19 10
-----GCAGGTACCATTGACTAA----- mirL 18 2
-----AGGTACCATTGACTAAAGCTAG----- mirL 22 2
-----GGTACCATTGACTAAAGCTAGTAC----- mirL 24 1
-----AGGTACCATTGACTAAAG----- mirL 18 1
-----GGTACCATTGACTAAAGCTAGTA----- mirL 23 1
-----GGTACCATTGACTAAAGC----- mirL 18 1
-----CAGGTACCATTGACTAAAGCTAG----- mirL 23 1
-----AGCTTTGGTGGATGGTCTTTGC----- mirR 22 7
-----CTTTGGTGGATGGTCTTTG----- mirR 19 2
-----AGCTTTGGTGGATGGTCTTT----- mirR 20 1
-----CTAGCTTTGGTGGATGGTCTTTG----- mirR 23 1
-----AGCTTTGGTGGATGGTCT----- mirR 18 1
-----AGCTTTGGTGGATGGTCTTTG----- mirR 21 1
-----TTTGGTGGATGGTCTTTG----- mirR 18 1
-----GCTAAGTTCTCTGCCAACCCA----- morR 21 2
-----TGCTAAGTTCTCTGCCAA----- morR 18 1
-----GTTCTCTGCCAACCCAGCA morR 19 1

```

>mmu-mir-1952

```

ATATTGCAGCCACCTATCCCTCTCTTATTGATCTCCACCCTCCTTCTGTGCAGGCTTATTTCTGCTCCAAGGTGTGGATGACAAAAGAGATGGAAGTATGGGGGGGGGGAGGGCAGAGGC species len
ATATTGCAGCCACCTATCCC----- morL 20 1
-----GCAGCCACCTATCCCTCT----- morL 18 1
-----TCTTATTGATCTCCACC----- mirL 18 108

```



```

-----TCTTATTGATCTCCACCCT----- mirL 19 8
-----CTCTTATTGATCTCCACC----- mirL 18 1
-----TCTCTTATTGATCTCCAC----- mirL 18 1
-----TCTTATTGATCTCCACCCTC----- mirL 20 1
-----CTTATTGATCTCCACCCTC----- mirL 19 1
-----ATGGAAGTATGGGGGGCG----- mirR 19 3
-----GAGATGGAAGTATGGGGG----- mirR 19 2
-----GGGAGGGCACACAGAGGC morR 18 1

```

>mmu-mir-1936

| AAACCATCTCTTAGTATAGGGGGTGAAGGGGAGGCCAGTCACACAGAGGACTTTAGTCTGAGAAATTGAAACTAACTGACCTGCTGTGAACTGGCCTCATGACCCCCTG | species | len | reads |
|---------------------------------------------------------------------------------------------------------------|---------|-----|-------|
| AAACCATCTCTTAGTATAG                                                                                           | morL    | 19  | 1     |
| -----GGGGGTGAAGGGGAGGCCA-----                                                                                 | mirL    | 19  | 4     |
| -----TAGGGGTGAAGGGGAGG-----                                                                                   | mirL    | 18  | 2     |
| -----GGGTGAAGGGGAGGCCAG-----                                                                                  | mirL    | 18  | 2     |
| -----AGGGGTGAAGGGGAGGCC-----                                                                                  | mirL    | 19  | 1     |
| -----TAGGGGTGAAGGGGAGGCCA-----                                                                                | mirL    | 21  | 1     |
| -----AGGGGTGAAGGGGAGGC-----                                                                                   | mirL    | 18  | 1     |
| -----ATAGGGGTGAAGGGGAG-----                                                                                   | mirL    | 18  | 1     |
| -----TAACTGACCTGCTGTGAACTG-----                                                                               | mirR    | 21  | 19    |
| -----TAACTGACCTGCTGTGAAC-----                                                                                 | mirR    | 19  | 19    |
| -----TAACTGACCTGCTGTGAACTGGC-----                                                                             | mirR    | 23  | 18    |
| -----TAACTGACCTGCTGTGAACTGGCC-----                                                                            | mirR    | 24  | 16    |
| -----TAACTGACCTGCTGTGAACTGG-----                                                                              | mirR    | 22  | 10    |
| -----AACTGACCTGCTGTGAACTGGC-----                                                                              | mirR    | 22  | 6     |
| -----TAACTGACCTGCTGTGAA-----                                                                                  | mirR    | 18  | 5     |
| -----TAACTGACCTGCTGTGAACT-----                                                                                | mirR    | 20  | 3     |
| -----AACTGACCTGCTGTGAACTG-----                                                                                | mirR    | 20  | 3     |
| -----AACTGACCTGCTGTGAACTGG-----                                                                               | mirR    | 21  | 3     |
| -----CTGACCTGCTGTGAACTG-----                                                                                  | mirR    | 18  | 2     |
| -----AACTGACCTGCTGTGAACT-----                                                                                 | mirR    | 18  | 1     |
| -----AACTGACCTGCTGTGAACT-----                                                                                 | mirR    | 19  | 1     |
| -----ACTGACCTGCTGTGAACTG-----                                                                                 | mirR    | 19  | 1     |
| -----AACTGACCTGCTGTGAACTGGCCTCATGAC-----                                                                      | mirR    | 30  | 1     |
| -----AACTGACCTGCTGTGAACTGGCC-----                                                                             | mirR    | 23  | 1     |
| -----CTGACCTGCTGTGAACTGG-----                                                                                 | mirR    | 19  | 1     |
| -----CTAACTGACCTGCTGTGAACT-----                                                                               | mirR    | 20  | 1     |
| -----CTGGCCTCATGACCCCCT-----                                                                                  | morR    | 18  | 2     |
| -----CTGGCCTCATGACCCCCTG-----                                                                                 | morR    | 19  | 1     |

>mmu-mir-3472

| GGACATTTGGGTTCTTTCCAGCTTCTGGCTATTATAAATAAGGCTGCTCCTTATTATAATAGCCAGAAGCTGGAAGGAACCCAGATGCCCTCAACAGAGGAATGGATACAGAAAA | species | len | reads |
|---------------------------------------------------------------------------------------------------------------------|---------|-----|-------|
| -----TTTGGGTTCTTTCCAGCTT-----                                                                                       | morL    | 19  | 2     |
| -----ACATTTGGGTTCTTTCCA-----                                                                                        | morL    | 18  | 2     |
| GGACATTTGGGTTCTTTCC-----                                                                                            | morL    | 19  | 1     |
| -----CATTTGGGTTCTTTCCAG-----                                                                                        | morL    | 18  | 1     |

```

-----TCTGGCTATTATAAATAAGG----- mirL 20 1
-----CTTCTGGCTATTATAAATAAGGC----- mirL 23 1
-----GGAAGGAACCCAGATGCCCT----- mirR 21 20
-----GGAAGGAACCCAGATGCCCT----- mirR 20 16
-----AGGAACCCAGATGCCCT----- mirR 18 13
-----GAAGGAACCCAGATGCCCT----- mirR 20 8
-----GGAAGGAACCCAGATGCCCTC----- mirR 22 7
-----AAGGAACCCAGATGCCCT----- mirR 19 5
-----GGAAGGAACCCAGATGCCCT----- mirR 19 4
-----GAAGGAACCCAGATGCCCT----- mirR 19 4
-----GAAGGAACCCAGATGCCCTC----- mirR 21 4
-----GAAGGAACCCAGATGCCCTCA----- mirR 22 4
-----AAGGAACCCAGATGCCCTC----- mirR 20 3
-----TGGAAGGAACCCAGATGC----- mirR 18 2
-----TGGAAGGAACCCAGATGCCCTC----- mirR 23 2
-----GGAAGGAACCCAGATGCC----- mirR 18 2
-----GGAAGGAACCCAGATGCCCTCA----- mirR 23 1
-----AGGAACCCAGATGCCCTCAA----- mirR 21 1
-----GAAGGAACCCAGATGCCCT----- mirR 18 1
-----GAAGGAACCCAGATGCCCTCAAC----- mirR 24 1
-----AAGGAACCCAGATGCCCT----- mirR 18 1
-----AGGAACCCAGATGCCCTC----- mirR 19 1
-----AACAGAGGAATGGATACAGAAA----- morR 22 1
-----ACAGAGGAATGGATACAGAAAA----- morR 22 1
-----CAACAGAGGAATGGATACAGAAA----- morR 21 1
-----CAGAGGAATGGATACAGAAA----- morR 18 1

```

>mmu-mir-669f

```

CCATGTATGTGCCTGTGTGTATAGTTGTGTGTCATGTGCATGTGTGTATATGAATATACATATACATACACACACACGTATAAAGCAAGCACAACACA species len reads
-----ATGTGCCTGTGTGTATAG----- morL 18 1
CCATGTATGTGCCTGTGTG----- morL 19 1
-----AGTTGTGTGTCATGTGCATGT----- mirL 22 19
-----AGTTGTGTGTCATGTGC----- mirL 18 8
-----AGTTGTGTGTCATGTGCATGTGTG----- mirL 25 3
-----AGTTGTGTGTCATGTGCA----- mirL 19 2
-----TAGTTGTGTGTCATGTGCATGT----- mirL 23 2
-----AGTTGTGTGTCATGTGCATGTG----- mirL 23 2
-----AGTTGTGTGTCATGTGCAT----- mirL 20 2
-----TAGTTGTGTGTCATGTGC----- mirL 19 1
-----CATATACATACACACACACGT----- mirR 21 19
-----CATATACATACACACACACGTAT----- mirR 23 7
-----ATATACATACACACACACGTAT----- mirR 22 4
-----CATATACATACACACACACG----- mirR 20 4
-----ATACATACACACACACGT----- mirR 18 3
-----ATACATACACACACACGTAT----- mirR 20 3
-----CATATACATACACACACACGTA----- mirR 22 2

```

```
-----TACATATACATACACACACACG----- mirR 22 2
-----ACATATACATACACACACAC----- mirR 20 2
-----ATATACATACACACACACG----- mirR 19 2
-----ATATACATACACACACAC----- mirR 18 2
-----CATATACATACACACACA----- mirR 18 1
-----ATATACATACACACACACGTA----- mirR 21 1
-----ACATATACATACACACACACGTAT----- mirR 24 1
-----ATATACATACACACACACGT----- mirR 20 1
-----ATACATACACACACACGTATA----- mirR 21 1
-----TATACATACACACACACGTAT----- mirR 21 1
-----ATACATATACATACACACACGTAT----- mirR 26 1
-----TATAAACGCAAGCACAAAC--- morR 19 7
-----TATAAACGCAAGCACAAACAC- morR 21 2
-----TATAAACGCAAGCACAAA--- morR 18 2
-----TATAAACGCAAGCACAAACA-- morR 20 2
-----AAACGCAAGCACAAACACA morR 19 1
```

>mmu-mir-467b

```
TGCATATACATACACACACCAACACAC species len reads
---ATATACATACACACACCAACAC-- mirR 22 29
---TATACATACACACACCAACAC-- mirR 21 23
---ATATACATACACACACCAACA-- mirR 21 9
---TATACATACACACACCAACACA- mirR 22 8
---ATATACATACACACACCAAC--- mirR 20 6
---ATATACATACACACACCA----- mirR 18 5
----TATACATACACACACCAAC---- mirR 19 5
----ATACATACACACACCAACACA- mirR 21 4
----ATACATACACACACCAACAC-- mirR 20 4
----TATACATACACACACCAA----- mirR 18 4
----TATACATACACACACCAACA-- mirR 20 3
-----TACATACACACACCAACAC-- mirR 19 3
-----ATACATACACACACCAAC--- mirR 18 2
---ATATACATACACACACCAA----- mirR 19 2
-GCATATACATACACACACCA----- mirR 20 1
-----TACATACACACACCAACACAC mirR 21 1
----TATACATACACACACCAACACAC mirR 23 1
TGCATATACATACACACACCA----- mirR 21 1
```

>mmu-mir-717

```
ACTGTACCGTCATTTTTTCAGTCTCAGACAGAGATACCTTCTCTGAATTCATAGAAGCTGCTCTCCGTTCCGAAGGGATTTCAGAAGTGATAAATCCAGCAACTATCTCAGTACCTCATTAGTGTCTGCAGGCCAGCAT spe
ACTGTACCGTCATTTTTTC----- mor
ACTGTACCGTCATTTTTTCA----- mor
ACTGTACCGTCATTTTTTCAGTC----- mor
----ACCGTCATTTTTTCAGTCT----- mor
-----CTCAGACAGAGATACCTTCTCT----- mir
-----CTCAGACAGAGATACCTTCTCT----- mir
```

```

-----CTCAGACAGAGATACCTTCTCTG----- mir
-----CTCAGACAGAGATACCTTC----- mir
-----CTCAGACAGAGATACCTTCT----- mir
-----CTCAGACAGAGATACCTTCTCTGAA----- mir
-----CTCAGACAGAGATACCTT----- mir
-----TCAGACAGAGATACCTTC----- mir
-----TCTCAGACAGAGATACCT----- mir
-----CAGACAGAGATACCTTCTCT----- mir
-----AGACAGAGATACCTTCTC----- mir
-----TCTCAGTACCTCATTAGT----- mir
-----CAGTACCTCATTAGTGTG----- mir
-----GTGTCTGCAGGCCAGCAT mor

```

>mmu-mir-3091

```

GGCCATGGGTCTGGTTGGGCCCGCAGACTCGGAGTGCGGCCCTGACCAGTCTCAAGACCTGCGTGGTAACTCTGCAGGGACGGCCTCAGGATGCAGAACGACGCCGGCGAGTTT species len reads
---CATGGGTCTGGTTGGGCCCGCAG----- mirL 23 9
---CATGGGTCTGGTTGGGCCCGC----- mirL 21 7
---CATGGGTCTGGTTGGGCCCGCA----- mirL 22 7
---CATGGGTCTGGTTGGGCCCGCAGAC----- mirL 25 5
---CATGGGTCTGGTTGGGCC----- mirL 18 4
---ATGGGTCTGGTTGGGCC----- mirL 18 1
GGCCATGGGTCTGGTTGGG----- mirL 19 1
---CATGGGTCTGGTTGGGCCCGAGA----- mirL 24 1
-----CAGAACGACGCCGGCGAGTT----- mirR 20 43
-----CAGAACGACGCCGGCGAG----- mirR 18 16
-----CAGAACGACGCCGGCGAGT----- mirR 19 5
-----AGAACGACGCCGGCGAGTT----- mirR 19 2
-----CAGAACGACGCCGGCGAGTT----- mirR 21 1

```

>mmu-mir-3095

```

TCCACCCAGAGCCCTGTGCACAAGCTTTCTCATCTGTGACACTCGAGATGGTTTCAGGGAGTGGACACTGGAGAGAGAGCTTTTGCAAGTCGCTCCTCAT species len reads
---CCCAGAGCCCTGTGCACA----- morL 18 1
TCCACCCAGAGCCCTGTG----- morL 18 1
---CCCAGAGCCCTGTGCACAAG----- morL 20 1
---CCCAGAGCCCTGTGCACAA----- morL 19 1
-----AAGCTTTCTCATCTGTGACACT----- mirL 22 10
-----AAGCTTTCTCATCTGTGACACTC----- mirL 23 10
-----AAGCTTTCTCATCTGTGACAC----- mirL 21 6
-----AAGCTTTCTCATCTGTGACACTCGA----- mirL 25 2
-----AGCTTTCTCATCTGTGACACTC----- mirL 22 1
-----AGCTTTCTCATCTGTGACACTCGA----- mirL 24 1
-----CTTTCTCATCTGTGACACTC----- mirL 20 1
-----TCGAGATGGTTTCAGGGA----- loop 18 1
-----GAGATGGTTTCAGGGAGT----- loop 18 1
-----TGGACTGAGAGAGAGCTTTT----- mirR 23 27
-----TGGACTGAGAGAGAGCTTT----- mirR 22 17

```

```

-----TGGACACTGGAGAGAGAGCTTTTG----- mirR 24 4
-----TGGACACTGGAGAGAGAGCTT----- mirR 21 3
-----GGACACTGGAGAGAGAGCTTTT----- mirR 22 2
-----GTGGACACTGGAGAGAGAGCTTT----- mirR 23 2
-----TGGACACTGGAGAGAGAGCT----- mirR 20 1
-----TGGACACTGGAGAGAGAG----- mirR 18 1
-----AGTGGACACTGGAGAGAGAGC----- mirR 21 1
-----AGTGGACACTGGAGAGAGAG----- mirR 19 1
-----TGGACACTGGAGAGAGAGC----- mirR 19 1
-----GTGGACACTGGAGAGAGAG----- mirR 18 1
-----GACACTGGAGAGAGAGCT----- mirR 18 1
-----TGCAAGTCGCTCCTCAT morR 18 1

```

>mmu-mir-3103

```

TATGGGGAGGAGGGAGGATCTGCTGTTAGAAAGTCTCTGGTTTGTGACCTCTAACCTCTGATCCTTCCCACAGGCTCTTTGCCGACATCC species len reads
---GGGGAGGAGGGAGGATCT----- morL 18 1
TATGGGGAGGAGGGAGGA----- morL 18 1
-----GCTGTTAGAAAGTCTCTG----- mirL 18 1
-----CTGGTTTGTGACCTCTAA----- loop 18 1
-----TAACCTCTGATCCTTCCCACAG----- mirR 22 30
-----TAACCTCTGATCCTTCCCACA----- mirR 21 18
-----TAACCTCTGATCCTTCCCACAG----- mirR 23 12
-----TAACCTCTGATCCTTCCCAC----- mirR 20 9
-----TCTAACCTCTGATCCTTCCCACAG----- mirR 24 6
-----TCTAACCTCTGATCCTTCCCAC----- mirR 22 4
-----TAACCTCTGATCCTTCCCACAGGC----- mirR 24 3
-----TCTAACCTCTGATCCTTCCCA----- mirR 21 2
-----AACCTCTGATCCTTCCCACA----- mirR 20 1
-----TCTAACCTCTGATCCTTCC----- mirR 18 1
-----CCTCTGATCCTTCCCACA----- mirR 18 1
-----TAACCTCTGATCCTTCCCA----- mirR 19 1
-----CTCTAACCTCTGATCCTTCC----- mirR 19 1
-----TCTAACCTCTGATCCTTCCCACAG----- mirR 25 1
-----CTAACCTCTGATCCTTCCCACA----- mirR 22 1
-----CTCTAACCTCTGATCCTT----- mirR 18 1
-----TAACCTCTGATCCTTCCC----- mirR 18 1
-----AACCTCTGATCCTTCCCACAG----- mirR 21 1
-----AGGCTCTTTGCCGACATCC morR 19 1

```

>mmu-mir-344g

```

GTAAATTCACATAGAATTTCTGCCAGTCAGGCTCCTGGCAGGAGTCCTGCTCTCAGCTGGTTCCAGGCTCTAGCCAGGGGCTTGACTGCAAGCT species len reads
-----TTCACATAGAATTTCTGC----- morL 18 1
GTAAATTCACATAGAATT----- morL 18 1
-----GCCAGTCAGGCTCCTGGC----- mirL 18 20
-----AGTCAGGCTCCTGGCAGGAGT----- mirL 21 3
-----TGCCAGTCAGGCTCCTGG----- mirL 18 3

```

```

-----AGTCAGGCTCCTGGCAGGA----- mirL 19 2
-----AGTCAGGCTCCTGGCAGGAGTC----- mirL 22 2
-----AGTCAGGCTCCTGGCAGGAG----- mirL 20 2
-----TCTGCCAGTCAGGCTCCTGGCA----- mirL 22 1
-----TGCCAGTCAGGCTCCTGGCA----- mirL 20 1
-----AGTCAGGCTCCTGGCAGG----- mirL 18 1
-----CTCTAGCCAGGGGCTTGACTGC----- mirR 22 17
-----TAGCCAGGGGCTTGACTGCAA--- mirR 21 11
-----TAGCCAGGGGCTTGACTGC----- mirR 19 5
-----TAGCCAGGGGCTTGACTGCAAGC- mirR 23 5
-----CTCTAGCCAGGGGCTTGAC----- mirR 19 4
-----CTAGCCAGGGGCTTGACTGCAA--- mirR 22 4
-----CTCTAGCCAGGGGCTTGACTG----- mirR 21 3
-----CTAGCCAGGGGCTTGACTGCA--- mirR 21 2
-----TAGCCAGGGGCTTGACTGCA--- mirR 20 2
-----TCTAGCCAGGGGCTTGACTGC----- mirR 21 1
-----TAGCCAGGGGCTTGACTGCAAGCT mirR 24 1
-----TCTAGCCAGGGGCTTGACTGCA--- mirR 22 1
-----CTCTAGCCAGGGGCTTGACT----- mirR 20 1
-----GCTCTAGCCAGGGGCTTGACTGC----- mirR 23 1
-----TCTAGCCAGGGGCTTGACT----- mirR 19 1
-----CTAGCCAGGGGCTTGACTG----- mirR 19 1
-----TAGCCAGGGGCTTGACTGCAAG-- mirR 22 1

```

>mmu-mir-6691

```

TTTGTGCATGTGCGTATAGTTGTGTGTGCATGTATATGTGTGTATATGAATATACATATACATACACACCCATATATACACGCATTCATATGAACACA species len reads
TTTGTGCATGTGCGTATA----- morL 18 2
-----AGTTGTGTGTGCATGTATATGT----- mirL 22 25
-----AGTTGTGTGTGCATGTATAT----- mirL 20 24
-----AGTTGTGTGTGCATGTAT----- mirL 18 11
-----AGTTGTGTGTGCATGTATA----- mirL 19 7
-----AGTTGTGTGTGCATGTATATG----- mirL 21 6
-----TAGTTGTGTGTGCATGTATATGT----- mirL 23 3
-----GTTGTGTGTGCATGTATAT----- mirL 19 2
-----TAGTTGTGTGTGCATGTAT----- mirL 19 1
-----AGTTGTGTGTGCATGTATATGTG----- mirL 23 1
-----GTTGTGTGTGCATGTATATGT----- mirL 21 1
-----GTTGTGTGTGCATGTATATG----- mirL 20 1
-----AGTTGTGTGTGCATGTATATGTGT----- mirL 24 1
-----TAGTTGTGTGTGCATGTATAT----- mirL 21 1
-----ATATACATACACACCCATATAT----- mirR 22 4
-----ATACATACACACCCATATAT----- mirR 20 1
-----TATACATACACACCCATATAT----- mirR 21 1
-----ATACACGCATTCATATGAACACA morR 23 1
-----ACGCATTCATATGAACAC- morR 18 1
-----ACACGCATTCATATGAAC--- morR 18 1

```

>mmu-mir-3077

| Sequence                                                                      | species | len | reads |
|-------------------------------------------------------------------------------|---------|-----|-------|
| GCGGGCGCGGCCTGCGGACGGGTGGGCGGGCAGGCCAAATGGCGGCCCGAGGCTGACTCCCTGCTTCTCCGCAGACC | morL    | 18  | 1     |
| -CGGGCGCGGCCTGCGGAC-----                                                      | morL    | 18  | 1     |
| GCGGGCGCGGCCTGCGGA-----                                                       | mirL    | 20  | 1     |
| -----GGGTGGGCGGGCAGGCCAAA-----                                                | mirL    | 20  | 1     |
| -----CGGGTGGGCGGGCAGGCCAA-----                                                | mirR    | 22  | 16    |
| -----CTGACTCCCTGCTTCTCCGCAG-----                                              | mirR    | 23  | 12    |
| -----CTGACTCCCTGCTTCTCCGCAGA-----                                             | mirR    | 24  | 9     |
| -----CTGACTCCCTGCTTCTCCGCAGAC-----                                            | mirR    | 21  | 9     |
| -----CTGACTCCCTGCTTCTCCGCA-----                                               | mirR    | 20  | 9     |
| -----TGACTCCCTGCTTCTCCGCAG-----                                               | mirR    | 22  | 7     |
| -----TGACTCCCTGCTTCTCCGC-----                                                 | mirR    | 19  | 6     |
| -----CTGACTCCCTGCTTCTCCG-----                                                 | mirR    | 19  | 5     |
| -----TGACTCCCTGCTTCTCCGCAG-----                                               | mirR    | 21  | 5     |
| -----TGACTCCCTGCTTCTCCGCA-----                                                | mirR    | 20  | 3     |
| -----CTGACTCCCTGCTTCTCC-----                                                  | mirR    | 18  | 3     |
| -----TGACTCCCTGCTTCTCCGCAGAC-----                                             | mirR    | 23  | 3     |
| -----TGACTCCCTGCTTCTCCGCAGACC-----                                            | mirR    | 24  | 1     |
| -----GACTCCCTGCTTCTCCGCAG-----                                                | mirR    | 21  | 1     |
| -----TGACTCCCTGCTTCTCCG-----                                                  | mirR    | 18  | 1     |

>mmu-mir-466i

| Sequence                                                                     | species | len | reads |
|------------------------------------------------------------------------------|---------|-----|-------|
| TATATTATGTATGTATGTGTGTGTGTGTGTGTATATATATACACACACACATACACTACATGTATGCAACATATAT | mirL    | 21  | 3     |
| --TATTATGTATGTATGTGTGTG-----                                                 | mirL    | 19  | 2     |
| ----TATGTATGTATGTGTGTG-----                                                  | mirL    | 18  | 1     |
| ----TATGTATGTATGTGTGTG-----                                                  | mirL    | 22  | 1     |
| TATATTATGTATGTATGTGT-----                                                    | mirL    | 20  | 1     |
| ----TTATGTATGTATGTGTGTG-----                                                 | mirL    | 21  | 1     |
| -----TGTGTGTGTGTATATATATA-----                                               | loop    | 22  | 1     |
| -----ATACACACACACATACACTA-----                                               | mirR    | 22  | 18    |
| -----TATACACACACACATACAC-----                                                | mirR    | 21  | 11    |
| -----ATACACACACACATACACTAC-----                                              | mirR    | 23  | 10    |
| -----ATATACACACACACATACACA-----                                              | mirR    | 21  | 7     |
| -----TATACACACACACATACACA-----                                               | mirR    | 20  | 6     |
| -----TATACACACACATACA-----                                                   | mirR    | 18  | 5     |
| -----TATACACACACATACAC-----                                                  | mirR    | 19  | 4     |
| -----ATATACACACACATACAC-----                                                 | mirR    | 20  | 4     |
| -----CACACACACATACACTAC-----                                                 | mirR    | 20  | 3     |
| -----ATATACACACACATACA-----                                                  | mirR    | 19  | 2     |
| -----TACACACACATACACTAC-----                                                 | mirR    | 22  | 2     |
| -----ATATACACACACATAC-----                                                   | mirR    | 18  | 2     |
| -----ACACACACACATACACTACA-----                                               | mirR    | 22  | 1     |
| -----ACACACACACATACACTA-----                                                 | mirR    | 20  | 1     |

-----TATACACACACACATACACACT----- mirR 22 1  
-----CTACATGTATGCAACATA--- morR 18 4  
-----ACATGTATGCAACATATAT morR 19 1

>mmu-mir-669i

```
ACCAATAATGTGCATGTGTATAGTTGTGTGCATATTCATTTCTCTATATGACTATGCATATACACACATGCATACAAACTCACATACAGGAA species len reads
ACCAATAATGTGCATGTGTAT----- morL 23 1
---ATAATGTGCATGTGTAT----- morL 19 1
-----ATAGTTGTGTGCATATTCAT----- mirL 20 1
-----GTGTGTGCATATTCATTT----- mirL 19 1
-----TGCATATACACACATGCATAC----- mirR 21 43
-----GCATATACACACATGCATAC----- mirR 20 16
-----TGCATATACACACATGCATA----- mirR 20 11
-----ATATACACACATGCATAC----- mirR 18 8
-----GCATATACACACATGCATA----- mirR 19 2
-----TGCATATACACACATGCAT----- mirR 19 2
-----TATGCATATACACACATGCAT----- mirR 21 1
-----TGCATATACACACATGCATACA----- mirR 22 1
-----CATATACACACATGCATAC----- mirR 19 1
-----TACAAACTCACATACAGGA- morR 19 1
-----ACAAACTCACATACAGGAA morR 19 1
-----CAAACACTCACATACAGGAA morR 18 1
```

>mmu-mir-3090

```
GTCCTGCCACCCTATGATTCCTGTCCAGTGGTCTGGGTGGGGCCTGAGATCCTGAATTTCTAATGAGCTCCAGGTGACACCCTGACTCACTGTGCCAGAGGACTGCAGT species len reads
GTCCTGCCACCCTATGAT----- morL 18 1
-----CCACCCTATGATTCCTGT----- morL 18 1
-----TGTCCAGTGGTCTGGGT----- mirL 18 2
-----TGTCCAGTGGTCTGGGTG----- mirL 19 1
-----CCCAGTGGTCTGGGTGGG----- mirL 18 1
-----TCCCAGGTGACACCCTGACTCAC----- mirR 23 39
-----TCCCAGGTGACACCCTGACTCA----- mirR 22 31
-----TCCCAGGTGACACCCTGACTC----- mirR 21 3
-----TCCCAGGTGACACCCTGACT----- mirR 20 2
-----AGCTCCCAGGTGACACCCT----- mirR 19 1
-----CCCAGGTGACACCCTGACT----- mirR 19 1
-----CTCCCAGGTGACACCCTG----- mirR 18 1
-----GTGCCAGAGGACTGCAGT morR 18 2
-----CACTGTGCCAGAGGACTG---- morR 18 1
```

>mmu-mir-3471-2

```
AGAGAAAGGAGCTGCAATTGAAGAAATGCCTCCATGAGATCCAAGTGAAGGCATTTTCCCAATTAGTGATAAAGGGGAAAAGGCCCTTGTGGGTGGGACAATCTCTGGGCTGGTAGTCTTGGGTTCTATAAGAGAGCAG
AGAGAAAGGAGCTGCAATTG-----
--AGAAAGGAGCTGCAATTG-----
-----AGGAGCTGCAATTGAAGAA-----
-----AAGGAGCTGCAATTGAAGAAA-----
```



-----GGAGCTGCAATTGAAGAAA-----  
-----AAGGAGCTGCAATTGAAG-----  
-----AAATGCCTCCATGAGATC-----  
-----AAATGCCTCCATGAGATCCAAC-----  
-----AGAAATGCCTCCATGAGATC-----  
-----AAATGCCTCCATGAGATCCAAGTGAAG-----  
-----AAATGCCTCCATGAGATCC-----  
-----AAATGCCTCCATGAGATCCAAGT-----  
-----AATGCCTCCATGAGATCCAAC-----  
-----AATGCCTCCATGAGATCCAAGT-----  
-----AAATGCCTCCATGAGATCCAAGT-----  
-----AATGCCTCCATGAGATCCA-----  
-----AAGAAATGCCTCCATGAGATC-----  
-----AAATGCCTCCATGAGATCCA-----  
-----GAAATGCCTCCATGAGATC-----  
-----TGCCTCCATGAGATCCAAC-----  
-----GAAATGCCTCCATGAGATCCA-----

>mmu-mir-1186b

|                                                                                                   | species | len | reads |
|---------------------------------------------------------------------------------------------------|---------|-----|-------|
| TTCTCCTGCCTCTGCCTCCCAAGTGTGGGATTAAGGCATGCACCACTTTTGTGTAAGGAGCTGTGGTGCCTGACTGTGATCCCAAACTTGGAGGGGA | morL    | 18  | 9     |
| -----GCCTCCCAAGTGTGGGA-----                                                                       | morL    | 24  | 5     |
| -----GCCTCTGCCTCCCAAGTGTGGGA-----                                                                 | morL    | 25  | 4     |
| -----TGCTCTGCCTCCCAAGTGTGGGA-----                                                                 | morL    | 21  | 3     |
| -----TCTGCCTCCCAAGTGTGGGA-----                                                                    | morL    | 20  | 3     |
| -----TGCTCCCAAGTGTGGGAT-----                                                                      | morL    | 19  | 3     |
| -----TGCTCCCAAGTGTGGGA-----                                                                       | morL    | 23  | 2     |
| -----CTCTGCCTCCCAAGTGTGGGAT-----                                                                  | morL    | 26  | 2     |
| -----TGCTCTGCCTCCCAAGTGTGGGAT-----                                                                |         |     |       |

```
-----CTGCCTCCCAAGTGCTGGGAT----- morL 21 2
-----TCTGCCTCCCAAGTGCTG----- morL 18 2
-----TGCCTCCCAAGTGCTGGG----- morL 18 1
-----CTCTGCCTCCCAAGTGCTG----- morL 19 1
-----CCTCTGCCTCCCAAGTGCTGGGATT----- morL 25 1
-----GCCTCTGCCTCCCAAGTGCTG----- morL 21 1
-----CCTGCCTCTGCCTCCCAAGTGCTGGGAT----- morL 28 1
-----CTGCCTCCCAAGTGCTGGG----- morL 19 1
-----GCCTCCCAAGTGCTGGGATTA----- morL 21 1
-----GCCTCCCAAGTGCTGGGATT----- morL 20 1
-----CCTGCCTCTGCCTCCCAAGTGCTGGG----- morL 26 1
TTCTCCTGCCTCTGCCTCCCAAGTGCTGGGA----- morL 31 1
-----GCCTCCCAAGTGCTGGGAT----- morL 19 1
---TCCTGCCTCTGCCTCCCAAGTGCTGGGA----- morL 28 1
-----GCCTCTGCCTCCCAAGTGCTGGG----- morL 23 1
-----TCTGCCTCCCAAGTGCTGG----- morL 19 1
-----GATTAAAGGCATGCACCACCTTT----- mirL 22 3
-----TTAAAGGCATGCACCACCTTT----- mirL 20 3
-----AAAGGCATGCACCACCTTT----- mirL 18 2
-----GATTAAAGGCATGCACCA----- mirL 18 2
-----GATTAAAGGCATGCACCAC----- mirL 19 2
-----GGATTAAAGGCATGCACCA----- mirL 19 2
-----GGATTAAAGGCATGCACCAC----- mirL 21 1
-----GATTAAAGGCATGCACCACCTTT----- mirL 23 1
-----GGATTAAAGGCATGCACC----- mirL 18 1
-----AAGGCATGCACCACCTTT----- mirL 18 1
-----GGATTAAAGGCATGCACCAC----- mirL 20 1
-----TAAAGGCATGCACCACCTTT----- mirL 19 1
-----GATTAAAGGCATGCACCAC----- mirL 20 1
-----CCCAAAACTTGGAGGGGA----- mirR 18 3
-----GATCCCAAAACTTGGAGGG----- mirR 19 1
-----TCCCAAAACTTGGAGGGGA----- mirR 19 1
```

>mmu-mir-466j

```
GTGCATTTCGTGTGTTTGTGCATGTGTGTATGTGTGCACATTTATGTGTGTGCATGTGTATGTGTGTGTGCATGTGCATGTGTGTAATTGTGTATATATGTGCATACATGTGTGTGTTTGTGTGCGTATGTTTAAGTG
GTGCATTTCGTGTGTTTGTG-----
--GCATTTCGTGTGTTTGTGCA-----
--GCATTTCGTGTGTTTGTGC-----
---CATTCGTGTGTTTGTGCA-----
-----CATGTGTGTATGTGTGCACA-----
-----TGTGTGTATGTGTGCACA-----
-----ATGTGTGTATGTGTGCACA-----
-----CATGTGTGTATGTGTGCA-----
-----TGCATGTGTGTATGTGTGCACA-----
-----ATGTGTGTATGTGTGCAC-----
-----GCATGTGTGTATGTGTGCACA-----
```

```

-----ATGTGTGTATGTGTGCACATT-----
-----GCATGTGTGTATGTGTGC-----
-----CATACATGTGTGTGTTTGT-----
-----CATACATGTGTGTGTTTGT-----
-----TACATGTGTGTGTTTGTGT-----
-----ATACATGTGTGTGTTTGTGT-----
-----CATACATGTGTGTGTTTGTGT-----
-----CATACATGTGTGTGTTTGTGT-----
-----ATACATGTGTGTGTTTGTGT-----
-----TACATGTGTGTGTTTGTGT-----
-----GCATACATGTGTGTGTTTGTGT-----
-----GCATACATGTGTGTGTTTGTGT-----
-----GCATACATGTGTGTGTTTGTGTGC-----
-----GCATACATGTGTGTGTTT-----
-----TGCATACATGTGTGTGTTTGT-----
-----GCGTATGTTTAAAGTG-----
-----TGTGCGTATGTTTAAAGTG-----

```

>mmu-mir-3094

| Sequence                                                                                 | species | len | reads |
|------------------------------------------------------------------------------------------|---------|-----|-------|
| TGAACATTATAGATTGTTGGGGACATTTTTAAAGCATGGATTGGTTATTGATTGTCCTTAAATTGTGTCTCAAGTGTGCTACTGTGGC | morL    | 18  | 2     |
| --AACATTATAGATTGTTG-----                                                                 | morL    | 18  | 1     |
| TGAACATTATAGATTGT-----                                                                   | mirL    | 21  | 10    |
| -----TTGGGGACATTTTTAAAGCAT-----                                                          | mirL    | 22  | 4     |
| -----TTGGGGACATTTTTAAAGCATG-----                                                         | mirL    | 23  | 3     |
| -----TTGGGGACATTTTTAAAGCATGG-----                                                        | mirL    | 18  | 2     |
| -----TTGTTGGGGACATTTTTA-----                                                             | mirL    | 20  | 2     |
| -----GTTGGGGACATTTTTAAAGC-----                                                           | mirL    | 22  | 2     |
| -----GTTGGGGACATTTTTAAAGCAT-----                                                         | mirL    | 22  | 1     |
| -----TTGTTGGGGACATTTTTAAAGC-----                                                         | mirL    | 19  | 1     |
| -----TTGGGGACATTTTTAAAGC-----                                                            | mirL    | 19  | 1     |
| -----TGTTGGGGACATTTTTAAA-----                                                            | loop    | 19  | 2     |
| -----ATTGGTTATTGATTGTCC-----                                                             | loop    | 18  | 2     |
| -----ATGGATTGGTTATTGATT-----                                                             | loop    | 18  | 2     |
| -----GGATTGGTTATTGATTG-----                                                              | loop    | 18  | 1     |
| -----GATTGGTTATTGATTGT-----                                                              | loop    | 20  | 1     |
| -----GGATTGGTTATTGATTGTC-----                                                            | mirR    | 20  | 5     |
| -----TCCTTTAAATTGTGTCTCA-----                                                            | mirR    | 19  | 4     |
| -----TCCTTTAAATTGTGTCTC-----                                                             | mirR    | 24  | 3     |
| -----TCCTTTAAATTGTGTCTCAAGTG-----                                                        | mirR    | 21  | 3     |
| -----TCCTTTAAATTGTGTCTCAA-----                                                           | mirR    | 22  | 3     |
| -----TGTCCTTAAATTGTGTCTCA-----                                                           | mirR    | 21  | 2     |
| -----TGTCCTTAAATTGTGTCTC-----                                                            | mirR    | 22  | 2     |
| -----CCTTTAAATTGTGTCTCAAGT-----                                                          | mirR    | 23  | 2     |
| -----TGTCCTTAAATTGTGTCTCAA-----                                                          | mirR    | 22  | 1     |
| -----TCCTTTAAATTGTGTCTCAAG-----                                                          | mirR    | 23  | 1     |
| -----TTGTCCTTTAAATTGTGTCTCA-----                                                         | mirR    | 23  | 1     |

```
-----GTCCTTTAAATTGTGCCTCA----- mirR 21 1
-----GTCCTTTAAATFGTGCCTC----- mirR 20 1
-----TCCTTTAAATFGTGCCTCAAGT----- mirR 23 1
-----GTCCTTTAAATFGTGCCTCAA----- mirR 22 1
-----CCTTTAAATFGTGCCTCAAG----- mirR 21 1
-----CCTTTAAATFGTGCCTC----- mirR 18 1
-----TCAAGTGTGCTACTGTGG----- morR 18 1
-----CAAGTGTGCTACTGTGGC morR 18 1
```

>mmu-mir-3098

```
CACACATTGTGGTTGGGAGGAGTCCTAACAGCAGGAGTAGGAGCTCTGATTATCCCCTGCTTCTGCTGCCTGCCTTTAGGACCCTTTCCCACAACCGG species len reads
CACACATTGTGGTTGGGAG----- morL 19 3
-----TTGTGGTTGGGAGGAGTC----- morL 18 1
---ACATTGTGGTTGGGAGGA----- morL 18 1
-----TCCTAACAGCAGGAGTAGGAGC----- mirL 22 11
-----TCCTAACAGCAGGAGTAGGAG----- mirL 21 4
-----TCCTAACAGCAGGAGTAGG----- mirL 19 3
-----TCCTAACAGCAGGAGTAG----- mirL 18 3
-------TAACAGCAGGAGTAGGAG----- mirL 18 1
-----TCCTAACAGCAGGAGTAGGA----- mirL 20 1
-----TCCTAACAGCAGGAGTAGGAGCTC----- mirL 24 1
-----CCTAACAGCAGGAGTAGGA----- mirL 19 1
-----TCCTAACAGCAGGAGTAGGAGCT----- mirL 23 1
-----AGTCCTAACAGCAGGAGT----- mirL 18 1
-----AGTCCTAACAGCAGGAGTAGGAG----- mirL 23 1
-----GCTCTGATTATCCCCTGCT----- loop 19 1
-----CTCTGATTATCCCCTGCT----- loop 18 1
-----AGCTCTGATTATCCCCTGC----- loop 19 1
-----TTCTGCTGCCTGCCTTTAGGAC----- mirR 22 17
-----TTCTGCTGCCTGCCTTTAGGACC----- mirR 23 5
-----TTCTGCTGCCTGCCTTTAGGACCC----- mirR 24 3
-----TTCTGCTGCCTGCCTTTAG----- mirR 19 3
-----TCTGCTGCCTGCCTTTAGGACC----- mirR 22 1
-----CCCTTTCCCACAACCGG morR 18 2
-----GACCCTTTCCCACAACC-- morR 18 1
```

>mmu-mir-467g

```
TTGTGCATGCATATATATATATGTGTGTGTGTATATATATATACATATATATACATACATACACATGTATATGTATATATACATACACACATATATATATTCATGTATATATATATATATGTATATTCATGTATATATA
TTGTGCATGCATATATATATA-----
-----TATGTGTGTGTGTATATATAT-----
-----ATATATGTGTGTGTGTATATA-----
-----TATGTGTGTGTGTATATATA-----
-----ATGTGTGTGTGTATATATATA-----
-----ATATGTGTGTGTGTATATA-----
-----ATATGTGTGTGTGTATATAT-----
-----ATATATGTGTGTGTATAT-----
```

```

-----TATGTGTGTGTGTATATA-----
-----ATATGTGTGTGTATATATAT-----
-----ATTCATGTATATATATAT-----
-----TATTCATGTATATATATATA-----
-----TATTCATGTATATATATATA-----
-----ATTCATGTATATATATATATAT-----
-----ATTCATGTATATATATATATA-----
-----ATTCATGTATATATATATATA-----
-----TATTCATGTATATATATATAT-----
-----TTCATGTATATATATATA-----
-----TATTCATGTATATATATATATA-----
-----TATATATGTATATTCATG-----
-----ATGTATATTCATGTATATATA-----

```

```

>mmu-mir-466n
GCATATACATGAGAGCATAACATAGACACACGTCATGTGCGCTTG species len reads
---TATACATGAGAGCATAACATAG----- mirR 21 31
---TATACATGAGAGCATAACATAGA----- mirR 22 10
---TATACATGAGAGCATAACATAGAC----- mirR 23 5
---ATACATGAGAGCATAACAT----- mirR 18 4
--ATATACATGAGAGCATAACAT----- mirR 20 3
---ATACATGAGAGCATAACATAGA----- mirR 21 3
--ATATACATGAGAGCATAACATAG----- mirR 22 1
--ATATACATGAGAGCATAAC----- mirR 18 1
---ATACATGAGAGCATAACATAG----- mirR 20 1
--ATATACATGAGAGCATAACA----- mirR 19 1
---TATACATGAGAGCATAACAT----- mirR 19 1
GCATATACATGAGAGCAT----- mirR 18 1
-----TAGACACACGTCATGTGC----- morR 19 2
-----CACGTGCATGTGCGCTTG morR 18 1
-----TAGACACACGTCATGTGCGC--- morR 21 1

```

```

>mmu-mir-374c
GAGCCATAACCTCGGACAATGATAATACAACCTGCTAAGTGCTAGAACACTTAGCAGGTTGTATTATATCCACCCGAGTAGGATTTCTTCA species len reads
GAGCCATAACCTCGGACA----- morL 18 1
-----ATAATACAACCTGCTAAGTGC----- mirL 21 12
-----TGATAATACAACCTGCTAAGTGC----- mirL 23 7
-----ATACAACCTGCTAAGTGC----- mirL 18 3
-----AATACAACCTGCTAAGTGCTA----- mirL 21 1
-----ATACAACCTGCTAAGTGCT----- mirL 19 1
-----TAATACAACCTGCTAAGTGCTAG----- mirL 23 1
-----AATACAACCTGCTAAGTGC----- mirL 19 1
-----CTTAGCAGGTTGTATTATATC----- mirR 21 11
-----CTTAGCAGGTTGTATTATATCC----- mirR 22 10
-----TAGCAGGTTGTATTATATC----- mirR 19 3
-----ACACTTAGCAGGTTGTATTATAT----- mirR 23 2

```

C:\Documents and Settings\hong\Desktop\Hippocampus-total RNA.txt

```
-----CTTAGCAGGTTGTATTATAT----- mirR 20 2
-----TAGCAGGTTGTATTATATCC----- mirR 20 1
-----TAGCAGGTTGTATTATATCCAC----- mirR 22 1
-----AGCAGGTTGTATTATATC----- mirR 18 1
-----CTTAGCAGGTTGTATTATA----- mirR 19 1
-----ATCCACCCGAGTAGGATTTTC----- morR 20 2
-----CACCCGAGTAGGATTTCT--- morR 18 2
-----CCGAGTAGGATTTCTTCA morR 18 1
-----CCCAGTAGGATTTCTTC- morR 18 1
```

>mmu-mir-3471-1

```
TGAGCCTCCATGAGATCCAACCTGTAAGGCATTCCTCAATTAGTGCTGTTATGCTGCTAGTGATGCTCTGTCCAGTTCTTTTGGAGGTATTAGAGCTATGAGTTTTCTTTTACCCTGCTTTTCATTGTGTCCCATA
--AGCCTCCATGAGATCCAAC-----
---CCTCCATGAGATCCAAC-----
TGAGCCTCCATGAGATCC-----
--GCCTCCATGAGATCCAAC-----
-GAGCCTCCATGAGATCCA-----
-----ACTGTAAGGCATTCCTC-----
-----AACTGTAAGGCATTCCTCAATTAGTG-----
-----GTAAGGCATTCCTCAAT-----
-----CCAACTGTAAGGCATTCCT-----
-----AACTGTAAGGCATTCCT-----
-----TGCTTTCATTGTGTCCCA--
-----CTGCTTTCATTGTGTCCCA--
-----GCTTTCATTGTGTCCCA--
-----ACTGCTTTCATTGTGTCCCA--
-----CTTTCATTGTGTCCCA--
-----CTTTCATTGTGTCCCA--
-----GCTTTCATTGTGTCCCA--
-----TGCTTTCATTGTGTCCCA--
-----CTGCTTTCATTGTGTCCCA--
-----TTTCATTGTGTCCCA--
-----CTGCTTTCATTGTGTCCCA--
-----CTGCTTTCATTGTGTCCCA--
-----ACTGCTTTCATTGTGTCCCA--
-----TA
-----TA
```

>mmu-mir-1937b-2

```
TCTCTTGGGTGGTCGCGTCAATCCCGGACGAGCCCCAAATGAAAGATCCCCAAAGGGAGACCCTCACTCAAGCCTCGGGATGTGGCGGGACCCAAGAGAG species len reads
TCTCTTGGGTGGTCGCGT----- morL 18 3
---CTTGGGTGGTCGCGTCAA----- morL 18 1
-----TCCCGGACGAGCCCCAAATGA----- mirL 22 3
-----TCCCGGACGAGCCCCAAATGAA----- mirL 23 3
-----CCCGGACGAGCCCCAAATGAAA----- mirL 23 2
```

```

-----ATCCCGGACGAGCCCCAAATGA----- mirL 23 2
-----CGGACGAGCCCCAAATGAAAGATCCCC----- mirL 28 1
-----CCCGGACGAGCCCCAAATGAA----- mirL 22 1
-----AATCCCGGACGAGCCCCAAATGA----- mirL 24 1
-----ATCCCGGACGAGCCCCAAATGAA----- mirL 24 1
-----TCCCGGACGAGCCCCAAATGAAA----- mirL 24 1
-----CAATCCCGGACGAGCCCCAAA----- mirL 22 1
-----TCCCGGACGAGCCCCAAATGAAAGATCCC----- mirL 30 1
-----AAAGATCCCCAAAGGGGAGAC----- loop 20 2
-----AAAGATCCCCAAAGGGGAGA----- loop 19 1
-----ATCCCAAAGGGGAGACCC----- loop 18 1
-----AGATCCCCAAAGGGGAGACC----- loop 19 1
-----GAAAGATCCCCAAAGGGA----- loop 18 1
-----CCCTCACTCAAGCCTCGGGA----- mirR 20 6
-----CCCTCACTCAAGCCTCGGGAT----- mirR 21 5
-----GACCCTCACTCAAGCCTCGGGA----- mirR 22 4
-----CTCACTCAAGCCTCGGGA----- mirR 18 4
-----CTCACTCAAGCCTCGGGAT----- mirR 19 3
-----GACCCTCACTCAAGCCTCGGGAT----- mirR 23 3
-----ACCCTCACTCAAGCCTCGGGA----- mirR 21 1
-----GACCCTCACTCAAGCCTCG----- mirR 19 1
-----ACCCTCACTCAAGCCTCGGGAT----- mirR 22 1
-----CCTCACTCAAGCCTCGGGA----- mirR 19 1
-----AGACCCTCACTCAAGCCTCGGGAT----- mirR 24 1
-----ACCCTCACTCAAGCCTCGGGATGTG----- mirR 25 1
-----CCCTCACTCAAGCCTCGG----- mirR 18 1
-----AGACCCTCACTCAAGCCTCGGGA----- mirR 23 1
-----GTGGCGGGACCCAAGAGAG morR 20 1
-----TGGCGGGACCCAAGAGAG morR 19 1

```

>mmu-mir-3067

```

ACTCCTGCCCCAGCTTCCCCAGTTCTCAGGCCGCTGTGGTGTGAAGTTAGGTTACCAAGCGGCTGCCCTGGGAGAGGGGGAGGTGTGCCTCCTTCCCCCTG species len reads
--TCCTGCCCCAGCTTCCCC----- morL 18 8
-CTCCTGCCCCAGCTTCCCCAG----- morL 21 2
---CCTGCCCCAGCTTCCCCAG----- morL 19 2
---CCTGCCCCAGCTTCCCCA----- morL 18 1
--TCCTGCCCCAGCTTCCCCAG----- morL 20 1
--TCCTGCCCCAGCTTCCCCA----- morL 19 1
ACTCCTGCCCCAGCTTCC----- morL 18 1
-----AGTTCTCAGGCCGCTGTGGTGT----- mirL 23 5
-----AGTTCTCAGGCCGCTGTGGTG----- mirL 22 2
-----AGTTCTCAGGCCGCTGTGG----- mirL 20 1
-----TGCCCTGGGAGAGGGGGA----- mirR 18 5
-----GCCCTGGGAGAGGGGGAG----- mirR 18 4
-----CCCTGGGAGAGGGGGAGG----- mirR 18 3
-----CCCTGGGAGAGGGGGAGGT----- mirR 19 2

```

```

-----GCCCTGGGAGAGGGGGAGG----- mirR 19 2
-----CTGCCCTGGGAGAGGGGG----- mirR 18 2
-----CCTGGGAGAGGGGGAGGT----- mirR 19 2
-----CCTGGGAGAGGGGGAGGT----- mirR 18 2
-----TGCCCTGGGAGAGGGGGAG----- mirR 19 2
-----GCTGCCCTGGGAGAGGGGG----- mirR 18 2
-----CCCTGGGAGAGGGGGAGGT----- mirR 20 1
-----GCTGCCCTGGGAGAGGGGG----- mirR 19 1
-----GTGCCTCCTCTTCCCCCTG morR 19 2
-----GGAGGTGTGCCTCCTCTTCC---- morR 20 1
-----TGTGCCTCCTCTTCCCCCT- morR 19 1
-----GGTGTGCCTCCTCTTCCCC-- morR 19 1
-----GTGCCTCCTCTTCCCCCT- morR 18 1
-----GAGGTGTGCCTCCTCTTCCCC-- morR 22 1
-----TGTGCCTCCTCTTCCCC-- morR 18 1

```

>mmu-mir-1904

```

GCTGTTCTGCTCCTCTGGAGGGAGGTTCTGTTTGCACACCTCTCTTCAGGTAGATTAACATTTTATTTGCAAACCAACTTTGGCAGAGT species len reads
---GTTCTGCTCCTCTGGAGGGAGGT----- mirL 23 10
---GTTCTGCTCCTCTGGAGGGAGG----- mirL 22 6
---CTGCTCCTCTGGAGGGAGG----- mirL 19 3
---GTTCTGCTCCTCTGGAGGGAG----- mirL 21 2
---CTGCTCCTCTGGAGGGAG----- mirL 18 2
---TCTGCTCCTCTGGAGGGA----- mirL 18 1
---TCTGCTCCTCTGGAGGGAGG----- mirL 20 1
---GTTCTGCTCCTCTGGAGG----- mirL 18 1
---TCTGCTCCTCTGGAGGGAGGT----- mirL 21 1
---TTCTGCTCCTCTGGAGGG----- mirL 18 1
---CTGCTCCTCTGGAGGGAGGT----- mirL 20 1
GCTGTTCTGCTCCTCTGGA----- mirL 19 1
---GTTCTGCTCCTCTGGAGGG----- mirL 19 1
-----GATTAACATTTTATTTG----- mirR 18 13
-----ATTAACATTTTATTTGC----- mirR 18 9
-----AACCAACTTTGGCAGAGT morR 18 2
-----TTGCAAACCAACTTTGG----- morR 18 1

```

>mmu-mir-718

```

CGGCGCGGACGCCCGTGTGGCGGAAGGCCGCGGAGGGCAAGATGGCGGCGGGTTCGAGCGCCGCTCTTCCGCCCGCCGGGTGTCGACAGAGGCCGGCCTGAAG species len reads
CGGCGCGGACGCCCGG----- morL 18 2
---CGGACGCCCGTGTGG----- morL 18 2
---CGCGGACGCCCGTGTG----- morL 19 1
-----GGCGGAAGGCCGCGGAGGGCAAGATG----- mirL 26 2
-----CGGAAGGCCGCGGAGGGC----- mirL 18 1
-----CGGCGGGTTCGAGCGCCGC----- loop 19 2
-----CGGCGGGTTCGAGCGCCGC----- loop 18 1
-----GCGGCGGGTTCGAGCGCCGC----- loop 19 1

```



C:\Documents and Settings\hong\Desktop\Hippocampus-total RNA.txt

```
-----CTTCCGCCCGGCCGGGTGT----- mirR 19 13
-----CTTCCGCCCGGCCGGGTGTCG----- mirR 21 11
-----CTTCCGCCCGGCCGGGTGTCG----- mirR 22 6
-----CTTCCGCCCGGCCGGGTG----- mirR 18 4
-----CTTCCGCCCGGCCGGGTGTC----- mirR 20 2
-----TCCGCCCGGCCGGGTGTCG----- mirR 19 1
-----TCTTCCGCCCGGCCGGGT----- mirR 18 1
-----TCGCACGAGGCCGCCTGAAG morR 21 1
-----GCACGAGGCCGCCTGAA- morR 18 1
```

>mmu-mir-3088

```
GGGAAGCCAGGACCTCAGTGCCTGCTATGCAGTTGTTTCATGAGCTCTGGCTCCGAAGGTTTCATGAGCAGCTGCAAAGGTGTTGCTGCTGTCAAGAACACTTCTTTGGCTTCAAAGATTCAGCAC species len r
-----CCAGGACCTCAGTGCCTG----- morL 18 1
GGGAAGCCAGGACCTCAGTGC----- morL 20 1
-----CCAGGACCTCAGTGCCTGCT----- morL 20 1
---AAGCCAGGACCTCAGTGCCT----- morL 20 1
-----GCTATGCAGTTGTTTCATGAGC----- mirL 21 5
-----GCTATGCAGTTGTTTCATGA----- mirL 19 1
-----TGCTATGCAGTTGTTTCATGAG----- mirL 21 1
-----GCTATGCAGTTGTTTCATGAG----- mirL 20 1
-----GCTATGCAGTTGTTTCATGAGCTCT----- mirL 24 1
-----GGCTTCAAAGATTCAGCA----- mirR 19 25
-----GCTTCAAAGATTCAGCAC mirR 19 4
-----GCTTCAAAGATTCAGCA----- mirR 18 2
-----TGGCTTCAAAGATTCAGCA----- mirR 20 2
-----TGGCTTCAAAGATTCAG--- mirR 18 1
-----TGGCTTCAAAGATTCAGCAC mirR 21 1
```

>mmu-mir-1942

```
TGGATATTTGAATAAAGAGAAGAGGCTATTTAATGTTAGACATCTAACCTCAGATGTCTTCATCTGGTTGGCCTCTTGTAAAGAGGGAGGGGCTTTGGG species len reads
TGGATATTTGAATAAAGA----- morL 18 1
---TATTTGAATAAAGAGAAG----- morL 18 1
---ATATTTGAATAAAGAGAAG----- morL 19 1
-----AGAGGCTATTTAATGTTAGA----- mirL 21 1
-----CTAACCTCAGATGTCTTC----- loop 18 1
-----GACATCTAACCTCAGATGTCT----- loop 21 1
-----TCTAACCTCAGATGTCTTC----- loop 19 1
-----TCTGGTTGGCCTCTTGTA----- mirR 18 30
-----TCTGGTTGGCCTCTTGTA----- mirR 19 4
-----TCTGGTTGGCCTCTTGTAAG----- mirR 20 1
-----GGAGGGAGGGGCTTTGGG morR 18 1
-----AAGGAGGGAGGGGCTTTG-- morR 18 1
-----TAAGGAGGGAGGGGCTTT--- morR 18 1
```

>mmu-mir-466k

```
ACATATATATGTGTGTGTGTGTGTGTGTGTGTACATGTACATGTGAGTATGTGTGTGTATATGTTTGTACATGTGCATGTGTGTGAGTATGTGAATATATGTGTATATGTGTGCATGTGCATGTGTGTATGTTGAGT s
```

```

-----TATATGTGTGTGTGTGTGTGT----- m
ACATATATATGTGTGTGTGTGTGTGTGT----- m
-----TGTACATGTACATGTGAGTATG----- m
-----GTACATGTACATGTGAGTATG----- m
-----TGTACATGTACATGTGAG----- m
-----TACATGTACATGTGAGTATG----- m
-----TGTACATGTACATGTGAGTA----- m
-----TGTACATGTACATGTGAGTATGT----- m
-----TGTACATGTACATGTGAGTAT----- m
-----TGTACATGTACATGTGAGTATGTG----- m
-----GTACATGTACATGTGAGTAT----- m
-----GTACATGTACATGTGAGTATGTG----- m
-----TGTACATGTACATGTGAGT----- m
-----ATGTGTATATGTGTGCATGT----- m
-----TGTATATGTGTGCATGTGCATGT----- m
-----ATATGTGTATATGTGTGC----- m
-----TGTATATGTGTGCATGTGC----- m
-----ATATGTGTATATGTGTGCATG----- m
-----TATGTGTATATGTGTGCA----- m
-----TGCATGTGTGTGTATGGT----- m
-----CATGTGTGTGTATGGTGAGT----- m
-----ATGTGTGTGTATGGTGAGT----- m
-----TGTGTGTGTATGGTGAGT----- m
-----CATGTGTGTGTATGGTGA----- m
-----ATGTGTGTGTATGGTGAG----- m

```

>mmu-mir-1937a

| TTGGGGTTCTGGGTGCTCCCAAATCCCGGACGAGCCCCAAATGTAGGACCCCCCAATATGGCGACTCCCCTCTAATCCAGGGATAGGGTGCACCCACGAACACGCAAGAATCC | species | len | reads |
|-------------------------------------------------------------------------------------------------------------------|---------|-----|-------|
| TTGGGGTTCTGGGTGCTC-----                                                                                           | morL    | 18  | 1     |
| -----CCAAATCCCGGACGAGCCCCAA-----                                                                                  | mirL    | 23  | 10    |
| -----CAAATCCCGGACGAGCCCCAA-----                                                                                   | mirL    | 22  | 3     |
| -----CCCAAATCCCGGACGAGCCCC-----                                                                                   | mirL    | 22  | 3     |
| -----AAATCCCGGACGAGCCCCAAAT-----                                                                                  | mirL    | 23  | 3     |
| -----CCAAATCCCGGACGAGCCC-----                                                                                     | mirL    | 19  | 2     |
| -----CAAATCCCGGACGAGCCCCAAA-----                                                                                  | mirL    | 23  | 2     |
| -----CAAATCCCGGACGAGCCCCAAAT-----                                                                                 | mirL    | 24  | 2     |
| -----CCAAATCCCGGACGAGCCCCAAA-----                                                                                 | mirL    | 24  | 2     |
| -----CCCAAATCCCGGACGAGCC-----                                                                                     | mirL    | 19  | 1     |
| -----AATCCCGGACGAGCCCCAAATGT-----                                                                                 | mirL    | 24  | 1     |
| -----CCCAAATCCCGGACGAGCCCCCA-----                                                                                 | mirL    | 23  | 1     |
| -----CCAAATCCCGGACGAGCCCCCA-----                                                                                  | mirL    | 22  | 1     |
| -----AAATCCCGGACGAGCCCCCAA-----                                                                                   | mirL    | 21  | 1     |
| -----AAATCCCGGACGAGCCCCAAA-----                                                                                   | mirL    | 22  | 1     |
| -----CAAATCCCGGACGAGCCCCAAATG-----                                                                                | mirL    | 25  | 1     |
| -----CCAGGGATAGGGTGCACC-----                                                                                      | mirR    | 18  | 2     |
| -----TCCAGGGATAGGGTGCACC-----                                                                                     | mirR    | 19  | 1     |

```

-----ATCCAGGGATAGGGTGCA----- mirR 18 1
-----ACGAACACGCAAGAATCC morR 18 1
-----CCCACGAACACGCAAGAA--- morR 18 1
-----ACCCACGAACACGCAAGA---- morR 18 1

>mmu-mir-669b
AGAATTCATGGGATGTCCCCATGAATGTATGTGCATGTGTATATAGTTTTGTGTGCATGTGCATGTGTGTCTATTAATGTACATATACATACACACAAACATATACACGCATGCGCAGATACAGAC species len
--AATTCATGGGATGTCCCC----- morL 18 1
---TTCATGGGATGTCCCCA----- morL 18 1
AGAATTCATGGGATGTCC----- morL 18 1
-----ATGAATGTATGTGCATGT----- mirL 18 8
-----GAATGTATGTGCATGTGT----- mirL 18 3
-----AATGTATGTGCATGTGTAT----- mirL 19 1
-----ATATACATACACACAAACATAT----- mirR 22 6
-----TATACATACACACAAACA----- mirR 18 4
-----ATATACATACACACAAACA----- mirR 19 4
-----ATACATACACACAAACATAT----- mirR 20 3
-----ATATACATACACACAAACATA----- mirR 21 3
-----TATACATACACACAAACATA----- mirR 20 1
-----ACATATACATACACACAAAC----- mirR 20 1
-----TATACATACACACAAACATAT----- mirR 21 1
-----ATACATACACACAAACATA----- mirR 19 1
-----TACATATACATACACACAAACA----- mirR 22 1
-----ACATATACATACACACAAACA----- mirR 21 1
-----CGCATGCGCAGATACAGAC morR 19 1

>mmu-mir-1199
AAGCCTGCGCCGGAGCCGGGTCTGAGTCCCGGTCGCGCGGGCGAGGAACACTCATGAGTTGCGCGTGCGGCCGGTGCTCAGTCGGCCCCGGTCCGGTACTCCGC species len reads
AAGCCTGCGCCGGAGCCG----- morL 18 1
----TGCGCCGGAGCCGGGTCT----- morL 19 1
-----TCTGAGTCCCGGTCGCGCGG----- mirL 20 10
-----TCTGAGTCCCGGTCGCGC----- mirL 18 7
-----TCTGAGTCCCGGTCGCGCG----- mirL 19 3
-----TGAGTCCCGGTCGCGCGG----- mirL 18 3
-----TCTGAGTCCCGGTCGCGCGG----- mirL 21 3
-----CTGAGTCCCGGTCGCGCGG----- mirL 19 2
-----TCTGAGTCCCGGTCGCGCGGGCG----- mirL 23 2
-----CTGAGTCCCGGTCGCGCG----- mirL 18 2
-----GAGTCCCGGTCGCGCGG----- mirL 18 1
-----GAGTCCCGGTCGCGCGG----- mirL 19 1
-----CGGTGCTCAGTCGGCCCCG----- mirR 18 2
-----GGCCGGTGCTCAGTCGGC----- mirR 18 1
-----GGCCGGTGCTCAGTCGGCC----- mirR 19 1
-----CCGGTCCGGTACTCCGC morR 18 1

>mmu-mir-3100

```

|                                                                                        | species | len | reads |
|----------------------------------------------------------------------------------------|---------|-----|-------|
| GTGCGGGGTCTCTGTGCTTGGGAACGGGGTGTCTTTGGGAGTCTTGGGGGCTACCAAACCCCTGTGACACACCCGCTCCCAGTACC | morL    | 18  | 5     |
| -----TGCTTGGGAACGGGGTGT-----                                                           | morL    | 18  | 2     |
| -----GTGCTTGGGAACGGGGT-----                                                            | morL    | 19  | 1     |
| -----TGTGCTTGGGAACGGGGT-----                                                           | morL    | 19  | 1     |
| -----CTGTGCTTGGGAACGGGGT-----                                                          | morL    | 31  | 1     |
| GTGCGGGGTCTCTGTGCTTGGGAACGGGG                                                          | morL    | 19  | 1     |
| -----TGCTTGGGAACGGGGTGT-----                                                           | morL    | 18  | 1     |
| -----CTGTGCTTGGGAACGGGG-----                                                           | mirL    | 18  | 3     |
| -----CTTTGGGAGTCTTGGGG-----                                                            | mirL    | 19  | 1     |
| -----TCTTTGGGAGTCTTGGGG-----                                                           | mirR    | 23  | 5     |
| -----CTGTGACACACCCGCTCCCAGTA-----                                                      | mirR    | 22  | 3     |
| -----CTGTGACACACCCGCTCCCAGT-----                                                       | mirR    | 18  | 3     |
| -----CTGTGACACACCCGCTCC-----                                                           | mirR    | 23  | 2     |
| -----TGTGACACACCCGCTCCCAGTAC-----                                                      | mirR    | 25  | 2     |
| -----CTGTGACACACCCGCTCCCAGTACC-----                                                    | mirR    | 19  | 2     |
| -----CTGTGACACACCCGCTCCC-----                                                          | mirR    | 22  | 1     |
| -----TGTGACACACCCGCTCCCAGTA-----                                                       | mirR    | 19  | 1     |
| -----CCCCTGTGACACACCCGCT-----                                                          | mirR    | 22  | 1     |
| -----CCTGTGACACACCCGCTCCCAG-----                                                       | mirR    | 18  | 1     |
| -----CCCCTGTGACACACCCGCT-----                                                          | mirR    | 19  | 1     |
| -----TGTGACACACCCGCTCCCA-----                                                          | mirR    | 23  | 1     |
| -----CCTGTGACACACCCGCTCCCAGT-----                                                      |         |     |       |

>mmu-mir-680-2

CGAGGGAGAATTATACAAAGAACAAGAAGTGGGCATCTGCTGACATGGGGGCCGAAGTCAGGCGCCAGGCATCGGGCACTCTGGATCTTATCTCTGGAACATTGATCCTCCTTGACAGCCTTGGGGGTCAGGCTGGGCTC  
-----AGAACAAGAAGTGGGCA-----  
CGAGGGAGAATTATACAAAGAACAAGAAGTGGGC-----  
-----CAAAGAACAAGAAGTGGGCATC-----  
-----ACAAAGAACAAGAAGTG-----  
-----AAGAACAAGAAGTGGGCA-----  
-----ACAAAGAACAAGAAGTGGG-----  
-----ATCTGCTGACATGGGGC-----  
-----GCATCTGCTGACATGGGGC-----  
-----CATCTGCTGACATGGGGCC-----  
-----GCATCTGCTGACATGGGGCC-----  
-----GGCATCTGCTGACATGGGGC-----  
-----TCTGCTGACATGGGGGCC-----  
-----CTGGGCTC-----  
-----CTGGGCTC-----  
-----GGGCTC-----  
-----GGGCTC-----  
-----GGCTC-----  
-----GGCTGGGCTC-----

>mmu-mir-669k

| Sequence                                                  | species | len | reads |
|-----------------------------------------------------------|---------|-----|-------|
| CACTTCTCTATATGAATATGCATATACACGCATGCAAACACATTCATAGGAATGGCC | loop    | 18  | 1     |
| CACTTCTCTATATGAATA-----                                   | mirR    | 21  | 7     |
| -----TATGCATATACACGCATGCAA-----                           | mirR    | 20  | 3     |
| -----TATGCATATACACGCATGCA-----                            | mirR    | 20  | 3     |
| -----ATGCATATACACGCATGCAA-----                            | mirR    | 18  | 2     |
| -----GCATATACACGCATGCAA-----                              | mirR    | 19  | 2     |
| -----TGCATATACACGCATGCAA-----                             | mirR    | 18  | 2     |
| -----TATGCATATACACGCATG-----                              | mirR    | 22  | 2     |
| -----TATGCATATACACGCATGCAAA-----                          | mirR    | 21  | 2     |
| -----TGCATATACACGCATGCAAAC-----                           | mirR    | 20  | 1     |
| -----ATATGCATATACACGCATGC-----                            | mirR    | 21  | 1     |
| -----ATGCATATACACGCATGCAAA-----                           | mirR    | 18  | 1     |
| -----ATATGCATATACACGCAT-----                              | mirR    | 22  | 1     |
| -----ATATGCATATACACGCATGCAA-----                          | mirR    | 19  | 1     |
| -----AATATGCATATACACGCAT-----                             | mirR    | 18  | 1     |
| -----AATATGCATATACACGCA-----                              | mirR    | 20  | 1     |
| -----GCATATACACGCATGCAAAC-----                            | mirR    | 19  | 1     |
| -----ATATGCATATACACGCATG-----                             | morR    | 18  | 2     |
| -----ACATTCATAGGAATGGCC-----                              | morR    | 18  | 1     |
| -----AACACATTCATAGGAATG---                                | morR    | 18  | 1     |
| -----CAAACACATTCATAGGAA-----                              | morR    | 19  | 1     |
| -----AAACACATTCATAGGAATG---                               |         |     |       |

>mmu-mir-3071

| Sequence                                                                                       | species | len | reads |
|------------------------------------------------------------------------------------------------|---------|-----|-------|
| CGACATGATAGAACCCTCTGAAGACTCATTGAGACGATGATGGAGCTTAAGAATCCATCATCAAAACAAATGGAGTCCTCCGAGGGCTCATCCA | morL    | 18  | 1     |
| CGACATGATAGAACCCTC-----                                                                        | mirL    | 22  | 2     |
| -----AGACTCATTGAGACGATGATG-----                                                                | mirL    | 18  | 1     |
| -----ACTCATTGAGACGATGA-----                                                                    | mirR    | 22  | 7     |
| -----CCATCATCAAAACAAATGGAGT-----                                                               | mirR    | 23  | 5     |
| -----CCATCATCAAAACAAATGGAGTC-----                                                              | mirR    | 20  | 2     |
| -----ATCCATCATCAAAACAAATG-----                                                                 | mirR    | 22  | 2     |
| -----ATCATCAAAACAAATGGAGTCC-----                                                               | mirR    | 25  | 2     |
| -----TCCATCATCAAAACAAATGGAGTCC-----                                                            | mirR    | 21  | 2     |
| -----AATCCATCATCAAAACAAATG-----                                                                | mirR    | 23  | 2     |
| -----TCCATCATCAAAACAAATGGAGT-----                                                              | mirR    | 20  | 2     |
| -----AATCCATCATCAAAACAAAT-----                                                                 | mirR    | 18  | 1     |
| -----AATCCATCATCAAAACAA-----                                                                   | mirR    | 20  | 1     |
| -----TCCATCATCAAAACAAATGG-----                                                                 | mirR    | 22  | 1     |
| -----AATCCATCATCAAAACAAATGG-----                                                               | mirR    | 23  | 1     |
| -----TCATCAAAACAAATGGAGTCCTC-----                                                              | mirR    | 18  | 1     |
| -----TCCATCATCAAAACAAAT-----                                                                   | mirR    | 23  | 1     |
| -----ATCATCAAAACAAATGGAGTCCT-----                                                              | mirR    | 19  | 1     |
| -----CATCATCAAAACAAATGGA-----                                                                  | morR    | 19  | 1     |
| -----TCCTCCGAGGGCTCATCCA-----                                                                  |         |     |       |

```
-----AGTCCTCCGAGGGCTCATC-- morR 19 1

>mmu-mir-3109
CTCTCTGCCTGCTCCTGTAAATGGATGCGATGGTTCCCATGCTGTTCTGAGGCAGAGCTAGGGCCATCTCATCCAGATACTGTGGAGATGGTACAAGGCGCTTAGCACAAATGGGAAGAGGCTGCCCT species len
--CTCTGCCTGCTCCTGTAAA----- morL 19 2
CTCTCTGCCTGCTCCTGTA----- morL 19 1
--CTCTGCCTGCTCCTGTAA----- morL 18 1
-----AATGGATGCGATGGTTCCCATGC----- mirL 23 5
-----AATGGATGCGATGGTTCCC----- mirL 19 1
-----AATGGATGCGATGGTTCCCATGCT----- mirL 24 1
-----AATGGATGCGATGGTTCCCA----- mirL 20 1
-----GGTACAAGGCGCTTAGCA----- mirR 18 18
-----TGGTACAAGGCGCTTAGCA----- mirR 19 2
-----TGGTACAAGGCGCTTAGC----- mirR 18 1
-----ATGGTACAAGGCGCTTAGC----- mirR 19 1
-----AATGGGAAGAGGCTGCC----- morR 18 1
-----ATGGGAAGAGGCTGCCCT morR 18 1

>mmu-mir-3113
AGCAGCACTAGCATCTCTGGCCCTGGCCCGGGTCTGGCCCTGGTCCGGGTCTGGCCCTGGTCTGGCCCTGGTCTGGTCTGGCCCTGGCCCTGGCCCGGCCCTGGCCCTGGTCTGGCCCTGGA speci
-----TAGCATCTCTGGCCCTGG----- morL
AGCAGCACTAGCATCTCTGGCC----- morL
-----CATCTCTGGCCCTGGCC----- morL
-----ACTAGCATCTCTGGCCCT----- morL
-----CCCGGTCTGGCCCTGG----- mirL
-----CCTGGTCTGGCCCTGGA mirR

>mmu-mir-3074-2
CTGTTCCTGCTGAACTGAGCCAGTGCAGTGAATCAACTGTTTCAGCTCAGTAGGCACGGGAGGCGGAGCCCGGAGAGAG species len reads
---GTTTCCTGCTGAACTGAGCCA----- mirL 20 5
---GTTTCCTGCTGAACTGAGCCAGT----- mirL 22 3
--TGTTTCCTGCTGAACTGAGCCA----- mirL 21 3
-CTGTTCCTGCTGAACTGAGCCA----- mirL 22 3
---GTTTCCTGCTGAACTGAGCCAGTG----- mirL 23 2
---TTCCTGCTGAACTGAGCCA----- mirL 19 1
CCTGTTCCTGCTGAACTG----- mirL 18 1
---TTCCTGCTGAACTGAGCCAGTG----- mirL 22 1
-CTGTTCCTGCTGAACTGA----- mirL 18 1
-CTGTTCCTGCTGAACTGAGCC----- mirL 21 1
---TTCCTGCTGAACTGAGCCAGT----- mirL 21 1
--TGTTTCCTGCTGAACTGAGCCAGT----- mirL 23 1
CCTGTTCCTGCTGAACTGAGCCA----- mirL 23 1
---GTTTCCTGCTGAACTGAGC----- mirL 18 1
---TTCCTGCTGAACTGAGCCA----- mirL 18 1
-----ACTGTTTCAGCTCAGTAGGCAC----- mirR 22 3
-----CTGTTTCAGCTCAGTAGGCAC----- mirR 21 2
```

```

-----TCAACTGTTTCAGCTCAG----- mirR 18 1
-----TGTTTCAGCTCAGTAGGCACG----- mirR 21 1
-----TCAACTGTTTCAGCTCAGTA----- mirR 20 1
-----AGGCGGAGCCCGGAGAGAG morR 19 1
-----CGGGAGGCGGAGCCCGGAG---- morR 19 1

```

>mmu-mir-3112

```

TTCTTGTCATCACAAACATCTAAATGAACAGTGACATAGAAAAGGCAGTCTGCATTTATTCTGGAGCTGCAGTTTGTCTCTTCTTTGTCTCTGTCAGTTGGTTT species len reads
TTCTTGTCATCACAAACATC----- morL 19 4
----GTCATCACAAACATCTAAAT----- morL 19 1
-TCTTGTCATCACAAACATC----- morL 18 1
-TCTTGTCATCACAAACATCTA----- morL 20 1
-----ATGAACAGTGACATAGAA----- mirL 18 3
-----AACAGTGACATAGAAAAG----- mirL 19 1
-----AAATGAACAGTGACATAG----- mirL 18 1
-----TGAACAGTGACATAGAAAA----- mirL 19 1
-----ATGAACAGTGACATAGAAAA----- mirL 20 1
-----AGCTGCAGTTTGTCTCTTC----- mirR 19 12
-----GCTGCAGTTTGTCTCTTCT----- mirR 19 1
-----CTGCAGTTTGTCTCTTCT----- mirR 19 1
-----AGCTGCAGTTTGTCTCTT----- mirR 18 1
-----TCTTTGTCTCTGTCAGTTG---- morR 19 1
-----CTTTGTCTCTGTCAGTTGGT-- morR 20 1
-----TCTTTGTCTCTGTCAGTT----- morR 18 1
-----TGTCTCTGTCAGTTGGTTT morR 19 1

```

>mmu-mir-3096

```

ACAGTTCTTGGCCAAGGATGAGAACTCTAACCTGACAGGATACGCTGTGTGATGGGTTAAAGGATTTACCTGAGGCCAACAGAACAGGCA species len reads
ACAGTTCTTGGCCAAGGAT----- morL 19 1
ACAGTTCTTGGCCAAGGA----- morL 18 1
-----ATGAGAACTCTAACCTGAC----- mirL 19 2
-----GAGAACTCTAACCTGACA----- mirL 18 1
-----ATGAGAACTCTAACCTGACAG----- mirL 21 1
-----AGGATGAGAACTCTAAC----- mirL 18 1
-----CTGTGATGGGTTAAAGGATTT----- mirR 21 4
-----CTGTGATGGGTTAAAGGA----- mirR 18 4
-----CTGTGATGGGTTAAAGGAT----- mirR 19 4
-----TGCTGTGATGGGTTAAAGGATTTACCTGAGGCC----- mirR 33 2
-----TGCTGTGATGGGTTAAAGGATTTACCTG----- mirR 28 1
-----GTGATGGGTTAAAGGAT----- mirR 18 1
-----CTGCTGTGATGGGTTAAAGGATTTACCTGAG----- mirR 31 1
-----TGCTGTGATGGGTTAAAGGATTTACC----- mirR 26 1
-----GCTGTGATGGGTTAAAGGATTTACCTGAGGCC----- mirR 32 1
-----CTGTGATGGGTTAAAGGATTTAC----- mirR 23 1
-----CTGTGATGGGTTAAAGGAT----- mirR 20 1
-----TGATGGGTTAAAGGATTT----- mirR 18 1

```

```
-----CCTGAGGCCAACAGAACA---- morR 18 1
-----TGAGGCCAACAGAACAGGCA morR 20 1
-----ACCTGAGGCCAACAGAAC---- morR 18 1
-----CTGAGGCCAACAGAACAG--- morR 18 1
```

>mmu-mir-1937b-4

```
TCTCTTGGGTGGTCGCGTCAATCCCGGACGAGCCCCAAATGAAAGATCCCCAAAGGGAGATCCTCACTCAAGCCTCGGGATGTGGCGCGGACCCAAGAGAGACGCGGAGACCGAAATGGCGTACACACAAAGCCATTTAA
TCTCTTGGGTGGTCGCGT-----
---CTTGGGTGGTCGCGTCAA-----
-----TCCCGGACGAGCCCCAAATGA-----
-----TCCCGGACGAGCCCCAAATGAA-----
-----CCCGGACGAGCCCCAAATGAAA-----
-----ATCCCGGACGAGCCCCAAATGA-----
-----CGGACGAGCCCCAAATGAAAGATCCCC-----
-----CCCGGACGAGCCCCAAATGAA-----
-----AATCCCGGACGAGCCCCAAATGA-----
-----ATCCCGGACGAGCCCCAAATGAA-----
-----TCCCGGACGAGCCCCAAATGAAA-----
-----CAATCCCGGACGAGCCCCAAA-----
-----TCCCGGACGAGCCCCAAATGAAAGATCCC-----
```

>mmu-mir-669o

```
AGTTGTGTGTGCATGTTTATGTGTGTTTTGAATATACATAACATACACACACACGTATAAACACAAGCACACACACAGACACAAGAATGACACTCATCAAT species len reads
AGTTGTGTGTGCATGTTTATGT----- mirL 22 3
-GTTGTGTGTGCATGTTT----- mirL 18 2
AGTTGTGTGTGCATGTTT----- mirL 18 1
---TGTGTGTGCATGTTTATGT----- mirL 19 1
-----CAAGCACACACACAGACAC----- mirR 21 6
-----AGCACACACACAGACAC----- mirR 19 3
-----ACAAGCACACACACAGAC----- mirR 20 2
-----CACAAGCACACACACA----- mirR 18 1
-----ACACAAGCACACACACAC----- mirR 18 1
-----AAGCACACACACAGACACA----- mirR 21 1
-----ACAAGCACACACACAG----- mirR 18 1
-----CAAGCACACACACAGACACA----- mirR 22 1
-----AGCACACACACAGACACA----- mirR 20 1
-----AGCACACACACAGACA----- mirR 18 1
-----AAGCACACACACAGACAC----- mirR 20 1
-----CACAAGCACACACACAGACAC----- mirR 23 1
-----AAGAATGACACTCATCAA----- morR 18 1
```



```
-----AAGAATGACACTCATCAAT morR 19 1

>mmu-mir-3108
GCTGGACGTGAGACACAACCAGGGTCTCTAAAGCTAGACGTTCCGAGAATTTTTTTATTTCGGCGTCTAGGTCTAGAGTCTCAAGGAAGTGGCCAGTA species len reads
GCTGGACGTGAGACACAA----- morL 18 2
--TGGACGTGAGACACAACCA----- morL 19 1
---GACGTGAGACACAACCAG----- morL 18 1
GCTGGACGTGAGACACAAC----- morL 19 1
---ACGTGAGACACAACCAG----- morL 18 1
--TGGACGTGAGACACAACC----- morL 18 1
-----GTCTCTAAAGCTAGACGTTCC----- mirL 21 3
-----AGGGTCTCTAAAGCTAGACGTT----- mirL 22 3
-----GTCTCTAAAGCTAGACGTTCCGG----- mirL 23 3
-----AGGGTCTCTAAAGCTAGACGTT----- mirL 21 1
-----AGGGTCTCTAAAGCTAGACGTTCC----- mirL 24 1
-----GTCTCTAAAGCTAGACGTTCC----- mirL 20 1
-----AGGGTCTCTAAAGCTAGACG----- mirL 20 1
-----AGGGTCTCTAAAGCTAGAC----- mirL 19 1
-----TCAAGGAAGTGGCCAGTA mirR 18 6
-----GTCTCAAGGAAGTGGCCA--- mirR 18 1

>mmu-mir-3080
AAAGTCCACGGTTTGAGATCTGAAGCGCCTGTTCTTGGATCGTGCCCTGTAGTCATCCTCGGGCAAAGCGCTTGACATCTCTGTGCCTCCTTTCTCGTCTGGAGACCCGAGATGTCACAGACTGAAAAC species
AAAGTCCACGGTTTGAGA----- morL 18 2
--AGTCCACGGTTTGAGATCT----- morL 19 1
---GTCCACGGTTTGAGATCTG----- morL 19 1
--AGTCCACGGTTTGAGATC----- morL 18 1
-----CTGAAGCGCCTGTTCTTG----- mirL 18 7
-----TGAAGCGCCTGTTCTTGGATCG----- mirL 22 5
-----TGAAGCGCCTGTTCTTGGATC----- mirL 21 3
-----TGAAGCGCCTGTTCTTGGAT----- mirL 20 2
-----TCTGAAGCGCCTGTTCTT----- mirL 18 1
-----ATGTCACAGACTGAAAAC- mirR 18 3
-----TGTCACAGACTGAAAAC mirR 18 1
-----GATGTCACAGACTGAAAAC- mirR 19 1

>mmu-mir-3066
GAGTGAGTAGTGTGGTATGTTTTGGTTGCTGTAGATTAAGTAGTTTAATATGATGCTGCCTTAATAGACCGCAACCTGCCTGGCCATGCTCTGGGCTGCGCACAGGGCTTCTCTCAGGGGATCTGCCAG species
GAGTGAGTAGTGTGGTAT----- morL 18 1
---AGTAGTGTGGTATGTTTT----- morL 18 1
---GTAGTGTGGTATGTTTTG----- morL 18 1
---TGAGTAGTGTGGTATGTT----- morL 18 1
-----TTGGTTGCTGTAGATTAAGTAG----- mirL 22 6
-----TTGGTTGCTGTAGATTAAGTAG----- mirL 23 5
-----TGGTTGCTGTAGATTAAGTAG----- mirL 22 1
-----TTGGTTGCTGTAGATTAAGT----- mirL 20 1
```

```
-----TTTGGTTGCTGTAGATTAAGTAGTT----- mirL 25 1
-----TTTTGGTTGCTGTAGATT----- mirL 18 1
-----TTGGTTGCTGTAGATTAAGTAGTTT----- mirL 25 1
-----CTCTCAGGGGATCTGCCAG mirR 19 8
```

>mmu-mir-680-1

```
CAAGGGAGAATTATACAAAGAAGTAAAGTGGGCATCTGCTGACATGGGGGCCAAGTCAGGCGCCAGGAAGCGGGCACTTTGCATCTTATCTCCGGAACATCGATCCTCTTGACAGCCTTGGGTGTCAGGCTGGGCTCA
-----AAAGAAGTAAAGTGGG-----
CAAGGGAGAATTATACAAAGAAGTAAAGTGGGC-----
-----ACAAAGAAGTAAAGTGG-----
-----CAAAGAAGTAAAGTGGG-----
-----ATCTGCTGACATGGGGGC-----
-----GCATCTGCTGACATGGGGGC-----
-----CATCTGCTGACATGGGGGCC-----
-----GGCATCTGCTGACATGGGGGC-----
-----TCTGCTGACATGGGGGCC-----
-----GCATCTGCTGACATGGGGGCC-----
```

>mmu-mir-208a

```
GGCCCTTGCTTACTTCTTTGACGGGTGAGCTTTTGGCCCGGGTTATACCTGACACTCACGTATAAGACGAGCAAAAAGCTTGTGGTCAGAGGAGCTATCATCA species len reads
GGCCCTTGCTTACTTCTCT----- morL 18 1
-----CCTTTGACGGGTGAGCTTT----- mirL 19 3
-----CTTCTTTGACGGGTGAG----- mirL 18 2
-----TTGACGGGTGAGCTTTT----- mirL 18 2
-----TCCTTTGACGGGTGAGCTTT----- mirL 21 1
-----TCCTTTGACGGGTGAGCTT----- mirL 19 1
-----GACGAGCAAAAAGCTTGT----- mirR 18 6
-----AGACGAGCAAAAAGCTTGT----- mirR 19 3
-----TCAGAGGAGCTATCATCA morR 18 5
-----TTGGTCAGAGGAGCTATCA--- morR 19 2
```

>mmu-mir-3070a

```
GATCCTATCCATGATCTCCTGGTGCTACCGTCAGGGGTAGATTC species len reads
-ATCCTATCCATGATCTCC----- loop 18 1
GATCCTATCCATGATCTC----- loop 18 1
-----TGGTGCTACCGTCAGGGGTAGAT-- mirR 23 6
-----TGGTGCTACCGTCAGGGGTAGA--- mirR 22 4
-----TGGTGCTACCGTCAGGGG----- mirR 18 3
-----TGGTGCTACCGTCAGGGGTAG--- mirR 21 2
-----TCCTGGTGCTACCGTCAG----- mirR 18 1
-----GGTGCTACCGTCAGGGGTAG--- mirR 20 1
-----TGGTGCTACCGTCAGGGGTAGATTC mirR 25 1
-----GGTGCTACCGTCAGGGGTAGA--- mirR 21 1
```

```
-----TGGTGCTACCGTCAGGGGT----- mirR 19 1
-----TGCTACCGTCAGGGGTAG---- mirR 18 1
-----TGGTGCTACCGTCAGGGGTAGATT- mirR 24 1
-----GGTGCTACCGTCAGGGGT----- mirR 18 1
```

>mmu-mir-546

```
CAAACTAAACAGGATCTATCATGGTGGCACGGAGTCAGCTAGATGTTGTCTCTTGCTATCCCTGTGCTAGTTCATGTTTTAGAAAGCAAAGTGATACTGGGGAGGAGAGGAGGGCAAGTGAGAGGAGCCAGTGCCTCCTG
CAAACTAAACAGGATCTA-----
-----ATGGTGGCACGGAGTCAGC-----
-----ATGGTGGCACGGAGTCAG-----
-----TCATGGTGGCACGGAGTC-----
-----ATGGTGGCACGGAGTCAGCTAG-----
-----AGTGAGAGGAGCCAGTGCC-----
-----CAAGTGAGAGGAGCCAGT-----CTCCTG
-----GCAAGTGAGAGGAGCCAG-----
-----TGAGAGGAGCCAGTGCCCT-----
-----TCCTG-----
-----CTCCTG-----
-----TG-----
-----GCCTCCTG-----
-----CTCCTG-----
```

>mmu-mir-3474

```
TTCTGACTGGGCCGGGAGCCCTGGGAGGAGACGTGGATTCTTTAGAGTGCATCTGCGTCTTGTTCCAGGTTTCAGCTCGCCTCGA species len reads
-TCCTGACTGGGCCGGGAG----- morL 18 1
TTCTGACTGGGCCGGGA----- morL 18 1
-----CCCTGGGAGGAGACGTGGATT----- mirL 22 5
-----GAGCCCTGGGAGGAGACG----- mirL 18 3
-----CCTGGGAGGAGACGTGGATT----- mirL 21 3
-----CCCTGGGAGGAGACGTGGATT----- mirL 21 2
-----CCCTGGGAGGAGACGTGGATTCT----- mirL 23 1
-----CCCTGGGAGGAGACGTGG----- mirL 18 1
-----CCTGGGAGGAGACGTGGAT----- mirL 19 1
-----CCCTGGGAGGAGACGTGGATTCTT----- mirL 24 1
-----AGTGCATCTGCGTCTTGT----- mirR 18 1
-----GTGCATCTGCGTCTTGT----- mirR 18 1
-----CCAGGTTTCAGCTCGCCTCGA morR 20 1
```

>mmu-mir-3081

```
CTGGGCTGGGGCTCAGACTGGAGCTTGGAGCGGTGAGCTGGACTCGGGCTTGCGCTCCGATCTCTGAGCTGGGCTCTTGCCCGGAATCCCAGCG species len reads
CTGGGCTGGGGCTCAGACT----- mirL 19 1
-----TTGCGCTCCGATCTCTGAGCTG----- mirR 22 4
-----TTGCGCTCCGATCTCTGAGCTGG----- mirR 23 3
-----TGCGCTCCGATCTCTGAGCTG----- mirR 21 3
-----TTGCGCTCCGATCTCTGAGCTGGGCT----- mirR 26 2
-----TTGCGCTCCGATCTCTGAGCTGGGC----- mirR 25 1
```

```

-----CTTGCGCTCCGATCTCTGA----- mirR 19 1
-----TTGCGCTCCGATCTCTGAG----- mirR 19 1
-----TGCGCTCCGATCTCTGAGCTGG----- mirR 22 1
-----CTCTTGCCCCGAATCCCAG-- morR 19 2
-----TGGGCTCTTGCCCCGAAT----- morR 18 1
-----TCTTGCCCCGAATCCCAG-- morR 18 1
-----GCTCTTGCCCCGAATCCCAGCG morR 22 1

```

>mmu-mir-3065

```

AGCTGCCCTCTTCAACAAAATCACTGATGCTGGAGTCACTGTGCACCCACTCAGCACCAGGATATTGTTGGG species len reads
---TGCCCTCTTCAACAAAAT----- morL 18 2
-GCTGCCCTCTTCAACAAA----- morL 19 2
--CTGCCCTCTTCAACAAAAT----- morL 19 1
AGCTGCCCTCTTCAACAA----- morL 18 1
--CTGCCCTCTTCAACAAA----- morL 18 1
---GCCCTCTTCAACAAAATC----- morL 18 1
----CCCTCTTCAACAAAATCA----- morL 18 1
---CCCTCTTCAACAAAATCAC----- morL 19 1
-----CACTGATGCTGGAGTCAC----- mirL 18 3
-----TGATGCTGGAGTCACTGT----- mirL 18 1
-----CTGATGCTGGAGTCACTG----- mirL 18 1
-----ACTCAGCACCAGGATATTGTT--- mirR 21 3
-----CACTCAGCACCAGGATATTGTT--- mirR 22 2
-----TCAGCACCAGGATATTGTTGGG mirR 22 1
-----CCACTCAGCACCAGGATATTGTT--- mirR 23 1

```

>mmu-mir-3089

```

GCTGGTGGCTTGCAACTGAGTTCAGGGACAGCGTGTCTCAGTTTCTCTGTCTGAGCATCTGCTGATCCTGAGCTGTGTTTTAGCTGCAGAAACCC species len reads
GCTGGTGGCTTGCAACTGAGTTC----- morL 23 1
-----CAGGGACAGCGTGTCTCA----- mirL 18 1
-----GGACAGCGTGTCTCAGTT----- mirL 18 1
-----AGCATCTGCTGATCCTGAGCTGT----- mirR 23 5
-----AGCATCTGCTGATCCTGAGC----- mirR 20 4
-----AGCATCTGCTGATCCTGAGCTGTG----- mirR 24 2
-----AGCATCTGCTGATCCTGAGCT----- mirR 21 2
-----AGCATCTGCTGATCCTGAG----- mirR 19 1
-----AGCATCTGCTGATCCTGAGCTG----- mirR 22 1
-----GAGCATCTGCTGATCCTG----- mirR 18 1
-----TGTTTTTAGCTGCAGAAACCC morR 21 1
-----TTTTAGCTGCAGAAACCC morR 18 1

```

>mmu-mir-1893

```

GCTGGCCGGGGCCGTTTCCCAGAGCGGAGAGGTATCTGCTGCGCTGAGATGAGTAAACTGTCGTTTCGGGCGGGGCGCTGGACGCCTCGAAGCCGCTGCCGGT species len reads
---GCCGGGGCCGTTTCCCA----- morL 18 1
GCTGGCCGGGGCCGTTTCCC----- morL 20 1
-----CAGAGCGGAGAGGTATCT----- mirL 18 2

```

```
-----CCCAGAGCGGAGAGGTATC----- mirL 19 1
-----GGCGCGGGCGCTGGACGC----- mirR 18 4
-----GGCGCGGGCGCTGGACGCCTCG----- mirR 22 3
-----GGCGCGGGCGCTGGACGCCT----- mirR 20 1
-----CGCGGGCGCTGGACGCCTCG----- mirR 20 1
-----GGCGCGGGCGCTGGACGCCTCGA----- mirR 23 1
-----GGCGCGGGCGCTGGACGCCT----- mirR 21 1
-----TCGGCGCGGGCGCTGGA----- mirR 18 1
-----GGCGCGGGCGCTGGACGCCTCGAAG----- mirR 25 1
-----CTCGAAGCCCGCTGCCGGT----- morR 18 1
```

>mmu-mir-3110

```
TGGACTGTGGGGCTGTGTTCTGCCTCCCCTGAAGGCTCTGTTGTCACTCTGGGCACTCCATCGGAGGCAGACACTCAACCCACACTTTGCCATCTTCCATGTCCTAGAGCACTGTCTTCCATTTGTGTG species 1
TGGACTGTGGGGCTGTGTT----- morL 19 1
-----TTCTGCCTCCCCTGAAGGCTCTGT----- mirL 24 3
-----TTCTGCCTCCCCTGAAGGCTCT----- mirL 22 2
-----GTTCTGCCTCCCCTGAAG----- mirL 18 2
-----CTGCCTCCCCTGAAGGCT----- mirL 18 1
-----TCTGCCTCCCCTGAAGGCTCT----- mirL 21 1
-----TTCTGCCTCCCCTGAAGGC----- mirL 19 1
-----TCTGCCTCCCCTGAAGGCTC----- mirL 20 1
-----GCACTGTCTTCCATTTGTG----- mirR 19 3
-----CACTGTCTTCCATTTGTG----- mirR 18 1
-----AGCACTGTCTTCCATTTG----- mirR 18 1
-----GCACTGTCTTCCATTTGTGTG----- mirR 21 1
-----GCACTGTCTTCCATTTGTGT----- mirR 20 1
```

>mmu-mir-3092

```
TCTCCCAGTTTCCCTGATCTTTGTGTCTGGGAATGGGGCTGTTTCCCCTCCTGTCCTGCAATCTTATTCCAGCCCAAGGCTGAGAGGACAGGGGAGAGTGAGGAG species len reads
TCTCCCAGTTTCCCTGATC----- mirL 18 5
-----AGGACAGGGGAGAGTGAG----- mirR 18 3
-----AGAGGACAGGGGAGAGTG----- mirR 18 2
-----ACAGGGGAGAGTGAGGAG----- mirR 18 2
-----AGAGGACAGGGGAGAGTGA----- mirR 19 2
-----GAGGACAGGGGAGAGTGAG----- mirR 20 1
-----GAGAGGACAGGGGAGAGTG----- mirR 19 1
-----GAGAGGACAGGGGAGAGT----- mirR 18 1
```

>mmu-mir-1937b-5

```
TCTCTTGGGTGGTTCGCTCAATCCCGACGAGCCCCAAATGAAAGATCCCCAAAGGGAGACCCTCACTCAAGCCTCAGGATGTGGCGCGGACCCAAGAGAGACGCGGAGACCGAAATGACGTACACACAAAGCTATTTAA
TCTCTTGGGTGGTTCGCGT-----
---CTTGGGTGGTTCGCTCAA-----
```

```
>mmu-mir-2861
AGGCTCCTCTGCAGTCCGGCTCCCCCTGGCCTCCCGGAACTACAAGTCCCAGGGGGCTGGCGGCGGGCGGAGACCGGAAGAGGGCGGGCTCGGCACCTCGAGGCCGGAAGTGGCCGTGGAGGCGGA species len
-----CTCTGCAGTCCGGCTCC----- morL 18 1
AGGCTCCTCTGCAGTCC----- morL 18 1
---CTCCTCTGCAGTCCGGC----- morL 18 1
---TCCTCTGCAGTCCGGCT----- morL 18 1
-----TCCCCTGGCCTCCCGGG----- mirL 18 4
-----CCCCTGGCCTCCCGGGAA----- mirL 19 1
-----CCCCTGGCCTCCCGGGA----- mirL 18 1
-----CTCCCCTGGCCTCCCGG----- mirL 18 1
-----AGTGGCCGTGGAGGCGGA mirR 18 5
```

```
>mmu-mir-669p-1
AACATACACACACACACGTATAAA species len reads
--CATACACACACACACGTATA-- mirR 20 8
--CATACACACACACACGTAT--- mirR 19 3
AACATACACACACACACGTATA-- mirR 22 1
---TACACACACACACGTATAAA mirR 20 1
AACATACACACACACACGT----- mirR 19 1
```

```
>mmu-mir-669p-2
AACATACACACACACACGTATAAA species len reads
--CATACACACACACACGTATA-- mirR 20 8
--CATACACACACACACGTAT--- mirR 19 3
AACATACACACACACACGTATA-- mirR 22 1
---TACACACACACACGTATAAA mirR 20 1
AACATACACACACACACGT----- mirR 19 1
```

```
>mmu-mir-3079
GCTCCCAGACAACCTCTGCCAAGCTAAGGACTTTGATCTGATGAGCTAAGCTGGAGTCCCATTCACCTGGCTCCAGGCTCATCAGATGAAAGTCCTTAGCTTAGGTGTGGCCTTTGTTGGAGTAGGTGTGGTGTGGCCTT
--TCCCAGACAACCTCTGCC-----
GCTCCCAGACAACCTCTG-----
-----GCCAAGCTAAGGACTTTG-----
-----AAGCTAAGGACTTTGATC-----
-----TCTGCCAAGCTAAGGACT-----
-----GCCTT-----
-----TGGCCTT-----
-----GCCTT-----
-----GTGGCCTT-----
```

```
>mmu-mir-466o
```

```
ATATACATACATGCACACATAAGACACATATGAGCACATAGAC species len reads
--ATACATACATGCACACATAA----- mirR 20 3
-TATACATACATGCACACATAAG----- mirR 22 2
----CATACATGCACACATAAGAC----- mirR 20 1
--ATACATACATGCACACATA----- mirR 19 1
--ATACATACATGCACACATAAGACA----- mirR 24 1
ATATACATACATGCACAC----- mirR 18 1
-----TAAGACACATATGAGCACAT---- morR 20 1
-----AGACACATATGAGCACATAG-- morR 20 1
-----ACATATGAGCACATAGAC morR 18 1
```

>mmu-mir-466p

```
TATGTGTGTGTACATGTGTGTGAATATGATGATATATACATACACGCACACATAAGACACATATGAGCACACAGACACACAGGAATGGCACTCACTCATCGATCTAT species len reads
TATGTGTGTGTACATGTACATG----- mirL 22 1
-----ACACAGACACACAGGAATG----- mirR 19 4
-----ACAGACACACAGGAATGG----- mirR 18 1
-----GCACACAGACACACAGGA----- mirR 18 1
-----CACACAGACACACAGGAATGG----- mirR 21 1
-----ACAGACACACAGGAATGGC----- mirR 19 1
-----GGCACTCACTCATCGATCTAT morR 21 2
-----GCACTCACTCATCGATCT-- morR 18 1
```

>mmu-mir-3073

```
TCACAGTTGGCGCCAGCCCTAGAGTCTAGATGGGTTGATGTCCACTGTGACCATAGT species len reads
TCACAGTTGGCGCCAGCC----- mirL 18 2
-----TAGAGTCTAGATGGGTTG----- loop 18 2
-----CTAGAGTCTAGATGGGTTG----- loop 19 1
-----GCCCTAGAGTCTAGATGG----- loop 18 1
-----CCCTAGAGTCTAGATGGGT----- loop 19 1
-----TTGATGTCCACTGTGACCATAGT mirR 23 3
-----TTGATGTCCACTGTGACC----- mirR 18 1
-----ATGTCCACTGTGACCATA-- mirR 18 1
```

>mmu-mir-669a-3

```
ACATGTATAAACGCAAGCACAC species len reads
---TGTATAAACGCAAGCACAC mirR 19 6
ACATGTATAAACGCAAGC---- mirR 18 2
--ATGTATAAACGCAAGCACA- mirR 19 1
---TGTATAAACGCAAGCACA- mirR 18 1
--ATGTATAAACGCAAGCAC-- mirR 18 1
```

>mmu-mir-3063

```
AATGAGTGGGAATCAGGGCATTGGGCTGGCTGGAGATCAGGTTTGCACACTGTCTTGAGAACAATGTTCCAGTGAGGAATCCTGATCTCTCGCCCCAATTGAGCCAGCTGGCCACAGCCCACCCCTTGG species
AATGAGTGGGAATCAGGG----- morL 18
-----GCATTTGGGCTGGCTGGA----- mirL 19
-----TGGCCACAGCCCACCCCT--- mirR 18
```

C:\Documents and Settings\hong\Desktop\Hippocampus-total RNA.txt

```
-----CTGGCCACAGCCCACCCCTT-- mirR 20
-----GGCCACAGCCCACCCCTT-- mirR 18
-----CTGGCCACAGCCCACCC-- mirR 18
-----GCTGGCCACAGCCCACCCCT-- mirR 20
-----CCACAGCCCACCCCTTGG mirR 18
-----GCCACAGCCCACCCCTTG- mirR 18
```

```
>mmu-mir-3075
AGCAGCCAAGGACAAGTTACCTCTTGTCTTCTATCCTTGGCCTTCTAGGTGTCCAAG species len reads
AGCAGCCAAGGACAAGTT----- mirL 18 1
-----CTCTTGTCTTCTATCCTT----- mirR 18 8
-----GGCCTTCTAGGTGTCCA-- morR 18 1
-----GCCTTCTAGGTGTCCAAG morR 19 1
```

```
>mmu-mir-669a-2
ACGCAAGCACACACACAGACACAGGAATGGCATTTCATTGACCC species len reads
---CAAGCACACACACAGACAC----- mirR 19 2
---AAGCACACACACAGACAC----- mirR 18 1
ACGCAAGCACACACACAGAG----- mirR 19 1
---AGCACACACACAGACACAG----- mirR 19 1
--GCAAGCACACACACAGAC----- mirR 18 1
---CAAGCACACACACAGACACA----- mirR 20 1
---CAAGCACACACACAGACA----- mirR 18 1
---AGCACACACACAGACACA----- mirR 18 1
-----AATGGCATTTCATTGACCC morR 18 1
```

```
>mmu-mir-669a-12
ATACACAGATACAGGAATGGCA species len reads
--ACACAGATACAGGAATGG-- mirR 18 3
ATACACAGATACAGGAAT---- mirR 18 1
---CACAGATACAGGAATGGC- mirR 18 1
---CACAGATACAGGAATGGCA mirR 19 1
ATACACAGATACAGGAATGG-- mirR 20 1
```

```
>mmu-mir-467a-2
TATGTGCCTGTGTGCGTAAGTGCCTGCATGTATATGCGTGTATATTTTATGCATATACATACACACCTACACACATGCACACAGACATGCGGGAATGGCACTCAG species len reads
TATGTGCCTGTGTGCGTAAGTGC----- mirL 22 1
---GTGCCTGTGTGCGTAAGTGC----- mirL 20 1
-----TGCGGGAATGGCACTCAG mirR 19 2
-----ATGCGGGAATGGCACTCA-- mirR 18 1
-----ACATGCGGGAATGGCACTC--- mirR 19 1
```

```
>mmu-mir-467a-9
TATGTGCCTGTGTGCGTAAGTGCCTGCATGTATATGCGTGTATATTTTATGCATATACATACACACCTACACACATGCACACAGACATGCGGGAATGGCCCTCACGGATCCATTTGAATGAAATGTGA species
TATGTGCCTGTGTGCGTAAGTGC----- mirL 22
---GTGCCTGTGTGCGTAAGTGC----- mirL 20
```



```
-----CCATTTGAATGAAATGTG- mirR 18
-----CCATTTGAATGAAATGTGA mirR 19

>mmu-mir-467a-4
TATGTGCCTGTGTGCGTAAGTGCCTGCATGTATATGCGTGTATATTTTATGCATATACATACACACCTACACACACATGCACACAGACATGCGGGAATGGCCCTCACGGATCCATTTGAATGAAATGTGA species
TATGTGCCTGTGTGCGTAAGTG----- mirL 22
---GTGCCTGTGTGCGTAAGTGC----- mirL 20
-----CCATTTGAATGAAATGTG- mirR 18
-----CCATTTGAATGAAATGTGA mirR 19

>mmu-mir-467a-7
TATGTGCCTGTGTGCGTAAGTGCCTGCATGTATATGCGTGTATATTTTATGCATATACATACACACCTACACACACATGCACACAGACATGCGGGAATGGCCCTCACGGATCCATTTGAATGAAATGTGA species
TATGTGCCTGTGTGCGTAAGTG----- mirL 22
---GTGCCTGTGTGCGTAAGTGC----- mirL 20
-----CCATTTGAATGAAATGTG- mirR 18
-----CCATTTGAATGAAATGTGA mirR 19

>mmu-mir-466a
TATGTGAATATGATATCCATATACATACACGCAC species len reads
TATGTGAATATGATATCC----- loop 18 1
-----CCATATACATACACGCAC mirR 18 2
-----ATCCATATACATACACGCA- mirR 19 1

>mmu-mir-467a-1
CCCTCACGGTCCATTTGAA species len reads
-CCTCACGGTCCATTTGAA mirR 18 2
CCCTCACGGTCCATTTGA- mirR 18 1

>mmu-mir-467a-3
GCCTTCACGGATCCATTTG species len reads
GCCTTCACGGATCCATTTG mirR 19 1
-CCTTCACGGATCCATTTG mirR 18 1

>mmu-mir-467a-6
GCCTTCACGGATCCATTTG species len reads
GCCTTCACGGATCCATTTG mirR 19 1
-CCTTCACGGATCCATTTG mirR 18 1

>mmu-mir-467a-5
TATGTGCCTGTGTGCGTAAGTGC species len reads
TATGTGCCTGTGTGCGTAAGTG- mirL 22 1
---GTGCCTGTGTGCGTAAGTGC mirL 20 1

>mmu-mir-669a-5
AATCCCTTAGAATGATAAGT species len reads
-ATCCCTTAGAATGATAAGT mirR 19 1
```

AATCCCTTAGAATGATAA-- mirR 18 1

>mmu-mir-467a-8

TATGTGCCTGTGTGCGTAAGTGC species len reads

TATGTGCCTGTGTGCGTAAGTGC- mirL 22 1

---GTGCCTGTGTGCGTAAGTGC mirL 20 1

>mmu-mir-467a-10

GCCTTCACGGATCCATTTG species len reads

GCCTTCACGGATCCATTTG mirR 19 1

-CCTTCACGGATCCATTTG mirR 18 1

>mmu-mir-466b-2

TGTACATGTACATGTCTG species len reads

TGTACATGTACATGTCTG mirL 18 2

>mmu-mir-466b-4

TTTGAGTGATAAGTGACT species len reads

TTTGAGTGATAAGTGACT mirR 18 1

>mmu-mir-669a-1

TTGAATGATAAGTGATGTA species len reads

TTGAATGATAAGTGATGTA mirR 19 1

>mmu-mir-466b-6

TTTGAGTGATAAGTGACT species len reads

TTTGAGTGATAAGTGACT mirR 18 1

>mmu-mir-466b-5

TTTGAGTGATAAGTGACT species len reads

TTTGAGTGATAAGTGACT mirR 18 1

>mmu-mir-125b-2

| Sequence                                                                                                            | species | len | reads   |
|---------------------------------------------------------------------------------------------------------------------|---------|-----|---------|
| CCTGCATCACACGAGACTTTGCCTAGTCCCTGAGACCCTAACTTGTGAGGTATTTTAGTAACATCACAAAGTCAGGTTCTTGGGACCTAGGCGGAGGGATAACCAGCAGCTTGGG | morL    | 19  | 112     |
| -----CACACGAGACTTTGCCTAG-----                                                                                       | morL    | 20  | 59      |
| -----TCACACGAGACTTTGCCTAG-----                                                                                      | morL    | 18  | 38      |
| -----ACACGAGACTTTGCCTAG-----                                                                                        | morL    | 18  | 16      |
| -----ATCACACGAGACTTTGCC-----                                                                                        | morL    | 21  | 6       |
| -----ATCACACGAGACTTTGCCTAG-----                                                                                     | morL    | 22  | 4       |
| -----CATCACACGAGACTTTGCCTAG-----                                                                                    | morL    | 23  | 2       |
| -----GCATCACACGAGACTTTGCCTAG-----                                                                                   | morL    | 26  | 2       |
| CCTGCATCACACGAGACTTTGCCTAG-----                                                                                     | morL    | 20  | 1       |
| -----CACACGAGACTTTGCCTAGT-----                                                                                      | morL    | 18  | 1       |
| -----CACACGAGACTTTGCCTA-----                                                                                        | morL    | 22  | 1       |
| -----ATCACACGAGACTTTGCCTAGT-----                                                                                    | morL    | 19  | 1       |
| -----CATCACACGAGACTTTGCC-----                                                                                       | mirL    | 22  | 6849750 |
| -----TCCCTGAGACCCTAACTTGTGA-----                                                                                    | mirL    | 21  | 678378  |
| -----TCCCTGAGACCCTAACTTGTG-----                                                                                     | mirL    | 21  | 277403  |
| -----CCCTGAGACCCTAACTTGTGA-----                                                                                     | mirL    | 23  | 146397  |
| -----TCCCTGAGACCCTAACTTGTGAG-----                                                                                   | mirL    | 20  | 132922  |
| -----TCCCTGAGACCCTAACTTGT-----                                                                                      | mirL    | 24  | 34903   |
| -----TCCCTGAGACCCTAACTTGTGAGG-----                                                                                  | mirL    | 20  | 26686   |
| -----CCCTGAGACCCTAACTTGTG-----                                                                                      | mirL    | 19  | 13899   |
| -----TCCCTGAGACCCTAACTTG-----                                                                                       | mirL    | 22  | 7824    |
| -----CCCTGAGACCCTAACTTGTGAG-----                                                                                    | mirL    | 19  | 3999    |
| -----CCCTGAGACCCTAACTTGT-----                                                                                       | mirL    | 23  | 2077    |
| -----CCCTGAGACCCTAACTTGTGAGG-----                                                                                   | mirL    | 18  | 1672    |
| -----TCCCTGAGACCCTAACTT-----                                                                                        | mirL    | 20  | 1185    |
| -----CCTGAGACCCTAACTTGTGA-----                                                                                      | mirL    | 18  | 555     |
| -----CCCTGAGACCCTAACTTG-----                                                                                        | mirL    | 19  | 336     |
| -----CTGAGACCCTAACTTGTGA-----                                                                                       | mirL    | 23  | 311     |
| -----GTCCCTGAGACCCTAACTTGTGA-----                                                                                   | mirL    | 22  | 195     |
| -----GTCCCTGAGACCCTAACTTGTG-----                                                                                    | mirL    | 19  | 163     |
| -----CCTGAGACCCTAACTTGTG-----                                                                                       | mirL    | 24  | 102     |
| -----CCCTGAGACCCTAACTTGTGAGG-----                                                                                   | mirL    | 18  | 69      |
| -----CTGAGACCCTAACTTGTG-----                                                                                        | mirL    | 21  | 38      |
| -----CCTGAGACCCTAACTTGTGAG-----                                                                                     | mirL    | 24  | 31      |
| -----AGTCCCTGAGACCCTAACTTGTGA-----                                                                                  | mirL    | 18  | 24      |
| -----CCTGAGACCCTAACTTGT-----                                                                                        | mirL    | 24  | 22      |
| -----GTCCCTGAGACCCTAACTTGTGAG-----                                                                                  | mirL    | 22  | 21      |
| -----CTGAGACCCTAACTTGTGAGG-----                                                                                     | mirL    | 22  | 19      |
| -----CTGAGACCCTAACTTGTGAG-----                                                                                      | mirL    | 20  | 17      |
| -----GTCCCTGAGACCCTAACTTGTGAGG-----                                                                                 | mirL    | 25  | 11      |
| -----GTCCCTGAGACCCTAACTTGT-----                                                                                     | mirL    | 21  | 9       |
| -----AGTCCCTGAGACCCTAACTTGT-----                                                                                    | mirL    | 22  | 8       |
| -----CTGAGACCCTAACTTGTGAGG-----                                                                                     | mirL    | 21  | 7       |
| -----AGTCCCTGAGACCCTAACTTGTG-----                                                                                   | mirL    | 23  | 6       |

```

-----AGTCCCTGAGACCCTAAC----- mirL 18 3
-----GTCCCTGAGACCCTAACT----- mirL 18 3
-----GTCCCTGAGACCCTAACTTG----- mirL 20 2
-----AGTCCCTGAGACCCTAACTTG----- mirL 21 2
-----TAGTCCCTGAGACCCTAACTTGTG----- mirL 24 2
-----CTGAGACCCTAACTTGTGAGGTA----- mirL 23 2
-----AGTCCCTGAGACCCTAACTTGTGAGG----- mirL 26 2
-----CCTGAGACCCTAACTTGTGAGGTA----- mirL 24 1
-----AGTCCCTGAGACCCTAACT----- mirL 19 1
-----GGTATTTTAGTAACATCA----- loop 18 18
-----AGGTATTTTAGTAACATCA----- loop 19 15
-----TCACAAGTCAGGTTCTTGGGAC----- mirR 22 1082
-----ACAAGTCAGGTTCTTGGGACCT----- mirR 22 975
-----ACAAGTCAGGTTCTTGGGACC----- mirR 21 471
-----ACAAGTCAGGTTCTTGGGACCTAG----- mirR 24 123
-----TCACAAGTCAGGTTCTTGGGACC----- mirR 23 112
-----ACAAGTCAGGTTCTTGGGAC----- mirR 20 100
-----TCACAAGTCAGGTTCTTGGGA----- mirR 21 97
-----ACAAGTCAGGTTCTTGGGACCTA----- mirR 23 88
-----ATCACAAGTCAGGTTCTTGGGA----- mirR 22 82
-----ATCACAAGTCAGGTTCTTGGGACC----- mirR 24 74
-----ACAAGTCAGGTTCTTGGGACCTAGG----- mirR 25 51
-----ATCACAAGTCAGGTTCTTGGG----- mirR 21 48
-----ACAAGTCAGGTTCTTGGGA----- mirR 19 33
-----ATCACAAGTCAGGTTCTTGGGAC----- mirR 23 28
-----TCACAAGTCAGGTTCTTGGGACCTA----- mirR 25 15
-----CAAGTCAGGTTCTTGGGACCT----- mirR 21 14
-----CACAAAGTCAGGTTCTTGGGAC----- mirR 21 13
-----ATCACAAGTCAGGTTCTTGGGACCT----- mirR 25 12
-----TCACAAGTCAGGTTCTTG----- mirR 18 12
-----CACAAAGTCAGGTTCTTGGGACC----- mirR 22 8
-----CACAAAGTCAGGTTCTTGGGACCT----- mirR 23 8
-----ATCACAAGTCAGGTTCTTGG----- mirR 20 8
-----ATCACAAGTCAGGTTCTTGGGACCTA----- mirR 26 8
-----TCACAAGTCAGGTTCTTGGGACCT----- mirR 24 7
-----TCACAAGTCAGGTTCTTGGG----- mirR 20 5
-----CACAAAGTCAGGTTCTTGGGACCTAG----- mirR 25 5
-----CACAAAGTCAGGTTCTTGGG----- mirR 19 3
-----CATCACAAGTCAGGTTCTTGG----- mirR 21 3
-----CACAAAGTCAGGTTCTTGGGA----- mirR 20 2
-----ACATCACAAGTCAGGTTCT----- mirR 18 1
-----CAAGTCAGGTTCTTGGGACC----- mirR 20 1
-----CATCACAAGTCAGGTTCTTGGGA----- mirR 23 1
-----CAAGTCAGGTTCTTGGGACCTAG----- mirR 23 1
-----CACAAAGTCAGGTTCTTGGGACCTA----- mirR 24 1
-----AGCGGAGGGGATACCAGCA----- morR 19 3

```

-----AGGCGGAGGGATACCAGCAGCTTGGG morR 26 1  
 -----ACCTAGGCGGAGGGATAC----- morR 18 1

>mmu-mir-125b-1

| Species | len | reads   |
|---------|-----|---------|
| morL    | 19  | 51      |
| morL    | 18  | 43      |
| morL    | 20  | 30      |
| morL    | 20  | 4       |
| morL    | 19  | 3       |
| morL    | 21  | 2       |
| morL    | 21  | 2       |
| morL    | 19  | 2       |
| morL    | 18  | 1       |
| morL    | 20  | 1       |
| morL    | 18  | 1       |
| mirL    | 22  | 6849747 |
| mirL    | 21  | 678378  |
| mirL    | 21  | 277403  |
| mirL    | 23  | 149749  |
| mirL    | 20  | 132922  |
| mirL    | 20  | 26686   |
| mirL    | 24  | 15158   |
| mirL    | 19  | 13899   |
| mirL    | 22  | 11125   |
| mirL    | 19  | 3999    |
| mirL    | 18  | 1672    |
| mirL    | 23  | 1438    |
| mirL    | 20  | 1185    |
| mirL    | 18  | 555     |
| mirL    | 19  | 336     |
| mirL    | 23  | 311     |
| mirL    | 22  | 195     |
| mirL    | 19  | 163     |
| mirL    | 18  | 69      |
| mirL    | 24  | 64      |
| mirL    | 21  | 59      |
| mirL    | 22  | 31      |
| mirL    | 24  | 31      |
| mirL    | 18  | 24      |
| mirL    | 24  | 17      |
| mirL    | 20  | 14      |
| mirL    | 22  | 13      |
| mirL    | 21  | 13      |
| mirL    | 21  | 9       |
| mirL    | 22  | 8       |

```

-----AGTCCCTGAGACCCTAACTTGTG----- mirL 23 6
-----CTGAGACCCTAACTTGTGATG----- mirL 21 5
-----CCTGAGACCCTAACTTGTGATGTT----- mirL 24 4
-----AGTCCCTGAGACCCTAAC----- mirL 18 3
-----GTCCCTGAGACCCTAACT----- mirL 18 3
-----CAGTCCCTGAGACCCTAACTTGTG----- mirL 24 2
-----GTCCCTGAGACCCTAACTTG----- mirL 20 2
-----GTCCCTGAGACCCTAACTTGTGATG----- mirL 25 2
-----AGTCCCTGAGACCCTAACTTG----- mirL 21 2
-----CCTGAGACCCTAACTTGTGATGTTTAC----- mirL 27 1
-----CTGAGACCCTAACTTGTGATGTT----- mirL 23 1
-----AGTCCCTGAGACCCTAACT----- mirL 19 1
-----TGTTTACCGTTTAAATCC----- loop 18 58
-----TGTTTACCGTTTAAATCCA----- loop 19 2
-----GTTTACCGTTTAAATCCA----- loop 18 1
-----ACGGGTTAGGCTCTTGGGAGCT----- mirR 22 2162
-----ACGGGTTAGGCTCTTGGGAGC----- mirR 21 1050
-----ACGGGTTAGGCTCTTGGGAGCTG----- mirR 23 1033
-----CACGGGTTAGGCTCTTGGGAGC----- mirR 22 408
-----ACGGGTTAGGCTCTTGGGAG----- mirR 20 405
-----CACGGGTTAGGCTCTTGGGAGCTG----- mirR 24 246
-----ACGGGTTAGGCTCTTGGGAGCTGC----- mirR 24 216
-----ACGGGTTAGGCTCTTGGGA----- mirR 19 185
-----TCCACGGGTTAGGCTCTTGGGA----- mirR 22 163
-----CACGGGTTAGGCTCTTGGGA----- mirR 20 130
-----TCCACGGGTTAGGCTCTTGGGAGC----- mirR 24 121
-----CACGGGTTAGGCTCTTGGGAG----- mirR 21 119
-----CACGGGTTAGGCTCTTGGGAGCT----- mirR 23 117
-----TCCACGGGTTAGGCTCTTGGGAG----- mirR 23 95
-----ACGGGTTAGGCTCTTGGGAGCTGCG----- mirR 25 65
-----CACGGGTTAGGCTCTTGGG----- mirR 19 31
-----TCCACGGGTTAGGCTCTTGGGAGCT----- mirR 25 24
-----TCCACGGGTTAGGCTCTTGG----- mirR 20 19
-----TCCACGGGTTAGGCTCTTGGG----- mirR 21 18
-----CACGGGTTAGGCTCTTGGGAGCTGC----- mirR 25 17
-----CGGGTTAGGCTCTTGGGAGCT----- mirR 21 11
-----TCCACGGGTTAGGCTCTTGGGAGCTG----- mirR 26 11
-----CCACGGGTTAGGCTCTTGGGAG----- mirR 22 9
-----CCACGGGTTAGGCTCTTGGGAGC----- mirR 23 6
-----GGGTTAGGCTCTTGGGAGCT----- mirR 20 3
-----CCACGGGTTAGGCTCTTGGG----- mirR 20 2
-----CCACGGGTTAGGCTCTTGGGA----- mirR 21 2
-----CCACGGGTTAGGCTCTTGGGAGCT----- mirR 24 1
-----CCACGGGTTAGGCTCTTGG----- mirR 19 1
-----GCGGGTCGTGCCTTTGCATCG----- morR 21 23
-----GCGGGTCGTGCCTTTGCATCGCTGAAGGAAC morR 31 11

```

|                                                                                                                              |         |     |       |
|------------------------------------------------------------------------------------------------------------------------------|---------|-----|-------|
| -----GCGGGTCGTGCCTTTGCA-----                                                                                                 | morR    | 18  | 6     |
| -----GCGGGTCGTGCCTTTGCATCGCTGAA-----                                                                                         | morR    | 26  | 4     |
| -----GCTGCGGGTCGTGCCTTT-----                                                                                                 | morR    | 18  | 2     |
| -----GCGGGTCGTGCCTTTGCATCGCTG-----                                                                                           | morR    | 24  | 2     |
| -----GCGGGTCGTGCCTTTGCATC-----                                                                                               | morR    | 20  | 1     |
| -----GCGGGTCGTGCCTTTGCAT-----                                                                                                | morR    | 19  | 1     |
| -----CTGCGGGTCGTGCCTTTG-----                                                                                                 | morR    | 18  | 1     |
| -----CGGGTCGTGCCTTTGCAT-----                                                                                                 | morR    | 18  | 1     |
| <br>                                                                                                                         |         |     |       |
| >mmu-mir-24-2                                                                                                                |         |     |       |
| AGGGCTCTGCCTCTCTCCGGGCTCCGCCTCCCGTGCCTACTGAGCTGAAACAGTTGATTCCAGTGCCTGGCTCAGTTCAGCAGGAACAGGAGTCCAGCCCCCTAGGAGCTGGCAACCCTGCAGA | species | len | r     |
| -----CTCTCCGGGCTCCGCCTCCC-----                                                                                               | morL    | 20  | 142   |
| -----TCTCTCCGGGCTCCGCCTCCC-----                                                                                              | morL    | 21  | 32    |
| -----TCTCTCCGGGCTCCGCCTCCC-----                                                                                              | morL    | 19  | 28    |
| -----CTCTCCGGGCTCCGCCTCCCG-----                                                                                              | morL    | 21  | 20    |
| -----CTCTCCGGGCTCCGCCTCC-----                                                                                                | morL    | 19  | 17    |
| -----TCTCTCCGGGCTCCGCCTCCCG-----                                                                                             | morL    | 22  | 8     |
| -----CTCCGGGCTCCGCCTCCC-----                                                                                                 | morL    | 18  | 8     |
| -----GCCTCTCTCCGGGCTCCGCCTCCC-----                                                                                           | morL    | 24  | 5     |
| -----CTCTCCGGGCTCCGCCTCCCGT-----                                                                                             | morL    | 22  | 3     |
| -----CTCTCTCCGGGCTCCGCCTCCC-----                                                                                             | morL    | 22  | 3     |
| AGGGCTCTGCCTCTCTCCGGGCTCCGCCTCCC-----                                                                                        | morL    | 32  | 2     |
| -----CGGGCTCCGCCTCCCGTG-----                                                                                                 | morL    | 18  | 2     |
| -----CTCCGGGCTCCGCCTCCCG-----                                                                                                | morL    | 19  | 2     |
| -----CCGGGCTCCGCCTCCCGTG-----                                                                                                | morL    | 19  | 1     |
| -----TCTCCGGGCTCCGCCTCC-----                                                                                                 | morL    | 18  | 1     |
| -----TCTCCGGGCTCCGCCTCCCG-----                                                                                               | morL    | 20  | 1     |
| -----CTCTCCGGGCTCCGCCTCC-----                                                                                                | morL    | 18  | 1     |
| -----TCCGGGCTCCGCCTCCCGT-----                                                                                                | morL    | 19  | 1     |
| -----TCTCTCCGGGCTCCGCCT-----                                                                                                 | morL    | 18  | 1     |
| -----CCTCTCTCCGGGCTCCGCCTCCCG-----                                                                                           | morL    | 24  | 1     |
| -----CCGGGCTCCGCCTCCCGT-----                                                                                                 | morL    | 18  | 1     |
| -----CTCTCTCCGGGCTCCGCCTCCCG-----                                                                                            | morL    | 23  | 1     |
| -----GTGCCTACTGAGCTGAAACAGT-----                                                                                             | mirL    | 22  | 72713 |
| -----GTGCCTACTGAGCTGAAACAG-----                                                                                              | mirL    | 21  | 11946 |
| -----GTGCCTACTGAGCTGAAACAGTT-----                                                                                            | mirL    | 23  | 2828  |
| -----TGCCTACTGAGCTGAAACAGT-----                                                                                              | mirL    | 21  | 1743  |
| -----GTGCCTACTGAGCTGAAACA-----                                                                                               | mirL    | 20  | 1249  |
| -----GTGCCTACTGAGCTGAAACAGTTG-----                                                                                           | mirL    | 24  | 832   |
| -----GTGCCTACTGAGCTGAAAC-----                                                                                                | mirL    | 19  | 560   |
| -----TGCCTACTGAGCTGAAACAGTT-----                                                                                             | mirL    | 22  | 460   |
| -----GTGCCTACTGAGCTGAAA-----                                                                                                 | mirL    | 18  | 249   |
| -----CGTGCCTACTGAGCTGAAACAGT-----                                                                                            | mirL    | 23  | 132   |
| -----CGTGCCTACTGAGCTGAAACAG-----                                                                                             | mirL    | 22  | 120   |
| -----GCCTACTGAGCTGAAACAGT-----                                                                                               | mirL    | 20  | 71    |
| -----TGCCTACTGAGCTGAAACAGTTG-----                                                                                            | mirL    | 23  | 57    |

```

-----CCTACTGAGCTGAAACAGT----- mirL 19 37
-----TGCCTACTGAGCTGAAACAG----- mirL 20 31
-----CGTGCCTACTGAGCTGAAACA----- mirL 21 23
-----TGCCTACTGAGCTGAAACA----- mirL 19 13
-----GCCTACTGAGCTGAAACAGTT----- mirL 21 11
-----CGTGCCTACTGAGCTGAAA----- mirL 19 6
-----GCCTACTGAGCTGAAACAGTTG----- mirL 22 5
-----GCCTACTGAGCTGAAACAG----- mirL 19 4
-----CGTGCCTACTGAGCTGAAAC----- mirL 20 4
-----TGCCTACTGAGCTGAAAC----- mirL 18 3
-----CCTACTGAGCTGAAACAGTT----- mirL 20 2
-----GCCTACTGAGCTGAAACA----- mirL 18 2
-----CGTGCCTACTGAGCTGAA----- mirL 18 2
-----CGTGCCTACTGAGCTGAAACAGTT----- mirL 24 1
-----CCGTGCCTACTGAGCTGAAACAGT----- mirL 24 1
-----GCCTACTGAGCTGAAACAGTTGA----- mirL 23 1
-----TGCCTACTGAGCTGAAACAGTTGA----- mirL 24 1
-----GCCTACTGAGCTGAAACAGTTGAT----- mirL 24 1
-----GTTGATTCCAGTGCCTG----- loop 18 1
-----TTGATTCCAGTGCCTGG----- loop 18 1
-----TGGCTCAGTTCAGCAGGAACAG----- mirR 22 2393791
-----TGGCTCAGTTCAGCAGGAACAGG----- mirR 23 1953214
-----TGGCTCAGTTCAGCAGGAACA----- mirR 21 301932
-----GGCTCAGTTCAGCAGGAACAGG----- mirR 22 167939
-----TGGCTCAGTTCAGCAGGAACAGGA----- mirR 24 136399
-----TGGCTCAGTTCAGCAGGAAC----- mirR 20 110914
-----GGCTCAGTTCAGCAGGAACAG----- mirR 21 77729
-----TGGCTCAGTTCAGCAGGAACAGGAG----- mirR 25 41895
-----TGGCTCAGTTCAGCAGGA----- mirR 19 22401
-----GGCTCAGTTCAGCAGGAACAGGA----- mirR 23 12667
-----GCTCAGTTCAGCAGGAACAGGA----- mirR 22 10636
-----GGCTCAGTTCAGCAGGAACA----- mirR 20 8816
-----GCTCAGTTCAGCAGGAACAGG----- mirR 21 6282
-----GGCTCAGTTCAGCAGGAACAGGAG----- mirR 24 3597
-----CTGGCTCAGTTCAGCAGGAACAGG----- mirR 24 2284
-----GGCTCAGTTCAGCAGGAAC----- mirR 19 2122
-----GCTCAGTTCAGCAGGAACAGGAG----- mirR 23 1896
-----CTGGCTCAGTTCAGCAGGAACAG----- mirR 23 1502
-----GCTCAGTTCAGCAGGAACAG----- mirR 20 1135
-----CTGGCTCAGTTCAGCAGGAACA----- mirR 22 806
-----GGCTCAGTTCAGCAGGA----- mirR 18 641
-----GCTCAGTTCAGCAGGAACAGGAGT----- mirR 24 441
-----CTGGCTCAGTTCAGCAGGAAC----- mirR 21 339
-----GCTCAGTTCAGCAGGAACA----- mirR 19 205
-----CTGGCTCAGTTCAGCAGGAACAGGA----- mirR 25 188
-----CTCAGTTCAGCAGGAACAG----- mirR 19 154

```



```

-----CTCAGTTCAGCAGGAACAGG----- mirR 20 76
-----CTGGCTCAGTTCAGCAGGAACAGGAG----- mirR 26 63
-----CTGGCTCAGTTCAGCAGGAA----- mirR 20 53
-----GCTCAGTTCAGCAGGAACAGGAGTC----- mirR 25 48
-----ACTGGCTCAGTTCAGCAGGAACAG----- mirR 24 39
-----CTCAGTTCAGCAGGAACA----- mirR 18 28
-----CACTGGCTCAGTTCAGCAGGAACAG----- mirR 25 23
-----CTCAGTTCAGCAGGAACAGGA----- mirR 21 22
-----ACTGGCTCAGTTCAGCAGGAACA----- mirR 23 20
-----CTCAGTTCAGCAGGAACAGGAG----- mirR 22 10
-----ACTGGCTCAGTTCAGCAGGAACAGG----- mirR 25 6
-----ACTGGCTCAGTTCAGCAGGAAC----- mirR 22 3
-----CACTGGCTCAGTTCAGCAGGAAC----- mirR 23 2
-----CACTGGCTCAGTTCAGCAGGA----- mirR 21 1
-----CTCAGTTCAGCAGGAACAGGAGT----- mirR 23 1
-----CACTGGCTCAGTTCAGCAGGAACA----- mirR 24 1
-----ACTGGCTCAGTTCAGCAGGAACAGGA----- mirR 26 1
-----CACTGGCTCAGTTCAGCA----- mirR 18 1
-----GAGTCCAGCCCCCTAGGAGCTG----- morR 22 8
-----GAGTCCAGCCCCCTAGGAGCTGGCAACCC----- morR 29 7
-----GAGTCCAGCCCCCTAGGAGC----- morR 20 7
-----GAGTCCAGCCCCCTAGGAGCTGGCAACCCTGCAGA morR 35 3
-----GAGTCCAGCCCCCTAGGA----- morR 18 3
-----AGGAGTCCAGCCCCCTAG----- morR 18 2
-----GAGTCCAGCCCCCTAGGAGCTGG----- morR 23 1
-----GGAGTCCAGCCCCCTAGGA----- morR 19 1
-----GAGTCCAGCCCCCTAGGAGCTGGCAACCCTGC--- morR 32 1
-----CAGGAGTCCAGCCCCCTA----- morR 18 1

```

>mmu-mir-24-1

```

GGCACTGCCAGCTGTGATTGGACCCGCCCTCCGGTGCCTACTGAGCTGATATCAGTTCCTCATTTACACACTGGCTCAGTTCAGCAGGAACAGGAGTCGAGCCCTTGAGCAAAAAGCCTACCCATC species len
-----CTGTGATTGGACCCGCCCTCCG----- morL 22 953
-----TGTGATTGGACCCGCCCTCCG----- morL 21 764
-----GTGATTGGACCCGCCCTCCG----- morL 20 651
-----GTGATTGGACCCGCCCTCCGG----- morL 21 75
-----TGTGATTGGACCCGCCCTCCGG----- morL 22 73
-----CTGTGATTGGACCCGCCCTC----- morL 20 61
-----AGCTGTGATTGGACCCGCCCTCCG----- morL 24 59
-----GTGATTGGACCCGCCCTCC----- morL 19 52
-----CTGTGATTGGACCCGCCCTCCGG----- morL 23 49
-----TGTGATTGGACCCGCCCTCC----- morL 20 45
-----GTGATTGGACCCGCCCTC----- morL 18 43
-----CTGTGATTGGACCCGCCCTCC----- morL 21 43
-----CAGCTGTGATTGGACCCGCCCTCCG----- morL 25 38
-----CCAGCTGTGATTGGACCCGCCCTCCG----- morL 26 36
-----TGTGATTGGACCCGCCCTC----- morL 19 33

```

---

|                                        |      |    |      |
|----------------------------------------|------|----|------|
| -----GCTGTGATTGGACCCGCCCTCCG-----      | morL | 23 | 21   |
| -----GCTGTGATTGGACCCGCCCTCC-----       | morL | 22 | 15   |
| -----TGTGATTGGACCCGCCCT-----           | morL | 18 | 11   |
| ---ACTGCCAGCTGTGATTGGACCCGCCCTC-----   | morL | 29 | 11   |
| -----CTGTGATTGGACCCGCCCT-----          | morL | 19 | 9    |
| -----TGATTGGACCCGCCCTCC-----           | morL | 18 | 8    |
| -----CCCAGCTGTGATTGGACCCGCCCTCC-----   | morL | 26 | 8    |
| -GCACTGCCAGCTGTGATTGGACCCGCCCTCC-----  | morL | 32 | 6    |
| GGCACTGCCAGCTGTGATTGGACCCGCCCTC-----   | morL | 32 | 5    |
| -----GCTGTGATTGGACCCGCCCTC-----        | morL | 21 | 5    |
| -----CCAGCTGTGATTGGACCCGCCCTC-----     | morL | 24 | 4    |
| -----CTGTGATTGGACCCGCCCTCCGGT-----     | morL | 24 | 4    |
| -----GTGATTGGACCCGCCCTCCGGT-----       | morL | 22 | 4    |
| -----TGTGATTGGACCCGCCCTCCGGT-----      | morL | 23 | 3    |
| -----GCTGTGATTGGACCCGCCCTCCGG-----     | morL | 24 | 2    |
| -----AGCTGTGATTGGACCCGCCCTCCGG-----    | morL | 25 | 2    |
| -----TGATTGGACCCGCCCTCCGG-----         | morL | 20 | 1    |
| -----CCCAGCTGTGATTGGACCCGCCCTCCGG----- | morL | 28 | 1    |
| -----GCCAGCTGTGATTGGACCCGCCCT-----     | morL | 25 | 1    |
| -----TGGACCCGCCCTCCGGT-----            | morL | 18 | 1    |
| -----CCAGCTGTGATTGGACCCGCCCTCCGGT----- | morL | 28 | 1    |
| -----GTGCCTACTGAGCTGATATCAGT-----      | mirL | 23 | 1956 |
| -----GGTGCCTACTGAGCTGATATCAGT-----     | mirL | 24 | 912  |
| -----TGCCCTACTGAGCTGATATCAGT-----      | mirL | 22 | 885  |
| -----GGTGCCTACTGAGCTGATATCA-----       | mirL | 22 | 583  |
| -----GTGCCTACTGAGCTGATATCA-----        | mirL | 21 | 374  |
| -----GTGCCTACTGAGCTGATATC-----         | mirL | 20 | 333  |
| -----GTGCCTACTGAGCTGATA-----           | mirL | 18 | 190  |
| -----GGTGCCTACTGAGCTGATATC-----        | mirL | 21 | 188  |
| -----GTGCCTACTGAGCTGATATCAG-----       | mirL | 22 | 164  |
| -----GTGCCTACTGAGCTGATATCAGTT-----     | mirL | 24 | 99   |
| -----GTGCCTACTGAGCTGATAT-----          | mirL | 19 | 92   |
| -----TGCCCTACTGAGCTGATATCA-----        | mirL | 20 | 88   |
| -----GGTGCCTACTGAGCTGATAT-----         | mirL | 20 | 52   |
| -----GGTGCCTACTGAGCTGATATCAG-----      | mirL | 23 | 23   |
| -----GCCTACTGAGCTGATATCAGT-----        | mirL | 21 | 15   |
| -----CCTACTGAGCTGATATCAGT-----         | mirL | 20 | 15   |
| -----TGCCCTACTGAGCTGATATCAGTT-----     | mirL | 23 | 13   |
| -----TGCCCTACTGAGCTGATATC-----         | mirL | 19 | 12   |
| -----TGCCCTACTGAGCTGATATCAG-----       | mirL | 21 | 10   |
| -----TGCCCTACTGAGCTGATAT-----          | mirL | 18 | 8    |
| -----GGTGCCTACTGAGCTGATATCAGTT-----    | mirL | 25 | 5    |
| -----GGTGCCTACTGAGCTGATA-----          | mirL | 19 | 5    |
| -----TGCCCTACTGAGCTGATATCAGTTC-----    | mirL | 24 | 4    |
| -----GCCTACTGAGCTGATATCA-----          | mirL | 19 | 2    |
| -----GCCTACTGAGCTGATATC-----           | mirL | 18 | 2    |

---

|                                      |      |    |       |
|--------------------------------------|------|----|-------|
| -----CCTACTGAGCTGATATCA-----         | mirL | 18 | 2     |
| -----CCGGTGCCACTGAGCTG-----          | mirL | 18 | 1     |
| -----GTTCTCATTTACACACTG-----         | loop | 19 | 25    |
| -----TTCTCATTTACACACTGG-----         | loop | 19 | 4     |
| -----TTCTCATTTACACACTG-----          | loop | 18 | 2     |
| -----TCTCATTTACACACTGG-----          | loop | 18 | 2     |
| -----GTTCTCATTTACACACT-----          | loop | 18 | 1     |
| -----TGGCTCAGTTCAGCAGGAACAG-----     | mirR | 22 | 23937 |
| -----TGGCTCAGTTCAGCAGGAACAGG-----    | mirR | 23 | 19532 |
| -----TGGCTCAGTTCAGCAGGAACA-----      | mirR | 21 | 30193 |
| -----GGCTCAGTTCAGCAGGAACAGG-----     | mirR | 22 | 16793 |
| -----TGGCTCAGTTCAGCAGGAACAGGA-----   | mirR | 24 | 13639 |
| -----TGGCTCAGTTCAGCAGGAAC-----       | mirR | 20 | 11091 |
| -----GGCTCAGTTCAGCAGGAACAG-----      | mirR | 21 | 77729 |
| -----TGGCTCAGTTCAGCAGGAACAGGAG-----  | mirR | 25 | 41895 |
| -----TGGCTCAGTTCAGCAGGAA-----        | mirR | 19 | 22401 |
| -----GGCTCAGTTCAGCAGGAACAGGA-----    | mirR | 23 | 12667 |
| -----GCTCAGTTCAGCAGGAACAGGA-----     | mirR | 22 | 10636 |
| -----GGCTCAGTTCAGCAGGAACA-----       | mirR | 20 | 8816  |
| -----GCTCAGTTCAGCAGGAACAGG-----      | mirR | 21 | 6282  |
| -----GGCTCAGTTCAGCAGGAACAGGAG-----   | mirR | 24 | 3597  |
| -----CTGGCTCAGTTCAGCAGGAACAGG-----   | mirR | 24 | 2284  |
| -----GGCTCAGTTCAGCAGGAAC-----        | mirR | 19 | 2122  |
| -----GCTCAGTTCAGCAGGAACAGGAG-----    | mirR | 23 | 1896  |
| -----CTGGCTCAGTTCAGCAGGAACAG-----    | mirR | 23 | 1502  |
| -----GCTCAGTTCAGCAGGAACAG-----       | mirR | 20 | 1135  |
| -----CTGGCTCAGTTCAGCAGGAACA-----     | mirR | 22 | 806   |
| -----GGCTCAGTTCAGCAGGAA-----         | mirR | 18 | 641   |
| -----GCTCAGTTCAGCAGGAACAGGAGT-----   | mirR | 24 | 441   |
| -----CTGGCTCAGTTCAGCAGGAAC-----      | mirR | 21 | 339   |
| -----GCTCAGTTCAGCAGGAACA-----        | mirR | 19 | 205   |
| -----CTGGCTCAGTTCAGCAGGAACAGGA-----  | mirR | 25 | 188   |
| -----CTCAGTTCAGCAGGAACAG-----        | mirR | 19 | 154   |
| -----CTCAGTTCAGCAGGAACAGG-----       | mirR | 20 | 76    |
| -----CTGGCTCAGTTCAGCAGGAACAGGAG----- | mirR | 26 | 63    |
| -----CTGGCTCAGTTCAGCAGGAA-----       | mirR | 20 | 53    |
| -----GCTCAGTTCAGCAGGAACAGGAGTC-----  | mirR | 25 | 48    |
| -----ACTGGCTCAGTTCAGCAGGAACAG-----   | mirR | 24 | 39    |
| -----CTCAGTTCAGCAGGAACA-----         | mirR | 18 | 28    |
| -----CACTGGCTCAGTTCAGCAGGAACAG-----  | mirR | 25 | 23    |
| -----CTCAGTTCAGCAGGAACAGGA-----      | mirR | 21 | 22    |
| -----ACTGGCTCAGTTCAGCAGGAACA-----    | mirR | 23 | 20    |
| -----CTCAGTTCAGCAGGAACAGGAG-----     | mirR | 22 | 10    |
| -----ACTGGCTCAGTTCAGCAGGAACAGG-----  | mirR | 25 | 6     |
| -----ACTGGCTCAGTTCAGCAGGAAC-----     | mirR | 22 | 3     |
| -----CACTGGCTCAGTTCAGCAGGAAC-----    | mirR | 23 | 2     |

```

-----ACTGGCTCAGTTCAGCAGGA----- mirR 21 1
-----ACTGGCTCAGTTCAGCA----- mirR 18 1
-----ACTGGCTCAGTTCAGCAGGAACA----- mirR 24 1
-----CTCAGTTCAGCAGGAACAGGAGT----- mirR 23 1
-----ACTGGCTCAGTTCAGCAGGAACAGGA----- mirR 26 1
-----GAGTCGAGCCCTTGAGCAAAAAGCCT----- morR 26 16
-----GAGTCGAGCCCTTGAGCAAAAAGCCTACCCATC morR 33 9
-----GAGTCGAGCCCTTGAGCAAAAAGCCTACC----- morR 29 9
-----GAGTCGAGCCCTTGAGCAAAAAGCCTAC----- morR 28 4
-----GAGTCGAGCCCTTGAGCAAAAAGCCTACCC--- morR 30 3
-----GAGTCGAGCCCTTGAGCAAAA----- morR 20 1
-----GAGTCGAGCCCTTGAGCAAAAAGCC----- morR 25 1

```

>mmu-mir-293

| Sequence                                                                                                   | species | len | reads |
|------------------------------------------------------------------------------------------------------------|---------|-----|-------|
| CAGGTCCCTGTGGAAATGCTTCAATCTGTGGTACTCAAAGTGTGACATTTTGTCTTTTGTAAAGAAGTGCCGCAGAGTTTGTAGTGTGCGGATTGAGAACTGCAGT |         |     |       |
| -----AAATGCTTCAATCTGTGGT-----                                                                              | morL    | 19  | 98    |
| -----GGAAATGCTTCAATCTGTGGT-----                                                                            | morL    | 21  | 48    |
| -----AAATGCTTCAATCTGTGGTA-----                                                                             | morL    | 20  | 45    |
| -----GAAATGCTTCAATCTGTGGT-----                                                                             | morL    | 20  | 35    |
| -----TGAAATGCTTCAATCTGTGGT-----                                                                            | morL    | 22  | 14    |
| -----GTGAAATGCTTCAATCTGTGGT-----                                                                           | morL    | 23  | 9     |
| ---GGTCCCTGTGGAAATGCTTCAATCTGTGGT---                                                                       | morL    | 30  | 8     |
| ---GTCCCTGTGGAAATGCTTCAATCTGTGGT---                                                                        | morL    | 29  | 8     |
| -----GAAATGCTTCAATCTGTGGTA-----                                                                            | morL    | 22  | 7     |
| -----AAATGCTTCAATCTGTGG-----                                                                               | morL    | 18  | 7     |
| -----GAAATGCTTCAATCTGTGGTA-----                                                                            | morL    | 21  | 6     |
| CAGGTCCCTGTGGAAATGCTTCAATCTGTGGTA-----                                                                     | morL    | 33  | 4     |
| -----GAAATGCTTCAATCTGTGG-----                                                                              | morL    | 19  | 4     |
| -----CTGTGGAAATGCTTCAATCTGTGGTA-----                                                                       | morL    | 26  | 4     |
| -----AATGCTTCAATCTGTGGTA-----                                                                              | morL    | 19  | 2     |
| -----GGAAATGCTTCAATCTGT-----                                                                               | morL    | 18  | 1     |
| -----AAATGCTTCAATCTGTGGTAC-----                                                                            | morL    | 21  | 1     |
| -----GTGAAATGCTTCAATCTGTGGTA-----                                                                          | morL    | 24  | 1     |
| -----GAAATGCTTCAATCTGTG-----                                                                               | morL    | 18  | 1     |
| -----ACTCAAAGTGTGACATTTT-----                                                                              | mirL    | 21  | 81885 |
| -----ACTCAAAGTGTGACATTT-----                                                                               | mirL    | 20  | 7877  |
| -----ACTCAAAGTGTGACATTTTG-----                                                                             | mirL    | 22  | 5594  |
| -----ACTCAAAGTGTGACATT-----                                                                                | mirL    | 19  | 2668  |
| -----ACTCAAAGTGTGACAT-----                                                                                 | mirL    | 18  | 363   |
| -----ACTCAAAGTGTGACATTTTGT-----                                                                            | mirL    | 23  | 242   |
| -----CTCAAAGTGTGACATTTT-----                                                                               | mirL    | 20  | 160   |
| -----ACTCAAAGTGTGACATTTTGT-----                                                                            | mirL    | 24  | 94    |
| -----TACTCAAAGTGTGACATTTT-----                                                                             | mirL    | 22  | 89    |
| -----CTCAAAGTGTGACATTTTG-----                                                                              | mirL    | 21  | 40    |
| -----GGTACTCAAAGTGTGACATT-----                                                                             | mirL    | 22  | 22    |
| -----CTCAAAGTGTGACATTT-----                                                                                | mirL    | 19  | 22    |

```

-----TCAAACGTGTGACATTTT----- mirL 19 19
-----CAAACGTGTGACATTTT----- mirL 18 17
-----GTACTCAAACGTGTGACATTTT----- mirL 23 13
-----CTCAAACGTGTGACATT----- mirL 18 12
-----CTCAAACGTGTGACATTTTGT----- mirL 22 9
-----TCAAACGTGTGACATTT----- mirL 18 4
-----CAAACGTGTGACATTTTG----- mirL 19 3
-----TACTCAAACGTGTGACATT----- mirL 20 3
-----TACTCAAACGTGTGACATTT----- mirL 21 3
-----GTACTCAAACGTGTGACATT----- mirL 21 2
-----TCAAACGTGTGACATTTTG----- mirL 20 2
-----TACTCAAACGTGTGACATTTTG----- mirL 23 1
-----GGTACTCAAACGTGTGACATTT----- mirL 23 1
-----GGTACTCAAACGTGTGACAT----- mirL 21 1
-----GGTACTCAAACGTGTGACATTTT----- mirL 24 1
-----TCAAACGTGTGACATTTTGT----- mirL 22 1
-----AGTGCCGCAGAGTTTGTAGTGT----- mirR 22 4071258
-----AGTGCCGCAGAGTTTGTAGTG----- mirR 21 314660
-----AGTGCCGCAGAGTTTGTAGTGTT----- mirR 23 245609
-----AGTGCCGCAGAGTTTGTAGTGTTG----- mirR 24 32445
-----AGTGCCGCAGAGTTTGTAGT----- mirR 20 28562
-----AAGTGCCGCAGAGTTTGTAGTGT----- mirR 23 6383
-----AGTGCCGCAGAGTTTGTAGTGTTGC----- mirR 25 5601
-----AGTGCCGCAGAGTTTGTAGTGTTGCC----- mirR 26 2584
-----GTGCCGCAGAGTTTGTAGTGT----- mirR 21 2121
-----AAGTGCCGCAGAGTTTGTAGTG----- mirR 22 868
-----AAGTGCCGCAGAGTTTGTAGTGTT----- mirR 24 544
-----GAAGTGCCGCAGAGTTTGTAGT----- mirR 22 515
-----GTGCCGCAGAGTTTGTAGTGTT----- mirR 22 349
-----TGCCGCAGAGTTTGTAGTGT----- mirR 20 296
-----GCCGCAGAGTTTGTAGTGT----- mirR 19 287
-----TGCCGCAGAGTTTGTAGTGTTG----- mirR 22 182
-----GTGCCGCAGAGTTTGTAGTGTTG----- mirR 23 180
-----GAAGTGCCGCAGAGTTTGTAGTGT----- mirR 24 170
-----GTGCCGCAGAGTTTGTAGTG----- mirR 20 154
-----AAGTGCCGCAGAGTTTGTAGT----- mirR 21 113
-----TGCCGCAGAGTTTGTAGTGTTGC----- mirR 23 108
-----AAGTGCCGCAGAGTTTGTAGTGTTG----- mirR 25 78
-----TGCCGCAGAGTTTGTAGTG----- mirR 19 67
-----GAAGTGCCGCAGAGTTTGTAGTG----- mirR 23 66
-----TGCCGCAGAGTTTGTAGTGTT----- mirR 21 54
-----GCCGCAGAGTTTGTAGTGTT----- mirR 20 49
-----GCCGCAGAGTTTGTAGTG----- mirR 18 47
-----AGAAGTGCCGCAGAGTTTGTAGTGT----- mirR 25 26
-----GTGCCGCAGAGTTTGTAG----- mirR 18 25
-----TGCCGCAGAGTTTGTAGTGTTGCC----- mirR 24 19

```

```

-----GTGCCGCAGAGTTTGTAGTGTTC----- mirR 24 18
-----GTGCCGCAGAGTTTGTAGT----- mirR 19 18
-----GAAGTGCCGCAGAGTTTGTAG----- mirR 21 15
-----AAGTGCCGCAGAGTTTGT----- mirR 18 15
-----GCCGCAGAGTTTGTAGTGTTC----- mirR 23 13
-----AAGTGCCGCAGAGTTTGTAGTGTTC----- mirR 26 12
-----AGAAGTGCCGCAGAGTTTGTAGT----- mirR 23 12
-----GCCGCAGAGTTTGTAGTGTTCGCCATGAGA----- mirR 31 9
-----GAAGTGCCGCAGAGTTTGTAGTGTTC----- mirR 25 9
-----GAAGTGCCGCAGAGTTTGT----- mirR 19 7
-----GCCGCAGAGTTTGTAGTGTTC----- mirR 21 7
-----GAAGTGCCGCAGAGTTTGT----- mirR 20 3
-----AGAAGTGCCGCAGAGTTT----- mirR 18 3
-----TGCCGCAGAGTTTGTAGT----- mirR 18 2
-----GCCGCAGAGTTTGTAGTGTTC----- mirR 22 1
-----CGATTGAGAACTGCAGT morR 18 5
-----TGCCGATTGAGAACTGCAGT morR 21 3
-----GCCGATTGAGAACTGCA-- morR 18 2
-----CCGATTGAGAACTGCAG-- morR 18 1

>mmu-mir-21
GTGACATCGCATGGCTGTACCACCTTGTCCGATAGCTTATCAGACTGATGTTGACTGTTGAATCTCATGGCAACAGCAGTCGATGGGCTGTCTGACATTTTGGTATCTTTTCATCTGACCATCCATA species len
-----CTGTACCACCTTGTCCGA----- morL 18 2047
-----GGCTGTACCACCTTGTCCGA----- morL 20 1171
-----GCTGTACCACCTTGTCCGA----- morL 19 800
-----TGGCTGTACCACCTTGTCCGA----- morL 21 321
-----CATGGCTGTACCACCTTGTCCGA----- morL 23 77
-----ATGGCTGTACCACCTTGTCCGA----- morL 22 35
-----CTGTACCACCTTGTCCGAT----- morL 19 33
-----TGTACCACCTTGTCCGAT----- morL 18 31
GTGACATCGCATGGCTGTACCACCTTGTCCGA----- morL 32 21
-----TGTACCACCTTGTCCGATA----- morL 19 13
-----CTGTACCACCTTGTCCGATA----- morL 20 12
-----GGCTGTACCACCTTGTCCG----- morL 19 11
-----GCTGTACCACCTTGTCCG----- morL 18 9
-----GGCTGTACCACCTTGTCCGAT----- morL 21 8
-----GCTGTACCACCTTGTCCGAT----- morL 20 7
-----GGCTGTACCACCTTGTCCGATAG----- morL 23 2
-----TGTACCACCTTGTCCGATAG----- morL 20 2
-----GCTGTACCACCTTGTCCGATA----- morL 21 2
-----TACCACCTTGTCCGATAG----- morL 18 1
-----GTACCACCTTGTCCGATA----- morL 18 1
-----TGGCTGTACCACCTTGTCCG----- morL 20 1
-----TGGCTGTACCACCTTGTCC----- morL 18 1
-----TGGCTGTACCACCTTGTCCGATA----- morL 23 1
-----TAGCTTATCAGACTGATGTTGAC----- mirL 23 275727

```

```

-----TAGCTTATCAGACTGATGTTGA----- mirL 22 623807
-----TAGCTTATCAGACTGATGTTGACT----- mirL 24 415069
-----AGCTTATCAGACTGATGTTGAC----- mirL 22 165865
-----TAGCTTATCAGACTGATGTTG----- mirL 21 56948
-----ATAGCTTATCAGACTGATGTTGA----- mirL 23 24645
-----AGCTTATCAGACTGATGTTGA----- mirL 21 20887
-----TAGCTTATCAGACTGATGTTGACTG----- mirL 25 13625
-----TAGCTTATCAGACTGATGTT----- mirL 20 12309
-----TAGCTTATCAGACTGATG----- mirL 18 11788
-----AGCTTATCAGACTGATGTTGACT----- mirL 23 9823
-----ATAGCTTATCAGACTGATGTTGAC----- mirL 24 5696
-----AGCTTATCAGACTGATGTTG----- mirL 20 4718
-----AGCTTATCAGACTGATGTTGACTG----- mirL 24 1384
-----AGCTTATCAGACTGATGTT----- mirL 19 1175
-----ATAGCTTATCAGACTGATGTTGACT----- mirL 25 1153
-----AGCTTATCAGACTGATGT----- mirL 18 878
-----GCTTATCAGACTGATGTTGAC----- mirL 21 871
-----ATAGCTTATCAGACTGATGTTG----- mirL 22 619
-----GCTTATCAGACTGATGTTGA----- mirL 20 566
-----ATAGCTTATCAGACTGATG----- mirL 19 285
-----ATAGCTTATCAGACTGATGTT----- mirL 21 265
-----CTTATCAGACTGATGTTGAC----- mirL 20 242
-----CTTATCAGACTGATGTTGA----- mirL 19 185
-----GCTTATCAGACTGATGTTGACT----- mirL 22 166
-----ATAGCTTATCAGACTGATGT----- mirL 20 81
-----CTTATCAGACTGATGTTGACT----- mirL 21 47
-----GATAGCTTATCAGACTGATGTTGAC----- mirL 25 38
-----GCTTATCAGACTGATGTTG----- mirL 19 32
-----GGATAGCTTATCAGACTGATGTTGAC----- mirL 26 24
-----GGATAGCTTATCAGACTGATGTT----- mirL 23 17
-----GGATAGCTTATCAGACTGATGTTGA----- mirL 25 17
-----GCTTATCAGACTGATGTTGACTG----- mirL 23 16
-----CTTATCAGACTGATGTTG----- mirL 18 8
-----GGATAGCTTATCAGACTGATGT----- mirL 22 6
-----CTTATCAGACTGATGTTGACTG----- mirL 22 5
-----GCTTATCAGACTGATGTT----- mirL 18 3
-----GGATAGCTTATCAGACTGATGTTG----- mirL 24 2
-----GCTTATCAGACTGATGTTGACTGT----- mirL 24 2
-----GATAGCTTATCAGACTGATGTTG----- mirL 23 1
-----GATAGCTTATCAGACTGA----- mirL 18 1
-----CTTATCAGACTGATGTTGACTGTTG----- mirL 25 1
-----GGATAGCTTATCAGACTGATG----- mirL 21 1
-----CTGTTGAATCTCATGGCAA----- loop 19 1
-----GACTGTTGAATCTCATGGCA----- loop 20 1
-----GACTGTTGAATCTCATGGCAA----- loop 21 1
-----CAACAGCAGTCGATGGGCTGTC----- mirR 22 6351

```

C:\Documents and Settings\hong\Desktop\Reprogramming-total RNA.txt

```
-----CAACAGCAGTCGATGGGCTGTCT----- mirR 23 4125
-----CAACAGCAGTCGATGGGCTGT----- mirR 21 1678
-----AACAGCAGTCGATGGGCTGTCT----- mirR 22 1123
-----ACAGCAGTCGATGGGCTGTCT----- mirR 21 736
-----CAACAGCAGTCGATGGGCTGTCTG----- mirR 24 581
-----ACAGCAGTCGATGGGCTGTCTGA----- mirR 23 304
-----CAACAGCAGTCGATGGGCTGTCTGA----- mirR 25 279
-----ACAGCAGTCGATGGGCTGTCTG----- mirR 22 207
-----AACAGCAGTCGATGGGCTGTCTG----- mirR 23 111
-----CAACAGCAGTCGATGGGCTG----- mirR 20 81
-----CAACAGCAGTCGATGGGCT----- mirR 19 81
-----AACAGCAGTCGATGGGCTGTC----- mirR 21 77
-----AACAGCAGTCGATGGGCTGTCTGA----- mirR 24 56
-----ACAGCAGTCGATGGGCTGTC----- mirR 20 47
-----ACAGCAGTCGATGGGCTGTCTGAC----- mirR 24 25
-----AACAGCAGTCGATGGGCTGT----- mirR 20 18
-----ACAGCAGTCGATGGGCTGT----- mirR 19 12
-----GCAACAGCAGTCGATGGGCTGTC----- mirR 23 12
-----ACAGCAGTCGATGGGCTGTCTGACA----- mirR 25 10
-----AACAGCAGTCGATGGGCT----- mirR 18 6
-----AACAGCAGTCGATGGGCTGTCTGAC----- mirR 25 6
-----GGCAACAGCAGTCGATGGGC----- mirR 20 5
-----TGGCAACAGCAGTCGATGGGCTGTC----- mirR 25 4
-----GCAACAGCAGTCGATGGGCTGT----- mirR 22 2
-----TGGCAACAGCAGTCGATGGGCTGTCT----- mirR 26 1
-----GCAACAGCAGTCGATGGGCTGTCTG----- mirR 25 1
-----CAGCAGTCGATGGGCTGT----- mirR 18 1
-----CAGCAGTCGATGGGCTGTC----- mirR 19 1
-----GGCAACAGCAGTCGATGGGCTGTCT----- mirR 25 1
-----CAGCAGTCGATGGGCTGTCTG----- mirR 21 1
-----TGACATTTTGGTATCTTTCATCTGACCATCC--- morR 31 240
-----TGACATTTTGGTATCTTTCATCTGACCATCCA-- morR 32 28
-----TGACATTTTGGTATCTTTCATCTGACC----- morR 27 19
-----TGACATTTTGGTATCTTTCATCTGACCATC---- morR 30 11
-----TGACATTTTGGTATCTTTCATCTGACCATCCAT- morR 33 8
-----GACATTTTGGTATCTTTCATCTGACCATCCAT- morR 32 3
-----TGACATTTTGGTATCTTTCATCTGACCAT----- morR 29 3
-----TGACATTTTGGTATCTTTCATCTGACCAT----- morR 20 2
-----CTGACATTTTGGTATCTTT----- morR 19 1
-----GACATTTTGGTATCTTTCATCTGACCATCCATA morR 33 1
-----GACATTTTGGTATCTTTC----- morR 18 1
```

>mmu-mir-125a

```
TCCACCATAGCTACACTGCCGGCCTCTGGGTCCCTGAGACCCCTTAACTGTGAGGACGTCCAGGGTCACAGGTGAGGTTCTTGGGAGCCTGGCGCCTGGCCAGCCACAAATTTAGGGATTTTC species len re
-----ACACTGCCGGCCTCTGGG----- morL 18 100
-----CTACACTGCCGGCCTCTGGG----- morL 20 66
```



---

|                                       |                 |
|---------------------------------------|-----------------|
| -----TACACTGCCGGCCTCTGGG-----         | morL 19 63      |
| -----ACACTGCCGGCCTCTGGGT-----         | morL 19 28      |
| -----TACACTGCCGGCCTCTGGGT-----        | morL 20 18      |
| -CCACCATAGCTACACTGCCGGCCTCTGGGT-----  | morL 30 14      |
| -----CTACACTGCCGGCCTCTGGGT-----       | morL 21 10      |
| -----TACACTGCCGGCCTCTGG-----          | morL 18 5       |
| -----CTACACTGCCGGCCTCTGG-----         | morL 19 5       |
| -----CACTGCCGGCCTCTGGGT-----          | morL 18 3       |
| -----CTACACTGCCGGCCTCTG-----          | morL 18 1       |
| -----AGCTACACTGCCGGCCTCTGGG-----      | morL 22 1       |
| TCCACCATAGCTACACTGCCGGCCTCTGGG-----   | morL 30 1       |
| -----TACACTGCCGGCCTCTGGGTCC-----      | morL 22 1       |
| -----GCTACACTGCCGGCCTCTGGG-----       | morL 21 1       |
| -----GCTACACTGCCGGCCTCTGG-----        | morL 20 1       |
| -----ACACTGCCGGCCTCTGGGTCC-----       | morL 21 1       |
| -----TACACTGCCGGCCTCTGGGTCC-----      | morL 21 1       |
| -----TCCCTGAGACCCTTTAACCTGTGA-----    | mirL 24 1881439 |
| -----TCCCTGAGACCCTTTAACCTGT-----      | mirL 22 582099  |
| -----TCCCTGAGACCCTTTAACCTGTG-----     | mirL 23 570325  |
| -----CCCTGAGACCCTTTAACCTGTGA-----     | mirL 23 41691   |
| -----TCCCTGAGACCCTTTAACCTGTGAG-----   | mirL 25 32544   |
| -----TCCCTGAGACCCTTTAACCTG-----       | mirL 21 23248   |
| -----CCCTGAGACCCTTTAACCTGT-----       | mirL 21 10237   |
| -----CCCTGAGACCCTTTAACCTGTG-----      | mirL 22 8968    |
| -----TCCCTGAGACCCTTTAACCTGTGAGG-----  | mirL 26 6309    |
| -----TCCCTGAGACCCTTTAACCT-----        | mirL 20 4125    |
| -----CCCTGAGACCCTTTAACCTGTGAG-----    | mirL 24 724     |
| -----CCCTGAGACCCTTTAACCTG-----        | mirL 20 312     |
| -----CCTGAGACCCTTTAACCTGTGA-----      | mirL 22 258     |
| -----GTCCTGAGACCCTTTAACCTGTGA-----    | mirL 25 186     |
| -----CCCTGAGACCCTTTAACCTGTGAGG-----   | mirL 25 149     |
| -----CTGAGACCCTTTAACCTGTGA-----       | mirL 21 117     |
| -----CCCTGAGACCCTTTAACCT-----         | mirL 19 92      |
| -----CCTGAGACCCTTTAACCTGT-----        | mirL 20 59      |
| -----GTCCTGAGACCCTTTAACCTGTG-----     | mirL 24 45      |
| -----GTCCTGAGACCCTTTAACCTGT-----      | mirL 23 45      |
| -----CTGAGACCCTTTAACCTGTG-----        | mirL 20 37      |
| -----CCTGAGACCCTTTAACCTGTG-----       | mirL 21 28      |
| -----CTGAGACCCTTTAACCTGT-----         | mirL 19 25      |
| -----GGTCCCTGAGACCCTTTAACCTGTGA-----  | mirL 26 19      |
| -----CTGAGACCCTTTAACCTGTGAG-----      | mirL 22 6       |
| -----GGTCCCTGAGACCCTTTAACCTGTG-----   | mirL 25 5       |
| -----CTGAGACCCTTTAACCTG-----          | mirL 18 4       |
| -----GGGTCCCTGAGACCCTTTAACCTGTGA----- | mirL 27 4       |
| -----GTCCTGAGACCCTTTAACCTG-----       | mirL 22 3       |
| -----CCTGAGACCCTTTAACCTGTGAG-----     | mirL 23 2       |

---

```

-----GGTCCCTGAGACCCCTTTAACCTGT----- mirL 24 2
-----CCTGAGACCCCTTTAACCTG----- mirL 19 1
-----GGTCCCTGAGACCCCTTTAACCT----- mirL 22 1
-----GGGTCCCTGAGACCCCTTTAACCTGT----- mirL 25 1
-----GGGTCCCTGAGACCCCTTT----- mirL 18 1
-----CCTGAGACCCCTTTAACCT----- mirL 18 1
-----GGTCCCTGAGACCCCTTTA----- mirL 18 1
-----GTCCCTGAGACCCCTTTAACCTGTGAGG----- mirL 27 1
-----TGAGGACGTCCAGGGTCA----- loop 18 2
-----GAGGACGTCCAGGGTCAC----- loop 18 1
-----AGGACGTCCAGGGTCACA----- loop 18 1
-----ACAGGTGAGGTTCTTGGGAGCC----- mirR 22 2029
-----ACAGGTGAGGTTCTTGGGAGC----- mirR 21 1054
-----ACAGGTGAGGTTCTTGGGAG----- mirR 20 856
-----ACAGGTGAGGTTCTTGGGAGCCT----- mirR 23 633
-----ACAGGTGAGGTTCTTGGGAGCCTGG----- mirR 25 239
-----ACAGGTGAGGTTCTTGGGAGCCTG----- mirR 24 225
-----ACAGGTGAGGTTCTTGGGAGCCTGGC----- mirR 26 165
-----CAGGTGAGGTTCTTGGGAGCC----- mirR 21 147
-----CAGGTGAGGTTCTTGGGAGCCT----- mirR 22 45
-----CAGGTGAGGTTCTTGGGAG----- mirR 19 42
-----CAGGTGAGGTTCTTGGGAGC----- mirR 20 40
-----CAGGTGAGGTTCTTGGGAGCCTGG----- mirR 24 16
-----CAGGTGAGGTTCTTGGGAGCCTG----- mirR 23 11
-----AGGTGAGGTTCTTGGGAGCC----- mirR 20 8
-----CAGGTGAGGTTCTTGGGAGCCTGGC----- mirR 25 7
-----TCACAGGTGAGGTTCTTG----- mirR 18 2
-----GTCACAGGTGAGGTTCTTGGGAG----- mirR 23 2
-----CACAGGTGAGGTTCTTGGGAGC----- mirR 22 1
-----AGGTGAGGTTCTTGGGAG----- mirR 18 1
-----TCACAGGTGAGGTTCTTGGGA----- mirR 21 1
-----CACAGGTGAGGTTCTTGGGAGCC----- mirR 23 1
-----CACAGGTGAGGTTCTTGGGAG----- mirR 21 1
-----TCACAGGTGAGGTTCTTGGGAGCCTG----- mirR 26 1
-----GGTGAGGTTCTTGGGAGC----- mirR 18 1
-----TGGCGCCTGGCCCAGCCACAA----- morR 21 15
-----TGGCGCCTGGCCCAGCCACA----- morR 20 8
-----TGGCGCCTGGCCCAGCCACAAA----- morR 22 2
-----TGGCGCCTGGCCCAGCCA----- morR 18 2
-----TGGCGCCTGGCCCAGCCAC----- morR 19 1
-----GCGCCTGGCCCAGCCACA----- morR 18 1
-----GGCGCCTGGCCCAGCCACAA----- morR 20 1
-----CGCCTGGCCCAGCCACAA----- morR 18 1
-----GGCGCCTGGCCCAGCCACAAA----- morR 21 1
-----TGGCGCCTGGCCCAGCCACAAAATTTAGGGATTC morR 34 1

```

>mmu-mir-290

|                                                                                                                         | species | len | reads   |
|-------------------------------------------------------------------------------------------------------------------------|---------|-----|---------|
| GGACCGCCTCATCTTGC GG TACTCAA ACTATGGGGGCACTTTTTTTTTTCTTTAAAAAGTGCCGCCTAGTTTTTAAGCCCCGCCGGTTGAGAAAACGGCTATCTGGCACATTTACC | morL    | 20  | 34      |
| GGACCGCCTCATCTTGC GG T                                                                                                  | morL    | 22  | 2       |
| GGACCGCCTCATCTTGC GG TAC                                                                                                | morL    | 19  | 2       |
| -GACCGCCTCATCTTGC GG T                                                                                                  | morL    | 20  | 1       |
| -GACCGCCTCATCTTGC GG TA                                                                                                 | morL    | 18  | 1       |
| ----CGCCTCATCTTGC GG TAC                                                                                                | morL    | 18  | 1       |
| GGACCGCCTCATCTTGC G                                                                                                     | morL    | 18  | 1       |
| --ACCGCCTCATCTTGC GG T                                                                                                  | morL    | 18  | 1       |
| -----ACTCAA ACTATGGGGGCACTTTT                                                                                           | mirL    | 22  | 1136433 |
| -----ACTCAA ACTATGGGGGCACTTTT                                                                                           | mirL    | 23  | 971679  |
| -----ACTCAA ACTATGGGGGCACTTTT                                                                                           | mirL    | 24  | 535074  |
| -----ACTCAA ACTATGGGGGCACTT                                                                                             | mirL    | 21  | 189526  |
| -----ACTCAA ACTATGGGGGCACT                                                                                              | mirL    | 20  | 80376   |
| -----ACTCAA ACTATGGGGGCACTTTTTT                                                                                         | mirL    | 25  | 40698   |
| -----ACTCAA ACTATGGGGGCA                                                                                                | mirL    | 18  | 33081   |
| -----CTCAA ACTATGGGGGCACTTTTTT                                                                                          | mirL    | 23  | 25924   |
| -----CTCAA ACTATGGGGGCACTTTT                                                                                            | mirL    | 22  | 8544    |
| -----CTCAA ACTATGGGGGCACTTT                                                                                             | mirL    | 21  | 3410    |
| -----TCAA ACTATGGGGGCACTTTTTT                                                                                           | mirL    | 22  | 2437    |
| -----CTCAA ACTATGGGGGCACTTTTTT                                                                                          | mirL    | 24  | 1535    |
| -----CTCAA ACTATGGGGGCACTT                                                                                              | mirL    | 20  | 1264    |
| -----TCAA ACTATGGGGGCACTTTTT                                                                                            | mirL    | 21  | 714     |
| -----TACTCAA ACTATGGGGGCACTTT                                                                                           | mirL    | 23  | 666     |
| -----CTCAA ACTATGGGGGCACT                                                                                               | mirL    | 19  | 505     |
| -----TACTCAA ACTATGGGGGCACTTTTT                                                                                         | mirL    | 24  | 504     |
| -----TCAA ACTATGGGGGCACTTTT                                                                                             | mirL    | 20  | 440     |
| -----TACTCAA ACTATGGGGGCACTTTTTT                                                                                        | mirL    | 25  | 383     |
| -----CAA ACTATGGGGGCACTTTTT                                                                                             | mirL    | 20  | 373     |
| -----CAA ACTATGGGGGCACTTTTTT                                                                                            | mirL    | 21  | 370     |
| -----CTCAA ACTATGGGGGCACTTTTTT                                                                                          | mirL    | 25  | 281     |
| -----TCAA ACTATGGGGGCACTTTTTT                                                                                           | mirL    | 23  | 273     |
| -----CAA ACTATGGGGGCACTTT                                                                                               | mirL    | 19  | 268     |
| -----GTACTCAA ACTATGGGGGCACTTTT                                                                                         | mirL    | 24  | 158     |
| -----GTACTCAA ACTATGGGGGCACTTTTT                                                                                        | mirL    | 25  | 120     |
| -----TACTCAA ACTATGGGGGCACTT                                                                                            | mirL    | 22  | 110     |
| -----TCAA ACTATGGGGGCACTT                                                                                               | mirL    | 19  | 106     |
| -----GGTACTCAA ACTATGGGGGCACTTTT                                                                                        | mirL    | 25  | 68      |
| -----TACTCAA ACTATGGGGGCA                                                                                               | mirL    | 18  | 66      |
| -----GGTACTCAA ACTATGGGGGCACTTTTT                                                                                       | mirL    | 26  | 64      |
| -----GTACTCAA ACTATGGGGGCACTTTTTT                                                                                       | mirL    | 26  | 64      |
| -----TACTCAA ACTATGGGGGCACT                                                                                             | mirL    | 21  | 56      |
| -----CAA ACTATGGGGGCACTT                                                                                                | mirL    | 18  | 51      |
| -----TCAA ACTATGGGGGCACT                                                                                                | mirL    | 18  | 36      |
| -----TACTCAA ACTATGGGGGCA                                                                                               | mirL    | 19  | 26      |
| -----CAA ACTATGGGGGCACTTTTTT                                                                                            | mirL    | 22  | 25      |

```

-----GTACTCAAACATATGGGGGC----- mirL 19 24
-----GTACTCAAACATATGGGGGCATT----- mirL 23 14
-----GGTACTCAAACATATGGGGGCACCTTTT----- mirL 27 14
-----GTACTCAAACATATGGGGGCACCT----- mirL 22 10
-----TCAAACATATGGGGGCACCTTTT----- mirL 24 9
-----GGTACTCAAACATATGGGGGC----- mirL 20 7
-----GTACTCAAACATATGGGGGCACCTTTT----- mirL 27 6
-----GGTACTCAAACATATGGGGGC----- mirL 21 3
-----GGTACTCAAACATATGGGGGCACCT----- mirL 24 3
-----GGTACTCAAACATATGGGGGCACCT----- mirL 23 2
-----CAAACATATGGGGGCACCTTTT----- mirL 23 1
-----TTTTTTTTCTTTAAAAAG----- loop 19 2
-----TTTTTTTTCTTTAAAAAG----- loop 18 1
-----TTTTTTTTCTTTAAAAAGT----- loop 18 1
-----AGTGCCGCCTAGTTTAAAGCC----- mirR 22 11328
-----AAAGTGCCGCCTAGTTTAAAGCC----- mirR 24 3368
-----AAGTGCCGCCTAGTTTAAAGCC----- mirR 23 2942
-----AGTGCCGCCTAGTTTAAAGCC----- mirR 21 1490
-----AGTGCCGCCTAGTTTAAAGCCC----- mirR 23 923
-----AAAGTGCCGCCTAGTTTAAAGCC----- mirR 23 691
-----AAAGTGCCGCCTAGTTTAAAGCCC----- mirR 25 585
-----AAGTGCCGCCTAGTTTAAAGCC----- mirR 22 550
-----AAGTGCCGCCTAGTTTAAAGCCC----- mirR 24 529
-----GTGCCGCCTAGTTTAAAGCC----- mirR 21 267
-----AAAGTGCCGCCTAGTTTAAAGC----- mirR 22 153
-----AGTGCCGCCTAGTTTAAAGCCCG----- mirR 24 151
-----AGTGCCGCCTAGTTTAAAGC----- mirR 20 142
-----AAAGTGCCGCCTAGTTTAAAGCCCG----- mirR 26 87
-----AAGTGCCGCCTAGTTTAAAGCCCG----- mirR 25 84
-----AAGTGCCGCCTAGTTTAAAGC----- mirR 21 49
-----GCCGCCTAGTTTAAAGCC----- mirR 19 34
-----TGCCGCCTAGTTTAAAGCC----- mirR 20 30
-----AGTGCCGCCTAGTTTAAAGCCCGC----- mirR 25 23
-----AGTGCCGCCTAGTTTAAAG----- mirR 19 23
-----AAAGTGCCGCCTAGTTTAAAG----- mirR 21 20
-----AAAGTGCCGCCTAGTTTAAAG----- mirR 19 20
-----AAGTGCCGCCTAGTTTAAAGCCCGC----- mirR 26 11
-----GTGCCGCCTAGTTTAAAGCCCG----- mirR 22 11
-----GTGCCGCCTAGTTTAAAGCC----- mirR 20 7
-----AAGTGCCGCCTAGTTTAAAG----- mirR 20 7
-----AAAAGTGCCGCCTAGTTTAAAGCC----- mirR 25 5
-----AAAAGTGCCGCCTAGTTTAAAGCCCG----- mirR 26 2
-----TGCCGCCTAGTTTAAAGCCCG----- mirR 21 1
-----GTGCCGCCTAGTTTAAAGC----- mirR 19 1
-----CGCCGGTTGAGAAAACGGCTATCTGGCAC----- morR 29 30
-----CGCCGGTTGAGAAAACGGCTATCTGGCACATTTAC----- morR 35 26

```

```

-----CGCCGGTTGAGAAAACGGCTATCTGGCA----- morR 28 20
-----CCGGTTGAGAAAACGGCTATCTGGCACA----- morR 28 6
-----CCCCGCCGGTTGAGAAAA----- morR 18 6
-----GCCGGTTGAGAAAACGGCTATCTGGCACATTTAC- morR 34 4
-----GCCGGTTGAGAAAACGGCTATCTGGCACATTTACC morR 35 4
-----CCCGCCGGTTGAGAAAAC----- morR 18 2
-----CGCCGGTTGAGAAAACGGCTATCTGGCACA----- morR 30 2
-----CGCCGGTTGAGAAAACGGCTATCTGGCACAT----- morR 31 1
-----CCGCCGGTTGAGAAAACG----- morR 18 1
-----CGCCGGTTGAGAAAACGGCTATCTG----- morR 25 1
-----GCCGGTTGAGAAAACGGC----- morR 18 1
-----CGCCGGTTGAGAAAACGGCTATCTGGC----- morR 27 1

>mmu-mir-292
GTAGATTGTTCTTAAGCTTGACCTCCAGCCTGTGATACTCAAACCTGGGGGCTCTTTTGGATTTTCATCGGAAGAAAAGTGCCGCCAGGTTTTGAGTGTACCCGGTTGAGAACTCAAACCGGCTAAGAAC species le
-----TTGACCTCCAGCCTGTGAT----- morL 19 264
-----CTTGACCTCCAGCCTGTGAT----- morL 20 177
-----GCTTGACCTCCAGCCTGTGAT----- morL 21 110
-----TGACCTCCAGCCTGTGAT----- morL 18 74
-----TTGACCTCCAGCCTGTGA----- morL 18 21
-----AGCTTGACCTCCAGCCTGTGAT----- morL 22 19
-----TTGACCTCCAGCCTGTGATA----- morL 20 15
-----GCTTGACCTCCAGCCTGTGA----- morL 20 13
-----CTTGACCTCCAGCCTGTGATA----- morL 21 12
-----CTTGACCTCCAGCCTGTGA----- morL 19 11
-----TCTTAAGCTTGACCTCCAGCCTGTGAT----- morL 27 8
-----GCTTGACCTCCAGCCTGTGATA----- morL 22 8
-----TGACCTCCAGCCTGTGATA----- morL 19 5
-----GACCTCCAGCCTGTGATA----- morL 18 3
-----GACCTCCAGCCTGTGATAC----- morL 19 2
-----CTTGACCTCCAGCCTGTG----- morL 18 2
-----AAGCTTGACCTCCAGCCTGTGATA----- morL 24 2
-----TTAAGCTTGACCTCCAGCCTGTGAT----- morL 25 1
GTAGATTGTTCTTAAGCTTGACCTCCAGCCTGT----- morL 33 1
-----GTTCTTAAGCTTGACCTCCAGCCTGTGATA----- morL 30 1
-----GCTTGACCTCCAGCCTGT----- morL 18 1
-----GCTTGACCTCCAGCCTGTG----- morL 19 1
-----AGCTTGACCTCCAGCCTGTGA----- morL 21 1
-----ACTCAAACCTGGGGGCTCTTTT----- mirL 21 759
-----ACTCAAACCTGGGGGCTCTTTG----- mirL 22 509
-----ACTCAAACCTGGGGGCTCTTT----- mirL 20 113
-----ACTCAAACCTGGGGGCTCTTTGG----- mirL 23 987
-----ACTCAAACCTGGGGGCTCTT----- mirL 19 353
-----ACTCAAACCTGGGGGCTCTTTTGG----- mirL 24 717
-----ACTCAAACCTGGGGGCTCT----- mirL 18 535
-----CTCAAACCTGGGGGCTCTTT----- mirL 20 666

```

```
-----CTCAAAGTGGGGGCTCTTTG----- mirL 21 557
-----TACTCAAAGTGGGGGCTCTTT----- mirL 22 555
-----TACTCAAAGTGGGGGCTCTTTG----- mirL 23 324
-----CAAAGTGGGGGCTCTTTG----- mirL 19 197
-----CAAAGTGGGGGCTCTTT----- mirL 18 162
-----TACTCAAAGTGGGGGCTCTTT----- mirL 21 132
-----TCAAAGTGGGGGCTCTTTG----- mirL 20 128
-----ATACTCAAAGTGGGGGCTCTTT----- mirL 23 113
-----TCAAAGTGGGGGCTCTTT----- mirL 19 105
-----CTCAAAGTGGGGGCTCTTT----- mirL 19 101
-----TACTCAAAGTGGGGGCTCTTTG----- mirL 24 84
-----CTCAAAGTGGGGGCTCTTTG----- mirL 22 72
-----TCAAAGTGGGGGCTCTTTG----- mirL 21 52
-----ATACTCAAAGTGGGGGCTCTTTG----- mirL 24 48
-----GATACTCAAAGTGGGGGCTCTTT----- mirL 24 33
-----CAAAGTGGGGGCTCTTTG----- mirL 20 28
-----TCAAAGTGGGGGCTCTTT----- mirL 18 26
-----TACTCAAAGTGGGGGCTCTT----- mirL 20 26
-----CTCAAAGTGGGGGCTCTT----- mirL 18 21
-----ATACTCAAAGTGGGGGCTCTTT----- mirL 22 17
-----CTCAAAGTGGGGGCTCTTTGGATTTTCAT----- mirL 30 11
-----ATACTCAAAGTGGGGGCT----- mirL 18 9
-----CTCAAAGTGGGGGCTCTTTGGA----- mirL 23 7
-----ATACTCAAAGTGGGGGCTCTTTG----- mirL 25 6
-----ATACTCAAAGTGGGGGCTCTT----- mirL 21 6
-----TACTCAAAGTGGGGGCTCT----- mirL 19 5
-----GATACTCAAAGTGGGGGCTCTTTG----- mirL 25 5
-----TCAAAGTGGGGGCTCTTTGGA----- mirL 22 5
-----TCAAAGTGGGGGCTCTTTGGAT----- mirL 24 3
-----GATACTCAAAGTGGGGGCT----- mirL 19 2
-----GATACTCAAAGTGGGGGCTCTTT----- mirL 23 2
-----TACTCAAAGTGGGGGCTCT----- mirL 18 1
-----CAAAGTGGGGGCTCTTTGGA----- mirL 21 1
-----GATACTCAAAGTGGGGGCTCTTTG----- mirL 26 1
-----GGATTTTCATCGGAAGAA----- loop 18 246
-----GGATTTTCATCGGAAGAAA----- loop 19 33
-----GGATTTTCATCGGAAGAAAA----- loop 20 4
-----GGATTTTCATCGGAAGAAAAG----- loop 21 3
-----AAGTGCCGCCAGGTTTGTAGTGT----- mirR 23 788
-----AAAGTGCCGCCAGGTTTGTAGTGT----- mirR 24 480
-----AAAGTGCCGCCAGGTTTGTAGT----- mirR 22 563
-----AAGTGCCGCCAGGTTTGTAGTGTC----- mirR 24 560
-----AAAGTGCCGCCAGGTTTGTAGTG----- mirR 23 384
-----AAAGTGCCGCCAGGTTTGTAGTGTC----- mirR 25 338
-----AAGTGCCGCCAGGTTTGTAGTG----- mirR 22 212
-----AAGTGCCGCCAGGTTTGTAGTGCA----- mirR 25 978
```

```

-----AAAGTGCCGCCAGGTTTTGAGTGTC----- mirR 26 512
-----AAGTGCCGCCAGGTTTTGAGT----- mirR 21 464
-----AGTGCCGCCAGGTTTTGAGTGT----- mirR 22 450
-----AAAGTGCCGCCAGGTTTTGAG----- mirR 21 332
-----AAAGTGCCGCCAGGTTTTG----- mirR 19 101
-----AGTGCCGCCAGGTTTTGAGTGTC----- mirR 23 863
-----AAGTGCCGCCAGGTTTTGAGTGTCAC----- mirR 26 715
-----AAGTGCCGCCAGGTTTTGAG----- mirR 20 543
-----GTGCCGCCAGGTTTTGAGTGT----- mirR 21 501
-----AGTGCCGCCAGGTTTTGAGTGTC----- mirR 24 383
-----AAAAGTGCCGCCAGGTTTTGAGTGT----- mirR 25 208
-----TGCCGCCAGGTTTTGAGTGT----- mirR 20 208
-----GTGCCGCCAGGTTTTGAGTG----- mirR 20 93
-----TGCCGCCAGGTTTTGAGTGTCACC----- mirR 24 74
-----AGTGCCGCCAGGTTTTGAGTG----- mirR 21 64
-----AAAAGTGCCGCCAGGTTTTGAGT----- mirR 23 58
-----AGTGCCGCCAGGTTTTGAGT----- mirR 20 45
-----GTGCCGCCAGGTTTTGAGT----- mirR 19 25
-----AAAAGTGCCGCCAGGTTTTGAGTG----- mirR 24 24
-----GTGCCGCCAGGTTTTGAGTGTC----- mirR 23 22
-----AGTGCCGCCAGGTTTTGA----- mirR 18 21
-----GTGCCGCCAGGTTTTGAGTGTC----- mirR 22 21
-----GAAAAGTGCCGCCAGGTTTTGAGTGT----- mirR 26 19
-----TGCCGCCAGGTTTTGAGTGTC----- mirR 22 15
-----GTGCCGCCAGGTTTTGAG----- mirR 18 13
-----TGCCGCCAGGTTTTGAGTGTCACCG----- mirR 25 13
-----AAAAGTGCCGCCAGGTTTTGAGTGTC----- mirR 26 11
-----TGCCGCCAGGTTTTGAGTGTC----- mirR 21 11
-----TGCCGCCAGGTTTTGAGTGTCAC----- mirR 23 10
-----AGTGCCGCCAGGTTTTGAGTGTCAC----- mirR 25 9
-----AAAAGTGCCGCCAGGTTTTGAG----- mirR 22 7
-----GTGCCGCCAGGTTTTGAGTGTCAC----- mirR 24 6
-----TGCCGCCAGGTTTTGAGTG----- mirR 19 6
-----GAAAAGTGCCGCCAGGTTTTGAGTGTC----- mirR 27 4
-----GAAAAGTGCCGCCAGGTTTTGAGTG----- mirR 25 3
-----GAAAAGTGCCGCCAGGTTTTGAGT----- mirR 24 2
-----AAAAGTGCCGCCAGGTTTTGA----- mirR 21 1
-----AAAAGTGCCGCCAGGTTTTG----- mirR 20 1
-----CACCGTTGAGAACTCAAAAACG----- morR 22 9
-----TCACCGTTGAGAACTCA----- morR 18 4
-----CACCGTTGAGAACTCAAAAACGGCTA----- morR 26 2
-----CACCGTTGAGAACTCAAAAACGG----- morR 23 1
-----CACCGTTGAGAACTCAAAAACGGCTAAGAAC morR 31 1
-----CACCGTTGAGAACTCAAAA----- morR 20 1
-----ACCGTTGAGAACTCAAAA----- morR 18 1

```

>mmu-mir-294

| Sequence                                                                                                                | species | len | reads  |
|-------------------------------------------------------------------------------------------------------------------------|---------|-----|--------|
| GATCTAGCGAAATTCATATAGCCATACTCAAAATGGAGGCCCTATCTAAGCTTTTAAGTGGAAAGTGCTTCCCTTTTGTGTGTTGCCATGTGGAGAAAGCATCGGAACTTCAATCAACC | morL    | 19  | 445    |
| -----CGAAATTCATATAGCCAT-----                                                                                            | morL    | 18  | 187    |
| -----GAAATTCATATAGCCAT-----                                                                                             | morL    | 20  | 144    |
| -----GCGAAATTCATATAGCCAT-----                                                                                           | morL    | 22  | 57     |
| -----TAGCGAAATTCATATAGCCAT-----                                                                                         | morL    | 20  | 38     |
| -----CGAAATTCATATAGCCATA-----                                                                                           | morL    | 19  | 36     |
| -----GAAATTCATATAGCCATA-----                                                                                            | morL    | 24  | 28     |
| --TCTAGCGAAATTCATATAGCCAT--                                                                                             | morL    | 21  | 19     |
| -----GCGAAATTCATATAGCCATA-----                                                                                          | morL    | 21  | 19     |
| -----AGCGAAATTCATATAGCCAT-----                                                                                          | morL    | 23  | 9      |
| --TCTAGCGAAATTCATATAGCCA--                                                                                              | morL    | 21  | 4      |
| -----CTAGCGAAATTCATATAGCCAT-----                                                                                        | morL    | 19  | 3      |
| -----CGAAATTCATATAGCCATAC-----                                                                                          | morL    | 18  | 3      |
| -----GCGAAATTCATATAGCCA-----                                                                                            | morL    | 18  | 3      |
| -----CGAAATTCATATAGCCA-----                                                                                             | morL    | 22  | 2      |
| -----AATTCCATATAGCCATAC-----                                                                                            | morL    | 21  | 2      |
| -----CTAGCGAAATTCATATAGCCA-----                                                                                         | morL    | 19  | 2      |
| -----TAGCGAAATTCATATAGCCA-----                                                                                          | morL    | 18  | 1      |
| -----AATTCCATATAGCCATACT-----                                                                                           | morL    | 18  | 1      |
| -----ATTCCATATAGCCATACT-----                                                                                            | morL    | 23  | 1      |
| -----AAATTCATATAGCCATA-----                                                                                             | morL    | 23  | 1      |
| -----AGCGAAATTCATATAGCCATAC-----                                                                                        | morL    | 25  | 1      |
| -----TAGCGAAATTCATATAGCCATA-----                                                                                        | morL    | 22  | 1      |
| --TCTAGCGAAATTCATATAGCCATA--                                                                                            | morL    | 24  | 1      |
| --TCTAGCGAAATTCATATAGCC--                                                                                               | morL    | 24  | 1      |
| -----CTAGCGAAATTCATATAGCCATA-----                                                                                       | morL    | 24  | 1      |
| GATCTAGCGAAATTCATATAGCC-----                                                                                            | mirL    | 22  | 181007 |
| -----ACTCAAAATGGAGGCCCTATCT-----                                                                                        | mirL    | 21  | 8571   |
| -----ACTCAAAATGGAGGCCCTATC-----                                                                                         | mirL    | 20  | 5165   |
| -----ACTCAAAATGGAGGCCCTAT-----                                                                                          | mirL    | 23  | 4282   |
| -----TACTCAAAATGGAGGCCCTATCT-----                                                                                       | mirL    | 19  | 3319   |
| -----ACTCAAAATGGAGGCCCTA-----                                                                                           | mirL    | 23  | 2529   |
| -----ACTCAAAATGGAGGCCCTATCTA-----                                                                                       | mirL    | 22  | 1580   |
| -----TACTCAAAATGGAGGCCCTATC-----                                                                                        | mirL    | 21  | 1030   |
| -----TACTCAAAATGGAGGCCCTAT-----                                                                                         | mirL    | 18  | 602    |
| -----ACTCAAAATGGAGGCCCT-----                                                                                            | mirL    | 21  | 598    |
| -----CTCAAAATGGAGGCCCTATCT-----                                                                                         | mirL    | 24  | 553    |
| -----ACTCAAAATGGAGGCCCTATCTAA-----                                                                                      | mirL    | 20  | 130    |
| -----TACTCAAAATGGAGGCCCTA-----                                                                                          | mirL    | 20  | 99     |
| -----CTCAAAATGGAGGCCCTATC-----                                                                                          | mirL    | 24  | 76     |
| -----TACTCAAAATGGAGGCCCTATCTA-----                                                                                      | mirL    | 19  | 60     |
| -----CAAAATGGAGGCCCTATCT-----                                                                                           | mirL    | 20  | 58     |
| -----TCAAAATGGAGGCCCTATCT-----                                                                                          | mirL    | 19  | 49     |
| -----CTCAAAATGGAGGCCCTAT-----                                                                                           | mirL    | 24  | 19     |
| -----ATACTCAAAATGGAGGCCCTATCT-----                                                                                      |         |     |        |



```

-----TACTCAAAATGGAGGCCCT----- mirL 19 17
-----TACTCAAAATGGAGGCCCTATCTAA----- mirL 25 17
-----TCAAAATGGAGGCCCTATC----- mirL 19 12
-----ATACTCAAAATGGAGGCCCTATC----- mirL 23 7
-----CAAATGGAGGCCCTATCTA----- mirL 20 7
-----CAAATGGAGGCCCTATC----- mirL 18 7
-----TCAAAATGGAGGCCCTAT----- mirL 18 5
-----CTCAAAATGGAGGCCCTA----- mirL 18 3
-----ATACTCAAAATGGAGGCCCTA----- mirL 21 2
-----CTCAAAATGGAGGCCCTATCTAAG----- mirL 24 2
-----CATACTCAAAATGGAGGCCCTATCTA----- mirL 26 2
-----CAAATGGAGGCCCTATCTAAG----- mirL 22 1
-----ATACTCAAAATGGAGGCC----- mirL 18 1
-----CTCAAAATGGAGGCCCTATCTA----- mirL 22 1
-----TCAAAATGGAGGCCCTATCTAA----- mirL 22 1
-----CTCAAAATGGAGGCCCTATCTAAGCTT----- mirL 27 1
-----ATACTCAAAATGGAGGCCCTAT----- mirL 22 1
-----AAAGTGCTTCCCTTTTGTGTGT----- mirR 22 2451217
-----AAGTGCTTCCCTTTTGTGTGT----- mirR 21 70841
-----AAAGTGCTTCCCTTTTGTGTG----- mirR 21 51358
-----AAAGTGCTTCCCTTTTGTGTGTT----- mirR 23 35024
-----AAAGTGCTTCCCTTTTGTGT----- mirR 20 17964
-----AAAGTGCTTCCCTTTTGTGTGTTG----- mirR 24 9254
-----AAGTGCTTCCCTTTTGTGTGTT----- mirR 22 2074
-----AAAGTGCTTCCCTTTTGTGTGTTGC----- mirR 25 1780
-----AAAGTGCTTCCCTTTTGTGTGTTGCC----- mirR 26 1305
-----GAAAGTGCTTCCCTTTTGTGTGT----- mirR 23 831
-----AGTGCTTCCCTTTTGTGTGT----- mirR 20 719
-----AAGTGCTTCCCTTTTGTGTGT----- mirR 20 688
-----AAGTGCTTCCCTTTTGTGTGTTG----- mirR 23 493
-----GTGCTTCCCTTTTGTGTGT----- mirR 19 427
-----AAGTGCTTCCCTTTTGTGT----- mirR 19 168
-----AAGTGCTTCCCTTTTGTGTGTTGC----- mirR 24 59
-----GGAAAGTGCTTCCCTTTTGTGTGT----- mirR 24 57
-----GAAAGTGCTTCCCTTTTGTGTG----- mirR 22 56
-----AAGTGCTTCCCTTTTGTGTGTTGCC----- mirR 25 32
-----AGTGCTTCCCTTTTGTGTG----- mirR 19 24
-----GAAAGTGCTTCCCTTTTGTGT----- mirR 21 20
-----GAAAGTGCTTCCCTTTTGTGTGTT----- mirR 24 20
-----AGTGCTTCCCTTTTGTGT----- mirR 18 19
-----AGTGCTTCCCTTTTGTGTGTT----- mirR 21 13
-----TGGAAAGTGCTTCCCTTTTGTGTGT----- mirR 25 10
-----GTGCTTCCCTTTTGTGTG----- mirR 18 8
-----GTGCTTCCCTTTTGTGTGTT----- mirR 20 8
-----GAAAGTGCTTCCCTTTTGTGTGTTG----- mirR 25 4
-----GGAAAGTGCTTCCCTTTTGTGT----- mirR 22 4

```

```

-----TGGAAAGTGCTTCCCTTTTGTG----- mirR 22 4
-----GGAAAGTGCTTCCCTTTT----- mirR 18 2
-----AGTGCTTCCCTTTTGTGTGTTG----- mirR 22 2
-----AGTGCTTCCCTTTTGTGTGTTGC----- mirR 23 1
-----GAAAGTGCTTCCCTTTTGTG----- mirR 18 1
-----GAAAGTGCTTCCCTTTTGTGTGTTGC----- mirR 26 1
-----TGCCATGTGGAGAAAGCATCG----- morR 21 544
-----TGCCATGTGGAGAAAGCATCGGAACTTCAATCAAC----- morR 35 189
-----TGCCATGTGGAGAAAGCATCGGA----- morR 23 139
-----TGCCATGTGGAGAAAGCATCGGAAC----- morR 25 127
-----TGCCATGTGGAGAAAGCATCGGAACTTCAATC----- morR 32 99
-----TGCCATGTGGAGAAAGCATCGGAACT----- morR 26 73
-----TGCCATGTGGAGAAAGCATCGG----- morR 22 41
-----GCCATGTGGAGAAAGCATCG----- morR 20 20
-----GCCATGTGGAGAAAGCATCGGAACTTCAATCAACC morR 35 8
-----GCCATGTGGAGAAAGCATCG----- morR 19 2
-----GTTGCCATGTGGAGAAAGC----- morR 19 1
-----GCCATGTGGAGAAAGCATCGGAACTTCAATC----- morR 31 1
-----TTGCCATGTGGAGAAAGCATCG----- morR 22 1
-----GCCATGTGGAGAAAGCATCGGAACTTCAATCAAC----- morR 34 1
-----GCCATGTGGAGAAAGCATCGGAAC----- morR 24 1

>mmu-mir-29a
CAGTGCACATGACCTCTTGTGACCCCTTAGAGGATGACTGATTCTTTTGGTGTTCAGAGTCAATAGAATTTCTAGACCATCTGAAATCGGTTATAATGATTGGGGAAGAGCACCGTTCAGCTGAC species len
CAGTGCACATGACCTCTTGTGACCCCTTAGAGG----- morL 33 4
-----CTTGTGACCCCTTAGAGGAT----- morL 20 1
-----TTGTGACCCCTTAGAGGATGA----- morL 21 1
CAGTGCACATGACCTCTTGTGACCCCTTAGAGGAT----- morL 35 1
-----ACCCCTTAGAGGATGACT----- morL 18 1
-----TGTGACCCCTTAGAGGATG----- morL 19 1
-----GTGACCCCTTAGAGGATGA----- morL 19 1
-----TTGTGACCCCTTAGAGGA----- morL 18 1
-----ACTGATTCTTTTGGTGTTCAGA----- mirL 23 2277
-----ACTGATTCTTTTGGTGTTCAGAGT----- mirL 25 1980
-----ACTGATTCTTTTGGTGTTCAGAG----- mirL 24 857
-----ACTGATTCTTTTGGTGTTCAG----- mirL 22 543
-----ACTGATTCTTTTGGTGTTCAG----- mirL 21 526
-----ACTGATTCTTTTGGTGTTC----- mirL 20 259
-----ACTGATTCTTTTGGTGTTCAGAGTC----- mirL 26 143
-----CTGATTCTTTTGGTGTTCAGAGT----- mirL 24 61
-----TGATTCTTTTGGTGTTCAGAGT----- mirL 23 56
-----TGATTCTTTTGGTGTTCAGAG----- mirL 22 46
-----CTGATTCTTTTGGTGTTCAGA----- mirL 22 39
-----GATTCTTTTGGTGTTCAGA----- mirL 20 21
-----CTGATTCTTTTGGTGTTCAGAG----- mirL 23 19
-----TGATTCTTTTGGTGTTCAGA----- mirL 21 18

```

```

-----GACTGATTTCCTTTGGGTGTTTCAGAGT----- mirL 26 12
-----GATTTCCTTTGGGTGTTTCAGAGT----- mirL 22 12
-----CTGATTTCCTTTGGGTGTTCA----- mirL 20 7
-----TGATTTCCTTTGGGTGTTTC----- mirL 18 5
-----CTGATTTCCTTTGGGTGTTTC----- mirL 19 4
-----TGACTGATTTCCTTTGGGTGTTTC----- mirL 22 4
-----CTGATTTCCTTTGGGTGTTTCAG----- mirL 21 3
-----TGATTTCCTTTGGGTGTTTCAG----- mirL 20 3
-----GACTGATTTCCTTTGGGTGTTTCAG----- mirL 23 3
-----TGATTTCCTTTGGGTGTTTCAGAGTC----- mirL 24 3
-----GACTGATTTCCTTTGGGTGTTTC----- mirL 21 2
-----CTGATTTCCTTTGGGTGTTTC----- mirL 18 2
-----TGACTGATTTCCTTTGGGT----- mirL 18 2
-----GACTGATTTCCTTTGGGTGTTTC----- mirL 20 2
-----TGACTGATTTCCTTTGGGTGTTTC----- mirL 21 1
-----GACTGATTTCCTTTGGGTGTTTCAG----- mirL 22 1
-----GATTTCCTTTGGGTGTTTCAGAGTC----- mirL 23 1
-----AGAGTCAATAGAATTTTC----- loop 18 2
-----AGAGTCAATAGAATTTTCT----- loop 19 1
-----TAGCACCATCTGAAATCGGTTA----- mirR 22 1988
-----TAGCACCATCTGAAATCGGTT----- mirR 21 3980
-----AGCACCATCTGAAATCGGTTA----- mirR 21 1231
-----CTAGCACCATCTGAAATCGGTTA----- mirR 23 6593
-----TAGCACCATCTGAAATCGGTTAT----- mirR 23 4911
-----CTAGCACCATCTGAAATCGGTT----- mirR 22 4650
-----AGCACCATCTGAAATCGGTT----- mirR 20 2778
-----TAGCACCATCTGAAATCGGT----- mirR 20 1434
-----AGCACCATCTGAAATCGGTTAT----- mirR 22 2821
-----TAGCACCATCTGAAATCGGTTATA----- mirR 24 2484
-----CTAGCACCATCTGAAATCGGT----- mirR 21 1872
-----CTAGCACCATCTGAAATCGGTTAT----- mirR 24 1738
-----TAGCACCATCTGAAATCGG----- mirR 19 1531
-----GCACCATCTGAAATCGGTTA----- mirR 20 1214
-----CTAGCACCATCTGAAATCG----- mirR 19 680
-----CTAGCACCATCTGAAATCGG----- mirR 20 555
-----AGCACCATCTGAAATCGGT----- mirR 19 476
-----TCTAGCACCATCTGAAATCGGTTA----- mirR 24 339
-----TAGCACCATCTGAAATCG----- mirR 18 326
-----GCACCATCTGAAATCGGTT----- mirR 19 260
-----CTAGCACCATCTGAAATC----- mirR 18 196
-----AGCACCATCTGAAATCGGTTATA----- mirR 23 144
-----AGCACCATCTGAAATCGG----- mirR 18 117
-----TCTAGCACCATCTGAAATCGGTT----- mirR 23 89
-----CACCATCTGAAATCGGTTA----- mirR 19 61
-----GCACCATCTGAAATCGGTTAT----- mirR 21 45
-----CACCATCTGAAATCGGTT----- mirR 18 42

```

```

-----AGCACCATCTGAAATCGGTTATAA----- mirR 24 14
-----TTCTAGCACCATCTGAAATCGGTT----- mirR 24 5
-----TCTAGCACCATCTGAAATCGGT----- mirR 22 4
-----TTCTAGCACCATCTGAAATCGGTTA----- mirR 25 4
-----GCACCATCTGAAATCGGT----- mirR 18 4
-----TCTAGCACCATCTGAAATCGGTTAT----- mirR 25 2
-----TCTAGCACCATCTGAAATCG----- mirR 20 1
-----ATAATGATTGGGAAGAG----- morR 18 2
-----TAATGATTGGGAAGAGCACCGTTCAGCTGAC----- morR 32 1
-----ATGATTGGGAAGAGCAC----- morR 18 1

```

>mmu-mir-23a

| Sequence                                                                                                             | species | len | reads   |
|----------------------------------------------------------------------------------------------------------------------|---------|-----|---------|
| GCCCCCTCACTGTGCCTCGGACGGCTGGGGTTCTGGGGATGGGATTTGATGCCAGTCACAAATCACATTGCCAGGATTTCCAAC TGACCCTGTGCTCTGCCTTGGGGCTCCTGTC | morL    | 19  | 43      |
| -----CACTGTGCCTCGGACGGCT-----                                                                                        | morL    | 20  | 8       |
| -----TCACTGTGCCTCGGACGGCT-----                                                                                       | morL    | 20  | 7       |
| -----CACTGTGCCTCGGACGGCTG-----                                                                                       | morL    | 21  | 5       |
| -----CTCACTGTGCCTCGGACGGCT-----                                                                                      | morL    | 18  | 3       |
| -----CACTGTGCCTCGGACGGC-----                                                                                         | morL    | 28  | 1       |
| GCCCCCTCACTGTGCCTCGGACGGCTG-----                                                                                     | morL    | 22  | 1       |
| -----CCCTCACTGTGCCTCGGACGGC-----                                                                                     | morL    | 18  | 1       |
| -----ACTGTGCCTCGGACGGCT-----                                                                                         | morL    | 22  | 1       |
| -----TCACTGTGCCTCGGACGGCTGG-----                                                                                     | morL    | 27  | 1       |
| GCCCCCTCACTGTGCCTCGGACGGCT-----                                                                                      | mirL    | 22  | 4878    |
| -----GGGGTTCCTGGGGATGGGATT-----                                                                                      | mirL    | 21  | 1307    |
| -----GGGGTTCCTGGGGATGGGATT-----                                                                                      | mirL    | 23  | 667     |
| -----GGGGTTCCTGGGGATGGGATTTG-----                                                                                    | mirL    | 24  | 123     |
| -----GGGGTTCCTGGGGATGGGATTTGA-----                                                                                   | mirL    | 20  | 62      |
| -----GGGGTTCCTGGGGATGGGA-----                                                                                        | mirL    | 19  | 58      |
| -----GGTTCCTGGGGATGGGATT-----                                                                                        | mirL    | 20  | 38      |
| -----GGGGTTCCTGGGGATGGGATTTGAT-----                                                                                  | mirL    | 25  | 26      |
| -----GGTTCCTGGGGATGGGATT-----                                                                                        | mirL    | 21  | 10      |
| -----GTTTCCTGGGGATGGGATT-----                                                                                        | mirL    | 19  | 9       |
| -----GGTTCCTGGGGATGGGATTTGA-----                                                                                     | mirL    | 22  | 6       |
| -----CTGGGGTTCCTGGGGATG-----                                                                                         | mirL    | 18  | 4       |
| -----GGTTCCTGGGGATGGGATTTG-----                                                                                      | mirL    | 21  | 3       |
| -----GTTTCCTGGGGATGGGATTTGA-----                                                                                     | mirL    | 21  | 3       |
| -----TGGGGTTCCTGGGGATGGGATTT-----                                                                                    | mirL    | 23  | 2       |
| -----GTTTCCTGGGGATGGGATTTGAT-----                                                                                    | mirL    | 22  | 1       |
| -----GTTTCCTGGGGATGGGATT-----                                                                                        | mirL    | 18  | 1       |
| -----GGTTCCTGGGGATGGGATT-----                                                                                        | mirL    | 19  | 1       |
| -----TTTGATGCCAGTCACAAA-----                                                                                         | loop    | 18  | 2       |
| -----ATCACATTGCCAGGGATTTCCA-----                                                                                     | mirR    | 22  | 1198646 |
| -----ATCACATTGCCAGGGATTTCCA-----                                                                                     | mirR    | 23  | 371162  |
| -----ATCACATTGCCAGGGATTTCC-----                                                                                      | mirR    | 21  | 284083  |
| -----ATCACATTGCCAGGGATTTCC-----                                                                                      | mirR    | 20  | 114363  |

```

-----ATCACATTGCCAGGGATTTC AAC----- mirR 24 100190
-----ATCACATTGCCAGGGATTT----- mirR 19 30504
-----ATCACATTGCCAGGGATTTC AAC----- mirR 25 14732
-----TCACATTGCCAGGGATTTC CA----- mirR 21 9091
-----AATCACATTGCCAGGGATTTC CA----- mirR 23 7345
-----AATCACATTGCCAGGGATTTC C----- mirR 22 3527
-----TCACATTGCCAGGGATTTC CA----- mirR 22 3388
-----CACATTGCCAGGGATTTC CA----- mirR 20 3333
-----TCACATTGCCAGGGATTTC AAC----- mirR 23 3018
-----AATCACATTGCCAGGGATTTC CA----- mirR 24 1954
-----ACATTGCCAGGGATTTC CA----- mirR 19 1658
-----TCACATTGCCAGGGATTTC C----- mirR 20 1499
-----AATCACATTGCCAGGGATTTC----- mirR 21 1213
-----CACATTGCCAGGGATTTC CA----- mirR 21 1037
-----TCACATTGCCAGGGATTTC----- mirR 19 821
-----ACATTGCCAGGGATTTC CA----- mirR 20 698
-----TCACATTGCCAGGGATTTC AAC----- mirR 24 596
-----CACATTGCCAGGGATTTC C----- mirR 19 594
-----AATCACATTGCCAGGGATTT----- mirR 20 511
-----CACATTGCCAGGGATTTC AAC----- mirR 22 383
-----AATCACATTGCCAGGGATTTC AAC----- mirR 25 363
-----ACATTGCCAGGGATTTC C----- mirR 18 246
-----CACATTGCCAGGGATTTC----- mirR 18 211
-----TCACATTGCCAGGGATTT----- mirR 18 164
-----ACATTGCCAGGGATTTC AAC----- mirR 21 160
-----CACATTGCCAGGGATTTC AAC----- mirR 23 100
-----AATCACATTGCCAGGGATTTC AAC----- mirR 26 64
-----AAATCACATTGCCAGGGATTTC CA----- mirR 24 30
-----ACATTGCCAGGGATTTC AAC----- mirR 22 30
-----AAATCACATTGCCAGGGATTTC CA----- mirR 25 17
-----AAATCACATTGCCAGGGATTTC C----- mirR 23 7
-----CACATTGCCAGGGATTTC AAC----- mirR 24 6
-----ACATTGCCAGGGATTTC AAC----- mirR 23 3
-----CAAATCACATTGCCAGGGATTTC C----- mirR 24 3
-----AAATCACATTGCCAGGGATTTC AAC----- mirR 26 2
-----CAAATCACATTGCCAGGGATTT----- mirR 22 1
-----CAAATCACATTGCCAGGGATTTC CA----- mirR 25 1
-----AAATCACATTGCCAGGGATTT----- mirR 22 1
-----CAAATCACATTGCCAGGGATTT----- mirR 23 1
-----CAAATCACATTGCCAGGGATTTC CA----- mirR 26 1
-----CTGACCCTGTGCTCTGCCTTGGGGGCTCCTGTC morR 33 7
-----CTGACCCTGTGCTCTGCCTTGGGGGCT----- morR 27 6
-----CTGACCCTGTGCTCTGCCTTGGGGGCTC----- morR 29 4
-----CCAAGTACCCTGTGCTC----- morR 18 2
-----CTGACCCTGTGCTCTGCCTTG----- morR 21 2
-----CTGACCCTGTGCTCTGCC----- morR 18 2

```

```

-----CTGACCCTGTGCTCTGCCTTGGGGGCTCCT--- morR 30 2
-----ACTGACCCTGTGCTCTGC----- morR 18 1
-----GACCCTGTGCTCTGCCTT----- morR 18 1
-----AACTGACCCTGTGCTCTG----- morR 18 1
-----CAACTGACCCTGTGCTCT----- morR 18 1
-----CTGACCCTGTGCTCTGCCTTGGGGG----- morR 26 1

```

>mmu-mir-23b

| Sequence                                                                                                                  | Species | Len | Read |
|---------------------------------------------------------------------------------------------------------------------------|---------|-----|------|
| TGGTGCTGCCCTCACCTGCTCTGGCTGCTTGGGTTCTGGCATGCTGATTTGTGACTTGAGATTAATAACACATTGCCAGGGATTACCACGCAACCATGACCTTGGCTGCTCCTGCAGAACC | species | len | read |
| -----CTCACCTGCTCTGGCTGCTT-----                                                                                            | morL    | 20  | 58   |
| -----CACCTGCTCTGGCTGCTT-----                                                                                              | morL    | 18  | 21   |
| -----TCACCTGCTCTGGCTGCTT-----                                                                                             | morL    | 19  | 12   |
| -----CCCTCACCTGCTCTGGCTGCTT-----                                                                                          | morL    | 22  | 9    |
| -----TCACCTGCTCTGGCTGCTTG-----                                                                                            | morL    | 20  | 8    |
| -----CCTCACCTGCTCTGGCTGCTT-----                                                                                           | morL    | 21  | 6    |
| -----GCCCTCACCTGCTCTGGCTGCTT-----                                                                                         | morL    | 23  | 5    |
| -----CTCACCTGCTCTGGCTGCTTG-----                                                                                           | morL    | 21  | 4    |
| -----CTCACCTGCTCTGGCTGC-----                                                                                              | morL    | 18  | 4    |
| -----ACCTGCTCTGGCTGCTTGG-----                                                                                             | morL    | 19  | 2    |
| -----CTGCCCTCACCTGCTCTGGCTGCTT-----                                                                                       | morL    | 25  | 2    |
| -----CACCTGCTCTGGCTGCTTGG-----                                                                                            | morL    | 20  | 1    |
| -----CCCTCACCTGCTCTGGCTGCTTG-----                                                                                         | morL    | 23  | 1    |
| -----GCCCTCACCTGCTCTGGCTGCTTG-----                                                                                        | morL    | 24  | 1    |
| -----CTCACCTGCTCTGGCTGCT-----                                                                                             | morL    | 19  | 1    |
| -----CTGCTCTGGCTGCTTGGG-----                                                                                              | morL    | 18  | 1    |
| -----CCCTCACCTGCTCTGGCTG-----                                                                                             | morL    | 19  | 1    |
| -----CACCTGCTCTGGCTGCTTG-----                                                                                             | morL    | 19  | 1    |
| TGGTGCTGCCCTCACCTGCTCTGGCTG-----                                                                                          | morL    | 27  | 1    |
| -----TCACCTGCTCTGGCTGCTTGG-----                                                                                           | morL    | 21  | 1    |
| -----GGGTTCCCTGGCATGCTGATT-----                                                                                           | mirL    | 21  | 4468 |
| -----GGGTTCCCTGGCATGCTGATT-----                                                                                           | mirL    | 20  | 1521 |
| -----TGGGTTCCCTGGCATGCTGATT-----                                                                                          | mirL    | 22  | 623  |
| -----GGGTTCCCTGGCATGCTGATTG-----                                                                                          | mirL    | 22  | 473  |
| -----TGGGTTCCCTGGCATGCTGATT-----                                                                                          | mirL    | 21  | 134  |
| -----GGGTTCCCTGGCATGCTGAT-----                                                                                            | mirL    | 19  | 116  |
| -----GGGTTCCCTGGCATGCTGATTGT-----                                                                                         | mirL    | 23  | 64   |
| -----TGGGTTCCCTGGCATGCTGATTG-----                                                                                         | mirL    | 23  | 33   |
| -----GGGTTCCCTGGCATGCTGATTGTG-----                                                                                        | mirL    | 24  | 30   |
| -----GGGTTCCCTGGCATGCTGA-----                                                                                             | mirL    | 18  | 25   |
| -----GGTTCCCTGGCATGCTGATT-----                                                                                            | mirL    | 20  | 19   |
| -----TGGGTTCCCTGGCATGCTGAT-----                                                                                           | mirL    | 20  | 16   |
| -----GGTTCCCTGGCATGCTGAT-----                                                                                             | mirL    | 18  | 8    |
| -----GTTCCCTGGCATGCTGATT-----                                                                                             | mirL    | 19  | 7    |
| -----GGTTCCCTGGCATGCTGATT-----                                                                                            | mirL    | 19  | 6    |
| -----TGGGTTCCCTGGCATGCTG-----                                                                                             | mirL    | 18  | 5    |
| -----TGGGTTCCCTGGCATGCTGA-----                                                                                            | mirL    | 19  | 4    |

```

-----GTTCTGGCATGCTGATT----- mirL 18 3
-----TTCCTGGCATGCTGATT----- mirL 18 3
-----GTTCTGGCATGCTGATTG----- mirL 20 1
-----GGTTCCTGGCATGCTGATTG----- mirL 21 1
-----GTGACTTGAGATTAATAAT----- loop 18 1
-----GTGACTTGAGATTAATAATC----- loop 19 1
-----ATCACATTGCCAGGGATTACCACG----- mirR 24 752721
-----ATCACATTGCCAGGGATTACCA----- mirR 22 542587
-----ATCACATTGCCAGGGATTACCAC----- mirR 23 347301
-----ATCACATTGCCAGGGATTACC----- mirR 21 135925
-----TCACATTGCCAGGGATTACCACG----- mirR 23 78450
-----ATCACATTGCCAGGGATTACCACGC----- mirR 25 62436
-----ATCACATTGCCAGGGATTAC----- mirR 20 56813
-----TCACATTGCCAGGGATTACCA----- mirR 21 16203
-----TCACATTGCCAGGGATTACCAC----- mirR 22 10701
-----TCACATTGCCAGGGATTACCACGC----- mirR 24 10036
-----ATCACATTGCCAGGGATTA----- mirR 19 7453
-----CACATTGCCAGGGATTACCACG----- mirR 22 3196
-----TCACATTGCCAGGGATTACC----- mirR 20 1707
-----CACATTGCCAGGGATTACCA----- mirR 20 1606
-----AATCACATTGCCAGGGATTACCA----- mirR 23 1542
-----TCACATTGCCAGGGATTAC----- mirR 19 1527
-----CACATTGCCAGGGATTACCAC----- mirR 21 1175
-----AATCACATTGCCAGGGATTACC----- mirR 22 1024
-----AATCACATTGCCAGGGATTACCAC----- mirR 24 953
-----ACATTGCCAGGGATTACCACG----- mirR 21 771
-----ACATTGCCAGGGATTACCAC----- mirR 20 659
-----TCACATTGCCAGGGATTACCACGCA----- mirR 25 626
-----ACATTGCCAGGGATTACCA----- mirR 19 558
-----AATCACATTGCCAGGGATTACCACG----- mirR 25 486
-----CACATTGCCAGGGATTACC----- mirR 19 350
-----AATCACATTGCCAGGGATTAC----- mirR 21 350
-----CACATTGCCAGGGATTACCACGC----- mirR 23 332
-----ACATTGCCAGGGATTACC----- mirR 18 130
-----CACATTGCCAGGGATTAC----- mirR 18 125
-----ACATTGCCAGGGATTACCACGC----- mirR 22 120
-----AATCACATTGCCAGGGATTA----- mirR 20 69
-----AATCACATTGCCAGGGATTACCACGC----- mirR 26 65
-----CACATTGCCAGGGATTACCACGCA----- mirR 24 41
-----AAAATCACATTGCCAGGGATTACCA----- mirR 25 9
-----AAATCACATTGCCAGGGATTACCACG----- mirR 26 9
-----AAATCACATTGCCAGGGATTACCA----- mirR 24 5
-----ACATTGCCAGGGATTACCACGCA----- mirR 23 4
-----AAATCACATTGCCAGGGATTACCAC----- mirR 25 2
-----AAATCACATTGCCAGGGATTACC----- mirR 23 2
-----AAAATCACATTGCCAGGGATTACCACG----- mirR 27 1

```

```

-----AAATCACATTGCCAGGGATTAC----- mirR 22 1
-----AAAATCACATTGCCAGGGATTACCAC----- mirR 26 1
-----GCAACCATGACCTTGGCTGCTCCTGCAGAAC- morR 31 4
-----GCAACCATGACCTTGGCTGCTCCTGCAGAAC morR 32 1

>mmu-mir-214
CCTGGCTGGACAGAGTTGTCATGTGTCTGCCTGTCTACACTTGCTGTGCAGAACATCCGCTCACCTGTACAGCAGGCACAGACAGGCAGTACATGACAACCCAGCCTGAATGACCACCAGCC species len rea
-----CAGAGTTGTCATGTGTCT----- morL 18 172
-----ACAGAGTTGTCATGTGTCT----- morL 19 44
-----GACAGAGTTGTCATGTGTCT----- morL 20 15
-----AGAGTTGTCATGTGTCTG----- morL 18 13
-----AGAGTTGTCATGTGTCTGC----- morL 19 6
-----CAGAGTTGTCATGTGTCTG----- morL 19 6
-----GGACAGAGTTGTCATGTGTCT----- morL 21 4
-----TGGACAGAGTTGTCATGTGTCT----- morL 22 2
-----ACAGAGTTGTCATGTGTCTG----- morL 20 2
-----ACAGAGTTGTCATGTGTCT----- morL 18 2
CCTGGCTGGACAGAGTTGTCATGTGTCT----- morL 28 2
-----GAGTTGTCATGTGTCTGC----- morL 18 1
-----GACAGAGTTGTCATGTGTCT----- morL 19 1
-CTGGCTGGACAGAGTTGTCATGTGTCT----- morL 27 1
-----GGACAGAGTTGTCATGTGTCT----- morL 20 1
-----TGCCTGTCTACACTTGCTGTGC----- mirL 22 16311
-----GCCTGTCTACACTTGCTGTGC----- mirL 21 15010
-----GCCTGTCTACACTTGCTGTGCA----- mirL 22 4262
-----TGCCTGTCTACACTTGCTGTG----- mirL 21 2028
-----GCCTGTCTACACTTGCTGTG----- mirL 20 2003
-----TGCCTGTCTACACTTGCTGTGCA----- mirL 23 283
-----GCCTGTCTACACTTGCTGTGCAG----- mirL 23 266
-----TGCCTGTCTACACTTGCTG----- mirL 19 265
-----TGCCTGTCTACACTTGCTGT----- mirL 20 264
-----GCCTGTCTACACTTGCTGT----- mirL 19 235
-----GCCTGTCTACACTTGCTG----- mirL 18 184
-----GCCTGTCTACACTTGCTGTGCAGA----- mirL 24 174
-----TGCCTGTCTACACTTGCT----- mirL 18 96
-----CTGTCTACACTTGCTGTGCAGA----- mirL 22 94
-----CCTGTCTACACTTGCTGTGCAGA----- mirL 23 89
-----TGCCTGTCTACACTTGCTGTGCAG----- mirL 24 50
-----CTGCCTGTCTACACTTGCTGTGC----- mirL 23 46
-----CCTGTCTACACTTGCTGTGCAGAA----- mirL 24 19
-----CTGTCTACACTTGCTGTGCAGAA----- mirL 23 18
-----CTGTCTACACTTGCTGTGCAGAAC----- mirL 24 15
-----GTCTGCCTGTCTACACTTGCT----- mirL 21 13
-----CTGCCTGTCTACACTTGCTGTG----- mirL 22 13
-----CCTGTCTACACTTGCTGTGCAGAAC----- mirL 25 11
-----CTGTCTACACTTGCTGTGC----- mirL 19 10

```



```

-----CCTGTCTACACTTGCTGTGC----- mirL 20 9
-----CTGCCTGTCTACACTTGCT----- mirL 19 9
-----TCTGCCTGTCTACACTTGCTGTGC----- mirL 24 7
-----CTGCCTGTCTACACTTGCTGT----- mirL 21 5
-----CCTGTCTACACTTGCTGTGCAG----- mirL 22 4
-----CTGTCTACACTTGCTGTGCAG----- mirL 21 3
-----CTGCCTGTCTACACTTGCTGTGCA----- mirL 24 2
-----CCTGTCTACACTTGCTGTG----- mirL 19 2
-----CCTGTCTACACTTGCTGTGCA----- mirL 21 2
-----TCTGCCTGTCTACACTTGCTGTG----- mirL 23 2
-----TCTGCCTGTCTACACTTGCTGT----- mirL 22 2
-----TCTGCCTGTCTACACTTGCTGTGCA----- mirL 25 1
-----CTGCCTGTCTACACTTGCTG----- mirL 20 1
-----AGAACATCCGCTCACCTGT----- loop 19 597
-----GAACATCCGCTCACCTGT----- loop 18 102
-----CAGAACATCCGCTCACCTGTA----- loop 21 19
-----AGAACATCCGCTCACCTG----- loop 18 15
-----AGAACATCCGCTCACCTGTA----- loop 20 10
-----AGAACATCCGCTCACCTGTAC----- loop 21 4
-----CAGAACATCCGCTCACCTGT----- loop 20 4
-----CAGAACATCCGCTCACCTGTAC----- loop 22 3
-----GAACATCCGCTCACCTGTAC----- loop 20 2
-----CAGAACATCCGCTCACCTGTACA----- loop 23 2
-----GAACATCCGCTCACCTGTA----- loop 19 2
-----AACATCCGCTCACCTGTACA----- loop 20 1
-----CAGAACATCCGCTCACCT----- loop 18 1
-----GAACATCCGCTCACCTGTACA----- loop 21 1
-----ACATCCGCTCACCTGTAC----- loop 18 1
-----AGAACATCCGCTCACCTGTACA----- loop 22 1
-----ACAGCAGGCACAGACAGGCAGT----- mirR 22 682306
-----ACAGCAGGCACAGACAGGCAG----- mirR 21 327634
-----ACAGCAGGCACAGACAGGCAGTC----- mirR 23 200023
-----ACAGCAGGCACAGACAGGCAGTCA----- mirR 24 194848
-----TACAGCAGGCACAGACAGGCAGT----- mirR 23 176452
-----TACAGCAGGCACAGACAGGCAG----- mirR 22 100830
-----ACAGCAGGCACAGACAGGCA----- mirR 20 48939
-----ACAGCAGGCACAGACAGGCAGTCAC----- mirR 25 48135
-----TACAGCAGGCACAGACAGGCAGTC----- mirR 24 46833
-----TACAGCAGGCACAGACAGGCA----- mirR 21 30895
-----TACAGCAGGCACAGACAGG----- mirR 19 30033
-----TACAGCAGGCACAGACAGGCAGTCA----- mirR 25 26807
-----TACAGCAGGCACAGACAGGC----- mirR 20 16574
-----ACAGCAGGCACAGACAGGC----- mirR 19 13340
-----GTACAGCAGGCACAGACAGGCAGT----- mirR 24 9331
-----GTACAGCAGGCACAGACAGGCAG----- mirR 23 4983
-----GTACAGCAGGCACAGACAGGCAGTC----- mirR 25 2148

```

C:\Documents and Settings\hong\Desktop\Reprogramming-total RNA.txt

```
-----GTACAGCAGGCACAGACAGGCA----- mirR 22 1912
-----CAGCAGGCACAGACAGGCAGTC----- mirR 22 1621
-----CAGCAGGCACAGACAGGCAGTCA----- mirR 23 1591
-----GTACAGCAGGCACAGACAGGCAGTCA----- mirR 26 1428
-----CAGCAGGCACAGACAGGCAGT----- mirR 21 995
-----GTACAGCAGGCACAGACAGG----- mirR 20 952
-----GTACAGCAGGCACAGACAGGC----- mirR 21 730
-----CAGCAGGCACAGACAGGCAGTCAC----- mirR 24 390
-----CAGCAGGCACAGACAGGCAG----- mirR 20 260
-----AGCAGGCACAGACAGGCAGT----- mirR 20 107
-----TGTACAGCAGGCACAGACAGGCA----- mirR 23 63
-----AGCAGGCACAGACAGGCAG----- mirR 19 56
-----GCAGGCACAGACAGGCAGT----- mirR 19 54
-----CAGCAGGCACAGACAGGCA----- mirR 19 45
-----GCAGGCACAGACAGGCAG----- mirR 18 43
-----CAGCAGGCACAGACAGGCAGTCACA----- mirR 25 31
-----TGTACAGCAGGCACAGACAGGCAG----- mirR 24 30
-----GCAGGCACAGACAGGCAGTC----- mirR 20 30
-----AGCAGGCACAGACAGGCAGTC----- mirR 21 27
-----AGCAGGCACAGACAGGCAGTCA----- mirR 22 22
-----TGTACAGCAGGCACAGACAGGC----- mirR 22 22
-----GCAGGCACAGACAGGCAGTCA----- mirR 21 22
-----TGTACAGCAGGCACAGACAGG----- mirR 21 19
-----AGCAGGCACAGACAGGCA----- mirR 18 11
-----TGTACAGCAGGCACAGACAGGCAGTC----- mirR 26 11
-----TGTACAGCAGGCACAGACAGGCAGT----- mirR 25 9
-----TGTACAGCAGGCACAGACAG----- mirR 20 4
-----GCAGGCACAGACAGGCAGTCAC----- mirR 22 4
-----TCACATGACAACCCAGCCTGAATGACCACCAGC----- morR 33 52
-----TCACATGACAACCCAGCCTGA----- morR 21 51
-----TCACATGACAACCCAGCCTGAATGACCACCAGCC----- morR 34 46
-----TCACATGACAACCCAGCCTGAATGACCACC----- morR 30 34
-----TCACATGACAACCCAGCCTGAAT----- morR 23 18
-----TCACATGACAACCCAGCCTGAATGA----- morR 25 15
-----CACATGACAACCCAGCCTGAATGACCACCAGCC----- morR 33 13
-----TCACATGACAACCCAGCCTGAATGAC----- morR 26 13
-----CACATGACAACCCAGCCTGAATGACCACC----- morR 29 6
-----CACATGACAACCCAGCCTGAATGACCACCAG----- morR 31 3
-----GTCACATGACAACCCAGC----- morR 18 2
-----CACATGACAACCCAGCCTG----- morR 19 1
-----CACATGACAACCCAGCCTGA----- morR 20 1
-----CACATGACAACCCAGCCTGAATGACCAC----- morR 28 1
-----CACATGACAACCCAGCCTGAATGACCACCAGC----- morR 32 1
```

>mmu-mir-130b

GTGAGACTGACAGGCTTGTTGGACACTCTTTCCCTGTTGCACTACTGTGGGCCCTCTGGGAAGCAGTGCAATGATGAAAGGGCATCTGTGCGGGCCAGCTAAGGAGCC species len reads

```

-----GACTGACAGGCTTGTTGGAC----- morL 20 26
-----GACTGACAGGCTTGTTGGACA----- morL 21 19
-----ACTGACAGGCTTGTTGGACA----- morL 20 13
-----ACTGACAGGCTTGTTGGAC----- morL 19 10
GTGAGACTGACAGGCTTGTTGGAC----- morL 24 7
---AGACTGACAGGCTTGTTGGACA----- morL 22 6
---GACTGACAGGCTTGTTGGACAC----- morL 22 5
-----CTGACAGGCTTGTTGGACA----- morL 19 4
---CTGACAGGCTTGTTGGAC----- morL 18 4
---AGACTGACAGGCTTGTTGGA----- morL 20 3
---ACTGACAGGCTTGTTGGA----- morL 18 3
---AGACTGACAGGCTTGTTGGAC----- morL 21 3
---AGACTGACAGGCTTGTTG----- morL 18 2
---GACTGACAGGCTTGTTGGA----- morL 19 2
-----TGACAGGCTTGTTGGACA----- morL 18 2
--GAGACTGACAGGCTTGTTGGACA----- morL 23 2
--GAGACTGACAGGCTTGTTGGA----- morL 21 1
GTGAGACTGACAGGCTTGTTGG----- morL 22 1
-----ACAGGCTTGTTGGACACT----- morL 18 1
-TGAGACTGACAGGCTTGTTGGACA----- morL 24 1
-----TGACAGGCTTGTTGGACAC----- morL 19 1
-----ACTGACAGGCTTGTTGGACACT----- morL 22 1
GTGAGACTGACAGGCTTGTTGGA----- morL 23 1
--GAGACTGACAGGCTTGTTGGAC----- morL 22 1
-TGAGACTGACAGGCTTGTTGGA----- morL 22 1
-----ACTCTTTCCTGTTGCACTACT----- mirL 22 66623
-----ACTCTTTCCTGTTGCACTAC----- mirL 21 13040
-----ACTCTTTCCTGTTGCACTA----- mirL 20 3338
-----ACTCTTTCCTGTTGCACTACTG----- mirL 23 3277
-----CACTCTTTCCTGTTGCACTAC----- mirL 22 1951
-----ACTCTTTCCTGTTGCACT----- mirL 19 783
-----ACTCTTTCCTGTTGCACTACTGT----- mirL 24 466
-----CACTCTTTCCTGTTGCACTACT----- mirL 23 448
-----CACTCTTTCCTGTTGCACTA----- mirL 21 410
-----CACTCTTTCCTGTTGCA----- mirL 18 141
-----ACTCTTTCCTGTTGCAC----- mirL 18 101
-----CACTCTTTCCTGTTGCACT----- mirL 20 95
-----CTCTTTCCTGTTGCACTACT----- mirL 21 79
-----CTTTCCTGTTGCACTACT----- mirL 19 35
-----ACACTCTTTCCTGTTGCA----- mirL 19 33
-----TCTTTCCTGTTGCACTACT----- mirL 20 31
-----CTCTTTCCTGTTGCACTAC----- mirL 20 18
-----GACACTCTTTCCTGTTGCACTAC----- mirL 24 14
-----CACTCTTTCCTGTTGCACTACTG----- mirL 24 9
-----CTCTTTCCTGTTGCACTA----- mirL 19 8
-----GACACTCTTTCCTGTTGCACTACT----- mirL 25 6

```

```

-----TCTTCCCTGTTGCACTA----- mirL 18 4
-----ACACTCTTCCCTGTTGC----- mirL 18 4
-----GACTCTTCCCTGTTG----- mirL 18 3
-----CTTCCCTGTTGCACTAC----- mirL 18 2
-----CACTCTTCCCTGTTGCAC----- mirL 19 2
-----CTCTTCCCTGTTGCACT----- mirL 18 2
-----ACACTCTTCCCTGTTGCACTA----- mirL 22 1
-----CTTCCCTGTTGCACTACTGT----- mirL 21 1
-----TCTTCCCTGTTGCACTAC----- mirL 19 1
-----ACACTCTTCCCTGTTGCACTACT----- mirL 24 1
-----GTGGCCCTCTGGGAAGCA----- loop 18 7
-----ACTGTGGCCCTCTGGGAAGCA----- loop 21 5
-----GTGGCCCTCTGGGAAGCAG----- loop 19 5
-----ACTGTGGCCCTCTGGGAA----- loop 18 1
-----ACTGTGGCCCTCTGGGAAG----- loop 19 1
-----TGTGGCCCTCTGGGAAGC----- loop 18 1
-----ACTGTGGCCCTCTGGGAAGCAG----- loop 22 1
-----CAGTGCAATGATGAAAGGGCAT----- mirR 22 1751530
-----CAGTGCAATGATGAAAGGGCATC----- mirR 23 68074
-----CAGTGCAATGATGAAAGGGCA----- mirR 21 42749
-----CAGTGCAATGATGAAAGGGCATCT----- mirR 24 27920
-----CAGTGCAATGATGAAAGGGC----- mirR 20 9150
-----AGTGCAATGATGAAAGGGCAT----- mirR 21 8261
-----GTGCAATGATGAAAGGGCAT----- mirR 20 4956
-----CAGTGCAATGATGAAAGGGCATCTG----- mirR 25 2218
-----AGTGCAATGATGAAAGGGCATC----- mirR 22 1557
-----CAGTGCAATGATGAAAGGG----- mirR 19 1212
-----TGCAATGATGAAAGGGCAT----- mirR 19 986
-----GCAGTGCAATGATGAAAGGGCAT----- mirR 23 597
-----AGTGCAATGATGAAAGGGCATCT----- mirR 23 352
-----AGTGCAATGATGAAAGGGCA----- mirR 20 301
-----GTGCAATGATGAAAGGGCATCT----- mirR 22 85
-----GTGCAATGATGAAAGGGCA----- mirR 19 49
-----AGTGCAATGATGAAAGGGC----- mirR 19 31
-----GCAGTGCAATGATGAAAGGGCA----- mirR 22 27
-----GTGCAATGATGAAAGGGCATC----- mirR 21 20
-----GCAGTGCAATGATGAAAGGGC----- mirR 21 12
-----TGCAATGATGAAAGGGCATC----- mirR 20 10
-----AGTGCAATGATGAAAGGGCATCTG----- mirR 24 9
-----AGTGCAATGATGAAAGGG----- mirR 18 6
-----GTGCAATGATGAAAGGGC----- mirR 18 6
-----TGCAATGATGAAAGGGCA----- mirR 18 5
-----GCAGTGCAATGATGAAAGGGCATC----- mirR 24 5
-----TGCAATGATGAAAGGGCATCT----- mirR 21 4
-----AAGCAGTGCAATGATGAAAGGGCATC----- mirR 26 3
-----AGCAGTGCAATGATGAAAGGGC----- mirR 22 3

```

```

-----AAGCAGTGCAATGATGAAAGGG----- mirR 22 3
-----AAGCAGTGCAATGATGAAAGGGC----- mirR 23 3
-----AAGCAGTGCAATGATGAAAGGGCA----- mirR 24 2
-----AGCAGTGCAATGATGAAAGGGCAT----- mirR 24 2
-----AAGCAGTGCAATGATGAAAGGGCAT----- mirR 25 2
-----GCAGTGCAATGATGAAAGGGCATCT----- mirR 25 1
-----GCAGTGCAATGATGAAAG----- mirR 18 1
-----AGCAGTGCAATGATGAAA----- mirR 18 1
-----AGCAGTGCAATGATGAAAGGGCATC----- mirR 25 1
-----TGCAATGATGAAAGGGCATCTG----- mirR 22 1
-----AAGCAGTGCAATGATGAAAGGGCATCTG----- mirR 28 1
-----TGTCCGGCCAGCTAAGGAG----- morR 19 2
-----TCGGGCCAGCTAAGGAGCC----- morR 19 1
-----TCGGGCCAGCTAAGGAGC----- morR 18 1

```

>mmu-mir-92a-1

| ACAGGTTGGGATTTGTCGCAATGCTGTGTTTCTCTGTATGGTATTGCACTTGTCCCGGCCTGTTGAGTTTGGTGGGGATTGTGACCAGAAGATGTGAA | species | len | reads   |
|----------------------------------------------------------------------------------------------------|---------|-----|---------|
| --AGGTTGGGATTTGTCGCAATGCT                                                                          | mirL    | 23  | 29244   |
| --AGGTTGGGATTTGTCGCAATGC                                                                           | mirL    | 22  | 4049    |
| --AGGTTGGGATTTGTCGCAATG                                                                            | mirL    | 21  | 1630    |
| --AGGTTGGGATTTGTCGCAATGCTG                                                                         | mirL    | 24  | 750     |
| --AGGTTGGGATTTGTCGCAAT                                                                             | mirL    | 20  | 357     |
| --AGGTTGGGATTTGTCGCAATGCTGT                                                                        | mirL    | 25  | 132     |
| --AGGTTGGGATTTGTCGCA                                                                               | mirL    | 18  | 101     |
| ---GGTTGGGATTTGTCGCAATGCT                                                                          | mirL    | 22  | 53      |
| ---TTGGGATTTGTCGCAATGCT                                                                            | mirL    | 20  | 13      |
| -CAGGTTGGGATTTGTCGCAATGCT                                                                          | mirL    | 24  | 7       |
| ---GTTGGGATTTGTCGCAATGCTGTGTTTC                                                                    | mirL    | 28  | 4       |
| ---GGTTGGGATTTGTCGCAATGC                                                                           | mirL    | 21  | 3       |
| ---GGTTGGGATTTGTCGCAATGCTG                                                                         | mirL    | 23  | 2       |
| ---GTTGGGATTTGTCGCAATGCT                                                                           | mirL    | 21  | 2       |
| ---GGTTGGGATTTGTCGCAATG                                                                            | mirL    | 20  | 2       |
| ---TTGGGATTTGTCGCAATG                                                                              | mirL    | 18  | 2       |
| ACAGGTTGGGATTTGTCGC                                                                                | mirL    | 19  | 1       |
| ---GGTTGGGATTTGTCGCAATGCTGT                                                                        | mirL    | 24  | 1       |
| ACAGGTTGGGATTTGTCG                                                                                 | mirL    | 18  | 1       |
| ---GGTTGGGATTTGTCGCAAT                                                                             | mirL    | 19  | 1       |
| -----CTGTGTTTCTCTGTATGGTA-----                                                                     | loop    | 20  | 3       |
| -----GCTGTGTTTCTCTGTATGGT-----                                                                     | loop    | 20  | 2       |
| -----GCTGTGTTTCTCTGTATG-----                                                                       | loop    | 18  | 2       |
| -----GTGTTTCTCTGTATGGTA-----                                                                       | loop    | 18  | 1       |
| -----TATTGCACTTGTCCCGGCCTGT-----                                                                   | mirR    | 22  | 1534637 |
| -----TATTGCACTTGTCCCGGCCTGTTG-----                                                                 | mirR    | 24  | 107896  |
| -----TATTGCACTTGTCCCGGCCTGTT-----                                                                  | mirR    | 23  | 81187   |
| -----ATTGCACTTGTCCCGGCCTGT-----                                                                    | mirR    | 21  | 57642   |
| -----TATTGCACTTGTCCCGGCCTG-----                                                                    | mirR    | 21  | 40788   |

```

-----TATTGCACTTGTCCCGGCCTGTTGA----- mirR 25 10233
-----ATTGCACTTGTCCCGGCCTGTTG----- mirR 23 9359
-----TATTGCACTTGTCCCGGCCT----- mirR 20 8788
-----TATTGCACTTGTCCCGGC----- mirR 18 7373
-----ATTGCACTTGTCCCGGCCTGTT----- mirR 22 5852
-----ATTGCACTTGTCCCGGCCTG----- mirR 20 3208
-----ATTGCACTTGTCCCGGCCT----- mirR 19 738
-----ATTGCACTTGTCCCGGC----- mirR 18 376
-----ATTGCACTTGTCCCGGCCTGTTGA----- mirR 24 331
-----TTGCACTTGTCCCGGCCTGT----- mirR 20 229
-----TGCACCTTGTCCCGGCCTGT----- mirR 19 183
-----GTATTGCACTTGTCCCGGCCTGT----- mirR 23 181
-----TTGCACTTGTCCCGGCCTGTTG----- mirR 22 138
-----TTGCACTTGTCCCGGCCTGTT----- mirR 21 60
-----TTGCACTTGTCCCGGCCTGTTGA----- mirR 23 40
-----TGCACCTTGTCCCGGCCTGTTG----- mirR 21 28
-----GGTATTGCACTTGTCCCGGCCTGT----- mirR 24 17
-----TGCACCTTGTCCCGGCCTG----- mirR 18 17
-----GTATTGCACTTGTCCCGGCCTGTT----- mirR 24 13
-----TGCACCTTGTCCCGGCCTGTT----- mirR 20 11
-----TTGCACTTGTCCCGGCCTG----- mirR 19 10
-----GTATTGCACTTGTCCCGGCCTGTTG----- mirR 25 7
-----GTATTGCACTTGTCCCGGCCTG----- mirR 22 7
-----TGGTATTGCACTTGTCCCGGCCTGT----- mirR 25 6
-----GTATTGCACTTGTCCCGGCCT----- mirR 21 5
-----TTGCACTTGTCCCGGCCT----- mirR 18 5
-----GGTATTGCACTTGTCCCGGCCT----- mirR 22 5
-----TGCACCTTGTCCCGGCCTGTTGA----- mirR 22 4
-----GTATTGCACTTGTCCCG----- mirR 18 3
-----GTATTGCACTTGTCCCGGC----- mirR 19 3
-----TGGTATTGCACTTGTCCC----- mirR 18 3
-----GGTATTGCACTTGTCCCGGCCTGTT----- mirR 25 2
-----TGGTATTGCACTTGTCCCG----- mirR 19 1
-----TGGTATTGCACTTGTCCCGGC----- mirR 22 1
-----GGTATTGCACTTGTCCCG----- mirR 18 1
-----TGAGTTTGGTGGGGATTGTGACCAGAAGATGT--- morR 32 15
-----TGAGTTTGGTGGGGATTG----- morR 18 11
-----TGAGTTTGGTGGGGATTGTG----- morR 20 9
-----TGAGTTTGGTGGGGATTGTGACCAGAAGATGTGAA morR 35 8
-----TGAGTTTGGTGGGGATTGTGACCAGAAGAT----- morR 30 7
-----TGAGTTTGGTGGGGATTGTGACCAGAAG----- morR 28 7
-----TGAGTTTGGTGGGGATTGTGACCAGAAGATGTGA- morR 34 4
-----GAGTTTGGTGGGGATTGT----- morR 18 1
-----AGTTTGGTGGGGATTGTG----- morR 18 1
-----GTTGAGTTTGGTGGGGAT----- morR 18 1
-----TTGAGTTTGGTGGGGATTGT----- morR 20 1

```

```

-----AGTTTGGTGGGGATTGTGA----- morR 19 1

>mmu-mir-19b-1
CCAACCTGCTCTGTTATTGAGCACTGGTCTATGGTTAGTTTTCAGGTTTGCATCCAGCTGTATAATATTCTGCTGTGCAAATCCATGCAAACTGACT species len reads
-----TATTGAGCACTGGTCTATGGTT----- morL 22 115
-----CCTGTTATTGAGCACTGGTCTATGGTT----- morL 27 33
-----TCCTGTTATTGAGCACTGGTCTATGGTT----- morL 28 17
-----GTTATTGAGCACTGGTCTATGGTT----- morL 24 17
-----TTGAGCACTGGTCTATGGTT----- morL 20 16
-----ATTGAGCACTGGTCTATGGTT----- morL 21 13
-----GTCCTGTTATTGAGCACTGGTCTATGGTT----- morL 29 10
-CAACCTGCTCTGTTATTGAGCACTGGTCTATGGTTA----- morL 35 10
-----ATTGAGCACTGGTCTATGG----- morL 19 4
CCAACCTGCTCTGTTATTGAGCACTGGTCTATGGTT----- morL 34 3
-----TGAGCACTGGTCTATGGTTA----- morL 20 2
-----TTGAGCACTGGTCTATGGTTA----- morL 21 1
-----TATTGAGCACTGGTCTATGG----- morL 20 1
-----TTGAGCACTGGTCTATGG----- morL 18 1
-----TGAGCACTGGTCTATGGT----- morL 18 1
-----ATTGAGCACTGGTCTATGGTTA----- morL 22 1
-----CCTGTTATTGAGCACTGGTCTATGG----- morL 25 1
-----GAGCACTGGTCTATGGTTA----- morL 19 1
-----AGTTTTGCAGGTTTGCATCCAGC----- mirL 23 9694
-----AGTTTTGCAGGTTTGCATCCAG----- mirL 22 1955
-----AGTTTTGCAGGTTTGCATCCAGCT----- mirL 24 1548
-----AGTTTTGCAGGTTTGCATCCA----- mirL 21 457
-----AGTTTTGCAGGTTTGCATCC----- mirL 20 256
-----AGTTTTGCAGGTTTGCATCCAGCTG----- mirL 25 164
-----AGTTTTGCAGGTTTGCATC----- mirL 19 75
-----GTTTTGCAGGTTTGCATCCAGC----- mirL 22 21
-----TTTTGCAGGTTTGCATCCAGC----- mirL 21 5
-----TTTTGCAGGTTTGCATCCAGCT----- mirL 22 2
-----TAGTTTTGCAGGTTTGCATCCAG----- mirL 23 2
-----TTAGTTTTGCAGGTTTGCATCCAGC----- mirL 25 2
-----TTTGCAGGTTTGCATCCAGC----- mirL 20 2
-----TTTTGCAGGTTTGCATCCAG----- mirL 20 1
-----TAGTTTTGCAGGTTTGCAT----- mirL 19 1
-----GTTTTGCAGGTTTGCATCCAGCT----- mirL 23 1
-----TTTTGCAGGTTTGCATCCAGCTGT----- mirL 24 1
-----TTTGCAGGTTTGCATCCAGCTG----- mirL 22 1
-----GTTTTGCAGGTTTGCATC----- mirL 18 1
-----TGTATAATATTCTGCTGT----- loop 18 5
-----CTGTATAATATTCTGCTG----- loop 18 1
-----TGTGCAAATCCATGCAAACTGA-- mirR 23 1425524
-----TGTGCAAATCCATGCAAACTG-- mirR 22 205482
-----GTGCAAATCCATGCAAACTGA-- mirR 22 31861

```

```

-----TGTGCAAATCCATGCAAAACT---- mirR 21 22727
-----TGTGCAAATCCATGCAAAACTGAC- mirR 24 18390
-----CTGTGCAAATCCATGCAAAACTGA-- mirR 24 15341
-----GTGCAAATCCATGCAAAACTG--- mirR 21 5553
-----TGTGCAAATCCATGCAAAA----- mirR 19 4749
-----TGTGCAAATCCATGCAAAAAC---- mirR 20 4374
-----CTGTGCAAATCCATGCAAAACTG--- mirR 23 3720
-----TGTGCAAATCCATGCAAAACTGACT mirR 25 1861
-----CTGTGCAAATCCATGCAAAACT--- mirR 22 1089
-----GTGCAAATCCATGCAAAACTGAC- mirR 23 587
-----GTGCAAATCCATGCAAAACT--- mirR 20 572
-----GCAAATCCATGCAAAACTGA-- mirR 20 276
-----GTGCAAATCCATGCAAAA----- mirR 18 266
-----GTGCAAATCCATGCAAAAAC---- mirR 19 243
-----CTGTGCAAATCCATGCAAAACTGAC- mirR 25 134
-----GTGCAAATCCATGCAAAACTGACT mirR 24 118
-----CTGTGCAAATCCATGCAAAAAC---- mirR 21 101
-----CTGTGCAAATCCATGCAAAA----- mirR 20 87
-----GCTGTGCAAATCCATGCAAAACTGA-- mirR 25 64
-----TGCAAATCCATGCAAAACTGA-- mirR 21 42
-----GCAAATCCATGCAAAACTG--- mirR 19 31
-----CTGTGCAAATCCATGCAAAACTGACT mirR 26 24
-----GCTGTGCAAATCCATGCAAAACT--- mirR 23 15
-----GCTGTGCAAATCCATGCAAAACTG--- mirR 24 12
-----TGCAAATCCATGCAAAACTG--- mirR 20 8
-----TGCTGTGCAAATCCATGCAAAACT---- mirR 24 3
-----GCAAATCCATGCAAAACT--- mirR 18 2
-----GCAAATCCATGCAAAACTGAC- mirR 21 2
-----TGCAAATCCATGCAAAACTGACT mirR 23 1
-----TGCAAATCCATGCAAAACTGAC- mirR 22 1

```

>mmu-mir-145

```

TCTCTCTCTCTCCACCTTGTCTCCTCACGGTCCAGTTTCCAGGAATCCCTTGGATGCTAAGATGGGGATTCTCTGAAATACTGTTCTTGAGGTCATGGCTTAGCAGCTGGATCTGTCTCCC species len read
-----CTCCACCTTGTCTCCTCACG----- morL 19 90
-----TCTCCACCTTGTCTCCTCACG----- morL 20 60
-----TCTCCACCTTGTCTCA----- morL 18 35
-----CTCCACCTTGTCTCCTCAC----- morL 18 8
-CTCTCTCTCTCCACCTTGTCTCCTCACG----- morL 27 5
-----CTCCACCTTGTCTCCTCACGG----- morL 20 5
---CTCTCTCTCCACCTTGTCTCCTC----- morL 22 3
-----CTCTCCACCTTGTCTCCTC----- morL 18 3
-----CCACCTTGTCTCCTCACGGT----- morL 18 3
-----TCTCCACCTTGTCTCCTCAC----- morL 19 3
-----CTCTCCACCTTGTCTCA----- morL 19 2
-----TCTCCACCTTGTCTCCTCACGG----- morL 21 2
-----TCCACCTTGTCTCCTCACG----- morL 18 2

```



---

|                                      |      |    |        |
|--------------------------------------|------|----|--------|
| -----CTCTCTCCACCTTGTCTCAG-----       | morL | 23 | 1      |
| -----CCCACCTTGTCTCAGG-----           | morL | 18 | 1      |
| TCTCTCTCTCTCCACCTTGTCTCAG-----       | morL | 28 | 1      |
| -----TCCCACCTTGTCTCAGGT-----         | morL | 20 | 1      |
| -----CTCCCACCTTGTCTCAGGT-----        | morL | 21 | 1      |
| -----CTCTCCACCTTGTCTCAG-----         | morL | 21 | 1      |
| -----GTCCAGTTTTCCAGGAATCCCT-----     | mirL | 23 | 929993 |
| -----GTCCAGTTTTCCAGGAATCCCT-----     | mirL | 24 | 328294 |
| -----GTCCAGTTTTCCAGGAATCCCTTG-----   | mirL | 25 | 180339 |
| -----GTCCAGTTTTCCAGGAATCCC-----      | mirL | 22 | 159348 |
| -----GTCCAGTTTTCCAGGAATCC-----       | mirL | 21 | 78834  |
| -----GTCCAGTTTTCCAGGAATCCCTTGG-----  | mirL | 26 | 35946  |
| -----GTCCAGTTTTCCAGGAATC-----        | mirL | 20 | 13791  |
| -----TCCAGTTTTCCAGGAATCCCT-----      | mirL | 22 | 1865   |
| -----CCAGTTTTCCAGGAATCCCT-----       | mirL | 21 | 682    |
| -----TCCAGTTTTCCAGGAATCCCT-----      | mirL | 23 | 642    |
| -----TCCAGTTTTCCAGGAATCCCTTG-----    | mirL | 24 | 534    |
| -----TCCAGTTTTCCAGGAATCCC-----       | mirL | 21 | 281    |
| -----CCAGTTTTCCAGGAATCCCT-----       | mirL | 22 | 199    |
| -----GGTCCAGTTTTCCAGGAATCCCT-----    | mirL | 24 | 189    |
| -----TCCAGTTTTCCAGGAATCCCTTGG-----   | mirL | 25 | 120    |
| -----GGTCCAGTTTTCCAGGAATCCCT-----    | mirL | 25 | 113    |
| -----GGTCCAGTTTTCCAGGAATCCC-----     | mirL | 23 | 111    |
| -----CCAGTTTTCCAGGAATCCCTTG-----     | mirL | 23 | 111    |
| -----TCCAGTTTTCCAGGAATCC-----        | mirL | 20 | 107    |
| -----CAGTTTTCCAGGAATCCCT-----        | mirL | 20 | 103    |
| -----GGTCCAGTTTTCCAGGAATCC-----      | mirL | 22 | 82     |
| -----CGGTCCAGTTTTCCAGGAATCCCT-----   | mirL | 25 | 72     |
| -----CCAGTTTTCCAGGAATCCC-----        | mirL | 20 | 69     |
| -----CAGTTTTCCAGGAATCCCT-----        | mirL | 21 | 59     |
| -----GGTCCAGTTTTCCAGGAATCCCTTG-----  | mirL | 26 | 39     |
| -----CCAGTTTTCCAGGAATCC-----         | mirL | 19 | 35     |
| -----GGTCCAGTTTTCCAGGAATC-----       | mirL | 21 | 28     |
| -----GGTCCAGTTTTCCAGGAAT-----        | mirL | 20 | 25     |
| -----TCCAGTTTTCCAGGAATCCCTTGA-----   | mirL | 26 | 25     |
| -----CGGTCCAGTTTTCCAGGAATCCCT-----   | mirL | 26 | 21     |
| -----CAGTTTTCCAGGAATCCCTTG-----      | mirL | 22 | 16     |
| -----CGGTCCAGTTTTCCAGGAATCC-----     | mirL | 23 | 15     |
| -----CAGTTTTCCAGGAATCCC-----         | mirL | 19 | 12     |
| -----CAGTTTTCCAGGAATCCCTTGG-----     | mirL | 23 | 12     |
| -----CGGTCCAGTTTTCCAGGAAT-----       | mirL | 21 | 8      |
| -----CCAGTTTTCCAGGAATCCCTTGG-----    | mirL | 24 | 7      |
| -----CGGTCCAGTTTTCCAGGAATCCCTTG----- | mirL | 27 | 7      |
| -----CAGTTTTCCAGGAATCC-----          | mirL | 18 | 7      |
| -----CGGTCCAGTTTTCCAGGAATCCC-----    | mirL | 24 | 6      |
| -----CCAGTTTTCCAGGAATC-----          | mirL | 18 | 3      |

---

C:\Documents and Settings\hong\Desktop\Reprogramming-total RNA.txt

```
-----ACGGTCCAGTTTTCCCAG----- mirL 18 2
-----CGGTCCAGTTTTCCCAGG----- mirL 18 1
-----ACGGTCCAGTTTTCCCAGGAATCCCT----- mirL 26 1
-----ACGGTCCAGTTTTCCCAGG----- mirL 19 1
-----ACGGTCCAGTTTTCCCAGGAATCCCTTG----- mirL 28 1
-----CTTGGATGCTAAGATGGGG----- loop 19 163
-----CCTTGGATGCTAAGATGGG----- loop 19 14
-----CCTTGGATGCTAAGATGGGGA----- loop 21 13
-----CTTGGATGCTAAGATGGGGA----- loop 20 11
-----CTTGGATGCTAAGATGGG----- loop 18 5
-----TTGGATGCTAAGATGGGG----- loop 18 3
-----GGATTCCTGGAATACTGTTCT----- mirR 22 2835
-----ATTCCTGGAATACTGTTCTT----- mirR 21 775
-----GGATTCCTGGAATACTGTTTC----- mirR 21 775
-----ATTCCTGGAATACTGTTCTTG----- mirR 22 623
-----ATTCCTGGAATACTGTTCT----- mirR 20 505
-----GATTCCTGGAATACTGTTCT----- mirR 21 422
-----GATTCCTGGAATACTGTTCTT----- mirR 22 294
-----GGATTCCTGGAATACTGTTCTT----- mirR 23 198
-----GGATTCCTGGAATACTGTT----- mirR 20 122
-----GATTCCTGGAATACTGTTTC----- mirR 20 92
-----GATTCCTGGAATACTGTTCTTG----- mirR 23 91
-----ATTCCTGGAATACTGTTTC----- mirR 19 70
-----ATTCCTGGAATACTGTTCTTGA----- mirR 23 64
-----GGATTCCTGGAATACTGTTCTTG----- mirR 24 52
-----GATTCCTGGAATACTGTTCTTGA----- mirR 24 14
-----GGATTCCTGGAATACTGTT----- mirR 19 14
-----GATTCCTGGAATACTGTT----- mirR 19 14
-----ATTCCTGGAATACTGTT----- mirR 18 12
-----TTCCTGGAATACTGTTCTTG----- mirR 21 6
-----GATTCCTGGAATACTGTT----- mirR 18 5
-----GGATTCCTGGAATACTGTTCTTGA----- mirR 25 5
-----TTCCTGGAATACTGTTCTTGA----- mirR 22 5
-----ATTCCTGGAATACTGTTCTTGAG----- mirR 24 3
-----TTCCTGGAATACTGTTCT----- mirR 19 3
-----TGGGGATTCCTGGAATACTGTT----- mirR 22 2
-----TTCCTGGAATACTGTTCTT----- mirR 20 1
-----TTCCTGGAATACTGTTCTTGAG----- mirR 23 1
-----GGGATTCCTGGAATACTGTT----- mirR 21 1
-----TGAGGTCATGGCTTAGCAGCTGGATCTGTCTCCC morR 34 3
-----GAGGTCATGGCTTAGCAGCTGGATCTGTCTCCC morR 33 1
-----TGAGGTCATGGCTTAGCAGC----- morR 20 1
-----TGAGGTCATGGCTTAGCAGCT----- morR 21 1
```

>mmu-mir-19b-2

AACTACAGCGCAAGGACATTGCTACTTACGATTAGTTTTGCAGATTGTCAGTTCCAGCGTATATGTGAATATATGGCTGTGCAAATCCATGCAAACTGATTGTGGGAATGTGTACCTTTCT species len reads

|                                       |      |    |         |
|---------------------------------------|------|----|---------|
| -----GGACATTGCTACTTACGATT-----        | morL | 20 | 54      |
| -----AGGACATTGCTACTTACGATT-----       | morL | 21 | 27      |
| -----GACATTGCTACTTACGATT-----         | morL | 19 | 4       |
| -----AGGACATTGCTACTTACGATTA-----      | morL | 22 | 4       |
| AACTACAGCGCAAGGACATTGCTACTTACGATTAG   | morL | 35 | 3       |
| -----ATTGCTACTTACGATTAG-----          | morL | 18 | 2       |
| -----GGACATTGCTACTTACGATTA-----       | morL | 21 | 1       |
| -----GACATTGCTACTTACGATTA-----        | morL | 20 | 1       |
| -----AGTTTTGCAGATTTGCAGTTCAGC-----    | mirL | 24 | 498     |
| -----AGTTTTGCAGATTTGCAGTTCAG-----     | mirL | 23 | 402     |
| -----AGTTTTGCAGATTTGCAGTTCAGCG-----   | mirL | 25 | 78      |
| -----AGTTTTGCAGATTTGCAGTTCAG-----     | mirL | 22 | 55      |
| -----AGTTTTGCAGATTTGCAGTTCAG-----     | mirL | 20 | 34      |
| -----AGTTTTGCAGATTTGCAGTTCAG-----     | mirL | 21 | 27      |
| -----AGTTTTGCAGATTTGCAGTTCAGCGT-----  | mirL | 26 | 22      |
| -----GTTTTGCAGATTTGCAGTTCAG-----      | mirL | 18 | 2       |
| -----TTTGCAGATTTGCAGTTCAG-----        | mirL | 20 | 1       |
| -----GTATATGTGAATATATGGC-----         | loop | 19 | 1       |
| -----GTATATGTGAATATATGGCT-----        | loop | 20 | 1       |
| -----TGTGCAAATCCATGCAAAAAGTGA-----    | mirR | 23 | 1425527 |
| -----TGTGCAAATCCATGCAAAAAGTGA-----    | mirR | 22 | 205482  |
| -----GTGCAAATCCATGCAAAAAGTGA-----     | mirR | 22 | 31861   |
| -----TGTGCAAATCCATGCAAAAAGTGA-----    | mirR | 21 | 22727   |
| -----CTGTGCAAATCCATGCAAAAAGTGA-----   | mirR | 24 | 15342   |
| -----TGTGCAAATCCATGCAAAAAGTGA-----    | mirR | 24 | 6611    |
| -----GTGCAAATCCATGCAAAAAGTGA-----     | mirR | 21 | 5553    |
| -----TGTGCAAATCCATGCAAAAAGTGA-----    | mirR | 19 | 4749    |
| -----TGTGCAAATCCATGCAAAAAGTGA-----    | mirR | 20 | 4374    |
| -----CTGTGCAAATCCATGCAAAAAGTGA-----   | mirR | 23 | 3720    |
| -----TGTGCAAATCCATGCAAAAAGTGA-----    | mirR | 25 | 2633    |
| -----CTGTGCAAATCCATGCAAAAAGTGA-----   | mirR | 22 | 1089    |
| -----GTGCAAATCCATGCAAAAAGTGA-----     | mirR | 20 | 572     |
| -----GCAAATCCATGCAAAAAGTGA-----       | mirR | 20 | 276     |
| -----GTGCAAATCCATGCAAAAAGTGA-----     | mirR | 18 | 266     |
| -----GTGCAAATCCATGCAAAAAGTGA-----     | mirR | 19 | 243     |
| -----GTGCAAATCCATGCAAAAAGTGA-----     | mirR | 23 | 182     |
| -----GTGCAAATCCATGCAAAAAGTGA-----     | mirR | 24 | 137     |
| -----CTGTGCAAATCCATGCAAAAAGTGA-----   | mirR | 21 | 101     |
| -----CTGTGCAAATCCATGCAAAAAGTGA-----   | mirR | 20 | 87      |
| -----CTGTGCAAATCCATGCAAAAAGTGA-----   | mirR | 25 | 72      |
| -----GCTGTGCAAATCCATGCAAAAAGTGA-----  | mirR | 25 | 64      |
| -----CTGTGCAAATCCATGCAAAAAGTGA-----   | mirR | 26 | 42      |
| -----TGCAAATCCATGCAAAAAGTGA-----      | mirR | 21 | 42      |
| -----GGCTGTGCAAATCCATGCAAAAAGTGA----- | mirR | 26 | 34      |
| -----GCAAATCCATGCAAAAAGTGA-----       | mirR | 19 | 31      |
| -----GCTGTGCAAATCCATGCAAAAAGTGA-----  | mirR | 23 | 15      |

```

-----GCTGTGCAAATCCATGCAAAACTG----- mirR 24 12
-----TGCAAATCCATGCAAAACTG----- mirR 20 8
-----GGCTGTGCAAATCCATGCAAAACTG----- mirR 25 6
-----GCAAATCCATGCAAAACT----- mirR 18 2
-----TGCAAATCCATGCAAAACTGATT----- mirR 23 1
-----ATGTGGGAATGTGTACCTTT----- morR 21 3
-----TGGGAATGTGTACCTTTCT morR 19 1
-----TGTGGGAATGTGTACCTTTCT morR 22 1
-----GATTGTGGGAATGTGTAC----- morR 18 1

>mmu-mir-130a
GGGCCGGCATGCCTTTGCTGCTGGCCGGAGCTCTTTTCACATTGTGCTACTGTCTAACGTGTACCGAGCAGTGCAATGTTAAAAGGGCATCGGCCTTGTAGTACTACCCAGTGCCGGCAGCCTCC species len r
-----GCCTTTGCTGCTGGCCGGA----- morL 19 11
-----TGCCTTGCTGCTGGCCGGA----- morL 20 11
-----ATGCCTTTGCTGCTGGCCGGA----- morL 21 5
-----GCCTTTGCTGCTGGCCGGAG----- morL 20 4
-----GCCTTTGCTGCTGGCCGG----- morL 18 3
-----CCTTTGCTGCTGGCCGGA----- morL 18 3
-----ATGCCTTTGCTGCTGGCCGGAG----- morL 22 1
-----TGCCTTGCTGCTGGCCGGAG----- morL 21 1
GGGCCGGCATGCCTTTGCTGCTGGCCGGA----- morL 29 1
-----GGCATGCCTTTGCTGCTGGCCGGA----- morL 24 1
-----TGCCTTGCTGCTGGCCGG----- morL 19 1
-----CATGCCTTTGCTGCTGGCC----- morL 19 1
-----ATGCCTTTGCTGCTGGCCG----- morL 19 1
-----GCTCTTTTCACATTGTGCTACT----- mirL 22 22544
-----GCTCTTTTCACATTGTGCTACT----- mirL 21 1670
-----GCTCTTTTCACATTGTGCTACTG----- mirL 23 1319
-----AGCTCTTTTCACATTGTGCTACT----- mirL 23 219
-----GCTCTTTTCACATTGTGCTA----- mirL 20 134
-----AGCTCTTTTCACATTGTGCTACT----- mirL 22 125
-----GCTCTTTTCACATTGTGCTACTGT----- mirL 24 49
-----AGCTCTTTTCACATTGTGCTA----- mirL 21 31
-----CTCTTTTCACATTGTGCTACT----- mirL 21 27
-----GCTCTTTTCACATTGTGCT----- mirL 19 27
-----AGCTCTTTTCACATTGTGCT----- mirL 19 26
-----GCTCTTTTCACATTGTGCT----- mirL 18 23
-----AGCTCTTTTCACATTGTGCTACTG----- mirL 24 20
-----AGCTCTTTTCACATTGTGCT----- mirL 20 11
-----TCTTTTCACATTGTGCTACTGT----- mirL 22 8
-----TCTTTTCACATTGTGCTACT----- mirL 20 5
-----AGCTCTTTTCACATTGTG----- mirL 18 3
-----CTTTTCACATTGTGCTACT----- mirL 19 3
-----GGAGCTCTTTTCACATTGTGCTACT----- mirL 24 2
-----TCTTTTCACATTGTGCTACTG----- mirL 21 2
-----CTTTTCACATTGTGCTACTG----- mirL 20 1

```

|                                                |      |    |         |
|------------------------------------------------|------|----|---------|
| -----GGAGCTCTTTTCACATTGTGCTA-----              | mirL | 23 | 1       |
| -----CTCTTTTCACATTGTGCTACTG-----               | mirL | 22 | 1       |
| -----GTCTAACGTGTACCGAGC-----                   | loop | 18 | 27      |
| -----GTCTAACGTGTACCGAGCA-----                  | loop | 19 | 5       |
| -----TGTCTAACGTGTACCGAGCA-----                 | loop | 20 | 3       |
| -----TGTCTAACGTGTACCGAG-----                   | loop | 18 | 2       |
| -----TGTCTAACGTGTACCGAGC-----                  | loop | 19 | 2       |
| -----ACTGTCTAACGTGTACCGAGCAG-----              | loop | 23 | 1       |
| -----ACTGTCTAACGTGTACCGAG-----                 | loop | 20 | 1       |
| -----CAGTGCAATGTTAAAAGGGCAT-----               | mirR | 22 | 1119964 |
| -----CAGTGCAATGTTAAAAGGGCATC-----              | mirR | 23 | 173171  |
| -----CAGTGCAATGTTAAAAGGGCA-----                | mirR | 21 | 79514   |
| -----CAGTGCAATGTTAAAAGGGCATCG-----             | mirR | 24 | 16442   |
| -----CAGTGCAATGTTAAAAGGGC-----                 | mirR | 20 | 14993   |
| -----GCAGTGCAATGTTAAAAGGGCAT-----              | mirR | 23 | 6010    |
| -----AGTGCAATGTTAAAAGGGCATC-----               | mirR | 22 | 4221    |
| -----CAGTGCAATGTTAAAAGGG-----                  | mirR | 19 | 2905    |
| -----CAGTGCAATGTTAAAAGGGCATCGG-----            | mirR | 25 | 2420    |
| -----AGTGCAATGTTAAAAGGGCAT-----                | mirR | 21 | 2324    |
| -----AGTGCAATGTTAAAAGGGCA-----                 | mirR | 20 | 353     |
| -----GCAGTGCAATGTTAAAAGGGCATC-----             | mirR | 24 | 334     |
| -----AGTGCAATGTTAAAAGGGCATCG-----              | mirR | 23 | 265     |
| -----GTGCAATGTTAAAAGGGCAT-----                 | mirR | 20 | 217     |
| -----GCAGTGCAATGTTAAAAGGGCA-----               | mirR | 22 | 178     |
| -----GCAGTGCAATGTTAAAAGGGC-----                | mirR | 21 | 158     |
| -----GCAGTGCAATGTTAAAAGGGCATCG-----            | mirR | 25 | 123     |
| -----AGTGCAATGTTAAAAGGGC-----                  | mirR | 19 | 79      |
| -----GTGCAATGTTAAAAGGGCATC-----                | mirR | 21 | 65      |
| -----AGTGCAATGTTAAAAGGGCATCGG-----             | mirR | 24 | 48      |
| -----AGCAGTGCAATGTTAAAAGGGCAT-----             | mirR | 24 | 29      |
| -----TGCAATGTTAAAAGGGCAT-----                  | mirR | 19 | 22      |
| -----AGTGCAATGTTAAAAGGG-----                   | mirR | 18 | 14      |
| -----GCAGTGCAATGTTAAAAGGG-----                 | mirR | 20 | 12      |
| -----GCAGTGCAATGTTAAAAGGGCATCGG-----           | mirR | 26 | 11      |
| -----GTGCAATGTTAAAAGGGCA-----                  | mirR | 19 | 9       |
| -----GTGCAATGTTAAAAGGGCATCG-----               | mirR | 22 | 9       |
| -----TGCAATGTTAAAAGGGCATCG-----                | mirR | 21 | 9       |
| -----TGCAATGTTAAAAGGGCATC-----                 | mirR | 20 | 8       |
| -----TGCAATGTTAAAAGGGCA-----                   | mirR | 18 | 4       |
| -----TGCAATGTTAAAAGGGCATCGG-----               | mirR | 22 | 3       |
| -----AGCAGTGCAATGTTAAAAGGGCA-----              | mirR | 23 | 2       |
| -----TGCAATGTTAAAAGGGCATCGG-----               | mirR | 23 | 1       |
| -----AGCAGTGCAATGTTAAAAGGGC-----               | mirR | 22 | 1       |
| -----AGCAGTGCAATGTTAAAAGGGCATC-----            | mirR | 25 | 1       |
| -----CGGCCTTGTAAGTACTACCCAGTGCCGGCAGCCTCC----- | morR | 35 | 21      |
| -----CGGCCTTGTAAGTACTACCCAGT-----              | morR | 22 | 12      |

```

-----CGGCCTTGTAGTACTACCCAGTG----- morR 23 8
-----CGGCCTTGTAGTACTACCCAG----- morR 21 7
-----CGGCCTTGTAGTACTACCC----- morR 19 2
-----CGGCCTTGTAGTACTACCCAGTGC----- morR 24 1
-----GCCTTGTAGTACTACCCAG----- morR 19 1
-----CATCGGCCTTGTAGTACTA----- morR 19 1
-----GGCCTTGTAGTACTACCC----- morR 18 1
-----CGGCCTTGTAGTACTACCCAGTGCCGCA----- morR 29 1
-----CCTTGTAGTACTACCCAGTGC----- morR 21 1

```

>mmu-mir-103-2

| Sequence                                                        | species | len | reads |
|-----------------------------------------------------------------|---------|-----|-------|
| CAGCAGAGCTGTCTTCGTGCTTTCAGCTTCTTACAGTGCTGCCTTGTAGCATTAGGAAAGAGG | morR    | 23  | 8     |
| -----GAGCTGTCTTCGTGCTTTC-----                                   | morL    | 19  | 251   |
| -----AGCTGTCTTCGTGCTTTC-----                                    | morL    | 18  | 148   |
| -----GAGCTGTCTTCGTGCTTTC-----                                   | morL    | 20  | 32    |
| -----AGAGCTGTCTTCGTGCTTTC-----                                  | morL    | 20  | 26    |
| -----CAGAGCTGTCTTCGTGCTTTC-----                                 | morL    | 21  | 24    |
| -----GAGCTGTCTTCGTGCTTTC-----                                   | morL    | 18  | 20    |
| -----AGCTGTCTTCGTGCTTTC-----                                    | morL    | 19  | 12    |
| -----GCAGAGCTGTCTTCGTGCTTTC-----                                | morL    | 22  | 5     |
| -----CAGAGCTGTCTTCGTGCTTTC-----                                 | morL    | 22  | 3     |
| -----GCAGAGCTGTCTTCGTGCTTTC-----                                | morL    | 21  | 3     |
| -----AGCAGAGCTGTCTTCGTGCTTTC-----                               | morL    | 23  | 2     |
| -----GCTGTCTTCGTGCTTTC-----                                     | morL    | 18  | 2     |
| -----AGCTGTCTTCGTGCTTTCAGC-----                                 | morL    | 21  | 2     |
| CAGCAGAGCTGTCTTCGTGCTTTC                                        | morL    | 24  | 2     |
| -----AGAGCTGTCTTCGTGCTTTC-----                                  | morL    | 19  | 1     |
| -----AGAGCTGTCTTCGTGCTTTC-----                                  | morL    | 18  | 1     |
| -----GAGCTGTCTTCGTGCTTTCAG-----                                 | morL    | 21  | 1     |
| -----AGCTGTCTTCGTGCTTTCAG-----                                  | morL    | 20  | 1     |
| -----CAGAGCTGTCTTCGTGCTTTC-----                                 | morL    | 19  | 1     |
| -----CAGAGCTGTCTTCGTGCTTTC-----                                 | morL    | 18  | 1     |
| -----AGCTTCTTTACAGTGCTGCCTTGT-----                              | mirL    | 24  | 687   |
| -----AGCTTCTTTACAGTGCTGCCTTG-----                               | mirL    | 23  | 472   |
| -----AGCTTCTTTACAGTGCTGCCT-----                                 | mirL    | 21  | 207   |
| -----AGCTTCTTTACAGTGCTGCCTTGTA-----                             | mirL    | 25  | 91    |
| -----AGCTTCTTTACAGTGCTGCCTT-----                                | mirL    | 22  | 60    |
| -----AGCTTCTTTACAGTGCTGCC-----                                  | mirL    | 20  | 53    |
| -----AGCTTCTTTACAGTGCTGCCTTGTAG-----                            | mirL    | 26  | 39    |
| -----GCTTCTTTACAGTGCTGCCT-----                                  | mirL    | 20  | 7     |
| -----TTCTTTACAGTGCTGCCTT-----                                   | mirL    | 19  | 4     |
| -----GCTTCTTTACAGTGCTGCCTTG-----                                | mirL    | 22  | 3     |
| -----CAGCTTCTTTACAGTGCT-----                                    | mirL    | 18  | 3     |
| -----CAGCTTCTTTACAGTGCTGCCT-----                                | mirL    | 22  | 2     |
| -----CAGCTTCTTTACAGTGCTGCC-----                                 | mirL    | 21  | 1     |
| -----TCAGCTTCTTTACAGTGCTGCCT-----                               | mirL    | 23  | 1     |

```

-----TGTAGCATTTCAGGTCAAG----- loop 18 5
-----GTAGCATTTCAGGTCAAGC----- loop 18 2
-----AGCAGCATTGTACAGGGCTATGA----- mirR 23 1251890
-----AGCAGCATTGTACAGGGCTATG----- mirR 22 69478
-----AGCAGCATTGTACAGGGCTATGAA----- mirR 24 37982
-----CAGCATTGTACAGGGCTATGA----- mirR 21 29221
-----AGCAGCATTGTACAGGGCTATGAAA----- mirR 25 10122
-----CAGCATTGTACAGGGCTATGAA----- mirR 22 1108
-----AGCAGCATTGTACAGGGCTATGAAAG----- mirR 26 1106
-----GCAGCATTGTACAGGGCTATGA----- mirR 22 838
-----CAGCATTGTACAGGGCTATG----- mirR 20 753
-----AGCATTGTACAGGGCTATGA----- mirR 20 556
-----CAGCATTGTACAGGGCTATGAAA----- mirR 23 223
-----AGCAGCATTGTACAGGGCTATGAAAGA----- mirR 27 135
-----AAGCAGCATTGTACAGGGCTATGA----- mirR 24 85
-----GCAGCATTGTACAGGGCTATGAA----- mirR 23 70
-----GCAGCATTGTACAGGGCTATG----- mirR 21 66
-----AGCAGCATTGTACAGGGCTATGAAAGAA----- mirR 28 66
-----AGCATTGTACAGGGCTATGAA----- mirR 21 48
-----AGCATTGTACAGGGCTATG----- mirR 19 35
-----CAGCATTGTACAGGGCTATGAAAG----- mirR 24 21
-----AAGCAGCATTGTACAGGGCTATG----- mirR 23 15
-----GCAGCATTGTACAGGGCTATGAAA----- mirR 24 14
-----TCAAGCAGCATTGTACAGGGCTATGA----- mirR 26 10
-----AGCATTGTACAGGGCTATGAAA----- mirR 22 8
-----CAAGCAGCATTGTACAGGGCTATGA----- mirR 25 6
-----AAGCAGCATTGTACAGGGCTATGAA----- mirR 25 6
-----TCAAGCAGCATTGTACAGGGCTATG----- mirR 25 2
-----CAGCATTGTACAGGGCTATGAAAGA----- mirR 25 2
-----AAGCAGCATTGTACAGGGCTATGAAA----- mirR 26 1
-----CAAGCAGCATTGTACAGGGCTATG----- mirR 24 1
-----AGCATTGTACAGGGCTATGAAAG----- mirR 23 1
-----AAGAACCAAGAATGGGCTGCC----- morR 21 18
-----AAGAACCAAGAATGGGCTGC----- morR 20 5
-----GAAAGAACCAAGAATGGG----- morR 18 4
-----AAGAACCAAGAATGGGCTGCC----- morR 22 3
-----AAGAACCAAGAATGGGCT----- morR 18 3
-----AAGAACCAAGAATGGGCTGCCCTTAGGGAAAGAG----- morR 34 2
-----AAGAACCAAGAATGGGCTGCCCTTAGGGAAAGAGG----- morR 35 2
-----AAGAACCAAGAATGGGCTGCCCTTAGGGA----- morR 29 1
-----TGAAAGAACCAAGAATGGG----- morR 19 1

>mmu-mir-103-1
GATGCTTGGAAGTTTCTTACTGCCCTCGGCTTCTTTACAGTGCTGCCTTGTTGCATATGGATCAAGCAGCATTGTACAGGGCTATGAAGGCATTGAGACTTGTCTTCATGCGGTTTGAGTG species len rea
-----AAGTTTCTTACTGCCCTC----- morL 19 23
-----GAAGTTTCTTACTGCCCTC----- morL 20 18

```

|                                  |                 |
|----------------------------------|-----------------|
| ---CTTGGAAAGTTTCTTACTGCC---      | morL 21 15      |
| ---AGTTTCTTACTGCCCTC---          | morL 18 10      |
| ---TTTCTTACTGCCCTCGGC---         | morL 18 8       |
| ---AGTTTCTTACTGCCCTCGGC---       | morL 21 4       |
| ---AGTTTCTTACTGCCCTCG---         | morL 19 3       |
| ---AAGTTTCTTACTGCCCTCG---        | morL 20 3       |
| ---GTTTCTTACTGCCCTCG---          | morL 18 2       |
| ---GAAGTTTCTTACTGCCCTCG---       | morL 21 2       |
| ---TTTTCTTACTGCCCTCGGC---        | morL 19 2       |
| ---GGAAGTTTCTTACTGCC---          | morL 18 2       |
| ---GTTTCTTACTGCCCTCGGC---        | morL 20 2       |
| ---GTTTCTTACTGCCCTCGG---         | morL 19 2       |
| ---TTTTCTTACTGCCCTCGG---         | morL 18 2       |
| ---TGGAAGTTTCTTACTGCCCTC---      | morL 22 1       |
| ---TGGAAGTTTCTTACTGCC---         | morL 20 1       |
| ---AGTTTCTTACTGCCCTCGG---        | morL 20 1       |
| ---AAGTTTCTTACTGCCCT---          | morL 18 1       |
| ---GGAAGTTTCTTACTGCCCTC---       | morL 21 1       |
| ---CTTGGAAAGTTTCTTACTGCCCTC---   | morL 24 1       |
| GATGCTTGGAAGTTTCTTACTGCCCTC---   | morL 28 1       |
| ---GGCTTCTTTACAGTGCTGCCTTGT---   | mirL 24 468     |
| ---GGCTTCTTTACAGTGCTGCCTTG---    | mirL 23 193     |
| ---GGCTTCTTTACAGTGCTGCCT---      | mirL 21 46      |
| ---GGCTTCTTTACAGTGCTGCC---       | mirL 20 45      |
| ---GGCTTCTTTACAGTGCTGCCTTGT---   | mirL 25 30      |
| ---GGCTTCTTTACAGTGCTGCCTT---     | mirL 22 26      |
| ---GGCTTCTTTACAGTGCTGCCTTGTG---  | mirL 26 18      |
| ---GCTTCTTTACAGTGCTGCCT---       | mirL 20 7       |
| ---TTCTTTACAGTGCTGCCTT---        | mirL 19 4       |
| ---GCTTCTTTACAGTGCTGCCTTG---     | mirL 22 3       |
| ---TGTTGCATATGGATCAAG---         | loop 18 1       |
| ---AGCAGCATTGTACAGGGCTATGA---    | mirR 23 1251890 |
| ---AGCAGCATTGTACAGGGCTATG---     | mirR 22 69478   |
| ---AGCAGCATTGTACAGGGCTATGAA---   | mirR 24 37981   |
| ---CAGCATTGTACAGGGCTATGA---      | mirR 21 29221   |
| ---AGCAGCATTGTACAGGGCTATGAAG---  | mirR 25 7057    |
| ---AGCAGCATTGTACAGGGCTATGAAGG--- | mirR 26 1174    |
| ---CAGCATTGTACAGGGCTATGAA---     | mirR 22 1108    |
| ---GCAGCATTGTACAGGGCTATGA---     | mirR 22 838     |
| ---CAGCATTGTACAGGGCTATG---       | mirR 20 753     |
| ---AGCATTGTACAGGGCTATGA---       | mirR 20 556     |
| ---AGCAGCATTGTACAGGGCTATGAAGG--- | mirR 27 235     |
| ---CAGCATTGTACAGGGCTATGAAG---    | mirR 23 96      |
| ---AAGCAGCATTGTACAGGGCTATGA---   | mirR 24 85      |
| ---GCAGCATTGTACAGGGCTATGAA---    | mirR 23 70      |
| ---GCAGCATTGTACAGGGCTATG---      | mirR 21 66      |



```

-----AGCATTGTACAGGGCTATGAA----- mirR 21 48
-----AGCAGCATTGTACAGGGCTATGAAGGCA----- mirR 28 41
-----AGCATTGTACAGGGCTATG----- mirR 19 35
-----CAGCATTGTACAGGGCTATGAAGG----- mirR 24 25
-----GCAGCATTGTACAGGGCTATGAAG----- mirR 24 15
-----AAGCAGCATTGTACAGGGCTATG----- mirR 23 15
-----TCAAGCAGCATTGTACAGGGCTATGA----- mirR 26 10
-----CAGCATTGTACAGGGCTATGAAGGC----- mirR 25 8
-----CAAGCAGCATTGTACAGGGCTATGA----- mirR 25 6
-----AAGCAGCATTGTACAGGGCTATGAA----- mirR 25 6
-----AGCATTGTACAGGGCTATGAAG----- mirR 22 3
-----TCAAGCAGCATTGTACAGGGCTATG----- mirR 25 2
-----CAAGCAGCATTGTACAGGGCTATG----- mirR 24 1
-----AGCATTGTACAGGGCTATGAAGG----- mirR 23 1
-----AGGCATTGAGACTTGTTCTTCATGCGGTTTGAGT----- morR 34 12
-----AGGCATTGAGACTTGTTCTTC----- morR 21 5
-----AGGCATTGAGACTTGTTCTTC----- morR 18 4
-----TGAAGGCATTGAGACTTG----- morR 18 1
-----AAGGCATTGAGACTTGTT----- morR 18 1
-----AGGCATTGAGACTTGTTCTTCATGCGGTTTGAGTG morR 35 1
-----GCATTGAGACTTGTTCTTC----- morR 18 1
-----AAGGCATTGAGACTTGTTCTTCATGCGGTTTGAGT----- morR 35 1
-----GGCATTGAGACTTGTTCTTC----- morR 20 1
-----AAGGCATTGAGACTTGTTCTTC----- morR 19 1
-----CATTGAGACTTGTTCTTC----- morR 18 1

>mmu-mir-34a
CTGGGCTGGCCAGCTGTGAGTAATTCCTTTGGCAGTGTCTTAGCTGGTTGTTGTGAGTATTAGCTAAGGAAGCAATCAGCAAGTATACTGCCCTAGAAGTGCTGCACATTGTTGGGCCGAGAAGGAAAAG species le
-----GCCAGCTGTGAGTAATTCCT----- morL 20 9
-----TGGCCAGCTGTGAGTAATTCCT----- morL 22 7
-----CTGGCCAGCTGTGAGTAATTCCT----- morL 22 2
-----CAGCTGTGAGTAATTCCT----- morL 18 2
-----CAGCTGTGAGTAATTCCTTT----- morL 19 2
-----CCAGCTGTGAGTAATTCCT----- morL 18 2
-----GCCAGCTGTGAGTAATTCCT----- morL 19 2
-----TGGCCAGCTGTGAGTAATTCCTTT----- morL 23 1
CTGGGCTGGCCAGCTGTGAGTAATTCCT----- morL 28 1
-----GCCAGCTGTGAGTAATTC----- morL 18 1
-----GGCCAGCTGTGAGTAATTCCT----- morL 21 1
-----AGCTGTGAGTAATTCCTTTGG----- morL 20 1
-----CTGGCCAGCTGTGAGTAATTCCT----- morL 23 1
-----TGGCAGTGTCTTAGCTGGTTGT----- mirL 22 860
-----TGGCAGTGTCTTAGCTGGTTGTT----- mirL 23 163
-----TGGCAGTGTCTTAGCTGGTTGTTG----- mirL 24 365
-----GGCAGTGTCTTAGCTGGTTGT----- mirL 21 304
-----TGGCAGTGTCTTAGCTGGTTG----- mirL 21 154

```

```

-----GGCAGTGTCTTAGCTGGTTGTT----- mirL 22 992
-----TGGCAGTGTCTTAGCTGGTTGTTGT----- mirL 25 781
-----TGGCAGTGTCTTAGCTGGTT----- mirL 20 687
-----TGGCAGTGTCTTAGCTGGTTGTTGTG----- mirL 26 170
-----TTGGCAGTGTCTTAGCTGGTTGT----- mirL 23 148
-----GGCAGTGTCTTAGCTGGTTGTTG----- mirL 23 892
-----GCAGTGTCTTAGCTGGTTGT----- mirL 20 851
-----TTTGGCAGTGTCTTAGCTGGTTG----- mirL 23 643
-----TTTGGCAGTGTCTTAGCTGGTTGT----- mirL 24 613
-----GGCAGTGTCTTAGCTGGTTG----- mirL 20 607
-----TTGGCAGTGTCTTAGCTGGTTG----- mirL 22 384
-----GGCAGTGTCTTAGCTGGTT----- mirL 19 341
-----TTTGGCAGTGTCTTAGCTGGTT----- mirL 22 217
-----TTGGCAGTGTCTTAGCTGGTTGTT----- mirL 24 203
-----GGCAGTGTCTTAGCTGGTTGTTGT----- mirL 24 171
-----CAGTGTCTTAGCTGGTTGT----- mirL 19 114
-----GGCAGTGTCTTAGCTGGT----- mirL 18 85
-----TTTGGCAGTGTCTTAGCTGGTTGTT----- mirL 25 65
-----TTGGCAGTGTCTTAGCTGGTTGTTG----- mirL 25 60
-----TTGGCAGTGTCTTAGCTGGTT----- mirL 21 40
-----GCAGTGTCTTAGCTGGTTGTT----- mirL 21 34
-----CTTTGGCAGTGTCTTAGCTGGTTGT----- mirL 25 23
-----TTGGCAGTGTCTTAGCTGGTTGTTGT----- mirL 26 21
-----TTGGCAGTGTCTTAGCTGGT----- mirL 20 21
-----TTTGGCAGTGTCTTAGCTGGT----- mirL 21 18
-----TTTGGCAGTGTCTTAGCTGGTTGTTG----- mirL 26 13
-----TTTGGCAGTGTCTTAGCTGGTTGTTGT----- mirL 27 10
-----GCAGTGTCTTAGCTGGTTG----- mirL 19 6
-----CTTTGGCAGTGTCTTAGCTGGTTGTT----- mirL 26 6
-----CAGTGTCTTAGCTGGTTG----- mirL 18 4
-----GCAGTGTCTTAGCTGGTTGTTG----- mirL 22 4
-----CAGTGTCTTAGCTGGTTGTT----- mirL 20 4
-----CTTTGGCAGTGTCTTAGCTGGTT----- mirL 23 2
-----GCAGTGTCTTAGCTGGTTGTTGT----- mirL 24 1
-----GTGAGTATTAGCTAAGGAAG----- loop 20 198
-----GTGAGTATTAGCTAAGGAAGC----- loop 21 372
-----TGTGAGTATTAGCTAAGGAAGC----- loop 22 322
-----TGTGAGTATTAGCTAAGGAAG----- loop 21 114
-----TGTGAGTATTAGCTAAGGAAGCA----- loop 23 32
-----GTGAGTATTAGCTAAGGA----- loop 18 29
-----GTGAGTATTAGCTAAGGAAGCA----- loop 22 24
-----TTGTGAGTATTAGCTAAGGAAGCA----- loop 24 22
-----GTGAGTATTAGCTAAGGAA----- loop 19 19
-----GAGTATTAGCTAAGGAAG----- loop 18 3
-----GTGAGTATTAGCTAAGGAAGCAAT----- loop 24 2
-----GTGAGTATTAGCTAAGGAAGCAA----- loop 23 2

```

```

-----TGTGAGTATTAGCTAAGGAAGCAA----- loop 24 2
-----TGTGAGTATTAGCTAAGGAAGCAAT----- loop 25 1
-----GAGTATTAGCTAAGGAAGC----- loop 19 1
-----AATCAGCAAGTATACTGCCCTA----- mirR 22 202
-----CAATCAGCAAGTATACTGCCCTA----- mirR 23 144
-----CAATCAGCAAGTATACTGCCCT----- mirR 22 473
-----CAATCAGCAAGTATACTGCCCTAG----- mirR 24 283
-----AATCAGCAAGTATACTGCCCTAG----- mirR 23 263
-----AATCAGCAAGTATACTGCCCT----- mirR 21 219
-----CAATCAGCAAGTATACTGCCCT----- mirR 21 367
-----ATCAGCAAGTATACTGCCCTA----- mirR 21 342
-----AATCAGCAAGTATACTGCCCTAGA----- mirR 24 259
-----ATCAGCAAGTATACTGCCCTAGA----- mirR 23 245
-----AATCAGCAAGTATACTGCCCT----- mirR 20 218
-----ATCAGCAAGTATACTGCCCTAG----- mirR 22 198
-----CAATCAGCAAGTATACTGCCCTAGA----- mirR 25 184
-----TCAGCAAGTATACTGCCCTAGA----- mirR 22 132
-----ATCAGCAAGTATACTGCCCT----- mirR 20 60
-----CAATCAGCAAGTATACTGCC----- mirR 20 48
-----AATCAGCAAGTATACTGCC----- mirR 19 34
-----TCAGCAAGTATACTGCCCTAG----- mirR 21 29
-----TCAGCAAGTATACTGCCCT----- mirR 19 27
-----TCAGCAAGTATACTGCCCTA----- mirR 20 24
-----GCAATCAGCAAGTATACTGCCCT----- mirR 23 18
-----AATCAGCAAGTATACTGC----- mirR 18 15
-----CAATCAGCAAGTATACTGC----- mirR 19 14
-----GCAATCAGCAAGTATACTGCCCTA----- mirR 24 13
-----CAGCAAGTATACTGCCCTA----- mirR 19 10
-----GCAATCAGCAAGTATACTGCCCTAG----- mirR 25 4
-----ATCAGCAAGTATACTGCCCTAGAA----- mirR 24 3
-----TCAGCAAGTATACTGCCCTAGAA----- mirR 23 3
-----ATCAGCAAGTATACTGCCCT----- mirR 19 3
-----AGCAATCAGCAAGTATACTGCCCT----- mirR 24 2
-----TCAGCAAGTATACTGCCCT----- mirR 18 2
-----CAGCAAGTATACTGCCCTAG----- mirR 20 2
-----CAGCAAGTATACTGCCCT----- mirR 18 1
-----AGCAATCAGCAAGTATAC----- mirR 18 1
-----ATCAGCAAGTATACTGCC----- mirR 18 1
-----AGCAATCAGCAAGTATACTGCCCTAG----- mirR 26 1
-----GCAATCAGCAAGTATACTGCCCTAGA----- mirR 26 1
-----CAGCAAGTATACTGCCCTAGA----- mirR 21 1
-----AAGTGCTGCACATTGTTG----- morR 18 4
-----GAAGTGCTGCACATTGTTGGG----- morR 21 4
-----CTAGAAGTGCTGCACATT----- morR 18 3
-----GAAGTGCTGCACATTGTTG----- morR 19 1
-----GAAGTGCTGCACATTGTTGGCCGAGAAGGAAAA----- morR 34 1

```

```

-----GAAGTGCTGCACATTGTTGGGCCGAGAAGG----- morR 30 1
-----AAGTGCTGCACATTGTTGG----- morR 19 1
-----TAGAAGTGCTGCACATTGT----- morR 19 1
-----TAGAAGTGCTGCACATTG----- morR 18 1
-----AGTGCTGCACATTGTTGGG----- morR 19 1
-----GAAGTGCTGCACATTGTTGGGCCGAGAAGGAAAAG morR 35 1
-----GAAGTGCTGCACATTGTTGGGCCGAGAAGGAA--- morR 32 1

```

>mmu-mir-182

```

TGGCTGCTGGAGGCCTCCCACCATTTTGGCAATGGTAGAACTCACACCGGTAAGGTAATGGGACCCGGTGGTTCTAGACTTGCCAACATAGGTGTAAGTGCTGAGCTGCTGAAGGTCTGCAC species len rea
-----CTGGAGGCCTCCCACCATT----- morL 19 6
-----GCTGGAGGCCTCCCACCA----- morL 18 4
-----TGGAGGCCTCCCACCATT----- morL 18 3
-----GGAGGCCTCCCACCATT----- morL 18 2
TGGCTGCTGGAGGCCTCCCACCA----- morL 23 1
-----GCTGGAGGCCTCCCACCATT----- morL 20 1
-----TTTGGCAATGGTAGAACTCACACCG----- mirL 25 639919
-----TTTGGCAATGGTAGAACTCACACC----- mirL 24 164205
-----TTTGGCAATGGTAGAACTCACACCG----- mirL 26 125793
-----TTTGGCAATGGTAGAACTCACAC----- mirL 23 63674
-----TTTGGCAATGGTAGAACTCACA----- mirL 22 35619
-----TTTGGCAATGGTAGAACTCACACCGGT----- mirL 27 15717
-----TTGGCAATGGTAGAACTCACACCG----- mirL 24 8306
-----TTTGGCAATGGTAGAACTCAC----- mirL 21 7072
-----TTGGCAATGGTAGAACTCACACC----- mirL 23 2383
-----TTGGCAATGGTAGAACTCACACCGG----- mirL 25 2132
-----TTGGCAATGGTAGAACTCACAC----- mirL 22 2026
-----TTGGCAATGGTAGAACTCACA----- mirL 21 676
-----TTGGCAATGGTAGAACTCACACCGGT----- mirL 26 360
-----TTGGCAATGGTAGAACTCAC----- mirL 20 301
-----TGGCAATGGTAGAACTCACACCG----- mirL 23 173
-----GGCAATGGTAGAACTCACACCG----- mirL 22 170
-----GGCAATGGTAGAACTCACA----- mirL 19 109
-----TGGCAATGGTAGAACTCACA----- mirL 20 78
-----GGCAATGGTAGAACTCACACC----- mirL 21 56
-----TGGCAATGGTAGAACTCACACCGG----- mirL 24 43
-----TTTTGGCAATGGTAGAACTCACACCG----- mirL 26 28
-----TTTTGGCAATGGTAGAACTCACACC----- mirL 25 24
-----TTTTGGCAATGGTAGAACTCACACCG----- mirL 27 21
-----GGCAATGGTAGAACTCACACCGG----- mirL 23 20
-----TGGCAATGGTAGAACTCACACC----- mirL 22 19
-----TTTTGGCAATGGTAGAACTCACA----- mirL 23 18
-----TGGCAATGGTAGAACTCACAC----- mirL 21 13
-----ATTTTTGGCAATGGTAGAACTCACACC----- mirL 27 12
-----GGCAATGGTAGAACTCACACCGGT----- mirL 24 11
-----TTTTGGCAATGGTAGAACTCACAC----- mirL 24 9

```

```

-----GGCAATGGTAGAACTCAC----- mirL 18 9
-----ATTTTGGCAATGGTAGAACTCACACCG----- mirL 28 8
-----GGCAATGGTAGAACTCACAC----- mirL 20 8
-----TGGCAATGGTAGAACTCAC----- mirL 19 7
-----TGGCAATGGTAGAACTCACACCGGT----- mirL 25 7
-----TTTTTGGCAATGGTAGAACTCACAC----- mirL 25 6
-----TTTTTGGCAATGGTAGAACTCACACC----- mirL 26 3
-----TTTTTGGCAATGGTAGAACTCACACCGG----- mirL 28 2
-----TTTTTGGCAATGGTAGAACTCACACCGGT----- mirL 28 2
-----TTTTTGGCAATGGTAGAA----- mirL 18 1
-----TTTTTGGCAATGGTAGAACTCACACCGG----- mirL 27 1
-----TTTTTGGCAATGGTAGAACTCACA----- mirL 24 1
-----TTTTTGGCAATGGTAGAACTCA----- mirL 21 1
-----GTAAGGTAATGGGACCCG----- loop 18 1574
-----GTAAGGTAATGGGACCCGG----- loop 19 642
-----GTAAGGTAATGGGACCCGGT----- loop 20 46
-----GGTAAGGTAATGGGACCCGG----- loop 20 13
-----AAGGTAATGGGACCCGGT----- loop 18 4
-----GTAAGGTAATGGGACCCGGT----- loop 21 2
-----AGGTAATGGGACCCGGT----- loop 18 1
-----GGTAAGGTAATGGGACCCG----- loop 19 1
-----TAAGGTAATGGGACCCGG----- loop 18 1
-----GGTAAGGTAATGGGACCCGGT----- loop 21 1
-----GTGGTTCTAGACTTGCCAAC----- mirR 22 1593
-----GTGGTTCTAGACTTGCCAAC----- mirR 21 845
-----TGGTTCTAGACTTGCCAAC----- mirR 21 519
-----TGTTCTAGACTTGCCAAC----- mirR 20 346
-----GGTGGTTCTAGACTTGCCAAC----- mirR 22 295
-----GTGGTTCTAGACTTGCCAAC----- mirR 23 246
-----TGGTTCTAGACTTGCCAAC----- mirR 22 79
-----GTGGTTCTAGACTTGCCAAC----- mirR 20 64
-----TGGTTCTAGACTTGCCAAC----- mirR 19 42
-----GGTGGTTCTAGACTTGCCAAC----- mirR 21 28
-----GGTTCTAGACTTGCCAAC----- mirR 19 20
-----GGTGGTTCTAGACTTGCCAAC----- mirR 23 19
-----GTGGTTCTAGACTTGCCAAC----- mirR 19 18
-----TGGTTCTAGACTTGCCAAC----- mirR 18 10
-----GGTGGTTCTAGACTTGCCAAC----- mirR 18 10
-----GGTGGTTCTAGACTTGCCAAC----- mirR 24 9
-----GGTGGTTCTAGACTTGCCAAC----- mirR 20 9
-----TGGTTCTAGACTTGCCAAC----- mirR 23 7
-----GTGGTTCTAGACTTGCCAAC----- mirR 18 6
-----GTGGTTCTAGACTTGCCAAC----- mirR 24 5
-----GGTGGTTCTAGACTTGCCAAC----- mirR 19 4
-----GGTTCTAGACTTGCCAAC----- mirR 21 3
-----GGTTCTAGACTTGCCAAC----- mirR 20 3

```

C:\Documents and Settings\hong\Desktop\Reprogramming-total RNA.txt

```
-----GGTTCTAGACTTGCCAAC----- mirR 18 2
-----CGGTGGTTCTAGACTTGCCAACT----- mirR 23 1
-----GTTCTAGACTTGCCAACT----- mirR 18 1
-----GGTTCTAGACTTGCCAACTATG----- mirR 22 1
-----TGTAAGTGCTGAGCTGCTGAAG----- morR 22 22
-----TGTAAGTGCTGAGCTGCT----- morR 18 5
-----TGGTGTAAGTGCTGAGCTGCTGAAGGCTGCAC morR 33 3
-----TGGTGTAAGTGCTGAGCTGCTGAAGGCTCTG--- morR 30 1
-----ATGGTGTAAGTGCTGAGC----- morR 18 1
-----TGGTGTAAGTGCTGAGCTGCTGAAGGTC----- morR 28 1
-----TATGGTGTAAGTGCTGAG----- morR 18 1
-----TGTAAGTGCTGAGCTGCTGAA----- morR 21 1
```

>mmu-mir-17

```
CTGAAGCTGTGACCAGTCAGAATAATGTCAAAGTGCTTACAGTGCAGGTAGTGATGTGTGCATCTACTGCAGTGAGGGCACTTGTAGCATTATGCTGACAGCTGCCTCGGTGGGAGCCAC species len reads
-----GTGACCAGTCAGAATAATGT----- morL 20 95
-----TGACCAGTCAGAATAATGT----- morL 19 12
-----TGTGACCAGTCAGAATAATGT----- morL 21 7
-----GTGACCAGTCAGAATAATGTC----- morL 21 3
-----GACCAGTCAGAATAATGT----- morL 18 3
-----CCAGTCAGAATAATGTCA----- morL 18 2
-----AGCTGTGACCAGTCAGAATAATGT----- morL 24 1
-----GTGACCAGTCAGAATAATG----- morL 19 1
CTGAAGCTGTGACCAGTCAGAATAATGT----- morL 28 1
-----AGCTGTGACCAGTCAGAATAATGTCA----- morL 26 1
-----CTGTGACCAGTCAGAATAATGTC----- morL 23 1
-----TGTGACCAGTCAGAATAATG----- morL 20 1
-----CAAAGTGCTTACAGTGCAGGTAG----- mirL 23 549135
-----CAAAGTGCTTACAGTGCAGGTAGT----- mirL 24 226315
-----CAAAGTGCTTACAGTGCAGGTA----- mirL 22 77643
-----CAAAGTGCTTACAGTGCAGGT----- mirL 21 74944
-----CAAAGTGCTTACAGTGCAGGTAGTG----- mirL 25 18937
-----TCAAAGTGCTTACAGTGCAGGT----- mirL 22 9503
-----TCAAAGTGCTTACAGTGCAGGTAG----- mirL 24 8881
-----TCAAAGTGCTTACAGTGCAGGTA----- mirL 23 8656
-----CAAAGTGCTTACAGTGCAGG----- mirL 20 6150
-----CAAAGTGCTTACAGTGCAG----- mirL 19 3803
-----TCAAAGTGCTTACAGTGCAGGTAGT----- mirL 25 2645
-----AAAGTGCTTACAGTGCAGGTAG----- mirL 22 972
-----TCAAAGTGCTTACAGTGCAGG----- mirL 21 791
-----AAAGTGCTTACAGTGCAGGTAGT----- mirL 23 394
-----TCAAAGTGCTTACAGTGCAG----- mirL 20 280
-----AAGTGCTTACAGTGCAGGTAG----- mirL 21 171
-----TCAAAGTGCTTACAGTGCAGGTAGTG----- mirL 26 133
-----AAAGTGCTTACAGTGCAGGTA----- mirL 21 123
-----AAAGTGCTTACAGTGCAGGT----- mirL 20 107
```

```

-----AGTGCTTACAGTGCAGGTAG----- mirL 20 80
-----GTCAAAGTGCTTACAGTGCAGGTAG----- mirL 25 61
-----AAGTGCTTACAGTGCAGGTAGT----- mirL 22 58
-----AGTGCTTACAGTGCAGGTAGT----- mirL 21 37
-----AAAGTGCTTACAGTGCAGGTAGT----- mirL 24 36
-----AAGTGCTTACAGTGCAGGTAG----- mirL 20 30
-----TGTCAAAGTGCTTACAGTGCAGGTAG----- mirL 26 23
-----GTCAAAGTGCTTACAGTGCAGGTAGT----- mirL 26 22
-----AAGTGCTTACAGTGCAGGTAG----- mirL 19 17
-----AGTGCTTACAGTGCAGGTAG----- mirL 19 15
-----GTCAAAGTGCTTACAGTGCAGGTAG----- mirL 23 13
-----AAAGTGCTTACAGTGCAGGTAG----- mirL 19 13
-----TGTCAAAGTGCTTACAGTGCAGGTAG----- mirL 25 9
-----AGTGCTTACAGTGCAGGTAG----- mirL 18 9
-----AAAGTGCTTACAGTGCAGGTAG----- mirL 18 6
-----TGTCAAAGTGCTTACAGTGCAGGTAGT----- mirL 27 6
-----GTCAAAGTGCTTACAGTGCAGGTAG----- mirL 24 4
-----AAGTGCTTACAGTGCAGGTAGT----- mirL 23 4
-----AAGTGCTTACAGTGCAGGTAG----- mirL 18 2
-----AGTGATGTGTGCATCTACT----- loop 19 4
-----AGTGATGTGTGCATCTACT----- loop 18 2
-----TAGTGATGTGTGCATCTACT----- loop 20 1
-----ACTGCAGTGAGGGCACTTGTAG----- mirR 22 38215
-----ACTGCAGTGAGGGCACTTGTAGC----- mirR 23 20443
-----ACTGCAGTGAGGGCACTTGT----- mirR 20 10277
-----ACTGCAGTGAGGGCACTTGTAG----- mirR 21 5069
-----ACTGCAGTGAGGGCACTTGTAGCA----- mirR 24 5025
-----CTGCAGTGAGGGCACTTGTAG----- mirR 21 1773
-----CTGCAGTGAGGGCACTTGTAGC----- mirR 22 1254
-----CTGCAGTGAGGGCACTTGTAGCA----- mirR 23 1233
-----ACTGCAGTGAGGGCACTTGT----- mirR 19 645
-----ACTGCAGTGAGGGCACTTGTAGCAT----- mirR 25 284
-----CTGCAGTGAGGGCACTTGTAG----- mirR 20 155
-----CTGCAGTGAGGGCACTTGT----- mirR 19 134
-----CTGCAGTGAGGGCACTTGTAGCAT----- mirR 24 94
-----GCAGTGAGGGCACTTGTAG----- mirR 19 30
-----TACTGCAGTGAGGGCACTTGT----- mirR 21 25
-----TGCAGTGAGGGCACTTGTAGC----- mirR 21 19
-----GCAGTGAGGGCACTTGTAGC----- mirR 20 18
-----TGCAGTGAGGGCACTTGT----- mirR 18 14
-----TACTGCAGTGAGGGCACTTGTAG----- mirR 23 11
-----TACTGCAGTGAGGGCACTTGTAGC----- mirR 24 10
-----CTGCAGTGAGGGCACTTGT----- mirR 18 9
-----TGCAGTGAGGGCACTTGTAG----- mirR 20 7
-----TGCAGTGAGGGCACTTGTAG----- mirR 19 6
-----TACTGCAGTGAGGGCACTTGTAG----- mirR 22 4

```

```

-----TCTACTGCAGTGAGGGCACTTGT----- mirR 23 4
-----GCAGTGAGGGCACTTGTAGCA----- mirR 21 2
-----TGCAGTGAGGGCACTTGTAGCAT----- mirR 23 1
-----TACTGCAGTGAGGGCACTTGTAGCA----- mirR 25 1
-----TACTGCAGTGAGGGCACT----- mirR 18 1
-----TACTGCAGTGAGGGCACTTG----- mirR 20 1
-----CTACTGCAGTGAGGGCAC----- mirR 18 1
-----TGCAGTGAGGGCACTTGTAGCA----- mirR 22 1
-----ATTATGCTGACAGCTGCCTCGGT----- morR 23 6
-----ATTATGCTGACAGCTGCCTCGGTGGGAGCCAC morR 32 3
-----TAGCATTATGCTGACAGC----- morR 18 3
-----ATTATGCTGACAGCTGCC----- morR 18 2
-----TTATGCTGACAGCTGCCT----- morR 18 2
-----ATTATGCTGACAGCTGCCTCGGTGGGA----- morR 27 1
-----TTATGCTGACAGCTGCCTC----- morR 19 1
-----ATTATGCTGACAGCTGCCTCG----- morR 21 1
-----ATTATGCTGACAGCTGCCTC----- morR 20 1
-----ATTATGCTGACAGCTGCCT----- morR 19 1

```

>mmu-mir-29b-1

| ACGACAAAGCTTCTTCAGGAAGCTGGTTTCATATGGTGGTTTAGATTAAATAGTGATTGTCTAGCACCATTTGAAATCAGTGTCTTGGTGGAGAACTACTTCGCTGCCGACCGC | species | len | reads |
|--------------------------------------------------------------------------------------------------------------------|---------|-----|-------|
| -CGACAAAGCTTCTTCAGGAA-----                                                                                         | morL    | 20  | 2     |
| ACGACAAAGCTTCTTCAGGAA-----                                                                                         | morL    | 21  | 2     |
| --GACAAAGCTTCTTCAGGA-----                                                                                          | morL    | 18  | 1     |
| ACGACAAAGCTTCTTCAGGA-----                                                                                          | morL    | 20  | 1     |
| ---ACAAAGCTTCTTCAGGAAG-----                                                                                        | morL    | 19  | 1     |
| --GACAAAGCTTCTTCAGGAA-----                                                                                         | morL    | 19  | 1     |
| -----GCTGGTTTCATATGGTGGTTTAGA-----                                                                                 | mirL    | 24  | 10135 |
| -----GCTGGTTTCATATGGTGGTTTAG-----                                                                                  | mirL    | 23  | 2400  |
| -----GCTGGTTTCATATGGTGGTTTA-----                                                                                   | mirL    | 22  | 1757  |
| -----GCTGGTTTCATATGGTGGTTT-----                                                                                    | mirL    | 21  | 636   |
| -----GCTGGTTTCATATGGTGGTTTAGAT-----                                                                                | mirL    | 25  | 394   |
| -----GCTGGTTTCATATGGTGGTTTAGATT-----                                                                               | mirL    | 26  | 284   |
| -----GCTGGTTTCATATGGTGGTTT-----                                                                                    | mirL    | 20  | 246   |
| -----CTGGTTTCATATGGTGGTTTAGA-----                                                                                  | mirL    | 23  | 78    |
| -----TGGTTTCATATGGTGGTTTAGA-----                                                                                   | mirL    | 22  | 35    |
| -----CTGGTTTCATATGGTGGTTTAG-----                                                                                   | mirL    | 22  | 30    |
| -----GGTTTCATATGGTGGTTT-----                                                                                       | mirL    | 18  | 18    |
| -----CTGGTTTCATATGGTGGTTTA-----                                                                                    | mirL    | 21  | 16    |
| -----CTGGTTTCATATGGTGGTTTAGAT-----                                                                                 | mirL    | 24  | 15    |
| -----GGTTTCATATGGTGGTTTA-----                                                                                      | mirL    | 19  | 9     |
| -----AGCTGGTTTCATATGGTGGTTTAGA-----                                                                                | mirL    | 25  | 9     |
| -----TGGTTTCATATGGTGGTTTAG-----                                                                                    | mirL    | 21  | 5     |
| -----CTGGTTTCATATGGTGGT-----                                                                                       | mirL    | 18  | 5     |
| -----GGTTTCATATGGTGGTTTAG-----                                                                                     | mirL    | 20  | 3     |
| -----TGGTTTCATATGGTGGTTTAGATT-----                                                                                 | mirL    | 24  | 2     |



```

-----CTGGTTTCATATGGTGGTTTAGATT----- mirL 25 2
-----AGCTGGTTTCATATGGTGGTTTAG----- mirL 24 1
-----CTGGTTTCATATGGTGGTTTAGATTTA----- mirL 27 1
-----TTTAAATAGTGATTGTCT----- loop 18 1
-----ATTTAAATAGTGATTGTC----- loop 18 1
-----TAGCACCATTGAAATCAGTGTT----- mirR 23 715763
-----TAGCACCATTGAAATCAGTGT----- mirR 22 57974
-----TAGCACCATTGAAATCAGTGTTTC----- mirR 24 34122
-----AGCACCATTGAAATCAGTGTT----- mirR 22 14125
-----TAGCACCATTGAAATCAGTG----- mirR 21 7835
-----TAGCACCATTGAAATCAGT----- mirR 20 5842
-----TAGCACCATTGAAATCAGTGTTCT----- mirR 25 5003
-----CTAGCACCATTGAAATCAGTGTT----- mirR 23 4371
-----AGCACCATTGAAATCAGTGTT----- mirR 21 3521
-----AGCACCATTGAAATCAGTGTTTC----- mirR 23 2378
-----TAGCACCATTGAAATCAGTGTTCTT----- mirR 26 1072
-----CTAGCACCATTGAAATCAGT----- mirR 21 771
-----CTAGCACCATTGAAATCAGTG----- mirR 22 617
-----AGCACCATTGAAATCAGTG----- mirR 20 442
-----GCACCATTGAAATCAGTGTT----- mirR 21 436
-----CTAGCACCATTGAAATCAGTGTT----- mirR 24 417
-----AGCACCATTGAAATCAGTGTTCT----- mirR 24 313
-----AGCACCATTGAAATCAGT----- mirR 19 120
-----AGCACCATTGAAATCAGTGTTCTT----- mirR 25 54
-----GCACCATTGAAATCAGTGTTTC----- mirR 22 44
-----CACCATTGAAATCAGTGTT----- mirR 20 29
-----TCTAGCACCATTGAAATCAGTGTT----- mirR 25 26
-----CTAGCACCATTGAAATCAGTGTTTC----- mirR 25 24
-----GCACCATTGAAATCAGTGT----- mirR 20 21
-----GCACCATTGAAATCAGT----- mirR 18 13
-----CTAGCACCATTGAAATCAG----- mirR 20 11
-----GCACCATTGAAATCAGTG----- mirR 19 5
-----CTAGCACCATTGAAATCA----- mirR 19 4
-----TCTAGCACCATTGAAATCAGTGTT----- mirR 24 3
-----CACCATTGAAATCAGTGTTTC----- mirR 21 2
-----CACCATTGAAATCAGTGTT----- mirR 19 2
-----GTCTAGCACCATTGAAATCAGTGTT----- mirR 26 2
-----TCTAGCACCATTGAAATCAGT----- mirR 22 1
-----GCACCATTGAAATCAGTGTTCT----- mirR 23 1
-----TCTAGCACCATTGAAATCAGTGTTTC----- mirR 26 1
-----CACCATTGAAATCAGTG----- mirR 18 1
-----CTTGGTGGAGAACTACTT----- morR 18 9
-----CTTGGTGGAGAACTACTTCGCTGCCGAC--- morR 28 5
-----TTCTTGGTGGAGAACTAC----- morR 18 4
-----CTTGGTGGAGAACTACTTCGCTGC----- morR 24 3
-----GTTCTTGGTGGAGAACTAC----- morR 19 1

```

```
-----CTTGGTGGAGAACTACTTCGCTGCCGACCGC morR 31 1
-----TTGGTGGAGAACTACTTC----- morR 18 1
-----CTTGGTGGAGAACTACTTCGCTGCCGA---- morR 27 1
-----TGGTGGAGAACTACTTCGC----- morR 19 1
```

>mmu-mir-29b-2

| Sequence                                                                                                | species | len | reads  |
|---------------------------------------------------------------------------------------------------------|---------|-----|--------|
| TGAGATCCTCTTCTCTGGAAGCTGGTTCACATGGTGGCTTAGATTTTCCATCTTTGTATCTAGCACCATTGAAATCAGTGTTTTAGGAGTAAGAATTGCAGCA | morL    | 18  | 1      |
| --AGATCCTCTTCTCTGGA--                                                                                   | morL    | 19  | 1      |
| TGAGATCCTCTTCTCTGG--                                                                                    | morL    | 18  | 1      |
| ----ATCCTCTTCTCTGGAAG--                                                                                 | morL    | 18  | 1      |
| -----CTCTTCTTCTGGAAGCTG--                                                                               | morL    | 18  | 1      |
| -----CCTCTTCTTCTGGAAGCT--                                                                               | morL    | 18  | 1      |
| -----CTGGTTTCACATGGTGGCTTAG--                                                                           | mirL    | 22  | 1128   |
| -----GCTGGTTTCACATGGTGGCTTAGA--                                                                         | mirL    | 24  | 601    |
| -----CTGGTTTCACATGGTGGCTTAGAT--                                                                         | mirL    | 24  | 544    |
| -----CTGGTTTCACATGGTGGCTTAGA--                                                                          | mirL    | 23  | 403    |
| -----GCTGGTTTCACATGGTGGCTTAG--                                                                          | mirL    | 23  | 270    |
| -----CTGGTTTCACATGGTGGCTTA--                                                                            | mirL    | 21  | 163    |
| -----CTGGTTTCACATGGTGGCTTAGATT--                                                                        | mirL    | 25  | 59     |
| -----TGGTTTCACATGGTGGCTTAGAT--                                                                          | mirL    | 23  | 56     |
| -----TGGTTTCACATGGTGGCTTAGA--                                                                           | mirL    | 22  | 42     |
| -----GCTGGTTTCACATGGTGGCTTAGAT--                                                                        | mirL    | 25  | 33     |
| -----GCTGGTTTCACATGGTGGCTTA--                                                                           | mirL    | 22  | 33     |
| -----CTGGTTTCACATGGTGGCTT--                                                                             | mirL    | 20  | 28     |
| -----TGGTTTCACATGGTGGCTTAGATT--                                                                         | mirL    | 24  | 22     |
| -----TGGTTTCACATGGTGGCTTAG--                                                                            | mirL    | 21  | 20     |
| -----GCTGGTTTCACATGGTGGC--                                                                              | mirL    | 19  | 15     |
| -----GGTTTCACATGGTGGCTTAG--                                                                             | mirL    | 20  | 13     |
| -----CTGGTTTCACATGGTGGCTTAGATTT--                                                                       | mirL    | 26  | 13     |
| -----GCTGGTTTCACATGGTGGCT--                                                                             | mirL    | 20  | 12     |
| -----GCTGGTTTCACATGGTGGCTT--                                                                            | mirL    | 21  | 8      |
| -----GTTTCACATGGTGGCTTAG--                                                                              | mirL    | 19  | 6      |
| -----GGTTTCACATGGTGGCTTAGAT--                                                                           | mirL    | 22  | 3      |
| -----AGCTGGTTTCACATGGTGGCTTAGA--                                                                        | mirL    | 25  | 3      |
| -----AAGCTGGTTTCACATGGT--                                                                               | mirL    | 18  | 2      |
| -----GGTTTCACATGGTGGCTTA--                                                                              | mirL    | 19  | 2      |
| -----TGGTTTCACATGGTGGCTTA--                                                                             | mirL    | 20  | 2      |
| -----GTTTCACATGGTGGCTTAGAT--                                                                            | mirL    | 21  | 1      |
| -----GGTTTCACATGGTGGCTT--                                                                               | mirL    | 18  | 1      |
| -----TGGTTTCACATGGTGGCTTAGATTT--                                                                        | mirL    | 25  | 1      |
| -----TGGTTTCACATGGTGGCT--                                                                               | mirL    | 18  | 1      |
| -----ATTTTCCATCTTTGTAT--                                                                                | loop    | 18  | 8      |
| -----GATTTTCCATCTTTGTAT--                                                                               | loop    | 19  | 1      |
| -----TAGCACCATTGAAATCAGTGT--                                                                            | mirR    | 23  | 715763 |
| -----TAGCACCATTGAAATCAGTGT--                                                                            | mirR    | 22  | 57974  |
| -----TAGCACCATTGAAATCAGTGT--                                                                            | mirR    | 24  | 16968  |

```

-----AGCACCATTTGAAATCAGTGTT----- mirR 22 14125
-----TAGCACCATTTGAAATCAGTG----- mirR 21 7835
-----TAGCACCATTTGAAATCAGT----- mirR 20 5842
-----TAGCACCATTTGAAATCAGTGTTT----- mirR 25 4830
-----CTAGCACCATTTGAAATCAGTG----- mirR 23 4371
-----AGCACCATTTGAAATCAGTG----- mirR 21 3521
-----AGCACCATTTGAAATCAGTGTT----- mirR 23 1161
-----TAGCACCATTTGAAATCAG----- mirR 19 930
-----CTAGCACCATTTGAAATCAGT----- mirR 21 771
-----CTAGCACCATTTGAAATCAGTG----- mirR 22 617
-----AGCACCATTTGAAATCAGTG----- mirR 20 442
-----GCACCATTTGAAATCAGTGTT----- mirR 21 436
-----CTAGCACCATTTGAAATCAGTGTT----- mirR 24 417
-----AGCACCATTTGAAATCAGTGTTT----- mirR 24 317
-----AGCACCATTTGAAATCAGT----- mirR 19 120
-----AGCACCATTTGAAATCAG----- mirR 18 48
-----CACCATTTGAAATCAGTGTT----- mirR 20 29
-----TCTAGCACCATTTGAAATCAGTGTT----- mirR 25 26
-----GCACCATTTGAAATCAGTG----- mirR 20 21
-----GCACCATTTGAAATCAGT----- mirR 18 13
-----CTAGCACCATTTGAAATCAG----- mirR 20 11
-----GCACCATTTGAAATCAGTGTTT----- mirR 22 11
-----CTAGCACCATTTGAAATCAGTGTT----- mirR 25 10
-----GCACCATTTGAAATCAGTG----- mirR 19 5
-----CTAGCACCATTTGAAATCA----- mirR 19 4
-----TCTAGCACCATTTGAAATCAGTG----- mirR 24 3
-----CACCATTTGAAATCAGTGTTT----- mirR 21 2
-----TCTAGCACCATTTGAAATCAGTGTT----- mirR 26 2
-----CACCATTTGAAATCAGTG----- mirR 19 2
-----TCTAGCACCATTTGAAATCAGT----- mirR 22 1
-----GCACCATTTGAAATCAGTGTTT----- mirR 23 1
-----CACCATTTGAAATCAGTG----- mirR 18 1
-----GGAGTAAGAATTGCAGCA morR 18 3
-----AGGAGTAAGAATTGCAGC- morR 18 1
-----TTTTAGGAGTAAGAATTG----- morR 18 1
-----TTTAGGAGTAAGAATTGCA--- morR 19 1

```

>mmu-mir-191

```

CCTCCAATGGCTGGACAGCGGGCAACGGAATCCCAAAAGCAGCTGTTGTCTCCAGAGCATTCCAGCTGCACCTGGATTTCGTTCCCTGCTCTCCTGCCTGAGCAGCGCCCTGGCCCAG species len reads
---CCAATGGCTGGACAGCGGG----- morL 19 54
-CTCCAATGGCTGGACAGCGGG----- morL 21 16
--TCCAATGGCTGGACAGCGGG----- morL 20 13
CCTCCAATGGCTGGACAGCGGG----- morL 22 11
---CAATGGCTGGACAGCGGG----- morL 18 5
---CCAATGGCTGGACAGCGGGC----- morL 20 3
--TCCAATGGCTGGACAGCGGG----- morL 21 2

```

```

---CCAATGGCTGGACAGCGGGCAA----- morL 22 1
---CCAATGGCTGGACAGCGGGCA----- morL 21 1
-----CAACGGAATCCCAAAGCAGCT----- mirL 22 371914
-----CAACGGAATCCCAAAGCAGCTG----- mirL 23 187776
-----CAACGGAATCCCAAAGCAGCTGT----- mirL 24 153362
-----CAACGGAATCCCAAAGCAGC----- mirL 21 46223
-----CAACGGAATCCCAAAGCAGCTGTT----- mirL 25 29825
-----CAACGGAATCCCAAAGCAGCTGTTG----- mirL 26 19505
-----CAACGGAATCCCAAAGCAG----- mirL 20 9727
-----AACGGAATCCCAAAGCAGCTG----- mirL 22 3024
-----AACGGAATCCCAAAGCAGCT----- mirL 21 2626
-----AACGGAATCCCAAAGCAGCTGT----- mirL 23 2322
-----AACGGAATCCCAAAGCAGCTGTT----- mirL 24 525
-----AACGGAATCCCAAAGCAGC----- mirL 20 375
-----AACGGAATCCCAAAGCAGCTGTTG----- mirL 25 294
-----GCAACGGAATCCCAAAGCAGCT----- mirL 23 99
-----ACGGAATCCCAAAGCAGCT----- mirL 20 85
-----AACGGAATCCCAAAGCAG----- mirL 19 62
-----CGGAATCCCAAAGCAGCT----- mirL 19 46
-----ACGGAATCCCAAAGCAGCTGT----- mirL 22 40
-----GCAACGGAATCCCAAAGCAGCTG----- mirL 24 38
-----ACGGAATCCCAAAGCAGCTG----- mirL 21 33
-----GGCAACGGAATCCCAAAGCAGCT----- mirL 24 19
-----GCAACGGAATCCCAAAGCAGC----- mirL 22 18
-----ACGGAATCCCAAAGCAGCTGTTG----- mirL 24 18
-----GCAACGGAATCCCAAAGCAGCTGT----- mirL 25 18
-----ACGGAATCCCAAAGCAGC----- mirL 19 10
-----CGGAATCCCAAAGCAGCTG----- mirL 20 9
-----GGCAACGGAATCCCAAAGCAGCTG----- mirL 25 8
-----GCAACGGAATCCCAAAGCAGCTGTT----- mirL 26 7
-----ACGGAATCCCAAAGCAGCTGTT----- mirL 23 6
-----GCAACGGAATCCCAAAGCAGCTGTTG----- mirL 27 4
-----ACGGAATCCCAAAGCAG----- mirL 18 2
-----CGGAATCCCAAAGCAGCTGTT----- mirL 22 2
-----GGGCAACGGAATCCCAAAGCAGCTG----- mirL 26 1
-----GCAACGGAATCCCAAAGCAG----- mirL 21 1
-----GGCAACGGAATCCCAAAGCAGCTGTT----- mirL 27 1
-----CGGAATCCCAAAGCAGCTGTTG----- mirL 23 1
-----GGCAACGGAATCCCAAAGCAGCTGT----- mirL 26 1
-----TTGTCTCCAGAGCATTCCA----- loop 19 30
-----GTTGTCTCCAGAGCATTCCAG----- loop 21 2
-----TTGTCTCCAGAGCATTCCAGCT----- loop 22 2
-----TGTCTCCAGAGCATTCCAG----- loop 19 1
-----TTGTCTCCAGAGCATTCCAG----- loop 20 1
-----GTTGTCTCCAGAGCATTCCAGC----- loop 22 1
-----TGCTCCAGAGCATTCCA----- loop 18 1

```

```
-----GCTGCACTTGGATTTCGTTCCC----- mirR 22 3036
-----CTGCACTTGGATTTCGTTCCC----- mirR 21 948
-----GCTGCACTTGGATTTCGTTCC----- mirR 21 868
-----GCTGCACTTGGATTTCGTTCCCT----- mirR 23 152
-----CTGCACTTGGATTTCGTTCC----- mirR 20 139
-----GCTGCACTTGGATTTCGTTCC----- mirR 20 78
-----CTGCACTTGGATTTCGTTCCCT----- mirR 22 63
-----TGCACCTTGGATTTCGTTCCC----- mirR 20 36
-----GCTGCACTTGGATTTCGTT----- mirR 19 23
-----CTGCACTTGGATTTCGTTCC----- mirR 19 22
-----CTGCACTTGGATTTCGTTCCCTG----- mirR 23 21
-----TGCACCTTGGATTTCGTTCC----- mirR 19 21
-----GCTGCACTTGGATTTCGTT----- mirR 18 21
-----AGCTGCACTTGGATTTCGTTCC----- mirR 22 19
-----AGCTGCACTTGGATTTCGTTCCC----- mirR 23 17
-----TGCACCTTGGATTTCGTTCCCTGC----- mirR 23 16
-----TGCACCTTGGATTTCGTTCCCT----- mirR 21 14
-----GCTGCACTTGGATTTCGTTCCCTG----- mirR 24 13
-----CTGCACTTGGATTTCGTTCCCTGC----- mirR 24 6
-----AGCTGCACTTGGATTTCGTTCC----- mirR 21 5
-----CTGCACTTGGATTTCGTT----- mirR 18 5
-----CCAGCTGCACTTGGATTTCGTTCC----- mirR 24 3
-----GCACCTTGGATTTCGTTCCC----- mirR 19 3
-----AGCTGCACTTGGATTTCGTTCCCT----- mirR 24 3
-----TGCACCTTGGATTTCGTTCC----- mirR 18 1
-----AGCTGCACTTGGATTTCG----- mirR 18 1
-----TGCACCTTGGATTTCGTTCCCTGCT----- mirR 24 1
-----AGCTGCACTTGGATTTCGTT----- mirR 20 1
-----GCACCTTGGATTTCGTTCCCT----- mirR 20 1
-----TGCACCTTGGATTTCGTTCCCTGCTC----- mirR 25 1
-----TGCTCTCCTGCCTGAGCAGCGC----- morR 22 15
-----TGCTCTCCTGCCTGAGCAG----- morR 19 3
-----TGCTCTCCTGCCTGAGCAGCG----- morR 21 3
-----CCCTGCTCTCCTGCCTGA----- morR 18 1
-----TGCTCTCCTGCCTGAGCAGCGCCT----- morR 25 1
-----TGCTCTCCTGCCTGAGCAGCGCCCTGGCCCAG morR 32 1
-----TGCTCTCCTGCCTGAGCAGCGCCCTGGCCC-- morR 30 1
-----TGCTCTCCTGCCTGAGCAGCGCCCTGGC-- morR 28 1
```

>mmu-let-7f-2

```
GGGCTGAAGACAGACACTGGTGCTCTGTGGGATGAGGTAGTAGATTGTATAGTTTTAGGGTCATACCCCATCTGGAGATAACTATAACAGTCTACTGTCTTTCCACGGTGGTACACTTCCCATCCAACCTAGCCCTGT sp
-----ACACTGGTGCTCTGTGGGA----- mo
-----GACACTGGTGCTCTGTGGGA----- mo
-----CACTGGTGCTCTGTGGGA----- mo
-----GGCTGAAGACAGACACTGGTGCTCTGTGGGA----- mo
-----ACACTGGTGCTCTGTGGGAT----- mo
```

```
-----ACACTGGTGCTCTGTGGGATG----- mo
-----AGACACTGGTGCTCTGTGGGA----- mo
-----ACACTGGTGCTCTGTGGG----- mo
-----CAGACACTGGTGCTCTGTGGGA----- mo
-----GACACTGGTGCTCTGTGGGAT----- mo
-----GACAGACACTGGTGCTCTGTGGGA----- mo
-----AGACACTGGTGCTCTGTGG----- mo
-----GACACTGGTGCTCTGTGGGATG----- mo
GGGCTGAAGACAGACACTGGTGCTCTGTGG----- mo
-----CAGACACTGGTGCTCTGTGG----- mo
-----GACACTGGTGCTCTGTGG----- mo
-----ACACTGGTGCTCTGTGGGATGA----- mo
-----CACTGGTGCTCTGTGGGAT----- mo
-----AGACAGACACTGGTGCTCTGTG----- mo
-----CACTGGTGCTCTGTGGGATG----- mo
GGCTGAAGACAGACACTGGTGCTCTGTGGGAT----- mo
-----TGAGGTAGTAGATTGTATAGTT----- mi
-----TGAGGTAGTAGATTGTATAGTT----- mi
-----TGAGGTAGTAGATTGTATAGT----- mi
-----TGAGGTAGTAGATTGTATAGTTT----- mi
-----TGAGGTAGTAGATTGTATAG----- mi
-----GAGGTAGTAGATTGTATAGTT----- mi
-----TGAGGTAGTAGATTGTAT----- mi
-----TGAGGTAGTAGATTGTATA----- mi
-----GAGGTAGTAGATTGTATAGTT----- mi
-----GAGGTAGTAGATTGTATAGT----- mi
-----GAGGTAGTAGATTGTATAG----- mi
-----GAGGTAGTAGATTGTATAGTTT----- mi
-----ATGAGGTAGTAGATTGTATAGTT----- mi
-----GAGGTAGTAGATTGTATA----- mi
-----GGTAGTAGATTGTATAGTT----- mi
-----AGGTAGTAGATTGTATAGTT----- mi
-----AGGTAGTAGATTGTATAGT----- mi
-----GAGGTAGTAGATTGTATAGTTT----- mi
-----GGTAGTAGATTGTATAGT----- mi
-----ATGAGGTAGTAGATTGTATAGT----- mi
-----ATGAGGTAGTAGATTGTATAGTTT----- mi
-----AGGTAGTAGATTGTATAGTTT----- mi
-----GATGAGGTAGTAGATTGTATAGTT----- mi
-----AGGTAGTAGATTGTATAGTTT----- mi
-----AGGTAGTAGATTGTATAG----- mi
-----GATGAGGTAGTAGATTGTATAGTT----- mi
-----ATGAGGTAGTAGATTGTATAGTTT----- mi
-----AGGTAGTAGATTGTATAGTTT----- mi
-----ATGAGGTAGTAGATTGTATAG----- mi
```

```

-----GGATGAGGTAGTAGATTGTATA----- mi
-----GATGAGGTAGTAGATTGTATAG----- mi
-----TTAGGGTCATACCCCATCTTGGAGATAA----- lo
-----TTAGGGTCATACCCCATCTTGGAGAT----- lo
-----TTAGGGTCATACCCCATCTTGGAGA----- lo
-----TTAGGGTCATACCCCATCTTGGAGATAA----- lo
-----TTAGGGTCATACCCCATCTTGGAGATA----- lo
-----TAGGGTCATACCCCATCTTGGAGAT----- lo
-----CTATACAGTCTACTGTCTTTCC----- mi
-----CTATACAGTCTACTGTCTTTC----- mi
-----CTATACAGTCTACTGTCTTTCCC----- mi
-----TATACAGTCTACTGTCTTTC----- mi
-----CTATACAGTCTACTGTCTTT----- mi
-----AACTATACAGTCTACTGTCTTTC----- mi
-----CTATACAGTCTACTGTCT----- mi
-----CTATACAGTCTACTGTCTT----- mi
-----CTATACAGTCTACTGTCTTTCCCA----- mi
-----ATACAGTCTACTGTCTTTC----- mi
-----TAACTATACAGTCTACTG----- mi
-----TAACTATACAGTCTACTGTCTTTC----- mi
-----ACTATACAGTCTACTGTCTTTC----- mi
-----AACTATACAGTCTACTGTCTTTC----- mi
-----ACTATACAGTCTACTGTCTTTC----- mi
-----TACAGTCTACTGTCTTTC----- mi
-----TATACAGTCTACTGTCTT----- mi
-----CCACGGTGGTACACTTCCCATCCAAC TAGCCCTGT mo
-----CCACGGTGGTACACTTCCCATCCAAC TAGCC---- mo
-----CCACGGTGGTACACTTCCCATCCAAC TAGCCC---- mo
-----CCACGGTGGTACACTTCCC----- mo
-----CCACGGTGGTACACTTCCCATCCAAC T----- mo
-----CCACGGTGGTACACTTCCCATCCA----- mo
-----CCACGGTGGTACACTTCCCATCCAAC TAGC----- mo
-----CCCACGGTGGTACACTTCC----- mo
-----CACGGTGGTACACTTCCCAT----- mo
-----TCCCACGGTGGTACACTT----- mo

```

```

>mmu-let-7f-1
AAAAC TTGCTCTATCAGAGTGAGGTAGTAGATTGTATAGTTGTGGGGTAGTGATTTTACCCTGTTTAGGAGATAACTATACAATCTATTGCCCTCCCTGAGGAGTAGACTTGCTGCATTGT species len reads
---ACTTGCTCTATCAGAGTG----- morL 18 1
-AAAC TTGCTCTATCAGAG----- morL 18 1
AAAAC TTGCTCTATCAGA----- morL 18 1
-----TGAGGTAGTAGATTGTATAGTT----- mirL 22 570616
-----TGAGGTAGTAGATTGTATAGTTG----- mirL 23 82149
-----TGAGGTAGTAGATTGTATAGT----- mirL 21 64663
-----TGAGGTAGTAGATTGTATAG----- mirL 20 10745
-----TGAGGTAGTAGATTGTATAGTTGT----- mirL 24 9899

```

|                                      |      |    |       |
|--------------------------------------|------|----|-------|
| -----GAGGTAGTAGATTGTATAGTT-----      | mirL | 21 | 5676  |
| -----TGAGGTAGTAGATTGTAT-----         | mirL | 18 | 2299  |
| -----TGAGGTAGTAGATTGTATA-----        | mirL | 19 | 1940  |
| -----GAGGTAGTAGATTGTATAGTTG-----     | mirL | 22 | 1056  |
| -----GAGGTAGTAGATTGTATAGT-----       | mirL | 20 | 750   |
| -----GAGGTAGTAGATTGTATAG-----        | mirL | 19 | 333   |
| -----GAGGTAGTAGATTGTATAGTTGT-----    | mirL | 23 | 249   |
| -----AGGTAGTAGATTGTATAGTTGT-----     | mirL | 22 | 95    |
| -----GAGGTAGTAGATTGTATA-----         | mirL | 18 | 60    |
| -----GGTAGTAGATTGTATAGTT-----        | mirL | 19 | 59    |
| -----AGGTAGTAGATTGTATAGTT-----       | mirL | 20 | 57    |
| -----GTGAGGTAGTAGATTGTATAGTT-----    | mirL | 23 | 41    |
| -----AGGTAGTAGATTGTATAGT-----        | mirL | 19 | 39    |
| -----GGTAGTAGATTGTATAGTTG-----       | mirL | 20 | 32    |
| -----GGTAGTAGATTGTATAGT-----         | mirL | 18 | 29    |
| -----GAGGTAGTAGATTGTATAGTTGTG-----   | mirL | 24 | 20    |
| -----GTGAGGTAGTAGATTGTATAGTTG-----   | mirL | 24 | 13    |
| -----AGTGAGGTAGTAGATTGTATAGTT-----   | mirL | 24 | 13    |
| -----GTGAGGTAGTAGATTGTATAGT-----     | mirL | 22 | 12    |
| -----AGGTAGTAGATTGTATAGTTG-----      | mirL | 21 | 9     |
| -----AGGTAGTAGATTGTATAGTTGTG-----    | mirL | 23 | 8     |
| -----GAGTGAGGTAGTAGATTGTATAGTTG----- | mirL | 26 | 8     |
| -----GAGTGAGGTAGTAGATTGTATAGTT-----  | mirL | 25 | 6     |
| -----AGGTAGTAGATTGTATAG-----         | mirL | 18 | 6     |
| -----AGTGAGGTAGTAGATTGTATAGTTG-----  | mirL | 25 | 6     |
| -----GTGAGGTAGTAGATTGTATAG-----      | mirL | 21 | 3     |
| -----GAGTGAGGTAGTAGATTGTATA-----     | mirL | 22 | 1     |
| -----GGTAGTAGATTGTATAGTTGT-----      | mirL | 21 | 1     |
| -----AGTGAGGTAGTAGATTGTATAG-----     | mirL | 22 | 1     |
| -----GTGAGGTAGTAGATTGTATA-----       | mirL | 20 | 1     |
| -----GGTAGTAGATTGTATAGTTGTG-----     | mirL | 22 | 1     |
| -----CTATACAATCTATTGCCTTCCC-----     | mirR | 22 | 10271 |
| -----CTATACAATCTATTGCCTTCC-----      | mirR | 21 | 1448  |
| -----CTATACAATCTATTGCCTTC-----       | mirR | 20 | 594   |
| -----CTATACAATCTATTGCCTTCCCT-----    | mirR | 23 | 510   |
| -----AACTATACAATCTATTGCCTTC-----     | mirR | 22 | 353   |
| -----CTATACAATCTATTGCCTTCCCTG-----   | mirR | 24 | 344   |
| -----ACTATACAATCTATTGCCTTCC-----     | mirR | 22 | 267   |
| -----AACTATACAATCTATTGCCTTCC-----    | mirR | 23 | 119   |
| -----AACTATACAATCTATTGCCTT-----      | mirR | 21 | 50    |
| -----ACTATACAATCTATTGCCTTCCC-----    | mirR | 23 | 48    |
| -----CTATACAATCTATTGCCTTCCCTGA-----  | mirR | 25 | 38    |
| -----ATACAATCTATTGCCTTCCC-----       | mirR | 20 | 34    |
| -----ACTATACAATCTATTGCCTTC-----      | mirR | 21 | 34    |
| -----TATACAATCTATTGCCTTCCC-----      | mirR | 21 | 26    |
| -----CTATACAATCTATTGCCTT-----        | mirR | 19 | 26    |



```

-----TATACAATCTATTGCCTTCC----- mirR 20 12
-----TACAATCTATTGCCTTCCC----- mirR 19 7
-----AACTATACAATCTATTGCCTTCCCT----- mirR 25 7
-----TATACAATCTATTGCCTTCCCT----- mirR 22 4
-----TAACTATACAATCTATTGCCTTCC----- mirR 23 2
-----ACTATACAATCTATTGCCTTCCCTG----- mirR 25 2
-----TACAATCTATTGCCTTCCCTGA----- mirR 22 1
-----ACTATACAATCTATTGCC----- mirR 18 1
-----TATACAATCTATTGCCTTCCCTG----- mirR 23 1
-----ATACAATCTATTGCCTTCCCTGA----- mirR 23 1
-----TATACAATCTATTGCCTTCC----- mirR 19 1
-----ACTATACAATCTATTGCCTT----- mirR 20 1
-----GAGGAGTAGACTTGCTGCA----- morR 19 1
-----CCCTGAGGAGTAGACTTG----- morR 18 1
-----CTGAGGAGTAGACTTGCTGCAT----- morR 22 1
-----AGGAGTAGACTTGCTGCA----- morR 18 1
-----CTGAGGAGTAGACTTGCTGCATTGT morR 25 1

```

>mmu-mir-15b

| CTTTTGGAACCTTAAAGTACTGTAGCAGCACATCATGGTTTACATACTACAGTCAAGATGCGAATCATTATTGCTGCTCTAGAAATTTAAGGAAATTCATTCAAGATTATATGG | species | len | reads  |
|--------------------------------------------------------------------------------------------------------------------|---------|-----|--------|
| ---TGGAACCTTAAAGTACTG-----                                                                                         | morL    | 18  | 454    |
| ---TTGGAACCTTAAAGTACTG-----                                                                                        | morL    | 19  | 299    |
| ---TTTGG AACCTTAAAGTACTG-----                                                                                      | morL    | 20  | 82     |
| -TTTTGG AACCTTAAAGTACTG-----                                                                                       | morL    | 21  | 7      |
| CTTTTGG AACCTTAAAGTACTG-----                                                                                       | morL    | 22  | 3      |
| ----GGAACCTTAAAGTACTGT-----                                                                                        | morL    | 18  | 3      |
| ---TTGGAACCTTAAAGTACT-----                                                                                         | morL    | 18  | 3      |
| ----TGGAACCTTAAAGTACTGTA-----                                                                                      | morL    | 20  | 2      |
| ---TGGAACCTTAAAGTACTGT-----                                                                                        | morL    | 19  | 2      |
| ----GGAACCTTAAAGTACTGTAG-----                                                                                      | morL    | 20  | 1      |
| -----TAGCAGCACATCATGGTTTACA-----                                                                                   | mirL    | 22  | 502703 |
| -----TAGCAGCACATCATGGTTTAC-----                                                                                    | mirL    | 21  | 89022  |
| -----TAGCAGCACATCATGGTTTA-----                                                                                     | mirL    | 20  | 25279  |
| -----TAGCAGCACATCATGGTTTACAT-----                                                                                  | mirL    | 23  | 13524  |
| -----AGCAGCACATCATGGTTTACA-----                                                                                    | mirL    | 21  | 6886   |
| -----TAGCAGCACATCATGGTTT-----                                                                                      | mirL    | 19  | 4283   |
| -----AGCAGCACATCATGGTTTAC-----                                                                                     | mirL    | 20  | 3646   |
| -----TAGCAGCACATCATGGTT-----                                                                                       | mirL    | 18  | 2611   |
| -----TAGCAGCACATCATGGTTTACATA-----                                                                                 | mirL    | 24  | 2574   |
| -----AGCAGCACATCATGGTTTA-----                                                                                      | mirL    | 19  | 1481   |
| -----AGCAGCACATCATGGTTTACAT-----                                                                                   | mirL    | 22  | 603    |
| -----AGCAGCACATCATGGTTT-----                                                                                       | mirL    | 18  | 259    |
| -----GTAGCAGCACATCATGGTTTACA-----                                                                                  | mirL    | 23  | 170    |
| -----GCAGCACATCATGGTTTACA-----                                                                                     | mirL    | 20  | 152    |
| -----AGCAGCACATCATGGTTTACATA-----                                                                                  | mirL    | 23  | 150    |
| -----GTAGCAGCACATCATGGTTTAC-----                                                                                   | mirL    | 22  | 87     |

```

-----GCAGCACATCATGGTTTACATA----- mirL 22 84
-----AGCAGCACATCATGGTTTACATAC----- mirL 24 41
-----CAGCACATCATGGTTTACA----- mirL 19 32
-----GCAGCACATCATGGTTTACAT----- mirL 21 22
-----GCAGCACATCATGGTTTAC----- mirL 19 19
-----CTGTAGCAGCACATCATGGTTTACA----- mirL 25 18
-----TGTAGCAGCACATCATGGTTTAC----- mirL 23 17
-----CTGTAGCAGCACATCATGGTT----- mirL 21 11
-----GTAGCAGCACATCATGGTTTA----- mirL 21 11
-----TGTAGCAGCACATCATGGTTTACA----- mirL 24 7
-----GCAGCACATCATGGTTTA----- mirL 18 6
-----GTAGCAGCACATCATGGTTTACAT----- mirL 24 6
-----CAGCACATCATGGTTTAC----- mirL 18 5
-----CTGTAGCAGCACATCATGGTTT----- mirL 22 5
-----CAGCACATCATGGTTTACATA----- mirL 21 3
-----TGTAGCAGCACATCATGGTTTA----- mirL 22 3
-----CAGCACATCATGGTTTACAT----- mirL 20 2
-----GCAGCACATCATGGTTTACATAC----- mirL 23 2
-----CTGTAGCAGCACATCATGGTTTA----- mirL 23 1
-----TGTAGCAGCACATCATGGTTTACAT----- mirL 25 1
-----CTGTAGCAGCACATCATGGT----- mirL 20 1
-----GTAGCAGCACATCATGGT----- mirL 18 1
-----TACTACAGTCAAGATGCG----- loop 18 5
-----CGAATCATTATTGCTGCTCTA----- mirR 22 11054
-----CGAATCATTATTGCTGCTCT----- mirR 21 10600
-----CGAATCATTATTGCTGCTCTAG----- mirR 23 4713
-----CGAATCATTATTGCTGCTC----- mirR 20 1579
-----CGAATCATTATTGCTGCTCTAGA----- mirR 24 476
-----GCGAATCATTATTGCTGCTC----- mirR 21 329
-----CGAATCATTATTGCTGCT----- mirR 19 319
-----TGCGAATCATTATTGCTGCTC----- mirR 22 278
-----CGAATCATTATTGCTGCTCTAGAA----- mirR 25 63
-----TGCGAATCATTATTGCTGCT----- mirR 21 54
-----GCGAATCATTATTGCTGCTCT----- mirR 22 25
-----GCGAATCATTATTGCTGCT----- mirR 20 22
-----GAATCATTATTGCTGCTCTA----- mirR 21 13
-----GAATCATTATTGCTGCTCT----- mirR 20 10
-----GAATCATTATTGCTGCTCTAG----- mirR 22 9
-----GAATCATTATTGCTGCTC----- mirR 19 8
-----ATCATTATTGCTGCTCT----- mirR 18 6
-----AATCATTATTGCTGCTCTA----- mirR 20 3
-----GCGAATCATTATTGCTGCTCTAG----- mirR 24 3
-----TGCGAATCATTATTGCTGCTCT----- mirR 23 3
-----TGCGAATCATTATTGCTGCTC----- mirR 20 2
-----AATCATTATTGCTGCTCT----- mirR 19 2
-----AATCATTATTGCTGCTC----- mirR 18 2

```

```

-----ATGCGAATCATTATTTGC----- mirR 18 1
-----TGCGAATCATTATTTGCT----- mirR 18 1
-----GCGAATCATTATTTGCTG----- mirR 18 1
-----GCGAATCATTATTTGCTGCTCTA----- mirR 23 1
-----GAAATTTAAGGAAATTCATTCAAGATTATATGG morR 33 11
-----ATTTAAGGAAATTCATTC----- morR 18 4
-----GAAATTTAAGGAAATTCATTCAAG----- morR 24 1
-----CTAGAAATTTAAGGAAAT----- morR 18 1
-----GAAATTTAAGGAAATTCATTCAAGAT----- morR 26 1
-----AGAAATTTAAGGAAATTC----- morR 18 1
-----GAAATTTAAGGAAATTCATTCAAGATT----- morR 27 1
-----GAAATTTAAGGAAATTCAT----- morR 19 1

>mmu-mir-301a
CATTCCCTTCCTGCTCACTCCTGCTAACGGCTGCTCTGACTTTATTGCACTACTGTACTTTACAGCGAGCAGTGCAATAGTATTGTCAAAGCATCCGCGAGCAGGTTGCACACCTTCCTGGTTCTTGT species le
-----CTCACTCCTGCTAACGGCT----- morL 19 145
-----GCTCACTCCTGCTAACGGCT----- morL 20 95
-----CTCACTCCTGCTAACGGCTG----- morL 20 20
-----TCACTCCTGCTAACGGCT----- morL 18 19
-----TGCTCACTCCTGCTAACGGCT----- morL 21 16
-----GCTCACTCCTGCTAACGGCTG----- morL 21 12
CATTCCCTTCCTGCTCACTCCTGCTAACGGCT----- morL 32 9
-----TCACTCCTGCTAACGGCTG----- morL 19 8
-----CACTCCTGCTAACGGCTG----- morL 18 7
-----CTCACTCCTGCTAACGGC----- morL 18 4
-----TGCTCACTCCTGCTAACGGCTG----- morL 22 3
-----CTCACTCCTGCTAACGGCTGC----- morL 21 3
-----CTGCTCACTCCTGCTAACGGCT----- morL 22 2
-----TTCCTGCTCACTCCTGCTAACG----- morL 22 1
-----ACTCCTGCTAACGGCTGC----- morL 18 1
-----TCCTGCTCACTCCTGCTAACGGCTG----- morL 25 1
CATTCCCTTCCTGCTCACTCCTGCTAACGGCTGC----- morL 34 1
-----GCTCACTCCTGCTAACGGC----- morL 19 1
-----GCTCACTCCTGCTAACGGCTGC----- morL 22 1
-----TTTCTGCTCACTCCTGCTAACGGCT----- morL 26 1
-----GCTCACTCCTGCTAACGG----- morL 18 1
-----CTCCTGCTAACGGCTGCT----- morL 18 1
-----GCTCTGACTTTATTGCACTACT----- mirL 22 824
-----GCTCTGACTTTATTGCACTAC----- mirL 21 276
-----GCTCTGACTTTATTGCACTA----- mirL 20 522
-----GCTCTGACTTTATTGCACTACTG----- mirL 23 345
-----CTCTGACTTTATTGCACTACT----- mirL 21 263
-----GCTCTGACTTTATTGCACT----- mirL 19 104
-----TCTGACTTTATTGCACTACT----- mirL 20 28
-----GCTCTGACTTTATTGCAC----- mirL 18 11
-----CTCTGACTTTATTGCACTAC----- mirL 20 11

```

|                                         |             |
|-----------------------------------------|-------------|
| -----GCTCTGACTTTATTGCACTACTGT-----      | mirL 24 10  |
| -----CTCTGACTTTATTGCACTACTG-----        | mirL 22 6   |
| -----CTGACTTTATTGCACTAC-----            | mirL 18 3   |
| -----CTGACTTTATTGCACTACT-----           | mirL 19 2   |
| -----TGCTCTGACTTTATTGCACTAC-----        | mirL 22 2   |
| -----CTCTGACTTTATTGCACTA-----           | mirL 19 2   |
| -----TCTGACTTTATTGCACTACTG-----         | mirL 21 1   |
| -----CTCTGACTTTATTGCACT-----            | mirL 18 1   |
| -----GCTGCTCTGACTTTATTG-----            | mirL 18 1   |
| -----CTGCTCTGACTTTATTGCA-----           | mirL 19 1   |
| -----ACTGTACTTTACAGCGAGCAG-----         | loop 21 1   |
| -----CAGTGCAATAGTATTGTCAAAGCAT-----     | mirR 25 224 |
| -----CAGTGCAATAGTATTGTCAAAGC-----       | mirR 23 206 |
| -----CAGTGCAATAGTATTGTCAAAGCATC-----    | mirR 26 142 |
| -----CAGTGCAATAGTATTGTCAAAGCA-----      | mirR 24 653 |
| -----CAGTGCAATAGTATTGTCAAAG-----        | mirR 22 126 |
| -----CAGTGCAATAGTATTGTCAAAGCATCC-----   | mirR 27 666 |
| -----AGTGCAATAGTATTGTCAAAGCATC-----     | mirR 25 332 |
| -----CAGTGCAATAGTATTGTCAAAG-----        | mirR 21 271 |
| -----AGTGCAATAGTATTGTCAAAGCAT-----      | mirR 24 157 |
| -----AGTGCAATAGTATTGTCAAAGC-----        | mirR 22 621 |
| -----AGTGCAATAGTATTGTCAAAGCATCC-----    | mirR 26 314 |
| -----AGTGCAATAGTATTGTCAAAGCA-----       | mirR 23 214 |
| -----GTGCAATAGTATTGTCAAAGCAT-----       | mirR 23 72  |
| -----GCAGTGCAATAGTATTGTCAAAGCAT-----    | mirR 26 49  |
| -----GTGCAATAGTATTGTCAAAGCATC-----      | mirR 24 43  |
| -----TGCAATAGTATTGTCAAAGCATCC-----      | mirR 24 33  |
| -----GCAGTGCAATAGTATTGTCAAAGC-----      | mirR 24 33  |
| -----AGTGCAATAGTATTGTCAAAG-----         | mirR 21 29  |
| -----AGTGCAATAGTATTGTCAAAG-----         | mirR 20 25  |
| -----TGCAATAGTATTGTCAAAGCATC-----       | mirR 23 20  |
| -----GCAGTGCAATAGTATTGTCAAAGCA-----     | mirR 25 18  |
| -----AGCAGTGCAATAGTATTGTCAAAGCAT-----   | mirR 27 17  |
| -----GCAGTGCAATAGTATTGTCAAAGCATC-----   | mirR 27 15  |
| -----TGCAATAGTATTGTCAAAGCAT-----        | mirR 22 13  |
| -----GTGCAATAGTATTGTCAAAGC-----         | mirR 21 11  |
| -----GTGCAATAGTATTGTCAAAGCA-----        | mirR 22 11  |
| -----TGCAATAGTATTGTCAAAGCATCCG-----     | mirR 25 6   |
| -----GAGCAGTGCAATAGTATTGTCAAAGCAT-----  | mirR 28 6   |
| -----GCAGTGCAATAGTATTGTCAAAGCATCC-----  | mirR 28 5   |
| -----TGCAATAGTATTGTCAAAGCA-----         | mirR 21 5   |
| -----GTGCAATAGTATTGTCAAAGCATCC-----     | mirR 25 4   |
| -----GCAGTGCAATAGTATTGTC-----           | mirR 19 3   |
| -----TGCAATAGTATTGTCAAAGC-----          | mirR 20 2   |
| -----GAGCAGTGCAATAGTATTGTCAAAGCATC----- | mirR 29 1   |
| -----AGCAGTGCAATAGTATTG-----            | mirR 18 1   |

C:\Documents and Settings\hong\Desktop\Reprogramming-total RNA.txt

```
-----AGCAGTGCAATAGTATTGTCAAAGC----- mirR 25 1
-----GTGCAATAGTATTGTCAAAGCATCCG----- mirR 26 1
-----AGCAGTGCAATAGTATTGTCAAAG----- mirR 24 1
-----GTGCAATAGTATTGTCAA----- mirR 19 1
-----GAGCAGTGCAATAGTATTGTCAAAG----- mirR 25 1
-----CCGCGAGCAGGTTGCACACCT----- morR 21 100
-----CCGCGAGCAGGTTGCACACCTTTCTGGTTCTTGT morR 35 35
-----CCGCGAGCAGGTTGCACACCTTTCTGGTTC---- morR 31 32
-----CCGCGAGCAGGTTGCACACC----- morR 20 29
-----CCGCGAGCAGGTTGCACACCTTTCTGGTCTT-- morR 33 26
-----CCGCGAGCAGGTTGCACAC----- morR 19 17
-----CCGCGAGCAGGTTGCACACCTTTCTGGTT---- morR 30 15
-----ATCCGCGAGCAGGTTGCAC----- morR 19 3
-----CATCCGCGAGCAGGTTGC----- morR 18 1
-----CATCCGCGAGCAGGTTGCACAC----- morR 22 1
-----CGCGAGCAGGTTGCACAC----- morR 18 1
-----CGAGCAGGTTGCACACCTTTCTGGTTC---- morR 28 1
-----GCGAGCAGGTTGCACACC----- morR 18 1
```

>mmu-mir-31

```
CTGTAACTCGGAACTGGAGAGGAGGCAAGATGCTGGCATAGCTGTTGAACTGAGAACCTGCTATGCCAACATATTGCCATCTTTCTGTCTGACAGCAGCTTGGCTACCTCCGTCC species len reads
--TAACTCGGAACTGGAGAGG----- morL 19 3
-----TCGGAAGTGGAGAGGAGG----- morL 18 1
--GTAAGTGGAGAGGAGG----- morL 21 1
CTGTAACTCGGAACTGGAG----- morL 19 1
-----CTCGGAAGTGGAGAGGAG----- morL 18 1
-----AGGCAAGATGCTGGCATAGCTGT----- mirL 23 276354
-----AGGCAAGATGCTGGCATAGCTG----- mirL 22 149004
-----AGGCAAGATGCTGGCATAGCT----- mirL 21 134926
-----AGGCAAGATGCTGGCATAGCTGTT----- mirL 24 25574
-----AGGCAAGATGCTGGCATAGC----- mirL 20 17774
-----AGGCAAGATGCTGGCATAGCTGTTG----- mirL 25 9319
-----AGGCAAGATGCTGGCATAG----- mirL 19 4962
-----GGCAAGATGCTGGCATAGCTG----- mirL 21 1188
-----GAGGCAAGATGCTGGCATAGCT----- mirL 22 874
-----GGCAAGATGCTGGCATAGCT----- mirL 20 241
-----GGCAAGATGCTGGCATAGCTGT----- mirL 22 163
-----GAGGCAAGATGCTGGCATAGCTG----- mirL 23 161
-----GGCAAGATGCTGGCATAGC----- mirL 19 89
-----GAGGCAAGATGCTGGCATAGC----- mirL 21 81
-----GAGGCAAGATGCTGGCATAGCTGT----- mirL 24 52
-----GAGGCAAGATGCTGGCATAG----- mirL 20 28
-----GCAAGATGCTGGCATAGCTGT----- mirL 21 28
-----GGCAAGATGCTGGCATAGCTGTT----- mirL 23 24
-----GCAAGATGCTGGCATAGCTG----- mirL 20 19
-----GCAAGATGCTGGCATAGCT----- mirL 19 17
```

```

-----GGAGGCAAGATGCTGGCATAGCTG----- mirL 24 13
-----GGCAAGATGCTGGCATAG----- mirL 18 11
-----GGCAAGATGCTGGCATAGCTGTTG----- mirL 24 11
-----GGAGGCAAGATGCTGGCATAGCTGT----- mirL 25 9
-----CAAGATGCTGGCATAGCTG----- mirL 19 8
-----CAAGATGCTGGCATAGCT----- mirL 18 7
-----GCAAGATGCTGGCATAGCTGTT----- mirL 22 7
-----GAGGCAAGATGCTGGCATAGCTGTT----- mirL 25 7
-----GCAAGATGCTGGCATAGC----- mirL 18 7
-----CAAGATGCTGGCATAGCTGTT----- mirL 21 3
-----CAAGATGCTGGCATAGCTGTTG----- mirL 22 3
-----GGAGGCAAGATGCTGGCATAGCT----- mirL 23 2
-----CAAGATGCTGGCATAGCTGT----- mirL 20 2
-----GAGGCAAGATGCTGGCATA----- mirL 19 2
-----AGGAGGCAAGATGCTGGC----- mirL 18 2
-----CAAGATGCTGGCATAGCTGTTGA----- mirL 23 2
-----GGAGGCAAGATGCTGGCATAG----- mirL 21 1
-----AGGAGGCAAGATGCTGGCATAGCTGT----- mirL 26 1
-----GCAAGATGCTGGCATAGCTGTTG----- mirL 23 1
-----GGAGGCAAGATGCTGGCATAGC----- mirL 22 1
-----TGCTATGCCAACATATTGCCATC----- mirR 23 34117
-----GCTATGCCAACATATTGCCATC----- mirR 22 7645
-----TGCTATGCCAACATATTGCCAT----- mirR 22 6105
-----TGCTATGCCAACATATTGCCATCT----- mirR 24 3937
-----TGCTATGCCAACATATTGCCA----- mirR 21 1347
-----GCTATGCCAACATATTGCCAT----- mirR 21 715
-----GCTATGCCAACATATTGCCATCT----- mirR 23 461
-----TATGCCAACATATTGCCATCT----- mirR 21 354
-----CTATGCCAACATATTGCCATCT----- mirR 22 231
-----CTATGCCAACATATTGCCATC----- mirR 21 226
-----TGCTATGCCAACATATTGCC----- mirR 20 139
-----TATGCCAACATATTGCCATC----- mirR 20 98
-----TGCTATGCCAACATATTGCCATCTT----- mirR 25 77
-----GCTATGCCAACATATTGCCA----- mirR 20 62
-----CTATGCCAACATATTGCCAT----- mirR 20 31
-----CTGCTATGCCAACATATTGCCATC----- mirR 24 23
-----TGCTATGCCAACATATTGC----- mirR 19 22
-----TATGCCAACATATTGCCAT----- mirR 19 17
-----GCTATGCCAACATATTGCCATCTT----- mirR 24 16
-----CTGCTATGCCAACATATTGCC----- mirR 21 16
-----CCTGCTATGCCAACATATTGCCATC----- mirR 25 11
-----TATGCCAACATATTGCCATCTT----- mirR 22 6
-----CTGCTATGCCAACATATTGCCAT----- mirR 23 5
-----CTATGCCAACATATTGCCATCTT----- mirR 23 4
-----ACCTGCTATGCCAACATATTGCCATC----- mirR 26 3
-----CTGCTATGCCAACATATTGCCATCT----- mirR 25 3

```

```

-----CTGCTATGCCAACATATTGCCA----- mirR 22 3
-----CCTGCTATGCCAACATATTGCC----- mirR 22 3
-----TATGCCAACATATTGCCA----- mirR 18 2
-----CCTGCTATGCCAACATATTGCCAT----- mirR 24 2
-----CTATGCCAACATATTGCCA----- mirR 19 2
-----GCTATGCCAACATATTGCC----- mirR 19 2
-----CCTGCTATGCCAACATATTGCCA----- mirR 23 1
-----CCTGCTATGCCAACATATTGC----- mirR 21 1
-----CTGCTATGCCAACATATTGCCATCTT----- mirR 26 1
-----CTATGCCAACATATTGCC----- mirR 18 1
-----GCTATGCCAACATATTGC----- mirR 18 1
-----CTATGCCAACATATTGCCATCTT----- mirR 24 1
-----CCTGCTATGCCAACATATTGCCATCT----- mirR 26 1
-----CTGCTATGCCAACATATTGC----- mirR 20 1
-----TCTTTCCTGTCTGACAGC----- morR 18 4
-----TTTCCTGTCTGACAGCAG----- morR 18 2
-----CCTGTCTGACAGCAGCTT----- morR 18 1
-----TTTCCTGTCTGACAGCAGCTTGGCTACCTCCGTCC morR 35 1
-----TCCTGTCTGACAGCAGCTT----- morR 19 1

```

>mmu-mir-199a-2

```

GCTTCAGGAGATCCTGCTCCGTCGCCCCAGTGTTTCAGACTACCTGTTTCAGGACAATGCCGTTGTACAGTAGTCTGCACATTGGTTAGACTGGGCAAGGGCCAGCAACGCCATGGAC species len reads
-----ATCCTGCTCCGTCGCCCC----- morL 18 114
-----GGAGATCCTGCTCCGTCGC----- morL 19 5
GCTTCAGGAGATCCTGCTCCGTCG----- morL 24 1
-----AGGAGATCCTGCTCCGTC----- morL 18 1
-----CAGGAGATCCTGCTCCGT----- morL 18 1
-----CAGGAGATCCTGCTCCGTCG----- morL 20 1
-----CCCAGTGTTTCAGACTACCTGTT----- mirL 23 288829
-----CCCAGTGTTTCAGACTACCTGTT----- mirL 22 170825
-----CCCAGTGTTTCAGACTACCTGT----- mirL 21 151089
-----CCCAGTGTTTCAGACTACCTGTTCA----- mirL 24 21662
-----CCCAGTGTTTCAGACTACCTG----- mirL 20 9206
-----CCCAGTGTTTCAGACTACCTGTTTCAG----- mirL 25 7805
-----CCCAGTGTTTCAGACTACCT----- mirL 19 3886
-----CCAGTGTTTCAGACTACCTGTT----- mirL 22 202
-----CCAGTGTTTCAGACTACCTGTT----- mirL 21 77
-----CCAGTGTTTCAGACTACCTGT----- mirL 20 68
-----AGTGTTTCAGACTACCTGTT----- mirL 20 41
-----CCCCAGTGTTTCAGACTACCTGT----- mirL 22 30
-----GCCCCAGTGTTTCAGACTACCTGT----- mirL 23 20
-----CCCCAGTGTTTCAGACTACCTGTT----- mirL 24 19
-----CCAGTGTTTCAGACTACCTGTTCA----- mirL 23 18
-----CAGTGTTTCAGACTACCTGTT----- mirL 21 16
-----AGTGTTTCAGACTACCTGT----- mirL 18 13
-----CAGTGTTTCAGACTACCTGTT----- mirL 20 12

```

```

-----CCAGTGTTTCAGACTACCTG----- mirL 19 10
-----CCAGTGTTTCAGACTACCTGTTTCAG----- mirL 24 9
-----AGTGTTTCAGACTACCTGTT----- mirL 19 8
-----GCCCCAGTGTTTCAGACTACCTGTTTC----- mirL 25 7
-----CAGTGTTTCAGACTACCTGT----- mirL 19 7
-----CCAGTGTTTCAGACTACCT----- mirL 18 6
-----CCCCAGTGTTTCAGACTACCTGTT----- mirL 23 5
-----GCCCCAGTGTTTCAGACTACCTGTT----- mirL 24 4
-----AGTGTTTCAGACTACCTGTTCA----- mirL 21 2
-----CGCCCCAGTGTTTCAGACTACCTGT----- mirL 24 2
-----CGCCCCAGTGTTTCAGACTACCTGTTTC----- mirL 26 2
-----CAGTGTTTCAGACTACCTGTTTCAGGACAA----- mirL 28 1
-----GCCCCAGTGTTTCAGACTAC----- mirL 19 1
-----CGCCCCAGTGTTTCAGACTACCTGTT----- mirL 25 1
-----CAGTGTTTCAGACTACCTG----- mirL 18 1
-----CCCCAGTGTTTCAGACTAC----- mirL 18 1
-----CGCCCCAGTGTTTCAGACT----- mirL 18 1
-----CCCCAGTGTTTCAGACTACCTGTTCA----- mirL 25 1
-----AGTGTTTCAGACTACCTGTTTCAG----- mirL 22 1
-----AGGACAATGCCGTTGTAC----- loop 18 4
-----CAGGACAATGCCGTTGTAC----- loop 18 4
-----CAGGACAATGCCGTTGTAC----- loop 19 3
-----TCAGGACAATGCCGTTGTAC----- loop 20 1
-----TTCAGGACAATGCCGTTG----- loop 18 1
-----TTCAGGACAATGCCGTTGTAC----- loop 21 1
-----TTCAGGACAATGCCGTTGTAC----- loop 20 1
-----AGGACAATGCCGTTGTACA----- loop 19 1
-----ACAGTAGTCTGCACATTGGTTAGA----- mirR 24 1161
-----ACAGTAGTCTGCACATTGGTTAGAC----- mirR 25 265
-----TACAGTAGTCTGCACATTGGTTAGA----- mirR 25 112
-----CAGTAGTCTGCACATTGGTTAGA----- mirR 23 100
-----ACAGTAGTCTGCACATTGGTTAGACT----- mirR 26 57
-----TACAGTAGTCTGCACATTGGTTAGAC----- mirR 26 46
-----ACAGTAGTCTGCACATTGGTTAGACTG----- mirR 27 32
-----CAGTAGTCTGCACATTGGTTAGAC----- mirR 24 26
-----CAGTAGTCTGCACATTGGTTAGACT----- mirR 25 11
-----GTAGTCTGCACATTGGTTAGAC----- mirR 22 8
-----ACAGTAGTCTGCACATTGGTTAGACTGG----- mirR 28 7
-----TACAGTAGTCTGCACATTGGTTAGACTG----- mirR 28 4
-----TACAGTAGTCTGCACATTGGTTAGACT----- mirR 27 3
-----ACAGTAGTCTGCACATTGGTTAGACTGGGC----- mirR 30 3
-----CAGTAGTCTGCACATTGGTTAGACTG----- mirR 26 3
-----CAGTAGTCTGCACATTGGTTAGACTGG----- mirR 27 2
-----ACAGTAGTCTGCACATTGGTTAGACTGGG----- mirR 29 2
-----AGTAGTCTGCACATTGGTTAGA----- mirR 22 2
-----CAGTAGTCTGCACATTGGTTAGACTGGG----- mirR 28 2

```



```

-----GTAGTCTGCACATTGGTTAGA----- mirR 21 1
-----CAGTAGTCTGCACATTGGTTAGACTGGGC----- mirR 29 1
-----TACAGTAGTCTGCACATTGGTTAGACTGGGC----- mirR 31 1
-----GACTGGGCAAGGGCCAGCAACG----- morR 22 59
-----GACTGGGCAAGGGCCAGCAA----- morR 20 40
-----GACTGGGCAAGGGCCAGCAAC----- morR 21 37
-----GACTGGGCAAGGGCCAGCAACGC----- morR 23 16
-----GACTGGGCAAGGGCCAGCAACGCCATGGAC morR 30 11
-----GACTGGGCAAGGGCCAGCA----- morR 19 11
-----GACTGGGCAAGGGCCAGCAACGCCATG--- morR 27 11
-----ACTGGGCAAGGGCCAGCA----- morR 18 1

```

>mmu-mir-199a-1

```

CTGAACAGCCATCCCCGCCATCCCAGTGTTCAGACTACCTGTTCAGGAGGCTGGGACATGTACAGTAGTCTGCACATGGTTAGGCTGGGCTTG species len reads
-TGAACAGCCATCCCCGCC----- morL 18 1
CTGAACAGCCATCCCCGC----- morL 18 1
-----CCCAGTGTTCAGACTACCTGTTC----- mirL 23 288828
-----CCCAGTGTTCAGACTACCTGTT----- mirL 22 170826
-----CCCAGTGTTCAGACTACCTGT----- mirL 21 151089
-----CCCAGTGTTCAGACTACCTGTTC----- mirL 24 21662
-----CCCAGTGTTCAGACTACCTG----- mirL 20 9206
-----CCCAGTGTTCAGACTACCTGTTCAG----- mirL 25 7805
-----CCCAGTGTTCAGACTACCT----- mirL 19 3886
-----CCAGTGTTCAGACTACCTGTTC----- mirL 22 202
-----CCAGTGTTCAGACTACCTGTT----- mirL 21 77
-----TCCCAGTGTTCAGACTACCTGTTC----- mirL 24 68
-----CCAGTGTTCAGACTACCTGT----- mirL 20 68
-----AGTGTTCAGACTACCTGTTC----- mirL 20 41
-----TCCCAGTGTTCAGACTACCTGT----- mirL 22 32
-----ATCCCAGTGTTCAGACTACCTGTTC----- mirL 25 21
-----CATCCCAGTGTTCAGACTACCTGTTC----- mirL 26 19
-----CCAGTGTTCAGACTACCTGTTC----- mirL 23 18
-----ATCCCAGTGTTCAGACTACCTGT----- mirL 23 17
-----CAGTGTTCAGACTACCTGTTC----- mirL 21 16
-----AGTGTTCAGACTACCTGT----- mirL 18 13
-----CAGTGTTCAGACTACCTGTT----- mirL 20 12
-----ATCCCAGTGTTCAGACTACCTGTT----- mirL 24 11
-----CCAGTGTTCAGACTACCTG----- mirL 19 10
-----CCAGTGTTCAGACTACCTGTTCAG----- mirL 24 9
-----TCCCAGTGTTCAGACTACCTGTT----- mirL 23 9
-----CATCCCAGTGTTCAGACTACCTGT----- mirL 24 9
-----AGTGTTCAGACTACCTGTT----- mirL 19 8
-----CAGTGTTCAGACTACCTGT----- mirL 19 7
-----CCAGTGTTCAGACTACCT----- mirL 18 6
-----TCCCAGTGTTCAGACTACCTGTTC----- mirL 25 5
-----TCCCAGTGTTCAGACTAC----- mirL 18 4

```

```

-----ATCCCAGTGTTCAGACTACCTGTTCA----- mirL 26 4
-----TCCCAGTGTTCAGACTACCTG----- mirL 21 3
-----ATCCCAGTGTTCAGACTACCTGTTCAG----- mirL 27 3
-----CATCCCAGTGTTCAGACTACCTGTT----- mirL 25 2
-----AGTGTTCAGACTACCTGTTCA----- mirL 21 2
-----TCCCAGTGTTCAGACTACCTGTTCAG----- mirL 26 2
-----ATCCCAGTGTTCAGACTAC----- mirL 19 2
-----CATCCCAGTGTTCAGACTA----- mirL 19 1
-----CATCCCAGTGTTCAGACTACCTGTTCA----- mirL 27 1
-----ATCCCAGTGTTCAGACTA----- mirL 18 1
-----CAGTGTTCAGACTACCTG----- mirL 18 1
-----AGTGTTCAGACTACCTGTTCAG----- mirL 22 1
-----TGGGACATGTACAGTAGTCTGC----- mirR 22 6
-----CTGGGACATGTACAGTAGTCTGC----- mirR 23 2
-----TGGGACATGTACAGTAGTCTG----- mirR 21 2
-----TGGGACATGTACAGTAGTC----- mirR 19 2
-----GACATGTACAGTAGTCTGC----- mirR 19 1
-----TGGGACATGTACAGTAGTCTGCAC----- mirR 24 1
-----GGGACATGTACAGTAGTCTG----- mirR 20 1
-----GGACATGTACAGTAGTCTGCAC----- mirR 22 1
-----TTGGTTAGGCTGGGCTTG morR 18 1

```

>mmu-mir-183

```

GAGAGTGTGACTCCTGTCCCTGTGTATGGCACTGGTAGAATTCAGTGTGAACAGTCTCAGTCAGTGAATTACCGAAGGGCCATAAACAGAGCAGAGACAGATCCGCGAGCACCTTGGAGC species len reads
-----ACTCCTGTCCCTGTGTATG----- morL 18 11
---AGTGTGACTCCTGTCCCTGTGT----- morL 21 8
---GTGTGACTCCTGTCCCTGTGT----- morL 20 4
---AGTGTGACTCCTGTCCCTG----- morL 18 2
---GTGTGACTCCTGTCCCTGT----- morL 18 2
---GTGACTCCTGTCCCTGTGT----- morL 18 2
-----GTGACTCCTGTCCCTGTGTA----- morL 19 1
GAGAGTGTGACTCCTGTCCCTGT----- morL 22 1
---GAGTGTGACTCCTGTCCCTGTGT----- morL 22 1
---GTGTGACTCCTGTCCCTGTG----- morL 19 1
-----ATGGCACTGGTAGAATTCAGT----- mirL 22 177026
-----TATGGCACTGGTAGAATTCAGT----- mirL 23 142694
-----TATGGCACTGGTAGAATTCAGT----- mirL 22 132568
-----ATGGCACTGGTAGAATTCAGT----- mirL 23 62519
-----TATGGCACTGGTAGAATTCAGT----- mirL 24 51835
-----ATGGCACTGGTAGAATTCAGT----- mirL 21 36724
-----TATGGCACTGGTAGAATTCAG----- mirL 21 3689
-----ATGGCACTGGTAGAATTCAGT----- mirL 24 2358
-----TATGGCACTGGTAGAATTCAGT----- mirL 25 2298
-----TATGGCACTGGTAGAATTCAG----- mirL 20 1941
-----ATGGCACTGGTAGAATTCAG----- mirL 20 1510
-----ATGGCACTGGTAGAATTCAGT----- mirL 25 783

```

```

-----TATGGCACTGGTAGAATTCACTGTGA----- mirL 26 740
-----GGCACTGGTAGAATTCACTG----- mirL 20 506
-----ATGGCACTGGTAGAATTC----- mirL 19 350
-----GTATGGCACTGGTAGAATTCACT----- mirL 23 250
-----TGGCACTGGTAGAATTCACTG----- mirL 21 241
-----GGCACTGGTAGAATTCACTGT----- mirL 21 213
-----TGGCACTGGTAGAATTCACTGT----- mirL 22 174
-----GGCACTGGTAGAATTCACT----- mirL 19 142
-----GTATGGCACTGGTAGAATTCACTG----- mirL 24 103
-----TGGCACTGGTAGAATTCACT----- mirL 20 102
-----GTATGGCACTGGTAGAATTCACTGT----- mirL 25 75
-----GCACTGGTAGAATTCACTG----- mirL 19 51
-----GCACTGGTAGAATTCACT----- mirL 18 37
-----GGCACTGGTAGAATTCACTGTG----- mirL 22 28
-----GTATGGCACTGGTAGAATTCAC----- mirL 22 21
-----GCACTGGTAGAATTCACTGT----- mirL 20 11
-----TGTATGGCACTGGTAGAATTCACTG----- mirL 25 9
-----TGTATGGCACTGGTAGAATTCACT----- mirL 24 9
-----TGTATGGCACTGGTAGAATTCAC----- mirL 23 8
-----TGTATGGCACTGGTAGAATTC----- mirL 22 8
-----TGGCACTGGTAGAATTCACTGTGA----- mirL 24 7
-----TGGCACTGGTAGAATTCACTGTG----- mirL 23 6
-----TGGCACTGGTAGAATTCAC----- mirL 19 3
-----GTATGGCACTGGTAGAATTC----- mirL 20 3
-----GTATGGCACTGGTAGAATTC----- mirL 21 3
-----GTATGGCACTGGTAGAATTCACTGTGA----- mirL 27 3
-----TGGCACTGGTAGAATTC----- mirL 18 2
-----GGCACTGGTAGAATTCAC----- mirL 18 1
-----TGTATGGCACTGGTAGAATTCACTGT----- mirL 26 1
-----TGTATGGCACTGGTAGAAT----- mirL 19 1
-----GCACTGGTAGAATTCACTGTG----- mirL 21 1
-----GGCACTGGTAGAATTCACTGTGA----- mirL 23 1
-----GTGAACAGTCTCAGTCAG----- loop 18 69
-----TGTGAACAGTCTCAGTCAGT----- loop 20 17
-----GTGAACAGTCTCAGTCAGT----- loop 19 14
-----TGAACAGTCTCAGTCAGT----- loop 18 3
-----GTGAACAGTCTCAGTCAGTG----- loop 20 1
-----TGAACAGTCTCAGTCAGTGA----- loop 20 1
-----TGTGAACAGTCTCAGTCAGTGA----- loop 22 1
-----TGAATTACCGAAGGGCCATAA----- mirR 21 11089
-----TGAATTACCGAAGGGCCATAAA----- mirR 22 5223
-----GTGAATTACCGAAGGGCCATAA----- mirR 22 4826
-----TGAATTACCGAAGGGCCATA----- mirR 20 4098
-----TGAATTACCGAAGGGCCAT----- mirR 19 1441
-----GTGAATTACCGAAGGGCCATA----- mirR 21 1330
-----GAATTACCGAAGGGCCATAA----- mirR 20 1156

```

C:\Documents and Settings\hong\Desktop\Reprogramming-total RNA.txt

```
-----GTGAATTACCGAAGGGCCATAAA----- mirR 23 941
-----TGAATTACCGAAGGGCCATAAAC----- mirR 23 517
-----GAATTACCGAAGGGCCATAAA----- mirR 21 426
-----GAATTACCGAAGGGCCATA----- mirR 19 397
-----TGAATTACCGAAGGGCCA----- mirR 18 332
-----GTGAATTACCGAAGGGCCAT----- mirR 20 288
-----GAATTACCGAAGGGCCAT----- mirR 18 208
-----GTGAATTACCGAAGGGCCA----- mirR 19 103
-----AGTGAATTACCGAAGGGCCATAA----- mirR 23 97
-----GTGAATTACCGAAGGGCC----- mirR 18 95
-----GTGAATTACCGAAGGGCCATAAAC----- mirR 24 54
-----TGAATTACCGAAGGGCCATAAACA----- mirR 24 41
-----GAATTACCGAAGGGCCATAAAC----- mirR 22 28
-----AGTGAATTACCGAAGGGCCATA----- mirR 22 25
-----ATTACCGAAGGGCCATAA----- mirR 18 15
-----AGTGAATTACCGAAGGGCCATAAA----- mirR 24 12
-----AGTGAATTACCGAAGGGCCAT----- mirR 21 11
-----AGTGAATTACCGAAGGGCCATAAAC----- mirR 25 7
-----AATTACCGAAGGGCCATAA----- mirR 19 7
-----CAGTGAATTACCGAAGGGCCATAA----- mirR 24 6
-----AGTGAATTACCGAAGGGCC----- mirR 19 5
-----AATTACCGAAGGGCCATA----- mirR 18 4
-----ATTACCGAAGGGCCATAAA----- mirR 19 4
-----AGTGAATTACCGAAGGGCCA----- mirR 20 3
-----GAATTACCGAAGGGCCATAAACA----- mirR 23 2
-----CAGTGAATTACCGAAGGG----- mirR 18 1
-----CAGTGAATTACCGAAGGGCCAT----- mirR 22 1
-----AATTACCGAAGGGCCATAAA----- mirR 20 1
-----AGAGCAGAGACAGATCCG----- morR 18 5
-----AACAGAGCAGAGACAGAT----- morR 18 4
-----CAGAGCAGAGACAGATCCGCGA----- morR 22 2
-----ACAGAGCAGAGACAGATC----- morR 18 2
-----CAGAGCAGAGACAGATCCG----- morR 19 2
-----CAGAGCAGAGACAGATCC----- morR 18 1
-----TAAACAGAGCAGAGACAG----- morR 18 1
-----CAGAGCAGAGACAGATCCGCGAGCACCT----- morR 28 1
-----AAACAGAGCAGAGACAGAT----- morR 19 1
-----GAGCAGAGACAGATCCGC----- morR 18 1
-----ACAGAGCAGAGACAGATCCG----- morR 20 1
-----CAGAGCAGAGACAGATCCGCGAGCACCTTGGAGC morR 34 1
```

```
>mmu-mir-26a-2
TACTGTGGAGGCTGCGGCTGGATTCAAGTAATCCAGGATAGGCTGTGTCCGTCATGAGGCCTGTCTTGATTACTTGTTCCTGGAGGCAGCGCATGGTCTGCCCTCAAT species len reads
--CTGTGGAGGCTGCGGCTGGA----- morL 20 11
--TGTGGAGGCTGCGGCTGGA----- morL 19 4
--CTGTGGAGGCTGCGGCTGGAT----- morL 21 3
```

```
--TGTGGAGGCTGCGGCTGGAT----- morL 20 2
-ACTGTGGAGGCTGCGGCT----- morL 18 2
----GTGGAGGCTGCGGCTGGA----- morL 18 2
--CTGTGGAGGCTGCGGCTGGATT----- morL 22 1
----GTGGAGGCTGCGGCTGGAT----- morL 19 1
TACTGTGGAGGCTGCGGCTGGA----- morL 22 1
-ACTGTGGAGGCTGCGGCTGGA----- morL 21 1
----GTGGAGGCTGCGGCTGGATTC----- morL 21 1
--CTGTGGAGGCTGCGGCTG----- morL 18 1
-----TTCAAGTAATCCAGGATAGGCT----- mirL 22 484304
-----TTCAAGTAATCCAGGATAGGCTG----- mirL 23 56163
-----TTCAAGTAATCCAGGATAGGC----- mirL 21 31147
-----TCAAGTAATCCAGGATAGGCT----- mirL 21 20515
-----TTCAAGTAATCCAGGATAGGCTGT----- mirL 24 19143
-----TTCAAGTAATCCAGGATAGG----- mirL 20 10036
-----TTCAAGTAATCCAGGATAG----- mirL 19 6587
-----TCAAGTAATCCAGGATAGGCTG----- mirL 22 5612
-----TTCAAGTAATCCAGGATAGGCTGTG----- mirL 25 4879
-----TCAAGTAATCCAGGATAGGCTGT----- mirL 23 1721
-----TCAAGTAATCCAGGATAGGC----- mirL 20 1288
-----TCAAGTAATCCAGGATAGG----- mirL 19 786
-----TCAAGTAATCCAGGATAG----- mirL 18 754
-----TCAAGTAATCCAGGATAGGCTGTG----- mirL 24 471
-----CAAGTAATCCAGGATAGGCT----- mirL 20 257
-----ATTCAAGTAATCCAGGATAGGCT----- mirL 23 166
-----AAGTAATCCAGGATAGGCT----- mirL 19 120
-----CAAGTAATCCAGGATAGGCTG----- mirL 21 41
-----AAGTAATCCAGGATAGGCTG----- mirL 20 39
-----ATTCAAGTAATCCAGGATAGGC----- mirL 22 26
-----CAAGTAATCCAGGATAGGCTGT----- mirL 22 16
-----CAAGTAATCCAGGATAGGC----- mirL 19 8
-----ATTCAAGTAATCCAGGATAGG----- mirL 21 6
-----AAGTAATCCAGGATAGGCTGT----- mirL 21 5
-----CAAGTAATCCAGGATAGG----- mirL 18 4
-----ATTCAAGTAATCCAGGATAGGCTG----- mirL 24 4
-----AAGTAATCCAGGATAGGC----- mirL 18 4
-----ATTCAAGTAATCCAGGATAG----- mirL 20 3
-----CAAGTAATCCAGGATAGGCTGTG----- mirL 23 3
-----GGATTCAAGTAATCCAGGATAGGCT----- mirL 25 2
-----AAGTAATCCAGGATAGGCTGTG----- mirL 22 2
-----ATTCAAGTAATCCAGGATAGGCTGT----- mirL 25 2
-----ATTCAAGTAATCCAGGATAGGCTGTG----- mirL 26 1
-----GATTCAAGTAATCCAGGATAGGCT----- mirL 24 1
-----GGATTCAAGTAATCCAGGATAGG----- mirL 23 1
-----GGATTCAAGTAATCCAGGATA----- mirL 21 1
-----GGATTCAAGTAATCCAGGATAGGCTG----- mirL 26 1
```

```

-----GATTCAAGTAATCCAGGA----- mirL 18 1
-----GGATTCAAGTAATCCAGGATAGGC----- mirL 24 1
-----GTGTCCGTCCATGAGGCC----- loop 18 8
-----GTGTCCGTCCATGAGGCCT----- loop 19 2
-----GCTGTGTCCGTCCATGAGGC----- loop 20 1
-----CCTGTTCTTGATTACTTGT TTC----- mirR 22 2863
-----CCTGTTCTTGATTACTTGT TTC----- mirR 23 337
-----CCTGTTCTTGATTACTTGT TTC----- mirR 21 295
-----CCTGTTCTTGATTACTTGT TTC----- mirR 20 129
-----CCTGTTCTTGATTACTTGT TTC----- mirR 19 36
-----CCTGTTCTTGATTACTTGT TTC----- mirR 24 22
-----AGGCCTGTTCTTGATTACTTGT TTC----- mirR 23 4
-----GCCTGTTCTTGATTACTTGT TTC----- mirR 22 4
-----CCTGTTCTTGATTACTTGT TTC----- mirR 18 4
-----AGGCCTGTTCTTGATTACTTGT TTC----- mirR 18 3
-----CTGTTCTTGATTACTTGT TTC----- mirR 21 2
-----TGGAGGCAGCGCATGGTCTGC----- morR 21 2
-----AGGCAGCGCATGGTCTGC----- morR 18 1
-----TGGAGGCAGCGCATGGTCTGCCCTCAAT morR 28 1

```

>mmu-mir-26a-1

```

TGGCGAAGGCCGTGGCCTCGTTCAAGTAATCCAGGATAGGCTGTGCAGGTCCCAAGGGGCCTATTCTTGGTTACTTGACGGGACGCGGGCCTGGACGCCG species len reads
--GCGAAGGCCGTGGCCTCG----- morL 18 3
---CGAAGGCCGTGGCCTCG----- morL 18 2
TGGCGAAGGCCGTGGCCTCG----- morL 20 1
--GCGAAGGCCGTGGCCTCGTT----- morL 20 1
-----TTCAAGTAATCCAGGATAGGCT----- mirL 22 484304
-----TTCAAGTAATCCAGGATAGGCTG----- mirL 23 56162
-----TTCAAGTAATCCAGGATAGGC----- mirL 21 31147
-----TCAAGTAATCCAGGATAGGCT----- mirL 21 20515
-----TTCAAGTAATCCAGGATAGGCTGT----- mirL 24 19143
-----TTCAAGTAATCCAGGATAGG----- mirL 20 10036
-----TTCAAGTAATCCAGGATAG----- mirL 19 6587
-----TCAAGTAATCCAGGATAGGCTG----- mirL 22 5612
-----TTCAAGTAATCCAGGATAGGCTGTG----- mirL 25 4879
-----TCAAGTAATCCAGGATAGGCTGT----- mirL 23 1721
-----TCAAGTAATCCAGGATAGGC----- mirL 20 1288
-----TCAAGTAATCCAGGATAGG----- mirL 19 786
-----TCAAGTAATCCAGGATAG----- mirL 18 754
-----TCAAGTAATCCAGGATAGGCTGTG----- mirL 24 471
-----CAAGTAATCCAGGATAGGCT----- mirL 20 257
-----GTTCAAGTAATCCAGGATAGGCT----- mirL 23 158
-----AAGTAATCCAGGATAGGCT----- mirL 19 120
-----CAAGTAATCCAGGATAGGCTG----- mirL 21 41
-----AAGTAATCCAGGATAGGCTG----- mirL 20 39
-----GTTCAAGTAATCCAGGATAGGC----- mirL 22 25

```

```

-----TCGTTCAAGTAATCCAGGATAGGCT----- mirL 25 19
-----CAAGTAATCCAGGATAGGCTGT----- mirL 22 16
-----CGTTCAAGTAATCCAGGATAGGCT----- mirL 24 9
-----CAAGTAATCCAGGATAGGC----- mirL 19 8
-----GTTCAAGTAATCCAGGATAGG----- mirL 21 7
-----AAGTAATCCAGGATAGGCTGT----- mirL 21 5
-----AAGTAATCCAGGATAGGC----- mirL 18 4
-----GTTCAAGTAATCCAGGATAGGCTG----- mirL 24 4
-----CAAGTAATCCAGGATAGG----- mirL 18 4
-----CAAGTAATCCAGGATAGGCTGTG----- mirL 23 3
-----CGTTCAAGTAATCCAGGATAGGC----- mirL 23 2
-----AAGTAATCCAGGATAGGCTGTG----- mirL 22 2
-----GTTCAAGTAATCCAGGATAGGCTGT----- mirL 25 2
-----GTTCAAGTAATCCAGGAT----- mirL 18 1
-----GTTCAAGTAATCCAGGATAG----- mirL 20 1
-----GCAGGTCCCAAGGGGCCT----- loop 18 7
-----GTGCAGGTCCCAAGGGGC----- loop 18 3
-----GCTGTGCAGGTCCCAAGG----- loop 18 1
-----GTGCAGGTCCCAAGGGGCC----- loop 19 1
-----CCTATTCTTGGTTACTTGACG----- mirR 22 1839
-----CCTATTCTTGGTTACTTGCA----- mirR 20 200
-----CCTATTCTTGGTTACTTGACGG----- mirR 23 121
-----CCTATTCTTGGTTACTTGAC----- mirR 21 16
-----TATTCTTGGTTACTTGACG----- mirR 20 8
-----CCTATTCTTGGTTACTTG----- mirR 18 8
-----GGCCTATTCTTGGTTACTTGCA----- mirR 22 6
-----GGCCTATTCTTGGTTAC----- mirR 18 4
-----CCTATTCTTGGTTACTTG----- mirR 19 3
-----CTATTCTTGGTTACTTGACG----- mirR 21 2
-----GGCCTATTCTTGGTTACTTGAC----- mirR 23 1
-----TATTCTTGGTTACTTGAC----- mirR 19 1
-----GGCCTATTCTTGGTTACT----- mirR 19 1
-----GCCTATTCTTGGTTACTT----- mirR 18 1
-----ATTCTTGGTTACTTGAC----- mirR 18 1
-----CTATTCTTGGTTACTTG----- mirR 18 1
-----CGGGGACGCGGGCCTGGA----- morR 18 3
-----GGGACGCGGGCCTGGACGCCG morR 21 1

>mmu-mir-295
ACCAGAGACTCCTTGCTCATCTTGGTGAGACTCAAATGTGGGGCACACTTCTGGACTGTACATAGAAAGTGCTACTACTTTTGGAGTCTCTCCTGTGGGCACCATTACAGGTCGGC species len reads
-----CCTTGCTTGCTCATCTTGGTGA----- morL 22 77
-----TTGCTTGCTCATCTTGGTGAG----- morL 21 4
-----TTGCTTGCTCATCTTGGTGAGA----- morL 22 4
-----CTTGCTTGCTCATCTTGGTGA----- morL 21 3
-----CTTGCTTGCTCATCTTGGTGAG----- morL 22 2
-----GCTTGCTCATCTTGGTGA----- morL 18 2

```

---

|                                       |                |
|---------------------------------------|----------------|
| -----CTTGCTTGCTCATCTTGGTGAGA-----     | morL 23 2      |
| -----CTTGCTCATCTTGGTGAG-----          | morL 18 2      |
| -----TTGCTTGCTCATCTTGGT-----          | morL 18 1      |
| -----TGCTTGCTCATCTTGGTG-----          | morL 18 1      |
| -----TGCTTGCTCATCTTGGTGAGAC-----      | morL 22 1      |
| -----ACTCCTTGCTTGCTCATCTTGGTGAG-----  | morL 26 1      |
| -----CTCCTTGCTTGCTCATCTTGGTGA-----    | morL 24 1      |
| ACCAGAGACTCCTTGCTTGCTCATCTTGGTGA----- | morL 32 1      |
| -----TGCTTGCTCATCTTGGTGAGA-----       | morL 21 1      |
| -----TGCTTGCTCATCTTGGTGAG-----        | morL 20 1      |
| -----TTGCTTGCTCATCTTGGTGA-----        | morL 20 1      |
| -----TGCTTGCTCATCTTGGTGA-----         | morL 19 1      |
| -----ACTCAAATGTGGGGCACACTTCT-----     | mirL 23 115899 |
| -----ACTCAAATGTGGGGCACACTTC-----      | mirL 22 43429  |
| -----GACTCAAATGTGGGGCACACTTCT-----    | mirL 24 18627  |
| -----GACTCAAATGTGGGGCACACTTC-----     | mirL 23 16801  |
| -----GACTCAAATGTGGGGCACACTT-----      | mirL 22 15362  |
| -----ACTCAAATGTGGGGCACACTT-----       | mirL 21 13760  |
| -----ACTCAAATGTGGGGCACACTTCTG-----    | mirL 24 5985   |
| -----ACTCAAATGTGGGGCACAC-----         | mirL 19 3553   |
| -----GACTCAAATGTGGGGCACACT-----       | mirL 21 2026   |
| -----ACTCAAATGTGGGGCACACT-----        | mirL 20 1518   |
| -----GACTCAAATGTGGGGCACACTTCTG-----   | mirL 25 667    |
| -----GACTCAAATGTGGGGCACAC-----        | mirL 20 626    |
| -----ACTCAAATGTGGGGCACACTTCTGG-----   | mirL 25 422    |
| -----CTCAAATGTGGGGCACACTTCT-----      | mirL 22 397    |
| -----GACTCAAATGTGGGGCACACA-----       | mirL 19 106    |
| -----CTCAAATGTGGGGCACACTTC-----       | mirL 21 105    |
| -----TCAAATGTGGGGCACACTTCT-----       | mirL 21 73     |
| -----CAAATGTGGGGCACACTTCT-----        | mirL 20 57     |
| -----CTCAAATGTGGGGCACACTT-----        | mirL 20 46     |
| -----CTCAAATGTGGGGCACACTTCTG-----     | mirL 23 35     |
| -----TCAAATGTGGGGCACACTTC-----        | mirL 20 31     |
| -----CAAATGTGGGGCACACTTC-----         | mirL 19 19     |
| -----AGACTCAAATGTGGGGCACACTTCT-----   | mirL 25 15     |
| -----CTCAAATGTGGGGCACAC-----          | mirL 18 12     |
| -----CTCAAATGTGGGGCACACTTCTGG-----    | mirL 24 9      |
| -----CAAATGTGGGGCACACTTCTG-----       | mirL 21 9      |
| -----AGACTCAAATGTGGGGCACACTTC-----    | mirL 24 7      |
| -----AGACTCAAATGTGGGGCA-----          | mirL 18 4      |
| -----CAAATGTGGGGCACACTT-----          | mirL 18 4      |
| -----CTCAAATGTGGGGCACACT-----         | mirL 19 3      |
| -----TCAAATGTGGGGCACACTTCTG-----      | mirL 22 3      |
| -----AGACTCAAATGTGGGGCACACTT-----     | mirL 23 2      |
| -----AGACTCAAATGTGGGGCACACTTCTG-----  | mirL 26 2      |
| -----TCAAATGTGGGGCACACTT-----         | mirL 19 1      |

---



```

-----GAGACTCAAATGTGGGGCACACT----- mirL 23 1
-----AGACTCAAATGTGGGGCACA----- mirL 20 1
-----TCAAATGTGGGGCACACT----- mirL 18 1
-----AGACTCAAATGTGGGGCACACTTCTGG----- mirL 27 1
-----GAGACTCAAATGTGGGGCA----- mirL 19 1
-----TCAAATGTGGGGCACACTTCTGGACT----- mirL 26 1
-----TCTGGACTGTACATAGAAA----- loop 19 139
-----TCTGGACTGTACATAGAA----- loop 18 26
-----CTGGACTGTACATAGAAA----- loop 18 9
-----AAAGTGCTACTACTTTTGAGTCT----- mirR 23 163438
-----AAGTGCTACTACTTTTGAGTCT----- mirR 22 153974
-----AAGTGCTACTACTTTTGAGTCTC----- mirR 23 16933
-----AAAGTGCTACTACTTTTGAGTCTC----- mirR 24 13627
-----AAAGTGCTACTACTTTTGAGTC----- mirR 22 5402
-----AAGTGCTACTACTTTTGAGTCTCT----- mirR 24 5117
-----AAGTGCTACTACTTTTGAGTC----- mirR 21 3159
-----AAAGTGCTACTACTTTTGAGTCTCT----- mirR 25 2739
-----AGTGCTACTACTTTTGAGTCT----- mirR 21 2399
-----GTGCTACTACTTTTGAGTCTCT----- mirR 22 2146
-----AAAGTGCTACTACTTTTGAGT----- mirR 21 1969
-----GTGCTACTACTTTTGAGTCT----- mirR 20 1396
-----AGTGCTACTACTTTTGAGTCTC----- mirR 22 976
-----AAGTGCTACTACTTTTGAGTCTCTC----- mirR 25 586
-----GTGCTACTACTTTTGAGTCTC----- mirR 21 571
-----AAGTGCTACTACTTTTGAGT----- mirR 20 509
-----AGTGCTACTACTTTTGAGTCTCT----- mirR 23 418
-----AAAGTGCTACTACTTTTGAGTCTCTC----- mirR 26 326
-----GTGCTACTACTTTTGAGTCTCTC----- mirR 23 316
-----AAGTGCTACTACTTTTGAGTCTCTCC----- mirR 26 225
-----AAAGTGCTACTACTTTTG----- mirR 18 198
-----GTGCTACTACTTTTGAGTCTCTCC----- mirR 24 98
-----GAAAGTGCTACTACTTTTGAGTCT----- mirR 24 52
-----GTGCTACTACTTTTGAGTC----- mirR 19 46
-----AGTGCTACTACTTTTGAGTCTCTC----- mirR 24 46
-----AGTGCTACTACTTTTGAGTC----- mirR 20 43
-----AGTGCTACTACTTTTGAGTCTCTCC----- mirR 25 21
-----GAAAGTGCTACTACTTTTGAGT----- mirR 22 19
-----GTGCTACTACTTTTGAGT----- mirR 18 8
-----GAAAGTGCTACTACTTTTGAGTC----- mirR 23 7
-----AGTGCTACTACTTTTGAGT----- mirR 19 3
-----TAGAAAGTGCTACTACTTTTGAGTCT----- mirR 26 2
-----AGAAAGTGCTACTACTTTTGAGTCT----- mirR 25 2
-----GAAAGTGCTACTACTTTTGAGTCTC----- mirR 25 1
-----TAGAAAGTGCTACTACT----- mirR 18 1
-----CTCCTGTGGGCACCATTACACA----- morR 21 27
-----CTCCTGTGGGCACCATTACAG----- morR 22 18

```

```

-----TCTCTCCTGTGGGCACCA----- morR 18 15
-----CTCCTGTGGGCACCATTAC----- morR 20 11
-----TCCTGTGGGCACCATTACAG----- morR 21 7
-----CTCCTGTGGGCACCATTTC----- morR 18 5
-----CTCCTGTGGGCACCATTCA----- morR 19 4
-----CCTGTGGGCACCATTAC----- morR 18 3
-----TCCTGTGGGCACCATTAC----- morR 19 2
-----CTCCTGTGGGCACCATTACAGGTCGCGC morR 28 2
-----CTCCTGTGGGCACCATTACAGGTC--- morR 25 2
-----CCTGTGGGCACCATTACA----- morR 19 1

```

>mmu-mir-218-1

| Species | len | reads  |
|---------|-----|--------|
| morL    | 19  | 3      |
| morL    | 18  | 1      |
| morL    | 18  | 1      |
| morL    | 19  | 1      |
| mirL    | 22  | 278626 |
| mirL    | 23  | 213821 |
| mirL    | 21  | 95496  |
| mirL    | 24  | 13097  |
| mirL    | 21  | 3197   |
| mirL    | 22  | 2501   |
| mirL    | 20  | 2149   |
| mirL    | 25  | 2119   |
| mirL    | 20  | 1625   |
| mirL    | 18  | 459    |
| mirL    | 23  | 257    |
| mirL    | 24  | 91     |
| mirL    | 19  | 84     |
| mirL    | 20  | 74     |
| mirL    | 19  | 33     |
| mirL    | 21  | 26     |
| mirL    | 18  | 22     |
| mirL    | 22  | 19     |
| mirL    | 20  | 5      |
| mirL    | 18  | 5      |
| mirL    | 18  | 4      |
| mirL    | 22  | 2      |
| mirL    | 19  | 2      |
| mirL    | 21  | 1      |
| mirL    | 24  | 1      |
| mirL    | 23  | 1      |
| mirL    | 18  | 1      |
| mirL    | 19  | 1      |
| loop    | 18  | 3      |

```

-----CTTGCGAGGTATGAGAAAA----- loop 20 1
-----AAACATGGTTCCGTCAAGCACC----- mirR 22 351
-----AAACATGGTTCCGTCAAGCACCA----- mirR 23 158
-----AAACATGGTTCCGTCAAGCAC----- mirR 21 109
-----AAACATGGTTCCGTCAAGCA----- mirR 20 64
-----AAACATGGTTCCGTCAAGCACCAT----- mirR 24 48
-----AACATGGTTCCGTCAAGCACC----- mirR 21 41
-----CATGGTTCCGTCAAGCACC----- mirR 20 28
-----AAAAACATGGTTCCGTCA----- mirR 18 27
-----CATGGTTCCGTCAAGCACCATG----- mirR 22 16
-----ACATGGTTCCGTCAAGCACC----- mirR 20 10
-----AACATGGTTCCGTCAAGCACCAT----- mirR 23 10
-----AAACATGGTTCCGTCAAGCACCATG----- mirR 25 7
-----ACATGGTTCCGTCAAGCA----- mirR 18 5
-----AAACATGGTTCCGTCAAGCACCATGGA----- mirR 27 4
-----AACATGGTTCCGTCAAGCACC----- mirR 22 4
-----ACATGGTTCCGTCAAGCACCATG----- mirR 23 3
-----CATGGTTCCGTCAAGCACCAT----- mirR 21 3
-----GAAAAACATGGTTCCGTCA----- mirR 18 2
-----ACATGGTTCCGTCAAGCACCAT----- mirR 22 2
-----AACATGGTTCCGTCAAGCAC----- mirR 20 2
-----CATGGTTCCGTCAAGCACCATGG----- mirR 23 2
-----AAAAACATGGTTCCGTCAA----- mirR 18 2
-----ACATGGTTCCGTCAAGCAC----- mirR 19 2
-----ACATGGTTCCGTCAAGCACCA----- mirR 21 1
-----ACATGGTTCCGTCAAGCACCATGG----- mirR 24 1
-----CATGGTTCCGTCAAGCACC----- mirR 19 1
-----AACATGGTTCCGTCAAGCA----- mirR 19 1
-----AACATGGTTCCGTCAAGCACCATGGA----- mirR 26 1
-----AAAACATGGTTCCGTCAAGCAC----- mirR 22 1
-----CCATGGAACGTCACGCAG----- morR 18 2
-----ATGGAACGTCACGCAGCT----- morR 18 2
-----GAACGTCACGCAGCTTTCTACAGC morR 24 1

>mmu-mir-20a
CCTGCGTGGTGTGTGTGATGTGACAGCTTCTGTAGCACTAAAGTGCTTATAGTGCAGGTAGTGTGTAGCCATCTACTGCATTACGAGCACTTAAAGTACTGCCAGCTGTAGAACTCCAGCCTCGCCTGGCC species
-----ATGTGACAGCTTCTGTAGCAC----- morL 21 1
-----GATGTGACAGCTTCTGTAGCAC----- morL 22 8
-----GTGACAGCTTCTGTAGCAC----- morL 19 6
-----GTGATGTGACAGCTTCTGTAGCAC----- morL 24 1
-----GTGTGTGATGTGACAGCTTCTGTAGCAC----- morL 28 1
-----ATGTGACAGCTTCTGTAGCACT----- morL 22 1
-----GATGTGACAGCTTCTGTAGCACT----- morL 23 1
-----GATGTGACAGCTTCTGTAGCA----- morL 21 1
-----TGTGACAGCTTCTGTAGCAC----- morL 20 9
-----GTGACAGCTTCTGTAGCACT----- morL 20 9

```

-----ATGTGACAGCTTCTGTAGCA----- morL 20 6  
-----TGATGTGACAGCTTCTGTAGCAC----- morL 23 5  
CCTGCGTGGTGTGTGTGATGTGACAGCTTCTGTAG----- morL 35 4  
-----ATGTGACAGCTTCTGTAG----- morL 18 3  
-----ATGTGACAGCTTCTGTAGCACTA----- morL 23 3  
-----GTGACAGCTTCTGTAGCA----- morL 18 2  
-----GTGATGTGACAGCTTCTGTAGCACTA----- morL 26 1  
-----TGTGACAGCTTCTGTAGC----- morL 18 1  
-----GATGTGACAGCTTCTGTAGCACTA----- morL 24 1  
-----TGACAGCTTCTGTAGCACTA----- morL 20 1  
-----ATGTGACAGCTTCTGTAGC----- morL 19 1  
-----TGTGACAGCTTCTGTAGCA----- morL 19 1  
-----TAAAGTGCTTATAGTGCAGGTAG----- mirL 23 3  
-----TAAAGTGCTTATAGTGCAGGTAGT----- mirL 24 8  
-----AAAGTGCTTATAGTGCAGGTAG----- mirL 22 4  
-----TAAAGTGCTTATAGTGCAGGT----- mirL 21 3  
-----TAAAGTGCTTATAGTGCAGGTA----- mirL 22 2  
-----AAAGTGCTTATAGTGCAGGTAGT----- mirL 23 1  
-----TAAAGTGCTTATAGTGCAGGTAGTG----- mirL 25 7  
-----AAAGTGCTTATAGTGCAGGT----- mirL 20 4  
-----AAAGTGCTTATAGTGCAGGTA----- mirL 21 2  
-----TAAAGTGCTTATAGTGCAGG----- mirL 20 2  
-----TAAAGTGCTTATAGTGCAG----- mirL 19 1  
-----AAAGTGCTTATAGTGCAGGTAGTG----- mirL 24 7  
-----CTAAAGTGCTTATAGTGCAGGTAG----- mirL 24 4  
-----AAGTGCTTATAGTGCAGGTAG----- mirL 21 2  
-----AAAGTGCTTATAGTGCAG----- mirL 18 2  
-----AAAGTGCTTATAGTGCAGG----- mirL 19 2  
-----CTAAAGTGCTTATAGTGCAGGTAGT----- mirL 25 7  
-----AAGTGCTTATAGTGCAGGTAGT----- mirL 22 6  
-----ACTAAAGTGCTTATAGTGCAGGTAG----- mirL 25 6  
-----CTAAAGTGCTTATAGTGCAGGTA----- mirL 23 5  
-----CTAAAGTGCTTATAGTGCAGGT----- mirL 22 5  
-----AGTGCTTATAGTGCAGGTAG----- mirL 20 5  
-----AAGTGCTTATAGTGCAGGTA----- mirL 20 3  
-----ACTAAAGTGCTTATAGTGCAGGT----- mirL 23 2  
-----AGTGCTTATAGTGCAGGT----- mirL 18 2  
-----AGTGCTTATAGTGCAGGTA----- mirL 19 2  
-----AAGTGCTTATAGTGCAGGTAGTG----- mirL 23 2  
-----AAGTGCTTATAGTGCAGGT----- mirL 19 1  
-----AAGTGCTTATAGTGCAGG----- mirL 18 1  
-----ACTAAAGTGCTTATAGTGCAGGTAGT----- mirL 26 5  
-----CTAAAGTGCTTATAGTGCAG----- mirL 20 4  
-----AGTGCTTATAGTGCAGGTAGTG----- mirL 22 4  
-----AAGTGCTTATAGTGCAGGTAGTGT----- mirL 24 3  
-----ACTAAAGTGCTTATAGTGCAGGTA----- mirL 24 3

C:\Documents and Settings\hong\Desktop\Reprogramming-total RNA.txt

```
-----AGTGCTTATAGTGCAGGTTAGT----- mirL 21 3
-----ACTAAAGTGCTTATAGTGCAGG----- mirL 22 2
-----CTAAAGTGCTTATAGTGCAGG----- mirL 21 2
-----CACTAAAGTGCTTATAGTGCAGGTTAGT----- mirL 27 2
-----CTAAAGTGCTTATAGTGC----- mirL 18 2
-----CACTAAAGTGCTTATAGTGCAGGTA----- mirL 25 1
-----ACTGCATTACGAGCACTTAAAGT----- mirR 23 1
-----ACTGCATTACGAGCACTTAAA----- mirR 21 3
-----ACTGCATTACGAGCACTTAAAGTA----- mirR 24 1
-----ACTGCATTACGAGCACTTAAAG----- mirR 22 9
-----CTGCATTACGAGCACTTAAAGT----- mirR 22 8
-----ACTGCATTACGAGCACTTA----- mirR 19 7
-----ACTGCATTACGAGCACTTAA----- mirR 20 4
-----ACTGCATTACGAGCACTTAAAGTAC----- mirR 25 1
-----CTGCATTACGAGCACTTAAA----- mirR 20 8
-----CTGCATTACGAGCACTTAA----- mirR 19 3
-----CTGCATTACGAGCACTTAAAGTA----- mirR 23 2
-----GCATTACGAGCACTTAAA----- mirR 18 2
-----CTGCATTACGAGCACTTA----- mirR 18 1
-----TGCATTACGAGCACTTAAA----- mirR 19 1
-----TACTGCATTACGAGCACTTAAA----- mirR 22 1
-----GCATTACGAGCACTTAAAG----- mirR 19 1
-----CTGCATTACGAGCACTTAAAGTACT----- mirR 25 8
-----TCTACTGCATTACGAGCACT----- mirR 20 7
-----TGCATTACGAGCACTTAA----- mirR 18 6
-----CTGCATTACGAGCACTTAAAG----- mirR 21 6
-----TACTGCATTACGAGCACTTA----- mirR 20 4
-----TACTGCATTACGAGCACTT----- mirR 19 3
-----TACTGCATTACGAGCACT----- mirR 18 2
-----TCTACTGCATTACGAGCACTT----- mirR 21 2
-----TACTGCATTACGAGCACTTAAAGTAC----- mirR 26 1
-----CTACTGCATTACGAGCACTTA----- mirR 21 1
-----ACTGCCAGCTGTAGAACTCCAGCCT----- morR 25 8
-----ACTGCCAGCTGTAGAACTCCAGCCTCGCCTGGCC morR 34 4
-----ACTGCCAGCTGTAGAACTCCA----- morR 21 4
-----ACTGCCAGCTGTAGAACTCCAG----- morR 22 1
-----ACTGCCAGCTGTAGAACTCCAGCCTC----- morR 26 1
-----ACTGCCAGCTGTAGAACTCCAGCC----- morR 24 1
-----ACTGCCAGCTGTAGAACTCCAGCCTCGCCTGGC- morR 33 1
-----GCCAGCTGTAGAACTCCA----- morR 18 2
-----CTGCCAGCTGTAGAACTC----- morR 18 1
```

>mmu-mir-205

```
CAGCCCCAGACAATCCATGGGTCCTCTTGTCCTTCATTCCACCGAGTCTGTCTTATGCCAACCAGATTTTCAGTGGAGTGAAGCTCAGGAGGCATGGAGCTGCCAGCGGTGGACTGAAGCAC species len read
-----CAGACAATCCATGGGTCCTCTTG----- morL 23 62
-----CCAGACAATCCATGGGTCCTCTTG----- morL 24 36
```

```

-----CCCAGACAATCCATGGGTCCTCTTG----- morL 25 17
-----ACAATCCATGGGTCCTCTTG----- morL 20 2
-----CCATGGGTCCTCTTGTC----- morL 18 2
-----CAGACAATCCATGGGTCCTCTT----- morL 22 1
-----AGACAATCCATGGGTCCTCTTG----- morL 22 1
-----CAATCCATGGGTCCTCTT----- morL 18 1
-----CAGACAATCCATGGGTCCTCTTGT----- morL 24 1
CAGCCCCAGACAATCCATGGGTCCTCTTG----- morL 29 1
-----CCCCAGACAATCCATGGGTCCTCTTG----- morL 26 1
-----TCCTTCATTCCACCGGAGTCTG----- mirL 22 276979
-----TCCTTCATTCCACCGGAGTCTGT----- mirL 23 170511
-----TCCTTCATTCCACCGGAGTCT----- mirL 21 73366
-----CCTTCATTCCACCGGAGTCTG----- mirL 21 11039
-----TCCTTCATTCCACCGGAGTCT----- mirL 20 9189
-----TCCTTCATTCCACCGGAGTCTGTC----- mirL 24 5293
-----CCTTCATTCCACCGGAGTCTGT----- mirL 22 5038
-----TCCTTCATTCCACCGGAGTCTGTCT----- mirL 25 5034
-----TCCTTCATTCCACCGGAGT----- mirL 19 4889
-----CCTTCATTCCACCGGAGTCT----- mirL 20 2626
-----CCTTCATTCCACCGGAGTCT----- mirL 19 396
-----CCTTCATTCCACCGGAGTCTGTCT----- mirL 24 342
-----CTTCATTCCACCGGAGTCTG----- mirL 20 312
-----CCTTCATTCCACCGGAGT----- mirL 18 289
-----CCTTCATTCCACCGGAGTCTGTC----- mirL 23 234
-----TTCATTCCACCGGAGTCTG----- mirL 19 129
-----GTCCTTCATTCCACCGGAGTCTG----- mirL 23 38
-----CTTCATTCCACCGGAGTCTGT----- mirL 21 31
-----GTCCTTCATTCCACCGGAGTCTGT----- mirL 24 20
-----TTCATTCCACCGGAGTCTGT----- mirL 20 14
-----TTCATTCCACCGGAGTCT----- mirL 18 13
-----GTCCTTCATTCCACCGGAGTCT----- mirL 22 9
-----CTTCATTCCACCGGAGTCT----- mirL 19 7
-----TTGTCCTTCATTCCACCGGAGTCTG----- mirL 25 2
-----TTGTCCTTCATTCCACCGGAGTCT----- mirL 24 2
-----GTCCTTCATTCCACCGGAG----- mirL 19 2
-----GTCCTTCATTCCACCGGA----- mirL 18 1
-----TTGTCCTTCATTCCACCGGAGTCTGT----- mirL 26 1
-----TGTCCTTCATTCCACCGGAGTCTGT----- mirL 25 1
-----CTTCATTCCACCGGAGTCT----- mirL 18 1
-----TGTCCTTCATTCCACCGGAGTCTG----- mirL 24 1
-----TGTCCTTCATTCCACCGGAGT----- mirL 21 1
-----GATTTTCAGTGGAGTGAAGCTCA----- mirR 22 1513
-----GATTTTCAGTGGAGTGAAGCTC----- mirR 21 380
-----GATTTTCAGTGGAGTGAAGCTCAG----- mirR 23 273
-----GATTTTCAGTGGAGTGAAGCT----- mirR 20 148
-----GATTTTCAGTGGAGTGAAGC----- mirR 19 87

```

```

-----GATTTTCAGTGGAGTGAAG----- mirR 18 20
-----GATTTTCAGTGGAGTGAAGCTCAGG----- mirR 24 14
-----TTCAGTGGAGTGAAGCTCA----- mirR 19 13
-----AGATTTTCAGTGGAGTGAAGCTCAG----- mirR 24 8
-----ATTTTCAGTGGAGTGAAGCTC----- mirR 20 4
-----ATTTTCAGTGGAGTGAAGCTCAG----- mirR 22 4
-----ATTTTCAGTGGAGTGAAGCTCA----- mirR 21 4
-----TTCAGTGGAGTGAAGCTC----- mirR 18 3
-----TTCAGTGGAGTGAAGCTCAG----- mirR 20 1
-----TTTCAGTGGAGTGAAGCTCA----- mirR 20 1
-----ATTTTCAGTGGAGTGAAGCT----- mirR 19 1
-----AGATTTTCAGTGGAGTGAAG----- mirR 19 1
-----AGATTTTCAGTGGAGTGAAGCTC----- mirR 22 1
-----TTTCAGTGGAGTGAAGCTCAG----- mirR 21 1
-----CAGATTTTCAGTGGAGTGA----- mirR 18 1
-----CAGATTTTCAGTGGAGTGAAGCT----- mirR 22 1
-----ATTTTCAGTGGAGTGAAGC----- mirR 18 1
-----GGAGGCATGGAGCTGCCAGCGGTGGACTGAAGC-- morR 33 38
-----GGAGGCATGGAGCTGCCAGCGGTGGAC----- morR 27 27
-----GGAGGCATGGAGCTGCCAGCGGTGGA----- morR 26 9
-----GGAGGCATGGAGCTGCCAGCGGTGGACTGAAGCAC morR 35 4
-----GGAGGCATGGAGCTGCCAGCGGTGGACTGA----- morR 30 2
-----GGAGGCATGGAGCTGCCAGCG----- morR 21 2
-----GGAGGCATGGAGCTGCCA----- morR 18 1
-----AGGCATGGAGCTGCCAGC----- morR 18 1

```

>mmu-mir-92a-2

```

GCATCCATGCCCATTCATCCACAGGTGGGGATTGGTGGCATTACTTGTGTTAGATATAAAGTATTGCACCTGTCCCGCCTGAGGAAGAAAGAGGGTTTTTAATC species len reads
--ATCCATGCCCATTCATCCAC----- morL 20 26
--TCCATGCCCATTCATCCAC----- morL 19 19
-CATCCATGCCCATTCATCCA----- morL 20 6
-CATCCATGCCCATTCATCCAC----- morL 21 6
---CCATGCCCATTCATCCAC----- morL 18 6
--ATCCATGCCCATTCATCCA----- morL 19 3
---TGCCCATTCATCCACAGG----- morL 18 2
GCATCCATGCCCATTCATC----- morL 19 1
--ATCCATGCCCATTCATCCACA----- morL 21 1
---CATGCCCATTCATCCACA----- morL 18 1
-----AGGTGGGGATTGGTGGCATTACT----- mirL 23 2437
-----AGGTGGGGATTGGTGGCATT----- mirL 21 526
-----AGGTGGGGATTGGTGGCATTAC----- mirL 22 423
-----AGGTGGGGATTGGTGGCATTACTT----- mirL 24 120
-----AGGTGGGGATTGGTGGCATT----- mirL 20 75
-----AGGTGGGGATTGGTGGCATTACTTG----- mirL 25 24
-----GGTGGGGATTGGTGGCATTACT----- mirL 22 19
-----AGGTGGGGATTGGTGGCA----- mirL 18 19

```

```

-----GGTGGGGATTGGTGGCATTAC----- mirL 21 16
-----GGTGGGGATTGGTGGCATTAC----- mirL 20 10
-----ACAGGTGGGGATTGGTGGCATTAC----- mirL 23 10
-----ACAGGTGGGGATTGGTGGCATTAC----- mirL 24 6
-----GTGGGGATTGGTGGCATTACT----- mirL 21 6
-----GTGGGGATTGGTGGCATTAC----- mirL 20 2
-----GGTGGGGATTGGTGGCATT----- mirL 19 2
-----ACAGGTGGGGATTGGTGG----- mirL 18 2
-----ACAGGTGGGGATTGGTGGCATT----- mirL 22 1
-----CACAGGTGGGGATTGGTGGC----- mirL 20 1
-----GTGGGGATTGGTGGCATTAC----- mirL 19 1
-----GGTGGGGATTGGTGGCAT----- mirL 18 1
-----ACAGGTGGGGATTGGTGGCATTACTTG----- mirL 27 1
-----TGTGTTAGATATAAAAGTA----- loop 18 1
-----ACTTGTGTTAGATATAAAA----- loop 18 1
-----TATTGCACTTGTCCCGGCCTGA----- mirR 22 338645
-----TATTGCACTTGTCCCGGCCTGAGG----- mirR 24 76657
-----TATTGCACTTGTCCCGGCCTGAG----- mirR 23 41354
-----TATTGCACTTGTCCCGGCCTG----- mirR 21 40788
-----ATTGCACTTGTCCCGGCCTGA----- mirR 21 19566
-----TATTGCACTTGTCCCGGCCT----- mirR 20 8788
-----ATTGCACTTGTCCCGGCCTGAGG----- mirR 23 7941
-----TATTGCACTTGTCCCGGC----- mirR 18 7373
-----TATTGCACTTGTCCCGGCC----- mirR 19 4119
-----ATTGCACTTGTCCCGGCCTGAG----- mirR 22 3388
-----ATTGCACTTGTCCCGGCCTG----- mirR 20 3208
-----ATTGCACTTGTCCCGGCCT----- mirR 19 738
-----ATTGCACTTGTCCCGGCC----- mirR 18 376
-----ATTGCACTTGTCCCGGCCTGAGGA----- mirR 24 189
-----GTATTGCACTTGTCCCGGCCTGA----- mirR 23 152
-----TTGCACTTGTCCCGGCCTGAGG----- mirR 22 85
-----TTGCACTTGTCCCGGCCTGA----- mirR 20 66
-----TGCACCTTGTCCCGGCCTGA----- mirR 19 40
-----TTGCACTTGTCCCGGCCTGAG----- mirR 21 34
-----TGCACCTTGTCCCGGCCTGAGG----- mirR 21 23
-----TGCACCTTGTCCCGGCCTG----- mirR 18 17
-----TTGCACTTGTCCCGGCCTGAGGA----- mirR 23 15
-----TGCACCTTGTCCCGGCCTGAG----- mirR 20 14
-----GTATTGCACTTGTCCCGGCCTGAG----- mirR 24 12
-----TTGCACTTGTCCCGGCCTG----- mirR 19 10
-----GTATTGCACTTGTCCCGGCCTGAGG----- mirR 25 9
-----TTGCACTTGTCCCGGCCTGAGGAA----- mirR 24 9
-----AGTATTGCACTTGTCCCGGCCTGA----- mirR 24 7
-----GTATTGCACTTGTCCCGGCCTG----- mirR 22 7
-----TTGCACTTGTCCCGGCCT----- mirR 18 5
-----GTATTGCACTTGTCCCGGCCT----- mirR 21 5

```



```
-----GTATTGCACTTGTCCCGG----- mirR 18 3
-----GTATTGCACTTGTCCCGC----- mirR 19 3
-----AAGTATTGCACTTGTCCCGCCTGA----- mirR 25 2
-----AGTATTGCACTTGTCCCGG----- mirR 19 1
-----AGTATTGCACTTGTCCCGCCT----- mirR 22 1
-----TGAGGAAGAAAGAGGGTTT----- morR 19 4
-----AGGAAGAAAGAGGGTTTT----- morR 18 4
-----GAAGAAAGAGGGTTTTTA----- morR 18 2
-----AAGAAAGAGGGTTTTTAAT----- morR 19 1
-----AGGAAGAAAGAGGGTTTTT----- morR 19 1
-----GAAGAAAGAGGGTTTTTAA----- morR 19 1
-----AAGAAAGAGGGTTTTTAATC morR 20 1

>mmu-mir-484
GGGGGGGGCGGGCCTCGCGGCCCTGCAGCCTCGTCAGGCTCAGTCCCCTCCCGATAAACCTCAAATAGGGTCTTACCTAGGGGGCTGGCGGCGTATTTTTTTTAGCAGGAACCCAGTTTAGGAGTTCTCACTACTGGT
-----TCGCGGCCCTGCAGCCTCGTCA-----
-----TCGCGGCCCTGCAGCCTC-----
-----TCGCGGCCCTGCAGCCTCGT-----
-----CCTCGCGGCCCTGCAGCCTCGT-----
-----GGGCCTCGCGGCCCTGCAGCCT-----
GGGGGGGGCGGGCCTCGCGGCCCTGCAGCC-----
-----CGGCCCTGCAGCCTCGTC-----
GGGGGGGGCGGGCCTCGCGGCCCTGCAGCCTC-----
-----TCAGGCTCAGTCCCCTCCCGAT-----
-----TCAGGCTCAGTCCCCTCCCGATA-----
-----TCAGGCTCAGTCCCCTCCCGA-----
-----TCAGGCTCAGTCCCCTCCCGATAA-----
-----CAGGCTCAGTCCCCTCCCGAT-----
-----TCAGGCTCAGTCCCCTCCCG-----
-----TCAGGCTCAGTCCCCTCCCGATAAA-----
-----TCAGGCTCAGTCCCCTCC-----
-----CAGGCTCAGTCCCCTCCCGATA-----
-----CAGGCTCAGTCCCCTCCCGA-----
-----CAGGCTCAGTCCCCTCCCGATAA-----
-----CAGGCTCAGTCCCCTCCCG-----
-----CGTCAGGCTCAGTCCCCTCCCGA-----
-----AGGCTCAGTCCCCTCCCGATA-----
-----CAGGCTCAGTCCCCTCC-----
-----GTCAGGCTCAGTCCCCTCCCGA-----
-----GGCTCAGTCCCCTCCCGATA-----
-----GTCAGGCTCAGTCCCCTCCCGAT-----
-----CGTCAGGCTCAGTCCCCTCCCGAT-----
-----GGCTCAGTCCCCTCCCGAT-----
-----CAGGCTCAGTCCCCTCCCGATAAA-----
-----CGTCAGGCTCAGTCCCCTCCCGATA-----
-----AGGCTCAGTCCCCTCCCGAT-----
```

```

-----GTCAGGCTCAGTCCCCTCCCGATA-----
-----CGTCAGGCTCAGTCCCCTCC-----
-----AGGCTCAGTCCCCTCCCGA-----
-----TCGTCAGGCTCAGTCCCCTCCCGA-----
-----CGTCAGGCTCAGTCCCCTCCCGATAA-----
-----CGTCAGGCTCAGTCCCCTCCCG-----
-----AGGCTCAGTCCCCTCCCGATAA-----
-----TCGTCAGGCTCAGTCCCCTCCCGATA-----
-----AGGCTCAGTCCCCTCCCG-----
-----TCGTCAGGCTCAGTCCCCTCCC-----
-----TCGTCAGGCTCAGTCCCCTCCCGAT-----
-----CGTCAGGCTCAGTCCCCTCCCGATAAA-----
-----GGCTCAGTCCCCTCCCGA-----
-----GTCAGGCTCAGTCCCCTCCCGATAA-----
-----GGCTCAGTCCCCTCCCGATAAA-----
-----GTCAGGCTCAGTCCCCTCCC-----
-----GTCAGGCTCAGTCCCCTCCCG-----
-----TCGTCAGGCTCAGTCCCCTCCCG-----
-----GTCAGGCTCAGTCCCCTCC-----
-----GGCTCAGTCCCCTCCCGATAA-----
-----TCGTCAGGCTCAGTCCCCT-----
-----TCGTCAGGCTCAGTCCCCTCC-----
-----TTCTCACTACTGGT-----
-----TTCTCACTACTGGT-----
-----TCTCACTACTGGT-----
-----GTTCTCACTACTGGT-----
-----TCTCACTACTGGT-----
-----TTCTCACTACTGGT-----
-----GTTCTCACTACTGGT-----
-----AGTTCTCACTACTGGT-----

```

>mmu-mir-16-2

| Species | len | reads                                                                                                                |
|---------|-----|----------------------------------------------------------------------------------------------------------------------|
| morL 21 | 288 | GATATCTGACATGCTTGTTCCACTCTAGCAGCACGTAAATATTGGCGTAGTGAAATAAATATTAACACCAATATTATTTGTGCTGCTTTAGTGTGACAGGGATATAGCAACTCATT |
| morL 20 | 279 | TCTGACATGCTTGTTCCACTC                                                                                                |
| morL 22 | 171 | CTGACATGCTTGTTCCACTC                                                                                                 |
| morL 19 | 62  | ATCTGACATGCTTGTTCCACTC                                                                                               |
| morL 20 | 36  | TGACATGCTTGTTCCACTC                                                                                                  |
| morL 19 | 33  | TCTGACATGCTTGTTCCACT                                                                                                 |
| morL 21 | 17  | CTGACATGCTTGTTCCACT                                                                                                  |
| morL 22 | 15  | ATCTGACATGCTTGTTCCACTCT                                                                                              |
| morL 18 | 12  | TCTGACATGCTTGTTCCACT                                                                                                 |
| morL 21 | 11  | CTGACATGCTTGTTCCACTCT                                                                                                |
| morL 23 | 9   | TATCTGACATGCTTGTTCCACTC                                                                                              |
| morL 23 | 8   | ATCTGACATGCTTGTTCCACTCT                                                                                              |
| morL 24 | 7   | ATATCTGACATGCTTGTTCCACTC                                                                                             |

|                                 |       |      |    |        |
|---------------------------------|-------|------|----|--------|
| GATATCTGACATGCTTGTTCCTCT        | ----- | mirL | 26 | 1      |
| GATATCTGACATGCTTGTTCCTCA        | ----- | mirL | 22 | 1      |
| -----TGACATGCTTGTTCCTCT         | ----- | mirL | 18 | 1      |
| ---ATCTGACATGCTTGTTCCTCA        | ----- | mirL | 20 | 1      |
| ----CTGACATGCTTGTTCCTCTAG       | ----- | mirL | 23 | 1      |
| ----TGACATGCTTGTTCCTCT          | ----- | mirL | 20 | 1      |
| -----TAGCAGCACGTAATAATTGGCG     | ----- | mirL | 22 | 357057 |
| -----TAGCAGCACGTAATAATTGGCGT    | ----- | mirL | 23 | 99690  |
| -----TAGCAGCACGTAATAATTGG       | ----- | mirL | 20 | 43876  |
| -----TAGCAGCACGTAATAATTGGC      | ----- | mirL | 21 | 14180  |
| -----TAGCAGCACGTAATAATTGGCGTA   | ----- | mirL | 24 | 6532   |
| -----AGCAGCACGTAATAATTGGCG      | ----- | mirL | 21 | 6235   |
| -----AGCAGCACGTAATAATTGGCGT     | ----- | mirL | 22 | 3804   |
| -----TAGCAGCACGTAATAATTGGCGTAG  | ----- | mirL | 25 | 2297   |
| -----AGCAGCACGTAATAATTGGC       | ----- | mirL | 20 | 686    |
| -----AGCAGCACGTAATAATTGG        | ----- | mirL | 19 | 646    |
| -----TAGCAGCACGTAATAATTG        | ----- | mirL | 19 | 404    |
| -----AGCAGCACGTAATAATTGGCGTA    | ----- | mirL | 23 | 394    |
| -----AGCAGCACGTAATAATTGGCGTAG   | ----- | mirL | 24 | 160    |
| -----GCAGCACGTAATAATTGGCG       | ----- | mirL | 20 | 95     |
| -----CAGCACGTAATAATTGGCG        | ----- | mirL | 19 | 48     |
| -----AGCAGCACGTAATAATTG         | ----- | mirL | 18 | 34     |
| -----GCAGCACGTAATAATTGGCGTA     | ----- | mirL | 22 | 28     |
| -----GCAGCACGTAATAATTGGCGT      | ----- | mirL | 21 | 25     |
| -----CTAGCAGCACGTAATAATTGGC     | ----- | mirL | 22 | 12     |
| -----CAGCACGTAATAATTGGCGT       | ----- | mirL | 20 | 7      |
| -----GCAGCACGTAATAATTGGC        | ----- | mirL | 19 | 6      |
| -----CTAGCAGCACGTAATAATTGGCGT   | ----- | mirL | 24 | 6      |
| -----CTAGCAGCACGTAATAATTGGCG    | ----- | mirL | 23 | 5      |
| -----CAGCACGTAATAATTGGC         | ----- | mirL | 18 | 3      |
| -----TCTAGCAGCACGTAATAATTGGCG   | ----- | mirL | 24 | 2      |
| -----CAGCACGTAATAATTGGCGTA      | ----- | mirL | 21 | 2      |
| -----GCAGCACGTAATAATTGG         | ----- | mirL | 18 | 1      |
| -----TCTAGCAGCACGTAATAATTGGCGTA | ----- | mirL | 26 | 1      |
| -----CTAGCAGCACGTAATAATTGGCGTA  | ----- | mirL | 25 | 1      |
| -----CAGCACGTAATAATTGGCGTAG     | ----- | mirL | 22 | 1      |
| -----CTAGCAGCACGTAATAATTGG      | ----- | mirL | 21 | 1      |
| -----GCAGCACGTAATAATTGGCGTAG    | ----- | mirL | 23 | 1      |
| -----TAGTGAAATAAATATTTAAACA     | ----- | loop | 21 | 8      |
| -----TAGTGAAATAAATATTTAAACAC    | ----- | loop | 22 | 1      |
| -----GTGAAATAAATATTTAAAC        | ----- | loop | 18 | 1      |
| -----GTAGTGAAATAAATATTTAA       | ----- | loop | 19 | 1      |
| -----ACCAATATTATGTGCTGCTTT      | ----- | mirR | 22 | 4465   |
| -----ACCAATATTATGTGCTGCTTTA     | ----- | mirR | 23 | 1082   |
| -----CCAATATTATGTGCTGCTTTA      | ----- | mirR | 22 | 839    |
| -----ACCAATATTATGTGCTGCTT       | ----- | mirR | 21 | 549    |

```

-----CCAATATTATTGTGCTGCTTT----- mirR 21 289
-----ACCAATATTATTGTGCTGCTTTAG----- mirR 24 110
-----ACCAATATTATTGTGCTGCT----- mirR 20 74
-----CCAATATTATTGTGCTGCTT----- mirR 20 43
-----CCAATATTATTGTGCTGCTTTAG----- mirR 23 30
-----ACCAATATTATTGTGCTG----- mirR 18 28
-----ACCAATATTATTGTGCTGC----- mirR 19 11
-----CCAATATTATTGTGCTGC----- mirR 18 6
-----CACCAATATTATTGTGCTGCTT----- mirR 22 6
-----CCAATATTATTGTGCTGCT----- mirR 19 5
-----CACCAATATTATTGTGCTGCTTT----- mirR 23 4
-----AACACCAATATTATTGTGCTGCT----- mirR 23 4
-----AATATTATTGTGCTGCTTTA----- mirR 20 3
-----AACACCAATATTATTGTGCTGCTT----- mirR 24 3
-----AACACCAATATTATTGTGCTGCTTT----- mirR 25 3
-----CAATATTATTGTGCTGCTTTA----- mirR 21 2
-----ACACCAATATTATTGTGCTGCTT----- mirR 23 2
-----AATATTATTGTGCTGCTTTAGT----- mirR 22 2
-----AATATTATTGTGCTGCTTT----- mirR 19 1
-----ACACCAATATTATTGTGC----- mirR 18 1
-----CAATATTATTGTGCTGCTTT----- mirR 20 1
-----CCAATATTATTGTGCTGCTTTAGT----- mirR 24 1
-----CACCAATATTATTGTGCTGCTTTAG----- mirR 25 1
-----AACACCAATATTATTGTGCTGCT----- mirR 22 1
-----CACCAATATTATTGTGCTGCTTTA----- mirR 24 1
-----GTGTGACAGGGATATAGCAACTCA-- morR 24 19
-----GTGTGACAGGGATATAGCAACT---- morR 22 7
-----GTGTGACAGGGATATAGCAA----- morR 20 6
-----GTGTGACAGGGATATAGCAACTCATT morR 26 3
-----GTGTGACAGGGATATAGCAAC----- morR 21 2
-----GTGTGACAGGGATATAGCA----- morR 19 1
-----GTGTGACAGGGATATAGCAACTCAT- morR 25 1

```

>mmu-mir-16-1

```

ATGATAGCAATGTCAGCGGTGCCTTAGCAGCACGTAATATTGGCGTTAAGATTCTGAAATTACCTCCAGTATTGACTGTGCTGCTGAAGTAAGGTTGGCAATACTCTACAACCTGTA species len reads
----TAGCAATGTCAGCGGTGCCT----- morL 20 542
----AGCAATGTCAGCGGTGCCT----- morL 19 537
----GCAATGTCAGCGGTGCCT----- morL 18 122
----ATAGCAATGTCAGCGGTGCCT----- morL 21 66
----AGCAATGTCAGCGGTGCCTT----- morL 20 44
----TAGCAATGTCAGCGGTGCCTT----- morL 21 40
----TAGCAATGTCAGCGGTGC----- morL 18 33
----AGCAATGTCAGCGGTGCC----- morL 18 23
----TAGCAATGTCAGCGGTGCC----- morL 19 13
----GCAATGTCAGCGGTGCCTT----- morL 19 10
----AGCAATGTCAGCGGTGCCTTA----- morL 21 9

```

```
-----AGCAATGTCAGCGGTGCCTTAG----- morL 22 5
---ATAGCAATGTCAGCGGTGCCTT----- morL 22 4
---ATAGCAATGTCAGCGGTGC----- morL 19 3
-----ATGTCAGCGGTGCCTTAG----- morL 18 3
---TAGCAATGTCAGCGGTGCCTTAG----- morL 23 3
---TAGCAATGTCAGCGGTGCCTTA----- morL 22 2
-TGATAGCAATGTCAGCGGTGCCT----- morL 23 2
ATGATAGCAATGTCAGCGGTGC----- morL 22 1
---ATAGCAATGTCAGCGGTGCCTTA----- morL 23 1
-----CAATGTCAGCGGTGCCTT----- morL 18 1
-----TAGCAGCACGTAAATATTGGCG----- mirL 22 357057
-----TAGCAGCACGTAAATATTGGCGT----- mirL 23 99689
-----TAGCAGCACGTAAATATTGG----- mirL 20 43876
-----TAGCAGCACGTAAATATTGGC----- mirL 21 14180
-----TAGCAGCACGTAAATATTGGCGTT----- mirL 24 10103
-----AGCAGCACGTAAATATTGGCG----- mirL 21 6235
-----AGCAGCACGTAAATATTGGCGT----- mirL 22 3804
-----TAGCAGCACGTAAATATTGGCGTTA----- mirL 25 2148
-----AGCAGCACGTAAATATTGGC----- mirL 20 686
-----AGCAGCACGTAAATATTGGCGTT----- mirL 23 668
-----AGCAGCACGTAAATATTGG----- mirL 19 646
-----TAGCAGCACGTAAATATTG----- mirL 19 404
-----AGCAGCACGTAAATATTGGCGTTA----- mirL 24 156
-----GCAGCACGTAAATATTGGCG----- mirL 20 95
-----TTAGCAGCACGTAAATATTGGCG----- mirL 23 86
-----CAGCACGTAAATATTGGCG----- mirL 19 48
-----AGCAGCACGTAAATATTG----- mirL 18 34
-----GCAGCACGTAAATATTGGCGT----- mirL 21 25
-----TTAGCAGCACGTAAATATTGGCGT----- mirL 24 22
-----TTAGCAGCACGTAAATATTGGC----- mirL 22 13
-----CAGCACGTAAATATTGGCGT----- mirL 20 7
-----GCAGCACGTAAATATTGGCGTT----- mirL 22 6
-----GCAGCACGTAAATATTGGC----- mirL 19 6
-----CCTTAGCAGCACGTAAATATTGGCGT----- mirL 26 4
-----CAGCACGTAAATATTGGC----- mirL 18 3
-----GCAGCACGTAAATATTGGCGTTA----- mirL 23 3
-----TTAGCAGCACGTAAATATTGGCGTT----- mirL 25 3
-----CAGCACGTAAATATTGGCGTT----- mirL 21 2
-----CTTAGCAGCACGTAAATATTGGCG----- mirL 24 1
-----CTTAGCAGCACGTAAATATTG----- mirL 21 1
-----TTAGCAGCACGTAAATATTGGCGTTA----- mirL 26 1
-----CTTAGCAGCACGTAAATATTGGCGT----- mirL 25 1
-----GCAGCACGTAAATATTGGCGTTAA----- mirL 24 1
-----CAGCACGTAAATATTGGCGTTA----- mirL 22 1
-----CTTAGCAGCACGTAAATATTGGCGTT----- mirL 26 1
-----CTTAGCAGCACGTAAATA----- mirL 18 1
```

```

-----GCAGCACGTAAATATTGG----- mirL 18 1
-----TTAAGATTCTGAAATTACCT----- loop 20 258
-----TAAGATTCTGAAATTACCT----- loop 19 47
-----TTAAGATTCTGAAATTACC----- loop 19 13
-----TTAAGATTCTGAAATTACCTC----- loop 21 11
-----TTAAGATTCTGAAATTACCTCC----- loop 22 5
-----AAGATTCTGAAATTACCT----- loop 18 4
-----TAAGATTCTGAAATTACCTC----- loop 20 3
-----TTAAGATTCTGAAATTACCTCCA----- loop 23 2
-----TAAGATTCTGAAATTACCTCC----- loop 21 2
-----AGATTCTGAAATTACCTC----- loop 18 2
-----TAAGATTCTGAAATTACC----- loop 18 1
-----TTAAGATTCTGAAATTAC----- loop 18 1
-----CGTTAAGATTCTGAAATTACCTCC----- loop 24 1
-----CCAGTATTGACTGTGCTGCTGAA----- mirR 23 369
-----CCAGTATTGACTGTGCTGCTGA----- mirR 22 89
-----CCTCCAGTATTGACTGTGCTGCT----- mirR 23 28
-----TCCAGTATTGACTGTGCTGCTGA----- mirR 23 24
-----CCAGTATTGACTGTGCTGCTGAAG----- mirR 24 13
-----CTCCAGTATTGACTGTGCTGCTGA----- mirR 24 12
-----CCAGTATTGACTGTGCTGCTG----- mirR 21 11
-----TCCAGTATTGACTGTGCTGCTG----- mirR 22 9
-----CCAGTATTGACTGTGCTGCTG----- mirR 19 9
-----TCCAGTATTGACTGTGCTGCT----- mirR 21 9
-----CTCCAGTATTGACTGTGCTGCTG----- mirR 23 6
-----CTCCAGTATTGACTGTGCTGCTGAA----- mirR 25 5
-----CCAGTATTGACTGTGCTG----- mirR 18 5
-----AGTATTGACTGTGCTGCTGAAG----- mirR 22 4
-----CCTCCAGTATTGACTGTGCTGCTG----- mirR 22 3
-----CCAGTATTGACTGTGCTGCTGAAGT----- mirR 25 3
-----TCCAGTATTGACTGTGCTGCTGAA----- mirR 24 3
-----CCTCCAGTATTGACTGTGCTGCTG----- mirR 24 2
-----AGTATTGACTGTGCTGCTGA----- mirR 20 2
-----TCCAGTATTGACTGTGCTGCTGAAG----- mirR 25 2
-----CCTCCAGTATTGACTGTGCTGCTGAA----- mirR 26 2
-----TCCAGTATTGACTGTGCTGCTG----- mirR 20 1
-----CCTCCAGTATTGACTGTGCTGCTGA----- mirR 25 1
-----AGTATTGACTGTGCTGCTGAA----- mirR 21 1
-----CTCCAGTATTGACTGTGCTGCT----- mirR 22 1
-----CAGTATTGACTGTGCTGCTGAA----- mirR 22 1
-----TCCAGTATTGACTGTGCTGCTGAAGTA----- mirR 27 1
-----CCTCCAGTATTGACTGTG----- mirR 18 1
-----CAGTATTGACTGTGCTGCTGA----- mirR 21 1
-----CTCCAGTATTGACTGTGCT----- mirR 18 1
-----GTAAGGTTGGCAATACTCT----- morR 19 2
-----AAGTAAGGTTGGCAATACTCTAC----- morR 23 2

```

```

-----AAGTAAGGTTGGCAATACT----- morR 19 1
-----GTAAGGTTGGCAATACTCTAC----- morR 21 1
-----GTAAGGTTGGCAATACTCTACAACCTGTA morR 28 1
-----AGGTTGGCAATACTCTAC----- morR 18 1
-----GTAAGGTTGGCAATACTCTA----- morR 20 1

```

>mmu-mir-140

| Sequence                                                                                                    | species | len | reads |
|-------------------------------------------------------------------------------------------------------------|---------|-----|-------|
| CCCTGTTGTCTCTCTCTGTGTCCTGCCAGTGGTTTTACCTATGGTAGGTTACGTCATGCTGTTCTACCACAGGGTAGAACCCAGGACAGGGTACTGGAGCACCTCTG | morL    | 20  | 105   |
| -----TGTTCTCTCTCTGTGTCCTGC-----                                                                             | morL    | 19  | 69    |
| -----GTCTCTCTCTGTGTCCTGC-----                                                                               | morL    | 21  | 21    |
| -----GTGTCTCTCTCTGTGTCCTGC-----                                                                             | morL    | 27  | 15    |
| CCCTGTTGTCTCTCTCTGTGTCCTGC-----                                                                             | morL    | 18  | 11    |
| -----TCTCTCTCTGTGTCCTGC-----                                                                                | morL    | 21  | 9     |
| -----TGTTCTCTCTCTGTGTCCTGCC-----                                                                            | morL    | 19  | 8     |
| -----GTGTCTCTCTCTGTGTCCT-----                                                                               | morL    | 18  | 6     |
| -----GTCTCTCTCTGTGTCCTGC-----                                                                               | morL    | 20  | 4     |
| -----GTCTCTCTCTGTGTCCTGCC-----                                                                              | morL    | 19  | 3     |
| -----TGTTCTCTCTCTGTGTCCTGC-----                                                                             | morL    | 18  | 2     |
| -----TGTTCTCTCTCTGTGTCCT-----                                                                               | morL    | 23  | 2     |
| -----GTGTCTCTCTCTGTGTCCTGC-----                                                                             | morL    | 22  | 1     |
| -----TCTCTCTGTGTCCTGCCA-----                                                                                | morL    | 18  | 1     |
| -----CTCTCTGTGTCCTGCCAG-----                                                                                | morL    | 18  | 1     |
| -----GTCTCTCTCTGTGTCCTGCCA-----                                                                             | morL    | 21  | 1     |
| -----TGTTCTCTCTGTGTCCTGCCA-----                                                                             | morL    | 22  | 1     |
| -----CAGTGGTTTTACCCTATGGTAG-----                                                                            | mirL    | 22  | 11773 |
| -----CAGTGGTTTTACCCTATGGTAGG-----                                                                           | mirL    | 23  | 5143  |
| -----CAGTGGTTTTACCCTATGGT-----                                                                              | mirL    | 20  | 2219  |
| -----CAGTGGTTTTACCCTATGGTA-----                                                                             | mirL    | 21  | 1680  |
| -----AGTGGTTTTACCCTATGGTAG-----                                                                             | mirL    | 21  | 274   |
| -----CAGTGGTTTTACCCTATGGTAGGT-----                                                                          | mirL    | 24  | 267   |
| -----CAGTGGTTTTACCCTATGG-----                                                                               | mirL    | 19  | 213   |
| -----AGTGGTTTTACCCTATGGTAGG-----                                                                            | mirL    | 22  | 159   |
| -----CAGTGGTTTTACCCTATG-----                                                                                | mirL    | 18  | 155   |
| -----CCAGTGGTTTTACCCTATGGTA-----                                                                            | mirL    | 22  | 114   |
| -----CCAGTGGTTTTACCCTATGGT-----                                                                             | mirL    | 21  | 46    |
| -----GTGGTTTTACCCTATGGTAG-----                                                                              | mirL    | 20  | 40    |
| -----AGTGGTTTTACCCTATGGTA-----                                                                              | mirL    | 20  | 30    |
| -----CCAGTGGTTTTACCCTATGGTAGG-----                                                                          | mirL    | 24  | 22    |
| -----CCAGTGGTTTTACCCTATGGTAG-----                                                                           | mirL    | 23  | 19    |
| -----AGTGGTTTTACCCTATGGTAGGT-----                                                                           | mirL    | 23  | 18    |
| -----AGTGGTTTTACCCTATGGT-----                                                                               | mirL    | 19  | 11    |
| -----AGTGGTTTTACCCTATGGTAGGTT-----                                                                          | mirL    | 24  | 9     |
| -----CCAGTGGTTTTACCCTATGG-----                                                                              | mirL    | 20  | 9     |
| -----CCAGTGGTTTTACCCTATG-----                                                                               | mirL    | 19  | 5     |
| -----GCCAGTGGTTTTACCCTA-----                                                                                | mirL    | 18  | 4     |

```

-----GTGGTTTTACCCTATGGT----- mirL 18 2
-----GTGGTTTTACCCTATGGTAGG----- mirL 21 2
-----TGCCAGTGGTTTTACCCT----- mirL 18 1
-----AGTGGTTTTACCCTATGGTAGGTTAC----- mirL 26 1
-----TACGTCATGCTGTTCTAC----- loop 18 35
-----GGTTACGTCATGCTGTTCTA----- loop 20 28
-----GTTACGTCATGCTGTTCT----- loop 18 14
-----TTACGTCATGCTGTTCTAC----- loop 19 8
-----GTTACGTCATGCTGTTCTAC----- loop 20 2
-----GGTTACGTCATGCTGTTCTAC----- loop 21 1
-----GGTTACGTCATGCTGTTCT----- loop 19 1
-----AGGTTACGTCATGCTGTT----- loop 18 1
-----AGGTTACGTCATGCTGTT----- loop 19 1
-----ACCACAGGGTAGAACCACGGAC----- mirR 22 171449
-----ACCACAGGGTAGAACCACGGACA----- mirR 23 99695
-----ACCACAGGGTAGAACCACGGGA----- mirR 21 79604
-----TACCACAGGGTAGAACCACGGGA----- mirR 22 44650
-----TACCACAGGGTAGAACCACGGACA----- mirR 24 42579
-----TACCACAGGGTAGAACCACGGAC----- mirR 23 33222
-----ACCACAGGGTAGAACCACGGACAG----- mirR 24 11061
-----ACCACAGGGTAGAACCACGG----- mirR 20 7584
-----TACCACAGGGTAGAACCACGG----- mirR 21 5856
-----CCACAGGGTAGAACCACGGACA----- mirR 22 5236
-----ACCACAGGGTAGAACCACGGACAGG----- mirR 25 3077
-----TACCACAGGGTAGAACCACG----- mirR 20 2162
-----CCACAGGGTAGAACCACGGAC----- mirR 21 2159
-----TACCACAGGGTAGAACCACGGACAG----- mirR 25 1890
-----ACCACAGGGTAGAACCACG----- mirR 19 1591
-----CCACAGGGTAGAACCACGGGA----- mirR 20 1021
-----CCACAGGGTAGAACCACGGACAG----- mirR 23 425
-----TACCACAGGGTAGAACCACGGACAGG----- mirR 26 300
-----CACAGGGTAGAACCACGGACA----- mirR 21 172
-----CCACAGGGTAGAACCACGG----- mirR 19 152
-----CCACAGGGTAGAACCACGGACAGG----- mirR 24 114
-----ACAGGGTAGAACCACGGACA----- mirR 20 79
-----CCACAGGGTAGAACCACG----- mirR 18 71
-----CACAGGGTAGAACCACGGGA----- mirR 19 69
-----ACAGGGTAGAACCACGGGA----- mirR 18 60
-----CACAGGGTAGAACCACGGACAG----- mirR 22 40
-----CACAGGGTAGAACCACGGAC----- mirR 20 27
-----ACAGGGTAGAACCACGGACAGGG----- mirR 23 16
-----CTACCACAGGGTAGAACCACGGACA----- mirR 25 12
-----CTACCACAGGGTAGAACCACGGGA----- mirR 23 11
-----ACAGGGTAGAACCACGGACAG----- mirR 21 7
-----CACAGGGTAGAACCACGG----- mirR 18 7
-----ACAGGGTAGAACCACGGAC----- mirR 19 7

```



```

-----CACAGGGTAGAACCACGGACAGG----- mirR 23 7
-----CTACCACAGGGTAGAACCACGGAC----- mirR 24 4
-----CTACCACAGGGTAGAACCA----- mirR 19 3
-----TCTACCACAGGGTAGAACCACGGAC----- mirR 25 3
-----CACAGGGTAGAACCACGGACAGGG----- mirR 24 3
-----TCTACCACAGGGTAGAACCACGGACA----- mirR 26 3
-----CTACCACAGGGTAGAACCACGG----- mirR 22 1
-----CTACCACAGGGTAGAACCACG----- mirR 21 1
-----CAGGGTACTGGAGCACCC----- morR 18 2
-----GACAGGGTACTGGAGCAC----- morR 18 1
-----AGGGTACTGGAGCACCCCT----- morR 18 1
-----GGGTACTGGAGCACCCCTCTG morR 20 1

```

>mmu-mir-291a

| Sequence                                                                                                               | species | len | reads  |
|------------------------------------------------------------------------------------------------------------------------|---------|-----|--------|
| GGAGCTGTTACACCTATGTAGCGGCCATCAAAGTGGAGGCCCTCTCTTGTAGCCCTGAATGAGAAAGTGCTTCCACTTTGTGTGCCACTGCATGGGGAAAACATCATAGCTTTGCATC | morL    | 19  | 79     |
| -----GTTACACCTATGTAGCGGC-----                                                                                          | morL    | 20  | 71     |
| -----TGTTACACCTATGTAGCGGC-----                                                                                         | morL    | 20  | 25     |
| -----GTTACACCTATGTAGCGGCC-----                                                                                         | morL    | 21  | 17     |
| -----TGTTACACCTATGTAGCGGCC-----                                                                                        | morL    | 18  | 16     |
| -----TTACACCTATGTAGCGGCC-----                                                                                          | morL    | 19  | 5      |
| -----TACACCTATGTAGCGGCC-----                                                                                           | morL    | 18  | 4      |
| -----TACACCTATGTAGCGGCCA-----                                                                                          | morL    | 19  | 3      |
| -----GTTACACCTATGTAGCGGCCA-----                                                                                        | morL    | 21  | 2      |
| -----TTACACCTATGTAGCGGCCA-----                                                                                         | morL    | 20  | 1      |
| -----TGTTACACCTATGTAGCGG-----                                                                                          | morL    | 19  | 1      |
| -----TGTTACACCTATGTAGCGGCCA-----                                                                                       | morL    | 22  | 1      |
| -----CTGTACACCTATGTAGCGGC-----                                                                                         | morL    | 21  | 1      |
| GGAGCTGTTACACCTATGTAGCGG-----                                                                                          | morL    | 24  | 1      |
| -----TGTTACACCTATGTAGCG-----                                                                                           | morL    | 18  | 1      |
| GGAGCTGTTACACCTATGTAGCGGC-----                                                                                         | morL    | 25  | 1      |
| -----CATCAAAGTGGAGGCCCTCTCT-----                                                                                       | mirL    | 22  | 270648 |
| -----CATCAAAGTGGAGGCCCTCTCTT-----                                                                                      | mirL    | 23  | 74086  |
| -----CATCAAAGTGGAGGCCCTCTCTTG-----                                                                                     | mirL    | 24  | 47350  |
| -----CATCAAAGTGGAGGCCCTCT-----                                                                                         | mirL    | 20  | 14649  |
| -----CATCAAAGTGGAGGCCCTCTC-----                                                                                        | mirL    | 21  | 12967  |
| -----CATCAAAGTGGAGGCCCTC-----                                                                                          | mirL    | 19  | 9515   |
| -----CATCAAAGTGGAGGCCCTCTCTGA-----                                                                                     | mirL    | 25  | 7623   |
| -----CCATCAAAGTGGAGGCCCTCTCT-----                                                                                      | mirL    | 23  | 4758   |
| -----ATCAAAGTGGAGGCCCTCTCTT-----                                                                                       | mirL    | 22  | 1513   |
| -----ATCAAAGTGGAGGCCCTCTCTTG-----                                                                                      | mirL    | 23  | 1299   |
| -----CCATCAAAGTGGAGGCCCTCTC-----                                                                                       | mirL    | 22  | 720    |
| -----ATCAAAGTGGAGGCCCTCTCT-----                                                                                        | mirL    | 21  | 580    |
| -----CCATCAAAGTGGAGGCCCTCT-----                                                                                        | mirL    | 21  | 569    |
| -----CCATCAAAGTGGAGGCCCTCTCTT-----                                                                                     | mirL    | 24  | 556    |
| -----CCATCAAAGTGGAGGCCCTCTCTTG-----                                                                                    | mirL    | 25  | 405    |

```

-----ATCAAAGTGGAGGCCCTCTCTTGA----- mirL 24 190
-----CCATCAAAGTGGAGGCCCTC----- mirL 20 176
-----CCATCAAAGTGGAGGCCCTCTCTTGA----- mirL 26 174
-----ATCAAAGTGGAGGCCCTCTCTTGA----- mirL 25 116
-----TCAAAGTGGAGGCCCTCTCT----- mirL 20 98
-----TCAAAGTGGAGGCCCTCTCTT----- mirL 22 50
-----TCAAAGTGGAGGCCCTCTCTT----- mirL 21 42
-----TCAAAGTGGAGGCCCTCTCTTGA----- mirL 23 27
-----CAAAGTGGAGGCCCTCTCT----- mirL 19 23
-----CAAAGTGGAGGCCCTCTCTT----- mirL 21 18
-----GCCATCAAAGTGGAGGCCCTCTCT----- mirL 24 17
-----ATCAAAGTGGAGGCCCTCTCTTGA----- mirL 26 14
-----CAAAGTGGAGGCCCTCTCTT----- mirL 20 11
-----GCCATCAAAGTGGAGGCCCTCTCT----- mirL 25 6
-----TCAAAGTGGAGGCCCTCTCTTGA----- mirL 24 6
-----ATCAAAGTGGAGGCCCTCTCTTGA----- mirL 27 4
-----GGCCATCAAAGTGGAGGCCCTCTCT----- mirL 25 3
-----CAAAGTGGAGGCCCTCTCTTGA----- mirL 22 3
-----GCCATCAAAGTGGAGGCCCTCTC----- mirL 23 2
-----CAAAGTGGAGGCCCTCTCTTGA----- mirL 23 2
-----GGCCATCAAAGTGGAGGCC----- mirL 18 1
-----GCCATCAAAGTGGAGGCCCTCT----- mirL 22 1
-----GCCATCAAAGTGGAGGCCCT----- mirL 20 1
-----GCCATCAAAGTGGAGGCCCTCTCTT----- mirL 26 1
-----AAAGTGCTTCCACTTTGTGTGC----- mirR 22 35511
-----AAGTGCTTCCACTTTGTGTGC----- mirR 21 14513
-----AAAGTGCTTCCACTTTGTGTGCC----- mirR 23 13032
-----AAGTGCTTCCACTTTGTGTGCC----- mirR 22 4583
-----AAAGTGCTTCCACTTTGTGTG----- mirR 21 4229
-----AAAGTGCTTCCACTTTGTGTGCCA----- mirR 24 3157
-----GAAAGTGCTTCCACTTTGTGTGC----- mirR 23 2800
-----AAGTGCTTCCACTTTGTGTGCCA----- mirR 23 2405
-----AAAGTGCTTCCACTTTGTGT----- mirR 20 1035
-----AAAGTGCTTCCACTTTGTGTGCCAC----- mirR 25 987
-----GAAAGTGCTTCCACTTTGTGT----- mirR 21 798
-----AAGTGCTTCCACTTTGTGTGCCAC----- mirR 24 786
-----AAGTGCTTCCACTTTGTGTG----- mirR 20 611
-----AAGTGCTTCCACTTTGTGTGCCACT----- mirR 25 433
-----AAAGTGCTTCCACTTTGTG----- mirR 19 401
-----GAAAGTGCTTCCACTTTGTGTGCC----- mirR 24 363
-----AGTGCTTCCACTTTGTGTGC----- mirR 20 285
-----GAAAGTGCTTCCACTTTGTGTG----- mirR 22 223
-----AAGTGCTTCCACTTTGTGT----- mirR 19 174
-----AGTGCTTCCACTTTGTGTGCC----- mirR 21 163
-----GTGCTTCCACTTTGTGTGCC----- mirR 20 115
-----GTGCTTCCACTTTGTGTGC----- mirR 19 96

```

```

-----GAAAGTGCTTCCACTTTGTGTGCCA----- mirR 25 65
-----GAAAGTGCTTCCACTTTGT----- mirR 19 53
-----GAAAGTGCTTCCACTTTGTG----- mirR 20 25
-----AGTGCTTCCACTTTGTGTGCCA----- mirR 22 24
-----AGTGCTTCCACTTTGTGTG----- mirR 19 8
-----AGAAAGTGCTTCCACTTTGTGTG----- mirR 23 7
-----AGTGCTTCCACTTTGTGTGCCAC----- mirR 23 5
-----GTGCTTCCACTTTGTGTGCCA----- mirR 21 5
-----AGTGCTTCCACTTTGTGT----- mirR 18 4
-----AGAAAGTGCTTCCACTTTGTGTG----- mirR 24 2
-----GTGCTTCCACTTTGTGTGCCAC----- mirR 22 2
-----GAGAAAGTGCTTCCACTT----- mirR 18 2
-----GAGAAAGTGCTTCCACTTTGTGTG----- mirR 25 1
-----GTGCTTCCACTTTGTGTG----- mirR 18 1
-----CACTGCATGGGGAAAACATCA----- morR 21 438
-----CACTGCATGGGGAAAACATC----- morR 20 53
-----CACTGCATGGGGAAAACATCATAGCTTTGCATC morR 33 50
-----CACTGCATGGGGAAAACATCAT----- morR 22 33
-----CACTGCATGGGGAAAACATCATAGCTTTG---- morR 29 21
-----CACTGCATGGGGAAAACATCATAG----- morR 24 15
-----ACTGCATGGGGAAAACATCA----- morR 20 12
-----CACTGCATGGGGAAAACATCATAGCTT----- morR 27 6
-----ACTGCATGGGGAAAACATCATAGCT----- morR 25 5
-----TGCCACTGCATGGGGAAA----- morR 18 3
-----ACTGCATGGGGAAAACATCATAGCTTTGCATC morR 32 1
-----ACTGCATGGGGAAAACATCATAGCTTTG---- morR 28 1
-----CCACTGCATGGGGAAAAC----- morR 18 1

```

>mmu-let-7g

```

CTCCGTTCTCTTTTGCCTGATTCCAGGCTGAGGTAGTAGTTTGTACAGTTTGTAGGGTCTATGATACCACCCGGTACAGGAGATAACTGTACAGGCCACTGCCTTGCAGGAACAGTGCACCAGCTACCA species le
CTCCGTTCTCTTTTGCCTGATTCCAGGC----- morL 28 3
-----CTTTTGCCTGATTCCAGGC----- morL 19 1
-----TTTTGCCTGATTCCAGGC----- morL 18 1
-----TGAGGTAGTAGTTTGTACAGTT----- mirL 22 370
-----TGAGGTAGTAGTTTGTACAGTT----- mirL 23 699
-----TGAGGTAGTAGTTTGTACAGT----- mirL 21 353
-----TGAGGTAGTAGTTTGTACAGTTTG----- mirL 24 101
-----TGAGGTAGTAGTTTGTACAG----- mirL 20 581
-----GAGGTAGTAGTTTGTACAGTT----- mirL 21 442
-----CTGAGGTAGTAGTTTGTACAGTT----- mirL 23 273
-----GAGGTAGTAGTTTGTACAGTTT----- mirL 22 110
-----TGAGGTAGTAGTTTGTACAGTTTGA----- mirL 25 104
-----TGAGGTAGTAGTTTGTACA----- mirL 19 703
-----GAGGTAGTAGTTTGTACAGT----- mirL 20 404
-----CTGAGGTAGTAGTTTGTACAGT----- mirL 22 318
-----CTGAGGTAGTAGTTTGTACAGTT----- mirL 24 279

```

```

-----GAGGTAGTAGTTTGTACAG----- mirL 19 254
-----GAGGTAGTAGTTTGTACAGTTTG----- mirL 23 233
-----AGGTAGTAGTTTGTACAGTT----- mirL 20 66
-----CTGAGGTAGTAGTTTGTACAGTTTG----- mirL 25 63
-----CTGAGGTAGTAGTTTGTACAG----- mirL 21 60
-----GGTAGTAGTTTGTACAGTT----- mirL 19 48
-----GAGGTAGTAGTTTGTACA----- mirL 18 34
-----GAGGTAGTAGTTTGTACAGTTTGA----- mirL 24 14
-----GGTAGTAGTTTGTACAGTTT----- mirL 20 11
-----CTGAGGTAGTAGTTTGTACA----- mirL 20 8
-----AGGTAGTAGTTTGTACAGTTT----- mirL 21 6
-----AGGTAGTAGTTTGTACAGT----- mirL 19 5
-----AGGTAGTAGTTTGTACAGTTTG----- mirL 22 5
-----AGGTAGTAGTTTGTACAG----- mirL 18 4
-----GCTGAGGTAGTAGTTTGTACAGT----- mirL 23 3
-----GGTAGTAGTTTGTACAGTTTGA----- mirL 22 3
-----GCTGAGGTAGTAGTTTGTACAG----- mirL 22 2
-----GGTAGTAGTTTGTACAGTTTG----- mirL 21 2
-----GCTGAGGTAGTAGTTTGTACAGTT----- mirL 24 1
-----CTGAGGTAGTAGTTTGTACAGTTTGA----- mirL 26 1
-----GGTAGTAGTTTGTACAGT----- mirL 18 1
-----GGCTGAGGTAGTAGTTTGTACAGTTTGA----- mirL 28 1
-----TGAGGGTCTATGATACCACCCGGTACAGGAGAT----- loop 33 3
-----TGAGGGTCTATGATACCACCCGGTACAGGAGA----- loop 32 2
-----TGAGGGTCTATGATACCACCCGGTACAGGAGATAA----- loop 35 2
-----GAGGGTCTATGATACCACCCGGTACAGGAGATAAC----- loop 35 2
-----AGGGTCTATGATACCACCCGGTACAGGAGATAAC----- loop 34 1
-----CTGTACAGGCCACTGCCTTGCC----- mirR 22 926
-----CTGTACAGGCCACTGCCTTGC----- mirR 21 501
-----ACTGTACAGGCCACTGCCTTGC----- mirR 22 240
-----CTGTACAGGCCACTGCCTTGCCA----- mirR 23 184
-----CTGTACAGGCCACTGCCTTGCCAG----- mirR 24 158
-----CTGTACAGGCCACTGCCTTGCCAGG----- mirR 25 128
-----CTGTACAGGCCACTGCCTTGCCAGGA----- mirR 26 60
-----CTGTACAGGCCACTGCCTTG----- mirR 20 31
-----ACTGTACAGGCCACTGCCTTG----- mirR 21 14
-----ACTGTACAGGCCACTGCCTTGCC----- mirR 23 13
-----TGTACAGGCCACTGCCTTGCCAG----- mirR 23 8
-----ACTGTACAGGCCACTGCCTT----- mirR 20 7
-----AACTGTACAGGCCACTGCCTTGC----- mirR 23 6
-----TGTACAGGCCACTGCCTTGCCA----- mirR 22 5
-----AACTGTACAGGCCACTGCCTTG----- mirR 22 4
-----TACAGGCCACTGCCTTGC----- mirR 18 3
-----TGTACAGGCCACTGCCTTGC----- mirR 20 2
-----TAACTGTACAGGCCACTG----- mirR 18 1
-----ACTGTACAGGCCACTGCCT----- mirR 19 1

```

```

-----ACTGTACAGGCCACTGCC----- mirR 18 1
-----AACTGTACAGGCCACTGC----- mirR 18 1
-----TGTACAGGCCACTGCCTTGCCAGG----- mirR 24 1
-----GTACAGGCCACTGCCTTGC----- mirR 19 1
-----ACTGTACAGGCCACTGCCTTGCCAG----- mirR 25 1
-----TGTACAGGCCACTGCCTTG----- mirR 19 1
-----GCCAGGAACAGTGCACCA----- morR 18 13
-----CAGGAACAGTGCACCAGTACC----- morR 22 11
-----CCAGGAACAGTGCACCAG----- morR 18 11
-----CAGGAACAGTGCACCAGC----- morR 18 2
-----GGAACAGTGCACCAGCTAC-- morR 19 1
-----GGAACAGTGCACCAGCTA-- morR 18 1
-----CCAGGAACAGTGCACCAGCTA-- morR 21 1
-----CAGGAACAGTGCACCAGCTACCA morR 23 1
-----AGGAACAGTGCACCAGCT--- morR 18 1
-----GAACAGTGCACCAGCTAC-- morR 18 1
-----CAGGAACAGTGCACCAGCT--- morR 19 1

```

>mmu-mir-221

| Species | len | reads |
|---------|-----|-------|
| morL    | 23  | 62    |
| morL    | 25  | 27    |
| morL    | 24  | 11    |
| morL    | 35  | 9     |
| morL    | 28  | 7     |
| morL    | 34  | 2     |
| morL    | 22  | 2     |
| morL    | 27  | 1     |
| morL    | 22  | 1     |
| morL    | 25  | 1     |
| morL    | 18  | 1     |
| morL    | 21  | 1     |
| morL    | 18  | 1     |
| mirL    | 26  | 4059  |
| mirL    | 24  | 644   |
| mirL    | 22  | 483   |
| mirL    | 23  | 481   |
| mirL    | 25  | 423   |
| mirL    | 21  | 317   |
| mirL    | 27  | 232   |
| mirL    | 27  | 79    |
| mirL    | 25  | 67    |
| mirL    | 23  | 29    |
| mirL    | 24  | 21    |
| mirL    | 26  | 10    |
| mirL    | 24  | 8     |

```
-----TGGCATAACAATGTAGATTTCTGT----- mirL 23 7
-----AACCTGGCATAACAATGTAGAT----- mirL 21 6
-----CCTGGCATAACAATGTAGATTTCTGT----- mirL 25 5
-----AACCTGGCATAACAATGTAGATT----- mirL 22 4
-----CTGGCATAACAATGTAGATTTTC----- mirL 21 1
-----TGAACCTGGCATAACAATG----- mirL 18 1
-----TGTTTGTTAGGCAACAGC----- loop 18 66
-----TGTGTTTGTTAGGCAACAGC----- loop 20 1
-----AGCTACATTGTCTGCTGGGTTTC----- mirR 23 240952
-----AGCTACATTGTCTGCTGGGTTT----- mirR 22 100496
-----AGCTACATTGTCTGCTGGGTTTCA----- mirR 24 75778
-----AGCTACATTGTCTGCTGGGTTTCAG----- mirR 25 8288
-----AGCTACATTGTCTGCTGGGTT----- mirR 21 7580
-----AGCTACATTGTCTGCTGGGTTTCAGG----- mirR 26 4106
-----AGCTACATTGTCTGCTGGGT----- mirR 20 2205
-----GCTACATTGTCTGCTGGGTTTC----- mirR 22 234
-----GCTACATTGTCTGCTGGGTTT----- mirR 21 170
-----TACATTGTCTGCTGGGTTTC----- mirR 20 83
-----GCTACATTGTCTGCTGGGTTTCA----- mirR 23 77
-----CAGCTACATTGTCTGCTGGGTTTC----- mirR 24 53
-----CTACATTGTCTGCTGGGTTT----- mirR 20 30
-----TACATTGTCTGCTGGGTTT----- mirR 19 30
-----CAGCTACATTGTCTGCTGGGTTT----- mirR 23 30
-----TACATTGTCTGCTGGGTTTCA----- mirR 21 28
-----CTACATTGTCTGCTGGGTTTC----- mirR 21 25
-----CAGCTACATTGTCTGCTGGGTTTCA----- mirR 25 16
-----CTACATTGTCTGCTGGGTTTCA----- mirR 22 8
-----GCTACATTGTCTGCTGGGTTTCAGG----- mirR 26 6
-----GCTACATTGTCTGCTGGGT----- mirR 19 6
-----GCTACATTGTCTGCTGGGTTTCAG----- mirR 24 5
-----TACATTGTCTGCTGGGTTTCAG----- mirR 22 5
-----ACAGCTACATTGTCTGCTGGGTTT----- mirR 24 4
-----GCTACATTGTCTGCTGGGTT----- mirR 20 4
-----ACAGCTACATTGTCTGCTGGGTTTC----- mirR 25 4
-----TACATTGTCTGCTGGGTT----- mirR 18 3
-----CTACATTGTCTGCTGGGTT----- mirR 19 2
-----ACAGCTACATTGTCTGCT----- mirR 18 2
-----ACAGCTACATTGTCTGCTGGGTTTCA----- mirR 26 1
-----AACAGCTACATTGTCTGC----- mirR 18 1
-----CAGCTACATTGTCTGCTGGGTT----- mirR 22 1
-----CAGCTACATTGTCTGCTGGG----- mirR 20 1
-----ACAGCTACATTGTCTGCTGGGT----- mirR 22 1
-----GCTACCTGGAATCATTTCCTTC morR 21 1
```

>mmu-mir-18a

GC GGGGAGGGCCTGCTGGTGTGCTGCTGCTTTTGTCTAAGGTGCATCTAGTGCAGATAGTGAAGTAGACTAGCATCTACTGCCCTAAGTGCTCCTTCTGGCATAAGAAGTTATGTCCTCATCCAATCCAAGTCAAG spe

```
-----GTGCTGCGTGCTTTTTGTTCT----- mor
-----TGCTGCGTGCTTTTTGTTCT----- mor
-----CTGCTGGTGCTGCGTGCTTTTTGTTCT----- mor
-----GTGCTGCGTGCTTTTTGTTCT----- mor
-CGGGGAGGGCCTGCTGGTGCTGCGTGCTTTTTGT----- mor
---GGAGGGCCTGCTGGTGCTGCGTGCTTTTTGTTCT----- mor
---GGAGGGCCTGCTGGTGCTGCGTGCTTTTTG----- mor
-----GTGCTGCGTGCTTTTTGTT----- mor
-----GGTGCTGCGTGCTTTTTGTT----- mor
-----CTGCTGGTGCTGCGTGCTTTTTGTT----- mor
---GGGAGGGCCTGCTGGTGCTGCGTGCTTTTTGTTCT----- mor
-----GGTGCTGCGTGCTTTTTGTTCT----- mor
-----GCTGCGTGCTTTTTGTTCT----- mor
-----CTGCGTGCTTTTTGTTCTA----- mor
-----GTGCTGCGTGCTTTTTGT----- mor
GCGGGGAGGGCCTGCTGGTGCTGCGTGCTTTTTG----- mor
-----GTGCTGCGTGCTTTTTGTTCTA----- mor
-----GCGTGCTTTTTGTTCTAA----- mor
-----CTGCGTGCTTTTTGTTCT----- mor
-CGGGGAGGGCCTGCTGGTGCTGCGTGCTTTTTGTT----- mor
-----GGTGCTGCGTGCTTTTTGTTCT----- mor
GCGGGGAGGGCCTGCTGGTGCTGCGTGCTTTTTGT----- mor
-----GCTGCGTGCTTTTTGTTCTA----- mor
-----TAAGGTGCATCTAGTGCAGATAG----- mir
-----TAAGGTGCATCTAGTGCAGATA----- mir
-----TAAGGTGCATCTAGTGCAGATAGT----- mir
-----TAAGGTGCATCTAGTGCAGAT----- mir
-----AAGGTGCATCTAGTGCAGATAG----- mir
-----TAAGGTGCATCTAGTGCAGAG----- mir
-----AAGGTGCATCTAGTGCAGAT----- mir
-----AAGGTGCATCTAGTGCAGATAGT----- mir
-----AAGGTGCATCTAGTGCAGATA----- mir
-----TAAGGTGCATCTAGTGCAG----- mir
-----TAAGGTGCATCTAGTGCAGATAGT----- mir
-----AAGGTGCATCTAGTGCAGAG----- mir
-----AAGGTGCATCTAGTGCAG----- mir
-----AGGTGCATCTAGTGCAGATAG----- mir
-----AAGGTGCATCTAGTGCAGATAGT----- mir
-----CTAAGGTGCATCTAGTGCAGATAG----- mir
-----GGTGCATCTAGTGCAGATA----- mir
-----GGTGCATCTAGTGCAGATAG----- mir
-----AGGTGCATCTAGTGCAGATAGT----- mir
-----AGGTGCATCTAGTGCAGATA----- mir
-----AGGTGCATCTAGTGCAGAT----- mir
-----CTAAGGTGCATCTAGTGCAGATA----- mir
-----AGGTGCATCTAGTGCAGAG----- mir
```

```
-----CTAAGGTGCATCTAGTGCAGA----- mir
-----CTAAGGTGCATCTAGTGCAGATAGT----- mir
-----AGGTGCATCTAGTGCAGATAGTG----- mir
-----TCTAAGGTGCATCTAGTGCAGATAG----- mir
-----GGTGCATCTAGTGCAGAT----- mir
-----GGTGCATCTAGTGCAGATAGT----- mir
-----TTCTAAGGTGCATCTAGTGCAGAT----- mir
-----CTAAGGTGCATCTAGTGCAGAT----- mir
-----AGGTGCATCTAGTGCAGATAGTGA----- mir
-----TTCTAAGGTGCATCTAGTGCAGA----- mir
-----GGTGCATCTAGTGCAGATAGTG----- mir
-----TGAAGTAGACTAGCATCT----- loo
-----TGAAGTAGACTAGCATCTA----- loo
-----TGAAGTAGACTAGCATCTACT----- loo
-----ACTGCCCTAAGTGCTCCTTCT----- mir
-----ACTGCCCTAAGTGCTCCTTCTGG----- mir
-----ACTGCCCTAAGTGCTCCTTCTG----- mir
-----ACTGCCCTAAGTGCTCCTTCTGGC----- mir
-----ACTGCCCTAAGTGCTCCTTCTGGCA----- mir
-----ACTGCCCTAAGTGCTCCTTCTGCA----- mir
-----ACTGCCCTAAGTGCTCCTTCTGGCAT----- mir
-----CTGCCCTAAGTGCTCCTTCTGGC----- mir
-----CTGCCCTAAGTGCTCCTTCTG----- mir
-----CTGCCCTAAGTGCTCCTTCTG----- mir
-----TACTGCCCTAAGTGCTCCTTCT----- mir
-----CTGCCCTAAGTGCTCCTTCTG----- mir
-----CTGCCCTAAGTGCTCCTTCTGGCA----- mir
-----TGCCCTAAGTGCTCCTTCT----- mir
-----TACTGCCCTAAGTGCTCCTTCTGG----- mir
-----TACTGCCCTAAGTGCTCCTTCTG----- mir
-----TACTGCCCTAAGTGCTCCTTCT----- mir
-----CTACTGCCCTAAGTGCTCCTTCT----- mir
-----GCCCTAAGTGCTCCTTCT----- mir
-----GCCCTAAGTGCTCCTTCTG----- mir
-----TGCCCTAAGTGCTCCTTCT----- mir
-----CTGCCCTAAGTGCTCCTTCT----- mir
-----TACTGCCCTAAGTGCTCCTTCTGGC----- mir
-----TGCCCTAAGTGCTCCTTCTGGC----- mir
-----TCTACTGCCCTAAGTGCTCCTTCT----- mir
-----TCTACTGCCCTAAGTGCTCCTTCTG----- mir
-----CTACTGCCCTAAGTGCTCCTTCT----- mir
-----CTGCCCTAAGTGCTCCTTCTGGCAT----- mir
-----TCTACTGCCCTAAGTGCTCCTT----- mir
-----TCTACTGCCCTAAGTGCTCCTTCT----- mir
-----TGCCCTAAGTGCTCCTTCTG----- mir
-----TGCCCTAAGTGCTCCTTCTGGCAT----- mir
```



```

-----TCTACTGCCCTAAGTGCTCCTTCTGG----- mir
-----GCCCTAAGTGCTCCTTCTGG----- mir
-----CTACTGCCCTAAGTGCTCCTT----- mir
-----TACTGCCCTAAGTGCTCCTT----- mir
-----TGCCCTAAGTGCTCCTTCTGGCA----- mir
-----ATAAGAAGTTATGTCCTCATCCAATCCAAGTCAAG mor
-----ATAAGAAGTTATGTCCTC----- mor
-----ATAAGAAGTTATGTCCTCATCCAATCCAAG----- mor
-----TGGCATAAGAAGTTATGTC----- mor
-----ATAAGAAGTTATGTCCTCAT----- mor
-----ATAAGAAGTTATGTCCTCATCCAATC----- mor
-----ATAAGAAGTTATGTCCTCATCCAATCCAAGTC----- mor
-----ATAAGAAGTTATGTCCTCATCCAAT----- mor
-----TGGCATAAGAAGTTATGT----- mor

```

>mmu-mir-99b

| Species | len | reads  |
|---------|-----|--------|
| morL    | 18  | 58     |
| morL    | 18  | 36     |
| morL    | 19  | 1      |
| morL    | 22  | 1      |
| morL    | 20  | 1      |
| morL    | 20  | 1      |
| morL    | 19  | 1      |
| morL    | 19  | 1      |
| morL    | 21  | 1      |
| mirL    | 22  | 192362 |
| mirL    | 23  | 70385  |
| mirL    | 21  | 48870  |
| mirL    | 20  | 41560  |
| mirL    | 24  | 6046   |
| mirL    | 18  | 2446   |
| mirL    | 19  | 2109   |
| mirL    | 21  | 1244   |
| mirL    | 22  | 546    |
| mirL    | 20  | 380    |
| mirL    | 19  | 194    |
| mirL    | 20  | 49     |
| mirL    | 23  | 46     |
| mirL    | 22  | 46     |
| mirL    | 23  | 38     |
| mirL    | 18  | 31     |
| mirL    | 24  | 28     |
| mirL    | 19  | 19     |
| mirL    | 21  | 15     |
| mirL    | 19  | 14     |

```

-----CCCGTAGAACCGACCTTGCGGG----- mirL 23 12
-----CCACCCGTAGAACCGACCTTGCGG----- mirL 24 10
-----CCGTAGAACCGACCTTGC----- mirL 18 9
-----CCCGTAGAACCGACCTTG----- mirL 18 8
-----CCACCCGTAGAACCGACCTTG----- mirL 21 6
-----CCACCCGTAGAACCGACCT----- mirL 19 4
-----CCCGTAGAACCGACCTTGCGGG----- mirL 22 2
-----CCGTAGAACCGACCTTGCGG----- mirL 20 2
-----CCACCCGTAGAACCGACCTT----- mirL 20 1
-----ACCCACCCGTAGAACCGACCTT----- mirL 22 1
-----CCACCCGTAGAACCGACC----- mirL 18 1
-----CCCACCCGTAGAACCGACCTTGC----- mirL 23 1
-----ACCCACCCGTAGAACCGACC----- mirL 20 1
-----CCCACCCGTAGAACCGACC----- mirL 19 1
-----ACCCACCCGTAGAACCGACC----- mirL 19 1
-----GGGCCTTCGCCGCACACA----- loop 18 3
-----GCGGGGCCTTCGCCGCAC----- loop 18 1
-----GCGGGGCCTTCGCCGCACA----- loop 19 1
-----CAAGCTCGTGTCTGTGGGTCCGT----- mirR 23 19582
-----CAAGCTCGTGTCTGTGGGTCCG----- mirR 22 14294
-----CAAGCTCGTGTCTGTGGGTCCGTG----- mirR 24 8680
-----CAAGCTCGTGTCTGTGGGTCCGTGT----- mirR 25 6774
-----CAAGCTCGTGTCTGTGGGTCC----- mirR 21 3541
-----CAAGCTCGTGTCTGTGGGTCC----- mirR 20 2031
-----CAAGCTCGTGTCTGTGGGTCCGTGTC----- mirR 26 677
-----AGCTCGTGTCTGTGGGTCCG----- mirR 20 160
-----AAGCTCGTGTCTGTGGGTCCGT----- mirR 22 109
-----AAGCTCGTGTCTGTGGGTCCG----- mirR 21 90
-----AAGCTCGTGTCTGTGGGTCCGTG----- mirR 23 74
-----AAGCTCGTGTCTGTGGGTCCGTGT----- mirR 24 55
-----AAGCTCGTGTCTGTGGGTCC----- mirR 20 35
-----ACAAGCTCGTGTCTGTGGGTCCGT----- mirR 24 24
-----AGCTCGTGTCTGTGGGTCCGT----- mirR 21 21
-----AAGCTCGTGTCTGTGGGTCC----- mirR 19 16
-----AAGCTCGTGTCTGTGGGTCCGTGTC----- mirR 25 15
-----GCTCGTGTCTGTGGGTCCG----- mirR 19 13
-----ACAAGCTCGTGTCTGTGGGTCC----- mirR 22 11
-----AGCTCGTGTCTGTGGGTCC----- mirR 19 11
-----ACAAGCTCGTGTCTGTGGGT----- mirR 20 6
-----AGCTCGTGTCTGTGGGTCCGTGT----- mirR 23 6
-----AGCTCGTGTCTGTGGGTCC----- mirR 18 6
-----GCTCGTGTCTGTGGGTCC----- mirR 18 4
-----ACAAGCTCGTGTCTGTGGGTCCG----- mirR 23 4
-----ACAAGCTCGTGTCTGTGGGTCC----- mirR 21 3
-----ACAAGCTCGTGTCTGTGGGTCCGTG----- mirR 25 2
-----GCTCGTGTCTGTGGGTCCGTGT----- mirR 22 2

```

```

-----GCTCGTGTCTGTGGGTCCGTG----- mirR 21 1
-----ACAAGCTCGTGTCTGTGGG----- mirR 19 1
-----GCTCGTGTCTGTGGGTCCGTGTCG----- mirR 24 1
-----CGGGGGCTCACCATCGCG----- morR 18 2
-----GTCGGGGGCTCACCATCG----- morR 18 1
-----TCGGGGGCTCACCATCGC----- morR 18 1
-----TGTCGGGGGCTCACCATCGGGCTGGGACCTCCC morR 34 1

```

>mmu-mir-210

| Species | len | reads |
|---------|-----|-------|
| morL    | 19  | 19    |
| morL    | 20  | 18    |
| morL    | 20  | 6     |
| morL    | 18  | 2     |
| morL    | 21  | 1     |
| morL    | 22  | 1     |
| morL    | 18  | 1     |
| mirL    | 22  | 30985 |
| mirL    | 23  | 8562  |
| mirL    | 21  | 4080  |
| mirL    | 21  | 841   |
| mirL    | 20  | 795   |
| mirL    | 22  | 700   |
| mirL    | 24  | 586   |
| mirL    | 19  | 128   |
| mirL    | 25  | 118   |
| mirL    | 23  | 111   |
| mirL    | 20  | 70    |
| mirL    | 23  | 64    |
| mirL    | 22  | 34    |
| mirL    | 24  | 22    |
| mirL    | 24  | 19    |
| mirL    | 21  | 16    |
| mirL    | 19  | 14    |
| mirL    | 18  | 7     |
| mirL    | 24  | 4     |
| mirL    | 21  | 3     |
| mirL    | 18  | 3     |
| mirL    | 20  | 3     |
| mirL    | 18  | 2     |
| mirL    | 20  | 2     |
| mirL    | 19  | 2     |
| mirL    | 23  | 1     |
| mirL    | 18  | 1     |
| mirL    | 22  | 1     |
| loop    | 18  | 2     |

```

-----CTGCGTTGCTCCGGACCCAC----- loop 20 1
-----CTGCGTTGCTCCGGACCC----- loop 18 1
-----CTGTGCGTGTGACAGCGGCTGA----- mirR 22 280124
-----CTGTGCGTGTGACAGCGGCTGAT----- mirR 23 40264
-----CTGTGCGTGTGACAGCGGCTGATC----- mirR 24 25450
-----ACTGTGCGTGTGACAGCGGCTGA----- mirR 23 9525
-----CTGTGCGTGTGACAGCGGCTG----- mirR 21 5476
-----CTGTGCGTGTGACAGCGGCT----- mirR 20 3685
-----ACTGTGCGTGTGACAGCGGCTGAT----- mirR 24 2267
-----ACTGTGCGTGTGACAGCGGCTGATC----- mirR 25 1690
-----CTGTGCGTGTGACAGCGGCTGATCT----- mirR 25 1432
-----CTGTGCGTGTGACAGCGGC----- mirR 19 1380
-----ACTGTGCGTGTGACAGCGGCTG----- mirR 22 926
-----ACTGTGCGTGTGACAGCGGCT----- mirR 21 866
-----TGTGCGTGTGACAGCGGCTGA----- mirR 21 259
-----ACTGTGCGTGTGACAGCGGC----- mirR 20 125
-----ACTGTGCGTGTGACAGCGGCTGATCT----- mirR 26 124
-----TGTGCGTGTGACAGCGGCTGAT----- mirR 22 91
-----GTGCGTGTGACAGCGGCTGA----- mirR 20 42
-----TGTGCGTGTGACAGCGGCTGATC----- mirR 23 34
-----TGCGTGTGACAGCGGCTGATC----- mirR 21 17
-----TGGTGTGACAGCGGCTGA----- mirR 19 14
-----GTGCGTGTGACAGCGGCTGAT----- mirR 21 12
-----TGTGCGTGTGACAGCGGCTG----- mirR 20 12
-----GTGCGTGTGACAGCGGCTG----- mirR 19 9
-----GTGCGTGTGACAGCGGCTGATC----- mirR 22 7
-----TGTGCGTGTGACAGCGGCT----- mirR 19 7
-----TGTGCGTGTGACAGCGGCTGATCT----- mirR 24 3
-----GTGCGTGTGACAGCGGCT----- mirR 18 2
-----TGGTGTGACAGCGGCTG----- mirR 18 2
-----CACTGTGCGTGTGACAGCGGCTG----- mirR 23 2
-----CACTGTGCGTGTGACAGCGGCTGAT----- mirR 25 2
-----CACTGTGCGTGTGACAGCGGCTGA----- mirR 24 1
-----CCACTGTGCGTGTGACAGC----- mirR 19 1
-----TGGTGTGACAGCGGCTGATCT----- mirR 22 1
-----TGTGCGTGTGACAGCGGC----- mirR 18 1
-----CACTGTGCGTGTGACAGCGGCT----- mirR 22 1
-----CCACTGTGCGTGTGACAG----- mirR 18 1
-----TGGTGTGACAGCGGCTGAT----- mirR 20 1
-----CCACTGTGCGTGTGACAGCGGCTGA----- mirR 25 1
-----CACTGTGCGTGTGACAGCGGC----- mirR 21 1
-----TCTGTCCCTGGGCAGCGCGAACCCTGGCCCT-- morR 32 6
-----GTCCCTGGGCAGCGCGAA----- morR 18 6
-----TCTGTCCCTGGGCAGCGCGAACCCTGGCCC-- morR 31 5
-----TCTGTCCCTGGGCAGCGCGAACCCTG-- morR 27 4
-----GTCCCTGGGCAGCGCGAAC----- morR 19 4

```

```

-----TCTGTCCCTGGGCAGCGCGAACCCTGG----- morR 28 3
-----TCTGTCCCTGGGCAGCGCGAACCCT----- morR 26 2
-----TCTGTCCCTGGGCAGCGCGAA----- morR 21 2
-----TCTGTCCCTGGGCAGCGCGAACCCTGGCCCTGT morR 34 2
-----CTGTCCCTGGGCAGCGCGAACCCTGGCCC--- morR 30 1
-----GTCCCTGGGCAGCGCGAACC----- morR 20 1
-----TGATCTGTCCCTGGGCAG----- morR 18 1

```

>mmu-mir-218-2

| AGTTGCCGCGGGGCTTTCCTTGTGCTTGATCTAACCATGTGGTGGAAACGATGGAAACGGAACATGGTTCTGTCAAGCACCGCGGAAAGCATCGCTCTCTCCTGCAGCA | species | len | reads  |
|---------------------------------------------------------------------------------------------------------------|---------|-----|--------|
| -GTTGCCGCGGGGCTTTCCT-----                                                                                     | morL    | 19  | 3      |
| AGTTGCCGCGGGGCTTTCCT-----                                                                                     | morL    | 20  | 3      |
| --TTGCCGCGGGGCTTTCCT-----                                                                                     | morL    | 18  | 2      |
| -GTTGCCGCGGGGCTTTCCT-----                                                                                     | morL    | 20  | 1      |
| ----GCCGCGGGGCTTTCCTTT-----                                                                                   | morL    | 18  | 1      |
| -----TTGTGCTTGATCTAACCATGTG-----                                                                              | mirL    | 22  | 278626 |
| -----TTGTGCTTGATCTAACCATGT-----                                                                               | mirL    | 21  | 95496  |
| -----TTGTGCTTGATCTAACCATGTGG-----                                                                             | mirL    | 23  | 17602  |
| -----TTGTGCTTGATCTAACCATGTGGT-----                                                                            | mirL    | 24  | 10828  |
| -----TGTGCTTGATCTAACCATGTG-----                                                                               | mirL    | 21  | 3197   |
| -----TTGTGCTTGATCTAACCATG-----                                                                                | mirL    | 20  | 2149   |
| -----TGTGCTTGATCTAACCATGT-----                                                                                | mirL    | 20  | 1625   |
| -----TTGTGCTTGATCTAACCATGTGGTG-----                                                                           | mirL    | 25  | 1063   |
| -----TTGTGCTTGATCTAACCA-----                                                                                  | mirL    | 18  | 459    |
| -----TGTGCTTGATCTAACCATGTGG-----                                                                              | mirL    | 22  | 395    |
| -----TGTGCTTGATCTAACCATGTGGT-----                                                                             | mirL    | 23  | 193    |
| -----TGTGCTTGATCTAACCATG-----                                                                                 | mirL    | 19  | 84     |
| -----GTGCTTGATCTAACCATGTG-----                                                                                | mirL    | 20  | 74     |
| -----TGTGCTTGATCTAACCATGTGGTG-----                                                                            | mirL    | 24  | 50     |
| -----GTGCTTGATCTAACCATGT-----                                                                                 | mirL    | 19  | 33     |
| -----TGCTTGATCTAACCATGT-----                                                                                  | mirL    | 18  | 22     |
| -----TGCTTGATCTAACCATGTGGTG-----                                                                              | mirL    | 22  | 17     |
| -----TGTGCTTGATCTAACCAT-----                                                                                  | mirL    | 18  | 5      |
| -----CTTTGTGCTTGATCTAAC-----                                                                                  | mirL    | 18  | 4      |
| -----TTTGTGCTTGATCTAACCATGTG-----                                                                             | mirL    | 23  | 4      |
| -----GTGCTTGATCTAACCATGTGG-----                                                                               | mirL    | 21  | 4      |
| -----CTTTGTGCTTGATCTAACCATGTGG-----                                                                           | mirL    | 25  | 3      |
| -----TTTGTGCTTGATCTAAC-----                                                                                   | mirL    | 18  | 2      |
| -----TTTGTGCTTGATCTAACCATGTGGT-----                                                                           | mirL    | 25  | 2      |
| -----TGCTTGATCTAACCATGTG-----                                                                                 | mirL    | 19  | 2      |
| -----TTTGTGCTTGATCTAACCATGTGG-----                                                                            | mirL    | 24  | 1      |
| -----GGTGAACGATGGAAACGGAAC-----                                                                               | loop    | 22  | 142    |
| -----GGTGAACGATGGAAACGGAACA-----                                                                              | loop    | 23  | 50     |
| -----GTGGAACGATGGAAACGGAA-----                                                                                | loop    | 20  | 35     |
| -----GGTGAACGATGGAAACGGAACAT-----                                                                             | loop    | 24  | 5      |
| -----GTGGAACGATGGAAACGG-----                                                                                  | loop    | 18  | 3      |

```

-----GGTGAACGATGGAAACGGAA----- loop 21 2
-----GTGGAACGATGGAAACGGAACA----- loop 22 1
-----GTGGAACGATGGAAACGGAAC----- loop 21 1
-----TGGAACGATGGAAACGGAAC----- loop 20 1
-----CATGGTTCTGTCAAGCACCGCG----- mirR 22 906
-----CATGGTTCTGTCAAGCACCGCG----- mirR 23 66
-----CATGGTTCTGTCAAGCACCG----- mirR 20 56
-----ATGGTTCTGTCAAGCACCGCG----- mirR 21 42
-----CATGGTTCTGTCAAGCAC----- mirR 19 14
-----CATGGTTCTGTCAAGCACCGC----- mirR 21 13
-----ATGGTTCTGTCAAGCACCGCG----- mirR 22 7
-----CATGGTTCTGTCAAGCAC----- mirR 18 7
-----TGGTTCTGTCAAGCACCGCG----- mirR 20 6
-----CATGGTTCTGTCAAGCACCGGGA----- mirR 24 4
-----GAACATGGTTCTGTCAAGCAC----- mirR 22 2
-----ATGGTTCTGTCAAGCACCGGGA----- mirR 23 2
-----ATGGTTCTGTCAAGCAC----- mirR 18 1
-----AACATGGTTCTGTCAAGCAC----- mirR 20 1
-----GAACATGGTTCTGTCAAGCACCGCG----- mirR 26 1
-----ATGGTTCTGTCAAGCACCGC----- mirR 20 1
-----ATGGTTCTGTCAAGCACCG----- mirR 19 1
-----GCGGAAAGCATCGCTCTC----- morR 18 4
-----AGCATCGCTCTCTCCTGC----- morR 18 3
-----AGCATCGCTCTCTCCTGCAGCA morR 22 2
-----GAAAGCATCGCTCTCTCC----- morR 18 2
-----GCGGAAAGCATCGCTCTCT----- morR 19 1
-----AAAGCATCGCTCTCTCCTG----- morR 19 1
-----AAAGCATCGCTCTCTCCT----- morR 18 1
-----AAGCATCGCTCTCTCCTG----- morR 18 1

>mmu-mir-135b
ACCCCTCCGCTCTGCTGTGGCCTATGGCTTTTCATTCCTATGTGATTGCTGCTCCGAACATCATGTAGGGCTAAAAGCCATGGGCTACAGTGAGGGGCAAGCTCCTGCACAGCTACAC species len reads
--CCCTCCGCTCTGCTGTGGCC----- morL 20 31
--CCTCCGCTCTGCTGTGGCC----- morL 19 16
--CCCTCCGCTCTGCTGTGG----- morL 18 11
--CCCTCCGCTCTGCTGTGGCCT----- morL 21 5
--CCCTCCGCTCTGCTGTGGCCTA----- morL 22 4
--CCCCTCCGCTCTGCTGTGGCC----- morL 21 4
--CCCTCCGCTCTGCTGTGGC----- morL 19 3
--CCTCCGCTCTGCTGTGGC----- morL 18 3
--CCCCTCCGCTCTGCTGTGGCCT----- morL 22 2
--CCTCCGCTCTGCTGTGGCCT----- morL 20 2
ACCCCTCCGCTCTGCTGTGGCC----- morL 22 1
--CCCCTCCGCTCTGCTGTGGCCTA----- morL 23 1
----CTCCGCTCTGCTGTGGCC----- morL 18 1
----CTCCGCTCTGCTGTGGCCTA----- morL 20 1

```

```

-----TATGGCTTTTCATTCCCTATGTGA----- mirL 23 302722
-----TATGGCTTTTCATTCCCTATGT----- mirL 21 49200
-----TATGGCTTTTCATTCCCTATGTG----- mirL 22 44453
-----ATGGCTTTTCATTCCCTATGTGA----- mirL 22 2846
-----TATGGCTTTTCATTCCCTATG----- mirL 20 2425
-----ATGGCTTTTCATTCCCTATGT----- mirL 20 2089
-----TATGGCTTTTCATTCCCTATGTGAT----- mirL 24 2078
-----TATGGCTTTTCATTCCCTAT----- mirL 19 812
-----CTATGGCTTTTCATTCCCTATGTGA----- mirL 24 688
-----ATGGCTTTTCATTCCCTATGTG----- mirL 21 601
-----TATGGCTTTTCATTCCCTATGTGATT----- mirL 25 600
-----CCTATGGCTTTTCATTCCCTATG----- mirL 22 98
-----ATGGCTTTTCATTCCCTATGTGAT----- mirL 23 84
-----GGCTTTTCATTCCCTATGTGA----- mirL 20 78
-----ATGGCTTTTCATTCCCTATG----- mirL 19 77
-----CTATGGCTTTTCATTCCCTATGT----- mirL 22 76
-----ATGGCTTTTCATTCCCTATGTGATT----- mirL 24 57
-----CTATGGCTTTTCATTCCCTATGTG----- mirL 23 56
-----TGGCTTTTCATTCCCTATGTGA----- mirL 21 43
-----ATGGCTTTTCATTCCCTAT----- mirL 18 42
-----CCTATGGCTTTTCATTCCCTATGT----- mirL 23 38
-----TGGCTTTTCATTCCCTATG----- mirL 18 26
-----GGCTTTTCATTCCCTATGT----- mirL 18 22
-----CTATGGCTTTTCATTCCCTATGTGAT----- mirL 25 21
-----GGCTTTTCATTCCCTATGTG----- mirL 19 18
-----TGGCTTTTCATTCCCTATGT----- mirL 19 12
-----TGGCTTTTCATTCCCTATGTG----- mirL 20 12
-----CCTATGGCTTTTCATTCCCTATGTG----- mirL 24 11
-----TGGCTTTTCATTCCCTATGTGATT----- mirL 23 9
-----CTATGGCTTTTCATTCCCTATG----- mirL 21 6
-----CCTATGGCTTTTCATTCCCTAT----- mirL 21 2
-----GGCTTTTCATTCCCTATGTGATT----- mirL 22 2
-----CCTATGGCTTTTCATTCCCTATGTGAT----- mirL 26 2
-----CTATGGCTTTTCATTCCCTATGTGATTGC----- mirL 28 1
-----CTATGGCTTTTCATTCCCTATGTGATT----- mirL 26 1
-----CCTATGGCTTTTCATTCCCT----- mirL 19 1
-----TGGCTTTTCATTCCCTATGTGATTG----- mirL 24 1
-----CCTATGGCTTTTCATTCCCTATGTGA----- mirL 25 1
-----ATTGCTGCTCCGAACTCA----- loop 18 13
-----TGATTGCTGCTCCGAACTCATG----- loop 22 5
-----ATTGCTGCTCCGAACTCATG----- loop 20 4
-----GATTGCTGCTCCGAACTC----- loop 18 2
-----TTGCTGCTCCGAACTCAT----- loop 18 1
-----GATTGCTGCTCCGAACTCATG----- loop 21 1
-----TGATTGCTGCTCCGAACTC----- loop 19 1
-----TTGCTGCTCCGAACTCATG----- loop 19 1

```

```
-----TGCTGCTCCGAACATCATG----- loop 18 1
-----GATTGCTGCTCCGAACATCA----- loop 19 1
-----ATGTAGGGCTAAAAGCCATGGGC----- mirR 23 1469
-----TGTAGGGCTAAAAGCCATGGGC----- mirR 22 503
-----ATGTAGGGCTAAAAGCCATGGGC----- mirR 24 481
-----ATGTAGGGCTAAAAGCCATGGGC----- mirR 25 191
-----ATGTAGGGCTAAAAGCCATGGG----- mirR 22 165
-----TGTAGGGCTAAAAGCCATGGGC----- mirR 23 147
-----TAGGGCTAAAAGCCATGGGC----- mirR 21 72
-----TGTAGGGCTAAAAGCCATGGGC----- mirR 24 59
-----GTAGGGCTAAAAGCCATGGGC----- mirR 22 53
-----TAGGGCTAAAAGCCATGGGC----- mirR 22 38
-----GTAGGGCTAAAAGCCATGGGC----- mirR 21 38
-----ATGTAGGGCTAAAAGCCATGGGC----- mirR 26 37
-----TGTAGGGCTAAAAGCCATGGG----- mirR 21 33
-----ATGTAGGGCTAAAAGCCATGG----- mirR 21 26
-----TAGGGCTAAAAGCCATGGGC----- mirR 23 26
-----TAGGGCTAAAAGCCATGGG----- mirR 19 23
-----TGTAGGGCTAAAAGCCATGGGC----- mirR 25 23
-----TAGGGCTAAAAGCCATGGGC----- mirR 24 17
-----GTAGGGCTAAAAGCCATGGGC----- mirR 23 16
-----TAGGGCTAAAAGCCATGGGC----- mirR 20 14
-----ATGTAGGGCTAAAAGCCATGG----- mirR 20 14
-----GTAGGGCTAAAAGCCATGGGC----- mirR 24 14
-----TGTAGGGCTAAAAGCCATGGGC----- mirR 26 12
-----GTAGGGCTAAAAGCCATGGGC----- mirR 25 10
-----GTAGGGCTAAAAGCCATGGG----- mirR 20 8
-----TAGGGCTAAAAGCCATGGGC----- mirR 25 6
-----TGTAGGGCTAAAAGCCATGGGC----- mirR 27 5
-----CATGTAGGGCTAAAAGCCATGGGC----- mirR 24 2
-----GTAGGGCTAAAAGCCATGGGC----- mirR 26 2
-----TCATGTAGGGCTAAAAGCCATGGGC----- mirR 26 1
-----CATGTAGGGCTAAAAGCC----- mirR 18 1
-----CATGTAGGGCTAAAAGCCATGG----- mirR 22 1
-----CTACAGTGAGGGGCAAGC----- morR 18 13
-----CTACAGTGAGGGGCAAGCTCCTGCACAGCTACAC morR 34 4
-----AGTGAGGGGCAAGCTCCTGC----- morR 20 4
-----CTACAGTGAGGGGCAAGCTCCTG----- morR 23 3
-----CTACAGTGAGGGGCAAGCTCCT----- morR 22 3
-----CTACAGTGAGGGGCAAGCTCC----- morR 21 2
-----ACAGTGAGGGGCAAGCTC----- morR 18 2
-----CTACAGTGAGGGGCAAGCTCCTGCACAGCTAC-- morR 32 2
-----GCTACAGTGAGGGGCAAG----- morR 18 1
-----CTACAGTGAGGGGCAAGCTCCTGCACAGCT---- morR 30 1
```

>mmu-mir-19a



|                                                                                                                 | species | len | reads  |
|-----------------------------------------------------------------------------------------------------------------|---------|-----|--------|
| TGTGTTTGCAGCCCTCTGTTAGTTTTGCATAGTTGCACTACAAGAAGAATGTAGTTGTGCAAATCTATGCAAACTGATGGTGGCCTGCTATTTACTTCAAGTGTGTTTTTT | morL    | 19  | 29     |
| -GTGTTTGCAGCCCTCTGTT-----                                                                                       | morL    | 20  | 7      |
| -GTGTTTGCAGCCCTCTGTTA-----                                                                                      | morL    | 20  | 5      |
| TGTGTTTGCAGCCCTCTGTT-----                                                                                       | morL    | 21  | 5      |
| TGTGTTTGCAGCCCTCTGTTA-----                                                                                      | morL    | 19  | 3      |
| TGTGTTTGCAGCCCTCTGT-----                                                                                        | morL    | 19  | 2      |
| ---GTTTGCAGCCCTCTGTTAG-----                                                                                     | morL    | 18  | 2      |
| -GTGTTTGCAGCCCTCTGT-----                                                                                        | mirL    | 21  | 228    |
| -----AGTTTTGCATAGTTGCACTAC-----                                                                                 | mirL    | 20  | 196    |
| -----AGTTTTGCATAGTTGCACTA-----                                                                                  | mirL    | 20  | 141    |
| -----TAGTTTTGCATAGTTGCACT-----                                                                                  | mirL    | 22  | 130    |
| -----TAGTTTTGCATAGTTGCACTAC-----                                                                                | mirL    | 22  | 77     |
| -----AGTTTTGCATAGTTGCACTACA-----                                                                                | mirL    | 23  | 61     |
| -----TAGTTTTGCATAGTTGCACTACA-----                                                                               | mirL    | 19  | 37     |
| -----AGTTTTGCATAGTTGCACT-----                                                                                   | mirL    | 21  | 36     |
| -----TAGTTTTGCATAGTTGCACTA-----                                                                                 | mirL    | 18  | 18     |
| -----GTTTTGCATAGTTGCACT-----                                                                                    | mirL    | 22  | 12     |
| -----GTTAGTTTTGCATAGTTGCACT-----                                                                                | mirL    | 23  | 10     |
| -----AGTTTTGCATAGTTGCACTACAA-----                                                                               | mirL    | 24  | 10     |
| -----TAGTTTTGCATAGTTGCACTACAA-----                                                                              | mirL    | 18  | 8      |
| -----AGTTTTGCATAGTTGCAC-----                                                                                    | mirL    | 19  | 5      |
| -----GTTTTGCATAGTTGCACTA-----                                                                                   | mirL    | 22  | 2      |
| -----TTAGTTTTGCATAGTTGCACTA-----                                                                                | mirL    | 19  | 2      |
| -----TAGTTTTGCATAGTTGCAC-----                                                                                   | mirL    | 18  | 2      |
| -----GTTAGTTTTGCATAGTTG-----                                                                                    | mirL    | 24  | 1      |
| -----AGTTTTGCATAGTTGCACTACAAG-----                                                                              | mirL    | 21  | 1      |
| -----TTTTGCATAGTTGCACTACAA-----                                                                                 | mirL    | 18  | 1      |
| -----TTTTGCATAGTTGCACTA-----                                                                                    | loop    | 18  | 1      |
| -----ACAAGAAGAATGTAGTTG-----                                                                                    | loop    | 19  | 1      |
| -----ACAAGAAGAATGTAGTTGT-----                                                                                   | mirR    | 23  | 314663 |
| -----TGTGCAAATCTATGCAAACTGA-----                                                                                | mirR    | 22  | 46554  |
| -----TGTGCAAATCTATGCAAACTG-----                                                                                 | mirR    | 24  | 10629  |
| -----TGTGCAAATCTATGCAAACTGAT-----                                                                               | mirR    | 21  | 7662   |
| -----TGTGCAAATCTATGCAAACT-----                                                                                  | mirR    | 22  | 7463   |
| -----GTGCAAATCTATGCAAACTGA-----                                                                                 | mirR    | 24  | 7283   |
| -----TTGTGCAAATCTATGCAAACTGA-----                                                                               | mirR    | 23  | 2192   |
| -----TTGTGCAAATCTATGCAAACTG-----                                                                                | mirR    | 25  | 1556   |
| -----TGTGCAAATCTATGCAAACTGATG-----                                                                              | mirR    | 21  | 1222   |
| -----GTGCAAATCTATGCAAACTG-----                                                                                  | mirR    | 20  | 1162   |
| -----TGTGCAAATCTATGCAAAAC-----                                                                                  | mirR    | 19  | 1122   |
| -----TGTGCAAATCTATGCAAAA-----                                                                                   | mirR    | 22  | 577    |
| -----TTGTGCAAATCTATGCAAACT-----                                                                                 | mirR    | 23  | 363    |
| -----GTGCAAATCTATGCAAACTGAT-----                                                                                | mirR    | 20  | 194    |
| -----GTGCAAATCTATGCAAACT-----                                                                                   | mirR    | 25  | 169    |
| -----TTGTGCAAATCTATGCAAACTGAT-----                                                                              | mirR    | 21  | 76     |
| -----TTGTGCAAATCTATGCAAAAC-----                                                                                 |         |     |        |

```

-----GTGCAAATCTATGCAAAAC----- mirR 19 69
-----GCAAATCTATGCAAAACTGA----- mirR 20 67
-----GTGCAAATCTATGCAAAA----- mirR 18 60
-----GTGCAAATCTATGCAAAACTGATG----- mirR 24 43
-----TTGTGCAAATCTATGCAAAA----- mirR 20 35
-----GCAAATCTATGCAAAACTG----- mirR 19 23
-----TGCAAATCTATGCAAAACTGA----- mirR 21 23
-----GCAAATCTATGCAAAACT----- mirR 18 22
-----AGTTGTGCAAATCTATGCAAAACT----- mirR 24 16
-----AGTTGTGCAAATCTATGCAAAACTGA----- mirR 26 14
-----GTTGTGCAAATCTATGCAAAACTGA----- mirR 25 13
-----TGCAAATCTATGCAAAACTG----- mirR 20 13
-----TTGTGCAAATCTATGCAAAACTGATG----- mirR 26 11
-----TGCAAATCTATGCAAAACT----- mirR 19 10
-----GTTGTGCAAATCTATGCAAAACTG----- mirR 24 10
-----TGCAAATCTATGCAAAACTGATG----- mirR 23 3
-----GCAAATCTATGCAAAACTGAT----- mirR 21 3
-----AGTTGTGCAAATCTATGCAAAACTG----- mirR 25 2
-----AGTTGTGCAAATCTATGCAAAAC----- mirR 23 2
-----GTTGTGCAAATCTATGCAAAACTGAT----- mirR 26 1
-----AGTTGTGCAAATCTATGCAAAA----- mirR 22 1
-----TGCAAATCTATGCAAAAC----- mirR 18 1
-----TGGTGGCCTGCTATTTACTTCA----- morR 22 2
-----TGGTGGCCTGCTATTTACTTCAAGTGTGTTTTT morR 35 1
-----ATGGTGGCCTGCTATTTA----- morR 18 1

```

>mmu-mir-150

```

AGGCAGAGGACTCTTCTCAATGCCCTGTCTCCAACCCTTGTACCAGTCTGTGCCTCAGACCCTGGTACAGGCCTGGGGATAGGGACTTGGGAACCCAGCAGCAACAACCTCCAGC species len reads
-----ACTCTTCTCAATGCCCTG----- morL 18 79
-----GACTCTTCTCAATGCCCTG----- morL 19 33
-----AGGACTCTTCTCAATGCC----- morL 18 9
-----GACTCTTCTCAATGCCCTGT----- morL 20 3
AGGCAGAGGACTCTTCTCAATGCC----- morL 24 3
-----CTCTTCTCAATGCCCTGT----- morL 18 3
-----ACTCTTCTCAATGCCCTGT----- morL 19 2
-----GAGGACTCTTCTCAATGCCCT----- morL 21 2
-----GAGGACTCTTCTCAATGCCCTG----- morL 22 1
-----GAGGACTCTTCTCAATGCC----- morL 19 1
-----TCTCCAACCCTTGTACCAGTG----- mirL 22 293053
-----TCTCCAACCCTTGTACCAGTGC----- mirL 23 71224
-----TCTCCAACCCTTGTACCAGT----- mirL 21 26509
-----CTCCAACCCTTGTACCAGTG----- mirL 21 2945
-----TCTCCAACCCTTGTACCAG----- mirL 20 2917
-----TCTCCAACCCTTGTACCAGTCT----- mirL 24 2297
-----CTCCAACCCTTGTACCAGTGC----- mirL 22 1004
-----TCTCCAACCCTTGTACCA----- mirL 19 612

```

|                                      |      |    |     |
|--------------------------------------|------|----|-----|
| -----CTCCCAACCCTTGTACCAGT-----       | mirL | 20 | 496 |
| -----TCTCCCAACCCTTGTACCAGTGCTG-----  | mirL | 25 | 298 |
| -----TGTCTCCCAACCCTTGTACCAGT-----    | mirL | 23 | 190 |
| -----TGTCTCCCAACCCTTGTACCAGTG-----   | mirL | 24 | 138 |
| -----CTCCCAACCCTTGTACCAGTGCT-----    | mirL | 23 | 89  |
| -----CTCCCAACCCTTGTACCAG-----        | mirL | 19 | 66  |
| -----TGTCTCCCAACCCTTGTACCAGTGC-----  | mirL | 25 | 44  |
| -----GTCTCCCAACCCTTGTACCAGTG-----    | mirL | 23 | 43  |
| -----CTCCCAACCCTTGTACCA-----         | mirL | 18 | 30  |
| -----TCCCAACCCTTGTACCAGTG-----       | mirL | 20 | 20  |
| -----TGTCTCCCAACCCTTGTACCAG-----     | mirL | 22 | 18  |
| -----CCCAACCCTTGTACCAGTG-----        | mirL | 20 | 16  |
| -----CTCCCAACCCTTGTACCAGTGCTG-----   | mirL | 24 | 14  |
| -----CCCAACCCTTGTACCAGTG-----        | mirL | 19 | 10  |
| -----GTCTCCCAACCCTTGTACCAGTGC-----   | mirL | 24 | 9   |
| -----TGTCTCCCAACCCTTGTACCA-----      | mirL | 21 | 6   |
| -----TCCCAACCCTTGTACCAGTGC-----      | mirL | 21 | 4   |
| -----TCCCAACCCTTGTACCAGT-----        | mirL | 19 | 3   |
| -----CTGTCTCCCAACCCTTGTAC-----       | mirL | 19 | 3   |
| -----TCCCAACCCTTGTACCAGTGCT-----     | mirL | 22 | 2   |
| -----GTCTCCCAACCCTTGTACCAGT-----     | mirL | 22 | 1   |
| -----GTCTCCCAACCCTTGTAC-----         | mirL | 18 | 1   |
| -----CTGTCTCCCAACCCTTGTACCAGTG-----  | mirL | 25 | 1   |
| -----CTGTCTCCCAACCCTTGT-----         | mirL | 18 | 1   |
| -----TGTCTCCCAACCCTTGTACCAGTGCT----- | mirL | 26 | 1   |
| -----TCCCAACCCTTGTACCAG-----         | mirL | 18 | 1   |
| -----TGTCTCCCAACCCTTGTAC-----        | mirL | 18 | 1   |
| -----TGCTGTGCCTCAGACCCT-----         | loop | 18 | 4   |
| -----GCTGTGCCTCAGACCCTG-----         | loop | 18 | 1   |
| -----CTGGTACAGGCCTGGGGGATA-----      | mirR | 21 | 703 |
| -----CTGGTACAGGCCTGGGGGATAG-----     | mirR | 22 | 700 |
| -----CCTGGTACAGGCCTGGGGGATA-----     | mirR | 22 | 151 |
| -----CCTGGTACAGGCCTGGGGGATAG-----    | mirR | 23 | 51  |
| -----CTGGTACAGGCCTGGGGGAT-----       | mirR | 20 | 40  |
| -----CTGGTACAGGCCTGGGGGATAGG-----    | mirR | 23 | 31  |
| -----CCTGGTACAGGCCTGGGGGA-----       | mirR | 20 | 22  |
| -----CCTGGTACAGGCCTGGGGGAT-----      | mirR | 21 | 21  |
| -----CCTGGTACAGGCCTGGGGGATAGG-----   | mirR | 24 | 18  |
| -----CCTGGTACAGGCCTGGGGGATAGGG-----  | mirR | 25 | 17  |
| -----GGTACAGGCCTGGGGGATAG-----       | mirR | 20 | 16  |
| -----CTGGTACAGGCCTGGGGGA-----        | mirR | 19 | 15  |
| -----TGGTACAGGCCTGGGGGATAG-----      | mirR | 21 | 11  |
| -----GTACAGGCCTGGGGGATAG-----        | mirR | 19 | 9   |
| -----CTGGTACAGGCCTGGGGGATAGGGAC----- | mirR | 26 | 5   |
| -----CCCTGGTACAGGCCTGGGGGATA-----    | mirR | 23 | 4   |
| -----CCTGGTACAGGCCTGGGGG-----        | mirR | 19 | 4   |

```

-----TGGTACAGGCCTGGGGGATAGG----- mirR 22 2
-----GGTACAGGCCTGGGGGATA----- mirR 19 2
-----GTACAGGCCTGGGGGATAGGGA----- mirR 22 1
-----TGGTACAGGCCTGGGGGA----- mirR 18 1
-----TGGTACAGGCCTGGGGGATAGGG----- mirR 23 1
-----CTGGTACAGGCCTGGGG----- mirR 18 1
-----TGGTACAGGCCTGGGGGATA----- mirR 20 1
-----GGGACTTGGGAACCCAGCAGCAACA----- morR 26 97
-----GGGACTTGGGAACCCAGCAGCAACAA----- morR 27 50
-----GGGACTTGGGAACCCAGCAGCAACAACCTCCAGC morR 34 32
-----GGGACTTGGGAACCCAGCA----- morR 20 23
-----GGGACTTGGGAACCCAGCAGCAAC----- morR 25 21
-----GGGACTTGGGAACCCAGCAGCAACAAC----- morR 28 21
-----GGGACTTGGGAACCCAGC----- morR 19 20
-----TAGGGACTTGGGAACCC----- morR 18 1
-----GGACTTGGGAACCCAGC----- morR 18 1
-----ATAGGGACTTGGGAACCC----- morR 18 1
-----AGGGACTTGGGAACCCCA----- morR 18 1

>mmu-mir-27a
AACAGAGAAGCCTATCATGACAACCTGGCCTGAGGAGCAGGGCTTAGCTGCTTGTGAGCAAGGTCCACAGCAAAGTCGTGTTTACAGTGGCTAAGTTCGCCCCCTGGACCCCATCTCCTCAGGCCGCTGCTGCC spec
-----GACAACCTGGCCTGAGGAGC----- morL
-----ACAACCTGGCCTGAGGAGC----- morL
-----ATGACAACCTGGCCTGAGGAG----- morL
-----ATGACAACCTGGCCTGAGGAGC----- morL
-----GACAACCTGGCCTGAGGAGCA----- morL
-----GACAACCTGGCCTGAGGAG----- morL
-----ACAACCTGGCCTGAGGAGCA----- morL
-----CCTATCATGACAACCTGGCCTGAGGAGC----- morL
-----TGACAACCTGGCCTGAGGAG----- morL
-----TGACAACCTGGCCTGAGGAGC----- morL
-----ATGACAACCTGGCCTGAGG----- morL
-----ATGACAACCTGGCCTGAGGAGCA----- morL
-----ATGACAACCTGGCCTGAGGA----- morL
-----AGCCTATCATGACAACCTGGCCTGAGGAGC----- morL
-----AGAGAAGCCTATCATGACAACCTGGCCTGAGGA----- morL
-----CAACTGGCCTGAGGAGCA----- morL
-----AGAGAAGCCTATCATGACAACCTGGCCTGAGGAG----- morL
-----TGACAACCTGGCCTGAGGAGCA----- morL
-----GAAGCCTATCATGACAACCTGGCCTGAGGAGC----- morL
-----CAACTGGCCTGAGGAGCAG----- morL
-----ACAACCTGGCCTGAGGAGCAG----- morL
-----CAACTGGCCTGAGGAGCAG----- morL
AACAGAGAAGCCTATCATGACAACCTGGCCTGAGG----- morL
-----GACAACCTGGCCTGAGGAGCAG----- morL
-----GACAACCTGGCCTGAGGAGCAG----- morL

```

```
-----TGACAACCTGGCCTGAGGA----- morL
-----AGGGCTTAGCTGCTTGTGAGCA----- mirL
-----AGGGCTTAGCTGCTTGTGAGC----- mirL
-----AGGGCTTAGCTGCTTGTGAGCAA----- mirL
-----AGGGCTTAGCTGCTTGTGAGCAAG----- mirL
-----AGGGCTTAGCTGCTTGTGAG----- mirL
-----GGCTTAGCTGCTTGTGAGCAAGGT----- mirL
-----GGGCTTAGCTGCTTGTGAGCA----- mirL
-----GGCTTAGCTGCTTGTGAGCAA----- mirL
-----AGGGCTTAGCTGCTTGTG----- mirL
-----AGGGCTTAGCTGCTTGTGAGCAAGGT----- mirL
-----GGCTTAGCTGCTTGTGAGCAAG----- mirL
-----GGGCTTAGCTGCTTGTGAGC----- mirL
-----GGCTTAGCTGCTTGTGAGCAAGGTC----- mirL
-----GGCTTAGCTGCTTGTGAGCAAGG----- mirL
-----GGCTTAGCTGCTTGTGAGCAAGGTCCAC----- mirL
-----GGCTTAGCTGCTTGTGAGCAAGGTCC----- mirL
-----AGGTCCACAGCAAAGTCGTG----- loop
-----AGGTCCACAGCAAAGTCGTGT----- loop
-----AGGTCCACAGCAAAGTCGT----- loop
-----GGTCCACAGCAAAGTCGTG----- loop
-----GTCCACAGCAAAGTCGTG----- loop
-----AGGTCCACAGCAAAGTCG----- loop
-----AGGTCCACAGCAAAGTCGTGT----- loop
-----GGTCCACAGCAAAGTCGT----- loop
-----AAGGTCCACAGCAAAGTC----- loop
-----AAGGTCCACAGCAAAGTCGTG----- loop
-----GGTCCACAGCAAAGTCGTGT----- loop
-----AGGTCCACAGCAAAGTCGTGTTC----- loop
-----TCCACAGCAAAGTCGTGT----- loop
-----GGTCCACAGCAAAGTCGTGTTC----- loop
-----TTCACAGTGGCTAAGTTCCGC----- mirR
-----TTCACAGTGGCTAAGTTCCG----- mirR
-----TTCACAGTGGCTAAGTTCCGCC----- mirR
-----TTCACAGTGGCTAAGTTCCGCC----- mirR
-----TTCACAGTGGCTAAGTTCCGCC----- mirR
-----TTCACAGTGGCTAAGTTCCGCC----- mirR
-----TCACAGTGGCTAAGTTCCGC----- mirR
-----TCACAGTGGCTAAGTTCCG----- mirR
-----TTCACAGTGGCTAAGTTCCGCC----- mirR
-----TCACAGTGGCTAAGTTCCGCC----- mirR
-----TCACAGTGGCTAAGTTCCGCC----- mirR
-----GTTACAGTGGCTAAGTTCCGC----- mirR
-----TCACAGTGGCTAAGTTCCGCC----- mirR
-----TCACAGTGGCTAAGTTCC----- mirR
-----GTTACAGTGGCTAAGTTCCG----- mirR
```

```

-----TCACAGTGGCTAAGTTCGGCCCC----- mirR
-----GTTTCACAGTGGCTAAGTTCGGCC----- mirR
-----GTTTCACAGTGGCTAAGTTCGGCC----- mirR
-----GTTTCACAGTGGCTAAGTTC----- mirR
-----ACAGTGGCTAAGTTCGGC----- mirR
-----GTTTCACAGTGGCTAAGTTCGGCCCC----- mirR
-----CACAGTGGCTAAGTTCGGC----- mirR
-----CACAGTGGCTAAGTTCGG----- mirR
-----CACAGTGGCTAAGTTCGGCC----- mirR
-----CACAGTGGCTAAGTTCGGCC----- mirR
-----GTTTCACAGTGGCTAAGTTCGGCCCC----- mirR
-----ACAGTGGCTAAGTTCGGCC----- mirR
-----ACAGTGGCTAAGTTCGGCC----- mirR
-----TGTTTCACAGTGGCTAAGTTCGGC----- mirR
-----ACAGTGGCTAAGTTCGGCCCC----- mirR
-----GTGTTTCACAGTGGCTAAGTTCGGC----- mirR
-----GTGTTTCACAGTGGCTAAGTTC----- mirR
-----TGTTTCACAGTGGCTAAGTTCGG----- mirR
-----GTGTTTCACAGTGGCTAAGTTCGG----- mirR
-----CACAGTGGCTAAGTTCGGCCCC----- mirR
-----GTGTTTCACAGTGGCTAAGTTCGGCC----- mirR
-----TGTTTCACAGTGGCTAAGTTCGGCC----- mirR
-----GTGTTTCACAGTGGCTAAGT----- mirR
-----TGTTTCACAGTGGCTAAGTTC----- mirR
-----CCCCTGGACCCCATCTCCTCAGGCCGCTGCTGCC morR
-----CCCCTGGACCCCATCTCCTCAGGC----- morR
-----CCCCTGGACCCCATCTCCT----- morR
-----CCCCTGGACCCCATCTCCTCAGGCCGCT----- morR
-----CCCCTGGACCCCATCTCCTCAGGCCGCTGCTGCC morR
-----CCCCTGGACCCCATCTCCTCAGGCCGCTGC----- morR
-----CCCCTGGACCCCATCTCCTCAG----- morR
-----CCCTGGACCCCATCTCCTCAG----- morR
-----CCTGGACCCCATCTCCTC----- morR
-----CGCCCCCTGGACCCCATC----- morR
-----CGCCCCCTGGACCCCATCT----- morR

```

>mmu-mir-30c-1

```

CCCCTGGGCTGTAACCATGTTGTAGTGTGTGTAACATCCTACACTCTCAGCTGTGAGCTCAAGGTGGCTGGGAGAGGGTTGTTTACTCCTTCTGCCATGGAAAACGTCAG species len reads
-----CTGTAACCATGTTGTAGTGTG----- morL 21 283
CCCCTGGGCTGTAACCATGTTGTAGTGTG----- morL 29 15
-----TGTAACCATGTTGTAGTGTG----- morL 20 13
-----GCTGTAACCATGTTGTAGTGTG----- morL 22 11
-----CTGTAACCATGTTGTAGTGTG----- morL 22 8
-----GGCTGTAACCATGTTGTAGTGTG----- morL 23 5
-----CTGTAACCATGTTGTAGTGTG----- morL 19 3
-----CTGTAACCATGTTGTAGTGTG----- morL 20 3

```

```

-----TGTAACCATGTTGTAGTGTGT----- morL 21 2
----TGGGCTGTAACCATGTTGTAGTGTG----- morL 25 2
-----CTGTAACCATGTTGTAGTGTGT----- morL 23 2
-----CTGTAACCATGTTGTAGT----- morL 18 2
----GGGCTGTAACCATGTTGTAGTGTGT----- morL 26 1
----GGCTGTAACCATGTTGTAGTGT----- morL 21 1
----GCTGTAACCATGTTGTAGTGTGT----- morL 23 1
--CCCTGGGCTGTAACCATGTTGTAGTGTG----- morL 28 1
-----GTAACCATGTTGTAGTGTGT----- morL 20 1
-----TGTA AACATCCTACACTCTCAGCT----- mirL 24 260399
-----TGTA AACATCCTACACTCTCAGC----- mirL 23 49771
-----TGTA AACATCCTACACTCTCAGCTG----- mirL 25 30082
-----TGTA AACATCCTACACTCTCAGCTGT----- mirL 26 15210
-----GTA AACATCCTACACTCTCAGCT----- mirL 23 10286
-----TGTA AACATCCTACACTCTCAGCTGTG----- mirL 27 4562
-----TGTA AACATCCTACACTCTCAG----- mirL 22 4446
-----GTA AACATCCTACACTCTCAGC----- mirL 22 2564
-----TGTA AACATCCTACACTCTCA----- mirL 21 2064
-----GTA AACATCCTACACTCTCAGCTG----- mirL 24 1693
-----GTA AACATCCTACACTCTCAGCTGT----- mirL 25 995
-----GTA AACATCCTACACTCTCAGCTGTG----- mirL 26 199
-----GTA AACATCCTACACTCTCAG----- mirL 21 185
-----GTA AACATCCTACACTCT----- mirL 18 157
-----AAACATCCTACACTCTCAGCT----- mirL 21 113
-----TAAACATCCTACACTCTCAGCT----- mirL 22 59
-----GTGTAAACATCCTACACTCTCAGCT----- mirL 25 50
-----TAAACATCCTACACTCTCAGCTG----- mirL 23 26
-----AAACATCCTACACTCTCAGCTGT----- mirL 23 20
-----AAACATCCTACACTCTCAGCTG----- mirL 22 20
-----GTGTAAACATCCTACACTCTCAGC----- mirL 24 18
-----AAACATCCTACACTCTCAGC----- mirL 20 13
-----GTGTGTA AACATCCTACACTCTCAGCT----- mirL 27 13
-----TAAACATCCTACACTCTCAGC----- mirL 21 11
-----TAAACATCCTACACTCTCAGCTGT----- mirL 24 6
-----TAAACATCCTACACTCTCAGCTGTG----- mirL 25 4
-----AAACATCCTACACTCTCAG----- mirL 19 2
-----AAACATCCTACACTCTCA----- mirL 18 2
-----GTGTGTA AACATCCTACACTCTCAG----- mirL 25 2
-----GTGTAAACATCCTACACTCTCAGCTGT----- mirL 27 2
-----TAAACATCCTACACTCTCA----- mirL 19 1
-----GTGTAAACATCCTACACTCTCAGCTG----- mirL 26 1
-----GTGTAAACATCCTACACTCTCAG----- mirL 23 1
-----CTGGGAGAGGGTTGTTTACTCC----- mirR 22 169
-----CTGGGAGAGGGTTGTTTACTC----- mirR 21 99
-----CTGGGAGAGGGTTGTTTACTCCT----- mirR 23 76
-----TGGGAGAGGGTTGTTTACTCC----- mirR 21 21

```

```

-----GGGAGAGGGTTGTTTACTCC----- mirR 20 11
-----CTGGGAGAGGGTTGTTTACT----- mirR 20 11
-----CTGGGAGAGGGTTGTTTACTCCT----- mirR 24 9
-----GCTGGGAGAGGGTTGTTT----- mirR 18 6
-----GGGAGAGGGTTGTTTACTCCT----- mirR 21 4
-----GGAGAGGGTTGTTTACTCCT----- mirR 20 3
-----GGAGAGGGTTGTTTACTCC----- mirR 19 3
-----GGGAGAGGGTTGTTTACT----- mirR 18 3
-----CTGGGAGAGGGTTGTTTACT----- mirR 19 2
-----TGGGAGAGGGTTGTTTACTCCT----- mirR 22 2
-----GGCTGGGAGAGGGTTGTTT----- mirR 19 1
-----TGCCATGGAAAACGTCAG morR 18 1
-----CTGCCATGGAAAACGTCAG- morR 18 1

>mmu-mir-30c-2
CTAGAGAGCACTGAGTGACAGATATGTAAACATCCTACACTCTCAGCTGTGAAAAGTAAGAAAGCTGGGAGAAGGCTGTTTACTCTCTGCCTTGAAAATCAG species len reads
---GAGAGCACTGAGTGACAGATAT----- morL 22 51
---GAGCACTGAGTGACAGATAT----- morL 20 27
---AGAGCACTGAGTGACAGATAT----- morL 21 11
---GAGAGCACTGAGTGACAGATA----- morL 21 4
---AGAGCACTGAGTGACAGA----- morL 18 2
--AGAGAGCACTGAGTGACAGATAT----- morL 23 2
-TAGAGAGCACTGAGTGACAGATAT----- morL 24 1
---AGCACTGAGTGACAGATA----- morL 18 1
---GAGAGCACTGAGTGACAGATATT----- morL 23 1
---ACTGAGTGACAGATATTG----- morL 18 1
-TAGAGAGCACTGAGTGACAGAT----- morL 22 1
CTAGAGAGCACTGAGTGACAGATAT----- morL 25 1
---GAGCACTGAGTGACAGAT----- morL 18 1
---GCACTGAGTGACAGATAT----- morL 18 1
-----TGTAACATCCTACACTCTCAGCT----- mirL 24 260399
-----TGTAACATCCTACACTCTCAGC----- mirL 23 49771
-----TGTAACATCCTACACTCTCAGCTG----- mirL 25 30082
-----TGTAACATCCTACACTCTCAGCTGT----- mirL 26 15210
-----GTAACATCCTACACTCTCAGCT----- mirL 23 10286
-----TGTAACATCCTACACTCTCAGCTGTG----- mirL 27 4562
-----TGTAACATCCTACACTCTCAG----- mirL 22 4446
-----GTAACATCCTACACTCTCAGC----- mirL 22 2564
-----TGTAACATCCTACACTCTCA----- mirL 21 2064
-----GTAACATCCTACACTCTCAGCTG----- mirL 24 1693
-----GTAACATCCTACACTCTCAGCTGT----- mirL 25 995
-----GTAACATCCTACACTCTCAGCTGTG----- mirL 26 199
-----GTAACATCCTACACTCTCAG----- mirL 21 185
-----GTAACATCCTACACTCT----- mirL 18 157
-----AAACATCCTACACTCTCAGCT----- mirL 21 113
-----TTGTAACATCCTACACTCTCAGCT----- mirL 25 84

```



```

-----TAAACATCCTACACTCTCAGCT----- mirL 22 59
-----TATTGTA AACATCCTACACTCTCAGCT----- mirL 27 39
-----TTGTA AACATCCTACACTCTCAGC----- mirL 24 36
-----TAAACATCCTACACTCTCAGCTG----- mirL 23 26
-----ATTGTA AACATCCTACACTCTCAGCT----- mirL 26 26
-----AAACATCCTACACTCTCAGCTG----- mirL 22 20
-----AAACATCCTACACTCTCAGCTGT----- mirL 23 20
-----AAACATCCTACACTCTCAGC----- mirL 20 13
-----TTGTA AACATCCTACACTCTCAGCTG----- mirL 26 12
-----TAAACATCCTACACTCTCAGC----- mirL 21 11
-----TATTGTA AACATCCTACACTCTCAGC----- mirL 26 9
-----TTGTA AACATCCTACACTCTCAG----- mirL 23 8
-----TTGTA AACATCCTACACTCTCAGCTGTG----- mirL 28 7
-----TAAACATCCTACACTCTCAGCTGT----- mirL 24 6
-----ATTGTA AACATCCTACACTCTCAGCTGT----- mirL 28 6
-----ATTGTA AACATCCTACACTCTCAG----- mirL 24 5
-----TAAACATCCTACACTCTCAGCTGTG----- mirL 25 4
-----TTGTA AACATCCTACACT----- mirL 18 2
-----AAACATCCTACACTCTCAG----- mirL 19 2
-----AAACATCCTACACTCTCA----- mirL 18 2
-----TTGTA AACATCCTACACTCTCAGCTGT----- mirL 27 2
-----TATTGTA AACATCCTACA----- mirL 18 1
-----TAAACATCCTACACTCTCA----- mirL 19 1
-----ATTGTA AACATCCTACACT----- mirL 19 1
-----ATTGTA AACATCCTACAC----- mirL 18 1
-----TATTGTA AACATCCTACACTCTCA----- mirL 24 1
-----TGTGAAAAGTAAGAAAGC----- loop 18 2
-----GTGAAAAGTAAGAAAGCT----- loop 18 2
-----GCTGTGAAAAGTAAGAAA----- loop 18 1
-----TGAAAAGTAAGAAAGCTG----- loop 18 1
-----CTGGGAGAAGGCTGTTTACTCT----- mirR 22 256
-----CTGGGAGAAGGCTGTTTACTCTC----- mirR 23 68
-----TGGGAGAAGGCTGTTTACTCT----- mirR 21 36
-----CTGGGAGAAGGCTGTTTACTC----- mirR 21 28
-----CTGGGAGAAGGCTGTTTACTCTCT----- mirR 24 15
-----TGGGAGAAGGCTGTTTACTCTC----- mirR 22 6
-----CTGGGAGAAGGCTGTTTA----- mirR 18 5
-----CTGGGAGAAGGCTGTTTACT----- mirR 20 4
-----CTGGGAGAAGGCTGTTTAC----- mirR 19 4
-----GGGAGAAGGCTGTTTACTCT----- mirR 20 2
-----GGGAGAAGGCTGTTTACTCTC----- mirR 21 2
-----GGGAGAAGGCTGTTTACT----- mirR 18 2
-----AAGCTGGGAGAAGGCTGTTTACTCTC----- mirR 26 1
-----GGAGAAGGCTGTTTACTCTCTC----- mirR 22 1
-----GGAGAAGGCTGTTTACTCT----- mirR 19 1
-----GCTGGGAGAAGGCTGTTTA----- mirR 19 1

```

```

-----TGGGAGAAGGCTGTTTACT----- mirR 19 1
-----TGGGAGAAGGCTGTTTACTC----- mirR 20 1
-----GCTGGGAGAAGGCTGTTT----- mirR 18 1
-----CTCTGCCTTGGAATCAG morR 18 3
-----TCTCTGCCTTGGAATCA morR 18 2
-----CTCTCTGCCTTGGAATC-- morR 18 1
-----TCTCTCTGCCTTGGAAT-- morR 18 1

```

>mmu-mir-541

| ACTCTTGCCAAAATCAGAGAAGGGATTCTGATGTTGGTCACACTCCAAGAGTTTAAAAATGAGTGGCGAACACAGAATCCATACTCTGCTTATGGCCTAAGTCAATGGATCCTGACCC | species | len | reads  |
|------------------------------------------------------------------------------------------------------------------------|---------|-----|--------|
| ACTCTTGCCAAAATCAGAGA                                                                                                   | morL    | 20  | 1      |
| ---CTTGCCAAAATCAGAGAAG                                                                                                 | morL    | 19  | 1      |
| -CTCTTGCCAAAATCAGAG-                                                                                                   | morL    | 18  | 1      |
| ACTCTTGCCAAAATCAGA                                                                                                     | morL    | 18  | 1      |
| -----AAGGGATTCTGATGTTGGTCACACT-                                                                                        | mirL    | 25  | 140287 |
| -----AAGGGATTCTGATGTTGGTCACACTC-                                                                                       | mirL    | 26  | 78698  |
| -----AAGGGATTCTGATGTTGGTCACAC-                                                                                         | mirL    | 24  | 45151  |
| -----AAGGGATTCTGATGTTGGTCACA-                                                                                          | mirL    | 23  | 40804  |
| -----AAGGGATTCTGATGTTGGTCACACTCC-                                                                                      | mirL    | 27  | 31406  |
| -----AAGGGATTCTGATGTTGGTCAC-                                                                                           | mirL    | 22  | 21188  |
| -----AAGGGATTCTGATGTTGGTCA-                                                                                            | mirL    | 21  | 8433   |
| -----AGGGATTCTGATGTTGGTCACACT-                                                                                         | mirL    | 24  | 1538   |
| -----AGGGATTCTGATGTTGGTCACA-                                                                                           | mirL    | 22  | 662    |
| -----AGGGATTCTGATGTTGGTCACACTC-                                                                                        | mirL    | 25  | 514    |
| -----AGGGATTCTGATGTTGGTCACACTCC-                                                                                       | mirL    | 26  | 316    |
| -----AGGGATTCTGATGTTGGTCACAC-                                                                                          | mirL    | 23  | 278    |
| -----GGGATTCTGATGTTGGTCACA-                                                                                            | mirL    | 21  | 184    |
| -----GGATTCTGATGTTGGTCACA-                                                                                             | mirL    | 20  | 95     |
| -----GGGATTCTGATGTTGGTCACACT-                                                                                          | mirL    | 23  | 88     |
| -----AGGGATTCTGATGTTGGTCAC-                                                                                            | mirL    | 21  | 60     |
| -----GGATTCTGATGTTGGTCACACT-                                                                                           | mirL    | 22  | 43     |
| -----AGGGATTCTGATGTTGGTCA-                                                                                             | mirL    | 20  | 32     |
| -----GGATTCTGATGTTGGTCAC-                                                                                              | mirL    | 19  | 26     |
| -----GGGATTCTGATGTTGGTCACAC-                                                                                           | mirL    | 22  | 24     |
| -----GGGATTCTGATGTTGGTCACACTC-                                                                                         | mirL    | 24  | 19     |
| -----GAAGGGATTCTGATGTTGGTCACACT-                                                                                       | mirL    | 26  | 18     |
| -----GGGATTCTGATGTTGGTCAC-                                                                                             | mirL    | 20  | 18     |
| -----GAAGGGATTCTGATGTTGGTCAC-                                                                                          | mirL    | 23  | 8      |
| -----GGGATTCTGATGTTGGTCA-                                                                                              | mirL    | 19  | 8      |
| -----GAAGGGATTCTGATGTTGGTCACAC-                                                                                        | mirL    | 25  | 8      |
| -----GGATTCTGATGTTGGTCACACTCC-                                                                                         | mirL    | 24  | 8      |
| -----GAAGGGATTCTGATGTTGGTCACACTC-                                                                                      | mirL    | 27  | 8      |
| -----GAAGGGATTCTGATGTTGGTCACACTCC-                                                                                     | mirL    | 28  | 6      |
| -----GGATTCTGATGTTGGTCACAC-                                                                                            | mirL    | 21  | 5      |
| -----AGAAGGGATTCTGATGTTGGTCACACT-                                                                                      | mirL    | 27  | 4      |
| -----GAAGGGATTCTGATGTTG                                                                                                | mirL    | 18  | 3      |

```

-----GAAGGGATTCTGATGTTGGTCACA----- mirL 24 3
-----GAGAAGGGATTCTGATGTTGGTCACACTC----- mirL 29 2
-----GGATTCTGATGTTGGTCACACTC----- mirL 23 2
-----GGGATTCTGATGTTGGTCACACTCCA----- mirL 26 1
-----GAGAAGGGATTCTGATGTTGGTCACA----- mirL 26 1
-----GAGAAGGGATTCTGATGTTGGTCAC----- mirL 25 1
-----AGAAGGGATTCTGATGTTGGTCACACTCC----- mirL 29 1
-----GAGAAGGGATTCTGATGTTGGTCA----- mirL 24 1
-----GGATTCTGATGTTGGTCA----- mirL 18 1
-----AGAAGGGATTCTGATGTTGGTCACACTC----- mirL 28 1
-----CCAAGAGTTTTAAAATGAG----- loop 19 9
-----CTCCAAGAGTTTTAAAAT----- loop 18 2
-----TGGCGAACACAGAATCCATACT----- mirR 22 1526
-----AGTGGCGAACACAGAATCCATAC----- mirR 23 1081
-----AGTGGCGAACACAGAATCCATA----- mirR 22 858
-----AGTGGCGAACACAGAATCCAT----- mirR 21 412
-----AGTGGCGAACACAGAATCCATACT----- mirR 24 371
-----TGGCGAACACAGAATCCATAC----- mirR 21 306
-----GTGGCGAACACAGAATCCATAC----- mirR 22 227
-----GTGGCGAACACAGAATCCATA----- mirR 21 154
-----TGGCGAACACAGAATCCATA----- mirR 20 98
-----AGTGGCGAACACAGAATCCA----- mirR 20 80
-----GTGGCGAACACAGAATCCATACT----- mirR 23 67
-----TGGCGAACACAGAATCCATACTC----- mirR 23 53
-----GTGGCGAACACAGAATCCATACTCT----- mirR 25 21
-----GTGGCGAACACAGAATCCAT----- mirR 20 19
-----AGTGGCGAACACAGAATCCATACTC----- mirR 25 13
-----AGTGGCGAACACAGAATCC----- mirR 19 11
-----TGGCGAACACAGAATCCAT----- mirR 19 10
-----GGCGAACACAGAATCCATACT----- mirR 21 10
-----GTGGCGAACACAGAATCC----- mirR 18 9
-----GGCGAACACAGAATCCATAC----- mirR 20 8
-----GAGTGGCGAACACAGAATCCATA----- mirR 23 6
-----GTGGCGAACACAGAATCCA----- mirR 19 5
-----TGGCGAACACAGAATCCATACTCT----- mirR 24 2
-----TGGCGAACACAGAATCCA----- mirR 18 2
-----GAGTGGCGAACACAGAATCCA----- mirR 21 1
-----GAGTGGCGAACACAGAATCCATACT----- mirR 25 1
-----GGCGAACACAGAATCCATA----- mirR 19 1
-----GCGAACACAGAATCCATAC----- mirR 19 1
-----CTGCTTATGGCCTAAGTCAATGGATCCTGACCC morR 33 5
-----ACTCTGCTTATGGCCTAA----- morR 18 1
-----CTGCTTATGGCCTAAGTCAATGGATCCTGAC-- morR 31 1
-----TGCTTATGGCCTAAGTCA----- morR 18 1
-----CTGCTTATGGCCTAAGTC----- morR 18 1

```

>mmu-mir-302d

| Sequence                                 | species | len | reads |
|------------------------------------------|---------|-----|-------|
| -----TGCTTAAGGGGCCTCCTTT-----            | morL    | 19  | 16    |
| -----CTGCTTAAGGGGCCTCCTTT-----           | morL    | 20  | 8     |
| -----GCTTAAGGGGCCTCCTTT-----             | morL    | 18  | 2     |
| -----TCTGCTTAAGGGGCCTCCTTT-----          | morL    | 20  | 2     |
| -----GTCTGCTTAAGGGGCCTCCTTT-----         | morL    | 21  | 2     |
| -----CTGCTTAAGGGGCCTCCTTTA-----          | morL    | 21  | 1     |
| -----TGCTTAAGGGGCCTCCTTT-----            | morL    | 18  | 1     |
| -----GTCTGCTTAAGGGGCCTCCTTT-----         | morL    | 22  | 1     |
| -----TCAAGTCTGCTTAAGGGGCCTCC-----        | morL    | 23  | 1     |
| -----TCTGCTTAAGGGGCCTCCTTT-----          | morL    | 21  | 1     |
| -----ACCCTCAAGTCTGCTTAAGGGGCCTCCTTT----- | morL    | 31  | 1     |
| -----GCTTAAGGGGCCTCCTTTA-----            | morL    | 19  | 1     |
| -----CACTCAAGTCTGCTTAAGGGGCCTCCTTT-----  | morL    | 29  | 1     |
| -----CTGCTTAAGGGGCCTCCTTT-----           | morL    | 19  | 1     |
| -----GTCTGCTTAAGGGGCCTCCT-----           | morL    | 20  | 1     |
| -----ACTTTAACATGGAGGCACTTGCT-----        | mirL    | 23  | 6606  |
| -----ACTTTAACATGGAGGCACTTG-----          | mirL    | 21  | 2453  |
| -----ACTTTAACATGGAGGCACTTGC-----         | mirL    | 22  | 2242  |
| -----TACTTTAACATGGAGGCACTTGCT-----       | mirL    | 24  | 1183  |
| -----TACTTTAACATGGAGGCACTTGC-----        | mirL    | 23  | 683   |
| -----TACTTTAACATGGAGGCACTTG-----         | mirL    | 22  | 514   |
| -----ACTTTAACATGGAGGCACTT-----           | mirL    | 20  | 249   |
| -----CTTTAACATGGAGGCACTTGCT-----         | mirL    | 22  | 126   |
| -----ACTTTAACATGGAGGCACTTGCTG-----       | mirL    | 24  | 95    |
| -----ACTTTAACATGGAGGCACT-----            | mirL    | 19  | 79    |
| -----TACTTTAACATGGAGGCACTT-----          | mirL    | 21  | 70    |
| -----TACTTTAACATGGAGGCACT-----           | mirL    | 20  | 47    |
| -----TACTTTAACATGGAGGCACTTGCTG-----      | mirL    | 25  | 36    |
| -----ACTTTAACATGGAGGCAC-----             | mirL    | 18  | 33    |
| -----TACTTTAACATGGAGGCACTTGCTGT-----     | mirL    | 26  | 25    |
| -----TTAACATGGAGGCACTTGCT-----           | mirL    | 20  | 15    |
| -----CTTTAACATGGAGGCACTTG-----           | mirL    | 20  | 11    |
| -----CTTTAACATGGAGGCACTTGC-----          | mirL    | 21  | 9     |
| -----TTAACATGGAGGCACTTGCT-----           | mirL    | 21  | 7     |
| -----TTAACATGGAGGCACTTGC-----            | mirL    | 19  | 3     |
| -----TTAACATGGAGGCACTTG-----             | mirL    | 18  | 3     |
| -----CTTTAACATGGAGGCACTT-----            | mirL    | 19  | 3     |
| -----TTAACATGGAGGCACTTGC-----            | mirL    | 20  | 2     |
| -----TTAACATGGAGGCACTT-----              | mirL    | 18  | 2     |
| -----CTTTAACATGGAGGCACTTGCTG-----        | mirL    | 23  | 1     |
| -----TTAACATGGAGGCACTTG-----             | mirL    | 19  | 1     |
| -----TTACTTTAACATGGAGGC-----             | mirL    | 18  | 1     |
| -----TTAACATGGAGGCACTTGCTG-----          | mirL    | 21  | 1     |
| -----TTACTTTAACATGGAGGCACTTGCT-----      | mirL    | 25  | 1     |

```

-----TTTAACATGGAGGCACTTGCTGT----- mirL 23 1
-----TAAGTGCTTCCATGTTTGAGTGT--- mirR 23 260729
-----AGTGCTTCCATGTTTGAGTGT--- mirR 21 36797
-----AAGTGCTTCCATGTTTGAGTGT--- mirR 22 33669
-----TAAGTGCTTCCATGTTTGAGTGTG-- mirR 24 12247
-----TAAGTGCTTCCATGTTTGAGTGTG--- mirR 22 4207
-----TAAGTGCTTCCATGTTTGAGTGTGG- mirR 25 2666
-----AAGTGCTTCCATGTTTGAGTGTG-- mirR 23 2159
-----AGTGCTTCCATGTTTGAGTGTG-- mirR 22 1590
-----TAAGTGCTTCCATGTTTGAGT----- mirR 21 1569
-----AAGTGCTTCCATGTTTGAGTGTG--- mirR 21 792
-----AAGTGCTTCCATGTTTGAGTGTGG- mirR 24 526
-----AGTGCTTCCATGTTTGAGTGTG--- mirR 20 360
-----AGTGCTTCCATGTTTGAGTGTGG- mirR 23 290
-----AAGTGCTTCCATGTTTGAGT----- mirR 20 170
-----TAAGTGCTTCCATGTTTGA----- mirR 19 162
-----TAAGTGCTTCCATGTTTGAGTGTGGT mirR 26 154
-----ATAAGTGCTTCCATGTTTGAGTGT--- mirR 24 112
-----GTGCTTCCATGTTTGAGTGT--- mirR 20 105
-----AAGTGCTTCCATGTTTGA----- mirR 18 60
-----AGTGCTTCCATGTTTGAGT----- mirR 19 45
-----AAGTGCTTCCATGTTTGAG----- mirR 19 28
-----AGTGCTTCCATGTTTGAGTGTGGT mirR 24 28
-----GTGCTTCCATGTTTGAGTGTGG- mirR 22 23
-----AGTGCTTCCATGTTTGAG----- mirR 18 14
-----GTGCTTCCATGTTTGAGTGTG-- mirR 21 13
-----ATAAGTGCTTCCATGTTT----- mirR 18 12
-----AATAAGTGCTTCCATGTTTGAGTGT--- mirR 25 9
-----ATAAGTGCTTCCATGTTTGAGT----- mirR 22 7
-----ATAAGTGCTTCCATGTTTGAGTGTG-- mirR 25 5

```

>mmu-mir-27b

```

ATGGCCGGCGATGACCTCTCTAACAAGGTGCAGAGCTTAGCTGATTGGTGAACAGTGATTGGTTCCGCTTTGTTTACAGTGGCTAAGTTCTGCACCTGAAGAGAAGGTGAGATGGGGACAGTTAAC species len
-----CGATGACCTCTCTAACAAGGTGC----- morL 23 6649
-----GATGACCTCTCTAACAAGGTGC----- morL 22 316
-----ATGACCTCTCTAACAAGGTGC----- morL 21 233
-----GCGATGACCTCTCTAACAAGGTGC----- morL 24 160
-----CGATGACCTCTCTAACAAGGTG----- morL 22 136
-----CGATGACCTCTCTAACAAGGTGCA----- morL 24 128
-----CGGCGATGACCTCTCTAACAAGGTGC----- morL 26 87
-----CCGGCGATGACCTCTCTAACAAGGTGC----- morL 27 83
-----GACCTCTCTAACAAGGTGC----- morL 19 55
-----CGATGACCTCTCTAACAAGGT----- morL 21 12
-----ATGACCTCTCTAACAAGGTGCA----- morL 22 10
-----GATGACCTCTCTAACAAGGTG----- morL 21 9
-----GATGACCTCTCTAACAAGGTGCA----- morL 23 8

```

|                                      |      |    |       |
|--------------------------------------|------|----|-------|
| -----ATGACCTCTTAACAAGGTG-----        | morL | 20 | 6     |
| ----CGGCGATGACCTCTTAACAAGGTG-----    | morL | 25 | 6     |
| ----CGGCGATGACCTCTTAACAAGGTGCA-----  | morL | 27 | 5     |
| -----GCGATGACCTCTTAACAAGGTGCA-----   | morL | 25 | 4     |
| ----GCGATGACCTCTTAACAAGGTG-----      | morL | 23 | 4     |
| -----CCTCTTAACAAGGTGCA-----          | morL | 18 | 3     |
| -----GACCTCTTAACAAGGTG-----          | morL | 18 | 3     |
| ----GCGATGACCTCTTAACAAGGT-----       | morL | 22 | 3     |
| ----TGACCTCTTAACAAGGTGCA-----        | morL | 21 | 3     |
| -----ATGACCTCTTAACAAGG-----          | morL | 18 | 2     |
| ----TGACCTCTTAACAAGGTGCAG-----       | morL | 22 | 2     |
| ----CGATGACCTCTTAACAAGGTGCAGA-----   | morL | 26 | 2     |
| ----CGGCGATGACCTCTTAACAAGGT-----     | morL | 24 | 2     |
| ----CGATGACCTCTTAACAAGGTGCAG-----    | morL | 25 | 2     |
| ----TGACCTCTTAACAAGGTG-----          | morL | 19 | 2     |
| ----GATGACCTCTTAACAAGGTGCAG-----     | morL | 24 | 1     |
| ATGGCCGGCGATGACCTCTTAACAAGGT-----    | morL | 29 | 1     |
| ----GATGACCTCTTAACAAGGT-----         | morL | 20 | 1     |
| -----TCTTAACAAGGTGCAGA-----          | morL | 18 | 1     |
| ----ATGACCTCTTAACAAGGT-----          | morL | 19 | 1     |
| ----CGATGACCTCTTAACAAGG-----         | morL | 20 | 1     |
| -----AGAGCTTAGCTGATTGGTGAACA-----    | mirL | 23 | 15510 |
| -----AGAGCTTAGCTGATTGGTGAAC-----     | mirL | 22 | 3934  |
| -----AGAGCTTAGCTGATTGGTGAACAGT-----  | mirL | 25 | 1948  |
| -----CAGAGCTTAGCTGATTGGTGAACA-----   | mirL | 24 | 1103  |
| -----AGAGCTTAGCTGATTGGTGAACAG-----   | mirL | 24 | 833   |
| -----AGAGCTTAGCTGATTGGTGAA-----      | mirL | 21 | 761   |
| -----AGAGCTTAGCTGATTGGTGA-----       | mirL | 20 | 359   |
| -----AGAGCTTAGCTGATTGGTGAACAGTG----- | mirL | 26 | 220   |
| -----CAGAGCTTAGCTGATTGGTGAAC-----    | mirL | 23 | 134   |
| -----CAGAGCTTAGCTGATTGGTGA-----      | mirL | 21 | 51    |
| -----CAGAGCTTAGCTGATTGGTGA-----      | mirL | 22 | 48    |
| -----GAGCTTAGCTGATTGGTGAAC-----      | mirL | 21 | 29    |
| -----CAGAGCTTAGCTGATTGGTGAACAG-----  | mirL | 25 | 20    |
| -----GAGCTTAGCTGATTGGTGAACA-----     | mirL | 22 | 17    |
| -----GCTTAGCTGATTGGTGAAC-----        | mirL | 19 | 11    |
| -----AGCTTAGCTGATTGGTGAACAGTGA-----  | mirL | 25 | 10    |
| -----AGCTTAGCTGATTGGTGAACAGT-----    | mirL | 23 | 7     |
| -----CAGAGCTTAGCTGATTGGTG-----       | mirL | 20 | 5     |
| -----AGCTTAGCTGATTGGTGA-----         | mirL | 19 | 3     |
| -----AGCTTAGCTGATTGGTGAACA-----      | mirL | 21 | 3     |
| -----GAGCTTAGCTGATTGGTGAACAG-----    | mirL | 23 | 2     |
| -----CAGAGCTTAGCTGATTGGTGAACAGT----- | mirL | 26 | 2     |
| -----GCAGAGCTTAGCTGATTG-----         | mirL | 18 | 1     |
| -----GAGCTTAGCTGATTGGTG-----         | mirL | 18 | 1     |
| -----AGCTTAGCTGATTGGTGAACAG-----     | mirL | 22 | 1     |

---

|                                     |      |    |       |
|-------------------------------------|------|----|-------|
| -----GAGCTTAGCTGATTGGTGAACAGT-----  | mirL | 24 | 1     |
| -----AGCTTAGCTGATTGGTGA-----        | mirL | 18 | 1     |
| -----GCTTAGCTGATTGGTGAACA-----      | mirL | 20 | 1     |
| -----GTGATTGGTTTCCGCTTTG-----       | loop | 19 | 166   |
| -----GTGATTGGTTTCCGCTTTGT-----      | loop | 20 | 13    |
| -----GTGATTGGTTTCCGCTTT-----        | loop | 18 | 6     |
| -----CAGTGATTGGTTTCCGCTTTGTT-----   | loop | 23 | 3     |
| -----AGTGATTGGTTTCCGCTTTGT-----     | loop | 21 | 2     |
| -----ATTGGTTTCCGCTTTGTT-----        | loop | 18 | 2     |
| -----CAGTGATTGGTTTCCGCTTT-----      | loop | 20 | 1     |
| -----GTGATTGGTTTCCGCTTTGTTC-----    | loop | 22 | 1     |
| -----AGTGATTGGTTTCCGCTTTG-----      | loop | 20 | 1     |
| -----TTCACAGTGGCTAAGTTCTGC-----     | mirR | 21 | 12045 |
| -----TTCACAGTGGCTAAGTTCTG-----      | mirR | 20 | 64414 |
| -----TTCACAGTGGCTAAGTTCTGCA-----    | mirR | 22 | 47313 |
| -----TTCACAGTGGCTAAGTTCTGCAC-----   | mirR | 23 | 44848 |
| -----TTCACAGTGGCTAAGTTCT-----       | mirR | 19 | 18157 |
| -----TCACAGTGGCTAAGTTCTGC-----      | mirR | 20 | 10020 |
| -----TTCACAGTGGCTAAGTTCTGCACC-----  | mirR | 24 | 9418  |
| -----TCACAGTGGCTAAGTTCTGCAC-----    | mirR | 22 | 4581  |
| -----GTTACAGTGGCTAAGTTCTGC-----     | mirR | 22 | 4327  |
| -----TCACAGTGGCTAAGTTCTG-----       | mirR | 19 | 4204  |
| -----TTCACAGTGGCTAAGTTCTGCACCT----- | mirR | 25 | 3323  |
| -----TCACAGTGGCTAAGTTCTGCA-----     | mirR | 21 | 2400  |
| -----GTTACAGTGGCTAAGTTCTG-----      | mirR | 21 | 1281  |
| -----TCACAGTGGCTAAGTTCT-----        | mirR | 18 | 1212  |
| -----TCACAGTGGCTAAGTTCTGCACC-----   | mirR | 23 | 903   |
| -----GTTACAGTGGCTAAGTTCTGCA-----    | mirR | 23 | 809   |
| -----GTTACAGTGGCTAAGTTCTGCAC-----   | mirR | 24 | 670   |
| -----TCACAGTGGCTAAGTTCTGCACCT-----  | mirR | 24 | 371   |
| -----GTTACAGTGGCTAAGTTCT-----       | mirR | 20 | 354   |
| -----GTTACAGTGGCTAAGTTCTGCACC-----  | mirR | 25 | 207   |
| -----CACAGTGGCTAAGTTCTGCAC-----     | mirR | 21 | 69    |
| -----CACAGTGGCTAAGTTCTGC-----       | mirR | 19 | 56    |
| -----GTTACAGTGGCTAAGTTCTGCACCT----- | mirR | 26 | 55    |
| -----CACAGTGGCTAAGTTCTGCACC-----    | mirR | 22 | 33    |
| -----CACAGTGGCTAAGTTCTG-----        | mirR | 18 | 30    |
| -----CACAGTGGCTAAGTTCTGCA-----      | mirR | 20 | 21    |
| -----CACAGTGGCTAAGTTCTGCACCT-----   | mirR | 23 | 20    |
| -----ACAGTGGCTAAGTTCTGC-----        | mirR | 18 | 20    |
| -----TTGTTACAGTGGCTAAGTTCT-----     | mirR | 22 | 12    |
| -----ACAGTGGCTAAGTTCTGCAC-----      | mirR | 20 | 12    |
| -----ACAGTGGCTAAGTTCTGCACC-----     | mirR | 21 | 5     |
| -----TTGTTACAGTGGCTAAGTTCTGC-----   | mirR | 24 | 3     |
| -----ACAGTGGCTAAGTTCTGCA-----       | mirR | 19 | 2     |
| -----TTGTTACAGTGGCTAAG-----         | mirR | 18 | 1     |

---

```

-----ACAGTGGCTAAGTTCTGCACCTG----- mirR 23 1
-----TG TTCACAGTGGCTAAGTTCTG----- mirR 22 1
-----TG TTCACAGTGGCTAAGTTCT----- mirR 21 1
-----TG TTCACAGTGGCTAAGTTCTGC----- mirR 23 1
-----CCTGAAGAGAAGGTGAGATGGGGACAG----- morR 27 13
-----ACCTGAAGAGAAGGTGAGATGGGGACAG----- morR 28 9
-----ACCTGAAGAGAAGGTGAGATGGGGA----- morR 25 8
-----ACCTGAAGAGAAGGTGAGATGGGGAC----- morR 26 4
-----GCACCTGAAGAGAAGGTG----- morR 18 4
-----ACCTGAAGAGAAGGTGAGATGGGGACAGT----- morR 29 3
-----ACCTGAAGAGAAGGTGAG----- morR 18 3
-----CCTGAAGAGAAGGTGAGA----- morR 18 2
-----ACCTGAAGAGAAGGTGAGA----- morR 19 2
-----TGCACCTGAAGAGAAGGT----- morR 18 2
-----ACCTGAAGAGAAGGTGAGATGGGGACAGTTAAC morR 33 1
-----CACCTGAAGAGAAGGTGAG----- morR 19 1
-----CCTGAAGAGAAGGTGAGATGGGGA----- morR 24 1

```

>mmu-mir-10a

| Species | len | reads  |
|---------|-----|--------|
| morL    | 20  | 35     |
| morL    | 19  | 17     |
| morL    | 21  | 8      |
| morL    | 18  | 4      |
| morL    | 19  | 4      |
| morL    | 18  | 2      |
| morL    | 19  | 2      |
| morL    | 20  | 1      |
| morL    | 18  | 1      |
| morL    | 20  | 1      |
| mirL    | 22  | 114351 |
| mirL    | 22  | 86344  |
| mirL    | 23  | 76296  |
| mirL    | 23  | 39071  |
| mirL    | 24  | 22348  |
| mirL    | 21  | 15813  |
| mirL    | 21  | 3163   |
| mirL    | 19  | 2049   |
| mirL    | 20  | 1158   |
| mirL    | 18  | 1118   |
| mirL    | 21  | 943    |
| mirL    | 23  | 920    |
| mirL    | 20  | 666    |
| mirL    | 22  | 528    |
| mirL    | 24  | 525    |
| mirL    | 25  | 463    |



```

-----ACCTGTAGATCCGAATT----- mirL 18 429
-----ATACCCTGTAGATCCGAATTTGTG----- mirL 24 288
-----ATACCCTGTAGATCCGAATTTG----- mirL 22 184
-----ATACCCTGTAGATCCGAATTTGTGT----- mirL 25 172
-----CCCTGTAGATCCGAATTTGT----- mirL 20 100
-----CCCTGTAGATCCGAATTTGTGTA----- mirL 23 60
-----CCTGTAGATCCGAATTTGTG----- mirL 20 38
-----ATACCCTGTAGATCCGAATT----- mirL 20 22
-----CCTGTAGATCCGAATTTGTGT----- mirL 21 18
-----ATACCCTGTAGATCCGAAT----- mirL 19 13
-----CCCTGTAGATCCGAATTTG----- mirL 19 13
-----ATACCCTGTAGATCCGAATTT----- mirL 21 9
-----CCCTGTAGATCCGAATTTGTGTAA----- mirL 24 8
-----CCTGTAGATCCGAATTTGT----- mirL 19 8
-----CCTGTAGATCCGAATTTGTGTA----- mirL 22 3
-----CCCTGTAGATCCGAATTTGTGTAAG----- mirL 26 1
-----TATACCCTGTAGATCCGAATTTGT----- mirL 24 1
-----TAAGGAATTTGTGGTCA----- loop 18 143
-----GTAAGGAATTTGTGGTCAC----- loop 20 34
-----TGTAAGGAATTTGTGGT----- loop 18 9
-----TAAGGAATTTGTGGTCAC----- loop 19 8
-----TGTAAGGAATTTGTGGTCACA----- loop 22 5
-----GTAAGGAATTTGTGGTCACAA----- loop 22 3
-----AAGGAATTTGTGGTCAC----- loop 18 3
-----GTAAGGAATTTGTGGTCACA----- loop 21 2
-----AGGAATTTGTGGTCACA----- loop 18 2
-----GTAAGGAATTTGTGGTCA----- loop 19 1
-----TGTAAGGAATTTGTGGTCACAA----- loop 23 1
-----TGTAAGGAATTTGTGGTCAC----- loop 21 1
-----TAAGGAATTTGTGGTCACAA----- loop 21 1
-----GTAAGGAATTTGTGGTC----- loop 18 1
-----CAAATTCGTATCTAGGGGAAT----- mirR 21 1039
-----CACAAATTCGTATCTAGGGGAA----- mirR 22 365
-----TCACAAATTCGTATCTAGGGGA----- mirR 22 292
-----CAAATTCGTATCTAGGGGAA----- mirR 20 268
-----CAAATTCGTATCTAGGGGAATA----- mirR 22 103
-----TCACAAATTCGTATCTAGGGGAA----- mirR 23 80
-----AAATTCGTATCTAGGGGAATA----- mirR 21 68
-----CACAAATTCGTATCTAGGGGA----- mirR 21 67
-----CAAATTCGTATCTAGGGGAATAT----- mirR 23 63
-----ACAAATTCGTATCTAGGGGAA----- mirR 21 53
-----CAAATTCGTATCTAGGGGA----- mirR 19 48
-----CACAAATTCGTATCTAGGGGAAT----- mirR 23 48
-----ACAAATTCGTATCTAGGGGA----- mirR 20 42
-----ACAAATTCGTATCTAGGGGAAT----- mirR 22 41
-----TCACAAATTCGTATCTAGGGG----- mirR 21 40

```

```

-----AAATTCGTATCTAGGGGAATAT----- mirR 22 31
-----AAATTCGTATCTAGGGGAAT----- mirR 20 28
-----CACAAATTCGTATCTAGGGGAATA----- mirR 24 21
-----AATTCGTATCTAGGGGAATAT----- mirR 21 15
-----CAAATTCGTATCTAGGGG----- mirR 18 8
-----TCACAAATTCGTATCTAGGGGAAT----- mirR 24 7
-----AAATTCGTATCTAGGGGAA----- mirR 19 6
-----ATTCGTATCTAGGGGAATA----- mirR 19 3
-----ACAAATTCGTATCTAGGGGAATA----- mirR 23 2
-----CAAATTCGTATCTAGGGGAATATG----- mirR 24 2
-----TCACAAATTCGTATCTAGGG----- mirR 20 1
-----AAATTCGTATCTAGGGGAATATG----- mirR 23 1
-----AAATTCGTATCTAGGGGA----- mirR 18 1
-----AATTCGTATCTAGGGGAATATG----- mirR 22 1
-----TCACAAATTCGTATCTAGG----- mirR 19 1
-----CACAAATTCGTATCTAGG----- mirR 18 1
-----ATTCGTATCTAGGGGAATAT----- mirR 20 1
-----AATTCGTATCTAGGGGAAT----- mirR 19 1
-----TGTAGTTGACATAAAACTC-- morR 20 2
-----TGTAGTTGACATAAAACTCCG morR 22 1
-----TATGTAGTTGACATAAAACT--- morR 21 1

```

>mmu-mir-93

```

TCTTGGACCTTAGTCATGGGGGCTCCAAAGTGCTGTTTCGTGCAGGTAGTGAATTACCTGACCTACTGCTGAGCTAGCACTTCCCAGCCCCAGGACACAACCTCTGATAGTGCCCTAGC species len read
-----ACCTTAGTCATGGGGGCTC----- morL 19 610
-----GACCTTAGTCATGGGGGCTC----- morL 20 236
-----ACCTTAGTCATGGGGGCTCC----- morL 20 95
-----CCTTAGTCATGGGGGCTC----- morL 18 89
-----ACCTTAGTCATGGGGGCT----- morL 18 47
-----GGACCTTAGTCATGGGGGCTC----- morL 21 21
-----GACCTTAGTCATGGGGGCTCC----- morL 21 20
-----TGGACCTTAGTCATGGGGGCTC----- morL 22 18
-----GACCTTAGTCATGGGGGCT----- morL 19 17
TCTTGGACCTTAGTCATGGGGGCTC----- morL 25 9
-----ACCTTAGTCATGGGGGCTCCA----- morL 21 7
-----CCTTAGTCATGGGGGCTCC----- morL 19 6
-----GACCTTAGTCATGGGGGCT----- morL 18 2
-----GGACCTTAGTCATGGGGGCT----- morL 20 2
-----TGGACCTTAGTCATGGGGGCTCCA----- morL 24 2
-----GGACCTTAGTCATGGGGGCT----- morL 19 2
-----ACCTTAGTCATGGGGGCTCCA----- morL 22 2
-----GACCTTAGTCATGGGGGCTCCA----- morL 22 2
-----TTGGACCTTAGTCATGGGGGCTC----- morL 23 1
-----CTTAGTCATGGGGGCTCC----- morL 18 1
-----CCTTAGTCATGGGGGCTCCA----- morL 20 1
-----CAAAGTGCTGTTTCGTGCAGGTAG----- mirL 23 232198

```

```

-----CAAAGTGCTGTTTCGTGCAGGTA----- mirL 22 38047
-----CAAAGTGCTGTTTCGTGCAGGTAGT----- mirL 24 33245
-----CAAAGTGCTGTTTCGTGCAGGT----- mirL 21 15341
-----CAAAGTGCTGTTTCGTGCAGGTAGTG----- mirL 25 5401
-----CAAAGTGCTGTTTCGTGCAG----- mirL 19 1918
-----CAAAGTGCTGTTTCGTGCAGG----- mirL 20 1279
-----AAAGTGCTGTTTCGTGCAGGTAG----- mirL 22 448
-----AAAGTGCTGTTTCGTGCAGGTA----- mirL 21 158
-----AGTGCTGTTTCGTGCAGGTAG----- mirL 20 91
-----AAGTGCTGTTTCGTGCAGGTAG----- mirL 21 86
-----AAAGTGCTGTTTCGTGCAGGTAGT----- mirL 23 82
-----CCAAAGTGCTGTTTCGTGCAGGTAG----- mirL 24 72
-----CCAAAGTGCTGTTTCGTGCAGGTA----- mirL 23 68
-----AGTGCTGTTTCGTGCAGGTA----- mirL 19 34
-----AAGTGCTGTTTCGTGCAGGTA----- mirL 20 33
-----AAAGTGCTGTTTCGTGCAGGTAGTG----- mirL 24 20
-----CCAAAGTGCTGTTTCGTGCAGGT----- mirL 22 19
-----CCAAAGTGCTGTTTCGTGCAGGTAGT----- mirL 25 17
-----AAAGTGCTGTTTCGTGCAGGT----- mirL 20 17
-----AAGTGCTGTTTCGTGCAGGTAGT----- mirL 22 11
-----AGTGCTGTTTCGTGCAGGTAGT----- mirL 21 8
-----AAGTGCTGTTTCGTGCAGGTAGTG----- mirL 23 5
-----AAGTGCTGTTTCGTGCAGGT----- mirL 19 4
-----AAAGTGCTGTTTCGTGCAG----- mirL 18 4
-----AAAGTGCTGTTTCGTGCAGG----- mirL 19 3
-----AAGTGCTGTTTCGTGCAGGTAGTGT----- mirL 24 3
-----AGTGCTGTTTCGTGCAGGTAGTG----- mirL 22 2
-----CCAAAGTGCTGTTTCGTGCAGG----- mirL 21 2
-----CCAAAGTGCTGTTTCGTGCAG----- mirL 20 2
-----CCAAAGTGCTGTTTCGTGCAGGTAGTG----- mirL 26 2
-----TCCAAAGTGCTGTTTCGTGCAGGTAG----- mirL 25 2
-----AGTGCTGTTTCGTGCAGGT----- mirL 18 2
-----AAGTGCTGTTTCGTGCAGG----- mirL 18 2
-----TCCAAAGTGCTGTTTCGTGCAGGT----- mirL 23 1
-----CTCCAAAGTGCTGTTTCGTGCAGGTAGT----- mirL 27 1
-----TCCAAAGTGCTGTTTCGTGCAGGTA----- mirL 24 1
-----CTCCAAAGTGCTGTTTCGT----- mirL 18 1
-----CTCCAAAGTGCTGTTTCGTGCAGGTAG----- mirL 26 1
-----GTGTAATTACCTGACCTA----- loop 18 6
-----TGTAATTACCTGACCTAC----- loop 18 2
-----GTGTAATTACCTGACCTAC----- loop 19 1
-----ACTGCTGAGCTAGCACTTCCCGA----- mirR 23 21276
-----ACTGCTGAGCTAGCACTTCCCG----- mirR 22 5387
-----ACTGCTGAGCTAGCACTTCCCGAG----- mirR 24 3655
-----ACTGCTGAGCTAGCACTTCC----- mirR 20 1216
-----ACTGCTGAGCTAGCACTTCCC----- mirR 21 1200

```

```

-----ACTGCTGAGCTAGCACTTCCCGAGC----- mirR 25 810
-----CTGCTGAGCTAGCACTTCCCGA----- mirR 22 601
-----ACTGCTGAGCTAGCACTTC----- mirR 19 120
-----CTGCTGAGCTAGCACTTCCCGAG----- mirR 23 103
-----CTGCTGAGCTAGCACTTCCCGAGC----- mirR 24 56
-----CTACTGCTGAGCTAGCACTTCCC----- mirR 23 40
-----TACTGCTGAGCTAGCACTTCC----- mirR 21 30
-----TACTGCTGAGCTAGCACTTCCCGA----- mirR 24 25
-----CTACTGCTGAGCTAGCACTTCC----- mirR 22 25
-----TACTGCTGAGCTAGCACTTCCC----- mirR 22 25
-----CTGCTGAGCTAGCACTTCCCG----- mirR 21 24
-----TACTGCTGAGCTAGCACTTCCCGAG----- mirR 25 22
-----TACTGCTGAGCTAGCACTTCCC----- mirR 23 19
-----CCTACTGCTGAGCTAGCACTTCCCGA----- mirR 26 15
-----TGCTGAGCTAGCACTTCCCGA----- mirR 21 14
-----CTGCTGAGCTAGCACTTCC----- mirR 19 12
-----GCTGAGCTAGCACTTCCCG----- mirR 19 11
-----GCTGAGCTAGCACTTCCCGA----- mirR 20 11
-----CTGCTGAGCTAGCACTTCCCGAGCCC----- mirR 26 9
-----CTGCTGAGCTAGCACTTCCCGAGCC----- mirR 25 6
-----TACTGCTGAGCTAGCACTTC----- mirR 20 5
-----CTACTGCTGAGCTAGCACTTCCCG----- mirR 24 3
-----TACTGCTGAGCTAGCACTTCCCGAGCC----- mirR 27 2
-----CTACTGCTGAGCTAGCACTTCCCGAG----- mirR 26 2
-----CTACTGCTGAGCTAGCACTTCCCGA----- mirR 25 2
-----CTACTGCTGAGCTAGCACTTC----- mirR 21 2
-----TGCTGAGCTAGCACTTCCCGAGCC----- mirR 24 2
-----GCTGAGCTAGCACTTCCC----- mirR 18 1
-----CCTACTGCTGAGCTAGCAC----- mirR 19 1
-----CCTACTGCTGAGCTAGCACTTCC----- mirR 23 1
-----TGCTGAGCTAGCACTTCCC----- mirR 19 1
-----TGCTGAGCTAGCACTTCC----- mirR 18 1
-----GCCCCCAGGACACAACCTCTGATAGTGGCCC----- morR 31 35
-----GCCCCCAGGACACAACCTCTGA----- morR 22 28
-----GCCCCCAGGACACAACCTCTGATAGTGGC----- morR 29 25
-----GCCCCCAGGACACAACCTCTGATAGTGGCCCTAGC morR 35 21
-----GCCCCCAGGACACAACCTCTGATAGTGGCC----- morR 30 18
-----GCCCCCAGGACACAACCTCTGATAGTGG----- morR 28 14
-----GCCCCCAGGACACAACCTCTGATA----- morR 24 9
-----CCCCCAGGACACAACCTCTGATAGTGGCCC----- morR 30 7
-----GAGCCCCCAGGACACAAC----- morR 18 4
-----CGAGCCCCCAGGACACAA----- morR 18 2
-----CCCCCAGGACACAACCTCTGATAGTGGCCCTAGC morR 34 2
-----CCCCCAGGACACAACCTC----- morR 18 2
-----CCCAGGACACAACCTCTG----- morR 18 2
-----CCCCAGGACACAACCTCT----- morR 18 1

```

```

-----AGCCCCAGGACACAACC----- morR 18 1
-----CGAGCCCCAGGACACAAC----- morR 19 1
-----CCCCAGGACACAACCTCTGATAGTGGCCCT-- morR 31 1
-----CCCCAGGACACAACCTCTGATAGTG----- morR 26 1
-----CCCCAGGACACAACCTCTGATAGTGGC----- morR 28 1
-----CCCCAGGACACAACCTCT----- morR 19 1

>mmu-mir-92b
TAGGGAGCGGGATTCCAGAGCCCCGGGTGGGCGGGAGGGACGGGACGTGGTGCAGTGTGTTCTTTCCCTGCCAATATTGCACTCGTCCCGGCCTCCGGCCCCCTCGGCCCCCGGGCGCCCCCTCAC species le
-----CCCCGGGTGGGCGGGAGG----- morL 18 3
-----CCAGAGCCCCGGGTGGGC----- morL 18 2
-----CCAGAGCCCCGGGTGGGCG----- morL 19 1
TAGGGAGCGGGATTCCAGAGCCCCGGGTGGGCGGG----- morL 35 1
-----AGAGCCCCGGGTGGGCGGGA----- morL 20 1
-----GAGCCCCGGGTGGGCGGGA----- morL 19 1
-----CAGAGCCCCGGGTGGGCGG----- morL 19 1
-----GGGATTCCAGAGCCCCGGGTGGGCGGGAG----- morL 29 1
-----AGGGACGGGACGTGGTGCAGTGT----- mirL 24 111
-----AGGGACGGGACGTGGTGCAGTGTG----- mirL 25 437
-----AGGGACGGGACGTGGTGCAGTGT----- mirL 23 433
-----AGGGACGGGACGTGGTGCAGTGTGTT----- mirL 26 380
-----GGGACGGGACGTGGTGCAGTGTGTT----- mirL 25 965
-----AGGGACGGGACGTGGTGCAGTGTGTT----- mirL 27 909
-----GGGACGGGACGTGGTGCAGTGTG----- mirL 24 450
-----AGGGACGGGACGTGGTGCAGTGTGTTTC----- mirL 28 410
-----AGGGACGGGACGTGGTGCAGTG----- mirL 22 371
-----GACGGGACGTGGTGCAGTGTG----- mirL 22 199
-----GGGACGGGACGTGGTGCAGTGT----- mirL 23 127
-----GACGGGACGTGGTGCAGTGTGTT----- mirL 23 104
-----GGGACGGGACGTGGTGCAGTGTGTT----- mirL 26 72
-----GACGGGACGTGGTGCAGTGT----- mirL 21 42
-----GGGACGGGACGTGGTGCAGTGT----- mirL 22 40
-----GGGACGGGACGTGGTGCAGTGTGTTTC----- mirL 27 32
-----GACGGGACGTGGTGCAGTGTGTT----- mirL 24 7
-----GGGACGGGACGTGGTGCAG----- mirL 19 6
-----GACGGGACGTGGTGCAGTGT----- mirL 20 3
-----GGACGGGACGTGGTGCAGTGT----- mirL 22 3
-----GGACGGGACGTGGTGCAG----- mirL 18 2
-----GGACGGGACGTGGTGCAGTGTG----- mirL 23 1
-----GAGGGACGGGACGTGGT----- mirL 18 1
-----GACGGGACGTGGTGCAGTG----- mirL 19 1
-----GGACGGGACGTGGTGCAGTGTGTT----- mirL 24 1
-----GGAGGGACGGGACGTGGT----- mirL 18 1
-----GAGGGACGGGACGTGGTGCAGTGT----- mirL 25 1
-----GACGGGACGTGGTGCAGT----- mirL 18 1
-----GTTCTTTCCCTGCCAAT----- loop 18 18

```

```

-----TTCTTTCCCTGCCAATA----- loop 18 1
-----TTGTTCTTTCCCTGCCA----- loop 18 1
-----TATTGCACTCGTCCCGGCCTCC----- mirR 22 151
-----TATTGCACTCGTCCCGGCCTCCG----- mirR 23 620
-----TATTGCACTCGTCCCGGCCTCCGG----- mirR 24 398
-----TATTGCACTCGTCCCGGCCTC----- mirR 21 282
-----TATTGCACTCGTCCCGGCCTCCGGC----- mirR 25 225
-----TATTGCACTCGTCCCGGCCT----- mirR 20 654
-----ATTGCACTCGTCCCGGCCTCC----- mirR 21 576
-----TATTGCACTCGTCCCGGCCTCCGGC----- mirR 26 555
-----ATTGCACTCGTCCCGGCCTCCG----- mirR 22 355
-----ATTGCACTCGTCCCGGCCTCCGG----- mirR 23 220
-----ATTGCACTCGTCCCGGCCTC----- mirR 20 164
-----ATTGCACTCGTCCCGGCCTCCGGC----- mirR 24 777
-----ATATTGCACTCGTCCCGGCCTCC----- mirR 23 563
-----ATTGCACTCGTCCCGGCCT----- mirR 19 549
-----ATATTGCACTCGTCCCGGCCTCCG----- mirR 24 502
-----ATTGCACTCGTCCCGGCCTCCGGC----- mirR 25 280
-----ATATTGCACTCGTCCCGGCCTCCGG----- mirR 25 209
-----ATATTGCACTCGTCCCGGCCTC----- mirR 22 137
-----ATATTGCACTCGTCCCGGCCTCCGGC----- mirR 26 114
-----ATATTGCACTCGTCCCGGCCT----- mirR 21 36
-----TGCACCTCGTCCCGGCCTC----- mirR 18 31
-----ATATTGCACTCGTCCCGGCCTCCGGCC----- mirR 27 28
-----TTGCACTCGTCCCGGCCTCC----- mirR 20 28
-----TGCACCTCGTCCCGGCCTCC----- mirR 19 26
-----TTGCACTCGTCCCGGCCTC----- mirR 19 17
-----AATATTGCACTCGTCCCGGCCTCC----- mirR 24 14
-----CAATATTGCACTCGTCCCGGCCTCC----- mirR 25 10
-----AATATTGCACTCGTCCCGGCCTCCG----- mirR 25 9
-----AATATTGCACTCGTCCCGGCCT----- mirR 22 8
-----TTGCACTCGTCCCGGCCTCCG----- mirR 21 8
-----TGCACCTCGTCCCGGCCTCCGG----- mirR 21 3
-----TTGCACTCGTCCCGGCCTCCGG----- mirR 22 3
-----TTGCACTCGTCCCGGCCTCCGGC----- mirR 23 3
-----TGCACCTCGTCCCGGCCTCCG----- mirR 20 2
-----AATATTGCACTCGTCCCG----- mirR 18 1
-----TTGCACTCGTCCCGGCCT----- mirR 18 1
-----CAATATTGCACTCGTCCCG----- mirR 18 1
-----TGCACCTCGTCCCGGCCTCCGGCCCC----- mirR 25 1
-----TGCACCTCGTCCCGGCCTCCGGCC----- mirR 23 1
-----CGGCCCCCTCGGCCCCC----- morR 18 104
-----CCCCCTCGGCCCCCGGCGC----- morR 21 6
-----GGCCCCCTCGGCCCCCGGCGCCCCCTCAC----- morR 31 4
-----GGCCCCCTCGGCCCCCGGCGCC----- morR 25 3
-----GGCCCCCTCGGCCCCC----- morR 18 2

```

```

-----GCCCCCTCGGCCCCCG----- morR 18 2
-----GGCCCCCTCGGCCCCCGCGCCCTCA- morR 30 1
-----TCGGCCCCCTCGGCCCC- morR 18 1
-----CCGGCCCCCTCGGCCCC- morR 18 1
-----GCCCCCTCGGCCCCCGG----- morR 19 1
-----CGGCCCCCTCGGCCCCCG----- morR 19 1
-----GGCCCCCTCGGCCCCCG----- morR 19 1
-----CGGCCCCCTCGGCCCCCG----- morR 20 1

```

>mmu-mir-143

| GCCTGCGTGCGGAGCGCCTGTCTCCCAGCCTGAGGTGCAGTGCATCTCTGGTCAGTTGGGAGTCTGAGATGAAGCACTGTAGCTCAGGAAGGAGAGAAGATGTCCTGCAGCCGTACC | species | len | reads  |
|-----------------------------------------------------------------------------------------------------------------------|---------|-----|--------|
| -----GCGCCTGTCTCCCAGCCTGA-----                                                                                        | morL    | 20  | 21     |
| GCCTGCGTGCGGAGCGCCTGTCTCCCAGCCTGA-----                                                                                | morL    | 33  | 20     |
| -----GCGCCTGTCTCCCAGCCTGA-----                                                                                        | morL    | 18  | 16     |
| -----GTGCGGAGCGCCTGTCTCCCAGCCTGA-----                                                                                 | morL    | 27  | 7      |
| -----GCGCCTGTCTCCCAGCCTGA-----                                                                                        | morL    | 19  | 4      |
| -----AGCGCCTGTCTCCCAGCCTGA-----                                                                                       | morL    | 21  | 3      |
| -----GCGCCTGTCTCCCAGCCT-----                                                                                          | morL    | 18  | 2      |
| -----CTGTCTCCCAGCCTGAGG-----                                                                                          | morL    | 18  | 2      |
| -----CCTGTCTCCCAGCCTGAGG-----                                                                                         | morL    | 19  | 1      |
| -----GAGCGCCTGTCTCCCAGCCTGA-----                                                                                      | morL    | 22  | 1      |
| -----CCTGTCTCCCAGCCTGAG-----                                                                                          | morL    | 18  | 1      |
| -----GGTGCAGTGCTGCATCTCTGG-----                                                                                       | mirL    | 21  | 734    |
| -----GGTGCAGTGCTGCATCTCTGGTC-----                                                                                     | mirL    | 23  | 254    |
| -----GGTGCAGTGCTGCATCTCTGGT-----                                                                                      | mirL    | 22  | 222    |
| -----GGTGCAGTGCTGCATCTCTGGTCA-----                                                                                    | mirL    | 24  | 203    |
| -----GGTGCAGTGCTGCATCTCTGGTCAG-----                                                                                   | mirL    | 25  | 52     |
| -----GGTGCAGTGCTGCATCTCTG-----                                                                                        | mirL    | 20  | 18     |
| -----AGGTGCAGTGCTGCATCTCTGG-----                                                                                      | mirL    | 22  | 16     |
| -----GGTGCAGTGCTGCATCTCTGGTCAGT-----                                                                                  | mirL    | 26  | 13     |
| -----TGCAGTGCTGCATCTCTGGTC-----                                                                                       | mirL    | 21  | 1      |
| -----AGGTGCAGTGCTGCATCTCTG-----                                                                                       | mirL    | 21  | 1      |
| -----GCAGTGCTGCATCTCTGGTC-----                                                                                        | mirL    | 20  | 1      |
| -----TGAGGTGCAGTGCTGCATC-----                                                                                         | mirL    | 19  | 1      |
| -----GAGGTGCAGTGCTGCATCTC-----                                                                                        | mirL    | 20  | 1      |
| -----TGAGATGAAGCACTGTAGCTC-----                                                                                       | mirR    | 21  | 120469 |
| -----TGAGATGAAGCACTGTAGCTCA-----                                                                                      | mirR    | 22  | 119268 |
| -----TGAGATGAAGCACTGTAGCT-----                                                                                        | mirR    | 20  | 39640  |
| -----TGAGATGAAGCACTGTAGCTCAG-----                                                                                     | mirR    | 23  | 21082  |
| -----GAGATGAAGCACTGTAGCTCA-----                                                                                       | mirR    | 21  | 8944   |
| -----GAGATGAAGCACTGTAGCTC-----                                                                                        | mirR    | 20  | 6700   |
| -----TGAGATGAAGCACTGTAGCTCAGG-----                                                                                    | mirR    | 24  | 6401   |
| -----TGAGATGAAGCACTGTAG-----                                                                                          | mirR    | 18  | 6060   |
| -----TGAGATGAAGCACTGTAGC-----                                                                                         | mirR    | 19  | 4906   |
| -----GAGATGAAGCACTGTAGCT-----                                                                                         | mirR    | 19  | 1984   |
| -----GAGATGAAGCACTGTAGCTCAG-----                                                                                      | mirR    | 22  | 1830   |

```

-----CTGAGATGAAGCACTGTAGCTC----- mirR 22 1720
-----CTGAGATGAAGCACTGTAGCTCA----- mirR 23 1158
-----CTGAGATGAAGCACTGTAGCT----- mirR 21 888
-----GAGATGAAGCACTGTAGCTCAGG----- mirR 23 397
-----GAGATGAAGCACTGTAGC----- mirR 18 286
-----CTGAGATGAAGCACTGTAGC----- mirR 20 239
-----CTGAGATGAAGCACTGTAGCTCAG----- mirR 24 214
-----CTGAGATGAAGCACTGTAG----- mirR 19 132
-----CTGAGATGAAGCACTGTAGCTCAGG----- mirR 25 109
-----GATGAAGCACTGTAGCTCAGGAA----- mirR 23 76
-----GAGATGAAGCACTGTAGCTCAGGA----- mirR 24 52
-----AGATGAAGCACTGTAGCTCA----- mirR 20 36
-----TCTGAGATGAAGCACTGTAGCTC----- mirR 23 33
-----GATGAAGCACTGTAGCTC----- mirR 18 28
-----GATGAAGCACTGTAGCTCA----- mirR 19 26
-----AGATGAAGCACTGTAGCTC----- mirR 19 22
-----GATGAAGCACTGTAGCTCAGGA----- mirR 22 20
-----GATGAAGCACTGTAGCTCAGGAA----- mirR 24 19
-----TCTGAGATGAAGCACTGTAGCTCA----- mirR 24 12
-----AGATGAAGCACTGTAGCT----- mirR 18 11
-----GATGAAGCACTGTAGCTCAG----- mirR 20 11
-----TCTGAGATGAAGCACTGTAGCT----- mirR 22 11
-----TCTGAGATGAAGCACTGTAG----- mirR 20 10
-----AGATGAAGCACTGTAGCTCAG----- mirR 21 7
-----GTCTGAGATGAAGCACTGT----- mirR 19 5
-----GTCTGAGATGAAGCACTGTA----- mirR 20 5
-----GATGAAGCACTGTAGCTCAGGAAG----- mirR 25 4
-----TCTGAGATGAAGCACTGTAGCTCAG----- mirR 25 2
-----GTCTGAGATGAAGCACTGTAGCT----- mirR 23 1
-----TCTGAGATGAAGCACTGTA----- mirR 19 1
-----GTCTGAGATGAAGCACTGTAGCTC----- mirR 24 1
-----AGATGAAGCACTGTAGCTCAGG----- mirR 22 1
-----GTCTGAGATGAAGCACTG----- mirR 18 1
-----AGGAAGGGAGAAGATGTCCT----- morR 20 9
-----AGGAAGGGAGAAGATGTCCTGCAGCCGTCACC morR 32 8
-----AGGAAGGGAGAAGATGTCCTGCAGCCGTCAC morR 31 7
-----AGGAAGGGAGAAGATGTCCTGCAGC----- morR 25 4
-----AGGAAGGGAGAAGATGTCCTG----- morR 21 3
-----AAGGGAGAAGATGTCCTG----- morR 18 2
-----AGGAAGGGAGAAGATGTC----- morR 18 1
-----AGGAAGGGAGAAGATGTCCTGCAGCCGTCA-- morR 30 1
-----GAAGGGAGAAGATGTCCTG----- morR 19 1
-----GGAAGGGAGAAGATGTCC----- morR 18 1

```

>mmu-mir-25

CACCCACCGGACTGGCCAGTGTGAGAGGCGGAGACTTGGGCAATTGCTGGACCTGCCCTGGGCATTGCACTTGTCTCGGTCTGACAGTGCCGCCAACACTGCAGATGTGGGGGGGC species len reads



---

|                                        |      |    |        |
|----------------------------------------|------|----|--------|
| -----CGGGACTGGCCAGTGTGAG-----          | morL | 20 | 275    |
| -----CCGGGACTGGCCAGTGTGAG-----         | morL | 21 | 64     |
| -----GGGACTGGCCAGTGTGAG-----           | morL | 19 | 45     |
| -----CGGGACTGGCCAGTGTGAGA-----         | morL | 21 | 18     |
| -----CCGGGACTGGCCAGTGTGAGA-----        | morL | 22 | 9      |
| -----ACCGGGACTGGCCAGTGTGAG-----        | morL | 22 | 9      |
| -----CCGGGACTGGCCAGTGTGAG-----         | morL | 20 | 8      |
| -----CGGGACTGGCCAGTGTGAG-----          | morL | 18 | 8      |
| -----GGACTGGCCAGTGTGAG-----            | morL | 18 | 7      |
| -----ACCGGGACTGGCCAGTGTGAGA-----       | morL | 23 | 5      |
| -----ACCCACCGGGACTGGCCAGTGTGAG-----    | morL | 26 | 5      |
| -----CGGGACTGGCCAGTGTGAG-----          | morL | 19 | 3      |
| CACCCACCGGGACTGGCCAGTGTGAG-----        | morL | 27 | 3      |
| -----ACCGGGACTGGCCAGTGTGAG-----        | morL | 20 | 1      |
| -----CCGGGACTGGCCAGTGTGAG-----         | morL | 19 | 1      |
| -----GGACTGGCCAGTGTGAGA-----           | morL | 19 | 1      |
| -----GGGACTGGCCAGTGTGAGA-----          | morL | 20 | 1      |
| -----CGGGACTGGCCAGTGTGAGAG-----        | morL | 22 | 1      |
| -----CCGGGACTGGCCAGTGTGAG-----         | morL | 18 | 1      |
| -----GGGACTGGCCAGTGTGAGAG-----         | morL | 21 | 1      |
| -----AGGCGGAGACTTGGGCAATTGCT-----      | mirL | 23 | 2928   |
| -----AGGCGGAGACTTGGGCAATTG-----        | mirL | 21 | 842    |
| -----AGGCGGAGACTTGGGCAATTGCTG-----     | mirL | 24 | 836    |
| -----AGGCGGAGACTTGGGCAATTGCT-----      | mirL | 22 | 368    |
| -----AGGCGGAGACTTGGGCAATT-----         | mirL | 20 | 294    |
| -----AGGCGGAGACTTGGGCAATTGCTGG-----    | mirL | 25 | 163    |
| -----AGGCGGAGACTTGGGCAATT-----         | mirL | 19 | 78     |
| -----GGCGGAGACTTGGGCAATTGCT-----       | mirL | 22 | 23     |
| -----GGCGGAGACTTGGGCAATTGCTG-----      | mirL | 23 | 7      |
| -----GGCGGAGACTTGGGCAATTGCTGG-----     | mirL | 24 | 6      |
| -----GGCGGAGACTTGGGCAATTG-----         | mirL | 20 | 6      |
| -----CGGAGACTTGGGCAATTG-----           | mirL | 18 | 3      |
| -----GGCGGAGACTTGGGCAATTGCTGGACGC----- | mirL | 28 | 2      |
| -----GAGGCGGAGACTTGGGCAATTGCTG-----    | mirL | 25 | 1      |
| -----CGGAGACTTGGGCAATTGCT-----         | mirL | 20 | 1      |
| -----GAGGCGGAGACTTGGGCA-----           | mirL | 18 | 1      |
| -----AGAGGCGGAGACTTGGGCAATTGCT-----    | mirL | 25 | 1      |
| -----GCGGAGACTTGGGCAATTG-----          | mirL | 19 | 1      |
| -----GCGGAGACTTGGGCAATTGCT-----        | mirL | 20 | 1      |
| -----TGGACGCTGCCCTGGGCA-----           | loop | 18 | 1      |
| -----CATTGCACTTGTCTCGGTCTGA-----       | mirR | 22 | 248696 |
| -----CATTGCACTTGTCTCGGTCTG-----        | mirR | 21 | 33189  |
| -----CATTGCACTTGTCTCGGTCTGAC-----      | mirR | 23 | 19359  |
| -----CATTGCACTTGTCTCGGTCT-----         | mirR | 20 | 17772  |
| -----CATTGCACTTGTCTCGGTCTGACA-----     | mirR | 24 | 4921   |
| -----CATTGCACTTGTCTCGGTCT-----         | mirR | 19 | 1304   |

```

-----CATTGCACTTGTCTCGGT----- mirR 18 997
-----ATTGCACTTGTCTCGGTCTGA----- mirR 21 535
-----ATTGCACTTGTCTCGGTCTGAC----- mirR 22 94
-----ATTGCACTTGTCTCGGTCTG----- mirR 20 62
-----TGCACCTTGTCTCGGTCTGA----- mirR 19 52
-----ATTGCACTTGTCTCGGTCT----- mirR 19 40
-----GCATTGCACTTGTCTCGGTCTGA----- mirR 23 31
-----TTGCACTTGTCTCGGTCTGACA----- mirR 22 17
-----TTGCACTTGTCTCGGTCTGA----- mirR 20 11
-----GCATTGCACTTGTCTCGGTCTG----- mirR 22 11
-----ATTGCACTTGTCTCGGTCTGACA----- mirR 23 8
-----ATTGCACTTGTCTCGGTCT----- mirR 18 8
-----TGCACCTTGTCTCGGTCTG----- mirR 18 8
-----TTGCACTTGTCTCGGTCTG----- mirR 19 7
-----GCATTGCACTTGTCTCGGTCTGACA----- mirR 25 6
-----GGGCATTGCACTTGTCTCGGTCTGA----- mirR 25 5
-----GCATTGCACTTGTCTCGGTCT----- mirR 21 5
-----GCATTGCACTTGTCTCGGTCTGAC----- mirR 24 4
-----GCATTGCACTTGTCTCGG----- mirR 18 2
-----GGCATTGCACTTGTCTCGGTCTGA----- mirR 24 2
-----TGCACCTTGTCTCGGTCTGACA----- mirR 21 1
-----TTGCACTTGTCTCGGTCT----- mirR 18 1
-----GCATTGCACTTGTCTCGGT----- mirR 19 1
-----TGCACCTTGTCTCGGTCTGAC----- mirR 20 1
-----GGGCATTGCACTTGTCTC----- mirR 18 1
-----TTGCACTTGTCTCGGTCTGAC----- mirR 21 1
-----CAGTGCCGGCCCAACTGCAG----- morR 22 3
-----CAGTGCCGGCCCAACTGCAGATGTGGGGGGG morR 34 2
-----CAGTGCCGGCCCAACTGCA----- morR 21 1
-----CAGTGCCGGCCCAACTGC----- morR 20 1
-----AGTGCCGGCCCAACTG----- morR 18 1
-----CAGTGCCGGCCCAACTG----- morR 19 1
-----TGACAGTGCCGGCCCAACAC----- morR 20 1

```

>mmu-mir-7a-1

```

CATTGGATGTTGGCCTAGTTCTGTGTGGAAGACTAGTGATTTTGTGTTTTAGATAACTAAAACGACAACAAATCACAGTCTGCCATATGGCACAGGCCACCTCTACAGGAC species len reads
-----ATGTTGGCCTAGTTCTGTG----- morL 19 47
-----GGATGTTGGCCTAGTTCTGTG----- morL 21 22
-----TGGATGTTGGCCTAGTTCTGTG----- morL 22 15
-----ATGTTGGCCTAGTTCTGTGT----- morL 20 9
-----GATGTTGGCCTAGTTCTGTG----- morL 20 8
-----TTGGCCTAGTTCTGTGTG----- morL 18 7
-----TGGCCTAGTTCTGTGTGG----- morL 18 3
-----GGATGTTGGCCTAGTTCTGTGT----- morL 22 2
CATTGGATGTTGGCCTAGTTCTGTG----- morL 25 2
-----GTTGGCCTAGTTCTGTGTG----- morL 19 2

```

---

|                                     |                |
|-------------------------------------|----------------|
| -----TGTGGCCTAGTTCTGTG-----         | morL 18 1      |
| --TTGGATGTTGGCCTAGTTCTGTG-----      | morL 23 1      |
| CATTGGATGTTGGCCTAGTTCTGTGTT-----    | morL 26 1      |
| -----ATGTTGGCCTAGTTCTGT-----        | morL 18 1      |
| ---TGGATGTTGGCCTAGTTCTGT-----       | morL 21 1      |
| -ATTGGATGTTGGCCTAGTTCTG-----        | morL 22 1      |
| -----GTTGGCCTAGTTCTGTGT-----        | morL 18 1      |
| ---TGGATGTTGGCCTAGTTCTG-----        | morL 20 1      |
| -----TGTGGCCTAGTTCTGTGT-----        | morL 19 1      |
| -----TGGAAGACTAGTGATTTTGTGTT-----   | mirL 24 191633 |
| -----TGGAAGACTAGTGATTTTGTGTT-----   | mirL 23 43914  |
| -----TGGAAGACTAGTGATTTTGTGTT-----   | mirL 25 15846  |
| -----TGGAAGACTAGTGATTTTGTGTT-----   | mirL 22 10717  |
| -----GGAAGACTAGTGATTTTGTGTT-----    | mirL 23 8038   |
| -----TGGAAGACTAGTGATTTTGTGTT-----   | mirL 26 5957   |
| -----TGGAAGACTAGTGATTTTGTGTT-----   | mirL 27 2289   |
| -----TGGAAGACTAGTGATTTTGTGTT-----   | mirL 21 1948   |
| -----GGAAGACTAGTGATTTTGTGTT-----    | mirL 22 1725   |
| -----GGAAGACTAGTGATTTTGTGTT-----    | mirL 24 483    |
| -----GGAAGACTAGTGATTTTGTGTT-----    | mirL 21 378    |
| -----GGAAGACTAGTGATTTTGTGTT-----    | mirL 25 186    |
| -----GGAAGACTAGTGATTTTGTGTT-----    | mirL 26 93     |
| -----AAGACTAGTGATTTTGTGTT-----      | mirL 21 92     |
| -----GAAGACTAGTGATTTTGTGTT-----     | mirL 22 60     |
| -----GGAAGACTAGTGATTTTGTGTT-----    | mirL 20 60     |
| -----GTGGAAGACTAGTGATTTTGTGTT-----  | mirL 25 26     |
| -----AAGACTAGTGATTTTGTGTT-----      | mirL 20 17     |
| -----GAAGACTAGTGATTTTGTGTT-----     | mirL 19 9      |
| -----GTGGAAGACTAGTGATTTTGTGTT-----  | mirL 22 6      |
| -----GAAGACTAGTGATTTTGTGTT-----     | mirL 21 5      |
| -----GTGGAAGACTAGTGATTTTGTGTT-----  | mirL 20 5      |
| -----TGTGGAAGACTAGTGATTTTGTGTT----- | mirL 23 5      |
| -----GAAGACTAGTGATTTTGTGTT-----     | mirL 23 4      |
| -----GTGGAAGACTAGTGATTTTGTGTT-----  | mirL 24 3      |
| -----GTGGAAGACTAGTGATTT-----        | mirL 18 3      |
| -----GAAGACTAGTGATTTTGTGTT-----     | mirL 20 2      |
| -----AAGACTAGTGATTTTGTGTT-----      | mirL 22 2      |
| -----GAAGACTAGTGATTTTGTGTT-----     | mirL 25 1      |
| -----AAGACTAGTGATTTTGTGTT-----      | mirL 18 1      |
| -----TGTGGAAGACTAGTGATTTTGTGTT----- | mirL 27 1      |
| -----GTGGAAGACTAGTGATTTTGTGTT-----  | mirL 26 1      |
| -----AAGACTAGTGATTTTGTGTT-----      | mirL 19 1      |
| -----TGTGGAAGACTAGTGATTT-----       | mirL 19 1      |
| -----TTTTTAGATAACTAAAAC-----        | loop 18 9      |
| -----GTTTTTAGATAACTAAAAC-----       | loop 19 7      |
| -----GTTTTTAGATAACTAAAAC-----       | loop 18 3      |

```

-----TTTTTAGATAACTAAAACG----- loop 19 1
-----TTAGATAACTAAAACGAC----- loop 18 1
-----CAACAAATCACAGTCTGCCATA----- mirR 22 25476
-----CAACAAATCACAGTCTGCCAT----- mirR 21 3383
-----AACAAATCACAGTCTGCCATA----- mirR 21 1866
-----CAACAAATCACAGTCTGCCATAT----- mirR 23 1375
-----ACAACAAATCACAGTCTGCCAT----- mirR 22 1235
-----CAACAAATCACAGTCTGCCA----- mirR 20 522
-----AACAAATCACAGTCTGCCATAT----- mirR 22 376
-----AACAAATCACAGTCTGCCAT----- mirR 20 356
-----GACAACAAATCACAGTCTGCCATA----- mirR 24 129
-----CAACAAATCACAGTCTGCCATATG----- mirR 24 93
-----ACAACAAATCACAGTCTGCCA----- mirR 21 92
-----ACAAATCACAGTCTGCCATAT----- mirR 21 91
-----GACAACAAATCACAGTCTGCCAT----- mirR 23 75
-----CAACAAATCACAGTCTGCC----- mirR 19 68
-----ACAAATCACAGTCTGCCATA----- mirR 20 67
-----CAACAAATCACAGTCTGC----- mirR 18 62
-----GACAACAAATCACAGTCTGCCA----- mirR 22 39
-----CGACAACAAATCACAGTCTGCCA----- mirR 23 38
-----CGACAACAAATCACAGTCTGCCATA----- mirR 25 38
-----AACAAATCACAGTCTGCCA----- mirR 19 37
-----CAAATCACAGTCTGCCATA----- mirR 19 31
-----GACAACAAATCACAGTCTGCCATAT----- mirR 25 25
-----ACAACAAATCACAGTCTGCCATA----- mirR 23 20
-----CGACAACAAATCACAGTCTGCCAT----- mirR 24 20
-----GACAACAAATCACAGTCTGCCATATGG----- mirR 27 17
-----ACAAATCACAGTCTGCCATATG----- mirR 22 14
-----ACAACAAATCACAGTCTGC----- mirR 19 14
-----AACAAATCACAGTCTGCC----- mirR 18 12
-----CGACAACAAATCACAGTCTGC----- mirR 21 11
-----CGACAACAAATCACAGTCTGCC----- mirR 22 11
-----CGACAACAAATCACAGTCTGCCATATG----- mirR 27 10
-----ACAAATCACAGTCTGCCAT----- mirR 19 8
-----CAAATCACAGTCTGCCAT----- mirR 18 7
-----ACAACAAATCACAGTCTGCCATAT----- mirR 24 4
-----CGACAACAAATCACAGTCTGC----- mirR 18 3
-----GACAACAAATCACAGTCTGCC----- mirR 21 3
-----ACAACAAATCACAGTCTGCC----- mirR 20 2
-----AACAAATCACAGTCTGCCATATG----- mirR 23 2
-----ACAACAAATCACAGTCTG----- mirR 18 1
-----CAAATCACAGTCTGCCATAT----- mirR 20 1
-----GACAACAAATCACAGTCTGCCATATG----- mirR 26 1
-----GCACAGGCCACCTCTACA----- morR 18 3
-----ATATGGCACAGGCCACCT----- morR 18 2
-----GGCACAGGCCACCTCTAC----- morR 18 1

```

```

-----GCACAGGCCACCTCTACAGGAC morR 22 1
-----CACAGGCCACCTCTACAG--- morR 18 1

>mmu-mir-10b
GACCCGAGGTTGTAACGTTGTCTATATATACCCTGTAGAACCGAATTTGTGTGGTACCCACATAGTCACAGATTCGATTCTAGGGGAATATATGGTTCGATGCAAAAAC species len reads
GACCCGAGGTTGTAACGTTGTCTATATAT----- morL 29 22
-----TTGTAACGTTGTCTATATA----- morL 19 2
-----GTTGTAACGTTGTCTATATA----- morL 20 1
-----TACCCTGTAGAACCGAATTTGT----- mirL 22 100697
-----TACCCTGTAGAACCGAATTTGTG----- mirL 23 92877
-----ACCCTGTAGAACCGAATTTGTGT----- mirL 23 36982
-----ACCCTGTAGAACCGAATTTGTG----- mirL 22 36853
-----TACCCTGTAGAACCGAATTTGTGT----- mirL 24 21950
-----ACCCTGTAGAACCGAATTTGT----- mirL 21 7478
-----TACCCTGTAGAACCGAATTTG----- mirL 21 3807
-----CCCTGTAGAACCGAATTTGTGT----- mirL 22 1781
-----TACCCTGTAGAACCGAATT----- mirL 19 1422
-----ACCCTGTAGAACCGAATTTGTGTG----- mirL 24 1388
-----ACCCTGTAGAACCGAATTTGTGTGG----- mirL 25 1217
-----TACCCTGTAGAACCGAAT----- mirL 18 1044
-----CCCTGTAGAACCGAATTTGTG----- mirL 21 984
-----TACCCTGTAGAACCGAATTT----- mirL 20 834
-----CCCTGTAGAACCGAATTTGT----- mirL 20 819
-----ACCCTGTAGAACCGAATTTG----- mirL 20 630
-----CCCTGTAGAACCGAATTTG----- mirL 19 540
-----ACCCTGTAGAACCGAATT----- mirL 18 188
-----CCTGTAGAACCGAATTTGTG----- mirL 20 30
-----CCCTGTAGAACCGAATTT----- mirL 18 30
-----CCTGTAGAACCGAATTTGT----- mirL 19 19
-----ATACCCTGTAGAACCGAATTTGT----- mirL 23 6
-----CCTGTAGAACCGAATTTG----- mirL 18 6
-----CCCTGTAGAACCGAATTTGTGTG----- mirL 23 4
-----ATACCCTGTAGAACCGAA----- mirL 18 3
-----CCCTGTAGAACCGAATTTGTGTGG----- mirL 24 2
-----CCTGTAGAACCGAATTTGTGT----- mirL 21 1
-----TATACCCTGTAGAACCGAATTTGT----- mirL 24 1
-----ATATACCCTGTAGAACCGAATTTGT----- mirL 25 1
-----TATACCCTGTAGAACCGAATTTGTG----- mirL 25 1
-----ATACCCTGTAGAACCGAATTTGTG----- mirL 24 1
-----TATACCCTGTAGAACCGAA----- mirL 19 1
-----GTGGTACCCACATAGTCA----- loop 18 19
-----TGGTACCCACATAGTCAC----- loop 18 10
-----GGTACCCACATAGTCACA----- loop 18 4
-----GTGGTACCCACATAGTCAC----- loop 19 1
-----CAGATTCGATTCTAGGGGAATA----- mirR 22 1232
-----AGATTCGATTCTAGGGGAATA----- mirR 21 1045

```

```

-----ACAGATTCGATTCTAGGGGAAT----- mirR 22 173
-----AGATTCGATTCTAGGGGAATAT----- mirR 22 139
-----ACAGATTCGATTCTAGGGGAA----- mirR 21 99
-----CAGATTCGATTCTAGGGGAATAT----- mirR 23 79
-----CAGATTCGATTCTAGGGGAAT----- mirR 21 69
-----CAGATTCGATTCTAGGGGAA----- mirR 20 65
-----AGATTCGATTCTAGGGGAAT----- mirR 20 51
-----CACAGATTCGATTCTAGGGGAA----- mirR 22 27
-----ACAGATTCGATTCTAGGGGAATA----- mirR 23 27
-----CACAGATTCGATTCTAGGGGA----- mirR 21 23
-----CAGATTCGATTCTAGGGGAATATA----- mirR 24 23
-----CACAGATTCGATTCTAGGGGAATA----- mirR 24 20
-----TCACAGATTCGATTCTAGGGG----- mirR 21 19
-----CAGATTCGATTCTAGGGGA----- mirR 19 17
-----ACAGATTCGATTCTAGGGGA----- mirR 20 11
-----AGATTCGATTCTAGGGGAA----- mirR 19 11
-----ACAGATTCGATTCTAGGG----- mirR 18 11
-----TCACAGATTCGATTCTAGGGGA----- mirR 22 10
-----CACAGATTCGATTCTAGGGGAAT----- mirR 23 8
-----ACAGATTCGATTCTAGGGGAATAT----- mirR 24 7
-----AGATTCGATTCTAGGGGAATATA----- mirR 23 7
-----AGATTCGATTCTAGGGGA----- mirR 18 6
-----GATTCGATTCTAGGGGAATAT----- mirR 21 4
-----ACAGATTCGATTCTAGGGG----- mirR 19 3
-----TCACAGATTCGATTCTAGGGGAA----- mirR 23 2
-----GATTCGATTCTAGGGGAAT----- mirR 19 2
-----ATTTCGATTCTAGGGGAAT----- mirR 18 1
-----CAGATTCGATTCTAGGGG----- mirR 18 1
-----TATGGTCGATGCAAAAAAC morR 18 2
-----TATATGGTCGATGCAAAAA- morR 19 1

```

>mmu-mir-99a

```

GAGACGATGCCCATGACATAAACCCGTAGATCCGATCTTGTGGTGAAGTGGACCGCGCAAGCTCGTTTCTATGGGTCTGTGGCAGTGTGGTGATCTGACAAAGC species len reads
-----ATGCCCATGACATAAAC----- morL 18 2
GAGACGATGCCCATGACA----- morL 19 1
-----AACCCGTAGATCCGATCTTGTG----- mirL 22 187894
-----AACCCGTAGATCCGATCTTGTGG----- mirL 23 65942
-----AACCCGTAGATCCGATCTTGT----- mirL 21 40589
-----AACCCGTAGATCCGATCTTGTGGT----- mirL 24 2892
-----AACCCGTAGATCCGATCTTGT----- mirL 20 2742
-----AACCCGTAGATCCGATCTTGT----- mirL 20 949
-----AACCCGTAGATCCGATCTT----- mirL 19 708
-----AACCCGTAGATCCGATCT----- mirL 18 472
-----AAACCCGTAGATCCGATCTTGT----- mirL 22 438
-----AACCCGTAGATCCGATCTTGT----- mirL 19 433
-----AACCCGTAGATCCGATCTTGT----- mirL 21 226

```

```

-----AAACCCGTAGATCCGATCTTGTG----- mirL 23 179
-----ACCCGTAGATCCGATCTTGTGG----- mirL 22 67
-----CCCGTAGATCCGATCTTGTG----- mirL 20 41
-----CCCGTAGATCCGATCTTGT----- mirL 18 37
-----CCCGTAGATCCGATCTTGT----- mirL 19 24
-----ACCCGTAGATCCGATCTT----- mirL 18 20
-----CCGTAGATCCGATCTTGT----- mirL 18 18
-----CCGTAGATCCGATCTTGTG----- mirL 19 14
-----AAACCCGTAGATCCGATCTTGT----- mirL 21 12
-----AAACCCGTAGATCCGATCTTGTGG----- mirL 24 10
-----ACCCGTAGATCCGATCTTGTGGT----- mirL 23 7
-----AAACCCGTAGATCCGATC----- mirL 18 4
-----AAACCCGTAGATCCGATCTT----- mirL 20 3
-----AAACCCGTAGATCCGATCT----- mirL 19 2
-----TAAACCCGTAGATCCGAT----- mirL 18 1
-----CCGTAGATCCGATCTTGTGG----- mirL 20 1
-----TAAACCCGTAGATCCGATCTTGTG----- mirL 24 1
-----CCGTAGATCCGATCTTGTGGT----- mirL 21 1
-----ACCCGTAGATCCGATCTTGTGGT----- mirL 24 1
-----CCCGTAGATCCGATCTTGTGG----- mirL 21 1
-----GTGAAGTGGACCGCGCAA----- loop 18 2
-----CAAGCTCGTTTCTATGGGTCTG----- mirR 22 2090
-----CAAGCTCGTTTCTATGGGTCTGT----- mirR 23 1133
-----CAAGCTCGTTTCTATGGGTCT----- mirR 21 421
-----CAAGCTCGTTTCTATGGGTCTGTG----- mirR 24 224
-----CAAGCTCGTTTCTATGGGTCTGTGG----- mirR 25 184
-----CAAGCTCGTTTCTATGGGTCT----- mirR 20 179
-----AAGCTCGTTTCTATGGGTCTGT----- mirR 22 79
-----AGCTCGTTTCTATGGGTCTG----- mirR 20 33
-----AAGCTCGTTTCTATGGGTCTGTGG----- mirR 24 33
-----AAGCTCGTTTCTATGGGTCTG----- mirR 21 18
-----AAGCTCGTTTCTATGGGTCTGTG----- mirR 23 17
-----GCTCGTTTCTATGGGTCTG----- mirR 19 16
-----CAAGCTCGTTTCTATGGGT----- mirR 19 10
-----GCAAGCTCGTTTCTATGGGTCTG----- mirR 23 7
-----GCAAGCTCGTTTCTATGGGTCT----- mirR 22 2
-----AAGCTCGTTTCTATGGGT----- mirR 18 1
-----AGCTCGTTTCTATGGGTCT----- mirR 19 1
-----AAGCTCGTTTCTATGGGTCT----- mirR 20 1
-----CAGTGTGGTGATCTGACAAAGC morR 22 2
-----TGGCAGTGTGGTGATCTGAC----- morR 20 2
-----CAGTGTGGTGATCTGACAA--- morR 19 2
-----CTGTGGCAGTGTGGTGAT----- morR 18 1
-----GCAGTGTGGTGATCTGAC----- morR 18 1
-----TGGCAGTGTGGTGATCTGACAA--- morR 22 1

```

>mmu-mir-106b

```

CGCCTCCTTCCCTCCTACCAGCCCTGCTGGGACTAAAGTGCTGACAGTGCAGATAGTGGTCTCTGTGCTACCGACTGTGGGTACTTGCTGCTCCAGCAGGGCAGTGCAACGCCCATGGAGGG species len
-----CCTACCAGCCCTGCTGGGAC----- morL 20 31
-----TCCCTCCTACCAGCCCTGCTGGGAC----- morL 25 10
-----CTACCAGCCCTGCTGGGAC----- morL 19 10
-GCCTCCTTCCCTCCTACCAGCCCTGCTGGGAC----- morL 32 6
-----TCCTACCAGCCCTGCTGGGAC----- morL 21 4
CGCCTCCTTCCCTCCTACCAGCCCTGCTGGGAC----- morL 33 3
-----TTCCCTCCTACCAGCCCTGCTGGGAC----- morL 26 3
-GCCTCCTTCCCTCCTACCAGCCCTGCTGG----- morL 29 2
-----CCAGCCCTGCTGGGACTAA----- morL 19 1
-----TCCCTCCTACCAGCCCTGCTGG----- morL 22 1
-----TCCTACCAGCCCTGCTGGGACT----- morL 22 1
-----CCTACCAGCCCTGCTGGGACT----- morL 21 1
-----TAAAGTGCTGACAGTGCAGATA----- mirL 22 12214
-----TAAAGTGCTGACAGTGCAGAT----- mirL 21 82853
-----TAAAGTGCTGACAGTGCAGATAG----- mirL 23 16119
-----AAAGTGCTGACAGTGCAGAT----- mirL 20 10371
-----TAAAGTGCTGACAGTGCAGA----- mirL 20 9806
-----AAAGTGCTGACAGTGCAGATA----- mirL 21 5359
-----AAAGTGCTGACAGTGCAGATAG----- mirL 22 2284
-----TAAAGTGCTGACAGTGCAG----- mirL 19 2233
-----TAAAGTGCTGACAGTGCAGATAGT----- mirL 24 1633
-----AAAGTGCTGACAGTGCAGA----- mirL 19 898
-----TAAAGTGCTGACAGTGCAG----- mirL 18 632
-----AAAGTGCTGACAGTGCAG----- mirL 18 359
-----AAAGTGCTGACAGTGCAGATAGT----- mirL 23 286
-----CTAAAGTGCTGACAGTGCAGATA----- mirL 23 71
-----AAGTGCTGACAGTGCAGATA----- mirL 20 61
-----AAGTGCTGACAGTGCAGAT----- mirL 19 45
-----CTAAAGTGCTGACAGTGCAGAT----- mirL 22 45
-----AAAGTGCTGACAGTGCAGATAGTG----- mirL 24 32
-----AGTGCTGACAGTGCAGATA----- mirL 19 31
-----ACTAAAGTGCTGACAGTGCAGATA----- mirL 24 22
-----AGTGCTGACAGTGCAGAT----- mirL 18 17
-----AAGTGCTGACAGTGCAGATAG----- mirL 21 9
-----CTAAAGTGCTGACAGTGCAGA----- mirL 21 7
-----AAGTGCTGACAGTGCAGA----- mirL 18 5
-----ACTAAAGTGCTGACAGTGCAGAT----- mirL 23 5
-----ACTAAAGTGCTGACAGTGCAGA----- mirL 22 3
-----CTAAAGTGCTGACAGTGCAGATAG----- mirL 24 3
-----AAGTGCTGACAGTGCAGATAGTG----- mirL 23 2
-----CTAAAGTGCTGACAGTGCAG----- mirL 20 2
-----GACTAAAGTGCTGACAGTGCAGATA----- mirL 25 2
-----GACTAAAGTGCTGACAGTG----- mirL 19 1
-----ACTAAAGTGCTGACAGTGCAGATAG----- mirL 25 1

```



```

-----AAGTGCTGACAGTGCAGATAGT----- mirL 22 1
-----AAGTGCTGACAGTGCAGATAGTGGTCCTC----- mirL 29 1
-----AGTGCTGACAGTGCAGATAGT----- mirL 21 1
-----GACTAAAGTGCTGACAGTGC----- mirL 20 1
-----AGTGCTGACAGTGCAGATAG----- mirL 20 1
-----GTGGTCCTCTCTGTGCTA----- loop 18 2148
-----GTGGTCCTCTCTGTGCTAC----- loop 19 112
-----GTGGTCCTCTCTGTGCTACC----- loop 20 53
-----GTGGTCCTCTCTGTGCTACCG----- loop 21 20
-----AGTGGTCCTCTCTGTGCTAC----- loop 20 17
-----TGGTCCTCTCTGTGCTACC----- loop 19 2
-----AGTGGTCCTCTCTGTGCTA----- loop 19 2
-----TGGTCCTCTCTGTGCTAC----- loop 18 1
-----AGTGGTCCTCTCTGTGCTACC----- loop 21 1
-----TAGTGGTCCTCTCTGTGC----- loop 18 1
-----GTCCTCTCTGTGCTACCG----- loop 18 1
-----AGTGGTCCTCTCTGTGCT----- loop 18 1
-----CCGCACTGTGGGTACTTGCTG----- mirR 21 15913
-----CCGCACTGTGGGTACTTGCTGC----- mirR 22 11967
-----CCGCACTGTGGGTACTTGCT----- mirR 20 6303
-----CCGCACTGTGGGTACTTGCTGCT----- mirR 23 2594
-----CCGCACTGTGGGTACTTGCTGCTC----- mirR 24 2426
-----TACCGCACTGTGGGTACTTGCT----- mirR 22 1661
-----CCGCACTGTGGGTACTTGCT----- mirR 19 1276
-----CCGCACTGTGGGTACTTGCTGCTCC----- mirR 25 454
-----TACCGCACTGTGGGTACTTGCTGC----- mirR 24 306
-----ACCGCACTGTGGGTACTTGCTG----- mirR 22 270
-----TACCGCACTGTGGGTACTTGCT----- mirR 21 253
-----ACCGCACTGTGGGTACTTGCT----- mirR 21 182
-----ACCGCACTGTGGGTACTTGCTGC----- mirR 23 172
-----TACCGCACTGTGGGTACTTGCTG----- mirR 23 163
-----ACCGCACTGTGGGTACTTGCT----- mirR 20 60
-----CGCACTGTGGGTACTTGCTG----- mirR 20 36
-----TACCGCACTGTGGGTACTTG----- mirR 20 35
-----ACCGCACTGTGGGTACTTGCTGCT----- mirR 24 28
-----TACCGCACTGTGGGTACTTGCTGCT----- mirR 25 17
-----CGCACTGTGGGTACTTGCTGC----- mirR 21 16
-----TACCGCACTGTGGGTACTTGCTGCTC----- mirR 26 10
-----GCACTGTGGGTACTTGCTG----- mirR 19 8
-----CGCACTGTGGGTACTTGCT----- mirR 19 7
-----ACCGCACTGTGGGTACTT----- mirR 18 5
-----GCACTGTGGGTACTTGCTGC----- mirR 20 5
-----ACCGCACTGTGGGTACTTG----- mirR 19 4
-----CGCACTGTGGGTACTTGCTGCTC----- mirR 23 2
-----GCACTGTGGGTACTTGCT----- mirR 18 2
-----CACTGTGGGTACTTGCTGC----- mirR 19 2

```

```

-----CTACCGCACTGTGGGTACTTGCT----- mirR 23 1
-----CTACCGCACTGTGGGTACTTGCTGCTC----- mirR 27 1
-----CTACCGCACTGTGGGTAC----- mirR 18 1
-----GCACTGTGGGTACTTGCTGCT----- mirR 21 1
-----GCACTGTGGGTACTTGCTGCTC----- mirR 22 1
-----CGCACTGTGGGTACTTGCTGCT----- mirR 22 1
-----TCCAGCAGGGCACGTGCAACG----- morR 21 139
-----TCCAGCAGGGCACGTGCAACGCCCATGGAGGG morR 32 93
-----TCCAGCAGGGCACGTGCAACGCCCATGG---- morR 28 65
-----TCCAGCAGGGCACGTGCAACGCCCC----- morR 24 58
-----TCCAGCAGGGCACGTGCAAC----- morR 20 57
-----TCCAGCAGGGCACGTGCAACGCCCATGGA---- morR 29 55
-----TCCAGCAGGGCACGTGCAACGCCCATG----- morR 27 48
-----CCAGCAGGGCACGTGCAAC----- morR 19 2
-----TGCTCCAGCAGGGCACGTGCA----- morR 21 1
-----CCAGCAGGGCACGTGCAACGCCCATG----- morR 26 1

```

>mmu-mir-30d

```

GCTGTCAGAAAAGTCTGTGTCTGTAAACATCCCCGACTGGAAGCTGTAAGCCACAGCCAAGCTTTCAGTCAGATGTTTGCTGCTACTGGCTCTTCGAATGCATCTTTT species len reads
GCTGTCAGAAAAGTCTGTGTCT----- morL 20 6
-CTGTCAGAAAAGTCTGTGTCT----- morL 19 6
-CTGTCAGAAAAGTCTGTGT----- morL 18 4
GCTGTCAGAAAAGTCTGTGT----- morL 19 2
----TCAGAAAAGTCTGTGTCTGT----- morL 19 1
----CAGAAAAGTCTGTGTCTGT----- morL 18 1
-CTGTCAGAAAAGTCTGTGTCT----- morL 20 1
GCTGTCAGAAAAGTCTGTGTCT----- morL 21 1
----TCAGAAAAGTCTGTGTCTG----- morL 18 1
-----TGTAACATCCCCGACTGGAAGCT----- mirL 24 159660
-----TGTAACATCCCCGACTGGAAGC----- mirL 23 57120
-----TGTAACATCCCCGACTGGAAG----- mirL 22 28167
-----TGTAACATCCCCGACTGGAAGCTG----- mirL 25 17144
-----TGTAACATCCCCGACTGGAAGCTGT----- mirL 26 8603
-----TGTAACATCCCCGACTGGAA----- mirL 21 7448
-----GTAACATCCCCGACTGGAAGCT----- mirL 23 3812
-----TGTAACATCCCCGACTGGAA----- mirL 20 2198
-----GTAACATCCCCGACTGGAAGC----- mirL 22 1709
-----GTAACATCCCCGACTGGAAGCTG----- mirL 24 1049
-----GTAACATCCCCGACTGGAAG----- mirL 21 866
-----GTAACATCCCCGACTGGAAGCTGT----- mirL 25 715
-----GTAACATCCCCGACTGGAA----- mirL 20 370
-----GTAACATCCCCGACTGGAAGCTGTA----- mirL 26 145
-----CTGTAACATCCCCGACTGGAAGCT----- mirL 25 62
-----TAAACATCCCCGACTGGAAGCT----- mirL 22 54
-----AAACATCCCCGACTGGAAGCT----- mirL 21 35
-----AAACATCCCCGACTGGAAGC----- mirL 20 17

```

```
-----TAAACATCCCCGACTGGAAG----- mirL 20 16
-----CTGTAAACATCCCCGACTGGAAGC----- mirL 24 16
-----CTGTAAACATCCCCGACTGGAAG----- mirL 23 13
-----GCTGTAAACATCCCCGACTGGAA----- mirL 24 12
-----TCTGTAAACATCCCCGACTGGAAGCT----- mirL 26 11
-----AAACATCCCCGACTGGAAG----- mirL 19 10
-----TAAACATCCCCGACTGGAAGCTG----- mirL 23 9
-----TAAACATCCCCGACTGGAAGCTGT----- mirL 24 5
-----TAAACATCCCCGACTGGAAGC----- mirL 21 5
-----CTGTAAACATCCCCGACTGGAAGCTG----- mirL 26 5
-----AAACATCCCCGACTGGAAGCTG----- mirL 22 5
-----TAAACATCCCCGACTGGAAGCTGTA----- mirL 25 4
-----GCTGTAAACATCCCCGACTGGAAGCT----- mirL 27 1
-----TAAACATCCCCGACTGGAA----- mirL 19 1
-----CTGTAAACATCCCCGACTGGA----- mirL 21 1
-----CTGTAAACATCCCCGACTG----- mirL 19 1
-----TCTGTAAACATCCCCGACTGGAA----- mirL 23 1
-----TCTGTAAACATCCCCGAC----- mirL 18 1
-----AAACATCCCCGACTGGAAGCTGT----- mirL 23 1
-----GTAAGCCACAGCCAAGCTT----- loop 19 2
-----GTAAGCCACAGCCAAGCT----- loop 18 2
-----TGTAAGCCACAGCCAAGC----- loop 18 1
-----CTGTAAAGCCACAGCCAAGC----- loop 19 1
-----CTTTCAGTCAGATGTTTGCTGC----- mirR 22 1325
-----CTTTCAGTCAGATGTTTGCTG----- mirR 21 121
-----CTTTCAGTCAGATGTTTGCTGCT----- mirR 23 67
-----CTTTCAGTCAGATGTTTGCT----- mirR 20 43
-----GCTTTCAGTCAGATGTTT----- mirR 18 28
-----TTTCAGTCAGATGTTTGCTGC----- mirR 21 16
-----CTTTCAGTCAGATGTTTG----- mirR 18 15
-----CTTTCAGTCAGATGTTTGCTGCTA----- mirR 24 11
-----CTTTCAGTCAGATGTTTG----- mirR 19 10
-----TCAGTCAGATGTTTGCTGC----- mirR 19 7
-----TCAGTCAGATGTTTGCTG----- mirR 18 6
-----TTTCAGTCAGATGTTTGCTG----- mirR 20 2
-----GCTTTCAGTCAGATGTTTG----- mirR 19 2
-----TTTCAGTCAGATGTTTGCTGCTA----- mirR 23 1
-----GCTTTCAGTCAGATGTTTGCTGC----- mirR 23 1
-----TTTCAGTCAGATGTTTGCTGCT----- mirR 22 1
-----TACTGGCTCTTCGAATGCATCTTTT morR 25 2
-----ACTGGCTCTTCGAATGCA----- morR 18 2

>mmu-let-7a-2
CTCCAGCCATTGTGACTGCATGTTCCAGGTTGAGGTAGTAGTTGTATAGTTTAGAGTTACATCAAGGGAGATAACTGTACAGCCTCCTAGCTTTCCTTGGGACTTGACACAAAGCAACATGGCAAGAAC species 1
-----GTGACTGCATGTTCCAGGT----- morL 20 10
-----TGTGACTGCATGTTCCAGGT----- morL 21 32
```

|                                       |      |    |    |
|---------------------------------------|------|----|----|
| -----GACTGCATGTTCCCAGGT-----          | morL | 18 | 30 |
| -----TTGTGACTGCATGTTCCCAGGT-----      | morL | 22 | 15 |
| -----TGACTGCATGTTCCCAGGT-----         | morL | 19 | 5  |
| -----GTGACTGCATGTTCCCAGGTT-----       | morL | 21 | 4  |
| -----TGTGACTGCATGTTCCCAGG-----        | morL | 20 | 2  |
| -----GTGACTGCATGTTCCCAGG-----         | morL | 19 | 1  |
| -----TTGTGACTGCATGTTCCCAGGTT-----     | morL | 23 | 1  |
| -----ACTGCATGTTCCCAGGTTG-----         | morL | 19 | 1  |
| -----TGTGACTGCATGTTCCCA-----          | morL | 18 | 1  |
| -----GTGACTGCATGTTCCCAG-----          | morL | 18 | 1  |
| -----TGTGACTGCATGTTCCCAGGTT-----      | morL | 22 | 1  |
| -----TTGTGACTGCATGTTCCCAGG-----       | morL | 21 | 1  |
| -----TGTGACTGCATGTTCCCAGGTTGA-----    | morL | 24 | 1  |
| CTCCAGCCATTGTGACTGCATGTTCCCAGGTT----- | morL | 32 | 1  |
| -----TGACTGCATGTTCCCAGGTT-----        | morL | 20 | 1  |
| -----TGAGGTAGTAGGTTGTATAGTT-----      | mirL | 22 | 18 |
| -----TGAGGTAGTAGGTTGTATAGT-----       | mirL | 21 | 36 |
| -----TGAGGTAGTAGGTTGTATAGTTT-----     | mirL | 23 | 32 |
| -----TGAGGTAGTAGGTTGTATAG-----        | mirL | 20 | 75 |
| -----TGAGGTAGTAGGTTGTATAGTTTA-----    | mirL | 24 | 45 |
| -----GAGGTAGTAGGTTGTATAGTT-----       | mirL | 21 | 32 |
| -----GAGGTAGTAGGTTGTATAGTTT-----      | mirL | 22 | 10 |
| -----TGAGGTAGTAGGTTGTATAGTTTAG-----   | mirL | 25 | 87 |
| -----TGAGGTAGTAGGTTGTATA-----         | mirL | 19 | 69 |
| -----GAGGTAGTAGGTTGTATAGT-----        | mirL | 20 | 59 |
| -----GAGGTAGTAGGTTGTATAG-----         | mirL | 19 | 26 |
| -----GAGGTAGTAGGTTGTATAGTTTA-----     | mirL | 23 | 26 |
| -----TTGAGGTAGTAGGTTGTATAGTT-----     | mirL | 23 | 15 |
| -----TTGAGGTAGTAGGTTGTATAGT-----      | mirL | 22 | 67 |
| -----AGGTAGTAGGTTGTATAGTT-----        | mirL | 20 | 32 |
| -----TTGAGGTAGTAGGTTGTATAGTTT-----    | mirL | 24 | 30 |
| -----GGTAGTAGGTTGTATAGTT-----         | mirL | 19 | 29 |
| -----GAGGTAGTAGGTTGTATAGTTTAG-----    | mirL | 24 | 26 |
| -----GTTGAGGTAGTAGGTTGTATAGTT-----    | mirL | 24 | 17 |
| -----GGTAGTAGGTTGTATAGT-----          | mirL | 18 | 11 |
| -----GAGGTAGTAGGTTGTATAGTTTAGA-----   | mirL | 25 | 8  |
| -----AGGTAGTAGGTTGTATAGTTT-----       | mirL | 21 | 7  |
| -----TTGAGGTAGTAGGTTGTATAGTTTA-----   | mirL | 25 | 6  |
| -----AGGTAGTAGGTTGTATAGT-----         | mirL | 19 | 5  |
| -----GGTTGAGGTAGTAGGTTGTATAGTT-----   | mirL | 25 | 5  |
| -----GGTAGTAGGTTGTATAGTTT-----        | mirL | 20 | 5  |
| -----AGGTAGTAGGTTGTATAG-----          | mirL | 18 | 3  |
| -----TTGAGGTAGTAGGTTGTATAGTTTAG-----  | mirL | 26 | 2  |
| -----TTGAGGTAGTAGGTTGTATAG-----       | mirL | 21 | 2  |
| -----AGGTAGTAGGTTGTATAGTTTAG-----     | mirL | 23 | 2  |
| -----GTTGAGGTAGTAGGTTGTATA-----       | mirL | 21 | 2  |

```

-----GGTTGAGGTAGTAGGTTGTATAG----- mirL 23 1
-----AGGTAGTAGGTTGTATAGTTTA----- mirL 22 1
-----TTGAGGTAGTAGGTTGTATAGTTTAGA----- mirL 27 1
-----GGTTGAGGTAGTAGGTTGTATA----- mirL 22 1
-----GTTGAGGTAGTAGGTTGTATAGT----- mirL 23 1
-----GTTGAGGTAGTAGGTTGTATAGTTT----- mirL 25 1
-----TAGAGTTACATCAAGGGAGATAA----- loop 23 41
-----TAGAGTTACATCAAGGGAGATA----- loop 22 2
-----AGAGTTACATCAAGGGAGA----- loop 19 1
-----AGTTACATCAAGGGAGATAA----- loop 20 1
-----CTGTACAGCCTCCTAGCTTTC----- mirR 22 15
-----CTGTACAGCCTCCTAGCTTTC----- mirR 21 35
-----CTGTACAGCCTCCTAGCTTTC----- mirR 20 69
-----CTGTACAGCCTCCTAGCTTTCCT----- mirR 23 54
-----TGTACAGCCTCCTAGCTTTC----- mirR 21 37
-----GTACAGCCTCCTAGCTTTC----- mirR 20 25
-----TGTACAGCCTCCTAGCTTTC----- mirR 20 24
-----ACTGTACAGCCTCCTAGCTTTC----- mirR 22 19
-----CTGTACAGCCTCCTAGCTTTCCTT----- mirR 24 14
-----TACAGCCTCCTAGCTTTC----- mirR 19 5
-----CTGTACAGCCTCCTAGCTTTC----- mirR 19 4
-----ACTGTACAGCCTCCTAGCTTTC----- mirR 23 4
-----ACTGTACAGCCTCCTAGCTTTC----- mirR 21 3
-----CTGTACAGCCTCCTAGCT----- mirR 18 2
-----TAACTGTACAGCCTCCTA----- mirR 18 2
-----TACAGCCTCCTAGCTTTCCT----- mirR 20 1
-----AACTGTACAGCCTCCTAGCTTTCCT----- mirR 25 1
-----TGTACAGCCTCCTAGCTTTC----- mirR 19 1
-----TGTACAGCCTCCTAGCTTTCCTT----- mirR 23 1
-----ACTGTACAGCCTCCTAGCT----- mirR 19 1
-----TAACTGTACAGCCTCCTAGCTTTC----- mirR 24 1
-----GTACAGCCTCCTAGCTTTC----- mirR 19 1
-----CTTGGGACTTGCACAAAG----- morR 18 2
-----GGACTTGCACAAAGCAAC----- morR 18 2
-----TTGGGACTTGCACAAAGCAACATGGCAAGAAC morR 32 1
-----TGGGACTTGCACAAAGCA----- morR 18 1
-----TTGGGACTTGCACAAAGC----- morR 18 1
-----GGGACTTGCACAAAGCAA----- morR 18 1

```

>mmu-let-7a-1

```

CTGGATGTTCTCTTCACTGTGGGATGAGGTAGTAGGTTGTATAGTTT TAGGGTCACACCCACCACTGGGAGATAACTATACAATCTACTGTCTTTCCTAAGGTGATGGAAAAGTCTGCATTCATGGGGTCTCATAGGAAAC
-----GTTCTCTTCACTGTGGGA-----
-----ATGTTCTCTTCACTGTGGGA-----
-----TGTCTCTTCACTGTGGG-----
-----TGTCTCTTCACTGTGGGA-----
-----TGTCTCTTCACTGTGGGATGA-----

```

```
-----GTTCTCTTCACTGTGGGAT-----
-----TCTCTTCACTGTGGGATGA-----
CTGGATGTTCTCTTCACTGTGG-----
-----TTCTCTTCACTGTGGGAT-----
-----TGAGGTAGTAGGTTGTATAGTT-----
-----TGAGGTAGTAGGTTGTATAGT-----
-----TGAGGTAGTAGGTTGTATAGTTT-----
-----TGAGGTAGTAGGTTGTATAG-----
-----TGAGGTAGTAGGTTGTATAGTTTT-----
-----GAGGTAGTAGGTTGTATAGTT-----
-----GAGGTAGTAGGTTGTATAGTTT-----
-----TGAGGTAGTAGGTTGTATAGTTTTA-----
-----TGAGGTAGTAGGTTGTATA-----
-----GAGGTAGTAGGTTGTATAGT-----
-----GAGGTAGTAGGTTGTATAGTTT-----
-----GAGGTAGTAGGTTGTATAG-----
-----GAGGTAGTAGGTTGTATAGTTTTA-----
-----ATGAGGTAGTAGGTTGTATAGTT-----
-----AGGTAGTAGGTTGTATAGTT-----
-----GGTAGTAGGTTGTATAGTT-----
-----ATGAGGTAGTAGGTTGTATAGT-----
-----GGTAGTAGGTTGTATAGT-----
-----ATGAGGTAGTAGGTTGTATAGTTT-----
-----AGGTAGTAGGTTGTATAGTTT-----
-----GAGGTAGTAGGTTGTATA-----
-----ATGAGGTAGTAGGTTGTATAG-----
-----AGGTAGTAGGTTGTATAGT-----
-----GGTAGTAGGTTGTATAGTTT-----
-----AGGTAGTAGGTTGTATAG-----
-----ATGAGGTAGTAGGTTGTAT-----
-----AGGTAGTAGGTTGTATAGTTTT-----
-----GGATGAGGTAGTAGGTTG-----
-----ATGAGGTAGTAGGTTGTATAGTTTT-----
-----ATGAGGTAGTAGGTTGTATAGTTTTAG-----
-----GGTAGTAGGTTGTATAGTTTTAGG-----
-----TAGGAAAC-----
-----TAGGAAAC-----
-----TAGGAAAC-----
-----AGGAAAC-----
-----ATAGGAAAC-----
-----GAAAC-----
-----TCATAGGAAAC-----
-----AGGAAAC-----
```

>mmu-mir-7a-2  
CGGTCGGGCCAGCCCCGTTTGAAGACTAGTGATTTTTGTTGTTGTCTCTGTATCCAACAACAAGTCCCAGTCTGCCACATGGTCTGGTCATTTTCAGCAGC species len reads

```

CGGTTCGGGCCAGCCCCGTT----- morL 19 5
---TCGGGCCAGCCCCGTTG----- morL 18 3
-----TGGAAGACTAGTGATTTTGTGTT----- mirL 24 191633
-----TGGAAGACTAGTGATTTTGTGTT----- mirL 23 43914
-----TGGAAGACTAGTGATTTTGTGTTG----- mirL 25 12009
-----TGGAAGACTAGTGATTTTGTGTTG----- mirL 22 10717
-----GGAAGACTAGTGATTTTGTGTT----- mirL 23 8038
-----TGGAAGACTAGTGATTTTGTGTTGTT----- mirL 26 3316
-----TGGAAGACTAGTGATTTTGTGTT----- mirL 21 1948
-----GGAAGACTAGTGATTTTGTGTT----- mirL 22 1725
-----TGGAAGACTAGTGATTTTGTGTTGTTG----- mirL 27 1037
-----GGAAGACTAGTGATTTTGTGTTG----- mirL 21 378
-----GGAAGACTAGTGATTTTGTGTTG----- mirL 24 285
-----GGAAGACTAGTGATTTTGTGTTGTT----- mirL 25 119
-----AAGACTAGTGATTTTGTGTT----- mirL 21 92
-----GAAGACTAGTGATTTTGTGTT----- mirL 22 60
-----GGAAGACTAGTGATTTTGTGTT----- mirL 20 60
-----TTGGAAGACTAGTGATTTTGTGTT----- mirL 25 56
-----GGAAGACTAGTGATTTTGTGTTGTTG----- mirL 26 33
-----AAGACTAGTGATTTTGTGTT----- mirL 20 17
-----GAAGACTAGTGATTTTGTGTT----- mirL 19 9
-----TTGGAAGACTAGTGATTTTGTGTT----- mirL 22 7
-----TTGGAAGACTAGTGATTTTGTGTT----- mirL 24 6
-----GAAGACTAGTGATTTTGTGTT----- mirL 21 5
-----TTTGAAGACTAGTGATTTTGTGTT----- mirL 23 5
-----TTTGAAGACTAGTGATTTTGTGTT----- mirL 26 4
-----TTTGAAGACTAGTGATTTTGTGTTG----- mirL 27 3
-----TTGGAAGACTAGTGATTTTGTGTT----- mirL 20 3
-----AAGACTAGTGATTTTGTGTTG----- mirL 22 2
-----GAAGACTAGTGATTTTGTGTTG----- mirL 20 2
-----TTGGAAGACTAGTGATTTTGTGTTG----- mirL 26 1
-----AAGACTAGTGATTTTGTGTT----- mirL 18 1
-----GAAGACTAGTGATTTTGTGTTG----- mirL 23 1
-----TTGGAAGACTAGTGATTTTGTGTTG----- mirL 23 1
-----TTTGAAGACTAGTGATTT----- mirL 19 1
-----GTTTGAAGACTAGTGATTTTGTGTT----- mirL 27 1
-----AAGACTAGTGATTTTGTGTT----- mirL 19 1
-----TTTGAAGACTAGTGATTTTGTGTT----- mirL 25 1
-----GTTGTGTCTCTGTATCCA----- loop 18 1
-----GTGTCTCTGTATCCAACA----- loop 18 1
-----CAACAAGTCCCAGTCTGCCACA----- mirR 22 377
-----CAACAAGTCCCAGTCTGCCACAT----- mirR 23 50
-----CAACAAGTCCCAGTCTGCCAC----- mirR 21 32
-----AACAAGTCCCAGTCTGCCACA----- mirR 21 23
-----CAACAAGTCCCAGTCTGCCA----- mirR 20 19
-----ACAACAAGTCCCAGTCTGCCACA----- mirR 23 4

```

```

-----ACAAGTCCCAGTCTGCCA----- mirR 18 3
-----AACAAAGTCCCAGTCTGCCACAT----- mirR 22 3
-----ACAAGTCCCAGTCTGCCACA----- mirR 20 2
-----CAACAAGTCCCAGTCTGCCACATG----- mirR 24 2
-----ACAACAAGTCCCAGTCTG----- mirR 18 2
-----AACAAAGTCCCAGTCTGCCAC----- mirR 20 1
-----CAACAAGTCCCAGTCTGC----- mirR 18 1
-----CAACAAGTCCCAGTCTGCC----- mirR 19 1
-----AACAAAGTCCCAGTCTGCCACATG----- mirR 23 1
-----CAACAACAAGTCCCAGTC----- mirR 18 1
-----TGGTGCTGGTCATTTTCAG---- morR 18 2
-----GTGCTGGTCATTTTCAGCAGC morR 20 2
-----TGCTGGTCATTTTCAGCAG- morR 18 1
-----GTGCTGGTCATTTTCAGCAG- morR 19 1

>mmu-mir-223
GCCATCTGCAGTGTACAGCTCCGCTGATTTGACAAGCTGAGTTGGACACTCTGTGTGGTAGAGTGTGAGTTTGTCAAATACCCCAAGTGTGGCTCATGCCTAT species len reads
---ATCTGCAGTGTACAGCTC----- morL 18 1
GCCATCTGCAGTGTACAGC----- morL 19 1
---TGCAAGTGTACAGCTCCGT----- morL 18 1
---CATCTGCAGTGTACAGCTC----- morL 19 1
-----CGTGTATTTGACAAGCTGAGTT----- mirL 22 1685
-----CGTGTATTTGACAAGCTGAGTTGG----- mirL 24 301
-----CGTGTATTTGACAAGCTGAGTTGGA----- mirL 25 254
-----CGTGTATTTGACAAGCTGAGTTGGAC----- mirL 26 220
-----CGTGTATTTGACAAGCTGAGTTGGACAC----- mirL 28 152
-----CGTGTATTTGACAAGCTGAGTTG----- mirL 23 149
-----CGTGTATTTGACAAGCTGAGTTGGACA----- mirL 27 123
-----CCGTGTATTTGACAAGCTGAGTTGGACAC----- mirL 29 21
-----CCGTGTATTTGACAAGCTGAGTTGGA----- mirL 26 18
-----CCGTGTATTTGACAAGCTGAGTT----- mirL 23 11
-----CCGTGTATTTGACAAGCTGAGTTG----- mirL 24 10
-----CCGTGTATTTGACAAGCTGAGTTGGACA----- mirL 28 10
-----GTGTATTTGACAAGCTGAGTT----- mirL 21 9
-----CCGTGTATTTGACAAGCTGAGT----- mirL 22 9
-----TGTATTTGACAAGCTGAGTT----- mirL 20 3
-----TGTATTTGACAAGCTGAG----- mirL 18 3
-----GTATTTGACAAGCTGAGT----- mirL 18 2
-----CCGTGTATTTGACAAGCTGAGTTGG----- mirL 25 2
-----CTCCGTGTATTTGACAAG----- mirL 18 1
-----TCCGTGTATTTGACAAGC----- mirL 18 1
-----TCCGTGTATTTGACAAGCT----- mirL 19 1
-----TGTATTTGACAAGCTGAGT----- mirL 19 1
-----ACACTCTGTGTGGTAGAG----- loop 18 2
-----ACACTCTGTGTGGTAGAGT----- loop 19 1
-----GGACACTCTGTGTGGTAG----- loop 18 1

```



```

-----GACACTCTGTGTGGTAGA----- loop 18 1
-----TGGACACTCTGTGTGGTA----- loop 18 1
-----TGTCAGTTTGTCAAATACCCCA----- mirR 22 91539
-----TGTCAGTTTGTCAAATACCCCAA----- mirR 23 66091
-----GTCAGTTTGTCAAATACCCCAA----- mirR 22 35108
-----GTCAGTTTGTCAAATACCCCA----- mirR 21 21335
-----TGTCAGTTTGTCAAATACCCC----- mirR 21 16030
-----TGTCAGTTTGTCAAATACCCCAAG----- mirR 24 7537
-----TGTCAGTTTGTCAAATACCC----- mirR 20 6465
-----GTCAGTTTGTCAAATACCCCAAG----- mirR 23 3321
-----GTGTCAGTTTGTCAAATACCCCA----- mirR 23 1782
-----GTCAGTTTGTCAAATACCCC----- mirR 20 1744
-----TGTCAGTTTGTCAAATACCCCAAGT----- mirR 25 1247
-----GTGTCAGTTTGTCAAATACCCCAA----- mirR 24 1093
-----GTGTCAGTTTGTCAAATACCCC----- mirR 22 1024
-----TGTCAGTTTGTCAAATACC----- mirR 19 742
-----GTCAGTTTGTCAAATACCC----- mirR 19 582
-----GTGTCAGTTTGTCAAATACCC----- mirR 21 515
-----GTCAGTTTGTCAAATACCCCAAGT----- mirR 24 277
-----GTGTCAGTTTGTCAAATACCCCAAG----- mirR 25 131
-----GTCAGTTTGTCAAATACCCCAAGTG----- mirR 25 70
-----TCAGTTTGTCAAATACCCCA----- mirR 20 61
-----TCAGTTTGTCAAATACCCCAA----- mirR 21 50
-----TCAGTTTGTCAAATACCCCAAG----- mirR 22 45
-----AGTGCAGTTTGTCAAATACCCC----- mirR 23 41
-----GTGTCAGTTTGTCAAATACC----- mirR 20 32
-----CAGTTTGTCAAATACCCCA----- mirR 19 31
-----AGTGCAGTTTGTCAAATACCCCA----- mirR 24 22
-----AGTGCAGTTTGTCAAATACCC----- mirR 22 15
-----TCAGTTTGTCAAATACCCCAAGT----- mirR 23 13
-----AGTGCAGTTTGTCAAATACCCCAA----- mirR 25 12
-----CAGTTTGTCAAATACCCCAA----- mirR 20 12
-----CAGTTTGTCAAATACCCC----- mirR 18 9
-----GTGTCAGTTTGTCAAATA----- mirR 18 5
-----TCAGTTTGTCAAATACCCC----- mirR 19 3
-----CAGTTTGTCAAATACCCCAAG----- mirR 21 2
-----GAGTGCAGTTTGTCAAATACCCCAA----- mirR 26 1
-----AGTGTGGCTCATGCCTAT morR 18 17

>mmu-mir-181a-1
GCCTCACAGGTTGCTTCAGTGAACATTC AACGCTGTCGGTGAGTTTGG AATTCAAATAAAAACCATCGACCGTTGATTGTACCCTATAGCTAACCATCATCTACTCCATGGCCCTC species len reads
-----CAGGTTGCTTCAGTGAAC----- morL 18 13
GCCTCACAGGTTGCTTCAGTGA----- morL 22 1
--CTCACAGGTTGCTTCAGTG----- morL 19 1
GCCTCACAGGTTGCTTCAG----- morL 19 1
--CTCACAGGTTGCTTCAGT----- morL 18 1

```

```

-----AACATTCAACGCTGTCGGTGAGT----- mirL 23 120958
-----AACATTCAACGCTGTCGGTGAGTTT----- mirL 25 46957
-----AACATTCAACGCTGTCGGTGAGTT----- mirL 24 17820
-----AACATTCAACGCTGTCGGTGAGTTTG----- mirL 26 15232
-----AACATTCAACGCTGTCGGTGAG----- mirL 22 7762
-----AACATTCAACGCTGTCGGTGAG----- mirL 21 6763
-----AACATTCAACGCTGTCGGTGAGTTTGG----- mirL 27 5775
-----ACATTCAACGCTGTCGGTGAGT----- mirL 22 674
-----ACATTCAACGCTGTCGGTGAGTTT----- mirL 24 532
-----ACATTCAACGCTGTCGGTGAGTT----- mirL 23 173
-----ACATTCAACGCTGTCGGTGAGTTTG----- mirL 25 114
-----ACATTCAACGCTGTCGGTGAG----- mirL 20 54
-----CATTCAACGCTGTCGGTGAGTTT----- mirL 23 31
-----ATTCAACGCTGTCGGTGAGTTT----- mirL 22 26
-----ACATTCAACGCTGTCGGTGAG----- mirL 21 26
-----CATTCAACGCTGTCGGTGAGTT----- mirL 22 24
-----GAACATTCAACGCTGTCGGTGAGT----- mirL 24 23
-----CATTCAACGCTGTCGGTGAGT----- mirL 21 21
-----ACATTCAACGCTGTCGGTGAGTTTGG----- mirL 26 20
-----GAACATTCAACGCTGTCGGTGAGTT----- mirL 25 17
-----ATTCAACGCTGTCGGTGAGT----- mirL 20 12
-----GAACATTCAACGCTGTCGGTGAGTTT----- mirL 26 8
-----GAACATTCAACGCTGTCGGTGAG----- mirL 23 8
-----ATTCAACGCTGTCGGTGAGTT----- mirL 21 8
-----GAACATTCAACGCTGTCGGTGAGTTTG----- mirL 27 8
-----ATTCAACGCTGTCGGTGAG----- mirL 19 6
-----CATTCAACGCTGTCGGTGAGTTTG----- mirL 24 3
-----ATTCAACGCTGTCGGTGAG----- mirL 18 3
-----GAACATTCAACGCTGTCGGTGAGTTTGG----- mirL 28 2
-----CATTCAACGCTGTCGGTGAG----- mirL 19 2
-----TGAACATTCAACGCTGTCGGTGAGTTT----- mirL 27 2
-----CATTCAACGCTGTCGGTGAG----- mirL 20 2
-----GAACATTCAACGCTGTCG----- mirL 18 1
-----GTGAACATTCAACGCTGTCGGTGAGT----- mirL 26 1
-----CATTCAACGCTGTCGGTG----- mirL 18 1
-----ATTCAACGCTGTCGGTGAGTTTG----- mirL 23 1
-----ATTCAACGCTGTCGGTGAGTTTGG----- mirL 24 1
-----TGGAATTCAAATAAAAAAC----- loop 18 4
-----GGAATTCAAATAAAAAACC----- loop 18 1
-----TTGAATTCAAATAAAAA----- loop 18 1
-----ACCATCGACCGTTGATTGTACC----- mirR 22 13789
-----ACCATCGACCGTTGATTGTAC----- mirR 21 1309
-----ACCATCGACCGTTGATTGTACCC----- mirR 23 387
-----ACCATCGACCGTTGATTGT----- mirR 19 84
-----ACCATCGACCGTTGATTGTA----- mirR 20 73
-----CCATCGACCGTTGATTGTACC----- mirR 21 56

```

```

-----AACCATCGACCGTTGATTGTAC----- mirR 22 50
-----ATCGACCGTTGATTGTACC----- mirR 19 23
-----AACCATCGACCGTTGATTGTACC----- mirR 23 20
-----CATCGACCGTTGATTGTACC----- mirR 20 19
-----ACCATCGACCGTTGATTGTACCCT----- mirR 24 12
-----ACCATCGACCGTTGATTG----- mirR 18 12
-----CCATCGACCGTTGATTGTAC----- mirR 20 10
-----AACCATCGACCGTTGATT----- mirR 18 7
-----AACCATCGACCGTTGATTGTA----- mirR 21 5
-----CCATCGACCGTTGATTGTACCC----- mirR 22 2
-----AAAACCATCGACCGTTGATTGT----- mirR 22 2
-----AAAACCATCGACCGTTGATTGTACCC----- mirR 26 1
-----ATCGACCGTTGATTGTAC----- mirR 18 1
-----AAACCATCGACCGTTGATTGT----- mirR 21 1
-----AACCATCGACCGTTGATTGT----- mirR 20 1
-----AACCATCGACCGTTGATTGTACCC----- mirR 24 1
-----CATCGACCGTTGATTGTACCCTAT----- mirR 24 1
-----ATCGACCGTTGATTGTACCCT----- mirR 21 1
-----CATCGACCGTTGATTGTA----- mirR 18 1
-----CTATAGCTAACCATCATCTACTCCATGGCCCTC morR 33 8
-----TAGCTAACCATCATCTAC----- morR 18 1

```

>mmu-mir-342

```

GTGAAAATGGGCTCAAGGTGAGGGTGCTATCTGTGATTGAGGGACATGGTCAATGGAATTGTCTCACACGAAATCGCACCCGTCACCTTGGCCTGCTGAGCACCA species len reads
GTGAAAATGGGCTCAAGGTGA----- morL 21 4
--GAAAATGGGCTCAAGGTG----- morL 18 2
-TGAAAATGGGCTCAAGGT----- morL 18 1
----AATGGGCTCAAGGTGAGG----- morL 18 1
-----AGGGTGCTATCTGTGATTGAGGGA----- mirL 25 796
-----AGGGTGCTATCTGTGATTGAGGGAC----- mirL 26 733
-----AGGGTGCTATCTGTGATTGAGGGACA----- mirL 27 592
-----GGGGTGCTATCTGTGATTGAGGGAC----- mirL 25 478
-----GGGGTGCTATCTGTGATTGAGGGACA----- mirL 26 433
-----GGGGTGCTATCTGTGATTGAGGGA----- mirL 24 378
-----AGGGTGCTATCTGTGATTGAGGG----- mirL 24 201
-----AGGGTGCTATCTGTGATTGA----- mirL 21 131
-----GGGGTGCTATCTGTGATTGAGGG----- mirL 23 82
-----AGGGTGCTATCTGTGATTGAG----- mirL 22 71
-----AGGGTGCTATCTGTGATTGAGG----- mirL 23 67
-----GGGGTGCTATCTGTGATTGAGGGACAT----- mirL 27 58
-----GGGGTGCTATCTGTGATTGAGG----- mirL 22 19
-----GGTGCTATCTGTGATTGA----- mirL 18 19
-----GGGGTGCTATCTGTGATTGAGGGACATG----- mirL 28 18
-----GGTGCTATCTGTGATTGAGGGAC----- mirL 23 10
-----GGGTGCTATCTGTGATTGAGGGA----- mirL 23 6
-----CATGGTCAATGGAATTGTC----- loop 19 12

```

```

-----GACATGGTCAATGGAATTGTC----- loop 21 6
-----TGGTCAATGGAATTGTCT----- loop 18 1
-----TCTCACACAGAAATCGCACCCGTC----- mir 24 63978
-----TCTCACACAGAAATCGCACCCGTC----- mir 25 58589
-----TCTCACACAGAAATCGCACCCGT----- mir 23 52049
-----TCACACAGAAATCGCACCCGTC----- mir 23 19579
-----TCTCACACAGAAATCGCACC----- mir 20 17045
-----TCTCACACAGAAATCGCACCCG----- mir 22 3901
-----TCTCACACAGAAATCGCACCCGTAC----- mir 26 3465
-----TCACACAGAAATCGCACCCGTC----- mir 22 3030
-----TCACACAGAAATCGCACCCGTAC----- mir 24 2163
-----TCACACAGAAATCGCACCCGT----- mir 21 1969
-----TCTCACACAGAAATCGCACCC----- mir 21 1402
-----CTCACACAGAAATCGCACCCGT----- mir 22 1219
-----CTCACACAGAAATCGCACCCGTC----- mir 24 1171
-----CTCACACAGAAATCGCACCCGTC----- mir 23 960
-----TCACACAGAAATCGCACC----- mir 18 572
-----TCACACAGAAATCGCACCCGTAC----- mir 25 300
-----CTCACACAGAAATCGCACC----- mir 19 277
-----CACACAGAAATCGCACCCGTC----- mir 22 218
-----CTCACACAGAAATCGCACCCGTAC----- mir 25 187
-----TCACACAGAAATCGCACCCGTACCT----- mir 26 112
-----CTCACACAGAAATCGCACCCG----- mir 21 99
-----CACACAGAAATCGCACCCGTC----- mir 21 57
-----CACACAGAAATCGCACCCGTAC----- mir 23 50
-----CTCACACAGAAATCGCACCC----- mir 20 48
-----CACACAGAAATCGCACCCGT----- mir 20 46
-----GTCTCACACAGAAATCGCACCCGT----- mir 24 17
-----CACACAGAAATCGCACCCG----- mir 19 14
-----CACACAGAAATCGCACCC----- mir 18 4
-----CACACAGAAATCGCACCCGTAC----- mir 24 3
-----GTCTCACACAGAAATCGCACC----- mir 21 3
-----GTCTCACACAGAAATCGCACCCGTAC----- mir 27 1
-----TGTCTCACACAGAAATCGCACCCGT----- mir 25 1
-----GTCTCACACAGAAATCGCACCC----- mir 22 1
-----CACCTGGCCTGCTGAGC----- morR 18 7
-----TTGGCCTGCTGAGCACCA----- morR 18 4
-----CACCTGGCCTGCTGAGCA----- morR 19 1
-----CTTGGCCTGCTGAGCACC----- morR 18 1
-----CCTTGGCCTGCTGAGCAC----- morR 18 1

>mmu-mir-222
AACTCTCAGAAGGATTAGGGTGCCCTCAGTGGCTCAGTAGCCAGTGTAGATCCTGTCTTTGGTAATCAGCAGCTACATCTGGCTACTGGGTCTCTGGTGGCATCATCTAGCTTCAGTT species len reads
-----AGGATTAGGGTGCCCTCAGT----- morL 20 33
-----TAGGGTGCCCTCAGTGGC----- morL 18 31
-----GGATTAGGGTGCCCTCAGT----- morL 19 27

```

```

-----GATTAGGGTGCCCTCAGTGGC----- morL 21 5
-----GATTAGGGTGCCCTCAGT----- morL 18 2
-----GGATTAGGGTGCCCTCAG----- morL 18 1
-----AAGGATTAGGGTGCCCTC----- morL 18 1
-----GATTAGGGTGCCCTCAGTG----- morL 19 1
AACTCTCAGAAGGATTAGGGTGCCCTC----- morL 27 1
-----GGCTCAGTAGCCAGTGTAGATCC----- mirL 23 3706
-----CTCAGTAGCCAGTGTAGATCC----- mirL 21 3262
-----GGCTCAGTAGCCAGTGTAGATC----- mirL 22 1786
-----CTCAGTAGCCAGTGTAGATCCT----- mirL 22 1159
-----CTCAGTAGCCAGTGTAGATC----- mirL 20 618
-----GGCTCAGTAGCCAGTGTAGAT----- mirL 21 292
-----TCAGTAGCCAGTGTAGATCCTGT----- mirL 23 277
-----GGCTCAGTAGCCAGTGTAGA----- mirL 20 181
-----TCAGTAGCCAGTGTAGATCCT----- mirL 21 154
-----GGCTCAGTAGCCAGTGTAGATCCT----- mirL 24 87
-----CTCAGTAGCCAGTGTAGAT----- mirL 19 67
-----TCAGTAGCCAGTGTAGATCCTG----- mirL 22 58
-----TCAGTAGCCAGTGTAGATCC----- mirL 20 44
-----CTCAGTAGCCAGTGTAGATCCTG----- mirL 23 26
-----TCAGTAGCCAGTGTAGATCCTGTC----- mirL 24 24
-----GGCTCAGTAGCCAGTGTAGATCCTGT----- mirL 26 17
-----TCAGTAGCCAGTGTAGATCCTGTCT----- mirL 25 11
-----TCAGTAGCCAGTGTAGATCCTGTCTTT----- mirL 27 11
-----GGCTCAGTAGCCAGTGTAGATCCTGTCTTTG----- mirL 31 9
-----TGGCTCAGTAGCCAGTGT----- mirL 18 5
-----CTCAGTAGCCAGTGTAGATCCTGT----- mirL 24 4
-----CTCAGTAGCCAGTGTAGA----- mirL 18 2
-----GCTCAGTAGCCAGTGTAGAT----- mirL 20 2
-----GCTCAGTAGCCAGTGTAGATCC----- mirL 22 1
-----TGTCTTTGGTAATCAGCA----- loop 18 7
-----TGTCTTTGGTAATCAGCAG----- loop 19 1
-----TGTCTTTGGTAATCAGCAGC----- loop 20 1
-----GTCTTTGGTAATCAGCAG----- loop 18 1
-----TCCTGTCTTTGGTAATCAGCAG----- loop 22 1
-----AGCTACATCTGGCTACTGGGTCT----- mirR 23 57439
-----AGCTACATCTGGCTACTGGGTCTCT----- mirR 25 56391
-----AGCTACATCTGGCTACTGGGTCTC----- mirR 24 39661
-----AGCTACATCTGGCTACTGGGTCTCTG----- mirR 26 14138
-----AGCTACATCTGGCTACTGGGTCT----- mirR 22 14135
-----AGCTACATCTGGCTACTGGGT----- mirR 21 13022
-----AGCTACATCTGGCTACTGGGTCTCTGG----- mirR 27 10027
-----GCAGCTACATCTGGCTACTGGGT----- mirR 23 5630
-----CAGCTACATCTGGCTACTGGGTCT----- mirR 24 3071
-----CAGCTACATCTGGCTACTGGGTCT----- mirR 23 2223
-----CAGCTACATCTGGCTACTGGGT----- mirR 22 1652

```

```

-----GCAGCTACATCTGGCTACTGGGTC----- mirR 24 924
-----GCAGCTACATCTGGCTACTGGG----- mirR 22 473
-----GCAGCTACATCTGGCTACTGGGTCT----- mirR 25 429
-----CAGCTACATCTGGCTACTGGGTCTC----- mirR 25 401
-----CAGCTACATCTGGCTACTGGGTCTCT----- mirR 26 266
-----GCAGCTACATCTGGCTACTGG----- mirR 21 233
-----CAGCTACATCTGGCTACTGGG----- mirR 21 209
-----GCTACATCTGGCTACTGGGTCT----- mirR 22 184
-----CTACATCTGGCTACTGGGTCTCT----- mirR 23 153
-----CTACATCTGGCTACTGGGTCTCTG----- mirR 24 150
-----CAGCTACATCTGGCTACTGG----- mirR 20 141
-----GCTACATCTGGCTACTGGGTCTC----- mirR 23 106
-----CTACATCTGGCTACTGGGTCT----- mirR 21 79
-----CTACATCTGGCTACTGGGTCTC----- mirR 22 77
-----GCTACATCTGGCTACTGGGTCTCT----- mirR 24 74
-----GCAGCTACATCTGGCTACTGGGTCTC----- mirR 26 68
-----CTACATCTGGCTACTGGGTCTCTGG----- mirR 25 60
-----CTACATCTGGCTACTGGGTCTCTGGT----- mirR 26 41
-----TACATCTGGCTACTGGGTCTC----- mirR 21 35
-----GCTACATCTGGCTACTGGGT----- mirR 20 23
-----GCAGCTACATCTGGCTACT----- mirR 19 22
-----GCTACATCTGGCTACTGGGT----- mirR 21 17
-----CTACATCTGGCTACTGGGT----- mirR 19 16
-----TACATCTGGCTACTGGGTCT----- mirR 20 12
-----TACATCTGGCTACTGGGT----- mirR 18 11
-----TACATCTGGCTACTGGGTCTCTGG----- mirR 24 10
-----TACATCTGGCTACTGGGTCTCT----- mirR 22 9
-----TACATCTGGCTACTGGGTCTCTG----- mirR 23 4
-----GCTACATCTGGCTACTGGGTCTCTG----- mirR 25 3
-----TACATCTGGCTACTGGGT----- mirR 19 2
-----AGCAGCTACATCTGGCTACTGGGTCTCT----- mirR 28 1
-----GCTACATCTGGCTACTGGG----- mirR 19 1
-----AGCAGCTACATCTGGCTAC----- mirR 19 1
-----TGGTGGCATCATCTAGCTTCAGTT morR 24 16
-----TGGTGGCATCATCTAGCTTCA--- morR 21 5
-----TGGTGGCATCATCTAGCTTC---- morR 20 1

```

>mmu-mir-181a-2

```

AGCCTTAAGAGGACTCCATGGAACATTCAACGCTGTGCGGTGAGTTTGGGATTCAAAAACAAAAAACCACCGACCGTTGACTGTACCTTGGGATTCTTACAGACAACA species len reads
AGCCTTAAGAGGACTCCA----- morL 18 1
-GCCTTAAGAGGACTCCAT----- morL 18 1
--CCTTAAGAGGACTCCATGG----- morL 19 1
-GCCTTAAGAGGACTCCATGG----- morL 20 1
-----AACATTCAACGCTGTGCGGTGAGT----- mirL 23 120959
-----AACATCAACGCTGTGCGGTGAGTT----- mirL 25 46957
-----AACATTCAACGCTGTGCGGTGAGTT----- mirL 24 17820

```

```

-----AACATTCAACGCTGTCGGTGAGTTTG----- mirL 26 15233
-----AACATTCAACGCTGTCGGTGAG----- mirL 22 7762
-----AACATTCAACGCTGTCGGTGA----- mirL 21 6763
-----AACATTCAACGCTGTCGGTGAGTTTG----- mirL 27 5775
-----ACATTCAACGCTGTCGGTGAGT----- mirL 22 674
-----ACATTCAACGCTGTCGGTGAGTT----- mirL 24 532
-----ACATTCAACGCTGTCGGTGAGTT----- mirL 23 173
-----ACATTCAACGCTGTCGGTGAGTTTG----- mirL 25 114
-----ACATTCAACGCTGTCGGTGA----- mirL 20 54
-----CATTCAACGCTGTCGGTGAGTT----- mirL 23 31
-----ACATTCAACGCTGTCGGTGAG----- mirL 21 26
-----ATTCAACGCTGTCGGTGAGTT----- mirL 22 26
-----CATTCAACGCTGTCGGTGAGTT----- mirL 22 24
-----GAACATTCAACGCTGTCGGTGAGT----- mirL 24 23
-----CATTCAACGCTGTCGGTGAGT----- mirL 21 21
-----ACATTCAACGCTGTCGGTGAGTTTG----- mirL 26 20
-----GAACATTCAACGCTGTCGGTGAGTT----- mirL 25 17
-----ATTCAACGCTGTCGGTGAGT----- mirL 20 12
-----GAACATTCAACGCTGTCGGTGAGTTTG----- mirL 27 8
-----GAACATTCAACGCTGTCGGTGAGTT----- mirL 26 8
-----GAACATTCAACGCTGTCGGTGAG----- mirL 23 8
-----ATTCAACGCTGTCGGTGAGTT----- mirL 21 8
-----ATTCAACGCTGTCGGTGAG----- mirL 19 6
-----CATTCAACGCTGTCGGTGAGTTTG----- mirL 24 3
-----ATTCAACGCTGTCGGTGA----- mirL 18 3
-----CATTCAACGCTGTCGGTGA----- mirL 19 2
-----GGAACATTCAACGCTGTCGGTGAGTT----- mirL 27 2
-----GAACATTCAACGCTGTCGGTGAGTTTG----- mirL 28 2
-----CATTCAACGCTGTCGGTGAG----- mirL 20 2
-----GGAACATTCAACGCTGTC----- mirL 18 1
-----CATTCAACGCTGTCGGTG----- mirL 18 1
-----GAACATTCAACGCTGTCG----- mirL 18 1
-----ATTCAACGCTGTCGGTGAGTTTG----- mirL 24 1
-----ATTCAACGCTGTCGGTGAGTTTG----- mirL 23 1
-----TGGAACATTCAACGCTGTC----- mirL 19 1
-----GGGATTCAAAAACAAAAA----- loop 19 8
-----TTGGGATTCAAAAACAAAAA----- loop 20 3
-----GGATTCAAAAACAAAAA----- loop 18 2
-----GGATTCAAAAACAAAAA----- loop 19 1
-----ACCACCGACCGTTGACTGTACC----- mirR 22 5473
-----ACCGACCGTTGACTGTACCTTG----- mirR 22 1219
-----ACCACCGACCGTTGACTGTAC----- mirR 21 543
-----ACCACCGACCGTTGACTGTACCT----- mirR 23 373
-----ACCACCGTTGACTGTACCT----- mirR 21 167
-----ACCACCGACCGTTGACTGTA----- mirR 20 103
-----ACCACCGACCGTTGACTGT----- mirR 19 82

```

```

-----AACCACCGACCGTTGACTGTAC----- mirR 22 67
-----ACCGACCGTTGACTGTACCT----- mirR 20 27
-----AACCACCGACCGTTGACTGTACC----- mirR 23 25
-----ACCACCGACCGTTGACTGT----- mirR 18 20
-----ACCACCGACCGTTGACTGTACCTT----- mirR 24 18
-----CCACCGACCGTTGACTGTACC----- mirR 21 14
-----ACCGACCGTTGACTGTACC----- mirR 19 14
-----CACCGACCGTTGACTGTACC----- mirR 20 4
-----AACCACCGACCGTTGACTGTA----- mirR 21 3
-----AACCACCGACCGTTGACTGT----- mirR 19 3
-----ACCGACCGTTGACTGTAC----- mirR 18 2
-----CACCGACCGTTGACTGTAC----- mirR 19 1
-----AAAACCACCGACCGTTGACTGT----- mirR 22 1
-----AACCACCGACCGTTGACTGT----- mirR 20 1
-----ACCGACCGTTGACTGTACCTTGG----- mirR 23 1
-----AAACCACCGACCGTTGAC----- mirR 18 1
-----AAAACCACCGACCGTTGACTGTAC----- mirR 24 1
-----CCACCGACCGTTGACTGTACCT----- mirR 22 1
-----TTGGGATTCTTACAGACAACA morR 21 4
-----TTGGGATTCTTACAGACAAC- morR 20 4
-----ACCTTGGGATTCTTACAG----- morR 18 3
-----GGGATTCTTACAGACAAC- morR 18 1
-----CTTGGGATTCTTACAGAC--- morR 18 1

```

>mmu-mir-20b

```

AGAACAAGCTCGGATCCTAGTAGTGCCAAAGTGCTCATAGTGCAGGTAGTTTTTATACCACTCTACTGCAGTGTGAGCACTTCTAGTACTCCTGGATCAACCAAG species len reads
-----AAGCTCGGATCCTAGTAGTGC----- morL 21 52
-----AGCTCGGATCCTAGTAGTGC----- morL 20 52
-----AGCTCGGATCCTAGTAGTG----- morL 19 20
-----AAGCTCGGATCCTAGTAGTGCC----- morL 22 12
-----AGCTCGGATCCTAGTAGTGCC----- morL 21 8
-----AAGCTCGGATCCTAGTAGTG----- morL 20 4
-----CTCGGATCCTAGTAGTGC----- morL 18 3
-----AGCTCGGATCCTAGTAGT----- morL 18 2
-----CAAGCTCGGATCCTAGTAGTGCC----- morL 23 2
AGAACAAGCTCGGATCCTAGTAGTG----- morL 26 1
-----AGCTCGGATCCTAGTAGTGCCA----- morL 22 1
-----AGCTCGGATCCTAGTAGTGCCAA----- morL 23 1
-----AAGCTCGGATCCTAGTAGTGCCA----- morL 23 1
-----GCTCGGATCCTAGTAGTGC----- morL 19 1
-----CAAAGTGCTCATAGTGCAGGTAG----- mirL 23 146462
-----CAAAGTGCTCATAGTGCAGGTAGT----- mirL 24 28377
-----CAAAGTGCTCATAGTGCAGGT----- mirL 21 17503
-----CAAAGTGCTCATAGTGCAGGTA----- mirL 22 14597
-----CAAAGTGCTCATAGTGCAGG----- mirL 20 2005
-----CAAAGTGCTCATAGTGCAGGTAGTT----- mirL 25 1848

```



```

-----CAAAGTGCTCATAGTGCAG----- mirL 19 843
-----AGTGCTCATAGTGCAGGT----- mirL 18 180
-----AGTGCTCATAGTGCAGGTA----- mirL 19 156
-----AAAGTGCTCATAGTGCAGGTAG----- mirL 22 138
-----AGTGCTCATAGTGCAGGTAG----- mirL 20 111
-----AAGTGCTCATAGTGCAGGT----- mirL 19 78
-----AAGTGCTCATAGTGCAGGTA----- mirL 20 73
-----AAGTGCTCATAGTGCAGGTAG----- mirL 21 72
-----CCAAAGTGCTCATAGTGCAGGTAG----- mirL 24 48
-----AAGTGCTCATAGTGCAGG----- mirL 18 40
-----AAAGTGCTCATAGTGCAGGTA----- mirL 21 39
-----AAAGTGCTCATAGTGCAGGTAGT----- mirL 23 37
-----AAAGTGCTCATAGTGCAGGT----- mirL 20 34
-----AAAGTGCTCATAGTGCAGGTAGTT----- mirL 24 15
-----GCCAAAGTGCTCATAGTGCAGGTAG----- mirL 25 14
-----CCAAAGTGCTCATAGTGCAGGT----- mirL 22 12
-----GCCAAAGTGCTCATAGTGCAGGTA----- mirL 24 9
-----TGCCAAAGTGCTCATAGTGCAGGTAG----- mirL 26 9
-----AAGTGCTCATAGTGCAGGTAGT----- mirL 22 7
-----GCCAAAGTGCTCATAGTGCAGGT----- mirL 23 4
-----AAAGTGCTCATAGTGCAGGTAGTTTT----- mirL 26 2
-----CCAAAGTGCTCATAGTGCAGGTA----- mirL 23 1
-----AAGTGCTCATAGTGCAGGTAGTT----- mirL 23 1
-----CCAAAGTGCTCATAGTGCAGG----- mirL 21 1
-----CCAAAGTGCTCATAGTGCAGGTAGT----- mirL 25 1
-----CCAAAGTGCTCATAGTGCA----- mirL 19 1
-----TGCCAAAGTGCTCATAGTGCAGG----- mirL 23 1
-----GTTTTTATACCACTCTAC----- loop 18 3
-----ACTGCAGTGTGAGCACTTCTAGT----- mirR 23 7629
-----ACTGCAGTGTGAGCACTTCTAG----- mirR 22 3265
-----ACTGCAGTGTGAGCACTTCTA----- mirR 21 1792
-----ACTGCAGTGTGAGCACTTCTAGTA----- mirR 24 841
-----ACTGCAGTGTGAGCACTTCT----- mirR 20 528
-----ACTGCAGTGTGAGCACTTC----- mirR 19 211
-----CTGCAGTGTGAGCACTTCTAGT----- mirR 22 92
-----ACTGCAGTGTGAGCACTT----- mirR 18 73
-----CTGCAGTGTGAGCACTTCTAG----- mirR 21 29
-----TCTACTGCAGTGTGAGCACTTCT----- mirR 23 18
-----CTGCAGTGTGAGCACTTCTA----- mirR 20 14
-----TACTGCAGTGTGAGCACTTCTAGT----- mirR 24 13
-----GCAGTGTGAGCACTTCTA----- mirR 18 11
-----TACTGCAGTGTGAGCACTTCTAG----- mirR 23 9
-----TGCAGTGTGAGCACTTCTA----- mirR 19 7
-----CTGCAGTGTGAGCACTTCTAGTA----- mirR 23 7
-----TGCAGTGTGAGCACTTCTAG----- mirR 20 6
-----TACTGCAGTGTGAGCACTTCTAGTA----- mirR 25 5

```

```

-----CTACTGCAGTGTGAGCACTTCTAGT----- mirR 25 4
-----TCTACTGCAGTGTGAGCACTTC----- mirR 22 3
-----TCTACTGCAGTGTGAGCACTTCTA----- mirR 24 3
-----TACTGCAGTGTGAGCACTTCTA----- mirR 22 3
-----CTACTGCAGTGTGAGCACTTCT----- mirR 22 3
-----CTGCAGTGTGAGCACTTCT----- mirR 19 3
-----TCTACTGCAGTGTGAGCACTT----- mirR 21 2
-----TACTGCAGTGTGAGCACTTCT----- mirR 21 1
-----GCAGTGTGAGCACTTCTAGT----- mirR 20 1
-----TCTACTGCAGTGTGAGCACTTCTAG----- mirR 25 1
-----TACTGCAGTGTGAGCACTT----- mirR 19 1
-----TCTACTGCAGTGTGAGCAC----- mirR 19 1
-----TGCAGTGTGAGCACTTCTAGTA----- mirR 22 1
-----ACTCCTGGATCAACCAAG morR 18 2

>mmu-mir-151
ACAGATGATGGAGCGCTTTCCTGCCCTCGAGGAGCTCACAGTCTAGTATGTCTCCTCCCTACTAGACTGAGGCTCCTTGAGGACAGGGATCGTCATACTCACCTCC species len reads
-----TGGAGCGCTTTCCTGCCC----- morL 18 40
-----GATGGAGCGCTTTCCTGCCC----- morL 20 15
-----TGGAGCGCTTTCCTGCCCT----- morL 19 8
-----ATGGAGCGCTTTCCTGCCC----- morL 19 7
-----ATGGAGCGCTTTCCTGCCCT----- morL 20 4
-----ATGGAGCGCTTTCCTGCC----- morL 18 3
ACAGATGATGGAGCGCTTTCCTGCCCTC----- morL 28 2
-----GGAGCGCTTTCCTGCCCT----- morL 18 1
-----TGATGGAGCGCTTTCCTG----- morL 18 1
-----GAGCGCTTTCCTGCCCTCG----- morL 19 1
-----GATGGAGCGCTTTCCTGC----- morL 18 1
-----TCGAGGAGCTCACAGTCTAGTA----- mirL 22 101306
-----TCGAGGAGCTCACAGTCTAGT----- mirL 21 73654
-----TCGAGGAGCTCACAGTCTAGTAT----- mirL 23 14152
-----TCGAGGAGCTCACAGTCTAG----- mirL 20 7759
-----CGAGGAGCTCACAGTCTAGTA----- mirL 21 1650
-----TCGAGGAGCTCACAGTCTA----- mirL 19 1427
-----TCGAGGAGCTCACAGTCTAGTATG----- mirL 24 1353
-----CTCGAGGAGCTCACAGTCTAGTA----- mirL 23 1314
-----CTCGAGGAGCTCACAGTCTAGT----- mirL 22 1232
-----CGAGGAGCTCACAGTCTAGT----- mirL 20 883
-----TCGAGGAGCTCACAGTCT----- mirL 18 429
-----CGAGGAGCTCACAGTCTAGTAT----- mirL 22 373
-----CGAGGAGCTCACAGTCTAG----- mirL 19 285
-----CTCGAGGAGCTCACAGTCTAGTAT----- mirL 24 220
-----CCTCGAGGAGCTCACAGTCTAGT----- mirL 23 140
-----CCTCGAGGAGCTCACAGTCTAGTA----- mirL 24 121
-----AGGAGCTCACAGTCTAGTA----- mirL 19 111
-----GAGGAGCTCACAGTCTAGTA----- mirL 20 104

```

```

-----CGAGGAGCTCACAGTCTAGTATG----- mirL 23 96
-----AGGAGCTCACAGTCTAGT----- mirL 18 70
-----CCCTCGAGGAGCTCACAGTCTAG----- mirL 23 67
-----CGAGGAGCTCACAGTCTA----- mirL 18 57
-----CTCGAGGAGCTCACAGTCTAG----- mirL 21 47
-----GAGGAGCTCACAGTCTAGT----- mirL 19 40
-----CCTCGAGGAGCTCACAGTCTAG----- mirL 22 34
-----GAGGAGCTCACAGTCTAG----- mirL 18 24
-----CCTCGAGGAGCTCACAGTCTAGTAT----- mirL 25 21
-----CTCGAGGAGCTCACAGTCTAGTATG----- mirL 25 17
-----CCCTCGAGGAGCTCACAGTCTAGT----- mirL 24 9
-----CCTCGAGGAGCTCACAGTCTAGTATG----- mirL 26 7
-----CGAGGAGCTCACAGTCTAGTATGT----- mirL 24 7
-----CTCGAGGAGCTCACAGTC----- mirL 18 6
-----CTCGAGGAGCTCACAGTCTA----- mirL 20 6
-----CCCTCGAGGAGCTCACAGTCTAGTA----- mirL 25 4
-----GAGGAGCTCACAGTCTAGTATG----- mirL 22 4
-----CCCTCGAGGAGCTCACAGTCTA----- mirL 22 2
-----AGGAGCTCACAGTCTAGTAT----- mirL 20 2
-----CCTCGAGGAGCTCACAGTCT----- mirL 20 1
-----CCCTCGAGGAGCTCACAGTCT----- mirL 21 1
-----CCTCGAGGAGCTCACAGTCTA----- mirL 21 1
-----CCCTCGAGGAGCTCACAGTCTAGTAT----- mirL 26 1
-----GAGGAGCTCACAGTCTAGTAT----- mirL 21 1
-----TAGTCTCCTCCCTACTA----- loop 18 1
-----CTAGACTGAGGCTCCTTGAGGA----- mirR 22 4939
-----CTAGACTGAGGCTCCTTGAGGAC----- mirR 23 4777
-----CTAGACTGAGGCTCCTTGAGG----- mirR 21 3181
-----CTAGACTGAGGCTCCTTGAGGACA----- mirR 24 3171
-----CTAGACTGAGGCTCCTTGA----- mirR 19 1123
-----CTAGACTGAGGCTCCTTGAG----- mirR 20 609
-----CTAGACTGAGGCTCCTTGAGGACAG----- mirR 25 383
-----ACTAGACTGAGGCTCCTTGAGG----- mirR 22 355
-----ACTAGACTGAGGCTCCTTGAG----- mirR 21 249
-----ACTAGACTGAGGCTCCTTGA----- mirR 20 229
-----TAGACTGAGGCTCCTTGAGGAC----- mirR 22 85
-----ACTAGACTGAGGCTCCTTG----- mirR 19 67
-----TACTAGACTGAGGCTCCTTGA----- mirR 21 65
-----ACTAGACTGAGGCTCCTTGAGGA----- mirR 23 49
-----ACTAGACTGAGGCTCCTT----- mirR 18 44
-----TACTAGACTGAGGCTCCTTGAG----- mirR 22 42
-----AGACTGAGGCTCCTTGAGGACA----- mirR 22 41
-----TACTAGACTGAGGCTCCTTGAGG----- mirR 23 40
-----ACTAGACTGAGGCTCCTTGAGGAC----- mirR 24 38
-----TAGACTGAGGCTCCTTGAGGACA----- mirR 23 35
-----TACTAGACTGAGGCTCCTTGAGGA----- mirR 24 22

```

```

-----TAGACTGAGGCTCCTTGAGGA----- mirR 21 20
-----GACTGAGGCTCCTTGAGGAC----- mirR 20 17
-----AGACTGAGGCTCCTTGAGGAC----- mirR 21 15
-----TAGACTGAGGCTCCTTGA----- mirR 18 12
-----TAGACTGAGGCTCCTTGAGG----- mirR 20 10
-----AGACTGAGGCTCCTTGAG----- mirR 18 10
-----TACTAGACTGAGGCTCCTTGAGGAC----- mirR 25 8
-----TACTAGACTGAGGCTCCTTG----- mirR 20 6
-----AGACTGAGGCTCCTTGAGG----- mirR 19 6
-----TAGACTGAGGCTCCTTGAG----- mirR 19 5
-----GACTGAGGCTCCTTGAGG----- mirR 18 4
-----TACTAGACTGAGGCTCCT----- mirR 18 4
-----AGACTGAGGCTCCTTGAGGACAG----- mirR 23 1
-----TAGACTGAGGCTCCTTGAGGACAG----- mirR 24 1
-----CTACTAGACTGAGGCTCC----- mirR 18 1
-----AGACTGAGGCTCCTTGAGGACAGG----- mirR 24 1
-----AGGGATCGTCATACTCACCT-- morR 20 1
-----AGGGATCGTCATACTCACCTCC morR 22 1
-----ACAGGGATCGTCATACTCACC--- morR 21 1
-----CAGGGATCGTCATACTCAC--- morR 19 1
-----ACAGGGATCGTCATACTCACCT-- morR 22 1

```

>mmu-mir-30a

```

GAAGAAGGCATATCAACGTTGACAGTGAGCGACTGTAAACATCCTCGACTGGAAGCTGTGAAGCCACAAATGGGCTTTCAGTCGGATGTTGACAGCTGCCTACTGCCTCCAATTCA species len reads
-----CAACGTTGACAGTGAGCGACT----- morL 20 28
-----ACGTTGACAGTGAGCGACT----- morL 19 2
-----CGTTGACAGTGAGCGACT----- morL 18 2
-----CAACGTTGACAGTGAGCGACT----- morL 21 1
GAAGAAGGCATATCAACGTTGACAGTGAGCGACT----- morL 33 1
-----AACGTTGACAGTGAGCGACT----- morL 19 1
-----TGTA AACATCCTCGACTGGAAGCT----- mirL 24 94687
-----TGTA AACATCCTCGACTGGAAGC----- mirL 23 45217
-----TGTA AACATCCTCGACTGGAAG----- mirL 22 14263
-----TGTA AACATCCTCGACTGGAAGCTG----- mirL 25 13100
-----TGTA AACATCCTCGACTGGAAGCTGT----- mirL 26 6851
-----GTA AACATCCTCGACTGGAAGCT----- mirL 23 6759
-----TGTA AACATCCTCGACTGGA----- mirL 21 4004
-----GTA AACATCCTCGACTGGAAGCTG----- mirL 24 2549
-----GTA AACATCCTCGACTGGAAGC----- mirL 22 2496
-----GTA AACATCCTCGACTGGAAGCTGT----- mirL 25 2085
-----TGTA AACATCCTCGACTGGA----- mirL 20 990
-----GTA AACATCCTCGACTGGAAG----- mirL 21 763
-----GTA AACATCCTCGACTGGA----- mirL 20 338
-----GTA AACATCCTCGACTGGAAGCTGT----- mirL 26 252
-----TAAACATCCTCGACTGGAAGCT----- mirL 22 128
-----TAAACATCCTCGACTGGAAGCTG----- mirL 23 89

```

```

-----AAACATCCTCGACTGGAAGC----- mirL 20 46
-----CTGTAAACATCCTCGACTGGAAGCT----- mirL 25 30
-----TAAACATCCTCGACTGGAAGCTGT----- mirL 24 21
-----CTGTAAACATCCTCGACTGGAAGC----- mirL 24 18
-----TAAACATCCTCGACTGGAAG----- mirL 20 14
-----TAAACATCCTCGACTGGAAGC----- mirL 21 14
-----AAACATCCTCGACTGGAAGCT----- mirL 21 14
-----ACTGTAAACATCCTCGACTGGAA----- mirL 23 12
-----GACTGTAAACATCCTCGACTGGAAGCT----- mirL 27 11
-----AAACATCCTCGACTGGAAGCTG----- mirL 22 11
-----TAAACATCCTCGACTGGA----- mirL 18 9
-----AAACATCCTCGACTGGAAG----- mirL 19 7
-----AAACATCCTCGACTGGAAGCTGT----- mirL 23 7
-----CTGTAAACATCCTCGACTGGAAG----- mirL 23 6
-----GACTGTAAACATCCTCGACTGGAAGC----- mirL 26 6
-----AAACATCCTCGACTGGAA----- mirL 18 5
-----TAAACATCCTCGACTGGAAGCTGTG----- mirL 25 4
-----ACTGTAAACATCCTCGACTGGAAGCT----- mirL 26 4
-----CTGTAAACATCCTCGACTGGAAGCTG----- mirL 26 4
-----GACTGTAAACATCCTCGACTGGA----- mirL 23 2
-----CTGTAAACATCCTCGACTGGAAGCTGT----- mirL 27 1
-----TGTGAAGCCACAAATGGG----- loop 18 1
-----CTTTCAGTCGGATGTTTGCAGC----- mirR 22 10886
-----CTTTCAGTCGGATGTTTGCAGCT----- mirR 23 1660
-----CTTTCAGTCGGATGTTTGCAG----- mirR 21 1435
-----TTTCAGTCGGATGTTTGCAGC----- mirR 21 306
-----CTTTCAGTCGGATGTTTGCAGCTG----- mirR 24 281
-----CTTTCAGTCGGATGTTTGC----- mirR 19 257
-----CTTTCAGTCGGATGTTTGC----- mirR 20 182
-----TTTCAGTCGGATGTTTGCAGCT----- mirR 22 127
-----TTTCAGTCGGATGTTTGCAG----- mirR 20 86
-----CTTTCAGTCGGATGTTTGCAGCTGC----- mirR 25 70
-----GCTTTCAGTCGGATGTTTGCAGC----- mirR 23 42
-----TTCAGTCGGATGTTTGCAGC----- mirR 20 39
-----TTTCAGTCGGATGTTTGCAGCTG----- mirR 23 25
-----TTTCAGTCGGATGTTTGCAGCT----- mirR 21 17
-----GCTTTCAGTCGGATGTTTGCAG----- mirR 22 15
-----TTTCAGTCGGATGTTTGC----- mirR 18 13
-----TCAGTCGGATGTTTGCAGCTGC----- mirR 22 9
-----GCTTTCAGTCGGATGTTTGCAGCT----- mirR 24 5
-----TTCAGTCGGATGTTTGCAGCTGC----- mirR 23 4
-----TTCAGTCGGATGTTTGCAGCTG----- mirR 22 4
-----TTCAGTCGGATGTTTGCAG----- mirR 19 4
-----TTTCAGTCGGATGTTTGCAGCTGC----- mirR 24 4
-----TTTCAGTCGGATGTTTGCAGCTGCC----- mirR 25 3
-----TCAGTCGGATGTTTGCAGCT----- mirR 20 3

```

```

-----GCTTTCAGTCGGATGTTTG----- mirR 19 2
-----GCTTTCAGTCGGATGTTGC----- mirR 20 1
-----GGCTTTCAGTCGGATGTTGCAG----- mirR 23 1
-----GGCTTTCAGTCGGATGTT----- mirR 18 1
-----CTACTGCCTCCAACTTCA morR 18 2
-----CTGCCTACTGCCTCCAACTTC- morR 21 1
-----CTGCCTACTGCCTCCAAC---- morR 18 1
-----GCCTACTGCCTCCAACTT-- morR 18 1
-----AGCTGCCTACTGCCTCCA---- morR 18 1

```

>mmu-mir-574

| CCCTGCGTGGGTGCGGGCGTGTGAGTGTGTGTGTGAGTGTGTGTGCGCTCCAAGTCCACGCTCATGCACACACCCACACGCCCGCACGCCCGGTCTGCACCCTCGTCC | species | len | reads |
|--------------------------------------------------------------------------------------------------------------|---------|-----|-------|
| --CTGCGTGGGTGCGGGCGTGTG                                                                                      | morL    | 19  | 3     |
| --CTGCGTGGGTGCGGGCGTGT                                                                                       | morL    | 20  | 2     |
| -CCTGCGTGGGTGCGGGCGTGT                                                                                       | morL    | 20  | 2     |
| CCCTGCGTGGGTGCGGGCGTGT                                                                                       | morL    | 21  | 2     |
| ---TGCCTGGGTGCGGGCGTGT                                                                                       | morL    | 18  | 1     |
| ---GCGTGGGTGCGGGCGTGT                                                                                        | morL    | 18  | 1     |
| ----CGTGGGTGCGGGCGTGTG                                                                                       | morL    | 18  | 1     |
| -----TGAGTGTGTGTGTGAGTGTGT                                                                                   | mirL    | 23  | 17642 |
| -----TGAGTGTGTGTGTGAGTGTGTGT                                                                                 | mirL    | 25  | 8404  |
| -----TGAGTGTGTGTGTGAGTGTGTG                                                                                  | mirL    | 24  | 7755  |
| -----TGAGTGTGTGTGTGAGTGT                                                                                     | mirL    | 21  | 5052  |
| -----TGAGTGTGTGTGTGAGTGTG                                                                                    | mirL    | 22  | 2363  |
| -----TGAGTGTGTGTGTGAGTGTGTGTC                                                                                | mirL    | 26  | 1521  |
| -----TGAGTGTGTGTGTGAGTGTGTGTCG                                                                               | mirL    | 27  | 1035  |
| -----GAGTGTGTGTGTGAGTGTGT                                                                                    | mirL    | 22  | 608   |
| -----GAGTGTGTGTGTGAGTGTGTGT                                                                                  | mirL    | 24  | 313   |
| -----GAGTGTGTGTGTGAGTGTGTG                                                                                   | mirL    | 23  | 293   |
| -----GAGTGTGTGTGTGAGTGT                                                                                      | mirL    | 20  | 145   |
| -----GAGTGTGTGTGTGAGTGTG                                                                                     | mirL    | 21  | 89    |
| -----GAGTGTGTGTGTGAGTGTGTGCG                                                                                 | mirL    | 26  | 36    |
| -----GAGTGTGTGTGTGAGTGTGTGTC                                                                                 | mirL    | 25  | 27    |
| -----GTGTGTGTGTGTGAGTGTGTGT                                                                                  | mirL    | 22  | 11    |
| -----GTGAGTGTGTGTGTGAGTGT                                                                                    | mirL    | 22  | 6     |
| -----AGTGTGTGTGTGTGAGTGTGT                                                                                   | mirL    | 21  | 6     |
| -----AGTGTGTGTGTGTGAGTGTGTGT                                                                                 | mirL    | 23  | 5     |
| -----AGTGTGTGTGTGTGAGTGT                                                                                     | mirL    | 19  | 4     |
| -----GTGTGTGTGTGTGAGTGTGTG                                                                                   | mirL    | 21  | 3     |
| -----GTGTGTGTGTGTGAGTGTGT                                                                                    | mirL    | 20  | 2     |
| -----AGTGTGTGTGTGTGAGTGT                                                                                     | mirL    | 18  | 2     |
| -----AGTGTGTGTGTGTGAGTGTG                                                                                    | mirL    | 20  | 2     |
| -----GTGAGTGTGTGTGTGAGTGTGTGT                                                                                | mirL    | 26  | 2     |
| -----AGTGTGTGTGTGTGAGTGTGTG                                                                                  | mirL    | 22  | 2     |
| -----GTGTGTGTGTGTGAGTGTG                                                                                     | mirL    | 19  | 1     |
| -----GTGTGAGTGTGTGTGTGAG                                                                                     | mirL    | 21  | 1     |

```

-----TGTGAGTGTGTGTGTGTG----- mirL 18 1
-----GTGTGAGTGTGTGTGTGT----- mirL 18 1
-----GTGAGTGTGTGTGTGTGAGTGTGT----- mirL 24 1
-----GTGTGAGTGTGTGTGTGTGAGTGTGTGTC----- mirL 29 1
-----GTGAGTGTGTGTGTGTGAGTGTG----- mirL 23 1
-----TGTGAGTGTGTGTGTGTGAGTG----- mirL 22 1
-----GTGAGTGTGTGTGTGTGAGTG----- mirL 21 1
-----CACGCTCATGCACACACCCACA----- mirR 22 114396
-----CACGCTCATGCACACACCCAC----- mirR 21 18446
-----CACGCTCATGCACACACCCACAC----- mirR 23 17945
-----CACGCTCATGCACACACCCA----- mirR 20 7560
-----CACGCTCATGCACACACCCACACG----- mirR 24 2755
-----ACGCTCATGCACACACCCACA----- mirR 21 596
-----CACGCTCATGCACACACCC----- mirR 19 546
-----CACGCTCATGCACACACCCACACG----- mirR 25 398
-----ACGCTCATGCACACACCCACAC----- mirR 22 193
-----TCCACGCTCATGCACACACCCA----- mirR 22 163
-----CGCTCATGCACACACCCAC----- mirR 19 153
-----ACGCTCATGCACACACCCAC----- mirR 20 148
-----TCCACGCTCATGCACACACCCAC----- mirR 23 80
-----GTCATGCACACACCCACA----- mirR 19 63
-----CCACGCTCATGCACACACCCAC----- mirR 22 60
-----CGCTCATGCACACACCCACA----- mirR 20 57
-----CCACGCTCATGCACACACCCA----- mirR 21 54
-----ACGCTCATGCACACACCCA----- mirR 19 53
-----CGCTCATGCACACACCCA----- mirR 18 48
-----GTCATGCACACACCCAC----- mirR 18 47
-----CGCTCATGCACACACCCACAC----- mirR 21 44
-----CGCTCATGCACACACCCACACG----- mirR 22 36
-----CCACGCTCATGCACACACCCACA----- mirR 23 27
-----ACGCTCATGCACACACCCACACG----- mirR 23 27
-----TCCACGCTCATGCACACACCCACA----- mirR 24 20
-----ACGCTCATGCACACACCCACACG----- mirR 24 19
-----TCCACGCTCATGCACACACCCACACG----- mirR 26 12
-----TCCACGCTCATGCACACACCC----- mirR 21 9
-----ACGCTCATGCACACACCC----- mirR 18 7
-----TCCACGCTCATGCACACACC----- mirR 20 3
-----CCACGCTCATGCACACACCCACAC----- mirR 24 2
-----CGCTCATGCACACACCCACACG----- mirR 23 2
-----TCCACGCTCATGCACACACCCACAC----- mirR 25 2
-----GTCCACGCTCATGCACACACCCACA----- mirR 25 1
-----GTCATGCACACACCCACAC----- mirR 20 1
-----CCACGCTCATGCACACACCC----- mirR 20 1
-----ACGCCCGCACGCCCGGTC----- morR 18 10
-----CGCCCGCACGCCCGGTCTGCAC----- morR 22 2
-----CGCCCGCACGCCCGGTCTGCA----- morR 21 2

```

```
-----CCCCGCACGCCCGGTCTGCA----- morR 19 1
-----CGCCCGCACGCCCGGTCTGC----- morR 20 1
-----CGCCCGCACGCCCGGTCTGCACCCTCGT-- morR 28 1
-----CGCCCGCACGCCCGGTCTGCACCCT----- morR 25 1
-----ACACGCCCGCACGCCCGG----- morR 18 1
-----ACGCCCGCACGCCCGGTCTG----- morR 20 1
-----CGCCCGCACGCCCGGTCTGCACCCTCGTCC morR 30 1
```

>mmu-mir-1965

```
CCCAAGAGCTGGGATTAAGGCTTGCGCCACCATGCCTGGCTCTTTTGTTTTGTATTGTGATCCTAGATCCCATCATGTGAACATCTAGATTTAGCATCACAATCAGGAACCTGTAAGCCGGGCCGTAGTGGCGCAAG
CCCAAGAGCTGGGATTAAGGC-----
-----GCTGGGATTAAGGCTTGC-----
-----TGCGCCACCATGCCTGGCTC-----
-----GCCACCATGCCTGGCTCTTT-----
-----CTTGCGCCACCATGCCTGGCTCT-----
-----CTTGCGCCACCATGCCTGGCTC-----
-----TGCGCCACCATGCCTGGCT-----
-----CGCCACCATGCCTGGCTCTT-----
-----GCGCCACCATGCCTGGCT-----
-----TGCGCCACCATGCCTGGCTCTT-----
-----TGCGCCACCATGCCTGGC-----
-----GCGCCACCATGCCTGGCTCTT-----
-----TGCGCCACCATGCCTGGCTCT-----
-----AG-----
-----AG-----
-----AG-----
-----AG-----
-----AG-----
-----AG-----
-----AG-----
-----AAG-----
-----AAG-----
-----AAG-----
-----G-----
-----G-----
-----AAG-----
-----AAG-----
-----G-----
-----AAG-----
-----G-----
-----G-----
```



-----  
-----  
-----  
-----G  
-----AAG  
-----  
-----CAAG  
-----  
-----G  
-----CAAG  
-----  
-----CAAG  
-----GCAAG  
-----  
-----  
-----  
-----

>mmu-mir-296

|                                                                                                                           | species | len | read   |
|---------------------------------------------------------------------------------------------------------------------------|---------|-----|--------|
| ATGTGGAAGGTGACAAGAGGGCCTTTCTGGAGGGCCCCCCTCAATCCTGTTGTGCTCGCTTCAGAGGGTTGGGTGGAGGCTCTCCTGAAGGTGTCCGCAGAGCGTCGCATGGTAAGTAGTC | morL    | 18  | 401    |
| -----ACAAGAGGGCCTTTCTGG-----                                                                                              | morL    | 19  | 30     |
| -----ACAAGAGGGCCTTTCTGGA-----                                                                                             | morL    | 19  | 25     |
| -----GACAAGAGGGCCTTTCTGG-----                                                                                             | morL    | 20  | 9      |
| -----TGACAAGAGGGCCTTTCTGG-----                                                                                            | morL    | 21  | 5      |
| -----GTGACAAGAGGGCCTTTCTGG-----                                                                                           | morL    | 23  | 2      |
| -----AGGTGACAAGAGGGCCTTTCTGG-----                                                                                         | morL    | 21  | 1      |
| -----GGTGACAAGAGGGCCTTTCTG-----                                                                                           | morL    | 21  | 1      |
| -----AAGGTGACAAGAGGGCCTTTC-----                                                                                           | morL    | 22  | 1      |
| -----GTGACAAGAGGGCCTTTCTGGA-----                                                                                          | morL    | 30  | 1      |
| ATGTGGAAGGTGACAAGAGGGCCTTTCTGG                                                                                            | morL    | 22  | 1      |
| -----AAGGTGACAAGAGGGCCTTTCT-----                                                                                          | morL    | 20  | 1      |
| -----GACAAGAGGGCCTTTCTGGA-----                                                                                            | morL    | 18  | 1      |
| -----AGAGGGCCTTTCTGGAGG-----                                                                                              | morL    | 18  | 1      |
| -----CAAGAGGGCCTTTCTGGA-----                                                                                              | morL    | 22  | 1      |
| -----GGTGACAAGAGGGCCTTTCTGG-----                                                                                          | morL    | 22  | 1      |
| -----AGGTGACAAGAGGGCCTTTCTG-----                                                                                          | mirL    | 21  | 168444 |
| -----AGGGCCCCCCTCAATCCTGT-----                                                                                            | mirL    | 22  | 6038   |
| -----AGGGCCCCCCTCAATCCTGTT-----                                                                                           | mirL    | 23  | 2067   |
| -----AGGGCCCCCCTCAATCCTGTTG-----                                                                                          | mirL    | 20  | 957    |
| -----AGGGCCCCCCTCAATCCTG-----                                                                                             | mirL    | 24  | 385    |
| -----AGGGCCCCCCTCAATCCTGTTGT-----                                                                                         | mirL    | 19  | 282    |
| -----AGGGCCCCCCTCAATCCT-----                                                                                              | mirL    | 28  | 273    |
| -----AGGGCCCCCCTCAATCCTGTTGTGCTC-----                                                                                     | mirL    | 20  | 90     |
| -----GGGCCCCCCTCAATCCTGT-----                                                                                             |         |     |        |

```

-----GGCCCCCCTCAATCCTGT----- mirL 19 37
-----GAGGGCCCCCCTCAATCCTGT----- mirL 22 33
-----GCCCCCCCTCAATCCTGT----- mirL 18 6
-----GGCCCCCCTCAATCCTG----- mirL 18 4
-----GGGCCCCCCTCAATCCTG----- mirL 19 4
-----GGGCCCCCCTCAATCCT----- mirL 18 4
-----GGCCCCCCTCAATCCTGTTG----- mirL 21 3
-----TGGAGGGCCCCCCTCAATCCTGT----- mirL 24 2
-----GGAGGGCCCCCCTCAATCCTGT----- mirL 23 2
-----GGAGGGCCCCCCTCAAT----- mirL 18 2
-----GGGCCCCCCTCAATCCTGTTG----- mirL 22 1
-----GAGGGCCCCCCTCAATC----- mirL 18 1
-----GAGGGTTGGGTGGAGGCTCTCC----- mirR 22 9978
-----AGGGTTGGGTGGAGGCTCTCC----- mirR 21 3234
-----GAGGGTTGGGTGGAGGCTCTC----- mirR 21 1786
-----GAGGGTTGGGTGGAGGCTCTCCT----- mirR 23 1688
-----GAGGGTTGGGTGGAGGCTCTCCTG----- mirR 24 1538
-----GAGGGTTGGGTGGAGGCTCT----- mirR 20 1185
-----AGGGTTGGGTGGAGGCTCTCCT----- mirR 22 710
-----AGGGTTGGGTGGAGGCTCTCCTG----- mirR 23 671
-----AGGGTTGGGTGGAGGCTCTC----- mirR 20 579
-----GAGGGTTGGGTGGAGGCTC----- mirR 19 310
-----AGGGTTGGGTGGAGGCTCT----- mirR 19 286
-----GAGGGTTGGGTGGAGGCTCTCCTGA----- mirR 25 217
-----AGGGTTGGGTGGAGGCTCTCCTGA----- mirR 24 118
-----AGGGTTGGGTGGAGGCTCTCCTGAA----- mirR 25 71
-----GTTGGGTGGAGGCTCTCC----- mirR 19 21
-----GGTTGGGTGGAGGCTCTCC----- mirR 20 17
-----GGTTGGGTGGAGGCTCTCCT----- mirR 21 5
-----GTTGGGTGGAGGCTCTCCTG----- mirR 21 5
-----AGAGGGTTGGGTGGAGGCTCTCC----- mirR 23 4
-----GGTTGGGTGGAGGCTCTCCTG----- mirR 22 3
-----GGTTGGGTGGAGGCTCTC----- mirR 19 3
-----AGAGGGTTGGGTGGAGGCTCTCCTG----- mirR 25 2
-----GTTGGGTGGAGGCTCTC----- mirR 18 2
-----GGTTGGGTGGAGGCTCT----- mirR 18 2
-----AGAGGGTTGGGTGGAGGCTCTCCT----- mirR 24 1
-----TCAGAGGGTTGGGTGGAGGCTCTCC----- mirR 25 1
-----GTTGGGTGGAGGCTCTCCT----- mirR 20 1
-----TGAAGGTGTCCGCAGAGCGT----- morR 20 49
-----TGAAGGTGTCCGCAGAGCGTC----- morR 21 20
-----TGAAGGTGTCCGCAGAGCGTCGCATGGTAAGTAG----- morR 34 17
-----TGAAGGTGTCCGCAGAGCGTCGCATGGTAAGTAGT----- morR 35 11
-----TGAAGGTGTCCGCAGAGCGTCGCATGGTAAGTA----- morR 33 6
-----GAAGGTGTCCGCAGAGCGT----- morR 19 5
-----TGAAGGTGTCCGCAGAGCGTCGCATG----- morR 26 4

```

```

-----TGAAGGTGTCCGCAGAGCGTCGCATGGTAAG----- morR 31 4
-----CTGAAGGTGTCCGCAGAG----- morR 18 1
-----CCTGAAGGTGTCCGCAGA----- morR 18 1
-----GAAGGTGTCCGCAGAGCGTCGCATGGTAAGTAGTC morR 35 1
-----GAAGGTGTCCGCAGAGCGTCGCA----- morR 23 1

```

>mmu-mir-30e

| Sequence                                                                                                           | species | len | reads |
|--------------------------------------------------------------------------------------------------------------------|---------|-----|-------|
| TTTATTTTCTGGGCAGTCTTTGCTACTGTA AACATCCTTGACTGGAAGCTGTAAGGTGTTGAGAGGAGCTTTCAGTCGGATGTTTACAGCGGCAGGCTGCCACAGTCGTCCCC | morL    | 22  | 35    |
| -----TTTCTGGGCAGTCTTTGCTACT-----                                                                                   | morL    | 21  | 16    |
| -----TTTCTGGGCAGTCTTTGCTACT-----                                                                                   | morL    | 22  | 5     |
| -----TTCTGGGCAGTCTTTGCTACT-----                                                                                    | morL    | 20  | 4     |
| -----TTCTGGGCAGTCTTTGCTACT-----                                                                                    | morL    | 21  | 1     |
| -----TTCTGGGCAGTCTTTGCT-----                                                                                       | morL    | 18  | 1     |
| TTTATTTTCTGGGCAGTCTTTGCTACT-----                                                                                   | morL    | 27  | 1     |
| -----TTTCTGGGCAGTCTTTGCTACT-----                                                                                   | morL    | 23  | 1     |
| -----GGGCAGTCTTTGCTACTG-----                                                                                       | morL    | 18  | 1     |
| -----TGTA AACATCCTTGACTGGAAGCT-----                                                                                | mirL    | 24  | 87055 |
| -----TGTA AACATCCTTGACTGGAAGC-----                                                                                 | mirL    | 23  | 30036 |
| -----TGTA AACATCCTTGACTGGAAGCTG-----                                                                               | mirL    | 25  | 11002 |
| -----TGTA AACATCCTTGACTGGAAGCTGT-----                                                                              | mirL    | 26  | 9469  |
| -----TGTA AACATCCTTGACTGGAAG-----                                                                                  | mirL    | 22  | 6558  |
| -----GTA AACATCCTTGACTGGAAGCT-----                                                                                 | mirL    | 23  | 6526  |
| -----GTA AACATCCTTGACTGGAAGCTGT-----                                                                               | mirL    | 25  | 3822  |
| -----GTA AACATCCTTGACTGGAAGCTG-----                                                                                | mirL    | 24  | 3236  |
| -----GTA AACATCCTTGACTGGAAGC-----                                                                                  | mirL    | 22  | 2068  |
| -----TGTA AACATCCTTGACTGGA-----                                                                                    | mirL    | 21  | 1715  |
| -----TGTA AACATCCTTGACTGGAAGCTGTA-----                                                                             | mirL    | 27  | 782   |
| -----GTA AACATCCTTGACTGGAAG-----                                                                                   | mirL    | 21  | 583   |
| -----GTA AACATCCTTGACTGGAAGCTGTA-----                                                                              | mirL    | 26  | 398   |
| -----GTA AACATCCTTGACTGGA-----                                                                                     | mirL    | 20  | 279   |
| -----TAAACATCCTTGACTGGAAGCTG-----                                                                                  | mirL    | 23  | 136   |
| -----TAAACATCCTTGACTGGAAGCT-----                                                                                   | mirL    | 22  | 105   |
| -----TAAACATCCTTGACTGGAAGCTGT-----                                                                                 | mirL    | 24  | 101   |
| -----CTGTA AACATCCTTGACTGGAAGCT-----                                                                               | mirL    | 25  | 97    |
| -----AAACATCCTTGACTGGAAGCT-----                                                                                    | mirL    | 21  | 64    |
| -----AAACATCCTTGACTGGAAGCTGT-----                                                                                  | mirL    | 23  | 33    |
| -----AAACATCCTTGACTGGAAGCTG-----                                                                                   | mirL    | 22  | 25    |
| -----TAAACATCCTTGACTGGAAGC-----                                                                                    | mirL    | 21  | 19    |
| -----TAAACATCCTTGACTGGAAG-----                                                                                     | mirL    | 20  | 13    |
| -----ACTGTA AACATCCTTGACTGGAAGCT-----                                                                              | mirL    | 26  | 10    |
| -----CTGTA AACATCCTTGACTGGAAG-----                                                                                 | mirL    | 23  | 5     |
| -----TAAACATCCTTGACTGGAAGCTGTA-----                                                                                | mirL    | 25  | 4     |
| -----CTGTA AACATCCTTGACTGGAAGCTG-----                                                                              | mirL    | 26  | 4     |
| -----AAACATCCTTGACTGGAAGC-----                                                                                     | mirL    | 20  | 4     |
| -----TAAACATCCTTGACTGGA-----                                                                                       | mirL    | 18  | 3     |

```

-----AAACATCCTTGACTGGAAGCTGTA----- mirL 24 3
-----CTGTAAACATCCTTGACTGGAAGC----- mirL 24 2
-----AAACATCCTTGACTGGAAG----- mirL 19 1
-----CTGTAAACATCCTTGACTG----- mirL 19 1
-----AAACATCCTTGACTGGAA----- mirL 18 1
-----ACTGTAAACATCCTTGACTGGAA----- mirL 23 1
-----GTAAGGTGTTGAGAGGAG----- loop 18 152
-----GTAAGGTGTTGAGAGGAGC----- loop 19 76
-----GTAAGGTGTTGAGAGGAGCT----- loop 20 18
-----GTAAGGTGTTGAGAGGAGCTT----- loop 21 4
-----TGTAAGGTGTTGAGAGGA----- loop 18 1
-----CTGTAAAGGTGTTGAGAGGAGC----- loop 21 1
-----AAGGTGTTGAGAGGAGCT----- loop 18 1
-----GCTGTAAAGGTGTTGAGAG----- loop 18 1
-----CTTTCAGTCGGATGTTTACAGC----- mirR 22 13652
-----CTTTCAGTCGGATGTTTACAG----- mirR 21 4235
-----CTTTCAGTCGGATGTTTACAGCG----- mirR 23 2512
-----CTTTCAGTCGGATGTTTACA----- mirR 20 1568
-----CTTTCAGTCGGATGTTTACAGCGG----- mirR 24 285
-----GCTTTCAGTCGGATGTTTACAGC----- mirR 23 178
-----CTTTCAGTCGGATGTTTAC----- mirR 19 175
-----GCTTTCAGTCGGATGTTTACAG----- mirR 22 65
-----CTTTCAGTCGGATGTTTACAGCGG----- mirR 25 60
-----TTTCAGTCGGATGTTTACAGC----- mirR 21 54
-----GCTTTCAGTCGGATGTTTACAGCG----- mirR 24 40
-----TTTCAGTCGGATGTTTACAGCG----- mirR 22 34
-----GCTTTCAGTCGGATGTTTACA----- mirR 21 18
-----TTTCAGTCGGATGTTTACAG----- mirR 20 14
-----GCTTTCAGTCGGATGTTTACAGCG----- mirR 25 13
-----TTCAGTCGGATGTTTACAGC----- mirR 20 12
-----TTTCAGTCGGATGTTTACAGCG----- mirR 23 7
-----TTTCAGTCGGATGTTTACA----- mirR 19 4
-----GCTTTCAGTCGGATGTTTAC----- mirR 20 3
-----TTCAGTCGGATGTTTACAGCG----- mirR 21 2
-----AGCTTTCAGTCGGATGTTTACAG----- mirR 23 2
-----TTCAGTCGGATGTTTACAG----- mirR 19 2
-----TTTCAGTCGGATGTTTAC----- mirR 18 1
-----AGGCTGCCACAGTCGTCCC----- morR 19 883
-----AGGCTGCCACAGTCGTCC----- morR 18 134
-----CAGGCTGCCACAGTCGTCC----- morR 18 5
-----AGGCTGCCACAGTCGTCCCC morR 20 3
-----GCGGCAGGCTGCCACAGT----- morR 18 2
-----AGCGGCAGGCTGCCACAG----- morR 18 2
-----GGCAGGCTGCCACAGTCG----- morR 18 1
-----GGCAGGCTGCCACAGTCGTCCCC morR 23 1
-----CGGCAGGCTGCCACAGTCG----- morR 19 1

```

```
-----CGGCAGGCTGCCACAGTCGTC--- morR 21 1
-----CGGCAGGCTGCCACAGTC----- morR 18 1

>mmu-let-7b
CCTCCTCCAGAACACGGACACCGCAGGGTGAGGTAGTAGGTTGTGTGGTTTCAGGGCAGTGATGTTGCCCTCCGAAGATAACTATACAACCTACTGCCTTCCCTGAGGCGCCAGGGACACAGCTACATGGAGGCC sp
-----AACACGGACACCGCAGGG----- mo
-----GAACACGGACACCGCAGGG----- mo
-----AGAACACGGACACCGCAGGG----- mo
-----CAGAACACGGACACCGCAGGG----- mo
-----CCTCCAGAACACGGACACCGCAGGG----- mo
-----ACACGGACACCGCAGGGT----- mo
CCTCCTCCAGAACACGGACACCGCAGGG----- mo
-----AACACGGACACCGCAGGGT----- mo
-----AGAACACGGACACCGCAGG----- mo
-----CAGAACACGGACACCGCA----- mo
-----AGAACACGGACACCGCAG----- mo
-----GAACACGGACACCGCAGG----- mo
-----CCAGAACACGGACACCGCAGGGT----- mo
-----ACGGACACCGCAGGGTGA----- mo
-CTCCTCCAGAACACGGACACCGCAG----- mo
-----TGAGGTAGTAGGTTGTGTGGTT----- mi
-----TGAGGTAGTAGGTTGTGTGGTT----- mi
-----TGAGGTAGTAGGTTGTGTGG----- mi
-----TGAGGTAGTAGGTTGTGTGGTTTC----- mi
-----TGAGGTAGTAGGTTGTGTGGT----- mi
-----TGAGGTAGTAGGTTGTGTGGTTTCA----- mi
-----GAGGTAGTAGGTTGTGTGGTT----- mi
-----TGAGGTAGTAGGTTGTGTG----- mi
-----GAGGTAGTAGGTTGTGTGGTTT----- mi
-----GAGGTAGTAGGTTGTGTGG----- mi
-----GAGGTAGTAGGTTGTGTGGTTTC----- mi
-----GAGGTAGTAGGTTGTGTGGT----- mi
-----GAGGTAGTAGGTTGTGTGGTTTCA----- mi
-----GAGGTAGTAGGTTGTGTG----- mi
-----GGTAGTAGGTTGTGTGGTT----- mi
-----AGGTAGTAGGTTGTGTGGTT----- mi
-----GTGAGGTAGTAGGTTGTGTGGTT----- mi
-----GGTGAGGTAGTAGGTTGTGTGGTT----- mi
-----GGGTGAGGTAGTAGGTTGTGTGGTT----- mi
-----AGGTAGTAGGTTGTGTGGTTT----- mi
-----GTGAGGTAGTAGGTTGTGTGGTTT----- mi
-----AGGTAGTAGGTTGTGTGG----- mi
-----GTGAGGTAGTAGGTTGTGTGG----- mi
-----GTGAGGTAGTAGGTTGTGTGGTTTC----- mi
-----GGTGAGGTAGTAGGTTGTGTGGTTTC----- mi
-----GGTAGTAGGTTGTGTGGTT----- mi
```

```
-----GTGAGGTAGTAGGTTGTGTGGT----- mi
-----GGTAGTAGGTTGTGTGGT----- mi
-----AGGTAGTAGGTTGTGTGGTTTC----- mi
-----GGTAGTAGGTTGTGTGGTTTC----- mi
-----GGGTGAGGTAGTAGGTTGTGTGG----- mi
-----GTGAGGTAGTAGGTTGTGTG----- mi
-----GGTGAGGTAGTAGGTTGTGTGGT----- mi
-----TCAGGGCAGTGATGTTGCCCTCCGAAGATAAC----- lo
-----TCAGGGCAGTGATGTTGCCCTCCGAAGAT----- lo
-----TCAGGGCAGTGATGTTGCCCTCCGAAGA----- lo
-----TCAGGGCAGTGATGTTGCCCTCCGAAGATA----- lo
-----TCAGGGCAGTGATGTTGCCCTCCGAAGATAA----- lo
-----CAGGGCAGTGATGTTGCCCTCCGAAGATAA----- lo
-----CAGGGCAGTGATGTTGCCCTCCGAAGA----- lo
-----CAGGGCAGTGATGTTGCCCTCCGAAGATAAC----- lo
-----CTATACAACCTACTGCCTTCCC----- mi
-----CTATACAACCTACTGCCTTCC----- mi
-----CTATACAACCTACTGCCTTC----- mi
-----CTATACAACCTACTGCCTTCCCT----- mi
-----CTATACAACCTACTGCCTTCCCTG----- mi
-----CTATACAACCTACTGCCTT----- mi
-----CTATACAACCTACTGCCTTCCCTGA----- mi
-----TATACAACCTACTGCCTTCCC----- mi
-----TATACAACCTACTGCCTTCC----- mi
-----TACAACCTACTGCCTTCC----- mi
-----ACTATACAACCTACTGCCTTCCC----- mi
-----TATACAACCTACTGCCTTC----- mi
-----ATACAACCTACTGCCTTCCCT----- mi
-----TACAACCTACTGCCTTCCCTGA----- mi
-----ATACAACCTACTGCCTTCC----- mi
-----TATACAACCTACTGCCTT----- mi
-----TAACTATACAACCTACTGCCTTC----- mi
-----ACTATACAACCTACTGCCTTC----- mi
-----ACTATACAACCTACTGCCTTCC----- mi
-----TATACAACCTACTGCCTTCCCT----- mi
-----TACAACCTACTGCCTTCCC----- mi
-----CTGAGGCGCCAGGGACA----- mo
-----CTGAGGCGCCAGGGACACAGCTACATGGAGGCC----- mo
-----AGGCGCCAGGGACACAGC----- mo
-----CTGAGGCGCCAGGGACAC----- mo
-----TGAGGCGCCAGGGACACA----- mo
-----CTGAGGCGCCAGGGACACAGCTACATGG----- mo
-----CTGAGGCGCCAGGGACACAGCTACATG----- mo
-----CTGAGGCGCCAGGGACACA----- mo
-----GGCGCCAGGGACACAGC----- mo
```

```

>mmu-mir-100
CACAAAGAGAAGACACTGAAGCCTGTTGCCACAAACCCGTAGATCCGAACCTGTGCTGATTCTGCACACAAGCTTGTGTCTATAGGTATGTGTCTGTTAGGCGATCCCACA species len reads
CACAAAGAGAAGACACTGAAGCCTGTTGCCA----- morL 30 4
-----AAGCCTGTTGCCACAAAC----- morL 18 3
-----ACACTGAAGCCTGTTGCCACAA----- morL 22 2
-----CTGAAGCCTGTTGCCACA----- morL 18 2
-----ACTGAAGCCTGTTGCCACA----- morL 19 1
-----GAAGCCTGTGCCACAAA----- morL 18 1
-----CACTGAAGCCTGTTGCCA----- morL 18 1
-----GAAGCCTGTTGCCACAAAC----- morL 19 1
-----TGAAGCCTGTTGCCACAAAC----- morL 20 1
-----ACACTGAAGCCTGTTGCCACA----- morL 21 1
-----AACCCGTAGATCCGAACCTTGTG----- mirL 22 101958
-----AACCCGTAGATCCGAACCTTGTGC----- mirL 23 46315
-----AACCCGTAGATCCGAACCTTGT----- mirL 21 24457
-----AACCCGTAGATCCGAACCTTG----- mirL 20 1725
-----ACCCGTAGATCCGAACCTTGTG----- mirL 21 1153
-----AACCCGTAGATCCGAACCTTGTGCT----- mirL 24 1107
-----ACCCGTAGATCCGAACCTTGTGC----- mirL 22 1035
-----AACCCGTAGATCCGAACCT----- mirL 18 958
-----AACCCGTAGATCCGAACCTTGTGCTG----- mirL 25 266
-----ACCCGTAGATCCGAACCTTGT----- mirL 20 149
-----ACCCGTAGATCCGAACCTTGTGCT----- mirL 23 60
-----AAACCCGTAGATCCGAACCTTGT----- mirL 22 40
-----ACCCGTAGATCCGAACCTTG----- mirL 19 37
-----AAACCCGTAGATCCGAACCTTGTG----- mirL 23 23
-----CCCGTAGATCCGAACCTTGTG----- mirL 20 22
-----CCGTAGATCCGAACCTTGTG----- mirL 19 9
-----ACCCGTAGATCCGAACCTTGTGCTG----- mirL 24 8
-----CCCGTAGATCCGAACCTTGT----- mirL 19 6
-----CCCGTAGATCCGAACCTTGTGC----- mirL 21 6
-----AAACCCGTAGATCCGAACCTTGTGC----- mirL 24 5
-----CAAACCCGTAGATCCGAACCTTGTG----- mirL 24 5
-----CCCGTAGATCCGAACCTTG----- mirL 18 4
-----AAACCCGTAGATCCGAACCT----- mirL 19 4
-----CAAACCCGTAGATCCGAAC----- mirL 19 2
-----CCGTAGATCCGAACCTTGTGC----- mirL 20 2
-----ACCCGTAGATCCGAACCTT----- mirL 18 2
-----AAACCCGTAGATCCGAACCTTG----- mirL 21 1
-----CAAACCCGTAGATCCGA----- mirL 18 1
-----AAACCCGTAGATCCGAACCTT----- mirL 20 1
-----CAAGCTTGTGTCTATAGGTATG----- mirR 22 727
-----CAAGCTTGTGTCTATAGGTAT----- mirR 21 512
-----ACAAGCTTGTGTCTATAGGTAT----- mirR 22 257
-----CAAGCTTGTGTCTATAGGTATGT----- mirR 23 105
-----ACAAGCTTGTGTCTATAGGTATG----- mirR 23 15

```

```
-----CAAGCTTGTGTCTATAGGTA----- mirR 20 12
-----AGCTTGTGTCTATAGGTAT----- mirR 19 8
-----CAAGCTTGTGTCTATAGGT----- mirR 19 7
-----GCTTGTGTCTATAGGTAT----- mirR 18 4
-----AAGCTTGTGTCTATAGGTATGT----- mirR 22 3
-----AGCTTGTGTCTATAGGTATG----- mirR 20 3
-----CAAGCTTGTGTCTATAGGTATGTG----- mirR 24 3
-----ACAAGCTTGTGTCTATAGGT----- mirR 20 2
-----ACAAGCTTGTGTCTATAG----- mirR 18 2
-----AAGCTTGTGTCTATAGGTATG----- mirR 21 1
-----ACAAGCTTGTGTCTATAGGTA----- mirR 21 1
-----CTGTTAGGCGATCCACA morR 18 2
-----GTGCTGTTAGGCGATCC--- morR 18 1
```

>mmu-let-7d

```
ACCAGCAAGAATAAAATGGGTTCCCTAGGAAGAGGTAGTAGGTTGCATAGTTTTAGGGCAGAGATTTGCCCAAGGAGTTAACTATACGACCTGCTGCCTTTCTTAGGGCCTTATTATACCAGCATAACGTTTC specie
-----ATAAAATGGGTTCCCTAGGA----- morL 1
--CAGCAAGAATAAAATGGGTTCCCTAGGA----- morL 2
ACCAGCAAGAATAAAATGGGTTCCCTAGGA----- morL 2
-----GAATAAAATGGGTTCCCTAGGA----- morL 2
----GCAAGAATAAAATGGGTTCCCTAGGA----- morL 2
-----TAAAAATGGGTTCCCTAGGA----- morL 1
--CCAGCAAGAATAAAATGGGTTCCCTAGGA----- morL 2
----GCAAGAATAAAATGGGTTCCCTAGGAAGA----- morL 2
-----AAAATGGGTTCCCTAGGAA----- morL 1
----CAAGAATAAAATGGGTTCCCTAGGAA----- morL 2
-----AATAAAATGGGTTCCCTAGG----- morL 1
-----ATAAAATGGGTTCCCTAGGAA----- morL 2
-----AGAGGTAGTAGGTTGCATAGTT----- mirL 2
-----AGAGGTAGTAGGTTGCATAGT----- mirL 2
-----AGAGGTAGTAGGTTGCATAGTTT----- mirL 2
-----AGAGGTAGTAGGTTGCATAG----- mirL 2
-----AGAGGTAGTAGGTTGCATAGTTTT----- mirL 2
-----AGAGGTAGTAGGTTGCATA----- mirL 1
-----AGAGGTAGTAGGTTGCAT----- mirL 1
-----GAGGTAGTAGGTTGCATAGTT----- mirL 2
-----AAGAGGTAGTAGGTTGCATAGT----- mirL 2
-----AAGAGGTAGTAGGTTGCATAGTT----- mirL 2
-----GAGGTAGTAGGTTGCATAG----- mirL 1
-----GAGGTAGTAGGTTGCATAGT----- mirL 2
-----AAGAGGTAGTAGGTTGCATAG----- mirL 2
-----GAGGTAGTAGGTTGCATAGTTT----- mirL 2
-----AAGAGGTAGTAGGTTGCATA----- mirL 2
-----GAGGTAGTAGGTTGCATA----- mirL 1
-----AAGAGGTAGTAGGTTGCATAGTTT----- mirL 2
-----AAGAGGTAGTAGGTTGCATAGTTT----- mirL 2
```



```
-----GAGGTAGTAGGTTGCATAGTTTT----- mirL 2
-----AAGAGGTAGTAGGTTGCAT----- mirL 1
-----GGTAGTAGGTTGCATAGTT----- mirL 1
-----AGGTAGTAGGTTGCATAGTT----- mirL 2
-----AGGTAGTAGGTTGCATAGTTTT----- mirL 2
-----GGTAGTAGGTTGCATAGT----- mirL 1
-----AGGTAGTAGGTTGCATAG----- mirL 1
-----GAGGTAGTAGGTTGCATAGTTTTA----- mirL 2
-----GGTAGTAGGTTGCATAGTT----- mirL 2
-----GAAGAGGTAGTAGGTTGCATAGT----- mirL 2
-----GGTAGTAGGTTGCATAGTTTT----- mirL 2
-----AGGTAGTAGGTTGCATAGTT----- mirL 2
-----GGAAGAGGTAGTAGGTTG----- mirL 1
-----TTAGGGCAGAGATTTGCCCCACAAGGAGTTAAC----- loop 3
-----TTAGGGCAGAGATTTGCCCCACAAGGAGTTA----- loop 3
-----TTTAGGGCAGAGATTTGCCCCACAAGGAGTTA----- loop 3
-----TTAGGGCAGAGATTTGCCCCACAAGGAGTT----- loop 3
-----CTATACGACCTGCTGCCTTTCT----- mirR 2
-----CTATACGACCTGCTGCCTTTC----- mirR 2
-----CTATACGACCTGCTGCCTTT----- mirR 2
-----CTATACGACCTGCTGCCTTTCTT----- mirR 2
-----TATACGACCTGCTGCCTTTCT----- mirR 2
-----CTATACGACCTGCTGCCTT----- mirR 1
-----CTATACGACCTGCTGCCTTTCTTA----- mirR 2
-----TATACGACCTGCTGCCTTTC----- mirR 2
-----CTATACGACCTGCTGCCTTTCTTAG----- mirR 2
-----TATACGACCTGCTGCCTTTCTT----- mirR 2
-----ATACGACCTGCTGCCTTTCT----- mirR 2
-----TATACGACCTGCTGCCTTTCTTA----- mirR 2
-----TATACGACCTGCTGCCTTT----- mirR 1
-----TATACGACCTGCTGCCTTTCTTAG----- mirR 2
-----ATACGACCTGCTGCCTTTC----- mirR 1
-----TATACGACCTGCTGCCTT----- mirR 1
-----ACTATACGACCTGCTGCCTTTCT----- mirR 2
-----ATACGACCTGCTGCCTTT----- mirR 1
-----TACGACCTGCTGCCTTTCT----- mirR 1
-----ATACGACCTGCTGCCTTTCTTA----- mirR 2
-----ATACGACCTGCTGCCTTTCTT----- mirR 2
-----TACGACCTGCTGCCTTTC----- mirR 1
-----ATACGACCTGCTGCCTTTCTTAG----- mirR 2
-----AACTATACGACCTGCTGCCTTT----- mirR 2
-----ACTATACGACCTGCTGCCTTTC----- mirR 2
-----AACTATACGACCTGCTGCCTTTCT----- mirR 2
-----ACTATACGACCTGCTGCCT----- mirR 1
-----TAACTATACGACCTGCTGCCTTT----- mirR 2
-----ACTATACGACCTGCTGCCTTTCT----- mirR 2
```

```

-----TTAGGGCCTTATTATACCAGCATAACGTTTC morR 3
-----TAGGGCCTTATTATACCA----- morR 1
-----TTAGGGCCTTATTATACCA----- morR 1
-----GGGCCTTATTATACCAGC----- morR 1

```

>mmu-mir-328

| Species | len | read  |
|---------|-----|-------|
| morL    | 19  | 103   |
| morL    | 20  | 92    |
| morL    | 18  | 41    |
| morL    | 18  | 5     |
| morL    | 26  | 4     |
| morL    | 18  | 3     |
| morL    | 23  | 2     |
| morL    | 23  | 2     |
| morL    | 18  | 2     |
| morL    | 20  | 2     |
| morL    | 21  | 1     |
| morL    | 18  | 1     |
| morL    | 21  | 1     |
| morL    | 21  | 1     |
| morL    | 19  | 1     |
| morL    | 19  | 1     |
| morL    | 19  | 1     |
| mirL    | 22  | 125   |
| mirL    | 23  | 98    |
| mirL    | 24  | 68    |
| mirL    | 18  | 40    |
| mirL    | 25  | 27    |
| mirL    | 21  | 27    |
| mirL    | 26  | 15    |
| mirL    | 18  | 4     |
| mirL    | 19  | 4     |
| mirL    | 23  | 2     |
| mirL    | 26  | 1     |
| loop    | 18  | 226   |
| loop    | 19  | 33    |
| loop    | 18  | 2     |
| loop    | 21  | 2     |
| loop    | 18  | 1     |
| mirR    | 22  | 97412 |
| mirR    | 23  | 30423 |
| mirR    | 24  | 27237 |
| mirR    | 21  | 6841  |
| mirR    | 19  | 4514  |
| mirR    | 25  | 3614  |

```

-----CTGGCCCTCTGCCCCTT----- mirR 18 1423
-----CCTGGCCCTCTGCCCCTCCGT----- mirR 23 506
-----CCTGGCCCTCTGCCCCTCCGTC----- mirR 24 205
-----CCTGGCCCTCTGCCCCTCCGTCC----- mirR 25 135
-----TGGCCCTCTGCCCCTCCGT----- mirR 21 105
-----TGGCCCTCTGCCCCTCCGTCC----- mirR 23 86
-----CCTGGCCCTCTGCCCCTTC----- mirR 20 37
-----CCTGGCCCTCTGCCCCTCCG----- mirR 22 29
-----GGCCCTCTGCCCCTCCGT----- mirR 20 27
-----TGGCCCTCTGCCCCTCCG----- mirR 20 26
-----CCTGGCCCTCTGCCCCTTC----- mirR 21 22
-----TGGCCCTCTGCCCCTCCGTCC----- mirR 22 18
-----CCTGGCCCTCTGCCCCTT----- mirR 19 17
-----GGCCCTCTGCCCCTCCG----- mirR 19 12
-----GCCCTCTGCCCCTCCGT----- mirR 19 12
-----TGGCCCTCTGCCCCTTC----- mirR 18 5
-----CCCTGGCCCTCTGCCCCTCCG----- mirR 23 4
-----TGGCCCTCTGCCCCTTC----- mirR 19 3
-----CCCCTGGCCCTCTGCCCCTCCGTCC----- mirR 27 3
-----GGCCCTCTGCCCCTCCGTCC----- mirR 21 2
-----GGCCCTCTGCCCCTCCGTCC----- mirR 22 2
-----TGGCCCTCTGCCCCTCCGTCCC----- mirR 24 1
-----GCCCTCTGCCCCTCCG----- mirR 18 1
-----CCCTGGCCCTCTGCCC----- mirR 18 1
-----TCCCCTGTCCCCAAGTACTGGACCCAGCC----- morR 31 5
-----CCCCTGTCCCCAAGTACTGGACCCAGCC----- morR 30 5
-----TCCCCTGTCCCCAAGTACTGGACCCAGCCCGAC morR 35 4
-----CCCCTGTCCCCAAGTACTG----- morR 21 2
-----TCCCCTGTCCCCAAGTACTGGA----- morR 24 1
-----TCCCCTGTCCCCAAGTACTGGACCCAGCC----- morR 32 1
-----TCCCCTGTCCCCAAGTACTG----- morR 20 1
-----CTGTCCCCAAGTACTG----- morR 18 1

```

>mmu-let-7c-1

```

TGGAAGCTGTGTGCATCCGGGTTGAGGTAGTAGGTTGTATGGTTTAGAGTTACACCTGGGAGTTAACTGTACAACCTTCTAGCTTTCCTTGGAGCACACTTGAGC species len reads
-----CTGTGTGCATCCGGGTTG----- morL 18 3
-----GCTGTGTGCATCCGGGTT----- morL 18 2
TGGAAGCTGTGTGCATCCGGG----- morL 21 1
-----TGAGGTAGTAGGTTGTATGGTT----- mirL 22 115068
-----TGAGGTAGTAGGTTGTATGGTTT----- mirL 23 18763
-----TGAGGTAGTAGGTTGTATGGT----- mirL 21 7817
-----GAGGTAGTAGGTTGTATGGTT----- mirL 21 5192
-----TGAGGTAGTAGGTTGTATGG----- mirL 20 3891
-----TGAGGTAGTAGGTTGTATGGTTTA----- mirL 24 3884
-----GAGGTAGTAGGTTGTATGGTTT----- mirL 22 1153
-----TGAGGTAGTAGGTTGTATGGTTTAG----- mirL 25 632

```

```

-----TGAGGTAGTAGGTTGTATG----- mirL 19 618
-----GAGGTAGTAGGTTGTATGGTTTA----- mirL 23 292
-----GAGGTAGTAGGTTGTATGGT----- mirL 20 268
-----GAGGTAGTAGGTTGTATGG----- mirL 19 263
-----TTGAGGTAGTAGGTTGTATGGTT----- mirL 23 150
-----GAGGTAGTAGGTTGTATGGTTAG----- mirL 24 47
-----TTGAGGTAGTAGGTTGTATGGT----- mirL 22 43
-----GTTGAGGTAGTAGGTTGTATGGTT----- mirL 24 37
-----GAGGTAGTAGGTTGTATG----- mirL 18 34
-----GTTGAGGTAGTAGGTTGTATGGT----- mirL 23 28
-----AGGTAGTAGGTTGTATGGTT----- mirL 20 23
-----TTGAGGTAGTAGGTTGTATGGTT----- mirL 24 14
-----AGGTAGTAGGTTGTATGGTTT----- mirL 21 12
-----TTGAGGTAGTAGGTTGTATGG----- mirL 21 11
-----GGTAGTAGGTTGTATGGTT----- mirL 19 10
-----GTTGAGGTAGTAGGTTGTATGGTT----- mirL 25 7
-----GGTTGAGGTAGTAGGTTGTATGGTT----- mirL 25 4
-----GGTTGAGGTAGTAGGTTGTATGGT----- mirL 24 4
-----TTGAGGTAGTAGGTTGTATGGTTTA----- mirL 25 4
-----AGGTAGTAGGTTGTATGGT----- mirL 19 2
-----GGTAGTAGGTTGTATGGTTTA----- mirL 21 2
-----GGTAGTAGGTTGTATGGTTT----- mirL 20 2
-----TTGAGGTAGTAGGTTGTATG----- mirL 20 2
-----TTGAGGTAGTAGGTTGTATGGTTTAGA----- mirL 27 1
-----GGTTGAGGTAGTAGGTTGTATG----- mirL 22 1
-----GTTGAGGTAGTAGGTTGTATGG----- mirL 22 1
-----TAGAGTTACACCCCTGGGAGTTA----- loop 22 567
-----TAGAGTTACACCCCTGGGAGTT----- loop 21 45
-----TAGAGTTACACCCCTGGGAGTTAA----- loop 23 20
-----AGAGTTACACCCCTGGGAGTTA----- loop 21 20
-----TAGAGTTACACCCCTGGGAGT----- loop 20 10
-----GAGTTACACCCCTGGGAGTTA----- loop 20 8
-----GAGTTACACCCCTGGGAGTT----- loop 19 3
-----AGTTACACCCCTGGGAGTTA----- loop 19 3
-----AGAGTTACACCCCTGGGAGTTAA----- loop 22 2
-----AGTTACACCCCTGGGAGTT----- loop 18 2
-----TAGAGTTACACCCCTGGGAGTTAACTG----- loop 26 1
-----GAGTTACACCCCTGGGAGT----- loop 18 1
-----CTGTACAACCTTCTAGCTTTCC----- mirR 22 2551
-----CTGTACAACCTTCTAGCTTTCC----- mirR 21 448
-----CTGTACAACCTTCTAGCTTTCCCT----- mirR 23 122
-----CTGTACAACCTTCTAGCTTT----- mirR 20 87
-----ACTGTACAACCTTCTAGCTTTCC----- mirR 22 37
-----TGTACAACCTTCTAGCTTTCCCT----- mirR 23 35
-----TGTACAACCTTCTAGCTTTCCCT----- mirR 22 18
-----CTGTACAACCTTCTAGCTTTCCCT----- mirR 24 17

```

```

-----TGTACAACCTTCTAGCTTTCC----- mirR 21 16
-----TGTACAACCTTCTAGCTTTC----- mirR 20 16
-----GTACAACCTTCTAGCTTTCC----- mirR 20 15
-----TACAACCTTCTAGCTTTC----- mirR 18 7
-----CTGTACAACCTTCTAGCT----- mirR 18 5
-----TGTACAACCTTCTAGCTTT----- mirR 19 2
-----TGTACAACCTTCTAGCTTTCCTTG----- mirR 24 1
-----GTACAACCTTCTAGCTTT----- mirR 18 1
-----CTGTACAACCTTCTAGCTT----- mirR 19 1
-----AACTGTACAACCTTCTAGCTT----- mirR 21 1
-----CTTGGAGCACACTTGAGC morR 18 3
-----CCTTGGAGCACACTTGAG- morR 18 1

>mmu-mir-434
AACATCGCTCGACTCTGGGTTTGAACCAAAGCTCGACTCATGGTTTGAACCATTACTTAATTCGTGGTTTGAACCATCACTCGACTCCTGGTTCGAACCATCATCACTTGAT species len reads
-----GCTCGACTCTGGGTTTGAACCA----- morL 22 83
-----GCTCGACTCTGGGTTTGAACC----- morL 21 20
-----CTCGACTCTGGGTTTGAACCAA----- morL 22 9
-----CGACTCTGGGTTTGAACCAA----- morL 20 6
-----GCTCGACTCTGGGTTTGAACCAA----- morL 23 6
-----CTCGACTCTGGGTTTGAACC----- morL 20 5
-----CTCGACTCTGGGTTTGAACCA----- morL 21 4
-----GACTCTGGGTTTGAACCAA----- morL 20 4
-----ACTCTGGGTTTGAACCAAAGC----- morL 21 2
-----CGACTCTGGGTTTGAACC----- morL 18 2
-----ACTCTGGGTTTGAACCAA----- morL 19 2
-----CGCTCGACTCTGGGTTTGAACCA----- morL 23 1
-----TCGACTCTGGGTTTGAACCA----- morL 20 1
-----CTGGGTTTGAACCAAAGC----- morL 18 1
AACATCGCTCGACTCTGGGTTTGAACCAA----- morL 30 1
-----ACTCTGGGTTTGAACCAAAG----- morL 20 1
-----GCTCGACTCATGGTTTGAACCA----- mirL 22 41165
-----AGCTCGACTCATGGTTTGAACCA----- mirL 23 11734
-----GCTCGACTCATGGTTTGAACC----- mirL 21 11472
-----AGCTCGACTCATGGTTTGAACC----- mirL 22 6780
-----GCTCGACTCATGGTTTGAACC----- mirL 20 2174
-----AGCTCGACTCATGGTTTGAAC----- mirL 21 1395
-----AGCTCGACTCATGGTTTGA----- mirL 19 621
-----GCTCGACTCATGGTTTGAACCAT----- mirL 23 571
-----AGCTCGACTCATGGTTTGAAC----- mirL 20 398
-----GCTCGACTCATGGTTTGAAC----- mirL 19 388
-----GCTCGACTCATGGTTTGAACCATT----- mirL 24 205
-----AGCTCGACTCATGGTTTGAACCAT----- mirL 24 200
-----CGACTCATGGTTTGAACC----- mirL 18 147
-----GCTCGACTCATGGTTTGA----- mirL 18 126
-----AGCTCGACTCATGGTTTG----- mirL 18 108

```

```

-----CTCGACTCATGGTTTGAACCA----- mirL 21 37
-----CTCGACTCATGGTTTGAACC----- mirL 20 29
-----CGACTCATGGTTTGAACCATT----- mirL 21 24
-----TCGACTCATGGTTTGAACC----- mirL 19 11
-----AAGCTCGACTCATGGTTTGAACC----- mirL 23 9
-----TCGACTCATGGTTTGAACCA----- mirL 20 8
-----TCGACTCATGGTTTGAAC----- mirL 18 4
-----CGACTCATGGTTTGAACCA----- mirL 19 4
-----AAAGCTCGACTCATGGTT----- mirL 18 3
-----CTCGACTCATGGTTTGAAC----- mirL 19 3
-----AAGCTCGACTCATGGTTT----- mirL 19 1
-----AAGCTCGACTCATGGTTTGA----- mirL 21 1
-----ATTACTTAATTCGTGGTT----- loop 18 4
-----TTTGAACCATCACTCGACTCCT----- mirR 22 40507
-----TTTGAACCATCACTCGACTCC----- mirR 21 24237
-----TTGAACCATCACTCGACTCCT----- mirR 21 3904
-----TTGAACCATCACTCGACTCC----- mirR 20 3885
-----TTTGAACCATCACTCGACTC----- mirR 20 2551
-----TTTGAACCATCACTCGACTCCTG----- mirR 23 1952
-----TTTGAACCATCACTCGACT----- mirR 19 1007
-----GTTTGAACCATCACTCGACTCC----- mirR 22 732
-----GTTTGAACCATCACTCGACTC----- mirR 21 560
-----TTGAACCATCACTCGACTC----- mirR 19 334
-----TTTGAACCATCACTCGACTCCTGG----- mirR 24 323
-----GTTTGAACCATCACTCGACTCCT----- mirR 23 265
-----TTGAACCATCACTCGACTCCTG----- mirR 22 257
-----TTTGAACCATCACTCGACTC----- mirR 18 187
-----GTTTGAACCATCACTCGACT----- mirR 20 124
-----TTGAACCATCACTCGACT----- mirR 18 92
-----TGAACCATCACTCGACTCC----- mirR 19 80
-----GAACCATCACTCGACTCC----- mirR 18 55
-----TGAACCATCACTCGACTCCT----- mirR 20 53
-----GAACCATCACTCGACTCCT----- mirR 19 42
-----TTGAACCATCACTCGACTCCTGG----- mirR 23 28
-----TGAACCATCACTCGACTC----- mirR 18 19
-----GTTTGAACCATCACTCGA----- mirR 18 11
-----GTTTGAACCATCACTCGAC----- mirR 19 11
-----GTTTGAACCATCACTCGACTCCTG----- mirR 24 9
-----GGTTTGAACCATCACTCGACTCC----- mirR 23 6
-----TGTTTGAACCATCACTCGACTCC----- mirR 24 6
-----TGGTTTGAACCATCACTC----- mirR 18 3
-----TTGAACCATCACTCGACTCCTGGT----- mirR 24 2
-----GGTTTGAACCATCACTCGACTCCT----- mirR 24 1
-----GAACCATCACTCGACTCCTG----- mirR 20 1
-----TGAACCATCACTCGACTCCTGG----- mirR 22 1
-----TCGAACCATCACTCTG----- morR 18 1

```

```

-----TTCGAACCATCATCACTT--- morR 18 1
-----TCGAACCATCATCACTTGAT morR 20 1

>mmu-mir-409
CTCCGTGGTACTCGGAGAGAGGTTACCCGAGCAACTTTGCATCTGGAGGACGAATGTTGCTCGGTGAACCCCTTTTCGGTATCAAATCCCTCCAG species len reads
-TCCGTGGTACTCGGAGAG----- morL 18 4
CTCCGTGGTACTCGGAGAG----- morL 19 3
-TCCGTGGTACTCGGAGAGAG----- morL 21 1
--CCGTGGTACTCGGAGAGA----- morL 18 1
-TCCGTGGTACTCGGAGAGAG----- morL 20 1
-----AGGTTACCCGAGCAACTTTGCAT----- mirL 23 3743
-----AGGTTACCCGAGCAACTTTGCATC----- mirL 24 2488
-----AGGTTACCCGAGCAACTTTGCA----- mirL 22 2265
-----AGGTTACCCGAGCAACTTTGCATCT----- mirL 25 1894
-----AGGTTACCCGAGCAACTTTG----- mirL 20 979
-----AGGTTACCCGAGCAACTTTGC----- mirL 21 846
-----AGGTTACCCGAGCAACTT----- mirL 18 91
-----GGTTACCCGAGCAACTTTGCA----- mirL 21 66
-----GGTTACCCGAGCAACTTTG----- mirL 19 60
-----GGTTACCCGAGCAACTTTGCAT----- mirL 22 54
-----GTTACCCGAGCAACTTTGCA----- mirL 20 40
-----GTTACCCGAGCAACTTTG----- mirL 18 38
-----TTACCCGAGCAACTTTGCA----- mirL 19 23
-----GTTACCCGAGCAACTTTGC----- mirL 19 16
-----GGTTACCCGAGCAACTTTGC----- mirL 20 10
-----GAGAGGTTACCCGAGCAACT----- mirL 20 9
-----TTACCCGAGCAACTTTGCAT----- mirL 20 6
-----AGAGGTTACCCGAGCAAC----- mirL 18 4
-----GAGGTTACCCGAGCAACTTTGCATC----- mirL 25 3
-----GGTTACCCGAGCAACTTTGCATCT----- mirL 24 3
-----GAGGTTACCCGAGCAACTTTGCAT----- mirL 24 2
-----GGTTACCCGAGCAACTTT----- mirL 18 2
-----GAGGTTACCCGAGCAACTTTGCA----- mirL 23 2
-----GAGGTTACCCGAGCAACT----- mirL 18 2
-----GTTACCCGAGCAACTTTGCATC----- mirL 22 1
-----GTTACCCGAGCAACTTTGCAT----- mirL 21 1
-----GAGAGGTTACCCGAGCAACTTTG----- mirL 23 1
-----AGAGGTTACCCGAGCAACTTT----- mirL 21 1
-----GAGAGGTTACCCGAGCAA----- mirL 18 1
-----GAATGTTGCTCGGTGAACCCCT----- mirR 22 45822
-----CGAATGTTGCTCGGTGAACCCCT----- mirR 23 31436
-----GAATGTTGCTCGGTGAACCCCT----- mirR 23 22679
-----GAATGTTGCTCGGTGAACCCCTTT----- mirR 24 9166
-----AATGTTGCTCGGTGAACCCCT----- mirR 21 8558
-----CGAATGTTGCTCGGTGAACCCCT----- mirR 24 6273
-----GAATGTTGCTCGGTGAACCCCTTT----- mirR 25 3347

```

```

-----AATGTTGCTCGGTGAACCCCTT----- mirR 22 3333
-----CGAATGTTGCTCGGTGAACCCCTTT----- mirR 25 3161
-----AATGTTGCTCGGTGAACCCC----- mirR 20 1976
-----CGAATGTTGCTCGGTGAACCCC----- mirR 22 1697
-----CGAATGTTGCTCGGTGAACCCCTTT----- mirR 26 1637
-----GAATGTTGCTCGGTGAACCCC----- mirR 21 1557
-----AATGTTGCTCGGTGAACCCCTTT----- mirR 23 1381
-----GAATGTTGCTCGGTGAACCCCTTTTC----- mirR 26 1134
-----CGAATGTTGCTCGGTGAACCCCTTTTC----- mirR 27 713
-----GAATGTTGCTCGGTGAACCCC----- mirR 20 471
-----CGAATGTTGCTCGGTGAACCCC----- mirR 21 434
-----AATGTTGCTCGGTGAACCCCTTT----- mirR 24 393
-----AATGTTGCTCGGTGAACCCC----- mirR 19 165
-----ATGTTGCTCGGTGAACCCCT----- mirR 20 145
-----ATGTTGCTCGGTGAACCCC----- mirR 19 127
-----TGTTGCTCGGTGAACCCCTTT----- mirR 21 110
-----AATGTTGCTCGGTGAACCCCTTTTC----- mirR 25 100
-----ATGTTGCTCGGTGAACCCCTTT----- mirR 21 98
-----TGTTGCTCGGTGAACCCCTTT----- mirR 20 90
-----TGTTGCTCGGTGAACCCCT----- mirR 19 81
-----TGTTGCTCGGTGAACCCC----- mirR 18 73
-----TGTTGCTCGGTGAACCCCTTT----- mirR 22 69
-----TGTTGCTCGGTGAACCCCTTTTC----- mirR 23 54
-----ATGTTGCTCGGTGAACCCCTTT----- mirR 22 34
-----ACGAATGTTGCTCGGTGAACCCCT----- mirR 24 14
-----ATGTTGCTCGGTGAACCCC----- mirR 18 7
-----TGTTGCTCGGTGAACCCCTTTTC----- mirR 24 4
-----ACGAATGTTGCTCGGTGAACCCCTTT----- mirR 26 2
-----ACGAATGTTGCTCGGTGAACCCCTTT----- mirR 25 2
-----ACGAATGTTGCTCGGTGAAC----- mirR 20 1
-----ATGTTGCTCGGTGAACCCCTTT----- mirR 23 1
-----ACGAATGTTGCTCGGTGAACCCC----- mirR 23 1
-----ACGAATGTTGCTCGGTGAACCCCTTTTC----- mirR 28 1
-----ACGAATGTTGCTCGGTGA----- mirR 18 1
-----TTCGGTATCAAATCCCTC----- morR 18 1
-----TTTCGGTATCAAATCCCTCCAG----- morR 22 1
-----TTTCGGTATCAAATCCCTCCA----- morR 21 1

```

>mmu-let-7c-2

```

GACTGACGGCCTTTGGGGTGAGGTAGTAGGTTGTATGGTTTTGGGCTCTGCCCCGCTCTGCGGTAAC TATAACAATCTACTGTCTTTCCCTGAAGTGCCGCAATATCTGCAGTGGATACAAC species len reads
-CTGACGGCCTTTGGGGT----- morL 18 2
--CTGACGGCCTTTGGGGTG----- morL 18 1
GACTGACGGCCTTTGGGG----- morL 18 1
---TGACGGCCTTTGGGGTGA----- morL 18 1
-----TGAGGTAGTAGGTTGTATGGTT----- mirL 22 115068
-----TGAGGTAGTAGGTTGTATGGTT----- mirL 23 18763

```



```

-----TGAGGTAGTAGGTTGTATGGT----- mirL 21 7817
-----GAGGTAGTAGGTTGTATGGTT----- mirL 21 5192
-----TGAGGTAGTAGGTTGTATGGTTTT----- mirL 24 4554
-----TGAGGTAGTAGGTTGTATGG----- mirL 20 3891
-----GAGGTAGTAGGTTGTATGGTTTT----- mirL 22 1153
-----TGAGGTAGTAGGTTGTATGGTTTTG----- mirL 25 681
-----TGAGGTAGTAGGTTGTATG----- mirL 19 618
-----GAGGTAGTAGGTTGTATGGTTTT----- mirL 23 321
-----GAGGTAGTAGGTTGTATGGT----- mirL 20 268
-----GAGGTAGTAGGTTGTATGG----- mirL 19 263
-----GAGGTAGTAGGTTGTATGGTTTTG----- mirL 24 48
-----GAGGTAGTAGGTTGTATG----- mirL 18 34
-----AGGTAGTAGGTTGTATGGTT----- mirL 20 23
-----GTGAGGTAGTAGGTTGTATGGTT----- mirL 23 15
-----AGGTAGTAGGTTGTATGGTTTT----- mirL 21 12
-----GGTAGTAGGTTGTATGGTT----- mirL 19 10
-----GTGAGGTAGTAGGTTGTATGGT----- mirL 22 7
-----GGTAGTAGGTTGTATGGTTTT----- mirL 20 2
-----AGGTAGTAGGTTGTATGGT----- mirL 19 2
-----GGTGAGGTAGTAGGTTGTATGGTT----- mirL 24 1
-----GGTAGTAGGTTGTATGGTTTT----- mirL 21 1
-----GGGTGAGGTAGTAGGTTGTATG----- mirL 22 1
-----GTGAGGTAGTAGGTTGTAT----- mirL 19 1
-----GTGAGGTAGTAGGTTGTATGGTTTT----- mirL 24 1
-----AGGTAGTAGGTTGTATGGTTTT----- mirL 22 1
-----TTGGGCTCTGCCCCGCTCTGCGGT----- loop 24 2
-----CTATACAATCTACTGTCTTTCCTG----- mirR 24 12
-----CTATACAATCTACTGTCTTTCCTGA----- mirR 25 2
-----CTATACAATCTACTGTCTTTCCTGAA----- mirR 26 2
-----CTATACAATCTACTGTCTTTCCTGAAG----- mirR 27 2
-----TATACAATCTACTGTCTTTCCTGA----- mirR 24 1
-----CTGAAGTGGCCGCAATATCTGCAGTGGATACAAC morR 34 1
-----AGTGGCCGCAATATCTGCAG----- morR 20 1
-----AAGTGGCCGCAATATCTG----- morR 18 1
-----TGAAGTGGCCGCAATATCTGCAGTGGATACA-- morR 31 1

```

>mmu-mir-107

```

CTCGATATTTTCTCTGTGCTTTCAGCTTCTTTACAGTGTGCTTGTGGCATGGAGTTCAAGCAGCATTGTACAGGGCTATCAAAGCACAGAGAGCTCGCGACAGCCAA species len reads
---GATATTTTCTCTGTGCT----- morL 18 4
---ATATTTTCTCTGTGCTTTC----- morL 20 3
---CGATATTTTCTCTGTGCT----- morL 19 3
---TATTTTCTCTGTGCTTTC----- morL 19 2
---TCGATATTTTCTCTGTGCT----- morL 20 2
---GATATTTTCTCTGTGCT----- morL 19 1
CTCGATATTTTCTCTGTGCT----- morL 21 1
CTCGATATTTTCTCTGTGCT----- morL 22 1

```

```

-----TATTTTTCTCTGTGCTTTCA----- morL 20 1
-----AGCTTCTTTACAGTGTTCCTTGT----- mirL 24 199
-----AGCTTCTTTACAGTGTTCCTTG----- mirL 23 139
-----AGCTTCTTTACAGTGTTCCT----- mirL 21 79
-----CAGCTTCTTTACAGTGTTCCTTG----- mirL 24 44
-----CAGCTTCTTTACAGTGTTCCTTGT----- mirL 25 35
-----AGCTTCTTTACAGTGTTCCTT----- mirL 22 28
-----AGCTTCTTTACAGTGTTC----- mirL 19 24
-----AGCTTCTTTACAGTGTG----- mirL 18 19
-----CAGCTTCTTTACAGTGTTCCTT----- mirL 23 14
-----AGCTTCTTTACAGTGTTCCT----- mirL 20 9
-----CAGCTTCTTTACAGTGTTCCT----- mirL 22 8
-----CAGCTTCTTTACAGTGTG----- mirL 19 8
-----CAGCTTCTTTACAGTGT----- mirL 18 4
-----CAGCTTCTTTACAGTGTTCCT----- mirL 21 3
-----GCTTCTTTACAGTGTTCCTTG----- mirL 22 1
-----TGTGGCATGGAGTTCAAG----- loop 18 7
-----GTGGCATGGAGTTCAAGC----- loop 18 1
-----AGCAGCATTGTACAGGGCTATC----- mirR 22 82251
-----AGCAGCATTGTACAGGGCTATCA----- mirR 23 65947
-----AGCAGCATTGTACAGGGCTATCAA----- mirR 24 6931
-----AGCAGCATTGTACAGGGCTATCAAA----- mirR 25 912
-----CAGCATTGTACAGGGCTATC----- mirR 20 894
-----CAGCATTGTACAGGGCTATCA----- mirR 21 352
-----AGCAGCATTGTACAGGGCTATCAAAG----- mirR 26 183
-----GCAGCATTGTACAGGGCTATCA----- mirR 22 118
-----CAGCATTGTACAGGGCTATCAA----- mirR 22 91
-----GCAGCATTGTACAGGGCTATC----- mirR 21 66
-----AGCATTGTACAGGGCTATC----- mirR 19 45
-----AGCAGCATTGTACAGGGCTATCAAAGC----- mirR 27 43
-----AAGCAGCATTGTACAGGGCTATC----- mirR 23 26
-----AGCATTGTACAGGGCTATCA----- mirR 20 26
-----AAGCAGCATTGTACAGGGCTATCA----- mirR 24 23
-----CAGCATTGTACAGGGCTATCAAA----- mirR 23 13
-----AGCAGCATTGTACAGGGCTATCAAAGCA----- mirR 28 9
-----GCAGCATTGTACAGGGCTATCAA----- mirR 23 5
-----AGCATTGTACAGGGCTATCAA----- mirR 21 2
-----GCAGCATTGTACAGGGCTATCAAA----- mirR 24 1
-----CAAGCAGCATTGTACAGGGCTATC----- mirR 24 1
-----AAGCAGCATTGTACAGGGCTATCAA----- mirR 25 1
-----AAGCAGCATTGTACAGGGCTATCAA----- mirR 25 1
-----AAGCAGCATTGTACAGGGCTATCAA----- morR 26 2
-----AAGCAGCATTGTACAGGGCTATCAA----- morR 21 2
-----AAGCAGCATTGTACAGGGCTATCAA----- morR 22 1
-----AAGCAGCATTGTACAGGGCTATCAA----- morR 20 1
-----AAGCAGCATTGTACAGGGCTATCAA----- morR 25 1
-----AAGCAGCATTGTACAGGGCTATCAA----- morR 19 1

```

```

>mmu-mir-421
CCTAATCCGGTGCACATTGTAGGCCTATTAAATGTTTGTGTTGAATGAAAAATGAATCATCAACAGACATTAATTGGGCGCCTGCTCTGTGATCTCCATGGGCT species len reads
-----TCCGGTGCACATTGTAGGC----- morL 19 58
----ATCCGGTGCACATTGTAGGC----- morL 20 24
----CCGGTGCACATTGTAGGC----- morL 18 6
----TCCGGTGCACATTGTAGG----- morL 18 5
---AATCCGGTGCACATTGTAGGC----- morL 21 4
---ATCCGGTGCACATTGTAG----- morL 18 3
--TAATCCGGTGCACATTGTAGGC----- morL 22 2
--AATCCGGTGCACATTGTA----- morL 18 1
CCTAATCCGGTGCACATTGTAGGC----- morL 24 1
-----GGCCTCATTAAATGTTTGTG----- mirL 21 2532
-----GGCCTCATTAAATGTTTGTGA----- mirL 22 211
-----GGCCTCATTAAATGTTTGT----- mirL 20 169
-----GGCCTCATTAAATGTTTGT----- mirL 19 154
----CTCATTAAATGTTTGTGTTGAAT----- mirL 21 135
----GGCCTCATTAAATGTTTGT----- mirL 18 98
----CTCATTAAATGTTTGTGTTGAATGA----- mirL 23 51
-----GCCTCATTAAATGTTTGTG----- mirL 20 32
----GGCCTCATTAAATGTTTGTGTTGAA----- mirL 23 27
-----CCTCATTAAATGTTTGTG----- mirL 19 25
----CTCATTAAATGTTTGTGTTGAATG----- mirL 22 17
-----CTCATTAAATGTTTGTG----- mirL 18 15
----GCCCTCATTAAATGTTTGT----- mirL 18 10
----CCTCATTAAATGTTTGTGTTGAAT----- mirL 22 10
----CTCATTAAATGTTTGTGTTGA----- mirL 19 9
----GGCCTCATTAAATGTTTGTGTTGAAT----- mirL 24 7
----CTCATTAAATGTTTGTGTTGAA----- mirL 20 6
----CCTCATTAAATGTTTGTGTTGA----- mirL 20 5
----AGGCCTCATTAAATGTTTGTGTTGA----- mirL 23 3
----AGGCCTCATTAAATGTTTGTGTTG----- mirL 22 3
----CCTCATTAAATGTTTGTGTT----- mirL 18 2
----AGGCCTCATTAAATGTTTGTGTT----- mirL 21 2
----GCCCTCATTAAATGTTTGTGTT----- mirL 19 1
----CCTCATTAAATGTTTGTGTTGAATGA----- mirL 24 1
----GTAGGCCTCATTAAATGTTT----- mirL 20 1
----AGGCCTCATTAAATGTTT----- mirL 18 1
-----TGAATGAAAAAATGAATC----- loop 18 7
-----AATGAAAAAATGAATCAT----- loop 18 2
-----TTGAATGAAAAAATGAAT----- loop 18 1
-----GAATGAAAAAATGAATCA----- loop 18 1
-----ATGAAAAAATGAATCATC----- loop 18 1
-----ATCAACAGACATTAATTGGGCGC----- mirR 23 75065
-----ATCAACAGACATTAATTGGG----- mirR 20 27174
-----ATCAACAGACATTAATTGGGCGCC----- mirR 24 14761

```

```

-----ATCAACAGACATTAATTGGGCG----- mirR 22 13278
-----TCAACAGACATTAATTGGGCGC----- mirR 22 5547
-----ATCAACAGACATTAATTGGGCGCCT----- mirR 25 5043
-----ATCAACAGACATTAATTGGGC----- mirR 21 2324
-----TCAACAGACATTAATTGGG----- mirR 19 2017
-----ATCAACAGACATTAATTGGGCGCCTG----- mirR 26 1797
-----CAACAGACATTAATTGGGCGC----- mirR 21 995
-----TCAACAGACATTAATTGGGCGCC----- mirR 23 695
-----TCAACAGACATTAATTGGGCG----- mirR 21 597
-----CAACAGACATTAATTGGGCGCC----- mirR 22 311
-----AACAGACATTAATTGGGCGCCTGC----- mirR 24 218
-----CAACAGACATTAATTGGG----- mirR 18 181
-----AACAGACATTAATTGGGCGC----- mirR 20 105
-----TCAACAGACATTAATTGGGCGCCT----- mirR 24 94
-----TCAACAGACATTAATTGGGC----- mirR 20 93
-----AACAGACATTAATTGGGCGCCTG----- mirR 23 93
-----CAACAGACATTAATTGGGCG----- mirR 20 67
-----CATCAACAGACATTAATTGGGCGC----- mirR 24 49
-----AACAGACATTAATTGGGCGCCT----- mirR 22 45
-----AACAGACATTAATTGGGCGCC----- mirR 21 36
-----AACAGACATTAATTGGGCG----- mirR 19 35
-----CAACAGACATTAATTGGGCGCCT----- mirR 23 25
-----TCAACAGACATTAATTGG----- mirR 18 20
-----CAACAGACATTAATTGGGC----- mirR 19 14
-----CAACAGACATTAATTGGGCGCCTG----- mirR 24 14
-----AACAGACATTAATTGGGCGCCTGCT----- mirR 25 14
-----ATCATCAACAGACATTAATTGGG----- mirR 23 7
-----CATCAACAGACATTAATTGGG----- mirR 21 6
-----ATCATCAACAGACATTAA----- mirR 18 4
-----CATCAACAGACATTAATTGGGC----- mirR 22 3
-----CATCAACAGACATTAATTGGGCG----- mirR 23 2
-----TCATCAACAGACATTAATTGGG----- mirR 22 1
-----CATCAACAGACATTAATTGGGCGCC----- mirR 25 1
-----CATCAACAGACATTAATTGGGCGCCTG----- mirR 27 1
-----TCATCAACAGACATTAATTGG----- mirR 21 1
-----GCCTGCTCTGTGATCTCCAT----- morR 20 2
-----CTGCTCTGTGATCTCCATGGG----- morR 21 1
-----CTGCTCTGTGATCTCCATGGGCT----- morR 23 1
-----GCCTGCTCTGTGATCTCC----- morR 18 1
-----CTCTGTGATCTCCATGGG----- morR 18 1
-----GCTCTGTGATCTCCATGGGC----- morR 20 1

```

>mmu-mir-199b

```

GAGGATACCTCCACTCCGTCTACCCAGTGTTTAGACTACCTGTTTCAGGACTCCCAAATTGTACAGTAGTCTGCACATTGGTTAGGCTGGGCTGGGTTAGACCCTCGGCACCGTCGCTGGAGA species len read
-----CCTCCACTCCGTCTACCC----- morL 18 6
GAGGATACCTCCACTCCGT----- morL 19 4

```

```

-AGGATACCTCCACTCCGT----- morL 18 2
---ATACCTCCACTCCGTCTA----- morL 18 2
--GGATACCTCCACTCCGTC----- morL 18 2
---TACCTCCACTCCGTCTAC----- morL 18 1
----ACCTCCACTCCGTCTACC----- morL 18 1
-----CCCAGTGTTTAGACTACCTGTTC----- mirL 23 89722
-----CCCAGTGTTTAGACTACCTGTT----- mirL 22 40883
-----CCCAGTGTTTAGACTACCTGTTC----- mirL 24 8422
-----CCCAGTGTTTAGACTACCTGT----- mirL 21 6490
-----CCCAGTGTTTAGACTACCTGTTCAG----- mirL 25 1354
-----CCCAGTGTTTAGACTACCTG----- mirL 20 625
-----CCCAGTGTTTAGACTACCT----- mirL 19 399
-----CCAGTGTTTAGACTACCTGTTC----- mirL 22 119
-----CCAGTGTTTAGACTACCTGTT----- mirL 21 51
-----CAGTGTTTAGACTACCTGTTC----- mirL 21 17
-----CCAGTGTTTAGACTACCTGTTC----- mirL 23 16
-----ACCCAGTGTTTAGACTACCTGTTC----- mirL 24 13
-----AGTGTTTAGACTACCTGTTC----- mirL 20 8
-----CCAGTGTTTAGACTACCTGTTCAG----- mirL 24 8
-----AGTGTTTAGACTACCTGTT----- mirL 19 7
-----CTACCCAGTGTTTAGACTACCTGTTC----- mirL 26 5
-----CCAGTGTTTAGACTACCTGT----- mirL 20 4
-----ACCCAGTGTTTAGACTACCTGTT----- mirL 23 3
-----CTACCCAGTGTTTAGACTACCTGTT----- mirL 25 3
-----TACCCAGTGTTTAGACTACCTGTTC----- mirL 25 2
-----AGTGTTTAGACTACCTGT----- mirL 18 1
-----CCAGTGTTTAGACTACCTG----- mirL 19 1
-----CAGTGTTTAGACTACCTGTTCAG----- mirL 23 1
-----ACCCAGTGTTTAGACTACCTGTTCAG----- mirL 26 1
-----CAGTGTTTAGACTACCTGT----- mirL 19 1
-----AGGACTCCCAAATTGTACAGTAGTCTGCACATTGG----- loop 35 1
-----GGCTGGGCTGGGTTAGACCC----- mirR 20 6
-----GGCTGGGCTGGGTTAGACCCT----- mirR 21 4
-----GCTGGGCTGGGTTAGACCCT----- mirR 20 1
-----AGGCTGGGCTGGGTTAGAC----- mirR 19 1
-----GGCTGGGCTGGGTTAGACC----- mirR 19 1
-----TTAGGCTGGGCTGGGTTA----- mirR 18 1
-----GGCTGGGCTGGGTTAGACCCTCG----- mirR 23 1
-----CTCGGCACCGTCGCTGGA----- morR 18 1
-----CGGCACCGTCGCTGGAGA----- morR 18 1

```

>mmu-mir-337

```

AGTGAGAAGTTGGGGGGTGGGAACGGCGTCATGCAGGAGTTGATTGCACAGCCATTCAGCTCCTATATGATGCCTTTCTTACCCCCTTCAACCG species len reads
-GTGAGAAGTTGGGGGGTGGGAAC----- morL 22 11
---GAGAAGTTGGGGGGTGGGAAC----- morL 21 4
---GAGAAGTTGGGGGGTGGGAAC----- morL 20 2

```

```

-----AAGTTGGGGGGTGGGAAC----- morL 18 1
----AGAAGTTGGGGGGTGGGA----- morL 18 1
-GTGAGAAGTTGGGGGGTGGGAAC----- morL 23 1
AGTGAGAAGTTGGGGGGTGGGAAC----- morL 24 1
-GTGAGAAGTTGGGGGGTGG----- morL 19 1
---GAGAAGTTGGGGGGTGGGA----- morL 19 1
---AGAAGTTGGGGGGTGGGA----- morL 19 1
---GAGAAGTTGGGGGGTGGG----- morL 18 1
-----CGGCGTCATGCAGGAGTTGATT----- mirL 22 28704
-----CGGCGTCATGCAGGAGTTGAT----- mirL 21 4033
-----CGGCGTCATGCAGGAGTTGATTG----- mirL 23 1674
-----AACGGCGTCATGCAGGAGTTGA----- mirL 22 896
-----CGGCGTCATGCAGGAGTTGA----- mirL 20 855
-----GAACGGCGTCATGCAGGAGTT----- mirL 21 832
-----GGCGTCATGCAGGAGTTGATTG----- mirL 22 677
-----GGCGTCATGCAGGAGTTGATT----- mirL 21 665
-----GAACGGCGTCATGCAGGAGTTG----- mirL 22 644
-----GAACGGCGTCATGCAGGAGTTGA----- mirL 23 543
-----CGGCGTCATGCAGGAGTTG----- mirL 19 523
-----AACGGCGTCATGCAGGAGTTG----- mirL 21 369
-----CGGCGTCATGCAGGAGTT----- mirL 18 250
-----GGCGTCATGCAGGAGTTGA----- mirL 19 201
-----CGGCGTCATGCAGGAGTTGATTGC----- mirL 24 195
-----AACGGCGTCATGCAGGAGTTGAT----- mirL 23 152
-----GGCGTCATGCAGGAGTTGAT----- mirL 20 133
-----ACGGCGTCATGCAGGAGTTGAT----- mirL 22 100
-----ACGGCGTCATGCAGGAGTTGA----- mirL 21 86
-----GGCGTCATGCAGGAGTTGATTGC----- mirL 23 85
-----GAACGGCGTCATGCAGGAGT----- mirL 20 82
-----GAACGGCGTCATGCAGGAGTTGAT----- mirL 24 81
-----GAACGGCGTCATGCAGGAG----- mirL 19 47
-----GGCGTCATGCAGGAGTTGATTGCAC----- mirL 25 35
-----ACGGCGTCATGCAGGAGTTGATT----- mirL 23 29
-----ACGGCGTCATGCAGGAGTTG----- mirL 20 26
-----GGCGTCATGCAGGAGTTG----- mirL 18 23
-----AACGGCGTCATGCAGGAGTT----- mirL 20 17
-----ACGGCGTCATGCAGGAGTT----- mirL 19 14
-----AACGGCGTCATGCAGGAGTTGATT----- mirL 24 9
-----ACGGCGTCATGCAGGAGTTGATTG----- mirL 24 7
-----AACGGCGTCATGCAGGAGTTGATTG----- mirL 25 7
-----GAACGGCGTCATGCAGGAGTTGATT----- mirL 25 6
-----GCGTCATGCAGGAGTTGATTG----- mirL 21 5
-----GCGTCATGCAGGAGTTGATT----- mirL 20 4
-----AACGGCGTCATGCAGGAGTTGATTGC----- mirL 26 3
-----ACGGCGTCATGCAGGAGT----- mirL 18 1
-----CGTCATGCAGGAGTTGATTG----- mirL 20 1

```

```

-----TCAGCTCCTATATGATGCCTTT----- mirR 22 48544
-----TTCAGCTCCTATATGATGCCTTT----- mirR 23 12153
-----TCAGCTCCTATATGATGCCTTTC----- mirR 23 9966
-----TTCAGCTCCTATATGATGCCTT----- mirR 22 9212
-----TTCAGCTCCTATATGATGCCT----- mirR 21 7124
-----TTCAGCTCCTATATGATGCCTTTC----- mirR 24 2887
-----CAGCTCCTATATGATGCCTTT----- mirR 21 2425
-----TCAGCTCCTATATGATGCCTT----- mirR 21 2146
-----AGCTCCTATATGATGCCTTTC----- mirR 21 1999
-----TCAGCTCCTATATGATGCCT----- mirR 20 1001
-----AGCTCCTATATGATGCCTTT----- mirR 20 757
-----AGCTCCTATATGATGCCTTTCT----- mirR 22 647
-----TCAGCTCCTATATGATGCCTTTCT----- mirR 24 573
-----CAGCTCCTATATGATGCCTTTC----- mirR 22 528
-----AGCTCCTATATGATGCCTTTCTT----- mirR 23 463
-----TTCAGCTCCTATATGATGCC----- mirR 20 329
-----TTCAGCTCCTATATGATGCCTTTCT----- mirR 25 254
-----AGCTCCTATATGATGCCTTTCTTC----- mirR 24 225
-----TTCAGCTCCTATATGATGC----- mirR 19 123
-----TCAGCTCCTATATGATGCC----- mirR 19 115
-----AGCTCCTATATGATGCCTTTCTTCA----- mirR 25 77
-----TCAGCTCCTATATGATGC----- mirR 18 76
-----CAGCTCCTATATGATGCCTT----- mirR 20 70
-----AGCTCCTATATGATGCCTT----- mirR 19 32
-----CAGCTCCTATATGATGCCT----- mirR 19 28
-----GCTCCTATATGATGCCTTT----- mirR 19 24
-----CAGCTCCTATATGATGCCTTTCT----- mirR 23 21
-----ATTCAGCTCCTATATGATGCCTT----- mirR 23 13
-----ATTCAGCTCCTATATGATGCCTTT----- mirR 24 9
-----GCTCCTATATGATGCCTT----- mirR 18 8
-----GCTCCTATATGATGCCTTTCTTC----- mirR 23 8
-----GCTCCTATATGATGCCTTTC----- mirR 20 7
-----ATTCAGCTCCTATATGATGCCT----- mirR 22 7
-----CAGCTCCTATATGATGCC----- mirR 18 3
-----CATTCAGCTCCTATATGATGCCTTTC----- mirR 26 2
-----ATTCAGCTCCTATATGATGCCTTTC----- mirR 25 1
-----GCTCCTATATGATGCCTTTCT----- mirR 21 1
-----CATTCAGCTCCTATATGATGCCTT----- mirR 24 1
-----CAGCTCCTATATGATGCCTTTCTT----- mirR 24 1
-----CATTCAGCTCCTATATGAT----- mirR 19 1
-----CTTCACCCCTTCAACCG morR 18 2
-----TTTCTTCACCCCTTCAA--- morR 18 2

```

>mmu-mir-322  
CTCGTTGACTCCGAAGGGCTGCAGCAGCAATTCATGTTTTGGAGTATTGCCAAGGTTCAAACATGAAGCGCTGCAACACCCCTTCGTGGGAATGT species len reads  
CTCGTTGACTCCGAAGGGCT----- morL 20 1

```

-----TTGACTCCGAAGGGCTGC----- morL 18 1
CTCGTTGACTCCGAAGGG----- morL 18 1
-----CAGCAGCAATTCATGTTTTGGA----- mirL 22 114707
-----CAGCAGCAATTCATGTTTTGG----- mirL 21 5644
-----CAGCAGCAATTCATGTTTTGGAG----- mirL 23 4332
-----GCAGCAGCAATTCATGTTTTGGA----- mirL 23 1916
-----CAGCAGCAATTCATGTTTTG----- mirL 20 1555
-----GCAGCAGCAATTCATGTTTTG----- mirL 21 885
-----CAGCAGCAATTCATGTTTTGGAGT----- mirL 24 743
-----GCAGCAGCAATTCATGTTTTGG----- mirL 22 502
-----CAGCAGCAATTCATGTTTT----- mirL 19 166
-----CAGCAGCAATTCATGTTT----- mirL 18 134
-----GCAGCAGCAATTCATGTTTTGGAG----- mirL 24 107
-----AGCAGCAATTCATGTTTTGGA----- mirL 21 106
-----GCAGCAGCAATTCATGTTTT----- mirL 20 103
-----AGCAGCAATTCATGTTTTGG----- mirL 20 32
-----GCAGCAATTCATGTTTTGGA----- mirL 20 31
-----CAGCAATTCATGTTTTGGA----- mirL 19 22
-----GCAGCAGCAATTCATGTTT----- mirL 19 13
-----GCAGCAGCAATTCATGTT----- mirL 18 13
-----CAGCAATTCATGTTTTGG----- mirL 18 11
-----GCAGCAATTCATGTTTTGG----- mirL 19 8
-----AGCAGCAATTCATGTTTTG----- mirL 19 8
-----AGCAGCAATTCATGTTTTGGAG----- mirL 22 3
-----TGCAGCAGCAATTCATGTTTTGG----- mirL 23 2
-----TGCAGCAGCAATTCATGTTTTG----- mirL 22 2
-----TGCAGCAGCAATTCATGTTTTGGA----- mirL 24 2
-----AGCAGCAATTCATGTTTTGGAGT----- mirL 23 1
-----GAGTATTGCCAAGGTTCA----- loop 18 17
-----GAGTATTGCCAAGGTTCAA----- loop 19 2
-----GGAGTATTGCCAAGGTTCC----- loop 18 1
-----AAACATGAAGCGCTGCAACA----- mirR 20 4091
-----AAACATGAAGCGCTGCAACAC----- mirR 21 2073
-----CAAAACATGAAGCGCTGCAACA----- mirR 22 1569
-----AAAACATGAAGCGCTGCAACA----- mirR 21 479
-----AAACATGAAGCGCTGCAAC----- mirR 19 474
-----AAACATGAAGCGCTGCAACACC----- mirR 22 452
-----CAAAACATGAAGCGCTGCAAC----- mirR 21 398
-----AAAACATGAAGCGCTGCAACAC----- mirR 22 130
-----AAACATGAAGCGCTGCAA----- mirR 18 119
-----AAACATGAAGCGCTGCAAC----- mirR 20 116
-----CAAAACATGAAGCGCTGCAA----- mirR 20 91
-----AAACATGAAGCGCTGCAACACCC----- mirR 23 91
-----CAAAACATGAAGCGCTGCAACAC----- mirR 23 72
-----ACATGAAGCGCTGCAACA----- mirR 18 69
-----AACATGAAGCGCTGCAACA----- mirR 19 67

```



```

-----AAAACATGAAGCGCTGCAA----- mirR 19 24
-----AAACATGAAGCGCTGCAACACCCC----- mirR 24 20
-----CAAAACATGAAGCGCTGCA----- mirR 19 19
-----AAAACATGAAGCGCTGCA----- mirR 18 13
-----CAAAACATGAAGCGCTGCAACACC----- mirR 24 13
-----AAAACATGAAGCGCTGCAACACC----- mirR 23 11
-----AACATGAAGCGCTGCAACAC----- mirR 20 8
-----ACATGAAGCGCTGCAACAC----- mirR 19 5
-----AACATGAAGCGCTGCAAC----- mirR 18 5
-----TCAAAACATGAAGCGCTGCAACA----- mirR 23 4
-----CAAAACATGAAGCGCTGC----- mirR 18 4
-----TCAAAACATGAAGCGCTGCAA----- mirR 21 2
-----TCAAAACATGAAGCGCTGCAAC----- mirR 22 1
-----AAAACATGAAGCGCTGCAACACCC----- mirR 24 1
-----TCAAAACATGAAGCGCTG----- mirR 18 1
-----ACCCCTTCGTGGGGAATGT morR 19 2

```

>mmu-mir-30b

```

CTCAAGTCTCTCTAAGCCAAGTTTCAGTTCATGTAACATCCTACACTCAGCTGTCATACATGCGTTGGCTGGGATGTGGATGTTTACGTGAGTATCCACCAGT species len reads
-----CTCTAAGCCAAGTTTCAGTTCA----- morL 22 71
-----TCTAAGCCAAGTTTCAGTTCA----- morL 21 12
-----TCTCTAAGCCAAGTTTCAGTT----- morL 21 10
-----GTCTCTCTAAGCCAAGTTTCAGTTCA----- morL 28 5
-----CTCTCTAAGCCAAGTTTCAGTTCA----- morL 24 3
-----CTCTAAGCCAAGTTTCAGTTC----- morL 21 3
-----TCTCTAAGCCAAGTTTCAGTTCA----- morL 23 2
-----CTCTAAGCCAAGTTTCAGTTCAT----- morL 23 2
-----GCCAAGTTTCAGTTCATGT----- morL 19 1
-----CTAAGCCAAGTTTCAGTTCA----- morL 20 1
-----AAGCCAAGTTTCAGTTCA----- morL 18 1
-----GCCAAGTTTCAGTTCATG----- morL 18 1
-----AGCCAAGTTTCAGTTCA----- morL 18 1
CTCAAGTCTCTCTAAGCCAAGTTTCAGTTC----- morL 32 1
-----TCTCTAAGCCAAGTTTCAGTT----- morL 23 1
-----TGTAACATCCTACACTCAGCT----- mirL 22 11150
-----TGTAACATCCTACACTCAGCTG----- mirL 23 10009
-----GTAACATCCTACACTCAGCT----- mirL 21 6018
-----TGTAACATCCTACACTCAGC----- mirL 21 4488
-----TGTAACATCCTACACTCAGCTGT----- mirL 24 3483
-----TGTAACATCCTACACTCAGCTGTC----- mirL 25 2039
-----GTAACATCCTACACTCAGCTG----- mirL 22 868
-----TGTAACATCCTACACTCAG----- mirL 20 601
-----GTAACATCCTACACTCAGC----- mirL 20 389
-----TGTAACATCCTACACTCA----- mirL 19 276
-----GTAACATCCTACACTCAGCTGT----- mirL 23 273
-----GTAACATCCTACACTCAGCTGTC----- mirL 24 182

```

```

-----GTAAACATCCTACACTCAG----- mirL 19 58
-----AAACATCCTACACTCAGCT----- mirL 19 54
-----TAAACATCCTACACTCAGCT----- mirL 20 36
-----ATGTAAACATCCTACACTCAGCT----- mirL 23 21
-----GTAAACATCCTACACTCAGCTGTCA----- mirL 25 18
-----AAACATCCTACACTCAGC----- mirL 18 18
-----ATGTAAACATCCTACACTCAGCTG----- mirL 24 12
-----TAAACATCCTACACTCAGC----- mirL 19 6
-----AAACATCCTACACTCAGCTGTC----- mirL 22 2
-----TAAACATCCTACACTCAGCTGTCA----- mirL 24 1
-----TCATGTAAACATCCTACACTCAGCT----- mirL 25 1
-----ATGTAAACATCCTACACTCAGC----- mirL 22 1
-----TAAACATCCTACACTCAGCTGTC----- mirL 23 1
-----ATGTAAACATCCTACACT----- mirL 18 1
-----TCATGTAAACATCCTACA----- mirL 18 1
-----ATGTAAACATCCTACACTCAGCTGT----- mirL 25 1
-----AAACATCCTACACTCAGCTGT----- mirL 21 1
-----AAACATCCTACACTCAGCTG----- mirL 20 1
-----CATGTAAACATCCTACACTC----- mirL 20 1
-----GTCATACATGCGTTGGCTG----- loop 19 2
-----CTGGGATGTGGATGTTTACGTC----- mirR 22 281
-----CTGGGATGTGGATGTTTACGT----- mirR 21 244
-----CTGGGATGTGGATGTTTACGTCA----- mirR 23 137
-----CTGGGATGTGGATGTTTAC----- mirR 19 33
-----CTGGGATGTGGATGTTTA----- mirR 18 25
-----CTGGGATGTGGATGTTTACG----- mirR 20 18
-----TGGGATGTGGATGTTTACGTCA----- mirR 22 17
-----GGGATGTGGATGTTTACGTC----- mirR 20 9
-----TGGGATGTGGATGTTTACGTC----- mirR 21 9
-----CTGGGATGTGGATGTTTACGTCAG----- mirR 24 7
-----GGGATGTGGATGTTTACG----- mirR 18 6
-----GCTGGGATGTGGATGTTTACGT----- mirR 22 4
-----GGGATGTGGATGTTTACGT----- mirR 19 4
-----GCTGGGATGTGGATGTTTACGTC----- mirR 23 3
-----TGGGATGTGGATGTTTACGT----- mirR 20 3
-----GCTGGGATGTGGATGTTTACGTCA----- mirR 24 2
-----GCTGGGATGTGGATGTTT----- mirR 18 2
-----GGGATGTGGATGTTTACGTCA----- mirR 21 1
-----GCTGGGATGTGGATGTTTACGTCAG----- mirR 25 1
-----TGGCTGGGATGTGGATGT----- mirR 18 1
-----AGCTGTCTTGGAGTATCCACCAGT morR 24 1
-----TGTCTTGGAGTATCCACCA-- morR 19 1
-----GCTGTCTTGGAGTATCCA---- morR 18 1
-----AGCTGTCTTGGAGTATCCAC-- morR 20 1
-----AGCTGTCTTGGAGTATCCACCA-- morR 22 1
-----CAGCTGTCTTGGAGTATC----- morR 18 1

```

>mmu-mir-361

```

GCTTCACTATGATTCTTTCTTGGGACTCGGAAGCTTATCAGAATCTCCAGGGGTACTTAGTATTTGAAAAGTCCCCAGGTGTGATTCTGATTTGTTTCCCTCTCCTGCTCCTCCTCCTCCTCCTT species len
-----CTTTCTTGGGACTCGGAAGC----- morL 20 9
-----TTCTTGGGACTCGGAAGC----- morL 18 3
GCTTCACTATGATTCTTTCTTGGGACTCGGA----- morL 31 1
-----CTTTCTTGGGACTCGGAAG----- morL 19 1
-----CTTGGGACTCGGAAGCTT----- morL 18 1
-----TTTCTTGGGACTCGGAAGC----- morL 19 1
-----GATTCTTTCTTGGGACTCGGA----- morL 21 1
-----TTATCAGAATCTCCAGGGGTAC----- mirL 22 75941
-----TTATCAGAATCTCCAGGGGTACT----- mirL 23 11733
-----TTATCAGAATCTCCAGGGGTA----- mirL 21 8591
-----TATCAGAATCTCCAGGGGTAC----- mirL 21 4673
-----TTATCAGAATCTCCAGGGGTACTT----- mirL 24 3178
-----TTATCAGAATCTCCAGGGGT----- mirL 20 1603
-----TTATCAGAATCTCCAGGGGTACTTA----- mirL 25 1075
-----TATCAGAATCTCCAGGGGTACT----- mirL 22 699
-----TATCAGAATCTCCAGGGGTA----- mirL 20 624
-----TTATCAGAATCTCCAGGGG----- mirL 19 458
-----TATCAGAATCTCCAGGGGTACTT----- mirL 23 214
-----TATCAGAATCTCCAGGGGT----- mirL 19 96
-----TATCAGAATCTCCAGGGG----- mirL 18 75
-----ATCAGAATCTCCAGGGGTAC----- mirL 20 58
-----TATCAGAATCTCCAGGGGTACTTA----- mirL 24 33
-----CTTATCAGAATCTCCAGGGGTAC----- mirL 23 28
-----CTTATCAGAATCTCCAGGGGTA----- mirL 22 15
-----GCTTATCAGAATCTCCAGGGGTA----- mirL 23 12
-----TCAGAATCTCCAGGGGTAC----- mirL 19 11
-----GCTTATCAGAATCTCCAGGGGTAC----- mirL 24 8
-----ATCAGAATCTCCAGGGGTA----- mirL 19 4
-----CTTATCAGAATCTCCAGGGGTACT----- mirL 24 4
-----TCAGAATCTCCAGGGGTACTT----- mirL 21 3
-----ATCAGAATCTCCAGGGGTACTTAG----- mirL 24 2
-----AGCTTATCAGAATCTCCAGGGGTAC----- mirL 25 2
-----ATCAGAATCTCCAGGGGTACTT----- mirL 22 1
-----AGCTTATCAGAATCTCCAGG----- mirL 20 1
-----AGCTTATCAGAATCTCCAGGG----- mirL 21 1
-----ATCAGAATCTCCAGGGGTACT----- mirL 21 1
-----AGCTTATCAGAATCTCCAG----- mirL 19 1
-----AGCTTATCAGAATCTCCA----- mirL 18 1
-----CTTATCAGAATCTCCAGGGGTACTTA----- mirL 26 1
-----TCAGAATCTCCAGGGGTACT----- mirL 20 1
-----TAGTATTTGAAAAGTCCC----- loop 18 2
-----ACTTAGTATTTGAAAAGTCC----- loop 20 1
-----CCCCAGGTGTGATTCTGATTTGT----- mirR 24 12702

```

```

-----TCCCCCAGGTGTGATTCTGATTTGT----- mirR 25 5772
-----TCCCCCAGGTGTGATTCTGATTTG----- mirR 24 2169
-----TCCCCCAGGTGTGATTCTGATT----- mirR 22 1584
-----TCCCCCAGGTGTGATTCTGATTT----- mirR 23 1370
-----CCCCCAGGTGTGATTCTGATTTG----- mirR 23 1273
-----CCCCCAGGTGTGATTCTGATTTGTT----- mirR 25 356
-----TCCCCCAGGTGTGATTCTGATTTGTT----- mirR 26 183
-----CCCCCAGGTGTGATTCTGATTT----- mirR 22 179
-----TCCCCCAGGTGTGATTCTGAT----- mirR 21 163
-----CCCCCAGGTGTGATTCTGATT----- mirR 21 159
-----TCCCCCAGGTGTGATTCTGA----- mirR 20 107
-----CCCCCAGGTGTGATTCTGATTTGTT----- mirR 26 45
-----CCAGGTGTGATTCTGATT----- mirR 19 34
-----CCCCCAGGTGTGATTCTGA----- mirR 19 23
-----CCCCAGGTGTGATTCTGATT----- mirR 20 13
-----CCCCAGGTGTGATTCTGATTTGT----- mirR 23 12
-----CCAGGTGTGATTCTGATT----- mirR 18 7
-----CCAGGTGTGATTCTGATTT----- mirR 19 5
-----CCCCAGGTGTGATTCTGATTTG----- mirR 22 3
-----GTCCCCCAGGTGTGATTCTGATTTGT----- mirR 26 3
-----CCCAGGTGTGATTCTGATTT----- mirR 20 1
-----CCCCAGGTGTGATTCTGATTTGTT----- mirR 25 1
-----GTCCCCCAGGTGTGATTCTGAT----- mirR 22 1
-----AGTCCCCCAGGTGTGATT----- mirR 18 1
-----TCCCTCTCCTGCTCCTCCTCCT----- morR 23 6
-----TTCCCTCTCCTGCTCCTCCTCCTCCTCC-- morR 29 3
-----TTCCCTCTCCTGCTCCTCCTCCTCCTCC-- morR 31 3
-----CCTCTCCTGCTCCTCCTC----- morR 18 2
-----TCCCTCTCCTGCTCCTCCTC----- morR 18 2
-----TCCCTCTCCTGCTCCTCCTC----- morR 19 1
-----CCCTCTCCTGCTCCTCCTCCTC----- morR 22 1
-----TCCCTCTCCTGCTCCTCCTCCTCCTCC-- morR 28 1
-----TGTTTCCCTCTCCTGCTC----- morR 18 1
-----TTCCCTCTCCTGCTCCTCCTCCTCCT----- morR 26 1
-----CCCTCTCCTGCTCCTCCTC----- morR 19 1
-----TCCCTCTCCTGCTCCTCCTC----- morR 21 1

```

>mmu-mir-666

```

AGATCCTGATTCTGCCTGCGTGGAGCGGGCACAGCTGTGAGAGCCCCCTAGGTACAGCGGGGCTGCAGCGTGATCGCCTGCTCACGCACAGGAAGTGACGACAGCGGTA
CTCAAGCC species len reads
--ATCCTGATTCTGCCTGCG----- morL 18 12
-----TGATTCTGCCTGCGTGG----- morL 18 1
---TCCTGATTCTGCCTGCGTGG----- morL 20 1
AGATCCTGATTCTGCCTGCG----- morL 20 1
-----CTGATTCTGCCTGCGTGG----- morL 18 1
---TGATTCTGCCTGCGTGGAG----- morL 19 1
---CCTGATTCTGCCTGCGTGG----- morL 19 1

```

```

--ATCCTGATTCTGCCTGCGTG----- morL 20 1
-----AGCGGGCACAGCTGTGAGAGCCCC----- mirL 25 1909
-----AGCGGGCACAGCTGTGAGAGCCCC----- mirL 24 1076
-----AGCGGGCACAGCTGTGAGAGCCCCCT----- mirL 26 775
-----AGCGGGCACAGCTGTGAGAGCCC----- mirL 23 707
-----AGCGGGCACAGCTGTGAGAGCCCCCTA----- mirL 27 464
-----AGCGGGCACAGCTGTGAGAGC----- mirL 21 265
-----AGCGGGCACAGCTGTGAGAGCC----- mirL 22 173
-----CGGGCACAGCTGTGAGAGCC----- mirL 20 25
-----GGGCACAGCTGTGAGAGCC----- mirL 19 19
-----GCGGGCACAGCTGTGAGAGCC----- mirL 21 9
-----GCGGGCACAGCTGTGAGAGC----- mirL 20 6
-----GCGGGCACAGCTGTGAGAGCCCC----- mirL 23 3
-----GCGGGCACAGCTGTGAGAGCCC----- mirL 22 3
-----CGGGCACAGCTGTGAGAGC----- mirL 19 2
-----GAGCGGGCACAGCTGTGAGAGCCCC----- mirL 25 2
-----GCGGGCACAGCTGTGAGAGCCCC----- mirL 24 2
-----GCGGGCACAGCTGTGAGAG----- mirL 19 1
-----CGGGCACAGCTGTGAGAGCCC----- mirL 21 1
-----TGGAGCGGGCACAGCTGT----- mirL 18 1
-----GCGGGCACAGCTGTGAGAGCCCCCT----- mirL 25 1
-----GGAGCGGGCACAGCTGTG----- mirL 18 1
-----GGGCACAGCTGTGAGAGCCCCCTA----- mirL 24 1
-----GGGCACAGCTGTGAGAGC----- mirL 18 1
-----GGCTGCAGCGTGATCGCCTGCTCA----- mirR 24 69841
-----GGCTGCAGCGTGATCGCCTGCTCAC----- mirR 25 20486
-----GGCTGCAGCGTGATCGCCTGCTCAG----- mirR 26 11175
-----GGCTGCAGCGTGATCGCCTGCTC----- mirR 23 10703
-----GGCTGCAGCGTGATCGCCTGCT----- mirR 22 6793
-----GCTGCAGCGTGATCGCCTGCTCA----- mirR 23 3370
-----GCTGCAGCGTGATCGCCTGCTCAC----- mirR 24 1760
-----GGCTGCAGCGTGATCGCCTGCTCAGC----- mirR 27 1644
-----GGCTGCAGCGTGATCGCCTGCTC----- mirR 21 994
-----GCTGCAGCGTGATCGCCTGCTCAG----- mirR 25 783
-----GCTGCAGCGTGATCGCCTGCTC----- mirR 22 496
-----GCTGCAGCGTGATCGCCTGCT----- mirR 21 216
-----GCTGCAGCGTGATCGCCTGCTCAGC----- mirR 26 93
-----GGGCTGCAGCGTGATCGCCTGCT----- mirR 23 51
-----GCTGCAGCGTGATCGCCTGCT----- mirR 20 36
-----CTGCAGCGTGATCGCCTGCT----- mirR 20 22
-----GGGCTGCAGCGTGATCGCCTGCTCA----- mirR 25 6
-----CTGCAGCGTGATCGCCTGCTCA----- mirR 22 4
-----GGGGCTGCAGCGTGATCG----- mirR 18 4
-----GGGGCTGCAGCGTGATCGC----- mirR 19 3
-----CTGCAGCGTGATCGCCTGCTC----- mirR 21 2
-----GGGCTGCAGCGTGATCGCCTGCTCAG----- mirR 27 1

```

```

-----GGGGCTGCAGCGTGATCGCCTGC----- mirR 23 1
-----TGCAGCGTGATCGCCTGCTCAC----- mirR 22 1
-----GGGCTGCAGCGTGATCGCCTGCTCAC----- mirR 26 1
-----CGGGCTGCAGCGTGATC----- mirR 18 1
-----GCACAGGAAGTGACGACA----- morR 18 2
-----ACGCACAGGAAGTGACGACAG----- morR 21 1
-----ACGCACAGGAAGTGACGACAGCGGTACTCAAGCC morR 34 1
-----ACGCACAGGAAGTGACGACAGCGGT----- morR 25 1
-----TCACGCACAGGAAGTGACG----- morR 19 1

```

>mmu-mir-744

```

AGCACAGTGGGCTGGGCAAGGTGCGGGCTAGGGCTAACAGCAGTCTTACTGACGGTTTCTTGAAACCACACACATGCTGTTGCCACTAACCTCAACCTTACTCGGTCCTGACCGGCTCGGCT species len re
--CACAGTGGGCTGGGCAAGG----- morL 19 9
-GCACAGTGGGCTGGGCAAGG----- morL 20 6
-GCACAGTGGGCTGGGCAAGGT----- morL 21 5
-GCACAGTGGGCTGGGCAAG----- morL 19 5
--ACAGTGGGCTGGGCAAGG----- morL 18 4
--CACAGTGGGCTGGGCAAGGT----- morL 20 4
--CACAGTGGGCTGGGCAAG----- morL 18 4
AGCACAGTGGGCTGGGCAAG----- morL 20 2
--ACAGTGGGCTGGGCAAGGT----- morL 19 1
-GCACAGTGGGCTGGGCAA----- morL 18 1
AGCACAGTGGGCTGGGCAAGGT----- morL 22 1
-----TGCGGGCTAGGGCTAACAGCA----- mirL 22 83729
-----TGCGGGCTAGGGCTAACAGCAG----- mirL 23 19046
-----TGCGGGCTAGGGCTAACAGC----- mirL 21 4939
-----TGCGGGCTAGGGCTAACAG----- mirL 20 4794
-----TGCGGGCTAGGGCTAACAGCAGT----- mirL 24 4077
-----GCGGGCTAGGGCTAACAGCA----- mirL 21 1221
-----TGCGGGCTAGGGCTAACAGCAGTC----- mirL 25 1110
-----TGCGGGCTAGGGCTAACAG----- mirL 19 1070
-----GCGGGCTAGGGCTAACAGCAG----- mirL 22 420
-----GCGGGCTAGGGCTAACAG----- mirL 19 126
-----GCGGGCTAGGGCTAACAGC----- mirL 20 118
-----GCGGGCTAGGGCTAACAGCAGT----- mirL 23 88
-----GCGGGCTAGGGCTAACAGCAGTC----- mirL 24 38
-----CGGGCTAGGGCTAACAGCA----- mirL 20 25
-----GTGCGGGCTAGGGCTAACAGCA----- mirL 23 17
-----GCGGGCTAGGGCTAACAG----- mirL 18 13
-----GGGGCTAGGGCTAACAGC----- mirL 18 10
-----GGGGCTAGGGCTAACAGCA----- mirL 19 10
-----CGGGCTAGGGCTAACAG----- mirL 18 9
-----GTGCGGGCTAGGGCTAACAG----- mirL 21 6
-----GTGCGGGCTAGGGCTAACAGC----- mirL 22 5
-----CGGGCTAGGGCTAACAGC----- mirL 19 4
-----GGGGCTAGGGCTAACAGCAG----- mirL 20 4

```

```

-----GTGCGGGGCTAGGGCTAACAGCAG----- mirL 24 3
-----GGTGCGGGGCTAGGGCTAACAGCA----- mirL 24 1
-----GTCTTACTGACGGTTTCCTGGAAACCACACAC----- loop 32 11
-----TTACTGACGGTTTCCTGGAAACCACACAC----- loop 29 1
-----CTGTTGCCACTAACCTCAACC----- mirR 21 5213
-----CTGTTGCCACTAACCTCAACCT----- mirR 22 3267
-----CTGTTGCCACTAACCTCAAC----- mirR 20 791
-----CTGTTGCCACTAACCTCAA----- mirR 19 370
-----CTGTTGCCACTAACCTCAACCTT----- mirR 23 172
-----CTGTTGCCACTAACCTCA----- mirR 18 100
-----CTGTTGCCACTAACCTCAACCTTA----- mirR 24 82
-----GTTGCCACTAACCTCAACCT----- mirR 20 64
-----TGTTGCCACTAACCTCAACCT----- mirR 21 40
-----TGCTGTTGCCACTAACCTCAAC----- mirR 22 25
-----TGTTGCCACTAACCTCAACC----- mirR 20 20
-----TTGCCACTAACCTCAACCT----- mirR 19 13
-----TGCTGTTGCCACTAACCTCAA----- mirR 21 7
-----GCTGTTGCCACTAACCTCAA----- mirR 20 7
-----GCTGTTGCCACTAACCTCAACC----- mirR 22 7
-----GTTGCCACTAACCTCAACC----- mirR 19 6
-----ATGCTGTTGCCACTAACCTCAACC----- mirR 24 4
-----TGTTGCCACTAACCTCAAC----- mirR 19 3
-----TGCTGTTGCCACTAACCTCA----- mirR 20 3
-----GCTGTTGCCACTAACCTCAACCT----- mirR 23 2
-----ATGCTGTTGCCACTAACCTCAACC----- mirR 18 2
-----TGCTGTTGCCACTAACCTCAACCT----- mirR 24 1
-----TGTTGCCACTAACCTCAA----- mirR 18 1
-----TGCTGTTGCCACTAACCTCAACC----- mirR 23 1
-----GTTGCCACTAACCTCAACCTT----- mirR 21 1
-----TGTTGCCACTAACCTCAACCTT----- mirR 22 1
-----TGTTGCCACTAACCTCAACCTTAC----- mirR 24 1
-----GTTGCCACTAACCTCAAC----- mirR 18 1
-----TTACTCGGTCCTGACCGGCTC----- morR 21 7
-----ACCTTACTCGGTCCTGAC----- morR 18 5
-----ACCTTACTCGGTCCTGACCG----- morR 20 1
-----TTACTCGGTCCTGACCGGC----- morR 19 1
-----CCTTACTCGGTCCTGACCGG----- morR 20 1
-----TACTCGGTCCTGACCGGCTCGGCT----- morR 24 1

```

>mmu-mir-674

```

GCCTAGTCATCACCTGAGCCTTGCACTGAGATGGGAGTGGTGTAAAGGCTCAGGTATGCACAGCTCCCATCTCAGAACAAGGCTCGGGTGTGCTCAGCTCCCATCTCATCAGC species len reads
---AGTCATCACCTGAGCCTT----- morL 19 200
---TAGTCATCACCTGAGCCTT----- morL 20 123
---GTCATCACCTGAGCCTT----- morL 18 72
---CTAGTCATCACCTGAGCCTT----- morL 21 60
---CTAGTCATCACCTGAGCCT----- morL 20 36

```

---

|                                      |      |    |       |
|--------------------------------------|------|----|-------|
| -CCTAGTCATCACCTGAGCCTT-----          | morL | 22 | 33    |
| ----AGTCATCACCTGAGCCTTG-----         | morL | 20 | 28    |
| ---TAGTCATCACCTGAGCCT-----           | morL | 19 | 20    |
| ----AGTCATCACCTGAGCCT-----           | morL | 18 | 13    |
| ---TAGTCATCACCTGAGCCTTG-----         | morL | 21 | 8     |
| ----GTCATCACCTGAGCCTTG-----          | morL | 19 | 7     |
| ---TAGTCATCACCTGAGCC-----            | morL | 18 | 4     |
| ----AGTCATCACCTGAGCCTTG-----         | morL | 21 | 4     |
| -CCTAGTCATCACCTGAGCCTTG-----         | morL | 23 | 4     |
| ----GTCATCACCTGAGCCTTG-----          | morL | 20 | 2     |
| --CTAGTCATCACCTGAGC-----             | morL | 18 | 2     |
| ---TAGTCATCACCTGAGCCTTG-----         | morL | 22 | 1     |
| ----TCATCACCTGAGCCTTG-----           | morL | 18 | 1     |
| ----ATCACCTGAGCCTTGCA-----           | morL | 18 | 1     |
| -CCTAGTCATCACCTGAGCCT-----           | morL | 21 | 1     |
| GCCTAGTCATCACCTGAGCCTT-----          | morL | 23 | 1     |
| --CTAGTCATCACCTGAGCCTTG-----         | morL | 22 | 1     |
| -----GCACTGAGATGGGAGTGGTGT-----      | mirL | 21 | 22770 |
| -----GCACTGAGATGGGAGTGGTGTAA-----    | mirL | 23 | 10048 |
| -----GCACTGAGATGGGAGTGGTGT-----      | mirL | 22 | 4652  |
| -----GCACTGAGATGGGAGTGGTGTAAAG-----  | mirL | 24 | 4405  |
| -----TGCACTGAGATGGGAGTGGTGT-----     | mirL | 22 | 3204  |
| -----GCACTGAGATGGGAGTGGTGT-----      | mirL | 20 | 1640  |
| -----GCACTGAGATGGGAGTGGTGTAAAG-----  | mirL | 25 | 1223  |
| -----GCACTGAGATGGGAGTGGT-----        | mirL | 19 | 429   |
| -----TGCACTGAGATGGGAGTGGTGTAA-----   | mirL | 24 | 350   |
| -----TGCACTGAGATGGGAGTGGTGT-----     | mirL | 21 | 298   |
| -----CACTGAGATGGGAGTGGTGT-----       | mirL | 20 | 178   |
| -----TGCACTGAGATGGGAGTGGTGT-----     | mirL | 23 | 172   |
| -----TGCACTGAGATGGGAGTGGTGTAAAG----- | mirL | 25 | 141   |
| -----TGCACTGAGATGGGAGTGGT-----       | mirL | 20 | 114   |
| -----CACTGAGATGGGAGTGGTGTAA-----     | mirL | 22 | 96    |
| -----TGCACTGAGATGGGAGTGG-----        | mirL | 19 | 75    |
| -----ACTGAGATGGGAGTGGTGT-----        | mirL | 19 | 35    |
| -----CACTGAGATGGGAGTGGTGT-----       | mirL | 21 | 29    |
| -----CACTGAGATGGGAGTGGTGTAAAG-----   | mirL | 23 | 14    |
| -----TTGCACTGAGATGGGAGTGGTGT-----    | mirL | 24 | 12    |
| -----ACTGAGATGGGAGTGGTGTAA-----      | mirL | 21 | 12    |
| -----ACTGAGATGGGAGTGGTGTAAAGGC-----  | mirL | 24 | 10    |
| -----CACTGAGATGGGAGTGGTGT-----       | mirL | 19 | 10    |
| -----CTGAGATGGGAGTGGTGT-----         | mirL | 18 | 7     |
| -----ACTGAGATGGGAGTGGTGT-----        | mirL | 18 | 3     |
| -----CTGAGATGGGAGTGGTGTAA-----       | mirL | 20 | 3     |
| -----TTGCACTGAGATGGGAGTGGTGT-----    | mirL | 22 | 1     |
| -----CACTGAGATGGGAGTGGTGTAAAG-----   | mirL | 24 | 1     |
| -----TTGCACTGAGATGGGAGTGG-----       | mirL | 19 | 1     |



|                                            |      |    |       |
|--------------------------------------------|------|----|-------|
| -----CACTGAGATGGGAGTGGT-----               | mirL | 18 | 1     |
| -----TTGCACTGAGATGGGAGTGGTGTAAAG-----      | mirL | 27 | 1     |
| -----TTGCACTGAGATGGGAGTGGTGT-----          | mirL | 23 | 1     |
| -----CTGAGATGGGAGTGGTGT-----               | mirL | 19 | 1     |
| -----CACAGCTCCCATCTCAGAACAA-----           | mirR | 22 | 38886 |
| -----CACAGCTCCCATCTCAGAACA-----            | mirR | 21 | 26436 |
| -----CACAGCTCCCATCTCAGAAC-----             | mirR | 20 | 6465  |
| -----CACAGCTCCCATCTCAGAACAAG-----          | mirR | 23 | 2386  |
| -----CACAGCTCCCATCTCAGAA-----              | mirR | 19 | 1084  |
| -----ACAGCTCCCATCTCAGAACAA-----            | mirR | 21 | 312   |
| -----CACAGCTCCCATCTCAGAACAAGG-----         | mirR | 24 | 273   |
| -----CACAGCTCCCATCTCAGA-----               | mirR | 18 | 269   |
| -----ACAGCTCCCATCTCAGAACA-----             | mirR | 20 | 242   |
| -----ACAGCTCCCATCTCAGAACAAG-----           | mirR | 22 | 95    |
| -----AGCTCCCATCTCAGAACA-----               | mirR | 18 | 86    |
| -----CAGCTCCCATCTCAGAACAA-----             | mirR | 20 | 85    |
| -----CAGCTCCCATCTCAGAACA-----              | mirR | 19 | 78    |
| -----ACAGCTCCCATCTCAGAACAAGG-----          | mirR | 23 | 72    |
| -----AGCTCCCATCTCAGAACAA-----              | mirR | 19 | 68    |
| -----ACAGCTCCCATCTCAGAAC-----              | mirR | 19 | 47    |
| -----GCACAGCTCCCATCTCAGAACAA-----          | mirR | 23 | 30    |
| -----TGCACAGCTCCCATCTCAGAAC-----           | mirR | 22 | 13    |
| -----CAGCTCCCATCTCAGAACAAGG-----           | mirR | 22 | 7     |
| -----TGCACAGCTCCCATCTCAGA-----             | mirR | 20 | 6     |
| -----GCACAGCTCCCATCTCAGAACA-----           | mirR | 22 | 5     |
| -----CAGCTCCCATCTCAGAAC-----               | mirR | 18 | 4     |
| -----ACAGCTCCCATCTCAGAACAAGGC-----         | mirR | 24 | 3     |
| -----ACAGCTCCCATCTCAGAA-----               | mirR | 18 | 3     |
| -----TGCACAGCTCCCATCTCAGAACA-----          | mirR | 23 | 2     |
| -----ATGCACAGCTCCCATCTCAGAAC-----          | mirR | 23 | 2     |
| -----TGCACAGCTCCCATCTCAGAACAA-----         | mirR | 24 | 2     |
| -----GCACAGCTCCCATCTCAGAAC-----            | mirR | 21 | 2     |
| -----ATGCACAGCTCCCATCTC-----               | mirR | 18 | 1     |
| -----GCACAGCTCCCATCTCAGAA-----             | mirR | 20 | 1     |
| -----GGCTCGGGTGTGCTCAGCTCCCATCTCATCAG----- | morR | 33 | 5     |
| -----GGCTCGGGTGTGCTCAG-----                | morR | 18 | 3     |
| -----GGCTCGGGTGTGCTCAG-----                | morR | 19 | 1     |
| -----GGCTCGGGTGTGCTCAGCTCC-----            | morR | 21 | 1     |
| -----AGGCTCGGGTGTGCTCAG-----               | morR | 18 | 1     |
| -----GGCTCGGGTGTGCTCAGCTCCC-----           | morR | 22 | 1     |
| -----GGCTCGGGTGTGCTCAGCTCCCATCTCA-----     | morR | 28 | 1     |
| -----GGCTCGGGTGTGCTCAGCTCCCATC-----        | morR | 25 | 1     |
| -----AAGGCTCGGGTGTGCTCA-----               | morR | 18 | 1     |

>mmu-mir-365-1

TTGGTTACCGCAGGGAAAATGAGGGACTTTTGGGGGCAGATGTGTTTCCATTCCGCTATCATAATGCCCTAAAAATCCTTATTGCTCTTGCAAGTATTCCTCGG species len reads

```

-TGGTTACCGCAGGGAAAA----- morL 18 2
--GGTTACCGCAGGGAAAAAT----- morL 18 1
---GTTACCGCAGGGAAAAATG----- morL 18 1
TTGGTTACCGCAGGGAAA----- morL 18 1
-----AGGGACTTTTGGGGGCAGATGTG----- mirL 23 191
-----AGGGACTTTTGGGGGCAGATGTGT----- mirL 24 154
-----AGGGACTTTTGGGGGCAGATGT----- mirL 22 82
-----GGACTTTTGGGGGCAGATGTGT----- mirL 22 14
-----GGGACTTTTGGGGGCAGATGTG----- mirL 22 10
-----GGGACTTTTGGGGGCAGATGT----- mirL 21 8
-----AGGGACTTTTGGGGGCAGATG----- mirL 21 7
-----GGGACTTTTGGGGGCAGATGTGT----- mirL 23 7
-----AGGGACTTTTGGGGGCAGATGTGTTT----- mirL 26 7
-----AGGGACTTTTGGGGGCAGAT----- mirL 20 6
-----GAGGGACTTTTGGGGGCA----- mirL 18 5
-----TGAGGGACTTTTGGGGGCAGATGT----- mirL 24 2
-----TGAGGGACTTTTGGGGGCAGATGTG----- mirL 25 2
-----GGACTTTTGGGGGCAGATGTG----- mirL 21 2
-----TGAGGGACTTTTGGGGGCAGATG----- mirL 23 1
-----ATGAGGGACTTTTGGGGG----- mirL 18 1
-----AGGGACTTTTGGGGGCAGA----- mirL 19 1
-----GGGACTTTTGGGGGCAGA----- mirL 18 1
-----TGAGGGACTTTTGGGGGC----- mirL 18 1
-----TAATGCCCTAAAAATCCTTAT----- mirR 22 96681
-----AATGCCCTAAAAATCCTTAT----- mirR 21 14869
-----TAATGCCCTAAAAATCCTTA----- mirR 21 6806
-----TAATGCCCTAAAAATCCTTATT----- mirR 23 4308
-----AATGCCCTAAAAATCCTTATT----- mirR 22 933
-----AATGCCCTAAAAATCCTTA----- mirR 20 901
-----TAATGCCCTAAAAATCCTT----- mirR 20 635
-----TAATGCCCTAAAAATCCTTATTG----- mirR 24 256
-----TAATGCCCTAAAAATCCT----- mirR 19 155
-----AATGCCCTAAAAATCCTTATTG----- mirR 23 88
-----ATGCCCTAAAAATCCTTAT----- mirR 20 65
-----AATGCCCTAAAAATCCTT----- mirR 19 52
-----ATGCCCTAAAAATCCTTA----- mirR 19 36
-----TGCCCTAAAAATCCTTAT----- mirR 19 35
-----TAATGCCCTAAAAATCC----- mirR 18 32
-----AATGCCCTAAAAATCCT----- mirR 18 30
-----ATAATGCCCTAAAAATCCTTAT----- mirR 23 27
-----AATGCCCTAAAAATCCTTATTGC----- mirR 24 12
-----TGCCCTAAAAATCCTTA----- mirR 18 4
-----ATAATGCCCTAAAAATCCTTA----- mirR 22 3
-----ATGCCCTAAAAATCCTTATT----- mirR 21 3
-----CATAATGCCCTAAAAATCCTT----- mirR 22 3
-----CATAATGCCCTAAAAATCCTTA----- mirR 23 3

```

```

-----CATAATGCCCTAAAAATCCTTAT----- mirR 24 2
-----ATAATGCCCTAAAAATCCTT----- mirR 21 2
-----CATAATGCCCTAAAAATCCT----- mirR 21 1
-----TCATAATGCCCTAAAAATCCTTAT----- mirR 25 1
-----ATAATGCCCTAAAAATC----- mirR 18 1
-----TCTTGCAGTATTCCCTCGG morR 18 1
-----TATTGCTCTTGCAGTATT----- morR 18 1

>mmu-mir-365-2
AAGGACAGCAAGAAAAATGAGGGACTTTCAGGGGCAGCTGTGTTTCCTGACTCAGTCATAATGCCCTAAAAATCCTTATTGTTCTTGCAGTGTGCATCGGAGC species len reads
AAGGACAGCAAGAAAAATGA----- morL 20 5
-AGGACAGCAAGAAAAATG----- morL 18 4
---ACAGCAAGAAAAATGAGG----- morL 18 4
-AGGACAGCAAGAAAAATGAG----- morL 20 1
-----AGGGACTTTCAGGGGCAGCT----- mirL 20 89
-----AGGGACTTTCAGGGGCAGCTG----- mirL 21 58
-----AGGGACTTTCAGGGGCAGCTGT----- mirL 24 51
-----AGGGACTTTCAGGGGCAGCTGT----- mirL 22 36
-----AGGGACTTTCAGGGGCAGC----- mirL 19 34
-----AGGGACTTTCAGGGGCAGCTGT----- mirL 23 29
-----GAGGGACTTTCAGGGGCA----- mirL 18 7
-----GGGACTTTCAGGGGCAGCTGT----- mirL 23 4
-----GGACTTTCAGGGGCAGCTG----- mirL 19 4
-----GGGACTTTCAGGGGCAGCTGT----- mirL 21 4
-----AGGGACTTTCAGGGGCAGCTGTGTTT----- mirL 26 4
-----GGGACTTTCAGGGGCAGC----- mirL 18 2
-----GAGGGACTTTCAGGGGCAGCTGT----- mirL 24 2
-----GAGGGACTTTCAGGGGCAGCTGT----- mirL 23 2
-----GACTTTCAGGGGCAGCTG----- mirL 18 2
-----GGGACTTTCAGGGGCAGCTG----- mirL 20 2
-----GGACTTTCAGGGGCAGCTGT----- mirL 20 1
-----GAGGGACTTTCAGGGGCAGCT----- mirL 21 1
-----GAGGGACTTTCAGGGGCAGCTG----- mirL 22 1
-----GAGGGACTTTCAGGGGCAG----- mirL 19 1
-----CTGTGTTTCCTGACTCAG----- loop 18 1
-----TAATGCCCTAAAAATCCTTAT----- mirR 22 96681
-----AATGCCCTAAAAATCCTTAT----- mirR 21 14869
-----TAATGCCCTAAAAATCCTTA----- mirR 21 6806
-----TAATGCCCTAAAAATCCTTATT----- mirR 23 4309
-----AATGCCCTAAAAATCCTTATT----- mirR 22 933
-----AATGCCCTAAAAATCCTTA----- mirR 20 901
-----TAATGCCCTAAAAATCCTT----- mirR 20 635
-----TAATGCCCTAAAAATCCTTATTG----- mirR 24 256
-----TAATGCCCTAAAAATCCT----- mirR 19 155
-----AATGCCCTAAAAATCCTTATTG----- mirR 23 88
-----ATGCCCTAAAAATCCTTAT----- mirR 20 65

```

```

-----AATGCCCTAAAAATCCTT----- mirR 19 52
-----ATGCCCTAAAAATCCTTA----- mirR 19 36
-----TGCCCTAAAAATCCTTAT----- mirR 19 35
-----TAATGCCCTAAAAATCC----- mirR 18 32
-----AATGCCCTAAAAATCCT----- mirR 18 30
-----ATAATGCCCTAAAAATCCTTAT----- mirR 23 27
-----TGCCCTAAAAATCCTTA----- mirR 18 4
-----ATAATGCCCTAAAAATCCTTA----- mirR 22 3
-----CATAATGCCCTAAAAATCCTT----- mirR 22 3
-----CATAATGCCCTAAAAATCCTTA----- mirR 23 3
-----ATGCCCTAAAAATCCTTATT----- mirR 21 3
-----CATAATGCCCTAAAAATCCTTAT----- mirR 24 2
-----ATAATGCCCTAAAAATCCTT----- mirR 21 2
-----CATAATGCCCTAAAAATCCT----- mirR 21 1
-----AATGCCCTAAAAATCCTTATTGTT----- mirR 25 1
-----ATAATGCCCTAAAAATC----- mirR 18 1
-----TCATAATGCCCTAAAAATCCTTAT----- mirR 25 1
-----ATTGTTCTTGCAGTGTGC----- morR 18 3
-----GTTCTTGCAGTGTGCATCGGAGC morR 23 1
-----TATTGTTCTTGCAGTGTG----- morR 18 1
-----ATTGTTCTTGCAGTGTGCATCG---- morR 22 1

```

>mmu-mir-34c

```

CTTTTTCTGAGTCTAGTTACTAGGCAGTGTAGTTAGCTGATTGCTAATAGTACCAATCACTAACCACACAGCCAGGTAAAAAGACTGAAATTCCTCCGAC species len reads
-----TCTGAGTCTAGTTACTAG----- morL 18 3
-----TTTTCTGAGTCTAGTTACT----- morL 19 1
CTTTTTCTGAGTCTAGTTACT----- morL 22 1
-----TTCTGAGTCTAGTTACTAG----- morL 19 1
-----CTGAGTCTAGTTACTAGG----- morL 18 1
-----TTCTGAGTCTAGTTACTA----- morL 18 1
-----AGGCAGTGTAGTTAGCTGATTGC----- mirL 23 74092
-----AGGCAGTGTAGTTAGCTGATTG----- mirL 22 9832
-----AGGCAGTGTAGTTAGCTGATTGCT----- mirL 24 3352
-----AGGCAGTGTAGTTAGCTGATT----- mirL 21 2748
-----AGGCAGTGTAGTTAGCTGAT----- mirL 20 1131
-----AGGCAGTGTAGTTAGCTGATTGCTA----- mirL 25 388
-----AGGCAGTGTAGTTAGCTGA----- mirL 19 387
-----TAGGCAGTGTAGTTAGCTGATTG----- mirL 23 208
-----TAGGCAGTGTAGTTAGCTGATT----- mirL 22 118
-----TAGGCAGTGTAGTTAGCTGATTGC----- mirL 24 114
-----GGCAGTGTAGTTAGCTGATTGC----- mirL 22 38
-----GCAGTGTAGTTAGCTGATTGC----- mirL 21 37
-----TAGGCAGTGTAGTTAGCTGA----- mirL 20 19
-----TAGGCAGTGTAGTTAGCTGAT----- mirL 21 15
-----CAGTGTAGTTAGCTGATTGC----- mirL 20 15
-----CTAGGCAGTGTAGTTAGCTGATTGC----- mirL 25 12

```

```

-----GGCAGTGTAGTTAGCTGATTG----- mirL 21 12
-----TAGGCAGTGTAGTTAGCTGATTGCT----- mirL 25 5
-----GCAGTGTAGTTAGCTGATTG----- mirL 20 5
-----CAGTGTAGTTAGCTGATTG----- mirL 19 3
-----GCAGTGTAGTTAGCTGAT----- mirL 18 2
-----GGCAGTGTAGTTAGCTGAT----- mirL 19 2
-----GGCAGTGTAGTTAGCTGATT----- mirL 20 1
-----GCAGTGTAGTTAGCTGATT----- mirL 19 1
-----CTAGGCAGTGTAGTTAGCTGATTG----- mirL 24 1
-----AATCACTAACCACACAGCCAGG----- mirR 22 14327
-----AATCACTAACCACACAGCCAGGT----- mirR 23 8065
-----AATCACTAACCACACAGCCAGGTA----- mirR 24 2928
-----AATCACTAACCACACAGCCAG----- mirR 21 2536
-----ATCACTAACCACACAGCCAGG----- mirR 21 1166
-----ATCACTAACCACACAGCCAGGT----- mirR 22 994
-----AATCACTAACCACACAGCCAGGTAA----- mirR 25 849
-----AATCACTAACCACACAGCCA----- mirR 20 600
-----AATCACTAACCACACAGCC----- mirR 19 123
-----ATCACTAACCACACAGCCAGGTA----- mirR 23 119
-----ATCACTAACCACACAGCCAG----- mirR 20 115
-----TCACTAACCACACAGCCAGGT----- mirR 21 75
-----ATCACTAACCACACAGCCA----- mirR 19 40
-----ATCACTAACCACACAGCCAGGTAA----- mirR 24 23
-----CACTAACCACACAGCCAGG----- mirR 19 18
-----ATCACTAACCACACAGCC----- mirR 18 9
-----TCACTAACCACACAGCCAG----- mirR 19 8
-----TCACTAACCACACAGCCAGG----- mirR 20 7
-----ACCAATCACTAACCACACAGCCA----- mirR 23 7
-----TCACTAACCACACAGCCAGGTA----- mirR 22 5
-----CACTAACCACACAGCCAG----- mirR 18 2
-----ACCAATCACTAACCACAC----- mirR 18 1
-----CACTAACCACACAGCCAGGTA----- mirR 21 1
-----CCAATCACTAACCACACAGCCAGG----- mirR 24 1
-----ACCAATCACTAACCACACAGCCAG----- mirR 24 1
-----CCAATCACTAACCACACAGCCA----- mirR 22 1
-----CAATCACTAACCACACAGCCAGGT----- mirR 24 1
-----CCAATCACTAACCACACAGCCAG----- mirR 23 1
-----TCACTAACCACACAGCCAGGTAAA----- mirR 24 1
-----AAAAGACTGAAATTCCTCC----- morR 19 2
-----AAAAAGACTGAAATTCCTCC----- morR 20 2
-----AAAAGACTGAAATTCCTC----- morR 18 1
-----TAAAAAGACTGAAATTCCTC----- morR 20 1
-----AGGTAAAAAGACTGAAATT----- morR 19 1
-----AAAGACTGAAATTCCTCCGAC----- morR 21 1

```

>mmu-mir-124-1

|                                                                                                                    | species | len | reads |
|--------------------------------------------------------------------------------------------------------------------|---------|-----|-------|
| CTTCCTCAGGAGAAAGGCCTCTCTCCGTGTTACAGCGGACCTTGATTTAAATGTCCATACAATTAAGGCACGCGGTGAATGCCAAGAATGGGGCTGTCTGAGCACCTTGGGTCC | morL    | 18  | 3     |
| -----AGAAAGGCCTCTCTCTCC-----                                                                                       | morL    | 18  | 2     |
| -----GAAAGGCCTCTCTCTCCG-----                                                                                       | morL    | 20  | 2     |
| -----TCAGGAGAAAGGCCTCTCTC-----                                                                                     | morL    | 18  | 2     |
| -----AGGAGAAAGGCCTCTCTC-----                                                                                       | morL    | 19  | 1     |
| -----AGGAGAAAGGCCTCTCTCT-----                                                                                      | morL    | 26  | 1     |
| CTTCCTCAGGAGAAAGGCCTCTCTCT-----                                                                                    | morL    | 19  | 1     |
| -----GAGAAAGGCCTCTCTCTCC-----                                                                                      | morL    | 19  | 1     |
| -----TCAGGAGAAAGGCCTCTCTC-----                                                                                     | morL    | 19  | 1     |
| -----TCAGGAGAAAGGCCTCTCTCTC-----                                                                                   | morL    | 22  | 1     |
| -----GAGAAAGGCCTCTCTCTCCGT-----                                                                                    | morL    | 21  | 1     |
| -----AGGAGAAAGGCCTCTCTCTC-----                                                                                     | morL    | 20  | 1     |
| -----CCTCAGGAGAAAGGCCTCTCTC-----                                                                                   | morL    | 22  | 1     |
| -----GAAAGGCCTCTCTCTCCGT-----                                                                                      | morL    | 19  | 1     |
| -----CCTCAGGAGAAAGGCCTCTCTC-----                                                                                   | morL    | 21  | 1     |
| -----AAAGGCCTCTCTCTCCGT-----                                                                                       | morL    | 18  | 1     |
| -----CGTGTTACAGCGGACCTTGAT-----                                                                                    | mirL    | 22  | 3545  |
| -----CGTGTTACAGCGGACCTTGA-----                                                                                     | mirL    | 21  | 1404  |
| -----CGTGTTACAGCGGACCTTGATT-----                                                                                   | mirL    | 23  | 414   |
| -----CGTGTTACAGCGGACCTTG-----                                                                                      | mirL    | 20  | 271   |
| -----CGTGTTACAGCGGACCTT-----                                                                                       | mirL    | 19  | 125   |
| -----CGTGTTACAGCGGACCT-----                                                                                        | mirL    | 18  | 57    |
| -----CGTGTTACAGCGGACCTTGATTT-----                                                                                  | mirL    | 24  | 44    |
| -----GTGTTACAGCGGACCTTGA-----                                                                                      | mirL    | 20  | 38    |
| -----GTGTTACAGCGGACCTTGAT-----                                                                                     | mirL    | 21  | 17    |
| -----TGTTACAGCGGACCTTGA-----                                                                                       | mirL    | 19  | 10    |
| -----GTTACAGCGGACCTTGA-----                                                                                        | mirL    | 18  | 10    |
| -----TGTTACAGCGGACCTTGAT-----                                                                                      | mirL    | 20  | 8     |
| -----GTGTTACAGCGGACCTTG-----                                                                                       | mirL    | 19  | 6     |
| -----TGTTACAGCGGACCTTGATT-----                                                                                     | mirL    | 21  | 4     |
| -----GTTACAGCGGACCTTGAT-----                                                                                       | mirL    | 19  | 4     |
| -----CCGTGTTACAGCGGACCTTGA-----                                                                                    | mirL    | 22  | 4     |
| -----GTGTTACAGCGGACCTTGATT-----                                                                                    | mirL    | 22  | 4     |
| -----TGTTACAGCGGACCTTGATTT-----                                                                                    | mirL    | 22  | 2     |
| -----GTGTTACAGCGGACCTTGATTT-----                                                                                   | mirL    | 23  | 1     |
| -----ATTTAAATGTCCATACAATT-----                                                                                     | loop    | 20  | 1     |
| -----TAAGGCACGCGGTGAATGCCA-----                                                                                    | mirR    | 21  | 35233 |
| -----TAAGGCACGCGGTGAATGCCAA-----                                                                                   | mirR    | 22  | 32365 |
| -----TAAGGCACGCGGTGAATGCCAAG-----                                                                                  | mirR    | 23  | 21531 |
| -----TAAGGCACGCGGTGAATGCC-----                                                                                     | mirR    | 20  | 4796  |
| -----TAAGGCACGCGGTGAATGCCAAGA-----                                                                                 | mirR    | 24  | 3504  |
| -----TTAAGGCACGCGGTGAATGCCA-----                                                                                   | mirR    | 22  | 3423  |
| -----AAGGCACGCGGTGAATGCCAA-----                                                                                    | mirR    | 21  | 3359  |
| -----AAGGCACGCGGTGAATGCCA-----                                                                                     | mirR    | 20  | 3184  |
| -----AAGGCACGCGGTGAATGCCAAG-----                                                                                   | mirR    | 22  | 2324  |
| -----TAAGGCACGCGGTGAATGC-----                                                                                      | mirR    | 19  | 2053  |

```

-----TTAAGGCACGCGGTGAATGCCAA----- mirR 23 1808
-----TTAAGGCACGCGGTGAATGCCAAG----- mirR 24 1338
-----TAAGGCACGCGGTGAATGCCAAGAA----- mirR 25 415
-----TTAAGGCACGCGGTGAATGCC----- mirR 21 400
-----AAGGCACGCGGTGAATGCCAAGA----- mirR 23 300
-----TTAAGGCACGCGGTGAATGCCAAGA----- mirR 25 286
-----AAGGCACGCGGTGAATGCC----- mirR 19 274
-----AAGGCACGCGGTGAATGCC----- mirR 18 221
-----TTAAGGCACGCGGTGAATGCC----- mirR 20 135
-----TTAAGGCACGCGGTGAATGCCAAGAA----- mirR 26 47
-----AAGGCACGCGGTGAATGCCAAGAA----- mirR 24 43
-----AGGCACGCGGTGAATGCC----- mirR 18 35
-----ATTAAGGCACGCGGTGAATGCCA----- mirR 23 11
-----AGGCACGCGGTGAATGCCAAG----- mirR 21 10
-----AGGCACGCGGTGAATGCCA----- mirR 20 8
-----ATTAAGGCACGCGGTGAATGCCA----- mirR 24 7
-----AGGCACGCGGTGAATGCCA----- mirR 19 7
-----GGCACGCGGTGAATGCCA----- mirR 18 5
-----GGCACGCGGTGAATGCCA----- mirR 19 3
-----AATTAAGGCACGCGGTGAATGCCA----- mirR 25 2
-----AATTAAGGCACGCGGTGAATGCCAAG----- mirR 26 2
-----GGCACGCGGTGAATGCCAAG----- mirR 20 1
-----ATTAAGGCACGCGGTGAATGCCAAG----- mirR 25 1
-----ATTAAGGCACGCGGTGAATGCC----- mirR 22 1
-----AAGAATGGGGCTGTCTGA----- morR 18 2
-----GAATGGGGCTGTCTGAGCACCTTGGGT-- morR 27 2
-----AATGGGGCTGTCTGAGCACCT----- morR 21 1
-----CAAGAATGGGGCTGTCTG----- morR 18 1
-----GAATGGGGCTGTCTGAGCA----- morR 19 1
-----GAATGGGGCTGTCTGAGCACCTTG----- morR 24 1
-----AGAATGGGGCTGTCTGAG----- morR 18 1
-----GAATGGGGCTGTCTGAGCAC----- morR 20 1
-----GAATGGGGCTGTCTGAGCACCTTGGGTCC morR 29 1
-----GAATGGGGCTGTCTGAGCACC----- morR 21 1

```

>mmu-mir-124-2

```

CAAGATCAGAGACTCTGCTCTCCGTGTTACAGCGGACCTTGATTTAATGTCATACAATTAAGGCACGCGGTGAATGCCAAGAGCGGAGCCTACGGCTGCAC species len reads
-AAGATCAGAGACTCTGCT----- morL 18 3
-----AGAGACTCTGCTCTCCGT----- morL 18 2
-----ATCAGAGACTCTGCTCTCC----- morL 19 2
-----ATCAGAGACTCTGCTCTC----- morL 18 1
-----TCAGAGACTCTGCTCTCC----- morL 18 1
CAAGATCAGAGACTCTGCTC----- morL 20 1
CAAGATCAGAGACTCTGCT----- morL 19 1
-----CGTGTTACAGCGGACCTTGAT----- mirL 22 3545
-----CGTGTTACAGCGGACCTTGA----- mirL 21 1404

```

```

-----CGTGTTACACAGCGGACCTTGATT----- mirL 23 414
-----CGTGTTACACAGCGGACCTTG----- mirL 20 271
-----CGTGTTACACAGCGGACCTT----- mirL 19 125
-----CGTGTTACACAGCGGACCT----- mirL 18 57
-----CGTGTTACACAGCGGACCTTGATT----- mirL 24 44
-----GTGTTACACAGCGGACCTTGA----- mirL 20 38
-----GTGTTACACAGCGGACCTTGAT----- mirL 21 17
-----TGTTACACAGCGGACCTTGA----- mirL 19 10
-----GTTACACAGCGGACCTTGA----- mirL 18 10
-----TGTTACACAGCGGACCTTGA----- mirL 20 8
-----GTGTTACACAGCGGACCTTG----- mirL 19 6
-----CCGTGTTACACAGCGGACCTTGA----- mirL 22 4
-----GTGTTACACAGCGGACCTTGATT----- mirL 22 4
-----TGTTACACAGCGGACCTTGATT----- mirL 21 4
-----GTTACACAGCGGACCTTGAT----- mirL 19 4
-----TGTTACACAGCGGACCTTGATT----- mirL 22 2
-----GTGTTACACAGCGGACCTTGATT----- mirL 23 1
-----GATTTAATGTCATACAAT----- loop 18 41
-----ATTTAATGTCATACAATT----- loop 18 1
-----TAAGGCACGCGGTGAATGCCA----- mirR 21 35233
-----TAAGGCACGCGGTGAATGCCAA----- mirR 22 32365
-----TAAGGCACGCGGTGAATGCCAAG----- mirR 23 21531
-----TAAGGCACGCGGTGAATGCC----- mirR 20 4796
-----TAAGGCACGCGGTGAATGCCAAGA----- mirR 24 3504
-----TTAAGGCACGCGGTGAATGCCA----- mirR 22 3423
-----AAGGCACGCGGTGAATGCCAA----- mirR 21 3359
-----AAGGCACGCGGTGAATGCCA----- mirR 20 3184
-----AAGGCACGCGGTGAATGCCAAG----- mirR 22 2324
-----TAAGGCACGCGGTGAATGC----- mirR 19 2053
-----TTAAGGCACGCGGTGAATGCCAA----- mirR 23 1808
-----TTAAGGCACGCGGTGAATGCCAAG----- mirR 24 1338
-----TTAAGGCACGCGGTGAATGCC----- mirR 21 400
-----AAGGCACGCGGTGAATGCCAAGA----- mirR 23 300
-----TTAAGGCACGCGGTGAATGCCAAGA----- mirR 25 286
-----AAGGCACGCGGTGAATGCC----- mirR 19 274
-----TAAGGCACGCGGTGAATGCCAAGAG----- mirR 25 262
-----AAGGCACGCGGTGAATGC----- mirR 18 221
-----TTAAGGCACGCGGTGAATGC----- mirR 20 135
-----TTAAGGCACGCGGTGAATGCCAAGAG----- mirR 26 36
-----AGGCACGCGGTGAATGCC----- mirR 18 35
-----AAGGCACGCGGTGAATGCCAAGAG----- mirR 24 23
-----ATTAAGGCACGCGGTGAATGCCA----- mirR 23 11
-----AGGCACGCGGTGAATGCCAAG----- mirR 21 10
-----AGGCACGCGGTGAATGCCAA----- mirR 20 8
-----ATTAAGGCACGCGGTGAATGCCAA----- mirR 24 7
-----AGGCACGCGGTGAATGCCA----- mirR 19 7

```



```

-----GGCACGCGGTGAATGCCA----- mirR 18 5
-----GGCACGCGGTGAATGCCAA----- mirR 19 3
-----AATTAAGGCACGCGGTGAATGCCAA----- mirR 25 2
-----AATTAAGGCACGCGGTGAATGCCAAG----- mirR 26 2
-----GGCACGCGGTGAATGCCAAG----- mirR 20 1
-----ATTAAGGCACGCGGTGAATGCCAAG----- mirR 25 1
-----ATTAAGGCACGCGGTGAATGCC----- mirR 22 1
-----GAGCGGAGCCTACGGCTGCAC morR 21 1
-----AGCGGAGCCTACGGCTGC-- morR 18 1
-----CCAAGAGCGGAGCCTACG----- morR 18 1

>mmu-mir-124-3
GCAGCCCTGAGGGCCCTCTGCGTGTTCACAGCGGACCTTGATTTAATGTCTATACAATTAAGGCACGCGGTGAATGCCAAGAGGGCGCCTCCGCCGCTC species len reads
-CAGCCCTGAGGGCCCTCTG----- morL 20 3
-CAGCCCTGAGGGCCCTC----- morL 18 1
--GCCCTGAGGGCCCTCTGC----- morL 19 1
-CAGCCCTGAGGGCCCTCT----- morL 19 1
GCAGCCCTGAGGGCCCTC----- morL 19 1
-----CGTGTTCACAGCGGACCTTGAT----- mirL 22 3545
-----CGTGTTCACAGCGGACCTTGA----- mirL 21 1404
-----CGTGTTCACAGCGGACCTTGATT----- mirL 23 414
-----CGTGTTCACAGCGGACCTTG----- mirL 20 271
-----CGTGTTCACAGCGGACCTT----- mirL 19 125
-----CGTGTTCACAGCGGACCT----- mirL 18 57
-----CGTGTTCACAGCGGACCTTGATT----- mirL 24 44
-----GTGTTCACAGCGGACCTTGA----- mirL 20 38
-----GTGTTCACAGCGGACCTTGAT----- mirL 21 17
-----TGTTACAGCGGACCTTGA----- mirL 19 10
-----GTTACAGCGGACCTTGA----- mirL 18 10
-----TGTTACAGCGGACCTTGAT----- mirL 20 8
-----GTGTTCACAGCGGACCTTG----- mirL 19 6
-----GTTACAGCGGACCTTGAT----- mirL 19 4
-----TGTTACAGCGGACCTTGATT----- mirL 21 4
-----GTGTTCACAGCGGACCTTGATT----- mirL 22 4
-----TGTTACAGCGGACCTTGATT----- mirL 22 2
-----GTGTTCACAGCGGACCTTGATT----- mirL 23 1
-----TGCGTGTTCACAGCGGAC----- mirL 18 1
-----ATTTAATGTCTATACAAT----- loop 18 6
-----GATTTAATGTCTATACAA----- loop 18 2
-----TTTAATGTCTATACAATT----- loop 18 1
-----TAAGGCACGCGGTGAATGCCA----- mirR 21 35233
-----TAAGGCACGCGGTGAATGCCAA----- mirR 22 32365
-----TAAGGCACGCGGTGAATGCCAAG----- mirR 23 21531
-----TAAGGCACGCGGTGAATGCC----- mirR 20 4796
-----TAAGGCACGCGGTGAATGCCAAGA----- mirR 24 3504
-----TTAAGGCACGCGGTGAATGCCA----- mirR 22 3423

```

```

-----AAGGCACGCGGTGAATGCCAA----- mirR 21 3359
-----AAGGCACGCGGTGAATGCCA----- mirR 20 3184
-----AAGGCACGCGGTGAATGCCAAG----- mirR 22 2324
-----TAAGGCACGCGGTGAATGC----- mirR 19 2053
-----TTAAGGCACGCGGTGAATGCCAA----- mirR 23 1808
-----TTAAGGCACGCGGTGAATGCCAAG----- mirR 24 1338
-----TTAAGGCACGCGGTGAATGCC----- mirR 21 400
-----AAGGCACGCGGTGAATGCCAAGA----- mirR 23 300
-----TTAAGGCACGCGGTGAATGCCAAGA----- mirR 25 286
-----AAGGCACGCGGTGAATGCC----- mirR 19 274
-----TAAGGCACGCGGTGAATGCCAAGAG----- mirR 25 262
-----AAGGCACGCGGTGAATGC----- mirR 18 221
-----TTAAGGCACGCGGTGAATGC----- mirR 20 135
-----TTAAGGCACGCGGTGAATGCCAAGAG----- mirR 26 36
-----AGGCACGCGGTGAATGCC----- mirR 18 35
-----AAGGCACGCGGTGAATGCCAAGAG----- mirR 24 23
-----ATTAAGGCACGCGGTGAATGCCA----- mirR 23 11
-----AGGCACGCGGTGAATGCCAAG----- mirR 21 10
-----AGGCACGCGGTGAATGCCAA----- mirR 20 8
-----ATTAAGGCACGCGGTGAATGCCAA----- mirR 24 7
-----AGGCACGCGGTGAATGCCA----- mirR 19 7
-----GGCACGCGGTGAATGCCA----- mirR 18 5
-----GGCACGCGGTGAATGCCAA----- mirR 19 3
-----AATTAAGGCACGCGGTGAATGCCAAG----- mirR 26 2
-----AATTAAGGCACGCGGTGAATGCCAA----- mirR 25 2
-----ATTAAGGCACGCGGTGAATGCCAAG----- mirR 25 1
-----GGCACGCGGTGAATGCCAAG----- mirR 20 1
-----ATTAAGGCACGCGGTGAATGCC----- mirR 22 1
-----GAGGCGCCTCCGCCGCTC morR 18 2
-----CAAGAGAGGCGCCTCCGC----- morR 18 1

```

>mmu-mir-532

```

TACAGATTGCTTTTTCTCTTCCATGCCTTGAGTGTAGGACCGTTGACATCTTAATTACCCTCCCACACCCAAGGCTTGCAGGAGAGCAAGCCTTCTCTTCT species len reads
--CAGATTGCTTTTTCTCTTC----- morL 20 13
---AGATTGCTTTTTCTCTTC----- morL 19 8
TACAGATTGCTTTTTCTCTTC----- morL 22 2
---AGATTGCTTTTTCTCTT----- morL 18 2
--CAGATTGCTTTTTCTCTTCC----- morL 21 2
-ACAGATTGCTTTTTCTCT----- morL 19 2
---GATTGCTTTTTCTCTTC----- morL 18 1
---TTGCTTTTTCTCTTCCAT----- morL 18 1
----ATTGCTTTTTCTCTTCCA----- morL 19 1
-----CATGCCTTGAGTGTAGGACCGT----- mirL 22 86991
-----CATGCCTTGAGTGTAGGACCGT----- mirL 23 8607
-----CATGCCTTGAGTGTAGGACCG----- mirL 21 5602
-----CATGCCTTGAGTGTAGGACCGTTG----- mirL 24 3310

```

```

-----CATGCCTTGAGTGTAGGACC----- mirL 20 1130
-----CATGCCTTGAGTGTAGGAC----- mirL 19 831
-----CATGCCTTGAGTGTAGGACCGTTGA----- mirL 25 303
-----ATGCCTTGAGTGTAGGACCGT----- mirL 21 302
-----CCATGCCTTGAGTGTAGGACCGT----- mirL 23 296
-----TGCCTTGAGTGTAGGACCGT----- mirL 20 69
-----GCCTTGAGTGTAGGACCGT----- mirL 19 62
-----GCCTTGAGTGTAGGACCG----- mirL 18 49
-----ATGCCTTGAGTGTAGGACCG----- mirL 20 45
-----CCATGCCTTGAGTGTAGGACCGTT----- mirL 24 36
-----TGCCTTGAGTGTAGGACCG----- mirL 19 19
-----TGCCTTGAGTGTAGGACC----- mirL 18 15
-----ATGCCTTGAGTGTAGGACCGTT----- mirL 22 15
-----ATGCCTTGAGTGTAGGACC----- mirL 19 8
-----ATGCCTTGAGTGTAGGAC----- mirL 18 8
-----CCATGCCTTGAGTGTAGGACCG----- mirL 22 6
-----CCATGCCTTGAGTGTAGGACCGTTG----- mirL 25 6
-----ATGCCTTGAGTGTAGGACCGTTG----- mirL 23 5
-----CCATGCCTTGAGTGTAGGA----- mirL 19 1
-----TGCCTTGAGTGTAGGACCGTTG----- mirL 22 1
-----CCATGCCTTGAGTGTAGGAC----- mirL 20 1
-----CCATGCCTTGAGTGTAGGACCGTTGA----- mirL 26 1
-----GCCTTGAGTGTAGGACCGTTG----- mirL 21 1
-----GCCTTGAGTGTAGGACCGTT----- mirL 20 1
-----TGCCTTGAGTGTAGGACCGTT----- mirL 21 1
-----CGTTGACATCTTAATTAC----- loop 18 1
-----TGACATCTTAATTACCCT----- loop 18 1
-----CGTTGACATCTTAATTACCCT----- loop 21 1
-----CCTCCCACACCCAAGGCTTGCA----- mirR 22 6545
-----CCTCCCACACCCAAGGCTTGC----- mirR 21 3555
-----CCTCCCACACCCAAGGCTTGCAG----- mirR 23 1061
-----CCTCCCACACCCAAGGCTTG----- mirR 20 464
-----CCTCCCACACCCAAGGCTTGCAGG----- mirR 24 339
-----CCTCCCACACCCAAGGCTTGCAGGA----- mirR 25 86
-----CCTCCCACACCCAAGGCTT----- mirR 19 54
-----TCCCACACCCAAGGCTTGCA----- mirR 20 6
-----CTCCCACACCCAAGGCTTGCA----- mirR 21 5
-----TCCCACACCCAAGGCTTG----- mirR 18 4
-----CTCCCACACCCAAGGCTTGC----- mirR 20 3
-----CCCACACCCAAGGCTTGCA----- mirR 19 2
-----TCCCACACCCAAGGCTTGC----- mirR 19 2
-----GGAGAGCAAGCCTTCTCTTCT morR 21 3
-----AGGAGAGCAAGCCTTCTCT morR 19 2
-----AGAGCAAGCCTTCTCTTC morR 18 2
-----AGGAGAGCAAGCCTTCTC morR 18 2
-----GCAGGAGAGCAAGCCTTC morR 18 1

```

```
-----GGAGAGCAAGCCTTCTCTT-- morR 19 1
-----GGAGAGCAAGCCTTCTCT-- morR 18 1

>mmu-mir-345
CCCTTCGTGAAGCCGACACCCAAGTCCAGGCCTGCTGACCCCTAGTCCAGTGCTTGTGGTGGCTACTGGGCCCTGAACTAGGGGTCTGGAGACCTGGGTTTGATCTCCACAGG species len reads
-----CGACACCCAAGTCCAGGCCT----- morL 20 91
-----GACACCCAAGTCCAGGCCT----- morL 19 80
-----ACACCCAAGTCCAGGCCT----- morL 18 51
-----CCGACACCCAAGTCCAGGCC----- morL 20 46
-----CGACACCCAAGTCCAGGCC----- morL 19 27
-----GACACCCAAGTCCAGGCC----- morL 18 16
-----CCGACACCCAAGTCCAGGCCT----- morL 21 11
-----CGACACCCAAGTCCAGGCCTG----- morL 21 11
-----CACCCAAGTCCAGGCCTG----- morL 18 10
-----CGACACCCAAGTCCAGGC----- morL 18 8
-----ACACCCAAGTCCAGGCCTG----- morL 19 8
-----GACACCCAAGTCCAGGCCTG----- morL 20 6
-----CGACACCCAAGTCCAGGC----- morL 32 3
-----CCGACACCCAAGTCCAGGCCTG----- morL 22 2
-----GCCGACACCCAAGTCCAGG----- morL 19 1
-----CGACACCCAAGTCCAGGCCTGC----- morL 22 1
-----CCCAAGTCCAGGCCTGCT----- morL 18 1
-----CCGACACCCAAGTCCAGG----- morL 18 1
-----CCGACACCCAAGTCCAGGC----- morL 19 1
-----GCCGACACCCAAGTCCAGGCCT----- morL 22 1
-----GAAGCCGACACCCAAGTCCAGGCC----- morL 24 1
-----GCTGACCCCTAGTCCAGTGCT----- mirL 21 48593
-----TGCTGACCCCTAGTCCAGTGCT----- mirL 21 15181
-----TGCTGACCCCTAGTCCAGTGCT----- mirL 22 11831
-----GCTGACCCCTAGTCCAGTGCT----- mirL 20 8357
-----GCTGACCCCTAGTCCAGTGCTT----- mirL 22 4409
-----GCTGACCCCTAGTCCAGTGCTTG----- mirL 23 2220
-----TGCTGACCCCTAGTCCAGTGCTT----- mirL 23 1841
-----GCTGACCCCTAGTCCAGTG----- mirL 19 1688
-----TGCTGACCCCTAGTCCAGTG----- mirL 20 1627
-----TGCTGACCCCTAGTCCAGTGCTTG----- mirL 24 1153
-----GCTGACCCCTAGTCCAGTGCTTGT----- mirL 24 664
-----TGACCCCTAGTCCAGTGCTTGT----- mirL 22 508
-----TGCTGACCCCTAGTCCAGTGCTTGT----- mirL 25 413
-----GCTGACCCCTAGTCCAGT----- mirL 18 389
-----TGCTGACCCCTAGTCCAGT----- mirL 19 386
-----TGACCCCTAGTCCAGTGCTTGTGG----- mirL 24 96
-----TGACCCCTAGTCCAGTGCTTGTG----- mirL 23 65
-----TGACCCCTAGTCCAGTGCTT----- mirL 20 37
-----CTGACCCCTAGTCCAGTGCT----- mirL 20 24
-----TGACCCCTAGTCCAGTGCT----- mirL 18 21
```

```

-----CTGACCCCTAGTCCAGTGCTT----- mirL 21 21
-----GACCCCTAGTCCAGTGCTTGT----- mirL 21 20
-----CTGCTGACCCCTAGTCCAGTGC----- mirL 22 14
-----TGACCCCTAGTCCAGTGC TTGGT----- mirL 25 12
-----GACCCCTAGTCCAGTGCT----- mirL 18 11
-----CTGACCCCTAGTCCAGTGC----- mirL 19 8
-----TGACCCCTAGTCCAGTGCTTG----- mirL 21 5
-----CTGCTGACCCCTAGTCCAGTGCT----- mirL 23 3
-----CTGACCCCTAGTCCAGTGCTTG----- mirL 22 2
-----CCTGCTGACCCCTAGTCCAGTGC----- mirL 24 1
-----CTGCTGACCCCTAGTCCAGTGCTT----- mirL 24 1
-----CTGACCCCTAGTCCAGTGC TTGT----- mirL 24 1
-----CTGACCCCTAGTCCAGTGCTTGT----- mirL 23 1
-----GACCCCTAGTCCAGTGCTTG----- mirL 20 1
-----CCTGCTGACCCCTAGTCCAGTG----- mirL 22 1
-----CTGCTGACCCCTAGTCCAGTG----- mirL 21 1
-----CTGCTGACCCCTAGTCCAGTGCTTG----- mirL 25 1
-----CTGCTGACCCCTAGTCCAGT----- mirL 20 1
-----TGTGGTGGCTACTGGGCC----- loop 18 10
-----TGTGGTGGCTACTGGGCC----- loop 19 9
-----TTGTGGTGGCTACTGGGC----- loop 18 2
-----GTGGTGGCTACTGGGCC----- loop 18 1
-----CCCTGAACTAGGGGTCTGGAGA----- mirR 22 9543
-----CCTGAACTAGGGGTCTGGAGA----- mirR 21 4713
-----CCCTGAACTAGGGGTCTGGAG----- mirR 21 2934
-----CCTGAACTAGGGGTCTGGAG----- mirR 20 551
-----CCTGAACTAGGGGTCTGGAGAC----- mirR 22 471
-----CCCTGAACTAGGGGTCTGGAGAC----- mirR 23 354
-----CCTGAACTAGGGGTCTGGAGACC----- mirR 23 194
-----CCCTGAACTAGGGGTCTGGAGACC----- mirR 24 189
-----CCCTGAACTAGGGGTCTGGA----- mirR 20 69
-----CTGAACTAGGGGTCTGGAGA----- mirR 20 59
-----CCCTGAACTAGGGGTCTGGAGACCT----- mirR 25 49
-----CCTGAACTAGGGGTCTGGA----- mirR 19 47
-----CCTGAACTAGGGGTCTGG----- mirR 18 31
-----CCCTGAACTAGGGGTCTGG----- mirR 19 24
-----CCTGAACTAGGGGTCTGGAGACCT----- mirR 24 22
-----TGAACTAGGGGTCTGGAGA----- mirR 19 14
-----CTGAACTAGGGGTCTGGAGAC----- mirR 21 13
-----TGAACTAGGGGTCTGGAGAC----- mirR 20 7
-----GCCCTGAACTAGGGGTCTGGAGA----- mirR 23 4
-----CTGAACTAGGGGTCTGGAG----- mirR 19 3
-----GCCCTGAACTAGGGGTCTGGAG----- mirR 22 3
-----TGAACTAGGGGTCTGGAG----- mirR 18 2
-----CTGAACTAGGGGTCTGGAGACCTG----- mirR 24 1
-----CTGAACTAGGGGTCTGGAGACC----- mirR 22 1

```

```

-----GGGCCCTGAACTAGGGGTCTGG----- mirR 22 1
-----ACCTGGGTTTGATCTCCACA-- morR 20 11
-----AGACCTGGGTTTGATCTC----- morR 18 6
-----TGGGTTTGATCTCCACAG- morR 18 6
-----ACCTGGGTTTGATCTCCACAG- morR 21 3
-----ACCTGGGTTTGATCTCCACAGG morR 22 2
-----ACCTGGGTTTGATCTCCA---- morR 18 2
-----GACCTGGGTTTGATCTCCACAG- morR 22 1

```

>mmu-mir-29c

| CGGTCCATCTCTTACACAGGCTGACCGATTTCTCCTGGTGTTTCAGAGTCTGTTTTTGTCTAGCACCATTTGAAATCGGTTATGATGTAGGGGGAAGAGCACCA | species | len | reads |
|----------------------------------------------------------------------------------------------------------|---------|-----|-------|
| -GGTCCATCTCTTACACAGGCTG-----                                                                             | morL    | 22  | 1     |
| --GTCCATCTCTTACACAGG-----                                                                                | morL    | 18  | 1     |
| CGGTCCATCTCTTACACAGGCTGA-----                                                                            | morL    | 24  | 1     |
| -----ATCTCTTACACAGGCTGA-----                                                                             | morL    | 18  | 1     |
| -----CCATCTCTTACACAGGCT-----                                                                             | morL    | 18  | 1     |
| -----TGACCGATTTCTCCTGGTGTTTC-----                                                                        | mirL    | 22  | 3476  |
| -----ACCGATTTCTCCTGGTGTTTCAGA-----                                                                       | mirL    | 23  | 1135  |
| -----TGACCGATTTCTCCTGGTGTT-----                                                                          | mirL    | 21  | 644   |
| -----TGACCGATTTCTCCTGGTGTTCA-----                                                                        | mirL    | 23  | 349   |
| -----GACCGATTTCTCCTGGTGTT-----                                                                           | mirL    | 20  | 297   |
| -----GACCGATTTCTCCTGGTGTTCA-----                                                                         | mirL    | 22  | 258   |
| -----GACCGATTTCTCCTGGTGTTTCAGA-----                                                                      | mirL    | 24  | 227   |
| -----TGACCGATTTCTCCTGGTGT-----                                                                           | mirL    | 20  | 189   |
| -----GACCGATTTCTCCTGGTGTTTC-----                                                                         | mirL    | 21  | 186   |
| -----TGACCGATTTCTCCTGGTGTTTCAGA-----                                                                     | mirL    | 25  | 159   |
| -----TGACCGATTTCTCCTGGT-----                                                                             | mirL    | 18  | 114   |
| -----ACCGATTTCTCCTGGTGTTTCAG-----                                                                        | mirL    | 22  | 97    |
| -----TGACCGATTTCTCCTGGTGTTTCAGAGT-----                                                                   | mirL    | 27  | 73    |
| -----ACCGATTTCTCCTGGTGTTTCAGAGT-----                                                                     | mirL    | 25  | 50    |
| -----CCGATTTCTCCTGGTGTTTC-----                                                                           | mirL    | 19  | 45    |
| -----GACCGATTTCTCCTGGTGT-----                                                                            | mirL    | 19  | 38    |
| -----ACCGATTTCTCCTGGTGTTTCAG-----                                                                        | mirL    | 21  | 37    |
| -----ACCGATTTCTCCTGGTGTTTC-----                                                                          | mirL    | 20  | 34    |
| -----GACCGATTTCTCCTGGTGTTTCAG-----                                                                       | mirL    | 23  | 31    |
| -----ACCGATTTCTCCTGGTGTTTCAGAG-----                                                                      | mirL    | 24  | 31    |
| -----GACCGATTTCTCCTGGTGTTTCAGAGT-----                                                                    | mirL    | 26  | 23    |
| -----CCGATTTCTCCTGGTGTTTCAGAGT-----                                                                      | mirL    | 24  | 15    |
| -----CCGATTTCTCCTGGTGTTTCAGAG-----                                                                       | mirL    | 22  | 7     |
| -----CCGATTTCTCCTGGTGT-----                                                                              | mirL    | 18  | 5     |
| -----ACCGATTTCTCCTGGTGTT-----                                                                            | mirL    | 19  | 4     |
| -----CCGATTTCTCCTGGTGTTTCAG-----                                                                         | mirL    | 21  | 1     |
| -----CCGATTTCTCCTGGTGTTTCAGAGTC-----                                                                     | mirL    | 25  | 1     |
| -----CTGACCGATTTCTCCTGGTGTTTC-----                                                                       | mirL    | 23  | 1     |
| -----TTCAGAGTCTGTTTTTGT-----                                                                             | loop    | 18  | 2     |
| -----CAGAGTCTGTTTTTGTCT-----                                                                             | loop    | 18  | 1     |

```

-----TAGCACCATTTGAAATCGGTTA----- mirR 22 78063
-----TAGCACCATTTGAAATCGGTT----- mirR 21 17350
-----AGCACCATTTGAAATCGGTTA----- mirR 21 5960
-----TAGCACCATTTGAAATCGGTTAT----- mirR 23 4655
-----TAGCACCATTTGAAATCGGT----- mirR 20 1594
-----AGCACCATTTGAAATCGGTT----- mirR 20 1436
-----TAGCACCATTTGAAATCGGTTATG----- mirR 24 483
-----AGCACCATTTGAAATCGGTTAT----- mirR 22 450
-----TAGCACCATTTGAAATCG----- mirR 18 287
-----CTAGCACCATTTGAAATCGGTTA----- mirR 23 267
-----TAGCACCATTTGAAATCGG----- mirR 19 262
-----GCACCATTTGAAATCGGTTA----- mirR 20 162
-----CTAGCACCATTTGAAATCGGTT----- mirR 22 121
-----GCACCATTTGAAATCGGTTATG----- mirR 22 85
-----AGCACCATTTGAAATCGGT----- mirR 19 71
-----GCACCATTTGAAATCGGTT----- mirR 19 34
-----AGCACCATTTGAAATCGGTTATG----- mirR 23 32
-----GCACCATTTGAAATCGGTTAT----- mirR 21 21
-----AGCACCATTTGAAATCGG----- mirR 18 18
-----CACCATTTGAAATCGGTTA----- mirR 19 16
-----CTAGCACCATTTGAAATCGGT----- mirR 21 15
-----GCACCATTTGAAATCGGT----- mirR 18 14
-----TCTAGCACCATTTGAAATCGGTTA----- mirR 24 12
-----GCACCATTTGAAATCGGTTATGA----- mirR 23 7
-----CTAGCACCATTTGAAATCGGTTAT----- mirR 24 4
-----CACCATTTGAAATCGGTTATGA----- mirR 22 2
-----CACCATTTGAAATCGGTT----- mirR 18 2
-----CTAGCACCATTTGAAATCG----- mirR 19 2
-----AGCACCATTTGAAATCGGTTATGA----- mirR 24 1
-----GCACCATTTGAAATCGGTTATGAT----- mirR 24 1
-----CACCATTTGAAATCGGTTATG----- mirR 21 1
-----TCTAGCACCATTTGAAATCGGTT----- mirR 23 1
-----ATGTAGGGGGAAGAGCAC-- morR 18 10
-----ATGTAGGGGGAAGAGCACCA morR 20 2
-----TGTAGGGGGAAGAGCACCA morR 19 1
-----TTATGATGTAGGGGGAAG----- morR 18 1
-----ATGATGTAGGGGGAAGAG---- morR 18 1
-----ATGATGTAGGGGGAAGAGC---- morR 19 1

```

>mmu-mir-378

```

CAGCCAGGGGGTGACAGAGCCACCCAGGGCTCCTGACTCCAGGTCCTGTGTGTACCTCGAAATAGCACTGGACTTGGAGTCAGAAGGCCTGAGTGGAGTCACCTTCCCCGC species len reads
CAGCCAGGGGGTGACAGAGCCACCCAGGG----- morL 29 3
-----GTGACAGAGCCACCCAGGG----- morL 19 3
---CCAGGGGGTGACAGAGCCACCCAGGG----- morL 26 2
-----TGACAGAGCCACCCAGGGC----- morL 19 2
-----GTGACAGAGCCACCCAGG----- morL 18 1

```

```

-----GGGGGTGACAGAGCCACCCA----- morL 20 1
-----TGACAGAGCCACCCAGGG----- morL 18 1
-----GACAGAGCCACCCAGGGCT----- morL 19 1
-----GGGTGACAGAGCCACCCA----- morL 18 1
-----CTCCTGACTCCAGGTCCTGTGT----- mirL 22 20352
-----CTCCTGACTCCAGGTCCTGTG----- mirL 21 918
-----TCCTGACTCCAGGTCCTGTGT----- mirL 21 671
-----CTCCTGACTCCAGGTCCTGTGTGT----- mirL 24 276
-----CTCCTGACTCCAGGTCCTGTGTG----- mirL 23 210
-----CTCCTGACTCCAGGTCCTGT----- mirL 20 171
-----TCCTGACTCCAGGTCCTGTGTGT----- mirL 23 53
-----CCTGACTCCAGGTCCTGTGT----- mirL 20 48
-----CTCCTGACTCCAGGTCCTG----- mirL 19 36
-----GCTCCTGACTCCAGGTCCTGTGT----- mirL 23 35
-----TCCTGACTCCAGGTCCTGTGTGTT----- mirL 24 32
-----TCCTGACTCCAGGTCCTGTG----- mirL 20 19
-----GCTCCTGACTCCAGGTCCTGTG----- mirL 22 17
-----CTCCTGACTCCAGGTCCTGTGTGTT----- mirL 25 15
-----TCCTGACTCCAGGTCCTGTGTG----- mirL 22 14
-----CCTGACTCCAGGTCCTGTGTGT----- mirL 22 13
-----GCTCCTGACTCCAGGTCCTGT----- mirL 21 12
-----TCCTGACTCCAGGTCCTGTGTGTTA----- mirL 25 11
-----CCTGACTCCAGGTCCTGTGTGTTA----- mirL 24 9
-----CCTGACTCCAGGTCCTGTGTGTT----- mirL 23 8
-----TCCTGACTCCAGGTCCTGT----- mirL 19 4
-----CCTGACTCCAGGTCCTGT----- mirL 18 3
-----CTGACTCCAGGTCCTGTGT----- mirL 19 2
-----CTGACTCCAGGTCCTGTGTGTT----- mirL 22 1
-----GCTCCTGACTCCAGGTCC----- mirL 18 1
-----CCTGACTCCAGGTCCTGTGTGTACC----- mirL 26 1
-----CCTGACTCCAGGTCCTGTG----- mirL 19 1
-----TGTTACCTCGAAATAGCA----- loop 18 1
-----TTACCTCGAAATAGCACT----- loop 18 1
-----GTTACCTCGAAATAGCAC----- loop 18 1
-----GTGTTACCTCGAAATAGC----- loop 18 1
-----ACTGGACTTGGAGTCAGAAGGC----- mirR 22 50242
-----ACTGGACTTGGAGTCAGAAGG----- mirR 21 18521
-----ACTGGACTTGGAGTCAGAAGGCC----- mirR 23 11740
-----ACTGGACTTGGAGTCAGAAGGCCT----- mirR 24 4179
-----ACTGGACTTGGAGTCAGAAG----- mirR 20 2828
-----CTGGACTTGGAGTCAGAAGGC----- mirR 21 2178
-----ACTGGACTTGGAGTCAGAAGGCCTG----- mirR 25 1452
-----CTGGACTTGGAGTCAGAAGG----- mirR 20 890
-----CTGGACTTGGAGTCAGAAGGCC----- mirR 22 775
-----ACTGGACTTGGAGTCAGAA----- mirR 19 748
-----CTGGACTTGGAGTCAGAAGGCCT----- mirR 23 322

```



```

-----CTGGACTTGGAGTCAGAAGGCCTG----- mirR 24 109
-----CACTGGACTTGGAGTCAGAAGG----- mirR 22 98
-----CTGGACTTGGAGTCAGAAG----- mirR 19 88
-----CACTGGACTTGGAGTCAGAAGGC----- mirR 23 88
-----GGACTTGGAGTCAGAAGGC----- mirR 19 51
-----GCACTGGACTTGGAGTCAGAAG----- mirR 22 27
-----CTGGACTTGGAGTCAGAA----- mirR 18 26
-----CACTGGACTTGGAGTCAGAAGGCCT----- mirR 25 19
-----GCACTGGACTTGGAGTCAGAA----- mirR 21 19
-----CACTGGACTTGGAGTCAGAAGGCC----- mirR 24 17
-----GCACTGGACTTGGAGTCAGAAGG----- mirR 23 15
-----TGGACTTGGAGTCAGAAGGC----- mirR 20 13
-----CACTGGACTTGGAGTCAGAAG----- mirR 21 12
-----TGGACTTGGAGTCAGAAG----- mirR 18 10
-----TGGACTTGGAGTCAGAAGGCC----- mirR 21 10
-----TGGACTTGGAGTCAGAAGGCCT----- mirR 22 7
-----GGACTTGGAGTCAGAAGG----- mirR 18 7
-----GGACTTGGAGTCAGAAGGCCT----- mirR 21 4
-----GCACTGGACTTGGAGTCAGA----- mirR 20 3
-----TGGACTTGGAGTCAGAAGGCCTG----- mirR 23 3
-----GGACTTGGAGTCAGAAGGCC----- mirR 20 3
-----AGCACTGGACTTGGAGTCAGAAGGC----- mirR 25 3
-----CACTGGACTTGGAGTCAGAA----- mirR 20 3
-----CACTGGACTTGGAGTCAGAAGGCCTG----- mirR 26 3
-----TGGACTTGGAGTCAGAAGG----- mirR 19 1
-----GGACTTGGAGTCAGAAGGCCTG----- mirR 22 1
-----GCACTGGACTTGGAGTCAGAAGGC----- mirR 24 1
-----AGCACTGGACTTGGAGTCAGAA----- mirR 22 1
-----TGGACTTGGAGTCAGAAGGCCTGA----- mirR 24 1
-----GCCTGAGTGGAGTCACCT----- morR 18 10
-----CCTGAGTGGAGTCACCTTCCCC-- morR 22 2
-----CCTGAGTGGAGTCACCTTC----- morR 19 2
-----TGAGTGGAGTCACCTTCCC--- morR 19 1
-----AGTGGAGTCACCTTCCCC-- morR 18 1
-----CTGAGTGGAGTCACCTTC----- morR 18 1
-----TGAGTGGAGTCACCTTCCCC-- morR 20 1
-----CTGAGTGGAGTCACCTTCCCCG- morR 22 1
-----CTGAGTGGAGTCACCTTCCCCGC morR 23 1
-----GGCCTGAGTGGAGTCACC----- morR 18 1

```

>mmu-mir-26b

```

CTTTCCCTCTTACCCCTACTGCCCGGGACCCAGTTCAAGTAATTCAGGATAGGTTGTGGTGCTGACCAGCCTGTTCTCCATTACTTGGCTCGGGGGCCGGTGCCCTGCAGCCTTGGGGTGAGAGGG species len
-----CCCTACTGCCCGGGACCCAG----- morL 20 86
-----CCTACTGCCCGGGACCCAG----- morL 19 21
-----ACCCCTACTGCCCGGGACCCAG----- morL 22 6
-----TACCCCTACTGCCCGGGACCCAG----- morL 23 6

```

```

-----CCTACTGCCCGGGACCCAGT----- morL 20 5
-----CCCCTACTGCCCGGGACCCAG----- morL 21 5
-----CCCTACTGCCCGGGACCCAGT----- morL 21 4
-----CCCTACTGCCCGGGACCCA----- morL 19 3
-----ACCCCTACTGCCCGGGACC----- morL 19 3
-----CCTACTGCCCGGGACCCA----- morL 18 3
-----CTACTGCCCGGGACCCAG----- morL 18 2
---TCCCCCTTTACCCTACTGCCCGGGACCCA----- morL 30 1
-----CTACTGCCCGGGACCCAGT----- morL 19 1
--TTCCCCCTTTACCCTACTGCCCGGGACCCAG----- morL 32 1
---TCCCCCTTTACCCTACTGCCCGGGACCC----- morL 29 1
CTTTCCCCCTTTACCCTACTGCCCGGGACCC----- morL 32 1
-----TTCAAGTAATTCAGGATAGGTT----- mirL 22 65415
-----TTCAAGTAATTCAGGATAGGT----- mirL 21 19489
-----TTCAAGTAATTCAGGATAGGTTG----- mirL 23 13819
-----TTCAAGTAATTCAGGATAGGTTGT----- mirL 24 2452
-----TCAAGTAATTCAGGATAGGTT----- mirL 21 1804
-----TTCAAGTAATTCAGGATAGG----- mirL 20 1725
-----TCAAGTAATTCAGGATAGGTTG----- mirL 22 895
-----TCAAGTAATTCAGGATAGGT----- mirL 20 743
-----TTCAAGTAATTCAGGATAG----- mirL 19 741
-----TTCAAGTAATTCAGGATAGGTTGTG----- mirL 25 277
-----TCAAGTAATTCAGGATAGGTTGT----- mirL 23 177
-----TCAAGTAATTCAGGATAGG----- mirL 19 167
-----CAAGTAATTCAGGATAGGTT----- mirL 20 73
-----TCAAGTAATTCAGGATAG----- mirL 18 67
-----AAGTAATTCAGGATAGGTT----- mirL 19 29
-----GTTCAAGTAATTCAGGATAGGTT----- mirL 23 27
-----TCAAGTAATTCAGGATAGGTTGTG----- mirL 24 25
-----GTTCAAGTAATTCAGGATAGGT----- mirL 22 19
-----CAAGTAATTCAGGATAGGTTG----- mirL 21 15
-----GTTCAAGTAATTCAGGATAGGTTG----- mirL 24 7
-----AAGTAATTCAGGATAGGTTGTG----- mirL 22 6
-----AGTTCAAGTAATTCAGGATAGGTT----- mirL 24 5
-----CAAGTAATTCAGGATAGG----- mirL 18 5
-----AGTTCAAGTAATTCAGGATAGGTTG----- mirL 25 3
-----CAAGTAATTCAGGATAGGT----- mirL 19 3
-----CAAGTAATTCAGGATAGGTTGT----- mirL 22 2
-----AAGTAATTCAGGATAGGTTGT----- mirL 21 2
-----AAGTAATTCAGGATAGGTTG----- mirL 20 1
-----AAGTAATTCAGGATAGGT----- mirL 18 1
-----GTTCAAGTAATTCAGGATAGGTTGTG----- mirL 26 1
-----TGTTGGTGCTGACCAGCCT----- loop 18 1
-----TTGTTGGTGCTGACCAGCCT----- loop 19 1
-----CCTGTTCTCCATTACTTGGCTC----- mirR 22 4653
-----CCTGTTCTCCATTACTTGGCT----- mirR 21 694

```

```

-----CCTGTTCTCCATTACTTGGCTCG----- mirR 23 358
-----CCTGTTCTCCATTACTTGGC----- mirR 20 132
-----CCTGTTCTCCATTACTTGGCTCGG----- mirR 24 71
-----CCTGTTCTCCATTACTTGG----- mirR 19 62
-----CCTGTTCTCCATTACTTGGCTCGGG----- mirR 25 40
-----GCCTGTTCTCCATTACTTGGCTC----- mirR 23 20
-----GCCTGTTCTCCATTACTTGGCT----- mirR 22 12
-----GTTCTCCATTACTTGGCTC----- mirR 19 12
-----TGTTCTCCATTACTTGGCTCGG----- mirR 22 11
-----CTGTTCTCCATTACTTGGCTC----- mirR 21 9
-----GCCTGTTCTCCATTACTTGGCTCG----- mirR 24 9
-----GTTCTCCATTACTTGGCT----- mirR 18 5
-----CTGTTCTCCATTACTTGGCT----- mirR 20 4
-----GCCTGTTCTCCATTACTTGGC----- mirR 21 3
-----GCCTGTTCTCCATTACTT----- mirR 18 2
-----TGTTCTCCATTACTTGGC----- mirR 18 2
-----TGTTCTCCATTACTTGGCTC----- mirR 20 1
-----AGCCTGTTCTCCATTACTTGGCT----- mirR 23 1
-----CAGCCTGTTCTCCATTACT----- mirR 19 1
-----GGGGGCCGGTGCCCTGCAGCC----- morR 21 10
-----TCGGGGGCCGGTGCCCTG----- morR 18 2
-----GGGGGCCGGTGCCCTGCA----- morR 18 1
-----GGGGGCCGGTGCCCTGCAGCCTT----- morR 23 1
-----GGGGGCCGGTGCCCTGCAGCCTTGGGGTGAGAGGG morR 35 1
-----CGGGGGCCGGTGCCCTGC----- morR 18 1
-----GGCCGGTGCCCTGCAGCC----- morR 18 1
-----CTCGGGGGCCGGTGCCCTG----- morR 19 1
-----CTCGGGGGCCGGTGCCCT----- morR 18 1
-----GGGCCGGTGCCCTGCAGC----- morR 18 1
-----CGGGGGCCGGTGCCCTGCA----- morR 19 1

```

>mmu-mir-495

```

GCAAGAGCTCAGCCGTGGTACCTGAAAAGAAGTTGCCCATGTTATTTTTCGCTTTTATTGTGACGAAACAAACATGGTGCACCTTCTTTTTCGATATCAAATCTCACCTTGAGAGCTCCCC species len read
-----AGCCGTGGTACCTGAAAA----- morL 18 15
GCAAGAGCTCAGCCGTGGTACCTGAA----- morL 26 4
-----TCAGCCGTGGTACCTGAAAA----- morL 20 2
-----CAGCCGTGGTACCTGAAA----- morL 18 2
-----CTCAGCCGTGGTACCTGAAAA----- morL 21 1
-----GAGCTCAGCCGTGGTACCTGAAA----- morL 24 1
-----TCAGCCGTGGTACCTGAAA----- morL 19 1
-----GAGCTCAGCCGTGGTACCTGAAAAGA----- morL 26 1
-----TCAGCCGTGGTACCTGAAAAG----- morL 21 1
-----GAAGTTGCCCATGTTATTTTTCG----- mirL 23 433
-----GAAGTTGCCCATGTTATTTTT----- mirL 21 77
-----GAAGTTGCCCATGTTATTTTTC----- mirL 22 64
-----GAAGTTGCCCATGTTATTTTTCGC----- mirL 24 35

```

```

-----GAAGTTGCCCATGTTATTTTTTCGCT----- mirL 25 15
-----GAAGTTGCCCATGTTATTTTTTCGCTTT----- mirL 27 2
-----AAGTTGCCCATGTTATTTTT----- mirL 20 2
-----AAGTTGCCCATGTTATTTTT----- mirL 19 1
-----AAGTTGCCCATGTTATTTTTTCG----- mirL 22 1
-----GAAGTTGCCCATGTTATTTTTTCGCTT----- mirL 26 1
-----AAGTTGCCCATGTTATTT----- mirL 18 1
-----AAACAAACATGGTGCACCTTCTT----- mirR 22 60790
-----AAACAAACATGGTGCACCTTCTTT----- mirR 23 19681
-----AACAAACATGGTGCACCTTCTTT----- mirR 22 7702
-----AAACAAACATGGTGCACCTTCT----- mirR 21 6218
-----AACAAACATGGTGCACCTTCTT----- mirR 21 3621
-----AAACAAACATGGTGCACCTTCTTTT----- mirR 24 3442
-----AAACAAACATGGTGCACCTTC----- mirR 20 2827
-----AAACAAACATGGTGCACCTT----- mirR 19 1821
-----AACAAACATGGTGCACCTTCTTTT----- mirR 23 1717
-----ACAAACATGGTGCACCTTCTTTT----- mirR 22 1134
-----AAACAAACATGGTGCACCTTCTTTT----- mirR 25 924
-----ACAAACATGGTGCACCTTCTTT----- mirR 21 639
-----AACAAACATGGTGCACCTTC----- mirR 19 514
-----AACAAACATGGTGCACCTTCT----- mirR 20 508
-----AACAAACATGGTGCACCTTCTTTT----- mirR 24 324
-----ACAAACATGGTGCACCTTCTT----- mirR 20 271
-----ACAAACATGGTGCACCTTCTTTT----- mirR 23 247
-----AACAAACATGGTGCACCTT----- mirR 18 176
-----ACAAACATGGTGCACCTTCT----- mirR 19 72
-----GAAACAAACATGGTGCACCTTCTT----- mirR 23 71
-----CAAACATGGTGCACCTTCTTTT----- mirR 21 51
-----ACAAACATGGTGCACCTTC----- mirR 18 44
-----CAAACATGGTGCACCTTCTT----- mirR 19 37
-----CAAACATGGTGCACCTTCTTTT----- mirR 22 28
-----CAAACATGGTGCACCTTCTTT----- mirR 20 24
-----ACGAAACAAACATGGTGCACCTTC----- mirR 23 17
-----CAAACATGGTGCACCTTCT----- mirR 18 9
-----GAAACAAACATGGTGCACCTTCTTT----- mirR 24 3
-----CGAAACAAACATGGTGCACCTTCTT----- mirR 24 3
-----CGAAACAAACATGGTGCACCTTCT----- mirR 23 2
-----GAAACAAACATGGTGCACCTTCT----- mirR 22 2
-----GAAACAAACATGGTGCACCTT----- mirR 20 1
-----CGAAACAAACATGGTGCAC----- mirR 19 1
-----GAAACAAACATGGTGCACCTTC----- mirR 21 1
-----GAAACAAACATGGTGCAC----- mirR 18 1
-----CGAAACAAACATGGTGCA----- mirR 18 1
-----TTTCGATATCAAATCTCACC----- morR 20 16
-----TTTCGATATCAAATCTCACCTTGGAGAGCTCCCC morR 34 6
-----TTTCGATATCAAATCTCACCTT----- morR 22 2

```

```

-----CGATATCAAATCTCACCT----- morR 18 1
-----TCGATATCAAATCTCACC----- morR 18 1
-----TTTCGATATCAAATCTCACCT----- morR 21 1
-----TTCGATATCAAATCTCACC----- morR 19 1

```

>mmu-mir-185

| Species | len | reads |
|---------|-----|-------|
| morL    | 21  | 15    |
| morL    | 18  | 3     |
| morL    | 18  | 2     |
| morL    | 18  | 1     |
| morL    | 22  | 1     |
| morL    | 20  | 1     |
| morL    | 19  | 1     |
| morL    | 19  | 1     |
| mirL    | 22  | 86146 |
| mirL    | 23  | 15177 |
| mirL    | 24  | 4157  |
| mirL    | 21  | 2359  |
| mirL    | 21  | 1066  |
| mirL    | 18  | 906   |
| mirL    | 25  | 613   |
| mirL    | 20  | 345   |
| mirL    | 22  | 201   |
| mirL    | 23  | 47    |
| mirL    | 23  | 37    |
| mirL    | 20  | 32    |
| mirL    | 20  | 18    |
| mirL    | 22  | 12    |
| mirL    | 19  | 9     |
| mirL    | 18  | 6     |
| mirL    | 19  | 6     |
| mirL    | 18  | 4     |
| mirL    | 24  | 3     |
| mirL    | 19  | 2     |
| mirL    | 19  | 2     |
| mirL    | 24  | 1     |
| mirL    | 18  | 1     |
| mirL    | 24  | 1     |
| mirL    | 22  | 1     |
| mirR    | 22  | 356   |
| mirR    | 21  | 170   |
| mirR    | 20  | 26    |
| mirR    | 23  | 20    |
| mirR    | 20  | 10    |
| mirR    | 19  | 9     |

```

-----CAGGGGCTGGCTTTCCTCTGGT----- mirR 22 6
-----CAGGGGCTGGCTTTCCTCTGGTCC----- mirR 24 6
-----AGGGGCTGGCTTTCCTCTGGTCC----- mirR 24 4
-----GGGGCTGGCTTTCCTCTGGTC----- mirR 21 4
-----CAGGGGCTGGCTTTCCTCTGGTC----- mirR 23 3
-----GGGGCTGGCTTTCCTCTG----- mirR 18 2
-----CAGGGGCTGGCTTTCCTCTGGTCC----- mirR 25 1
-----GGGGCTGGCTTTCCTCTGG----- mirR 19 1
-----GGGGCTGGCTTTCCTCTGGT----- mirR 20 1
-----AGGGGCTGGCTTTCCTCTGGTCC----- mirR 25 1
-----CCAGGGGCTGGCTTTCCTCT----- mirR 20 1
-----AGGGGCTGGCTTTCCTCTG----- mirR 19 1
-----CCTTCTCTCCCAATGACTGCGT----- morR 22 2
-----CCTTCTCTCCCAATGACTGCGTCTCATCGATGC morR 34 1
-----CCTTCTCTCCCAATGACTGCGTCTT----- morR 25 1
-----CCTTCTCTCCCAATGACTG----- morR 19 1
-----TCCTTCTCTCCCAATGAC----- morR 18 1
-----CTTCTCTCCCAATGACTG----- morR 18 1
-----CCTTCTCTCCCAATGACTGCG----- morR 21 1

```

>mmu-mir-708

```

AGGGACAGCTGTGTTTGAATGGGGACTGCCCTCAAGGAGCTTACAATCTAGCTGGGGGTAGATGACTTGCACCTGAACACAAGTACTGTGAGCTTCTAGAGGGCAGGGGCCCTTACCCTAGTCATCTCTCTGCTC spe
-----GTTTGAATGGGGACTGCCCTC----- mor
-----TTGAATGGGGACTGCCCTC----- mor
-----TGTTTGAATGGGGACTGCCCTC----- mor
-----TGAAATGGGGACTGCCCT----- mor
-----GAAATGGGGACTGCCCTC----- mor
-----TGAAATGGGGACTGCCCTC----- mor
-----TTTGAATGGGGACTGCC----- mor
-----TTGAATGGGGACTGCCCTCA----- mor
-----TTTGAATGGGGACTGCCCTC----- mor
-----GTTTGAATGGGGACTGCCCT----- mor
AGGGACAGCTGTGTTTGAATGGGGACTGCC----- mor
-----AAGGAGCTTACAATCTAGCTGGG----- mir
-----AAGGAGCTTACAATCTAGCTGG----- mir
-----AAGGAGCTTACAATCTAGCTGGGG----- mir
-----AAGGAGCTTACAATCTAGCTGGGGG----- mir
-----AAGGAGCTTACAATCTAGCTGGGGGT----- mir
-----AGGAGCTTACAATCTAGCTGGG----- mir
-----AAGGAGCTTACAATCTAGCTG----- mir
-----AGGAGCTTACAATCTAGCTGGGG----- mir
-----AGGAGCTTACAATCTAGCTGG----- mir
-----AAGGAGCTTACAATCTAGCT----- mir
-----AGGAGCTTACAATCTAGCTGGGG----- mir
-----GGAGCTTACAATCTAGCTGGG----- mir
-----AGGAGCTTACAATCTAGCTGGGGGT----- mir

```

```
-----GGAGCTTACAATCTAGCTGG----- mir
-----GAGCTTACAATCTAGCTGGG----- mir
-----GGAGCTTACAATCTAGCTGGG----- mir
-----GAGCTTACAATCTAGCTGG----- mir
-----AGGAGCTTACAATCTAGCTG----- mir
-----CAAGGAGCTTACAATCTAGCTGG----- mir
-----CAAGGAGCTTACAATCTAGCTGG----- mir
-----GGAGCTTACAATCTAGCTG----- mir
-----GGAGCTTACAATCTAGCTGGGG----- mir
-----CAAGGAGCTTACAATCTAGCTGGGG----- mir
-----GAGCTTACAATCTAGCTGGGG----- mir
-----GGAGCTTACAATCTAGCTGGGGGT----- mir
-----CAAGGAGCTTACAATCTAGCTG----- mir
-----AGGAGCTTACAATCTAGCTGGGGGTA----- mir
-----TCAAGGAGCTTACAATCTAGCTGGG----- mir
-----CTCAAGGAGCTTACAATC----- mir
-----GAGCTTACAATCTAGCTGGGGGT----- mir
-----GAGCTTACAATCTAGCTGGGG----- mir
-----TCAAGGAGCTTACAATCTAGC----- mir
-----CAAGGAGCTTACAATCTAGCTGGGGGT----- mir
-----GGTAGATGACTTGCACTTGAACA----- loo
-----GGTAGATGACTTGCACTTGAACAC----- loo
-----GGTAGATGACTTGCACTTGAAC----- loo
-----GGGTAGATGACTTGCACTTGAACA----- loo
-----GGTAGATGACTTGCACTTGAAC----- loo
-----GGGGTAGATGACTTGCACTTGAACACA----- loo
-----GGGTAGATGACTTGCACTTGAACAC----- loo
-----GGTAGATGACTTGCACTTGAACACA----- loo
-----GGTAGATGACTTGCACTTGA----- loo
-----GGGGTAGATGACTTGCACTTGAACAC----- loo
-----GTAGATGACTTGCACTTGA----- loo
-----CAACTAGACTGTGAGCTTCTA----- mir
-----CAACTAGACTGTGAGCTTCTAGA----- mir
-----CAACTAGACTGTGAGCTTCTAG----- mir
-----CAACTAGACTGTGAGCTTCT----- mir
-----AACTAGACTGTGAGCTTCTAGA----- mir
-----CAACTAGACTGTGAGCTTCT----- mir
-----CAACTAGACTGTGAGCTTCTA----- mir
-----AACTAGACTGTGAGCTTCTAGA----- mir
-----AACTAGACTGTGAGCTTCT----- mir
-----CAACTAGACTGTGAGCTTCTAGAG----- mir
-----AACTAGACTGTGAGCTTCTAGAG----- mir
-----AACTAGACTGTGAGCTTCTAGAG----- mir
-----AACTAGACTGTGAGCTTCTAG----- mir
-----AACTAGACTGTGAGCTTCT----- mir
```

```

-----ACACAAGTACTGTGAGCTTC----- mir
-----CTAGACTGTGAGCTTCTA----- mir
-----ACACAAGTACTGTGAGCTTCTAGAG----- mir
-----ACTAGACTGTGAGCTTCTA----- mir
-----ACTAGACTGTGAGCTTCTAG----- mir
-----CTAGACTGTGAGCTTCTAG----- mir
-----AACTAGACTGTGAGCTTC----- mir
-----ACACAAGTACTGTGAGCTT----- mir
-----ACACAAGTACTGTGAG----- mir
-----AACTAGACTGTGAGCTTCTAGAGGGC----- mir
-----ACAAGTACTGTGAGCTTC----- mir
-----CACAAGTACTGTGAGCTTCTAGA----- mir
-----CACAAGTACTGTGAGCTTCT----- mir
-----GGGCAGGGGCCTTACCCTAGTCATCTCTCTGCTC mor
-----GGGCAGGGGCCTTACCCTAGTCATCTC----- mor
-----GGGCAGGGGCCTTACCCTAGTCA----- mor
-----GGGCAGGGGCCTTACCCT----- mor
-----AGGGCAGGGGCCTTACCCT----- mor
-----GGCAGGGGCCTTACCCTAGTC----- mor
-----AGGGCAGGGGCCTTACCCT----- mor
-----GGGCAGGGGCCTTACCCTAGTCATCTCT----- mor

```

>mmu-mir-302b

```

TTAACTAGTTGCCTTGTGGGTGGGTCCCTTCAACTTAAACATGGGAATGCTTTCTGTCTCATCGAAGAGTAAGTGCTTCCATGTTTTAGTAGAAGTGAATTCAAGAAACTCTGGAATAAGAAAGC species len
-----TTGTGGGTGGGTCCCTTCA----- morL 20 47
-----TGTTGGGTGGGTCCCTTCA----- morL 19 21
-----CTTGTGGGTGGGTCCCTTCA----- morL 21 13
-----GTGGGTGGGTCCCTTCA----- morL 18 12
-----CCTTGTGGGTGGGTCCCTTCA----- morL 22 4
-----GTTGCCTTGTGGGTGGGTCCCTTCA----- morL 26 3
-----TGCTTGTGGGTGGGTCCCTTCA----- morL 24 3
-----TTGTGGGTGGGTCCCTTCAA----- morL 21 1
TTAACTAGTTGCCTTGTGGGTGGGTCCCTTCA----- morL 32 1
-----GTGGGTGGGTCCCTTCAA----- morL 19 1
-----TTGTGGGTGGGTCCCTTCA----- morL 19 1
-----GCCTTGTGGGTGGGTCCCTT----- morL 21 1
-----ACTTTAACATGGGAATGCTTTCT----- mirL 23 1957
-----ACTTTAACATGGGAATGCTTTCT----- mirL 22 720
-----ACTTTAACATGGGAATGCTTT----- mirL 21 190
-----ACTTTAACATGGGAATGCTT----- mirL 20 105
-----ACTTTAACATGGGAATGCTTTCTG----- mirL 24 77
-----ACTTTAACATGGGAATGCT----- mirL 18 29
-----ACTTTAACATGGGAATGCT----- mirL 19 17
-----TTAACATGGGAATGCTTTCT----- mirL 20 7
-----CTTTAACATGGGAATGCTTTCT----- mirL 22 4
-----CTTTAACATGGGAATGCTTT----- mirL 20 4

```



```

-----TTTAACATGGGAATGCTTTCT----- mirL 21 2
-----TTAACATGGGAATGCTTTCTG----- mirL 21 1
-----CTTTAACATGGGAATGCTTTC----- mirL 21 1
-----TCAACTTTAACATGGGAA----- mirL 18 1
-----TCAACTTTAACATGGGAAT----- mirL 19 1
-----TTTAACATGGGAATGCTTTC----- mirL 20 1
-----AACTTTAACATGGGAATGCTTT----- mirL 22 1
-----CTTTAACATGGGAATGCT----- mirL 18 1
-----CTTTAACATGGGAATGCTT----- mirL 19 1
-----TCTGTCTCATCGAAGAGTAA----- loop 20 8
-----TAAGTGCTTCCATGTTTTAGTAG----- mirR 23 37293
-----AAGTGCTTCCATGTTTTAGTAGA----- mirR 23 18205
-----AAGTGCTTCCATGTTTTAGTAG----- mirR 22 17416
-----TAAGTGCTTCCATGTTTTAGT----- mirR 21 13726
-----TAAGTGCTTCCATGTTTTAGTAGA----- mirR 24 11713
-----TAAGTGCTTCCATGTTTTAGTA----- mirR 22 3097
-----AAGTGCTTCCATGTTTTAGTAGAA----- mirR 24 1448
-----AAGTGCTTCCATGTTTTAGTA----- mirR 21 913
-----TAAGTGCTTCCATGTTTTAGTAGAA----- mirR 25 673
-----AAGTGCTTCCATGTTTTAGT----- mirR 20 602
-----AGTGCTTCCATGTTTTAGTAGA----- mirR 22 330
-----AGTGCTTCCATGTTTTAGTAG----- mirR 21 317
-----GTGCTTCCATGTTTTAGTAGA----- mirR 21 244
-----TAAGTGCTTCCATGTTTTAG----- mirR 20 148
-----GTGCTTCCATGTTTTAGTAG----- mirR 20 129
-----GTGCTTCCATGTTTTAGTAGAA----- mirR 22 103
-----TAAGTGCTTCCATGTTTTA----- mirR 19 54
-----AAGTGCTTCCATGTTTTAG----- mirR 19 51
-----AAGTGCTTCCATGTTTTAGTAGAAG----- mirR 25 50
-----AGTGCTTCCATGTTTTAGTAGAA----- mirR 23 27
-----AGTGCTTCCATGTTTTAGTA----- mirR 20 26
-----GTAAGTGCTTCCATGTTTTAGTAGA----- mirR 25 18
-----AGTGCTTCCATGTTTTAGT----- mirR 19 17
-----GTGCTTCCATGTTTTAGTA----- mirR 19 13
-----GTAAGTGCTTCCATGTTTTAGTAG----- mirR 24 13
-----GTAAGTGCTTCCATGTTTTAGT----- mirR 22 10
-----GTAAGTGCTTCCATGTTTTAGTA----- mirR 23 6
-----GAGTAAGTGCTTCCATGTTTTAGT----- mirR 24 6
-----GTGCTTCCATGTTTTAGTAGAAG----- mirR 23 4
-----GTGCTTCCATGTTTTAGT----- mirR 18 4
-----AGTGCTTCCATGTTTTAG----- mirR 18 3
-----GTAAGTGCTTCCATGTTTTA----- mirR 20 3
-----GTAAGTGCTTCCATGTTTTAGTAGAA----- mirR 26 1
-----AGTAAGTGCTTCCATGTTTTA----- mirR 21 1
-----AGTGCTTCCATGTTTTAGTAGAAG----- mirR 24 1
-----AAGTGAATTCAAGAAACTCTGGAATAAGAAAGC morR 33 4

```

```

-----AAGTGAATTCAAGAAACTCTGG----- morR 22 2
-----AAGTGAATTCAAGAAACTCTGGA----- morR 23 1
-----AGAAGTGAATTCAAGAAAC----- morR 19 1

>mmu-mir-423
TGTGAGGAAATAAAGGAAGTTAGGCTGAGGGGCAGAGAGCGAGACTTTTCTATTTTCCAAAAGCTCGGTCTGAGGCCCTCAGTCTTGCTTCCTACCCCGCGCTTGAGTTTCTCCCGGT species len reads
TGTGAGGAAATAAAGGAAGTTAGGC----- morL 25 3
-----ATAAAGGAAGTTAGGCTG----- morL 18 1
-----GGAATAAAGGAAGTTAGGC----- morL 20 1
-----GGAATAAAGGAAGTTAG----- morL 18 1
-----TGAGGGGCAGAGAGCGAGACTTT----- mirL 23 6869
-----TGAGGGGCAGAGAGCGAGACTTT----- mirL 24 4764
-----TGAGGGGCAGAGAGCGAGACT----- mirL 22 2651
-----TGAGGGGCAGAGAGCGAGACTTTTC----- mirL 25 831
-----TGAGGGGCAGAGAGCGAGACT----- mirL 21 445
-----TGAGGGGCAGAGAGCGAGAC----- mirL 20 407
-----GAGGGGCAGAGAGCGAGACTTTT----- mirL 23 219
-----GAGGGGCAGAGAGCGAGACTTT----- mirL 22 219
-----TGAGGGGCAGAGAGCGAGA----- mirL 19 200
-----AGGGGCAGAGAGCGAGACTTTT----- mirL 22 107
-----GAGGGGCAGAGAGCGAGACT----- mirL 21 97
-----GAGGGGCAGAGAGCGAGACTTTTC----- mirL 24 60
-----GAGGGGCAGAGAGCGAGACT----- mirL 20 24
-----AGGGGCAGAGAGCGAGACTTTTC----- mirL 23 20
-----GAGGGGCAGAGAGCGAGA----- mirL 18 12
-----GAGGGGCAGAGAGCGAGAC----- mirL 19 12
-----AGGGGCAGAGAGCGAGACTTT----- mirL 21 9
-----AGGGGCAGAGAGCGAGACT----- mirL 20 8
-----CTGAGGGGCAGAGAGCGAGACTTT----- mirL 24 4
-----AGGGGCAGAGAGCGAGAC----- mirL 18 4
-----GGCTGAGGGGCAGAGAGC----- mirL 18 3
-----CTGAGGGGCAGAGAGCGAGACT----- mirL 23 2
-----GCTGAGGGGCAGAGAGCGA----- mirL 19 1
-----GGGCAGAGAGCGAGACT----- mirL 18 1
-----CTGAGGGGCAGAGAGCGAG----- mirL 19 1
-----AGCTCGGTCTGAGGCCCTCAGT----- mirR 23 42529
-----AGCTCGGTCTGAGGCCCTCAGTC----- mirR 24 9389
-----AGCTCGGTCTGAGGCCCTCAGTCT----- mirR 25 7283
-----AGCTCGGTCTGAGGCCCTCA----- mirR 21 6675
-----AGCTCGGTCTGAGGCCCTCAG----- mirR 22 6382
-----AAGCTCGGTCTGAGGCCCTCAGT----- mirR 24 5905
-----AAGCTCGGTCTGAGGCCCTCA----- mirR 22 2764
-----AAGCTCGGTCTGAGGCCCTCAG----- mirR 23 1864
-----AGCTCGGTCTGAGGCCCT----- mirR 19 1590
-----AAGCTCGGTCTGAGGCCCTCAGTC----- mirR 25 1456
-----AGCTCGGTCTGAGGCCCTC----- mirR 20 1369

```

```

-----AAGCTCGGTCTGAGGCCCTCAGTCT----- mirR 26 1156
-----AAGCTCGGTCTGAGGCCCTC----- mirR 21 663
-----AAGCTCGGTCTGAGGCCCT----- mirR 20 422
-----GCTCGGTCTGAGGCCCTCAGT----- mirR 22 210
-----AAAGCTCGGTCTGAGGCCCTCA----- mirR 23 98
-----GCTCGGTCTGAGGCCCTCAGTC----- mirR 23 87
-----AAAGCTCGGTCTGAGGCCCTCAG----- mirR 24 55
-----GCTCGGTCTGAGGCCCTCAGTCT----- mirR 24 22
-----AAAGCTCGGTCTGAGGCCCTC----- mirR 22 18
-----GCTCGGTCTGAGGCCCTCAG----- mirR 21 14
-----CTCGGTCTGAGGCCCTCAGT----- mirR 21 11
-----AAAGCTCGGTCTGAGGCCCTCAGT----- mirR 25 8
-----CTCGGTCTGAGGCCCTCAGTCT----- mirR 23 7
-----CTCGGTCTGAGGCCCTCAGTC----- mirR 22 6
-----GCTCGGTCTGAGGCCCTCA----- mirR 20 6
-----CTCGGTCTGAGGCCCTCAG----- mirR 20 6
-----TCGGTCTGAGGCCCTCAGT----- mirR 20 5
-----GCTCGGTCTGAGGCCCT----- mirR 18 4
-----AAAGCTCGGTCTGAGGCCCT----- mirR 21 4
-----GCTCGGTCTGAGGCCCTCAGTCTT----- mirR 25 2
-----TCGGTCTGAGGCCCTCAGTCT----- mirR 22 2
-----TCGGTCTGAGGCCCTCA----- mirR 18 1
-----AAAGCTCGGTCTGAGGCCCTCAGTC----- mirR 26 1
-----TCGGTCTGAGGCCCTCAGTCTT----- mirR 23 1
-----AAAAGCTCGGTCTGAGGC----- mirR 18 1
-----CTCGGTCTGAGGCCCTCAGTCTT----- mirR 24 1
-----AAAGCTCGGTCTGAGGCC----- mirR 18 1
-----CTCGGTCTGAGGCCCTCA----- mirR 19 1
-----CTTGCTTCCTACCCCGCGCTTGAGTTTCTCCCGT morR 35 7
-----CTTGCTTCCTACCCCGCGCTTGA----- morR 23 1

```

>mmu-mir-379

```

CGTTCCATGGTTCCTGAAGAGATGGTAGACTATGGAACGTAGGCGTTATGTTTTTGACCTATGTAACATGGTCCACTAACTCTCAGTATCCAATCCATCCTCGGAGGGCACCCC species len reads
-GTTCCATGGTTCCTGAAGAGA----- morL 21 52
--TCCATGGTTCCTGAAGAGA----- morL 20 44
---TCCATGGTTCCTGAAGAGA----- morL 19 7
CGTTCCATGGTTCCTGAAGAGA----- morL 22 6
--TCCATGGTTCCTGAAGAGAT----- morL 21 2
-GTTCCATGGTTCCTGAAGAGAT----- morL 22 2
-GTTCCATGGTTCCTGAAGA----- morL 19 2
--TCCATGGTTCCTGAAGA----- morL 18 1
---TCCATGGTTCCTGAAGAGAT----- morL 20 1
----CATGGTTCCTGAAGAGAT----- morL 18 1
-----TGGTAGACTATGGAACGTAGG----- mirL 21 60631
-----TGGTAGACTATGGAACGTAGGC----- mirL 22 20409
-----TGGTAGACTATGGAACGTAG----- mirL 20 5988

```

```

-----TGGTAGACTATGGAACGTAGGCG----- mirL 23 3130
-----TGGTAGACTATGGAACGTA----- mirL 19 1588
-----TGGTAGACTATGGAACGTAGGCGT----- mirL 24 1275
-----GGTAGACTATGGAACGTAGG----- mirL 20 975
-----GGTAGACTATGGAACGTAGGC----- mirL 21 657
-----ATGGTAGACTATGGAACGTAGG----- mirL 22 354
-----TGGTAGACTATGGAACGT----- mirL 18 350
-----GGTAGACTATGGAACGTAG----- mirL 19 153
-----GGTAGACTATGGAACGTAGGCG----- mirL 22 98
-----ATGGTAGACTATGGAACGTAG----- mirL 21 89
-----ATGGTAGACTATGGAACGTAGGC----- mirL 23 85
-----GGTAGACTATGGAACGTAGGCGT----- mirL 23 83
-----GGTAGACTATGGAACGTA----- mirL 18 60
-----GTAGACTATGGAACGTAGG----- mirL 19 20
-----GTAGACTATGGAACGTAGGCG----- mirL 21 15
-----TAGACTATGGAACGTAGG----- mirL 18 12
-----GTAGACTATGGAACGTAG----- mirL 18 11
-----GGTAGACTATGGAACGTAGGCGTT----- mirL 24 9
-----ATGGTAGACTATGGAACGTAGGCGT----- mirL 25 7
-----ATGGTAGACTATGGAACGTA----- mirL 20 7
-----TAGACTATGGAACGTAGGCGTT----- mirL 22 4
-----ATGGTAGACTATGGAACG----- mirL 18 3
-----ATGGTAGACTATGGAACGTAGGCG----- mirL 24 3
-----GATGGTAGACTATGGAACGTAGG----- mirL 23 2
-----TAGACTATGGAACGTAGGC----- mirL 19 1
-----GTAGACTATGGAACGTAGGC----- mirL 20 1
-----CGTTATGTTTTTGACCTA----- loop 18 22
-----GGCGTTATGTTTTTGACC----- loop 18 9
-----GGCGTTATGTTTTTGACCT----- loop 19 2
-----AGGCGTTATGTTTTTGACC----- loop 19 1
-----TATGTAACATGGTCCACTAACT----- mirR 22 3542
-----TATGTAACATGGTCCACTAAC----- mirR 21 2541
-----TATGTAACATGGTCCACTAA----- mirR 20 1846
-----TATGTAACATGGTCCACTA----- mirR 19 665
-----TATGTAACATGGTCCACTAACTC----- mirR 23 299
-----CTATGTAACATGGTCCACTAA----- mirR 21 270
-----ATGTAACATGGTCCACTAAC----- mirR 20 175
-----TATGTAACATGGTCCACT----- mirR 18 162
-----ATGTAACATGGTCCACTAACT----- mirR 21 150
-----ATGTAACATGGTCCACTAA----- mirR 19 137
-----TATGTAACATGGTCCACTAACTCT----- mirR 24 127
-----CTATGTAACATGGTCCACTA----- mirR 20 126
-----CTATGTAACATGGTCCACTAAC----- mirR 22 118
-----ATGTAACATGGTCCACTA----- mirR 18 117
-----CTATGTAACATGGTCCACTAACT----- mirR 23 47
-----CTATGTAACATGGTCCACT----- mirR 19 33

```

```

-----ATGTAACATGGTCCACTAACTC----- mirR 22 25
-----ATGTAACATGGTCCACTAACTCT----- mirR 23 18
-----TGTAACATGGTCCACTAAC----- mirR 19 15
-----CTATGTAACATGGTCCAC----- mirR 18 12
-----TGTAACATGGTCCACTAA----- mirR 18 9
-----TGTAACATGGTCCACTAACT----- mirR 20 8
-----GTAACATGGTCCACTAAC----- mirR 18 2
-----GTAACATGGTCCACTAACT----- mirR 19 2
-----CCTATGTAACATGGTCCACTA----- mirR 21 1
-----CTATGTAACATGGTCCACTAACTC----- mirR 24 1
-----TCTCAGTATCCAATCCATCC----- morR 20 3
-----TCTCAGTATCCAATCCATCCT----- morR 21 3
-----TCTCAGTATCCAATCCATCCTCGGAGGGCAGGGC----- morR 34 1
-----CTCAGTATCCAATCCATCCT----- morR 20 1
-----TCTCAGTATCCAATCCATCCTCGGA----- morR 25 1
-----TCAGTATCCAATCCATCC----- morR 18 1
-----TCTCAGTATCCAATCCATCCTCGGAGGGC----- morR 29 1
-----TCTCAGTATCCAATCCATCCTCGGAGGG----- morR 28 1

```

>mmu-mir-302a

| Species | len | reads |
|---------|-----|-------|
| mirL    | 18  | 26    |
| mirL    | 18  | 17    |
| mirL    | 19  | 12    |
| mirL    | 19  | 5     |
| mirL    | 18  | 3     |
| mirL    | 18  | 2     |
| mirL    | 20  | 2     |
| mirL    | 20  | 2     |
| mirL    | 21  | 2     |
| mirL    | 20  | 2     |
| mirL    | 18  | 2     |
| mirL    | 20  | 1     |
| mirL    | 22  | 19635 |
| mirL    | 23  | 5670  |
| mirL    | 21  | 2565  |
| mirL    | 21  | 2240  |
| mirL    | 22  | 2035  |
| mirL    | 23  | 1423  |
| mirL    | 22  | 529   |
| mirL    | 21  | 514   |
| mirL    | 20  | 317   |
| mirL    | 22  | 296   |
| mirL    | 20  | 276   |
| mirL    | 24  | 251   |
| mirL    | 22  | 172   |

```

-----TTAAACGTGGTTGTACTTGCTTT----- mirL 23 123
-----TAAACGTGGTTGTACTTGC----- mirL 19 98
-----TAAACGTGGTTGTACTTGCTTTAG----- mirL 24 92
-----ACTTAAACGTGGTTGTACTT----- mirL 20 78
-----TTAAACGTGGTTGTACTTGCT----- mirL 21 59
-----ACTTAAACGTGGTTGTACTTGCTTT----- mirL 25 58
-----ACTTAAACGTGGTTGTACT----- mirL 19 34
-----TAAACGTGGTTGTACTTG----- mirL 18 31
-----CTTAAACGTGGTTGTACTTG----- mirL 20 28
-----AAACGTGGTTGTACTTGCT----- mirL 19 26
-----CTTAAACGTGGTTGTACTTGCT----- mirL 21 25
-----CTTAAACGTGGTTGTACTTGCTTT----- mirL 23 15
-----ACGTGGTTGTACTTGCTTTAGA----- mirL 22 15
-----AACGTGGTTGTACTTGCT----- mirL 18 14
-----ACGTGGTTGTACTTGCTTT----- mirL 19 9
-----AACGTGGTTGTACTTGCTTT----- mirL 20 9
-----AAACGTGGTTGTACTTGC----- mirL 18 9
-----TTAAACGTGGTTGTACTTGC----- mirL 20 8
-----CTTAAACGTGGTTGTACTT----- mirL 19 5
-----CTTAAACGTGGTTGTACTTGCTTT----- mirL 24 3
-----TTAAACGTGGTTGTACTTG----- mirL 19 3
-----TTAAACGTGGTTGTACTTGCTTTA----- mirL 24 2
-----AAACGTGGTTGTACTTGCTTTAG----- mirL 23 2
-----TTAAACGTGGTTGTACTT----- mirL 18 1
-----AAACGTGGTTGTACTTGCTTTAGA----- mirL 24 1
-----ACGTGGTTGTACTTGCTTTA----- mirL 20 1
-----TAAGTGCTTCCATGTTTTGGTGA----- mirR 23 42768
-----AAGTGCTTCCATGTTTTGGTGA----- mirR 22 14454
-----TAAGTGCTTCCATGTTTTGGTGAT----- mirR 24 4317
-----TAAGTGCTTCCATGTTTTGGTG----- mirR 22 2440
-----AAGTGCTTCCATGTTTTGGTGAT----- mirR 23 2262
-----TAAGTGCTTCCATGTTTTGGT----- mirR 21 1377
-----TAAGTGCTTCCATGTTTTG----- mirR 19 453
-----AGTGCTTCCATGTTTTGGTGA----- mirR 21 450
-----AAGTGCTTCCATGTTTTGGTG----- mirR 21 320
-----AAGTGCTTCCATGTTTTGGTGATG----- mirR 24 272
-----TAAGTGCTTCCATGTTTTGGTGATG----- mirR 25 263
-----TAAGTGCTTCCATGTTTTGG----- mirR 20 109
-----AAGTGCTTCCATGTTTTGGT----- mirR 20 92
-----AGTGCTTCCATGTTTTGGTGAT----- mirR 22 62
-----AAGTGCTTCCATGTTTTGGTGATGG----- mirR 25 38
-----GTAAGTGCTTCCATGTTTTGGT----- mirR 22 32
-----AAGTGCTTCCATGTTTTG----- mirR 18 32
-----AGTGCTTCCATGTTTTGGTG----- mirR 20 25
-----GTAAGTGCTTCCATGTTTTGGTGA----- mirR 24 25
-----GTGCTTCCATGTTTTGGTGA----- mirR 20 9

```

```

-----GTGCTTCCATGTTTTGGTGAT----- mirR 21 8
-----GTAAGTGCTTCCATGTTTTGGTGAT----- mirR 25 6
-----AGTAAGTGCTTCCATGTTTTG----- mirR 21 5
-----AGTGCTTCCATGTTTTGGTGATG----- mirR 23 5
-----GTGCTTCCATGTTTTGGTGATG----- mirR 22 4
-----AGTGCTTCCATGTTTTGGT----- mirR 19 4
-----AGTAAGTGCTTCCATGTTTTGG----- mirR 22 3
-----GTAAGTGCTTCCATGTTTTG----- mirR 20 2
-----GTAAGTGCTTCCATGTTTTGGTGATGG----- mirR 27 1
-----GTAAGTGCTTCCATGTTTTGGTGATG----- mirR 26 1
-----GTAAGTGCTTCCATGTTTTGGTG----- mirR 23 1
-----GTGCTTCCATGTTTTGGTG----- mirR 19 1
-----AAGTAAGTGCTTCCATGT----- mirR 18 1
-----TGGTATGTTTTCCTTTATATTCATGC----- morR 26 10
-----ATGGTATGTTTTCCTTTA----- morR 18 5
-----TGGTATGTTTTCCTTTATATTCATGCCTTTGTAAA morR 35 3
-----GATGGTATGTTTTCCTTT----- morR 18 1

```

>mmu-mir-96

| sequence                                                                                                                | species | len | reads |
|-------------------------------------------------------------------------------------------------------------------------|---------|-----|-------|
| CAGTACCATCTGCTTGGCCGATTTTGGCACTAGCACATTTTTGCTTGTGTCTCTCCGCTGTGAGCAATCATGTGTAGTGCCAATATGGGAAAAGCGGGCTGCTGCGCCACGTTACCTCC | morL    | 19  | 76    |
| ---TACCATCTGCTTGGCCGAT---                                                                                               | morL    | 18  | 54    |
| ---ACCATCTGCTTGGCCGAT---                                                                                                | morL    | 20  | 46    |
| --GTACCATCTGCTTGGCCGAT--                                                                                                | morL    | 19  | 9     |
| ---ACCATCTGCTTGGCCGATT---                                                                                               | morL    | 21  | 7     |
| --GTACCATCTGCTTGGCCGATT--                                                                                               | morL    | 21  | 7     |
| -AGTACCATCTGCTTGGCCGAT-                                                                                                 | morL    | 18  | 3     |
| ---CCATCTGCTTGGCCGATT---                                                                                                | morL    | 18  | 3     |
| ---TACCATCTGCTTGGCCGA---                                                                                                | morL    | 19  | 2     |
| --GTACCATCTGCTTGGCCGA--                                                                                                 | morL    | 21  | 2     |
| ---TACCATCTGCTTGGCCGATTT---                                                                                             | morL    | 20  | 1     |
| ---ACCATCTGCTTGGCCGATTT---                                                                                              | morL    | 18  | 1     |
| -GTACCATCTGCTTGGCCG-                                                                                                    | morL    | 20  | 1     |
| CAGTACCATCTGCTTGGCCG---                                                                                                 | morL    | 22  | 1     |
| CAGTACCATCTGCTTGGCCGAT---                                                                                               | morL    | 20  | 1     |
| ---TACCATCTGCTTGGCCGATT---                                                                                              | mirL    | 23  | 90738 |
| TTTGGCACTAGCACATTTTTGCT---                                                                                              | mirL    | 22  | 1742  |
| TTTGGCACTAGCACATTTTTGC-----                                                                                             | mirL    | 24  | 906   |
| TTTGGCACTAGCACATTTTTGCTT-----                                                                                           | mirL    | 21  | 778   |
| TTTGGCACTAGCACATTTTTG-----                                                                                              | mirL    | 22  | 728   |
| TTTGGCACTAGCACATTTTTGCT-----                                                                                            | mirL    | 25  | 307   |
| TTTGGCACTAGCACATTT-----                                                                                                 | mirL    | 18  | 104   |
| TTTGGCACTAGCACATTT-----                                                                                                 | mirL    | 19  | 81    |
| ---GGCACTAGCACATTTTTGCT---                                                                                              | mirL    | 20  | 39    |
| ---TGGCACTAGCACATTTTTGCT---                                                                                             | mirL    | 21  | 33    |
| ---TTGGCACTAGCACATTTTTGCT---                                                                                            | mirL    | 21  | 29    |

```

-----TGGCACTAGCACATTTTTGCT----- mirL 20 22
-----TTGGCACTAGCACATTTTTGCTT----- mirL 23 21
-----TTTTGGCACTAGCACATTTTTGCT----- mirL 24 16
-----TTGGCACTAGCACATTTTTG----- mirL 20 13
-----TTGGCACTAGCACATTTTTGCTTG----- mirL 24 9
-----GATTTTGGCACTAGCACATTTTTGCT----- mirL 26 5
-----GGCACTAGCACATTTTTGCT----- mirL 19 4
-----GATTTTGGCACTAGCACATTTTTG----- mirL 24 4
-----TGGCACTAGCACATTTTTG----- mirL 19 3
-----ATTTTGGCACTAGCACAT----- mirL 18 2
-----TGGCACTAGCACATTTTTGCTT----- mirL 22 1
-----GGCACTAGCACATTTTTGCTTG----- mirL 22 1
-----GGCACTAGCACATTTTTG----- mirL 18 1
-----TTGGCACTAGCACATTTTTGCTTGT----- mirL 25 1
-----GCTTGTGTCTCTCCGCTGTGA----- loop 21 1
-----TGTGTCTCTCCGCTGTGAGC----- loop 20 1
-----TGTGTCTCTCCGCTGTGA----- loop 18 1
-----CAATCATGTGTAGTGCCAATAT----- mirR 22 6622
-----CAATCATGTGTAGTGCCAATA----- mirR 21 646
-----AATCATGTGTAGTGCCAATATG----- mirR 22 389
-----CAATCATGTGTAGTGCCAATATG----- mirR 23 371
-----CAATCATGTGTAGTGCCAAT----- mirR 20 315
-----AATCATGTGTAGTGCCAATAT----- mirR 21 230
-----CAATCATGTGTAGTGCCA----- mirR 19 95
-----GCAATCATGTGTAGTGCCAATA----- mirR 22 90
-----AATCATGTGTAGTGCCAATA----- mirR 20 56
-----AATCATGTGTAGTGCCAAT----- mirR 19 36
-----CAATCATGTGTAGTGCCA----- mirR 18 28
-----CAATCATGTGTAGTGCCAATATGG----- mirR 24 19
-----ATCATGTGTAGTGCCAATATG----- mirR 21 15
-----GCAATCATGTGTAGTGCCAAT----- mirR 21 11
-----GCAATCATGTGTAGTGCCAATAT----- mirR 23 8
-----ATCATGTGTAGTGCCAATAT----- mirR 20 6
-----AATCATGTGTAGTGCCA----- mirR 18 5
-----GCAATCATGTGTAGTGCCA----- mirR 20 3
-----AATCATGTGTAGTGCCAATATGG----- mirR 23 3
-----AGCAATCATGTGTAGTGCCAAT----- mirR 22 2
-----ATCATGTGTAGTGCCAAT----- mirR 18 1
-----ATCATGTGTAGTGCCAATATGG----- mirR 22 1
-----GCAATCATGTGTAGTGCC----- mirR 18 1
-----GAGCAATCATGTGTAGTG----- mirR 18 1
-----TCATGTGTAGTGCCAATA----- mirR 18 1
-----ATCATGTGTAGTGCCAATA----- mirR 19 1
-----AGCAATCATGTGTAGTGCC----- mirR 19 1
-----GGGAAAAGCGGGCTGCTGCGG----- morR 21 26
-----GGGAAAAGCGGGCTGCTGCG----- morR 20 10

```



```
-----GGGAAAAGCGGGCTGCTGCGGCC----- morR 23 5
-----GGGAAAAGCGGGCTGCTGCGGC----- morR 22 4
-----GGGAAAAGCGGGCTGCTGC----- morR 19 3
-----GGGAAAAGCGGGCTGCTG----- morR 18 3
-----GGGAAAAGCGGGCTGCTGCGGCCACGTTACACTCC morR 35 2
-----TATGGGAAAAGCGGGCTGCTG----- morR 21 1
-----GGAAAAGCGGGCTGCTGCGG----- morR 20 1
-----TATGGGAAAAGCGGGCTGCTGCG----- morR 23 1
```

>mmu-mir-298

AGGCATAAGAGGCCAGGCCTTGGCAGAGGAGGGCTGTTCTTCCCTTGAGTTTTATGACTGGGAGGAACTAGCCTTCTCTCAGCTTAGGAGTGGGCCAACAGCTTCCCTCCGATCTCCAGGAGAATGTTGCTGGTTGACA

```
AGGCATAAGAGGCCAGGCC-----
---CATAAGAGGCCAGGCC-----
-----GGCAGAGGAGGGCTGTTCTTCCC-----
-----GGCAGAGGAGGGCTGTTCTTCCCT-----
-----GGCAGAGGAGGGCTGTTCTTCCC-----
-----GGCAGAGGAGGGCTGTTCTTCCCTT-----
-----GGCAGAGGAGGGCTGTTCTTCCCTTG-----
-----GGCAGAGGAGGGCTGTTCTTCC-----
-----GGCAGAGGAGGGCTGTTCTTCCCTTGA-----
-----CAGAGGAGGGCTGTTCTTCCC-----
-----CAGAGGAGGGCTGTTCTTCCC-----
-----CAGAGGAGGGCTGTTCTTCCCT-----
-----CAGAGGAGGGCTGTTCTTCCCTTG-----
-----CAGAGGAGGGCTGTTCTTCCCTT-----
-----GCAGAGGAGGGCTGTTCTTCCC-----
-----CAGAGGAGGGCTGTTCTTCCCTTGA-----
-----CAGAGGAGGGCTGTTCTTCC-----
-----GCAGAGGAGGGCTGTTCTTCCCT-----
-----GCAGAGGAGGGCTGTTCTTCCC-----
-----AGAGGAGGGCTGTTCTTCCCTTG-----
-----GCAGAGGAGGGCTGTTCTTCCCTTG-----
-----AGAGGAGGGCTGTTCTTCCC-----
-----GCAGAGGAGGGCTGTTCTTCCCTT-----
-----AGAGGAGGGCTGTTCTTCC-----
-----AGAGGAGGGCTGTTCTTCCC-----
-----TGGCAGAGGAGGGCTGTTCTTCCC-----
-----AGAGGAGGGCTGTTCTTCCCT-----
-----GCAGAGGAGGGCTGTTCTT-----
-----TGGCAGAGGAGGGCTGTTCTTCCC-----
-----TTGGCAGAGGAGGGCTGTTCTTCCC-----
-----TTGGCAGAGGAGGGCTGTTCTTCCCT-----
-----TGGCAGAGGAGGGCTGTTCTTCCCT-----
-----TGGCAGAGGAGGGCTGTTCTTCCCTT-----
-----AGAGGAGGGCTGTTCTTCCCTT-----
-----TTGGCAGAGGAGGGCTGTTCTT-----
```

```

-----GCAGAGGAGGGCTGTTCTTC-----
-----TCCTTCCGATCTCCAGGA-----
-----TCCTTCCGATCTCCAGGAG-----
-----GCTTCCTTCCGATCTCCA-----
-----TCCTTCCGATCTCCAGGAGA-----
-----TTCCTTCCGATCTCCAGGA-----
-----CTTCCGATCTCCAGGAGA-----
-----CCTTCCGATCTCCAGGAG-----
-----ATGTTGCTGGTTGACA-----
-----GAGAATGTTGCTGGTTGA-----
-----TGTGCTGGTTGACA-----
-----AATGTTGCTGGTTGACA-----
-----GGAGAATGTTGCTGGTTG-----
-----AATGTTGCTGGTTGACA-----

```

>mmu-mir-22

| Sequence                                                                                                    | species | len | reads |
|-------------------------------------------------------------------------------------------------------------|---------|-----|-------|
| CACCCCTCACCTGGCTGAGCCGAGTAGTTCTTCAGTGGCAAGCTTTATGTCCTGACCCAGCTAAAGCTGCCAGTTGAAGAAGTGTGGCCCTCTGCCCTGGCTTCGTT | morL    | 19  | 5     |
| CTCACCTGGCTGAGCCGCA                                                                                         | morL    | 18  | 3     |
| CTCACCTGGCTGAGCCGCA                                                                                         | morL    | 20  | 3     |
| TCACCTGGCTGAGCCGAGT                                                                                         | morL    | 21  | 1     |
| TCACCTGGCTGAGCCGAGTA                                                                                        | morL    | 25  | 1     |
| CACCCCTCACCTGGCTGAGCCGAGT                                                                                   | morL    | 19  | 1     |
| CACCTGGCTGAGCCGAGT                                                                                          | mirL    | 22  | 21837 |
| AGTTCTTCAGTGGCAAGCTTTA                                                                                      | mirL    | 21  | 12874 |
| AGTTCTTCAGTGGCAAGCTTT                                                                                       | mirL    | 23  | 4643  |
| AGTTCTTCAGTGGCAAGCTTTAT                                                                                     | mirL    | 20  | 1001  |
| AGTTCTTCAGTGGCAAGCTT                                                                                        | mirL    | 19  | 581   |
| AGTTCTTCAGTGGCAAGCTTTATG                                                                                    | mirL    | 24  | 156   |
| AGTTCTTCAGTGGCAAGC                                                                                          | mirL    | 18  | 105   |
| GTTCTTCAGTGGCAAGCTTT                                                                                        | mirL    | 20  | 86    |
| GTTCTTCAGTGGCAAGCTTTA                                                                                       | mirL    | 21  | 62    |
| TAGTTCTTCAGTGGCAAGCTTT                                                                                      | mirL    | 22  | 26    |
| TAGTTCTTCAGTGGCAAGCTTTA                                                                                     | mirL    | 23  | 17    |
| GTTCTTCAGTGGCAAGCTTTAT                                                                                      | mirL    | 22  | 13    |
| TTCTTCAGTGGCAAGCTTT                                                                                         | mirL    | 19  | 11    |
| GTTCTTCAGTGGCAAGCTT                                                                                         | mirL    | 19  | 8     |
| TCTTCAGTGGCAAGCTTTA                                                                                         | mirL    | 19  | 8     |
| TCTTCAGTGGCAAGCTTT                                                                                          | mirL    | 18  | 8     |
| AGTAGTTCTTCAGTGGCAAGCTTT                                                                                    | mirL    | 24  | 4     |
| TAGTTCTTCAGTGGCAAGCTT                                                                                       | mirL    | 21  | 4     |
| GTTCTTCAGTGGCAAGCT                                                                                          | mirL    | 18  | 3     |
| TTCTTCAGTGGCAAGCTT                                                                                          | mirL    | 18  | 2     |
| GTAGTTCTTCAGTGGCAA                                                                                          | mirL    | 18  | 2     |
| GTTCTTCAGTGGCAAGCTTTATG                                                                                     | mirL    | 23  | 1     |
| TTCTTCAGTGGCAAGCTTTAT                                                                                       | mirL    | 21  | 1     |

|                                                                                                             |         |     |       |
|-------------------------------------------------------------------------------------------------------------|---------|-----|-------|
| -----TAGTTCTTCAGTGGCAAGCTTTAT-----                                                                          | mirL    | 24  | 1     |
| -----TATGTCCTGACCCAGCTAAA-----                                                                              | loop    | 20  | 1     |
| -----TGTCCTGACCCAGCTAAAG-----                                                                               | loop    | 19  | 1     |
| -----TATGTCCTGACCCAGCTAA-----                                                                               | loop    | 19  | 1     |
| -----AAGCTGCCAGTTGAAGAACTGT-----                                                                            | mirR    | 22  | 48603 |
| -----AAGCTGCCAGTTGAAGAACTGTT-----                                                                           | mirR    | 23  | 5048  |
| -----AAGCTGCCAGTTGAAGAACTGTTG-----                                                                          | mirR    | 24  | 3412  |
| -----AAGCTGCCAGTTGAAGAACTG-----                                                                             | mirR    | 21  | 1420  |
| -----AAGCTGCCAGTTGAAGAACT-----                                                                              | mirR    | 20  | 1277  |
| -----AAGCTGCCAGTTGAAGAAC-----                                                                               | mirR    | 19  | 779   |
| -----AAGCTGCCAGTTGAAGAA-----                                                                                | mirR    | 18  | 278   |
| -----AGCTGCCAGTTGAAGAACTGT-----                                                                             | mirR    | 21  | 141   |
| -----AGCTGCCAGTTGAAGAACTGTT-----                                                                            | mirR    | 22  | 27    |
| -----AAAGCTGCCAGTTGAAGAACTGT-----                                                                           | mirR    | 23  | 26    |
| -----GCTGCCAGTTGAAGAACTGTTG-----                                                                            | mirR    | 22  | 21    |
| -----GCTGCCAGTTGAAGAACTGT-----                                                                              | mirR    | 20  | 17    |
| -----CTGCCAGTTGAAGAACTGT-----                                                                               | mirR    | 19  | 14    |
| -----AGCTGCCAGTTGAAGAACTGTTG-----                                                                           | mirR    | 23  | 9     |
| -----GCTGCCAGTTGAAGAACTGTT-----                                                                             | mirR    | 21  | 6     |
| -----AGCTGCCAGTTGAAGAACT-----                                                                               | mirR    | 19  | 4     |
| -----GCTGCCAGTTGAAGAACTGTTGC-----                                                                           | mirR    | 23  | 4     |
| -----AAAGCTGCCAGTTGAAGAAC-----                                                                              | mirR    | 20  | 3     |
| -----AGCTGCCAGTTGAAGAACTG-----                                                                              | mirR    | 20  | 3     |
| -----AAAGCTGCCAGTTGAAGAACTGTTG-----                                                                         | mirR    | 25  | 3     |
| -----CTGCCAGTTGAAGAACTGTTGC-----                                                                            | mirR    | 22  | 3     |
| -----AAAGCTGCCAGTTGAAGAACTGTT-----                                                                          | mirR    | 24  | 2     |
| -----AGCTGCCAGTTGAAGAAC-----                                                                                | mirR    | 18  | 2     |
| -----TAAAGCTGCCAGTTGAAGAACT-----                                                                            | mirR    | 22  | 1     |
| -----TAAAGCTGCCAGTTGAAGAACTGT-----                                                                          | mirR    | 24  | 1     |
| -----CTGCCAGTTGAAGAACTGTT-----                                                                              | mirR    | 20  | 1     |
| -----AAAGCTGCCAGTTGAAGAACTGTTGCC-----                                                                       | mirR    | 28  | 1     |
| -----AAAGCTGCCAGTTGAAGAACTG-----                                                                            | mirR    | 22  | 1     |
| -----AAAGCTGCCAGTTGAAGA-----                                                                                | mirR    | 18  | 1     |
| -----TGCCCTCTGCCCTGGCTTCGT-----                                                                             | morR    | 22  | 1     |
| -----TGCCCTCTGCCCTGGCT-----                                                                                 | morR    | 18  | 1     |
| <br>                                                                                                        |         |     |       |
| >mmu-mir-34b                                                                                                |         |     |       |
| GGGCGCCCGGTGCTCGGTTTGTAGGCAGTGTAAATTAGCTGATTGTAGTGCGGTGTGACAATCACTAACTCCACTGCCATCAAAAACAGGCACAGCATCACCCGCCG | species | len | reads |
| ---CGCCCGGTGCTCGGTTTG-----                                                                                  | morL    | 18  | 650   |
| ---CCCGGTGCTCGGTTTGTA-----                                                                                  | morL    | 18  | 13    |
| ---CGCCCGGTGCTCGGTTTGT-----                                                                                 | morL    | 19  | 7     |
| ---GCGCCCGGTGCTCGGTTTG-----                                                                                 | morL    | 19  | 5     |
| ---GCCCGGTGCTCGGTTTGT-----                                                                                  | morL    | 18  | 3     |
| ---CGCCCGGTGCTCGGTTTGTA-----                                                                                | morL    | 20  | 1     |
| ---GCCCGGTGCTCGGTTTGTA-----                                                                                 | morL    | 19  | 1     |
| ---GCGCCCGGTGCTCGGTTTGT-----                                                                                | morL    | 20  | 1     |

```

GGGCGCCCGGTGCTCGGTTT----- morL 20 1
-----AGGCAGTGTAAATTAGCTGATTGT----- mirL 23 18512
-----AGGCAGTGTAAATTAGCTGATTGTA----- mirL 24 1453
-----TAGGCAGTGTAAATTAGCTGATTGT----- mirL 24 911
-----AGGCAGTGTAAATTAGCTGATTG----- mirL 22 831
-----TAGGCAGTGTAAATTAGCTGATTG----- mirL 23 440
-----AGGCAGTGTAAATTAGCTGATT----- mirL 21 352
-----AGGCAGTGTAAATTAGCTGATT----- mirL 20 200
-----TAGGCAGTGTAAATTAGCTGATT----- mirL 22 158
-----AGGCAGTGTAAATTAGCTGATTGTAG----- mirL 25 71
-----TAGGCAGTGTAAATTAGCTGATTGTA----- mirL 25 63
-----AGGCAGTGTAAATTAGCTGATT----- mirL 19 58
-----TAGGCAGTGTAAATTAGCTGATT----- mirL 21 54
-----TAGGCAGTGTAAATTAGCTGATT----- mirL 20 19
-----TAGGCAGTGTAAATTAGCTGATT----- mirL 18 12
-----GGCAGTGTAAATTAGCTGATTGT----- mirL 22 12
-----GTAGGCAGTGTAAATTAGCTGATTGT----- mirL 25 5
-----GCAGTGTAAATTAGCTGATTGT----- mirL 21 4
-----CAGTGTAAATTAGCTGATTGT----- mirL 19 3
-----GGCAGTGTAAATTAGCTGATTG----- mirL 21 2
-----GTAGGCAGTGTAAATTAGCTGATTG----- mirL 24 1
-----CAGTGTAAATTAGCTGATTGTA----- mirL 21 1
-----GGCAGTGTAAATTAGCTGATT----- mirL 18 1
-----CAGTGTAAATTAGCTGATTGT----- mirL 20 1
-----GCAGTGTAAATTAGCTGATTG----- mirL 20 1
-----GTAGGCAGTGTAAATTAGCTGATTGTA----- mirL 26 1
-----TAGTGCGGTGCTGACAAT----- loop 18 2
-----AATCACTAACTCCACTGCCATC----- mirR 22 42070
-----AATCACTAACTCCACTGCCATCA----- mirR 23 10662
-----ATCACTAACTCCACTGCCATCA----- mirR 22 7054
-----AATCACTAACTCCACTGCCAT----- mirR 21 6916
-----ATCACTAACTCCACTGCCATC----- mirR 21 4261
-----CAATCACTAACTCCACTGCCAT----- mirR 22 1497
-----AATCACTAACTCCACTGCCA----- mirR 20 964
-----AATCACTAACTCCACTGCCATCAA----- mirR 24 822
-----CAATCACTAACTCCACTGCCATC----- mirR 23 620
-----CAATCACTAACTCCACTGCCA----- mirR 21 549
-----ATCACTAACTCCACTGCCATCAA----- mirR 23 459
-----ATCACTAACTCCACTGCCAT----- mirR 20 458
-----AATCACTAACTCCACTGCC----- mirR 18 304
-----AATCACTAACTCCACTGCC----- mirR 19 198
-----CAATCACTAACTCCACTGCCATCA----- mirR 24 160
-----ATCACTAACTCCACTGCCA----- mirR 19 66
-----TCACTAACTCCACTGCCATCA----- mirR 21 62
-----CAATCACTAACTCCACTGCC----- mirR 20 55
-----CACTAACTCCACTGCCATC----- mirR 19 33

```

```
-----ATCACTAACTCCACTGCC----- mirR 18 27
-----TCACTAACTCCACTGCCATC----- mirR 20 17
-----ATCACTAACTCCACTGCCATCAAA----- mirR 24 17
-----TCACTAACTCCACTGCCATCAA----- mirR 22 17
-----CAATCACTAACTCCACTGCCATCAA----- mirR 25 16
-----CAATCACTAACTCCACTG----- mirR 18 16
-----TCACTAACTCCACTGCCAT----- mirR 19 8
-----CACTAACTCCACTGCCATCA----- mirR 20 6
-----ACAATCACTAACTCCACTGCCATC----- mirR 24 4
-----CACTAACTCCACTGCCAT----- mirR 18 3
-----ACAATCACTAACTCCACTGCCAT----- mirR 23 2
-----ACAATCACTAACTCCACT----- mirR 18 2
-----ACAATCACTAACTCCACTGCCATCA----- mirR 25 2
-----CACTAACTCCACTGCCATCAA----- mirR 21 2
-----CAAAAACAAGGCACAGCAT----- morR 18 4
-----AAAACAAGGCACAGCATCACC----- morR 21 1
-----AACAAGGCACAGCATCACC----- morR 19 1
-----AACAAGGCACAGCATCACC----- morR 24 1
```

>mmu-mir-1983

GTAGAGTGTGCACAGCCTTTACAGAGAAAGCATGCTCCAGTGGCGCAATCGGTTAGCGCGCGGTACTTATACAGCAGTATATGTGCGGGTGATGCCGAGGTTGTGAGTTCGAGCCTCACCTGGAGCATGTTTTCTTCCTT  
GTAGAGTGTGCACAGCCTTTAC-----

```
-----GAAAGCATGCTCCAGTGGCGC-----
-----GAAAGCATGCTCCAGTGGCG-----
-----AAAGCATGCTCCAGTGGCGCAATCGGTTAGC-----
-----GAAAGCATGCTCCAGTGGCGCA-----
-----GAAAGCATGCTCCAGTGG-----
-----AAGCATGCTCCAGTGGCGCAATCGGTTAGCGC-----
-----AGCATGCTCCAGTGGCGCAATCGGTTAGCGC-----
-----AAAGCATGCTCCAGTGGCGC-----
-----AGAAAGCATGCTCCAGTGGCGC-----
-----AAAGCATGCTCCAGTGGCGCA-----
-----GAAAGCATGCTCCAGTGGCGCAA-----
-----GAAAGCATGCTCCAGTGGCGCAATCGGTTAGC-----
-----AAAGCATGCTCCAGTGGCG-----
-----AAAGCATGCTCCAGTGGCGCAA-----
-----AAAGCATGCTCCAGTGGCGCAATCGGTTAGCGC-----
-----GAAAGCATGCTCCAGTGGC-----
-----AAAGCATGCTCCAGTGGCGCAATCGGTTAGCG-----
-----AGAAAGCATGCTCCAGTGG-----
-----AGAAAGCATGCTCCAGTGGCG-----
-----AGCATGCTCCAGTGGCGCAATCGGTTAGC-----
-----AGAAAGCATGCTCCAGTGGCGCA-----
-----AGCATGCTCCAGTGGCGCAATC-----
-----AAGCATGCTCCAGTGGCGCAATCGGTTAGC-----
-----AGCATGCTCCAGTGGCGCAATCGGTTAGCGCGC-----
```

-----AGCATGCTCCAGTGGCGCAATCGGTTAG-----  
-----AGCATGCTCCAGTGGCGCAATCGGT-----  
-----AAGCATGCTCCAGTGGCGCAAT-----  
-----AGCATGCTCCAGTGGCGCA-----  
-----AGAGAAAGCATGCTCCAGTGGCGC-----  
-----AAGCATGCTCCAGTGGCGC-----  
-----AAGCATGCTCCAGTGGCGCAATCGGTT-----  
-----GAGAAAGCATGCTCCAGTGGCGC-----  
-----AAGCATGCTCCAGTGGCGCAA-----  
-----AGAAAGCATGCTCCAGTGGC-----  
-----AGAGAAAGCATGCTCCAGTGG-----  
-----AAGCATGCTCCAGTGGCGCAATC-----  
-----AGAGAAAGCATGCTCCAGTGGCG-----  
-----AGAAAGCATGCTCCAGTGGCGCAA-----  
-----AGAAAGCATGCTCCAGTG-----  
-----AGAGAAAGCATGCTCCAGT-----  
-----GAGAAAGCATGCTCCAGTGGCGCAATCGGTTA-----  
-----AGAGAAAGCATGCTCCAGTGGCGCAAT-----  
-----AGAGAAAGCATGCTCCAGTGGCGCA-----  
-----AGAGAAAGCATGCTCCAGTGGC-----  
-----GAGAAAGCATGCTCCAGTGGCGCA-----  
-----GAGAAAGCATGCTCCAGTGGC-----  
-----GAGAAAGCATGCTCCAGTGGCG-----  
-----GAGAAAGCATGCTCCAGTGG-----  
-----CTCACCTGGAGCATGTTTTCT-----  
-----CTCACCTGGAGCATGTTTTCTT-----  
-----TCACCTGGAGCATGTTTTCTT-----  
-----CTCACCTGGAGCATGTTTTCT-----  
-----TCACCTGGAGCATGTTTTCTTCTC-----  
-----TCACCTGGAGCATGTTTTCT-----  
-----GCCTCACCTGGAGCATGT-----  
-----CTCACCTGGAGCATGTTTTCTTCTC-----  
-----CTCACCTGGAGCATGTTTT-----  
-----CCTCACCTGGAGCATGTTTTCT-----  
-----TCACCTGGAGCATGTTTTCT-----  
-----TCACCTGGAGCATGTTTTCTTCTC-----  
-----CTCACCTGGAGCATGTTTT-----  
-----ACCTGGAGCATGTTTTCTTCTCC-----  
-----CTCACCTGGAGCATGTTTTCTTCTC-----  
-----ACCTGGAGCATGTTTTCTTCTCC-----  
-----CCTCACCTGGAGCATGTTTTCT-----  
-----AGCCTCACCTGGAGCATGT-----  
-----TCACCTGGAGCATGTTTT-----  
-----CCTCACCTGGAGCATGTTTT-----  
-----TCACCTGGAGCATGTTTTCTTCTCC-----  
-----CACCTGGAGCATGTTTTCTTCTC-----

-----CACCTGGAGCATGTTTTCTT-----  
-----ACCTGGAGCATGTTTTCTTCC-----  
-----CCTCACCTGGAGCATGTTT-----  
-----ACCTGGAGCATGTTTTCTTCCCTT-----  
-----CCTCACCTGGAGCATGTTTT-----  
-----CCTCACCTGGAGCATGTTTTCTT-----  
-----CACCTGGAGCATGTTTTCTT-----  
-----CACCTGGAGCATGTTTTCTTCC-----  
-----ACCTGGAGCATGTTTTCTTCCCTT-----  
-----GCCTCACCTGGAGCATGTT-----  
-----ACCTGGAGCATGTTTTCTT-----  
-----CACCTGGAGCATGTTTTCT-----  
-----ACCTGGAGCATGTTTTCT-----  
-----CACCTGGAGCATGTTTTCT-----  
-----CACCTGGAGCATGTTTTCT-----  
-----AGCCTCACCTGGAGCATGTTTTCT-----  
-----AGCCTCACCTGGAGCATGTTTTCT-----  
-----CCTCACCTGGAGCATGTTTTCTT-----  
-----GCCTCACCTGGAGCATGTTTTCT-----  
-----AGCCTCACCTGGAGCATGTT-----  
-----AGCCTCACCTGGAGCATGTTTT-----  
-----CACCTGGAGCATGTTTTCTTCCCT-----  
-----GCCTCACCTGGAGCATGTTT-----  
-----AGCCTCACCTGGAGCATG-----  
-----GCCTCACCTGGAGCATGTTTT-----  
-----GCCTCACCTGGAGCATGTTTTCT-----  
-----GCCTCACCTGGAGCATGTTTTCTTCCCTT-----  
-----AGCCTCACCTGGAGCATGTTTTCTT-----  
-----CCTT-----  
-----TTCCCTT-----  
-----CCCTT-----  
-----TTCCCTT-----  
-----CCCTT-----  
-----TCCCTT-----  
-----CCCTT-----  
-----TCTTCCCTT-----  
-----TTCCCTT-----  
-----CCCTT-----  
-----TCCCTT-----

>mmu-mir-106a

| Species | len | reads |
|---------|-----|-------|
| morL    | 18  | 3     |
| morL    | 19  | 3     |
| morL    | 23  | 2     |
| morL    | 18  | 1     |
| morL    | 19  | 1     |

```

-----ATGCCTTGGCCATGTCAA----- morL 18 1
---GGAGTATGCCTTGGCCATGT----- morL 20 1
---GAGTATGCCTTGGCCATGTC----- morL 20 1
---AGTATGCCTTGGCCATGTC----- morL 19 1
-----CAAAGTGCTAACAGTGCAGGTAG----- mirL 23 43955
-----CAAAGTGCTAACAGTGCAGGTAGC----- mirL 24 17357
-----CAAAGTGCTAACAGTGCAGGTA----- mirL 22 16265
-----CAAAGTGCTAACAGTGCAGGT----- mirL 21 12937
---AAAGTGCTAACAGTGCAGGTAG----- mirL 22 1787
-----CAAAGTGCTAACAGTGCAGGTAGCT----- mirL 25 1365
-----CAAAGTGCTAACAGTGCAGG----- mirL 20 1236
-----CAAAGTGCTAACAGTGCAG----- mirL 19 567
---AAAGTGCTAACAGTGCAGGTAGC----- mirL 23 509
-----AAAGTGCTAACAGTGCAGGTA----- mirL 21 162
---AGTGCTAACAGTGCAGGTA----- mirL 19 97
-----AAAGTGCTAACAGTGCAGGT----- mirL 20 95
---AAGTGCTAACAGTGCAGGTA----- mirL 20 52
-----AAAGTGCTAACAGTGCAGGTAGCT----- mirL 24 49
-----TCAAAGTGCTAACAGTGCAGGTAGC----- mirL 25 46
-----AGTGCTAACAGTGCAGGTAG----- mirL 20 25
-----TCAAAGTGCTAACAGTGCAGGTAG----- mirL 24 24
-----AAGTGCTAACAGTGCAGGTAG----- mirL 21 21
-----TCAAAGTGCTAACAGTGCAGGT----- mirL 22 16
-----AAGTGCTAACAGTGCAGGTAGC----- mirL 22 15
---AGTGCTAACAGTGCAGGT----- mirL 18 15
-----AAAGTGCTAACAGTGCAG----- mirL 18 13
-----TCAAAGTGCTAACAGTGCAGGTA----- mirL 23 12
-----TCAAAGTGCTAACAGTGCAGG----- mirL 21 9
---AAAGTGCTAACAGTGCAGGTAGCTT----- mirL 25 8
-----AAGTGCTAACAGTGCAGGT----- mirL 19 6
---TGTCAAAGTGCTAACAGTGCAGGTA----- mirL 25 5
-----AAGTGCTAACAGTGCAGG----- mirL 18 3
-----GTCAAAGTGCTAACAGTG----- mirL 18 3
-----AGTGCTAACAGTGCAGGTAGC----- mirL 21 2
---GTCAAAGTGCTAACAGTGCAGGT----- mirL 23 2
-----AAGTGCTAACAGTGCAGGTAGCT----- mirL 23 1
-----TCAAAGTGCTAACAGTGC----- mirL 18 1
---TGTCAAAGTGCTAACAGTGCA----- mirL 21 1
-----TCAAAGTGCTAACAGTGCA----- mirL 19 1
-----ACTGCAGTGCCAGCACTTCTTAC----- mirR 23 1099
-----ACTGCAGTGCCAGCACTTCTT----- mirR 21 374
-----ACTGCAGTGCCAGCACTTCTTA----- mirR 22 304
-----ACTGCAGTGCCAGCACTTCTTACA----- mirR 24 218
-----ACTGCAGTGCCAGCACTTCT----- mirR 20 131
-----TACTGCAGTGCCAGCACTTCTT----- mirR 22 57
-----TACTGCAGTGCCAGCACTTCTTA----- mirR 23 40

```



```

-----CTGCAGTGCCAGCACTTCTTAC----- mirR 22 37
-----ACTGCAGTGCCAGCACTTC----- mirR 19 33
-----TACTGCAGTGCCAGCACTTCT----- mirR 21 28
-----CTGCAGTGCCAGCACTTCTTA----- mirR 21 17
-----ACTGCAGTGCCAGCACTT----- mirR 18 13
-----TACTGCAGTGCCAGCACTTCTTACA----- mirR 25 10
-----TACTGCAGTGCCAGCACTTC----- mirR 20 7
-----CTGCAGTGCCAGCACTTCTTACA----- mirR 23 6
-----CTGCAGTGCCAGCACTTCTT----- mirR 20 2
-----TACTGCAGTGCCAGCACTTCTTAC----- mirR 24 2
-----TACTGCAGTGCCAGCACTT----- mirR 19 1
-----CTACTGCAGTGCCAGCACTTCTT----- mirR 23 1
-----TGCAGTGCCAGCACTTCTTAC----- mirR 21 1
-----GCAGTGCCAGCACTTCTT----- mirR 18 1
-----ATTACCATGGTGATTTAATCAGAGGC----- morR 26 2
-----ACCATGGTGATTTAATCAG----- morR 19 2
-----CATTACCATGGTGATTTAATCAGAGGCCG----- morR 29 1
-----ATTACCATGGTGATTTAATCAGAGGCCGC----- morR 29 1
-----ACATTACCATGGTGATTT----- morR 18 1
-----ATTACCATGGTGATTTAATCAGAGGCCGCTGAG morR 33 1

```

>mmu-mir-425

```

ACAGCATGGAAAGTGCTTTGGAATGACACGATCACTCCCGTTGAGTGGGCACCCAAGAAGCCATCGGGAATGTCGTGTCCGCCAGTGCTCTTTTCGGCACCTCCCAAACAGGGCCTCATAGCCCC species len r
ACAGCATGGAAAGTGCTT----- morL 18 1
-CAGCATGGAAAGTGCTTT----- morL 18 1
ACAGCATGGAAAGTGCTTT----- morL 19 1
-----AATGACACGATCACTCCCGTTGA----- mirL 23 37104
-----AATGACACGATCACTCCCGTTG----- mirL 22 17169
-----AATGACACGATCACTCCCGTTGAGT----- mirL 25 9852
-----AATGACACGATCACTCCCGTTGAG----- mirL 24 5439
-----AATGACACGATCACTCCCGTTGAGTG----- mirL 26 1003
-----AATGACACGATCACTCCCGTT----- mirL 21 1001
-----ATGACACGATCACTCCCGTTGAGT----- mirL 24 764
-----ATGACACGATCACTCCCGTTGA----- mirL 22 495
-----AATGACACGATCACTCCCGT----- mirL 20 430
-----GACACGATCACTCCCGTTGA----- mirL 20 253
-----TGACACGATCACTCCCGTTGAGT----- mirL 23 177
-----ATGACACGATCACTCCCGTTGAG----- mirL 23 107
-----ATGACACGATCACTCCCGTTG----- mirL 21 90
-----ATGACACGATCACTCCCGTTGAGTG----- mirL 25 90
-----TGACACGATCACTCCCGTTGA----- mirL 21 89
-----GACACGATCACTCCCGTTG----- mirL 19 71
-----GAATGACACGATCACTCCCGTTGA----- mirL 24 28
-----GACACGATCACTCCCGTTGAGT----- mirL 22 21
-----TGACACGATCACTCCCGTTG----- mirL 20 17
-----GACACGATCACTCCCGTTGAGTG----- mirL 23 13

```

```

-----TGACACGATCACTCCCGT----- mirL 18 12
-----GACACGATCACTCCCGTTGAG----- mirL 21 12
-----TGACACGATCACTCCCGTTGAGTG----- mirL 24 11
-----GAATGACACGATCACTCCCGTTGAG----- mirL 25 10
-----GAATGACACGATCACTCCCGTTG----- mirL 23 10
-----GAATGACACGATCACTCCC----- mirL 19 9
-----ATGACACGATCACTCCCG----- mirL 18 8
-----TGACACGATCACTCCCGTTGAG----- mirL 22 6
-----ATGACACGATCACTCCCGT----- mirL 19 5
-----TGACACGATCACTCCCGTT----- mirL 19 4
-----GACACGATCACTCCCGTT----- mirL 18 3
-----GGAATGACACGATCACTC----- mirL 18 2
-----GGAATGACACGATCACTCCCGTTGA----- mirL 25 2
-----GAATGACACGATCACTCCCGTT----- mirL 22 2
-----GGAATGACACGATCACTCC----- mirL 19 2
-----GAATGACACGATCACTCC----- mirL 18 2
-----GACACGATCACTCCCGTTGAGTGG----- mirL 24 1
-----GAATGACACGATCACTCCCGTTGAGTGG----- mirL 28 1
-----CTTTCGGCACCTCCCAAA----- mirR 18 11042
-----CTTTCGGCACCTCCCAAAC----- mirR 19 7456
-----TTTTCGGCACCTCCCAAAC----- mirR 18 1685
-----CTTTCGGCACCTCCCAAACA----- mirR 20 41
-----GCTCTTTCGGCACCTCCCA----- mirR 19 37
-----TCTTTCGGCACCTCCCAAA----- mirR 19 8
-----TTTTCGGCACCTCCCAAACA----- mirR 19 7
-----CTTTCGGCACCTCCCAAACAG----- mirR 21 6
-----GCTCTTTCGGCACCTCCC----- mirR 18 5
-----GCTCTTTCGGCACCTCCCAAA----- mirR 21 4
-----CTTTCGGCACCTCCCAAACAGG----- mirR 22 4
-----GCTCTTTCGGCACCTCCCAA----- mirR 20 4
-----CTCTTTCGGCACCTCCCA----- mirR 18 4
-----TTCGGCACCTCCCAAACA----- mirR 18 3
-----TCTTTCGGCACCTCCCAAAC----- mirR 20 3
-----TCTTTCGGCACCTCCCAA----- mirR 18 2
-----AAACAGGCCTCATAGCCC----- morR 19 1
-----ACAGGCCTCATAGCCC----- morR 18 1

```

>mmu-mir-181b-2

```

AGGAAACATTGATGGCTGCACTCAACATTCATGCTGTGCGTGGGTTTGAATGTCAACCAACTCACTGATCAATGAATGCAAACCTGCGGGCCAAAAACGCAAAG species len reads
AGGAAACATTGATGGCTGCACTC----- morL 23 8
--GAAACATTGATGGCTGCACTC----- morL 22 1
--GAAACATTGATGGCTGCAC----- morL 19 1
--ATGATGGCTGCACTCAA----- morL 18 1
--AACATTGATGGCTGCACT----- morL 18 1
--ACATTGATGGCTGCACTC----- morL 18 1
--CATTGATGGCTGCACTCA----- morL 18 1

```

```

-----AACATTCATTGCTGTCGGTGGGT----- mirL 24 33981
-----AACATTCATTGCTGTCGGTGGGTTT----- mirL 25 20627
-----AACATTCATTGCTGTCGGTGGGT----- mirL 23 19553
-----AACATTCATTGCTGTCGGTGGGTTT----- mirL 26 10038
-----AACATTCATTGCTGTCGGTGGG----- mirL 22 2197
-----AACATTCATTGCTGTCGGTGGGTTTGA----- mirL 27 1450
-----ACATTCATTGCTGTCGGTGGGTTT----- mirL 24 1055
-----ACATTCATTGCTGTCGGTGGGTT----- mirL 23 1026
-----AACATTCATTGCTGTCGGTGG----- mirL 21 893
-----ACATTCATTGCTGTCGGTGGGTTT----- mirL 25 630
-----ACATTCATTGCTGTCGGTGGGT----- mirL 22 439
-----CAACATTCATTGCTGTCGGTGGGT----- mirL 24 91
-----ACATTCATTGCTGTCGGTGGGTTTGA----- mirL 26 77
-----CAACATTCATTGCTGTCGGTGGGTT----- mirL 25 61
-----ATTCATTGCTGTCGGTGGGTT----- mirL 21 34
-----CAACATTCATTGCTGTCGGTGGGTTT----- mirL 26 32
-----ACATTCATTGCTGTCGGTGGG----- mirL 21 32
-----ACATTCATTGCTGTCGGTGGGTTTGA----- mirL 27 26
-----CATTGCTGTCGGTGGGTTT----- mirL 24 26
-----TCAACATTCATTGCTGTCGGTGGGT----- mirL 25 17
-----CATTGCTGTCGGTGGGTTTGA----- mirL 25 17
-----ATTCATTGCTGTCGGTGGGT----- mirL 20 14
-----CATTGCTGTCGGTGGGTT----- mirL 22 9
-----CATTGCTGTCGGTGGGTTT----- mirL 23 9
-----CAACATTCATTGCTGTCGGTGGG----- mirL 23 8
-----CAACATTCATTGCTGTCGGTGGGTTT----- mirL 27 5
-----CATTGCTGTCGGTGGGT----- mirL 21 4
-----CAACATTCATTGCTGTCGGTGG----- mirL 22 3
-----ATTCATTGCTGTCGGTGGGTTT----- mirL 23 3
-----TCAACATTCATTGCTGTCGGTGGGTTT----- mirL 28 2
-----CAACATTCATTGCTGTCGGTGGGTTTGA----- mirL 28 1
-----ATTCATTGCTGTCGGTGGG----- mirL 19 1
-----ATTCATTGCTGTCGGTGGGTTT----- mirL 22 1
-----TCAACATTCATTGCTGTCGGTGGGTT----- mirL 26 1
-----GTTTGAATGTCAACCAAC----- loop 18 1
-----CTCACTGATCAATGAATGCAA----- mirR 21 409
-----CTCACTGATCAATGAATGCAAA----- mirR 22 405
-----CTCACTGATCAATGAATGCA----- mirR 20 244
-----ACTCACTGATCAATGAATGCAA----- mirR 22 210
-----ACTCACTGATCAATGAATGCA----- mirR 21 75
-----CTCACTGATCAATGAATGCAAA----- mirR 23 46
-----ACTCACTGATCAATGAATGCAAA----- mirR 23 27
-----AACTCACTGATCAATGAATGCA----- mirR 22 25
-----CTCACTGATCAATGAATGC----- mirR 19 12
-----ACTCACTGATCAATGAATGCAAA----- mirR 24 8
-----CAACTCACTGATCAATGAATGCA----- mirR 23 7

```

```

-----AACTCACTGATCAATGAATGCAA----- mirR 23 4
-----ACTCACTGATCAATGAATGC----- mirR 20 2
-----CAACTCACTGATCAATGA----- mirR 18 1
-----CACTGATCAATGAATGCAAA----- mirR 20 1
-----TCACTGATCAATGAATGCAAA----- mirR 21 1
-----CAACTCACTGATCAATGAATGCAA----- mirR 24 1
-----CTCACTGATCAATGAATG----- mirR 18 1
-----AACTCACTGATCAATGAA----- mirR 18 1
-----CTCACTGATCAATGAATGCAAACTGC----- mirR 26 1
-----GCGGGCCAAAAAACGCAAA----- morR 19 5
-----GCGGGCCAAAAAACGCAA----- morR 18 3
-----AACTGCGGGCCAAAAAAC----- morR 18 2
-----GCGGGCCAAAAAACGCAAAG morR 20 1

>mmu-mir-382
TGCTTTTCTGTGGTACTTGAAGAGAAGTTGTCGTGGTGGATTTCGCTTTACTTGTGACGAATCATTCACGGACAACACTTTTTTCAGTACCAAATGCTACCTCTAAGGATT species len reads
-----TCTGTGGTACTTGAAGAGA----- morL 19 1
---TTTTCTGTGGTACTTGAA----- morL 18 1
TGCTTTTCTGTGGTACTTGAAGA----- morL 23 1
---TTTTCTGTGGTACTTGAAGAG----- morL 21 1
---TTCTGTGGTACTTGAAGA----- morL 18 1
---TTTTCTGTGGTACTTGAAGA----- morL 20 1
---TTTCTGTGGTACTTGAAGA----- morL 19 1
---TTTCTGTGGTACTTGAAG----- morL 18 1
---TTCTGTGGTACTTGAAGAG----- morL 19 1
-----GAAGTTGTTTCGTGGTGGATTTCG----- mirL 22 39022
-----GAAGTTGTTTCGTGGTGGATTTCGC----- mirL 23 9344
-----GAAGTTGTTTCGTGGTGGATTTC----- mirL 21 6709
-----GAAGTTGTTTCGTGGTGGATT----- mirL 20 5317
-----AGTTGTTTCGTGGTGGATTTCGCT----- mirL 22 2375
-----AAGTTGTTTCGTGGTGGATTTCG----- mirL 21 1584
-----GAAGTTGTTTCGTGGTGGATT----- mirL 19 951
-----GAAGTTGTTTCGTGGTGGATTTCGCT----- mirL 24 761
-----AAGTTGTTTCGTGGTGGATTTCGC----- mirL 22 604
-----GAAGTTGTTTCGTGGTGGATT----- mirL 18 488
-----AGTTGTTTCGTGGTGGATTTCGC----- mirL 21 266
-----AGTTGTTTCGTGGTGGATTTCGCTTT----- mirL 24 257
-----AGTTGTTTCGTGGTGGATTTCGCTT----- mirL 23 230
-----AGTTGTTTCGTGGTGGATTTCG----- mirL 20 192
-----AAGTTGTTTCGTGGTGGATTTC----- mirL 20 177
-----AGTTGTTTCGTGGTGGATTTC----- mirL 19 125
-----AGTTGTTTCGTGGTGGATTTCGCTTTA----- mirL 25 96
-----AAGTTGTTTCGTGGTGGATTTC----- mirL 19 84
-----AAGTTGTTTCGTGGTGGATTTCGCT----- mirL 23 69
-----AAGTTGTTTCGTGGTGGATTTCGCTT----- mirL 24 49
-----AAGTTGTTTCGTGGTGGATTTC----- mirL 18 29

```

```

-----AGAAGTTGTTTCGTGGTGGATTTC----- mirL 23 22
-----GTTGTTTCGTGGTGGATTTC----- mirL 18 15
-----AGAAGTTGTTTCGTGGTGGATTTC----- mirL 22 12
-----AGAGAAGTTGTTTCGTGGTGGT----- mirL 19 8
-----GTTGTTTCGTGGTGGATTTCGC----- mirL 20 4
-----GTTGTTTCGTGGTGGATTTCG----- mirL 19 4
-----AGAAGTTGTTTCGTGGTGGATT----- mirL 21 2
-----GTTGTTTCGTGGTGGATTTCGCT----- mirL 21 1
-----AGAGAAGTTGTTTCGTGGTGGAT----- mirL 22 1
-----AGAGAAGTTGTTTCGTGGT----- mirL 18 1
-----AGAAGTTGTTTCGTGGTGGATTTCGC----- mirL 24 1
-----AGAAGTTGTTTCGTGGTGGAT----- mirL 20 1
-----GCTTTACTTGTGACGAAT----- loop 18 7
-----AATCATTCACGGACAACACTTT----- mirR 22 15422
-----AATCATTCACGGACAACACTT----- mirR 21 3544
-----AATCATTCACGGACAACACTTTT----- mirR 23 1164
-----AATCATTCACGGACAACACT----- mirR 20 719
-----ATCATTCACGGACAACACTTT----- mirR 21 643
-----TCATTCACGGACAACACTTTTT----- mirR 22 276
-----ATCATTCACGGACAACACTTTT----- mirR 22 173
-----AATCATTCACGGACAACACTTTTT----- mirR 24 138
-----ATCATTCACGGACAACACTT----- mirR 20 122
-----CGAATCATTCACGGACAACACTT----- mirR 23 109
-----AATCATTCACGGACAACA----- mirR 18 82
-----TCATTCACGGACAACACTTTT----- mirR 21 71
-----ATCATTCACGGACAACACT----- mirR 19 55
-----ATCATTCACGGACAACACTTTTT----- mirR 23 48
-----TCATTCACGGACAACACTT----- mirR 19 40
-----TCATTCACGGACAACACTTT----- mirR 20 32
-----CATTCACGGACAACACTT----- mirR 18 30
-----AATCATTCACGGACAACAC----- mirR 19 29
-----CGAATCATTCACGGACAACACT----- mirR 22 21
-----ATCATTCACGGACAACACTTTTTTC----- mirR 25 15
-----TCATTCACGGACAACACT----- mirR 18 14
-----GAATCATTCACGGACAACACTTT----- mirR 23 9
-----CGAATCATTCACGGACAACACTTT----- mirR 24 9
-----CATTCACGGACAACACTTT----- mirR 19 8
-----GAATCATTCACGGACAACACTT----- mirR 22 4
-----GAATCATTCACGGACAACACT----- mirR 21 4
-----ATCATTCACGGACAACAC----- mirR 18 3
-----GAATCATTCACGGACAACAC----- mirR 20 2
-----ACGAATCATTCACGGACAACACTTT----- mirR 25 1
-----CATTCACGGACAACACTTTTT----- mirR 21 1
-----CGAATCATTCACGGACAACACTTTT----- mirR 25 1
-----TTCAGTACCAAATGCTACC----- morR 19 31
-----TTCAGTACCAAATGCTACCTCTAAGG--- morR 27 4

```

```

-----TCAGTACCAAATGCTACCT----- morR 19 1
-----TTTCAGTACCAAATGCTACCT----- morR 21 1
-----TTTCAGTACCAAATGCTACCTCTAAGGATT morR 30 1

>mmu-mir-128-2
CAGCCACTGTGCAGTGGGAAGGGGGCCGATGCACTGTAAGAGAGTGAGTAGCAGGTCTCACAGTGAACCGGTCTCTTTCCCTACTGTGTCAAACCTCC species len reads
-AGCCACTGTGCAGTGGGA----- morL 18 6
---CCACTGTGCAGTGGGAAG----- morL 18 2
CAGCCACTGTGCAGTGGG----- morL 18 2
--GCCACTGTGCAGTGGGAA----- morL 18 1
-----AGGGGGCCGATGCACTG----- mirL 18 44
-----GGGGCCGATGCACTGTAAGA----- mirL 21 39
-----GGGGCCGATGCACTGTAAGAGA----- mirL 23 8
-----GGGGCCGATGCACTGTAAG----- mirL 20 4
-----GGGGCCGATGCACTGTAAGAG----- mirL 22 2
-----GGGGCCGATGCACTGTAAGAGA----- mirL 22 2
-----GGGGCCGATGCACTGTAAGAGAGT----- mirL 25 1
-----GGGGCCGATGCACTGTAAGAGAG----- mirL 24 1
-----GGGGGGCCGATGCACTGTA----- mirL 19 1
-----GGGGCCGATGCACTGTAA----- mirL 19 1
-----GGGGCCGATGCACTGTAAG----- mirL 19 1
-----AGAGAGTGAGTAGCAGGT----- loop 18 3
-----TCACAGTGAACCGGTCTCTTT----- mirR 21 66688
-----TCACAGTGAACCGGTCTCTTTC----- mirR 22 13615
-----TCACAGTGAACCGGTCTCTT----- mirR 20 3296
-----TCACAGTGAACCGGTCTCTTTCC----- mirR 23 2172
-----CACAGTGAACCGGTCTCTTT----- mirR 20 1334
-----GTCTCACAGTGAACCGGT----- mirR 18 995
-----TCACAGTGAACCGGTCTCT----- mirR 19 803
-----TCACAGTGAACCGGTCTCTTTCCC----- mirR 24 388
-----TCACAGTGAACCGGTCTCT----- mirR 18 251
-----CACAGTGAACCGGTCTCTTTC----- mirR 21 209
-----CACAGTGAACCGGTCTCTT----- mirR 19 70
-----ACAGTGAACCGGTCTCTTT----- mirR 19 62
-----CTCACAGTGAACCGGTCTCTTT----- mirR 22 57
-----CACAGTGAACCGGTCTCTTTCC----- mirR 22 49
-----CACAGTGAACCGGTCTCT----- mirR 18 42
-----CAGTGAACCGGTCTCTTTC----- mirR 19 32
-----CAGTGAACCGGTCTCTTT----- mirR 18 23
-----GTCTCACAGTGAACCGGT----- mirR 19 21
-----TCTCACAGTGAACCGGTCTCTTT----- mirR 23 17
-----ACAGTGAACCGGTCTCTTTC----- mirR 20 15
-----ACAGTGAACCGGTCTCTT----- mirR 18 14
-----CACAGTGAACCGGTCTCTTTCCC----- mirR 23 4
-----TCTCACAGTGAACCGGT----- mirR 18 4
-----CTCACAGTGAACCGGTCTCTT----- mirR 21 4

```

```
-----CTCACAGTGAACCGGTCTCTTTC----- mirR 23 3
-----TCTCACAGTGAACCGGTCTCT----- mirR 21 3
-----GTCTCACAGTGAACCGGTCT----- mirR 20 2
-----ACAGTGAACCGGTCTCTTTC----- mirR 21 2
-----TCTCACAGTGAACCGGTCTCT----- mirR 22 2
-----CTCACAGTGAACCGGTCTC----- mirR 19 2
-----CTCACAGTGAACCGGTCT----- mirR 18 1
-----CCCTACTGTGTCAAACCTCC morR 19 3
-----TCCCTACTGTGTCAAACCT-- morR 18 1
-----TTCCCTACTGTGTCAAAC--- morR 18 1
-----TTTCCCTACTGTGTCAA--- morR 18 1
-----CCCTACTGTGTCAAACCTC- morR 18 1

>mmu-let-7i
GGTCCGCCGGCTCCCACACCATGGCCCTGGCTGAGGTAGTAGTTTGTGCTGTTGGTCGGGTTGTGACATTGCCCGCTGTGGAGATAACTGCGCAAGCTACTGCCTTGCTAGTGCTGGTGATGCTCAGCGCCGGGAGGAC
-----GCTCCCACACCATGGCCCTGGC-----
-----CCGGCTCCCACACCATGGCCCTGGC-----
-----CCCACACCATGGCCCTGGC-----
-----CTCCCACACCATGGCCCTGGC-----
-----CCACACCATGGCCCTGGC-----
-----GCTCCCACACCATGGCCCTGG-----
-----GCTCCCACACCATGGCCCTGGCT-----
-----CGGCTCCCACACCATGGCCCTGGC-----
-----CCACACCATGGCCCTGG-----
-----CCCACACCATGGCCCTGGCT-----
-----CTCCCACACCATGGCCCTGGCT-----
-----CGCCGGCTCCCACACCATGGCCCTGG-----
GGTCCGCCGGCTCCCACACCATGGCCCTGGC-----
-----TCCCACACCATGGCCCTG-----
-----GGCTCCCACACCATGGCCCTGGCT-----
-----GGCTCCCACACCATGGCCCTGG-----
-----CCACACCATGGCCCTGGCT-----
-----CACACCATGGCCCTGGCT-----
-----TGAGGTAGTAGTTTGTGCTGTT-----
-----TGAGGTAGTAGTTTGTGCTGTTG-----
-----TGAGGTAGTAGTTTGTGCTGT-----
-----TGAGGTAGTAGTTTGTGCTG-----
-----TGAGGTAGTAGTTTGTGCTGTTGG-----
-----GAGGTAGTAGTTTGTGCTGTTG-----
-----GAGGTAGTAGTTTGTGCTGTT-----
-----TGAGGTAGTAGTTTGTGCT-----
-----TGAGGTAGTAGTTTGTGCTGTTGGT-----
-----GAGGTAGTAGTTTGTGCTGT-----
-----GAGGTAGTAGTTTGTGCTGTTGG-----
-----GAGGTAGTAGTTTGTGCTG-----
-----GAGGTAGTAGTTTGTGCTG-----
```

-----GAGGTAGTAGTTTGTGCTGTTGGT-----  
-----CTGAGGTAGTAGTTTGTGCTG-----  
-----CTGAGGTAGTAGTTTGTGCTGT-----  
-----GGTAGTAGTTTGTGCTGTT-----  
-----AGGTAGTAGTTTGTGCTG-----  
-----AGGTAGTAGTTTGTGCTGTT-----  
-----GGTAGTAGTTTGTGCTGTTG-----  
-----GCTGAGGTAGTAGTTTGTGCTGTTG-----  
-----AGGTAGTAGTTTGTGCTGTTG-----  
-----GCTGAGGTAGTAGTTTGTGCTG-----  
-----GGTAGTAGTTTGTGCTGT-----  
-----CTGAGGTAGTAGTTTGTGCTGTTG-----  
-----GCTGAGGTAGTAGTTTGTGCTGTT-----  
-----CTGAGGTAGTAGTTTGTGCTGTT-----  
-----GGTAGTAGTTTGTGCTGTTGG-----  
-----CTGAGGTAGTAGTTTGTG-----  
-----CTGAGGTAGTAGTTTGTGCT-----  
-----GCTGAGGTAGTAGTTTGTGCTGT-----  
-----GGCTGAGGTAGTAGTTTGTGCTGTTG-----  
-----CTGAGGTAGTAGTTTGTGCT-----  
-----GGTCGGGTTGTGACATTGCCCGCTGTGGAGATAAC-----  
-----GGTCGGGTTGTGACATTGCCCGCTGTGGAGATA-----  
-----GGTCGGGTTGTGACATTGCCCGCTGTGGAGAT-----  
-----TGGTCGGGTTGTGACATTGCCCGCTGTGGAGAT-----  
-----GGTCGGGTTGTGACATTGCCCGCTGTGGAGA-----  
-----CTGCGCAAGCTACTGCCTTGCT-----  
-----CTGCGCAAGCTACTGCCTTGCTA-----  
-----CTGCGCAAGCTACTGCCTTGC-----  
-----CTGCGCAAGCTACTGCCTTGCTAG-----  
-----CTGCGCAAGCTACTGCCTTGCTAGT-----  
-----CTGCGCAAGCTACTGCCTTG-----  
-----CTGCGCAAGCTACTGCCT-----  
-----TGCGCAAGCTACTGCCTTGCT-----  
-----TGCGCAAGCTACTGCCTTGCTAG-----  
-----TGCGCAAGCTACTGCCTTGCTA-----  
-----TGCGCAAGCTACTGCCTTGC-----  
-----GCGCAAGCTACTGCCTTGCT-----  
-----GCGCAAGCTACTGCCTTG-----  
-----GCGCAAGCTACTGCCTTGCTAG-----  
-----TGCGCAAGCTACTGCCTTG-----  
-----ACTGCGCAAGCTACTGCCTTG-----  
-----AACTGCGCAAGCTACTGCCTTGCT-----  
-----TGCGCAAGCTACTGCCTTGCTAGT-----  
-----TAGTGCTGGTGATGCTCAGCGCCGCGGAGGAC-----  
-----TAGTGCTGGTGATGCTCAGCGCCGCGGAGGA-----  
-----TAGTGCTGGTGATGCTCAGCGC-----



```

-----TAGTGCTGGTGATGCTCAGCG-----
-----AGTGCTGGTGATGCTCAGCGC-----
-----TAGTGCTGGTGATGCTCAGCGCCGCG-----
-----TAGTGCTGGTGATGCTCAGCGCC-----
-----TAGTGCTGGTGATGCTCAGCGCCGCGGA-----
-----TGCTGGTGATGCTCAGCGC-----
-----GCTAGTGCTGGTGATGCT-----
-----GTGCTGGTGATGCTCAGC-----
-----GCTAGTGCTGGTGATGCTC-----
-----AGTGCTGGTGATGCTCAGC-----
-----AGTGCTGGTGATGCTCAG-----
-----TGCTGGTGATGCTCAGCGCC-----
-----TGCTGGTGATGCTCAGCG-----
-----GTGCTGGTGATGCTCAGCG-----

```

>mmu-mir-129-2

| Species | len | reads |
|---------|-----|-------|
| morL    | 18  | 6     |
| morL    | 20  | 1     |
| mirL    | 21  | 8276  |
| mirL    | 22  | 7053  |
| mirL    | 20  | 1244  |
| mirL    | 23  | 646   |
| mirL    | 24  | 141   |
| mirL    | 18  | 92    |
| mirL    | 19  | 82    |
| mirL    | 21  | 38    |
| mirL    | 19  | 24    |
| mirL    | 23  | 20    |
| mirL    | 20  | 15    |
| mirL    | 19  | 14    |
| mirL    | 20  | 14    |
| mirL    | 22  | 14    |
| mirL    | 19  | 9     |
| mirL    | 23  | 8     |
| mirL    | 18  | 3     |
| mirL    | 24  | 2     |
| mirL    | 22  | 2     |
| mirL    | 18  | 2     |
| mirL    | 24  | 1     |
| mirL    | 18  | 1     |
| mirL    | 24  | 1     |
| loop    | 21  | 30    |
| loop    | 22  | 3     |
| loop    | 20  | 1     |
| loop    | 19  | 1     |

```

-----AAGCCCTTACCCCAAAAAGCAT----- mirR 22 49030
-----AAGCCCTTACCCCAAAAAGCA----- mirR 21 11502
-----AAGCCCTTACCCCAAAAAGCATT----- mirR 23 5344
-----AAGCCCTTACCCCAAAAAGC----- mirR 20 1616
-----AGCCCTTACCCCAAAAAGCATT----- mirR 22 1127
-----AAGCCCTTACCCCAAAAAGCATTC----- mirR 24 709
-----AGCCCTTACCCCAAAAAGCAT----- mirR 21 411
-----GAAGCCCTTACCCCAAAAAGCA----- mirR 22 364
-----AGCCCTTACCCCAAAAAGCATTC----- mirR 23 267
-----GGAAGCCCTTACCCCAAAAAGCA----- mirR 23 222
-----AAGCCCTTACCCCAAAAAG----- mirR 19 104
-----AAGCCCTTACCCCAAAA----- mirR 18 91
-----GAAGCCCTTACCCCAAAAAGC----- mirR 21 90
-----GCCCTTACCCCAAAAAGCAT----- mirR 20 81
-----GGAAGCCCTTACCCCAAAAAGCAT----- mirR 24 58
-----GAAGCCCTTACCCCAAAAAGCAT----- mirR 23 50
-----AGCCCTTACCCCAAAAAGCA----- mirR 20 40
-----GGAAGCCCTTACCCCAAAAAGC----- mirR 22 33
-----CCCTTACCCCAAAAAGCAT----- mirR 19 32
-----GCCCTTACCCCAAAAAGCA----- mirR 19 15
-----GAAGCCCTTACCCCAAAAAG----- mirR 20 11
-----GGAAGCCCTTACCCCAAAA----- mirR 20 5
-----AGCCCTTACCCCAAAAAGC----- mirR 19 4
-----CCCTTACCCCAAAAAGCA----- mirR 18 3
-----GGAAGCCCTTACCCCAAAA----- mirR 19 3
-----GGAAGCCCTTACCCCAAAAAGCATT----- mirR 25 3
-----GGAAGCCCTTACCCCAAAA----- mirR 18 3
-----CGGAAGCCCTTACCCCAA----- mirR 18 2
-----AGCCCTTACCCCAAAAAG----- mirR 18 2
-----GAAGCCCTTACCCCAAAA----- mirR 18 2
-----CCCTTACCCCAAAAAGCATT----- mirR 20 1
-----GCCCTTACCCCAAAAAGCATTC----- mirR 22 1
-----GCCCTTACCCCAAAAAGCATT----- mirR 21 1
-----GAAGCCCTTACCCCAAAAAGCATT----- mirR 24 1
-----GAAGCCCTTACCCCAAAA----- mirR 19 1
-----GCGGAGGGCGCGCTCGGC morR 18 1
-----TCGCGGAGGGCGCGCTCGGC morR 20 1

```

>mmu-mir-181b-1

```

GTTTACAAAGGTCACAATCAACATTGCTGTGTCGGTGGGTTGAACTGTGTAGAAAAGCTCACTGAACAATGAATGCAACTGTGGCCCCGCTTTTGC species len reads
GTTTACAAAGGTCACAAT----- morL 18 4
-----ACAAGGTCACAATCAAC----- morL 18 2
-----AACATTCATTGCTGTGTCGGTGGGTT----- mirL 24 33979
-----AACATTCATTGCTGTGTCGGTGGGTT----- mirL 23 19553
-----AACATTCATTGCTGTGTCGGTGGGTTG----- mirL 25 15273
-----AACATTCATTGCTGTGTCGGTGGGTTGA----- mirL 26 7798

```

```
-----AACATTCATTGCTGTCGGTGGG----- mirL 22 2197
-----AACATTCATTGCTGTCGGTGGGTTGAA----- mirL 27 1598
-----ACATTCATTGCTGTCGGTGGGTT----- mirL 23 1026
-----AACATTCATTGCTGTCGGTGG----- mirL 21 893
-----ACATTCATTGCTGTCGGTGGGTTG----- mirL 24 579
-----ACATTCATTGCTGTCGGTGGGTT----- mirL 22 439
-----ACATTCATTGCTGTCGGTGGGTTGA----- mirL 25 284
-----CAACATTCATTGCTGTCGGTGGGTT----- mirL 24 91
-----CAACATTCATTGCTGTCGGTGGGTT----- mirL 25 61
-----ACATTCATTGCTGTCGGTGGGTTGAA----- mirL 26 55
-----CATTTCATTGCTGTCGGTGGGTTGA----- mirL 24 38
-----ATTCATTGCTGTCGGTGGGTT----- mirL 21 34
-----ACATTCATTGCTGTCGGTGGG----- mirL 21 32
-----CAACATTCATTGCTGTCGGTGGGTTG----- mirL 26 26
-----TCAACATTCATTGCTGTCGGTGGGTT----- mirL 25 17
-----ATTCATTGCTGTCGGTGGGTT----- mirL 20 14
-----ACATTCATTGCTGTCGGTGG----- mirL 20 13
-----ATTCATTGCTGTCGGTGGGTTGA----- mirL 23 10
-----CATTTCATTGCTGTCGGTGGGTT----- mirL 22 9
-----CAACATTCATTGCTGTCGGTGGG----- mirL 23 8
-----CATTTCATTGCTGTCGGTGGGTTG----- mirL 23 6
-----CATTTCATTGCTGTCGGTGGGTTGAA----- mirL 25 6
-----CATTTCATTGCTGTCGGTGGGTT----- mirL 21 4
-----CAACATTCATTGCTGTCGGTGG----- mirL 22 3
-----ATTCATTGCTGTCGGTGGGTTG----- mirL 22 3
-----ATTCATTGCTGTCGGTGGGTTGAA----- mirL 24 2
-----CAACATTCATTGCTGTCGGTGGGTTGAA----- mirL 28 2
-----CAACATTCATTGCTGTCGGTGGGTTGAAC----- mirL 29 2
-----TCAACATTCATTGCTGTCGGTGGGTT----- mirL 26 1
-----TCAACATTCATTGCTGTCGGTGGGTTGA----- mirL 28 1
-----ATTCATTGCTGTCGGTGGG----- mirL 19 1
-----GAACTGTGTAGAAAAGCT----- loop 18 1
-----CTCACTGAACAATGAATGCAA----- mirR 21 1784
-----CTCACTGAACAATGAATGCA----- mirR 20 627
-----CTCACTGAACAATGAATGCAAC----- mirR 22 77
-----CTCACTGAACAATGAATGC----- mirR 19 53
-----CTCACTGAACAATGAATGCAACT----- mirR 23 17
-----GCTCACTGAACAATGAATGCA----- mirR 21 11
-----AGCTCACTGAACAATGAATGCAA----- mirR 23 10
-----ACTGAACAATGAATGCAA----- mirR 18 4
-----TCACTGAACAATGAATGCAA----- mirR 20 2
-----CACTGAACAATGAATGCAA----- mirR 19 2
-----CTCACTGAACAATGAATG----- mirR 18 2
-----AGCTCACTGAACAATGAATGCAAC----- mirR 24 1
-----CACTGAACAATGAATGCAAC----- mirR 20 1
-----CACTGAACAATGAATGCA----- mirR 18 1
```

```

-----CTCACTGAACAATGAATGCAACTG----- mirR 24 1
-----GCTCACTGAACAATGAATGCAAC----- mirR 23 1
-----ACTGAACAATGAATGCAAC----- mirR 19 1
-----TGTGGCCCCGCTTTTTGC morR 18 1

>mmu-mir-193b
GGAGGCGGTGGGCCAGAATCGGGTTTTGAGGGCGAGATGAGTTTGTGTTTTATCCAAGTGGCCACAAAGTCCCGCTTTGGGGTCATCCTAACAGCAAAGGATTCAGGCC species len reads
GGAGGCGGTGGGCCAGA----- morL 18 1
-GAGGCGGTGGGCCAGAATC----- morL 20 1
--AGGCGGTGGGCCAGAAT----- morL 18 1
----CGGTGGGCCAGAATCGG----- morL 18 1
-GAGGCGGTGGGCCAGAAT----- morL 19 1
-----CGGGTTTTGAGGGCGAGATGA----- mirL 22 2866
-----CGGGTTTTGAGGGCGAGATG----- mirL 21 207
-----CGGGTTTTGAGGGCGAGATGAG----- mirL 23 90
-----CGGGTTTTGAGGGCGAGAT----- mirL 20 49
-----GGGGTTTTGAGGGCGAGATGA----- mirL 21 34
-----CGGGTTTTGAGGGCGAGA----- mirL 19 31
-----TCGGGGTTTTGAGGGCGAGATG----- mirL 22 18
-----TCGGGGTTTTGAGGGCGAGATGA----- mirL 23 16
-----CGGGTTTTGAGGGCGAGATGAGT----- mirL 24 16
-----GGGGTTTTGAGGGCGAGATGAGTT----- mirL 24 7
-----GGTTTTGAGGGCGAGATGA----- mirL 19 7
-----GGGGTTTTGAGGGCGAGATGAG----- mirL 22 4
-----TCGGGGTTTTGAGGGCGAGAT----- mirL 21 4
-----TCGGGGTTTTGAGGGCGAGATGAG----- mirL 24 2
-----GGGGTTTTGAGGGCGAGATG----- mirL 20 2
-----CGGGTTTTGAGGGCGAGATGAGTT----- mirL 25 1
-----GGGTTTTGAGGGCGAGATGA----- mirL 20 1
-----ATCGGGTTTTGAGGGCG----- mirL 18 1
-----TCGGGGTTTTGAGGGCGAGATGAGT----- mirL 25 1
-----GGGGTTTTGAGGGCGAGA----- mirL 18 1
-----GGTTTTGAGGGCGAGATG----- mirL 18 1
-----TCGGGGTTTTGAGGGCGAGA----- mirL 20 1
-----TGAGTTTGTGTTTTATCC----- loop 18 9
-----TGAGTTTGTGTTTTATCCAAC----- loop 21 5
-----TGAGTTTGTGTTTTATCCA----- loop 19 2
-----GAGTTTGTGTTTTATCCA----- loop 18 2
-----TGAGTTTGTGTTTTATCCA----- loop 20 1
-----AACTGGCCACAAAGTCCCGCT----- mirR 22 43188
-----AACTGGCCACAAAGTCCCGCTT----- mirR 23 17729
-----AACTGGCCACAAAGTCCCGCTTT----- mirR 24 8498
-----AACTGGCCACAAAGTCCCGC----- mirR 21 3395
-----AACTGGCCACAAAGTCC----- mirR 18 1999
-----AACTGGCCACAAAGTCCCG----- mirR 20 1944
-----AACTGGCCACAAAGTCCCGCTTT----- mirR 25 1864

```

```

-----ACTGCCCCACAAAGTCCCGCTT----- mirR 22 1575
-----ACTGCCCCACAAAGTCCCGCTTT----- mirR 23 801
-----ACTGCCCCACAAAGTCCCGCT----- mirR 21 571
-----ACTGCCCCACAAAGTCCCGCTTTT----- mirR 24 412
-----ACTGCCCCACAAAGTCCCGCTTTTG----- mirR 25 62
-----ACTGCCCCACAAAGTCCCG----- mirR 19 49
-----ACTGCCCCACAAAGTCCCGCTTTTGG----- mirR 26 44
-----CTGCCCCACAAAGTCCCGCTTT----- mirR 22 34
-----TGGCCCCACAAAGTCCCGCTTT----- mirR 21 21
-----CTGCCCCACAAAGTCCCGCT----- mirR 20 20
-----CAACTGCCCCACAAAGTCCCGCT----- mirR 23 20
-----TGGCCCCACAAAGTCCCGCT----- mirR 19 18
-----CCAACTGCCCCACAAAGTCCCGCT----- mirR 24 14
-----CTGCCCCACAAAGTCCCGCTT----- mirR 21 12
-----CCAACTGCCCCACAAAGTCCCGC----- mirR 23 9
-----CCAACTGCCCCACAAAGTCCCG----- mirR 22 7
-----CTGCCCCACAAAGTCCCGC----- mirR 19 4
-----CAACTGCCCCACAAAGTCCCGCTT----- mirR 24 4
-----TCCAACTGCCCCACAAAGTC----- mirR 20 2
-----CAACTGCCCCACAAAGTCCCGCTTT----- mirR 25 2
-----CCAACTGCCCCACAAAGTCC----- mirR 20 2
-----TGGCCCCACAAAGTCCCGC----- mirR 18 2
-----TCCAACTGCCCCACAAAGTCCCGCT----- mirR 25 2
-----CAACTGCCCCACAAAGTCCCG----- mirR 21 2
-----TCCAACTGCCCCACAAAGTCCCGCTT----- mirR 26 1
-----CTGCCCCACAAAGTCCCG----- mirR 18 1
-----CAACTGCCCCACAAAGTCC----- mirR 19 1
-----CAACTGCCCCACAAAGTCCCGC----- mirR 22 1
-----CCAACTGCCCCACAAAGTCCCGCTT----- mirR 25 1
-----TGGCCCCACAAAGTCCCGCTTT----- mirR 22 1
-----TGGGGTCATCCTAACAGC----- morR 18 504
-----TGGGGTCATCCTAACAGCA----- morR 19 39
-----GGGGTCATCCTAACAGCA----- morR 18 5
-----TGGGGTCATCCTAACAGCAAAG----- morR 22 1
-----GCTTTTGGGGTCATCCTA----- morR 18 1
-----TTTGGGGTCATCCTAACAGCAAAGGATTCAGGCC morR 34 1

```

>mmu-mir-134

```

CGGAAGAGATGTTGGTGCCAGCACCATTTCAGGGTGTGTGACTGGTTGACCAGAGGGGCGTGCACCTCTGTTACCCCTGTGGGCCACCTAGTCACCAACCCTCAGCATCAATTCCTC species len reads
-----AGCACCATTTCAGGGTGTGT----- morL 19 20
-----AGCACCATTTCAGGGTGTG----- morL 18 8
-----CAGCACCATTTCAGGGTGTGT----- morL 20 5
-----CAGCACCATTTCAGGGTGTG----- morL 19 3
-----GTGCCAGCACCATTTCAGG----- morL 18 1
CGGAAGAGATGTTGGTGCCAGCACCATTTCAGGGT----- morL 35 1
CGGAAGAGATGTTGGTGCCAGCACCATTTCAGGGT----- morL 34 1

```

```

-----TGTGACTGGTTGACCAGAGGGG----- mirL 22 44599
-----TGTGACTGGTTGACCAGAGGGGC----- mirL 23 13538
-----TGTGACTGGTTGACCAGAGGGG----- mirL 21 13352
-----TGTGACTGGTTGACCAGAGGGGGCG----- mirL 24 4953
-----TGTGACTGGTTGACCAGAGGGGCGT----- mirL 25 1744
-----TGTGACTGGTTGACCAGAGG----- mirL 20 1397
-----GTGACTGGTTGACCAGAGGGG----- mirL 21 881
-----GTGACTGGTTGACCAGAGGGGC----- mirL 22 718
-----TGTGACTGGTTGACCAGAG----- mirL 19 358
-----GTGACTGGTTGACCAGAGGGGCG----- mirL 23 348
-----GTGTGACTGGTTGACCAGAGGG----- mirL 22 254
-----GTGACTGGTTGACCAGAGGG----- mirL 20 227
-----GTGTGACTGGTTGACCAGAGGGG----- mirL 23 129
-----GTGACTGGTTGACCAGAGG----- mirL 19 108
-----GTGTGACTGGTTGACCAGAGGGGC----- mirL 24 75
-----GTGACTGGTTGACCAGAGGGGCGT----- mirL 24 54
-----GTGTGACTGGTTGACCAGAGG----- mirL 21 26
-----GTGTGACTGGTTGACCAGAGGGGCG----- mirL 25 25
-----GTGACTGGTTGACCAGAG----- mirL 18 18
-----GACTGGTTGACCAGAGGGG----- mirL 19 5
-----GTGTGACTGGTTGACCAGA----- mirL 19 4
-----TGACTGGTTGACCAGAGGGG----- mirL 20 3
-----GTGTGACTGGTTGACCAG----- mirL 18 2
-----GTGTGTGACTGGTTGACC----- mirL 18 1
-----TGACTGGTTGACCAGAGG----- mirL 18 1
-----CGTGCACTCTGTTACCC----- loop 18 13
-----CGTGCACTCTGTTACCCCT----- loop 19 8
-----GCGTGCACTCTGTTACCC----- loop 18 3
-----GCGTGCACTCTGTTACCC----- loop 19 2
-----TGCACCTCTGTTACCCCTG----- loop 18 2
-----GGCGTGCACTCTGTTACCC----- loop 21 1
-----GGCGTGCACTCTGTTACCC----- loop 20 1
-----GTGCACTCTGTTACCCCTG----- loop 19 1
-----CTGTGGGCCACCTAGTCACCAA----- mirR 22 1338
-----CTGTGGGCCACCTAGTCACCA----- mirR 21 514
-----CTGTGGGCCACCTAGTCACCAAC----- mirR 23 332
-----CCTGTGGGCCACCTAGTCACCAA----- mirR 23 187
-----CTGTGGGCCACCTAGTCACC----- mirR 20 108
-----TGTGGGCCACCTAGTCACCAAC----- mirR 22 100
-----CTGTGGGCCACCTAGTCACCAACC----- mirR 24 67
-----CCTGTGGGCCACCTAGTCACCA----- mirR 22 59
-----TGTGGGCCACCTAGTCACCAACC----- mirR 23 50
-----TGTGGGCCACCTAGTCACCAA----- mirR 21 33
-----CTGTGGGCCACCTAGTCAC----- mirR 19 28
-----CTGTGGGCCACCTAGTCA----- mirR 18 20
-----CCTGTGGGCCACCTAGTCACCAAC----- mirR 24 20

```

```

-----CCTGTGGGCCACCTAGTCACCAACC----- mirR 25 14
-----TGTGGGCCACCTAGTCACCA----- mirR 20 10
-----CCTGTGGGCCACCTAGTCACC----- mirR 21 10
-----GTGGGCCACCTAGTCACCA----- mirR 19 7
-----CCCTGTGGGCCACCTAGTCACCAA----- mirR 24 6
-----GTGGGCCACCTAGTCACCAAC----- mirR 21 6
-----GTGGGCCACCTAGTCACC----- mirR 18 3
-----GTGGGCCACCTAGTCACCAA----- mirR 20 3
-----TGTGGGCCACCTAGTCACC----- mirR 19 3
-----CCCTGTGGGCCACCTAGTCACCA----- mirR 23 3
-----ACCCTGTGGGCCACCTAG----- mirR 18 1
-----TGTGGGCCACCTAGTCACCAACCC----- mirR 24 1
-----CCTGTGGGCCACCTAGTCA----- mirR 19 1
-----CCCTGTGGGCCACCTAGTCACC----- mirR 22 1
-----TGGGCCACCTAGTCACCAA----- mirR 19 1
-----CCTGTGGGCCACCTAGTC----- mirR 18 1
-----TGGGCCACCTAGTCACCA----- mirR 18 1
-----CCCTGTGGGCCACCTAGT----- mirR 18 1
-----CCCTCAGCATCAATTCCACTC morR 21 1
-----ACCCTCAGCATCAATTCC---- morR 18 1
-----CCTCAGCATCAATTCCAC-- morR 18 1

```

>mmu-mir-181c

| Species | len | reads |
|---------|-----|-------|
| morL    | 19  | 2     |
| morL    | 26  | 2     |
| morL    | 18  | 2     |
| morL    | 20  | 1     |
| morL    | 22  | 1     |
| mirL    | 24  | 34476 |
| mirL    | 22  | 10290 |
| mirL    | 23  | 8377  |
| mirL    | 25  | 6911  |
| mirL    | 26  | 2574  |
| mirL    | 20  | 1009  |
| mirL    | 21  | 950   |
| mirL    | 23  | 198   |
| mirL    | 23  | 198   |
| mirL    | 24  | 177   |
| mirL    | 25  | 132   |
| mirL    | 23  | 72    |
| mirL    | 25  | 45    |
| mirL    | 22  | 22    |
| mirL    | 24  | 21    |
| mirL    | 21  | 20    |
| mirL    | 21  | 19    |

```

-----GAACATTCAACCTGTCGGTGAG----- mirL 22 17
-----GAACATTCAACCTGTCGGTGAGTTTG----- mirL 26 13
-----ATTCAACCTGTCGGTGAGTTTGG----- mirL 23 12
-----ACATTCAACCTGTCGGTGAGTT----- mirL 22 9
-----GGAACATTCAACCTGTCGGTGAGT----- mirL 24 8
-----ACATTCAACCTGTCGGTGA----- mirL 19 8
-----ATTCAACCTGTCGGTGAGTTT----- mirL 21 7
-----GAACATTCAACCTGTCGGTGAGTT----- mirL 24 4
-----GAACATTCAACCTGTCGGTG----- mirL 20 3
-----ATCAACCTGTCGGTGAGTTTG----- mirL 22 2
-----CATTCAACCTGTCGGTGA----- mirL 18 1
-----GGGAACATTCAACCTGTC----- mirL 18 1
-----CATTCAACCTGTCGGTGAGTT----- mirL 21 1
-----ACATTCAACCTGTCGGTG----- mirL 18 1
-----CATTCAACCTGTCGGTGAGT----- mirL 20 1
-----TGGGCAGCTCAGACAAAC----- loop 18 6
-----TTGGGCAGCTCAGACAAA----- loop 18 2
-----GGGCAGCTCAGACAAACC----- loop 18 1
-----TTTGGGCAGCTCAGACAA----- loop 18 1
-----ACCATCGACCGTTGAGTGGACC----- mirR 22 13482
-----ACCATCGACCGTTGAGTGGAC----- mirR 21 1910
-----ACCATCGACCGTTGAGTGGACCC----- mirR 23 1325
-----AACCATCGACCGTTGAGTGGAC----- mirR 22 1152
-----AACCATCGACCGTTGAGTGGGA----- mirR 21 595
-----ACCATCGACCGTTGAGTGGGA----- mirR 20 579
-----AACCATCGACCGTTGAGTGGACC----- mirR 23 311
-----ACCATCGACCGTTGAGTGGACCCC----- mirR 24 225
-----AACCATCGACCGTTGAGTGG----- mirR 20 93
-----ACCATCGACCGTTGAGTGG----- mirR 19 67
-----ACCATCGACCGTTGAGTGGACCCCG----- mirR 25 57
-----AACCATCGACCGTTGAGTGGACCC----- mirR 24 42
-----CCATCGACCGTTGAGTGGAC----- mirR 20 21
-----CCATCGACCGTTGAGTGGACC----- mirR 21 17
-----AACCATCGACCGTTGAGTGGACCCCG----- mirR 26 10
-----CCATCGACCGTTGAGTGGACCC----- mirR 22 7
-----ATCGACCGTTGAGTGGAC----- mirR 18 6
-----AAACCATCGACCGTTGAGTGG----- mirR 21 5
-----CATCGACCGTTGAGTGGAC----- mirR 19 4
-----AACCATCGACCGTTGAGTGGACCC----- mirR 25 3
-----AAACCATCGACCGTTGAGTGGGA----- mirR 22 2
-----ATCGACCGTTGAGTGGACCC----- mirR 20 1
-----CATCGACCGTTGAGTGGACCC----- mirR 21 1
-----CCATCGACCGTTGAGTGGGA----- mirR 19 1
-----CCCAGGCCTGGAAGTGC----- morR 18 25
-----CCGAGGCCTGGAAGTGCC----- morR 18 7
-----CCCAGGCCTGGAAGTGCC----- morR 19 4

```



```

-----AGGCCTGGAAGCTGCCACC morR 18 2
-----CGAGGCCTGGAAGCTGCCA-- morR 18 2
-----CCGAGGCCTGGAAGCTGCCAC- morR 20 2
-----GAGGCCTGGAAGCTGCCACC morR 19 1
-----CCGAGGCCTGGAAGCTGCCACC morR 21 1

>mmu-mir-101a
CTGACGGACACGGTGACTGACAGGCTGCCCTGGCTCAGTTATCACAGTGCTGATGCTGTCCATTCTAAAGGTACAGTACTGTGATAACTGAAGGATGGCAGCCATCTTGCCT species len reads
-----GACTGACAGGCTGCCCTGGCT----- morL 21 30
-----ACTGACAGGCTGCCCTGG----- morL 18 8
-----CTGACAGGCTGCCCTGGCT----- morL 19 4
-----ACTGACAGGCTGCCCTGGCT----- morL 20 3
-----GACTGACAGGCTGCCCTGGC----- morL 20 1
CTGACGGACACGGTGACTGACAGGCTGCCCTG----- morL 32 1
-----CAGTTATCACAGTGCTGATGCT----- mirL 22 891
-----CAGTTATCACAGTGCTGATGC----- mirL 21 443
-----TCAGTTATCACAGTGCTGATGC----- mirL 22 280
-----TCAGTTATCACAGTGCTGATGCT----- mirL 23 132
-----CAGTTATCACAGTGCTGATG----- mirL 20 55
-----TCAGTTATCACAGTGCTGATG----- mirL 21 50
-----CAGTTATCACAGTGCTGATGCTGTC----- mirL 25 32
-----CAGTTATCACAGTGCTGATGCTGT----- mirL 24 25
-----CAGTTATCACAGTGCTGATGCTG----- mirL 23 24
-----TCAGTTATCACAGTGCTGAT----- mirL 20 13
-----CAGTTATCACAGTGCTGAT----- mirL 19 13
-----TCAGTTATCACAGTGCTGATGCTG----- mirL 24 9
-----TCAGTTATCACAGTGCTG----- mirL 18 8
-----AGTTATCACAGTGCTGATGC----- mirL 20 5
-----GTTATCACAGTGCTGATGCT----- mirL 20 4
-----TTATCACAGTGCTGATGCTGTCCA----- mirL 24 4
-----TCAGTTATCACAGTGCTGA----- mirL 19 3
-----GTTATCACAGTGCTGATGCTGTCCATT----- mirL 27 2
-----AGTTATCACAGTGCTGATGCT----- mirL 21 1
-----CTCAGTTATCACAGTGCT----- mirL 18 1
-----AGTTATCACAGTGCTGATG----- mirL 19 1
-----AGTTATCACAGTGCTGATGCTGTC----- mirL 24 1
-----GCTGTCCATTCTAAAGGT----- loop 18 1
-----GTACAGTACTGTGATAACTGA----- mirR 21 29474
-----GTACAGTACTGTGATAACTGAA----- mirR 22 27100
-----TACAGTACTGTGATAACTGAAG----- mirR 22 10151
-----GTACAGTACTGTGATAACTGAAG----- mirR 23 7690
-----TACAGTACTGTGATAACTGAA----- mirR 21 2848
-----TACAGTACTGTGATAACTGA----- mirR 20 2042
-----TACAGTACTGTGATAACTGAAGG----- mirR 23 974
-----GTACAGTACTGTGATAACTGAAGG----- mirR 24 831
-----GTACAGTACTGTGATAACTG----- mirR 20 609

```

```

-----GTACAGTACTGTGATAACT----- mirR 19 363
-----ACAGTACTGTGATAAAG----- mirR 21 333
-----ACAGTACTGTGATAAAG----- mirR 20 157
-----TACAGTACTGTGATAAAGGA----- mirR 24 146
-----GTACAGTACTGTGATAAAG----- mirR 18 116
-----ACAGTACTGTGATAAAG----- mirR 19 83
-----ACAGTACTGTGATAAAG----- mirR 22 64
-----TACAGTACTGTGATAAAG----- mirR 19 58
-----TACAGTACTGTGATAAAG----- mirR 18 53
-----CAGTACTGTGATAAAG----- mirR 20 39
-----GGTACAGTACTGTGATAAAG----- mirR 22 23
-----ACAGTACTGTGATAAAGGA----- mirR 23 20
-----CAGTACTGTGATAAAG----- mirR 18 19
-----ACAGTACTGTGATAAAG----- mirR 18 12
-----CAGTACTGTGATAAAG----- mirR 19 11
-----GGTACAGTACTGTGATAAAG----- mirR 23 10
-----AAGGTACAGTACTGTGATAAAG----- mirR 24 4
-----CAGTACTGTGATAAAG----- mirR 21 3
-----CAGTACTGTGATAAAGGA----- mirR 22 3
-----AGGTACAGTACTGTGATAA----- mirR 19 2
-----AGGTACAGTACTGTGATAAAG----- mirR 24 1
-----GGTACAGTACTGTGATAAAG----- mirR 24 1
-----AGGTACAGTACTGTGATAAAG----- mirR 25 1
-----ATGGCAGCCATCTTGCC morR 18 1
-----GAAGGATGGCAGCCATCTT---- morR 19 1
-----GAAGGATGGCAGCCATCT---- morR 18 1
-----GGATGGCAGCCATCTTGCC- morR 19 1

```

>mmu-mir-128-1

```

TCTTCCTGAGCTGTTGGATTGCGGGCCGTAGCACTGTCTGAGAGTTTACATTTCTCACAGTGAACCGGTCTCTTTTTTCAGCTGCTTCTGACTTCTTTTACTTCTTTT species len reads
-CTTCCTGAGCTGTTGGATT----- morL 19 8
TCTTCCTGAGCTGTTGGATT----- morL 21 2
TCTTCCTGAGCTGTTGGATT----- morL 20 2
---TCCTGAGCTGTTGGATT----- morL 18 1
TCTTCCTGAGCTGTTGGA----- morL 18 1
-----CGGGCCGTAGCACTGTCTGA----- mirL 21 423
-----CGGGCCGTAGCACTGTCTGAGA----- mirL 23 360
-----CGGGCCGTAGCACTGTCTGAGAG----- mirL 24 53
-----CGGGCCGTAGCACTGTCTGAG----- mirL 22 29
-----CGGGCCGTAGCACTGTCTG----- mirL 20 24
-----CGGGCCGTAGCACTGTCTGAGAG----- mirL 25 22
-----CGGGCCGTAGCACTGTCTG----- mirL 18 19
-----TTGGGGCCGTAGCACTG----- mirL 18 9
-----TCGGGGCCGTAGCACTGTCTG----- mirL 19 3
-----GGGGCCGTAGCACTGTCTG----- mirL 18 1
-----ATTCGGGGCCGTAGCACT----- mirL 18 1

```

```

-----TCGGGGCCGTAGCACTGT----- mirL 18 1
-----GGGGCCGTAGCACTGTCT----- mirL 18 1
-----GGGGCCGTAGCACTGTCTGA----- mirL 20 1
-----TCACAGTGAACCGGTCTCTTT----- mirR 21 66688
-----TCACAGTGAACCGGTCTCTTT----- mirR 22 8781
-----TCACAGTGAACCGGTCTCTTT----- mirR 20 3296
-----TCACAGTGAACCGGTCTCTTTTT----- mirR 23 1336
-----CACAGTGAACCGGTCTCTTT----- mirR 20 1334
-----TCACAGTGAACCGGTCTCT----- mirR 19 803
-----TCACAGTGAACCGGTCTCTTTTTTC----- mirR 24 299
-----TCACAGTGAACCGGTCTCT----- mirR 18 251
-----CACAGTGAACCGGTCTCTTT----- mirR 21 148
-----CACAGTGAACCGGTCTCTTT----- mirR 19 70
-----ACAGTGAACCGGTCTCTTT----- mirR 19 62
-----CTCACAGTGAACCGGTCTCTTT----- mirR 22 57
-----CACAGTGAACCGGTCTCT----- mirR 18 42
-----CAGTGAACCGGTCTCTTT----- mirR 18 23
-----CACAGTGAACCGGTCTCTTTTT----- mirR 22 21
-----TCTCACAGTGAACCGGTCTCTTT----- mirR 23 17
-----ACAGTGAACCGGTCTCTTT----- mirR 18 14
-----CTCACAGTGAACCGGTCTCTTTTT----- mirR 23 14
-----TTCTCACAGTGAACCGGT----- mirR 18 7
-----CACAGTGAACCGGTCTCTTTTTTC----- mirR 23 6
-----CAGTGAACCGGTCTCTTTTT----- mirR 19 5
-----CTCACAGTGAACCGGTCTCTTT----- mirR 21 4
-----TCTCACAGTGAACCGGTCT----- mirR 18 4
-----TCTCACAGTGAACCGGTCTCT----- mirR 21 3
-----ACAGTGAACCGGTCTCTTTTT----- mirR 20 2
-----CTCACAGTGAACCGGTCTCT----- mirR 19 2
-----TCTCACAGTGAACCGGTCTCTTT----- mirR 22 2
-----CTCACAGTGAACCGGTCT----- mirR 18 1
-----TCTCACAGTGAACCGGTCTCTTTTT----- mirR 24 1
-----TTCAGCTGCTTCCTGAC----- morR 18 6
-----TTTTTCAGCTGCTTCCTG----- morR 18 2
-----AGCTGCTTCCTGACTTCTTTTT----- morR 22 1
-----TTCAGCTGCTTCCTGACTTCTTTTTTACTTCTTTT morR 34 1
-----CAGCTGCTTCCTGACTTC----- morR 18 1
-----TCAGCTGCTTCCTGACTT----- morR 18 1

>mmu-mir-127
CGCCGCTTTGATCACTGTCTCCAGCCTGCTGAAGCTCAGAGGGCTCTGATTCAGAAAGATCATCGGATCCGTCTGAGCTTGGCTGGTCCGGAAGTCTCATCATCTGCCTCCCT species len reads
-----CTTTGATCACTGTCTCCAGCCTG----- morL 23 37
-----GATCACTGTCTCCAGCCTG----- morL 19 26
CGCCGCTTTGATCACTGTCTCCAGCCTG----- morL 28 22
-----TTGATCACTGTCTCCAGCCTG----- morL 21 15
-----TGATCACTGTCTCCAGCCTG----- morL 20 14

```

```

-----GCTTTGATCACTGTCTCCAGCCTG----- morL 24 14
-----GATCACTGTCTCCAGCCTGCT----- morL 21 9
-----TTTGATCACTGTCTCCAGCCTG----- morL 22 5
-----ATCACTGTCTCCAGCCTGCT----- morL 20 3
-----TTGATCACTGTCTCCAGCCT----- morL 20 1
-----TCACTGTCTCCAGCCTGC----- morL 18 1
-----TTGATCACTGTCTCCAGCC----- morL 19 1
-----CTGAAGCTCAGAGGGCTCTGATT----- mirL 23 3621
-----GAAGCTCAGAGGGCTCTGATT----- mirL 21 1776
-----GAAGCTCAGAGGGCTCTGATTC----- mirL 22 991
-----CTGAAGCTCAGAGGGCTCTGAT----- mirL 22 957
-----CTGAAGCTCAGAGGGCTCTGATTC----- mirL 24 454
-----TGAAGCTCAGAGGGCTCTGATT----- mirL 22 258
-----CTGAAGCTCAGAGGGCTCTGA----- mirL 21 197
-----GAAGCTCAGAGGGCTCTGATTCA----- mirL 23 186
-----CTGAAGCTCAGAGGGCTCTGATTCA----- mirL 25 114
-----CTGAAGCTCAGAGGGCTCTG----- mirL 20 102
-----GAAGCTCAGAGGGCTCTGAT----- mirL 20 71
-----CTGAAGCTCAGAGGGCTCTGATTCAG----- mirL 26 35
-----TGCTGAAGCTCAGAGGGCTCTGATT----- mirL 25 33
-----TGCTGAAGCTCAGAGGGCTCTGA----- mirL 23 31
-----TGAAGCTCAGAGGGCTCTGATTC----- mirL 23 30
-----GAAGCTCAGAGGGCTCTGA----- mirL 19 20
-----TGAAGCTCAGAGGGCTCTGATTCA----- mirL 24 17
-----GAAGCTCAGAGGGCTCTGATTCAG----- mirL 24 17
-----GCTGAAGCTCAGAGGGCTCTGAT----- mirL 23 14
-----GCTGAAGCTCAGAGGGCTCTGATT----- mirL 24 13
-----GAAGCTCAGAGGGCTCTGATTCAGA----- mirL 25 13
-----AAGCTCAGAGGGCTCTGATT----- mirL 20 11
-----AAGCTCAGAGGGCTCTGATTCA----- mirL 22 9
-----TGAAGCTCAGAGGGCTCTGAT----- mirL 21 8
-----AAGCTCAGAGGGCTCTGATTC----- mirL 21 5
-----TGCTGAAGCTCAGAGGGCTCTGAT----- mirL 24 5
-----TGAAGCTCAGAGGGCTCTG----- mirL 19 3
-----TGCTGAAGCTCAGAGGGCTCTGATTC----- mirL 26 3
-----GCTGAAGCTCAGAGGGCTCTG----- mirL 21 3
-----TGCTGAAGCTCAGAGGGC----- mirL 18 3
-----AAGCTCAGAGGGCTCTGAT----- mirL 19 3
-----CTGCTGAAGCTCAGAGGGC----- mirL 19 2
-----TGCTGAAGCTCAGAGGGCTCTG----- mirL 22 1
-----TGAAGCTCAGAGGGCTCT----- mirL 18 1
-----AAGCTCAGAGGGCTCTGA----- mirL 18 1
-----TGAAGCTCAGAGGGCTCTGA----- mirL 20 1
-----TCGGATCCGTCTGAGCTTGGCT----- mirR 22 31699
-----TCGGATCCGTCTGAGCTTGGCTG----- mirR 23 12476
-----TCGGATCCGTCTGAGCTTGGCTGG----- mirR 24 10984

```

```
-----TCGGATCCGTCTGAGCTTGGC----- mirR 21 5839
-----TCGGATCCGTCTGAGCTTGGCTGGT----- mirR 25 4600
-----TCGGATCCGTCTGAGCTTGG----- mirR 20 2477
-----CGGATCCGTCTGAGCTTGGCT----- mirR 21 1341
-----ATCGGATCCGTCTGAGCTTGGC----- mirR 22 676
-----TCGGATCCGTCTGAGCTTGGCTGGTC----- mirR 26 548
-----CGGATCCGTCTGAGCTTGGCTGG----- mirR 23 474
-----CGGATCCGTCTGAGCTTGGCTG----- mirR 22 435
-----CGGATCCGTCTGAGCTTGGC----- mirR 20 222
-----CGGATCCGTCTGAGCTTGGCTGGT----- mirR 24 219
-----ATCGGATCCGTCTGAGCTTGG----- mirR 21 188
-----ATCGGATCCGTCTGAGCTTGGCT----- mirR 23 187
-----CATCGGATCCGTCTGAGCTTGG----- mirR 22 184
-----CGGATCCGTCTGAGCTTGG----- mirR 19 109
-----ATCGGATCCGTCTGAGCTTGGCTG----- mirR 24 95
-----GGATCCGTCTGAGCTTGGCTGG----- mirR 22 56
-----CATCGGATCCGTCTGAGCTTGGC----- mirR 23 43
-----GGATCCGTCTGAGCTTGGCTGGT----- mirR 23 34
-----GGATCCGTCTGAGCTTGG----- mirR 18 25
-----CGGATCCGTCTGAGCTTGGCTGGTC----- mirR 25 23
-----ATCGGATCCGTCTGAGCTTGG----- mirR 20 23
-----CATCGGATCCGTCTGAGCTTGGCTG----- mirR 25 21
-----GGATCCGTCTGAGCTTGGCTGGTC----- mirR 24 14
-----GGATCCGTCTGAGCTTGGCTG----- mirR 21 12
-----ATCGGATCCGTCTGAGCTTGGCTGG----- mirR 25 9
-----CATCGGATCCGTCTGAGCTTGG----- mirR 21 9
-----GGATCCGTCTGAGCTTGGCTGGTCG----- mirR 25 8
-----TCATCGGATCCGTCTGAGCTTGG----- mirR 23 7
-----GGATCCGTCTGAGCTTGGCT----- mirR 20 5
-----ATCGGATCCGTCTGAGCTT----- mirR 19 5
-----CATCGGATCCGTCTGAGCTT----- mirR 20 1
-----CATCGGATCCGTCTGAGC----- mirR 18 1
-----GATCCGTCTGAGCTTGGCT----- mirR 19 1
-----GATCCGTCTGAGCTTGGCTGG----- mirR 21 1
-----GATCCGTCTGAGCTTGGCTG----- mirR 20 1
-----CATCGGATCCGTCTGAGCTTGGCT----- mirR 24 1
-----TCATCGGATCCGTCTGAGCTTGGCT----- mirR 25 1
-----GGTCGGAAGTCTCATCAT----- morR 18 3
-----GCTGGTCGGAAGTCTCAT----- morR 18 2
-----CTGGTCGGAAGTCTCAT----- morR 18 1
-----GGTCGGAAGTCTCATCATCTGCCTCCCT morR 28 1
-----GGTCGGAAGTCTCATCATCTG----- morR 21 1
```

```
>mmu-mir-291b
CCTCAGGTCTTGAAGTTGGAACATACAGTGTTCGATCAAAGTGGAGGCCCTCTCCGCGGCTTGGCGGAAAGTGCATCCATTTGTTGTCTCTGTGTACATGGCGTCTGAAAAGCCGGCTGC species len r
CCTCAGGTCTTGAAGTTGGAACATACAGTG----- morL 31 11
```

|                                      |      |    |       |
|--------------------------------------|------|----|-------|
| -----TGGAACATACAGTGTTCGAT-----       | morL | 19 | 11    |
| -----AAGTTGGAACATACAGTGTTC-----      | morL | 20 | 8     |
| -----GGAAGTTGGAACATACAGTG-----       | morL | 20 | 7     |
| -----TGGAACATACAGTGTTCGA-----        | morL | 18 | 5     |
| -----AAGTTGGAACATACAGTG-----         | morL | 18 | 5     |
| -CTCAGGTCTTGGAGTTGGAACATACAGTGTTC-   | morL | 32 | 5     |
| -----TGGAAGTTGGAACATACAGTGT-----     | morL | 22 | 5     |
| -----GAAGTTGGAACATACAGTGTTCGA-----   | morL | 23 | 3     |
| -----AGTTGGAACATACAGTGTTC-----       | morL | 19 | 1     |
| -----AAGTTGGAACATACAGTGTTCGAT-----   | morL | 23 | 1     |
| -----GAAGTTGGAACATACAGTG-----        | morL | 18 | 1     |
| -----GGAACATACAGTGTTCGAT-----        | morL | 18 | 1     |
| -----AAGTTGGAACATACAGTGT-----        | morL | 19 | 1     |
| -----TGGAGTTGGAACATACAGTGTTC-----    | morL | 23 | 1     |
| -----TTGGAACATACAGTGTTCG-----        | morL | 18 | 1     |
| -----GATCAAAGTGGAGGCCCTCTCC-----     | mirL | 22 | 24888 |
| -----GATCAAAGTGGAGGCCCTCTC-----      | mirL | 21 | 4478  |
| -----GATCAAAGTGGAGGCCCTCTCCGC-----   | mirL | 24 | 3852  |
| -----GATCAAAGTGGAGGCCCTCT-----       | mirL | 20 | 2939  |
| -----GATCAAAGTGGAGGCCCTCTCCG-----    | mirL | 23 | 2575  |
| -----TCAAAGTGGAGGCCCTCTCCGC-----     | mirL | 22 | 1330  |
| -----GATCAAAGTGGAGGCCCTCTCCGCG-----  | mirL | 25 | 721   |
| -----GATCAAAGTGGAGGCCCTC-----        | mirL | 19 | 642   |
| -----TCGATCAAAGTGGAGGCCCTCT-----     | mirL | 22 | 526   |
| -----TCGATCAAAGTGGAGGCCCTCTCC-----   | mirL | 24 | 418   |
| -----ATCAAAGTGGAGGCCCTCTCCGC-----    | mirL | 23 | 327   |
| -----TCAAAGTGGAGGCCCTCTCCGCG-----    | mirL | 23 | 269   |
| -----TCAAAGTGGAGGCCCTCTCC-----       | mirL | 20 | 263   |
| -----TCAAAGTGGAGGCCCTCTCCGCGG-----   | mirL | 24 | 232   |
| -----TCAAAGTGGAGGCCCTCTCCG-----      | mirL | 21 | 166   |
| -----TCGATCAAAGTGGAGGCCCTCTC-----    | mirL | 23 | 163   |
| -----ATCAAAGTGGAGGCCCTCTCCG-----     | mirL | 22 | 151   |
| -----ATCAAAGTGGAGGCCCTCTCC-----      | mirL | 21 | 131   |
| -----CAAAGTGGAGGCCCTCTCCGC-----      | mirL | 21 | 118   |
| -----TCAAAGTGGAGGCCCTCTCCGCGG-----   | mirL | 25 | 74    |
| -----CGATCAAAGTGGAGGCCCTCTCC-----    | mirL | 23 | 55    |
| -----CAAAGTGGAGGCCCTCTCC-----        | mirL | 19 | 51    |
| -----TCGATCAAAGTGGAGGCCCTC-----      | mirL | 21 | 50    |
| -----TCGATCAAAGTGGAGGCCCTCTCCGC----- | mirL | 26 | 44    |
| -----ATCAAAGTGGAGGCCCTCTCCGCG-----   | mirL | 24 | 42    |
| -----TCAAAGTGGAGGCCCTCTCCGCGGCT----- | mirL | 26 | 39    |
| -----CAAAGTGGAGGCCCTCTCCGCG-----     | mirL | 22 | 35    |
| -----CAAAGTGGAGGCCCTCTCCGCGG-----    | mirL | 23 | 30    |
| -----TCGATCAAAGTGGAGGCCCTCTCCG-----  | mirL | 25 | 25    |
| -----TCGATCAAAGTGGAGGCCCT-----       | mirL | 20 | 24    |
| -----CAAAGTGGAGGCCCTCTCCG-----       | mirL | 20 | 23    |

|                                     |               |
|-------------------------------------|---------------|
| -----ATCAAAGTGGAGGCCCTCTCCGCGG----- | mirL 25 22    |
| -----CGATCAAAGTGGAGGCCCTCTC-----    | mirL 22 15    |
| -----CGATCAAAGTGGAGGCCCTCTCCGC----- | mirL 25 9     |
| -----CGATCAAAGTGGAGGCCCTCT-----     | mirL 21 8     |
| -----CAAAGTGGAGGCCCTCTCCGCGGC-----  | mirL 24 7     |
| -----CGATCAAAGTGGAGGCCCTCTCCG-----  | mirL 24 6     |
| -----CGATCAAAGTGGAGGCCCTC-----      | mirL 20 5     |
| -----CGATCAAAGTGGAGGCCCT-----       | mirL 19 2     |
| -----CAAAGTGGAGGCCCTCTCCGCGGCT----- | mirL 25 1     |
| -----GTCGATCAAAGTGGAGGCCCT-----     | mirL 21 1     |
| -----AAAGTGCATCCATTTGTTTGT-----     | mirR 22 29800 |
| -----AAAGTGCATCCATTTGTTTGT-----     | mirR 21 2089  |
| -----AAAGTGCATCCATTTGTTTGTCT-----   | mirR 23 1142  |
| -----GGGAAAGTGCATCCATTTGTT-----     | mirR 22 606   |
| -----GGGAAAGTGCATCCATTTGTTT-----    | mirR 23 602   |
| -----AAAGTGCATCCATTTGTTTGTCT-----   | mirR 24 447   |
| -----GGGAAAGTGCATCCATTTGT-----      | mirR 21 276   |
| -----AAGTGCATCCATTTGTTTGT-----      | mirR 21 238   |
| -----AAGTGCATCCATTTGTTTGTCT-----    | mirR 23 215   |
| -----AAAGTGCATCCATTTGTTT-----       | mirR 20 159   |
| -----AAAGTGCATCCATTTGTTTGTCTC-----  | mirR 25 90    |
| -----AAGTGCATCCATTTGTTTGTCT-----    | mirR 22 88    |
| -----GGGAAAGTGCATCCATTTGTTTGT-----  | mirR 24 55    |
| -----AAAGTGCATCCATTTGTTTGTCTCT----- | mirR 26 48    |
| -----GTGCATCCATTTGTTTGTCT-----      | mirR 20 35    |
| -----GGAAAGTGCATCCATTTGTTT-----     | mirR 22 34    |
| -----AGTGCATCCATTTGTTTGT-----       | mirR 20 24    |
| -----AAGTGCATCCATTTGTTTGTCTC-----   | mirR 24 21    |
| -----AGTGCATCCATTTGTTTGT-----       | mirR 19 16    |
| -----GGGAAAGTGCATCCATTTGT-----      | mirR 20 15    |
| -----GAAAGTGCATCCATTTGTTTGT-----    | mirR 22 13    |
| -----AAGTGCATCCATTTGTTTGTCTCT-----  | mirR 25 13    |
| -----GGGAAAGTGCATCCATTT-----        | mirR 18 13    |
| -----GAAAGTGCATCCATTTGTTTGT-----    | mirR 23 12    |
| -----AAGTGCATCCATTTGTTTGT-----      | mirR 20 10    |
| -----GGGAAAGTGCATCCATTT-----        | mirR 19 9     |
| -----AGTGCATCCATTTGTTTGTCTC-----    | mirR 21 7     |
| -----GAAAGTGCATCCATTTGTTT-----      | mirR 21 7     |
| -----GGAAAGTGCATCCATTTGTTTGT-----   | mirR 23 6     |
| -----GGAAAGTGCATCCATTTGTTTGT-----   | mirR 24 5     |
| -----GAAAGTGCATCCATTTGT-----        | mirR 18 5     |
| -----GTGCATCCATTTGTTTGT-----        | mirR 19 4     |
| -----AGTGCATCCATTTGTTTGTCTC-----    | mirR 23 2     |
| -----GGAAAGTGCATCCATTTGTT-----      | mirR 21 2     |
| -----GAAAGTGCATCCATTTGTTTGTCTC----- | mirR 26 1     |
| -----AAGTGCATCCATTTGTTTGTCTCTG----- | mirR 26 1     |

```

-----GGAAAGTGCATCCATTTTGT----- mirR 20 1
-----CTCTGTGTGTACATGGCGTCTGAAAAGCCGGC--- morR 32 5
-----GTCTCTGTGTGTACATGG----- morR 18 3
-----TCTGTGTGTACATGGCGTCTGAA----- morR 23 1
-----CTCTGTGTGTACATGGCGTCTGAAAAGCCGGCTGC morR 35 1
-----GTCTCTGTGTGTACATGGCG----- morR 20 1
-----CTCTGTGTGTACATGGCGTCTGAAA----- morR 25 1
-----CTCTGTGTGTACATGGCGTCTGAAAAGC----- morR 28 1

```

>mmu-mir-301b

| Species | len | reads |
|---------|-----|-------|
| morL    | 18  | 3     |
| morL    | 22  | 1     |
| morL    | 19  | 1     |
| morL    | 20  | 1     |
| morL    | 18  | 1     |
| morL    | 20  | 1     |
| mirL    | 22  | 2485  |
| mirL    | 21  | 793   |
| mirL    | 20  | 127   |
| mirL    | 23  | 111   |
| mirL    | 19  | 46    |
| mirL    | 18  | 13    |
| mirL    | 19  | 4     |
| mirL    | 24  | 4     |
| mirL    | 18  | 1     |
| mirL    | 18  | 1     |
| mirL    | 20  | 1     |
| mirL    | 22  | 1     |
| mirL    | 22  | 1     |
| mirL    | 21  | 1     |
| loop    | 18  | 2     |
| loop    | 18  | 1     |
| loop    | 19  | 1     |
| mirR    | 26  | 25682 |
| mirR    | 25  | 21543 |
| mirR    | 24  | 11459 |
| mirR    | 23  | 7200  |
| mirR    | 25  | 3699  |
| mirR    | 22  | 3417  |
| mirR    | 27  | 829   |
| mirR    | 21  | 750   |
| mirR    | 23  | 677   |
| mirR    | 24  | 622   |
| mirR    | 22  | 255   |
| mirR    | 26  | 123   |



|                                                                                                                         |         |     |       |
|-------------------------------------------------------------------------------------------------------------------------|---------|-----|-------|
| -----AGTGCAATGGTATTGTCAAAG-----                                                                                         | mirR    | 21  | 83    |
| -----GTGCAATGGTATTGTCAA-----                                                                                            | mirR    | 18  | 48    |
| -----GTGCAATGGTATTGTCAAAGCA-----                                                                                        | mirR    | 22  | 39    |
| -----AGTGCAATGGTATTGTCAA-----                                                                                           | mirR    | 20  | 27    |
| -----TGCAATGGTATTGTCAAAGCA-----                                                                                         | mirR    | 21  | 20    |
| -----TGCAATGGTATTGTCAAAGCATCT-----                                                                                      | mirR    | 24  | 15    |
| -----GTGCAATGGTATTGTCAAAG-----                                                                                          | mirR    | 20  | 11    |
| -----GTGCAATGGTATTGTCAAAGCAT-----                                                                                       | mirR    | 23  | 9     |
| -----GTGCAATGGTATTGTCAA-----                                                                                            | mirR    | 19  | 5     |
| -----GTGCAATGGTATTGTCAAAGCATC-----                                                                                      | mirR    | 24  | 4     |
| -----TGCAATGGTATTGTCAAAGCATC-----                                                                                       | mirR    | 23  | 3     |
| -----GTGCAATGGTATTGTCAAAGCATCT-----                                                                                     | mirR    | 25  | 2     |
| -----GCAGTGCAATGGTATTGTCAAAGCATC-----                                                                                   | mirR    | 27  | 2     |
| -----AGCAGTGCAATGGTATTG-----                                                                                            | mirR    | 18  | 2     |
| -----TGCAATGGTATTGTCAAAGCAT-----                                                                                        | mirR    | 22  | 2     |
| -----GCAGTGCAATGGTATTGTCAAAGCAT-----                                                                                    | mirR    | 26  | 2     |
| -----AAGCAGTGCAATGGTATTGTCAAAGCAT-----                                                                                  | mirR    | 28  | 1     |
| -----AGCAGTGCAATGGTATTGTCAAAGC-----                                                                                     | mirR    | 25  | 1     |
| -----TGCAATGGTATTGTCAAAGCATCTG-----                                                                                     | mirR    | 25  | 1     |
| -----GCAGTGCAATGGTATTGTCAAAGCA-----                                                                                     | mirR    | 25  | 1     |
| -----CTGGGACCAGCCTCGAAGACCACCT-----                                                                                     | morR    | 25  | 9     |
| -----CTGGGACCAGCCTCGAAGACC-----                                                                                         | morR    | 21  | 7     |
| -----CTGGGACCAGCCTCGAAGACCACCTCACCTACTGT-----                                                                           | morR    | 35  | 3     |
| -----CTGGGACCAGCCTCGAAGACCACC-----                                                                                      | morR    | 24  | 2     |
| -----CTGGGACCAGCCTCGAAGACCACCTCACCT-----                                                                                | morR    | 30  | 1     |
| -----GGACCAGCCTCGAAGACC-----                                                                                            | morR    | 18  | 1     |
| -----CTGGGACCAGCCTCGAAG-----                                                                                            | morR    | 18  | 1     |
| -----CTGGGACCAGCCTCGAAGACCA-----                                                                                        | morR    | 22  | 1     |
| <br>                                                                                                                    |         |     |       |
| >mmu-mir-667                                                                                                            |         |     |       |
| TTTCCATCTAGTGGGTACTGGCCTCGGTGCTGGTGGAGCAGTGAGCAGCCATACATTATATCTGTGACACCTGCCACCCAGCCCAAGCCCCCTAGGCCACAAACTTCTGGAGGGGAGTT | species | len | reads |
| -----TCTAGTGGGTACTGGCCT-----                                                                                            | morL    | 18  | 5     |
| -----TCTAGTGGGTACTGGCCTC-----                                                                                           | morL    | 19  | 4     |
| -----ATCTAGTGGGTACTGGCCTC-----                                                                                          | morL    | 20  | 3     |
| -----ATCTAGTGGGTACTGGCCT-----                                                                                           | morL    | 19  | 2     |
| TTTCCATCTAGTGGGTACTGGCCT-----                                                                                           | morL    | 24  | 2     |
| -----CATCTAGTGGGTACTGGCCTC-----                                                                                         | morL    | 21  | 1     |
| -----ATCTAGTGGGTACTGGCCTCG-----                                                                                         | morL    | 21  | 1     |
| -----TCTAGTGGGTACTGGCCTCG-----                                                                                          | morL    | 20  | 1     |
| -----ATCTAGTGGGTACTGGCC-----                                                                                            | morL    | 18  | 1     |
| -----CGGTGCTGGTGGAGCAGTGAGCAG-----                                                                                      | mirL    | 25  | 1442  |
| -----CGGTGCTGGTGGAGCAGTGAGCAGC-----                                                                                     | mirL    | 26  | 446   |
| -----GGTGCTGGTGGAGCAGTGAGCAG-----                                                                                       | mirL    | 24  | 437   |
| -----CGGTGCTGGTGGAGCAGTGAGCA-----                                                                                       | mirL    | 23  | 274   |
| -----CGGTGCTGGTGGAGCAGTGAGCAC-----                                                                                      | mirL    | 24  | 245   |
| -----CGGTGCTGGTGGAGCAGTGAGC-----                                                                                        | mirL    | 22  | 174   |

```

-----CGGTGCTGGTGGAGCAGTGAGCACGCC----- mirL 27 106
-----GGTGCTGGTGGAGCAGTGAGCACGC----- mirL 25 92
-----GGTGCTGGTGGAGCAGTGAGCA----- mirL 22 60
-----CGGTGCTGGTGGAGCAGTGAG----- mirL 21 57
-----GGTGCTGGTGGAGCAGTGAGCAC----- mirL 23 28
-----GGTGCTGGTGGAGCAGTGAGCACGCC----- mirL 26 26
-----GGTGCTGGTGGAGCAGTGAG----- mirL 20 9
-----GGTGCTGGTGGAGCAGTGAGCACGCCA----- mirL 27 6
-----TCGGTGCTGGTGGAGCAGTGAGCAC----- mirL 25 4
-----GTGCTGGTGGAGCAGTGAG----- mirL 19 2
-----TCGGTGCTGGTGGAGCAGTGAGC----- mirL 23 2
-----TCGGTGCTGGTGGAGCAGTGAG----- mirL 22 2
-----TCGGTGCTGGTGGAGCAGTGAGCACGC----- mirL 27 2
-----CTCGGTGCTGGTGGAGCAGTGAGCAC----- mirL 26 1
-----TGCTGGTGGAGCAGTGAGCACG----- mirL 22 1
-----TCGGTGCTGGTGGAGCAGTGAGCA----- mirL 24 1
-----GTGCTGGTGGAGCAGTGAGCAC----- mirL 22 1
-----GTGCTGGTGGAGCAGTGAGCACGC----- mirL 24 1
-----TCGGTGCTGGTGGAGCAGTGAGCACG----- mirL 26 1
-----GTGCTGGTGGAGCAGTGA----- mirL 18 1
-----CTCGGTGCTGGTGGAGCAGTGAGCACG----- mirL 27 1
-----CCATACATTATATCTGTG----- loop 18 1
-----CGCCATACATTATATCTGTG----- loop 20 1
-----ACGCCATACATTATATCTGTGA----- loop 22 1
-----CATACATTATATCTGTGA----- loop 18 1
-----TGACACCTGCCACCCAGCCCAAG----- mirR 23 24634
-----TGACACCTGCCACCCAGCCCAA----- mirR 22 15169
-----TGACACCTGCCACCCAGCCCAAGG----- mirR 24 14588
-----GACACCTGCCACCCAGCCCAAGG----- mirR 23 4156
-----GACACCTGCCACCCAGCCCAAG----- mirR 22 3928
-----TGACACCTGCCACCCAGCCCAAGGC----- mirR 25 2940
-----GACACCTGCCACCCAGCCCAA----- mirR 21 2406
-----TGACACCTGCCACCCAGCCCA----- mirR 21 2290
-----TGACACCTGCCACCCAGCCC----- mirR 20 896
-----TGACACCTGCCACCCAGCCCAAGGCC----- mirR 26 868
-----GACACCTGCCACCCAGCCCAAGGC----- mirR 24 729
-----GACACCTGCCACCCAGCCCA----- mirR 20 421
-----ACACCTGCCACCCAGCCCAAGG----- mirR 22 341
-----ACACCTGCCACCCAGCCCAAG----- mirR 21 228
-----GACACCTGCCACCCAGCCCAAGGCC----- mirR 25 216
-----GACACCTGCCACCCAGCCC----- mirR 19 166
-----ACACCTGCCACCCAGCCCAA----- mirR 20 79
-----CACCTGCCACCCAGCCCAAG----- mirR 20 74
-----ACACCTGCCACCCAGCCCAAGGC----- mirR 23 50
-----ACACCTGCCACCCAGCCCAA----- mirR 19 20
-----GTGACACCTGCCACCCAGCCCAA----- mirR 23 20

```

```

-----CACCTGCCACCCAGCCCAA----- mirR 19 11
-----ACACCTGCCACCCAGCCC----- mirR 18 8
-----GTGACACCTGCCACCCAGCCCAAG----- mirR 24 6
-----CACCTGCCACCCAGCCCAA----- mirR 18 6
-----ACACCTGCCACCCAGCCCAAGGCC----- mirR 24 5
-----TGTGACACCTGCCACCCAGCCCAA----- mirR 24 4
-----GTGACACCTGCCACCCAGCCC----- mirR 21 2
-----CTGTGACACCTGCCACCCAGC----- mirR 21 2
-----CTGTGACACCTGCCACCCAG----- mirR 20 1
-----GTGACACCTGCCACCCAGCCCAAGGCC----- mirR 27 1
-----CACCTGCCACCCAGCCCAAGG----- mirR 21 1
-----GTGACACCTGCCACCCAGCCCAA----- mirR 22 1
-----TGTGACACCTGCCACCCAGCCC----- mirR 22 1
-----GCCCCCTAGGCCCCACAAAC----- morR 18 3
-----GCCCCCTAGGCCCCACAAACTTCTGGAGGGGAGTT morR 33 1
-----AAGGCCCTAGGCCCCACA----- morR 18 1
-----GGCCCCCTAGGCCCCACAAA----- morR 18 1

```

>mmu-mir-3102

```

GTGAGTGGCCAGGGTGGGGCTGGGTGGTGCAGGCAGGAGAGCCATTGATCTATTGTGGGCTCTACTCCCTGCCCCAGCCAGAGCACCCATTGGCTACCCACAGGTACACAGCAGCCAGCGTCATTG species len
GTGAGTGGCCAGGGTGGGGCTGG----- morL 23 38
GTGAGTGGCCAGGGTGGGGCTG----- morL 22 28
GTGAGTGGCCAGGGTGGGGCTGGGT----- morL 25 6
GTGAGTGGCCAGGGTGGGGCTGGG----- morL 24 6
GTGAGTGGCCAGGGTGGGGC----- morL 20 4
---AGTGGCCAGGGTGGGGCT----- morL 18 4
---GTGGCCAGGGTGGGGCTGGG----- morL 20 2
GTGAGTGGCCAGGGTGGGG----- morL 19 1
-TGAGTGGCCAGGGTGGGGCTGG----- morL 22 1
-----GGTGGTGCAGGCAGGAGAGCC----- mirL 21 1325
-----GGTGGTGCAGGCAGGAGAGCCA----- mirL 22 1224
-----GGTGGTGCAGGCAGGAGAGC----- mirL 20 866
-----GGTGGTGCAGGCAGGAGAGCCAT----- mirL 23 741
-----GGTGGTGCAGGCAGGAGAGCCATT----- mirL 24 687
-----GGTGGTGCAGGCAGGAGAGCCATTG----- mirL 25 448
-----GGTGGTGCAGGCAGGAGAG----- mirL 19 276
-----GTGGTGCAGGCAGGAGAGCCA----- mirL 21 28
-----GTGGTGCAGGCAGGAGAGCCAT----- mirL 22 20
-----GTGGTGCAGGCAGGAGAGCCATT----- mirL 23 13
-----GTGGTGCAGGCAGGAGAGCCATTG----- mirL 24 9
-----GGTGCAGGCAGGAGAGCCATT----- mirL 21 6
-----GTGGTGCAGGCAGGAGAGC----- mirL 19 6
-----TGGTGCAGGCAGGAGAGCCATTG----- mirL 23 3
-----GGTGCAGGCAGGAGAGCCAT----- mirL 20 2
-----TGGGTGGTGCAGGCAGGA----- mirL 18 1
-----GGGTGGTGCAGGCAGGAGA----- mirL 19 1

```

```

-----GTGGTGCAGGCAGGAGAGCCATTGA----- mirL 25 1
-----GGTGCAGGCAGGAGAGCC----- mirL 18 1
-----GTGGTGCAGGCAGGAGAGCC----- mirL 20 1
-----TGGGTGGTGCAGGCAGGAGAGCCA----- mirL 24 1
-----GGGTGGTGCAGGCAGGAGAGCCAT----- mirL 24 1
-----GAGCACCCCATTGGCTACCCACAGG----- mirR 25 20742
-----GAGCACCCCATTGGCTACCCACA----- mirR 23 20321
-----GAGCACCCCATTGGCTACCCACAG----- mirR 24 15632
-----GAGCACCCCATTGGCTACCCAC----- mirR 22 4281
-----GAGCACCCCATTGGCTACCCACAGGT----- mirR 26 3029
-----GAGCACCCCATTGGCTACCCACAGGTA----- mirR 27 2489
-----CACCCCATTGGCTACCCACAGG----- mirR 22 1102
-----GAGCACCCCATTGGCTACCCA----- mirR 21 1020
-----AGAGCACCCCATTGGCTACCCACA----- mirR 24 363
-----CACCCCATTGGCTACCCACAGGT----- mirR 23 333
-----AGAGCACCCCATTGGCTACCCACAG----- mirR 25 176
-----CACCCCATTGGCTACCCACAG----- mirR 21 170
-----AGAGCACCCCATTGGCTACCCAC----- mirR 23 138
-----CACCCCATTGGCTACCCACAGGTA----- mirR 24 132
-----AGAGCACCCCATTGGCTACCCACAGG----- mirR 26 110
-----AGAGCACCCCATTGGCTACCCA----- mirR 22 104
-----CACCCCATTGGCTACCCACA----- mirR 20 80
-----AGCACCCCATTGGCTACCCACAG----- mirR 23 32
-----AGAGCACCCCATTGGCTACCCACAGGT----- mirR 27 27
-----CAGAGCACCCCATTGGCTACCCACAGG----- mirR 27 27
-----AGCACCCCATTGGCTACCCACAGG----- mirR 24 23
-----AGAGCACCCCATTGGCTACCCACAGGTA----- mirR 28 22
-----AGCACCCCATTGGCTACCCACA----- mirR 22 15
-----GCACCCCATTGGCTACCCACAGG----- mirR 23 14
-----CACCCCATTGGCTACCCAC----- mirR 19 11
-----CAGAGCACCCCATTGGCTACCCACA----- mirR 25 8
-----CACCCCATTGGCTACCCA----- mirR 18 6
-----AGCACCCCATTGGCTACCCACAGGT----- mirR 25 6
-----AGCACCCCATTGGCTACCCACAGGTA----- mirR 26 3
-----CAGAGCACCCCATTGGCTACCCACAG----- mirR 26 3
-----AGCACCCCATTGGCTACCCA----- mirR 20 3
-----CAGAGCACCCCATTGGCTACCCAC----- mirR 24 2
-----GCACCCCATTGGCTACCCACAG----- mirR 22 2
-----GCACCCCATTGGCTACCCACAGGTA----- mirR 25 1
-----CAGAGCACCCCATTGGCTACC----- mirR 21 1
-----CAGAGCACCCCATTGGCTACCCA----- mirR 23 1
-----AGCACCCCATTGGCTACCCAC----- mirR 21 1
-----GCACCCCATTGGCTACCCACA----- mirR 21 1
-----ACAGCAGCCAGCGTCATT----- morR 18 2
-----CACAGCAGCCAGCGTCATTG----- morR 20 1
-----TACACAGCAGCCAGCGTC----- morR 18 1

```

```

-----AGGTACACAGCAGCCAGC----- morR 18 1
-----GGTACACAGCAGCCAGCG----- morR 18 1
-----ACACAGCAGCCAGCGTCA--- morR 18 1

>mmu-mir-1274a
TCCTTCTGCCATTCTTCAGGTCCCTGTTTCAGGCGCCAAACTGTTGCTGGCCGTCACAGCGCACGAAGGAACAGGTACAGCTGAGATGGCAGGCTCAAGCTAAAAGAAAAGGAAGTAAGGGACGGAAGAAAGAACGG sp
TCCTTCTGCCATTCTTCA----- mo
-----GTCCCTGTTTCAGGCGCCA----- mi
-----GTCCCTGTTTCAGGCGCCAA----- mi
-----TCCCTGTTTCAGGCGCCAA----- mi
-----GGTCCCTGTTTCAGGCGCCA----- mi
-----TCCCTGTTTCAGGCGCCAAA----- mi
-----GTCCCTGTTTCAGGCGCCAAA----- mi
-----TCCCTGTTTCAGGCGCCAAAC----- mi
-----CAGGTCCCTGTTTCAGGCGCCA----- mi
-----GGTCCCTGTTTCAGGCGCCAA----- mi
-----AGGTCCCTGTTTCAGGCGCCA----- mi
-----CCCTGTTTCAGGCGCCAAA----- mi
-----GTCCCTGTTTCAGGCGCCAAAC----- mi
-----TCCCTGTTTCAGGCGCCAAACT----- mi
-----CAGGTCCCTGTTTCAGGCGCCAA----- mi
-----CAGGTCCCTGTTTCAGGCGCC----- mi
-----GGTCCCTGTTTCAGGCGCC----- mi
-----GTCCCTGTTTCAGGCGCCAAACTGT----- mi
-----AGGTCCCTGTTTCAGGCGC----- mi
-----AGGTCCCTGTTTCAGGCGCCAA----- mi
-----GTCCCTGTTTCAGGCGCCAAACT----- mi
-----TCCCTGTTTCAGGCGCCAAACTG----- mi
-----CAGGTCCCTGTTTCAGGCGC----- mi
-----CCCTGTTTCAGGCGCCAAACT----- mi
-----GTCCCTGTTTCAGGCGCCAAACTG----- mi
-----AGGTCCCTGTTTCAGGCGCC----- mi
-----CCCTGTTTCAGGCGCCAAAC----- mi
-----GGTCCCTGTTTCAGGCGCCAAA----- mi
-----CAGGTCCCTGTTTCAGGCGCCAAA----- mi
-----CCTGTTTCAGGCGCCAAACTG----- mi
-----GAGGGACGGAAGAAAGAAC----- mi
-----TAGAGGGACGGAAGAAAG----- mi
-----AGGGACGGAAGAAAGAAC----- mi
-----AGAGGGACGGAAGAAAGA----- mi
-----GGGACGGAAGAAAGAACGG----- mi

>mmu-mir-138-1
CTAGCATGGTGTGTGGGACAGCTGGTGTGTGAATCAGGCCGTTGCCAATCAGAGAACGGCTACTTCACAACACCAGGGCCACACTGCACTGCAAGCAGCGAGCAGCAAGCAAC species len reads
-TAGCATGGTGTGTGGGAC----- morL 19 7
-----ATGGTGTGTGGGACAGC----- morL 18 3

```

|                                     |      |    |       |
|-------------------------------------|------|----|-------|
| -TAGCATGGTGTGTGGGACA-----           | morL | 20 | 3     |
| CTAGCATGGTGTGTGGG-----              | morL | 18 | 1     |
| -TAGCATGGTGTGTGGGACAGC-----         | morL | 22 | 1     |
| --AGCATGGTGTGTGGGAC-----            | morL | 18 | 1     |
| ----CATGGTGTGTGGGACAG-----          | morL | 18 | 1     |
| -TAGCATGGTGTGTGGGA-----             | morL | 18 | 1     |
| CTAGCATGGTGTGTGGGAC-----            | morL | 20 | 1     |
| -----AGCTGGTGTGTGAATCAGGCCG-----    | mirL | 23 | 35619 |
| -----AGCTGGTGTGTGAATCAGGCCGT-----   | mirL | 24 | 12816 |
| -----AGCTGGTGTGTGAATCAGGCCGTTG----- | mirL | 26 | 6389  |
| -----AGCTGGTGTGTGAATCAGGC-----      | mirL | 21 | 4181  |
| -----AGCTGGTGTGTGAATCAGGCCGTT-----  | mirL | 25 | 3528  |
| -----AGCTGGTGTGTGAATCAGGCC-----     | mirL | 22 | 2872  |
| -----AGCTGGTGTGTGAATCAGGCCGTTG----- | mirL | 27 | 2203  |
| -----GCTGGTGTGTGAATCAGGCCG-----     | mirL | 22 | 95    |
| -----CTGGTGTGTGAATCAGGCCG-----      | mirL | 21 | 13    |
| -----CAGCTGGTGTGTGAATCAGGCCGT-----  | mirL | 25 | 8     |
| -----GCTGGTGTGTGAATCAGGCCGT-----    | mirL | 23 | 8     |
| -----GCTGGTGTGTGAATCAGGC-----       | mirL | 20 | 7     |
| -----CAGCTGGTGTGTGAATCAGGCCG-----   | mirL | 24 | 7     |
| -----TGGTGTGTGTGAATCAGGCCGTT-----   | mirL | 22 | 3     |
| -----ACAGCTGGTGTGTGAATCAGGCCG-----  | mirL | 25 | 3     |
| -----ACAGCTGGTGTGTGAAT-----         | mirL | 18 | 2     |
| -----TGGTGTGTGAATCAGGCCGT-----      | mirL | 21 | 2     |
| -----GCTGGTGTGTGAATCAGGCCGTTG-----  | mirL | 25 | 2     |
| -----TGGTGTGTGAATCAGGCCGTTG-----    | mirL | 23 | 1     |
| -----CTGGTGTGTGAATCAGGCCGTTG-----   | mirL | 24 | 1     |
| -----GACAGCTGGTGTGTGAATCAGGCCG----- | mirL | 26 | 1     |
| -----CAGCTGGTGTGTGAATCAGGC-----     | mirL | 22 | 1     |
| -----TGGTGTGTGAATCAGGC-----         | mirL | 18 | 1     |
| -----GCTGGTGTGTGAATCAGGCC-----      | mirL | 21 | 1     |
| -----TTGCCAATCAGAGAACGG-----        | loop | 18 | 3     |
| -----GCCAATCAGAGAACGGCT-----        | loop | 18 | 1     |
| -----GCTACTTCACAACACCAGGGCC-----    | mirR | 22 | 2025  |
| -----GCTACTTCACAACACCAGGGC-----     | mirR | 21 | 1930  |
| -----CGGCTACTTCACAACACCAGGG-----    | mirR | 22 | 1183  |
| -----CGGCTACTTCACAACACCAG-----      | mirR | 20 | 319   |
| -----CGGCTACTTCACAACACCAGG-----     | mirR | 21 | 242   |
| -----GCTACTTCACAACACCAGGG-----      | mirR | 20 | 205   |
| -----CGGCTACTTCACAACACCAGGGC-----   | mirR | 23 | 190   |
| -----CGGCTACTTCACAACACCA-----       | mirR | 19 | 70    |
| -----GCTACTTCACAACACCAGGGCCA-----   | mirR | 23 | 60    |
| -----GCTACTTCACAACACCAGG-----       | mirR | 19 | 59    |
| -----GGCTACTTCACAACACCAGGG-----     | mirR | 21 | 39    |
| -----GCTACTTCACAACACCAG-----        | mirR | 18 | 37    |
| -----GGCTACTTCACAACACCAGGGC-----    | mirR | 22 | 29    |

```
-----CTACTTCACAACACCAGGGCC----- mirR 21 20
-----CGGCTACTTCACAACACC----- mirR 18 18
-----ACGGCTACTTCACAACAC----- mirR 18 10
-----TACTTCACAACACCAGGGCC----- mirR 20 9
-----ACTTCACAACACCAGGGCC----- mirR 19 9
-----ACGGCTACTTCACAACACCAG----- mirR 21 9
-----GCTACTTCACAACACCAGGGCCAC----- mirR 24 8
-----CGGCTACTTCACAACACCAGGGCC----- mirR 24 7
-----GGCTACTTCACAACACCAGGGCC----- mirR 23 2
-----ACTTCACAACACCAGGGCCAC----- mirR 21 2
-----TACTTCACAACACCAGGGCCA----- mirR 21 2
-----CTACTTCACAACACCAGGGCCA----- mirR 22 2
-----GGCTACTTCACAACACCA----- mirR 18 1
-----CTACTTCACAACACCAGG----- mirR 18 1
-----TACTTCACAACACCAGGGCCAC----- mirR 22 1
-----ACGGCTACTTCACAACACC----- mirR 19 1
-----CTACTTCACAACACCAGGG----- mirR 19 1
-----CACACTGCACTGCAAGCA----- morR 18 5
-----CACTGCACTGCAAGCAGCGA----- morR 20 2
-----CACACTGCACTGCAAGCAGCGAGCAAGCAAC morR 34 2
-----CACACTGCACTGCAAGCAGCG----- morR 21 1
-----ACTGCACTGCAAGCAGCG----- morR 18 1
-----GCCACACTGCACTGCAAG----- morR 18 1
-----CACACTGCACTGCAAGCAGCGAGCAAGC--- morR 31 1
-----CACTGCACTGCAAGCAGC----- morR 18 1
```

>mmu-mir-351

```
TCCCAAACCTCTGCTGTGATTAATCATGGCACCTCCGTTTCCCTGAGGAGCCCTTTGAGCCTGGAGTGAAAAAAAAAACAGGTCAAGAGGCGCCTGGGAACCTGGAGAAGAGTGTTAACTTCTGGAGCAAGAC species
TCCCAAACCTCTGCTGTGATTAATCATGGCACCTCC----- morL 35
-----ATCATGGCACCTCCGTTT----- morL 18
-----TCATGGCACCTCCGTTTC----- morL 18
-----CATGGCACCTCCGTTTCC----- morL 18
-----ATTAATCATGGCACCTCCGTT----- morL 21
-----AATCATGGCACCTCCGTT----- morL 19
-----TCCCTGAGGAGCCCTTTGAGCCTGG----- mirL 25
-----TCCCTGAGGAGCCCTTTGAGCCTG----- mirL 24
-----TCCCTGAGGAGCCCTTTGAGCCTGGAG----- mirL 27
-----TCCCTGAGGAGCCCTTTGAGCCTGGA----- mirL 26
-----TCCCTGAGGAGCCCTTTGAGCCT----- mirL 23
-----TCCCTGAGGAGCCCTTTGAGCC----- mirL 22
-----TCCCTGAGGAGCCCTTTGAGC----- mirL 21
-----CCCTGAGGAGCCCTTTGAGCCTGG----- mirL 24
-----CCCTGAGGAGCCCTTTGAGCCTG----- mirL 23
-----CCCTGAGGAGCCCTTTGAGCCTGGAG----- mirL 26
-----CCTGAGGAGCCCTTTGAGCCTGG----- mirL 23
-----CCCTGAGGAGCCCTTTGAGCCT----- mirL 22
```

```

-----CCCTGAGGAGCCCTTTGAGCCTGGA----- mirL 25
-----CCTGAGGAGCCCTTTGAGCCTG----- mirL 22
-----CTGAGGAGCCCTTTGAGCCTG----- mirL 21
-----TTCCCTGAGGAGCCCTTTGAGCCTGG----- mirL 26
-----CTGAGGAGCCCTTTGAGCCTGG----- mirL 22
-----CCCTGAGGAGCCCTTTGA----- mirL 18
-----CCCTGAGGAGCCCTTTGAGCCTGGAGT----- mirL 27
-----TTCCCTGAGGAGCCCTTTGAGCCTG----- mirL 25
-----CCTGAGGAGCCCTTTGAG----- mirL 18
-----CTGAGGAGCCCTTTGAGC----- mirL 18
-----TTCCCTGAGGAGCCCTTT----- mirL 18
-----TTCCCTGAGGAGCCCTTTGAGC----- mirL 22
-----TTCCCTGAGGAGCCCTTTGAGCC----- mirL 23
-----TTCCCTGAGGAGCCCTTTGAG----- mirL 21
-----TTCCCTGAGGAGCCCTTTGAGCCT----- mirL 25
-----GGAGTGAAAAAAAAAACAG----- loop 20
-----GAGTGAAAAAAAAAACAG----- loop 19
-----GAGTGAAAAAAAAAACA----- loop 18
-----TGAAAAAAAAAACAGGT----- loop 18
-----AGTGAAAAAAAAAACAG----- loop 18
-----TGGAGTGAAAAAAAAA----- loop 18
-----GGTCAAGAGGCGCCTGGGAAC----- mirR 21
-----GGTCAAGAGGCGCCTGGGAACT----- mirR 22
-----GGTCAAGAGGCGCCTGGGAACTG----- mirR 23
-----GTCAAGAGGCGCCTGGGAACT----- mirR 21
-----GGTCAAGAGGCGCCTGGGA----- mirR 20
-----GGTCAAGAGGCGCCTGGGAACTGG----- mirR 24
-----GTCAAGAGGCGCCTGGGAAC----- mirR 20
-----GTCAAGAGGCGCCTGGGAACTG----- mirR 22
-----TCAAGAGGCGCCTGGGAACTGG----- mirR 22
-----CAAGAGGCGCCTGGGAAC----- mirR 18
-----GGTCAAGAGGCGCCTGGGAACTGGA----- mirR 25
-----GTCAAGAGGCGCCTGGGAACTGG----- mirR 23
-----CAGGTCAAGAGGCGCCTG----- mirR 18
-----TGGAGAAGAGTGTTAAACTTCTGGAGCAAGAC morR 32
-----AACTGGAGAAGAGTGTTA----- morR 18
-----TGGAGAAGAGTGTTAAACTTCTGGAGC----- morR 27
-----AGAAGAGTGTTAAACTTC----- morR 18
-----ACTGGAGAAGAGTGTTAA----- morR 18
-----TGGAGAAGAGTGTTAAACTTCTGGA----- morR 25
-----ACTGGAGAAGAGTGTTAAA----- morR 19
-----TGGAGAAGAGTGTTAAACTTCTGGAGCAAG-- morR 30

```

>mmu-mir-652

```

ATGAAGGGCCTCCAGGAACAGCTATGTACTGCACAACCCCTAGGAGGGGGTGCCATTCACATAGAGTATAATGAATGGCGCCACTAGGGTTGTGCAGTGTACAGCCTACACAACCTCTACGCGGCGATCC species le
-----GGAACAGCTATGTACTGCA----- morL 19 88

```



```

-----CCTCCAGGAACAGCTATGTACTGCA----- morL 25 42
-----AGGAACAGCTATGTACTGCA----- morL 20 29
-----GAACAGCTATGTACTGCA----- morL 18 28
-----AACAGCTATGTACTGCAC----- morL 18 19
-----CAGGAACAGCTATGTACTGCA----- morL 21 11
-----GGAACAGCTATGTACTGCAC----- morL 20 7
-----GAACAGCTATGTACTGCAC----- morL 19 5
-----GCCTCCAGGAACAGCTATGTACTGCA----- morL 26 2
-----CTCCAGGAACAGCTATGTACTGCA----- morL 24 2
-----CAGCTATGTACTGCACAA----- morL 18 1
-----CCTCCAGGAACAGCTATGTACTGCACA----- morL 27 1
-----GGAACAGCTATGTACTGC----- morL 18 1
-----AGGAACAGCTATGTACTGCAC----- morL 21 1
-----AGGAACAGCTATGTACTG----- morL 18 1
ATGAAGGGCCTCCAGGAACAGCTATGTACTGC----- morL 32 1
-----CAGGAACAGCTATGTACTG----- morL 19 1
-----AACAGCTATGTACTGCACAA----- morL 20 1
-----AACAGCTATGTACTGCACA----- morL 19 1
-----CCAGGAACAGCTATGTACTG----- morL 20 1
-----CAACCCTAGGAGGGGGTGCCATTCA----- mirL 25 437
-----CAACCCTAGGAGGGGGTGCCATT----- mirL 24 185
-----CAACCCTAGGAGGGGGTGCCATT----- mirL 23 966
-----CAACCCTAGGAGGGGGTGCCAT----- mirL 22 259
-----CAACCCTAGGAGGGGGTGCCATTCACA----- mirL 27 105
-----CAACCCTAGGAGGGGGTGCCATTCAC----- mirL 26 85
-----CAACCCTAGGAGGGGGTGCCA----- mirL 21 68
-----AACCCCTAGGAGGGGGTGCCATT----- mirL 23 13
-----AACCCCTAGGAGGGGGTGCCATTCACA----- mirL 26 6
-----ACCCTAGGAGGGGGTGCCATTCACA----- mirL 25 4
-----CCCTAGGAGGGGGTGCCA----- mirL 18 3
-----ACCCTAGGAGGGGGTGCCAT----- mirL 20 2
-----AACCCCTAGGAGGGGGTGCCATTCA----- mirL 24 2
-----CACAAACCCTAGGAGGGGG----- mirL 18 1
-----ACAACCCTAGGAGGGGGTGCCA----- mirL 22 1
-----ACAACCCTAGGAGGGGGT----- mirL 18 1
-----ACAACCCTAGGAGGGGGTGCCATTCA----- mirL 26 1
-----AACCCCTAGGAGGGGGTGTC----- mirL 18 1
-----AATGGCGCCACTAGGGTTGTG----- mirR 21 352
-----AATGGCGCCACTAGGGTTGTGC----- mirR 22 139
-----AATGGCGCCACTAGGGTTGT----- mirR 20 706
-----AATGGCGCCACTAGGGTTGTGCA----- mirR 23 182
-----AATGGCGCCACTAGGGTTGT----- mirR 19 137
-----AATGGCGCCACTAGGGTTGTGCAG----- mirR 24 840
-----GGCGCCACTAGGGTTGTG----- mirR 18 446
-----ATGGCGCCACTAGGGTTGTG----- mirR 20 348
-----AATGGCGCCACTAGGGTT----- mirR 18 231

```

```

-----TGGCGCCACTAGGGTTGTG----- mirR 19 157
-----ATGGCGCCACTAGGGTTGTGC----- mirR 21 139
-----ATGGCGCCACTAGGGTTGTGCA----- mirR 22 72
-----TGAATGGCGCCACTAGGGTTGT----- mirR 22 60
-----ATGGCGCCACTAGGGTTGTGCAG----- mirR 23 49
-----GAATGGCGCCACTAGGGTTGTGC----- mirR 23 44
-----GAATGGCGCCACTAGGGTTGTG----- mirR 22 35
-----GAATGGCGCCACTAGGGTTGT----- mirR 21 30
-----TGAATGGCGCCACTAGGGTTGTGC----- mirR 24 25
-----TGAATGGCGCCACTAGGGTTGTG----- mirR 23 25
-----ATGGCGCCACTAGGGTTGT----- mirR 19 24
-----GGCGCCACTAGGGTTGTGCA----- mirR 20 18
-----ATGGCGCCACTAGGGTTG----- mirR 18 18
-----TGAATGGCGCCACTAGGGTTG----- mirR 21 16
-----TTGAATGGCGCCACTAGGGTT----- mirR 21 12
-----GAATGGCGCCACTAGGGTTGTGCA----- mirR 24 10
-----GAATGGCGCCACTAGGGTTG----- mirR 20 7
-----TGGCGCCACTAGGGTTGTGC----- mirR 20 7
-----TGAATGGCGCCACTAGGGTTGTGCA----- mirR 25 6
-----GGCGCCACTAGGGTTGTGC----- mirR 19 6
-----TGGCGCCACTAGGGTTGTGCA----- mirR 21 5
-----GAATGGCGCCACTAGGGTTGTGCAG----- mirR 25 4
-----TGAATGGCGCCACTAGGGTTGTGCAG----- mirR 26 4
-----ATGGCGCCACTAGGGTTGTGCAGT----- mirR 24 2
-----TGGCGCCACTAGGGTTGT----- mirR 18 2
-----CAGTGTACAGCCTACACAACCTCTACGCGGCGATCC morR 35 59
-----CAGTGTACAGCCTACACAACCTCTACG----- morR 26 24
-----CAGTGTACAGCCTACACAACCTCTACGCGGC----- morR 30 16
-----CAGTGTACAGCCTACACAACCTCTACGCGG----- morR 29 9
-----CAGTGTACAGCCTACACAACCTCTACGCG----- morR 28 9
-----CAGTGTACAGCCTACACAACCTCTACGC----- morR 27 8
-----CAGTGTACAGCCTACACAACCTCTACGCGGCGA----- morR 32 7
-----GTGTACAGCCTACACAAC----- morR 18 4
-----AGTGTACAGCCTACACAA----- morR 18 3
-----GTGCAGTGTACAGCCTACAC----- morR 20 2
-----GTGCAGTGTACAGCCTAC----- morR 18 1

```

>mmu-mir-877

```

CACTGCTGCTGAGAACTAGAAAAGGTAGAGGAGATGGCGCAGGGGACACAAGGTAGGCCTTGCGGGTCTGTGGACCTTGGACATGTGTCCTTCTCCCTCCTCCAGGTGTATGAGGAACTGCGA species len
-----GCTGAGAACTAGAAAAG----- morL 18 2
----GCTGCTGAGAACTAGAAA----- morL 18 2
-----TGAGAACTAGAAAAGGT----- morL 18 2
-----GAGAACTAGAAAAGGTA----- morL 18 1
-----TGCTGAGAACTAGAAAA----- morL 18 1
CACTGCTGCTGAGAACTAGAAAAG----- morL 25 1
----GCTGCTGAGAACTAGAAA----- morL 19 1

```

```

-----GTAGAGGAGATGGCGCAGGGGACA----- mirL 24 4552
-----GTAGAGGAGATGGCGCAGGGGAC----- mirL 23 1357
-----GTAGAGGAGATGGCGCAGGGGA----- mirL 22 1064
-----GTAGAGGAGATGGCGCAGGGGACACA----- mirL 26 886
-----GTAGAGGAGATGGCGCAGGGGACAC----- mirL 25 755
-----GTAGAGGAGATGGCGCAGGGG----- mirL 21 243
-----GTAGAGGAGATGGCGCAGGGGACACAA----- mirL 27 238
-----TAGAGGAGATGGCGCAGGGGACA----- mirL 23 51
-----TAGAGGAGATGGCGCAGGGGACACA----- mirL 25 46
-----AGAGGAGATGGCGCAGGGGACACA----- mirL 24 45
-----TAGAGGAGATGGCGCAGGGGACAC----- mirL 24 42
-----AGAGGAGATGGCGCAGGGGACA----- mirL 22 18
-----TAGAGGAGATGGCGCAGGGGAC----- mirL 22 16
-----AGAGGAGATGGCGCAGGG----- mirL 18 12
-----TAGAGGAGATGGCGCAGGGGACACAA----- mirL 26 12
-----TAGAGGAGATGGCGCAGGGGA----- mirL 21 8
-----AGAGGAGATGGCGCAGGGGACAC----- mirL 23 4
-----TAGAGGAGATGGCGCAGGG----- mirL 19 4
-----GAGGAGATGGCGCAGGGGAC----- mirL 20 2
-----AGGTAGAGGAGATGGCGCAGGG----- mirL 22 1
-----GGTAGAGGAGATGGCGCA----- mirL 18 1
-----AAGGTAGAGGAGATGGCG----- mirL 18 1
-----GGTAGAGGAGATGGCGCAGGGGACAC----- mirL 26 1
-----AGGTAGAGGAGATGGCGCAGGGGACACA----- mirL 28 1
-----AGGTAGAGGAGATGGCGCA----- mirL 19 1
-----AAGGTAGAGGAGATGGCGCA----- mirL 20 1
-----TCCTCTTCTCCCTCCTCCCAGG----- mirR 22 1035
-----TGTCCCTCTTCTCCCTCCTCCCAGG----- mirR 24 1002
-----TGTCCCTCTTCTCCCTCCTCCCAG----- mirR 23 9768
-----TGTCCCTCTTCTCCCTCCTCCCA----- mirR 22 9656
-----TCCTCTTCTCCCTCCTCCCAG----- mirR 21 8766
-----TGTCCCTCTTCTCCCTCCTCCCAGGT----- mirR 25 3259
-----TCCTCTTCTCCCTCCTCCCAGGT----- mirR 23 1550
-----TGTCCCTCTTCTCCCTCCTCCC----- mirR 21 1461
-----TCCTCTTCTCCCTCCTCCCA----- mirR 20 1190
-----TGTCCCTCTTCTCCCTCCTCCCAGGTG----- mirR 26 1041
-----TCCTCTTCTCCCTCCTCCCAGGTG----- mirR 24 851
-----TGTCCCTCTTCTCCCTCCTCC----- mirR 20 549
-----GTCCTCTTCTCCCTCCTCCCAGG----- mirR 23 368
-----GTCCTCTTCTCCCTCCTCCCA----- mirR 21 323
-----GTCCTCTTCTCCCTCCTCCCAG----- mirR 22 247
-----TCCTCTTCTCCCTCCTCCC----- mirR 19 204
-----CCTCTTCTCCCTCCTCCCAGG----- mirR 21 171
-----GTCCTCTTCTCCCTCCTCCCAGGT----- mirR 24 132
-----CCTCTTCTCCCTCCTCCCAG----- mirR 20 129
-----CTCTTCTCCCTCCTCCCAG----- mirR 19 78

```

```

-----TCCTCTTCTCCCTCCTCC----- mirR 18 71
-----CCTCTTCTCCCTCCTCCAGGT----- mirR 22 70
-----CTCTTCTCCCTCCTCCCA----- mirR 18 53
-----CCTCTTCTCCCTCCTCCCA----- mirR 19 53
-----CCTCTTCTCCCTCCTCCAGGTG----- mirR 23 42
-----GTCCTCTTCTCCCTCCTCC----- mirR 20 34
-----GTCCTCTTCTCCCTCCTCCAGGTG----- mirR 25 32
-----TCTTCTCCCTCCTCCAG----- mirR 18 21
-----GTCCTCTTCTCCCTCCTCC----- mirR 19 19
-----CCTCTTCTCCCTCCTCC----- mirR 18 17
-----GTGTCTCTTCTCCCTCCTCCCA----- mirR 23 13
-----TCTTCTCCCTCCTCCAGG----- mirR 19 12
-----GTGTCTCTTCTCCCTCC----- mirR 18 5
-----GTGTCTCTTCTCCCTCCT----- mirR 19 2
-----GTGTCTCTTCTCCCTCCTC----- mirR 20 2
-----CTCTTCTCCCTCCTCCAGGTG----- mirR 22 1
-----CCTCTTCTCCCTCCTCCAGGTGT----- mirR 24 1
-----CTCTTCTCCCTCCTCCAGG----- mirR 20 1
-----GTGTATGAGGAAGTCCGA morR 18 1

```

>mmu-mir-374

| CTCTGAAGAAATCCTACTCGGGTGGATATAATAACAACCTGCTAAGTGTCTAGCACTTAGCAGGTTGTATTATCATTGTCGAGGTTATGGCTCTCGTCTAT | species | len | reads |
|-------------------------------------------------------------------------------------------------------|---------|-----|-------|
| ---TGAAGAAATCCTACTCGGGTGG                                                                             | morL    | 22  | 8     |
| ---AAGAAATCCTACTCGGGTGG                                                                               | morL    | 20  | 4     |
| ---GAAGAAATCCTACTCGGGTGG                                                                              | morL    | 21  | 3     |
| --CTGAAGAAATCCTACTCGGGTGG                                                                             | morL    | 23  | 3     |
| CTCTGAAGAAATCCTACTCGGGTGG                                                                             | morL    | 25  | 2     |
| ---AGAAATCCTACTCGGGTGG                                                                                | morL    | 18  | 1     |
| ---GAAGAAATCCTACTCGGG                                                                                 | morL    | 18  | 1     |
| ---AGAAATCCTACTCGGGTGG                                                                                | morL    | 20  | 1     |
| ---AAGAAATCCTACTCGGGTGG                                                                               | morL    | 21  | 1     |
| -----ATATAATACAACCTGCTAAGTG                                                                           | mirL    | 22  | 39566 |
| -----ATATAATACAACCTGCTAAGTGT                                                                          | mirL    | 23  | 15104 |
| -----ATATAATACAACCTGCTAAGT                                                                            | mirL    | 21  | 4048  |
| -----ATATAATACAACCTGCTAAG                                                                             | mirL    | 20  | 1186  |
| -----ATATAATACAACCTGCTAAGTGT                                                                          | mirL    | 24  | 394   |
| -----ATATAATACAACCTGCTAA                                                                              | mirL    | 19  | 283   |
| -----ATATAATACAACCTGCTAAGTGTTC                                                                        | mirL    | 25  | 131   |
| -----TATAATACAACCTGCTAAGTG                                                                            | mirL    | 21  | 78    |
| -----TATAATACAACCTGCTAAGT                                                                             | mirL    | 20  | 22    |
| -----TAATACAACCTGCTAAGTGTCT                                                                           | mirL    | 23  | 21    |
| -----TATAATACAACCTGCTAAGTGT                                                                           | mirL    | 23  | 18    |
| -----ATAATACAACCTGCTAAGTGT                                                                            | mirL    | 21  | 14    |
| -----GATATAATACAACCTGCTAAGTG                                                                          | mirL    | 23  | 11    |
| -----TATAATACAACCTGCTAAGTGT                                                                           | mirL    | 22  | 11    |
| -----GATATAATACAACCTGCTAAGT                                                                           | mirL    | 22  | 10    |

```

-----GGATATAATACAACCTGCTAAGTG----- mirL 24 9
-----TATAATACAACCTGCTAAG----- mirL 19 6
-----TAATACAACCTGCTAAGTGTTTC----- mirL 22 3
-----GATATAATACAACCTGCTAAG----- mirL 21 2
-----TAATACAACCTGCTAAGTGT----- mirL 20 2
-----GATATAATACAACCTGCTAAGTGT----- mirL 24 2
-----GATATAATACAACCTGCT----- mirL 18 1
-----GGTTGTATTATCATTGTCCGA----- mirR 21 3931
-----GGTTGTATTATCATTGTCCG----- mirR 20 3131
-----GGTTGTATTATCATTGTCC----- mirR 19 728
-----GGTTGTATTATCATTGTCCGAG----- mirR 22 531
-----GGTTGTATTATCATTGTCC----- mirR 18 330
-----GTTGTATTATCATTGTCCG----- mirR 19 57
-----GTTGTATTATCATTGTCCGA----- mirR 20 24
-----GTTGTATTATCATTGTCCGAG----- mirR 21 21
-----TTGTATTATCATTGTCCG----- mirR 18 11
-----TTGTATTATCATTGTCCGA----- mirR 19 8
-----GGTTGTATTATCATTGTCCGAGG----- mirR 23 7
-----AGGTTGTATTATCATTGTCCG----- mirR 21 6
-----GTTGTATTATCATTGTCC----- mirR 18 4
-----AGGTTGTATTATCATTGTCCGA----- mirR 22 3
-----AGGTTGTATTATCATTGTCCGAG----- mirR 23 3
-----GTTATGGCTCTCGTCTAT morR 18 3
-----GAGGTTATGGCTCTCGTCT-- morR 19 1
-----AGGTTATGGCTCTCGTCT-- morR 18 1

>mmu-mir-149
GCCCTCAGGCCAGTGCCAGGCTCTGGCTCCGTGTCTTCACTCCCGTGTGGTCCGAGGAGGGAGGGACGGGGGCGGTGCTGGGGCAACTGGAACAGC species len reads
-CCCTCAGGCCAGTGCCAGGCT----- morL 22 1
GCCCTCAGGCCAGTGCCCA----- morL 19 1
-----TCTGGCTCCGTGTCTTCACTCCC----- mirL 23 32624
-----TCTGGCTCCGTGTCTTCACTCC----- mirL 22 18366
-----TCTGGCTCCGTGTCTTCACTCCG----- mirL 24 7695
-----TCTGGCTCCGTGTCTTCACTC----- mirL 21 4391
-----TCTGGCTCCGTGTCTTCACTCCCGT----- mirL 25 2350
-----TCTGGCTCCGTGTCTTCACT----- mirL 20 1047
-----TCTGGCTCCGTGTCTTCACTCCCGTG----- mirL 26 784
-----CTGGCTCCGTGTCTTCACTCCC----- mirL 22 749
-----CTGGCTCCGTGTCTTCACTCC----- mirL 21 432
-----CTGGCTCCGTGTCTTCACTCCCG----- mirL 23 226
-----CTGGCTCCGTGTCTTCACTC----- mirL 20 103
-----GGCTCCGTGTCTTCACTCCC----- mirL 20 73
-----CTGGCTCCGTGTCTTCACTCCCGT----- mirL 24 56
-----TGGCTCCGTGTCTTCACTCCC----- mirL 21 51
-----GGCTCCGTGTCTTCACTCC----- mirL 19 30
-----CTGGCTCCGTGTCTTCACTCCCGTG----- mirL 25 23

```

```

-----CTCTGGCTCCGTGTCTTCACTCCC----- mirL 24 21
-----CTGGCTCCGTGTCTTCACT----- mirL 19 18
-----TGGCTCCGTGTCTTCACTCC----- mirL 20 17
-----GGCTCCGTGTCTTCACTC----- mirL 18 9
-----CTCTGGCTCCGTGTCTTCACTCC----- mirL 23 8
-----TGGCTCCGTGTCTTCACT----- mirL 18 3
-----TGGCTCCGTGTCTTCACTC----- mirL 19 3
-----GCTCTGGCTCCGTGTCTTCACTCCC----- mirL 25 1
-----GGCTCCGTGTCTTCACTCCCG----- mirL 21 1
-----GTGTTTGTCCGAGGAGGG----- loop 18 14
-----CCCGTGTTTGTCCGAGGAG----- loop 19 1
-----GTGTTTGTCCGAGGAGGGA----- loop 19 1
-----GAGGGAGGGACGGGGCGGTGC----- mirR 22 154
-----GAGGGAGGGACGGGGCGGTG----- mirR 21 27
-----GAGGGAGGGACGGGGCGGTGCTG----- mirR 24 15
-----AGGGAGGGACGGGGCGGTG----- mirR 20 10
-----GAGGGAGGGACGGGGCGGTGCTGG----- mirR 25 4
-----AGGGAGGGACGGGGCGGTGC----- mirR 21 3
-----GAGGGAGGGACGGGGCGGTGCT----- mirR 23 3
-----GGGAGGGACGGGGCGGT----- mirR 18 2
-----GGGAGGGAGGGACGGGG----- mirR 18 2
-----AGGGAGGGAGGGACGGGG----- mirR 19 2
-----AGGGAGGGACGGGGCGG----- mirR 18 2
-----AGGGAGGGAGGGACGGGG----- mirR 18 2
-----GAGGGAGGGACGGGGCGC----- mirR 18 2
-----GGGAGGGACGGGGCGGTGC----- mirR 20 1
-----AGGGAGGGACGGGGCGGT----- mirR 19 1
-----GAGGGAGGGACGGGGCGGTGCTGG----- mirR 26 1
-----TGGGGCAACTGGAACAGC morR 18 2
-----GCTGGGGCAACTGGAACA-- morR 18 1

```

>mmu-mir-186

```

CCCAAACATTTAATTGCTTACAACCTTCCAAAGAATTCTCCTTTTGGGCTTCTCATTATTTTAAAGCCCTAAGGTGAATTTTTGGGAAGTTTGGCTAAATGCCTTC species len reads
-----ATTGCTTACAACCTTCCA----- morL 18 3
-----AATTGCTTACAACCTTCC----- morL 18 1
CCCAAACATTTAATTGCTTACAACCTTCC----- morL 29 1
-----TAATTGCTTACAACCTTCC----- morL 18 1
-----CAAAGAATTCTCCTTTTGGGCTT----- mirL 23 22545
-----CAAAGAATTCTCCTTTTGGGCT----- mirL 22 18417
-----CAAAGAATTCTCCTTTTGGGCTTT----- mirL 24 5448
-----CAAAGAATTCTCCTTTTGGGCTTTC----- mirL 25 3097
-----CAAAGAATTCTCCTTTTGGGC----- mirL 21 2368
-----CCAAAGAATTCTCCTTTTGGGCT----- mirL 23 881
-----CAAAGAATTCTCCTTTTGGG----- mirL 20 702
-----CAAAGAATTCTCCTTTTGGGCTTCT----- mirL 26 535
-----AAAGAATTCTCCTTTTGGGCTT----- mirL 22 377

```

```

-----CCAAAGAATTCTCCTTTTGGGCTT----- mirL 24 348
-----CCAAAGAATTCTCCTTTTGGGC----- mirL 22 270
-----CCAAAGAATTCTCCTTTTGGGCTTT----- mirL 25 144
-----AAAGAATTCTCCTTTTGGGCTTT----- mirL 23 116
-----AAAGAATTCTCCTTTTGGGCT----- mirL 21 99
-----AAAGAATTCTCCTTTTGGGCTTTC----- mirL 24 53
-----AAGAATTCTCCTTTTGGGCT----- mirL 20 51
-----CCAAAGAATTCTCCTTTTGGGCTTTC----- mirL 26 37
-----AAGAATTCTCCTTTTGGGCTTT----- mirL 22 28
-----AAGAATTCTCCTTTTGGGCTT----- mirL 21 20
-----CCAAAGAATTCTCCTTTTGGGCTTTCT----- mirL 27 19
-----CCAAAGAATTCTCCTTTTGGG----- mirL 21 18
-----AAAGAATTCTCCTTTTGGGC----- mirL 20 14
-----AAGAATTCTCCTTTTGGGC----- mirL 19 11
-----AGAATTCTCCTTTTGGGCTT----- mirL 20 6
-----AAAGAATTCTCCTTTTGGGCTTTCT----- mirL 25 5
-----AGAATTCTCCTTTTGGGCT----- mirL 19 5
-----TCCAAAGAATTCTCCTTTTGGGCT----- mirL 24 4
-----AAAGAATTCTCCTTTTGG----- mirL 18 2
-----AAGAATTCTCCTTTTGGG----- mirL 18 2
-----AGAATTCTCCTTTTGGGCTTT----- mirL 21 1
-----AAGAATTCTCCTTTTGGGCTTTC----- mirL 23 1
-----TTTCTCATTTTATTTTAAGC----- loop 20 15
-----CTTTCTCATTTTATTTTAAGCC----- loop 22 8
-----GCCCTAAGGTGAATTTTTTGGG----- mirR 22 5875
-----GCCCTAAGGTGAATTTTTTGGGA----- mirR 23 4127
-----CCCTAAGGTGAATTTTTTGGGA----- mirR 22 1169
-----GCCCTAAGGTGAATTTTTTGG----- mirR 21 791
-----CCCTAAGGTGAATTTTTTGGGAA----- mirR 23 250
-----CCTAAGGTGAATTTTTTGGGAA----- mirR 22 249
-----CCTAAGGTGAATTTTTTGGGA----- mirR 21 241
-----GCCCTAAGGTGAATTTTTTGGGAA----- mirR 24 165
-----CCCTAAGGTGAATTTTTTGGG----- mirR 21 160
-----GCCCTAAGGTGAATTTTTTGGGAAG----- mirR 25 101
-----CCCTAAGGTGAATTTTTTGG----- mirR 20 86
-----AGCCCTAAGGTGAATTTTTTGG----- mirR 22 78
-----CCTAAGGTGAATTTTTTGGGAAG----- mirR 23 67
-----CCCTAAGGTGAATTTTTTGGGAAG----- mirR 24 59
-----GCCCTAAGGTGAATTTTTTGG----- mirR 20 52
-----GCCCTAAGGTGAATTTTTTGGGAAGT----- mirR 26 21
-----AGCCCTAAGGTGAATTTTTTGGG----- mirR 23 17
-----CCTAAGGTGAATTTTTTGGG----- mirR 20 13
-----CCTAAGGTGAATTTTTTGGGAAGT----- mirR 24 10
-----CTAAGGTGAATTTTTTGGGAA----- mirR 21 6
-----CTAAGGTGAATTTTTTGGG----- mirR 19 6
-----CCTAAGGTGAATTTTTTGG----- mirR 19 5

```

```

-----CTAAGGTGAATTTTTGGGAAG----- mirR 22 4
-----CCCTAAGGTGAATTTTTGGGAAGT----- mirR 25 4
-----CCTAAGGTGAATTTTTGGGAAGTT----- mirR 25 1
-----CTAAGGTGAATTTTTGG----- mirR 18 1
-----AAGCCCTAAGGTGAATTT----- mirR 18 1
-----AAGTTTGAGCTAAATGCCTTC morR 21 1
-----GAAGTTTGAGCTAAATGCCT-- morR 20 1

```

>mmu-mir-329

```

CGCTTCTGGTACCGGAAGAGAGGTTTTCTGGGTCTCTGTTTCTTTGATGAGAATGAAACACACCCAGCTAACCTTTTTTTT species len reads
CGCTTCTGGTACCGGAAG----- morL 18 2
-----AGAGGTTTTCTGGGTCTCTGTTT----- mirL 23 2200
-----AGAGGTTTTCTGGGTCTCTGTTTC----- mirL 24 2011
-----AGAGGTTTTCTGGGTCTCTGTTTCT----- mirL 25 1035
-----GAGGTTTTCTGGGTCTCTGTTTC----- mirL 23 194
-----AGAGGTTTTCTGGGTCTCTGT----- mirL 21 192
-----GAGGTTTTCTGGGTCTCTGTTT----- mirL 22 187
-----AGAGGTTTTCTGGGTCTCTGTT----- mirL 22 179
-----GAGGTTTTCTGGGTCTCTGTTTCT----- mirL 24 82
-----AGAGGTTTTCTGGGTCTCT----- mirL 19 36
-----AGAGGTTTTCTGGGTCTCTGTTTCTT----- mirL 26 34
-----AGGTTTTCTGGGTCTCTGTTTC----- mirL 22 32
-----GAGGTTTTCTGGGTCTCTGTT----- mirL 21 7
-----GGTTTTCTGGGTCTCTGTT----- mirL 19 7
-----AGGTTTTCTGGGTCTCTGTTT----- mirL 21 6
-----AGGTTTTCTGGGTCTCTGTTTCT----- mirL 23 5
-----GAGGTTTTCTGGGTCTCTGTTTCTT----- mirL 25 3
-----GAGGTTTTCTGGGTCTCTGT----- mirL 20 3
-----AGGTTTTCTGGGTCTCTG----- mirL 18 2
-----AGAGAGGTTTTCTGGGTCTCTGTTT----- mirL 25 2
-----GAGAGGTTTTCTGGGTCTCTGTTT----- mirL 24 2
-----AAGAGAGGTTTTCTGGGTCTC----- mirL 21 1
-----GGTTTTCTGGGTCTCTGTTTCT----- mirL 22 1
-----GGTTTTCTGGGTCTCTGT----- mirL 18 1
-----GAGGTTTTCTGGGTCTCTG----- mirL 19 1
-----GAGAGGTTTTCTGGGTCT----- mirL 18 1
-----TCTTTGATGAGAATGAAA----- loop 18 35
-----TCTTTGATGAGAATGAAAC----- loop 19 1
-----CTTTGATGAGAATGAAAC----- loop 18 1
-----AACACACCCAGCTAACCTTTTT-- mirR 22 34540
-----AACACACCCAGCTAACCTTTTT-- mirR 21 14684
-----AACACACCCAGCTAACCTTTTT-- mirR 23 5588
-----AACACACCCAGCTAACCTTT----- mirR 20 2907
-----AACACACCCAGCTAACCTT----- mirR 19 954
-----ACACACCCAGCTAACCTTTTT-- mirR 21 806
-----ACACACCCAGCTAACCTTTTT-- mirR 22 639

```



```

-----AACACACCCAGCTAACCTTTTTTT- mirR 24 370
-----AACACACCCAGCTAACCT----- mirR 18 209
-----ACACACCCAGCTAACCTTTT---- mirR 20 193
-----ACACACCCAGCTAACCTTTTTTT- mirR 23 179
-----AAACACACCCAGCTAACCTTT---- mirR 21 116
-----AAACACACCCAGCTAACCTTTTT-- mirR 22 100
-----ACACACCCAGCTAACCTTT---- mirR 19 92
-----ACACACCCAGCTAACCTTTTTTTC mirR 24 51
-----GAAACACACCCAGCTAACCTTT---- mirR 22 39
-----ACACCCAGCTAACCTTTTT---- mirR 18 36
-----ACACACCCAGCTAACCTT----- mirR 18 27
-----AAACACACCCAGCTAACCTTTTT-- mirR 23 24
-----ACACCCAGCTAACCTTTTT---- mirR 19 20
-----CACACCCAGCTAACCTTTTTTT-- mirR 20 11
-----CACACCCAGCTAACCTTTTTTTT- mirR 22 9
-----CACACCCAGCTAACCTTTTT---- mirR 19 7
-----CACACCCAGCTAACCTTTTTTT-- mirR 21 5
-----AAACACACCCAGCTAACCTT----- mirR 20 5
-----GAAACACACCCAGCTAACCTTT---- mirR 23 4
-----AAACACACCCAGCTAACCC----- mirR 18 2
-----AAACACACCCAGCTAACCTTTTTTT-- mirR 24 2
-----GAAACACACCCAGCTAAC----- mirR 18 2
-----AAACACACCCAGCTAACCTTTTTTTC mirR 26 1
-----TGAAACACACCCAGCTAA----- mirR 18 1

```

>mmu-mir-148a

```

GTTTGGTCTTTTGAGACAAAGTTCTGAGACTCCGACTCTGAGTATGATAGAAGTCAGTGCACACTACAGAACCTTGTCTCTAGAGGCTGTGGTCGCCGCTCCCCGCAAG species len reads
-TTTGGTCTTTTGAGACAA----- morL 18 2
GTTTGGTCTTTTGAGACA----- morL 18 1
-----AAAGTTCTGAGACTCCGACT----- mirL 22 629
-----AAAGTTCTGAGACTCCGACTC----- mirL 23 125
-----AAAGTTCTGAGACTCCGAC----- mirL 21 86
-----AAAGTTCTGAGACTCCGA----- mirL 20 60
-----CAAAGTTCTGAGACTCCGACT----- mirL 23 39
-----AGTTCTGAGACTCCGACT----- mirL 20 28
-----AAAGTTCTGAGACTCCG----- mirL 19 23
-----CAAAGTTCTGAGACTCCGAC----- mirL 22 20
-----CAAAGTTCTGAGACTCCGA----- mirL 21 17
-----AAAGTTCTGAGACTCC----- mirL 18 13
-----AAGTTCTGAGACTCCGACT----- mirL 21 13
-----GTTCTGAGACTCCGACT----- mirL 19 13
-----AAAGTTCTGAGACTCCGACTCT----- mirL 24 9
-----CAAAGTTCTGAGACTCCGACTC----- mirL 24 9
-----CAAAGTTCTGAGACTCCG----- mirL 20 8
-----CAAAGTTCTGAGACTC----- mirL 18 7
-----GACAAAGTTCTGAGACT----- mirL 19 5

```

C:\Documents and Settings\hong\Desktop\Reprogramming-total RNA.txt

```
-----ACAAAGTTCTGAGACACT----- mirL 18 5
-----AGTTCTGAGACACTCCGA----- mirL 18 3
-----GTTCTGAGACACTCCGACTC----- mirL 20 1
-----AAGTTCTGAGACACTCCGACTC----- mirL 22 1
-----AAGTTCTGAGACACTCCG----- mirL 18 1
-----CAAAGTTCTGAGACACTCC----- mirL 19 1
-----AAGTTCTGAGACACTCCGAC----- mirL 20 1
-----ACAAAGTTCTGAGACACTCC----- mirL 20 1
-----CTGAGTATGATAGAAGTC----- loop 18 2
-----CTCTGAGTATGATAGAAG----- loop 18 1
-----TCAGTGCACACTACAGAACTTTGT----- mirR 22 41053
-----TCAGTGCACACTACAGAACTTTGTCT----- mirR 23 17405
-----TCAGTGCACACTACAGAACTTTGTCT----- mirR 24 4232
-----TCAGTGCACACTACAGAACTTTG----- mirR 21 1890
-----CAGTGCACACTACAGAACTTTGT----- mirR 21 830
-----CAGTGCACACTACAGAACTTTGTCT----- mirR 22 340
-----TCAGTGCACACTACAGAACTTT----- mirR 20 244
-----TCAGTGCACACTACAGAACTTTGTCTC----- mirR 25 196
-----TCAGTGCACACTACAGAACTTT----- mirR 19 114
-----CAGTGCACACTACAGAACTTTG----- mirR 20 77
-----CAGTGCACACTACAGAACTTTGTCT----- mirR 23 53
-----GTGCACTACAGAACTTTGT----- mirR 19 15
-----GTCAGTGCACACTACAGAACTTTGT----- mirR 23 13
-----CAGTGCACACTACAGAACTTTGTCTC----- mirR 24 11
-----GTGCACTACAGAACTTTGTCT----- mirR 20 10
-----CAGTGCACACTACAGAACTTT----- mirR 19 6
-----AGTGCACACTACAGAACTTTGT----- mirR 20 6
-----CAGTGCACACTACAGAACTTT----- mirR 18 4
-----GTGCACTACAGAACTTTG----- mirR 18 3
-----AGTCAGTGCACACTACAGAACTTTGT----- mirR 24 3
-----GTCAGTGCACACTACAGAACTTTG----- mirR 22 3
-----AGTGCACACTACAGAACTTT----- mirR 18 2
-----AGTGCACACTACAGAACTTTGTCT----- mirR 21 1
-----CTCTAGAGGCTGTGGTCGCCCGCTCCCCGCAA----- morR 32 1
-----CTAGAGGCTGTGGTCGCCCGCTCCCCGCAAG----- morR 31 1
-----TCTCTAGAGGCTGTGGTC----- morR 18 1
-----TAGAGGCTGTGGTCGCCG----- morR 18 1

>mmu-mir-196a-1
GAGCCGGGACTGTTGAGTGAAGTAGGTAGTTTCATGTTGTTGGGCTGGCTTTCTGAACACAACGACATCAAACCACCTGATTCATGGCAGTTACTGCTTCTTGCTTAGCTGGGGG species len reads
GAGCCGGGACTGTTGAGTGAAG----- morL 22 29
-----GGGACTGTTGAGTGAAGT----- morL 18 1
GAGCCGGGACTGTTGAGTGAAGT----- morL 23 1
-AGCCGGGACTGTTGAGTG----- morL 18 1
-----CGGGACTGTTGAGTGAAG----- morL 18 1
-----TAGGTAGTTTCATGTTGTTGGG----- mirL 22 46522
```

```

-----TAGGTAGTTTCATGTTGTTGG----- mirL 21 7295
-----TAGGTAGTTTCATGTTGTTGGC----- mirL 23 4410
-----AGGTAGTTTCATGTTGTTGGG----- mirL 21 1404
-----TAGGTAGTTTCATGTTGTTG----- mirL 20 666
-----TAGGTAGTTTCATGTTGTTGGGCC----- mirL 24 626
-----TAGGTAGTTTCATGTTGTTGGGCCT----- mirL 25 455
-----TAGGTAGTTTCATGTTGTT----- mirL 19 330
-----AGGTAGTTTCATGTTGTTGG----- mirL 20 269
-----AGGTAGTTTCATGTTGTTGGGC----- mirL 22 202
-----AGTAGGTAGTTTCATGTTGTTG----- mirL 22 68
-----GGTAGTTTCATGTTGTTGGG----- mirL 20 55
-----AGGTAGTTTCATGTTGTTGGGCC----- mirL 23 55
-----GTAGTTTCATGTTGTTGG----- mirL 18 32
-----AGGTAGTTTCATGTTGTTGGGCCT----- mirL 24 29
-----AGTAGGTAGTTTCATGTTGTTGG----- mirL 23 26
-----GTAGTTTCATGTTGTTGGG----- mirL 19 25
-----AGGTAGTTTCATGTTGTTGTT----- mirL 18 25
-----GGTAGTTTCATGTTGTTGG----- mirL 19 22
-----AGTAGGTAGTTTCATGTTGTT----- mirL 21 19
-----GTAGGTAGTTTCATGTTGTTGGG----- mirL 23 12
-----AGTAGGTAGTTTCATGTTGTTGGG----- mirL 24 12
-----AGGTAGTTTCATGTTGTTG----- mirL 19 11
-----AGTAGGTAGTTTCATGTTGTT----- mirL 20 4
-----GTAGGTAGTTTCATGTTG----- mirL 18 1
-----GGTAGTTTCATGTTGTTGGGC----- mirL 21 1
-----GGTAGTTTCATGTTGTTGGGCCTG----- mirL 24 1
-----GGTAGTTTCATGTTGTTG----- mirL 18 1
-----CCTGGCTTTCTGAACACA----- loop 18 3
-----GGGCCTGGCTTTCTGAACA----- loop 19 2
-----GGCCTGGCTTTCTGAACAC----- loop 19 1
-----ACAACGACATCAAACCACCTGA----- mirR 22 3130
-----CAACGACATCAAACCACCTGA----- mirR 21 781
-----CAACGACATCAAACCACCTGAT----- mirR 22 237
-----ACAACGACATCAAACCACCTGAT----- mirR 23 174
-----ACAACGACATCAAACCACCTG----- mirR 21 170
-----ACAACGACATCAAACCACCT----- mirR 20 91
-----CAACGACATCAAACCACCTGATT----- mirR 23 22
-----ACACAACGACATCAAACCACCT----- mirR 22 19
-----CAACGACATCAAACCACCTG----- mirR 20 16
-----ACAACGACATCAAACCACCTGATT----- mirR 24 7
-----CAACGACATCAAACCACCT----- mirR 19 6
-----ACAACGACATCAAACCAC----- mirR 18 4
-----ACAACGACATCAAACCACC----- mirR 19 4
-----CACAACGACATCAAACCACCT----- mirR 21 2
-----CACAACGACATCAAACCACCTGA----- mirR 23 2
-----AACACAACGACATCAAAC----- mirR 18 2

```

```

-----CAACGACATCAAACCACC----- mirR 18 1
-----ACACAACGACATCAAACCACCTGA----- mirR 24 1
-----CAACGACATCAAACCACCTGATTCA----- mirR 25 1
-----ATTCATGGCAGTTACTGCTTC----- morR 21 6
-----ATGGCAGTTACTGCTTCTT----- morR 19 2
-----GATTCATGGCAGTTACTG----- morR 18 2
-----ATTCATGGCAGTTACTGCT----- morR 19 1
-----TCATGGCAGTTACTGCTTCTTGCTTAGC----- morR 28 1
-----TCATGGCAGTTACTGCTTCTTGCTTAGCTGGGGG morR 34 1
-----TCATGGCAGTTACTGCTTCTTG----- morR 22 1
-----ATGGCAGTTACTGCTTCT----- morR 18 1
-----GATTCATGGCAGTTACTGCTTC----- morR 22 1

```

>mmu-mir-152

```

CGCCGCTGTTCCCCGGGCCTAGGTTCTGTGATACTCCGACTCGGGCTCTGGAGCAGTCAGTGCATGACAGAACTTGGGCCCGGTAGGACCTTCTGCA species len reads
CGCCGCTGTTCCCCGGGCC----- morL 19 3
-GCCGCTGTTCCCCGGGCC----- morL 18 3
--CCGCTGTTCCCCGGGCCT----- morL 18 1
----CTGTTCCCCGGGCCTAGG----- morL 18 1
-----AGGTTCTGTGATACTCCGACT----- mirL 23 2763
-----TAGGTTCTGTGATACTCCGACT----- mirL 24 2151
-----AGGTTCTGTGATACTCCGACTC----- mirL 24 857
-----AGGTTCTGTGATACTCCGACTCG----- mirL 25 278
-----TAGGTTCTGTGATACTCCGACTC----- mirL 25 213
-----AGGTTCTGTGATACTCCGA----- mirL 21 146
-----AGGTTCTGTGATACTCCGAC----- mirL 22 141
-----TAGGTTCTGTGATACTCCGA----- mirL 22 127
-----TAGGTTCTGTGATACTCCGAC----- mirL 23 61
-----TAGGTTCTGTGATACTCCGACTCG----- mirL 26 20
-----AGGTTCTGTGATACTCCGACTCGGG----- mirL 27 14
-----AGGTTCTGTGATACTCCGACTCGG----- mirL 26 14
-----TAGGTTCTGTGATACTC----- mirL 19 9
-----TAGGTTCTGTGATACTCCG----- mirL 21 7
-----GGTTCTGTGATACTCCGACT----- mirL 22 3
-----GTTCTGTGATACTCCGAC----- mirL 20 1
-----GTTCTGTGATACTCCGACT----- mirL 21 1
-----CCTAGGTTCTGTGATACTC----- mirL 19 1
-----TCGGGCTCTGGAGCAGTC----- loop 18 1
-----TCAGTGCATGACAGAACTTGG----- mirR 21 30664
-----TCAGTGCATGACAGAACTTGGG----- mirR 22 19294
-----TCAGTGCATGACAGAACTTGGGC----- mirR 23 5165
-----TCAGTGCATGACAGAACTTGGGCC----- mirR 24 1001
-----CAGTGCATGACAGAACTTGG----- mirR 20 827
-----CAGTGCATGACAGAACTTGGG----- mirR 21 577
-----TCAGTGCATGACAGAACTTGGGCC----- mirR 25 417
-----TCAGTGCATGACAGAACTTG----- mirR 20 337

```

```

-----TCAGTGCATGACAGAACTT----- mirR 19 336
-----GTCAGTGCATGACAGAACTTGG----- mirR 22 176
-----CAGTGCATGACAGAACTTGGGC----- mirR 22 107
-----CAGTGCATGACAGAACTTGGGCC----- mirR 23 41
-----CAGTGCATGACAGAACTTG----- mirR 19 32
-----CAGTGCATGACAGAACTTGGGCC----- mirR 24 29
-----GTCAGTGCATGACAGAACTTGGG----- mirR 23 18
-----AGTGCATGACAGAACTTGGG----- mirR 20 17
-----CAGTGCATGACAGAACTT----- mirR 18 16
-----AGTGCATGACAGAACTTGGGC----- mirR 21 10
-----GTGCATGACAGAACTTGGG----- mirR 19 8
-----GTCAGTGCATGACAGAACTTGGGC----- mirR 24 2
-----GTGCATGACAGAACTTGG----- mirR 18 2
-----AGTGCATGACAGAACTTG----- mirR 18 2
-----GTCAGTGCATGACAGAACTTG----- mirR 21 2
-----CAGTCAGTGCATGACAGAAC----- mirR 20 1
-----GTCAGTGCATGACAGAACTT----- mirR 20 1
-----GTCAGTGCATGACAGAACTTGGGCC----- mirR 25 1
-----GTCAGTGCATGACAGAAC----- mirR 18 1
-----AGTGCATGACAGAACTTGG----- mirR 19 1
-----CAGTCAGTGCATGACAGAACT----- mirR 21 1
-----GCCCCGTAGGACCTTCTG----- morR 18 74
-----TGGGCCCGGTAGGACCTTC----- morR 19 3
-----GGGCCCGGTAGGACCTTCT----- morR 19 1
-----CCGGTAGGACCTTCTGCA morR 18 1

```

>mmu-mir-411

```

CGGCGTCTCTGTGTGGTACTTGGAGAGATAGTAGACCGTATAGCGTACGCTTTATCTGTGACGTATGTAACACGGTCCACTAACCCCTCAGTATCAAATCCATCCCCGAGGCC species len reads
-----CTCTGTGTGGTACTTGGAGAGA----- morL 22 14
-----CTGTGTGGTACTTGGAGAGA----- morL 20 14
-----CTGTGTGGTACTTGGAGAGAT----- morL 21 9
-----CTCTGTGTGGTACTTGGAGAGAT----- morL 23 6
-----TCTGTGTGGTACTTGGAGAGAT----- morL 22 4
-----TGGTACTTGGAGAGATAG----- morL 18 2
-----TCTGTGTGGTACTTGGAGAGATA----- morL 23 1
CGGCGTCTCTGTGTGGTACTTGGAGAGAT----- morL 29 1
-----GTGTGGTACTTGGAGAGA----- morL 18 1
-----TAGTAGACCGTATAGCGTACGC----- mirL 22 9507
-----ATAGTAGACCGTATAGCGTACGC----- mirL 23 4501
-----TAGTAGACCGTATAGCGTACG----- mirL 21 3548
-----TAGTAGACCGTATAGCGTAC----- mirL 20 2443
-----ATAGTAGACCGTATAGCGTACG----- mirL 22 2308
-----AGTAGACCGTATAGCGTACGCT----- mirL 22 2237
-----AGTAGACCGTATAGCGTACGC----- mirL 21 1893
-----ATAGTAGACCGTATAGCGTAC----- mirL 21 1574
-----TAGTAGACCGTATAGCGTA----- mirL 19 823

```

```

-----AGTAGACCGTATAGCGTACG----- mirL 20 713
-----ATAGTAGACCGTATAGCGTA----- mirL 20 389
-----AGTAGACCGTATAGCGTAC----- mirL 19 324
-----TAGTAGACCGTATAGCGTACGCT----- mirL 23 305
-----AGTAGACCGTATAGCGTACGCTT----- mirL 23 239
-----TAGTAGACCGTATAGCGT----- mirL 18 163
-----ATAGTAGACCGTATAGCGT----- mirL 19 134
-----ATAGTAGACCGTATAGCGTACGCT----- mirL 24 98
-----AGTAGACCGTATAGCGTA----- mirL 18 95
-----TAGTAGACCGTATAGCGTACGCTT----- mirL 24 49
-----AGTAGACCGTATAGCGTACGCTTT----- mirL 24 35
-----ATAGTAGACCGTATAGCG----- mirL 18 33
-----GATAGTAGACCGTATAGCGTACGC----- mirL 24 10
-----GTAGACCGTATAGCGTACGC----- mirL 20 4
-----GTAGACCGTATAGCGTACG----- mirL 19 2
-----GTAGACCGTATAGCGTAC----- mirL 18 2
-----GATAGTAGACCGTATAGCGTACG----- mirL 23 1
-----TAGACCGTATAGCGTACGC----- mirL 19 1
-----GATAGTAGACCGTATAGCGTAC----- mirL 22 1
-----GTAGACCGTATAGCGTACGCT----- mirL 21 1
-----CGCTTTATCTGTGACGTA----- loop 18 1
-----GCTTTATCTGTGACGTAT----- loop 18 1
-----TATGTAACACGGTCCACTAAC----- mirR 21 10017
-----TATGTAACACGGTCCACTAA----- mirR 20 7523
-----TATGTAACACGGTCCACTAACC----- mirR 22 6343
-----TATGTAACACGGTCCACTA----- mirR 19 2801
-----CGTATGTAACACGGTCCACTAA----- mirR 22 1815
-----TATGTAACACGGTCCACTAACC----- mirR 23 781
-----ATGTAACACGGTCCACTAAC----- mirR 20 738
-----ATGTAACACGGTCCACTAA----- mirR 19 721
-----CGTATGTAACACGGTCCACTA----- mirR 21 541
-----TATGTAACACGGTCCACT----- mirR 18 495
-----ATGTAACACGGTCCACTA----- mirR 18 344
-----CGTATGTAACACGGTCCACTAAC----- mirR 23 287
-----ATGTAACACGGTCCACTAACC----- mirR 21 231
-----CGTATGTAACACGGTCCACT----- mirR 20 150
-----TATGTAACACGGTCCACTAACCCCT----- mirR 24 139
-----GTATGTAACACGGTCCACTAAC----- mirR 22 54
-----ATGTAACACGGTCCACTAACC----- mirR 22 54
-----GTATGTAACACGGTCCACTAA----- mirR 21 46
-----CGTATGTAACACGGTCCACTAAC----- mirR 24 24
-----CGTATGTAACACGGTCCA----- mirR 18 17
-----ACGTATGTAACACGGTCCACTAAC----- mirR 24 11
-----GTATGTAACACGGTCCACTAAC----- mirR 23 9
-----ATGTAACACGGTCCACTAACCCCT----- mirR 23 9
-----GTATGTAACACGGTCCACTA----- mirR 20 7

```

```

-----CGTATGTAACACGGTCCAC----- mirR 19 7
-----ACGTATGTAACACGGTCCACTAA----- mirR 23 7
-----TGTAACACGGTCCACTAAC----- mirR 19 5
-----TGTAACACGGTCCACTAACC----- mirR 20 4
-----GTAACACGGTCCACTAACC----- mirR 19 4
-----TGTAACACGGTCCACTAA----- mirR 18 3
-----ATGTAACACGGTCCACTAACCCCTC----- mirR 24 3
-----ACGTATGTAACACGGTCCACT----- mirR 21 1
-----GTATGTAACACGGTCCAC----- mirR 18 1
-----GTAACACGGTCCACTAAC----- mirR 18 1
-----GTAACACGGTCCACTAACC----- mirR 20 1
-----CCTCAGTATCAAATCCATCC----- morR 20 5
-----CCCTCAGTATCAAATCCATCCCCGAGGCC morR 30 2
-----CCCTCAGTATCAAATCCATCCCCGAGGC-- morR 28 2
-----CCCTCAGTATCAAATCCATCCCC----- morR 23 1
-----CCTCAGTATCAAATCCATCCCCGA----- morR 24 1
-----ACCCTCAGTATCAAATCCATC----- morR 21 1
-----CCCTCAGTATCAAATCCATCC----- morR 21 1
-----TCAGTATCAAATCCATCC----- morR 18 1
-----CAGTATCAAATCCATCCC----- morR 18 1
-----CCCTCAGTATCAAATCCATC----- morR 20 1

```

>mmu-mir-138-2

| Species | len | reads |
|---------|-----|-------|
| morL    | 20  | 31    |
| morL    | 21  | 14    |
| morL    | 20  | 4     |
| morL    | 21  | 4     |
| morL    | 18  | 4     |
| morL    | 18  | 2     |
| morL    | 22  | 2     |
| morL    | 19  | 2     |
| morL    | 19  | 1     |
| mirL    | 23  | 35620 |
| mirL    | 24  | 10389 |
| mirL    | 26  | 4364  |
| mirL    | 21  | 4181  |
| mirL    | 25  | 3682  |
| mirL    | 22  | 2872  |
| mirL    | 20  | 435   |
| mirL    | 22  | 95    |
| mirL    | 21  | 13    |
| mirL    | 20  | 7     |
| mirL    | 24  | 7     |
| mirL    | 23  | 6     |
| mirL    | 24  | 4     |

```
-----CAGCTGGTGTGTGAATCAGGCCGA----- mirL 25 3
-----TGGTGTGTGAATCAGGCCGAC----- mirL 22 2
-----CAGCTGGTGTGTGAATCAGGCCGAC----- mirL 26 2
-----CAGCTGGTGTGTGAATCAGGCCGACG----- mirL 27 2
-----TGGTGTGTGAATCAGGC----- mirL 18 1
-----GCAGCTGGTGTGTGAATC----- mirL 19 1
-----GCTGGTGTGTGAATCAGGCC----- mirL 21 1
-----CAGCTGGTGTGTGAATCAGGC----- mirL 22 1
-----GCAGCTGGTGTGTGAATCAGGCCG----- mirL 25 1
-----GCTGGTGTGTGAATCAGGCCGACG----- mirL 25 1
-----TGGTGTGTGAATCAGGCCGA----- mirL 21 1
-----ACGAGCAGCGCATCCTCTTACCG----- loop 24 26
-----ACGAGCAGCGCATCCTCTTACCGG----- loop 25 7
-----ACGAGCAGCGCATCCTCTTACC----- loop 22 6
-----ACGAGCAGCGCATCCTCTTACCC----- loop 23 3
-----AGCAGCGCATCCTCTTAC----- loop 18 2
-----CGAGCAGCGCATCCTCTTACC----- loop 21 1
-----ACGAGCAGCGCATCCTCTTACCGGC----- loop 26 1
-----GCTATTTACGACACCAGGGTT----- mirR 22 1443
-----GCTATTTACGACACCAGGGT----- mirR 21 459
-----GCTATTTACGACACCAGGGTTG----- mirR 23 269
-----GCTATTTACGACACCAGGG----- mirR 20 62
-----GCTATTTACGACACCAG----- mirR 18 59
-----CTATTTACGACACCAGGGTT----- mirR 21 53
-----GCTATTTACGACACCAGGGTTGC----- mirR 24 18
-----CTATTTACGACACCAGGGTTG----- mirR 22 15
-----CTATTTACGACACCAGGGTTGC----- mirR 23 9
-----GCTATTTACGACACCAGGGTTGCACC----- mirR 27 9
-----CGGCTATTTACGACACCAGGG----- mirR 22 4
-----TATTTACGACACCAGGG----- mirR 18 4
-----ATTTACGACACCAGGGT----- mirR 18 4
-----GGCTATTTACGACACCAGGGT----- mirR 22 2
-----CGGCTATTTACGACACCAG----- mirR 20 1
-----CGGCTATTTACGACACCAGG----- mirR 21 1
-----TATTTACGACACCAGGGT----- mirR 19 1
-----GGCTATTTACGACACCAGGGTT----- mirR 23 1
-----CGGCTATTTACGACACCA----- mirR 19 1
-----TATTTACGACACCAGGGTTGC----- mirR 22 1
-----CCCTACCCATCCTCTCCA----- morR 18 1
-----TGCACCTACCCATCCTC----- morR 18 1
-----TTGCACCTACCCATCCT----- morR 18 1
-----ACCTACCCATCCTCTCCAGGC----- morR 22 1
```

>mmu-mir-543

```
TGCTGCTGACGTACGGTGCTTAATGAGAAGTTGCCCGGTGTTTTTCGCTTTATATGTGACGAAACATTCGCGGTGCACTTCTTTTTCAGCATCCTATTCTAC species len reads
-----CTGACGTACGGTGCTTAATGA----- morL 21 44
```



```

-----ACGTACGGTGCTTAATGAGA----- morL 20 34
-----CGTACGGTGCTTAATGAGA----- morL 19 25
----GCTGACGTACGGTGCTTAATGA----- morL 22 3
--CTGCTGACGTACGGTGCTTAATGA----- morL 24 2
-----CGTACGGTGCTTAATGAGAA----- morL 20 2
-----ACGTACGGTGCTTAATGAG----- morL 19 2
---TGCTGACGTACGGTGCTTAATGA----- morL 23 2
TGCTGCTGACGTACGGTGCTTAATGA----- morL 26 2
-----GACGTACGGTGCTTAATGAGA----- morL 21 2
-----TGACGTACGGTGCTTAATGAG----- morL 21 1
-----GACGTACGGTGCTTAATGA----- morL 19 1
-----GTACGGTGCTTAATGAGA----- morL 18 1
-----CGGTGCTTAATGAGAAAGT----- morL 18 1
-----ACGTACGGTGCTTAATGA----- morL 18 1
-----ACGTACGGTGCTTAATGAGAA----- morL 21 1
-----AGTTGCCCGCGTGTTTTTCGCT----- mirL 22 1573
-----AAGTTGCCCGCGTGTTTTTCG----- mirL 21 170
-----GAAGTTGCCCGCGTGTTTTTCG----- mirL 22 129
-----AAGTTGCCCGCGTGTTTTT----- mirL 19 126
-----AAGTTGCCCGCGTGTTTTTCGC----- mirL 22 111
-----GAAGTTGCCCGCGTGTTTTT----- mirL 20 110
-----GAAGTTGCCCGCGTGTTTTTCGC----- mirL 23 75
-----AAGTTGCCCGCGTGTTTTTCGCT----- mirL 23 73
-----AGTTGCCCGCGTGTTTTTCGCTT----- mirL 23 60
-----GAAGTTGCCCGCGTGTTTTTC----- mirL 21 60
-----AGTTGCCCGCGTGTTTTTCGC----- mirL 21 34
-----AGTTGCCCGCGTGTTTTTCGCTTT----- mirL 24 30
-----AAGTTGCCCGCGTGTTTTTC----- mirL 20 26
-----GTTGCCCGCGTGTTTTTCGC----- mirL 20 14
-----GAAGTTGCCCGCGTGTTT----- mirL 18 11
-----AGTTGCCCGCGTGTTTTT----- mirL 18 8
-----AGTTGCCCGCGTGTTTTTCG----- mirL 20 7
-----AAGTTGCCCGCGTGTTTTTCGCTTT----- mirL 25 7
-----AAGTTGCCCGCGTGTTTTTCGCTT----- mirL 24 6
-----GAAGTTGCCCGCGTGTTTTTCGCT----- mirL 24 5
-----GAAGTTGCCCGCGTGTTTTTCGCTT----- mirL 25 4
-----AGTTGCCCGCGTGTTTTTCGCTTTA----- mirL 25 4
-----AGAAGTTGCCCGCGTGT----- mirL 18 1
-----AAACATTCGCGGTGCACTTCTT----- mirR 22 31282
-----AAACATTCGCGGTGCACTTCTTT----- mirR 23 11840
-----AAACATTCGCGGTGCACTTCT----- mirR 21 6502
-----AAACATTCGCGGTGCACTTCTTTT----- mirR 24 2735
-----AAACATTCGCGGTGCACTTC----- mirR 20 2117
-----AAACATTCGCGGTGCACTT----- mirR 19 1833
-----AAACATTCGCGGTGCACTTCTTTT----- mirR 25 1109
-----AACATTCGCGGTGCACTTCTTT----- mirR 22 335

```

```

-----CGAAACATTCGCGGTGCACTTC----- mirR 22 325
-----ACATTCGCGGTGCACTTCTTT----- mirR 22 311
-----AACATTCGCGGTGCACTTCTT----- mirR 21 188
-----CGAAACATTCGCGGTGCACTTCT----- mirR 23 154
-----ACATTCGCGGTGCACTTCT----- mirR 19 117
-----AACATTCGCGGTGCACTTCT----- mirR 20 113
-----ACATTCGCGGTGCACTTCTTT----- mirR 21 91
-----AACATTCGCGGTGCACTTCTTT----- mirR 23 79
-----ACATTCGCGGTGCACTTCTTTT----- mirR 23 78
-----GAAACATTCGCGGTGCACTTCT----- mirR 22 66
-----ACATTCGCGGTGCACTTCTT----- mirR 20 49
-----GAAACATTCGCGGTGCACTTCTT----- mirR 23 38
-----CGAAACATTCGCGGTGCACTT----- mirR 21 34
-----ACATTCGCGGTGCACTTC----- mirR 18 24
-----CGAAACATTCGCGGTGCA----- mirR 18 24
-----CGAAACATTCGCGGTGCACTTCTT----- mirR 24 22
-----CATTTCGCGGTGCACTTCT----- mirR 18 21
-----AACATTCGCGGTGCACTTC----- mirR 19 21
-----CATTTCGCGGTGCACTTCTT----- mirR 19 17
-----AACATTCGCGGTGCACTTCTTTT----- mirR 24 15
-----CGAAACATTCGCGGTGCACTTCTTT----- mirR 25 14
-----ACGAAACATTCGCGGTGCACTTCTT----- mirR 25 11
-----GAAACATTCGCGGTGCACTT----- mirR 20 10
-----CATTTCGCGGTGCACTTCTTTT----- mirR 21 8
-----AACATTCGCGGTGCACTT----- mirR 18 8
-----GAAACATTCGCGGTGCACTTC----- mirR 21 7
-----CGAAACATTCGCGGTGCACT----- mirR 20 3
-----GAAACATTCGCGGTGCACTTCTTT----- mirR 24 3
-----CATTTCGCGGTGCACTTCTTTT----- mirR 22 3
-----GAAACATTCGCGGTGCACT----- mirR 19 2
-----ACGAAACATTCGCGGTGCACTTC----- mirR 23 2
-----ACATTCGCGGTGCACTTCTTTTTC----- mirR 24 2
-----ACGAAACATTCGCGGTGCACTT----- mirR 22 1
-----CATTTCGCGGTGCACTTCTTT----- mirR 20 1
-----ACGAAACATTCGCGGTGCACTTCTTT----- mirR 26 1
-----ACGAAACATTCGCGGTGCACTTCT----- mirR 24 1
-----TTTTCAGCATCCTATTCTAC morR 20 1

```

>mmu-mir-331

```

GTCTGGTTTTGTTTGGGTTTGTTCAGGTATGGTCCCAGGGATCCCAGATCAAACCAGGCCCTGGGCCTATCCTAGAACCAACCTAAACCCGTGCATCATTCTGGAACACCC species len reads
----GGTTTTGTTTGGGTTTGT----- morL 19 91
---TGGTTTTGTTTGGGTTTGT----- morL 20 37
----GTTTTGTTTGGGTTTGT----- morL 18 29
----GGTTTTGTTTGGGTTTGTTC----- morL 20 7
----GGTTTTGTTTGGGTTTGT----- morL 18 5
----GTTTTGTTTGGGTTTGTTC----- morL 19 5

```

```

-----TTTTGTTTGGGTTTGTTC----- morL 18 4
---TGGTTTGTGGTTG----- morL 18 3
---GGTTTGTGGTTTGTCTA----- morL 22 1
--CTGGTTTGTGGTTG----- morL 19 1
--CTGGTTTGTGGTTTGTTC----- morL 22 1
--CTGGTTTGTGGTTTGT----- morL 21 1
-----TTTGTGGTTTGTCT----- morL 18 1
GTCCTGGTTTGTGGTTTGT----- morL 22 1
-----CTAGGTATGGTCCCAGGGATCC----- mirL 22 267
-----CTAGGTATGGTCCCAGGGATC----- mirL 21 226
-----CTAGGTATGGTCCCAGGGATCCC----- mirL 23 116
-----TCTAGGTATGGTCCCAGGGATC----- mirL 22 57
-----CTAGGTATGGTCCCAGGGAT----- mirL 20 34
-----CTAGGTATGGTCCCAGGGATCCCA----- mirL 24 25
-----TCTAGGTATGGTCCCAGGGAT----- mirL 21 20
-----TCTAGGTATGGTCCCAGGGATCC----- mirL 23 19
-----CTAGGTATGGTCCCAGGGATCCCAGA----- mirL 26 18
-----TCTAGGTATGGTCCCAGGGATCCCA----- mirL 25 9
-----TCTAGGTATGGTCCCAGGGATCCC----- mirL 24 6
-----CTAGGTATGGTCCCAGGGA----- mirL 19 6
-----TTCTAGGTATGGTCCCAGGGA----- mirL 21 4
-----GGTATGGTCCCAGGGATCC----- mirL 19 3
-----TCTAGGTATGGTCCCAGGGA----- mirL 20 3
-----AGGTATGGTCCCAGGGATCC----- mirL 20 2
-----GGTATGGTCCCAGGGATC----- mirL 18 2
-----TAGGTATGGTCCCAGGGATCCC----- mirL 22 2
-----TAGGTATGGTCCCAGGGATCC----- mirL 21 2
-----TAGGTATGGTCCCAGGGATCCCAGA----- mirL 25 2
-----AGGTATGGTCCCAGGGATC----- mirL 19 2
-----TAGGTATGGTCCCAGGGAT----- mirL 19 1
-----TCTAGGTATGGTCCCAGGGATCCCAGA----- mirL 27 1
-----TCCCAGATCAAACCAGGC----- loop 18 3
-----GCCCTGGGCCTATCCTAGA----- mirR 20 29693
-----GCCCTGGGCCTATCCTAGAA----- mirR 21 16244
-----GCCCTGGGCCTATCCTAGAAC----- mirR 22 9437
-----GCCCTGGGCCTATCCTAGAACC----- mirR 23 1770
-----CCCCTGGGCCTATCCTAGAACC----- mirR 22 1001
-----CCCCTGGGCCTATCCTAGAAC----- mirR 21 971
-----GCCCTGGGCCTATCCTAG----- mirR 19 664
-----CCCCTGGGCCTATCCTAGA----- mirR 19 428
-----CCCCTGGGCCTATCCTAGAA----- mirR 20 354
-----GCCCTGGGCCTATCCTA----- mirR 18 305
-----GCCCTGGGCCTATCCTAGAACCA----- mirR 24 170
-----CCCCTGGGCCTATCCTAGAACCA----- mirR 23 160
-----CCCCTGGGCCTATCCTAG----- mirR 18 51
-----CCCCTGGGCCTATCCTAGAACCA----- mirR 24 21

```

```

-----CCCTGGGCCTATCCTAGA----- mirR 18 9
-----GGCCCTGGGCCTATCCTAGA----- mirR 21 3
-----CCTGGGCCTATCCTAGAA----- mirR 18 3
-----GGCCCTGGGCCTATCCTAGAA----- mirR 22 1
-----CCAACCTAAACCCGTGCATC----- morR 20 21
-----CCAACCTAAACCCGTGCATCATTCTGGAAC----- morR 31 16
-----CCAACCTAAACCCGTGCATCATTCTGGAA----- morR 29 15
-----CCAACCTAAACCCGTGCATCA----- morR 21 9
-----CCAACCTAAACCCGTGCATCATTCTGGAA----- morR 30 8
-----CCAACCTAAACCCGTGCATCATTCTGGAACACCC morR 35 6
-----CCAACCTAAACCCGTGCATCATTCTGGAAACA--- morR 32 5
-----ACCAACCTAAACCCGTGC----- morR 18 1
-----CAACCTAAACCCGTGCAT----- morR 18 1

>mmu-mir-200a
AGAGCATACCTGGGCCTCTGTGGGCATCTTACCGGACAGTGCTGGATTCTTGGCTTGACTCTAACACTGTCTGGTAACGATGTTCAAAGGTGACCCACCATTGCGCGA species len reads
-----TACCTGGGCCTCTGTGGGC----- morL 19 2
-----ATACCTGGGCCTCTGTGGGCA----- morL 21 1
-----ATACCTGGGCCTCTGTGG----- morL 18 1
-----ATACCTGGGCCTCTGTGGG----- morL 19 1
-----CATACCTGGGCCTCTGTGGGC----- morL 21 1
-----CATACCTGGGCCTCTGTGGG----- morL 20 1
-----TACCTGGGCCTCTGTGGG----- morL 18 1
-----CCTGGGCCTCTGTGGGCAT----- morL 19 1
AGAGCATACCTGGGCCTCTGT----- morL 21 1
-----ACCTGGGCCTCTGTGGGC----- morL 18 1
-----CATCTTACCGGACAGTGCTGG----- mirL 21 773
-----CATCTTACCGGACAGTGCTGGA----- mirL 22 464
-----CATCTTACCGGACAGTGCTG----- mirL 20 307
-----CATCTTACCGGACAGTGCTGGAT----- mirL 23 214
-----CATCTTACCGGACAGTGCT----- mirL 19 120
-----CATCTTACCGGACAGTGCTGGATT----- mirL 24 71
-----CATCTTACCGGACAGTGCT----- mirL 18 36
-----ATCTTACCGGACAGTGCT----- mirL 18 8
-----ATCTTACCGGACAGTGCTG----- mirL 19 8
-----CTTACCGGACAGTGCTGG----- mirL 18 3
-----TCTTACCGGACAGTGCTG----- mirL 18 3
-----ATCTTACCGGACAGTGCTGGA----- mirL 21 3
-----ATCTTACCGGACAGTGCTGG----- mirL 20 2
-----ATCTTACCGGACAGTGCTGGAT----- mirL 22 1
-----GCATCTTACCGGACAGTGCTG----- mirL 21 1
-----TGGATTCTTGGCTTGAC----- loop 18 2
-----ATTTCTTGGCTTGACTCT----- loop 18 1
-----TAACACTGTCTGGTAACGATGTT----- mirR 23 41557
-----TAACACTGTCTGGTAACGATGT----- mirR 22 10411
-----AACACTGTCTGGTAACGATGTT----- mirR 22 3114

```

```

-----TAACACTGTCTGGTAACGATGTTTC----- mirR 24 2629
-----TAACACTGTCTGGTAACGATG----- mirR 21 841
-----AACACTGTCTGGTAACGATGT----- mirR 21 558
-----TAACACTGTCTGGTAACGATGTTCA----- mirR 25 417
-----AACACTGTCTGGTAACGATGTTTC----- mirR 23 279
-----TAACACTGTCTGGTAACGAT----- mirR 20 128
-----AACACTGTCTGGTAACGATG----- mirR 20 72
-----TAACACTGTCTGGTAACGA----- mirR 19 62
-----AACACTGTCTGGTAACGATGTTCA----- mirR 24 51
-----ACACTGTCTGGTAACGATGT----- mirR 20 22
-----ACACTGTCTGGTAACGATGTT----- mirR 21 14
-----CTAACACTGTCTGGTAACGATGTT----- mirR 24 14
-----CACTGTCTGGTAACGATGT----- mirR 19 13
-----AACACTGTCTGGTAACGAT----- mirR 19 12
-----TCTAACACTGTCTGGTAACGATGT----- mirR 24 11
-----CTCTAACACTGTCTGGTAACGATGTT----- mirR 26 9
-----AACACTGTCTGGTAACGATGTTCAA----- mirR 25 9
-----ACACTGTCTGGTAACGATGTTCA----- mirR 23 8
-----CTCTAACACTGTCTGGTAACGA----- mirR 22 8
-----CACTGTCTGGTAACGATGTT----- mirR 20 4
-----CTAACACTGTCTGGTAAC----- mirR 18 3
-----TCTAACACTGTCTGGTAACGATGTT----- mirR 25 2
-----ACACTGTCTGGTAACGAT----- mirR 18 2
-----CTAACACTGTCTGGTAACGATGT----- mirR 23 1
-----ACACTGTCTGGTAACGATGTTCAA----- mirR 24 1
-----ACACTGTCTGGTAACGATGTTTC----- mirR 22 1
-----TTCAAAGGTGACCCACCA----- morR 18 4
-----TCAAAGGTGACCCACCAT----- morR 18 4
-----CAAAGGTGACCCACCATTTCG----- morR 20 3
-----CAAAGGTGACCCACCATT----- morR 18 2
-----CAAAGGTGACCCACCATTTCGCCGA morR 24 1
-----CAAAGGTGACCCACCATTTCGCCG- morR 23 1
-----CAAAGGTGACCCACCATTTC----- morR 19 1

```

>mmu-mir-15a

```

CAAACCAACCCTTGGAGTAAAGTAGCAGCACATAATGGTTTGTGGATGTTGAAAAGGTGCAGGCCATACTGTGCTGCCTCAAATACAAGGACCTGATCTTCTGAAGAGAGTACC species len reads
---AACCAACCCTTGGAGTAAAG----- morL 20 5
CAAACCAACCCTTGGAGTAAA----- morL 22 4
---ACCAACCCTTGGAGTAAAG----- morL 19 3
CAAACCAACCCTTGGAGTAAAG----- morL 23 2
---AAACCAACCCTTGGAGTA----- morL 18 2
---AAAACCAACCCTTGGAGTAAAG----- morL 22 1
---AACCAACCCTTGGAGTAAA----- morL 19 1
---AACCAACCCTTGGAGTAA----- morL 18 1
---AAACCAACCCTTGGAGTAAAG----- morL 21 1
---ACCAACCCTTGGAGTAAAGT----- morL 20 1

```

```

-----CAACCCTTGGAGTAAAGT----- morL 18 1
CAAAACCAACCCTTGGAGTA----- morL 20 1
-AAAACCAACCCTTGGAGTA----- morL 19 1
----ACCAACCCTTGGAGTAAA----- morL 18 1
-----TAGCAGCACATAATGGTTTGT----- mirL 21 21351
-----TAGCAGCACATAATGGTTTGTGGA----- mirL 24 15463
-----TAGCAGCACATAATGGTTTGTGG----- mirL 23 8683
-----TAGCAGCACATAATGGTTTGTG----- mirL 22 3885
-----TAGCAGCACATAATGGTTTG----- mirL 20 1778
-----AGCAGCACATAATGGTTTGT----- mirL 20 1001
-----TAGCAGCACATAATGGTTTGTGGAT----- mirL 25 803
-----AGCAGCACATAATGGTTTGTGGA----- mirL 23 441
-----AGCAGCACATAATGGTTTGTGG----- mirL 22 343
-----TAGCAGCACATAATGGTTT----- mirL 19 264
-----AGCAGCACATAATGGTTTGTG----- mirL 21 172
-----AGCAGCACATAATGGTTTGT----- mirL 19 128
-----GTAGCAGCACATAATGGTTTGT----- mirL 22 125
-----AGCAGCACATAATGGTTTGTGGAT----- mirL 24 84
-----AGCAGCACATAATGGTTT----- mirL 18 18
-----GCAGCACATAATGGTTTGT----- mirL 19 13
-----GTAGCAGCACATAATGGTTTG----- mirL 21 8
-----GTAGCAGCACATAATGGTTTGTGGA----- mirL 25 6
-----GTAGCAGCACATAATGGTTTGTG----- mirL 23 5
-----GCAGCACATAATGGTTTGTGG----- mirL 21 4
-----GCAGCACATAATGGTTTGTGGA----- mirL 22 3
-----CAGCACATAATGGTTTGT----- mirL 18 3
-----GTAGCAGCACATAATGGTTTGTGG----- mirL 24 2
-----AGTAGCAGCACATAATGGTTTGT----- mirL 22 1
-----GCAGCACATAATGGTTTGTG----- mirL 20 1
-----GCAGCACATAATGGTTTG----- mirL 18 1
-----GTAGCAGCACATAATGGT----- mirL 18 1
-----GGATGTTGAAAAGGTGCA----- loop 18 4
-----GATGTTGAAAAGGTGCAG----- loop 18 1
-----TGTGGATGTTGAAAAGGT----- loop 18 1
-----CAGGCCATACTGTGCTGCCTCA----- mirR 22 4281
-----CAGGCCATACTGTGCTGCCTC----- mirR 21 921
-----CAGGCCATACTGTGCTGCCTCAA----- mirR 23 515
-----CAGGCCATACTGTGCTGCCT----- mirR 20 407
-----CAGGCCATACTGTGCTGCCTCAAA----- mirR 24 334
-----AGGCCATACTGTGCTGCCTCA----- mirR 21 133
-----AGGCCATACTGTGCTGCCTCAA----- mirR 22 62
-----CAGGCCATACTGTGCTGCCTCAAAA----- mirR 25 40
-----GCAGGCCATACTGTGCTGCCTCA----- mirR 23 31
-----CAGGCCATACTGTGCTGCCT----- mirR 19 19
-----GCAGGCCATACTGTGCTGCCT----- mirR 21 14
-----GGCCATACTGTGCTGCCTCA----- mirR 20 10

```

```

-----AGGCCATACTGTGCTGCCT----- mirR 19 5
-----AGGCCATACTGTGCTGCCTC----- mirR 20 3
-----GCAGGCCATACTGTGCTGCCTC----- mirR 22 3
-----AGGCCATACTGTGCTGCCTCAA----- mirR 23 2
-----GCAGGCCATACTGTGCTGCCTCAA----- mirR 24 2
-----GCCATACTGTGCTGCCTCA----- mirR 19 2
-----TGCAGGCCATACTGTGCT----- mirR 18 1
-----AGGCCATACTGTGCTGCCTCAA----- mirR 24 1
-----TGCAGGCCATACTGTGCTGCCTCA----- mirR 24 1
-----GCAGGCCATACTGTGCTGC----- mirR 19 1
-----TGCAGGCCATACTGTGCTGCCT----- mirR 22 1
-----GCCATACTGTGCTGCCTC----- mirR 18 1
-----GTGCAGGCCATACTGTGC----- mirR 18 1
-----GGCCATACTGTGCTGCCTC----- mirR 19 1
-----TCAAATACAAGGACCTG----- morR 18 2
-----AAATACAAGGACCTGATCTTC----- morR 21 1
-----AAATACAAGGACCTGATCTTCTGAAGAGAGTACC morR 34 1
-----ATACAAGGACCTGATCTTC----- morR 19 1
-----AAAATACAAGGACCTGAT----- morR 18 1

```

>mmu-mir-196a-2

| TTGCTCAGCTGATCTGTGGCTTAGGTAGTTTCATGTTGTTGGGATTGAGTTTTGAACTCGGCAACAAGAACTGCCTGAGTTACATCAGTCGGTTTTTCGTC | species | len | reads |
|-------------------------------------------------------------------------------------------------------|---------|-----|-------|
| TTGCTCAGCTGATCTGTGGCT-----                                                                            | morL    | 21  | 9     |
| TTGCTCAGCTGATCTGTGGCTTT-----                                                                          | morL    | 22  | 2     |
| --GCTCAGCTGATCTGTGGC-----                                                                             | morL    | 18  | 1     |
| -TGCTCAGCTGATCTGTGGCT-----                                                                            | morL    | 20  | 1     |
| ---CTCAGCTGATCTGTGGCTTA-----                                                                          | morL    | 20  | 1     |
| -----TAGGTAGTTTCATGTTGTTGGG-----                                                                      | mirL    | 22  | 46522 |
| -----TAGGTAGTTTCATGTTGTTGG-----                                                                       | mirL    | 21  | 7295  |
| -----TAGGTAGTTTCATGTTGTTGGGA-----                                                                     | mirL    | 23  | 1972  |
| -----AGGTAGTTTCATGTTGTTGGG-----                                                                       | mirL    | 21  | 1404  |
| -----TAGGTAGTTTCATGTTGTTG-----                                                                        | mirL    | 20  | 666   |
| -----TAGGTAGTTTCATGTTGTTGGGATT-----                                                                   | mirL    | 25  | 600   |
| -----TAGGTAGTTTCATGTTGTTGGGAT-----                                                                    | mirL    | 24  | 485   |
| -----TAGGTAGTTTCATGTTGTT-----                                                                         | mirL    | 19  | 330   |
| -----AGGTAGTTTCATGTTGTTGG-----                                                                        | mirL    | 20  | 269   |
| -----GGTAGTTTCATGTTGTTGGG-----                                                                        | mirL    | 20  | 55    |
| -----AGGTAGTTTCATGTTGTTGGGA-----                                                                      | mirL    | 22  | 47    |
| -----AGGTAGTTTCATGTTGTTGGGATT-----                                                                    | mirL    | 24  | 38    |
| -----GTAGTTTCATGTTGTTGG-----                                                                          | mirL    | 18  | 32    |
| -----GTAGTTTCATGTTGTTGGG-----                                                                         | mirL    | 19  | 25    |
| -----AGGTAGTTTCATGTTGTT-----                                                                          | mirL    | 18  | 25    |
| -----GGTAGTTTCATGTTGTTGG-----                                                                         | mirL    | 19  | 22    |
| -----AGGTAGTTTCATGTTGTTGGGAT-----                                                                     | mirL    | 23  | 20    |
| -----TTAGGTAGTTTCATGTTGTTGGG-----                                                                     | mirL    | 23  | 14    |
| -----AGGTAGTTTCATGTTGTTG-----                                                                         | mirL    | 19  | 11    |

```

-----GGTAGTTTCATGTTGTTGGGAT----- mirL 22 3
-----CTTAGGTAGTTTCATGTTGTTG----- mirL 22 3
-----TTAGGTAGTTTCATGTTGTTGGGA----- mirL 24 3
-----TTAGGTAGTTTCATGTTGTTGG----- mirL 22 1
-----GGTAGTTTCATGTTGTTG----- mirL 18 1
-----CTTAGGTAGTTTCATGTT----- mirL 18 1
-----TTAGGTAGTTTCATGTTGTT----- mirL 20 1
-----GGATTGAGTTTTGAACTCG----- loop 19 1
-----GATTGAGTTTTGAACTCG----- loop 18 1
-----CGGCAACAAGAAACTGCCTGAG----- mirR 22 292
-----TCGGCAACAAGAAACTGCCTGA----- mirR 22 238
-----GCAACAAGAAACTGCCTGAG----- mirR 20 18
-----CAACAAGAAACTGCCTGA----- mirR 18 16
-----GGCAACAAGAAACTGCCTGAG----- mirR 21 13
-----CGGCAACAAGAAACTGCC----- mirR 18 12
-----TCGGCAACAAGAAACTGC----- mirR 18 9
-----CTCGGCAACAAGAAACTG----- mirR 18 6
-----TCGGCAACAAGAAACTGCCTGAG----- mirR 23 6
-----TCGGCAACAAGAAACTGCCTGAGT----- mirR 24 4
-----CGGCAACAAGAAACTGCCTGA----- mirR 21 4
-----GCAACAAGAAACTGCCTGA----- mirR 19 4
-----CAACAAGAAACTGCCTGAG----- mirR 19 4
-----GGCAACAAGAAACTGCCTGA----- mirR 20 3
-----GCAACAAGAAACTGCCTG----- mirR 18 3
-----TCGGCAACAAGAAACTGCCTG----- mirR 21 1
-----CGGCAACAAGAAACTGCCT----- mirR 19 1
-----ACTCGGCAACAAGAAACTGCCT----- mirR 22 1
-----ACATCAGTCGGTTTTTCGTC morR 19 2
-----ACATCAGTCGGTTTTTCGT- morR 18 1

```

>mmu-mir-136

```

AACGGTGTGGATGAGCCCTCGGAGGACTCCATTTGTTTTGATGATGGATTCTTAAGCTCCATCATCGTCTCAAATGAGTCTTCAGAGGGTTCTATCATGTGCGTC species len reads
----GTGTTGGATGAGCCCTCGGA----- morL 20 66
----GTGTTGGATGAGCCCTCGGAG----- morL 22 18
----TGGATGAGCCCTCGGAGGA----- morL 19 14
-ACGGTGTGGATGAGCCCTCGGA----- morL 23 10
----TGTGGATGAGCCCTCGGA----- morL 19 7
---GGTGTGGATGAGCCCTCGGA----- morL 21 6
----TGTGGATGAGCCCTCGGAG----- morL 20 6
----TTGGATGAGCCCTCGGAG----- morL 19 5
----GTTGGATGAGCCCTCGGA----- morL 18 5
---GTGTTGGATGAGCCCTCGGAG----- morL 21 4
----TGGATGAGCCCTCGGAGGAC----- morL 20 4
----TGGATGAGCCCTCGGAG----- morL 18 3
---CGGTGTGGATGAGCCCTCGGAG----- morL 24 2
---CGGTGTGGATGAGCCCTCGGAG----- morL 23 2

```



```

-----TTGGATGAGCCCTCGGAG----- morL 18 1
-----GTTGGATGAGCCCTCGGAGGA----- morL 21 1
-----GGATGAGCCCTCGGAGGA----- morL 18 1
----GTGTTGGATGAGCCCTCGG----- morL 19 1
----GTTGGATGAGCCCTCGGAGG----- morL 20 1
AACGGTGTGGATGAGCCCTCGGAGG----- morL 26 1
-----TTGGATGAGCCCTCGGAGGA----- morL 20 1
-----GATGAGCCCTCGGAGGAC----- morL 18 1
-----ACTCCATTTGTTTTGATGATGG----- mirL 22 29176
-----ACTCCATTTGTTTTGATGATG----- mirL 21 4803
-----ACTCCATTTGTTTTGATGATGGA----- mirL 23 3374
-----GGACTCCATTTGTTTTGATGAT----- mirL 22 1185
-----ACTCCATTTGTTTTGATGATGGAT----- mirL 24 670
-----ACTCCATTTGTTTTGATGAT----- mirL 20 642
-----GGACTCCATTTGTTTTGATGATG----- mirL 23 371
-----AGGACTCCATTTGTTTTGATGAT----- mirL 23 352
-----ACTCCATTTGTTTTGATGA----- mirL 19 312
-----GGACTCCATTTGTTTTGATGA----- mirL 21 253
-----AGGACTCCATTTGTTTTGATGA----- mirL 22 244
-----ACTCCATTTGTTTTGATGATGGATT----- mirL 25 207
-----GACTCCATTTGTTTTGATGAT----- mirL 21 184
-----GACTCCATTTGTTTTGATGATG----- mirL 22 177
-----GACTCCATTTGTTTTGATGATGG----- mirL 23 134
-----AGGACTCCATTTGTTTTGATGATG----- mirL 24 58
-----GACTCCATTTGTTTTGATGA----- mirL 20 46
-----CTCCATTTGTTTTGATGATGG----- mirL 21 36
-----CTCCATTTGTTTTGATGATGGA----- mirL 22 27
-----AGGACTCCATTTGTTTTGATG----- mirL 21 22
-----CTCCATTTGTTTTGATGATG----- mirL 20 21
-----GGACTCCATTTGTTTTGATGATGG----- mirL 24 11
-----GACTCCATTTGTTTTGATGATGGA----- mirL 24 10
-----GACTCCATTTGTTTTGATG----- mirL 19 10
-----AGGACTCCATTTGTTTTGAT----- mirL 20 8
-----CTCCATTTGTTTTGATGAT----- mirL 19 8
-----TCCATTTGTTTTGATGATGG----- mirL 20 8
-----CCATTTGTTTTGATGATGG----- mirL 19 7
-----TCCATTTGTTTTGATGATG----- mirL 19 6
-----CTCCATTTGTTTTGATGA----- mirL 18 5
-----GGACTCCATTTGTTTTGA----- mirL 18 5
-----CCATTTGTTTTGATGATG----- mirL 18 4
-----GGACTCCATTTGTTTTGATGATGGAT----- mirL 26 3
-----CTCCATTTGTTTTGATGATGGAT----- mirL 23 3
-----CCATTTGTTTTGATGATGGATT----- mirL 22 2
-----GGACTCCATTTGTTTTGATG----- mirL 20 2
-----CTCCATTTGTTTTGATGATGGATT----- mirL 24 2
-----CCATTTGTTTTGATGATGGA----- mirL 20 1

```

```

-----AGGACTCCATTTGTTTTGATGATGG----- mirL 25 1
-----TCCATTTGTTTTGATGATGGA----- mirL 21 1
-----AGGACTCCATTTGTTTTGA----- mirL 19 1
-----GACTCCATTTGTTTTGATGGATTC----- mirL 27 1
-----TGGATTCTTAAGCTCCAT----- loop 18 1
-----CATCATCGTCTCAAATGAGTCT----- mirR 22 8342
-----ATCATCGTCTCAAATGAGTCT----- mirR 21 2742
-----CATCGTCTCAAATGAGTCTTCA----- mirR 22 1087
-----CATCGTCTCAAATGAGTCTTC----- mirR 21 902
-----TCATCGTCTCAAATGAGTCTT----- mirR 21 710
-----TCATCGTCTCAAATGAGTCTTC----- mirR 22 648
-----CATCATCGTCTCAAATGAGTC----- mirR 21 598
-----ATCATCGTCTCAAATGAGTCTT----- mirR 22 502
-----CATCATCGTCTCAAATGAGTCTT----- mirR 23 354
-----TCATCGTCTCAAATGAGTCTTCA----- mirR 23 326
-----ATCATCGTCTCAAATGAGTCTTC----- mirR 23 195
-----CATCGTCTCAAATGAGTCTT----- mirR 20 191
-----CATCATCGTCTCAAATGAGTCTTC----- mirR 24 108
-----TCATCGTCTCAAATGAGTCT----- mirR 20 104
-----ATCATCGTCTCAAATGAGTC----- mirR 20 93
-----CATCGTCTCAAATGAGTCTTCA----- mirR 23 87
-----ATCATCGTCTCAAATGAGTCTTCA----- mirR 24 55
-----CATCATCGTCTCAAATGAGT----- mirR 20 50
-----TCATCGTCTCAAATGAGTC----- mirR 19 34
-----ATCATCGTCTCAAATGAGT----- mirR 19 29
-----CATCGTCTCAAATGAGTCTTCAGA----- mirR 24 22
-----CCATCATCGTCTCAAATGAGTCT----- mirR 23 21
-----TCATCGTCTCAAATGAGTCTTCAG----- mirR 24 18
-----CATCGTCTCAAATGAGTCT----- mirR 19 14
-----CATCATCGTCTCAAATGAGTCTTCA----- mirR 25 6
-----CATCATCGTCTCAAATGA----- mirR 18 5
-----ATCATCGTCTCAAATGAG----- mirR 18 5
-----CATCGTCTCAAATGAGTC----- mirR 18 4
-----TCCATCATCGTCTCAAATGAGTCT----- mirR 24 2
-----CCATCATCGTCTCAAATG----- mirR 18 2
-----CTCCATCATCGTCTCAAATGAGTCTTC----- mirR 27 1
-----TCATCGTCTCAAATGAGTCTTCA----- mirR 26 1
-----TCAGAGGGTTCTATCATGTGCGTC morR 23 3
-----TCTTCAGAGGGTTCTATC----- morR 18 2
-----GAGGGTTCTATCATGTGCG-- morR 18 1

>mmu-mir-494
CAGTGCTAATTGATACTTGAAGGAGAGGTTGTCGGTGTGTCTTCTCTTTATTTATGATGAAACATACACGGGAAACCTCTTTTTTAGTATCAAATCCCACCC species len reads
----GCTAATTGATACTTGAAGGAG----- morL 21 89
----TGCTAATTGATACTTGAAGGAG----- morL 22 20
----CTAATTGATACTTGAAGGAG----- morL 20 20

```

```

CAGTGCTAATTGATACTTGAAGGAG----- morL 25 17
--GTGCTAATTGATACTTGAAGGAG----- morL 23 10
----CTAATTGATACTTGAAGGAGA----- morL 21 2
---GCTAATTGATACTTGAAGGAGA----- morL 22 2
-AGTGCTAATTGATACTTGAAGGAG----- morL 24 2
----CTAATTGATACTTGAAGGA----- morL 19 1
-----AATTGATACTTGAAGGAGA----- morL 19 1
--GTGCTAATTGATACTTGAAG----- morL 20 1
----ATTGATACTTGAAGGAGAG----- morL 19 1
-----AATTGATACTTGAAGGAG----- morL 18 1
-----AGGTTGTCCGTGTTGTCTTCTC----- mirL 22 361
-----AGGTTGTCCGTGTTGTCTTCTCT----- mirL 23 51
-----AGGTTGTCCGTGTTGTCTTCT----- mirL 21 48
-----GAGAGGTTGTCCGTGTTGTCTT----- mirL 22 41
-----GAGAGGTTGTCCGTGTTGTCTT----- mirL 23 16
-----GAGGTTGTCCGTGTTGTCT----- mirL 18 14
-----AGGTTGTCCGTGTTGTCTT----- mirL 20 14
-----AGAGGTTGTCCGTGTTGTCTT----- mirL 22 13
-----GAGGTTGTCCGTGTTGTCTT----- mirL 21 11
-----GAGAGGTTGTCCGTGTTGTCTTCT----- mirL 24 7
-----GAGGTTGTCCGTGTTGTCTT----- mirL 20 6
-----GAGGTTGTCCGTGTTGTCTTCT----- mirL 22 6
-----AGGTTGTCCGTGTTGTCTTCTCTT----- mirL 24 4
-----AGGTTGTCCGTGTTGTCTTCTCTT----- mirL 25 3
-----AGGTTGTCCGTGTTGTCTT----- mirL 19 2
-----GAGGTTGTCCGTGTTGTCT----- mirL 19 2
-----TTGTCCGTGTTGTCTTCTC----- mirL 19 1
-----GAGAGGTTGTCCGTGTTGTCT----- mirL 20 1
-----AGAGGTTGTCCGTGTTGTCTT----- mirL 21 1
-----GAGAGGTTGTCCGTGTTG----- mirL 18 1
-----TGAAACATACACGGGAAACCTCT----- mirR 23 38235
-----TGAAACATACACGGGAAACCTCT----- mirR 24 7062
-----TGAAACATACACGGGAAACCT----- mirR 21 3963
-----TGAAACATACACGGGAAACCTC----- mirR 22 2783
-----GAAACATACACGGGAAACCTCT----- mirR 22 2276
-----TGAAACATACACGGGAAACCTCTTT----- mirR 25 1025
-----TGAAACATACACGGGAAACC----- mirR 20 481
-----AACATACACGGGAAACCTCTTT----- mirR 22 443
-----GAAACATACACGGGAAACCTCTT----- mirR 23 396
-----TGAAACATACACGGGAAACCTCTTT----- mirR 26 209
-----GAAACATACACGGGAAACCT----- mirR 20 184
-----GAAACATACACGGGAAACCTC----- mirR 21 113
-----AACATACACGGGAAACCTCTTT----- mirR 23 104
-----AACATACACGGGAAACCTCTTTTT----- mirR 25 75
-----AACATACACGGGAAACCTCTT----- mirR 21 75
-----AACATACACGGGAAACCTTTTT----- mirR 24 62

```

```

-----AAACATACACGGGAAACCT----- mirR 19 58
-----AACATACACGGGAAACCT----- mirR 18 56
-----GAAACATACACGGGAAACCTCTTT----- mirR 24 54
-----AACATACACGGGAAACCTC----- mirR 19 48
-----AAACATACACGGGAAACCTCT----- mirR 21 45
-----AAACATACACGGGAAACCTCTT----- mirR 22 25
-----GAAACATACACGGGAAACC----- mirR 19 23
-----ATGAAACATACACGGGAAACCTCT----- mirR 24 22
-----TGATGAAACATACACGGGAAACCT----- mirR 24 12
-----ATGAAACATACACGGGAAACCTC----- mirR 23 10
-----ATGAAACATACACGGGAAACCT----- mirR 22 5
-----GAAACATACACGGGAAACCTCTTTT----- mirR 26 4
-----AAACATACACGGGAAACC----- mirR 18 4
-----ATGAAACATACACGGGAAACCTCTT----- mirR 25 2
-----AAACATACACGGGAAACCTCTTT----- mirR 23 1
-----AAACATACACGGGAAACCTC----- mirR 20 1
-----GATGAAACATACACGGGAAACCTCT----- mirR 25 1
-----GATGAAACATACACGGGAAACCT----- mirR 23 1
-----TTTTTAGTATCAAATCCCACCC morR 22 2
-----TTTTTAGTATCAAATCCC----- morR 18 1

```

>mmu-mir-721

```

ATTCAGGTTTCCTGGGAAGACAGTGAATTTAAAGGGGGAAAAAAGTACCTGGGATGTTCTGAGAATTTTCATTTTTCTTGTTATTGCCACTCCTGCTTGGA species len reads
-----AGGTTTCCTGGGAAGACA----- morL 18 2
-----CAGGTTTCCTGGGAAGAC----- morL 18 1
ATTCAGGTTTCCTGGGAAG----- morL 19 1
-----CAGTGAATTTAAAGGGGGAA----- mirL 21 1397
-----CAGTGAATTTAAAGGGGGAA----- mirL 20 90
-----GTGCAATTTAAAGGGGGAA----- mirL 19 31
-----AGTGAATTTAAAGGGGGAA----- mirL 20 24
-----TGCAATTTAAAGGGGGAA----- mirL 18 12
-----CAGTGAATTTAAAGGGGG----- mirL 19 11
-----CAGTGAATTTAAAGGGG----- mirL 18 10
-----CAGTGAATTTAAAGGGGGAAA----- mirL 22 7
-----AGTGAATTTAAAGGGGGAA----- mirL 19 3
-----CAGTGAATTTAAAGGGGGAAAA----- mirL 23 2
-----ACAGTGAATTTAAAGGG----- mirL 18 1
-----GTGCAATTTAAAGGGGGAAA----- mirL 20 1
-----AAAGTACCTGGGATGTTCT----- loop 18 2
-----AAGTACCTGGGATGTTCT----- loop 18 1
-----AGAATTTTCATTTTTCTTG----- mirR 18 46149
-----GAATTTTCATTTTTCTTG----- mirR 18 4600
-----AGAATTTTCATTTTTCTTG----- mirR 19 3179
-----AGAATTTTCATTTTTCTTGTT----- mirR 20 361
-----GAATTTTCATTTTTCTTGTT----- mirR 19 249
-----GAATTTTCATTTTTCTTGTTA----- mirR 20 228

```

```

-----AGAATTTTCATTTTTCTTGTTA----- mirR 21 105
-----AATTTTCATTTTTCTTGTT----- mirR 18 18
-----GAATTTTCATTTTTCTTGTTAT----- mirR 21 18
-----AGAATTTTCATTTTTCTTGTTAT----- mirR 22 7
-----AATTTTCATTTTTCTTGTTA----- mirR 19 5
-----GAGAATTTTCATTTTTCTTG----- mirR 19 4
-----GAATTTTCATTTTTCTTGTTATT----- mirR 22 3
-----GAGAATTTTCATTTTTCTT----- mirR 18 1
-----GAGAATTTTCATTTTTCTTGT----- mirR 20 1
-----AGAATTTTCATTTTTCTTGTTATTG----- mirR 24 1
-----AATTTTCATTTTTCTTGTTAT----- mirR 20 1
-----ATTTTCATTTTTCTTGTTA----- mirR 18 1
-----TATTGCCACTCCTGCTTG-- morR 18 2
-----TTGCCACTCCTGCTTGGA morR 18 2
-----GTTATTGCCACTCCTGCT--- morR 18 1
-----ATTGCCACTCCTGCTTG- morR 18 1

```

>mmu-mir-126

```

CGCATCTTTGCCGGTGACAGCACATTATTACTTTTGGTACGCGCTGTGACACTTCAAACCTGACCGTGAGTAATAATGCGCGGTCAGCAGCCCAGCGCCAGGAATGCATCGGACC species len reads
--CATCTTTGCCGGTGACAGCA----- morL 20 11
---ATCTTTGCCGGTGACAGCA----- morL 19 4
---TCTTTGCCGGTGACAGCA----- morL 18 2
---ATCTTTGCCGGTGACAGCAC----- morL 20 2
-GCATCTTTGCCGGTGACAGCA----- morL 21 2
---ATCTTTGCCGGTGACAGCACAT----- morL 22 1
CGCATCTTTGCCGGTGACAGCA----- morL 22 1
-----CATTATTACTTTTGGTACGCG----- mirL 21 13868
-----CATTATTACTTTTGGTACGCG----- mirL 22 4357
-----CATTATTACTTTTGGTACGCG----- mirL 20 941
-----CATTATTACTTTTGGTACGCGCT----- mirL 23 768
-----CATTATTACTTTTGGTACG----- mirL 19 764
-----CATTATTACTTTTGGTAC----- mirL 18 105
-----ATTATTACTTTTGGTACGCG----- mirL 20 37
-----CATTATTACTTTTGGTACGCGCTG----- mirL 24 35
-----TATTACTTTTGGTACGCG----- mirL 18 19
-----GCACATTATTACTTTTGGTACG----- mirL 22 4
-----ACATTATTACTTTTGGTACGCG----- mirL 22 2
-----ACATTATTACTTTTGGTA----- mirL 18 2
-----ACATTATTACTTTTGGTACGCG----- mirL 21 2
-----ATTATTACTTTTGGTACGCGCT----- mirL 22 2
-----CACATTATTACTTTTGGT----- mirL 18 2
-----ATTATTACTTTTGGTACGCG----- mirL 21 2
-----ATTATTACTTTTGGTACGCG----- mirL 19 1
-----TTATTACTTTTGGTACGCG----- mirL 19 1
-----ATTATTACTTTTGGTACG----- mirL 18 1
-----ACATTATTACTTTTGGTACGCGCT----- mirL 24 1

```

```

-----GCTGTGACACTTCAAAC----- loop 18 5
-----CGCTGTGACACTTCAAAC----- loop 18 2
-----GCGCTGTGACACTTCAAA----- loop 18 1
-----GCGCTGTGACACTTCAAAC----- loop 19 1
-----CTGTGACACTTCAAACTCG----- loop 19 1
-----TGTGACACTTCAAACTCG----- loop 18 1
-----CGTACCGTGAGTAATAATGCG----- mirR 21 14269
-----CGTACCGTGAGTAATAATGCGC----- mirR 22 7217
-----TCGTACCGTGAGTAATAATGCG----- mirR 22 6708
-----TCGTACCGTGAGTAATAATGC----- mirR 21 1695
-----CGTACCGTGAGTAATAATGC----- mirR 20 1395
-----TCGTACCGTGAGTAATAATGCGC----- mirR 23 1303
-----CGTACCGTGAGTAATAATG----- mirR 19 650
-----TCGTACCGTGAGTAATAATG----- mirR 20 535
-----CGTACCGTGAGTAATAATGCGCG----- mirR 23 360
-----CTCGTACCGTGAGTAATAATGCG----- mirR 23 237
-----CTCGTACCGTGAGTAATAATGC----- mirR 22 106
-----TCGTACCGTGAGTAATAATGCGCG----- mirR 24 94
-----CTCGTACCGTGAGTAATAATGCGC----- mirR 24 47
-----CGTACCGTGAGTAATAATGCGCG----- mirR 24 40
-----CTCGTACCGTGAGTAATAATG----- mirR 21 30
-----GTACCGTGAGTAATAATGCGC----- mirR 21 24
-----TCGTACCGTGAGTAATAAT----- mirR 19 20
-----CGTACCGTGAGTAATAAT----- mirR 18 17
-----TCGTACCGTGAGTAATAATGCGCG----- mirR 25 16
-----CTCGTACCGTGAGTAATAA----- mirR 19 5
-----GTACCGTGAGTAATAATG----- mirR 18 5
-----GTACCGTGAGTAATAATGC----- mirR 19 5
-----CTCGTACCGTGAGTAATAAT----- mirR 20 4
-----TACCGTGAGTAATAATGC----- mirR 18 3
-----GTACCGTGAGTAATAATGCGCG----- mirR 22 3
-----GTACCGTGAGTAATAATGCG----- mirR 20 2
-----TACCGTGAGTAATAATGCGC----- mirR 20 2
-----CTCGTACCGTGAGTAATAATGCGCG----- mirR 25 2
-----TACCGTGAGTAATAATGCGCG----- mirR 21 1
-----ACTCGTACCGTGAGTAATA----- mirR 19 1
-----TACCGTGAGTAATAATGCG----- mirR 19 1
-----GTACCGTGAGTAATAATGCGCG----- mirR 23 1
-----ACTCGTACCGTGAGTAAT----- mirR 18 1
-----CGGTCAGCAGCCCAGCGCCA----- morR 20 24
-----CGGTCAGCAGCCCAGCGCCAGGAATGCATCGGACC----- morR 35 3
-----CGGTCAGCAGCCCAGCGCCAGGAATGC----- morR 27 2
-----CGGTCAGCAGCCCAGCGCCAG----- morR 21 1
-----CGGTCAGCAGCCCAGCGCC----- morR 19 1

```

>mmu-mir-320

| Sequence                                                                                    | species | len | reads |
|---------------------------------------------------------------------------------------------|---------|-----|-------|
| GGTGCCTCGCCGCCCTCCGCTTCTTCCCGGTTCTTCCCGGAGTCGGGAAAAGCTGGGTTGAGAGGGCGAAAAAGGATGTGGGAGGTGGACT | morL    | 18  | 3     |
| --TGCCTCGCCGCCCTCCGC--                                                                      | morL    | 18  | 1     |
| GGTGCCTCGCCGCCCTCC                                                                          | morL    | 19  | 1     |
| GGTGCCTCGCCGCCCTCCG                                                                         | mirL    | 22  | 277   |
| -----GCCTTCTCTTCCCGGTTCTTCC-----                                                            | mirL    | 21  | 46    |
| -----GCCTTCTCTTCCCGGTTCTTCC-----                                                            | mirL    | 23  | 22    |
| -----TCCGCCTTCTCTTCCCGGTTCTT-----                                                           | mirL    | 23  | 10    |
| -----GCCTTCTCTTCCCGGTTCTTCC-----                                                            | mirL    | 20  | 9     |
| -----GCCTTCTCTTCCCGGTTCTTCC-----                                                            | mirL    | 18  | 8     |
| -----CGCCTTCTCTTCCCGGTTCTTCC-----                                                           | mirL    | 23  | 5     |
| -----GCCTTCTCTTCCCGGTTCTTCCCGGA-----                                                        | mirL    | 26  | 5     |
| -----CGCCTTCTCTTCCCGGTTCTTCC-----                                                           | mirL    | 22  | 4     |
| -----CTTCTCTTCCCGGTTCTTCC-----                                                              | mirL    | 20  | 2     |
| -----TCCGCCTTCTCTTCCCGGTTCTT-----                                                           | mirL    | 22  | 2     |
| -----TCCGCCTTCTCTTCCCGGTTCTTCC-----                                                         | mirL    | 24  | 2     |
| -----CTTCTCTTCCCGGTTCTTCCCGGA-----                                                          | mirL    | 24  | 2     |
| -----CTTCTCTTCCCGGTTCTTCCCGGAG-----                                                         | mirL    | 25  | 1     |
| -----CCTTCTCTTCCCGGTTCTT-----                                                               | mirL    | 19  | 1     |
| -----TCCGCCTTCTCTTCCCGGT-----                                                               | mirL    | 19  | 1     |
| -----CCGCCTTCTCTTCCCGGTTCTTCC-----                                                          | mirL    | 23  | 1     |
| -----TTCTCTTCCCGGTTCTTCC-----                                                               | mirL    | 19  | 1     |
| -----TCCGCCTTCTCTTCCCGG-----                                                                | mirL    | 18  | 1     |
| -----TTCTCTTCCCGGTTCTTCCCG-----                                                             | mirL    | 21  | 1     |
| -----CGCCTTCTCTTCCCGGTTCC-----                                                              | mirL    | 19  | 1     |
| -----AAAAGCTGGGTTGAGAGGGCGA-----                                                            | mirR    | 22  | 17402 |
| -----AAAAGCTGGGTTGAGAGGGCGAA-----                                                           | mirR    | 23  | 10437 |
| -----AAAAGCTGGGTTGAGAGGGCGAAA-----                                                          | mirR    | 24  | 10104 |
| -----AAAAGCTGGGTTGAGAGGGCGAAAA-----                                                         | mirR    | 25  | 2079  |
| -----AAAGCTGGGTTGAGAGGGCGA-----                                                             | mirR    | 21  | 2066  |
| -----AAGCTGGGTTGAGAGGGCGAAA-----                                                            | mirR    | 22  | 2004  |
| -----AAAAGCTGGGTTGAGAGGGCG-----                                                             | mirR    | 21  | 1916  |
| -----AAAGCTGGGTTGAGAGGGCGAAA-----                                                           | mirR    | 23  | 1682  |
| -----AAAGCTGGGTTGAGAGGGCGAA-----                                                            | mirR    | 22  | 1358  |
| -----AAGCTGGGTTGAGAGGGCGAA-----                                                             | mirR    | 21  | 1070  |
| -----AAAAGCTGGGTTGAGAGGGCG-----                                                             | mirR    | 20  | 1016  |
| -----AAAAGCTGGGTTGAGAGGGCG-----                                                             | mirR    | 19  | 821   |
| -----AAGCTGGGTTGAGAGGGCGA-----                                                              | mirR    | 20  | 757   |
| -----AAGCTGGGTTGAGAGGGCGAAAA-----                                                           | mirR    | 23  | 507   |
| -----GAAAAGCTGGGTTGAGAGGGCGA-----                                                           | mirR    | 23  | 461   |
| -----AAAGCTGGGTTGAGAGGGCGAAAA-----                                                          | mirR    | 24  | 409   |
| -----AAAGCTGGGTTGAGAGGGCG-----                                                              | mirR    | 20  | 237   |
| -----AAAGCTGGGTTGAGAGGGCGAAAA-----                                                          | mirR    | 25  | 128   |
| -----AAGCTGGGTTGAGAGGGCGAAAA-----                                                           | mirR    | 24  | 122   |
| -----GAAAAGCTGGGTTGAGAGGGCG-----                                                            | mirR    | 22  | 109   |
| -----AAAGCTGGGTTGAGAGGGCG-----                                                              | mirR    | 19  | 104   |

```

-----GAAAAGCTGGGTTGAGAGGGCGAA----- mirR 24 103
-----GAAAAGCTGGGTTGAGAGGGCGAAA----- mirR 25 90
-----AAGCTGGGTTGAGAGGGCG----- mirR 19 73
-----GAAAAGCTGGGTTGAGAGGG----- mirR 20 40
-----GAAAAGCTGGGTTGAGAGGGCGAAAA----- mirR 26 37
-----AAGCTGGGTTGAGAGGGC----- mirR 18 36
-----GAAAAGCTGGGTTGAGAGGGC----- mirR 21 35
-----AGCTGGGTTGAGAGGGCGA----- mirR 19 12
-----GGAAAAGCTGGGTTGAGAGGGCG----- mirR 23 9
-----AGCTGGGTTGAGAGGGCGAA----- mirR 20 8
-----AGCTGGGTTGAGAGGGCG----- mirR 18 2
-----AGCTGGGTTGAGAGGGCGAAA----- mirR 21 2
-----GGGAAAAGCTGGGTTGAGAGGGCGAAA----- mirR 27 1
-----AGCTGGGTTGAGAGGGCGAAAA----- mirR 23 1
-----GGAAAAGCTGGGTTGAGAGGG----- mirR 21 1
-----GGAAAAGCTGGGTTGAGAGGGCGAA----- mirR 25 1
-----AGCTGGGTTGAGAGGGCGAAAA----- mirR 22 1
-----AAGGATGTGGGAGGTGGA----- morR 18 11
-----AGGATGTGGGAGGTGGAC----- morR 18 3
-----GAAAAAGGATGTGGGAGGT----- morR 19 2
-----AAGGATGTGGGAGGTGGACT morR 20 1

```

>mmu-mir-192

```

CCAAGATGGCGTGCACAGGGCTCTGACCTATGAATTGACAGCCAGTACTCTTTTCTCTCCTCTGGCTGCCAATTCATAGGTCACAGGTATGTTACCTCAATGCCA species len reads
--AAGATGGCGTGCACAGGGCT----- morL 20 3
--AGATGGCGTGCACAGGGCTC----- morL 20 2
--AGATGGCGTGCACAGGGCT----- morL 19 2
CCAAGATGGCGTGCACAGGGCT----- morL 22 2
----ATGGCGTGCACAGGGCTC----- morL 18 1
-CAAGATGGCGTGCACAGGGCT----- morL 21 1
CCAAGATGGCGTGCACAGGGCTC----- morL 23 1
CCAAGATGGCGTGCACAGGGCTCT----- morL 24 1
-----CTGACCTATGAATTGACAGCC----- mirL 21 16468
-----CTGACCTATGAATTGACAGCCA----- mirL 22 13840
-----TGACCTATGAATTGACAGCCAG----- mirL 22 5144
-----CTGACCTATGAATTGACA----- mirL 18 4307
-----CTGACCTATGAATTGACAGC----- mirL 20 3167
-----TGACCTATGAATTGACAGCCAGT----- mirL 23 2915
-----TGACCTATGAATTGACAGCCA----- mirL 21 2232
-----CTGACCTATGAATTGACAGCCAG----- mirL 23 1382
-----CTGACCTATGAATTGACAGCCAGT----- mirL 24 640
-----TGACCTATGAATTGACAGCC----- mirL 20 568
-----CTGACCTATGAATTGACAG----- mirL 19 506
-----TGACCTATGAATTGACAGCCAGTA----- mirL 24 390
-----TGACCTATGAATTGACAGC----- mirL 19 122
-----TGACCTATGAATTGACAGCCAGTAC----- mirL 25 99

```



```

-----GACCTATGAATTGACAGCCAG----- mirL 21 58
-----GACCTATGAATTGACAGCCAGT----- mirL 22 21
-----GACCTATGAATTGACAGCCA----- mirL 20 17
-----GACCTATGAATTGACAGCC----- mirL 19 11
-----TCTGACCTATGAATTGACAGC----- mirL 21 5
-----ACCTATGAATTGACAGCCAGT----- mirL 21 4
-----GACCTATGAATTGACAGCCAGTA----- mirL 23 3
-----TCTGACCTATGAATTGACA----- mirL 19 3
-----GACCTATGAATTGACAGCCAGTAC----- mirL 24 2
-----CTCTGACCTATGAATTGACAGCCA----- mirL 24 1
-----GCTCTGACCTATGAATTGAC----- mirL 20 1
-----TCTGACCTATGAATTGACAGCCA----- mirL 23 1
-----ACCTATGAATTGACAGCCA----- mirL 19 1
-----GACCTATGAATTGACAGC----- mirL 18 1
-----ACCTATGAATTGACAGCC----- mirL 18 1
-----AGTACTCTTTTCTCCTCTGG----- loop 22 15
-----GTACTCTTTTCTCCTCTG----- loop 20 2
-----AGTACTCTTTTCTCCTC----- loop 19 2
-----AGTACTCTTTTCTCCTCTGGC----- loop 23 2
-----TACTCTTTTCTCCTCT----- loop 18 2
-----CAGTACTCTTTTCTCCTCTG----- loop 22 1
-----GTACTCTTTTCTCCTC----- loop 18 1
-----ACTCTTTTCTCCTCTG----- loop 18 1
-----CTGCCAATCCATAGGTCACAG----- mirR 22 1521
-----CTGCCAATCCATAGGTCACA----- mirR 21 831
-----GGCTGCCAATCCATAGGTCACA----- mirR 23 178
-----GCTGCCAATCCATAGGTCACAG----- mirR 23 130
-----CTGCCAATCCATAGGTCAC----- mirR 20 73
-----CTGCCAATCCATAGGTCACAGG----- mirR 23 72
-----GCTGCCAATCCATAGGTCACA----- mirR 22 69
-----GCTGCCAATCCATAGGTCACAGG----- mirR 24 54
-----GGCTGCCAATCCATAGGTCACAG----- mirR 24 32
-----CTGCCAATCCATAGGTCA----- mirR 19 16
-----GGCTGCCAATCCATAGGTCAC----- mirR 22 14
-----GCCAATCCATAGGTCACAG----- mirR 20 13
-----CTGCCAATCCATAGGTC----- mirR 18 11
-----GCTGCCAATCCATAGGTCACAGGT----- mirR 25 11
-----GCTGCCAATCCATAGGTCAC----- mirR 21 6
-----GGCTGCCAATCCATAGGTCAC----- mirR 21 5
-----CTGCCAATCCATAGGTCACAGGTA----- mirR 25 5
-----CCAATCCATAGGTCACA----- mirR 18 3
-----GGCTGCCAATCCATAGGTCACAGG----- mirR 25 2
-----GCTGCCAATCCATAGGTCAC----- mirR 20 1
-----TGCCAATCCATAGGTCACAG----- mirR 21 1
-----TGGCTGCCAATCCATAGGTCAC----- mirR 23 1
-----GGCTGCCAATCCATAGGTCACAGGT----- mirR 26 1

```

```
-----ATGTTACCTCAATGCCA morR 18 16
-----GTATGTTACCTCAATGC-- morR 18 1

>mmu-mir-872
TTGTGTAGATGGTAACTTGTTAGAAAGGTTACTTGTAGTTCAGGACCTCATTACTTTCTGCCTGAACTATTGCAGTAGCCTCCTAACTGGTTATCCCACCTCCAT species len reads
--GTGTAGATGGTAACTTGTTAG----- morL 21 17
---GTAGATGGTAACTTGTTAG----- morL 19 8
--TGATAGATGGTAACTTGTTAG----- morL 20 6
---TAGATGGTAACTTGTTAG----- morL 18 4
--GTGTAGATGGTAACTTGTTA----- morL 20 1
---TAGATGGTAACTTGTTAGAA----- morL 20 1
---GTAGATGGTAACTTGTTA----- morL 18 1
--GTGTAGATGGTAACTTGTTAGA----- morL 22 1
---TAGATGGTAACTTGTTAGA----- morL 19 1
TTGTGTAGATGGTAACTTGTT----- morL 21 1
-----AAGGTTACTTGTTAGTTCAGG----- mirL 21 6719
-----AAGGTTACTTGTTAGTTCAGGA----- mirL 22 3624
-----AAGGTTACTTGTTAGTTCAG----- mirL 20 2078
-----AAGGTTACTTGTTAGTTCAGGAC----- mirL 23 578
-----AAGGTTACTTGTTAGTTCAG----- mirL 19 269
-----AAGGTTACTTGTTAGTTCAGGACC----- mirL 24 134
-----AAGGTTACTTGTTAGTTCAG----- mirL 18 38
-----AGGTTACTTGTTAGTTCAGG----- mirL 20 10
-----GAAGGTTACTTGTTAGTTCAGG----- mirL 22 3
-----AGGTTACTTGTTAGTTCAG----- mirL 19 3
-----AGGTTACTTGTTAGTTCAGGACC----- mirL 23 2
-----AGAAGGTTACTTGTTAGT----- mirL 18 2
-----AGGTTACTTGTTAGTTCAGGACCT----- mirL 24 1
-----AGGTTACTTGTTAGTTCAGGA----- mirL 21 1
-----TAGAAGGTTACTTGTTAG----- mirL 18 1
-----GAAGGTTACTTGTTAGT----- mirL 18 1
-----GTTACTTGTTAGTTCAGG----- mirL 18 1
-----ACCTCATTACTTTCTGCC----- loop 18 101
-----ACCTCATTACTTTCTGCCT----- loop 19 14
-----ACCTCATTACTTTCTGCCTG----- loop 20 2
-----CCTCATTACTTTCTGCCTG----- loop 19 1
-----TGAACTATTGCAGTAGCCTCCT----- mirR 22 28350
-----TGAACTATTGCAGTAGCCTCCTA----- mirR 23 3889
-----TGAACTATTGCAGTAGCCTCC----- mirR 21 2706
-----TGAACTATTGCAGTAGCCTCCTAA----- mirR 24 2066
-----GAACTATTGCAGTAGCCTCCT----- mirR 21 1603
-----TGAACTATTGCAGTAGCCTCCTAAC----- mirR 25 741
-----TGAACTATTGCAGTAGCCTC----- mirR 20 624
-----GAACTATTGCAGTAGCCTCCTA----- mirR 22 228
-----CTGAACTATTGCAGTAGCCTCCT----- mirR 23 220
-----GAACTATTGCAGTAGCCTCC----- mirR 20 163
```

```

-----TGAACTATTGCAGTAGCCT----- mirR 19 143
-----GAACTATTGCAGTAGCCTCCTAA----- mirR 23 84
-----CTGAACTATTGCAGTAGCCTCC----- mirR 22 72
-----CTGAACTATTGCAGTAGCCTCCTA----- mirR 24 30
-----GAACTATTGCAGTAGCCTC----- mirR 19 30
-----GAACTATTGCAGTAGCCTCCTAAC----- mirR 24 26
-----GAACTATTGCAGTAGCCT----- mirR 18 14
-----AACTATTGCAGTAGCCTCCT----- mirR 20 12
-----CTGAACTATTGCAGTAGCCTCCTAA----- mirR 25 9
-----CTGAACTATTGCAGTAGCCTC----- mirR 21 8
-----ACTATTGCAGTAGCCTCCT----- mirR 19 6
-----CTGAACTATTGCAGTAGCCT----- mirR 20 4
-----CTGAACTATTGCAGTAGCCTCCTAAC----- mirR 26 3
-----CCTGAACTATTGCAGTAGCCTCCT----- mirR 24 2
-----AACTATTGCAGTAGCCTCCTA----- mirR 21 1
-----CCTGAACTATTGCAGTAGCCTCC----- mirR 23 1
-----ACTATTGCAGTAGCCTCC----- mirR 18 1
-----AACTGGTTATCCCACCTCC-- morR 19 19
-----AACTGGTTATCCCACCTCCA- morR 20 14
-----TGTTATCCCACCTCCAT morR 18 5
-----CTGGTTATCCCACCTCCA- morR 18 2
-----AACTGGTTATCCCACCTC-- morR 18 2
-----AACTGGTTATCCCACCTCCAT morR 21 1
-----CTAACTGGTTATCCCACC----- morR 18 1

>mmu-mir-98
CTAGACACATCTGCACATGCTGGGGTGAGGTAGTAAGTTGTATTGTTGTGGGGTAGGGATTTTAGGCCCCAGTAAGAAGATAACTATAACAACCTACTACTTTCCTTGGTGTGTGGCATATTCACAT species len
-----ACATCTGCACATGCTGGGG----- morL 19 138
----CACATCTGCACATGCTGGGG----- morL 20 77
----CATCTGCACATGCTGGGG----- morL 18 20
---GACACATCTGCACATGCTGGGG----- morL 22 9
----ACATCTGCACATGCTGGG----- morL 18 5
-----ATCTGCACATGCTGGGGT----- morL 18 4
----ACACATCTGCACATGCTGGGG----- morL 21 3
----ACATCTGCACATGCTGGGGT----- morL 20 3
-TAGACACATCTGCACATGCTG----- morL 21 2
-----ACATCTGCACATGCTGGGGTG----- morL 21 1
----CACATCTGCACATGCTGGG----- morL 19 1
----ACACATCTGCACATGCTGGGGT----- morL 22 1
-TAGACACATCTGCACATGCTGG----- morL 22 1
CTAGACACATCTGCACATGCTG----- morL 22 1
-----CTGCACATGCTGGGGTGA----- morL 18 1
----CATCTGCACATGCTGGGGT----- morL 19 1
-----TGAGGTAGTAAGTTGTATTGTT----- mirL 22 36260
-----TGAGGTAGTAAGTTGTATTGT----- mirL 21 5182
-----TGAGGTAGTAAGTTGTATTGTTG----- mirL 23 2828

```

```

-----TGAGGTAGTAAGTTGTATTG----- mirL 20 522
-----TGAGGTAGTAAGTTGTATTGTTGT----- mirL 24 357
-----GAGGTAGTAAGTTGTATTGTT----- mirL 21 319
-----TGAGGTAGTAAGTTGTATT----- mirL 19 223
-----TGAGGTAGTAAGTTGTATTGTTGTG----- mirL 25 94
-----GAGGTAGTAAGTTGTATTGT----- mirL 20 84
-----GAGGTAGTAAGTTGTATTGTTG----- mirL 22 40
-----GAGGTAGTAAGTTGTATTG----- mirL 19 23
-----AGGTAGTAAGTTGTATTGTT----- mirL 20 18
-----GTGAGGTAGTAAGTTGTATTGTT----- mirL 23 16
-----AGGTAGTAAGTTGTATTGTTGT----- mirL 22 11
-----GAGGTAGTAAGTTGTATTGTTGT----- mirL 23 8
-----GAGGTAGTAAGTTGTATTGTTGTG----- mirL 24 7
-----GAGGTAGTAAGTTGTATT----- mirL 18 7
-----GGTAGTAAGTTGTATTGTT----- mirL 19 5
-----GTGAGGTAGTAAGTTGTATTGT----- mirL 22 4
-----GGTAGTAAGTTGTATTGT----- mirL 18 1
-----GGTAGTAAGTTGTATTGT----- mirL 20 1
-----GGTAGTAAGTTGTATTGT----- mirL 23 1
-----GTGAGGTAGTAAGTTGTA----- mirL 18 1
-----GTGGGGTAGGGATTTTAGGCCCCAGTAAGAAGAT----- loop 34 1
-----CTATACAACCTTACTACTTTCCT----- mirR 22 4426
-----CTATACAACCTTACTACTTTCCTT----- mirR 23 843
-----TATACAACCTTACTACTTTCCTT----- mirR 22 680
-----CTATACAACCTTACTACTTTC----- mirR 21 482
-----TATACAACCTTACTACTTTCCT----- mirR 21 272
-----TATACAACCTTACTACTTTCCTTG----- mirR 23 226
-----CTATACAACCTTACTACTTTC----- mirR 20 116
-----CTATACAACCTTACTACTTTCCTTG----- mirR 24 67
-----TATACAACCTTACTACTTTC----- mirR 20 49
-----ATACAACCTTACTACTTTCCTT----- mirR 21 47
-----TATACAACCTTACTACTTTCCTTGG----- mirR 24 47
-----ACTATACAACCTTACTACTTTC----- mirR 22 42
-----ATACAACCTTACTACTTTCCT----- mirR 20 34
-----CTATACAACCTTACTACTT----- mirR 18 32
-----TATACAACCTTACTACTTTC----- mirR 19 29
-----CTATACAACCTTACTACTTTCCTTGG----- mirR 25 21
-----ATACAACCTTACTACTTTCCTTG----- mirR 22 15
-----ACTATACAACCTTACTACTTTC----- mirR 21 12
-----ACTATACAACCTTACTACTTTCCT----- mirR 23 11
-----AACTATACAACCTTACTACTTTC----- mirR 23 9
-----TATACAACCTTACTACTTTCCTTGGTGTG----- mirR 28 8
-----ATACAACCTTACTACTTTCCTTGG----- mirR 23 5
-----ATACAACCTTACTACTTTC----- mirR 18 5
-----TACAACCTTACTACTTTCCT----- mirR 19 3
-----ATACAACCTTACTACTTTC----- mirR 19 1

```

```
-----TAACTATACAACCTACTA----- mirR 18 1
-----TACAACCTACTACTTTCC----- mirR 18 1
-----TTGGTGTGTGGCATATTCACAT morR 22 1

>mmu-mir-702
TGCAAGAGCGTCCGGGACAAGGTGAGTGGGGTGGTTGGCATGGGTTGCCCATGGGGACTCGACGCTGTGCCACAGCCTCCTGATGTCCTCCTCACGCATGCCACCCTTTACCCCGCTCCAGGCATCTTCTCCACCTC
---AAGAGCGTCCGGGACAAG-----
TGCAAGAGCGTCCGGGAC-----
-----GTGAGTGGGGTGGTTGGCATG-----
-----GTGAGTGGGGTGGTTGGCATGG-----
-----GTGAGTGGGGTGGTTGGCATGGG-----
-----GTGAGTGGGGTGGTTGGCATGGGT-----
-----TGAGTGGGGTGGTTGGCATGGGT-----
-----TGAGTGGGGTGGTTGGCATG-----
-----TGAGTGGGGTGGTTGGCATGGGTT-----
-----TGAGTGGGGTGGTTGGCATGGG-----
-----GTGAGTGGGGTGGTTGGCAT-----
-----TGAGTGGGGTGGTTGGCATGG-----
-----GTGAGTGGGGTGGTTGGCATGGGTT-----
-----GTGAGTGGGGTGGTTGGCATGGGTT-----
-----GTGAGTGGGGTGGTTGGCATGGGTTGC-----
-----AGTGGGGTGGTTGGCATG-----
-----TGAGTGGGGTGGTTGGCATGGGTTGCC-----
-----TGAGTGGGGTGGTTGGCATGGGTTGC-----
-----AGGTGAGTGGGGTGGTTG-----
-----AGGTGAGTGGGGTGGTTGG-----
-----AGTGGGGTGGTTGGCATGG-----
-----GAGTGGGGTGGTTGGCATGG-----
-----TGCCCACCCTTTACCCCGCTCCAGG-----
-----TGCCCACCCTTTACCCCGCTCCAG-----
-----TGCCCACCCTTTACCCCGCTC-----
-----TGCCCACCCTTTACCCCGCTCCAGGG-----
-----TGCCCACCCTTTACCCCGCTCCAGGGC-----
-----TGCCCACCCTTTACCCCGCTCCA-----
-----TGCCCACCCTTTACCCCGCT-----
-----GCCACCCTTTACCCCGCTCCAGG-----
-----ATGCCACCCTTTACCCCGCTCCAGG-----
-----GCCACCCTTTACCCCGCTC-----
-----CATGCCACCCTTTACCCCGCTCCAGG-----
-----GCCACCCTTTACCCCGCTCCAG-----
-----CCCACCCTTTACCCCGCTC-----
-----ATGCCACCCTTTACCCCGCTCCAG-----
-----GCCACCCTTTACCCCGCTCCAGGG-----
-----GCCACCCTTTACCCCGCT-----
-----CCACCCTTTACCCCGCTC-----
-----CATGCCACCCTTTACCCCGCTCCA-----
-----CATGCCACCCTTTACCCCGCTCCAG-----
```

```

-----ATGCCACCCTTTACCCCGCTCCAGGG-----
-----GCCACCCTTTACCCCGCTCCA-----
-----GCCACCCTTTACCCCGCTCCAGGGC-----
-----CATGCCACCCTTTACCCCGCT-----
-----CATGCCACCCTTTACCCCGCTCC-----
-----ATGCCACCCTTTACCCCGCTCCAGGGC-----
-----ATGCCACCCTTTACCCCGCTCC-----
-----ATGCCACCCTTTACCCCGCTCCA-----
-----CATGCCACCCTTTACCCCGCTCCAGGG-----
-----ATGCCACCCTTTACCCCG-----
-----CATGCCACCCTTTACCCCG-----
-----CCCACCCTTTACCCCGCTCCAGG-----
-----CCCACCCTTTACCCCGCTCCAG-----
-----CCCACCCTTTACCCCGCTCCAGGGC-----
-----GCATCTTCCTCCACCTC-----
-----AGGGCATCTTCCTCCACCTC-----
-----CATCTTCCTCCACCTC-----
-----GGGCATCTTCCTCCACCT-----
-----GGCATCTTCCTCCACCTC-----
-----GGCATCTTCCTCCACCTC-----
-----ATCTTCCTCCACCTC-----
-----GGCATCTTCCTCCACCTC-----

```

>mmu-mir-142

|                                                                                                                           | species | len | rea   |
|---------------------------------------------------------------------------------------------------------------------------|---------|-----|-------|
| TCCCCGTGGACAGACAGACAGTGCAGTCAACCATAAAGTAGAAAGCACTACTAACAGCACTGGAGGGTGTAGTGTTCCTACTTTATGGATGAGTGCACGTGGGCTTCGGAGACCACGCCAC | morL    | 19  | 24    |
| -----ACAGACAGTGCAGTCACCC-----                                                                                             | morL    | 31  | 6     |
| TCCCCGTGGACAGACAGACAGTGCAGTCACC-----                                                                                      | morL    | 18  | 5     |
| -----ACAGACAGTGCAGTCACC-----                                                                                              | morL    | 18  | 5     |
| -----AGACAGACAGTGCAGTCA-----                                                                                              | morL    | 19  | 4     |
| -----GACAGACAGTGCAGTCACC-----                                                                                             | morL    | 20  | 3     |
| -----GACAGACAGTGCAGTCACCC-----                                                                                            | morL    | 19  | 3     |
| -----ACAGACAGACAGTGCAGTC-----                                                                                             | morL    | 18  | 2     |
| -----CAGACAGTGCAGTCACCC-----                                                                                              | morL    | 21  | 2     |
| -----GACAGACAGACAGTGCAGTCA-----                                                                                           | morL    | 18  | 2     |
| -----ACAGACAGACAGTGCAGT-----                                                                                              | morL    | 20  | 2     |
| -----ACAGACAGACAGTGCAGTCA-----                                                                                            | morL    | 18  | 2     |
| -----GACAGACAGTGCAGTCAC-----                                                                                              | morL    | 19  | 1     |
| -----GGACAGACAGACAGTGCAG-----                                                                                             | morL    | 19  | 1     |
| -----AGACAGACAGTGCAGTCAC-----                                                                                             | morL    | 21  | 1     |
| -----ACAGACAGACAGTGCAGTCAC-----                                                                                           | morL    | 21  | 1     |
| -----AGACAGACAGTGCAGTCACCC-----                                                                                           | morL    | 18  | 1     |
| -----GACAGACAGACAGTGCAG-----                                                                                              | morL    | 20  | 1     |
| -----AGACAGACAGTGCAGTCACC-----                                                                                            | mirL    | 22  | 18121 |
| -----CCCATAAAGTAGAAAGCACTAC-----                                                                                          | mirL    | 20  | 5222  |
| -----CCCATAAAGTAGAAAGCACT-----                                                                                            | mirL    | 22  | 4754  |
| -----ACCCATAAAGTAGAAAGCACTA-----                                                                                          |         |     |       |

```

-----CCCATAAAGTAGAAAGCACTA----- mirL 21 3823
-----CATAAAGTAGAAAGCACTACT----- mirL 21 2893
-----CCCATAAAGTAGAAAGCACTACT----- mirL 23 2572
-----CATAAAGTAGAAAGCACTACTA----- mirL 22 1547
-----ACCCATAAAGTAGAAAGCACT----- mirL 21 429
-----ACCCATAAAGTAGAAAGCACTAC----- mirL 23 341
-----CATAAAGTAGAAAGCACTAC----- mirL 20 292
-----CATAAAGTAGAAAGCACTACTAA----- mirL 23 201
-----CCCATAAAGTAGAAAGCAC----- mirL 19 197
-----CATAAAGTAGAAAGCACTA----- mirL 19 162
-----CCCATAAAGTAGAAAGCACTACTA----- mirL 24 60
-----CATAAAGTAGAAAGCACT----- mirL 18 53
-----ATAAAGTAGAAAGCACTACTAA----- mirL 22 50
-----ACCCATAAAGTAGAAAGCAC----- mirL 20 49
-----CCCATAAAGTAGAAAGCA----- mirL 18 41
-----ATAAAGTAGAAAGCACTACT----- mirL 20 40
-----CATAAAGTAGAAAGCACTACTAACAGCAC----- mirL 29 40
-----ATAAAGTAGAAAGCACTACTA----- mirL 21 26
-----CCATAAAGTAGAAAGCACTAC----- mirL 21 24
-----ACCCATAAAGTAGAAAGCACTACT----- mirL 24 21
-----CCATAAAGTAGAAAGCACT----- mirL 19 13
-----CACCCATAAAGTAGAAAGCACT----- mirL 22 10
-----ATAAAGTAGAAAGCACTA----- mirL 18 7
-----ACCCATAAAGTAGAAAGCA----- mirL 19 7
-----ATAAAGTAGAAAGCACTACTAACAGCAC----- mirL 28 5
-----ATAAAGTAGAAAGCACTACTAAC----- mirL 23 5
-----CCATAAAGTAGAAAGCACTA----- mirL 20 3
-----TCACCCATAAAGTAGAAAGCACTAC----- mirL 25 2
-----ACCCATAAAGTAGAAAGC----- mirL 18 2
-----TCACCCATAAAGTAGAAAGCACT----- mirL 23 1
-----CACCCATAAAGTAGAAAG----- mirL 18 1
-----CACCCATAAAGTAGAAAGCACTAC----- mirL 24 1
-----CCATAAAGTAGAAAGCACTACT----- mirL 22 1
-----CACCCATAAAGTAGAAAGC----- mirL 19 1
-----TCACCCATAAAGTAGAAAGCACTA----- mirL 24 1
-----ATAAAGTAGAAAGCACTACTAACAGCACT----- mirL 29 1
-----TAACAGCACTGGAGGGTGT----- loop 19 8
-----ACTAACAGCACTGGAGGG----- loop 18 4
-----TAACAGCACTGGAGGGTG----- loop 18 2
-----ACTAACAGCACTGGAGGGT----- loop 19 1
-----TAACAGCACTGGAGGGTGTA----- loop 20 1
-----AACAGCACTGGAGGGTGT----- loop 18 1
-----GTAGTGTTTCCTACTTTATGGA----- mirR 22 3563
-----TGTAGTGTTTCCTACTTTATGGA----- mirR 23 2480
-----TGTAGTGTTTCCTACTTTATGG----- mirR 22 2358
-----GTAGTGTTTCCTACTTTATGGAT----- mirR 23 565

```

```

-----GTAGTGTTCCTACTTTATGG----- mirR 21 455
-----AGTGTTCCTACTTTATGGATG----- mirR 22 424
-----TGTAGTGTTCCTACTTTATGGAT----- mirR 24 231
-----AGTGTTCCTACTTTATGGATGA----- mirR 23 226
-----TGTAGTGTTCCTACTTTATG----- mirR 21 154
-----GTAGTGTTCCTACTTTATGGATG----- mirR 24 120
-----TGTAGTGTTCCTACTTTATGGATG----- mirR 25 61
-----GTAGTGTTCCTACTTTATG----- mirR 20 51
-----AGTGTTCCTACTTTATGGAT----- mirR 21 31
-----TGTAGTGTTCCTACTTTAT----- mirR 20 30
-----TGTAGTGTTCCTACTTTA----- mirR 19 22
-----TAGTGTTCCTACTTTATGGA----- mirR 21 21
-----GTAGTGTTCCTACTTTATGGATGA----- mirR 25 21
-----AGTGTTCCTACTTTATGGATGAG----- mirR 24 19
-----TAGTGTTCCTACTTTATGGAT----- mirR 22 13
-----GTAGTGTTCCTACTTTA----- mirR 18 10
-----GTGTTTCCTACTTTATGGATG----- mirR 21 7
-----GTGTTTCCTACTTTATGGA----- mirR 19 6
-----GTGTTTCCTACTTTATGGATGA----- mirR 22 6
-----GTGTAGTGTTCCTACTTTATGGA----- mirR 24 6
-----TAGTGTTCCTACTTTATGGATG----- mirR 23 6
-----TAGTGTTCCTACTTTATGG----- mirR 20 5
-----TAGTGTTCCTACTTTATGGATGA----- mirR 24 4
-----TAGTGTTCCTACTTTATG----- mirR 19 4
-----AGTGTTCCTACTTTATGGATGAGT----- mirR 25 4
-----AGTGTTCCTACTTTATGGA----- mirR 20 3
-----AGTGTTCCTACTTTATGGATGAGTG----- mirR 26 3
-----GTGTTTCCTACTTTATGG----- mirR 18 2
-----GTGTAGTGTTCCTACTTTATG----- mirR 22 1
-----TGAGTGCACGTGGGCTTCGGAGACCACGCCAC morR 33 4
-----ATGAGTGCACGTGGGCTT----- morR 19 1
-----GAGTGCACGTGGGCTTC----- morR 18 1
-----TGAGTGCACGTGGGCTTCGGAGACCA----- morR 27 1
-----GGATGAGTGCACGTGGG----- morR 18 1
-----GAGTGCACGTGGGCTTCGGAGACCA----- morR 26 1
-----TGAGTGCACGTGGGCTTCGGAGACC----- morR 26 1
-----TGAGTGCACGTGGGCTTCGGAGACCAGCC-- morR 31 1
-----TGAGTGCACGTGGGCTTCG----- morR 20 1

```

>mmu-mir-154

```

ACCCACGTGCGGTGCTTGAAGATAGGTTATCCGTGTTGCCTTCGCTTTATTCGTGACGAATCATAACGGTTGACCTATTTTTTCAGTACCAAATCCCGCCT species len reads
-CCCACGTGCGGTGCTTGAAGA----- morL 21 20
--CCACGTGCGGTGCTTGAAGA----- morL 20 11
---CACGTGCGGTGCTTGAAGA----- morL 19 6
----ACGTGCGGTGCTTGAAGATA----- morL 20 5
--CCACGTGCGGTGCTTGAAG----- morL 19 4

```



```

ACCCACGTGCGGTGCTTGAAGA----- morL 22 3
----ACGTGCGGTGCTTGAAGA----- morL 18 2
----ACGTGCGGTGCTTGAAGAT----- morL 19 1
-CCCACGTGCGGTGCTTGA------ morL 19 1
-CCCACGTGCGGTGCTTGAAGATAG----- morL 24 1
-----TAGGTTATCCGTGTTGCCTTCG----- mirL 22 8454
-----TAGGTTATCCGTGTTGCCTTC----- mirL 21 2018
-----TAGGTTATCCGTGTTGCCTTCGC----- mirL 23 1727
-----TAGGTTATCCGTGTTGCCTT----- mirL 20 1315
-----AGGTTATCCGTGTTGCCTTCG----- mirL 21 458
-----TAGGTTATCCGTGTTGCCTTCGCT----- mirL 24 268
-----AGGTTATCCGTGTTGCCTTC----- mirL 20 133
-----TAGGTTATCCGTGTTGCCT----- mirL 19 124
-----AGGTTATCCGTGTTGCCTTCGC----- mirL 22 103
-----TAGGTTATCCGTGTTGCCTTCGCTT----- mirL 25 78
-----AGGTTATCCGTGTTGCCTT----- mirL 19 73
-----AGGTTATCCGTGTTGCCTTCGCT----- mirL 23 21
-----AGGTTATCCGTGTTGCCT----- mirL 18 8
-----GGTTATCCGTGTTGCCTTCG----- mirL 20 3
-----GTTATCCGTGTTGCCTTCGC----- mirL 20 2
-----GTTATCCGTGTTGCCTTCG----- mirL 19 1
-----ATAGGTTATCCGTGTTGCCTTCG----- mirL 23 1
-----GGTTATCCGTGTTGCCTTC----- mirL 19 1
-----GATAGGTTATCCGTGTTG----- mirL 18 1
-----GGTTATCCGTGTTGCCTTCGC----- mirL 21 1
-----AGGTTATCCGTGTTGCCTTCGCTTT----- mirL 25 1
-----GCTTTATTTCGTGACGAAT----- loop 18 1
-----AATCATAACCGGTTGACCTATT----- mirR 22 32115
-----AATCATAACCGGTTGACCTAT----- mirR 21 2025
-----AATCATAACCGGTTGACCTATTT----- mirR 23 1806
-----AATCATAACCGGTTGACCTA----- mirR 20 400
-----ATCATAACCGGTTGACCTATT----- mirR 21 218
-----AATCATAACCGGTTGACCTATTT----- mirR 24 76
-----AATCATAACCGGTTGACCT----- mirR 19 72
-----CATAACCGGTTGACCTATT----- mirR 19 46
-----AATCATAACCGGTTGACCT----- mirR 18 40
-----GAATCATAACCGGTTGACCTATT----- mirR 23 34
-----TCATAACCGGTTGACCTATT----- mirR 20 19
-----ATCATAACCGGTTGACCTATTT----- mirR 22 18
-----ATCATAACCGGTTGACCTAT----- mirR 20 17
-----ATCATAACCGGTTGACCTATTT----- mirR 23 4
-----CATAACCGGTTGACCTAT----- mirR 18 4
-----ATCATAACCGGTTGACCTA----- mirR 19 2
-----ACGAATCATAACCGGTTGACCT----- mirR 22 1
-----CATAACCGGTTGACCTATTT----- mirR 20 1
-----TCATAACCGGTTGACCTAT----- mirR 19 1

```

```

-----CGAATCATACACGGTTGA----- mirR 18 1
-----ACGAATCATACACGGTTGACCTATT----- mirR 25 1
-----TTTCAGTACCAAATCCCGCCT morR 21 1

```

>mmu-mir-187

| Species | len | reads |
|---------|-----|-------|
| morL    | 18  | 1     |
| morL    | 20  | 1     |
| morL    | 18  | 1     |
| mirL    | 23  | 939   |
| mirL    | 22  | 873   |
| mirL    | 22  | 661   |
| mirL    | 22  | 572   |
| mirL    | 23  | 406   |
| mirL    | 21  | 286   |
| mirL    | 25  | 205   |
| mirL    | 24  | 188   |
| mirL    | 20  | 163   |
| mirL    | 21  | 156   |
| mirL    | 21  | 126   |
| mirL    | 20  | 93    |
| mirL    | 24  | 91    |
| mirL    | 25  | 91    |
| mirL    | 19  | 75    |
| mirL    | 26  | 55    |
| mirL    | 18  | 38    |
| mirL    | 20  | 37    |
| mirL    | 23  | 31    |
| mirL    | 18  | 25    |
| mirL    | 22  | 23    |
| mirL    | 21  | 18    |
| mirL    | 24  | 16    |
| mirL    | 21  | 13    |
| mirL    | 18  | 8     |
| mirL    | 23  | 5     |
| mirL    | 20  | 4     |
| mirL    | 20  | 4     |
| mirL    | 24  | 3     |
| mirL    | 23  | 3     |
| mirL    | 20  | 3     |
| mirL    | 25  | 3     |
| mirL    | 22  | 2     |
| mirL    | 19  | 2     |
| mirL    | 19  | 1     |
| mirL    | 24  | 1     |
| mirL    | 20  | 1     |

```

-----CGCTGCTCTGACCCCTCG----- loop 18 1
-----TCGTGTCTTGTGTTGCAGCCGG----- mirR 22 17605
-----TCGTGTCTTGTGTTGCAGCCGGA----- mirR 23 7601
-----TCGTGTCTTGTGTTGCAGCCG----- mirR 21 5533
-----TCGTGTCTTGTGTTGCAGCCGGAG----- mirR 24 3326
-----TCGTGTCTTGTGTTGCAGCCGGAGG----- mirR 25 1968
-----CTCGTGTCTTGTGTTGCAGCCGG----- mirR 23 1798
-----CTCGTGTCTTGTGTTGCAGCCG----- mirR 22 1564
-----CGTGTCTTGTGTTGCAGCCGGA----- mirR 22 1178
-----TCGTGTCTTGTGTTGCAGCC----- mirR 20 880
-----TCGTGTCTTGTGTTGCAGC----- mirR 19 751
-----CGTGTCTTGTGTTGCAGCCGGAG----- mirR 23 568
-----CGTGTCTTGTGTTGCAGCCGG----- mirR 21 497
-----CTCGTGTCTTGTGTTGCAGC----- mirR 20 397
-----CTCGTGTCTTGTGTTGCAGCCGGA----- mirR 24 352
-----CGTGTCTTGTGTTGCAGCCGGAGG----- mirR 24 240
-----CTCGTGTCTTGTGTTGCAGCCGGAG----- mirR 25 207
-----CTCGTGTCTTGTGTTGCAGCC----- mirR 21 179
-----CGTGTCTTGTGTTGCAGCCG----- mirR 20 105
-----GTGTCTTGTGTTGCAGCCGG----- mirR 20 71
-----CTCGTGTCTTGTGTTGCAGCCGGAGG----- mirR 26 53
-----CGTGTCTTGTGTTGCAGCC----- mirR 19 46
-----CCTCGTGTCTTGTGTTGCAGCCG----- mirR 23 25
-----CGTGTCTTGTGTTGCAGC----- mirR 18 21
-----TGTCTTGTGTTGCAGCCG----- mirR 18 14
-----CCTCGTGTCTTGTGTTGCAGCCGG----- mirR 24 11
-----GTGTCTTGTGTTGCAGCCG----- mirR 19 7
-----TGTCTTGTGTTGCAGCCGGAGG----- mirR 22 6
-----CCCTCGTGTCTTGTGTTG----- mirR 18 4
-----TGTCTTGTGTTGCAGCCGGAGGG----- mirR 23 3
-----TGTCTTGTGTTGCAGCCGGAG----- mirR 21 3
-----GTGTCTTGTGTTGCAGCCGGAG----- mirR 22 3
-----CCTCGTGTCTTGTGTTGCAGC----- mirR 21 2
-----GTGTCTTGTGTTGCAGCCGGA----- mirR 21 2
-----GTGTCTTGTGTTGCAGCC----- mirR 18 2
-----TGTCTTGTGTTGCAGCCGG----- mirR 19 2
-----GTGTCTTGTGTTGCAGCCGGAGG----- mirR 23 2
-----CCTCGTGTCTTGTGTTGC----- mirR 18 1
-----AGGGACGCAGGTCTGCAG morR 18 3
-----GGAGGGACGCAGGTCTGC-- morR 18 1
-----GAGGGACGCAGGTCTGCAG morR 19 1

>mmu-mir-487b
GCCGAGCTTTGGTACTTGGAGAGTGGTTATCCCTGTCTCTTCGCTTCACTCATGCCGAATCGTACAGGGTCATCCACTTTTTTCAGTATCAAGTGCGCAGACTCT species len reads
--CGAGCTTTGGTACTTGGAGA----- morL 20 9
GCCGAGCTTTGGTACTTGGAGAG----- morL 23 1

```

```

-CCGAGCTTTGGTACTTGGAGAG----- morL 22 1
---AGCTTTGGTACTTGGAGA----- morL 18 1
---GAGCTTTGGTACTTGGAG----- morL 18 1
-----GTGGTTATCCCTGTCCTCTTC----- mirL 22 39
-----GTGGTTATCCCTGTCCTCTTC----- mirL 21 11
-----GTGGTTATCCCTGTCCTCTTC----- mirL 20 6
-----TGGTTATCCCTGTCCTCTTC----- mirL 21 3
-----TGGTTATCCCTGTCCTCTTC----- mirL 22 2
-----AGTGGTTATCCCTGTCCT----- mirL 18 1
-----GGTTATCCCTGTCCTCTTC----- mirL 19 1
-----GTTATCCCTGTCCTCTTC----- mirL 18 1
-----GTGGTTATCCCTGTCCTCTTC----- mirL 23 1
-----GTTATCCCTGTCCTCTTC----- mirL 20 1
-----AATCGTACAGGGTCATCCACTT----- mirR 22 23230
-----AATCGTACAGGGTCATCCACT----- mirR 21 9870
-----AATCGTACAGGGTCATCCACTTT----- mirR 23 4408
-----ATCGTACAGGGTCATCCACTTT----- mirR 22 2621
-----ATCGTACAGGGTCATCCACT----- mirR 21 1776
-----ATCGTACAGGGTCATCCACT----- mirR 20 579
-----AATCGTACAGGGTCATCCAC----- mirR 20 463
-----ATCGTACAGGGTCATCCACTTTT----- mirR 23 386
-----AATCGTACAGGGTCATCCACTTTT----- mirR 24 377
-----AATCGTACAGGGTCATCCA----- mirR 19 304
-----TCGTACAGGGTCATCCACT----- mirR 19 170
-----TCGTACAGGGTCATCCACTTT----- mirR 21 142
-----CGTACAGGGTCATCCACT----- mirR 18 119
-----TCGTACAGGGTCATCCACTTTTT----- mirR 23 102
-----TCGTACAGGGTCATCCACTTTT----- mirR 22 99
-----TCGTACAGGGTCATCCACT----- mirR 20 85
-----CGTACAGGGTCATCCACT----- mirR 19 68
-----AATCGTACAGGGTCATCC----- mirR 18 58
-----ATCGTACAGGGTCATCCACTTTTT----- mirR 24 53
-----ATCGTACAGGGTCATCCAC----- mirR 19 39
-----ATCGTACAGGGTCATCCA----- mirR 18 15
-----CGTACAGGGTCATCCACTTT----- mirR 20 14
-----TCGTACAGGGTCATCCACTTTTTTCA----- mirR 25 12
-----TCGTACAGGGTCATCCACTTTTTTC----- mirR 24 5
-----GAATCGTACAGGGTCATCCACTT----- mirR 23 5
-----CGTACAGGGTCATCCACTTTT----- mirR 21 3
-----CGTACAGGGTCATCCACTTTTT----- mirR 22 3
-----GAATCGTACAGGGTCATCCACTTT----- mirR 24 2
-----CGAATCGTACAGGGTCATCCACTTT----- mirR 25 1
-----CGAATCGTACAGGGTCATCCACTT----- mirR 24 1
-----TTTTTCAGTATCAAGTGC----- morR 18 1
-----TTCAGTATCAAGTGCGCA----- morR 18 1
-----TTTCAGTATCAAGTGCGCAGACTCT----- morR 25 1

```

```

>mmu-mir-376c
ATCTTTTGGTATTTAAAAGGTGGATATTCCTTCTATGTTTATGCTTTTTGTGATTAAACATAGAGGAAATTTACAGTTTTTCAGTGTCAAATGCTGCTGGGTAATGGGCC species len reads
-TCCTTTGGTATTTAAAAG----- morL 18 2
ATCTTTTGGTATTTAAA----- morL 18 1
-----GTGGATATTCCTTCTATGTTA----- mirL 22 310
-----GTGGATATTCCTTCTATGTT----- mirL 21 134
-----TGGATATTCCTTCTATGTTA----- mirL 21 47
-----GTGGATATTCCTTCTATGTTTAT----- mirL 23 17
-----GTGGATATTCCTTCTATGTT----- mirL 20 14
-----GGATATTCCTTCTATGTT----- mirL 19 9
-----TGGATATTCCTTCTATGTTTAT----- mirL 22 7
-----GTGGATATTCCTTCTATGT----- mirL 19 5
-----GGATATTCCTTCTATGTTA----- mirL 20 4
-----TGGATATTCCTTCTATGTT----- mirL 20 4
-----TGGATATTCCTTCTATGTTTATGC----- mirL 24 4
-----GTGGATATTCCTTCTATGTTTATG----- mirL 24 3
-----GGTGGATATTCCTTCTATGTT----- mirL 22 2
-----GGTGGATATTCCTTCTATGTTA----- mirL 23 2
-----GATATTCCTTCTATGTTA----- mirL 19 1
-----TGGATATTCCTTCTATGT----- mirL 18 1
-----GTGGATATTCCTTCTATGTTTATGCT----- mirL 26 1
-----GGTGGATATTCCTTCTATGT----- mirL 20 1
-----AACATAGAGGAAATTTACAGT----- mirR 21 37510
-----AACATAGAGGAAATTTACAGTT----- mirR 22 3459
-----AACATAGAGGAAATTTACAG----- mirR 20 1846
-----AACATAGAGGAAATTTACAGTTT----- mirR 23 507
-----AACATAGAGGAAATTTCA----- mirR 18 209
-----AACATAGAGGAAATTTCAC----- mirR 19 185
-----ACATAGAGGAAATTTACAGTTT----- mirR 22 140
-----ACATAGAGGAAATTTACAGT----- mirR 20 109
-----AAACATAGAGGAAATTTACAGT----- mirR 22 83
-----ACATAGAGGAAATTTACAG----- mirR 19 72
-----ACATAGAGGAAATTTACAGTT----- mirR 21 67
-----CATAGAGGAAATTTACAG----- mirR 18 38
-----CATAGAGGAAATTTACAGT----- mirR 19 23
-----TAAACATAGAGGAAATTTACAG----- mirR 22 20
-----AACATAGAGGAAATTTACAGTTT----- mirR 24 19
-----CATAGAGGAAATTTACAGTTT----- mirR 21 12
-----ACATAGAGGAAATTTACAGTTT----- mirR 23 8
-----AAACATAGAGGAAATTTACAGTT----- mirR 23 7
-----CATAGAGGAAATTTACAGTTT----- mirR 22 5
-----AAACATAGAGGAAATTTACAG----- mirR 21 4
-----AAACATAGAGGAAATTTCA----- mirR 19 4
-----ACATAGAGGAAATTTCAC----- mirR 18 4
-----TAAACATAGAGGAAATTTCA----- mirR 20 2

```

```
-----ATAGAGGAAATTTACAGT----- mirR 18 2
-----TAAACATAGAGGAAATTTAC----- mirR 21 1
-----TTTCAGTGTCAAATGCTGCTGGGTAATGGGCC morR 32 1

>mmu-mir-339
GAGCTGGACGGGGTGGCCACTATCCCTGTCTCCAGGAGCTCACGTATGCCTGCCTGTGAGCGCCTCGGCGACAGAGCCGGTGTCCACCCTGCACTGTCCA species len reads
---CTGGACGGGGTGGCCACT----- morL 18 7
---CTGGACGGGGTGGCCACT----- morL 19 3
--GCTGGACGGGGTGGCCACT----- morL 20 2
-AGCTGGACGGGGTGGCCACT----- morL 21 2
GAGCTGGACGGGGTGGCCACT----- morL 22 1
-----ACGGGGTGGCCACTATCC----- morL 18 1
-----GACGGGGTGGCCACTATCC----- morL 19 1
--GCTGGACGGGGTGGCCAC----- morL 18 1
-----TCCCTGTCTCCAGGAGCTCA----- mirL 21 14263
-----TCCCTGTCTCCAGGAGCTCACG----- mirL 23 11773
-----TCCCTGTCTCCAGGAGCTCACGT----- mirL 24 5300
-----TCCCTGTCTCCAGGAGCTCAC----- mirL 22 4938
-----TCCCTGTCTCCAGGAGCTC----- mirL 20 3097
-----TCCCTGTCTCCAGGAGCT----- mirL 19 982
-----TCCCTGTCTCCAGGAGCTCACGTA----- mirL 25 780
-----CCCTGTCTCCAGGAGCTCA----- mirL 20 251
-----CCCTGTCTCCAGGAGCTCACG----- mirL 22 155
-----CCCTGTCTCCAGGAGCTCAC----- mirL 21 125
-----CCCTGTCTCCAGGAGCTC----- mirL 19 77
-----ATCCCTGTCTCCAGGAGCTCA----- mirL 22 77
-----CCCTGTCTCCAGGAGCTCACGT----- mirL 23 72
-----CCCTGTCTCCAGGAGCT----- mirL 18 35
-----ATCCCTGTCTCCAGGAGCTCAC----- mirL 23 33
-----CCCTGTCTCCAGGAGCTCACGTAT----- mirL 25 20
-----CTGTCTCCAGGAGCTCACG----- mirL 20 19
-----CTGTCTCCAGGAGCTCA----- mirL 18 16
-----ATCCCTGTCTCCAGGAGCTC----- mirL 21 15
-----CCTGTCTCCAGGAGCTCACG----- mirL 21 11
-----CCTGTCTCCAGGAGCTCA----- mirL 19 9
-----ATCCCTGTCTCCAGGAGCTCACG----- mirL 24 7
-----ATCCCTGTCTCCAGGAGCT----- mirL 20 2
-----TATCCCTGTCTCCAGGAGCTCAC----- mirL 24 1
-----ATCCCTGTCTCCAGGAG----- mirL 18 1
-----ATCCCTGTCTCCAGGAGCTCACGTA----- mirL 26 1
-----CTGTCTCCAGGAGCTCAC----- mirL 19 1
-----CTATCCCTGTCTCCAGG----- mirL 18 1
-----TATCCCTGTCTCCAGGAGCTCACGT----- mirL 26 1
-----CCTGTCTCCAGGAGCTCAC----- mirL 20 1
-----CTGTCTCCAGGAGCTCACGT----- mirL 21 1
-----CCTGTCTCCAGGAGCTC----- mirL 18 1
```

```

-----TGAGCGCCTCGGCGACAGAGCCG----- mirR 23 1128
-----TGAGCGCCTCGGCGACAGAGCC----- mirR 22 229
-----AGCGCCTCGGCGACAGAGCCG----- mirR 21 92
-----TGAGCGCCTCGGCGACAGAGC----- mirR 21 72
-----AGCGCCTCGGCGACAGAGCC----- mirR 20 63
-----TGAGCGCCTCGGCGACAGAG----- mirR 20 59
-----TGAGCGCCTCGGCGACAGAGCCGG----- mirR 24 43
-----GAGCGCCTCGGCGACAGAGCCG----- mirR 22 35
-----GCGCCTCGGCGACAGAGCCG----- mirR 20 32
-----TGAGCGCCTCGGCGACAGAGCCGGT----- mirR 25 31
-----AGCGCCTCGGCGACAGAGCCGG----- mirR 22 29
-----AGCGCCTCGGCGACAGAGCCGGT----- mirR 23 27
-----TGAGCGCCTCGGCGACAGAGCCGGTG----- mirR 26 14
-----GAGCGCCTCGGCGACAGAGCCGG----- mirR 23 11
-----GAGCGCCTCGGCGACAGAG----- mirR 19 7
-----AGCGCCTCGGCGACAGAGC----- mirR 19 7
-----GAGCGCCTCGGCGACAGAGCC----- mirR 21 5
-----GAGCGCCTCGGCGACAGAGC----- mirR 20 4
-----AGCGCCTCGGCGACAGAG----- mirR 18 4
-----GAGCGCCTCGGCGACAGAGCCGGT----- mirR 24 3
-----GAGCGCCTCGGCGACAGA----- mirR 18 2
-----AGCGCCTCGGCGACAGAGCCGGTG----- mirR 24 1
-----GTGAGCGCCTCGGCGACAGAGCCG----- mirR 24 1
-----GCGCCTCGGCGACAGAGC----- mirR 18 1
-----GTGTCCACCCTGCACTGTCC----- morR 21 1
-----TCCACCCTGCACTGTCCA morR 19 1

```

>mmu-mir-299

```

TCACGCGGTACTTGAAGAAATGGTTTACCGTCCCACATACATTTTGAGTATGTATGTGGGACGGTAAACCGCTTCTTGGTATCCAGCCCAGCCAT species len reads
TCACGCGGTACTTGAAGAAA----- morL 20 5
---CGCGGTACTTGAAGAAATG----- morL 19 1
-----TGGTTTACCGTCCCACATACAT----- mirL 22 20895
-----TGGTTTACCGTCCCACATACA----- mirL 21 4411
-----TGGTTTACCGTCCCACATAC----- mirL 20 2421
-----ATGGTTTACCGTCCCACATACA----- mirL 22 2213
-----TGGTTTACCGTCCCACATACATT----- mirL 23 1694
-----ATGGTTTACCGTCCCACATAC----- mirL 21 904
-----GGTTTACCGTCCCACATACAT----- mirL 21 738
-----TGGTTTACCGTCCCACAT----- mirL 18 704
-----TGGTTTACCGTCCCACATA----- mirL 19 704
-----TGGTTTACCGTCCCACATACATTT----- mirL 24 604
-----GGTTTACCGTCCCACATACA----- mirL 20 269
-----GGTTTACCGTCCCACATAC----- mirL 19 160
-----ATGGTTTACCGTCCCACATA----- mirL 20 107
-----ATGGTTTACCGTCCCACATACAT----- mirL 23 95
-----ATGGTTTACCGTCCCACAT----- mirL 19 73

```

```
-----AATGGTTTACCGTCCCACATAC----- mirL 22 69
-----GGTTTACCGTCCCACATACATT----- mirL 22 42
-----GGTTTACCGTCCCACATA----- mirL 18 42
-----AATGGTTTACCGTCCCACATACA----- mirL 23 40
-----GTTTACCGTCCCACATACAT----- mirL 20 32
-----TTTACCGTCCCACATACAT----- mirL 19 29
-----ATGGTTTACCGTCCCACA----- mirL 18 26
-----GTTTACCGTCCCACATACA----- mirL 19 22
-----AATGGTTTACCGTCCCACAT----- mirL 20 18
-----TTTACCGTCCCACATACATTT----- mirL 22 14
-----ATGGTTTACCGTCCCACATACATT----- mirL 24 11
-----GGTTTACCGTCCCACATACATT----- mirL 23 8
-----TTTACCGTCCCACATACA----- mirL 18 5
-----AATGGTTTACCGTCCCACATA----- mirL 21 4
-----AATGGTTTACCGTCCCACA----- mirL 19 4
-----GGTTTACCGTCCCACATACATTT----- mirL 24 3
-----AATGGTTTACCGTCCCAC----- mirL 18 1
-----GTTTACCGTCCCACATAC----- mirL 18 1
-----TTTACCGTCCCACATACATTT----- mirL 21 1
-----TATGTGGGACGGTAAACCGCT----- mirR 22 2002
-----GTATGTGGGACGGTAAACCGCT----- mirR 22 1797
-----TATGTGGGACGGTAAACCGCT----- mirR 21 1066
-----TATGTGGGACGGTAAACCGCTTC----- mirR 23 543
-----TATGTGGGACGGTAAACCGCTTCT----- mirR 24 297
-----GTATGTGGGACGGTAAACCGCT----- mirR 23 239
-----ATGTGGGACGGTAAACCGCT----- mirR 21 196
-----GTATGTGGGACGGTAAACCGC----- mirR 21 188
-----ATGTGGGACGGTAAACCGCT----- mirR 20 101
-----TATGTGGGACGGTAAACCGC----- mirR 20 93
-----ATGTGGGACGGTAAACCGCTTC----- mirR 22 88
-----ATGTGGGACGGTAAACCGCTTCT----- mirR 23 48
-----GTATGTGGGACGGTAAACCGCTTC----- mirR 24 44
-----GTATGTGGGACGGTAAAC----- mirR 18 37
-----GTATGTGGGACGGTAAACCG----- mirR 20 28
-----TATGTGGGACGGTAAACCGCTTCT----- mirR 25 19
-----TGTATGTGGGACGGTAAACCGCT----- mirR 23 16
-----TATGTGGGACGGTAAACCG----- mirR 19 16
-----GTATGTGGGACGGTAAACCGCTTCT----- mirR 25 15
-----GTGGGACGGTAAACCGCT----- mirR 19 10
-----TGTGGGACGGTAAACCGCT----- mirR 20 7
-----GTGGGACGGTAAACCGCT----- mirR 18 5
-----TGTGGGACGGTAAACCGCTTCT----- mirR 22 5
-----TGTATGTGGGACGGTAAACCGC----- mirR 22 4
-----ATGTGGGACGGTAAACCGC----- mirR 19 3
-----TGTGGGACGGTAAACCGCTTC----- mirR 21 2
-----TGTATGTGGGACGGTAAACCGCT----- mirR 24 2
```



```

-----TGTGGGACGGTAAACCGCT----- mirR 19 2
-----ATGTATGTGGGACGGTAA----- mirR 18 1
-----ATGTGGGACGGTAAACCG----- mirR 18 1
-----TGTATGTGGGACGGTAAACCG----- mirR 21 1
-----GTGGGACGGTAAACCGCTTC----- mirR 20 1
-----ATGTGGGACGGTAAACCGCTTCTT----- mirR 24 1
-----TTCTTGGTATCCAGCCCA----- morR 18 4
-----CTTCTTGGTATCCAGCCC----- morR 18 2
-----GGTATCCAGCCCAGCCAT morR 18 1
-----TTCTTGGTATCCAGCCCAGCCA- morR 22 1

>mmu-mir-324
CCAGAAGAGAAGTACTATGCCTCCTCGCATCCCCTAGGGCATTGGTGTAAAGCTGGAGACCCACTGCCCCAGGTGCTGCTGGGGGTTGTAGTCTGACCCAAGTGT species len reads
-----GAGAAGTACTATGCCTCCT----- morL 20 130
-----GAACTGACTATGCCTCCT----- morL 18 76
-----AGAAGTACTATGCCTCCT----- morL 19 50
-----AGAGAAGTACTATGCCTCCT----- morL 21 26
-----AAGAGAAGTACTATGCCTCCT----- morL 22 21
-----GAGAAGTACTATGCCTCCTC----- morL 21 8
-----GAGAAGTACTATGCCTCCT----- morL 19 7
-----GAACTGACTATGCCTCCTC----- morL 19 6
-----AGAGAAGTACTATGCCTCCT----- morL 20 3
-----AGAAGTACTATGCCTCCTC----- morL 20 3
-----CTGACTATGCCTCCTCGC----- morL 18 2
-----AGAGAAGTACTATGCCTCCTC----- morL 22 2
-----GAGAAGTACTATGCCTCCTCG----- morL 22 2
-----GAGAAGTACTATGCCTCCT----- morL 18 2
-----AGAGAAGTACTATGCCTCCTCG----- morL 23 2
-----AGAAGTACTATGCCTCCT----- morL 18 2
CCAGAAGAGAAGTACTATGCCTCCT----- morL 26 1
-----ACTGACTATGCCTCCTCG----- morL 18 1
-----AAGAGAAGTACTATGCCTCCT----- morL 21 1
-----AGAAGAGAAGTACTATGCCTCCT----- morL 24 1
-----GAAGAGAAGTACTATGCCTCCTC----- morL 24 1
-----CGCATCCCCTAGGGCATTGGTGT----- mirL 23 17396
-----CGCATCCCCTAGGGCATTGG----- mirL 20 4430
-----CGCATCCCCTAGGGCATTGGTG----- mirL 22 4288
-----CGCATCCCCTAGGGCATTGGT----- mirL 21 2548
-----CGCATCCCCTAGGGCATTGGTGTA----- mirL 24 1776
-----CGCATCCCCTAGGGCATTGGTGTA----- mirL 25 970
-----CGCATCCCCTAGGGCATTG----- mirL 19 958
-----CATCCCCTAGGGCATTGG----- mirL 18 44
-----GCATCCCCTAGGGCATTGG----- mirL 19 33
-----GCATCCCCTAGGGCATTGGTG----- mirL 21 22
-----CATCCCCTAGGGCATTGGTG----- mirL 20 20
-----TCGCATCCCCTAGGGCATTGGTG----- mirL 23 10

```

```

-----ATCCCCTAGGGCATTGGT----- mirL 19 9
-----TCGCATCCCCTAGGGCATTGG----- mirL 21 7
-----GCATCCCCTAGGGCATTGGT----- mirL 22 6
-----TCGCATCCCCTAGGGCATTGGT----- mirL 22 5
-----ATCCCCTAGGGCATTGGT----- mirL 18 4
-----GCATCCCCTAGGGCATTG----- mirL 18 3
-----TCGCATCCCCTAGGGCATTG----- mirL 20 3
-----GCATCCCCTAGGGCATTGGT----- mirL 20 3
-----GCATCCCCTAGGGCATTGGTGTA----- mirL 23 2
-----CATCCCCTAGGGCATTGGTGTA----- mirL 22 1
-----CCTCGCATCCCCTAGGGC----- mirL 18 1
-----TCGCATCCCCTAGGGCATT----- mirL 19 1
-----CTCGCATCCCCTAGGGCA----- mirL 18 1
-----ATCCCCTAGGGCATTGGTGT----- mirL 20 1
-----TGAAAGCTGGAGACCCA----- loop 18 4
-----TGAAAGCTGGAGACCCAC----- loop 19 1
-----ACTGCCCCAGGTGCTGCTGGG----- mirR 21 2615
-----ACTGCCCCAGGTGCTGCTGGGG----- mirR 22 2305
-----ACTGCCCCAGGTGCTGCTGGGGG----- mirR 23 960
-----CCACTGCCCCAGGTGCTGCTGG----- mirR 22 781
-----CCACTGCCCCAGGTGCTGCTGGG----- mirR 23 753
-----CCACTGCCCCAGGTGCTGCTG----- mirR 21 530
-----ACTGCCCCAGGTGCTGCTGGGGT----- mirR 24 428
-----ACTGCCCCAGGTGCTGCTGG----- mirR 20 366
-----CCACTGCCCCAGGTGCTGCT----- mirR 20 355
-----CCACTGCCCCAGGTGCTGCTGGGG----- mirR 24 327
-----ACTGCCCCAGGTGCTGCTG----- mirR 19 201
-----CCACTGCCCCAGGTGCTGCTGGGG----- mirR 25 161
-----CCACTGCCCCAGGTGCTGCTGGGGT----- mirR 26 75
-----ACTGCCCCAGGTGCTGCT----- mirR 18 52
-----CTGCCCCAGGTGCTGCTGGGG----- mirR 22 14
-----CACTGCCCCAGGTGCTGCTGG----- mirR 22 13
-----CTGCCCCAGGTGCTGCTGGGGT----- mirR 23 12
-----CTGCCCCAGGTGCTGCTGGG----- mirR 20 12
-----CTGCCCCAGGTGCTGCTGGGG----- mirR 21 10
-----CACTGCCCCAGGTGCTGCTGG----- mirR 21 8
-----CACTGCCCCAGGTGCTGCTGGGG----- mirR 23 7
-----CACTGCCCCAGGTGCTGCTGGGGG----- mirR 24 4
-----CACTGCCCCAGGTGCTGCTG----- mirR 20 4
-----CCCACTGCCCCAGGTGCTGCTGGGG----- mirR 25 2
-----CTGCCCCAGGTGCTGCTGGGGGTT----- mirR 24 2
-----CTGCCCCAGGTGCTGCTGG----- mirR 19 2
-----CACTGCCCCAGGTGCTGCTGGGGT----- mirR 25 2
-----TGCCCCAGGTGCTGCTGG----- mirR 18 1
-----CCCACTGCCCCAGGTGCTGCTGG----- mirR 23 1
-----CCCACTGCCCCAGGTGCTGCTG----- mirR 22 1

```

```

-----CCCACTGCCCCAGGTGCTGC----- mirR 20 1
-----GCCCCAGGTGCTGCTGGGG----- mirR 20 1
-----CACTGCCCCAGGTGCTGCT----- mirR 19 1
-----GCCCCAGGTGCTGCTGGG----- mirR 18 1
-----GGGGTTGTAGTCTGACCC----- morR 18 62
-----GGGGTTGTAGTCTGACCCA----- morR 19 5
-----GTTGTAGTCTGACCCAAGTGT morR 21 1
-----GGGGTTGTAGTCTGACC----- morR 18 1
-----GGGTGTAGTCTGACCCA----- morR 18 1

>mmu-mir-350
ATAGATGCCTTGCTCCTACAAGAGTAAAGTGCATGCGCTTTGGGACAGTGAGGAAAATAATGTTTCACAAAGCCATACACTTTACCCCTTAGGAGAGTTGCAGCT species len reads
ATAGATGCCTTGCTCCTACAAG----- morL 22 1
-----TGCCTTGCTCCTACAAGA----- morL 18 1
-----TGCCTTGCTCCTACAAGAGT----- morL 20 1
-----ATGCCTTGCTCCTACAAGA----- morL 19 1
-----AAAGTGCATGCGCTTTGGGA----- mirL 20 17
-----AAAGTGCATGCGCTTTGGGACAGT----- mirL 24 5
-----AAGTGCATGCGCTTTGGG----- mirL 18 4
-----AAAGTGCATGCGCTTTGGGACAG----- mirL 23 4
-----AAAGTGCATGCGCTTTGGGACA----- mirL 22 2
-----TAAAGTGCATGCGCTTTG----- mirL 18 2
-----AAAGTGCATGCGCTTTGG----- mirL 18 1
-----AAGTGCATGCGCTTTGGGA----- mirL 19 1
-----AGTAAAGTGCATGCGCTT----- mirL 18 1
-----GTGAGGAAAATAATGTTTC----- loop 18 3
-----TTCACAAAGCCATACACTTTTCA----- mirR 23 17203
-----TTCACAAAGCCATACACTTTTCA----- mirR 24 11618
-----TTCACAAAGCCATACACTTTTCA----- mirR 22 5666
-----TTCACAAAGCCATACACTTT----- mirR 21 1923
-----TTCACAAAGCCATACACTTTTCA----- mirR 25 1794
-----TCACAAAGCCATACACTTTTCA----- mirR 22 1679
-----TCACAAAGCCATACACTTTTCA----- mirR 23 992
-----TCACAAAGCCATACACTTTT----- mirR 21 480
-----TTCACAAAGCCATACACTTT----- mirR 20 328
-----TCACAAAGCCATACACTTT----- mirR 20 222
-----TTCACAAAGCCATACACTTTTCA----- mirR 26 209
-----TCACAAAGCCATACACTTTTCA----- mirR 24 91
-----TCACAAAGCCATACACTTT----- mirR 19 35
-----TCACAAAGCCATACACT----- mirR 18 23
-----CACAAAGCCATACACTTTTCA----- mirR 21 22
-----ACAAAGCCATACACTTTTCA----- mirR 21 22
-----CACAAAGCCATACACTTTT----- mirR 20 22
-----CACAAAGCCATACACTTTTCA----- mirR 22 21
-----GTTTCACAAAGCCATACACTTTTCA----- mirR 24 8
-----ACAAAGCCATACACTTTTCA----- mirR 20 7

```

```

-----G TTCACAAAGCCCATACTTTTCAC----- mirR 25 7
-----ACAAAGCCCATACTTTTCACC----- mirR 22 5
-----G TTCACAAAGCCCATACTTTTCAC----- mirR 21 4
-----ACAAAGCCCATACTTTTC----- mirR 19 4
-----ACAAAGCCCATACTTTTCACCCT----- mirR 24 3
-----CACAAAGCCCATACTTTTCACC----- mirR 23 3
-----ACAAAGCCCATACTTTTCACC----- mirR 23 3
-----CACAAAGCCCATACTTTTC----- mirR 19 2
-----G TTCACAAAGCCCATACTTTTCACC----- mirR 26 1
-----G TTCACAAAGCCCATACTTTTC----- mirR 22 1
-----G TTCACAAAGCCCATACTTTTC----- mirR 23 1
-----ATG TTCACAAAGCCCATA----- mirR 18 1
-----ACCCTTTAGGAGAGTTGCA--- morR 19 12
-----CCTTTAGGAGAGTTGCAG-- morR 18 2
-----CACCTTTAGGAGAGTTG---- morR 18 2
-----CCTTTAGGAGAGTTGCAGCT morR 20 2
-----TTTAGGAGAGTTGCAGCT morR 18 1

>mmu-let-7e
TGCCACCTGCCGCGCCCCCGGGCTGAGGTAGGAGGTTGTATAGTTGAGGAAGACACCCGAGGAGATCACTATACGGCTCCTAGCTTTCCCCAGGCTGCGCCCTGCACTGG species len reads
-----CTGCCGCGCCCCCGGGC----- morL 18 52
-----CCTGCCGCGCCCCCGGGC----- morL 19 49
-----ACCTGCCGCGCCCCCGGGC----- morL 20 15
TGCCACCTGCCGCGCCCCCGGGC----- morL 25 12
-----CTGCCGCGCCCCCGGGCT----- morL 19 11
-----CCTGCCGCGCCCCCGGGCT----- morL 20 5
-----CCTGCCGCGCCCCCGGG----- morL 18 4
-GCCACCTGCCGCGCCCCCGGGC----- morL 24 4
-----TGCCGCGCCCCCGGGCT----- morL 18 3
-----ACCTGCCGCGCCCCCGGGCT----- morL 21 3
-----CACCTGCCGCGCCCCCGGGC----- morL 21 2
-----ACCTGCCGCGCCCCCGGG----- morL 19 1
-----ACCTGCCGCGCCCCCGG----- morL 18 1
-----CCCACCTGCCGCGCCCCCGGGC----- morL 23 1
-----CCGCGCCCCCGGGCTGA----- morL 18 1
-----CTGCCGCGCCCCCGGGCTG----- morL 20 1
-----CACCTGCCGCGCCCCCGG----- morL 19 1
-----CCACCTGCCGCGCCCCCGGGCT----- morL 23 1
-----CACCTGCCGCGCCCCCG----- morL 18 1
-----TGAGGTAGGAGGTTGTATAGTT----- mirL 22 12571
-----TGAGGTAGGAGGTTGTATAGTTG----- mirL 23 8998
-----TGAGGTAGGAGGTTGTATAGTTGA----- mirL 24 4444
-----TGAGGTAGGAGGTTGTATAGT----- mirL 21 3114
-----TGAGGTAGGAGGTTGTATAG----- mirL 20 2988
-----GAGGTAGGAGGTTGTATAGTT----- mirL 21 792
-----TGAGGTAGGAGGTTGTATAGTTGAG----- mirL 25 652

```

```

-----TGAGGTAGGAGGTTGTATA----- mirL 19 627
-----GAGGTAGGAGGTTGTATAGTTG----- mirL 22 583
-----GAGGTAGGAGGTTGTATAGTTGA----- mirL 23 280
-----GAGGTAGGAGGTTGTATAGT----- mirL 20 172
-----GAGGTAGGAGGTTGTATAG----- mirL 19 147
-----GAGGTAGGAGGTTGTATA----- mirL 18 33
-----GAGGTAGGAGGTTGTATAGTTGAG----- mirL 24 32
-----GGTAGGAGGTTGTATAGTTG----- mirL 20 4
-----AGGTAGGAGGTTGTATAGTTGA----- mirL 22 2
-----AGGTAGGAGGTTGTATAGTTG----- mirL 21 2
-----CTGAGGTAGGAGGTTGTATAGTT----- mirL 23 2
-----GGTAGGAGGTTGTATAGTTGA----- mirL 21 2
-----CTGAGGTAGGAGGTTGTATAGTTG----- mirL 24 1
-----CTGAGGTAGGAGGTTGTATAG----- mirL 21 1
-----CTGAGGTAGGAGGTTGTATAGT----- mirL 22 1
-----CTGAGGTAGGAGGTTGTAT----- mirL 19 1
-----GGTAGGAGGTTGTATAGTT----- mirL 19 1
-----GGTAGGAGGTTGTATAGT----- mirL 18 1
-----CTGAGGTAGGAGGTTGTATAGTTGA----- mirL 25 1
-----GGCTGAGGTAGGAGGTTGTATAGTTGA----- mirL 27 1
-----AGGTAGGAGGTTGTATAG----- mirL 18 1
-----CTGAGGTAGGAGGTTGTA----- mirL 18 1
-----GAGGAAGACACCCGAGGAGATCA----- loop 23 485
-----AGGAAGACACCCGAGGAGATCA----- loop 22 52
-----GAGGAAGACACCCGAGGAGATC----- loop 22 37
-----GAGGAAGACACCCGAGGAGATCAC----- loop 24 29
-----GGAAGACACCCGAGGAGATCA----- loop 21 7
-----GAGGAAGACACCCGAGGAGAT----- loop 21 2
-----AGGAAGACACCCGAGGAGAT----- loop 20 2
-----AGGAAGACACCCGAGGAGATCAC----- loop 23 1
-----GAAGACACCCGAGGAGATCA----- loop 20 1
-----TGAGGAAGACACCCGAGGAGATCACT----- loop 26 1
-----CTATACGGCCTCCTAGCTTTCC----- mirR 22 4108
-----CTATACGGCCTCCTAGCTTTTC----- mirR 21 701
-----CTATACGGCCTCCTAGCTTTCCC----- mirR 23 500
-----CTATACGGCCTCCTAGCTTT----- mirR 20 114
-----CTATACGGCCTCCTAGCTTTCCCC----- mirR 24 47
-----TATACGGCCTCCTAGCTTTCC----- mirR 21 45
-----TATACGGCCTCCTAGCTTTCCC----- mirR 22 36
-----ACTATACGGCCTCCTAGCTTTCC----- mirR 23 27
-----ACTATACGGCCTCCTAGCTTTTC----- mirR 22 24
-----CACTATACGGCCTCCTAGCTTTTC----- mirR 23 17
-----CTATACGGCCTCCTAGCTTTCCCCA----- mirR 25 16
-----TCACTATACGGCCTCCTAGCTTTTC----- mirR 24 15
-----CTATACGGCCTCCTAGCTTT----- mirR 19 14
-----TATACGGCCTCCTAGCTTTCC----- mirR 20 12

```

```

-----TACGGCCTCCTAGCTTTCC----- mirR 19 6
-----CACTATACGGCCTCCTAGCTTTCC----- mirR 24 6
-----TCACTATACGGCCTCCTAGCTTTCC----- mirR 25 5
-----ATACGGCCTCCTAGCTTTCCC----- mirR 21 4
-----ATACGGCCTCCTAGCTTTCC----- mirR 20 4
-----TCACTATACGGCCTCCTAGCTTTCCC----- mirR 26 3
-----CACTATACGGCCTCCTAGCTT----- mirR 21 3
-----CACTATACGGCCTCCTAGCTTTCCC----- mirR 25 3
-----ACTATACGGCCTCCTAGCTT----- mirR 20 2
-----TATACGGCCTCCTAGCTTTCCC----- mirR 23 2
-----CACTATACGGCCTCCTAGCTTT----- mirR 22 2
-----TCACTATACGGCCTCCTAGCTTT----- mirR 23 2
-----TATACGGCCTCCTAGCTTT----- mirR 19 2
-----ATACGGCCTCCTAGCTTTCCC----- mirR 22 2
-----CCAGGCTGCGCCCTGCACTGG morR 21 4
-----TCCCCAGGCTGCGCCCTGC----- morR 19 2
-----CCAGGCTGCGCCCTGCACTG- morR 20 2
-----CCAGGCTGCGCCCTGCACT-- morR 19 1
-----AGGCTGCGCCCTGCACTG- morR 18 1

```

>mmu-mir-376b

```

AGTCCTTCTTTGGTATTTAAAAGGTGGATATCCTTCTATGGTTACGTCTTCCGGATAATCATAGAGGAACATCCACTTTTTTCAGTATCAAATGTCGCTCTGGAACATTTTC species len reads
---CTTCTTTGGTATTTAAAAG----- morL 19 8
---CCTTCTTTGGTATTTAAAAG----- morL 20 8
AGTCCTTCTTTGGTATTTAAAAG----- morL 23 7
---CCTTCTTTGGTATTTAAAAG----- morL 19 1
-----GTGGATATCCTTCTATGGTTA----- mirL 22 4698
-----GTGGATATCCTTCTATGGTT----- mirL 21 4206
-----TGGATATCCTTCTATGGTTA----- mirL 21 520
-----GTGGATATCCTTCTATGGTTAC----- mirL 23 300
-----TGGATATCCTTCTATGGTTACG----- mirL 23 279
-----GTGGATATCCTTCTATGGT----- mirL 20 257
-----GGTGGATATCCTTCTATGGTTA----- mirL 23 215
-----GGTGGATATCCTTCTATGGTT----- mirL 22 196
-----GTGGATATCCTTCTATGG----- mirL 19 103
-----TGGATATCCTTCTATGGTT----- mirL 20 89
-----GGTGGATATCCTTCTATGGT----- mirL 21 41
-----GGATATCCTTCTATGGTTA----- mirL 20 41
-----TGGATATCCTTCTATGGTTAC----- mirL 22 32
-----GTGGATATCCTTCTATGGTTACG----- mirL 24 31
-----GGATATCCTTCTATGGTT----- mirL 19 20
-----GGTGGATATCCTTCTATGGTTAC----- mirL 24 18
-----TGGATATCCTTCTATGGTTACGTGC----- mirL 26 16
-----TGGATATCCTTCTATGGTTACGT----- mirL 24 15
-----TGGATATCCTTCTATGGT----- mirL 19 10
-----AAGGTGGATATCCTTCTATGGT----- mirL 23 8

```

```

-----GGATATTCCTTCTATGGT----- mirL 18 8
-----GGTGGATATTCCTTCTATGG----- mirL 20 6
-----GTGGATATTCCTTCTATGGTTACGTGCTTC----- mirL 30 6
-----GGATATTCCTTCTATGGTTACG----- mirL 22 6
-----GGATATTCCTTCTATGGTTAC----- mirL 21 4
-----GATATTCCTTCTATGGTT----- mirL 18 4
-----GATATTCCTTCTATGGTTA----- mirL 19 3
-----TACGTGCTTCCTGGATAAT----- loop 19 1
-----ATCATAGAGGAACATCCACTT----- mirR 21 22925
-----ATCATAGAGGAACATCCACTTT----- mirR 22 4009
-----ATCATAGAGGAACATCCACT----- mirR 20 2446
-----ATCATAGAGGAACATCCACTTTT----- mirR 23 386
-----ATCATAGAGGAACATCCAC----- mirR 19 175
-----CATAGAGGAACATCCACTT----- mirR 19 132
-----ATCATAGAGGAACATCCA----- mirR 18 119
-----AATCATAGAGGAACATCCACTT----- mirR 22 93
-----ATCATAGAGGAACATCCACTTTT----- mirR 24 47
-----TCATAGAGGAACATCCACTTTT----- mirR 22 36
-----TCATAGAGGAACATCCACTTT----- mirR 21 35
-----TCATAGAGGAACATCCACT----- mirR 19 32
-----AATCATAGAGGAACATCCACT----- mirR 21 26
-----TCATAGAGGAACATCCACTT----- mirR 20 25
-----CATAGAGGAACATCCACTTT----- mirR 20 24
-----CATAGAGGAACATCCACT----- mirR 18 24
-----ATAGAGGAACATCCACTTT----- mirR 19 19
-----ATAGAGGAACATCCACTT----- mirR 18 12
-----AATCATAGAGGAACATCCACTTT----- mirR 23 8
-----TAATCATAGAGGAACATCCACT----- mirR 22 7
-----TAATCATAGAGGAACATCCACTT----- mirR 23 3
-----ATAGAGGAACATCCACTTTT----- mirR 20 2
-----AATCATAGAGGAACATCCACTTTT----- mirR 25 1
-----AATCATAGAGGAACATCC----- mirR 18 1
-----TCATAGAGGAACATCCACTTTT----- mirR 23 1
-----AATCATAGAGGAACATCCA----- mirR 19 1
-----TAATCATAGAGGAACATC----- mirR 18 1
-----ATAATCATAGAGGAACATCCACTT----- mirR 24 1
-----TCATAGAGGAACATCCAC----- mirR 18 1
-----CATAGAGGAACATCCACTTTT----- mirR 21 1
-----ATAATCATAGAGGAACATC----- mirR 19 1
-----ATAATCATAGAGGAACATCCACT----- mirR 23 1
-----TTTCAGTATCAAATGTCGCTCTG----- morR 23 1
-----TTTCAGTATCAAATGTCGCTCTGGAATTTTC morR 33 1

```

>mmu-mir-615

```

CCAGCGACTCGGGAGGGGCGGGAGGGGGTCCCCGGTCTCGGATCTCGAGGGTGCTTATTGTTCCGGTCCGAGCCTGGGTCTCCCTCTTCCCCCATCCCCCTCAGC species len reads
-----CGACTCGGGAGGGGCGGGAG----- morL 20 43

```

```

---GCGACTCGGGAGGGGCGGGAG----- morL 21 32
---GACTCGGGAGGGGCGGGAG----- morL 19 24
CCAGCGACTCGGGAGGGGCGGGAG----- morL 24 13
-CAGCGACTCGGGAGGGGCGGGAG----- morL 23 9
---TCGGGAGGGGCGGGAGGG----- morL 18 4
---CGACTCGGGAGGGGCGGGAG----- morL 21 2
--AGCGACTCGGGAGGGGCGGGAG----- morL 22 2
---CTCGGGAGGGGCGGGAG----- morL 18 2
---GACTCGGGAGGGGCGGGAG----- morL 20 2
---ACTCGGGAGGGGCGGGAG----- morL 18 2
---GCGACTCGGGAGGGGCGGGAG----- morL 22 1
---CGGGAGGGGCGGGAGGG----- morL 18 1
---CTCGGGAGGGGCGGGAGGG----- morL 19 1
-----GGGGGTCCCCGGTGCTCGGATC----- mirL 22 435
-----GGGGGTCCCCGGTGCTCGGAT----- mirL 21 61
-----GGGTCCCCGGTGCTCGGATC----- mirL 20 42
-----GGGGGTCCCCGGTGCTCGGATCT----- mirL 23 37
-----GGGGTCCCCGGTGCTCGGATC----- mirL 21 37
-----GGTCCCCGGTGCTCGGATC----- mirL 19 29
-----GGGGGTCCCCGGTGCTCGGA----- mirL 20 14
-----GGGGGTCCCCGGTGCTCGGATCTC----- mirL 24 9
-----GGGGGTCCCCGGTGCTCG----- mirL 18 5
-----GGGGTCCCCGGTGCTCGGATCT----- mirL 22 4
-----GGGGGTCCCCGGTGCTCGGATC----- mirL 23 4
-----GGGGTCCCCGGTGCTCGGAT----- mirL 20 3
-----GGGGGTCCCCGGTGCTCGGATCTCG----- mirL 25 3
-----GGGTCCCCGGTGCTCGGATCT----- mirL 21 2
-----GGGTCCCCGGTGCTCGGATCTCGAG----- mirL 25 2
-----GGTCCCCGGTGCTCGGATCTCGA----- mirL 23 1
-----GAGGGGGTCCCCGGTGC----- mirL 18 1
-----TCGAGGGTGCTTATTGTTCCG----- loop 21 8
-----AGGGTGCTTATTGTTCCGTCC----- loop 21 1
-----TCGAGGGTGCTTATTGTTCCGTCC----- loop 24 1
-----CGAGGGTGCTTATTGTTCCG----- loop 20 1
-----TCCGAGCCTGGGTCTCCCTCT----- mirR 21 15862
-----TCCGAGCCTGGGTCTCCCTCTT----- mirR 22 13440
-----TCCGAGCCTGGGTCTCCCTCTTC----- mirR 23 5959
-----TCCGAGCCTGGGTCTCCCTCTTCC----- mirR 24 1663
-----TCCGAGCCTGGGTCTCCCTC----- mirR 20 974
-----CCGAGCCTGGGTCTCCCTCT----- mirR 20 646
-----CCGAGCCTGGGTCTCCCTCTT----- mirR 21 628
-----TCCGAGCCTGGGTCTCCCT----- mirR 19 564
-----TCCGAGCCTGGGTCTCCCTCTTCCC----- mirR 25 547
-----CCGAGCCTGGGTCTCCCTCTTC----- mirR 22 185
-----CGAGCCTGGGTCTCCCTCTT----- mirR 20 60
-----CGAGCCTGGGTCTCCCTCT----- mirR 19 54

```



```

-----CCGAGCCTGGGTCTCCCTC----- mirR 19 44
-----CCGAGCCTGGGTCTCCCT----- mirR 18 38
-----CCGAGCCTGGGTCTCCCTCTTCC----- mirR 23 38
-----GAGCCTGGGTCTCCCTCT----- mirR 18 20
-----GTCCGAGCCTGGGTCTCCCTCT----- mirR 22 15
-----CGGTCCGAGCCTGGGTCTCCCTCT----- mirR 24 10
-----CCGAGCCTGGGTCTCCCTCTTCCC----- mirR 24 8
-----GTCCGAGCCTGGGTCTCCCTCTT----- mirR 23 7
-----GGTCCGAGCCTGGGTCTCCCTCT----- mirR 23 6
-----GGTCCGAGCCTGGGTCTCCCTCTTCC----- mirR 26 3
-----GAGCCTGGGTCTCCCTCTT----- mirR 19 3
-----CGGTCCGAGCCTGGGTCTCCCTCTT----- mirR 25 2
-----GGTCCGAGCCTGGGTCTC----- mirR 18 2
-----CGAGCCTGGGTCTCCCTCTTC----- mirR 21 1
-----GGTCCGAGCCTGGGTCTCCCT----- mirR 21 1
-----GGTCCGAGCCTGGGTCTCC----- mirR 19 1
-----GGTCCGAGCCTGGGTCTCCCTCTTCCC----- mirR 27 1
-----GTCCGAGCCTGGGTCTCCCTCTTC----- mirR 24 1
-----CGAGCCTGGGTCTCCCTCTTCC----- mirR 22 1
-----TCCCCCATCCCCCCTCA-- morR 18 11
-----TCTTCCCCCATCCCCC----- morR 18 11
-----CCCCCATCCCCCCTCAGC morR 19 2
-----TCCCCCATCCCCCCTCAGC morR 20 2
-----TCCCCCATCCCCCCTCAG- morR 19 1
-----CCCCCATCCCCCCTCAG- morR 18 1
-----TCTTCCCCCATCCCCCCT--- morR 19 1
-----TTCCCCCATCCCCCCTCA-- morR 19 1
-----CCCCCATCCCCCCTCAGC morR 18 1

>mmu-mir-1839
TCTGCCTTTAGCCTCCTACATGAAAAGGTAGATAGAACAGGTCTTGTGTTGCAAAATAAATTCAAGACCTACTTATCTACCAACAGCCATTGCCTACGTCCCACAGTC species len reads
----CCTTTAGCCTCCTACATG----- morL 18 2
TCTGCCTTTAGCCTCCTACATG----- morL 22 2
---GCCTTTAGCCTCCTACATG----- morL 19 1
----CCTTTAGCCTCCTACATGA----- morL 19 1
-----AAGGTAGATAGAACAGGTCTTG----- mirL 22 7247
-----AGGTAGATAGAACAGGTCTTG----- mirL 21 2926
-----AAGGTAGATAGAACAGGTCTTGT----- mirL 23 2907
-----AGGTAGATAGAACAGGTCTTGT----- mirL 22 1988
-----AAGGTAGATAGAACAGGTCTT----- mirL 21 1146
-----AAGGTAGATAGAACAGGTCT----- mirL 20 448
-----AAGGTAGATAGAACAGGTCTTGTT----- mirL 24 410
-----AGGTAGATAGAACAGGTCTT----- mirL 20 303
-----AGGTAGATAGAACAGGTCTTGTT----- mirL 23 260
-----AGGTAGATAGAACAGGTCT----- mirL 19 155
-----AGGTAGATAGAACAGGTCTTGTTT----- mirL 24 104

```

```

-----AAGGTAGATAGAACAGGTC----- mirL 19 60
-----AAGGTAGATAGAACAGGCTTGTTT----- mirL 25 49
-----AAAGGTAGATAGAACAGGCTTTG----- mirL 23 45
-----AGGTAGATAGAACAGGTC----- mirL 18 38
-----GGTAGATAGAACAGGCTTTG----- mirL 20 34
-----AAAGGTAGATAGAACAGGCTTGT----- mirL 24 16
-----AAAGGTAGATAGAACAGGCTTT----- mirL 22 11
-----GGTAGATAGAACAGGCTTT----- mirL 19 10
-----AAAGGTAGATAGAACAGGCTCT----- mirL 21 3
-----GAAAAGGTAGATAGAACA----- mirL 18 2
-----AAAAGGTAGATAGAACAGGCTTTG----- mirL 24 2
-----AAAGGTAGATAGAACAGGTC----- mirL 20 1
-----AAAGGTAGATAGAACAGGCTTGTTT----- mirL 26 1
-----AAAAGGTAGATAGAACAGGCTTT----- mirL 23 1
-----AAAGGTAGATAGAACAGGCTTGTT----- mirL 25 1
-----GTAGATAGAACAGGCTTTG----- mirL 19 1
-----TTGCAAAATAAAATTC AAGA----- loop 19 2
-----TGCAAAATAAAATTC AAGA----- loop 18 1
-----TGTTTGCAAAATAAAATTC----- loop 18 1
-----TGTTTGCAAAATAAAATTC A----- loop 19 1
-----AGACCTACTTATCTACCAACAG----- mirR 22 8377
-----AGACCTACTTATCTACCAACA----- mirR 21 7189
-----AGACCTACTTATCTACCAACAGC----- mirR 23 4080
-----AGACCTACTTATCTACCAACAGCC----- mirR 24 1921
-----AGACCTACTTATCTACCAAC----- mirR 20 572
-----AGACCTACTTATCTACCAACAGCCA----- mirR 25 330
-----AGACCTACTTATCTACCA----- mirR 18 166
-----AAGACCTACTTATCTACCAACA----- mirR 22 70
-----CAAGACCTACTTATCTACCAA----- mirR 21 68
-----GACCTACTTATCTACCAACAGC----- mirR 22 44
-----GACCTACTTATCTACCAACAG----- mirR 21 43
-----CCTACTTATCTACCAACAGC----- mirR 20 43
-----ACCTACTTATCTACCAACAGCC----- mirR 22 36
-----CAAGACCTACTTATCTACCAAC----- mirR 22 35
-----GACCTACTTATCTACCAACA----- mirR 20 32
-----ACCTACTTATCTACCAACAGC----- mirR 21 31
-----CCTACTTATCTACCAACA----- mirR 18 19
-----GACCTACTTATCTACCAACAGCC----- mirR 23 16
-----AAGACCTACTTATCTACCAACAG----- mirR 23 15
-----AAGACCTACTTATCTACCAACAGC----- mirR 24 13
-----CAAGACCTACTTATCTACCAACA----- mirR 23 13
-----ACCTACTTATCTACCAACAG----- mirR 20 10
-----ACCTACTTATCTACCAACA----- mirR 19 10
-----ACCTACTTATCTACCAAC----- mirR 18 10
-----CCTACTTATCTACCAACAG----- mirR 19 9
-----CAAGACCTACTTATCTACCA----- mirR 20 6

```

```

-----TCAAGACCTACTTATCTACCAAC----- mirR 23 6
-----CCTACTTATCTACCAACAGCC----- mirR 21 6
-----AAGACCTACTTATCTACCAAC----- mirR 21 5
-----AAGACCTACTTATCTACCAACAGCC----- mirR 25 2
-----ACCTACTTATCTACCAACAGCCA----- mirR 23 1
-----AAGACCTACTTATCTACCA----- mirR 19 1
-----AAGACCTACTTATCTACC----- mirR 18 1
-----CAAGACCTACTTATCTAC----- mirR 18 1
-----TCAAGACCTACTTATCTACCA----- mirR 22 1
-----GACCTACTTATCTACCAACAGCCA----- mirR 24 1
-----TCAAGACCTACTTATCTACCAACAGCC----- mirR 27 1
-----CAAGACCTACTTATCTACC----- mirR 19 1
-----ATTGCCTACGTCCCACAG-- morR 18 3
-----GCCATGCCTACGTCCCA----- morR 18 2
-----CAGCCATTGCCTACGTCC----- morR 18 1
-----TTGCCTACGTCCCACAGTC morR 19 1

>mmu-mir-363
AATGAACTGTTTTGCTGTTATCAGGTGGAACACGATGCAATTTTGGTTGGTGTAATAGGAGGAAAATTGCACGGTATCCATCTGTAAACCGCAGGACCTATGTGGACAGCCGTCTATCAGT species len reads
AATGAACTGTTTTGCTGT----- morL 18 3
-ATGAACTGTTTTGCTGTT----- morL 18 3
-ATGAACTGTTTTGCTGTTATC----- morL 21 1
-----CAGGTGGAACACGATGCAATTT----- mirL 22 1044
-----CAGGTGGAACACGATGCAATTT----- mirL 23 397
-----CAGGTGGAACACGATGCAATT----- mirL 21 285
-----GGTGGAACACGATGCAATTT----- mirL 20 39
-----CAGGTGGAACACGATGCAAT----- mirL 20 38
-----CAGGTGGAACACGATGCAA----- mirL 19 26
-----CAGGTGGAACACGATGCAATTTTG----- mirL 24 23
-----GTGGAACACGATGCAATTT----- mirL 19 18
-----CAGGTGGAACACGATGCA----- mirL 18 16
-----GGTGGAACACGATGCAATT----- mirL 19 11
-----AGGTGGAACACGATGCAATTT----- mirL 21 10
-----GTGGAACACGATGCAATT----- mirL 18 8
-----ATCAGGTGGAACACGATGCAATT----- mirL 23 2
-----TCAGGTGGAACACGATGCAATT----- mirL 22 2
-----TATCAGGTGGAACACGATGCAAT----- mirL 23 1
-----TCAGGTGGAACACGATGC----- mirL 18 1
-----TCAGGTGGAACACGATGCAA----- mirL 20 1
-----AGGTGGAACACGATGCAA----- mirL 18 1
-----AGGTGGAACACGATGCAAT----- mirL 19 1
-----TCAGGTGGAACACGATGCAATTT----- mirL 24 1
-----GGTGGAACACGATGCAAT----- mirL 18 1
-----GGTTGGTGTAATAGGAGGAA----- loop 20 12
-----GGTTGGTGTAATAGGAGGAAA----- loop 21 5
-----TGTTGGTGTAATAGGAGGAAA----- loop 22 4

```

```

-----TGTTGGTGTAATAGGAGGAAAA----- loop 23 4
-----GGTTGGTGTAATAGGAGG----- loop 18 2
-----GTTGGTGTAATAGGAGGA----- loop 18 2
-----TGTTGGTGTAATAGGAGGAA----- loop 21 2
-----GGTTGGTGTAATAGGAGGAAAA----- loop 22 1
-----ATTGCACGGTATCCATCTGTAA----- mirR 22 16426
-----AATTGCACGGTATCCATCTGTAA----- mirR 23 14142
-----AATTGCACGGTATCCATCTGT----- mirR 21 2488
-----AATTGCACGGTATCCATCTGTA----- mirR 22 1272
-----AATTGCACGGTATCCATCTG----- mirR 20 1158
-----ATTGCACGGTATCCATCTGTAAA----- mirR 23 943
-----ATTGCACGGTATCCATCTGT----- mirR 20 663
-----ATTGCACGGTATCCATCTGTA----- mirR 21 482
-----AATTGCACGGTATCCATCTGTAAA----- mirR 24 332
-----AATTGCACGGTATCCATCT----- mirR 19 204
-----ATTGCACGGTATCCATCTG----- mirR 19 201
-----ATTGCACGGTATCCATCTGTAAAC----- mirR 24 155
-----TTGCACGGTATCCATCTGTAA----- mirR 21 126
-----AATTGCACGGTATCCATC----- mirR 18 85
-----AAATTGCACGGTATCCATCTGTAA----- mirR 24 69
-----TTGCACGGTATCCATCTGTAAA----- mirR 22 59
-----TGCACGGTATCCATCTGTAA----- mirR 20 54
-----ATTGCACGGTATCCATCT----- mirR 18 53
-----AAATTGCACGGTATCCATCTGT----- mirR 22 30
-----TTGCACGGTATCCATCTG----- mirR 18 29
-----TGCACGGTATCCATCTGT----- mirR 18 27
-----TTGCACGGTATCCATCTGT----- mirR 19 26
-----TTGCACGGTATCCATCTGTAAAC----- mirR 23 12
-----AAATTGCACGGTATCCATCTG----- mirR 21 8
-----TTGCACGGTATCCATCTGTAA----- mirR 20 7
-----GCACGGTATCCATCTGTAA----- mirR 19 7
-----AAATTGCACGGTATCCATCTGTAA----- mirR 23 5
-----TGCACGGTATCCATCTGTAAAC----- mirR 22 4
-----TGCACGGTATCCATCTGTAA----- mirR 19 3
-----AAAATTGCACGGTATCCATCTGTAA----- mirR 25 3
-----AAATTGCACGGTATCCATCTGTAA----- mirR 25 2
-----AAATTGCACGGTATCCATCT----- mirR 20 1
-----CGCAGGACCTATGTGGAC----- morR 18 6
-----GCAGGACCTATGTGGACA----- morR 18 6
-----AACCGCAGGACCTATGTGGACAGCCGTCTATCAGT morR 35 4
-----AACCGCAGGACCTATGTGGACAGCCGTC----- morR 28 4
-----AACCGCAGGACCTATGTGG----- morR 19 2
-----AACCGCAGGACCTATGTGGACAGC----- morR 24 1
-----AACCGCAGGACCTATGTGGACAGCCGTC----- morR 29 1

```

>mmu-mir-323

|                                                                                                       | species | len | reads |
|-------------------------------------------------------------------------------------------------------|---------|-----|-------|
| CTGCTGCTGCTTGGTACTTGGAGAGAGGTTCCGTGGCGCGTTTCGCTTCATTTATGGCGCACATTACACGGTCGACCTCTTTGCGGTATCTAATCCCGCCT | morL    | 20  | 49    |
| ----GCTGCTTGGTACTTGGAGAG-----                                                                         | morL    | 19  | 30    |
| ----CTGCTTGGTACTTGGAGAG-----                                                                          | morL    | 21  | 8     |
| ----TGCTGCTTGGTACTTGGAGAG-----                                                                        | morL    | 22  | 7     |
| ---CTGCTGCTTGGTACTTGGAGAG-----                                                                        | morL    | 21  | 3     |
| ----GCTGCTTGGTACTTGGAGAGA-----                                                                        | morL    | 18  | 2     |
| ----TGCTGCTTGGTACTTGGAG-----                                                                          | morL    | 18  | 2     |
| ----TGCTTGGTACTTGGAGAG-----                                                                           | morL    | 20  | 2     |
| ----CTGCTTGGTACTTGGAGAGA-----                                                                         | morL    | 19  | 1     |
| ----GCTGCTTGGTACTTGGAG-----                                                                           | morL    | 22  | 1     |
| CTGCTGCTGCTTGGTACTTGGAG-----                                                                          | morL    | 18  | 1     |
| ----GCTGCTTGGTACTTGGAG-----                                                                           | mirL    | 21  | 131   |
| -----AGGTGGTCCGTGGCGCGTTTCG-----                                                                      | mirL    | 22  | 124   |
| -----AGGTGGTCCGTGGCGCGTTTCGC-----                                                                     | mirL    | 19  | 29    |
| -----AGGTGGTCCGTGGCGCGTT-----                                                                         | mirL    | 20  | 24    |
| -----AGGTGGTCCGTGGCGCGTTTC-----                                                                       | mirL    | 23  | 21    |
| -----AGGTGGTCCGTGGCGCGTTTCGCT-----                                                                    | mirL    | 24  | 5     |
| -----AGGTGGTCCGTGGCGCGTT-----                                                                         | mirL    | 18  | 4     |
| -----GTGGTCCGTGGCGCGTTTCGC-----                                                                       | mirL    | 20  | 2     |
| -----GGTGGTCCGTGGCGCGTTTCGCT-----                                                                     | mirL    | 22  | 1     |
| -----CACATTACACGGTCGACCTCT-----                                                                       | mirR    | 21  | 21468 |
| -----GCACATTACACGGTCGACCTCT-----                                                                      | mirR    | 22  | 12905 |
| -----CACATTACACGGTCGACCTCTT-----                                                                      | mirR    | 22  | 1859  |
| -----GCACATTACACGGTCGACCTCTT-----                                                                     | mirR    | 23  | 1354  |
| -----CACATTACACGGTCGACCTC-----                                                                        | mirR    | 20  | 544   |
| -----GCACATTACACGGTCGACCTC-----                                                                       | mirR    | 21  | 390   |
| -----CACATTACACGGTCGACCTCTTT-----                                                                     | mirR    | 23  | 358   |
| -----CACATTACACGGTCGACCT-----                                                                         | mirR    | 19  | 240   |
| -----GCACATTACACGGTCGACCT-----                                                                        | mirR    | 20  | 221   |
| -----GCACATTACACGGTCGACCTCTTT-----                                                                    | mirR    | 24  | 182   |
| -----ACATTACACGGTCGACCTCT-----                                                                        | mirR    | 20  | 58    |
| -----CGCACATTACACGGTCGACCTCT-----                                                                     | mirR    | 23  | 51    |
| -----CACATTACACGGTCGACCTCTTTG-----                                                                    | mirR    | 24  | 36    |
| -----CACATTACACGGTCGACCT-----                                                                         | mirR    | 18  | 29    |
| -----CATTACACGGTCGACCTCT-----                                                                         | mirR    | 19  | 26    |
| -----GCACATTACACGGTCGACCTCTTTG-----                                                                   | mirR    | 25  | 23    |
| -----GCACATTACACGGTCGAC-----                                                                          | mirR    | 18  | 13    |
| -----ATTACACGGTCGACCTCT-----                                                                          | mirR    | 18  | 9     |
| -----CATTACACGGTCGACCTCTT-----                                                                        | mirR    | 20  | 5     |
| -----ATTACACGGTCGACCTCTT-----                                                                         | mirR    | 19  | 3     |
| -----ACATTACACGGTCGACCTCTT-----                                                                       | mirR    | 21  | 2     |
| -----ACATTACACGGTCGACCT-----                                                                          | mirR    | 18  | 2     |
| -----CATTACACGGTCGACCTC-----                                                                          | mirR    | 18  | 2     |
| -----CGCACATTACACGGTCGACCTCTTT-----                                                                   | mirR    | 25  | 1     |
| -----CGCACATTACACGGTCGACCT-----                                                                       | mirR    | 21  | 1     |

```

-----CGCACATTACACGGTCGACCTC----- mirR 22 1
-----CGCACATTACACGGTCGACCTCTT----- mirR 24 1
-----ACATTACACGGTCGACCTC----- mirR 19 1
-----CGCACATTACACGGTCGA----- mirR 18 1
-----GCGCACATTACACGGTCGACCTCT----- mirR 24 1
-----GCGGTATCTAATCCCGCC----- morR 18 1
-----TTGCGGTATCTAATCCCGCCT morR 21 1

>mmu-mir-181d
CCACAGCAAAGGTCACAATTAACATTCATTGTTGTCGGTGGGTGTTGTGAGGAGGCAGCCAGACCCACCGGGGATGAATGTCTACTGTGGCTGGGCCAAACAACA species len reads
CCACAGCAAAGGTCACAATT----- morL 20 11
-CACAGCAAAGGTCACAATT----- morL 19 2
-----GCAAAGGTCACAATTAAC----- morL 18 1
-----AACATTCATTGTTGTCGGTGGGT----- mirL 24 14682
-----AACATTCATTGTTGTCGGTGGGT----- mirL 23 12266
-----AACATTCATTGTTGTCGGTGGGTG----- mirL 25 5720
-----AACATTCATTGTTGTCGGTGGGTGTT----- mirL 26 2754
-----AACATTCATTGTTGTCGGTGGG----- mirL 22 1053
-----AACATTCATTGTTGTCGGTGGGTG----- mirL 27 440
-----AACATTCATTGTTGTCGGTGG----- mirL 21 391
-----ACATTCATTGTTGTCGGTGGGT----- mirL 23 244
-----ACATTCATTGTTGTCGGTGGGT----- mirL 22 144
-----ACATTCATTGTTGTCGGTGGGTG----- mirL 24 122
-----CATTCATTGTTGTCGGTGGGT----- mirL 22 107
-----ATTCATTGTTGTCGGTGGGT----- mirL 21 71
-----TAACATTCATTGTTGTCGGTGGGT----- mirL 24 40
-----ACATTCATTGTTGTCGGTGGGTGTT----- mirL 25 20
-----CATTCATTGTTGTCGGTGGGTGTT----- mirL 24 19
-----CATTCATTGTTGTCGGTGGGT----- mirL 21 15
-----ATTCATTGTTGTCGGTGGGT----- mirL 20 15
-----ATTCATTGTTGTCGGTGG----- mirL 18 6
-----TAACATTCATTGTTGTCGGTGGGT----- mirL 25 6
-----ACATTCATTGTTGTCGGTGGG----- mirL 21 4
-----TAACATTCATTGTTGTCGGTGGG----- mirL 23 3
-----ATTCATTGTTGTCGGTGGGTG----- mirL 22 3
-----ACATTCATTGTTGTCGGTGGGTGTT----- mirL 26 2
-----ACATTCATTGTTGTCGGT----- mirL 18 2
-----ATTAACATTCATTGTTGTCG----- mirL 20 2
-----CATTCATTGTTGTCGGTGGGTG----- mirL 23 2
-----TAACATTCATTGTTGTCGGTGG----- mirL 22 2
-----ATTCATTGTTGTCGGTGGGTGTT----- mirL 23 1
-----TAACATTCATTGTTGTCGGTGGGTGTT----- mirL 27 1
-----ATTAACATTCATTGTTGTC----- mirL 19 1
-----CATTCATTGTTGTCGGTGGG----- mirL 20 1
-----GTGAGGAGGCAGCCAGAC----- loop 18 7
-----TGTGAGGAGGCAGCCAGA----- loop 18 2

```

```

-----GTTGTGAGGAGGCAGCCA----- loop 18 1
-----TTGTGAGGAGGCAGCCAG----- loop 18 1
-----TGAGGAGGCAGCCAGACC----- loop 18 1
-----GTTGTGAGGAGGCAGCCAG----- loop 19 1
-----GAGGAGGCAGCCAGACCC----- loop 18 1
-----TGTGAGGAGGCAGCCAGACCC----- loop 21 1
-----CCCACCGGGGATGAATGTCA----- mirR 21 833
-----CCACCGGGGATGAATGTCA----- mirR 20 354
-----CCACCGGGGATGAATGTCAC----- mirR 21 38
-----ACCCACCGGGGATGAATGTCA----- mirR 22 21
-----CCACCGGGGATGAATGTCACT----- mirR 22 14
-----CCCACCGGGGATGAATGTCA----- mirR 22 12
-----CCCACCGGGGATGAATGT----- mirR 19 6
-----CCACCGGGGATGAATGT----- mirR 18 5
-----CCCACCGGGGATGAATGTCACT----- mirR 23 3
-----CCACCGGGGATGAATGTCACTG----- mirR 23 2
-----CCCACCGGGGATGAATGTC----- mirR 20 2
-----ACCGGGGATGAATGTCA----- mirR 19 2
-----CCACCGGGGATGAATGTC----- mirR 19 2
-----ACCGGGGATGAATGTCA----- mirR 18 1
-----CCCACCGGGGATGAATG----- mirR 18 1
-----ACCCACCGGGGATGAATGT----- mirR 20 1
-----ACCCACCGGGGATGAATGTC----- mirR 21 1
-----CACCGGGGATGAATGTCA----- mirR 20 1
-----ACTGTGGCTGGCCAAAC----- morR 18 31
-----GTGGCTGGCCAAACAAC----- morR 18 2
-----ACTGTGGCTGGCCAAACAACA morR 22 1
-----CTGTGGCTGGCCAAACA----- morR 18 1
-----ACTGTGGCTGGCCAAACA----- morR 19 1

```

>mmu-mir-369

```

CTCAGCTCAACACCTCTGCTGGTACTTGAAGGGAGATCGACCGTGTATATTGCGTTGGCTGACTTCGAATAATACATGGTTGATCTTTTCTCAGTATCAACGCTCAGCT species len reads
-----CCTCTGCTGGTACTTGAAGGG----- morL 21 35
-----CTCTGCTGGTACTTGAAGGG----- morL 20 35
-----ACCTCTGCTGGTACTTGAAGGG----- morL 22 17
-----CAACACCTCTGCTGGTACTTGAAGGG----- morL 26 7
-----ACACCTCTGCTGGTACTTGAAGGG----- morL 24 5
-----CACCTCTGCTGGTACTTGAAG----- morL 21 4
CTCAGCTCAACACCTCTGCTGGTACTTGAAG----- morL 32 3
-----CTCTGCTGGTACTTGAAGGGAG----- morL 22 2
-----TCTGCTGGTACTTGAAGG----- morL 18 2
-----TCTGCTGGTACTTGAAGGG----- morL 19 1
CTCAGCTCAACACCTCTGCTGGTACTTGAAG----- morL 31 1
-----CTCTGCTGGTACTTGAAGGGA----- morL 21 1
-----GCTGGTACTTGAAGGGAG----- morL 18 1
-----CTGGTACTTGAAGGGAGA----- morL 18 1

```

```

-----AGATCGACCGTGTATATTCGC----- mirL 22 13960
-----AGATCGACCGTGTATATTCG----- mirL 21 4919
-----AGATCGACCGTGTATATT----- mirL 19 4797
-----AGATCGACCGTGTATATTC----- mirL 20 1940
-----AGATCGACCGTGTATATTCGCT----- mirL 23 1144
-----AGATCGACCGTGTATAT----- mirL 18 132
-----AGATCGACCGTGTATATTCGCTT----- mirL 24 84
-----GATCGACCGTGTATATTC----- mirL 19 58
-----GATCGACCGTGTATATTCGC----- mirL 21 37
-----TCGACCGTGTATATTCG----- mirL 18 21
-----GATCGACCGTGTATATT----- mirL 18 14
-----TCGACCGTGTATATTCGC----- mirL 19 13
-----GGAGATCGACCGTGTATATTC----- mirL 22 13
-----GATCGACCGTGTATATTCG----- mirL 20 13
-----GAGATCGACCGTGTATATTCGC----- mirL 23 11
-----GAGATCGACCGTGTATATT----- mirL 20 6
-----ATCGACCGTGTATATTCG----- mirL 19 5
-----GAGATCGACCGTGTATATTC----- mirL 21 5
-----GAGATCGACCGTGTATATTCG----- mirL 22 4
-----ATCGACCGTGTATATTC----- mirL 18 4
-----ATCGACCGTGTATATTCGC----- mirL 20 2
-----GGGAGATCGACCGTGTATA----- mirL 20 1
-----ATCGACCGTGTATATTCGCT----- mirL 21 1
-----GCTTGGCTGACTTCGAAT----- loop 18 1
-----AATAATACATGGTTGATCTTT----- mirR 21 7187
-----AATAATACATGGTTGATCTTT----- mirR 22 1513
-----GAATAATACATGGTTGATCTTT----- mirR 22 1474
-----AATAATACATGGTTGATCTT----- mirR 20 833
-----AATAATACATGGTTGATCTTTCT----- mirR 23 351
-----GAATAATACATGGTTGATCTT----- mirR 21 170
-----GAATAATACATGGTTGATCTTTT----- mirR 23 161
-----AATAATACATGGTTGATCT----- mirR 19 107
-----GAATAATACATGGTTGATCTTTCT----- mirR 24 54
-----AATAATACATGGTTGATC----- mirR 18 42
-----ATAATACATGGTTGATCTTTCT----- mirR 22 25
-----ATAATACATGGTTGATCTT----- mirR 19 24
-----AATAATACATGGTTGATCTTTCT----- mirR 24 22
-----ATAATACATGGTTGATCTTTT----- mirR 21 19
-----CGAATAATACATGGTTGATCTTT----- mirR 23 16
-----ATAATACATGGTTGATCTTT----- mirR 20 15
-----GAATAATACATGGTTGATCT----- mirR 20 14
-----AATACATGGTTGATCTTT----- mirR 18 14
-----GAATAATACATGGTTGAT----- mirR 18 13
-----GAATAATACATGGTTGATC----- mirR 19 9
-----AATACATGGTTGATCTTTCT----- mirR 20 3
-----AATACATGGTTGATCTTTT----- mirR 19 2

```



```

-----CGAATAATACATGGTTGATCTT----- mirR 22 1
-----TAATACATGGTTGATCTT----- mirR 18 1
-----TAATACATGGTTGATCTTTTCT----- mirR 22 1
-----TAATACATGGTTGATCTTTT----- mirR 20 1
-----TCTCAGTATCAACGCTCAGCT morR 21 8
-----TCAGTATCAACGCTCAGC- morR 18 2

```

>mmu-mir-101b

```

TCTGAGACTGAACTGCCCTTTTTTCGGTTATCATGGTACCGATGCTGTAGCTCTGAAAGGTACAGTACTGTGATAGCTGAAGAATGGCGGTGCCATCACGTT species len reads
-CTGAGACTGAACTGCCCTTTTT----- morL 22 32
----AGACTGAACTGCCCTTTTT----- morL 19 19
-CTGAGACTGAACTGCCCTTTTT----- morL 21 18
TCTGAGACTGAACTGCCCTTTTT----- morL 22 8
----GACTGAACTGCCCTTTTT----- morL 18 7
----AGACTGAACTGCCCTTTTT----- morL 18 3
--GAGACTGAACTGCCCTTT----- morL 18 3
-CTGAGACTGAACTGCCCTTT----- morL 20 3
--GAGACTGAACTGCCCTTTTT----- morL 20 2
-CTGAGACTGAACTGCCCTT----- morL 19 2
--TGAGACTGAACTGCCCTTT----- morL 20 2
----GACTGAACTGCCCTTTTTTC----- morL 19 2
--GAGACTGAACTGCCCTTT----- morL 19 1
----ACTGAACTGCCCTTTTTTC----- morL 18 1
-----CGGTTATCATGGTACCGATGCT----- mirL 22 250
-----TCGGTTATCATGGTACCGATGCT----- mirL 23 34
-----CGGTTATCATGGTACCGATGC----- mirL 21 28
-----TCGGTTATCATGGTACCGATGC----- mirL 22 19
-----TCGGTTATCATGGTACCGATG----- mirL 21 18
-----CGGTTATCATGGTACCGATGCTG----- mirL 23 17
-----CGGTTATCATGGTACCGATGCTGCTCT----- mirL 30 16
-----CGGTTATCATGGTACCGATGCTGTAGCTC----- mirL 29 6
-----CGGTTATCATGGTACCGATGCTGTA----- mirL 25 3
-----GGTTATCATGGTACCGATGCTG----- mirL 22 3
-----CGGTTATCATGGTACCGATGCTGT----- mirL 24 2
-----GGTTATCATGGTACCGATGCTGTA----- mirL 24 1
-----TTCGGTTATCATGGTACC----- mirL 18 1
-----GGTTATCATGGTACCGATGC----- mirL 20 1
-----CTGTAGCTCTGAAAGGTA----- loop 18 1
-----GCTGTAGCTCTGAAAGGT----- loop 18 1
-----GTACAGTACTGTGATAGCTGAA----- mirR 22 14141
-----GTACAGTACTGTGATAGCTGA----- mirR 21 7273
-----GTACAGTACTGTGATAGCTGAAG----- mirR 23 5846
-----TACAGTACTGTGATAGCTGAAG----- mirR 22 3084
-----TACAGTACTGTGATAGCTGAAGA----- mirR 23 2156
-----TACAGTACTGTGATAGCTGAA----- mirR 21 1247
-----TACAGTACTGTGATAGCTGA----- mirR 20 905

```

```

-----ACAGTACTGTGATAGCTGAAGA----- mirR 22 640
-----GTACAGTACTGTGATAGCTGAAGA----- mirR 24 528
-----GTACAGTACTGTGATAGCTG----- mirR 20 504
-----ACAGTACTGTGATAGCTGAAG----- mirR 21 348
-----TACAGTACTGTGATAGCTGAAGAA----- mirR 24 276
-----ACAGTACTGTGATAGCTGAA----- mirR 20 235
-----GTACAGTACTGTGATAGCT----- mirR 19 212
-----ACAGTACTGTGATAGCTGAAGAA----- mirR 23 193
-----GTACAGTACTGTGATAGCT----- mirR 18 137
-----TACAGTACTGTGATAGCTG----- mirR 19 121
-----ACAGTACTGTGATAGCTGA----- mirR 19 101
-----TACAGTACTGTGATAGCT----- mirR 18 65
-----CAGTACTGTGATAGCTGAAGA----- mirR 21 44
-----CAGTACTGTGATAGCTGAAGAA----- mirR 22 26
-----ACAGTACTGTGATAGCTGAAGAAT----- mirR 24 18
-----CAGTACTGTGATAGCTGAA----- mirR 19 11
-----ACAGTACTGTGATAGCTG----- mirR 18 11
-----GGTACAGTACTGTGATAGCTGAA----- mirR 23 11
-----CAGTACTGTGATAGCTGAAG----- mirR 20 7
-----AGGTACAGTACTGTGATAGCTGAA----- mirR 24 4
-----CAGTACTGTGATAGCTGA----- mirR 18 4
-----CAGTACTGTGATAGCTGAAGAAT----- mirR 23 2
-----GGTACAGTACTGTGATAGCTGAAG----- mirR 24 2
-----GGTACAGTACTGTGATAGCTGA----- mirR 22 1
-----GGTACAGTACTGTGATAGCT----- mirR 20 1
-----CAGTACTGTGATAGCTGAAGAATG----- mirR 24 1
-----GAATGGCGGTGCCATCAC--- morR 18 5
-----AGAATGGCGGTGCCATCA--- morR 18 4
-----AAGAATGGCGGTGCCATC--- morR 18 3
-----AGAATGGCGGTGCCATCAC--- morR 19 2
-----ATGGCGGTGCCATCACGTT morR 19 1

```

>mmu-mir-720

```

CCTGAGGCAGCCCTTCAACCCTGGAGCCCCAGAATGAAGATGCAGCTTTAGAATTTGGGTGGTCTATCTCGCTGGGGCCTCCAGAAAATGTGAATCCCACTGAG species len reads
---GAGGCAGCCCTTCAACCC----- morL 18 4
CCTGAGGCAGCCCTTCAAC----- morL 19 4
-CTGAGGCAGCCCTTCAACC----- morL 19 3
---AGGCAGCCCTTCAACCCT----- morL 18 2
-CTGAGGCAGCCCTTCAAC----- morL 18 1
CCTGAGGCAGCCCTTCAACCC----- morL 21 1
CCTGAGGCAGCCCTTCAA----- morL 18 1
---TGAGGCAGCCCTTCAACCCT----- morL 20 1
-----CCTGGAGCCCCAGAATGA----- mirL 18 7
-----CTGGAGCCCCAGAATGAA----- mirL 18 3
-----ACCCTGGAGCCCCAGAAT----- mirL 18 2
-----TGGAGCCCCAGAATGAAG----- mirL 18 1

```

```

-----ACCCTGGAGCCCCAGAATG-----
-----ATCTCGCTGGGGCCTCCA----- mirL 19 1
-----TCTCGCTGGGGCCTCCAG----- mirR 18 27477
-----ATCTCGCTGGGGCCTCCAG----- mirR 18 5096
-----TCTCGCTGGGGCCTCCAGA----- mirR 19 2203
-----TCTCGCTGGGGCCTCCAGAA----- mirR 19 475
-----TATCTCGCTGGGGCCTCCA----- mirR 20 331
-----TCTCGCTGGGGCCTCCAGAAA----- mirR 19 75
-----ATCTCGCTGGGGCCTCCAGA----- mirR 21 66
-----ATCTCGCTGGGGCCTCCAGAA----- mirR 20 63
-----CTCGCTGGGGCCTCCAGA----- mirR 21 37
-----TCTCGCTGGGGCCTCCAGAAAA----- mirR 18 36
-----CTATCTCGCTGGGGCCTCCA----- mirR 22 30
-----CTCGCTGGGGCCTCCAGAA----- mirR 20 30
-----ATCTCGCTGGGGCCTCCAGAAA----- mirR 19 13
-----TCTATCTCGCTGGGGCCTCCA----- mirR 22 8
-----TCTATCTCGCTGGGGCCTCCA----- mirR 21 6
-----TATCTCGCTGGGGCCTCCAG----- mirR 20 2
-----CTCGCTGGGGCCTCCAGAAAA----- mirR 21 2
-----TCTATCTCGCTGGGGCCT----- mirR 18 1
-----CTCGCTGGGGCCTCCAGAAA----- mirR 20 1
-----ATCTCGCTGGGGCCTCCAGAAAA----- mirR 23 1
-----TCTCGCTGGGGCCTCCAGAAAAAT----- mirR 23 1
-----TATCTCGCTGGGGCCTCC----- mirR 18 1
-----TCGCTGGGGCCTCCAGAA----- mirR 18 1
-----AGAAAAATGTGAATCCCAC----- morR 18 3
-----CAGAAAAATGTGAATCCCAC----- morR 19 1
-----AATGTGAATCCCCTGAG----- morR 18 1

```

>mmu-mir-335

```

AGATTTCTTTGGGCGGGGTCAAGAGCAATAACGAAAAATGTTGTTTTTCGTAAACCGTTTTTCATTATGCTCCTGACCCCTCTCATGGGTTATAGCCAGTCGAGTAAGTA species len reads
---TTTCTTTGGGCGGGGT----- morL 18 3
AGATTTCTTTGGGCGGGGT----- morL 21 2
---TTTCTTTGGGCGGGGTC----- morL 19 1
---TTTCTTTGGGCGGGGTCA----- morL 20 1
-----TCAAGAGCAATAACGAAAAATGT----- mirL 23 11824
-----TCAAGAGCAATAACGAAAAATG----- mirL 22 2793
-----AAGAGCAATAACGAAAAATGTT----- mirL 22 571
-----TCAAGAGCAATAACGAAAAATGTT----- mirL 24 562
-----CAAGAGCAATAACGAAAAATGT----- mirL 22 490
-----TCAAGAGCAATAACGAAAAAT----- mirL 21 431
-----AAGAGCAATAACGAAAAATGT----- mirL 21 260
-----TCAAGAGCAATAACGAAAA----- mirL 20 117
-----TCAAGAGCAATAACGAAAA----- mirL 19 112
-----CAAGAGCAATAACGAAAAATG----- mirL 21 101
-----TCAAGAGCAATAACGAAA----- mirL 18 35
-----AGAGCAATAACGAAAAATGTT----- mirL 22 33

```

```

-----AAGAGCAATAACGAAAAATGTTT----- mirL 23 25
-----GTC AAGAGCAATAACGAAAAATGT----- mirL 24 20
-----AAGAGCAATAACGAAAAATG----- mirL 20 16
-----CAAGAGCAATAACGAAAAATGTT----- mirL 23 15
-----AGAGCAATAACGAAAAATGT----- mirL 20 11
-----CAAGAGCAATAACGAAAAAT----- mirL 20 7
-----CAAGAGCAATAACGAAAA----- mirL 19 6
-----AGAGCAATAACGAAAAATGTT----- mirL 21 6
-----CAAGAGCAATAACGAAAA----- mirL 18 6
-----GTC AAGAGCAATAACGAAAAAT----- mirL 22 5
-----CAAGAGCAATAACGAAAAATGTTT----- mirL 24 5
-----AAGAGCAATAACGAAAAATGTTTG----- mirL 24 5
-----AAGAGCAATAACGAAAAATGTTTGT----- mirL 25 2
-----AGAGCAATAACGAAAAATG----- mirL 19 2
-----AGAGCAATAACGAAAAATGTTTGT----- mirL 25 2
-----AGAGCAATAACGAAAAATGTTTG----- mirL 23 2
-----GGTCAAGAGCAATAACGAAAAATG----- mirL 24 1
-----GGTCAAGAGCAATAACGAAA----- mirL 21 1
-----AAGAGCAATAACGAAAA----- mirL 18 1
-----GTTTTTCGTAAACCGTT----- loop 18 4
-----TGTTTGTTTTTTCGTAAAC----- loop 18 1
-----TTTTTCATTATTGCTCCTGACC----- mirR 22 5643
-----GTTTTTCATTATTGCTCCTGACC----- mirR 23 5083
-----TTTTTCATTATTGCTCCTGAC----- mirR 21 2165
-----GTTTTTCATTATTGCTCCTGAC----- mirR 22 1458
-----TTTTTCATTATTGCTCCTGA----- mirR 20 495
-----TTTTTCATTATTGCTCCTGACCC----- mirR 23 468
-----GTTTTTCATTATTGCTCCTGACCC----- mirR 24 435
-----TTTTTCATTATTGCTCCTGACC----- mirR 21 373
-----GTTTTTCATTATTGCTCCTGA----- mirR 21 347
-----CGTTTTTCATTATTGCTCCTGA----- mirR 22 331
-----TTTTTCATTATTGCTCCTGAC----- mirR 20 274
-----TTTTTCATTATTGCTCCTGACCCC----- mirR 24 225
-----CCGTTTTTCATTATTGCTCCTG----- mirR 22 160
-----GTTTTTCATTATTGCTCCTGACCCC----- mirR 25 137
-----CGTTTTTCATTATTGCTCCTGAC----- mirR 23 125
-----TTTTTCATTATTGCTCCTG----- mirR 19 90
-----CCGTTTTTCATTATTGCTCCTGA----- mirR 23 86
-----TTTTTCATTATTGCTCCTGACCC----- mirR 22 70
-----CGTTTTTCATTATTGCTCCTGACCC----- mirR 24 67
-----TTTTTCATTATTGCTCCTGACCCCC----- mirR 25 65
-----GTTTTTCATTATTGCTCCTG----- mirR 20 50
-----TTTTTCATTATTGCTCCTGA----- mirR 19 46
-----GTTTTTCATTATTGCTCCT----- mirR 19 31
-----TTTTTCATTATTGCTCCTGACCCC----- mirR 23 27
-----TTTTTCATTATTGCTCCTG----- mirR 18 26

```

```

-----TTCATTATTGCTCCTGACC----- mirR 19 26
-----CCGTTTTTCATTATTGCTCCT----- mirR 21 18
-----CGTTTTTCATTATTGCTCCTG----- mirR 21 18
-----CCGTTTTTCATTATTGCTCCTGACC----- mirR 25 12
-----TTCATTATTGCTCCTGACC----- mirR 20 9
-----TTCATTATTGCTCCTGAC----- mirR 18 9
-----CGTTTTTCATTATTGCTCCT----- mirR 20 5
-----CCGTTTTTCATTATTGCTCCT----- mirR 20 4
-----TTCATTATTGCTCCTGACCC----- mirR 21 3
-----TTTCATTATTGCTCCTGA----- mirR 18 3
-----TTTTTCATTATTGCTCCTGACCCCT----- mirR 25 2
-----TTCATTATTGCTCCTGACCC----- mirR 21 1
-----TTCATTATTGCTCCTGACCC----- mirR 20 1
-----TTTCATTATTGCTCCTGACCC----- mirR 22 1
-----CCCTCTCATGGGTTATAGCCAGTCGAGTAAGTA morR 33 2
-----CCCTCTCATGGGTTATAGCCAGTCGAGTAAGT- morR 32 1
-----ACCCCTCTCATGGGTTA----- morR 18 1

```

>mmu-mir-200b

```

ATCCAACCTGGGCAGCCGTCATCTTACTGGGCAGCATTGGATAGTGTCTGATCTCTAATACTGCCTGGTAATGATGACGGCGGAGCCCTGCATGCAGCA species len reads
--TCCAACCTGGGCAGCCGTCGTC----- morL 21 3
--CCAACCTGGGCAGCCGTCGTC----- morL 19 2
--CCAACCTGGGCAGCCGTCGTC----- morL 22 1
--ACTGGGCAGCCGTCGTC----- morL 18 1
ATCCAACCTGGGCAGCCGTCGTC----- morL 22 1
-----CATCTTACTGGGCAGCATTGGA----- mirL 22 7692
-----CATCTTACTGGGCAGCATTGG----- mirL 21 1678
-----CATCTTACTGGGCAGCATTGGAT----- mirL 23 482
-----ATCTTACTGGGCAGCATTGGA----- mirL 21 255
-----CATCTTACTGGGCAGCATTG----- mirL 20 232
-----CATCTTACTGGGCAGCATTGGATA----- mirL 24 115
-----CATCTTACTGGGCAGCATTGGATAG----- mirL 25 82
-----ATCTTACTGGGCAGCATTGGAT----- mirL 22 71
-----CATCTTACTGGGCAGCATT----- mirL 19 36
-----ATCTTACTGGGCAGCATTGG----- mirL 20 32
-----ATCTTACTGGGCAGCATTG----- mirL 19 16
-----CCATCTTACTGGGCAGCATTGGA----- mirL 23 10
-----TCTTACTGGGCAGCATTGGA----- mirL 20 5
-----TCTTACTGGGCAGCATTG----- mirL 18 5
-----ATCTTACTGGGCAGCATTGGATAG----- mirL 24 3
-----ATCTTACTGGGCAGCATTGGATA----- mirL 23 3
-----ATCTTACTGGGCAGCATTGGATAGT----- mirL 25 2
-----CCATCTTACTGGGCAGCATTGG----- mirL 22 1
-----TCTTACTGGGCAGCATTGG----- mirL 19 1
-----CTTACTGGGCAGCATTGGATAG----- mirL 22 1
-----GATAGTGTCTGATCTCTA----- loop 18 3

```

```
-----GATAGTGTCTGATCTCTAA----- loop 19 2
-----GGATAGTGTCTGATCTCT----- loop 18 1
-----ATAGTGTCTGATCTCTAA----- loop 18 1
-----GGATAGTGTCTGATCTCTA----- loop 19 1
-----TAATACTGCCTGGTAATGATGA----- mirR 22 9038
-----TAATACTGCCTGGTAATGATGAC----- mirR 23 5950
-----TAATACTGCCTGGTAATGATGACG----- mirR 24 2436
-----CTCTAATACTGCCTGGTAATGATG----- mirR 24 1490
-----TAATACTGCCTGGTAATGATG----- mirR 21 1308
-----AATACTGCCTGGTAATGATGA----- mirR 21 970
-----AATACTGCCTGGTAATGATGAC----- mirR 22 683
-----AATACTGCCTGGTAATGATGACG----- mirR 23 409
-----CTCTAATACTGCCTGGTAATGA----- mirR 22 257
-----TAATACTGCCTGGTAATGATGACGG----- mirR 25 172
-----AATACTGCCTGGTAATGATG----- mirR 20 140
-----CTCTAATACTGCCTGGTAATG----- mirR 21 133
-----CTCTAATACTGCCTGGTAATGAT----- mirR 23 116
-----TAATACTGCCTGGTAATGATGACGGC----- mirR 26 101
-----TAATACTGCCTGGTAATGAT----- mirR 20 89
-----TCTAATACTGCCTGGTAATGATG----- mirR 23 36
-----CTCTAATACTGCCTGGTAAT----- mirR 20 30
-----AATACTGCCTGGTAATGATGACGGC----- mirR 25 25
-----AATACTGCCTGGTAATGATGACGG----- mirR 24 24
-----ATACTGCCTGGTAATGATGA----- mirR 20 19
-----AATACTGCCTGGTAATGAT----- mirR 19 18
-----CTCTAATACTGCCTGGTAA----- mirR 19 16
-----ATACTGCCTGGTAATGATGAC----- mirR 21 14
-----CTAATACTGCCTGGTAATGATG----- mirR 22 13
-----ATACTGCCTGGTAATGATGACGG----- mirR 23 12
-----CTAATACTGCCTGGTAATGATGA----- mirR 23 9
-----ATACTGCCTGGTAATGATGACG----- mirR 22 7
-----CTCTAATACTGCCTGGTAATGATGA----- mirR 25 6
-----ATACTGCCTGGTAATGATGACGGC----- mirR 24 5
-----CTAATACTGCCTGGTAATGA----- mirR 20 4
-----TCTAATACTGCCTGGTAATGATGA----- mirR 24 3
-----TCTAATACTGCCTGGTAATGA----- mirR 21 3
-----TACTGCCTGGTAATGATGA----- mirR 19 2
-----TACTGCCTGGTAATGATGACGGC----- mirR 23 2
-----TACTGCCTGGTAATGATGACG----- mirR 21 1
-----TACTGCCTGGTAATGATGAC----- mirR 20 1
-----CTAATACTGCCTGGTAATGAT----- mirR 21 1
-----TCTAATACTGCCTGGTAAT----- mirR 19 1
-----CTAATACTGCCTGGTAATGATGAC----- mirR 24 1
-----CGGAGCCCTGCATGCAGCA morR 19 1
```

>mmu-mir-500

| Sequence                                                                                                                | species | len | reads |
|-------------------------------------------------------------------------------------------------------------------------|---------|-----|-------|
| TTCTCCTCTGCTCCCCCTCTCTAATCCTTGCTATCTGGGTGCTTAGTGCTATCTCAATGCAATGCACCTGGGCAAGGGTTTCAGAGAAGGTGAGCTCATCTGCATCAAGAAGGACCAGA | morL    | 19  | 32    |
| ---TCCTCTGCTCCCCCTCTCT---                                                                                               | morL    | 20  | 28    |
| --CTCCTCTGCTCCCCCTCTCT--                                                                                                | morL    | 18  | 24    |
| ---CCTCTGCTCCCCCTCTCT---                                                                                                | morL    | 21  | 9     |
| -TCTCCTCTGCTCCCCCTCTCT-                                                                                                 | morL    | 18  | 8     |
| ---TCCTCTGCTCCCCCTCTCT---                                                                                               | morL    | 18  | 4     |
| ----CTCTGCTCCCCCTCTCTA-                                                                                                 | morL    | 20  | 4     |
| -----TCTGCTCCCCCTCTCTAATC-                                                                                              | morL    | 21  | 2     |
| --CTCCTCTGCTCCCCCTCTCTA-                                                                                                | morL    | 20  | 2     |
| ---TCCTCTGCTCCCCCTCTCTA-                                                                                                | morL    | 21  | 2     |
| TTCTCCTCTGCTCCCCCTCTCTC---                                                                                              | morL    | 19  | 2     |
| ---CCTCTGCTCCCCCTCTCTA-                                                                                                 | morL    | 18  | 1     |
| ----CTGCTCCCCCTCTCTAAT-                                                                                                 | morL    | 20  | 1     |
| -TCTCCTCTGCTCCCCCTCTCT-                                                                                                 | morL    | 18  | 1     |
| --CTCCTCTGCTCCCCCTCTCT-                                                                                                 | morL    | 21  | 1     |
| ---TCCTCTGCTCCCCCTCTCTA-                                                                                                | mirL    | 21  | 1072  |
| -----ATCCTTGCTATCTGGGTGCTT-                                                                                             | mirL    | 25  | 204   |
| -----AATCCTTGCTATCTGGGTGCTTAGT                                                                                          | mirL    | 24  | 185   |
| -----AATCCTTGCTATCTGGGTGCTTAG                                                                                           | mirL    | 27  | 73    |
| -----AATCCTTGCTATCTGGGTGCTTAGTGC-                                                                                       | mirL    | 23  | 72    |
| -----AATCCTTGCTATCTGGGTGCTTA-                                                                                           | mirL    | 20  | 42    |
| -----ATCCTTGCTATCTGGGTGCT-                                                                                              | mirL    | 19  | 30    |
| -----ATCCTTGCTATCTGGGTGCT-                                                                                              | mirL    | 26  | 29    |
| -----AATCCTTGCTATCTGGGTGCTTAGTG                                                                                         | mirL    | 22  | 29    |
| -----AATCCTTGCTATCTGGGTGCTT-                                                                                            | mirL    | 21  | 23    |
| -----AATCCTTGCTATCTGGGTGCT-                                                                                             | mirL    | 19  | 17    |
| -----CCTTGCTATCTGGGTGCTT-                                                                                               | mirL    | 18  | 17    |
| -----ATCCTTGCTATCTGGGTG                                                                                                 | mirL    | 23  | 15    |
| -----TAATCCTTGCTATCTGGGTGCTT-                                                                                           | mirL    | 20  | 13    |
| -----TCCTTGCTATCTGGGTGCTT-                                                                                              | mirL    | 18  | 12    |
| -----CTTGCTATCTGGGTGCTT-                                                                                                | mirL    | 25  | 11    |
| -----TAATCCTTGCTATCTGGGTGCTTAG                                                                                          | mirL    | 21  | 7     |
| -----TAATCCTTGCTATCTGGGTGCT-                                                                                            | mirL    | 20  | 5     |
| -----TAATCCTTGCTATCTGGGTG                                                                                               | mirL    | 22  | 5     |
| -----ATCCTTGCTATCTGGGTGCTTA-                                                                                            | mirL    | 18  | 3     |
| -----TAATCCTTGCTATCTGGG-                                                                                                | mirL    | 19  | 2     |
| -----TCCTTGCTATCTGGGTGCT-                                                                                               | mirL    | 26  | 2     |
| -----TAATCCTTGCTATCTGGGTGCTTAGT                                                                                         | mirL    | 24  | 2     |
| -----TAATCCTTGCTATCTGGGTGCTTA-                                                                                          | mirL    | 18  | 1     |
| -----TCCTTGCTATCTGGGTGCT                                                                                                | mirL    | 22  | 1     |
| -----TCCTTGCTATCTGGGTGCTTAG                                                                                             | loop    | 18  | 7     |
| -----CTTAGTGCTATCTCAATG                                                                                                 | mirR    | 22  | 11899 |
| -----AATGCACCTGGGCAAGGGTTCA-                                                                                            | mirR    | 21  | 10987 |
| -----AATGCACCTGGGCAAGGGTTTC                                                                                             | mirR    | 23  | 2677  |
| -----AATGCACCTGGGCAAGGGTTTCAG                                                                                           | mirR    | 22  | 1840  |
| -----ATGCACCTGGGCAAGGGTTTCAG                                                                                            |         |     |       |

```

-----AATGCACCTGGGCAAGGGTT----- mirR 20 1571
-----AATGCACCTGGGCAAGGGTTCAGA----- mirR 24 1535
-----ATGCACCTGGGCAAGGGTTCA----- mirR 21 520
-----AATGCACCTGGGCAAGGGTTCAGAG----- mirR 25 310
-----ATGCACCTGGGCAAGGGTTC----- mirR 20 206
-----AATGCACCTGGGCAAGGGTTCAGAGA----- mirR 26 172
-----TGCACCTGGGCAAGGGTTCAG----- mirR 21 89
-----ATGCACCTGGGCAAGGGTT----- mirR 19 37
-----GCACCTGGGCAAGGGTTCAG----- mirR 20 36
-----ATGCACCTGGGCAAGGGT----- mirR 18 30
-----GCACCTGGGCAAGGGTTC----- mirR 19 24
-----ATGCACCTGGGCAAGGGTTCAGA----- mirR 23 14
-----CAATGCACCTGGGCAAGGGTTC----- mirR 23 12
-----TGCACCTGGGCAAGGGTTCAGA----- mirR 22 12
-----TGCACCTGGGCAAGGGTTC----- mirR 20 11
-----CAATGCACCTGGGCAAGGGTTC----- mirR 22 11
-----GCACCTGGGCAAGGGTTC----- mirR 18 3
-----TGCACCTGGGCAAGGGTTC----- mirR 19 3
-----CAATGCACCTGGGCAAGGGTTCAG----- mirR 24 3
-----TGCACCTGGGCAAGGGTTCAGAG----- mirR 23 2
-----CAATGCACCTGGGCAAGGGTT----- mirR 21 2
-----GCAATGCACCTGGGCAAG----- mirR 18 1
-----CAATGCACCTGGGCAAGGGTTCAGA----- mirR 25 1
-----AGAAGGTGAGCTCATCTGCA----- morR 20 10
-----AGAAGGTGAGCTCATCTGCATCAAGAA----- morR 27 9
-----AGAAGGTGAGCTCATCTGCAT----- morR 21 5
-----AGAAGGTGAGCTCATCTGCATC----- morR 22 4
-----GAGAAGGTGAGCTCATCTG----- morR 19 1
-----AGAAGGTGAGCTCATCTGCATCAAGAAGGACCAGA morR 35 1
-----AGAAGGTGAGCTCATCTGCATCAAGAAGGAC---- morR 31 1
-----AGAAGGTGAGCTCATCTGCATCAAGAAGGACC--- morR 32 1

```

>mmu-mir-370

```

GGGGCCTAAGACGGAGAGACCAGGTCACGTCTCTGCAGTTACACAGCTCATGAGTGCCTGCTGGGGTGAACCTGGTTGTCTGTCTGTCTGTCACCATC species len reads
GGGGCCTAAGACGGAGAGAC----- morL 20 56
-GGGCCTAAGACGGAGAGAC----- morL 19 19
GGGGCCTAAGACGGAGAGACC----- morL 21 6
-GGGCCTAAGACGGAGAGACC----- morL 20 6
--GGCCTAAGACGGAGAGAC----- morL 18 5
-GGGCCTAAGACGGAGAGAG----- morL 18 5
GGGGCCTAAGACGGAGAGAG----- morL 19 3
GGGGCCTAAGACGGAGAG----- morL 18 2
---GCCTAAGACGGAGAGACC----- morL 18 2
--GGCCTAAGACGGAGAGACC----- morL 19 1
-----CAGGTCACGTCTCTGCAGTTACAC----- mirL 24 106
-----CCAGGTCACGTCTCTGCAGTT----- mirL 21 72

```



```
-----CAGGTCACGTCTCTGCAGTTACA----- mirL 23 63
-----CCAGGTCACGTCTCTGCAGTTA----- mirL 22 55
-----CAGGTCACGTCTCTGCAGTTAC----- mirL 22 55
-----CCAGGTCACGTCTCTGCAGTTACA----- mirL 24 39
-----CCAGGTCACGTCTCTGCAGTTACACA----- mirL 26 36
-----CAGGTCACGTCTCTGCAGTTA----- mirL 21 33
-----CCAGGTCACGTCTCTGCAGTTAC----- mirL 23 27
-----CCAGGTCACGTCTCTGCAGTTACAC----- mirL 25 24
-----CAGGTCACGTCTCTGCAGTT----- mirL 20 13
-----CAGGTCACGTCTCTGCAGT----- mirL 19 5
-----CAGGTCACGTCTCTGCAG----- mirL 18 5
-----CCAGGTCACGTCTCTGCAG----- mirL 19 4
-----AGGTCACGTCTCTGCAGT----- mirL 18 4
-----GACCAGGTCACGTCTCTG----- mirL 18 3
-----ACCAGGTCACGTCTCTGC----- mirL 18 2
-----GACCAGGTCACGTCTCTGC----- mirL 19 1
-----GTCACGTCTCTGCAGTTA----- mirL 18 1
-----GGTCACGTCTCTGCAGTTACAC----- mirL 22 1
-----GACCAGGTCACGTCTCTGCA----- mirL 20 1
-----GCCTGCTGGGGTGGAACTGGT----- mirR 22 15085
-----GCCTGCTGGGGTGGAACTGGTTT----- mirR 24 5589
-----GCCTGCTGGGGTGGAACTGGTT----- mirR 23 5229
-----GCCTGCTGGGGTGGAACTGG----- mirR 21 2537
-----GCCTGCTGGGGTGGAACTGGTTG----- mirR 25 1401
-----CCTGCTGGGGTGGAACTGGTT----- mirR 22 642
-----CCTGCTGGGGTGGAACTGGTTT----- mirR 23 481
-----GCCTGCTGGGGTGGAACTG----- mirR 20 440
-----CCTGCTGGGGTGGAACTGGT----- mirR 21 234
-----TGCCTGCTGGGGTGGAACTGGT----- mirR 23 215
-----CCTGCTGGGGTGGAACTGGTTG----- mirR 24 210
-----GCCTGCTGGGGTGGAACTGGTTGT----- mirR 26 153
-----TGCCTGCTGGGGTGGAACTGGTTT----- mirR 25 151
-----TGCCTGCTGGGGTGGAACTGGTT----- mirR 24 86
-----CCTGCTGGGGTGGAACTGG----- mirR 20 66
-----TGCCTGCTGGGGTGGAACTGG----- mirR 22 54
-----TGCCTGCTGGGGTGGAACTGGTTG----- mirR 26 49
-----CTGCTGGGGTGGAACTGGTT----- mirR 21 32
-----CCTGCTGGGGTGGAACTGGTTGTC----- mirR 26 23
-----CTGCTGGGGTGGAACTGGTTT----- mirR 22 23
-----TGCCTGCTGGGGTGGAACTGGTTGT----- mirR 27 16
-----TGCCTGCTGGGGTGGAACTG----- mirR 21 16
-----CTGCTGGGGTGGAACTGGTTG----- mirR 23 13
-----CCTGCTGGGGTGGAACTGGTTGT----- mirR 25 13
-----CTGCTGGGGTGGAACTG----- mirR 18 6
-----CTGCTGGGGTGGAACTGGT----- mirR 20 6
-----TGCTGGGGTGGAACTGGT----- mirR 19 5
```

```

-----CTGCTGGGGTGGAACTGGTTTGT----- mirR 24 4
-----CTGCTGGGGTGGAACTGGTTTGT----- mirR 25 3
-----TGCTGGGGTGGAACTGG----- mirR 18 3
-----GTGCCTGCTGGGGTGGAACTGGT----- mirR 24 1
-----TGCTGGGGTGGAACTGGTTTGT----- mirR 23 1
-----AGTGCCTGCTGGGGTGGAA----- mirR 18 1
-----TGCTGTCTGTCTGTCTGCAC---- morR 18 54
-----GTTTGTCTGTCTGTCTGTCA---- morR 20 46
-----TTTGTCTGTCTGTCTGTCA---- morR 19 30
-----TTGTCTGTCTGTCTGTCA---- morR 18 15
-----TCTGTCTGTCTGTCTGCACCA-- morR 18 10
-----TGCTGTCTGTCTGTCTGCACC-- morR 19 8
-----GGTTTGTCTGTCTGTCTG----- morR 18 7
-----TTTGTCTGTCTGTCTGTCTGTC---- morR 18 6
-----GTTTGTCTGTCTGTCTGT----- morR 18 3
-----TTGTCTGTCTGTCTGTCTGCAC---- morR 19 3
-----TTGTCTGTCTGTCTGTCTGCACCA-- morR 21 2
-----GTCTGTCTGTCTGTCTGCACC-- morR 18 2
-----GTCTGTCTGTCTGTCTGCACCA-- morR 19 2
-----TCTGTCTGTCTGTCTGCACCAT- morR 19 1
-----TCTGTCTGTCTGTCTGCACCATC morR 20 1
-----TGTCTGTCTGTCTGTCTGCACCA-- morR 20 1
-----TTTGTCTGTCTGTCTGTCTGCAC---- morR 20 1
-----GGTTTGTCTGTCTGTCTGTCTGCAC---- morR 21 1
-----GTTTGTCTGTCTGTCTGTCTGTC---- morR 19 1

```

>mmu-mir-340

```

ACCAATTGTA...TTATAAAGCAATGAGACTGATTGTCATATGTCGTTTGTGGGATCCGTCTCAGTTACTTTATAGCCATACCTGGTATCTTAACACCACAGATCATGC species len reads
-CCAATTGTA...TTATAAAGCAATGAGACTGAT----- morL 19 2
--CAATTGTA...TTATAAAGCAATGAGACTGAT----- morL 18 1
ACCAATTGTA...TTATAAAGCAATGAGACTGATT----- mirL 22 1215
-----TTATAAAGCAATGAGACTGAT----- mirL 21 308
-----TATAAAGCAATGAGACTGATT----- mirL 21 153
-----TTATAAAGCAATGAGACTGA----- mirL 20 122
-----TTATAAAGCAATGAGACTGATTG----- mirL 23 120
-----ATTATAAAGCAATGAGACTGA----- mirL 21 91
-----ATTATAAAGCAATGAGACTGAT----- mirL 22 43
-----TATAAAGCAATGAGACTGAT----- mirL 20 26
-----TTATAAAGCAATGAGACT----- mirL 18 25
-----TATAAAGCAATGAGACTGATTG----- mirL 22 23
-----TTATAAAGCAATGAGACTG----- mirL 19 22
-----TATAAAGCAATGAGACTGA----- mirL 19 14
-----TTATAAAGCAATGAGACTGATTGT----- mirL 24 9
-----ATAAAGCAATGAGACTGATT----- mirL 20 6
-----TATAAAGCAATGAGACTGATTGT----- mirL 23 4

```

```

-----TAAAGCAATGAGACTGATT----- mirL 19 4
-----ATTATAAAGCAATGAGACTGATT----- mirL 23 3
-----ATAAAGCAATGAGACTGA----- mirL 18 2
-----TATAAAGCAATGAGACTG----- mirL 18 2
-----ATTATAAAGCAATGAGACTG----- mirL 20 1
-----ATAAAGCAATGAGACTGATTG----- mirL 21 1
-----GTCATATGTCGTTTGTGGGAT----- loop 21 3
-----GTCATATGTCGTTTGTGGGA----- loop 20 2
-----TGTCATATGTCGTTTGTGGGATC----- loop 23 1
-----TCCGTCTCAGTACTTTATAGCC----- mirR 23 10773
-----TCCGTCTCAGTACTTTATAGCCA----- mirR 24 8177
-----TCCGTCTCAGTACTTTATAGCCAT----- mirR 25 6056
-----TCCGTCTCAGTACTTTATAGC----- mirR 22 3094
-----TCCGTCTCAGTACTTTATAG----- mirR 21 603
-----TCCGTCTCAGTACTTTATA----- mirR 20 418
-----CCGTCTCAGTACTTTATAGCC----- mirR 22 409
-----CCGTCTCAGTACTTTATAGCCA----- mirR 23 215
-----CGTCTCAGTACTTTATAGCCA----- mirR 22 143
-----TCCGTCTCAGTACTTTAT----- mirR 19 98
-----CGTCTCAGTACTTTATAGCCAT----- mirR 23 97
-----CCGTCTCAGTACTTTATAGCCAT----- mirR 24 94
-----CCGTCTCAGTACTTTATAGC----- mirR 21 72
-----GTCTCAGTACTTTATAGCCA----- mirR 21 51
-----CGTCTCAGTACTTTATAGCC----- mirR 21 48
-----ATCCGTCTCAGTACTTTATAGCC----- mirR 24 46
-----GTCTCAGTACTTTATAGCCAT----- mirR 22 45
-----ATCCGTCTCAGTACTTT----- mirR 18 29
-----ATCCGTCTCAGTACTTTATAGCCA----- mirR 25 21
-----GTCTCAGTACTTTATAGCC----- mirR 20 13
-----CCGTCTCAGTACTTTAT----- mirR 18 9
-----ATCCGTCTCAGTACTTTATAG----- mirR 22 9
-----ATCCGTCTCAGTACTTTATAGC----- mirR 23 8
-----CGTCTCAGTACTTTATAGC----- mirR 20 6
-----CCGTCTCAGTACTTTATAG----- mirR 20 4
-----CGTCTCAGTACTTTATAGCCATA----- mirR 24 3
-----ATCCGTCTCAGTACTTTAT----- mirR 20 2
-----GTCTCAGTACTTTATAGCCATA----- mirR 23 1
-----CGTCTCAGTACTTTATAGCCATAC----- mirR 25 1
-----GATCCGTCTCAGTACTT----- mirR 18 1
-----GATCCGTCTCAGTACTTT----- mirR 19 1
-----CCGTCTCAGTACTTTATAGCCATA----- mirR 25 1
-----GTCTCAGTACTTTATAGC----- mirR 19 1
-----GGATCCGTCTCAGTACT----- mirR 18 1
-----ATACCTGGTATCTTAACACCAGATCATG----- morR 30 21
-----ACCTGGTATCTTAACACC----- morR 18 2
-----CCTGGTATCTTAACACC----- morR 19 1

```

-----CCTGGTATCTTAACACCA----- morR 18 1  
 -----ATACCTGGTATCTTAACACCACAGATCATGC morR 31 1

>mmu-mir-376a

| Species | len | reads |
|---------|-----|-------|
| morL    | 18  | 2     |
| morL    | 19  | 1     |
| morL    | 18  | 1     |
| mirL    | 22  | 2991  |
| mirL    | 23  | 897   |
| mirL    | 22  | 894   |
| mirL    | 20  | 657   |
| mirL    | 21  | 473   |
| mirL    | 21  | 279   |
| mirL    | 24  | 162   |
| mirL    | 22  | 104   |
| mirL    | 23  | 103   |
| mirL    | 19  | 98    |
| mirL    | 23  | 79    |
| mirL    | 20  | 28    |
| mirL    | 24  | 21    |
| mirL    | 19  | 17    |
| mirL    | 21  | 16    |
| mirL    | 19  | 15    |
| mirL    | 24  | 14    |
| mirL    | 18  | 13    |
| mirL    | 21  | 13    |
| mirL    | 18  | 11    |
| mirL    | 20  | 10    |
| mirL    | 18  | 7     |
| mirL    | 21  | 4     |
| mirL    | 23  | 4     |
| mirL    | 20  | 2     |
| mirL    | 18  | 2     |
| mirL    | 25  | 2     |
| mirL    | 20  | 1     |
| mirL    | 25  | 1     |
| mirL    | 19  | 1     |
| mirL    | 20  | 1     |
| mirL    | 19  | 1     |
| loop    | 18  | 2     |
| mirR    | 21  | 14849 |
| mirR    | 22  | 5305  |
| mirR    | 20  | 3381  |
| mirR    | 19  | 507   |
| mirR    | 18  | 462   |

```

-----ATCGTAGAGGAAAATCCACGTTT----- mirR 23 450
-----AATCGTAGAGGAAAATCCACGT----- mirR 22 256
-----CGTAGAGGAAAATCCACGT----- mirR 19 156
-----TCGTAGAGGAAAATCCACG----- mirR 19 116
-----CGTAGAGGAAAATCCACG----- mirR 18 70
-----ATCGTAGAGGAAAATCCACGTTT----- mirR 24 56
-----AATCGTAGAGGAAAATCCACG----- mirR 21 30
-----TCGTAGAGGAAAATCCACGT----- mirR 20 20
-----CGTAGAGGAAAATCCACGTT----- mirR 20 16
-----TCGTAGAGGAAAATCCAC----- mirR 18 14
-----AATCGTAGAGGAAAATCCACGTT----- mirR 23 13
-----GTAGAGGAAAATCCACGT----- mirR 18 9
-----AATCGTAGAGGAAAATCCAC----- mirR 20 8
-----CGTAGAGGAAAATCCACGTT----- mirR 21 6
-----GTAGAGGAAAATCCACGTT----- mirR 19 3
-----TCGTAGAGGAAAATCCACGTT----- mirR 22 2
-----CTAATCGTAGAGGAAAAT----- mirR 18 2
-----AATCGTAGAGGAAAATCCA----- mirR 19 1
-----CTAATCGTAGAGGAAAATC----- mirR 19 1
-----TTTCAGTATCAAATGCTGCTT morR 21 2
-----CAGTATCAAATGCTGCTT morR 18 1

```

>mmu-mir-485

```

TCTTCGCCAGTGATCATGTGTGATACTGGAGAGAGGCTGGCCGTGATGAATTCGATTCATCTAAACGAGTCATACACGGCTCTCCTCTCTTCTAGTGTCAAACCTCTGCCTCAGAGGCTTTCTC species len re
-----TCATGTGTGATACTTGGAG----- morL 19 266
-----CATGTGTGATACTTGGAG----- morL 18 210
-----ATCATGTGTGATACTTGGAG----- morL 20 50
-----TCATGTGTGATACTTGGAGA----- morL 20 23
-----GTGATCATGTGTGATACTTGG----- morL 21 19
-----CATGTGTGATACTTGGAGA----- morL 19 15
-----TGATCATGTGTGATACTTGGAG----- morL 22 10
-----GATCATGTGTGATACTTGG----- morL 19 10
-----ATCATGTGTGATACTTGG----- morL 18 9
-----GATCATGTGTGATACTTGGAG----- morL 21 8
TCTTCGCCAGTGATCATGTGTGATACTTGGAG----- morL 32 8
---TCGCCAGTGATCATGTGTGATACTTGGAG----- morL 29 7
-----TCATGTGTGATACTTGGAGAG----- morL 21 7
-----CAGTGATCATGTGTGATACTTGG----- morL 23 6
-----CATGTGTGATACTTGGAGAG----- morL 20 6
-----TCATGTGTGATACTTGGGA----- morL 18 3
-----ATCATGTGTGATACTTGGGA----- morL 19 2
-----CATGTGTGATACTTGGAGAGA----- morL 21 1
-----ATCATGTGTGATACTTGGAGA----- morL 21 1
-----ATGTGTGATACTTGGAGAG----- morL 19 1
-----ATGTGTGATACTTGGAGA----- morL 18 1
-----TGATCATGTGTGATACTTGGGA----- morL 21 1

```

|                                        |      |    |      |
|----------------------------------------|------|----|------|
| -----GTGATCATGTGTGATACTTGGAGA-----     | morL | 24 | 1    |
| -----TGATCATGTGTGATACTTGG-----         | morL | 20 | 1    |
| -----TGTGTGATACTTGGAGAG-----           | morL | 18 | 1    |
| -----AGAGGCTGGCCGTGATGAATTC-----       | mirL | 23 | 150  |
| -----AGAGGCTGGCCGTGATGAATTC-----       | mirL | 22 | 113  |
| -----AGAGGCTGGCCGTGATGAATT-----        | mirL | 21 | 58   |
| -----AGAGGCTGGCCGTGATGAATTCGA-----     | mirL | 24 | 38   |
| -----AGGCTGGCCGTGATGAATTCGA-----       | mirL | 22 | 38   |
| -----AGGCTGGCCGTGATGAATTCGAT-----      | mirL | 23 | 38   |
| -----AGGCTGGCCGTGATGAATTC-----         | mirL | 20 | 31   |
| -----GAGGCTGGCCGTGATGAATTC-----        | mirL | 21 | 30   |
| -----AGGCTGGCCGTGATGAATTCGATT-----     | mirL | 24 | 29   |
| -----GAGGCTGGCCGTGATGAATT-----         | mirL | 20 | 24   |
| -----AGGCTGGCCGTGATGAATTCGATTC-----    | mirL | 25 | 19   |
| -----GGCTGGCCGTGATGAATT-----           | mirL | 18 | 12   |
| -----AGAGGCTGGCCGTGATGAAT-----         | mirL | 20 | 12   |
| -----AGAGAGGCTGGCCGTGATGAA-----        | mirL | 21 | 11   |
| -----AGGCTGGCCGTGATGAATT-----          | mirL | 19 | 9    |
| -----AGAGAGGCTGGCCGTGATGAAT-----       | mirL | 22 | 9    |
| -----AGAGAGGCTGGCCGTGATGAATT-----      | mirL | 23 | 8    |
| -----AGGCTGGCCGTGATGAAT-----           | mirL | 18 | 7    |
| -----GGCTGGCCGTGATGAATTC-----          | mirL | 19 | 7    |
| -----AGAGGCTGGCCGTGATGAATTCGAT-----    | mirL | 25 | 6    |
| -----AGAGAGGCTGGCCGTGATGA-----         | mirL | 20 | 4    |
| -----AGAGAGGCTGGCCGTGATGAATTC-----     | mirL | 24 | 4    |
| -----AGAGGCTGGCCGTGATGAATTCGATTC-----  | mirL | 27 | 4    |
| -----GAGGCTGGCCGTGATGAAT-----          | mirL | 19 | 4    |
| -----AGAGAGGCTGGCCGTGATGAATTCG-----    | mirL | 25 | 4    |
| -----AGAGAGGCTGGCCGTGATGAATTCGATT----- | mirL | 28 | 2    |
| -----GAGAGGCTGGCCGTGATGAATT-----       | mirL | 22 | 2    |
| -----GGCTGGCCGTGATGAATTCGA-----        | mirL | 21 | 1    |
| -----GAGAGGCTGGCCGTGATG-----           | mirL | 18 | 1    |
| -----GGCTGGCCGTGATGAATTCGAT-----       | mirL | 22 | 1    |
| -----TCGATTTCATCTAAACGAG-----          | loop | 18 | 4    |
| -----CATACACGGCTCTCCTCTCTTC-----       | mirR | 22 | 6849 |
| -----GTCATACACGGCTCTCCTCTCT-----       | mirR | 22 | 6446 |
| -----AGTCATACACGGCTCTCCTCTCT-----      | mirR | 23 | 4306 |
| -----GTCATACACGGCTCTCCTCT-----         | mirR | 20 | 2084 |
| -----AGTCATACACGGCTCTCCTCTC-----       | mirR | 22 | 1792 |
| -----AGTCATACACGGCTCTCCTCTCTTC-----    | mirR | 25 | 1453 |
| -----CATACACGGCTCTCCTCTCTTCT-----      | mirR | 23 | 1166 |
| -----AGTCATACACGGCTCTCCTCTCTT-----     | mirR | 24 | 1121 |
| -----AGTCATACACGGCTCTCCTCTCTTCT-----   | mirR | 26 | 773  |
| -----GTCATACACGGCTCTCCTCTCTTC-----     | mirR | 24 | 707  |
| -----TCATACACGGCTCTCCTCTCTTC-----      | mirR | 23 | 648  |
| -----CATACACGGCTCTCCTCTCTT-----        | mirR | 21 | 634  |

```

-----GTCATACACGGCTCTCCTCTC----- mirR 21 625
-----GTCATACACGGCTCTCCTCTCTT----- mirR 23 501
-----AGTCATACACGGCTCTCCTCT----- mirR 21 464
-----GTCATACACGGCTCTCCTC----- mirR 19 304
-----AGTCATACACGGCTCTCCTCTCTTCTA----- mirR 27 216
-----CATACACGGCTCTCCTCTCTTCTA----- mirR 24 210
-----ATACACGGCTCTCCTCTCTTCT----- mirR 21 170
-----GTCATACACGGCTCTCCTCTCTTCT----- mirR 25 122
-----CATACACGGCTCTCCTCTCT----- mirR 20 98
-----CATACACGGCTCTCCTCTC----- mirR 19 87
-----ATACACGGCTCTCCTCTCTTCT----- mirR 22 60
-----TCATACACGGCTCTCCTCTCTTCT----- mirR 24 59
-----CATACACGGCTCTCCTCT----- mirR 18 40
-----TCATACACGGCTCTCCTCTCTT----- mirR 22 37
-----ATACACGGCTCTCCTCTC----- mirR 18 28
-----TCATACACGGCTCTCCTCTC----- mirR 20 28
-----ATACACGGCTCTCCTCTCT----- mirR 19 28
-----TCATACACGGCTCTCCTCTCT----- mirR 21 22
-----TCATACACGGCTCTCCTCT----- mirR 19 11
-----ATACACGGCTCTCCTCTCTTCTA----- mirR 23 9
-----TACACGGCTCTCCTCTCT----- mirR 18 9
-----TCATACACGGCTCTCCTCTCTTCTA----- mirR 25 6
-----ATACACGGCTCTCCTCTCTT----- mirR 20 5
-----TACACGGCTCTCCTCTCTT----- mirR 20 2
-----ACACGGCTCTCCTCTCTT----- mirR 18 1
-----ACACGGCTCTCCTCTCTTCTA----- mirR 21 1
-----TCTAGTGTCAAACCTCTGCCTCA----- morR 22 33
-----TCTAGTGTCAAACCTCTGCCT----- morR 20 19
-----TAGTGTCAAACCTCTGCCTCA----- morR 20 5
-----TCTAGTGTCAAACCTCTGCCTC----- morR 21 4
-----TCTAGTGTCAAACCTCTGCC----- morR 19 3
-----TCTAGTGTCAAACCTCTGCCTCAGAGGTCTTCTC morR 33 2
-----TCTAGTGTCAAACCTCTGCCTCAG----- morR 23 2
-----CTAGTGTCAAACCTCTGCCTCA----- morR 21 2
-----CTAGTGTCAAACCTCTGCCT----- morR 19 1
-----TCTAGTGTCAAACCTCTGC----- morR 18 1
-----TGTCAAACCTCTGCCTCAG----- morR 18 1
-----GTGTCAAACCTCTGCCTCAG----- morR 19 1

```

>mmu-mir-302c

```

CAGAGTCTGATGGGAGTCCCCTCTGCTTTAACATGGGGTTACCTGCTGTGTTAAACAAAAGCAAGTCTCCATGTTTCAGTGGGGGTGCTTAAACTGTTCAACATTTTCTCTAAG species len reads
-----GTCTGATGGGAGTCCCCTCT----- morL 20 70
-----TCTGATGGGAGTCCCCTCT----- morL 19 70
-----CTGATGGGAGTCCCCTCT----- morL 18 49
-----CTGATGGGAGTCCCCTCTGC----- morL 20 6
-----AGTCTGATGGGAGTCCCCTCT----- morL 21 5

```

```

--GAGTCTGATGGGAGTCCCCTCT----- morL 22 4
---GTCTGATGGGAGTCCCCTC----- morL 19 2
CAGAGTCTGATGGGAGTCCCCTCT----- morL 24 2
----TCTGATGGGAGTCCCCTC----- morL 18 1
-----CTGATGGGAGTCCCCTCTGCTT----- morL 22 1
-----TGATGGGAGTCCCCTCTGCT----- morL 20 1
-----GATGGGAGTCCCCTCTGCT----- morL 19 1
----TCTGATGGGAGTCCCCTCTGC----- morL 21 1
----TGATGGGAGTCCCCTCTGC----- morL 19 1
----TCTGATGGGAGTCCCCTCTG----- morL 20 1
-----GGGAGTCCCCTCTGCTTT----- morL 18 1
----CTGATGGGAGTCCCCTCTG----- morL 19 1
-----TTTAACATGGGGTTACCTGCT----- mirL 21 5096
-----GCTTTAACATGGGGTTACCTGC----- mirL 22 3855
-----TTTAACATGGGGTTACCTGCTG----- mirL 22 1168
-----GCTTTAACATGGGGTTACCTG----- mirL 21 1046
-----GCTTTAACATGGGGTTACCTGCT----- mirL 23 908
-----TTTAACATGGGGTTACCTGC----- mirL 20 613
-----TTAACATGGGGTTACCTGCT----- mirL 20 539
-----TTAACATGGGGTTACCTGCTG----- mirL 21 101
-----TTTAACATGGGGTTACCTGCTGT----- mirL 23 100
-----TTAACATGGGGTTACCTGC----- mirL 19 82
-----TTTAACATGGGGTTACCTG----- mirL 19 47
-----GCTTTAACATGGGGTTACCT----- mirL 20 44
-----CTTTAACATGGGGTTACCTGC----- mirL 21 44
-----GCTTTAACATGGGGTTACCTGCTG----- mirL 24 43
-----TGCTTTAACATGGGGTTACCTGC----- mirL 23 37
-----TGCTTTAACATGGGGTTACCTGCT----- mirL 24 29
-----TTTAACATGGGGTTACCTGCTGTG----- mirL 24 12
-----GCTTTAACATGGGGTTACCT----- mirL 19 12
-----TTAACATGGGGTTACCTGCTGT----- mirL 22 11
-----TTTAACATGGGGTTACCTGCTGTG----- mirL 25 9
-----AACATGGGGTTACCTGCTG----- mirL 19 9
-----GCTTTAACATGGGGTTAC----- mirL 18 8
-----CTTTAACATGGGGTTACCTGCT----- mirL 22 8
-----TGCTTTAACATGGGGTTACCT----- mirL 21 8
-----TAACATGGGGTTACCTGCT----- mirL 19 7
-----TTAACATGGGGTTACCTG----- mirL 18 7
-----CTTTAACATGGGGTTACCTG----- mirL 20 3
-----TAACATGGGGTTACCTGC----- mirL 18 3
-----TTAACATGGGGTTACCTGCTGTG----- mirL 23 2
-----CTTTAACATGGGGTTACCT----- mirL 19 2
-----TAACATGGGGTTACCTGCTG----- mirL 20 2
-----AACATGGGGTTACCTGCT----- mirL 18 1
-----CTGTGTTAAACAAAAGCA----- loop 18 39
-----CTGTGTTAAACAAAAGCAA----- loop 19 2

```



```

-----AAGTGCTTCCATGTTTCAGTGGG----- mirR 23 10157
-----AAGTGCTTCCATGTTTCAGTGGG----- mirR 24 1869
-----AAGTGCTTCCATGTTTCAGTGG----- mirR 22 1782
-----CAAGTGCTTCCATGTTTCAGTGG----- mirR 23 868
-----AAGTGCTTCCATGTTTCAGTG----- mirR 21 554
-----CAAGTGCTTCCATGTTTCAGTG----- mirR 22 551
-----AAGTGCTTCCATGTTTCAGT----- mirR 20 356
-----AGTGCTTCCATGTTTCAGTGG----- mirR 21 351
-----AGTGCTTCCATGTTTCAGTGGG----- mirR 22 301
-----AAGTGCTTCCATGTTTCAGTGGGG----- mirR 25 292
-----CAAGTGCTTCCATGTTTCAGT----- mirR 21 226
-----CAAGTGCTTCCATGTTTCAGTGGG----- mirR 24 221
-----AGTGCTTCCATGTTTCAGTG----- mirR 20 76
-----CAAGTGCTTCCATGTTTCA----- mirR 19 55
-----AGTGCTTCCATGTTTCAGTGGGG----- mirR 23 54
-----AAGTGCTTCCATGTTTCAGTGGGGGT----- mirR 26 42
-----CAAGTGCTTCCATGTTTCAGTGGGG----- mirR 25 38
-----CAAGTGCTTCCATGTTTCAG----- mirR 20 38
-----AGTGCTTCCATGTTTCAGTGGGG----- mirR 24 29
-----AGTGCTTCCATGTTTCAGT----- mirR 19 22
-----GTGCTTCCATGTTTCAGTGG----- mirR 20 14
-----GTGCTTCCATGTTTCAGT----- mirR 18 11
-----TGCTTCCATGTTTCAGTG----- mirR 18 11
-----GCAAGTGCTTCCATGTTTC----- mirR 19 4
-----AGTGCTTCCATGTTTCAG----- mirR 18 4
-----GCAAGTGCTTCCATGTTTCAGTGG----- mirR 24 2
-----GCAAGTGCTTCCATGTTTCA----- mirR 20 2
-----GCAAGTGCTTCCATGTTTCAG----- mirR 21 1
-----GTGCTTCCATGTTTCAGTGGGG----- mirR 22 1
-----GCAAGTGCTTCCATGTTT----- mirR 18 1
-----GCAAGTGCTTCCATGTTTCAGT----- mirR 22 1
-----TGCTTCCATGTTTCAGTGG----- mirR 19 1
-----GTGCTTCCATGTTTCAGTGGG----- mirR 21 1
-----GGGTGTCTTAAACTGTTCAACAT----- morR 23 40
-----GGGTGTCTTAAACTGTTCAACATTT----- morR 25 21
-----GGGTGTCTTAAACTGTTCAACATT----- morR 24 8
-----GGGTGTCTTAAACTGTTCAACATTTTCTCTAA----- morR 32 5
-----GGGTGTCTTAAACTGTTCAACATTTTCTCTA----- morR 31 3
-----GGGTGTCTTAAACTGTTCAA----- morR 20 2
-----GGTGTCTTAAACTGTTCAACAT----- morR 22 1
-----GGGTGTCTTAAACTGTTCAACATTTTCTCTAAG----- morR 33 1
-----TGTCTTAAACTGTTCAAC----- morR 18 1

```

>mmu-mir-1249

```

CCGATTCTTGTTTGCCTGGGGAGGAGGGAGGGGATGGGCCAAGTTCCTATGCCTGGAACGCCCTTCCCCCCTTCTTCACCTGGCGAACTCCTACTCGTCCTTCAAGACCC species len reads
--GATTCTTGTTTGCCTGGGG----- morL 19 2

```

```

CCGATTCTTGTTTGCCTGGGG----- morL 21 1
CCGATTCTTGTTTGCCTGGG----- morL 20 1
-----AGGAGGGAGGGGATGGGCCAAGTTC----- mirL 25 126
-----AGGAGGGAGGGGATGGGCCAAGTT----- mirL 24 66
-----AGGAGGGAGGGGATGGGCCAAGTTC----- mirL 26 40
-----AGGAGGGAGGGGATGGGCCAAGT----- mirL 23 11
-----AGGAGGGAGGGGATGGGCC----- mirL 19 7
-----GGAGGAGGGAGGGGATGG----- mirL 18 6
-----AGGAGGGAGGGGATGGGCCAAGTTCCC----- mirL 27 6
-----AGGAGGGAGGGGATGGGC----- mirL 18 5
-----GAGGGAGGGGATGGGCCA----- mirL 18 2
-----GGAGGAGGGGATGGGCCAA----- mirL 20 2
-----AGGGAGGGGATGGGCCAAGTTCC----- mirL 23 2
-----GAGGAGGGAGGGGATGGG----- mirL 18 2
-----GAGGAGGGAGGGGATGGGC----- mirL 19 1
-----GAGGAGGGAGGGGATGGGCC----- mirL 20 1
-----GGAGGGAGGGGATGGGCCAAGTTCC----- mirL 25 1
-----GGAGGAGGGAGGGGATGGG----- mirL 19 1
-----GGGAGGAGGGAGGGGATG----- mirL 18 1
-----GGAGGAGGGGATGGGCCAAGTT----- mirL 23 1
-----GGAGGAGGGGATGGGCC----- mirL 18 1
-----ACGCCCTTCCCCCCTTCTTCA----- mirR 22 23057
-----ACGCCCTTCCCCCCTTCTTC----- mirR 21 3892
-----ACGCCCTTCCCCCCTTCTTCAC----- mirR 23 1769
-----ACGCCCTTCCCCCCTTCTT----- mirR 20 1399
-----ACGCCCTTCCCCCCTTC----- mirR 18 294
-----ACGCCCTTCCCCCCTTCTTCACC----- mirR 24 269
-----ACGCCCTTCCCCCCTTCT----- mirR 19 231
-----CGCCCTTCCCCCCTTCTTCA----- mirR 21 81
-----AACGCCCTTCCCCCCTTCTTCA----- mirR 23 75
-----AACGCCCTTCCCCCCTTCTT----- mirR 21 43
-----AACGCCCTTCCCCCCTTCTTC----- mirR 22 38
-----CCCTTCCCCCCTTCTTCA----- mirR 19 32
-----AACGCCCTTCCCCCCTTCTTCAC----- mirR 24 8
-----GGAACGCCCTTCCCCCCTTCT----- mirR 22 6
-----AACGCCCTTCCCCCCTTCT----- mirR 20 5
-----AACGCCCTTCCCCCCTT----- mirR 18 4
-----AACGCCCTTCCCCCCTTC----- mirR 19 4
-----GCCCTTCCCCCCTTCTTCA----- mirR 20 4
-----CGCCCTTCCCCCCTTCTT----- mirR 19 4
-----GGAACGCCCTTCCCCCCT----- mirR 18 4
-----GCCCTTCCCCCCTTCTT----- mirR 18 3
-----CCCTTCCCCCCTTCTTC----- mirR 18 2
-----CGCCCTTCCCCCCTTCTTCAC----- mirR 22 2
-----CGCCCTTCCCCCCTTCT----- mirR 18 1
-----GAACGCCCTTCCCCCCT----- mirR 18 1

```

C:\Documents and Settings\hong\Desktop\Reprogramming-total RNA.txt

```
-----CCTGGCGAACTCCTACTCGTCCTTCAAGACC- morR 31 5
-----CCTGGCGAACTCCTACTCGTCCTTCAAGACCC morR 32 2
-----ACCTGGCGAACTCCTACTC----- morR 19 1
-----GGCGAACTCCTACTCGTCC----- morR 19 1
-----CACCTGGCGAACTCCTAC----- morR 18 1
```

>mmu-mir-204

```
TCTTCATGTGACTCGTGGACTTCCCTTTGTCATCCTATGCCTGAGAATATATGAAGGAGGCTGGGAAGGCAAAGGGACGTTCAATTGTCATCACTGGCATCTTTTTTGATCATTACACCATCATCAAAAAG species 1
--TTCATGTGACTCGTGGAC----- morL 18 1
TCTTCATGTGACTCGTGG----- morL 18 1
-CTTCATGTGACTCGTGG----- morL 18 1
TCTTCATGTGACTCGTGGACT----- morL 21 1
-----TTCCCTTTGTCATCCTATGCCT----- mirL 22 18
-----TTCCCTTTGTCATCCTATGCCTG----- mirL 23 67
-----TTCCCTTTGTCATCCTATGCCTGA----- mirL 24 26
-----TTCCCTTTGTCATCCTATGCC----- mirL 21 86
-----TTCCCTTTGTCATCCTATGC----- mirL 20 76
-----TCCCTTTGTCATCCTATGCCT----- mirL 21 49
-----TTCCCTTTGTCATCCTATGCCTGAG----- mirL 25 27
-----TTCCCTTTGTCATCCTATG----- mirL 19 17
-----TCCCTTTGTCATCCTATGCCTG----- mirL 22 16
-----CCTTTGTCATCCTATGCCTG----- mirL 20 74
-----TCCCTTTGTCATCCTATGCCTGA----- mirL 23 69
-----CCCTTTGTCATCCTATGCCTG----- mirL 21 55
-----TCCCTTTGTCATCCTATGCC----- mirL 20 38
-----TCCCTTTGTCATCCTATGC----- mirL 19 27
-----CCTTTGTCATCCTATGCCT----- mirL 19 8
-----CTTCCCTTTGTCATCCTATGCCTG----- mirL 24 6
-----CCCTTTGTCATCCTATGCCT----- mirL 20 4
-----TCCCTTTGTCATCCTATGCCTGAGA----- mirL 25 3
-----TCCCTTTGTCATCCTATGCCTGAG----- mirL 24 2
-----CTTCCCTTTGTCATCCTA----- mirL 18 1
-----CCCTTTGTCATCCTATGCC----- mirL 19 1
-----ACTTCCCTTTGTCATCCT----- mirL 18 1
-----TCACTGGCATCTTTTTTG----- mirR 18 56
-----ATCACTGGCATCTTTTTTG----- mirR 19 3
-----TCACTGGCATCTTTTTTGA----- mirR 19 1
-----ATCACTGGCATCTTTTTT----- mirR 18 1
-----ACTGGCATCTTTTTTGAT----- mirR 18 1
-----ATTACACCATCATCAAAA----- morR 18 1
-----ATTACACCATCATCAAAAAG morR 19 1
```

>mmu-mir-1193

```
TGTTCTCGGGGTAGCTGTGTGGATGGTAGACCGGTGACGTACACTTCATTTATGCTGTAGGTCACCCGTTTTACTATCCACCAACACCCAGACCATCTG species len reads
-----TCGGGGTAGCTGTGTGGA----- morL 18 10
---TCTCGGGGTAGCTGTGTG----- morL 18 2
```

```

----CTCGGGGTAGCTGTGTGG----- morL 18 1
-GTTCTCGGGGTAGCTGTGTGGA----- morL 22 1
TGTCTCGGGGTAGCTGTGTGGA----- morL 23 1
-GTTCTCGGGGTAGCTGTGTGGAT----- morL 23 1
-----ATGGTAGACCGGTGACGTACA----- mirL 21 82
-----TGGTAGACCGGTGACGTACA----- mirL 20 54
-----TGGTAGACCGGTGACGTACACT----- mirL 22 25
-----GGATGGTAGACCGGTGACGTAC----- mirL 22 24
-----TGGTAGACCGGTGACGTAC----- mirL 19 14
-----GATGGTAGACCGGTGACGTAC----- mirL 21 13
-----ATGGTAGACCGGTGACGTAC----- mirL 20 11
-----GATGGTAGACCGGTGACGTAC----- mirL 20 7
-----GGTAGACCGGTGACGTACAC----- mirL 20 6
-----GGTAGACCGGTGACGTACA----- mirL 19 6
-----GGATGGTAGACCGGTGACG----- mirL 19 5
-----ATGGTAGACCGGTGACGTACAC----- mirL 22 4
-----ATGGTAGACCGGTGACGT----- mirL 18 4
-----ATGGTAGACCGGTGACGTAC----- mirL 19 3
-----TGGTAGACCGGTGACGTACACTT----- mirL 23 3
-----GGTAGACCGGTGACGTACACT----- mirL 21 3
-----TGGATGGTAGACCGGTGACGTAC----- mirL 22 3
-----GGTAGACCGGTGACGTAC----- mirL 18 2
-----TGGTAGACCGGTGACGTACAC----- mirL 21 2
-----GGATGGTAGACCGGTGAC----- mirL 18 1
-----GTAGACCGGTGACGTACA----- mirL 18 1
-----TGGTAGACCGGTGACGTACACTTCA----- mirL 25 1
-----TGGTAGACCGGTGACGTAC----- mirL 18 1
-----GATGGTAGACCGGTGACGTACA----- mirL 22 1
-----CACTTCATTTATGCTGTA----- loop 18 1
-----TAGGTCACCCGTTTTACTATC----- mirR 21 13595
-----TAGGTCACCCGTTTTACTATCC----- mirR 22 12551
-----TAGGTCACCCGTTTTACTAT----- mirR 20 1856
-----TAGGTCACCCGTTTTACTA----- mirR 19 797
-----TAGGTCACCCGTTTTACTATCCA----- mirR 23 394
-----AGGTCACCCGTTTTACTATCC----- mirR 21 311
-----TAGGTCACCCGTTTTACT----- mirR 18 309
-----TGTAGGTCACCCGTTTTACTATC----- mirR 23 307
-----AGGTCACCCGTTTTACTATC----- mirR 20 289
-----GTAGGTCACCCGTTTTACTATC----- mirR 22 80
-----TAGGTCACCCGTTTTACTATCCAC----- mirR 24 55
-----AGGTCACCCGTTTTACTAT----- mirR 19 52
-----TGTAGGTCACCCGTTTTACTAT----- mirR 22 36
-----GGTCACCCGTTTTACTATC----- mirR 19 22
-----GTCACCCGTTTTACTATC----- mirR 18 22
-----AGGTCACCCGTTTTACTA----- mirR 18 17
-----AGGTCACCCGTTTTACTATCCA----- mirR 22 13

```

```

-----TGTAGGTCACCCGTTTTACT----- mirR 20 12
-----TGTAGGTCACCCGTTTTACTATCC----- mirR 24 8
-----AGGTCACCCGTTTTACTATCCAC----- mirR 23 6
-----GTAGGTCACCCGTTTTACTA----- mirR 20 5
-----GGTCACCCGTTTTACTAT----- mirR 18 4
-----GTAGGTCACCCGTTTTACTAT----- mirR 21 2
-----TGTAGGTCACCCGTTTTACTATCCA----- mirR 25 2
-----GTAGGTCACCCGTTTTACTATCC----- mirR 23 1
-----GTAGGTCACCCGTTTTACT----- mirR 18 1
-----GGTCACCCGTTTTACTATCC----- mirR 20 1
-----TGTAGGTCACCCGTTTTACTA----- mirR 21 1
-----AGGTCACCCGTTTTACTATCCACCA----- mirR 25 1
-----ATCCACCAACACCCAGAC----- morR 18 2
-----CCACCAACACCCAGACCA----- morR 18 1
-----ACCAACACCCAGACCATC----- morR 18 1
-----CAACACCCAGACCATCTG----- morR 18 1
-----CACCAACACCCAGACCATCT----- morR 20 1
-----TCCACCAACACCCAGACC----- morR 18 1

```

>mmu-mir-330

| Species | len | reads |
|---------|-----|-------|
| morL    | 18  | 2     |
| morL    | 20  | 2     |
| morL    | 19  | 2     |
| morL    | 30  | 1     |
| morL    | 18  | 1     |
| morL    | 19  | 1     |
| morL    | 20  | 1     |
| mirL    | 24  | 426   |
| mirL    | 23  | 422   |
| mirL    | 25  | 169   |
| mirL    | 20  | 90    |
| mirL    | 26  | 56    |
| mirL    | 22  | 56    |
| mirL    | 19  | 48    |
| mirL    | 22  | 37    |
| mirL    | 23  | 20    |
| mirL    | 19  | 10    |
| mirL    | 19  | 9     |
| mirL    | 25  | 8     |
| mirL    | 24  | 6     |
| mirL    | 21  | 4     |
| mirL    | 18  | 3     |
| mirL    | 18  | 2     |
| mirL    | 21  | 2     |
| mirL    | 18  | 1     |

```

-----GCCTCTCTGGGCCTGTGTC----- mirL 19 1
-----TCTGGGCCTGTGTCTTAG----- mirL 18 1
-----CTGGGCCTGTGTCTTAGGCT----- mirL 20 1
-----TCTTCAAGATCCAACGAG----- loop 18 2
-----GCAAAGCACAGGGCCTGCAGAGA----- mirR 23 14616
-----CAAAGCACAGGGCCTGCAGAGA----- mirR 22 2216
-----GCAAAGCACAGGGCCTGCAGAGAG----- mirR 25 1956
-----CAAAGCACAGGGCCTGCAGAGAG----- mirR 23 1886
-----GCAAAGCACAGGGCCTGCAGAGAG----- mirR 24 1866
-----CAAAGCACAGGGCCTGCAGAGAG----- mirR 24 1637
-----GCAAAGCACAGGGCCTGCAGAG----- mirR 22 1348
-----GCAAAGCACAGGGCCTGCAGA----- mirR 21 1019
-----CAAAGCACAGGGCCTGCAGAGAGGT----- mirR 25 937
-----GCAAAGCACAGGGCCTGCAGAGAGGT----- mirR 26 630
-----CAAAGCACAGGGCCTGCAGAGAGGTA----- mirR 26 412
-----CAAAGCACAGGGCCTGCAGAG----- mirR 21 311
-----CAAAGCACAGGGCCTGCAGAGAGGTAG----- mirR 27 266
-----GCAAAGCACAGGGCCTGCAGAGAGGTA----- mirR 27 179
-----AAGCACAGGGCCTGCAGAGA----- mirR 20 92
-----AAAGCACAGGGCCTGCAGAGA----- mirR 21 50
-----AGCAAAGCACAGGGCCTGCAGAGA----- mirR 24 21
-----AAAGCACAGGGCCTGCAGAG----- mirR 20 10
-----AAGCACAGGGCCTGCAGA----- mirR 18 8
-----AAAGCACAGGGCCTGCAGAGAG----- mirR 22 8
-----AAGCACAGGGCCTGCAGAG----- mirR 19 8
-----AAAGCACAGGGCCTGCAGAGAGGTAG----- mirR 26 4
-----AGCAAAGCACAGGGCCTGCAGAG----- mirR 23 4
-----AAAGCACAGGGCCTGCAGAGAGG----- mirR 23 3
-----AAAGCACAGGGCCTGCAGAGAGGT----- mirR 24 3
-----AAGCACAGGGCCTGCAGAGAG----- mirR 21 3
-----AAAGCACAGGGCCTGCAG----- mirR 18 2
-----AAGCACAGGGCCTGCAGAGAGGT----- mirR 23 2
-----CGAGCAAAGCACAGGGCCTGCAGAGAGGT----- mirR 29 1
-----AGCAAAGCACAGGGCCTGCAG----- mirR 21 1
-----TAGCGCTCTGCTCCTTACT--- morR 19 20
-----GAGGTAGCGCTCTGCTCCT----- morR 19 1
-----AGGTAGCGCTCTGCTCCT----- morR 18 1
-----TAGCGCTCTGCTCCTTACTCGC morR 22 1
-----AGCGCTCTGCTCCTTACT--- morR 18 1
-----GAGGTAGCGCTCTGCTCC----- morR 18 1
-----AGAGGTAGCGCTCTGCTC----- morR 18 1

```

>mmu-mir-672

```

CTAGCCCTTTAGTTTTGAGGTTGGTGTACTGTGTGTGAGTATACATATTTATCACACACAGTCACTATCTTCGAAAGTGAGGGTGCACATCTTTCTCAGCC species len reads
CTAGCCCTTTAGTTTTGA----- morL 18 1
-----TGAGGTTGGTGTACTGTGTGTGA----- mirL 23 19832

```

```

-----TGAGGTTGGTGTACTGTGTGTG----- mirL 22 3190
-----TGAGGTTGGTGTACTGTGTGT----- mirL 21 1547
-----TGAGGTTGGTGTACTGTGTGTGAG----- mirL 24 1162
-----GAGGTTGGTGTACTGTGTGTGA----- mirL 22 969
-----TGAGGTTGGTGTACTGTGT----- mirL 19 422
-----TGAGGTTGGTGTACTGTGTGTGAGT----- mirL 25 321
-----TGAGGTTGGTGTACTGTGTG----- mirL 20 195
-----GAGGTTGGTGTACTGTGTGTG----- mirL 21 168
-----GGTTGGTGTACTGTGTGTG----- mirL 19 100
-----GAGGTTGGTGTACTGTGTGT----- mirL 20 70
-----GGTTGGTGTACTGTGTGTGA----- mirL 20 62
-----GAGGTTGGTGTACTGTGTGTGAG----- mirL 23 59
-----AGGTTGGTGTACTGTGTGTG----- mirL 20 44
-----AGGTTGGTGTACTGTGTGTGA----- mirL 21 33
-----GAGGTTGGTGTACTGTGTGTGAGT----- mirL 24 20
-----GAGGTTGGTGTACTGTGT----- mirL 18 20
-----GGTTGGTGTACTGTGTGT----- mirL 18 17
-----GAGGTTGGTGTACTGTGTG----- mirL 19 10
-----TTGAGGTTGGTGTACTGTGTGTGA----- mirL 24 5
-----AGGTTGGTGTACTGTGTG----- mirL 18 2
-----AGGTTGGTGTACTGTGTGT----- mirL 19 1
-----AGGTTGGTGTACTGTGTGTGAGT----- mirL 23 1
-----TTGAGGTTGGTGTACTGTGTGT----- mirL 22 1
-----TTGAGGTTGGTGTACTGTGTGTGA----- mirL 25 1
-----TGAGTATACATATTTATC----- loop 18 1
-----GTATACATATTTATCACA----- loop 18 1
-----ACACACAGTCACTATCTTCGA----- mirR 21 1000
-----ACACACAGTCACTATCTTCGAA----- mirR 22 522
-----ACACACAGTCACTATCTTCGAAA----- mirR 23 137
-----ACACACAGTCACTATCTTCG----- mirR 20 20
-----ACACACAGTCACTATCTTC----- mirR 19 15
-----ATCACACACAGTCACTAT----- mirR 18 10
-----ACACACAGTCACTATCTTCGAAAG----- mirR 24 9
-----ACACACAGTCACTATCTTC----- mirR 18 6
-----CACACAGTCACTATCTTC----- mirR 18 2
-----TCACACACAGTCACTATC----- mirR 18 1
-----CACACAGTCACTATCTTCGAAA----- mirR 22 1
-----ATCACACACAGTCACTATC----- mirR 19 1
-----TCACACACAGTCACTATCTTCG----- mirR 22 1
-----CACACACAGTCACTATCTTCGA----- mirR 22 1
-----AAAGTGAGGGTGCACATC----- morR 18 1
-----TGAGGGTGCACATCTTTTC----- morR 18 1
-----TGAGGGTGCACATCTTTCTCAGCC morR 24 1

```

>mmu-mir-665

CTCCCAGAACAGGGTCTCCTTGAGGGGCTCTGCCTCTATCCAGATTATGTTTTTATGACCAGGAGGCTGAGGTCCCTTACAGGCGGCTCTTACTCTCTCC species len reads

```

--CCCAGAACAGGGTCTCCTTG----- morL 20 34
-TCCCAGAACAGGGTCTCCTTG----- morL 21 10
----CAGAACAGGGTCTCCTTG----- morL 18 9
CTCCCAGAACAGGGTCTCCTTG----- morL 22 5
---CCAGAACAGGGTCTCCTTGAGG----- morL 22 1
-TCCCAGAACAGGGTCTCCTC----- morL 18 1
----AGAACAGGGTCTCCTTGA----- morL 18 1
----GAACAGGGTCTCCTTGAGG----- morL 19 1
-----AGGGCCTCTGCCTCTATCC----- mirL 20 35
-----AGGGCCTCTGCCTCTATCCAGGATT----- mirL 26 18
-----AGGGCCTCTGCCTCTATC----- mirL 19 17
-----AGGGCCTCTGCCTCTATCCAGGATTA----- mirL 27 13
-----AGGGCCTCTGCCTCTATCCA----- mirL 21 11
-----AGGGCCTCTGCCTCTATCCAG----- mirL 22 5
-----AGGGCCTCTGCCTCTAT----- mirL 18 2
-----GAGGGCCTCTGCCTCTA----- mirL 18 1
-----AGGATTATGTTTTTATGA----- loop 18 1
-----ACCAGGAGGCTGAGGTCCTTAC----- mirR 23 11748
-----ACCAGGAGGCTGAGGTCCTTA----- mirR 22 9751
-----ACCAGGAGGCTGAGGTCCTT----- mirR 21 1911
-----CCAGGAGGCTGAGGTCCTTAC----- mirR 22 1469
-----CCAGGAGGCTGAGGTCCTTA----- mirR 21 1246
-----ACCAGGAGGCTGAGGTCCTTACA----- mirR 24 1218
-----ACCAGGAGGCTGAGGTCCT----- mirR 20 394
-----CCAGGAGGCTGAGGTCCTTACA----- mirR 23 200
-----ACCAGGAGGCTGAGGTCCTTACAG----- mirR 25 169
-----ACCAGGAGGCTGAGGTCCC----- mirR 19 112
-----CCAGGAGGCTGAGGTCCTT----- mirR 20 87
-----CCAGGAGGCTGAGGTCCT----- mirR 19 21
-----CCAGGAGGCTGAGGTCCTTACAG----- mirR 24 20
-----GACCAGGAGGCTGAGGTCCTTAC----- mirR 24 13
-----GACCAGGAGGCTGAGGTCCTTA----- mirR 23 10
-----CAGGAGGCTGAGGTCCTTAC----- mirR 21 9
-----CCAGGAGGCTGAGGTCCTTACAGG----- mirR 25 8
-----CAGGAGGCTGAGGTCCTTA----- mirR 20 6
-----GACCAGGAGGCTGAGGTCCTT----- mirR 22 3
-----TGACCAGGAGGCTGAGGTCCTTA----- mirR 24 2
-----CAGGAGGCTGAGGTCCTTACA----- mirR 22 1
-----AGGAGGCTGAGGTCCTTACA----- mirR 21 1
-----CAGGAGGCTGAGGTCCTT----- mirR 19 1
-----GACCAGGAGGCTGAGGTCCC----- mirR 20 1
-----GACCAGGAGGCTGAGGTC----- mirR 18 1
-----AGGAGGCTGAGGTCCTTAC----- mirR 20 1
-----TGACCAGGAGGCTGAGGTCCTTAC----- mirR 25 1
-----ACAGGCGGCCTCTTACTC----- morR 18 2
-----GGCGCCTCTTACTCTCTC----- morR 19 1

```



```

-----GCGGCCTCTTACTCTCTCC morR 19 1
-----AGGCGGCCTCTTACTCTC--- morR 18 1

>mmu-mir-668
TAACCAGATTCAAGGCTATCACCATCCCCCTTCAGGTAAGTGTGCCTCGGGTGAGCATGCACTTAATGTAGGTGTATGTCACCTCGGCTCGGCCACTACCCAATGCTGTCCCACCCCTTCTTCAC species len r
-----ATCACCATCCCCCTTCAG----- morL 18 89
-----ATTCAAGGCTATCACCATCCCCCTTCAG----- morL 28 36
-----TATCACCATCCCCCTTCAG----- morL 19 17
-----TCAAGGCTATCACCATCCCCCTTCAG----- morL 26 14
-----TTCAAGGCTATCACCATCCCCCTTCAG----- morL 27 13
-----GGCTATCACCATCCCCCTTCAG----- morL 22 9
-----TTCAAGGCTATCACCATCCCCCTTC----- morL 25 3
-----ATCACCATCCCCCTTCAGG----- morL 19 2
-----GATTCAAGGCTATCACCATCCCCCTTCAG----- morL 29 2
-----TCAAGGCTATCACCATCCCCCTTC----- morL 24 1
-----CAAGGCTATCACCATCCCCCTTC----- morL 23 1
-----TCACCATCCCCCTTCAGGTA----- morL 20 1
-----CACCATCCCCCTTCAGGTA----- morL 19 1
-----CTATCACCATCCCCCTTC----- morL 18 1
-----ATTCAAGGCTATCACCATCCCCCTTCA----- morL 27 1
TAACCAGATTCAAGGCTATCACCATCCCCCTTC----- morL 33 1
-----TCACCATCCCCCTTCAGG----- morL 18 1
-----GTAAGTGTGCCTCGGGTGAGCATGC----- mirL 25 19
-----GTAAGTGTGCCTCGGGTGAGCATG----- mirL 24 17
-----GTAAGTGTGCCTCGGGTGAGCAT----- mirL 23 8
-----GTAAGTGTGCCTCGGGTGAGCATGCA----- mirL 26 8
-----GTAAGTGTGCCTCGGGTG----- mirL 18 3
-----GTAAGTGTGCCTCGGGTG----- mirL 19 3
-----AAGTGTGCCTCGGGTGAGCATGC----- mirL 23 2
AGGTAAGTGTGCCTCGGGT----- mirL 19 2
-----GGTAAGTGTGCCTCGGGTG----- mirL 19 1
-----TAAGTGTGCCTCGGGTGAGCATGC----- mirL 24 1
-----AGTGTGCCTCGGGTGAGCATGC----- mirL 22 1
-----AGTGTGCCTCGGGTGAGC----- mirL 18 1
-----TAAGTGTGCCTCGGGTGAGCATG----- mirL 23 1
-----TAAGTGTGCCTCGGGTGAGCATGCAC----- mirL 26 1
-----CACTTAATGTAGGTGTAT----- loop 18 7
-----ACTTAATGTAGGTGTATGT----- loop 19 1
-----TGTCACCTCGGCTCGGCCACTACC----- mirR 24 10081
-----TGTCACCTCGGCTCGGCCACTAC----- mirR 23 6782
-----TGTCACCTCGGCTCGGCCACTACCC----- mirR 25 3180
-----TGTCACCTCGGCTCGGCCACTA----- mirR 22 2532
-----TGTCACCTCGGCTCGGCCACT----- mirR 21 1014
-----ATGTCACCTCGGCTCGGCCACTAC----- mirR 24 492
-----ATGTCACCTCGGCTCGGCCACTACC----- mirR 25 454
-----TGTCACCTCGGCTCGGCCACTACCA----- mirR 26 399

```

```

-----ATGTCACTCGGCTCGGCCACTACCC----- mirR 26 372
-----TATGTCACTCGGCTCGGCCACTAC----- mirR 25 352
-----TGTCACTCGGCTCGGCCACTACCCAA----- mirR 27 308
-----ATGTCACTCGGCTCGGCCACT----- mirR 22 275
-----GTCACTCGGCTCGGCCACTAC----- mirR 22 267
-----ATGTCACTCGGCTCGGCCACTA----- mirR 23 221
-----TATGTCACTCGGCTCGGCCACT----- mirR 23 212
-----GTCACTCGGCTCGGCCACTACC----- mirR 23 199
-----TATGTCACTCGGCTCGGCCACTA----- mirR 24 145
-----GTCACTCGGCTCGGCCACTACC----- mirR 24 131
-----TATGTCACTCGGCTCGGCCACTACC----- mirR 26 94
-----TATGTCACTCGGCTCGGCCACTACC----- mirR 27 81
-----CACTCGGCTCGGCCACTAC----- mirR 20 60
-----GTCACTCGGCTCGGCCACTA----- mirR 21 58
-----CACTCGGCTCGGCCACTACC----- mirR 21 52
-----TCACTCGGCTCGGCCACTACC----- mirR 22 48
-----TCACTCGGCTCGGCCACTAC----- mirR 21 38
-----TATGTCACTCGGCTCGGCCAC----- mirR 22 36
-----ATGTCACTCGGCTCGGCCACTACCCA----- mirR 27 35
-----ATGTCACTCGGCTCGGCCAC----- mirR 21 29
-----GTCACTCGGCTCGGCCACT----- mirR 20 26
-----TATGTCACTCGGCTCGGCCA----- mirR 21 19
-----GTCACTCGGCTCGGCCAC----- mirR 19 13
-----GTCACTCGGCTCGGCCACTACCCA----- mirR 25 13
-----TCACTCGGCTCGGCCACTA----- mirR 20 8
-----TCACTCGGCTCGGCCACT----- mirR 19 6
-----CACTCGGCTCGGCCACTA----- mirR 19 5
-----CACTCGGCTCGGCCACT----- mirR 18 3
-----CACTCGGCTCGGCCACTACC----- mirR 22 2
-----GTATGTCACTCGGCTCGG----- mirR 18 2
-----TCACTCGGCTCGGCCAC----- mirR 18 2
-----ACCCAATGCTGTCCCACC----- morR 18 19
-----CCCAATGCTGTCCCACC----- morR 18 4
-----ACCCAATGCTGTCCCACC----- morR 19 3
-----TGCTGTCCCACCCTTCTT----- morR 19 1
-----TGCTGTCCCACCCTTCTT----- morR 22 1
-----ATGCTGTCCCACCCTTCTT----- morR 20 1
-----ATGCTGTCCCACCCTTCTT----- morR 18 1

```

>mmu-mir-18b

```

GAGCTGCTCCTTGTAAATGTGTCTCTTGTGTTAAGGTGCATCTAGTGTGTTAGTGAAGCAGCTTACAATCTACTGCCCTAAATGCCCTTCTCGCACAGGCTACTTCTTACCTTGCATTTGAAAAG species len
-----GTAATGTGTCTCTTGTGT----- morL 18 84
-----CTTGTAAATGTGTCTCTTG----- morL 18 15
GAGCTGCTCCTTGTAAATGTGTCTCTTGTGT----- morL 30 11
-----CTCCTTGTAAATGTGTCTCTTGT----- morL 24 6
-----TTGTAATGTGTCTCTTGT----- morL 18 2

```

```

-----TGTAATGTGTCTCTTGTGT----- morL 19 2
-----AATGTGTCTCTTGTGTTA----- morL 18 2
-----CCTTGTAAATGTGTCTCTTGTGT----- morL 22 2
-----CTCCTTGTAAATGTGTCTCTTG----- morL 21 1
-----TAATGTGTCTCTTGTGTTA----- morL 19 1
-----CTTGTAAATGTGTCTCTTGT----- morL 19 1
-----CTTGTAAATGTGTCTCTTGTG----- morL 20 1
-----TCCTTGTAAATGTGTCTCTTGTGT----- morL 23 1
-----CTCCTTGTAAATGTGTCTCTTGT----- morL 22 1
-----TTGTAAATGTGTCTCTTGTGT----- morL 20 1
-----TAAGGTGCATCTAGTGCTGTT----- mirL 21 3432
-----TAAGGTGCATCTAGTGCTGTTAG----- mirL 23 2707
-----TAAGGTGCATCTAGTGCTGT----- mirL 20 2655
-----TAAGGTGCATCTAGTGCTGTTA----- mirL 22 2526
-----TAAGGTGCATCTAGTGCTG----- mirL 19 751
-----AAGGTGCATCTAGTGCTGTT----- mirL 20 450
-----AAGGTGCATCTAGTGCTGT----- mirL 19 362
-----AAGGTGCATCTAGTGCTGTTA----- mirL 21 347
-----AAGGTGCATCTAGTGCTGTTAG----- mirL 22 300
-----TAAGGTGCATCTAGTGCTGTTAGT----- mirL 24 279
-----TAAGGTGCATCTAGTGCT----- mirL 18 277
-----AAGGTGCATCTAGTGCTG----- mirL 18 120
-----AAGGTGCATCTAGTGCTGTTAGT----- mirL 23 59
-----AGGTGCATCTAGTGCTGTTAGT----- mirL 22 15
-----AGGTGCATCTAGTGCTGTTA----- mirL 20 9
-----GGTGCATCTAGTGCTGTTA----- mirL 19 8
-----AGGTGCATCTAGTGCTGTT----- mirL 19 3
-----AGGTGCATCTAGTGCTGT----- mirL 18 3
-----AAGGTGCATCTAGTGCTGTTAGTGAAGC----- mirL 28 3
-----AGGTGCATCTAGTGCTGTTAG----- mirL 21 2
-----AGGTGCATCTAGTGCTGTTAGT----- mirL 23 1
-----TTAAGGTGCATCTAGTGCTGTTAG----- mirL 24 1
-----TTAAGGTGCATCTAGTGCTGTTA----- mirL 23 1
-----TGTTAAGGTGCATCTAGTGCTGT----- mirL 23 1
-----TTAAGGTGCATCTAGTGCTGT----- mirL 21 1
-----TTAAGGTGCATCTAGTGCTG----- mirL 20 1
-----AGTGAAGCAGCTTACAATC----- loop 19 7
-----GTGAAGCAGCTTACAATC----- loop 18 6
-----TGAAGCAGCTTACAATCT----- loop 18 2
-----GTGAAGCAGCTTACAATCT----- loop 19 1
-----TAGTGAAGCAGCTTACAA----- loop 18 1
-----TACTGCCCTAAATGCCCTTCT----- mirR 22 3372
-----ACTGCCCTAAATGCCCTTCTCG----- mirR 23 2099
-----ACTGCCCTAAATGCCCTTCTC----- mirR 22 1981
-----ACTGCCCTAAATGCCCTTCT----- mirR 21 1287
-----TGCCCTAAATGCCCTTCTCG----- mirR 22 1273

```

```

-----ACTGCCCTAAATGCCCTTCTCGC-----mirR 24 797
-----TACTGCCCTAAATGCCCTTCTC-----mirR 23 474
-----TACTGCCCTAAATGCCCTTCTC-----mirR 21 395
-----TACTGCCCTAAATGCCCTTCTCG-----mirR 24 337
-----TGCCCTAAATGCCCTTCTCG-----mirR 21 233
-----TGCCCTAAATGCCCTTCTC-----mirR 20 188
-----TACTGCCCTAAATGCCCTT-----mirR 20 162
-----CTACTGCCCTAAATGCCCTTCTC-----mirR 22 142
-----ACTGCCCTAAATGCCCTTCTC-----mirR 20 138
-----ACTGCCCTAAATGCCCTTCTCGCA-----mirR 25 134
-----TGCCCTAAATGCCCTTCTCGCA-----mirR 23 98
-----TGCCCTAAATGCCCTTCTC-----mirR 19 91
-----TACTGCCCTAAATGCCCT-----mirR 19 79
-----CTACTGCCCTAAATGCCCTTCTC-----mirR 23 61
-----ACTGCCCTAAATGCCCTT-----mirR 19 58
-----TACTGCCCTAAATGCCCTTCTCGC-----mirR 25 51
-----TGCCCTAAATGCCCTTCTCGCAC-----mirR 24 36
-----CTACTGCCCTAAATGCCCTT-----mirR 21 27
-----CTACTGCCCTAAATGCCCT-----mirR 20 12
-----CTACTGCCCTAAATGCCCTTCTC-----mirR 24 8
-----TGCCCTAAATGCCCTTCTC-----mirR 18 7
-----CTGCCCTAAATGCCCTTCTCGC-----mirR 23 5
-----CTGCCCTAAATGCCCTTCTCG-----mirR 22 5
-----CTGCCCTAAATGCCCTTCTC-----mirR 21 2
-----TCTACTGCCCTAAATGCCCTTCTC-----mirR 23 1
-----CTACTGCCCTAAATGCCCT-----mirR 18 1
-----CTGCCCTAAATGCCCTT-----mirR 18 1
-----ACAGGCTACTTCTTACCT-----morR 18 11
-----GCACAGGCTACTTCTTACCTTGCATTTGAAAAG-----morR 33 5
-----GCACAGGCTACTTCTTACCTTGCATTTGA-----morR 29 1

```

>mmu-mir-676

```

CATCACTACTTTGCCTGAATGCATGACTCTACAACCTTAGGACTTGCAGAATTAAGGAATGCCGTCTGAGGTTGTTGAGCTGTGCGTTTCTGGGCCTTT species len reads
-----ACTTTGCCTGAATGCATG-----morL 18 16
CATCACTACTTTGCCTGAATGCATGA-----morL 26 3
-----TTTGCCTGAATGCATGAC-----morL 18 1
-----CTACTTTGCCTGAATGCATG-----morL 20 1
-----ACTCTACAACCTTAGGACTTGC-----mirL 22 8121
-----ACTCTACAACCTTAGGACTTGC-----mirL 21 2136
-----ACTCTACAACCTTAGGACTTGC-----mirL 23 1453
-----ACTCTACAACCTTAGGACT-----mirL 19 238
-----ACTCTACAACCTTAGGACTT-----mirL 20 200
-----CTCTACAACCTTAGGACTTGC-----mirL 22 151
-----CTCTACAACCTTAGGACTTGC-----mirL 21 138
-----CTCTACAACCTTAGGACTTGC-----mirL 20 71
-----ACTCTACAACCTTAGGACTTGCAG-----mirL 24 61

```

```

-----ACTCTACAACCTTAGGAC----- mirL 18 44
-----CTACAACCTTAGGACTTGC----- mirL 19 32
-----CTACAACCTTAGGACTTG----- mirL 18 26
-----TCTACAACCTTAGGACTTGC----- mirL 20 12
-----TCTACAACCTTAGGACTTG----- mirL 19 9
-----CTCTACAACCTTAGGACT----- mirL 18 4
-----CTCTACAACCTTAGGACTTGCA----- mirL 23 3
-----TGACTCTACAACCTTAGGACTTGC----- mirL 24 2
-----GACTCTACAACCTTAGGACTTG----- mirL 22 1
-----CTCTACAACCTTAGGACTT----- mirL 19 1
-----TCTACAACCTTAGGACTT----- mirL 18 1
-----GACTCTACAACCTTAGGACTTGC----- mirL 23 1
-----GACTCTACAACCTTAGGACTTGCA----- mirL 24 1
-----CTACAACCTTAGGACTTGCA----- mirL 20 1
-----CAGAATTAAGGAATGCC----- loop 18 1
-----AGAATTAAGGAATGCC----- loop 18 1
-----GCAGAATTAAGGAATGCC----- loop 19 1
-----CCGTCCTGAGGTTGTTGAGCTG----- mirR 22 5874
-----CCGTCCTGAGGTTGTTGAGCT----- mirR 21 5368
-----CCGTCCTGAGGTTGTTGAGCTGT----- mirR 23 2811
-----CCGTCCTGAGGTTGTTGAGC----- mirR 20 323
-----CCGTCCTGAGGTTGTTGAGCTGTG----- mirR 24 267
-----CCGTCCTGAGGTTGTTGAG----- mirR 19 185
-----CCGTCCTGAGGTTGTTGAGCTGTGC----- mirR 25 125
-----CGTCCTGAGGTTGTTGAGCT----- mirR 20 34
-----CGTCCTGAGGTTGTTGAGCTGT----- mirR 22 30
-----GTCCTGAGGTTGTTGAGCT----- mirR 19 27
-----CGTCCTGAGGTTGTTGAGCTG----- mirR 21 25
-----GCCGTCCTGAGGTTGTTG----- mirR 18 23
-----GTCCTGAGGTTGTTGAGC----- mirR 18 3
-----TCCTGAGGTTGTTGAGCT----- mirR 18 2
-----TGCCGTCCTGAGGTTGTTGAGCT----- mirR 23 1
-----GTCCTGAGGTTGTTGAGCTG----- mirR 20 1
-----CGTCCTGAGGTTGTTGAGC----- mirR 19 1
-----CGTCCTGAGGTTGTTGAG----- mirR 18 1
-----GTGCGTTTCTGGCCTTT morR 18 1

```

>mmu-mir-132

```

CCCCCCCCCGCTCTCCAGGGCAACCGTGGCTTTCGATTGTTACTGTGGGAACCGGAGGTAACAGTCTACAGCCATGGTCGCCCCGAGCACGCCACGCTCCCCACCAC species len reads
----CCCCCGCTCTCCAGGGCA----- morL 19 26
-CCGCCCCCGCTCTCCAGGGCA----- morL 22 9
----CGCGTCTCCAGGGCAACC----- morL 18 7
----CCCCCGCTCTCCAGGGC----- morL 18 3
--GCCCCCGCTCTCCAGGGCA----- morL 20 3
--GCCCCCGCTCTCCAGGG----- morL 18 2
CCCCCCCCCGCTCTCCAGGGCAA----- morL 24 2

```

```

CCCCCCCCCGCTCTCCAGGGCA----- morL 23 2
----CCCCCGCTCTCCAGGGCAAC----- morL 21 1
--CGCCCCCGCTCTCCAGGGCAA----- morL 22 1
----CCCCCGCTCTCCAGGGCAAC----- morL 20 1
-CCGCCCCCGCTCTCCAGGGCAA----- morL 23 1
----CCGCGTCTCCAGGGCAAC----- morL 18 1
----CCCCCGCTCTCCAGGGCA----- morL 18 1
----CCCCCGCTCTCCAGGGCAA----- morL 19 1
--GCCCCCGCTCTCCAGGGC----- morL 19 1
-----ACCGTGGCTTTCGATTGTTACT----- mirL 22 7284
-----AACCGTGGCTTTCGATTGTTA----- mirL 21 498
-----ACCGTGGCTTTCGATTGTTAC----- mirL 21 478
-----ACCGTGGCTTTCGATTGTTA----- mirL 20 211
-----AACCGTGGCTTTCGATTGTTAC----- mirL 22 142
-----AACCGTGGCTTTCGATTGTT----- mirL 20 89
-----ACCGTGGCTTTCGATTGTTACTG----- mirL 23 71
-----ACCGTGGCTTTCGATTGTTACTGT----- mirL 24 21
-----AACCGTGGCTTTCGATTG----- mirL 18 20
-----ACCGTGGCTTTCGATTGTT----- mirL 19 18
-----ACCGTGGCTTTCGATTGT----- mirL 18 16
-----CCGTGGCTTTCGATTGTTACT----- mirL 21 15
-----AACCGTGGCTTTCGATTGTTACT----- mirL 23 14
-----AACCGTGGCTTTCGATTGT----- mirL 19 12
-----GTGGCTTTCGATTGTTACT----- mirL 19 11
-----CGTGGCTTTCGATTGTTACT----- mirL 20 3
-----CAACCGTGGCTTTCGATTGTTACT----- mirL 24 3
-----CCGTGGCTTTCGATTGTTAC----- mirL 20 1
-----AACCGTGGCTTTCGATTGTTACTGTGG----- mirL 27 1
-----CAACCGTGGCTTTCGATTGTTA----- mirL 22 1
-----GTGGCTTTCGATTGTTAC----- mirL 18 1
-----CCGTGGCTTTCGATTGTTA----- mirL 19 1
-----CTGTGGGAACCGGAGGTA----- loop 18 5
-----TGTGGGAACCGGAGGTAA----- loop 18 1
-----ACTGTGGGAACCGGAGGT----- loop 18 1
-----TAACAGTCTACAGCCATGGTCG----- mirR 22 7812
-----TAACAGTCTACAGCCATGGTCGC----- mirR 23 3888
-----TAACAGTCTACAGCCATGGT----- mirR 20 2196
-----TAACAGTCTACAGCCATGGTC----- mirR 21 1769
-----AACAGTCTACAGCCATGGTCG----- mirR 21 983
-----AACAGTCTACAGCCATGGTCGC----- mirR 22 487
-----TAACAGTCTACAGCCATGGTCGCC----- mirR 24 337
-----ACAGTCTACAGCCATGGTCGC----- mirR 21 236
-----TAACAGTCTACAGCCATG----- mirR 18 235
-----AACAGTCTACAGCCATGGT----- mirR 19 221
-----TAACAGTCTACAGCCATGG----- mirR 19 194
-----AACAGTCTACAGCCATGGTC----- mirR 20 117

```

|                                                                                                             |         |     |       |
|-------------------------------------------------------------------------------------------------------------|---------|-----|-------|
| -----AACAGTCTACAGCCATGGTCGCC-----                                                                           | mirR    | 23  | 60    |
| -----ACAGTCTACAGCCATGGTCGCC-----                                                                            | mirR    | 22  | 45    |
| -----AACAGTCTACAGCCATGG-----                                                                                | mirR    | 18  | 39    |
| -----ACAGTCTACAGCCATGGTCG-----                                                                              | mirR    | 20  | 35    |
| -----ACAGTCTACAGCCATGGT-----                                                                                | mirR    | 18  | 26    |
| -----CAGTCTACAGCCATGGTC-----                                                                                | mirR    | 18  | 24    |
| -----ACAGTCTACAGCCATGGTC-----                                                                               | mirR    | 19  | 18    |
| -----AACAGTCTACAGCCATGGTCGCCCC-----                                                                         | mirR    | 25  | 16    |
| -----CAGTCTACAGCCATGGTCG-----                                                                               | mirR    | 19  | 8     |
| -----ACAGTCTACAGCCATGGTCGCC-----                                                                            | mirR    | 23  | 7     |
| -----GTAACAGTCTACAGCCATGGTCG-----                                                                           | mirR    | 23  | 3     |
| -----CAGTCTACAGCCATGGTCGC-----                                                                              | mirR    | 20  | 2     |
| -----GTAACAGTCTACAGCCATGGT-----                                                                             | mirR    | 21  | 2     |
| -----AGGTAACAGTCTACAGCCA-----                                                                               | mirR    | 19  | 2     |
| -----ACAGTCTACAGCCATGGTCGCCCC-----                                                                          | mirR    | 24  | 1     |
| -----GGTAACAGTCTACAGCCATG-----                                                                              | mirR    | 20  | 1     |
| -----GTAACAGTCTACAGCCATG-----                                                                               | mirR    | 19  | 1     |
| -----CCCCGCAGCAGCCACGCTCCCCACC--                                                                            | morR    | 27  | 19    |
| -----CCCCGCAGCAGCCACGCTCCCC-----                                                                            | morR    | 24  | 5     |
| -----CCCCGCAGCAGCCACGCTCCCCACCAC                                                                            | morR    | 29  | 4     |
| -----CCCCGCAGCAGCCACGC-----                                                                                 | morR    | 19  | 3     |
| -----CCCCGCAGCAGCCACGCTCCC-----                                                                             | morR    | 23  | 2     |
| -----CCGCAGCAGCCACGCTC-----                                                                                 | morR    | 19  | 1     |
| -----TCGCCCGCAGCAGCCCA-----                                                                                 | morR    | 19  | 1     |
| -----CCCCGCAGCAGCCACG-----                                                                                  | morR    | 18  | 1     |
| -----CCCGCAGCAGCCACGCTCCC-----                                                                              | morR    | 22  | 1     |
| -----CCCCGCAGCAGCCACGCTCCCCAC--                                                                             | morR    | 26  | 1     |
| <br>                                                                                                        |         |     |       |
| >mmu-mir-431                                                                                                |         |     |       |
| TGTCCTGCGCGTCCTGCGAGGTGCTTGCAGGCCGTCATGCAGGCCACACTGACGGTAACGTTGCAGGTCGCTTTCGCAAGACGACATCTTCATCCCCAACGACGTGC | species | len | reads |
| TGTCCTGCGCGTCCTGCGAGG-----                                                                                  | morL    | 21  | 10    |
| -GTCCTGCGCGTCCTGCGAGG-----                                                                                  | morL    | 20  | 2     |
| ---CCTGCGCGTCCTGCGAGGT-----                                                                                 | morL    | 19  | 1     |
| TGTCCTGCGCGTCCTGCGAGGT-----                                                                                 | morL    | 22  | 1     |
| ---CCTGCGCGTCCTGCGAGG-----                                                                                  | morL    | 18  | 1     |
| -----TGTCTTGCAGGCCGTCATGCA-----                                                                             | mirL    | 21  | 13485 |
| -----TGTCTTGCAGGCCGTCATGC-----                                                                              | mirL    | 20  | 3378  |
| -----TGTCTTGCAGGCCGTCATGCAG-----                                                                            | mirL    | 22  | 2316  |
| -----TGTCTTGCAGGCCGTCATG-----                                                                               | mirL    | 19  | 1536  |
| -----TGTCTTGCAGGCCGTCATGCAGG-----                                                                           | mirL    | 23  | 1060  |
| -----GTCTTGCAGGCCGTCATGCA-----                                                                              | mirL    | 20  | 490   |
| -----TGTCTTGCAGGCCGTCATGCAGGC-----                                                                          | mirL    | 24  | 358   |
| -----GTCTTGCAGGCCGTCATGCAG-----                                                                             | mirL    | 21  | 266   |
| -----GTCTTGCAGGCCGTCATGC-----                                                                               | mirL    | 19  | 222   |
| -----TGTCTTGCAGGCCGTCAT-----                                                                                | mirL    | 18  | 213   |
| -----GTCTTGCAGGCCGTCATG-----                                                                                | mirL    | 18  | 95    |

```

-----GTCTTGCAGGCCGTCATGCAGG----- mirL 22 94
-----GTCTTGCAGGCCGTCATGCAGGC----- mirL 23 46
-----CTTGCAGGCCGTCATGCA----- mirL 18 17
-----TCTTGCAGGCCGTCATGCA----- mirL 19 15
-----TCTTGCAGGCCGTCATGC----- mirL 18 8
-----GTGTCTTGCAGGCCGTCATGCA----- mirL 22 5
-----GTGTCTTGCAGGCCGTCATGC----- mirL 21 3
-----GGTGTCTTGCAGGCCGTCATGCAGG----- mirL 25 2
-----GGTGTCTTGCAGGCCGTC----- mirL 18 2
-----GTCTTGCAGGCCGTCATGCAGGCCACAC----- mirL 28 1
-----CTTGCAGGCCGTCATGCAGG----- mirL 20 1
-----AGGTGTCTTGCAGGCCGTC----- mirL 20 1
-----GGCCACACTGACGGTAACGTTG----- loop 22 98
-----GGCCACACTGACGGTAACGTTGC----- loop 23 11
-----GGCCACACTGACGGTAACGT----- loop 20 2
-----CCACACTGACGGTAACGTT----- loop 19 1
-----CCACACTGACGGTAACGTTGCA----- loop 22 1
-----CAGGTCGTCTTGCAGGGCTTCT----- mirR 22 1738
-----CAGGTCGTCTTGCAGGGCTTC----- mirR 21 748
-----CAGGTCGTCTTGCAGGGCTTCTC----- mirR 23 373
-----TGCAGGTCGTCTTGCAGGGCTTC----- mirR 23 159
-----TGCAGGTCGTCTTGCAGGGCTTCT----- mirR 24 129
-----CAGGTCGTCTTGCAGGGCTT----- mirR 20 94
-----CAGGTCGTCTTGCAGGGCTTCTCG----- mirR 24 80
-----TTGCAGGTCGTCTTGCAGGGCTTC----- mirR 24 64
-----TTGCAGGTCGTCTTGCAGGGCTTCTC----- mirR 26 60
-----TTGCAGGTCGTCTTGCAGGGCTTCT----- mirR 25 58
-----GTCGTCTTGCAGGGCTTCT----- mirR 19 55
-----TGCAGGTCGTCTTGCAGGGCTTCTC----- mirR 25 51
-----TGCAGGTCGTCTTGCAGGGCTTCTCG----- mirR 26 44
-----GCAGGTCGTCTTGCAGGGCTTC----- mirR 22 31
-----GGTCGTCTTGCAGGGCTTCT----- mirR 20 29
-----CAGGTCGTCTTGCAGGGCT----- mirR 19 26
-----TTGCAGGTCGTCTTGCAGGGCTT----- mirR 23 22
-----CAGGTCGTCTTGCAGGGCTTCTCGC----- mirR 25 22
-----TGCAGGTCGTCTTGCAGGGCTTCTCGC----- mirR 27 14
-----GCAGGTCGTCTTGCAGGGCTTCT----- mirR 23 11
-----TTGCAGGTCGTCTTGCAGGGCT----- mirR 22 8
-----TGCAGGTCGTCTTGCAGGGCTT----- mirR 22 7
-----TTGCAGGTCGTCTTGCAGGGCTTCTCGC----- mirR 28 6
-----TTGCAGGTCGTCTTGCAGGG----- mirR 20 4
-----AGGTCGTCTTGCAGGGCTTCT----- mirR 21 4
-----TGCAGGTCGTCTTGCAGGGC----- mirR 20 4
-----AGGTCGTCTTGCAGGGCT----- mirR 18 2
-----GGTCGTCTTGCAGGGCTTC----- mirR 19 2
-----GCAGGTCGTCTTGCAGGGCTTCTC----- mirR 24 2

```





```

-----TTTGGTTATCTAGCTGTATGAGT----- mirL 23 8
-----TTGGTTATCTAGCTGTATGA----- mirL 20 6
-----CTTTGGTTATCTAGCTGTATGAGT----- mirL 24 4
-----CTCTTTGGTTATCTAGCTGTATGAG----- mirL 25 4
-----TTGGTTATCTAGCTGTATG----- mirL 19 3
-----TTGGTTATCTAGCTGTATGAG----- mirL 21 3
-----TTTGGTTATCTAGCTGTATG----- mirL 20 2
-----CTCTTTGGTTATCTAGCTGTATGA----- mirL 24 1
-----TTTGGTTATCTAGCTGTAT----- mirL 19 1
-----TTTGGTTATCTAGCTGTA----- mirL 18 1
-----CTCTTTGGTTATCTAGCTGTA----- mirL 21 1
-----TCTCTTTGGTTATCTAGCTGTATGA----- mirL 25 1
-----AGAAATGACTCTCACAAC----- mirR 18 6973
-----TAGAAATGACTCTCACAAC----- mirR 19 3
-----AGTAGAAATGACTCTCAC----- mirR 18 2
-----AGAAATGACTCTCACAAC----- mirR 19 1
-----ACTTCTGCGTGCGATGGC morR 18 1

```

>mmu-mir-326

```

GCCTCATCTGTCTGTTGGGCTGGGGCAGGGCCTTTGTGAAGCGGGTTATGCTCAGATCGCCTCTGGGCCCTTCCTCCAGTCCCAGGCAGATTTACTT species len reads
-CCTCATCTGTCTGTTGGGCT----- morL 20 39
--CTCATCTGTCTGTTGGGCT----- morL 19 4
-CCTCATCTGTCTGTTGGGCTG----- morL 21 4
GCCTCATCTGTCTGTTGGGCT----- morL 21 4
---CATCTGTCTGTTGGGCTG----- morL 18 2
-CCTCATCTGTCTGTTGGGCTGGG----- morL 23 2
-CCTCATCTGTCTGTTGGG----- morL 18 2
---ATCTGTCTGTTGGGCTGG----- morL 18 2
GCCTCATCTGTCTGTTGGGCTG----- morL 22 1
--CTCATCTGTCTGTTGGGCTG----- morL 20 1
---TCATCTGTCTGTTGGGCT----- morL 18 1
GCCTCATCTGTCTGTTGGG----- morL 19 1
--CTCATCTGTCTGTTGGG----- morL 18 1
-----GGGGCAGGGCCTTTGTGAAGGC----- mirL 23 13
-----GGGCAGGGCCTTTGTGAA----- mirL 18 5
-----GGGGCAGGGCCTTTGTGA----- mirL 19 2
-----GGGGCAGGGCCTTTGTGAAGCGG----- mirL 25 2
-----GGGGCAGGGCCTTTGTGAAGCGGGT----- mirL 27 1
-----GGGGCAGGGCCTTTGTG----- mirL 18 1
-----GGGGCAGGGCCTTTGTGAA----- mirL 20 1
-----GCTGGGGCAGGGCCTTT----- mirL 18 1
-----GGTTATGCTCAGATCGCC----- loop 18 1
-----CCTCTGGGCCCTTCCTCCAGT----- mirR 21 18455
-----CCTCTGGGCCCTTCCTCCAGTC----- mirR 22 3894
-----CCTCTGGGCCCTTCCTCCAGTCC----- mirR 23 1851
-----CCTCTGGGCCCTTCCTCCAG----- mirR 20 1555

```

```
-----CCTCTGGGCCCTTCCTCCA----- mirR 19 404
-----CCTCTGGGCCCTTCCTCCAGTCCC----- mirR 24 261
-----CTCTGGGCCCTTCCTCCAGT----- mirR 20 35
-----CCTCTGGGCCCTTCCTCCAGTCCCG----- mirR 25 22
-----CTCTGGGCCCTTCCTCCAGTC----- mirR 21 12
-----TCTGGGCCCTTCCTCCAGTC----- mirR 20 11
-----CTCTGGGCCCTTCCTCCAG----- mirR 19 9
-----CTCTGGGCCCTTCCTCCAGTCCC----- mirR 23 8
-----CTCTGGGCCCTTCCTCCAGTCC----- mirR 22 8
-----CTGGGCCCTTCCTCCAGT----- mirR 18 6
-----TCTGGGCCCTTCCTCCAGT----- mirR 19 4
-----CTCTGGGCCCTTCCTCCA----- mirR 18 2
-----TCTGGGCCCTTCCTCCAGTCC----- mirR 21 2
-----TCTGGGCCCTTCCTCCAG----- mirR 18 2
-----TCTGGGCCCTTCCTCCAGTCCC----- mirR 22 2
-----TCGCCTCTGGGCCCTTCCTCCAGTCC----- mirR 26 1
-----CTGGGCCCTTCCTCCAGTC----- mirR 19 1
-----CGCCTCTGGGCCCTTCCTCCAGT----- mirR 23 1
-----GCCTCTGGGCCCTTCCTCCAG----- mirR 21 1
-----TCCCGAGGCAGATTACTT morR 19 2
```

>mmu-mir-1196

```
ATGCTGGTCTTGAAGTACACAGAAATCTACCTGCCTCTGCCTTCCAAGTACTGGGCAGTGTGCCACCAAAACCCTACATTTTTGTGGGCTGGGGGTGAGGGTGGTTTTTTTTTTTTTAAATACCAAAATGCAATC speci
--GCTGGTCTTGAAGTACACA----- morL
ATGCTGGTCTTGAAGTACACAGA----- morL
--CTGGTCTTGAAGTACACAG----- morL
-----GTCTTGAAGTACACAGAAA----- morL
-----AAATCTACCTGCCTCTGCCTTC----- mirL
-----AAATCTACCTGCCTCTGCCT----- mirL
-----AAATCTACCTGCCTCTGCCTT----- mirL
-----AAATCTACCTGCCTCTGCCTTCC----- mirL
-----AATCTACCTGCCTCTGCCTTC----- mirL
-----AATCTACCTGCCTCTGCCT----- mirL
-----AATCTACCTGCCTCTGCCTTCC----- mirL
-----AATCTACCTGCCTCTGCCTTCCA----- mirL
-----AAATCTACCTGCCTCTGCCTTCCA----- mirL
-----AAATCTACCTGCCTCTGCC----- mirL
-----AAATCTACCTGCCTCTGC----- mirL
-----AATCTACCTGCCTCTGCCTTCCAA----- mirL
-----AATCTACCTGCCTCTGCC----- mirL
-----GAAATCTACCTGCCTCTGCCTTC----- mirL
-----GAAATCTACCTGCCTCTGCCT----- mirL
-----GAAATCTACCTGCCTCTGCCTTCC----- mirL
-----GAAATCTACCTGCCTCTGCCTT----- mirL
-----AGAAATCTACCTGCCTCTGCCT----- mirL
```

```
-----AGAAATCTACCTGCCTCTGCC----- mirL
-----GAAATCTACCTGCCTCTGC----- mirL
-----GAAATCTACCTGCCTCTGCC----- mirL
-----ATCTACCTGCCTCTGCCT----- mirL
-----AGAAATCTACCTGCCTCTGCCTTC----- mirL
-----ATCTACCTGCCTCTGCCTTC----- mirL
-----AGAAATCTACCTGCCTCTG----- mirL
-----AGAAATCTACCTGCCTCTGCCTTCC----- mirL
-----GAAATCTACCTGCCTCTGCCTTCCA----- mirL
-----AGAAATCTACCTGCCTCTGCCTT----- mirL
-----TCTACCTGCCTCTGCCTTCC----- mirL
-----AGAAATCTACCTGCCTCTGC----- mirL
-----TCTACCTGCCTCTGCCTTC----- mirL
-----CAGAAATCTACCTGCCTCTGCC----- mirL
-----CAGAAATCTACCTGCCTCT----- mirL
-----CAGAAATCTACCTGCCTCTGCCTT----- mirL
-----CAGAAATCTACCTGCCTCTGC----- mirL
-----TCTACCTGCCTCTGCCTT----- mirL
-----ATCTACCTGCCTCTGCCTTCCAA----- mirL
-----CAGAAATCTACCTGCCTC----- mirL
-----ATCTACCTGCCTCTGCCTTCCA----- mirL
-----TCTACCTGCCTCTGCCTTCCAA----- mirL
-----ATCTACCTGCCTCTGCCTT----- mirL
-----ATCTACCTGCCTCTGCCTTCC----- mirL
-----CAGAAATCTACCTGCCTCTGCCTTCCA----- mirL
-----CAGAAATCTACCTGCCTCTGCCT----- mirL
-----TCTACCTGCCTCTGCCTTCCAAG----- mirL
-----GGTGGTTTTTTTTTTTT----- mirR
-----GGGTGGTTTTTTTTTTTT----- mirR
-----GGGTGGTTTTTTTTTTTT----- mirR
-----GTGGTTTTTTTTTTTTTA----- mirR
-----GGGTGGTTTTTTTTTTTTTA----- mirR
-----GGGTGGTTTTTTTTTTTTTAA----- mirR
-----GAGGGTGGTTTTTTTTTT----- mirR
-----GGTTTTTTTTTTTTTAAA----- mirR
-----GGTGGTTTTTTTTTTTTTA----- mirR
-----AGGTGGTTTTTTTTTTTT----- mirR
-----GGTTTTTTTTTTTTTAAATAC----- mirR
-----GGTGGTTTTTTTTTTTTTAAA----- mirR
-----GGTTTTTTTTTTTTTAAATA----- mirR
-----GAGGTGGTTTTTTTTTTTT----- mirR
-----GGTGGTTTTTTTTTTTTTAAATAC----- mirR
-----TGGTTTTTTTTTTTTTAA----- mirR
-----AAATACCAAAATGCAATC morR
```

>mmu-mir-148b

|                                                                                                            | species | len | reads |
|------------------------------------------------------------------------------------------------------------|---------|-----|-------|
| GGCACCCCTTAGCATTTGAGGTGAAGTTCTGTTATACACTCAGGCTGTGGCTCTGAAAGTCAGTGCATCACAGAACCTTTGTCTCGAAAGCTTTCTAGCAGCTGCC | morL    | 20  | 8     |
| -GCACCCCTTAGCATTTGAGGT-----                                                                                | morL    | 18  | 1     |
| GGCACCCCTTAGCATTTGA-----                                                                                   | morL    | 20  | 1     |
| --CACCCCTTAGCATTTGAGGTG-----                                                                               | mirL    | 24  | 824   |
| -----GAAGTTCTGTTATACACTCAGGCT-----                                                                         | mirL    | 23  | 592   |
| -----GAAGTTCTGTTATACACTCAGGC-----                                                                          | mirL    | 22  | 314   |
| -----AAGTTCTGTTATACACTCAGGC-----                                                                           | mirL    | 22  | 221   |
| -----GAAGTTCTGTTATACACTCAGG-----                                                                           | mirL    | 21  | 136   |
| -----GAAGTTCTGTTATACACTCAG-----                                                                            | mirL    | 25  | 113   |
| -----GAAGTTCTGTTATACACTCAGGCTG-----                                                                        | mirL    | 23  | 63    |
| -----AAGTTCTGTTATACACTCAGGCT-----                                                                          | mirL    | 20  | 42    |
| -----GAAGTTCTGTTATACACTCA-----                                                                             | mirL    | 21  | 38    |
| -----AAGTTCTGTTATACACTCAGG-----                                                                            | mirL    | 26  | 36    |
| -----GAAGTTCTGTTATACACTCAGGCTGT-----                                                                       | mirL    | 23  | 29    |
| -----TGAAGTTCTGTTATACACTCAGG-----                                                                          | mirL    | 20  | 16    |
| -----GTTCTGTTATACACTCAGGC-----                                                                             | mirL    | 21  | 13    |
| -----AGTTCTGTTATACACTCAGGC-----                                                                            | mirL    | 19  | 13    |
| -----AAGTTCTGTTATACACTCA-----                                                                              | mirL    | 20  | 11    |
| -----AGTTCTGTTATACACTCAGG-----                                                                             | mirL    | 18  | 9     |
| -----GTTCTGTTATACACTCAG-----                                                                               | mirL    | 20  | 7     |
| -----AAGTTCTGTTATACACTCAG-----                                                                             | mirL    | 24  | 6     |
| -----AAGTTCTGTTATACACTCAGGCTG-----                                                                         | mirL    | 22  | 5     |
| -----TGAAGTTCTGTTATACACTCAG-----                                                                           | mirL    | 18  | 4     |
| -----AAGTTCTGTTATACACTC-----                                                                               | mirL    | 18  | 4     |
| -----TGAAGTTCTGTTATACAC-----                                                                               | mirL    | 18  | 2     |
| -----GGTGAAGTTCTGTTATAC-----                                                                               | mirL    | 18  | 2     |
| -----AGTTCTGTTATACACTCA-----                                                                               | loop    | 18  | 1     |
| -----GCTGTGGCTCTGAAAGTC-----                                                                               | mirR    | 22  | 13030 |
| -----TCAGTGCATCACAGAACCTTTGT-----                                                                          | mirR    | 23  | 6219  |
| -----TCAGTGCATCACAGAACCTTTGTC-----                                                                         | mirR    | 24  | 1838  |
| -----TCAGTGCATCACAGAACCTTTGTCT-----                                                                        | mirR    | 21  | 1282  |
| -----TCAGTGCATCACAGAACCTTTG-----                                                                           | mirR    | 21  | 317   |
| -----CAGTGCATCACAGAACCTTTGT-----                                                                           | mirR    | 25  | 317   |
| -----TCAGTGCATCACAGAACCTTTGTCTC-----                                                                       | mirR    | 22  | 125   |
| -----CAGTGCATCACAGAACCTTTGTC-----                                                                          | mirR    | 20  | 109   |
| -----TCAGTGCATCACAGAACCTTT-----                                                                            | mirR    | 19  | 56    |
| -----TCAGTGCATCACAGAACTT-----                                                                              | mirR    | 23  | 42    |
| -----CAGTGCATCACAGAACCTTTGTCT-----                                                                         | mirR    | 20  | 38    |
| -----CAGTGCATCACAGAACCTTTG-----                                                                            | mirR    | 21  | 32    |
| -----AGTGCATCACAGAACCTTTGTC-----                                                                           | mirR    | 20  | 10    |
| -----AGTGCATCACAGAACCTTTGT-----                                                                            | mirR    | 24  | 7     |
| -----AGTGCATCACAGAACCTTTGTCTC-----                                                                         | mirR    | 19  | 6     |
| -----CAGTGCATCACAGAACCTTT-----                                                                             | mirR    | 19  | 5     |
| -----AGTGCATCACAGAACCTTTG-----                                                                             | mirR    | 18  | 3     |
| -----AGTGCATCACAGAACCTTT-----                                                                              | mirR    | 18  | 2     |
| -----CAGTGCATCACAGAACTT-----                                                                               |         |     |       |

```

-----AGTGCATCACAGAACTTTGTCTC----- mirR 23 1
-----GTCAGTGCATCACAGAACTTTGTC----- mirR 24 1
-----GTCAGTGCATCACAGAACTTTG----- mirR 22 1
-----AAGTCAGTGCATCACAGA----- mirR 18 1
-----CTCGAAAGCTTTCTAGCA----- morR 18 2
-----CTCGAAAGCTTTCTAGCAGTGCCC morR 25 1
-----GTCTCGAAAGCTTTCTAGCAG----- morR 21 1
-----GAAAGCTTTCTAGCAGTGCG----- morR 20 1

```

>mmu-mir-362

| Sequence                                                                                         | species | len | reads |
|--------------------------------------------------------------------------------------------------|---------|-----|-------|
| TCTTGCTTGCTCCCCCTCTCGAATCCTTGGAACTAGGTGTGAATGCTGCTTCAGTGCAACACACCTGTTCAAGGATTCAAAGAGGCTGAGCCTTGT | morL    | 19  | 10    |
| --TTGCTTGCTCCCCCTCTCG--                                                                          | morL    | 18  | 10    |
| -CTTGCTTGCTCCCCCTCT-                                                                             | morL    | 18  | 2     |
| -----TTGCTCCCCCTCTCGAAT-----                                                                     | morL    | 20  | 2     |
| -CTTGCTTGCTCCCCCTCTCG-                                                                           | morL    | 19  | 2     |
| -CTTGCTTGCTCCCCCTCTC-                                                                            | morL    | 18  | 1     |
| --TTGCTTGCTCCCCCTCTC--                                                                           | morL    | 18  | 1     |
| TCTTGCTTGCTCCCCCTC                                                                               | morL    | 18  | 1     |
| -----CTTGCTCCCCCTCTCGAA-----                                                                     | mirL    | 22  | 3918  |
| -----AATCCTTGGAACTAGGTGTGA-----                                                                  | mirL    | 24  | 3232  |
| -----AATCCTTGGAACTAGGTGTGAAT-----                                                                | mirL    | 26  | 2819  |
| -----AATCCTTGGAACTAGGTGTGAATGC-----                                                              | mirL    | 23  | 1967  |
| -----AATCCTTGGAACTAGGTGTGAA-----                                                                 | mirL    | 21  | 1101  |
| -----AATCCTTGGAACTAGGTGTG-----                                                                   | mirL    | 25  | 501   |
| -----AATCCTTGGAACTAGGTGTGAATG-----                                                               | mirL    | 27  | 366   |
| -----ATCCTTGGAACTAGGTGTGA-----                                                                   | mirL    | 21  | 95    |
| -----CCTTGGAACTAGGTGTGA-----                                                                     | mirL    | 19  | 76    |
| -----TCCTTGGAACTAGGTGTGA-----                                                                    | mirL    | 20  | 59    |
| -----TCCTTGGAACTAGGTGTGAA-----                                                                   | mirL    | 21  | 40    |
| -----ATCCTTGGAACTAGGTGTGAA-----                                                                  | mirL    | 22  | 37    |
| -----TCCTTGGAACTAGGTGTG-----                                                                     | mirL    | 19  | 25    |
| -----ATCCTTGGAACTAGGTGTGAAT-----                                                                 | mirL    | 23  | 19    |
| -----CCTTGGAACTAGGTGTGAAT-----                                                                   | mirL    | 21  | 19    |
| -----CCTTGGAACTAGGTGTGAA-----                                                                    | mirL    | 20  | 15    |
| -----ATCCTTGGAACTAGGTGTGAATGC-----                                                               | mirL    | 25  | 13    |
| -----CCTTGGAACTAGGTGTG-----                                                                      | mirL    | 18  | 9     |
| -----TCCTTGGAACTAGGTGTGAAT-----                                                                  | mirL    | 22  | 8     |
| -----GAATCCTTGGAACTAGGTGTGAA-----                                                                | mirL    | 24  | 4     |
| -----ATCCTTGGAACTAGGTGTG-----                                                                    | mirL    | 18  | 3     |
| -----ATCCTTGGAACTAGGTGTG-----                                                                    | mirL    | 20  | 2     |
| -----ATCCTTGGAACTAGGTGTGAATGC-----                                                               | mirL    | 26  | 2     |
| -----CGAATCCTTGGAACTAG-----                                                                      | mirL    | 18  | 1     |
| -----TCCTTGGAACTAGGTGTGAATGC-----                                                                | mirL    | 24  | 1     |
| -----TCGAATCCTTGGAACTAGGTGTG-----                                                                | mirL    | 24  | 1     |
| -----TCGAATCCTTGGAACTAGGTGTGAA-----                                                              | mirL    | 26  | 1     |

```

-----ATGCTGCTTCAGTGCAAC----- loop 18 5
-----GAATGCTGCTTCAGTGCA----- loop 18 2
-----GAATGCTGCTTCAGTGCAA----- loop 19 1
-----AACACACCTGTTCAAGGATTCA----- mirR 22 6135
-----AACACACCTGTTCAAGGATTCAA----- mirR 23 2882
-----AACACACCTGTTCAAGGATTC----- mirR 21 1555
-----AACACACCTGTTCAAGGATT----- mirR 20 421
-----AACACACCTGTTCAAGGATCAAAA----- mirR 24 120
-----CAACACACCTGTTCAAGGATTCA----- mirR 23 52
-----AACACACCTGTTCAAGGATCAAAAGA----- mirR 26 49
-----AACACACCTGTTCAAGGATTCAAAG----- mirR 25 40
-----CACACCTGTTCAAGGATTCA----- mirR 20 37
-----ACACACCTGTTCAAGGATTCA----- mirR 21 31
-----CAACACACCTGTTCAAGGATTC----- mirR 22 24
-----CAACACACCTGTTCAAGGATTCAA----- mirR 24 10
-----CAACACACCTGTTCAAGGATT----- mirR 21 9
-----ACACCTGTTCAAGGATTCA----- mirR 19 9
-----ACACCTGTTCAAGGATTC----- mirR 18 4
-----GCAACACACCTGTTCAAG----- mirR 18 3
-----ACACACCTGTTCAAGGATT----- mirR 19 2
-----ACACACCTGTTCAAGGAT----- mirR 18 1
-----ACACCTGTTCAAGGATTCAA----- mirR 20 1
-----ACACACCTGTTCAAGGATTCAA----- mirR 22 1
-----TGCAACACACCTGTTCAAGGATTCA----- mirR 25 1
-----CACACCTGTTCAAGGATT----- mirR 18 1
-----AAAGAGGCTGAGCCTTGT morR 18 1
-----TCAAAGAGGCTGAGCCTTGT morR 20 1

```

>mmu-mir-467e

```

GTC CCTATG TATGTG CCTGTG TG CATAAGTGTG AGCATGTATATGTGTATATTTTATG CATATA CATACACACCTATATACACATGCACACAGACATGCGGGA species len reads
-TCCCTATG TATGTG CCTGTG TG C----- morL 23 15
GTC CCTATG TATGTG CCTGTG TG C----- morL 24 7
GTC CCTATG TATGTG CCTGTG TG----- morL 23 1
-----ATAAGTGTG AGCATGTATATGT----- mirL 22 15625
-----TAAGTGTG AGCATGTATATGT----- mirL 22 1760
-----TAAGTGTG AGCATGTATATGT----- mirL 21 1595
-----ATAAGTGTG AGCATGTATATG----- mirL 21 1418
-----TAAGTGTG AGCATGTATATGT----- mirL 23 1400
-----ATAAGTGTG AGCATGTATATGT----- mirL 23 1202
-----ATAAGTGTG AGCATGTATAT----- mirL 20 722
-----AAGTGTG AGCATGTATATGT----- mirL 20 222
-----TAAGTGTG AGCATGTATATG----- mirL 20 189
-----ATAAGTGTG AGCATGTATATGT----- mirL 24 168
-----TAAGTGTG AGCATGTATATGT----- mirL 24 158
-----AAGTGTG AGCATGTATATGT----- mirL 22 141
-----AAGTGTG AGCATGTATATGT----- mirL 21 133

```

```

-----TAAGTGTGAGCATGTATATGTGTGT----- mirL 25 110
-----ATAAGTGTGAGCATGTATA----- mirL 19 102
-----TAAGTGTGAGCATGTATAT----- mirL 19 76
-----ATAAGTGTGAGCATGTATATGTGTG----- mirL 25 56
-----AGTGTGAGCATGTATATGT----- mirL 19 25
-----AAGTGTGAGCATGTATATG----- mirL 19 23
-----AAGTGTGAGCATGTATATGTGTG----- mirL 23 19
-----AAGTGTGAGCATGTATATGTGTGT----- mirL 24 19
-----AAGTGTGAGCATGTATAT----- mirL 18 12
-----AGTGTGAGCATGTATATG----- mirL 18 10
-----GCATAAGTGTGAGCATGTATATGT----- mirL 24 8
-----AGTGTGAGCATGTATATGTG----- mirL 20 5
-----CATAAGTGTGAGCATGTATATGT----- mirL 23 5
-----GCATAAGTGTGAGCATGTATAT----- mirL 22 4
-----TGCATAAGTGTGAGCATGTATA----- mirL 22 2
-----GCATAAGTGTGAGCATGTA----- mirL 19 1
-----AGTGTGAGCATGTATATGTGTGT----- mirL 23 1
-----GCATAAGTGTGAGCATGT----- mirL 18 1
-----GCATAAGTGTGAGCATGTATA----- mirL 21 1
-----CATAAGTGTGAGCATGTATAT----- mirL 21 1
-----GCATAAGTGTGAGCATGTAT----- mirL 20 1
-----GCATAAGTGTGAGCATGTATATG----- mirL 23 1
-----ATATACATACACACACCTATAT----- mirR 22 142
-----ATACATACACACACCTATATAC----- mirR 22 7
-----TATACATACACACACCTATAT----- mirR 21 7
-----ATACATACACACACCTATAT----- mirR 20 1
-----TATACACATGCACACAGAC----- morR 19 2
-----ATACACATGCACACAGACAT----- morR 20 2
-----ATACACATGCACACAGACATG----- morR 21 1
-----TACACATGCACACAGACATGCGGGA morR 25 1
-----TACACATGCACACAGACATG----- morR 20 1
-----TACACATGCACACAGACA----- morR 18 1
-----TATACACATGCACACAGACAT----- morR 21 1

```

>mmu-mir-9-2

```

GTGAGGGAAGCGAGTTGTTATCTTTGGTTATCTAGCTGTATGAGTGTATTGGTCTTCATAAAGCTAGATAACCGAAAGTAAAACTCCTTCAAGGTCACCG species len reads
--GAGGGAAGCGAGTTGTTA----- morL 18 110
GTGAGGGAAGCGAGTTGTTA----- morL 20 11
---GGGAAGCGAGTTGTTATC----- morL 18 2
--GAGGGAAGCGAGTTGTTATCT----- morL 21 2
GTGAGGGAAGCGAGTTGTT----- morL 19 1
---AGGGAAGCGAGTTGTTATCT----- morL 20 1
-----TCTTTGGTTATCTAGCTGTATGA----- mirL 23 12402
-----TCTTTGGTTATCTAGCTGTAT----- mirL 21 2914
-----TCTTTGGTTATCTAGCTGTATG----- mirL 22 2239
-----TCTTTGGTTATCTAGCTGTATGAG----- mirL 24 617

```



```

-----CTTTGGTTATCTAGCTGTATGA----- mirL 22 465
-----CTTTGGTTATCTAGCTGTAT----- mirL 20 367
-----TCTTTGGTTATCTAGCTGTA----- mirL 20 347
-----CTTTGGTTATCTAGCTGTATG----- mirL 21 286
-----TCTTTGGTTATCTAGCTGT----- mirL 19 217
-----TCTTTGGTTATCTAGCTGTATGAGT----- mirL 25 88
-----CTTTGGTTATCTAGCTGTA----- mirL 19 49
-----CTTTGGTTATCTAGCTGT----- mirL 18 30
-----CTTTGGTTATCTAGCTGTATGAG----- mirL 23 30
-----TTTGGTTATCTAGCTGTATGA----- mirL 21 19
-----TTTGGTTATCTAGCTGTATGAG----- mirL 22 13
-----TTTGGTTATCTAGCTGTATGAGT----- mirL 23 8
-----TTGGTTATCTAGCTGTATGA----- mirL 20 6
-----CTTTGGTTATCTAGCTGTATGAGT----- mirL 24 4
-----ATCTTTGGTTATCTAGCTGTATGAG----- mirL 25 4
-----ATCTTTGGTTATCTAGCTGTATGA----- mirL 24 3
-----TTGGTTATCTAGCTGTATG----- mirL 19 3
-----TTGGTTATCTAGCTGTATGAG----- mirL 21 3
-----TTTGGTTATCTAGCTGTATG----- mirL 20 2
-----TTTGGTTATCTAGCTGTAT----- mirL 19 1
-----TTTGGTTATCTAGCTGTA----- mirL 18 1
-----TATCTTTGGTTATCTAGCTGTATGA----- mirL 25 1
-----TAAAGCTAGATAACCGAAAGTA----- mirR 22 1875
-----ATAAAGCTAGATAACCGAAAGT----- mirR 22 1001
-----TAAAGCTAGATAACCGAAAGTAA----- mirR 23 456
-----ATAAAGCTAGATAACCGAAAGTA----- mirR 23 444
-----TAAAGCTAGATAACCGAAAGT----- mirR 21 334
-----TAAAGCTAGATAACCGAAAG----- mirR 20 180
-----ATAAAGCTAGATAACCGAAAGTAA----- mirR 24 98
-----ATAAAGCTAGATAACCGAAAG----- mirR 21 89
-----AAAGCTAGATAACCGAAAGTA----- mirR 21 82
-----TAAAGCTAGATAACCGAAA----- mirR 19 82
-----ATAAAGCTAGATAACCGAAA----- mirR 20 77
-----ATAAAGCTAGATAACCGAA----- mirR 19 49
-----AAGCTAGATAACCGAAAGT----- mirR 19 45
-----AAAGCTAGATAACCGAAAGTAA----- mirR 22 28
-----TAAAGCTAGATAACCGAAAGTAAA----- mirR 24 28
-----AAGCTAGATAACCGAAAG----- mirR 18 21
-----AAAGCTAGATAACCGAAAGT----- mirR 20 20
-----TAAAGCTAGATAACCGAA----- mirR 18 18
-----AGCTAGATAACCGAAAGT----- mirR 18 16
-----ATAAAGCTAGATAACCGA----- mirR 18 14
-----AAAGCTAGATAACCGAAAG----- mirR 19 12
-----AAAGCTAGATAACCGAAA----- mirR 18 9
-----AAGCTAGATAACCGAAAGTA----- mirR 20 3
-----CATAAAGCTAGATAACCGAAA----- mirR 21 2

```

```

-----AAGCTAGATAACCGAAAGTAA----- mirR 21 1
-----CATAAAGCTAGATAACCGA----- mirR 19 1
-----AGCTAGATAACCGAAAGTA----- mirR 19 1
-----CATAAAGCTAGATAACCGAAAGT----- mirR 23 1
-----CATAAAGCTAGATAACCG----- mirR 18 1
-----TAAAAACTCCTTCAAGGT----- morR 18 11
-----GTAAAAACTCCTTCAAGG----- morR 18 2
-----TAAAAACTCCTTCAAGGTC----- morR 19 1
-----AAAACCTCCTTCAAGGTCA--- morR 18 1
-----AACTCCTTCAAGGTCACC- morR 18 1
-----ACTCCTTCAAGGTCACCG morR 18 1
-----AAACTCCTTCAAGGTCAC-- morR 18 1

```

>mmu-mir-9-1

```

CAGGAGGCGGGGTTGGTTGTTATCTTTGGTTATCTAGCTGTATGAGTGGTGGAGTCTTCATAAAGCTAGATAACCGAAAGTAAA species len reads
CAGGAGGCGGGGTTGGTTG----- morL 19 1
---AGGCGGGGTTGGTTGTTA----- morL 18 1
--GGAGGCGGGGTTGGTTGTTA----- morL 20 1
-----CGGGGTTGGTTGTTATCT----- morL 18 1
-----TCTTTGGTTATCTAGCTGTATGA----- mirL 23 12402
-----TCTTTGGTTATCTAGCTGTAT----- mirL 21 2914
-----TCTTTGGTTATCTAGCTGTATG----- mirL 22 2239
-----TCTTTGGTTATCTAGCTGTATGAG----- mirL 24 617
-----CTTTGGTTATCTAGCTGTATGA----- mirL 22 465
-----CTTTGGTTATCTAGCTGTAT----- mirL 20 367
-----TCTTTGGTTATCTAGCTGTA----- mirL 20 347
-----CTTTGGTTATCTAGCTGTATG----- mirL 21 286
-----TCTTTGGTTATCTAGCTGT----- mirL 19 217
-----TCTTTGGTTATCTAGCTGTATGAGT----- mirL 25 88
-----CTTTGGTTATCTAGCTGTA----- mirL 19 49
-----CTTTGGTTATCTAGCTGTATGAG----- mirL 23 30
-----CTTTGGTTATCTAGCTGT----- mirL 18 30
-----TTTGTTATCTAGCTGTATGA----- mirL 21 19
-----TTTGTTATCTAGCTGTATGAG----- mirL 22 13
-----TTTGTTATCTAGCTGTATGAGT----- mirL 23 8
-----TTGGTTATCTAGCTGTATGA----- mirL 20 6
-----CTTTGGTTATCTAGCTGTATGAGT----- mirL 24 4
-----ATCTTTGGTTATCTAGCTGTATGAG----- mirL 25 4
-----TTGGTTATCTAGCTGTATG----- mirL 19 3
-----TTGGTTATCTAGCTGTATGAG----- mirL 21 3
-----ATCTTTGGTTATCTAGCTGTATGA----- mirL 24 3
-----TTTGTTATCTAGCTGTATG----- mirL 20 2
-----TTTGTTATCTAGCTGTAT----- mirL 19 1
-----TTTGTTATCTAGCTGTA----- mirL 18 1
-----TATCTTTGGTTATCTAGCTGTATGA----- mirL 25 1
-----GAGTGGTGGAGTCTTC----- loop 18 1

```

```

-----TAAAGCTAGATAACCGAAAGTA-- mirR 22 1875
-----ATAAAGCTAGATAACCGAAAGT--- mirR 22 1001
-----TAAAGCTAGATAACCGAAAGTAA- mirR 23 456
-----ATAAAGCTAGATAACCGAAAGTA-- mirR 23 444
-----TAAAGCTAGATAACCGAAAGT--- mirR 21 334
-----TAAAGCTAGATAACCGAAAG--- mirR 20 180
-----ATAAAGCTAGATAACCGAAAGTAA- mirR 24 98
-----ATAAAGCTAGATAACCGAAAG--- mirR 21 89
-----TAAAGCTAGATAACCGAAA----- mirR 19 82
-----AAAGCTAGATAACCGAAAGTA-- mirR 21 82
-----ATAAAGCTAGATAACCGAAA----- mirR 20 77
-----ATAAAGCTAGATAACCGAA----- mirR 19 49
-----AAGCTAGATAACCGAAAGT--- mirR 19 45
-----AAAGCTAGATAACCGAAAGTAA- mirR 22 28
-----TAAAGCTAGATAACCGAAAGTAAA mirR 24 28
-----AAGCTAGATAACCGAAAG--- mirR 18 21
-----AAAGCTAGATAACCGAAAGT--- mirR 20 20
-----TAAAGCTAGATAACCGAA----- mirR 18 18
-----AGCTAGATAACCGAAAGT--- mirR 18 16
-----ATAAAGCTAGATAACCGA----- mirR 18 14
-----AAAGCTAGATAACCGAAAG--- mirR 19 12
-----AAAGCTAGATAACCGAAA----- mirR 18 9
-----AAGCTAGATAACCGAAAGTA-- mirR 20 3
-----CATAAAGCTAGATAACCGAAA----- mirR 21 2
-----AAGCTAGATAACCGAAAGTAA- mirR 21 1
-----CATAAAGCTAGATAACCG----- mirR 18 1
-----AGCTAGATAACCGAAAGTA-- mirR 19 1
-----CATAAAGCTAGATAACCGAAAGT--- mirR 23 1
-----CATAAAGCTAGATAACCGA----- mirR 19 1

```

>mmu-mir-505

```

AGTAAATTGATGCACCCAGTGGGGAGCCAGGAAGTATTGATGTTTCTGCCAGGTTAGCGTCAACACTTGCTGGTTTTCTCTCTGGAGTATCACCAA species len reads
-GTAAATTGATGCACCCAGTGG----- morL 21 7
----AATTGATGCACCCAGTGGG----- morL 20 2
----AATTGATGCACCCAGTGG----- morL 18 2
AGTAAATTGATGCACCCAGTGG----- morL 23 1
----ATTGATGCACCCAGTGGG----- morL 18 1
-----GGGAGCCAGGAAGTATTGATGTT----- mirL 23 2524
-----GGGAGCCAGGAAGTATTGATGT----- mirL 22 830
-----GGGAGCCAGGAAGTATTGATGTT----- mirL 24 512
-----GGGAGCCAGGAAGTATTGATG----- mirL 21 223
-----GGGAGCCAGGAAGTATTGA----- mirL 19 22
-----GGGAGCCAGGAAGTATTGATGTTTC----- mirL 25 21
-----GGGAGCCAGGAAGTATTG----- mirL 18 19
-----GGAGCCAGGAAGTATTGATGT----- mirL 21 18
-----GGAGCCAGGAAGTATTGATGTT----- mirL 22 18

```

```
-----GAGCCAGGAAGTATTGATGTT----- mirL 21 10
-----GAGCCAGGAAGTATTGATGT----- mirL 20 5
-----AGCCAGGAAGTATTGATGTT----- mirL 20 3
-----GGGGAGCCAGGAAGTATT----- mirL 18 1
-----TGGGGGAGCCAGGAAGTAT----- mirL 19 1
-----GGGGAGCCAGGAAGTATTGATGTT----- mirL 24 1
-----GGGGGAGCCAGGAAGTATT----- mirL 19 1
-----TGGGGGAGCCAGGAAGTA----- mirL 18 1
-----CGTCAACACTTGCTGGTTTTCTCT----- mirR 24 4739
-----GTCAACACTTGCTGGTTTTCTC----- mirR 22 4060
-----CGTCAACACTTGCTGGTTTTCT----- mirR 22 4013
-----GTCAACACTTGCTGGTTTTCT----- mirR 20 2112
-----CGTCAACACTTGCTGGTTTTCT----- mirR 21 1671
-----CGTCAACACTTGCTGGTTTTCTC----- mirR 23 931
-----GTCAACACTTGCTGGTTTTCT----- mirR 21 854
-----GTCAACACTTGCTGGTTTT----- mirR 19 590
-----GTCAACACTTGCTGGTTTTCTCT----- mirR 23 415
-----CGTCAACACTTGCTGGTTTTCTCTC----- mirR 25 307
-----CGTCAACACTTGCTGGTTTT----- mirR 20 201
-----GTCAACACTTGCTGGTTTTCTCTC----- mirR 24 189
-----TCAACACTTGCTGGTTTTCTCT----- mirR 22 135
-----CGTCAACACTTGCTGGTTTT----- mirR 19 98
-----GTCAACACTTGCTGGTTTT----- mirR 18 92
-----TCAACACTTGCTGGTTTTCTCTC----- mirR 23 92
-----TCAACACTTGCTGGTTTTCTC----- mirR 21 76
-----TCAACACTTGCTGGTTTTCT----- mirR 20 58
-----CAACACTTGCTGGTTTTCT----- mirR 18 38
-----TCAACACTTGCTGGTTTTCTCTC----- mirR 24 36
-----TCAACACTTGCTGGTTTTCT----- mirR 19 35
-----CAACACTTGCTGGTTTTCT----- mirR 19 26
-----CAACACTTGCTGGTTTTCTCT----- mirR 21 22
-----CAACACTTGCTGGTTTTCTC----- mirR 20 13
-----TCAACACTTGCTGGTTTT----- mirR 18 6
-----GCGTCAACACTTGCTGGTTTTCT----- mirR 23 5
-----CAACACTTGCTGGTTTTCTCTC----- mirR 22 4
-----TAGCGTCAACACTTGCTGGT----- mirR 20 3
-----CAACACTTGCTGGTTTTCTCTC----- mirR 23 3
-----TAGCGTCAACACTTGCTGGTTTT----- mirR 23 2
-----TAGCGTCAACACTTGCTGGT----- mirR 21 2
-----GCGTCAACACTTGCTGGTTTTCT----- mirR 22 1
-----TCTCTGGAGTATCACCAA morR 18 1

>mmu-mir-429
GGGAGGCCCTTGACTGCCCTGCTGATGGATGTCTTACCAGACATGGTTAGATCTGGATGCATCTGTCTAATACTGTCTGGTAATGCCGTCCATCCACGGCCTTATCACCGCTGGAGACGAC species len read
-----CCCTTGACTGCCCTGCTGATGGAT----- morL 25 11
-----TGTACTGCCCTGCTGATGGAT----- morL 21 8
```

```

-----GCCCTTGACTGCCCTGCTGATGGAT----- morL 26 5
-----TTGACTGCCCTGCTGATGGAT----- morL 22 3
-----GTACTGCCCTGCTGATGGAT----- morL 20 3
-----TACTGCCCTGCTGATGGAT----- morL 19 2
-----CTTGACTGCCCTGCTGATGGAT----- morL 23 2
-----GTACTGCCCTGCTGATGGATGT----- morL 22 1
GGGAGGCCCTTGACTGCCCTGCTGATGGATGT----- morL 33 1
GGGAGGCCCTTGACTGCCCTGCTGATGGAT----- morL 30 1
-----GCCCTTGACTGCCCTGCTGATGGATGTC----- morL 29 1
-----CCCTTGACTGCCCTGCTGATGGAT----- morL 24 1
-----GCCCTTGACTGCCCTGCTGATGGAT----- morL 25 1
-----GTCTTACCAGACATGGTTAGA----- mirL 21 54
-----GTCTTACCAGACATGGTTA----- mirL 19 5
-----GTCTTACCAGACATGGTTAG----- mirL 20 3
-----GTCTTACCAGACATGGTTAGATCTGGATGC----- mirL 30 1
-----ATGTCTTACCAGACATGGT----- mirL 19 1
-----AGATCTGGATGCATCTGT----- loop 18 5
-----TAATACTGTCTGGTAATGCCGT----- mirR 22 16104
-----TAATACTGTCTGGTAATGCCGTC----- mirR 23 3421
-----AATACTGTCTGGTAATGCCGT----- mirR 21 1545
-----TAATACTGTCTGGTAATGCCG----- mirR 21 1273
-----TAATACTGTCTGGTAATGCCGTCC----- mirR 24 621
-----AATACTGTCTGGTAATGCCGTC----- mirR 22 458
-----TAATACTGTCTGGTAATGC----- mirR 19 240
-----TAATACTGTCTGGTAATGCC----- mirR 20 133
-----CTAATACTGTCTGGTAATGCCGT----- mirR 23 124
-----AATACTGTCTGGTAATGCCG----- mirR 20 77
-----AATACTGTCTGGTAATGCCGTCC----- mirR 23 66
-----TAATACTGTCTGGTAATGCCGTCCA----- mirR 25 59
-----ATACTGTCTGGTAATGCCGT----- mirR 20 38
-----CTAATACTGTCTGGTAATGCCG----- mirR 22 28
-----CTAATACTGTCTGGTAATGCCGTC----- mirR 24 20
-----TACTGTCTGGTAATGCCGT----- mirR 19 19
-----ATACTGTCTGGTAATGCCG----- mirR 19 17
-----AATACTGTCTGGTAATGC----- mirR 18 12
-----AATACTGTCTGGTAATGCCGTCCA----- mirR 24 11
-----AATACTGTCTGGTAATGCC----- mirR 19 11
-----ATACTGTCTGGTAATGCCGTC----- mirR 21 2
-----CTAATACTGTCTGGTAATGCC----- mirR 21 1
-----CTAATACTGTCTGGTAATGC----- mirR 20 1
-----ATACTGTCTGGTAATGCCGTCC----- mirR 22 1
-----CCATCCACGGCCTTATCACCGCTGGAGACGAC morR 32 2
-----CCATCCACGGCCTTATCACCC----- morR 20 2
-----ATCCACGGCCTTATCACCGCT----- morR 21 1
-----CCATCCACGGCCTTATCACCGCTGGAGACGA morR 31 1
-----TCCACGGCCTTATCACCG----- morR 18 1

```

>mmu-mir-195

| ACACCCA | ACTCTCCTGGCT               | TAGCAGCACAGAAATATTGGCATGGGGAAGTGAGTCTGCCAATATTGGCTGTGCTGCTCCAGGCAGGGTGGTGAGAGCT | species | len | reads |
|---------|----------------------------|---------------------------------------------------------------------------------|---------|-----|-------|
| ACACCCA | ACTCTCCTGGCT               | -----                                                                           | morL    | 19  | 8     |
| ---     | CCCAACTCTCCTGGCTCT         | -----                                                                           | morL    | 18  | 1     |
| -CACCCA | ACTCTCCTGGCTC              | -----                                                                           | morL    | 19  | 1     |
| -----   | TAGCAGCACAGAAATATTGGCA     | -----                                                                           | mirL    | 22  | 16084 |
| -----   | TAGCAGCACAGAAATATTGGCAT    | -----                                                                           | mirL    | 23  | 3372  |
| -----   | TAGCAGCACAGAAATATTGGCATG   | -----                                                                           | mirL    | 24  | 744   |
| -----   | TAGCAGCACAGAAATATTGGC      | -----                                                                           | mirL    | 21  | 582   |
| -----   | AGCAGCACAGAAATATTGGCA      | -----                                                                           | mirL    | 21  | 346   |
| -----   | TAGCAGCACAGAAATATTGG       | -----                                                                           | mirL    | 20  | 267   |
| -----   | AGCAGCACAGAAATATTGGCAT     | -----                                                                           | mirL    | 22  | 232   |
| -----   | TAGCAGCACAGAAATATTGGCATGG  | -----                                                                           | mirL    | 25  | 131   |
| -----   | TAGCAGCACAGAAATATTG        | -----                                                                           | mirL    | 19  | 101   |
| -----   | AGCAGCACAGAAATATTGGCATG    | -----                                                                           | mirL    | 23  | 59    |
| -----   | AGCAGCACAGAAATATTGGC       | -----                                                                           | mirL    | 20  | 18    |
| -----   | CTAGCAGCACAGAAATATTGGCA    | -----                                                                           | mirL    | 23  | 10    |
| -----   | GCAGCACAGAAATATTGGCAT      | -----                                                                           | mirL    | 21  | 8     |
| -----   | GCAGCACAGAAATATTGGCATG     | -----                                                                           | mirL    | 22  | 7     |
| -----   | AGCAGCACAGAAATATTGGCATGG   | -----                                                                           | mirL    | 24  | 6     |
| -----   | AGCAGCACAGAAATATTG         | -----                                                                           | mirL    | 18  | 4     |
| -----   | AGCAGCACAGAAATATTGG        | -----                                                                           | mirL    | 19  | 2     |
| -----   | GCAGCACAGAAATATTGG         | -----                                                                           | mirL    | 18  | 1     |
| -----   | GCAGCACAGAAATATTGGCA       | -----                                                                           | mirL    | 20  | 1     |
| -----   | CAGCACAGAAATATTGGC         | -----                                                                           | mirL    | 18  | 1     |
| -----   | CTCTAGCAGCACAGAAATA        | -----                                                                           | mirL    | 19  | 1     |
| -----   | CTAGCAGCACAGAAATATTGGCATG  | -----                                                                           | mirL    | 25  | 1     |
| -----   | CAGCACAGAAATATTGGCA        | -----                                                                           | mirL    | 19  | 1     |
| -----   | ATGGGGAAGTGAGTCTGC         | -----                                                                           | loop    | 18  | 4     |
| -----   | TGGGGAAGTGAGTCTGCC         | -----                                                                           | loop    | 18  | 1     |
| -----   | CCAATATTGGCTGTGCTGCTCC     | -----                                                                           | mirR    | 22  | 1260  |
| -----   | CCAATATTGGCTGTGCTGCTCCA    | -----                                                                           | mirR    | 23  | 593   |
| -----   | CCAATATTGGCTGTGCTGCTC      | -----                                                                           | mirR    | 21  | 87    |
| -----   | CAATATTGGCTGTGCTGCTCC      | -----                                                                           | mirR    | 21  | 48    |
| -----   | CCAATATTGGCTGTGCTGCTCCAG   | -----                                                                           | mirR    | 24  | 38    |
| -----   | CAATATTGGCTGTGCTGCTCCA     | -----                                                                           | mirR    | 22  | 38    |
| -----   | CCAATATTGGCTGTGCTGCT       | -----                                                                           | mirR    | 20  | 25    |
| -----   | CCAATATTGGCTGTGCTGCTCCAGG  | -----                                                                           | mirR    | 25  | 10    |
| -----   | CCAATATTGGCTGTGCTGCTCCAGGC | -----                                                                           | mirR    | 26  | 10    |
| -----   | AATATTGGCTGTGCTGCTCC       | -----                                                                           | mirR    | 20  | 7     |
| -----   | CAATATTGGCTGTGCTGCTC       | -----                                                                           | mirR    | 20  | 7     |
| -----   | ATATTGGCTGTGCTGCTC         | -----                                                                           | mirR    | 18  | 3     |
| -----   | ATATTGGCTGTGCTGCTCC        | -----                                                                           | mirR    | 19  | 2     |
| -----   | CAATATTGGCTGTGCTGCTCCAG    | -----                                                                           | mirR    | 23  | 2     |
| -----   | AATATTGGCTGTGCTGCTCCA      | -----                                                                           | mirR    | 21  | 1     |

```

-----GCCAATATTGGCTGTGCTGCTCCA----- mirR 24 1
-----GCCAATATTGGCTGTGCT----- mirR 18 1
-----AGGCAGGGTGGTGAGAGCT morR 19 2
-----AGGCAGGGTGGTGAGAGC- morR 18 2
-----CCAGGCAGGGTGGTGAGA--- morR 18 2
-----CAGGCAGGGTGGTGAGAGC- morR 19 1
-----GGCAGGGTGGTGAGAGCT morR 18 1

>mmu-mir-700
GTAAGGCTCCTTCCCTGTGCTTGCAGGGGAGAAATACGAACTGCACGCGGAACCGAGTCCACCCCAAGTGTGGTGGTGACAGTCTGTGAGAGCGAA species len reads
-TAAGGCTCCTTCCCTGTGCTTGCAG----- mirL 23 2424
-TAAGGCTCCTTCCCTGTGCTTGC----- mirL 22 1492
-TAAGGCTCCTTCCCTGTGCTTGCAGG----- mirL 25 1101
-TAAGGCTCCTTCCCTGTGCTTGCAG----- mirL 24 575
-TAAGGCTCCTTCCCTGTGCTTGCAGGG----- mirL 26 173
-TAAGGCTCCTTCCCTGTGCTTGC----- mirL 21 159
--AAGGCTCCTTCCCTGTGCTTGCAG----- mirL 22 143
--AAGGCTCCTTCCCTGTGCTTGC----- mirL 21 123
-TAAGGCTCCTTCCCTGTGCTTGC----- mirL 20 73
--AAGGCTCCTTCCCTGTGCTTGCAG----- mirL 23 51
--AAGGCTCCTTCCCTGTGCTTGCAGG----- mirL 24 51
--AAGGCTCCTTCCCTGTGCTTGCAGGG----- mirL 25 24
--AAGGCTCCTTCCCTGTGCTTGC----- mirL 19 7
--AAGGCTCCTTCCCTGTGCTTGC----- mirL 20 7
---GGCTCCTTCCCTGTGCTTGC----- mirL 18 1
GTAAGGCTCCTTCCCTGTGCT----- mirL 19 1
---AGGCTCCTTCCCTGTGCTTGC----- mirL 19 1
GTAAGGCTCCTTCCCTGTG----- mirL 18 1
GTAAGGCTCCTTCCCTGTGCTTGCAGG----- mirL 26 1
-----GGGGAGAAATACGAACTG----- loop 18 100
-----GGGGAGAAATACGAACTGC----- loop 19 4
-----AGGGGAGAAATACGAACTG----- loop 19 1
-----CACGCGGGAACCGAGTCCACC----- mirR 21 8110
-----CACGCGGGAACCGAGTCCAC----- mirR 20 2776
-----CACGCGGGAACCGAGTCCACCC----- mirR 22 2209
-----CACGCGGGAACCGAGTCCA----- mirR 19 1117
-----CACGCGGGAACCGAGTCCACCCC----- mirR 23 767
-----CACGCGGGAACCGAGTCCACCCCC----- mirR 24 465
-----GCACGCGGGAACCGAGTCCACC----- mirR 22 252
-----GCACGCGGGAACCGAGTCCAC----- mirR 21 223
-----CGCGGGAACCGAGTCCACC----- mirR 19 123
-----ACGCGGGAACCGAGTCCACC----- mirR 20 114
-----CACGCGGGAACCGAGTCCACCCCA----- mirR 25 93
-----GCACGCGGGAACCGAGTCCACCC----- mirR 23 89
-----GCACGCGGGAACCGAGTCCA----- mirR 20 63
-----GCGGGAACCGAGTCCACC----- mirR 18 58

```

```

-----GCACGCGGGAACCGAGTCCACCCC----- mirR 24 49
-----GCACGCGGGAACCGAGTCCACCCC----- mirR 25 28
-----TGCACGCGGGAACCGAGTCCAC----- mirR 22 24
-----ACGCGGGAACCGAGTCCAC----- mirR 19 21
-----CGCGGGAACCGAGTCCAC----- mirR 18 14
-----GCACGCGGGAACCGAGTCC----- mirR 19 9
-----TGCACGCGGGAACCGAGTCCACC----- mirR 23 8
-----TGCACGCGGGAACCGAGTCCA----- mirR 21 7
-----ACGCGGGAACCGAGTCCA----- mirR 18 7
-----ACGCGGGAACCGAGTCCACCC----- mirR 21 3
-----CTGCACGCGGGAACCGAGTCCAC----- mirR 23 1
-----CTGCACGCGGGAACCGAG----- mirR 18 1
-----ACGCGGGAACCGAGTCCACCCC----- mirR 22 1
-----CCAGTGTGGTGGTGCACGT----- morR 19 6
-----ACCCCCAGTGTGGTGGTG----- morR 18 3
-----CCCAGTGTGGTGGTGCAC----- morR 18 3
-----ACCCCCAGTGTGGTGGTGC----- morR 19 2
-----CCCAGTGTGGTGGTGCACGTCTGTGAGAGCGAA morR 33 2
-----CCCCAGTGTGGTGGTGCACGT----- morR 21 2
-----CAGTGTGGTGGTGCACGTC----- morR 19 1
-----CCCAGTGTGGTGGTGCACGTCTGTGAG----- morR 27 1
-----CCCAGTGTGGTGGTGCACGTCTGTGAGAGC--- morR 30 1
-----CCCAGTGTGGTGGTGCACGTCT----- morR 22 1
-----CCCCAGTGTGGTGGTGC----- morR 18 1
-----CCCAGTGTGGTGGTGCACGT----- morR 20 1
-----AGTGTGGTGGTGCACGTC----- morR 18 1

>mmu-mir-433
AGAAGAAGACCCAATGCCCGGGGAGAAGTACGGTGAGCCTGTCATTATTTCAGAGAGGCTAGATCCTCTGTGTTGAGAAGGATCATGATGGGCTCCTCGGTGTTCTCCAGGTAGCGGCACCACACCA species len
-----ACCCAATGCCCGGGGAGAAG----- morL 20 32
-----CCCAATGCCCGGGGAGAAG----- morL 19 16
-----GACCCAATGCCCGGGGAGAAG----- morL 21 13
-----AGACCCAATGCCCGGGGAGAAG----- morL 22 8
-----ACCCAATGCCCGGGGAGAA----- morL 19 3
-----ACCCAATGCCCGGGGAGAAGT----- morL 21 3
-----CCAATGCCCGGGGAGAAG----- morL 18 2
-----CCCAATGCCCGGGGAGAAGT----- morL 20 2
-----AGACCCAATGCCCGGGGAGAA----- morL 21 1
-----ACCCAATGCCCGGGGAGA----- morL 18 1
-----AATGCCCGGGGAGAAGTAC----- morL 19 1
-----ATGCCCGGGGAGAAGTAC----- morL 18 1
AGAAGAAGACCCAATGCCCGGGGAGAAG----- morL 28 1
-----GACCCAATGCCCGGGGAG----- morL 18 1
-----AGACCCAATGCCCGGGGAG----- morL 19 1
-----TACGGTGAGCCTGTCATTATC----- mirL 22 964
-----TACGGTGAGCCTGTCATTAT----- mirL 21 474

```



|                                      |      |    |       |
|--------------------------------------|------|----|-------|
| -----TACGGTGAGCCTGTCATTA-----        | mirL | 19 | 102   |
| -----TACGGTGAGCCTGTCATTAT-----       | mirL | 20 | 68    |
| -----TACGGTGAGCCTGTCATT-----         | mirL | 18 | 67    |
| -----TACGGTGAGCCTGTCATTATTCA-----    | mirL | 23 | 47    |
| -----ACGGTGAGCCTGTCATTATTC-----      | mirL | 21 | 22    |
| -----TACGGTGAGCCTGTCATTATTCAG-----   | mirL | 24 | 14    |
| -----GGTGAGCCTGTCATTATTC-----        | mirL | 19 | 13    |
| -----CGGTGAGCCTGTCATTATT-----        | mirL | 19 | 10    |
| -----CGGTGAGCCTGTCATTATTC-----       | mirL | 20 | 4     |
| -----ACGGTGAGCCTGTCATTAT-----        | mirL | 19 | 4     |
| -----ACGGTGAGCCTGTCATTATTCA-----     | mirL | 22 | 4     |
| -----ACGGTGAGCCTGTCATTA-----         | mirL | 18 | 2     |
| -----GTACGGTGAGCCTGTCATTATTC-----    | mirL | 23 | 2     |
| -----AAGTACGGTGAGCCTGTC-----         | mirL | 18 | 2     |
| -----ACGGTGAGCCTGTCATTATT-----       | mirL | 20 | 2     |
| -----ATCATGATGGGCTCCTCGGTGT-----     | mirR | 22 | 14936 |
| -----ATCATGATGGGCTCCTCGGTGTT-----    | mirR | 23 | 1275  |
| -----TCATGATGGGCTCCTCGGTGT-----      | mirR | 21 | 1018  |
| -----ATCATGATGGGCTCCTCGGTG-----      | mirR | 21 | 942   |
| -----ATCATGATGGGCTCCTCGGTGTTC-----   | mirR | 24 | 910   |
| -----ATCATGATGGGCTCCTCGGT-----       | mirR | 20 | 610   |
| -----ATCATGATGGGCTCCTCGG-----        | mirR | 19 | 361   |
| -----ATCATGATGGGCTCCTCGGTGTTCT-----  | mirR | 25 | 323   |
| -----GATCATGATGGGCTCCTCGGTGT-----    | mirR | 23 | 265   |
| -----CATGATGGGCTCCTCGGTGT-----       | mirR | 20 | 143   |
| -----TCATGATGGGCTCCTCGGTGTT-----     | mirR | 22 | 120   |
| -----TCATGATGGGCTCCTCGGTGTTC-----    | mirR | 23 | 60    |
| -----GATCATGATGGGCTCCTCGGTG-----     | mirR | 22 | 37    |
| -----TCATGATGGGCTCCTCGGTG-----       | mirR | 20 | 35    |
| -----TCATGATGGGCTCCTCGGT-----        | mirR | 19 | 32    |
| -----TCATGATGGGCTCCTCGGTGTTCT-----   | mirR | 24 | 27    |
| -----TCATGATGGGCTCCTCGG-----         | mirR | 18 | 19    |
| -----CATGATGGGCTCCTCGGTGTTC-----     | mirR | 22 | 13    |
| -----GATCATGATGGGCTCCTCGGTGTT-----   | mirR | 24 | 11    |
| -----GATCATGATGGGCTCCTCGGT-----      | mirR | 21 | 10    |
| -----CATGATGGGCTCCTCGGTGTT-----      | mirR | 21 | 10    |
| -----CATGATGGGCTCCTCGGTG-----        | mirR | 19 | 8     |
| -----CATGATGGGCTCCTCGGT-----         | mirR | 18 | 7     |
| -----GATCATGATGGGCTCCTCGG-----       | mirR | 20 | 4     |
| -----AGGATCATGATGGGCTCCT-----        | mirR | 19 | 4     |
| -----ATGATGGGCTCCTCGGTGTTC-----      | mirR | 21 | 3     |
| -----AGGATCATGATGGGCTCC-----         | mirR | 18 | 2     |
| -----ATGATGGGCTCCTCGGTGT-----        | mirR | 19 | 2     |
| -----GATCATGATGGGCTCCTCGGTGTTC-----  | mirR | 25 | 1     |
| -----GATCATGATGGGCTCCTC-----         | mirR | 18 | 1     |
| -----CATGATGGGCTCCTCGGTGTTCTCCA----- | mirR | 26 | 1     |

```

-----GGATCATGATGGGCTCCT----- mirR 18 1
-----CATGATGGGCTCCTCGGTGTTCT----- mirR 23 1
-----GGATCATGATGGGCTCCTC----- mirR 19 1
-----TCTCCAGGTAGCGGCACCACACC----- morR 23 9
-----TCTCCAGGTAGCGGCACC----- morR 18 3
-----CTCCAGGTAGCGGCACCA----- morR 18 2
-----TCTCCAGGTAGCGGCACCACAC-- morR 22 2
-----TCTCCAGGTAGCGGCACCACA--- morR 21 2
-----TCTCCAGGTAGCGGCACCA---- morR 19 2
-----TCTCCAGGTAGCGGCACCACCA morR 24 1
-----TTCTCCAGGTAGCGGCAC----- morR 18 1

```

>mmu-mir-139

| CCAGGACAGGCGCAGGTGTATTCTACAGTGCACGTGTCTCCAGTGTGGCTCGGAGGCTGGAGACGCGGCCCTGTTGGAGTAACAACCTGAAGCCAGAGTCT | species | len | reads |
|-------------------------------------------------------------------------------------------------------|---------|-----|-------|
| CCAGGACAGGCGCAGGTGTAT-----                                                                            | morL    | 21  | 5     |
| -CAGGACAGGCGCAGGTGTAT-----                                                                            | morL    | 20  | 2     |
| --AGGACAGGCGCAGGTGTATTC-----                                                                          | morL    | 21  | 2     |
| --AGGACAGGCGCAGGTGTA-----                                                                             | morL    | 18  | 1     |
| CCAGGACAGGCGCAGGTG-----                                                                               | morL    | 18  | 1     |
| ----GACAGGCGCAGGTGTATT-----                                                                           | morL    | 18  | 1     |
| -----TCTACAGTGCACGTGTCTCCAGT-----                                                                     | mirL    | 23  | 11677 |
| -----TCTACAGTGCACGTGTCTCCAG-----                                                                      | mirL    | 22  | 4120  |
| -----TCTACAGTGCACGTGTCT-----                                                                          | mirL    | 18  | 2395  |
| -----TCTACAGTGCACGTGTCTCCAGTG-----                                                                    | mirL    | 24  | 1688  |
| -----TCTACAGTGCACGTGTCTCCA-----                                                                       | mirL    | 21  | 1010  |
| -----TCTACAGTGCACGTGTCTCCAGTGT-----                                                                   | mirL    | 25  | 842   |
| -----TCTACAGTGCACGTGTCTCC-----                                                                        | mirL    | 20  | 368   |
| -----CTACAGTGCACGTGTCTCCAGT-----                                                                      | mirL    | 22  | 185   |
| -----CTACAGTGCACGTGTCTCCAG-----                                                                       | mirL    | 21  | 137   |
| -----CTACAGTGCACGTGTCTCCAGTG-----                                                                     | mirL    | 23  | 47    |
| -----CTACAGTGCACGTGTCTCCAGTGT-----                                                                    | mirL    | 24  | 42    |
| -----CTACAGTGCACGTGTCTCCA-----                                                                        | mirL    | 20  | 41    |
| -----CTACAGTGCACGTGTCTCC-----                                                                         | mirL    | 19  | 23    |
| -----ACAGTGCACGTGTCTCCAGT-----                                                                        | mirL    | 20  | 8     |
| -----TTCTACAGTGCACGTGTCT-----                                                                         | mirL    | 19  | 7     |
| -----CTACAGTGCACGTGTCTC-----                                                                          | mirL    | 18  | 6     |
| -----TTCTACAGTGCACGTGTCTCCAGT-----                                                                    | mirL    | 24  | 3     |
| -----TTCTACAGTGCACGTGTCTCCAG-----                                                                     | mirL    | 23  | 2     |
| -----TACAGTGCACGTGTCTCCAG-----                                                                        | mirL    | 20  | 2     |
| -----ACAGTGCACGTGTCTCCAGTG-----                                                                       | mirL    | 21  | 1     |
| -----AGTGTGGCTCGGAGGCTGG-----                                                                         | loop    | 19  | 4     |
| -----TGGAGACGCGGCCCTGTTGGAG-----                                                                      | mirR    | 22  | 125   |
| -----GGAGACGCGGCCCTGTTGGAGT-----                                                                      | mirR    | 22  | 84    |
| -----GGAGACGCGGCCCTGTTGGAG-----                                                                       | mirR    | 21  | 49    |
| -----TGGAGACGCGGCCCTGTTGGAGT-----                                                                     | mirR    | 23  | 36    |
| -----AGACGCGGCCCTGTTGGAG-----                                                                         | mirR    | 19  | 19    |

```

-----AGACGCGGCCCTGTTGGAGT----- mirR 20 12
-----TGGAGACGCGGCCCTGTTG----- mirR 19 11
-----TGGAGACGCGGCCCTGTTGGAGTA----- mirR 24 10
-----GGAGACGCGGCCCTGTTG----- mirR 18 9
-----TGGAGACGCGGCCCTGTTGGAGTAA----- mirR 25 7
-----AGACGCGGCCCTGTTGGAGTAA----- mirR 22 6
-----TGGAGACGCGGCCCTGTTGG----- mirR 20 6
-----GCTGGAGACGCGGCCCTG----- mirR 18 4
-----GGAGACGCGGCCCTGTTGGAGTA----- mirR 23 3
-----TGGAGACGCGGCCCTGTT----- mirR 18 2
-----GGAGACGCGGCCCTGTTGGAGTAA----- mirR 24 2
-----AGACGCGGCCCTGTTGGAGTAA----- mirR 23 2
-----GGAGACGCGGCCCTGTTGGA----- mirR 20 1
-----GGAGACGCGGCCCTGTTGG----- mirR 19 1
-----GAGACGCGGCCCTGTTGG----- mirR 18 1
-----GAGACGCGGCCCTGTTGGAGT----- mirR 21 1
-----CAACTGAAGCCAGAGTCT morR 18 2
-----TAACAAGCCAGAGAG--- morR 18 1
-----ACAAGCCAGAGTC- morR 18 1

```

>mmu-mir-129-1

```

CCACAGCTGTCTCCTTTGGATCTTTTGGCGGTCTGGGCTTGCTGTTCTCTCGACAGTAGTCAGGAAGCCCTTACCCCAAAAGTATCTACGGGAGGCTTGGTCTAC species len reads
CCACAGCTGTCTCCTTTG----- morL 18 14
-CACAGCTGTCTCCTTTGG----- morL 18 1
-----CTGTCTCCTTTGGATCTT----- morL 18 1
--ACAGCTGTCTCCTTTGGA----- morL 18 1
-CACAGCTGTCTCCTTTGGATC----- morL 21 1
-----GCTGTCTCCTTTGGATCT----- morL 18 1
---AGCTGTCTCCTTTGGATC----- morL 18 1
-----CTTTTGGCGGTCTGGGCTTGC----- mirL 21 8276
-----CTTTTGGCGGTCTGGGCTTGCT----- mirL 22 7053
-----CTTTTGGCGGTCTGGGCTTG----- mirL 20 1244
-----CTTTTGGCGGTCTGGGCTTGCTG----- mirL 23 646
-----CTTTTGGCGGTCTGGGCTTGCTGT----- mirL 24 141
-----CTTTTGGCGGTCTGGGCT----- mirL 18 92
-----CTTTTGGCGGTCTGGGCTT----- mirL 19 82
-----TTTGGCGGTCTGGGCTTGCT----- mirL 21 38
-----TTGGCGGTCTGGGCTTGCT----- mirL 19 24
-----TCTTTTGGCGGTCTGGGCTTGCT----- mirL 23 20
-----TTTTGGCGGTCTGGGCTTGC----- mirL 20 15
-----TCTTTTGGCGGTCTGGGCTTGC----- mirL 22 14
-----TTTGGCGGTCTGGGCTTGCT----- mirL 20 14
-----TTTGGCGGTCTGGGCTTGC----- mirL 19 14
-----TTTTGGCGGTCTGGGCTTG----- mirL 19 9
-----ATCTTTTGGCGGTCTGGGCTTGC----- mirL 23 8
-----TTTGGCGGTCTGGGCTTGC----- mirL 18 3

```

```

-----TCTTTTTGCGGTCTGGGC----- mirL 18 2
-----TTTTGCGGTCTGGGCTTGCTG----- mirL 22 2
-----ATCTTTTTGCGGTCTGGGCTTGCT----- mirL 24 2
-----GATCTTTTTGCGGTCTGG----- mirL 18 1
-----TTTTGCGGTCTGGGCTTGCTGTT----- mirL 24 1
-----TTTTGCGGTCTGGGCTT----- mirL 18 1
-----TCTTTTTGCGGTCTGGGCTTGCTG----- mirL 24 1
-----TGTTCTCTCGACAGTAGTCAGGA----- loop 23 1
-----TGCTGTTCCTCGACAGTAGTC----- loop 22 1
-----TGTTCTCTCGACAGTAGTCAGG----- loop 22 1
-----AAGCCCTTACCCCAAAAAGTAT----- mirR 22 2809
-----AAGCCCTTACCCCAAAAAGTATC----- mirR 23 963
-----AAGCCCTTACCCCAAAAAGTA----- mirR 21 687
-----AAGCCCTTACCCCAAAAAGT----- mirR 20 175
-----AAGCCCTTACCCCAAAAAG----- mirR 19 104
-----GAAGCCCTTACCCCAAAAAGT----- mirR 21 92
-----AAGCCCTTACCCCAAAA----- mirR 18 91
-----GGAAGCCCTTACCCCAAAAAGTAT----- mirR 24 66
-----AAGCCCTTACCCCAAAAAGTATCT----- mirR 24 55
-----GAAGCCCTTACCCCAAAAAGTA----- mirR 22 48
-----GGAAGCCCTTACCCCAAAAAGT----- mirR 22 33
-----AGCCCTTACCCCAAAAAGTAT----- mirR 21 24
-----GGAAGCCCTTACCCCAAAAAGTA----- mirR 23 23
-----GAAGCCCTTACCCCAAAAAG----- mirR 20 11
-----GAAGCCCTTACCCCAAAAAGTAT----- mirR 23 10
-----CCCTTACCCCAAAAAGTAT----- mirR 19 9
-----AGCCCTTACCCCAAAAAGTATC----- mirR 22 8
-----GGAAGCCCTTACCCCAAAA----- mirR 20 5
-----AGCCCTTACCCCAAAAAGT----- mirR 19 5
-----AGCCCTTACCCCAAAAAGTA----- mirR 20 4
-----GGAAGCCCTTACCCCAAAA----- mirR 19 3
-----GAAGCCCTTACCCCAAAAAGTATC----- mirR 24 3
-----GGAAGCCCTTACCCCAAAA----- mirR 18 3
-----GAAGCCCTTACCCCAAAA----- mirR 18 2
-----GGAAGCCCTTACCCCAAAAAGTATC----- mirR 25 2
-----AGCCCTTACCCCAAAAAG----- mirR 18 2
-----GCCCTTACCCCAAAAAGTA----- mirR 19 2
-----AGCCCTTACCCCAAAAAGTATCT----- mirR 23 1
-----GAAGCCCTTACCCCAAAA----- mirR 19 1
-----GCCCTTACCCCAAAAAGTAT----- mirR 20 1
-----ATCTACGGGAGGCTTGGT----- morR 18 2
-----ATCTACGGGAGGCTTGGTC----- morR 19 1
-----CTACGGGAGGCTTGGTCTAC morR 20 1

```

>mmu-mir-146a

AGTCTGTGTATCCCAGCTCTGAGAACTGAATTCATGGGTTATATCAATGTCAGACCTGTGAAATTCAGTTCTTCAGCTGGGATAGCTCTGTATC species len reads

```

AGTCTGTGTGTATCCCCAGCTC----- morL 22 1
--TCTGTGTGTATCCCCAGCTC----- morL 20 1
---CTGTGTGTATCCCCAGCTC----- morL 19 1
-----TGAGAACTGAATTCATGGGTTA----- mirL 23 10167
-----TGAGAACTGAATTCATGGGT----- mirL 22 5565
-----TGAGAACTGAATTCATGGGTAT----- mirL 24 1735
-----TGAGAACTGAATTCATGGGT----- mirL 21 1616
-----GAGAACTGAATTCATGGGTTA----- mirL 22 538
-----GAGAACTGAATTCATGGGT----- mirL 21 299
-----CTGAGAACTGAATTCATGGGTTA----- mirL 24 298
-----CTGAGAACTGAATTCATGGGT----- mirL 22 254
-----TGAGAACTGAATTCATGGG----- mirL 20 249
-----TGAGAACTGAATTCATGG----- mirL 19 156
-----TGAGAACTGAATTCATGGGTATA----- mirL 25 120
-----AGAACTGAATTCATGGGTTA----- mirL 21 115
-----GAGAACTGAATTCATGGGTAT----- mirL 23 109
-----CTGAGAACTGAATTCATGGGT----- mirL 23 108
-----GAACTGAATTCATGGGTTA----- mirL 20 83
-----CTGAGAACTGAATTCATGGGTAT----- mirL 25 66
-----CTGAGAACTGAATTCATGGG----- mirL 21 44
-----GAGAACTGAATTCATGGGT----- mirL 20 42
-----AGAACTGAATTCATGGGT----- mirL 20 18
-----CTGAGAACTGAATTCATGGGTATA----- mirL 26 18
-----GAGAACTGAATTCATGGG----- mirL 19 12
-----GAACTGAATTCATGGGT----- mirL 19 11
-----TCTGAGAACTGAATTCATGGG----- mirL 22 11
-----GAGAACTGAATTCATGG----- mirL 18 10
-----GAGAACTGAATTCATGGGTATA----- mirL 24 8
-----CTGAGAACTGAATTCATGGGTATAT----- mirL 27 5
-----GAACTGAATTCATGGGT----- mirL 18 5
-----AGAACTGAATTCATGGGTAT----- mirL 22 4
-----TCTGAGAACTGAATTCATGGGT----- mirL 23 1
-----TCTGAGAACTGAATTCATGGGTTA----- mirL 25 1
-----CCTGTGAAATTCAGTTCTTCAG----- mirR 22 174
-----CCTGTGAAATTCAGTTCTTCA----- mirR 21 30
-----CCTGTGAAATTCAGTTCTTCAGC----- mirR 23 30
-----CCTGTGAAATTCAGTTCTTC----- mirR 20 9
-----ACCTGTGAAATTCAGTTCTTC----- mirR 21 5
-----GTGAAATTCAGTTCTTCA----- mirR 18 4
-----CCTGTGAAATTCAGTTCT----- mirR 18 2
-----ACCTGTGAAATTCAGTTC----- mirR 18 2
-----CTGTGAAATTCAGTTCTTC----- mirR 19 1
-----CCTGTGAAATTCAGTTCTTCAGCTG----- mirR 25 1
-----ACCTGTGAAATTCAGTTCTTCA----- mirR 22 1
-----TGTGAAATTCAGTTCTTCAGCTG----- mirR 23 1
-----GCTGGGATAGCTCTGTCA-- morR 18 3

```

```
-----TGGGATAGCTCTGTTCATC morR 18 1
-----CAGCTGGGATAGCTCTGT---- morR 18 1
-----CAGCTGGGATAGCTCTGTCA-- morR 20 1

>mmu-mir-193
AGACGGACGGGAGCTGAGAGCTGGGTCTTTGCGGGCAAGATGAGAGTGTCAAGTCAACTGGCCTACAAAGTCCCAGTCTCGGTCCCCAGGACCGGCATTTTCTTCACTC species len reads
--ACGGACGGGAGCTGAGAGC----- morL 19 8
---CGGACGGGAGCTGAGAGC----- morL 18 4
-GACGGACGGGAGCTGAGAGC----- morL 20 3
AGACGGACGGGAGCTGAGAGC----- morL 21 1
--ACGGACGGGAGCTGAGAGCT----- morL 20 1
-----TGGGTCTTTGCGGGCAAGATGA----- mirL 22 7566
-----TGGGTCTTTGCGGGCAAGATGAG----- mirL 23 286
-----GGGTCTTTGCGGGCAAGATGA----- mirL 21 261
-----TGGGTCTTTGCGGGCAAGATG----- mirL 21 250
-----TGGGTCTTTGCGGGCAAGAT----- mirL 20 112
-----TGGGTCTTTGCGGGCAAGATGAGA----- mirL 24 99
-----TGGGTCTTTGCGGGCAAGA----- mirL 19 48
-----GGTCTTTGCGGGCAAGATGA----- mirL 20 33
-----GGGTCTTTGCGGGCAAGATGAG----- mirL 22 25
-----GTCTTTGCGGGCAAGATGA----- mirL 19 14
-----GGGTCTTTGCGGGCAAGATG----- mirL 20 12
-----TGGGTCTTTGCGGGCAAGATGAGAG----- mirL 25 12
-----GGTCTTTGCGGGCAAGATG----- mirL 19 8
-----GGGTCTTTGCGGGCAAGAT----- mirL 19 8
-----GGGTCTTTGCGGGCAAGATGAGA----- mirL 23 8
-----GGTCTTTGCGGGCAAGATGAG----- mirL 21 3
-----GGGTCTTTGCGGGCAAGATGAGAG----- mirL 24 3
-----GGGTCTTTGCGGGCAAGA----- mirL 18 2
-----GTCTTTGCGGGCAAGATG----- mirL 18 2
-----GCTGGGTCTTTGCGGGCA----- mirL 18 1
-----AGCTGGGTCTTTGCGGGC----- mirL 18 1
-----AGCTGGGTCTTTGCGGGCAAG----- mirL 21 1
-----TGAGAGTGTCAAGTCAAC----- loop 18 2
-----AACTGGCCTACAAAGTCCCAGT----- mirR 22 5127
-----AACTGGCCTACAAAGTCCCA----- mirR 20 3205
-----AACTGGCCTACAAAGTCCCAGTC----- mirR 23 1659
-----AACTGGCCTACAAAGTCCCAG----- mirR 21 1535
-----AACTGGCCTACAAAGTCCCAGTCC----- mirR 24 510
-----AACTGGCCTACAAAGTCCC----- mirR 19 467
-----AACTGGCCTACAAAGTCC----- mirR 18 98
-----TGGCCTACAAAGTCCCAGT----- mirR 19 24
-----ACTGGCCTACAAAGTCCCAGT----- mirR 21 23
-----TGGCCTACAAAGTCCCAGTCC----- mirR 21 11
-----ACTGGCCTACAAAGTCCCAGTC----- mirR 22 6
-----TGGCCTACAAAGTCCCAG----- mirR 18 6
```

```

-----CTGGCCTACAAAGTCCCA----- mirR 18 5
-----CAACTGGCCTACAAAGTCCCAG----- mirR 22 3
-----ACTGGCCTACAAAGTCCCA----- mirR 19 2
-----CAACTGGCCTACAAAGTCCCAGTC----- mirR 24 2
-----TGGCCTACAAAGTCCCAGTCCTC----- mirR 23 2
-----CAACTGGCCTACAAAGTCCC----- mirR 20 1
-----ACTGGCCTACAAAGTCCCAGTCC----- mirR 23 1
-----CAACTGGCCTACAAAGTCCCA----- mirR 21 1
-----TTCAACTGGCCTACAAAGTCCCAGTC----- mirR 26 1
-----ACTGGCCTACAAAGTCCC----- mirR 18 1
-----CCTCGGTCCCCAGGACCGGCATTTTCTTCAC-- morR 31 6
-----CTCGGTCCCCAGGACCGG----- morR 18 4
-----CCTCGGTCCCCAGGACCGGCATTTTCTTCACTC morR 33 2
-----AGTCCTCGGTCCCCAGGA----- morR 18 1
-----GTCCTCGGTCCCCAGGAC----- morR 18 1
-----CCTCGGTCCCCAGGACCGGCATTTTCTTC----- morR 29 1
-----GTCCTCGGTCCCCAGGAC----- morR 19 1

```

>mmu-mir-188

| Species | len | reads |
|---------|-----|-------|
| morL    | 18  | 15    |
| morL    | 20  | 8     |
| morL    | 20  | 7     |
| morL    | 19  | 7     |
| morL    | 21  | 4     |
| morL    | 19  | 4     |
| morL    | 20  | 3     |
| morL    | 18  | 2     |
| morL    | 18  | 1     |
| morL    | 25  | 1     |
| mirL    | 22  | 8047  |
| mirL    | 21  | 2772  |
| mirL    | 23  | 2635  |
| mirL    | 20  | 1614  |
| mirL    | 24  | 1234  |
| mirL    | 19  | 523   |
| mirL    | 25  | 362   |
| mirL    | 19  | 44    |
| mirL    | 20  | 31    |
| mirL    | 21  | 26    |
| mirL    | 20  | 10    |
| mirL    | 18  | 9     |
| mirL    | 19  | 9     |
| mirL    | 18  | 4     |
| mirL    | 23  | 3     |
| mirL    | 21  | 3     |

```

-----ATCCCTTGCATGGTGGAG----- mirL 18 3
-----ACATCCCTTGCATGGTGG----- mirL 18 1
-----TCCCTTGCATGGTGGAGGG----- mirL 19 1
-----ATCCCTTGCATGGTGGAGGGTGAG----- mirL 25 1
-----TGAGCTCTCTGAAAACCC----- loop 18 48
-----GTGAGCTCTCTGAAAACCC----- loop 19 15
-----TGAGCTCTCTGAAAACCC----- loop 19 4
-----GCTCTCTGAAAACCCCTC----- loop 18 2
-----GAGCTCTCTGAAAACCCCTC----- loop 20 1
-----GGTGAGCTCTCTGAAAACC----- loop 19 1
-----CTCCACATGCAGGGTTTGCA----- mirR 21 1643
-----CTCCACATGCAGGGTTTGC----- mirR 20 728
-----TCCACATGCAGGGTTTG----- mirR 18 198
-----CCTCCACATGCAGGGTTTGCA----- mirR 22 196
-----CCTCCACATGCAGGGTTTGC----- mirR 21 128
-----CTCCACATGCAGGGTTTGCA----- mirR 22 59
-----CTCCACATGCAGGGTTTG----- mirR 19 45
-----CTCCACATGCAGGGTTTGCA----- mirR 23 16
-----CCTCCACATGCAGGGTTTG----- mirR 20 14
-----CCACATGCAGGGTTTGCA----- mirR 18 7
-----CTCCACATGCAGGGTT----- mirR 18 6
-----TCCACATGCAGGGTTTGCA----- mirR 20 5
-----CCTCCACATGCAGGGTTTGCA----- mirR 23 5
-----CTCCACATGCAGGGTTTGCA----- mirR 24 2
-----CCCTCCACATGCAGGG----- mirR 18 2
-----CCCACATGCAGGGTTTGCA----- mirR 19 2
-----CCCTCCACATGCAGGGT----- mirR 18 1
-----CCTCCACATGCAGGGTTTGCA----- mirR 24 1
-----TCCACATGCAGGGTTTGCA----- mirR 23 1
-----TCCACATGCAGGGTTTGC----- mirR 19 1
-----TCCACATGCAGGGTTTGCA----- mirR 21 1
-----CCCACATGCAGGGTTTGC----- mirR 18 1
-----GCAGGATGGTGAGCTTCA----- morR 18 3
-----ATGGTGAGCTTCAGCTTT----- morR 18 1
-----GGATGGTGAGCTTCAGCTTTC morR 21 1

```

>mmu-mir-300

```

CTCCCAGCGCTCCTTATCGTTTGCTACTTGAAGAGAGGTTATCCTTTTGTGTGTTGCTTTACGCGAAATGAATATGCAAGGGCAAGCTCTCTTCGAGGAGCAAATGCTGCCTGGAAGCATGGCTGGCGGC species
-----CTTATCGTTTGCTACTTGA----- morL 19 2
-----CCTTATCGTTTGCTACTTGA----- morL 20 1
-----CTCCTTATCGTTTGCTACTTGA----- morL 22 9
-----TTATCGTTTGCTACTTGA----- morL 18 6
-----CTCCTTATCGTTTGCTACT----- morL 19 4
-----GCTCCTTATCGTTTGCTACTTGA----- morL 23 3
-----TCCCAGCGCTCCTTATCGTTTGCTACTTGA----- morL 31 2
-----CCCCAGCGCTCCTTATCGTTTGCTACTTGA----- morL 30 2

```



```
---CCCAGCGCTCCTTATCGTTTGCTACT----- morL 26 1
-----GTCCTTATCGTTTGCTACT----- morL 20 9
-----CGCTCCTTATCGTTTGCTAC----- morL 20 8
-----TCCTTATCGTTTGCTACT----- morL 18 8
-----CTTATCGTTTGCTACTTG----- morL 18 6
-TCCCCAGCGCTCCTTATCGTTTGCTACTT----- morL 29 2
-----CTCCTTATCGTTTGCTAC----- morL 18 2
---CCCCAGCGCTCCTTATCGTTTGCTACT----- morL 27 2
-----CTCCTTATCGTTTGCTACTT----- morL 20 2
-----GTCCTTATCGTTTGCTAC----- morL 19 2
---CAGCGCTCCTTATCGTTTGCTACT----- morL 24 1
---GCGCTCCTTATCGTTTGCTAC----- morL 21 1
---CCAGCGCTCCTTATCGTTTGCTACTTG----- morL 27 1
-----CCTTATCGTTTGCTACTTG----- morL 19 1
-----CGCTCCTTATCGTTTGCTACT----- morL 21 1
---CCCCAGCGCTCCTTATCGTTTGCTACTT----- morL 28 1
CTCCCCAGCGCTCCTTATCGTTTGCTACTT----- morL 30 1
-----TGAAGAGAGGTTATCCTTTGTGTG----- mirL 25 4
-----TGAAGAGAGGTTATCCTTTGTGTG----- mirL 24 3
-----TGAAGAGAGGTTATCCTTTGTGT----- mirL 23 2
-----TTGAAGAGAGGTTATCCTTTGTG----- mirL 23 1
-----TTGAAGAGAGGTTATCCTTTGTGT----- mirL 24 1
-----AAGAGAGGTTATCCTTTGTGTG----- mirL 23 6
-----TGAAGAGAGGTTATCCTTTGTG----- mirL 22 5
-----TTGAAGAGAGGTTATCCTTTGT----- mirL 22 5
-----GAAGAGAGGTTATCCTTTGTGTG----- mirL 24 4
-----AGAGAGGTTATCCTTTGTGTGTT----- mirL 23 3
-----TGAAGAGAGGTTATCCTTTGT----- mirL 21 2
-----TTGAAGAGAGGTTATCCTTTG----- mirL 21 2
-----GAAGAGAGGTTATCCTTTGTGT----- mirL 22 1
-----GAAGAGAGGTTATCCTTTGTGTG----- mirL 23 1
-----TTGAAGAGAGGTTATCCTTTGTGTG----- mirL 26 1
-----AGAGAGGTTATCCTTTGTGTGTT----- mirL 22 9
-----TTGAAGAGAGGTTATCCTTTGTGTG----- mirL 25 8
-----AAGAGAGGTTATCCTTTGTGTGTT----- mirL 24 7
-----AGAGAGGTTATCCTTTGTGTGTTT----- mirL 24 6
-----GAAGAGAGGTTATCCTTTGT----- mirL 20 5
-----TTGAAGAGAGGTTATCCTTT----- mirL 20 2
-----GAAGAGAGGTTATCCTTTGTGTGTT----- mirL 25 2
-----GAAGAGAGGTTATCCTTTGTG----- mirL 21 2
-----AAGAGAGGTTATCCTTTGTGTG----- mirL 22 2
-----TGAAGAGAGGTTATCCTTTG----- mirL 20 1
-----AGAGAGGTTATCCTTTGT----- mirL 18 1
-----AAGAGAGGTTATCCTTTGTGTGTTT----- mirL 25 1
-----TGAAGAGAGGTTATCCTTTGTGTGTTTG----- mirL 29 1
-----AGAGAGGTTATCCTTTGTGTG----- mirL 21 1
```

```

-----GCTTTACGCGAAATGAAT----- loop 18 1
-----TATGCAAGGGCAAGCTCTCTTC----- mirR 22 9
-----TATGCAAGGGCAAGCTCTCTTCG----- mirR 23 2
-----TATGCAAGGGCAAGCTCTCTT----- mirR 21 1
-----TATGCAAGGGCAAGCTCTCTTCGA----- mirR 24 7
-----ATGCAAGGGCAAGCTCTCTTC----- mirR 21 6
-----TATGCAAGGGCAAGCTCTCT----- mirR 20 4
-----ATGCAAGGGCAAGCTCTCTTCGA----- mirR 23 3
-----TGCAAGGGCAAGCTCTCTTCGA----- mirR 22 3
-----ATGCAAGGGCAAGCTCTCTTCG----- mirR 22 2
-----TATGCAAGGGCAAGCTCTC----- mirR 19 1
-----ATGCAAGGGCAAGCTCTCTT----- mirR 20 1
-----TATGCAAGGGCAAGCTCT----- mirR 18 8
-----TGCAAGGGCAAGCTCTCTTCGAG----- mirR 23 6
-----ATGCAAGGGCAAGCTCTCTTCGAG----- mirR 24 3
-----TGCAAGGGCAAGCTCTCTTCGAGG----- mirR 24 3
-----TGCAAGGGCAAGCTCTCTTCG----- mirR 21 2
-----ATGCAAGGGCAAGCTCTCT----- mirR 19 2
-----ATGCAAGGGCAAGCTCTCTTCGAGG----- mirR 25 2
-----TGCAAGGGCAAGCTCTCTTCGAGGA----- mirR 25 2
-----TGCAAGGGCAAGCTCTCTT----- mirR 19 2
-----ATATGCAAGGGCAAGCTCTCTTC----- mirR 23 1
-----TGCAAGGGCAAGCTCTCTTC----- mirR 20 1
-----GCAAGGGCAAGCTCTCTTCGA----- mirR 21 1
-----GCAAGGGCAAGCTCTCTTCG----- mirR 20 8
-----GCAAGGGCAAGCTCTCTTC----- mirR 19 8
-----ATATGCAAGGGCAAGCTCTCT----- mirR 21 7
-----ATATGCAAGGGCAAGCTCTCTT----- mirR 22 5
-----ATATGCAAGGGCAAGCTCTCTTCG----- mirR 24 4
-----ATATGCAAGGGCAAGCTC----- mirR 18 3
-----ATATGCAAGGGCAAGCTCT----- mirR 19 3
-----GCAAGGGCAAGCTCTCTTCGAGG----- mirR 23 3
-----GCAAGGGCAAGCTCTCTTCGAGG----- mirR 25 3
-----GCAAGGGCAAGCTCTCTTCGAG----- mirR 22 2
-----GAATATGCAAGGGCAAGCT----- mirR 19 1
-----ATATGCAAGGGCAAGCTCTCTTCGAG----- mirR 26 1
-----GGAGCAAATGCTGCCTGG----- morR 18 2
-----GAGGAGCAAATGCTGCCTGGAAG----- morR 23 1
-----GAGGAGCAAATGCTGCCTGGAAGCATGG----- morR 28 1
-----GGAGCAAATGCTGCCTGGAAGCATGGCTGGCGGC----- morR 34 1

```

>mmu-mir-483

```

CTCGGACCGTGGGGGAGAGGGGAAGACGGGAGAAGAGAAGGGAGTGGTTTTGGGTGCCTCACTCCTCCCCTCCCCTCTTGTCTCTCTGCCTATCTTC species len reads
-----ACCGTGGGGGAGAGGGGG----- morL 18 4
-----CCGTGGGGGAGAGGGGAA----- morL 19 3
CTCGGACCGTGGGGGAGAGGGGG----- morL 23 1

```

```

-----CCGTGGGGGAGAGGGGGA----- morL 18 1
----GACCGTGGGGGAGAGGGGG----- morL 19 1
-TCGGACCGTGGGGGAGAGGG----- morL 20 1
-----GTGGGGGAGAGGGGGAAG----- morL 18 1
-----CGTGGGGGAGAGGGGGAAG----- morL 19 1
-----AAGACGGGAGAAGAGAAGGGAG----- mirL 22 3149
-----AAGACGGGAGAAGAGAAGGGAGT----- mirL 23 1089
-----AGACGGGAGAAGAGAAGGGAGTGG----- mirL 24 760
-----AAGACGGGAGAAGAGAAGGGA----- mirL 21 334
-----AAGACGGGAGAAGAGAAGGGAGTG----- mirL 24 127
-----AAGACGGGAGAAGAGAAGGGAGTGG----- mirL 25 102
-----AAGACGGGAGAAGAGAAGGGAGTGGT----- mirL 26 56
-----AAGACGGGAGAAGAGAAGGG----- mirL 20 55
-----AGACGGGAGAAGAGAAGGGAG----- mirL 21 49
-----AGACGGGAGAAGAGAAGGGAGT----- mirL 22 29
-----ACGGGAGAAGAGAAGGGAG----- mirL 19 12
-----AGACGGGAGAAGAGAAGGGAGTG----- mirL 23 10
-----AGACGGGAGAAGAGAAGGGAGTGGT----- mirL 25 8
-----GAAGACGGGAGAAGAGAAGGGA----- mirL 22 8
-----GAAGACGGGAGAAGAGAAG----- mirL 19 8
-----GAAGACGGGAGAAGAGAAGGG----- mirL 21 4
-----AGACGGGAGAAGAGAAGGGA----- mirL 20 3
-----GACGGGAGAAGAGAAGGGAG----- mirL 20 3
-----GAAGACGGGAGAAGAGAAGGGAG----- mirL 23 2
-----GGGAAGACGGGAGAAGAG----- mirL 18 2
-----AGACGGGAGAAGAGAAGG----- mirL 18 2
-----GGAAGACGGGAGAAGAGA----- mirL 18 1
-----GACGGGAGAAGAGAAGGGA----- mirL 19 1
-----GGGAAGACGGGAGAAGAGA----- mirL 19 1
-----GAAGACGGGAGAAGAGAA----- mirL 18 1
-----GGAAGACGGGAGAAGAGAA----- mirL 19 1
-----TCACTCCTCCCCTCCCGTCTTGT----- mirR 23 4296
-----CACTCCTCCCCTCCCGTCTTGT----- mirR 22 3836
-----TCACTCCTCCCCTCCCGTCTT----- mirR 21 2151
-----TCACTCCTCCCCTCCCGTCTTG----- mirR 22 1739
-----TCACTCCTCCCCTCCCGTCT----- mirR 20 305
-----CACTCCTCCCCTCCCGTCTTGT----- mirR 23 261
-----TCACTCCTCCCCTCCCGTCTTGT----- mirR 24 216
-----CACTCCTCCCCTCCCGTCTTG----- mirR 21 168
-----TCACTCCTCCCCTCCCGTCT----- mirR 19 155
-----CACTCCTCCCCTCCCGTCTT----- mirR 20 96
-----TCACTCCTCCCCTCCCGT----- mirR 18 74
-----ACTCCTCCCCTCCCGTCTTGT----- mirR 21 43
-----CACTCCTCCCCTCCCGTCTTGTTC----- mirR 24 25
-----CTCCTCCCCTCCCGTCTTGT----- mirR 20 19
-----CACTCCTCCCCTCCCGTCT----- mirR 19 18

```

```

-----ACTCCTCCCCTCCCGTCTT----- mirR 19 11
-----CTCCTCCCCTCCCGTCTTG----- mirR 19 9
-----ACTCCTCCCCTCCCGTCT----- mirR 18 4
-----CACTCCTCCCCTCCCGTC----- mirR 18 3
-----GCCTCACTCCTCCCCTCC----- mirR 18 3
-----CCTCACTCCTCCCCTCCC----- mirR 18 2
-----CTCCTCCCCTCCCGTCTT----- mirR 18 2
-----ACTCCTCCCCTCCCGTCTTG----- mirR 20 2
-----CTCCTCCCCTCCCGTCTTGTT----- mirR 22 2
-----CCTCACTCCTCCCCTCCCG----- mirR 19 1
-----CTCCTCCCCTCCCGTCTTGTT----- mirR 21 1
-----CTCCTCCCCTCCCGTCTTGTTCT----- mirR 23 1
-----CTCTCCTGCCCTATCTTC morR 18 1

```

>mmu-mir-28

| Species                                                                                                              | len | reads |
|----------------------------------------------------------------------------------------------------------------------|-----|-------|
| CATAGAGGTGGTCCCTACCTTCAAGGAGCTCACAGTCTATTGAGTTGCCTTTCTGATTCTCCCACTAGATTGTGAGCTGCTGGAGGGCAGGCACTTGAATTCATCTGAAAAGGTAG | 18  | 5     |
| ---AGAGGTGGTCCCTACCTT-----                                                                                           | 18  | 3     |
| ---GAGGTGGTCCCTACCTTC-----                                                                                           | 18  | 1     |
| ---TAGAGGTGGTCCCTACCT-----                                                                                           | 22  | 1     |
| CATAGAGGTGGTCCCTACCTTC-----                                                                                          | 21  | 4658  |
| -----AAGGAGCTCACAGTCTATTGA-----                                                                                      | 23  | 2076  |
| -----AAGGAGCTCACAGTCTATTGAG-----                                                                                     | 22  | 1685  |
| -----AAGGAGCTCACAGTCTATTG-----                                                                                       | 20  | 794   |
| -----AAGGAGCTCACAGTCTATT-----                                                                                        | 19  | 170   |
| -----AAGGAGCTCACAGTCTATTGAGTT-----                                                                                   | 24  | 166   |
| -----AAGGAGCTCACAGTCTATT-----                                                                                        | 18  | 132   |
| -----CAAGGAGCTCACAGTCTATTGA-----                                                                                     | 22  | 127   |
| -----CAAGGAGCTCACAGTCTATTG-----                                                                                      | 21  | 125   |
| -----TCAAGGAGCTCACAGTCTATTG-----                                                                                     | 22  | 56    |
| -----CAAGGAGCTCACAGTCTATTGAG-----                                                                                    | 23  | 16    |
| -----CAAGGAGCTCACAGTCTATTGAGT-----                                                                                   | 24  | 15    |
| -----GGAGCTCACAGTCTATTGA-----                                                                                        | 19  | 14    |
| -----AGGAGCTCACAGTCTATTGA-----                                                                                       | 20  | 13    |
| -----CAAGGAGCTCACAGTCTATT-----                                                                                       | 20  | 11    |
| -----CAAGGAGCTCACAGTCTATT-----                                                                                       | 19  | 10    |
| -----TCAAGGAGCTCACAGTCTATT-----                                                                                      | 20  | 9     |
| -----TCAAGGAGCTCACAGTCTATT-----                                                                                      | 21  | 6     |
| -----TCAAGGAGCTCACAGTCTATTGAG-----                                                                                   | 24  | 2     |
| -----GGAGCTCACAGTCTATTG-----                                                                                         | 18  | 2     |
| -----TCAAGGAGCTCACAGTCTATT-----                                                                                      | 19  | 2     |
| -----AGGAGCTCACAGTCTATT-----                                                                                         | 18  | 1     |
| -----CAAGGAGCTCACAGTCTATT-----                                                                                       | 18  | 1     |
| -----AGGAGCTCACAGTCTATTG-----                                                                                        | 19  | 1     |
| -----AGGAGCTCACAGTCTATTGAGT-----                                                                                     | 22  | 1     |
| -----TCAAGGAGCTCACAGTCTATT-----                                                                                      | 18  | 1     |

```

-----AGGAGCTCACAGTCTATTGAG----- mirL 21 1
-----GGAGCTCACAGTCTATTGAGTT----- mirL 22 1
-----GAGCTCACAGTCTATTGA----- mirL 18 1
-----TTGCCTTTCTGATTCTCC----- loop 18 32
-----TTGCCTTTCTGATTCTCCC----- loop 19 3
-----TTGCCTTTCTGATTCTCCA----- loop 20 2
-----AGTTGCCTTTCTGATTCTC----- loop 19 1
-----AGTTGCCTTTCTGATTCTCC----- loop 20 1
-----GAGTTGCCTTTCTGATTC----- loop 18 1
-----CACTAGATTGTGAGCTGCTGGA----- mirR 22 3755
-----CACTAGATTGTGAGCTGCTGGAG----- mirR 23 2162
-----CACTAGATTGTGAGCTGCTGG----- mirR 21 572
-----ACTAGATTGTGAGCTGCTGGAG----- mirR 22 433
-----CACTAGATTGTGAGCTGCTGGAGG----- mirR 24 291
-----ACTAGATTGTGAGCTGCTGGA----- mirR 21 233
-----CACTAGATTGTGAGCTGCTG----- mirR 20 233
-----CACTAGATTGTGAGCTGCTGGAGGG----- mirR 25 129
-----ACTAGATTGTGAGCTGCTGGAGG----- mirR 23 126
-----ACTAGATTGTGAGCTGCTGGAGGG----- mirR 24 102
-----CCACTAGATTGTGAGCTGCTGGA----- mirR 23 64
-----CTAGATTGTGAGCTGCTGGA----- mirR 20 61
-----CTAGATTGTGAGCTGCTGGAGG----- mirR 22 59
-----CTAGATTGTGAGCTGCTGGAGGG----- mirR 23 43
-----CACTAGATTGTGAGCTGCTGGAGGGG----- mirR 26 42
-----CTAGATTGTGAGCTGCTGGAG----- mirR 21 30
-----ACTAGATTGTGAGCTGCTGG----- mirR 20 28
-----ACTAGATTGTGAGCTGCTGGAGGGC----- mirR 25 26
-----CCACTAGATTGTGAGCTGCTGGAG----- mirR 24 25
-----CCACTAGATTGTGAGCTGCTGG----- mirR 22 23
-----CCACTAGATTGTGAGCTGCTGGAGG----- mirR 25 17
-----TAGATTGTGAGCTGCTGGAG----- mirR 20 15
-----CTAGATTGTGAGCTGCTGGAGGGC----- mirR 24 15
-----CCACTAGATTGTGAGCTGCTG----- mirR 21 14
-----ACTAGATTGTGAGCTGCTG----- mirR 19 11
-----CCACTAGATTGTGAGCTGCTGGAGGG----- mirR 26 4
-----CTAGATTGTGAGCTGCTGG----- mirR 19 4
-----TCCCCTAGATTGTGAGC----- mirR 18 3
-----CTAGATTGTGAGCTGCTG----- mirR 18 3
-----CCACTAGATTGTGAGCTGCT----- mirR 20 2
-----CCCCTAGATTGTGAGCTGCTGG----- mirR 23 2
-----CCCCTAGATTGTGAGCTGCTGGA----- mirR 24 2
-----TAGATTGTGAGCTGCTGG----- mirR 18 1
-----TAGATTGTGAGCTGCTGGAGG----- mirR 21 1
-----GAGGGCAGGCACTTGAAT----- morR 18 2
-----GGGCAGGCACTTGAATTCATCTGAAAAGGTAG----- morR 32 1
-----CAGGCACTTGAATTCATCT----- morR 19 1

```

```

-----GGCAGGCACTTGAATTCA----- morR 18 1
-----GGGCAGGCACTTGAATTCATCT----- morR 22 1
-----AGGGCAGGCACTTGAATT----- morR 18 1
-----GCAGGCACTTGAATTCAT----- morR 18 1
-----GAGGGCAGGCACTTGAATT----- morR 19 1

```

>mmu-mir-501

| Sequence                                                                                                   | species | len | reads |
|------------------------------------------------------------------------------------------------------------|---------|-----|-------|
| GGCCTTCTGCTCTGCTCATCCTCTCTAATCCTTTGTCCTGGGTGAAAAATGCTATTTGTATGCAATGCACCCGGGCAAGGATTGGGGAAGGTGAGCCTGATCTGCA | morL    | 23  | 12    |
| ---CTTCTGCTCTGCTCATCCTCTCT                                                                                 | morL    | 20  | 12    |
| ---CTGCTCTGCTCATCCTCTCT                                                                                    | morL    | 22  | 9     |
| ---TTCTGCTCTGCTCATCCTCTCT                                                                                  | morL    | 19  | 5     |
| ---TGCTCTGCTCATCCTCTCT                                                                                     | morL    | 21  | 1     |
| ---TCTGCTCTGCTCATCCTCTCT                                                                                   | morL    | 18  | 1     |
| ---TCTGCTCTGCTCATCCTC                                                                                      | morL    | 19  | 1     |
| ---CTGCTCTGCTCATCCTCTC                                                                                     | morL    | 26  | 1     |
| GGCCTTCTGCTCTGCTCATCCTCTCT                                                                                 | mirL    | 22  | 2662  |
| -----AATCCTTTGTCCTGGGTGAAA-----                                                                            | mirL    | 26  | 1862  |
| -----AATCCTTTGTCCTGGGTGAAAATGC-----                                                                        | mirL    | 21  | 815   |
| -----AATCCTTTGTCCTGGGTGAA-----                                                                             | mirL    | 20  | 783   |
| -----AATCCTTTGTCCTGGGTGAAAAT-----                                                                          | mirL    | 24  | 568   |
| -----AATCCTTTGTCCTGGGTGAAAATG-----                                                                         | mirL    | 25  | 375   |
| -----AATCCTTTGTCCTGGGTGAAAATGCT-----                                                                       | mirL    | 21  | 77    |
| -----ATCCTTTGTCCTGGGTGAAA-----                                                                             | mirL    | 20  | 59    |
| -----TCCTTTGTCCTGGGTGAAA-----                                                                              | mirL    | 19  | 42    |
| -----CCTTTGTCCTGGGTGAAA-----                                                                               | mirL    | 18  | 25    |
| -----CCTTTGTCCTGGGTGAA-----                                                                                | mirL    | 19  | 25    |
| -----TCCTTTGTCCTGGGTGAA-----                                                                               | mirL    | 20  | 10    |
| -----ATCCTTTGTCCTGGGTGAA-----                                                                              | mirL    | 18  | 7     |
| -----ATCCTTTGTCCTGGGTG-----                                                                                | mirL    | 19  | 3     |
| -----CCTTTGTCCTGGGTGAAAATGCTA-----                                                                         | mirL    | 25  | 3     |
| -----ATCCTTTGTCCTGGGTGAAAATG-----                                                                          | mirL    | 24  | 2     |
| -----ATCCTTTGTCCTGGGTGAAAATGC-----                                                                         | mirL    | 25  | 2     |
| -----TCTAATCCTTTGTCCTGGGTGAA-----                                                                          | mirL    | 23  | 1     |
| -----CCTTTGTCCTGGGTGAAAATGC-----                                                                           | mirL    | 23  | 1     |
| -----TCCTTTGTCCTGGGTGA-----                                                                                | mirL    | 18  | 1     |
| -----AATGCACCCGGGCAAGGATTGG-----                                                                           | mirR    | 23  | 6491  |
| -----AATGCACCCGGGCAAGGATTGG-----                                                                           | mirR    | 22  | 2342  |
| -----AATGCACCCGGGCAAGGATT-----                                                                             | mirR    | 21  | 985   |
| -----AATGCACCCGGGCAAGGATTGGG-----                                                                          | mirR    | 24  | 539   |
| -----AATGCACCCGGGCAAGGATT-----                                                                             | mirR    | 20  | 110   |
| -----AATGCACCCGGGCAAGGATTGGGG-----                                                                         | mirR    | 25  | 73    |
| -----TGCACCCGGGCAAGGATTGGG-----                                                                            | mirR    | 22  | 57    |
| -----ATGCACCCGGGCAAGGATTGG-----                                                                            | mirR    | 21  | 31    |
| -----ATGCACCCGGGCAAGGATTGG-----                                                                            | mirR    | 22  | 31    |

```

-----AATGCACCCGGGCAAGGA----- mirR 18 30
-----TGCACCCGGGCAAGGATTTGG----- mirR 21 24
-----GCACCCGGGCAAGGATTTG----- mirR 19 17
-----TGCACCCGGGCAAGGATTTGGGG----- mirR 23 12
-----GCACCCGGGCAAGGATTT----- mirR 18 4
-----TGCACCCGGGCAAGGATTTG----- mirR 20 4
-----CAATGCACCCGGGCAAGGATTTGG----- mirR 24 3
-----GCACCCGGGCAAGGATTTGG----- mirR 20 2
-----ATGCACCCGGGCAAGGATTTGGGG----- mirR 24 2
-----ATGCACCCGGGCAAGGATTT----- mirR 20 2
-----TGCACCCGGGCAAGGATTT----- mirR 19 2
-----TGCACCCGGGCAAGGATT----- mirR 18 2
-----GCAATGCACCCGGGCAAGG----- mirR 19 2
-----ATGCACCCGGGCAAGGATTTGGG----- mirR 23 1
-----ATGCACCCGGGCAAGGAT----- mirR 18 1
-----GCACCCGGGCAAGGATTTGGGGA----- mirR 23 1
-----GGAAGGTGAGCCTGATCTGC----- morR 20 15
-----GGAAGGTGAGCCTGATCTG----- morR 19 8
-----GGAAGGTGAGCCTGATCTGCA morR 21 1
-----GAAGGTGAGCCTGATCTG----- morR 18 1
-----GGGGAAGGTGAGCCTGAT----- morR 18 1
-----TGGGGAAGGTGAGCCTGA----- morR 18 1
-----AAGGTGAGCCTGATCTGC----- morR 18 1

```

>mmu-mir-582

```

CCCTCGTAATCTGTACTCTTTGGATACAGTTGTTCAACCAGTTACTAATCTAATAATTGTAACCTGTTGAACAACCTGAACCCAAAGGGTGCAAAGTTGGAAGC species len reads
-----ATCTGTACTCTTTGGATAC----- morL 19 1
CCCTCGTAATCTGTACTCTTTGG----- morL 23 1
-----TACAGTTGTTCAACCAGTTACT----- mirL 22 2957
-----ATACAGTTGTTCAACCAGTTAC----- mirL 22 1798
-----ATACAGTTGTTCAACCAGTTACT----- mirL 23 1180
-----ATACAGTTGTTCAACCAGTTA----- mirL 21 971
-----ACAGTTGTTCAACCAGTTACT----- mirL 21 712
-----TACAGTTGTTCAACCAGTTAC----- mirL 21 295
-----TACAGTTGTTCAACCAGTTA----- mirL 20 167
-----ATACAGTTGTTCAACCAGTT----- mirL 20 152
-----TACAGTTGTTCAACCAGTT----- mirL 19 83
-----ACAGTTGTTCAACCAGTTAC----- mirL 20 75
-----ACAGTTGTTCAACCAGTTACTA----- mirL 22 63
-----CAGTTGTTCAACCAGTTACT----- mirL 20 45
-----GATACAGTTGTTCAACCAGTT----- mirL 21 44
-----GATACAGTTGTTCAACCAGTTA----- mirL 22 44
-----ACAGTTGTTCAACCAGTTA----- mirL 19 38
-----AGTTGTTCAACCAGTTACT----- mirL 19 34
-----TACAGTTGTTCAACCAGTTACTA----- mirL 23 33
-----ATACAGTTGTTCAACCAGTTACTA----- mirL 24 32

```

```

-----ATACAGTTGTTCAACCAGT----- mirL 19 26
-----ACAGTTGTTCAACCAGTT----- mirL 18 15
-----GATACAGTTGTTCAACCA----- mirL 18 14
-----TACAGTTGTTCAACCAGT----- mirL 18 13
-----TACAGTTGTTCAACCAGTTACTAA----- mirL 24 11
-----ACAGTTGTTCAACCAGTTACTAA----- mirL 23 10
-----ATACAGTTGTTCAACCAG----- mirL 18 9
-----CAGTTGTTCAACCAGTTAC----- mirL 19 7
-----CAGTTGTTCAACCAGTTA----- mirL 18 5
-----GATACAGTTGTTCAACCAG----- mirL 19 3
-----GGATACAGTTGTTCAACCAGTT----- mirL 22 2
-----ACAGTTGTTCAACCAGTTACTAATC----- mirL 25 2
-----AGTTGTTCAACCAGTTAC----- mirL 18 2
-----GATACAGTTGTTCAACCAGTTAC----- mirL 23 2
-----AACCTGTTGAACAACCTGAACCC----- mirR 22 2990
-----CCTGTTGAACAACCTGAACCCAA----- mirR 22 2609
-----AACCTGTTGAACAACCTGAACC----- mirR 21 918
-----TAACCTGTTGAACAACCTGAACC----- mirR 22 789
-----TAACCTGTTGAACAACCTGAACCC----- mirR 23 635
-----AACCTGTTGAACAACCTGAACCCA----- mirR 23 398
-----CCTGTTGAACAACCTGAACCCA----- mirR 21 315
-----TAACCTGTTGAACAACCTGAAC----- mirR 21 198
-----AACCTGTTGAACAACCTGAAC----- mirR 20 152
-----AACCTGTTGAACAACCTGAACCCAA----- mirR 24 104
-----ACCTGTTGAACAACCTGAACCCA----- mirR 22 86
-----ACCTGTTGAACAACCTGAACCC----- mirR 21 63
-----AACCTGTTGAACAACCTGAA----- mirR 19 40
-----TAACCTGTTGAACAACCTGAACCCA----- mirR 24 39
-----ACCTGTTGAACAACCTGAACC----- mirR 20 37
-----CCTGTTGAACAACCTGAACCCAAA----- mirR 23 35
-----AACCTGTTGAACAACCTGAACCCAAA----- mirR 25 33
-----TGTAACCTGTTGAACAAC----- mirR 18 28
-----TAACCTGTTGAACAACCTGAA----- mirR 20 25
-----GTAACCTGTTGAACAACCTGAAC----- mirR 22 18
-----CCTGTTGAACAACCTGAACC----- mirR 19 18
-----CCTGTTGAACAACCTGAACCC----- mirR 20 11
-----ACCTGTTGAACAACCTGAACCCAA----- mirR 23 9
-----CTGTTGAACAACCTGAACCCAA----- mirR 21 9
-----CCTGTTGAACAACCTGAAC----- mirR 18 8
-----TAACCTGTTGAACAACCTGAACCCAA----- mirR 25 5
-----TAACCTGTTGAACAACCTGA----- mirR 19 5
-----ACCTGTTGAACAACCTGAAC----- mirR 19 3
-----GTAACCTGTTGAACAACCTGAACC----- mirR 23 2
-----TGTAACCTGTTGAACAACCTG----- mirR 20 1
-----CTGTTGAACAACCTGAACC----- mirR 18 1
-----ACCTGTTGAACAACCTGAACCCAAA----- mirR 24 1

```



```

-----CCCAAAGGGTGCAAAGTT----- morR 18 2
-----GGGTGCAAAGTTGGAAGC morR 18 1
-----CCCAAAGGGTGCAAAGTTGG----- morR 19 1

>mmu-mir-412
CATCTCGCTCTGGGGTATGGGACGGATGGTTCGACCAGCTGGAAAGTAATGTTTCTAATGTACTTCACCTGGTCCACTAGCCGTCGGTGCCCGCTGCAGCCTGCGCCCAGGA species len reads
-----CGCTCTGGGGTATGGGACGGA----- morL 21 75
-----GCTCTGGGGTATGGGACGGA----- morL 20 52
---CTCGCTCTGGGGTATGGGACGGA----- morL 23 10
-----CGCTCTGGGGTATGGGACGGAT----- morL 22 3
-----CTCTGGGGTATGGGACGGA----- morL 19 3
-----TCGCTCTGGGGTATGGGACGGA----- morL 22 3
-----GCTCTGGGGTATGGGACGG----- morL 19 2
-----GCTCTGGGGTATGGGACGGAT----- morL 21 2
-----CGCTCTGGGGTATGGGACGG----- morL 20 2
---TCTCGCTCTGGGGTATGGGACG----- morL 22 1
-----CTCTGGGGTATGGGACGGAT----- morL 20 1
CATCTCGCTCTGGGGTATGGGACG----- morL 24 1
-----TGGTCGACCAGCTGGAAAGTAAT----- mirL 23 505
-----TGGTCGACCAGCTGGAAAGTAA----- mirL 22 143
-----TGGTCGACCAGCTGGAAAGTAATT----- mirL 24 55
-----TGGTCGACCAGCTGGAAAGTA----- mirL 21 46
-----TGGTCGACCAGCTGGAAAGT----- mirL 20 19
-----TGGTCGACCAGCTGGAAAG----- mirL 19 8
-----GGTCGACCAGCTGGAAAGTAA----- mirL 21 7
-----TGGTCGACCAGCTGGAAA----- mirL 18 7
-----GGTCGACCAGCTGGAAAGTAAT----- mirL 22 7
-----GGTCGACCAGCTGGAAAGTAATT----- mirL 23 4
-----GATGGTCGACCAGCTGGAAAGT----- mirL 22 2
-----ATGGTCGACCAGCTGGAAAGTAAT----- mirL 24 1
-----ATGGTCGACCAGCTGGAAAGT----- mirL 21 1
-----ATGGTCGACCAGCTGGAAAG----- mirL 20 1
-----GATGGTCGACCAGCTGGAAAGTA----- mirL 23 1
-----ATGGTCGACCAGCTGGAAAGTA----- mirL 22 1
-----GGTCGACCAGCTGGAAAGTA----- mirL 20 1
-----GTCGACCAGCTGGAAAGT----- mirL 18 1
-----ATGGTCGACCAGCTGGAA----- mirL 18 1
-----ACTTCACCTGGTCCACTAGCCGT----- mirR 23 9365
-----ACTTCACCTGGTCCACTAGCCG----- mirR 22 2627
-----CTTCACCTGGTCCACTAGCCGT----- mirR 22 1326
-----TTCACCTGGTCCACTAGCCG----- mirR 20 780
-----CTTCACCTGGTCCACTAGCCG----- mirR 21 488
-----TTCACCTGGTCCACTAGCCGT----- mirR 21 337
-----CTTCACCTGGTCCACTAGCCGTC----- mirR 23 221
-----ACTTCACCTGGTCCACTAGC----- mirR 20 190
-----GTACTTCACCTGGTCCACTAGC----- mirR 22 139

```

```

-----ACTTCACCTGGTCCACTAGCC----- mirR 21 136
-----TCACCTGGTCCACTAGCCGT----- mirR 20 133
-----CTTCACCTGGTCCACTAGCC----- mirR 20 79
-----CTTCACCTGGTCCACTAGCCGTCG----- mirR 24 63
-----TTCACCTGGTCCACTAGCCGTC----- mirR 22 61
-----TCACCTGGTCCACTAGCCG----- mirR 19 51
-----TTCACCTGGTCCACTAGCC----- mirR 19 44
-----CTTCACCTGGTCCACTAGC----- mirR 19 43
-----TACTTCACCTGGTCCACTAGCCGT----- mirR 24 32
-----TTCACCTGGTCCACTAGC----- mirR 18 29
-----GTACTTCACCTGGTCCACTAGCC----- mirR 23 29
-----TACTTCACCTGGTCCACTAGCC----- mirR 22 28
-----TTCACCTGGTCCACTAGCCGTCG----- mirR 23 27
-----TACTTCACCTGGTCCACTAG----- mirR 20 21
-----ACTTCACCTGGTCCACTAG----- mirR 19 20
-----TACTTCACCTGGTCCACTAGC----- mirR 21 17
-----ACTTCACCTGGTCCACTAGCCGTC----- mirR 24 17
-----TACTTCACCTGGTCCACTAGCCG----- mirR 23 16
-----GTACTTCACCTGGTCCACTAG----- mirR 21 12
-----ACTTCACCTGGTCCACTA----- mirR 18 12
-----GTACTTCACCTGGTCCACTA----- mirR 20 10
-----TGTACTTCACCTGGTCCACTAG----- mirR 22 7
-----GTACTTCACCTGGTCCACTAGCCG----- mirR 24 6
-----TACTTCACCTGGTCCACTA----- mirR 19 6
-----CTTCACCTGGTCCACTAGCCGTCG----- mirR 25 5
-----TACTTCACCTGGTCCACTAGCCGTC----- mirR 25 4
-----TCACCTGGTCCACTAGCCGTC----- mirR 21 2
-----GTACTTCACCTGGTCCACTAGCCGT----- mirR 25 2
-----TGTACTTCACCTGGTCCACTA----- mirR 21 1
-----TGTACTTCACCTGGTCCACTAGC----- mirR 23 1
-----TGTACTTCACCTGGTCCA----- mirR 18 1
-----CGTCGGTGCCCGCTGCAGCCTGCGCCAGGA morR 31 12
-----TGCCCGCTGCAGCCTGCGCCA--- morR 22 7
-----TGCCCGCTGCAGCCTGCG----- morR 18 4
-----GGTGCCCGCTGCAGCCTG----- morR 18 1
-----GGTGCCCGCTGCAGCCTGC----- morR 19 1
-----CGTCGGTGCCCGCTGCAGCCTGC----- morR 23 1

```

>mmu-mir-1191

```

TAGCAACATCTAAGCCAGCCAGGGCTACATAGTGAGAACCTGCCTCAAAAGCAAAACAGCAGTCTTACTATGTAGCCCTAGATGGCCTAGAACTCCCTAT species len reads
---CAACATCTAAGCCAGCCA----- morL 18 10
--GCAACATCTAAGCCAGCCA----- morL 19 4
--GCAACATCTAAGCCAGCC----- morL 18 2
--GCAACATCTAAGCCAGCCAG----- morL 20 1
--AGCAACATCTAAGCCAGCCA----- morL 20 1
TAGCAACATCTAAGCCAG----- morL 18 1

```

```

-----GGGCTACATAGTGAGAACCTGC----- mirL 22 57
-----GGGCTACATAGTGAGAACCTGCC----- mirL 23 14
-----GGGCTACATAGTGAGAACCTGCCT----- mirL 24 10
-----GGGCTACATAGTGAGAACCTG----- mirL 21 6
-----CTACATAGTGAGAACCTG----- mirL 18 4
-----CAGGGCTACATAGTGAGA----- mirL 18 3
-----GCTACATAGTGAGAACCTGCCT----- mirL 22 2
-----GGGCTACATAGTGAGAAC----- mirL 18 2
-----GGGCTACATAGTGAGAACCTGCCTCA----- mirL 26 2
-----AGGGCTACATAGTGAGAA----- mirL 18 2
-----CAGGGCTACATAGTGAGAACCT----- mirL 22 1
-----GGGCTACATAGTGAGAACCT----- mirL 20 1
-----CCAGGGCTACATAGTGAGAA----- mirL 20 1
-----CAGTCTTACTATGTAGCCCTA----- mirR 21 10220
-----CAGTCTTACTATGTAGCCCTAG----- mirR 22 4107
-----AGTCTTACTATGTAGCCCTAG----- mirR 21 830
-----CAGTCTTACTATGTAGCCCT----- mirR 20 583
-----CAGTCTTACTATGTAGCCCTAGA----- mirR 23 417
-----AGTCTTACTATGTAGCCCTAGA----- mirR 22 215
-----AGTCTTACTATGTAGCCCTA----- mirR 20 213
-----AGTCTTACTATGTAGCCCTAGAT----- mirR 23 80
-----CAGTCTTACTATGTAGCCCT----- mirR 19 79
-----CAGTCTTACTATGTAGCCCTAGAT----- mirR 24 59
-----CAGTCTTACTATGTAGCC----- mirR 18 47
-----GCAGTCTTACTATGTAGCCCTA----- mirR 22 24
-----GTCTTACTATGTAGCCCTA----- mirR 19 17
-----TCTTACTATGTAGCCCTA----- mirR 18 17
-----GCAGTCTTACTATGTAGCCCTAG----- mirR 23 10
-----AGTCTTACTATGTAGCCCT----- mirR 19 5
-----GTCTTACTATGTAGCCCT----- mirR 18 4
-----GTCTTACTATGTAGCCCTAG----- mirR 20 3
-----AGTCTTACTATGTAGCCCT----- mirR 18 1
-----AGCAGTCTTACTATGTAGCCCTA----- mirR 23 1
-----AGCAGTCTTACTATGTAGC----- mirR 19 1
-----ATGGCCTAGAACTCCCTA----- morR 18 1
-----AGATGGCCTAGAACTCCC----- morR 18 1
-----GATGGCCTAGAACTCCCTAT----- morR 20 1
-----TAGATGGCCTAGAACTCC----- morR 18 1

```

>mmu-mir-122

```

AGACTTTCCTTAGCAGAGCTGTGGAGTGTGACAATGGTGTGTTGTGTCCAAACCATCAAACGCCATTATCACACTAAATAGCTACTGCTAGGCAA species len reads
-----TCCTTAGCAGAGCTGTGG----- morL 18 17
---CTTTCCTTAGCAGAGCTG----- morL 18 3
AGACTTTCCTTAGCAGAGC----- morL 19 2
-----TGGAGTGTGACAATGGTGTG----- mirL 22 12768
-----TGGAGTGTGACAATGGTGTG----- mirL 21 2312

```

```

-----TGGAGTGTGACAATGGTGT----- mirL 20 263
-----GGAGTGTGACAATGGTGTTTG----- mirL 21 224
-----TGGAGTGTGACAATGGTGTTTGT----- mirL 23 183
-----GAGTGTGACAATGGTGTTTG----- mirL 20 99
-----TGGAGTGTGACAATGGTGT----- mirL 19 70
-----GGAGTGTGACAATGGTGTTT----- mirL 20 59
-----TGGAGTGTGACAATGGTG----- mirL 18 22
-----AGTGTGACAATGGTGTTTG----- mirL 19 16
-----GTGGAGTGTGACAATGGTGTTTG----- mirL 23 16
-----GAGTGTGACAATGGTGTTT----- mirL 19 9
-----GGAGTGTGACAATGGTGT----- mirL 19 9
-----TGGAGTGTGACAATGGTGTTTGT----- mirL 25 8
-----GGAGTGTGACAATGGTGT----- mirL 18 3
-----AGTGTGACAATGGTGTTT----- mirL 18 2
-----GTGGAGTGTGACAATGGT----- mirL 18 1
-----GAGTGTGACAATGGTGT----- mirL 18 1
-----CTGTGGAGTGTGACAATGGTGT----- mirL 22 1
-----AACGCCATTATCACAATA----- mirR 22 591
-----AACGCCATTATCACAATA----- mirR 20 88
-----AACGCCATTATCACAATA----- mirR 19 38
-----AACGCCATTATCACAATA----- mirR 21 26
-----AACGCCATTATCACAATA----- mirR 18 12
-----CGCCATTATCACAATA----- mirR 20 6
-----AACGCCATTATCACAATA----- mirR 20 6
-----ACGCCATTATCACAATA----- mirR 19 4
-----AACGCCATTATCACAATA----- mirR 23 4
-----CGCCATTATCACAATA----- mirR 18 3
-----AACGCCATTATCACAATA----- mirR 19 2
-----ACGCCATTATCACAATA----- mirR 21 2
-----ACGCCATTATCACAATA----- mirR 20 2
-----ACGCCATTATCACAATA----- mirR 18 1
-----TCAAACGCCATTATCACAATA----- mirR 22 1
-----AACGCCATTATCACAATA----- mirR 21 1
-----AACGCCATTATCACAATA----- mirR 18 1
-----AACGCCATTATCACAATA----- mirR 22 1
-----ATAGCTACTGCTAGGCAA morR 18 1

```

>mmu-mir-551b

```

AGATGTGCTCTTGTGGCCCATGAAATCAAGCTTGGGTGAGACCTGGTGCAGAACAGGAAGGCGACCATACTTGGTTTCAGTGGCTGCAAGAATGACTGC species len reads
--ATGTGCTCTTGTGGCCCA----- morL 18 3
AGATGTGCTCTTGTGGCC----- morL 19 1
-----GAAATCAAGCTTGGGTGAGACC----- mirL 22 103
-----GAAATCAAGCTTGGGTGAGACC----- mirL 21 52
-----GAAATCAAGCTTGGGTGAGACC----- mirL 20 29
-----GAAATCAAGCTTGGGTGAGACC----- mirL 18 20
-----GAAATCAAGCTTGGGTGAGACC----- mirL 19 10

```

```

-----CTGGTGCAGAACAGGAAG----- loop 18 1
-----CTGGTGCAGAACAGGAAGGC----- loop 20 1
-----CGACCATACTTGGTTTCAGTG----- mirR 22 7167
-----GGCGACCATACTTGGTTTCAG----- mirR 22 2856
-----GCGACCATACTTGGTTTCAG----- mirR 21 1810
-----GGCGACCATACTTGGTTTCAGT----- mirR 23 1706
-----CGACCATACTTGGTTTCAGT----- mirR 21 720
-----GGCGACCATACTTGGTTTCA----- mirR 21 393
-----GCGACCATACTTGGTTTCA----- mirR 20 351
-----CGACCATACTTGGTTTCAG----- mirR 20 318
-----GCGACCATACTTGGTTTCAGT----- mirR 22 271
-----GACCATACTTGGTTTCAGTG----- mirR 21 121
-----CGACCATACTTGGTTTCA----- mirR 19 106
-----CCCATACTTGGTTTCAGTG----- mirR 19 90
-----ACCCATACTTGGTTTCAGTG----- mirR 20 59
-----GACCATACTTGGTTTCAGT----- mirR 20 50
-----GCGACCATACTTGGTTTCAGTG----- mirR 23 32
-----GGCGACCATACTTGGTTTC----- mirR 20 23
-----GACCATACTTGGTTTCAG----- mirR 19 22
-----GCGACCATACTTGGTTTC----- mirR 19 21
-----ACCCATACTTGGTTTCAGT----- mirR 19 21
-----ACCCATACTTGGTTTCAG----- mirR 18 14
-----GCGACCATACTTGGTTT----- mirR 18 12
-----CGACCATACTTGGTTTC----- mirR 18 12
-----CGACCATACTTGGTTTCAGTGG----- mirR 23 11
-----AGGCGACCATACTTGGTTTCAG----- mirR 23 8
-----GGCGACCATACTTGGTTTCAGTG----- mirR 24 6
-----GGCGACCATACTTGGTT----- mirR 18 6
-----CCCATACTTGGTTTCAGT----- mirR 18 5
-----AGGCGACCATACTTGGTTTCA----- mirR 22 4
-----GACCATACTTGGTTTCA----- mirR 18 4
-----GGCGACCATACTTGGTTT----- mirR 19 2
-----GCGACCATACTTGGTTTCAGTGGCT----- mirR 26 1
-----CGACCATACTTGGTTTCAGTGGCT----- mirR 25 1
-----GTGGCTGCAAGAATGACTG----- morR 19 1
-----GGCTGCAAGAATGACTGC----- morR 18 1

```

>mmu-mir-155

```

GCTGAAGGCTGTATGCTGTTAATGCTAATTGTGATAGGGGTTTTGGCCTCTGACTGACTCCTACCTGTTAGCATTACAGGACACAAGGCCTGTTACTA species len reads
-CTGAAGGCTGTATGCTGT----- morL 18 2
GCTGAAGGCTGTATGCTG----- morL 18 1
-----TTAATGCTAATTGTGATAGGGGTT----- mirL 24 5851
-----TTAATGCTAATTGTGATAGGGGT----- mirL 23 3231
-----TTAATGCTAATTGTGATAGGGGTTT----- mirL 25 2497
-----TTAATGCTAATTGTGATAGGGGTTTT----- mirL 26 1367
-----TTAATGCTAATTGTGATAGGGG----- mirL 22 798

```

```

-----TTAATGCTAATTGTGATAGGGGTTTTG----- mirL 27 587
-----TAATGCTAATTGTGATAGGGGTT----- mirL 23 577
-----TAATGCTAATTGTGATAGGGGTT----- mirL 24 337
-----TAATGCTAATTGTGATAGGGGT----- mirL 22 305
-----TAATGCTAATTGTGATAGGGGTTTT----- mirL 25 243
-----TTAATGCTAATTGTGATAGGGGTTTTGG----- mirL 28 175
-----TAATGCTAATTGTGATAGGGGTTTTG----- mirL 26 80
-----TAATGCTAATTGTGATAGGGG----- mirL 21 62
-----AATGCTAATTGTGATAGGGGT----- mirL 21 49
-----ATGCTAATTGTGATAGGGGT----- mirL 20 39
-----TAATGCTAATTGTGATAGGGGTTTTGG----- mirL 27 25
-----ATGCTAATTGTGATAGGGG----- mirL 19 14
-----AATGCTAATTGTGATAGGGGTT----- mirL 22 9
-----AATGCTAATTGTGATAGGGGTTT----- mirL 23 7
-----AATGCTAATTGTGATAGGGG----- mirL 20 6
-----AATGCTAATTGTGATAGGGGTTTT----- mirL 24 6
-----ATGCTAATTGTGATAGGGGTT----- mirL 21 4
-----AATGCTAATTGTGATAGGG----- mirL 19 3
-----CTGTTAATGCTAATTGTG----- mirL 18 2
-----ATGCTAATTGTGATAGGGGTTTTGG----- mirL 25 2
-----GTTAATGCTAATTGTGATAGGG----- mirL 23 2
-----AATGCTAATTGTGATAGG----- mirL 18 1
-----TGTTAATGCTAATTGTGATAGGGTT----- mirL 26 1
-----TTGGCCTCTGACTGACTC----- loop 18 1
-----CTCCTACCTGTTAGCATTAAACA----- mirR 22 86
-----CTCCTACCTGTTAGCATTAAAC----- mirR 21 18
-----CTCCTACCTGTTAGCATT----- mirR 19 3
-----CTCCTACCTGTTAGCATT----- mirR 18 2
-----TCCTACCTGTTAGCATTAAACAG----- mirR 22 1
-----GACTCCTACCTGTTAGCATT----- mirR 20 1
-----CTCCTACCTGTTAGCATTAAACAG----- mirR 23 1
-----AGGACACAAGGCCTGTTA--- morR 18 2
-----GACACAAGGCCTGTTACTA morR 19 1
-----ACACAAGGCCTGTTACTA morR 18 1

>mmu-mir-455
GTGCTGCCCTCCCTGGTGTGAGCGTATGTGCCTTTGGACTACATCGTGAACGCAGCACCATGCAGTCCACGGGCATATACACTTGCCTCAAGGTCTATGTCATCGAGG species len reads
-----TCCCTGGTGTGAGCGTAT----- morL 18 169
GTGCTGCCCTCCCTGGTGTGAGC----- morL 23 2
-----CTCCCTGGTGTGAGCGTAT----- morL 19 1
---CTGCCCTCCCTGGTGTGAG----- morL 19 1
---GCCCTCCCTGGTGTGAGC----- morL 18 1
-----CTCCCTGGTGTGAGCGTA----- morL 18 1
-----TATGTGCCTTTGGACTACATCG----- mirL 22 1031
-----TATGTGCCTTTGGACTACATCGT----- mirL 23 156
-----TATGTGCCTTTGGACTACATC----- mirL 21 99

```

```

-----TGTGCCTTTGGACTACATCG----- mirL 20 98
-----ATGTGCCTTTGGACTACATCG----- mirL 21 91
-----TATGTGCCTTTGGACTACAT----- mirL 20 75
-----GTGCCTTTGGACTACATCG----- mirL 19 73
-----TATGTGCCTTTGGACTACA----- mirL 19 53
-----GTATGTGCCTTTGGACTACAT----- mirL 21 21
-----TATGTGCCTTTGGACTAC----- mirL 18 18
-----TGTGCCTTTGGACTACATCGTGA----- mirL 23 14
-----GTGCCTTTGGACTACATC----- mirL 18 13
-----ATGTGCCTTTGGACTACA----- mirL 18 11
-----ATGTGCCTTTGGACTACATCGT----- mirL 22 10
-----ATGTGCCTTTGGACTACATC----- mirL 20 9
-----GTATGTGCCTTTGGACTACATC----- mirL 22 8
-----TGTGCCTTTGGACTACATCGTG----- mirL 22 8
-----GTATGTGCCTTTGGACTACATCG----- mirL 23 8
-----TGTGCCTTTGGACTACATC----- mirL 19 7
-----TGTGCCTTTGGACTACATCGT----- mirL 21 7
-----TATGTGCCTTTGGACTACATCGTG----- mirL 24 7
-----ATGTGCCTTTGGACTACAT----- mirL 19 6
-----GTATGTGCCTTTGGACTACA----- mirL 20 5
-----GTATGTGCCTTTGGACTAC----- mirL 19 4
-----CGTATGTGCCTTTGGACTACAT----- mirL 22 4
-----GTATGTGCCTTTGGACTACATCGT----- mirL 24 2
-----ATGTGCCTTTGGACTACATCGTGA----- mirL 24 1
-----GTGCCTTTGGACTACATCGTG----- mirL 21 1
-----ATGTGCCTTTGGACTACATCGTG----- mirL 23 1
-----TGTGCCTTTGGACTACATCGTGAA----- mirL 24 1
-----CGTATGTGCCTTTGGACTACATC----- mirL 23 1
-----CGTATGTGCCTTTGGACTACA----- mirL 21 1
-----GCAGTCCACGGGCATATACACT----- mirR 22 3433
-----GCAGTCCACGGGCATATACAC----- mirR 21 1959
-----GCAGTCCACGGGCATATACACTT----- mirR 23 1571
-----ATGCAGTCCACGGGCATATACACT----- mirR 24 1349
-----GCAGTCCACGGGCATATACA----- mirR 20 1319
-----CAGTCCACGGGCATATACACTT----- mirR 22 978
-----ATGCAGTCCACGGGCATATACA----- mirR 22 320
-----ATGCAGTCCACGGGCATATACAC----- mirR 23 309
-----CAGTCCACGGGCATATACACT----- mirR 21 246
-----TGCAGTCCACGGGCATATACAC----- mirR 22 241
-----GCAGTCCACGGGCATATACACTTG----- mirR 24 239
-----GCAGTCCACGGGCATATAC----- mirR 19 189
-----CAGTCCACGGGCATATACACTTG----- mirR 23 163
-----GTCCACGGGCATATACACT----- mirR 19 156
-----TGCAGTCCACGGGCATATACACT----- mirR 23 154
-----AGTCCACGGGCATATACACT----- mirR 20 150
-----TGCAGTCCACGGGCATATACA----- mirR 21 125

```

```
-----CATGCAGTCCACGGGCATATACA----- mirR 23 124
-----GCAGTCCACGGGCATATA----- mirR 18 119
-----CATGCAGTCCACGGGCATATAC----- mirR 22 101
-----CATGCAGTCCACGGGCATATACAC----- mirR 24 100
-----ATGCAGTCCACGGGCATATAC----- mirR 21 82
-----CAGTCCACGGGCATATACAC----- mirR 20 79
-----ATGCAGTCCACGGGCATAT----- mirR 19 44
-----AGTCCACGGGCATATACA----- mirR 18 41
-----ATGCAGTCCACGGGCATATA----- mirR 20 37
-----CAGTCCACGGGCATATACA----- mirR 19 36
-----CATGCAGTCCACGGGCATATA----- mirR 21 27
-----TGCAGTCCACGGGCATATAC----- mirR 20 25
-----CATGCAGTCCACGGGCATATACACT----- mirR 25 22
-----TGCAGTCCACGGGCATATACACT----- mirR 24 20
-----CATGCAGTCCACGGGCATAT----- mirR 20 17
-----ATGCAGTCCACGGGCATA----- mirR 18 17
-----AGTCCACGGGCATATACACT----- mirR 21 16
-----AGTCCACGGGCATATACAC----- mirR 19 16
-----CAGTCCACGGGCATATAC----- mirR 18 16
-----TGCAGTCCACGGGCATAT----- mirR 18 14
-----TGCAGTCCACGGGCATATA----- mirR 19 7
-----CAGTCCACGGGCATATACACTTGC----- mirR 24 5
-----CATGCAGTCCACGGGCATA----- mirR 19 4
-----GTCCACGGGCATATACAC----- mirR 18 3
-----AGTCCACGGGCATATACACTTG----- mirR 22 1
-----GTCCACGGGCATATACACT----- mirR 20 1
-----GCCTCAAGGTCTATGTCATC----- morR 20 9
-----GCCTCAAGGTCTATGTCAT----- morR 19 9
-----GCCTCAAGGTCTATGTCA----- morR 18 5
-----ACTTGCTCAAGGTCTAT----- morR 18 1
-----CTCAAGGTCTATGTCATCGAGG morR 22 1
-----TGCCTCAAGGTCTATGTC----- morR 18 1
```

>mmu-mir-1937b-1

```
GAGAACTGGGGTAGGCCACAAATCCCGGACGAGCCCCACATGTAAGACCCCCATGCTGGGCTCTGCTTAAGTCCCGGGATGAGCTGGCCAACACCCCAACATCTTGAGAGAAAACCATACCTGATGCAAAGTCAAGAG
-AGAACTGGGGTAGGCCAC-
GAGAACTGGGGTAGGCCA-
-----ACTGGGGTAGGCCACAAAT-----
-----ATCCCGGACGAGCCCCAC-----
-----TCCCGGACGAGCCCCAC-----
-----ATCCCGGACGAGCCCCACA-----
-----TCCCGGACGAGCCCCACA-----
-----ATCCCGGACGAGCCCCACAT-----
-----CAAATCCCGGACGAGCCCCAC-----
-----TCCCGGACGAGCCCCACAT-----
-----AAATCCCGGACGAGCCCCAC-----
```



-----ATCCCGACGAGCCCCACATG-----  
-----AATCCCGACGAGCCCCAC-----  
-----CCCGACGAGCCCCACA-----  
-----CAAATCCCGACGAGCCCCACATG-----  
-----TCCCGACGAGCCCCACATG-----  
-----TCCCGACGAGCCCCACATGT-----  
-----CAAATCCCGACGAGCCCCACAT-----  
-----CCCGACGAGCCCCACAT-----  
-----AATCCCGACGAGCCCCACAT-----  
-----CCGACGAGCCCCACAT-----  
-----CCGACGAGCCCCACATGTA-----  
-----CCCGACGAGCCCCACATG-----  
-----AATCCCGACGAGCCCCACA-----  
-----CCCGACGAGCCCCACATGT-----  
-----ATCCCGACGAGCCCCACATGT-----  
-----CAAATCCCGACGAGCCCCACA-----  
-----CAAATCCCGACGAGCCCCACATGT-----  
-----AATCCCGACGAGCCCCACATG-----  
-----CAAAGAG-----  
-----ATGCAAAGAG-----  
-----

>mmu-mir-1937b-3

TTGGGGTAGGCCATAAAATCCCGACGAGCCCCACATGTAAGATCCCGAAGCTTAGTCTCTGCTCAAGTCCCGGGATGAGCTGGCTAGCACCCCAATGACTCAAGAGAAAACCACACCTGATGCAAAGAGGTTT  
TTGGGGTAGGCCATAAAATC-----  
-TGGGGTAGGCCATAAAATC-----  
-----ATCCCGACGAGCCCCAC-----  
-----TCCCGACGAGCCCCAC-----  
-----ATCCCGACGAGCCCCACA-----  
-----TCCCGACGAGCCCCACA-----  
-----ATCCCGACGAGCCCCACAT-----  
-----TCCCGACGAGCCCCACAT-----  
-----AAATCCCGACGAGCCCCAC-----  
-----ATCCCGACGAGCCCCACATG-----  
-----AATCCCGACGAGCCCCAC-----  
-----CCCGACGAGCCCCACA-----  
-----TCCCGACGAGCCCCACATG-----  
-----TCCCGACGAGCCCCACATGT-----  
-----CCCGACGAGCCCCACAT-----  
-----AATCCCGACGAGCCCCACAT-----  
-----CCGACGAGCCCCACAT-----  
-----CCGACGAGCCCCACATGTA-----  
-----TAAATCCCGACGAGCCCC-----  
-----CCCGACGAGCCCCACATG-----  
-----AATCCCGACGAGCCCCACA-----  
-----AATCCCGACGAGCCCCACATG-----

```
-----TAAATCCCGGACGAGCCCCCA-----
-----ATCCCGGACGAGCCCCACATGT-----
-----CCCGGACGAGCCCCACATGT-----
-----
-----
-----
-----
-----
-----
-----
-----
```

>mmu-mir-664

| Sequence                                                                                            | species | len | reads |
|-----------------------------------------------------------------------------------------------------|---------|-----|-------|
| GACTTTGGAACATTGAAGCTGGCTGGGAAAAATGACTGGATAGAAAACATTATTCTATTCATTTACTCCCCAGCCTACACATGAAAGCAATAACAGCAC | morL    | 18  | 1     |
| GACTTTGGAACATTGAAG                                                                                  | morL    | 18  | 1     |
| --CTTTGGAACATTGAAGCT--                                                                              | mirL    | 22  | 1427  |
| -----CTGGCTGGGAAAAATGACTGGA-----                                                                    | mirL    | 21  | 350   |
| -----CTGGCTGGGAAAAATGACTGG-----                                                                     | mirL    | 23  | 283   |
| -----CTGGCTGGGAAAAATGACTGGAT-----                                                                   | mirL    | 22  | 45    |
| -----GCTGGCTGGGAAAAATGACTGG-----                                                                    | mirL    | 21  | 42    |
| -----TGGCTGGGAAAAATGACTGGA-----                                                                     | mirL    | 24  | 35    |
| -----GCTGGCTGGGAAAAATGACTGGAT-----                                                                  | mirL    | 24  | 35    |
| -----CTGGCTGGGAAAAATGACTGGATA-----                                                                  | mirL    | 22  | 35    |
| -----TGGCTGGGAAAAATGACTGGAT-----                                                                    | mirL    | 23  | 28    |
| -----GCTGGCTGGGAAAAATGACTGGA-----                                                                   | mirL    | 20  | 28    |
| -----TGGCTGGGAAAAATGACTGG-----                                                                      | mirL    | 18  | 17    |
| -----CTGGCTGGGAAAAATGAC-----                                                                        | mirL    | 23  | 15    |
| -----TGGCTGGGAAAAATGACTGGATA-----                                                                   | mirL    | 20  | 9     |
| -----CTGGCTGGGAAAAATGACTG-----                                                                      | mirL    | 25  | 3     |
| -----CTGGCTGGGAAAAATGACTGGATAG-----                                                                 | mirL    | 24  | 3     |
| -----TGGCTGGGAAAAATGACTGGATAG-----                                                                  | mirL    | 25  | 3     |
| -----GCTGGCTGGGAAAAATGACTGGATA-----                                                                 | mirL    | 20  | 2     |
| -----GGCTGGGAAAAATGACTGGA-----                                                                      | mirL    | 22  | 1     |
| -----AGCTGGCTGGGAAAAATGACTG-----                                                                    | mirL    | 18  | 1     |
| -----TGGCTGGGAAAAATGACT-----                                                                        | mirL    | 21  | 1     |
| -----GCTGGCTGGGAAAAATGACTG-----                                                                     | mirL    | 18  | 1     |
| -----AAGCTGGCTGGGAAAAAT-----                                                                        | mirL    | 20  | 1     |
| -----AGCTGGCTGGGAAAAATGAC-----                                                                      | mirL    | 19  | 1     |
| -----TGGCTGGGAAAAATGACTG-----                                                                       | mirL    | 21  | 1     |
| -----AGCTGGCTGGGAAAAATGACT-----                                                                     | mirL    | 25  | 1     |
| -----AGCTGGCTGGGAAAAATGACTGGAT-----                                                                 | loop    | 18  | 1     |
| -----TAGAAAACATTATTCTAT-----                                                                        | mirR    | 23  | 3552  |
| -----TATTCATTTACTCCCCAGCCTAC-----                                                                   | mirR    | 22  | 3536  |
| -----TATTCATTTACTCCCCAGCCTA-----                                                                    | mirR    | 24  | 2188  |
| -----TATTCATTTACTCCCCAGCCTACA-----                                                                  | mirR    | 22  | 625   |
| -----ATTCATTTACTCCCCAGCCTAC-----                                                                    | mirR    | 21  | 564   |
| -----TATTCATTTACTCCCCAGCCT-----                                                                     | mirR    | 22  | 390   |
| -----TTCATTTACTCCCCAGCCTACA-----                                                                    | mirR    | 23  | 360   |
| -----ATTCATTTACTCCCCAGCCTACA-----                                                                   |         |     |       |

```

-----ATTCATTTACTCCCCAGCCTA----- mirR 21 343
-----TATTCATTTACTCCCCAGCCTACAC----- mirR 25 300
-----TATTCATTTACTCCCCAGCCTACACA----- mirR 26 119
-----TCATTTACTCCCCAGCCTA----- mirR 19 117
-----ATTCATTTACTCCCCAGCCTACAC----- mirR 24 99
-----TTCATTTACTCCCCAGCCTAC----- mirR 21 91
-----TTCATTTACTCCCCAGCCTA----- mirR 20 77
-----TATTCATTTACTCCCCAG----- mirR 18 67
-----ATTCATTTACTCCCCAGCCT----- mirR 20 52
-----TCATTTACTCCCCAGCCTACA----- mirR 21 51
-----TTCATTTACTCCCCAGCCTACAC----- mirR 23 47
-----TCATTTACTCCCCAGCCTACACA----- mirR 23 29
-----TCATTTACTCCCCAGCCTACAC----- mirR 22 20
-----TCATTTACTCCCCAGCCTAC----- mirR 20 18
-----ATTCATTTACTCCCCAGC----- mirR 18 15
-----ATTCATTTACTCCCCAGCCTACACA----- mirR 25 12
-----TCATTTACTCCCCAGCCTACACAT----- mirR 24 5
-----TTCATTTACTCCCCAGCCTACACAT----- mirR 25 4
-----TTCATTTACTCCCCAGCCTACACA----- mirR 24 3
-----TTCATTTACTCCCCAGCC----- mirR 18 2
-----CTATTCATTTACTCCCCA----- mirR 18 2
-----CTATTCATTTACTCCCCAGCCTA----- mirR 23 1
-----TCTATTCATTTACTCCCCAGCCTACA----- mirR 26 1
-----TCATTTACTCCCCAGCCT----- mirR 18 1
-----CTATTCATTTACTCCCCAGCCTACACAT----- mirR 28 1
-----CTATTCATTTACTCCCCAGCC----- mirR 21 1
-----CTATTCATTTACTCCCCAGC----- mirR 20 1
-----ATGAAAGCAATAACAGCA----- morR 18 1
-----ACATGAAAGCAATAACAGCAC----- morR 21 1
-----CATGAAAGCAATAACAGC----- morR 18 1

```

>mmu-mir-539

```

TGCTACTGTTTCATACTTGAGGAGAAATTATCCTTGGTGTGTTGGCTCTTTTGGATGAATCATAACAAGGATAATTTCTTTTGGAGTATCAAATACTGCCCTG species len reads
-GCTACTGTTTCATACTTGAGG----- morL 19 18
--CTACTGTTTCATACTTGAGG----- morL 20 3
TGCTACTGTTTCATACTTGAGG----- morL 20 3
-GCTACTGTTTCATACTTGAGG----- morL 18 3
----CTGTTTCATACTTGAGGA----- morL 18 2
--CTACTGTTTCATACTTGAGG----- morL 19 1
--CTACTGTTTCATACTTGAGG----- morL 18 1
-----GGAGAAATTATCCTTGGTGTGTT----- mirL 23 7498
-----GGAGAAATTATCCTTGGTGTGTT----- mirL 22 5449
-----GGAGAAATTATCCTTGGTGTGTTG----- mirL 24 972
-----GGAGAAATTATCCTTGGTGTGTT----- mirL 21 358
-----GGAGAAATTATCCTTGGTGTGTT----- mirL 20 204
-----GGAGAAATTATCCTTGGTGTGTTG----- mirL 25 52

```

```

-----GAGAAATTATCCTTGGTGTGT----- mirL 21 44
-----GGAGAAATTATCCTTGGTGT----- mirL 19 38
-----GAAATTATCCTTGGTGTGT----- mirL 19 24
-----AGAAATTATCCTTGGTGTGT----- mirL 20 19
-----GAGAAATTATCCTTGGTGT----- mirL 19 9
-----GAGAAATTATCCTTGGTGTG----- mirL 20 9
-----AGAAATTATCCTTGGTGTGTT----- mirL 21 6
-----AGGAGAAATTATCCTTGGTGTGT----- mirL 23 5
-----AGAAATTATCCTTGGTGTG----- mirL 19 5
-----GAGGAGAAATTATCCTTG----- mirL 18 2
-----AGAAATTATCCTTGGTGT----- mirL 18 1
-----GAGGAGAAATTATCCTTGGTGTGT----- mirL 24 1
-----GAAATTATCCTTGGTGTG----- mirL 18 1
-----GAGAAATTATCCTTGGTGTGTT----- mirL 22 1
-----GAAATTATCCTTGGTGTGTTG----- mirL 21 1
-----AGGAGAAATTATCCTTGG----- mirL 18 1
-----TGGCTCTTTTGGATGAATCAT----- loop 21 1
-----GGCTCTTTTGGATGAATC----- loop 18 1
-----CATACAAGGATAAATTTCTTTT----- mirR 22 34
-----ATACAAGGATAAATTTCTTTTGA----- mirR 23 10
-----ATACAAGGATAAATTTCTTTTGG----- mirR 22 9
-----CATACAAGGATAAATTTCTTTT----- mirR 21 1
-----TCATACAAGGATAAATTC----- mirR 18 1
-----TGAGTATCAAATACTGCC--- morR 18 9
-----TGAGTATCAAATACTGCC-- morR 19 1
-----GTATCAAATACTGCCCTG morR 18 1

>mmu-mir-33
CACCTCCTGGCGGGCAGCTGTGGTGCATTGTAGTTGCATTGCATGTTCTGGCAATACCTGTGCAATGTTCCACAGTGCATCACGGAGGCCTGCCCTGACTGCCACGGTGCCG species len reads
---CTCCTGGCGGGCAGCTGTG----- morL 19 54
---CCTGGCGGGCAGCTGTG----- morL 18 48
--CCTCCTGGCGGGCAGCTGTG----- morL 20 36
---TCCTGGCGGGCAGCTGTG----- morL 18 34
---CTCCTGGCGGGCAGCTGTGG----- morL 20 27
--CCTCCTGGCGGGCAGCTGTGG----- morL 21 15
---CTGGCGGGCAGCTGTGGT----- morL 18 14
---CTCCTGGCGGGCAGCTGT----- morL 18 12
-ACCTCCTGGCGGGCAGCTGTG----- morL 21 11
---TCCTGGCGGGCAGCTGTGG----- morL 19 8
--CCTCCTGGCGGGCAGCTGT----- morL 19 3
CACCTCCTGGCGGGCAGCTGTG----- morL 22 2
-ACCTCCTGGCGGGCAGCTGT----- morL 20 2
--CCTCCTGGCGGGCAGCTG----- morL 18 1
-ACCTCCTGGCGGGCAGCTGTGG----- morL 22 1
CACCTCCTGGCGGGCAGCTGT----- morL 21 1
-----TGGCGGGCAGCTGTGGT----- morL 18 1

```

```

---CTCCTGGCGGGCAGCTGTGGT----- morL 21 1
---CCTGGCGGGCAGCTGTGGT----- morL 19 1
--CCTCCTGGCGGGCAGCTGTGGT----- morL 22 1
-----GTGCATTGTAGTTGCATTGC----- mirL 20 2910
-----GTGCATTGTAGTTGCATTGCA----- mirL 21 2651
-----GTGCATTGTAGTTGCATTG----- mirL 19 481
-----GTGCATTGTAGTTGCATTGCAT----- mirL 22 138
-----GTGCATTGTAGTTGCATT----- mirL 18 102
-----GTGCATTGTAGTTGCATTGCATG----- mirL 23 101
-----GTGCATTGTAGTTGCATTGCATGT----- mirL 24 25
-----CATTGTAGTTGCATTGCA----- mirL 18 7
-----TGCATTGTAGTTGCATTG----- mirL 18 2
-----GCATTGTAGTTGCATTGCA----- mirL 19 2
-----GCATTGTAGTTGCATTGC----- mirL 18 1
-----TGCATTGTAGTTGCATTGC----- mirL 19 1
-----TGTTCTGGCAATACCTGTG----- loop 19 18
-----GTTCTGGCAATACCTGTG----- loop 18 3
-----TGTTCTGGCAATACCTGT----- loop 18 3
-----TGTTCTGGCAATACCTGTGC----- loop 20 3
-----CAATGTTTCCACAGTGCATCA----- mirR 21 5972
-----CAATGTTTCCACAGTGCATC----- mirR 20 816
-----CAATGTTTCCACAGTGCATCAC----- mirR 22 595
-----CAATGTTTCCACAGTGCAT----- mirR 19 260
-----CAATGTTTCCACAGTGCATCACG----- mirR 23 153
-----CAATGTTTCCACAGTGCATCACGG----- mirR 24 36
-----CAATGTTTCCACAGTGCATCACGGA----- mirR 25 36
-----AATGTTTCCACAGTGCATCAC----- mirR 21 23
-----TGTTTCCACAGTGCATCA----- mirR 18 13
-----AATGTTTCCACAGTGCATCA----- mirR 20 10
-----AATGTTTCCACAGTGCATCACG----- mirR 22 6
-----ATGTTTCCACAGTGCATCA----- mirR 19 3
-----AATGTTTCCACAGTGCATCACGG----- mirR 23 2
-----TGCAAATGTTTCCACAGTGCATC----- mirR 22 1
-----AATGTTTCCACAGTGCATC----- mirR 19 1
-----CGGAGGCCTGCCCTGACTGCC----- morR 21 26
-----CGGAGGCCTGCCCTGACTGCCACGGTGC----- morR 29 21
-----CGGAGGCCTGCCCTGACTGCC----- morR 22 15
-----CGGAGGCCTGCCCTGACTGC----- morR 20 11
-----CGGAGGCCTGCCCTGACTGCCACGGTGCC----- morR 30 8
-----CGGAGGCCTGCCCTGACTGCCACGGTGCCG----- morR 31 6
-----CGGAGGCCTGCCCTGACTGCCACGGTG----- morR 28 6
-----AGGCCTGCCCTGACTGCC----- morR 18 1
-----GGAGGCCTGCCCTGACTGC----- morR 19 1

```

>mmu-mir-542

ACATGCAGGGATCTCAGACGTCTCGGGGATCATCATGTCACGAGATACCACTGTGCCCTTGACAGATTGATAACTGAAAGGTCTGGGAGCCACTCCTCTT species len reads

```

-CATGCAGGGATCTCAGACGT----- morL 20 6
ACATGCAGGGATCTCAGA----- morL 18 3
--ATGCAGGGATCTCAGACG----- morL 18 3
---GCAGGGATCTCAGACGTC----- morL 18 1
--ATGCAGGGATCTCAGACGTCT----- morL 21 1
---TGCAGGGATCTCAGACGT----- morL 18 1
-----CTCGGGGATCATCATGTCACG----- mirL 21 3100
-----CTCGGGGATCATCATGTCACGA----- mirL 22 2191
-----CTCGGGGATCATCATGTCA----- mirL 19 445
-----TCGGGGATCATCATGTCACGAGA----- mirL 23 242
-----TCGGGGATCATCATGTCACGAG----- mirL 22 178
-----TCGGGGATCATCATGTCACGA----- mirL 21 142
-----CTCGGGGATCATCATGTCAC----- mirL 20 113
-----CTCGGGGATCATCATGTCACGAG----- mirL 23 106
-----GGGGATCATCATGTCACG----- mirL 18 56
-----CGGGGATCATCATGTCACGA----- mirL 20 44
-----TCGGGGATCATCATGTCACG----- mirL 20 44
-----CGGGGATCATCATGTCACG----- mirL 19 38
-----GGGGATCATCATGTCACGA----- mirL 19 36
-----GGGGATCATCATGTCACGAG----- mirL 20 36
-----CTCGGGGATCATCATGTC----- mirL 18 36
-----CGGGGATCATCATGTCACGAG----- mirL 21 24
-----CTCGGGGATCATCATGTCACGAGA----- mirL 24 23
-----TCTCGGGGATCATCATGTCACG----- mirL 22 13
-----TCGGGGATCATCATGTCAC----- mirL 19 9
-----TCGGGGATCATCATGTCA----- mirL 18 8
-----TCTCGGGGATCATCATGTCA----- mirL 20 7
-----TCGGGGATCATCATGTCACGAGATA----- mirL 25 3
-----CGGGGATCATCATGTCAC----- mirL 18 2
-----TGTGACAGATTGATAACTGA----- mirR 20 1899
-----TGTGACAGATTGATAACTGAA----- mirR 21 1664
-----TGTGACAGATTGATAACTGAAA----- mirR 22 1524
-----TGTGACAGATTGATAACTGAAAG----- mirR 23 1186
-----TGTGACAGATTGATAACTGAAAGG----- mirR 24 607
-----TGTGACAGATTGATAACT----- mirR 18 195
-----TGTGACAGATTGATAACTG----- mirR 19 141
-----GTGACAGATTGATAACTGA----- mirR 19 94
-----GTGACAGATTGATAACTGAA----- mirR 20 77
-----GTGACAGATTGATAACTGAAA----- mirR 21 69
-----GTGACAGATTGATAACTGAAAG----- mirR 22 41
-----TGACAGATTGATAACTGA----- mirR 18 33
-----GACAGATTGATAACTGAA----- mirR 18 28
-----GTGACAGATTGATAACTGAAAGG----- mirR 23 21
-----TGACAGATTGATAACTGAA----- mirR 19 17
-----TTGTGACAGATTGATAACTGA----- mirR 21 15
-----TGACAGATTGATAACTGAAA----- mirR 20 14

```

```

-----GACAGATTGATAACTGAAA----- mirR 19 13
-----TGACAGATTGATAACTGAAAGG----- mirR 22 7
-----GTGACAGATTGATAACTG----- mirR 18 7
-----GTGACAGATTGATAACTGAAAGGT----- mirR 24 2
-----TTGTGACAGATTGATAACTGAAA----- mirR 23 2
-----GACAGATTGATAACTGAAAG----- mirR 20 2
-----TTGTGACAGATTGATAAC----- mirR 18 1
-----GACAGATTGATAACTGAAAGG----- mirR 21 1
-----TGACAGATTGATAACTGAAAGGT----- mirR 23 1
-----TTGTGACAGATTGATAACT----- mirR 19 1
-----CTTGTGACAGATTGATAAC----- mirR 19 1
-----TTGTGACAGATTGATAACTGAA----- mirR 22 1
-----TGAAAGGTCTGGGAGCCA----- morR 18 11
-----GGTCTGGGAGCCACTCCT--- morR 18 2
-----AGGTCTGGGAGCCACTCC--- morR 18 2
-----GTCTGGGAGCCACTCCTCT morR 20 1
-----GAAAGGTCTGGGAGCCACTCC--- morR 21 1
-----GAAAGGTCTGGGAGCCAC----- morR 18 1
-----GTCTGGGAGCCACTCCTC-- morR 18 1

```

>mmu-mir-503

| Sequence                                                                                                                | Species | len | reads |
|-------------------------------------------------------------------------------------------------------------------------|---------|-----|-------|
| AGCCCATCCCACTCAGTCGTGCCCTAGCAGCGGGAACAGTACTGCAGTGAGTGTGGTGGCCCTGGAGTATGTTTCCACTGCCTGGGTAAGTCTGGGTCTTCCACATGGGCACACCCACC | morL    | 18  | 4558  |
| -----ATCCCACTCAGTCGTGCC-----                                                                                            | morL    | 19  | 394   |
| -----ATCCCACTCAGTCGTGCC-----                                                                                            | morL    | 20  | 139   |
| -----TCCCACTCAGTCGTGCC-----                                                                                             | morL    | 18  | 81    |
| -----ATCCCACTCAGTCGTGCCCT-----                                                                                          | morL    | 20  | 34    |
| AGCCCATCCCACTCAGTCGTGCC-----                                                                                            | morL    | 24  | 16    |
| -----CCCCTCAGTCGTGCCCT-----                                                                                             | morL    | 18  | 11    |
| -----CCATCCCACTCAGTCGTGCC-----                                                                                          | morL    | 21  | 9     |
| -----TCCCACTCAGTCGTGCCCT-----                                                                                           | morL    | 19  | 8     |
| -----CATCCCACTCAGTCGTGCCCT-----                                                                                         | morL    | 21  | 7     |
| -----CATCCCACTCAGTCGTGCC-----                                                                                           | morL    | 19  | 5     |
| -----CCCCTCAGTCGTGCCCTA-----                                                                                            | morL    | 19  | 5     |
| -----ATCCCACTCAGTCGTGCCCTA-----                                                                                         | morL    | 21  | 3     |
| -----CCCATCCCACTCAGTCGTGCC-----                                                                                         | morL    | 22  | 2     |
| -----CATCCCACTCAGTCGTGCC-----                                                                                           | morL    | 18  | 1     |
| -----ATCCCACTCAGTCGTGCCCTAG-----                                                                                        | morL    | 22  | 1     |
| -----CCATCCCACTCAGTCGTGCC-----                                                                                          | morL    | 20  | 1     |
| -----GCCCATCCCACTCAGTCGTGCC-----                                                                                        | morL    | 23  | 1     |
| -----CCATCCCACTCAGTCGTGCC-----                                                                                          | morL    | 18  | 1     |
| -----TAGCAGCGGGAACAGTACTGCAG-----                                                                                       | mirL    | 23  | 3544  |
| -----TAGCAGCGGGAACAGTACTGC-----                                                                                         | mirL    | 21  | 1026  |
| -----TAGCAGCGGGAACAGTACTGCAGT-----                                                                                      | mirL    | 24  | 592   |
| -----TAGCAGCGGGAACAGTACTGCA-----                                                                                        | mirL    | 22  | 543   |
| -----TAGCAGCGGGAACAGTACTG-----                                                                                          | mirL    | 20  | 458   |

```

-----AGCAGCGGGAACAGTACTGCAG----- mirL 22 140
-----TAGCAGCGGGAACAGTACTGCAGTG----- mirL 25 82
-----TAGCAGCGGGAACAGTACT----- mirL 19 80
-----AGCAGCGGGAACAGTACTGCAGT----- mirL 23 34
-----AGCAGCGGGAACAGTACTGC----- mirL 20 22
-----AGCAGCGGGAACAGTACTGCA----- mirL 21 15
-----AGCAGCGGGAACAGTACT----- mirL 18 14
-----GCAGCGGGAACAGTACTGCAG----- mirL 21 13
-----CAGCGGGAACAGTACTGC----- mirL 18 12
-----AGCAGCGGGAACAGTACTG----- mirL 19 8
-----GCAGCGGGAACAGTACTGC----- mirL 19 7
-----GCAGCGGGAACAGTACTG----- mirL 18 6
-----CAGCGGGAACAGTACTGCAG----- mirL 20 6
-----CCCTAGCAGCGGGAACAGTACTGCAG----- mirL 26 5
-----CTAGCAGCGGGAACAGTACTGCAG----- mirL 24 5
-----AGCAGCGGGAACAGTACTGCAGTGA----- mirL 25 3
-----CAGCGGGAACAGTACTGCAGTGA----- mirL 23 3
-----CTAGCAGCGGGAACAGTACTGC----- mirL 22 2
-----CAGCGGGAACAGTACTGCAGT----- mirL 21 1
-----TGAGTGTTTGGTGCCCTG----- loop 18 3
-----AGTGTTTGGTGCCCTGGA----- loop 18 2
-----CAGTGAGTGTTTGGTGCC----- loop 18 1
-----AGTGAGTGTTTGGTGCCC----- loop 18 1
-----TGAGTGTTTGGTGCCCTGGA----- loop 20 1
-----GAGTGTTTGGTGCCCTGG----- loop 18 1
-----GTGAGTGTTTGGTGCCCTG----- loop 19 1
-----GGAGTATTGTTTCCACTGCCTGG----- mirR 23 1281
-----GAGTATTGTTTCCACTGCCTGG----- mirR 22 521
-----GAGTATTGTTTCCACTGCCTG----- mirR 21 175
-----GGAGTATTGTTTCCACTGCCTGGG----- mirR 24 94
-----GAGTATTGTTTCCACTGCCT----- mirR 20 71
-----GGAGTATTGTTTCCACTGCCTG----- mirR 22 57
-----GAGTATTGTTTCCACTGCCTGGGT----- mirR 24 42
-----GAGTATTGTTTCCACTGCCTGGG----- mirR 23 28
-----GGAGTATTGTTTCCACTGCCTGGGT----- mirR 25 16
-----GGAGTATTGTTTCCACTGCCT----- mirR 21 14
-----GAGTATTGTTTCCACTGCC----- mirR 19 11
-----GTATTGTTTCCACTGCCTGG----- mirR 20 10
-----GAGTATTGTTTCCACTGC----- mirR 18 7
-----GGAGTATTGTTTCCACTG----- mirR 18 6
-----GGAGTATTGTTTCCACTGC----- mirR 19 5
-----GTATTGTTTCCACTGCCTG----- mirR 19 3
-----AGTATTGTTTCCACTGCC----- mirR 18 1
-----AGTATTGTTTCCACTGCCTGG----- mirR 21 1
-----CTGGAGTATTGTTTCCACT----- mirR 19 1
-----TGGAGTATTGTTTCCACTG----- mirR 19 1

```



```

-----AGTATTGTTTCCACTGCCTGGGT----- mirR 23 1
-----CTGGAGTATTGTTTCCACTGC----- mirR 21 1
-----GGGTAAGTCTGGGTCTTC----- morR 18 3
-----GTAAGTCTGGGTCTTCCACATGGGCACACCAC- morR 33 1
-----TAAGTCTGGGTCTTCCAC----- morR 18 1
-----TGGGTAAGTCTGGGTCTT----- morR 18 1
-----GTAAGTCTGGGTCTTCCACATGGGCACACCACC morR 34 1

```

>mmu-mir-466g

| Species | len | reads |
|---------|-----|-------|
| morL    | 20  | 60    |
| morL    | 21  | 23    |
| morL    | 23  | 17    |
| morL    | 21  | 16    |
| morL    | 25  | 9     |
| morL    | 22  | 8     |
| morL    | 19  | 2     |
| morL    | 23  | 2     |
| morL    | 22  | 1     |
| morL    | 18  | 1     |
| morL    | 18  | 1     |
| mirL    | 20  | 558   |
| mirL    | 19  | 21    |
| mirL    | 21  | 21    |
| mirL    | 26  | 18    |
| mirL    | 22  | 15    |
| mirL    | 23  | 9     |
| mirL    | 22  | 8     |
| mirL    | 21  | 2     |
| mirL    | 18  | 2     |
| mirL    | 23  | 1     |
| mirL    | 22  | 1     |
| loop    | 18  | 2     |
| mirR    | 21  | 5432  |
| mirR    | 22  | 3386  |
| mirR    | 20  | 1089  |
| mirR    | 22  | 813   |
| mirR    | 18  | 490   |
| mirR    | 19  | 428   |
| mirR    | 23  | 239   |
| mirR    | 21  | 223   |
| mirR    | 23  | 177   |
| mirR    | 24  | 63    |
| mirR    | 20  | 62    |
| mirR    | 20  | 58    |
| mirR    | 24  | 50    |

```
-----TATACAGACACATGCACAC----- mirR 19 47
-----ACAGACACATGCACACACA----- mirR 19 38
-----CATATACAGACACATGCACACAC----- mirR 23 23
-----ACAGACACATGCACACACAT----- mirR 20 18
-----CATATACAGACACATGCACACA----- mirR 22 15
-----TACAGACACATGCACACACAT----- mirR 21 15
-----TATACAGACACATGCACA----- mirR 18 13
-----CATATACAGACACATGCACAC----- mirR 21 11
-----TACAGACACATGCACACAC----- mirR 19 10
-----CAGACACATGCACACACAT----- mirR 19 7
-----ACAGACACATGCACACACATGC----- mirR 22 7
-----ATATACAGACACATGCACACACA----- mirR 23 7
-----ATATACAGACACATGCACACA----- mirR 21 4
-----CAGACACATGCACACACA----- mirR 18 4
-----TACAGACACATGCACACACATG----- mirR 22 4
-----ACAGACACATGCACACAC----- mirR 18 3
-----ATATACAGACACATGCACACAC----- mirR 22 3
-----ACAGACACATGCACACACATG----- mirR 21 2
-----TACAGACACATGCACACA----- mirR 18 2
-----CATATACAGACACATGCACA----- mirR 20 1
-----ACAGACACATGCACACACATGCG----- mirR 23 1
-----ATATACAGACACATGCACACACAT----- mirR 24 1
-----CATATACAGACACATGCAC----- mirR 19 1
-----ATATACAGACACATGCAC----- mirR 18 1
-----CAGACACATGCACACACATG----- mirR 20 1
-----ATATACAGACACATGCACAC----- mirR 20 1
-----CAGACACATGCACACACATGCG----- mirR 22 1
-----ATGCGGCACACACACACACACA----- morR 22 27
-----ATGCGGCACACACACACACAC----- morR 21 24
-----CGGCACACACACACACAC----- morR 18 9
-----ATGCGGCACACACACACACA----- morR 20 9
-----ATGCGGCACACACACACAC----- morR 19 5
-----CGGCACACACACACACAC----- morR 20 4
-----ATGCGGCACACACACACACAC----- morR 23 3
-----ATGCGGCACACACACACACACA----- morR 24 2
-----ACATGCGGCACACACACACAC----- morR 21 2
-----GGCACACACACACACACACA----- morR 20 2
-----GCGGCACACACACACACAC----- morR 19 2
-----TGCGGCACACACACACACAC----- morR 22 2
-----GCGGCACACACACACACACAA----- morR 23 2
-----GGCACACACACACACACAC----- morR 19 2
-----CATGCGGCACACACACACACAC----- morR 22 1
-----ATGCGGCACACACACACA----- morR 18 1
-----ACATGCGGCACACACACACA----- morR 22 1
-----ACATGCGGCACACACACA----- morR 18 1
-----GCGGCACACACACACACAC----- morR 21 1
```

```

-----GCGGCACACACACACACACACAAA morR 24 1
-----CGGCACACACACACACACAAA- morR 22 1
-----CATGCGGCACACACACACACACAC--- morR 24 1

>mmu-mir-380
CTCTCCATGGTACCTGAAAAGATGGTTGACCATAGAACATGCGCTACTTCTGTGTCGTATGTAGTATGGTCCACATCTTCTCGTTATCAAAGTCATTCGTG species len reads
CTCTCCATGGTACCTGAAAAG----- morL 21 16
--CTCCATGGTACCTGAAAAG----- morL 19 10
-TCTCCATGGTACCTGAAAAG----- morL 20 10
--CTCCATGGTACCTGAAAAGA----- morL 20 2
-TCTCCATGGTACCTGAAAAGA----- morL 21 2
---TCCATGGTACCTGAAAAG----- morL 18 1
CTCTCCATGGTACCTGAAA----- morL 19 1
-----ATGGTACCTGAAAAGATG----- morL 18 1
-----ATGGTTGACCATAGAACATGCG----- mirL 22 891
-----TGGTTGACCATAGAACATGCGC----- mirL 22 389
-----TGGTTGACCATAGAACATGCG----- mirL 21 378
-----ATGGTTGACCATAGAACATGCG----- mirL 21 257
-----ATGGTTGACCATAGAACATGCGC----- mirL 23 209
-----ATGGTTGACCATAGAACATG----- mirL 20 198
-----TGGTTGACCATAGAACATG----- mirL 19 115
-----TGGTTGACCATAGAACATGCG----- mirL 20 67
-----GGTTGACCATAGAACATGCGC----- mirL 21 30
-----GTTGACCATAGAACATGCG----- mirL 19 24
-----ATGGTTGACCATAGAACATGCGCT----- mirL 24 20
-----GGTTGACCATAGAACATG----- mirL 18 13
-----GGTTGACCATAGAACATGCG----- mirL 20 10
-----TGGTTGACCATAGAACATGCGCT----- mirL 23 8
-----ATGGTTGACCATAGAACATGCGCTA----- mirL 25 8
-----ATGGTTGACCATAGAACAT----- mirL 19 8
-----GGTTGACCATAGAACATGCG----- mirL 19 7
-----GGTTGACCATAGAACATGCGCT----- mirL 22 6
-----GTTGACCATAGAACATGCGC----- mirL 20 4
-----TGGTTGACCATAGAACAT----- mirL 18 4
-----AAGATGGTTGACCATAGAACATGCG----- mirL 25 2
-----TGGTTGACCATAGAACATGCGCTAC----- mirL 25 1
-----GTTGACCATAGAACATGCG----- mirL 18 1
-----AGATGGTTGACCATAGAAC----- mirL 19 1
-----GCGCTACTTCTGTGTCGT----- loop 18 1
-----TATGTAGTATGGTCCACATCT----- mirR 21 6825
-----TATGTAGTATGGTCCACATCTT----- mirR 22 1464
-----TATGTAGTATGGTCCACAT----- mirR 19 908
-----TATGTAGTATGGTCCACATC----- mirR 20 377
-----ATGTAGTATGGTCCACATCT----- mirR 20 321
-----TATGTAGTATGGTCCACATCTT----- mirR 23 274
-----ATGTAGTATGGTCCACAT----- mirR 18 103

```

```

-----ATGTAGTATGGTCCACATCTT----- mirR 21 95
-----TATGTAGTATGGTCCACATCTT----- mirR 24 63
-----TATGTAGTATGGTCCACA----- mirR 18 36
-----ATGTAGTATGGTCCACATC----- mirR 19 32
-----GTAGTATGGTCCACATCTT----- mirR 19 29
-----ATGTAGTATGGTCCACATCTTC----- mirR 22 28
-----TGTAGTATGGTCCACATCT----- mirR 19 17
-----GTAGTATGGTCCACATCT----- mirR 18 10
-----TGTAGTATGGTCCACATCTT----- mirR 20 10
-----ATGTAGTATGGTCCACATCTTCT----- mirR 23 5
-----GTATGTAGTATGGTCCACATC----- mirR 21 4
-----ATGTAGTATGGTCCACATCTTCTC----- mirR 24 2
-----TCGTATGTAGTATGGTCCACATCT----- mirR 24 2
-----GTATGTAGTATGGTCCACATCT----- mirR 22 1
-----CGTATGTAGTATGGTCCAC----- mirR 19 1
-----TCTCGTTATCAAAGTCATTCGTG morR 23 7
-----TCGTTATCAAAGTCATTC--- morR 18 2
-----CTCGTTATCAAAGTCATT--- morR 18 2
-----CTCGTTATCAAAGTCATTC--- morR 19 1
-----TCTCGTTATCAAAGTCAT--- morR 18 1
-----CGTTATCAAAGTCATTCGTG morR 20 1

```

>mmu-mir-32

```

CCCTCTGCTTGCTCTGGTGGAGATATTGCACATTACTAAGTTGCATGTTGTGCACGGCCTCAATGCAATTTAGTGTGTGTGATATTTTCACATGAGTGCATGCACACGGGTCT species len reads
---TCTGCTTGCTCTGGTGGAGA--- morL 20 56
---CTGCTTGCTCTGGTGGAGA--- morL 19 38
CCCTCTGCTTGCTCTGGTGGAGA--- morL 23 4
---TCTGCTTGCTCTGGTGGAG--- morL 19 3
---CTGCTTGCTCTGGTGGAG--- morL 18 2
---TGCTTGCTCTGGTGGAGA--- morL 18 2
---TCTGCTTGCTCTGGTGGAG--- morL 18 1
---TTGCTCTGGTGGAGATAT--- morL 18 1
---GCTTGCTCTGGTGGAGAT--- morL 18 1
---CTCTGCTTGCTCTGGTGG--- morL 18 1
-----TATTGCACATTACTAAGTTGC----- mirL 21 3779
-----TATTGCACATTACTAAGTTGCA----- mirL 22 3251
-----TATTGCACATTACTAAGTTG----- mirL 20 357
-----TATTGCACATTACTAAGTTGCAT----- mirL 23 322
-----ATTGCACATTACTAAGTTGCA----- mirL 21 150
-----TATTGCACATTACTAAGTTGCATG----- mirL 24 119
-----ATTGCACATTACTAAGTTGC----- mirL 20 107
-----TATTGCACATTACTAAGT----- mirL 18 51
-----ATATTGCACATTACTAAGTTGCA----- mirL 23 45
-----TATTGCACATTACTAAGTT----- mirL 19 43
-----ATATTGCACATTACTAAGTTGC----- mirL 22 39
-----ATTGCACATTACTAAGTTGCAT----- mirL 22 35

```

```

-----TTGCACATTACTAAGTTGCA----- mirL 20 15
-----TTGCACATTACTAAGTTG----- mirL 18 14
-----ATATTGCACATTACTAAGTTG----- mirL 21 14
-----ATTGCACATTACTAAGTTGCATG----- mirL 23 9
-----TGCACATTACTAAGTTGCAT----- mirL 20 9
-----ATTGCACATTACTAAGTTG----- mirL 19 8
-----ATTGCACATTACTAAGTTGCATGT----- mirL 24 4
-----ATTGCACATTACTAAGTT----- mirL 18 3
-----TTGCACATTACTAAGTTGC----- mirL 19 2
-----ATATTGCACATTACTAAGTT----- mirL 20 2
-----ATATTGCACATTACTAAGTTGCATGT----- mirL 26 2
-----TGCACATTACTAAGTTGC----- mirL 18 2
-----TTGCACATTACTAAGTTGCAT----- mirL 21 1
-----TGTTGTCACGGCCTCAATG----- loop 19 45
-----TGTTGTCACGGCCTCAATGC----- loop 20 5
-----GTTGTCACGGCCTCAATG----- loop 18 5
-----TGTTGTCACGGCCTCAAT----- loop 18 4
-----CATGTTGTCACGGCCTCAATGC----- loop 22 3
-----GTTGTCACGGCCTCAATGC----- loop 19 1
-----CAATTTAGTGTGTGTGATATT----- mirR 21 2048
-----GCAATTTAGTGTGTGTGATATT----- mirR 22 1221
-----CAATTTAGTGTGTGTGATATTT----- mirR 22 740
-----GCAATTTAGTGTGTGTGATAT----- mirR 21 93
-----CAATTTAGTGTGTGTGATAT----- mirR 20 85
-----TGCAATTTAGTGTGTGTGATAT----- mirR 22 69
-----GCAATTTAGTGTGTGTGATATTT----- mirR 23 56
-----ATGCAATTTAGTGTGTGTGATAT----- mirR 23 45
-----CAATTTAGTGTGTGTGATA----- mirR 19 35
-----ATGCAATTTAGTGTGTGTGATA----- mirR 22 20
-----GCAATTTAGTGTGTGTGATA----- mirR 20 16
-----TGCAATTTAGTGTGTGTGATATT----- mirR 23 10
-----GCAATTTAGTGTGTGTGA----- mirR 18 9
-----CAATTTAGTGTGTGTGATATTT----- mirR 23 9
-----ATTTAGTGTGTGTGATATTT----- mirR 20 9
-----CAATTTAGTGTGTGTGAT----- mirR 18 9
-----ATTTAGTGTGTGTGATATT----- mirR 19 8
-----GCAATTTAGTGTGTGTGATATTT----- mirR 24 4
-----GCAATTTAGTGTGTGTGAT----- mirR 19 4
-----CAATTTAGTGTGTGTGATATTTTC----- mirR 24 2
-----TGCAATTTAGTGTGTGTGATA----- mirR 21 2
-----ATGCAATTTAGTGTGTGTGA----- mirR 20 1
-----ATGCAATTTAGTGTGTGTGATATT----- mirR 24 1
-----TTTAGTGTGTGTGATATT----- mirR 18 1
-----AATTTAGTGTGTGTGATATTT----- mirR 22 1
-----TGCAATTTAGTGTGTGTG----- mirR 18 1
-----TTCACATGAGTGCATGCACACGGG----- morR 24 10

```

|                                                                                                                   |         |     |       |
|-------------------------------------------------------------------------------------------------------------------|---------|-----|-------|
| -----CACATGAGTGCATGCACAC-----                                                                                     | morR    | 19  | 5     |
| -----TTCACATGAGTGCATGCACACGGGTC-----                                                                              | morR    | 26  | 3     |
| -----TTCACATGAGTGCATGCAC-----                                                                                     | morR    | 19  | 2     |
| -----ACATGAGTGCATGCACAC-----                                                                                      | morR    | 18  | 1     |
| -----TTCACATGAGTGCATGCACACGGGTCT-----                                                                             | morR    | 27  | 1     |
| -----CACATGAGTGCATGCACA-----                                                                                      | morR    | 18  | 1     |
| -----TTCACATGAGTGCATGCACACGG-----                                                                                 | morR    | 23  | 1     |
| -----TCACATGAGTGCATGCAC-----                                                                                      | morR    | 18  | 1     |
| <br>                                                                                                              |         |     |       |
| >mmu-mir-496                                                                                                      |         |     |       |
| CAAGCTCTCGAAATCAAGTGTTCGAATGGAGGTTGCCCATGGTGTGTTTCATTTATTTATGATGAGTATTACATGGCCAATCTCCTTTCCGGCACTAAAATCTTCCTGGGAGA | species | len | reads |
| -----GAAATCAAGTGTTCGAATGGA-----                                                                                   | morL    | 21  | 13    |
| CAAGCTCTCGAAATCAAGTGTTCGAATGGA-----                                                                               | morL    | 30  | 8     |
| -----AAATCAAGTGTTCGAATGG-----                                                                                     | morL    | 19  | 6     |
| -----AATCAAGTGTTCGAATGG-----                                                                                      | morL    | 18  | 5     |
| -----GAAATCAAGTGTTCGAATGGAG-----                                                                                  | morL    | 22  | 4     |
| -----GAAATCAAGTGTTCGAATGG-----                                                                                    | morL    | 20  | 4     |
| -----AAATCAAGTGTTCGAATGGA-----                                                                                    | morL    | 20  | 3     |
| -----ATCAAGTGTTCGAATGGA-----                                                                                      | morL    | 18  | 1     |
| -----AAATCAAGTGTTCGAATG-----                                                                                      | morL    | 18  | 1     |
| ---GCTCTCGAAATCAAGTGTTCGAATGG-----                                                                                | morL    | 26  | 1     |
| -----GGTTGCCCATGGTGTGTTTCATT-----                                                                                 | mirL    | 22  | 567   |
| -----AGGTTGCCCATGGTGTGTTCA-----                                                                                   | mirL    | 21  | 117   |
| -----AGGTTGCCCATGGTGTGTTTC-----                                                                                   | mirL    | 20  | 27    |
| -----GGTTGCCCATGGTGTGTTTCATTT-----                                                                                | mirL    | 23  | 18    |
| -----AGGTTGCCCATGGTGTGTTTCATT-----                                                                                | mirL    | 23  | 16    |
| -----GGTTGCCCATGGTGTGTTCA-----                                                                                    | mirL    | 20  | 13    |
| -----AGGTTGCCCATGGTGTGTTTCAT-----                                                                                 | mirL    | 22  | 11    |
| -----AGGTTGCCCATGGTGTGTT-----                                                                                     | mirL    | 19  | 8     |
| -----GGTTGCCCATGGTGTGTTTCATTTT-----                                                                               | mirL    | 24  | 8     |
| -----GGTTGCCCATGGTGTGTTTCAT-----                                                                                  | mirL    | 21  | 5     |
| -----GGTTGCCCATGGTGTGTT-----                                                                                      | mirL    | 18  | 5     |
| -----AGGTTGCCCATGGTGTGTTTCATTT-----                                                                               | mirL    | 24  | 4     |
| -----GGTTGCCCATGGTGTGTTTC-----                                                                                    | mirL    | 19  | 1     |
| -----AGGTTGCCCATGGTGTGTT-----                                                                                     | mirL    | 18  | 1     |
| -----AGTATTACATGGCCAATCTCC-----                                                                                   | mirR    | 21  | 4126  |
| -----TGAGTATTACATGGCCAATCTC-----                                                                                  | mirR    | 22  | 2183  |
| -----TGAGTATTACATGGCCAATCT-----                                                                                   | mirR    | 21  | 1662  |
| -----AGTATTACATGGCCAATCTCCT-----                                                                                  | mirR    | 22  | 952   |
| -----AGTATTACATGGCCAATCTC-----                                                                                    | mirR    | 20  | 934   |
| -----TGAGTATTACATGGCCAATCTCC-----                                                                                 | mirR    | 23  | 461   |
| -----AGTATTACATGGCCAATCT-----                                                                                     | mirR    | 19  | 409   |
| -----TGAGTATTACATGGCCAATC-----                                                                                    | mirR    | 20  | 325   |
| -----AGTATTACATGGCCAATCTCCTT-----                                                                                 | mirR    | 23  | 280   |
| -----AGTATTACATGGCCAATC-----                                                                                      | mirR    | 18  | 120   |
| -----GTATTACATGGCCAATCTC-----                                                                                     | mirR    | 19  | 116   |

```

-----TGAGTATTACATGGCCAAT----- mirR 19 109
-----GAGTATTACATGGCCAATCT----- mirR 20 103
-----GAGTATTACATGGCCAATCTC----- mirR 21 79
-----AGTATTACATGGCCAATCTCCTTT----- mirR 24 51
-----TGAGTATTACATGGCCAATCTCCT----- mirR 24 48
-----TGAGTATTACATGGCCA----- mirR 18 39
-----GTATTACATGGCCAATCT----- mirR 18 30
-----GAGTATTACATGGCCAATCTCC----- mirR 22 29
-----GAGTATTACATGGCCAATC----- mirR 19 27
-----ATGAGTATTACATGGCCAATCT----- mirR 22 17
-----GTATTACATGGCCAATCTCCT----- mirR 21 12
-----GAGTATTACATGGCCAAT----- mirR 18 8
-----GAGTATTACATGGCCAATCTCCT----- mirR 23 6
-----GAGTATTACATGGCCAATCTCCTT----- mirR 24 5
-----TATTACATGGCCAATCTC----- mirR 18 2
-----ATTACATGGCCAATCTCC----- mirR 18 2
-----ATGAGTATTACATGGCCA----- mirR 18 1
-----GTATTACATGGCCAATCTCCTT----- mirR 22 1
-----CTTTCGGCACTAAAATCTTCC----- morR 21 2
-----TTCGGCACTAAAATCTTCC----- morR 19 1
-----CCTTTCGGCACTAAAATC----- morR 18 1
-----CTTTCGGCACTAAAATCTTCTGGGAGA morR 28 1

```

>mmu-mir-135a-2

```

AGATAAATTCACCTCTAGTGCTTTATGGCTTTTTATTCCCTATGTGATCGTAATAAAGTCTCATGTAGGGATGGAAGCCATGAAA species len reads
--ATAAATTCACCTCTAGTGC----- morL 18 3
AGATAAATTCACCTCTAGTG----- morL 19 2
--ATTCACCTCTAGTGCTTTA----- morL 18 1
-GATAAATTCACCTCTAGTG----- morL 18 1
-----TATGGCTTTTTATTCCCTATGTGA----- mirL 23 7165
-----TATGGCTTTTTATTCCCTATGT----- mirL 21 2517
-----TATGGCTTTTTATTCCCTATGTG----- mirL 22 1315
-----TATGGCTTTTTATTCCCTATG----- mirL 20 243
-----ATGGCTTTTTATTCCCTATGT----- mirL 20 138
-----ATGGCTTTTTATTCCCTATGTGA----- mirL 22 68
-----ATGGCTTTTTATTCCCTATGTG----- mirL 21 29
-----TATGGCTTTTTATTCCCTAT----- mirL 19 27
-----TATGGCTTTTTATTCCCTATGTGAT----- mirL 24 18
-----ATGGCTTTTTATTCCCTATG----- mirL 19 17
-----TATGGCTTTTTATTCCCTATGTGATC----- mirL 25 9
-----TTATGGCTTTTTATTCCCTATGTGA----- mirL 24 4
-----TGGCTTTTTATTCCCTATG----- mirL 18 3
-----TGGCTTTTTATTCCCTATGTG----- mirL 20 2
-----ATGGCTTTTTATTCCCTATGTGATC----- mirL 24 1
-----TTATGGCTTTTTATTCCCTATGTG----- mirL 23 1
-----CGTAATAAAGTCTCATGT----- loop 18 3

```

```
-----TGTAGGGATGGAAGCCATGAAA mirR 22 626
-----TGTAGGGATGGAAGCCATGAA- mirR 21 215
-----ATGTAGGGATGGAAGCCATGAA- mirR 22 74
-----TGTAGGGATGGAAGCCATGA-- mirR 20 72
-----TGTAGGGATGGAAGCCATG--- mirR 19 29
-----GTAGGGATGGAAGCCATGAAA mirR 21 26
-----ATGTAGGGATGGAAGCCATGA-- mirR 21 12
-----AGGGATGGAAGCCATGAAA mirR 19 12
-----ATGTAGGGATGGAAGCCATG--- mirR 20 5
-----TCATGTAGGGATGGAAGC----- mirR 18 5
-----ATGTAGGGATGGAAGCCATGAAA mirR 23 4
-----GTAGGGATGGAAGCCATGAA- mirR 20 4
-----TAGGGATGGAAGCCATGAAA mirR 20 3
-----AGGGATGGAAGCCATGAA- mirR 18 3
-----TCATGTAGGGATGGAAGCC----- mirR 19 3
-----GTAGGGATGGAAGCCATGA-- mirR 19 2
-----TAGGGATGGAAGCCATGA-- mirR 18 2
-----ATGTAGGGATGGAAGCCAT--- mirR 19 1
```

>mmu-mir-707

```
CGCTTGCGTGTGAGCATGGGCATGCAGTCATGCCGCTTGCCTACGCTTGTGTGAGCATGGGCATGCCGTCATAGTTGTTGCCGGCAATTCGAAACAGTAGCAAAAGTCTTTTGCCGTATTTTCCATCCGTGGGCACC spe
-GCTTGCGTGTGAGCATGGGCA----- mor
-GCTTGCGTGTGAGCATGGGCAT----- mor
-----GTGAGCATGGGCATGCAG----- mor
CGCTTGCGTGTGAGCATGGGC----- mor
-GCTTGCGTGTGAGCATGGGC----- mor
-----CAGTCATGCCGCTTGCCTACG----- mir
-----CAGTCATGCCGCTTGCCTA----- mir
-----CAGTCATGCCGCTTGCCTAC----- mir
-----AGTCATGCCGCTTGCCTACG----- mir
-----GTCATGCCGCTTGCCTACG----- mir
-----CAGTCATGCCGCTTGCCTACGC----- mir
-----CAGTCATGCCGCTTGCCT----- mir
-----CAGTCATGCCGCTTGCCTACGCTT----- mir
-----AGTCATGCCGCTTGCCTA----- mir
-----GCAGTCATGCCGCTTGCCTACG----- mir
-----CAGTCATGCCGCTTGCCTACGCT----- mir
-----TCATGCCGCTTGCCTACG----- mir
-----AGTCATGCCGCTTGCCTACGC----- mir
-----GTCATGCCGCTTGCCTAC----- mir
-----AGTCATGCCGCTTGCCTAC----- mir
-----TATTTTCCATCCGTGGGC----- mir
-----TTTCCATCCGTGGGCACC mir
-----TTTTCCATCCGTGGGCAC- mir
```

>mmu-mir-1944



|                                                                                                         | species | len | reads |
|---------------------------------------------------------------------------------------------------------|---------|-----|-------|
| TCTCTAGAGTTCTCAGAAGCCACAAATGATGAACCTTTTGACGGGGCGGACAGAACTCTGTGCTGAATGTCAAGTTCTGATTGGCTTTAGGAGGGAGTGTTTG | morL    | 18  | 2     |
| ----AGAGTTCTCAGAAGCCAC-----                                                                             | morL    | 21  | 1     |
| TCTCTAGAGTTCTCAGAAGCC-----                                                                              | morL    | 19  | 1     |
| TCTCTAGAGTTCTCAGAA-----                                                                                 | morL    | 18  | 1     |
| -----CACAAATGATGAACCTTTTGACG-----                                                                       | mirL    | 23  | 1081  |
| -----CACAAATGATGAACCTTTTGACGG-----                                                                      | mirL    | 24  | 550   |
| -----CACAAATGATGAACCTTTTGAC-----                                                                        | mirL    | 22  | 277   |
| -----ACAAATGATGAACCTTTTGACG-----                                                                        | mirL    | 22  | 234   |
| -----CACAAATGATGAACCTTTTGACGGGCGGACA-----                                                               | mirL    | 31  | 214   |
| -----CACAAATGATGAACCTTTTGA-----                                                                         | mirL    | 21  | 190   |
| -----ACAAATGATGAACCTTTTGACGG-----                                                                       | mirL    | 23  | 176   |
| -----CACAAATGATGAACCTTTT-----                                                                           | mirL    | 19  | 131   |
| -----ACAAATGATGAACCTTTT-----                                                                            | mirL    | 18  | 123   |
| -----CACAAATGATGAACCTTTTG-----                                                                          | mirL    | 20  | 120   |
| -----ACAAATGATGAACCTTTTGAC-----                                                                         | mirL    | 21  | 96    |
| -----ACAAATGATGAACCTTTTG-----                                                                           | mirL    | 19  | 74    |
| -----ACAAATGATGAACCTTTTGA-----                                                                          | mirL    | 20  | 64    |
| -----ACAAATGATGAACCTTTTGACGGGCGGACA-----                                                                | mirL    | 30  | 46    |
| -----CCACAAATGATGAACCTTTTGACG-----                                                                      | mirL    | 24  | 32    |
| -----CCACAAATGATGAACCTTTTGACGGGCGGACA-----                                                              | mirL    | 32  | 31    |
| -----CCACAAATGATGAACCTTTTGACGGGCGGAC-----                                                               | mirL    | 31  | 7     |
| -----CAAATGATGAACCTTTTG-----                                                                            | mirL    | 18  | 3     |
| -----CCACAAATGATGAACCTTTTGACGG-----                                                                     | mirL    | 25  | 3     |
| -----CCACAAATGATGAACCTTTTGAC-----                                                                       | mirL    | 23  | 2     |
| -----CCACAAATGATGAACCTTTTGACGGG-----                                                                    | mirL    | 26  | 2     |
| -----AGCCACAAATGATGAACCTTTTGACGGGCGGAC-----                                                             | mirL    | 33  | 2     |
| -----CCACAAATGATGAACCTTTTGACGGGCGG-----                                                                 | mirL    | 29  | 1     |
| -----AAATGATGAACCTTTTGA-----                                                                            | mirL    | 18  | 1     |
| -----AAATGATGAACCTTTTGACGG-----                                                                         | mirL    | 21  | 1     |
| -----CAAATGATGAACCTTTTGACGG-----                                                                        | mirL    | 22  | 1     |
| -----CAAATGATGAACCTTTTGACGGCG-----                                                                      | mirL    | 25  | 1     |
| -----CTCTGTGCTGAATGTCAAGTTCTGATT-----                                                                   | mirR    | 27  | 7802  |
| -----CTCTGTGCTGAATGTCAAGTTCTGAT-----                                                                    | mirR    | 26  | 250   |
| -----CTCTGTGCTGAATGTCAAGTTCTGA-----                                                                     | mirR    | 25  | 180   |
| -----CTCTGTGCTGAATGTCAAGTTCTGATT-----                                                                   | mirR    | 28  | 139   |
| -----CTGTGCTGAATGTCAAGTTCTGATT-----                                                                     | mirR    | 25  | 136   |
| -----TGTGCTGAATGTCAAGTTCTGATT-----                                                                      | mirR    | 24  | 44    |
| -----TCTGTGCTGAATGTCAAGTTCTGATT-----                                                                    | mirR    | 26  | 42    |
| -----CTCTGTGCTGAATGTCAAGTTCTG-----                                                                      | mirR    | 24  | 28    |
| -----CTCTGTGCTGAATGTCAA-----                                                                            | mirR    | 18  | 26    |
| -----CTCTGTGCTGAATGTCAAGTTC-----                                                                        | mirR    | 22  | 19    |
| -----TCTGTGCTGAATGTCAAGTTCTGA-----                                                                      | mirR    | 24  | 18    |
| -----CTGTGCTGAATGTCAAGTTCTGATT-----                                                                     | mirR    | 26  | 11    |
| -----TGTGCTGAATGTCAAGTTC-----                                                                           | mirR    | 19  | 3     |
| -----CTGTGCTGAATGTCAAGTTCTGA-----                                                                       | mirR    | 23  | 3     |

```

-----CTGTGCTGAATGTCAAGTTCTGAT----- mirR 24 2
-----CTGTGCTGAATGTCAAGTTCT----- mirR 21 2
-----TCTGTGCTGAATGTCAAGTTCTGAT----- mirR 25 2
-----TGTGCTGAATGTCAAGTT----- mirR 18 1
-----TCTGTGCTGAATGTCAAGTTCTGATT----- mirR 27 1
-----GCTTTAGGAGGGAGTGTTTG morR 20 2
-----CTTTAGGAGGGAGTGTTTG morR 19 1
-----GGCTTTAGGAGGGAGTGT--- morR 18 1
-----TGGCTTTAGGAGGGAGTG--- morR 18 1
-----TTGGCTTTAGGAGGGAGT---- morR 18 1
-----GCTTTAGGAGGGAGTGTT-- morR 18 1

```

>mmu-mir-224

| Species | len | reads |
|---------|-----|-------|
| morL    | 18  | 1     |
| morL    | 18  | 1     |
| morL    | 18  | 1     |
| mirL    | 22  | 3347  |
| mirL    | 23  | 2996  |
| mirL    | 21  | 1300  |
| mirL    | 24  | 962   |
| mirL    | 25  | 341   |
| mirL    | 21  | 237   |
| mirL    | 21  | 221   |
| mirL    | 20  | 220   |
| mirL    | 19  | 112   |
| mirL    | 22  | 107   |
| mirL    | 20  | 100   |
| mirL    | 23  | 81    |
| mirL    | 19  | 35    |
| mirL    | 24  | 27    |
| mirL    | 20  | 24    |
| mirL    | 20  | 22    |
| mirL    | 19  | 20    |
| mirL    | 23  | 19    |
| mirL    | 25  | 19    |
| mirL    | 24  | 13    |
| mirL    | 18  | 9     |
| mirL    | 18  | 6     |
| mirL    | 19  | 5     |
| mirL    | 26  | 5     |
| mirL    | 18  | 1     |
| mirL    | 22  | 1     |
| mirL    | 22  | 1     |
| mirL    | 18  | 1     |
| mirL    | 18  | 1     |

```

-----TTAAGTCACTAGTGGTTCC----- mirL 19 1
-----AGTAGATGGTTTGTGCATTGT----- loop 21 1
-----AAAATGGTGCCTAGTGACTACA----- mirR 23 1278
-----AATGGTGCCTAGTGACTACA----- mirR 21 106
-----AAATGGTGCCTAGTGACTACA----- mirR 22 96
-----AAAATGGTGCCTAGTGACTAC----- mirR 22 84
-----AAAATGGTGCCTAGTGACTA----- mirR 21 53
-----ATGGTGCCTAGTGACTACA----- mirR 20 44
-----AAAATGGTGCCTAGTGACT----- mirR 20 30
-----AATGGTGCCTAGTGACTACAA----- mirR 22 30
-----CAAAATGGTGCCTAGTGACT----- mirR 21 17
-----AAATGGTGCCTAGTGACTAC----- mirR 21 14
-----AATGGTGCCTAGTGACTAC----- mirR 20 10
-----AATGGTGCCTAGTGACTA----- mirR 19 10
-----AATGGTGCCTAGTGACTACAAA----- mirR 23 10
-----AAAATGGTGCCTAGTGACTACAA----- mirR 24 8
-----CAAAATGGTGCCTAGTGACTACA----- mirR 24 8
-----ATGGTGCCTAGTGACTAC----- mirR 19 7
-----AAATGGTGCCTAGTGACTACAA----- mirR 23 7
-----AAAATGGTGCCTAGTGACTAC----- mirR 19 7
-----AATGGTGCCTAGTGACT----- mirR 18 7
-----AAATGGTGCCTAGTGACT----- mirR 19 6
-----ATGGTGCCTAGTGACTA----- mirR 18 3
-----TTCAAAATGGTGCCTAGTGACTAC----- mirR 25 3
-----AAATGGTGCCTAGTGACTACAAA----- mirR 24 1
-----AAAATGGTGCCTAGTGA----- mirR 18 1
-----ATGGTGCCTAGTGACTACAA----- mirR 21 1
-----CAAAATGGTGCCTAGTG----- mirR 18 1
-----AGCCCCAGAGCCAGCATCATCGGTG----- morR 25 14
-----AGCCCCAGAGCCAGCATCATCGGTGA----- morR 26 8
-----GCCCCAGAGCCAGCATCA----- morR 18 2
-----CAAAGCCCCAGAGCCAGCA----- morR 19 1
-----AGCCCCAGAGCCAGCATC----- morR 18 1

```

>mmu-mir-135a-1

```

GCCCCAGGCTCACTGTTCTCTATGGCTTTTTATTCCCTATGTGATTCTATTGCTCGCTCATATAGGGATTGGAGCCGTGGCGTACGGTGAGGATAAGCCAAC species len reads
GCCCCAGGCTCACTGTT----- morL 18 3
-CCCCAGGCTCACTGTT----- morL 18 2
---AGGCTCACTGTTCTCTAT----- morL 19 1
--CCCAGGCTCACTGTTCT----- morL 18 1
---CCAGGCTCACTGTTCTC----- morL 18 1
-----TATGGCTTTTTATTCCCTATGTGA----- mirL 23 7165
-----TATGGCTTTTTATTCCCTATGT----- mirL 21 2517
-----TATGGCTTTTTATTCCCTATGT----- mirL 22 1315
-----TATGGCTTTTTATTCCCTATG----- mirL 20 243
-----ATGGCTTTTTATTCCCTATGT----- mirL 20 138

```

```

-----ATGGCTTTTTATTCCCTATGTGA----- mirL 22 68
-----ATGGCTTTTTATTCCCTATGTG----- mirL 21 29
-----TATGGCTTTTTATTCCCTAT----- mirL 19 27
-----TATGGCTTTTTATTCCCTATGTGAT----- mirL 24 18
-----ATGGCTTTTTATTCCCTATG----- mirL 19 17
-----TATGGCTTTTTATTCCCTA----- mirL 18 4
-----TGGCTTTTTATTCCCTATG----- mirL 18 3
-----TGGCTTTTTATTCCCTATGTG----- mirL 20 2
-----CTATGGCTTTTTATTCCCTA----- mirL 19 1
-----CTATGGCTTTTTATTCCCTATGTGA----- mirL 24 1
-----TATAGGGATTGGAGCCCGTGGC----- mirR 22 274
-----TATAGGGATTGGAGCCCGTGG----- mirR 20 42
-----AGGGATTGGAGCCCGTGGC----- mirR 18 18
-----TATAGGGATTGGAGCCCGTG----- mirR 19 16
-----ATATAGGGATTGGAGCCCGTGGC----- mirR 22 10
-----TATAGGGATTGGAGCCCGTGGC----- mirR 21 8
-----ATAGGGATTGGAGCCCGTGGCG----- mirR 21 7
-----AGGGATTGGAGCCCGTGGCG----- mirR 19 6
-----TAGGGATTGGAGCCCGTGGCG----- mirR 20 5
-----ATATAGGGATTGGAGCCCGTGG----- mirR 21 2
-----TAGGGATTGGAGCCCGTGGC----- mirR 19 1
-----ATATAGGGATTGGAGCCCGTGGCGT----- mirR 24 1
-----ACGGTGAGGATAAGCCAAC morR 19 1
-----GTACGGTGAGGATAAGCC--- morR 18 1
-----TACGGTGAGGATAAGCCAA- morR 19 1
-----TACGGTGAGGATAAGCCA-- morR 18 1

>mmu-mir-764
ACAATCTGAATCTTGGAGGCAGGTGCTCACATGTCTCCTCCATGCTTATAAATACATGGAGGAGGCCATAGTGGCAACTGTCACCATGATTGATTTGTTGG species len reads
---ATCTGAATCTTGGAGGCA----- morL 18 2
---CTGAATCTTGGAGGCAGG----- morL 18 1
ACAATCTGAATCTTGGAG----- morL 18 1
-----GGTGCTCACATGTCTCCT----- mirL 19 9315
-----GGTGCTCACATGTCTCCT----- mirL 18 687
-----GCAGGTGCTCACATGTCTCCT----- mirL 22 147
-----GTGCTCACATGTCTCCT----- mirL 18 86
-----AGGTGCTCACATGTCTCCT----- mirL 20 55
-----GGTGCTCACATGTCTCCTCCATG----- mirL 24 26
-----GCAGGTGCTCACATGTCC----- mirL 18 18
-----GGTGCTCACATGTCTCCTC----- mirL 20 16
-----GCAGGTGCTCACATGTCTCCT----- mirL 21 16
-----CAGGTGCTCACATGTCTCCT----- mirL 21 10
-----CAGGTGCTCACATGTCTC----- mirL 19 8
-----GCTCACATGTCTCCTCCTCCA----- mirL 19 8
-----GGTGCTCACATGTCTCCTCCTCCA----- mirL 22 6
-----GCAGGTGCTCACATGTCTC----- mirL 19 4

```

```

-----GGTGCTCACATGTCCTCCTCCAT----- mirL 23 3
-----AGGTGCTCACATGTCCTCC----- mirL 19 3
-----GCAGGTGCTCACATGTCCTC----- mirL 20 2
-----GCTCACATGTCCTCCTCC----- mirL 18 1
-----TGCTCACATGTCCTCCTCCA----- mirL 20 1
-----GCAGGTGCTCACATGTCCTCCTC----- mirL 23 1
-----AGGTGCTCACATGTCCTC----- mirL 18 1
-----AGGAGGCCATAGTGGCAACTGT----- mirR 22 1080
-----AGGAGGCCATAGTGGCAACTG----- mirR 21 104
-----GGAGGCCATAGTGGCAACTGT----- mirR 21 61
-----GAGGCCATAGTGGCAACTGT----- mirR 20 55
-----AGGCCATAGTGGCAACTGT----- mirR 19 52
-----AGGAGGCCATAGTGGCAACT----- mirR 20 47
-----GAGGCCATAGTGGCAACTG----- mirR 19 13
-----AGGAGGCCATAGTGGCAAC----- mirR 19 11
-----AGGCCATAGTGGCAACTG----- mirR 18 3
-----GGAGGCCATAGTGGCAACT----- mirR 19 3
-----GAGGAGGCCATAGTGGCAACTGT----- mirR 23 2
-----GGAGGCCATAGTGGCAAC----- mirR 18 2
-----AGGAGGCCATAGTGGCAACTGTACCA----- mirR 27 1
-----GGAGGCCATAGTGGCAACTG----- mirR 20 1
-----AGGAGGCCATAGTGGCAACTGTC----- mirR 23 1
-----TGGAGGAGGCCATAGTGGCAACTGT----- mirR 25 1
-----AGGAGGCCATAGTGGCAACTGTACCATGAT----- mirR 31 1
-----GAGGAGGCCATAGTGGCAACTG----- mirR 22 1
-----GTCACCATGATTGATTTC----- morR 18 2
-----CATGATTGATTTCGTTGG morR 18 1

>mmu-mir-212
CCGCCCGGGCAGCGCGCCGGCACCTTGGCTCTAGACTGCTTACTGCCCGGGCCGCTTCAGTAACAGTCTCCAGTCACGGCCACCGACGCTGGCCCCGCCAG species len reads
CCGCCCGGGCAGCGCGCC----- morL 18 2
---CCCGGGCAGCGCGCCG--- morL 18 1
-CGCCCGGGCAGCGCGCCG----- morL 18 1
-----ACCTTGGCTCTAGACTGCTTACT----- mirL 23 1208
-----ACCTTGGCTCTAGACTGCTTACTGC----- mirL 25 809
-----ACCTTGGCTCTAGACTGCTTACTG----- mirL 24 710
-----ACCTTGGCTCTAGACTGCTTAC----- mirL 22 246
-----ACCTTGGCTCTAGACTGCTTA----- mirL 21 126
-----CCTTGGCTCTAGACTGCTTACTG----- mirL 23 33
-----ACCTTGGCTCTAGACTGCTTACTGCC----- mirL 26 28
-----ACCTTGGCTCTAGACTGCTT----- mirL 20 27
-----CCTTGGCTCTAGACTGCTTACTGC----- mirL 24 20
-----CCTTGGCTCTAGACTGCTTACT----- mirL 22 15
-----CCTTGGCTCTAGACTGCTTA----- mirL 20 6
-----CCTTGGCTCTAGACTGCTTAC----- mirL 21 2
-----CTTGGCTCTAGACTGCTTACTGC----- mirL 23 2

```

```
-----CTTGGCTCTAGACTGCTTAC----- mirL 20 2
-----CTTGGCTCTAGACTGCTTACTG----- mirL 22 1
-----CACCTTGGCTCTAGACTGCTTACTGCC----- mirL 27 1
-----CCTTGGCTCTAGACTGCTT----- mirL 19 1
-----CACCTTGGCTCTAGACTGCTTACT----- mirL 24 1
-----CACCTTGGCTCTAGACTGCTTA----- mirL 22 1
-----GCCCCGGGCCGCTTCAGT----- loop 18 2
-----ACTGCCCGGGCCGCTTCAG----- loop 20 1
-----TAACAGTCTCCAGTCACGGCCAC----- mirR 23 2240
-----TAACAGTCTCCAGTCACGGCCA----- mirR 22 1992
-----TAACAGTCTCCAGTCACGGCCACC----- mirR 24 1219
-----TAACAGTCTCCAGTCACGGCC----- mirR 21 1028
-----TAACAGTCTCCAGTCACGGCCACCG----- mirR 25 715
-----AACAGTCTCCAGTCACGGCCAC----- mirR 22 261
-----TAACAGTCTCCAGTCACGGCC----- mirR 20 189
-----TAACAGTCTCCAGTCACGGCCACCGA----- mirR 26 185
-----AACAGTCTCCAGTCACGGCCA----- mirR 21 152
-----AACAGTCTCCAGTCACGGCCACC----- mirR 23 117
-----GTAACAGTCTCCAGTCACGGCCA----- mirR 23 105
-----AACAGTCTCCAGTCACGGCCACCG----- mirR 24 75
-----GTAACAGTCTCCAGTCACGGCCAC----- mirR 24 64
-----GTAACAGTCTCCAGTCACGGCCACC----- mirR 25 55
-----GTAACAGTCTCCAGTCACGGCC----- mirR 22 31
-----GTAACAGTCTCCAGTCACGGCCACCG----- mirR 26 29
-----AACAGTCTCCAGTCACGGCC----- mirR 20 27
-----ACAGTCTCCAGTCACGGCC----- mirR 19 20
-----AACAGTCTCCAGTCACGGCC----- mirR 19 15
-----ACAGTCTCCAGTCACGGCCA----- mirR 20 12
-----AACAGTCTCCAGTCACGGCCACCGA----- mirR 25 12
-----CAGTCTCCAGTCACGGCC----- mirR 18 11
-----GTAACAGTCTCCAGTCACGGCC----- mirR 21 7
-----GTAACAGTCTCCAGTCACGGCCACCGA----- mirR 27 6
-----ACAGTCTCCAGTCACGGCCAC----- mirR 21 5
-----ACAGTCTCCAGTCACGGCC----- mirR 18 3
-----AGTAACAGTCTCCAGTCA----- mirR 18 2
-----CAGTAACAGTCTCCAGTCACG----- mirR 21 1
-----ACCGACGCTGGCCCCG----- morR 18 1
-----CGCCTGGCCCCGCCCCAG----- morR 18 1
-----ACGCCTGGCCCCGCCCCA----- morR 18 1
-----CACCGACGCTGGCCCCG----- morR 18 1
```

>mmu-mir-488

```
GTGAGAGTGAGAATCCTCTCTCCAGATAATAGCACTCTCAAACAAGTTCCATGTTGTTTGAAGGCTGTTTCTTGGTCAGAAGACTCTCAATTTCTTCTGGAAGACTCAGCAGTCATGTTTTACTATTTCAGACAAACAA
GTGAGAGTGAGAATCCTC-----
-----GTGAGAATCCTCTCTCC-----
-TGAGAGTGAGAATCCTCT-----
```

```

--GAGAGTGAGAATCCTCTC-----
---AGTGAGAATCCTCTCTCCC-----
---GAGTGAGAATCCTCTCTC-----
--GAGAGTGAGAATCCTCTCTCCC-----
---GAGTGAGAATCCTCTCTCC-----
GTGAGAGTGAGAATCCTCT-----
-----CCCAGATAATAGCACTCTCAA-----
-----CCCAGATAATAGCACTCTCA-----
-----CCCAGATAATAGCACTCTC-----
-----CCAGATAATAGCACTCTCAA-----
-----CCCAGATAATAGCACTCT-----
-----CAGATAATAGCACTCTCAA-----
-----CCAGATAATAGCACTCTCA-----
-----AGATAATAGCACTCTCAA-----
-----CCAGATAATAGCACTCTC-----
-----CCCAGATAATAGCACTCTCAA-----
-----CAGATAATAGCACTCTCA-----
-----CCCAGATAATAGCACTCTCAAAC-----
-----TCTCCAGATAATAGCACTC-----
-----CCCAGATAATAGCACTCTCAAACAAG-----
-----ACAAACAA-----
-----CAAACAA-----
-----ACAAACAA-----
-----AAACAA-----
-----AGACAAACAA-----

```

>mmu-mir-410

| CGGTCAACACTGGGTACTTGAGGAGGGTTGTCTGTGATGAGTTCGCTTTATTAATGACGAATATAACACAGATGGCCTGTTTTCAATACCACCTGCCACTCCGGTCACTCG | species | len | reads |
|-----------------------------------------------------------------------------------------------------------------|---------|-----|-------|
| ---CAACACTGGGTACTTGAGGAG-----                                                                                   | morL    | 21  | 541   |
| ----AACACTGGGTACTTGAGGAG-----                                                                                   | morL    | 20  | 191   |
| ---TCAACACTGGGTACTTGAGGAG-----                                                                                  | morL    | 22  | 163   |
| ----ACACTGGGTACTTGAGGAG-----                                                                                    | morL    | 19  | 95    |
| --GTCAACACTGGGTACTTGAGGAG-----                                                                                  | morL    | 23  | 94    |
| CGGTCAACACTGGGTACTTGAGGAG-----                                                                                  | morL    | 25  | 88    |
| --GGTCAACACTGGGTACTTGAGGAG-----                                                                                 | morL    | 24  | 36    |
| ----CAACACTGGGTACTTGAGGAGA-----                                                                                 | morL    | 22  | 19    |
| ----AACACTGGGTACTTGAGGAGA-----                                                                                  | morL    | 21  | 5     |
| ----CAACACTGGGTACTTGAGGA-----                                                                                   | morL    | 20  | 4     |
| ----AACACTGGGTACTTGAGGA-----                                                                                    | morL    | 19  | 3     |
| ----CAACACTGGGTACTTGAGGAGAG-----                                                                                | morL    | 23  | 3     |
| ----TCAACACTGGGTACTTGAGGA-----                                                                                  | morL    | 21  | 3     |
| ----ACACTGGGTACTTGAGGAGA-----                                                                                   | morL    | 20  | 2     |
| ----CAACACTGGGTACTTGAGG-----                                                                                    | morL    | 19  | 2     |
| ---TCAACACTGGGTACTTGAGGAGA-----                                                                                 | morL    | 23  | 2     |
| --GTCAACACTGGGTACTTGAGGA-----                                                                                   | morL    | 22  | 1     |
| ----ACACTGGGTACTTGAGGA-----                                                                                     | morL    | 18  | 1     |

```

CGGTCAACACTGGGTACTTGAGGAGA----- morL 26 1
-GGTCAACACTGGGTACTTGAGGAGA----- morL 25 1
-GGTCAACACTGGGTACTTGAGGA----- morL 23 1
---CAACACTGGGTACTTGAG----- morL 18 1
--GTCAACACTGGGTACTTGAGG----- morL 21 1
-----ACTGGGTACTTGAGGAGAG----- morL 19 1
-----AGGTTGTCTGTGATGAGTTCG----- mirL 21 438
-----AGGTTGTCTGTGATGAGTTCGC----- mirL 22 176
-----GAGGTTGTCTGTGATGAGTTCG----- mirL 22 117
-----AGGTTGTCTGTGATGAGTTCGCT----- mirL 23 36
-----AGGTTGTCTGTGATGAGTT----- mirL 19 25
-----AGGTTGTCTGTGATGAGTTC----- mirL 20 24
-----AGGTTGTCTGTGATGAGTTCGCTT----- mirL 24 11
-----GAGGTTGTCTGTGATGAGTT----- mirL 20 10
-----TTGTCTGTGATGAGTTCG----- mirL 18 7
-----GTTGTCTGTGATGAGTTCG----- mirL 19 7
-----AGGTTGTCTGTGATGAGTTCGCTTT----- mirL 25 6
-----GAGGTTGTCTGTGATGAGT----- mirL 19 4
-----GAGGTTGTCTGTGATGAGTTC----- mirL 21 4
-----GAGGTTGTCTGTGATGAG----- mirL 18 3
-----GGTTGTCTGTGATGAGTTC----- mirL 19 1
-----GAGAGGTTGTCTGTGATG----- mirL 18 1
-----GAGAGGTTGTCTGTGATGA----- mirL 19 1
-----AATATAACACAGATGGCCTGT----- mirR 21 6716
-----AATATAACACAGATGGCCTGTT----- mirR 22 999
-----AATATAACACAGATGGCCTGTTT----- mirR 23 870
-----AATATAACACAGATGGCCTG----- mirR 20 546
-----AATATAACACAGATGGCCT----- mirR 19 116
-----AATATAACACAGATGGCC----- mirR 18 91
-----AATATAACACAGATGGCCTGTTTT----- mirR 24 37
-----ATATAACACAGATGGCCTGT----- mirR 20 35
-----ATATAACACAGATGGCCTGTTT----- mirR 22 16
-----ATATAACACAGATGGCCTGTT----- mirR 21 13
-----ATATAACACAGATGGCCT----- mirR 18 9
-----ATAACACAGATGGCCTGT----- mirR 18 9
-----TATAACACAGATGGCCTGTT----- mirR 20 7
-----ATATAACACAGATGGCCTG----- mirR 19 6
-----TATAACACAGATGGCCTGTTT----- mirR 21 5
-----ATAACACAGATGGCCTGTT----- mirR 19 4
-----GAATATAACACAGATGGCCTGTTT----- mirR 24 3
-----TATAACACAGATGGCCTGT----- mirR 19 2
-----GAATATAACACAGATGGCC----- mirR 19 2
-----CGAATATAACACAGATGGCCTGT----- mirR 23 2
-----ATAACACAGATGGCCTGTTT----- mirR 20 1
-----CGAATATAACACAGATGGCCT----- mirR 21 1
-----ATATAACACAGATGGCCTGTTTT----- mirR 23 1

```



C:\Documents and Settings\hong\Desktop\Reprogramming-total RNA.txt

```
-----ACGAATATAACACAGATG----- mirR 18 1
-----TCAATACCACCTGCCACT----- morR 18 1
-----TTTCAATACCACCTGCCACT----- morR 21 1
-----TTTCAATACCACCTGCCACTCCGGTCACTCG morR 31 1
```

>mmu-mir-344d-2

```
ATTTGTCTGCCAGGGAAGATTTTCATTAGTCTGGTTGCTGGCTATATTCCAGGACTTATCTGGTCTGGATATAACCACTGCCAGACTGAATGGTCTAAAGAGAAGGGAG species len reads
ATTTGTCTGCCAGGGAAG----- morL 18 6
--TTGTCTGCCAGGGAAGATT----- morL 19 1
-----ATTTTCATTAGTCTGGTTG----- mirL 18 2210
-----ATTTTCATTAGTCTGGTTGC----- mirL 19 44
-----TTTCATTAGTCTGGTTGC----- mirL 18 13
-----AAGATTTTCATTAGTCTGG----- mirL 18 1
-----TTTCATTAGTCTGGTTGCT----- mirL 19 1
-----GATATAACCACTGCCAGACTGA----- mirR 22 7497
-----GATATAACCACTGCCAGACTGAA----- mirR 23 1045
-----GATATAACCACTGCCAGACT----- mirR 20 212
-----GATATAACCACTGCCAGACTG----- mirR 21 166
-----GATATAACCACTGCCAGAC----- mirR 19 76
-----ATAACCACTGCCAGACTGA----- mirR 19 75
-----GATATAACCACTGCCAGACTGAAT----- mirR 24 59
-----ATAACCACTGCCAGACTGAA----- mirR 20 50
-----GGATATAACCACTGCCAGACTGA----- mirR 23 35
-----GATATAACCACTGCCAGA----- mirR 18 13
-----ATATAACCACTGCCAGAC----- mirR 18 9
-----ATATAACCACTGCCAGACTGA----- mirR 21 7
-----ATAACCACTGCCAGACTG----- mirR 18 4
-----ATATAACCACTGCCAGACTGAA----- mirR 22 4
-----ATATAACCACTGCCAGACTGAAT----- mirR 23 2
-----TGGATATAACCACTGCCAGAC----- mirR 21 2
-----CTGGATATAACCACTGCCAGA----- mirR 21 1
-----ATAACCACTGCCAGACTGAAT----- mirR 21 1
-----TGGATATAACCACTGCCA----- mirR 18 1
-----GGATATAACCACTGCCAGACTG----- mirR 22 1
-----AATGGTGCTAAAGAGAAG----- morR 18 3
-----GGTGCTAAAGAGAAGGGA----- morR 18 2
-----ATGGTGCTAAAGAGAAGGGA----- morR 20 1
-----GTGCTAAAGAGAAGGGAG----- morR 18 1
-----AATGGTGCTAAAGAGAAGGGA----- morR 21 1
```

>mmu-mir-1-2

```
CGCAGGAGTGCCCTACTCAGAGCACATACTTCTTTATGTACCCATATGAACATTCAGTGCTATGGAATGTAAAGAAGTATGTATTTGGGTAGGTAATGTC species len reads
CGCAGGAGTGCCCTACTCAG----- morL 19 1
---AGGAGTGCCCTACTCAGAG----- morL 18 1
-----GCACATACTTCTTTATGTACCC----- mirL 22 8949
-----GCACATACTTCTTTATGTACC----- mirL 21 1270
```

```

-----CATACTTCTTTATGTACCC----- mirL 19 90
-----GCACATACTTCTTTATGTAC----- mirL 20 36
-----CATACTTCTTTATGTACC----- mirL 18 34
-----CACATACTTCTTTATGTACCC----- mirL 21 26
-----GCACATACTTCTTTATGTAT----- mirL 19 21
-----GCACATACTTCTTTATGT----- mirL 18 19
-----GCACATACTTCTTTATGTACCCA----- mirL 23 17
-----ACATACTTCTTTATGTACCC----- mirL 20 15
-----CACATACTTCTTTATGTACC----- mirL 20 9
-----ACATACTTCTTTATGTACC----- mirL 19 3
-----AGCACATACTTCTTTATG----- mirL 18 2
-----GAGCACATACTTCTTTATGTACCC----- mirL 24 2
-----AGAGCACATACTTCTTTA----- mirL 18 1
-----AGCACATACTTCTTTATGTACCC----- mirL 23 1
-----AGCACATACTTCTTTATGTACC----- mirL 22 1
-----ACATACTTCTTTATGTACCCAT----- mirL 22 1
-----ACATACTTCTTTATGTACCCA----- mirL 21 1
-----GCACATACTTCTTTATGTACCCAT----- mirL 24 1
-----CCCATATGAACATTCAGTGC----- loop 20 3
-----TGAACATTCAGTGCATGG----- loop 19 2
-----TATGAACATTCAGTGCATGG----- loop 21 1
-----CCATATGAACATTCAGTGC----- loop 19 1
-----TGGAATGTAAGAAGTATGTAT----- mirR 22 493
-----TGGAATGTAAGAAGTATG----- mirR 19 139
-----TGGAATGTAAGAAGTATGT----- mirR 20 132
-----TGGAATGTAAGAAGTAT----- mirR 18 51
-----TGGAATGTAAGAAGTATGTA----- mirR 21 46
-----GGAATGTAAGAAGTATGTAT----- mirR 21 24
-----TGGAATGTAAGAAGTATGTATT----- mirR 23 18
-----AATGTAAGAAGTATGTAT----- mirR 19 10
-----GAATGTAAGAAGTATGTATTT----- mirR 22 8
-----GGAATGTAAGAAGTATGTA----- mirR 20 6
-----TGGAATGTAAGAAGTATGTATTT----- mirR 24 2
-----GGAATGTAAGAAGTATGT----- mirR 19 2
-----GGAATGTAAGAAGTATGTATT----- mirR 22 1
-----GGAATGTAAGAAGTATG----- mirR 18 1
-----TTTTGGGTAGGTAATGTC morR 18 1

>mmu-mir-341
TTAAAATGATGATGTCAGTTGGCCGGTCGGCCGATCGCTCGGTCTGTGTCAGTCAGTCGGTCGGTCGATCGGTTCGGTTCCTGTCTTCGAA species len reads
-TAAAATGATGATGTCAGTT----- morL 19 13
TTAAAATGATGATGTCAGTT----- morL 20 9
--AAAATGATGATGTCAGTT----- morL 18 3
---AATGATGATGTCAGTTGGC----- morL 19 3
----TGATGATGTCAGTTGGCC----- morL 18 2
----ATGATGATGTCAGTTGGC----- morL 18 2

```

```

---AAATGATGATGTCAGTTGGC----- morL 20 2
---AATGATGATGTCAGTTGG----- morL 18 1
-----ATGATGTCAGTTGGCCGG----- morL 18 1
---AATGATGATGTCAGTTGGCC----- morL 20 1
-----CGGTCGGCCGATCGCTCGGTC----- mirL 21 12
-----GTCGGCCGATCGCTCGGT----- mirL 18 3
-----CGGTCGGCCGATCGCTCGGTCT----- mirL 22 2
-----TCGGCCGATCGCTCGGTCTGTGTC----- mirL 22 1
-----GGTCGGCCGATCGCTCGGTCTGTGTCAGT----- mirL 27 1
-----CGGTCGGCCGATCGCTCGG----- mirL 19 1
-----GGTCGGCCGATCGCTCGGTCTGTGTC----- mirL 24 1
-----CGGTCGGCCGATCGCTCGGTCTGT----- mirL 24 1
-----TCTGTGTCAGTCAGTCGGTC----- loop 18 2
-----GTCAGTCAGTCGGTCGGTC----- loop 19 2
-----TGTCAGTCAGTCGGTCGGT----- loop 19 1
-----TCGATCGGTCGGTCGGTCAGT----- mirR 21 7476
-----GTCGATCGGTCGGTCGGTCAGT----- mirR 22 1047
-----TCGATCGGTCGGTCGGTCAGTC----- mirR 22 635
-----TCGATCGGTCGGTCGGTCAG----- mirR 20 603
-----TCGATCGGTCGGTCGGTCAGTCG----- mirR 23 421
-----CGATCGGTCGGTCGGTCAGT----- mirR 20 169
-----TCGATCGGTCGGTCGGTCA----- mirR 19 166
-----CGGTCGATCGGTCGGTCGGTCA----- mirR 22 124
-----CGGTCGATCGGTCGGTCGGTC----- mirR 21 105
-----GTCGATCGGTCGGTCGGTCAGTC----- mirR 23 93
-----CGGTCGATCGGTCGGTCGGT----- mirR 20 66
-----GTCGATCGGTCGGTCGGTCAG----- mirR 21 65
-----GTCGATCGGTCGGTCGGTCAGTCG----- mirR 24 55
-----TCGATCGGTCGGTCGGTCAGTCGG----- mirR 24 46
-----CGATCGGTCGGTCGGTCAG----- mirR 19 28
-----GTCGATCGGTCGGTCGGTCA----- mirR 20 26
-----ATCGGTCGGTCGGTCAGT----- mirR 18 21
-----CGATCGGTCGGTCGGTCAGTC----- mirR 21 19
-----TCGATCGGTCGGTCGGTC----- mirR 18 15
-----GATCGGTCGGTCGGTCAGT----- mirR 19 13
-----CGATCGGTCGGTCGGTCAGTCG----- mirR 22 12
-----CGATCGGTCGGTCGGTCA----- mirR 18 9
-----CGGTCGATCGGTCGGTCGG----- mirR 19 8
-----CGGTCGATCGGTCGGTCG----- mirR 18 3
-----CGGTCGATCGGTCGGTCGGTCAG----- mirR 23 2
-----CGGTCGATCGGTCGGTCGGTCAGT----- mirR 24 2
-----CGATCGGTCGGTCGGTCAGTCGG----- mirR 23 1
-----GGTCGATCGGTCGGTCGGTCA----- mirR 21 1
-----GTCGATCGGTCGGTCGGTC----- mirR 19 1
-----GGTCGATCGGTCGGTCGGTC----- mirR 20 1
-----GTCGATCGGTCGGTCGGT----- mirR 18 1

```

```

-----GGTCGATCGGTCCGGTCGG----- mirR 18 1
-----CGGCTTCCTGTCTTCGAA morR 18 3
-----GTCGGCTTCCTGTCTTCGA- morR 19 1

>mmu-mir-671
TGGCTGGCGAACTGGCAGGCCAGGAAGAGGAGGAAGCCCTGGAGGGGCTGGAGGTGATGGATGTTTTCTCCTCCGGTTCTCAGGGCTCCACCTCTTTCGAGCCGTAGAGCCAGGGCTGGTGC species len reads
-----CAGGCCAGGAAGAGGAGG----- morL 18 2
-----GCAGGCCAGGAAGAGGAG----- morL 18 2
-----ACTGGCAGGCCAGGAAGAGG----- morL 20 1
TGGCTGGCGAACTGGCAGGCCAGGAAGAGGA----- morL 31 1
-----TGGCAGGCCAGGAAGAGG----- morL 18 1
-----CTGGCAGGCCAGGAAGAGG----- morL 19 1
-----AGGAAGCCCTGGAGGGGCTGGAGGT----- mirL 25 3120
-----AGGAAGCCCTGGAGGGGCTGGAGG----- mirL 24 1555
-----AGGAAGCCCTGGAGGGGCTGGAGGTG----- mirL 26 830
-----AGGAAGCCCTGGAGGGGCTGGAGGTGA----- mirL 27 511
-----AGGAAGCCCTGGAGGGGCTGGAG----- mirL 23 354
-----AGGAAGCCCTGGAGGGGCTGGAGGTGAT----- mirL 28 209
-----AGGAAGCCCTGGAGGGGCTGGA----- mirL 22 138
-----GGAGGAAGCCCTGGAGGG----- mirL 18 19
-----AAGCCCTGGAGGGGCTGGAGGT----- mirL 22 3
-----AGGAGGAAGCCCTGGAGG----- mirL 18 2
-----GGAAGCCCTGGAGGGGCTGGAGGT----- mirL 24 2
-----AAGCCCTGGAGGGGCTGGAGG----- mirL 21 1
-----GAAGCCCTGGAGGGGCTGG----- mirL 19 1
-----GAGGAAGCCCTGGAGGGGCTGG----- mirL 22 1
-----GGAAGCCCTGGAGGGGCTGGAGG----- mirL 23 1
-----GAGGAAGCCCTGGAGGGGCTGGA----- mirL 23 1
-----GAAGCCCTGGAGGGGCTGGAG----- mirL 21 1
-----AAGCCCTGGAGGGGCTGGAGGTGA----- mirL 24 1
-----TCCGGTTCTCAGGGCTCCACC----- mirR 21 1632
-----TCCGGTTCTCAGGGCTCCACCT----- mirR 22 1361
-----TCCGGTTCTCAGGGCTCCACCTC----- mirR 23 460
-----TCCGGTTCTCAGGGCTCCAC----- mirR 20 348
-----CTCCGGTTCTCAGGGCTCCACC----- mirR 22 146
-----TCCGGTTCTCAGGGCTCCA----- mirR 19 105
-----TCCGGTTCTCAGGGCTCCACCTCT----- mirR 24 97
-----TCCGGTTCTCAGGGCTCCACCTCTT----- mirR 25 54
-----CTCCGGTTCTCAGGGCTCCACCT----- mirR 23 32
-----CTCCGGTTCTCAGGGCTCCAC----- mirR 21 31
-----CCTCCGGTTCTCAGGGCTCCAC----- mirR 22 20
-----CCGGTTCTCAGGGCTCCACCTCT----- mirR 23 16
-----TCCTCCGGTTCTCAGGGCTCCA----- mirR 22 13
-----CCGGTTCTCAGGGCTCCACCT----- mirR 21 12
-----CCGGTTCTCAGGGCTCCACC----- mirR 20 10
-----CTCCGGTTCTCAGGGCTCCA----- mirR 20 8

```

```

-----TCCTCCGGTTCTCAGGGCTCCACCT----- mirR 25 8
-----CCGTTTCTCAGGGCTCCACCTC----- mirR 22 4
-----CCGTTTCTCAGGGCTCCACCTCTT----- mirR 24 4
-----CTCCGGTTCTCAGGGCTCCACCTC----- mirR 24 4
-----CGTTTCTCAGGGCTCCACCT----- mirR 20 3
-----GGTTTCTCAGGGCTCCACC----- mirR 18 2
-----CCGTTTCTCAGGGCTCCA----- mirR 18 2
-----CCGTTTCTCAGGGCTCCAC----- mirR 19 2
-----TCCTCCGGTTCTCAGGGCTCC----- mirR 21 1
-----CTCCGGTTTCTCAGGGCTCCACCTCT----- mirR 25 1
-----CCTCCGGTTTCTCAGGGCT----- mirR 18 1
-----TCTTTCGAGCCGTAGAGCCAGGGCTGGTGC morR 30 1

```

>mmu-mir-675

| Species | len | reads |
|---------|-----|-------|
| morL    | 19  | 1     |
| morL    | 20  | 1     |
| morL    | 18  | 1     |
| morL    | 21  | 1     |
| morL    | 18  | 1     |
| mirL    | 22  | 2933  |
| mirL    | 23  | 1150  |
| mirL    | 21  | 505   |
| mirL    | 20  | 173   |
| mirL    | 24  | 134   |
| mirL    | 21  | 96    |
| mirL    | 20  | 48    |
| mirL    | 20  | 40    |
| mirL    | 19  | 36    |
| mirL    | 21  | 32    |
| mirL    | 19  | 17    |
| mirL    | 20  | 14    |
| mirL    | 18  | 13    |
| mirL    | 22  | 11    |
| mirL    | 19  | 8     |
| mirL    | 18  | 7     |
| mirL    | 19  | 5     |
| mirL    | 19  | 4     |
| mirL    | 18  | 4     |
| mirL    | 18  | 3     |
| mirL    | 18  | 2     |
| mirL    | 18  | 2     |
| mirL    | 24  | 1     |
| mirL    | 23  | 1     |
| mirL    | 19  | 1     |
| mirR    | 20  | 2525  |

```
-----CTGTATGCCCTAACCGCTCAGT----- mirR 22 1679
-----TGTATGCCCTAACCGCTCAGT----- mirR 21 483
-----CTGTATGCCCTAACCGCTC----- mirR 19 258
-----CTGTATGCCCTAACCGCT----- mirR 18 178
-----CTGTATGCCCTAACCGCTCAG----- mirR 21 173
-----GTATGCCCTAACCGCTCAGT----- mirR 20 167
-----CTGTATGCCCTAACCGCTCAGTC----- mirR 23 78
-----TATGCCCTAACCGCTCAGT----- mirR 19 69
-----TGTATGCCCTAACCGCTCAGTC----- mirR 22 57
-----TGTATGCCCTAACCGCTCA----- mirR 19 46
-----GTATGCCCTAACCGCTCA----- mirR 18 32
-----TGTATGCCCTAACCGCTCAGTCC----- mirR 23 27
-----TGTATGCCCTAACCGCTCAG----- mirR 20 22
-----GTATGCCCTAACCGCTCAG----- mirR 19 18
-----CTGTATGCCCTAACCGCTCAGTCC----- mirR 24 10
-----TGTATGCCCTAACCGCTC----- mirR 18 9
-----GTATGCCCTAACCGCTCAGTC----- mirR 21 4
-----TATGCCCTAACCGCTCAG----- mirR 18 4
-----ACTGTATGCCCTAACCGCTCA----- mirR 21 2
-----GTATGCCCTAACCGCTCAGTCC----- mirR 22 2
-----TATGCCCTAACCGCTCAGTCC----- mirR 21 1
-----GTCCCTGGGTCTGGCATG----- morR 18 2
-----AGTCCCTGGGTCTGGCAT----- morR 18 1
-----CCTGGGTCTGGCATGACA----- morR 18 1
-----CCCTGGGTCTGGCATGACAG----- morR 20 1

>mmu-mir-3473
GGACCTTCAGAAGAGCAGTCGGGTGCTCTTACCTGTTGAGCCATCTCACCAGCCAGAAAATATTTTAAAAAGTGAATTGTCTTAAGCTGGAGAGATGGCTCAGCAGTTAAGAGCACTGACTGCTCTTCCAGAGGTCCTG
-----AGTCGGGTGCTCTTACCT-----
-----GTCGGGTGCTCTTACCTGTTG-----
-GACCTTCAGAAGAGCAGTCGGGTGCTCTTACC-----
-----CAGTCGGGTGCTCTTACCTGT-----
-----AGCAGTCGGGTGCTCTTACC-----
-----AGAGCAGTCGGGTGCTCTTACCTGTT-----
GGACCTTCAGAAGAGCAGTCGGGTGCTCTTACC-----
-----TTCAGAAGAGCAGTCGGGTGCTCTTACCTGT-----
-----CAGTCGGGTGCTCTTACCTGTT-----
-----CAGAAGAGCAGTCGGGTGCTCTTACC-----
-----CCTTCAGAAGAGCAGTCGGGTGCTCTTACCTGT-----
-----AGCAGTCGGGTGCTCTTACCTGTT-----
-----CAGAAGAGCAGTCGGGTGCTCTTACCTG-----
-----GAGCAGTCGGGTGCTCTTACCTGTTG-----
-----CCTTCAGAAGAGCAGTCGGGTGCTCTTACC-----
-----TCGGGTGCTCTTACCTGT-----
-----AGTCGGGTGCTCTTACCTG-----
--ACCTTCAGAAGAGCAGTCGGGTGCTCTTACCTGTT-----
```

-----CGGGTGTCTTTACCTGTTG-----  
-----AGCAGTCGGGTGTCTTTACCTG-----  
-----AGTCGGGTGTCTTTACCTGTTGA-----  
-----AGTCGGGTGTCTTTACCTGT-----  
-----CAGTCGGGTGTCTTTACCT-----  
-----TTCAGAAGAGCAGTCGGGTGTCTTTACC-----  
-----CGGGTGTCTTTACCTGTT-----  
-----TTCAGAAGAGCAGTCGGGTGTCTTTACCT-----  
-----TGAGCCATCTCACCAGCCCAG-----  
-----TGAGCCATCTCACCAGCCCAGA-----  
-----TGAGCCATCTCACCAGCCCAGAA-----  
-----TGAGCCATCTCACCAGCCC-----  
-----AGCCATCTCACCAGCCCAGAAA-----  
-----TGAGCCATCTCACCAGCCC-----  
-----TGAGCCATCTCACCAGCCC-----  
-----AGCCATCTCACCAGCCCAGAA-----  
-----GAGCCATCTCACCAGCCCAG-----  
-----GAGCCATCTCACCAGCCCAGA-----  
-----TGAGCCATCTCACCAGCCCAGAAA-----  
-----GAGCCATCTCACCAGCCC-----  
-----GCCATCTCACCAGCCCAG-----  
-----GAGCCATCTCACCAGCCC-----  
-----AGCCATCTCACCAGCCCAG-----  
-----GAGCCATCTCACCAGCCCAGAAA-----  
-----TGTTGAGCCATCTCACCAGCCC-----  
-----AGCCATCTCACCAGCCC-----  
-----GCCATCTCACCAGCCCAG-----  
-----AGCCATCTCACCAGCCCAG-----  
-----AGCCATCTCACCAGCCCAGAAA-----  
-----GAGCCATCTCACCAGCCCAGAAAAT-----  
-----TTGAGCCATCTCACCAGCCCAG-----  
-----AGCCATCTCACCAGCCCAGAAAAT-----  
-----TTGAGCCATCTCACCAGCCCAG-----  
-----TTGAGCCATCTCACCAGCCC-----  
-----GAGCCATCTCACCAGCCCAGAAA-----  
-----GCCATCTCACCAGCCCAGAA-----  
-----GTTGAGCCATCTCACCAGCCCAG-----  
-----TTGAGCCATCTCACCAGCCC-----  
-----GCCATCTCACCAGCCCAGAAA-----  
-----TGTTGAGCCATCTCACCAGCCC-----  
-----TGTTGAGCCATCTCACCAG-----  
-----TGTTGAGCCATCTCACC-----  
-----GTTGAGCCATCTCACCAGCCC-----  
-----GTTGAGCCATCTCACCAGCCC-----  
-----ACTGCTCTTCCAGAGGTCCTG-----  
-----ACTGCTCTTCCAGAGGTCCTG-----

-----TGACTGCTCTTCCAGAGGTCCTG  
-----CTGACTGCTCTTCCAGAGGTCCTG  
-----ACTGCTCTTCCAGAGGTCCTG  
-----CTGCTCTTCCAGAGGTCCTG  
-----TGACTGCTCTTCCAGAGGTCCTG  
-----TGACTGCTCTTCCAGAGGTCCTG  
-----CTGCTCTTCCAGAGGTCCTG  
-----ACTGCTCTTCCAGAGGTCCTG  
-----ACTGCTCTTCCAGAGGTCCTG  
-----TGCTCTTCCAGAGGTCCTG  
-----CTGACTGCTCTTCCAGAGGTCCTG  
-----CTGACTGCTCTTCCAGAGGTCCTG  
-----CTGACTGCTCTTCCAGAGGTCCTG  
-----ACTGCTCTTCCAGAGGTCCTG  
-----GACTGCTCTTCCAGAGGTCCTG  
-----ACTGCTCTTCCAGAGGTCCTG  
-----CTGACTGCTCTTCCAGAGGTCCTG  
-----CTGACTGCTCTTCCAGAGGTCCTG  
-----TGACTGCTCTTCCAGAGGTCCTG  
-----CTGCTCTTCCAGAGGTCCTG  
-----TGACTGCTCTTCCAGAGGTCCTG  
-----CTGACTGCTCTTCCAGAGGTCCTG  
-----GACTGCTCTTCCAGAGGTCCTG  
-----CTGCTCTTCCAGAGGTCCTG  
-----GACTGCTCTTCCAGAGGTCCTG  
-----TGACTGCTCTTCCAGAGGTCCTG  
-----GCTCTTCCAGAGGTCCTG  
-----TGCTCTTCCAGAGGTCCTG  
-----GACTGCTCTTCCAGAGGTCCTG  
-----TGCTCTTCCAGAGGTCCTG  
-----CTGCTCTTCCAGAGGTCCTG  
-----GACTGCTCTTCCAGAGGTCCTG  
-----CTGCTCTTCCAGAGGTCCTG  
-----TGCTCTTCCAGAGGTCCTG  
-----GCTCTTCCAGAGGTCCTG  
-----GCTCTTCCAGAGGTCCTG  
-----TGCTCTTCCAGAGGTCCTG  
-----GCTCTTCCAGAGGTCCTG  
-----TGCTCTTCCAGAGGTCCTG  
-----GCTCTTCCAGAGGTCCTG



>mmu-mir-497

|                                                                                                       | species | len | reads |
|-------------------------------------------------------------------------------------------------------|---------|-----|-------|
| ACCCAGTCCTGCCCCGCCCCAGCAGCACACTGTGGTTTGTACGGCACTGTGGCCACGTCCAAACCACACTGTGGTGTAGAGCGAGGGTATGGGAGGCACCG | morL    | 18  | 3     |
| ---CCAGTCCTGCCCCGCCC-----                                                                             | morL    | 18  | 2     |
| ---CAGTCCTGCCCCGCCCC-----                                                                             | morL    | 18  | 2     |
| ACCCAGTCCTGCCCCG-----                                                                                 | morL    | 19  | 1     |
| ---CCAGTCCTGCCCCGCCC-----                                                                             | morL    | 20  | 1     |
| ---CAGTCCTGCCCCGCCCCAG-----                                                                           | mirL    | 22  | 3984  |
| -----CAGCAGCACACTGTGGTTTGTAC-----                                                                     | mirL    | 21  | 3980  |
| -----CAGCAGCACACTGTGGTTTGT-----                                                                       | mirL    | 23  | 1456  |
| -----CAGCAGCACACTGTGGTTTGTAC-----                                                                     | mirL    | 20  | 475   |
| -----CAGCAGCACACTGTGGTTTGT-----                                                                       | mirL    | 24  | 97    |
| -----CAGCAGCACACTGTGGTTTGT-----                                                                       | mirL    | 19  | 81    |
| -----AGCAGCACACTGTGGTTTGTAC-----                                                                      | mirL    | 22  | 60    |
| -----CAGCAGCACACTGTGGTTTGT-----                                                                       | mirL    | 18  | 45    |
| -----AGCAGCACACTGTGGTTTGT-----                                                                        | mirL    | 19  | 29    |
| -----GCAGCACACTGTGGTTTGT-----                                                                         | mirL    | 19  | 25    |
| -----AGCAGCACACTGTGGTTTGT-----                                                                        | mirL    | 21  | 25    |
| -----GCAGCACACTGTGGTTTGT-----                                                                         | mirL    | 20  | 22    |
| -----AGCAGCACACTGTGGTTTGTAC-----                                                                      | mirL    | 23  | 17    |
| -----GCAGCACACTGTGGTTTGT-----                                                                         | mirL    | 18  | 15    |
| -----AGCAGCACACTGTGGTTTGT-----                                                                        | mirL    | 20  | 15    |
| -----CCAGCAGCACACTGTGGTTTGT-----                                                                      | mirL    | 18  | 10    |
| -----CAGCACACTGTGGTTTGT-----                                                                          | mirL    | 19  | 8     |
| -----CCAGCAGCACACTGTGGTTTGT-----                                                                      | mirL    | 22  | 6     |
| -----AGCAGCACACTGTGGTTTGT-----                                                                        | mirL    | 18  | 4     |
| -----AGCAGCACACTGTGGTTTGTACGG-----                                                                    | mirL    | 24  | 3     |
| -----CAGCACACTGTGGTTTGT-----                                                                          | mirL    | 18  | 3     |
| -----CCAGCAGCACACTGTGGTTTGT-----                                                                      | mirL    | 20  | 2     |
| -----CCAGCAGCACACTGTGGTTTGTAC-----                                                                    | mirL    | 24  | 2     |
| -----CCCAGCAGCACACTGTGGTTTGT-----                                                                     | mirL    | 18  | 2     |
| -----CCCAGCAGCACACTGTGGTTTGT-----                                                                     | mirL    | 23  | 1     |
| -----CCAGCAGCACACTGTGGTTTGT-----                                                                      | mirL    | 19  | 1     |
| -----CAGCACACTGTGGTTTGTAC-----                                                                        | mirL    | 20  | 1     |
| -----CGGCACTGTGGCCACGTCC-----                                                                         | loop    | 19  | 2     |
| -----CGGCACTGTGGCCACGTCC-----                                                                         | loop    | 18  | 2     |
| -----CAAACCACACTGTGGTGTAG-----                                                                        | mirR    | 22  | 225   |
| -----CAAACCACACTGTGGTGTAG-----                                                                        | mirR    | 22  | 100   |
| -----CAAACCACACTGTGGTGTAG-----                                                                        | mirR    | 23  | 84    |
| -----CAAACCACACTGTGGTGTAG-----                                                                        | mirR    | 21  | 33    |
| -----TCCAAACCACACTGTGGTGTAG-----                                                                      | mirR    | 23  | 33    |

```

-----TCCAAACCACACTGTGGT----- mirR 18 8
-----CAAACCACACTGTGGTGTAGAG----- mirR 23 7
-----CCAAACCACACTGTGGTGTTA----- mirR 21 4
-----TCCAAACCACACTGTGGTGTAGAG----- mirR 24 3
-----AAACCACACTGTGGTGTAGAG----- mirR 21 2
-----CAAACCACACTGTGGTGT----- mirR 18 2
-----CCAAACCACACTGTGGTG----- mirR 18 2
-----TCCAAACCACACTGTGGTGTTA----- mirR 22 2
-----CAAACCACACTGTGGTGTAGAGC----- mirR 24 1
-----TCCAAACCACACTGTGGTGT----- mirR 21 1
-----CCAAACCACACTGTGGTGT----- mirR 20 1
-----CCAAACCACACTGTGGTGT----- mirR 19 1
-----CAAACCACACTGTGGTGTTA----- mirR 20 1
-----CCAAACCACACTGTGGTGTAGAGC----- mirR 25 1
-----GTCCAAACCACACTGTGGT----- mirR 19 1
-----AGAGCGAGGGTATGGGAG----- morR 18 3
-----GAGGGTATGGGAGGCACC----- morR 18 2
-----AGGGTATGGGAGGCACCG----- morR 18 1

>mmu-mir-381
ATGCTATTGTTTGGTACTTAAAGCGAGGTTGCCCTTTGTATATTGCGTTTATTGACATGGAATATACAAGGGCAAGCTCTCTGTGAGTATCAAACCTTATCTTGGATCCCC species len reads
--GCTATTGTTTGGTACTTAA----- morL 19 3
ATGCTATTGTTTGGTACT----- morL 18 1
-----AGCGAGGTTGCCCTTTGTATATT----- mirL 23 139
-----AGCGAGGTTGCCCTTTGTATAT----- mirL 22 68
-----AGCGAGGTTGCCCTTTGTATATTC----- mirL 24 34
-----CGAGGTTGCCCTTTGTATATTCG----- mirL 23 8
-----GCGAGGTTGCCCTTTGTATATT----- mirL 22 6
-----GAGGTTGCCCTTTGTATATTC----- mirL 21 6
-----AGCGAGGTTGCCCTTTGTAT----- mirL 20 5
-----TAAAGCGAGGTTGCCCTTTGTAT----- mirL 22 4
-----AGCGAGGTTGCCCTTTGTATA----- mirL 21 4
-----CGAGGTTGCCCTTTGTATATTC----- mirL 22 4
-----GAGGTTGCCCTTTGTATATT----- mirL 20 1
-----CGAGGTTGCCCTTTGTATATTCGG----- mirL 24 1
-----AGCGAGGTTGCCCTTTGT----- mirL 18 1
-----AGCGAGGTTGCCCTTTGTAT----- mirL 19 1
-----GAGGTTGCCCTTTGTATA----- mirL 18 1
-----GCGAGGTTGCCCTTTGTAT----- mirL 18 1
-----AAGCGAGGTTGCCCTTTG----- mirL 18 1
-----CGTTTATTGACATGGAA----- loop 18 17
-----CGTTTATTGACATGGAAT----- loop 19 2
-----GGTTTATTGACATGGAAT----- loop 18 1
-----TATACAAGGGCAAGCTCTCTGT----- mirR 22 7840
-----ATACAAGGGCAAGCTCTCTGT----- mirR 21 732
-----TATACAAGGGCAAGCTCTC----- mirR 19 592

```

```

-----TATACAAGGGCAAGCTCTCTG----- mirR 21 452
-----TATACAAGGGCAAGCTCTCTGTG----- mirR 23 170
-----TATACAAGGGCAAGCTCTCTGTGA----- mirR 24 136
-----ATATACAAGGGCAAGCTCTCTGT----- mirR 23 115
-----TATACAAGGGCAAGCTCT----- mirR 18 111
-----TATACAAGGGCAAGCTCTCT----- mirR 20 56
-----ATACAAGGGCAAGCTCTCTG----- mirR 20 49
-----ATACAAGGGCAAGCTCTCT----- mirR 18 43
-----ATACAAGGGCAAGCTCTCTGTG----- mirR 22 24
-----ATATACAAGGGCAAGCTCTCT----- mirR 21 18
-----ATACAAGGGCAAGCTCTCTGTGA----- mirR 23 15
-----ATATACAAGGGCAAGCTCTCTG----- mirR 22 15
-----TACAAGGGCAAGCTCTCTGT----- mirR 20 14
-----AATATACAAGGGCAAGCTCTCT----- mirR 22 7
-----ATATACAAGGGCAAGCTCTCTGTGA----- mirR 25 6
-----ATATACAAGGGCAAGCTCT----- mirR 19 5
-----ATATACAAGGGCAAGCTCTCTGTG----- mirR 24 3
-----ACAAGGGCAAGCTCTCTGT----- mirR 19 2
-----ATACAAGGGCAAGCTCTCTGTGAG----- mirR 24 2
-----ACAAGGGCAAGCTCTCTGTGA----- mirR 21 1
-----AATATACAAGGGCAAGCTCTCTGT----- mirR 24 1
-----ATATACAAGGGCAAGCTCTCT----- mirR 20 1
-----AATATACAAGGGCAAGCTCTCT----- mirR 21 1
-----ATACAAGGGCAAGCTCTCT----- mirR 19 1
-----TACAAGGGCAAGCTCTCTGTGA----- mirR 22 1
-----ACAAGGGCAAGCTCTCTG----- mirR 18 1
-----GTGAGTATCAAACCTTATC----- morR 19 3
-----GAGTATCAAACCTTATCTTGGATCCCG morR 27 3
-----GTGAGTATCAAACCTTAT----- morR 18 2

```

>mmu-mir-669e

```

CCCTATATATGGGCAGGTGTGTCTTGTGTGTGCATGTTTCATTTGTGTATATGAATATGAATATACACACTTACACACTCATGCACACACACACATC species len reads
-CCTATATATGGGCAGGTGTG----- morL 20 7
CCCTATATATGGGCAGGTGTG----- morL 21 6
---ATATATGGGCAGGTGTGT----- morL 18 2
--CTATATATGGGCAGGTGTG----- morL 19 2
-----ATATGGGCAGGTGTGTGT----- morL 18 1
-----TGTCTTGTGTGTGCATGTTTCAT----- mirL 23 4203
-----TGTCTTGTGTGTGCATGTTTCAT----- mirL 22 3118
-----TGTCTTGTGTGTGCATGTTCA----- mirL 21 497
-----TGTCTTGTGTGTGCATGTTTCATTT----- mirL 24 274
-----TGTCTTGTGTGTGCATGTTTC----- mirL 20 154
-----GTCTTGTGTGTGCATGTTTCAT----- mirL 21 61
-----TGTCTTGTGTGTGCATGTT----- mirL 19 50
-----TGTCTTGTGTGTGCATGT----- mirL 18 42
-----GTCTTGTGTGTGCATGTTTCAT----- mirL 22 23

```

```

-----GTCTTGTGTGTCATGTTCA----- mirL 20 9
-----TCTTGTGTGTGCATGTTTCATTT----- mirL 22 4
-----TCTTGTGTGTGCATGTTTC----- mirL 18 4
-----TCTTGTGTGTGCATGTTTCATTT----- mirL 21 3
-----TGTGCTTGTGTGTGCAT----- mirL 18 2
-----GTCTTGTGTGTGCATGTT----- mirL 18 2
-----TCTTGTGTGTGCATGTTTCAT----- mirL 20 1
-----GTCTTGTGTGTGCATGTTTC----- mirL 19 1
-----TCTTGTGTGTGCATGTTTCATTTG----- mirL 23 1
-----GTGCTTGTGTGTGCATGTTTCATTT----- mirL 24 1
-----GTGCTTGTGTGTGCATGTTTC----- mirL 21 1
-----TCTTGTGTGTGCATGTTTCATTTGT----- mirL 24 1
-----GTCTTGTGTGTGCATGTTTCATTT----- mirL 23 1
-----TGAATATACACACACTTACACA----- mirR 22 1040
-----TGAATATACACACACTTACAC----- mirR 21 229
-----TGAATATACACACACTTACACAC----- mirR 23 182
-----TGAATATACACACACTTACA----- mirR 20 147
-----GAATATACACACACTTACACA----- mirR 21 58
-----GAATATACACACACTTACACAC----- mirR 22 25
-----TGAATATACACACACTTAC----- mirR 19 21
-----GAATATACACACACTTACAC----- mirR 20 19
-----TGAATATACACACACTTAC----- mirR 18 19
-----TGAATATACACACACTTACACACT----- mirR 24 18
-----ATATACACACACTTACACACTC----- mirR 22 7
-----GAATATACACACACTTACA----- mirR 19 6
-----GAATATACACACACTTAC----- mirR 18 5
-----GAATATACACACACTTACACACT----- mirR 23 3
-----ATATACACACACTTACACACT----- mirR 21 3
-----AATATACACACACTTACA----- mirR 18 2
-----ATATACACACACTTACACAC----- mirR 20 2
-----ATATACACACACTTACACA----- mirR 19 1
-----ATATACACACACTTACACACTCA----- mirR 23 1
-----AATATACACACACTTACACAC----- mirR 21 1
-----GAATATACACACACTTACACACTC----- mirR 24 1
-----AATATACACACACTTACACACT----- mirR 22 1
-----ATATACACACACTTACACACTCAT----- mirR 24 1
-----ACTCATGCACACACACACAC----- morR 18 10
-----ACTCATGCACACACACACAC----- morR 20 7
-----CACTCATGCACACACACACACA----- morR 22 6
-----ACACTCATGCACACACACAC----- morR 18 5
-----ACTCATGCACACACACACACATC----- morR 23 4
-----ACACTCATGCACACACACACAC----- morR 22 4
-----ACACTCATGCACACACACACACA----- morR 21 3
-----TCATGCACACACACACAC----- morR 18 3
-----CACTCATGCACACACACACAC----- morR 19 3
-----ACTCATGCACACACACACACA----- morR 21 3

```

```

-----ACTCATGCACACACACACAT- morR 22 3
-----ATGCACACACACACACATC morR 19 2
-----CTCATGCACACACACACAC--- morR 19 2
-----ACACTCATGCACACACACAC--- morR 20 2
-----CACTCATGCACACACACACAC--- morR 21 2
-----CTCATGCACACACACACACAC--- morR 18 2
-----CTCATGCACACACACACACAC-- morR 20 1
-----ACTCATGCACACACACACACAC--- morR 19 1
-----CACTCATGCACACACACACACAT- morR 23 1

>mmu-mir-466f-3
TCATGTATGTGCATGTGTGTTACGTGTGTGCATGTGCATGTGTATATGAATATATGTATACATACACACACACATACACACGCACGCAACACACACACACACACACACACACG species len reads
-----ATGTGCATGTGTGTTTAC----- morL 18 5
TCATGTATGTGCATGTGTG----- morL 19 1
-----TATGTGCATGTGTGTTTAC----- morL 19 1
---TGTATGTGCATGTGTGTTA----- morL 20 1
---TGTATGTGCATGTGTGTTTAC----- morL 21 1
TCATGTATGTGCATGTGTGTT----- morL 21 1
-----ACGTGTGTGTGCATGTGCATGT----- mirL 22 1786
-----ACGTGTGTGTGCATGTGCATGTGT----- mirL 24 203
-----ACGTGTGTGTGCATGTGCATG----- mirL 21 107
-----ACGTGTGTGTGCATGTGCATGTG----- mirL 23 62
-----ACGTGTGTGTGCATGTGCAT----- mirL 20 41
-----CGTGTGTGTGCATGTGCATGTGT----- mirL 23 40
-----TACGTGTGTGTGCATGTGCATG----- mirL 22 25
-----ACGTGTGTGTGCATGTGCA----- mirL 19 16
-----CGTGTGTGTGCATGTGCATGTG----- mirL 22 12
-----TACGTGTGTGTGCATGTGCAT----- mirL 21 11
-----ACGTGTGTGTGCATGTGCATGTGTG----- mirL 25 8
-----CGTGTGTGTGCATGTGCATGT----- mirL 21 2
-----TACGTGTGTGTGCATGTGCATGT----- mirL 23 1
-----TTACGTGTGTGTGCATGTGCATG----- mirL 23 1
-----TTACGTGTGTGTGCATGT----- mirL 18 1
-----TTACGTGTGTGTGCATGTGC----- mirL 20 1
-----TATATGAATATATGTATAC----- loop 19 1
-----TATATGAATATATGTATACA----- loop 20 1
-----ATACACACACACATACACACGC----- mirR 22 4907
-----ATACACACACACATACACACG----- mirR 21 966
-----ATACACACACACATACACACGCA----- mirR 23 778
-----ATACACACACACATACACACGCAC----- mirR 24 183
-----CATACACACACATACACACGC----- mirR 23 183
-----TACACACACACATACACACGC----- mirR 21 158
-----CATACACACACATACACACG----- mirR 22 92
-----CATACACACACATACACAC----- mirR 21 83
-----TACACACACACATACACACGCA----- mirR 22 80
-----CATACACACACATACACAC----- mirR 20 76

```

```
-----ACACACACACATACACACGC----- mirR 20 73
-----ATACACACACACATACACACGCACG----- mirR 25 46
-----CATACACACACACATACACACGCA----- mirR 24 36
-----ACACACACACATACACACGCA----- mirR 21 31
-----TACACACACACATACACACG----- mirR 20 22
-----CACACACACATACACACGCAC----- mirR 21 19
-----ATACACACACACATACACACGCACGC----- mirR 26 19
-----CACACACACATACACACGC----- mirR 19 17
-----CACACACACATACACACGCA----- mirR 20 13
-----TACACACACACATACACACGCAC----- mirR 23 9
-----ACACACACACATACACACG----- mirR 19 8
-----ACACACACACATACACACGCAC----- mirR 22 7
-----TACATACACACACACATA----- mirR 18 5
-----TACATACACACACACACATACACA----- mirR 22 4
-----CATACACACACACATACACA----- mirR 18 3
-----TACATACACACACACATACACAC----- mirR 23 2
-----TACACACACACATACACACGCACGC----- mirR 25 2
-----CACACACACATACACACGCACG----- mirR 22 2
-----TACATACACACACACATACACACGC----- mirR 25 2
-----ACATACACACACACATACACAC----- mirR 22 2
-----ACATACACACACACATACACACGC----- mirR 24 1
-----TACATACACACACACATACACA----- mirR 20 1
-----CACACACACATACACACGCACGCA----- mirR 24 1
-----TACATACACACACACATAC----- mirR 19 1
-----CATACACACACACATACACACGCAC----- mirR 25 1
-----ACATACACACACACATACACA----- mirR 21 1
-----CACACACACATACACACG----- mirR 18 1
-----ACATACACACACACATACACACG----- mirR 23 1
-----CGCAACACACACACACAC----- morR 18 8
-----ACGCAACACACACACACACACA----- morR 22 8
-----GCACGCAACACACACACACACACACAC----- morR 31 6
-----CAGCGCAACACACACACACACAC----- morR 22 6
-----GCAACACACACACACACAC----- morR 19 6
-----ACGCAACACACACACACACACA----- morR 20 5
-----CAGCGCAACACACACACACAC----- morR 20 4
-----ACGCAACACACACACACACAC----- morR 21 4
-----GCAACACACACACACACACACA----- morR 24 4
-----ACGCAACACACACACACACACAC----- morR 23 3
-----CGCAACACACACACACACACAC----- morR 24 3
-----GCAACACACACACACACACAC----- morR 23 3
-----CGCAGCGCAACACACACACACAC----- morR 22 3
-----CAACACACACACACACACACAC----- morR 24 3
-----ACGCAACACACACACACAC----- morR 19 3
-----CAACACACACACACACACAC----- morR 22 3
-----GCACGCAACACACACACACACAC----- morR 23 2
-----ACGCAACACACACACACACA----- morR 18 2
```

```

-----CAACACACACACACACAC----- morR 20 2
-----ACGCAACACACACACACACAC----- morR 25 2
-----GCACGCAACACACACACAC----- morR 21 2
-----GCAACACACACACACACAC----- morR 21 2
-----CGCACGCAACACACACACAC----- morR 24 2
-----GCACGCAACACACACACAC----- morR 19 1
-----CAACACACACACACACAC----- morR 18 1
-----GCACGCAACACACACAC----- morR 18 1
-----CGCACGCAACACACACAC----- morR 18 1
-----CGCAACACACACACACACACAC----- morR 28 1
-----CGCAACACACACACACACAC----- morR 22 1
-----GCACGCAACACACACACACACAC----- morR 29 1
-----CGCAACACACACACACACACAC----- morR 26 1
-----CGCAACACACACACACACAC----- morR 20 1
-----GCAACACACACACACAC----- morR 18 1
-----CAACACACACACACACAC----- morR 21 1
-----CACGCAACACACACACACAC----- morR 23 1
-----CACGCAACACACACACACACACACG morR 31 1
-----CAACACACACACACACAC----- morR 19 1
-----CGCACGCAACACACACACACACAC----- morR 32 1
-----CGCACGCAACACACACACAC----- morR 20 1
-----CACGCAACACACACACAC----- morR 18 1
-----GCACGCAACACACACACAC----- morR 20 1
-----CAACACACACACACACACAC----- morR 26 1
-----CACGCAACACACACACACACAC----- morR 29 1

```

>mmu-mir-1934

| Species | len | reads |
|---------|-----|-------|
| morL    | 20  | 2     |
| morL    | 18  | 1     |
| morL    | 18  | 1     |
| mirL    | 23  | 2524  |
| mirL    | 22  | 412   |
| mirL    | 21  | 109   |
| mirL    | 24  | 101   |
| mirL    | 23  | 94    |
| mirL    | 22  | 87    |
| mirL    | 25  | 40    |
| mirL    | 24  | 36    |
| mirL    | 21  | 35    |
| mirL    | 20  | 33    |
| mirL    | 20  | 30    |
| mirL    | 19  | 27    |
| mirL    | 24  | 22    |
| mirL    | 21  | 15    |
| mirL    | 18  | 10    |

```

-----TTCTGGTCCCCTGCTTCGTCCTC----- mirL 23 8
-----TGGTCCCCTGCTTCGTCCT----- mirL 19 8
-----CTGGTCCCCTGCTTCGTCCT----- mirL 19 7
-----TGGTCCCCTGCTTCGTCCT----- mirL 20 6
-----CTGGTCCCCTGCTTCGTCCTCTG----- mirL 23 5
-----TTTCTGGTCCCCTGCTTCGTCCT----- mirL 22 5
-----CTGGTCCCCTGCTTCGTCCT----- mirL 18 4
-----TTCTGGTCCCCTGCTTCGTCCT----- mirL 22 4
-----TTCTGGTCCCCTGCTTCGTCCT----- mirL 19 3
-----TGGTCCCCTGCTTCGTCCTCTG----- mirL 22 3
-----CTGGTCCCCTGCTTCGTCCT----- mirL 20 2
-----TTTCTGGTCCCCTGCTTCGTCCTCTG----- mirL 26 2
-----TTTCTGGTCCCCTGCTTCGTCCTCT----- mirL 25 2
-----TTTCTGGTCCCCTGCTTCGTCCT----- mirL 21 1
-----TGGTCCCCTGCTTCGTCCT----- mirL 18 1
-----GGTCCCCTGCTTCGTCCTC----- mirL 19 1
-----CTTTCTGGTCCCCTGCTTCGTCCTC----- mirL 25 1
-----TTTCTGGTCCCCTGCTTCGTCCT----- mirL 21 1
-----TTTCTGGTCCCCTGCTTCGTCCT----- mirL 20 1
-----GGGGCTGGTGAGATGGCTCAGC----- mirR 22 693
-----GGGGCTGGTGAGATGGCTCAG----- mirR 21 610
-----GGGGCTGGTGAGATGGCTCAGCGGTTAAGA----- mirR 30 586
-----GGGGCTGGTGAGATGGCTCAGCGGTTAAGAGC----- mirR 32 447
-----GGGGCTGGTGAGATGGCTCAGCGGTTAAG----- mirR 29 433
-----GGGCTGGTGAGATGGCTCAG----- mirR 20 378
-----GGGCTGGTGAGATGGCTCAGCGG----- mirR 23 347
-----GGGCTGGTGAGATGGCTCAG----- mirR 19 337
-----GGGCTGGTGAGATGGCTCAGCGGTTAAGAGC----- mirR 31 329
-----GGGCTGGTGAGATGGCTCAGCGGTTA----- mirR 26 317
-----GGGGCTGGTGAGATGGCTCAGCGG----- mirR 24 305
-----GGGCTGGTGAGATGGCTCAGC----- mirR 21 270
-----GGGGCTGGTGAGATGGCTCAG----- mirR 20 250
-----GGGCTGGTGAGATGGCTCAGCGGTTAAGA----- mirR 29 232
-----GCTGGTGAGATGGCTCAG----- mirR 18 126
-----GGCTGGTGAGATGGCTCAG----- mirR 19 86
-----TGGGGCTGGTGAGATGGCTCAG----- mirR 22 82
-----GGCTGGTGAGATGGCTCAGCGGTTA----- mirR 25 61
-----GGCTGGTGAGATGGCTCAGCGGTT----- mirR 24 60
-----GGCTGGTGAGATGGCTCAG----- mirR 18 55
-----GGCTGGTGAGATGGCTCAGCGGTTAAGAGC----- mirR 30 49
-----GCTGGTGAGATGGCTCAGCGGTT----- mirR 22 49
-----GGCTGGTGAGATGGCTCAGC----- mirR 20 47
-----TGGGGCTGGTGAGATGGCTCAGC----- mirR 23 44
-----GCTGGTGAGATGGCTCAGC----- mirR 19 43
-----GGCTGGTGAGATGGCTCAGCG----- mirR 21 41
-----GCTGGTGAGATGGCTCAGCGGTTAAGA----- mirR 27 39

```



```

-----TGGGGCTGGTGAGATGGCTC----- mirR 20 36
-----TGGGGCTGGTGAGATGGCT----- mirR 19 35
-----GCTGGTGAGATGGCTCAGCGTT----- mirR 23 28
-----GCTGGTGAGATGGCTCAGCG----- mirR 20 26
-----TGGGGCTGGTGAGATGGCTCAGCGGTTAAGAGC----- mirR 33 25
-----GTGGGGCTGGTGAGATGGCTCAG----- mirR 23 24
-----GCTGGTGAGATGGCTCAGCGGTTAAGAGC----- mirR 29 19
-----TGGGGCTGGTGAGATGGCTCAGCG----- mirR 24 18
-----TGGGGCTGGTGAGATGGCTCA----- mirR 21 15
-----GTGGGGCTGGTGAGATGGCTC----- mirR 21 9
-----GTGGGGCTGGTGAGATGGCTCA----- mirR 22 8
-----GTGGGGCTGGTGAGATGGCTCAGC----- mirR 24 7
-----GTGGGGCTGGTGAGATGGCTCAGCGGT----- mirR 27 7
-----GTGGGGCTGGTGAGATGG----- mirR 18 5
-----GTGGGGCTGGTGAGATGGC----- mirR 19 5
-----GGTGGGGCTGGTGAGATGGC----- mirR 20 4
-----GGTGGGGCTGGTGAGATGGCTCAGCGGTTAAGA----- mirR 33 3
-----GGTGGGGCTGGTGAGATGG----- mirR 18 3
-----GGTGGGGCTGGTGAGATGGCTCAG----- mirR 24 2
-----GGTGGGGCTGGTGAGATGGCT----- mirR 21 1
-----GGTGGGGCTGGTGAGATGGCTC----- mirR 22 1
-----GGTGGGGCTGGTGAGATGGCTCAGCGGTTA----- mirR 30 1
-----CGGTTAAGAGCGCCGATT----- morR 18 3
-----GGTTAAGAGCGCCGATTGCT----- morR 20 2
-----GTTAAGAGCGCCGATTGCTCTTCC morR 24 1
-----GCGGTTAAGAGCGCCGAT----- morR 18 1
-----GGTTAAGAGCGCCGATTGCT----- morR 19 1
-----GCGGTTAAGAGCGCCGATTGCTC----- morR 23 1
-----AGCGGTTAAGAGCGCCGAT----- morR 19 1
-----CGGTTAAGAGCGCCGATTGCT----- morR 20 1
-----TAAGAGCGCCGATTGCTC----- morR 18 1
-----GCGGTTAAGAGCGCCGATTGCTCTTC----- morR 26 1

```

>mmu-mir-207

```

CGCGCGGAGCAAGGCAGGGGTGAGGGGCTGCGGGAGGAGCCGGGCGGAGGCTGCGGCTTGCCTTCTCCTGGCTCTCCTCCCTCT species len reads
CGCGCGGAGCAAGGCAGG----- morL 18 2
--CGCGGAGCAAGGCAGGG----- morL 18 2
GGAGCAAGGCAGGGGTGA----- morL 18 1
-----GAGGGCTGCGGGAGGAG----- mirL 18 25
-----AGGGCTGCGGGAGGAGC----- mirL 18 3
-----AGGGCTGCGGGAGGAGCCG----- mirL 20 1
-----GGTGAGGGGCTGCGGGAG----- mirL 19 1
-----GGGCTGCGGGAGGAGCCG----- mirL 18 1
-----GAGGGCTGCGGGAGGAGC----- mirL 19 1
-----TGAGGGCTGCGGGAGGAG----- mirL 19 1
-----AGGGCTGCGGGAGGAGCC----- mirL 19 1

```

```

-----GGGGCTGCGGGAGGAGCC----- mirL 18 1
-----GCTTCTCCTGGCTCTCCTCCCTC- mirR 23 8707
-----GCTTCTCCTGGCTCTCCTCCCT-- mirR 22 697
-----GCTTCTCCTGGCTCTCCTCCC--- mirR 21 112
-----TTCTCCTGGCTCTCCTCCCTC- mirR 21 102
-----CTTCTCCTGGCTCTCCTCCCTC- mirR 22 100
-----TCTCCTGGCTCTCCTCCCTC- mirR 20 80
-----GCTTCTCCTGGCTCTCCTCC--- mirR 20 69
-----GCTTCTCCTGGCTCTCCTC---- mirR 19 36
-----GCTTCTCCTGGCTCTCCT---- mirR 18 28
-----TTCTCCTGGCTCTCCTCCCT-- mirR 20 21
-----GCTTCTCCTGGCTCTCCTCCCTT mirR 24 15
-----GCGCTTCTCCTGGCTCTCCTCCCTC- mirR 25 8
-----CGCTTCTCCTGGCTCTCCTCCCTC- mirR 24 6
-----CTTCTCCTGGCTCTCCTCCCT-- mirR 21 6
-----TCTCCTGGCTCTCCTCCCT-- mirR 19 6
-----CTTCTCCTGGCTCTCCTC---- mirR 18 5
-----CTTCTCCTGGCTCTCCTCC--- mirR 19 4
-----CTTCTCCTGGCTCTCCTCCCTCT mirR 23 3
-----TTCTCCTGGCTCTCCTCCC--- mirR 19 3
-----TCTCCTGGCTCTCCTCCC--- mirR 18 2
-----CGCTTCTCCTGGCTCTCC---- mirR 18 1
-----CTTCTCCTGGCTCTCCTCCC--- mirR 20 1
-----GCGCTTCTCCTGGCTCTC----- mirR 18 1
-----GCGCTTCTCCTGGCTCTCCTC---- mirR 21 1
-----TTCTCCTGGCTCTCCTCC--- mirR 18 1
-----TTCTCCTGGCTCTCCTCCCTCT mirR 22 1
-----TGCGCTTCTCCTGGCTCTC----- mirR 19 1
-----CGCTTCTCCTGGCTCTCCTCCCT-- mirR 23 1

```

>mmu-mir-466f-2

```

ACCCATGTATGTGAATGTGTGTTTACGTGTGTGTCATGTGCATGTGTATATGAATATATGTATACATACACACACATACACTCATGTAACACACACACACACACACACG species len reads
----ATGTATGTGAATGTGTGTTT----- morL 20 2
----ATGTGAATGTGTGTTTACG----- morL 19 1
ACCCATGTATGTGAATGTGTGTT----- morL 23 1
-CCCATGTATGTGAATGTGTGT----- morL 21 1
-CCCATGTATGTGAATGTGTG----- morL 20 1
-----ACGTGTGTGTGCATGTGCATGT----- mirL 22 1786
-----ACGTGTGTGTGCATGTGCATGTGT----- mirL 24 203
-----ACGTGTGTGTGCATGTGCATG----- mirL 21 107
-----ACGTGTGTGTGCATGTGCATGTG----- mirL 23 62
-----ACGTGTGTGTGCATGTGCAT----- mirL 20 41
-----CGTGTGTGTGCATGTGCATGTGT----- mirL 23 40
-----TACGTGTGTGTGCATGTGCATG----- mirL 22 25
-----ACGTGTGTGTGCATGTGCA----- mirL 19 16
-----CGTGTGTGTGCATGTGCATGTG----- mirL 22 12

```

---

|                                     |      |    |      |
|-------------------------------------|------|----|------|
| -----TACGTGTGTGTGCATGTGCAT-----     | mirL | 21 | 11   |
| -----ACGTGTGTGTGCATGTGCATGTGTG----- | mirL | 25 | 8    |
| -----CGTGTGTGTGCATGTGCATGT-----     | mirL | 21 | 2    |
| -----TACGTGTGTGTGCATGTGCATGT-----   | mirL | 23 | 1    |
| -----TTACGTGTGTGTGCATGTGCATG-----   | mirL | 23 | 1    |
| -----TTACGTGTGTGTGCATGT-----        | mirL | 18 | 1    |
| -----TTACGTGTGTGTGCATGTGC-----      | mirL | 20 | 1    |
| -----TATATGAATATATGTATAC-----       | loop | 19 | 1    |
| -----TATATGAATATATGTATACA-----      | loop | 20 | 1    |
| -----ATACACACACACATACACACTC-----    | mirR | 22 | 4213 |
| -----ATACACACACACATACACTCA-----     | mirR | 23 | 1604 |
| -----CATACACACACACATACACTC-----     | mirR | 23 | 240  |
| -----TACACACACACATACACTC-----       | mirR | 21 | 195  |
| -----ACACACACACATACACTCA-----       | mirR | 21 | 183  |
| -----TACACACACACATACACTCA-----      | mirR | 22 | 182  |
| -----ATACACACACACATACACTCAT-----    | mirR | 24 | 155  |
| -----ACACACACACATACACTC-----        | mirR | 20 | 123  |
| -----CATACACACACACATACACT-----      | mirR | 22 | 116  |
| -----CACACACACATACACTCA-----        | mirR | 20 | 110  |
| -----CATACACACACATACACAC-----       | mirR | 21 | 83   |
| -----CATACACACACATACACA-----        | mirR | 20 | 76   |
| -----CATACACACACATACACTCA-----      | mirR | 24 | 62   |
| -----ATACACACACATACACTCATG-----     | mirR | 25 | 24   |
| -----CACACACATACACTCAT-----         | mirR | 21 | 18   |
| -----CACACACATACACTC-----           | mirR | 19 | 8    |
| -----TACATACACACACACATA-----        | mirR | 18 | 5    |
| -----ACACACACATACACTCAT-----        | mirR | 22 | 5    |
| -----ACATACACACACATACACTC-----      | mirR | 24 | 4    |
| -----CACACACATACACTCATG-----        | mirR | 22 | 4    |
| -----TACATACACACACATACACA-----      | mirR | 22 | 4    |
| -----ACACACACATACACTCATG-----       | mirR | 23 | 3    |
| -----TACACACACATACACTCAT-----       | mirR | 23 | 3    |
| -----CATACACACACATACA-----          | mirR | 18 | 3    |
| -----TACATACACACACATACACAC-----     | mirR | 23 | 2    |
| -----CATACACACACATACACTCAT-----     | mirR | 25 | 2    |
| -----ACATACACACACATACACT-----       | mirR | 23 | 2    |
| -----ACATACACACACATACACAC-----      | mirR | 22 | 2    |
| -----TACATACACACACATACA-----        | mirR | 20 | 1    |
| -----TACATACACACACATACACT-----      | mirR | 24 | 1    |
| -----CACACACATACACTCATGT-----       | mirR | 23 | 1    |
| -----ATACACACACATACACTCATGTA-----   | mirR | 27 | 1    |
| -----TACATACACACACATACACTCA-----    | mirR | 26 | 1    |
| -----TACATACACACACATAC-----         | mirR | 19 | 1    |
| -----ACATACACACACATACACA-----       | mirR | 21 | 1    |
| -----ATACACACACATACACTCATGT-----    | mirR | 26 | 1    |
| -----TAAACACACACACACACACAC-----     | morR | 22 | 11   |

```

-----ATGTAACACACACACACACACA----- morR 22 10
-----CATGTAACACACACACACACAC----- morR 22 8
-----ATGTAACACACACACACACACACA-- morR 26 8
-----TCATGTAACACACACACACACACA----- morR 22 6
-----ATGTAACACACACACACACACACAC- morR 27 5
-----CTCATGTAACACACACACACACAC----- morR 22 4
-----ATGTAACACACACACACACACAC----- morR 23 4
-----GTAACACACACACACACACAC----- morR 21 3
-----TGTAACACACACACACACACAC----- morR 22 3
-----ATGTAACACACACACACACACAC----- morR 21 3
-----GTAACACACACACACACACAC----- morR 23 2
-----TAACACACACACACACACAC----- morR 18 2
-----TCATGTAACACACACACACACACACAG morR 30 2
-----CTCATGTAACACACACACACACACA----- morR 23 2
-----TAACACACACACACACACACAC----- morR 24 2
-----GTAACACACACACACACACAC----- morR 19 2
-----CTCATGTAACACACACACACACA----- morR 21 2
-----CATGTAACACACACACACACACA----- morR 21 1
-----TGTAACACACACACACACACA----- morR 21 1
-----GTAACACACACACACACACACAC----- morR 25 1
-----ATGTAACACACACACACACA----- morR 18 1
-----CTCATGTAACACACACACACAC----- morR 20 1
-----CATGTAACACACACACACAC----- morR 18 1
-----ATGTAACACACACACACAC----- morR 19 1
-----TCATGTAACACACACACACA----- morR 20 1

```

>mmu-mir-297a-5

```

CCCCAGTGTATGTGCCTGTGTGTATATGTATGTGTGCATGTGCATGTGTGTATATGAGTATACATATACATACGCACATACCCATACAAGCATGCACACAAACCCAAAACCTGCCACTC species len reads
--CCAGTGTATGTGCCTGTGTGT----- morL 22 29
-----GTGTATGTGCCTGTGTGTAT----- morL 20 11
---CCAGTGTATGTGCCTGTGTGTAT----- morL 23 11
---CAGTGTATGTGCCTGTGTGT----- morL 20 6
---CCAGTGTATGTGCCTGTGTGT----- morL 21 6
---AGTGTATGTGCCTGTGTGTAT----- morL 21 6
-CCCCAGTGTATGTGCCTGTGTGT----- morL 23 5
---CCAGTGTATGTGCCTGTGTGTAT----- morL 24 3
---CCAGTGTATGTGCCTGTGTGTA----- morL 22 2
---CAGTGTATGTGCCTGTGTGTAT----- morL 22 2
---AGTGTATGTGCCTGTGTGT----- morL 19 2
---GTGTATGTGCCTGTGTGT----- morL 18 2
CCCCAGTGTATGTGCCTGTGTGTATA----- morL 27 2
-CCCCAGTGTATGTGCCTGTGTGTAT----- morL 25 2
---AGTGTATGTGCCTGTGTG----- morL 18 1
---CCAGTGTATGTGCCTGTGTG----- morL 20 1
-----ATGTATGTGTGCATGTGCATGT----- mirL 22 2164
-----ATGTATGTGTGCATGTGCATG----- mirL 21 141

```

```

-----ATGTATGTGTGCATGTGCATGTG----- mirL 23 52
-----ATGTATGTGTGCATGTGCATGTGT----- mirL 24 45
-----ATGTATGTGTGCATGTGCAT----- mirL 20 38
-----GTATGTGTGCATGTGCATGT----- mirL 20 10
-----TGTATGTGTGCATGTGCATGT----- mirL 21 9
-----ATGTATGTGTGCATGTGCA----- mirL 19 9
-----GTATGTGTGCATGTGCATG----- mirL 19 4
-----ATGTATGTGTGCATGTGC----- mirL 18 4
-----TATGTATGTGTGCATGTGCAT----- mirL 21 3
-----TGTATGTGTGCATGTGCATG----- mirL 20 2
-----TATGTATGTGTGCATGTGCATG----- mirL 22 2
-----ATATGTATGTGTGCATGTGC----- mirL 20 2
-----ATATGTATGTGTGCATGTG----- mirL 19 1
-----ATATGTATGTGTGCATGTGCATGT----- mirL 24 1
-----TATATGTATGTGTGCATGTG----- mirL 20 1
-----TGTATGTGTGCATGTGCATGTGT----- mirL 23 1
-----TGTATGTGTGCATGTGCATGTG----- mirL 22 1
-----TATGTATGTGTGCATGTGCATGT----- mirL 23 1
-----GTATGTGTGCATGTGCAT----- mirL 18 1
-----TATATGTATGTGTGCATGTGC----- mirL 21 1
-----ATATGTATGTGTGCATGTGCAT----- mirL 22 1
-----GTATGTGTGCATGTGCATGTG----- mirL 21 1
-----ATATGTATGTGTGCATGTGCATGTGT----- mirL 26 1
-----TGTGTGTATATGAGTATAC----- loop 19 2
-----TGTGTGTATATGAGTATACAT----- loop 21 1
-----GTGTGTATATGAGTATAC----- loop 18 1
-----ATATACATACGCACATACCCAT----- mirR 22 3675
-----ATATACATACGCACATACCCATA----- mirR 23 2774
-----ATATACATACGCACATACCCA----- mirR 21 205
-----TATACATACGCACATACCCATA----- mirR 22 125
-----TATACATACGCACATACCCAT----- mirR 21 92
-----ATATACATACGCACATACCC----- mirR 20 70
-----ATACATACGCACATACCCAT----- mirR 20 44
-----ATACATACGCACATACCCATA----- mirR 21 28
-----ATATACATACGCACATACCCATAC----- mirR 24 21
-----CATATACATACGCACATACCCAT----- mirR 23 20
-----ATACATACGCACATACCCA----- mirR 19 19
-----ACATATACATACGCACATACCCA----- mirR 23 18
-----ATATACATACGCACATACCC----- mirR 19 15
-----CATATACATACGCACATACCC----- mirR 21 12
-----TATACATACGCACATACCCATAC----- mirR 23 8
-----ATATACATACGCACATACCCATACA----- mirR 25 6
-----TACATACGCACATACCCATA----- mirR 20 5
-----ATACATACGCACATACCCATAC----- mirR 22 4
-----CATATACATACGCACATACCCA----- mirR 22 3
-----TACATACGCACATACCCATAC----- mirR 21 2

```

```

-----ACATATACATACGCACATACCCAT----- mirR 24 2
-----CATATACATACGCACATACC----- mirR 20 2
-----CATATACATACGCACATACCCATA----- mirR 24 2
-----CATATACATACGCACATA----- mirR 18 1
-----TACATACGCACATACCCAT----- mirR 19 1
-----TACATATACATACGCACA----- mirR 18 1
-----TATACATACGCACATACCCATACA----- mirR 24 1
-----TACATATACATACGCACATA----- mirR 21 1
-----ACAAGCATGCACACAAACCCA----- morR 21 4
-----ACAAGCATGCACACAAACCCAAA----- morR 23 1
-----ACAAGCATGCACACAAACCCAAAACCTGCCACTC morR 33 1
-----ACAAGCATGCACACAAACCCAAAACCTGCCA--- morR 30 1
-----ACAAGCATGCACACAAAC----- morR 18 1
-----CAAGCATGCACACAAACC----- morR 18 1
-----ATACAAGCATGCACACAAACC----- morR 21 1
-----CATACAAGCATGCACACAA----- morR 19 1
-----CAAGCATGCACACAAACC----- morR 19 1

```

>mmu-mir-3072

```

AAGGTGGCAGGGCTGTTGAGTGCGAGGGACCCCGAGGGAGGGCAGGCTGCCCCAGGCCCTGCCCCCTCCAGGAAGCCTTCTTGCTCCAGCCCAACACACA species len reads
---GTGGCAGGGCTGTTGAGTGCG----- morL 21 19
--GGTGGCAGGGCTGTTGAGTGCG----- morL 22 7
---GTGGCAGGGCTGTTGAGTGCGA----- morL 22 3
---GTGGCAGGGCTGTTGAGTGCG----- morL 20 2
---TGGCAGGGCTGTTGAGTGCG----- morL 20 2
---TGGCAGGGCTGTTGAGTGCG----- morL 19 1
---GTGGCAGGGCTGTTGAGTG----- morL 19 1
-AGGTGGCAGGGCTGTTGAGTGCG----- morL 23 1
AAGGTGGCAGGGCTGTTGAGTGCG----- morL 23 1
---GTGGCAGGGCTGTTGAGTGCGAG----- morL 23 1
-----CAGGGCTGTTGAGTGCGA----- morL 18 1
-----AGGGACCCCGAGGGAGGGCAGG----- mirL 22 189
-----AGGGACCCCGAGGGAGGGCAGGCT----- mirL 24 89
-----AGGGACCCCGAGGGAGGGCAGGC----- mirL 23 81
-----AGGGACCCCGAGGGAGGGCAGGCTG----- mirL 25 40
-----AGGGACCCCGAGGGAGGGCAG----- mirL 21 30
-----AGGGACCCCGAGGGAGGGC----- mirL 19 12
-----AGGGACCCCGAGGGAGGGCA----- mirL 20 4
-----GGACCCCGAGGGAGGGCAGG----- mirL 20 1
-----GGGACCCCGAGGGAGGGCAG----- mirL 20 1
-----AGGCTGCCCCAGGCCCTG----- loop 18 1
-----GGCTGCCCCAGGCCCTGC----- loop 18 1
-----AGGCTGCCCCAGGCCCTGC----- loop 19 1
-----TGCCCCCTCCAGGAAGCCTTCT----- mirR 22 7804
-----TGCCCCCTCCAGGAAGCCTTC----- mirR 21 571
-----TGCCCCCTCCAGGAAGCCTTCT----- mirR 23 373

```

```
-----GCCCCCTCCAGGAAGCCTTCT----- mirR 21 148
-----TGCCCCCTCCAGGAAGCCTT----- mirR 20 135
-----TGCCCCCTCCAGGAAGCCTTCTTG----- mirR 24 93
-----TGCCCCCTCCAGGAAGCCTTCTTGC----- mirR 25 59
-----GCCCCCTCCAGGAAGCCTTC----- mirR 20 21
-----GCCCCCTCCAGGAAGCCTTCTT----- mirR 22 14
-----TGCCCCCTCCAGGAAGCCT----- mirR 19 7
-----CTGCCCCCTCCAGGAAGC----- mirR 18 2
-----CCCCCTCCAGGAAGCCTTCT----- mirR 20 1
-----GCCCCCTCCAGGAAGCCTTCTTGC----- mirR 24 1
-----GCCCCCTCCAGGAAGCCTT----- mirR 19 1
-----CCCCCTCCAGGAAGCCTTC----- mirR 19 1
-----CCCCCTCCAGGAAGCCTTC----- mirR 18 1
-----CCCCCTCCAGGAAGCCTTCTTGC----- mirR 21 1
-----GCCCCCTCCAGGAAGCCTTCTTGC----- mirR 23 1
-----CCTGCCCCCTCCAGGAAG----- mirR 18 1
-----GCTCCAGCCCAACACACA morR 18 3
-----CTTGCTCCAGCCCAACAC--- morR 18 2
-----TGCTCCAGCCCAACACACA morR 19 1
-----CTTGCTCCAGCCCAACACA-- morR 19 1
-----TCTTGCTCCAGCCCAACAC--- morR 19 1
-----TCTTGCTCCAGCCCAACACACA morR 22 1
```

>mmu-mir-346

```
GGAGGTCTCTGTGTTGGGCGTCTGTCTGCCCCGAGTGCCTGCCTCTCTGTGCTCTGAAGGAGGCAGGGGCTGGGCCCTGCAGCTGCCTGGGCAGAGCTGCTCCTTCGAGGGACACACTGCTGGCTCCTCTCTCTGGTTACAG
GGAGGTCTCTGTGTTGGGCG-----
-GAGGTCTCTGTGTTGGGCGT-----
-----TCTCTGTGTTGGGCGTCTG-----
-GAGGTCTCTGTGTTGGGCG-----
-----GTCTCTGTGTTGGGCGTC-----
--AGGTCTCTGTGTTGGGCG-----
-----TGTCTGCCCGAGTGCCTGCCTCT-----
-----TGTCTGCCCGAGTGCCTGCCTC-----
-----GTCTGCCCGAGTGCCTGCCTCT-----
-----TGTCTGCCCGAGTGCCTGCCT-----
-----TGTCTGCCCGAGTGCCTGCCTCTC-----
-----TGTCTGCCCGAGTGCCTGCC-----
-----CTGCCCGAGTGCCTGCCTCT-----
-----TCTGCCCGAGTGCCTGCCTCT-----
-----GTCTGCCCGAGTGCCTGCCTC-----
-----TGTCTGCCCGAGTGCCTGCCTCTG-----
-----CTGTCTGCCCGAGTGCCTGCCTCT-----
-----CTGTCTGCCCGAGTGCCTGCCTCT-----
-----TCTGTCTGCCCGAGTGCCTGC-----
-----TCTGTCTGCCCGAGTGCCTGCCTCT-----
```

```

-----TCTGCCCCGAGTGCCTGCCTC-----
-----GTCTGCCCCGAGTGCCTGCCTCTC-----
-----GTCTGCCCCGAGTGCCTGCCTCTCT-----
-----CTGTCTGCCCCGAGTGCCTGCCTCTC-----
-----TCTGTCTGCCCCGAGTGCCTGCCTC-----
-----TCTGTCTGCCCCGAGTGCCTGCCT-----
-----CTGCCCCGAGTGCCTGCCTC-----
-----CTGTCTGCCCCGAGTGCCTGCCTC-----
-----GTCTGCCCCGAGTGCCTGCCT-----
-----TCTGTCTGCCCCGAGTGCCTGCC-----
-----TCTGTCTGCCCCGAGTGCCT-----
-----CTGTCTGCCCCGAGTGCCTGCCT-----
-----ACACACTGCTGGCTCCTC-----
-----CACTGCTGGCTCCTCTCT-----
-----GACACACTGCTGGCTCCTCTC-----
-----GGGACACACTGCTGGCTC-----
-----TCTGGTTACAG
-----CTCTCTGGTTACAG
-----TCTGGTTACAG
-----CTCTGGTTACAG

```

>mmu-mir-469

| Species | len | reads |
|---------|-----|-------|
| morL    | 18  | 1     |
| morL    | 19  | 1     |
| morL    | 18  | 1     |
| morL    | 19  | 1     |
| morL    | 20  | 1     |
| mirL    | 26  | 7387  |
| mirL    | 25  | 789   |
| mirL    | 24  | 353   |
| mirL    | 25  | 278   |
| mirL    | 23  | 136   |
| mirL    | 24  | 109   |
| mirL    | 20  | 61    |
| mirL    | 23  | 46    |
| mirL    | 18  | 20    |
| mirL    | 22  | 19    |
| mirL    | 22  | 18    |
| mirL    | 21  | 15    |
| mirL    | 22  | 14    |
| mirL    | 24  | 12    |
| mirL    | 26  | 12    |
| mirL    | 20  | 11    |
| mirL    | 27  | 7     |
| mirL    | 23  | 5     |



```

-----GCCTCTTTCATTGATCTTGGTG----- mirL 22 2
-----GCCTCTTTCATTGATCTT----- mirL 18 2
-----GCCTCTTTCATTGATCTT----- mirL 19 1
-----GGTAGCCTTTTGCCTCTG----- mirR 18 347
-----GGTAGCCTTTTGCCTCTGC----- mirR 19 16
-----GTAGCCTTTTGCCTCTGC----- mirR 18 7
-----GGTAGCCTTTTGCCTCTGCT----- mirR 20 2
-----GTAGCCTTTTGCCTCTGCTC----- mirR 20 1
-----AGCCTTTTGCCTCTGCTCACCA----- mirR 22 1
-----GGTAGCCTTTTGCCTCTGCTC----- mirR 21 1
-----TAGCCTTTTGCCTCTGCTC----- mirR 19 1
-----ACCACACCTCATCACAC morR 18 7
-----CTGCTCACCACACCTCA----- morR 18 3
-----TCACCACACCTCATCAC-- morR 18 1
-----TGCTCACCACACCTCATCAC-- morR 21 1

```

>mmu-mir-540

```

GGACATTCCCTGGGGCTGGGCCAAGGGTCACCCTCTGACTCTGTGGCCAAGGGTAGACAGGTCAGAGGTCGATCCTGGGCCTACTCTGGGGCTCCTCCC species len reads
---CATTCCCTGGGGCTGGGC----- morL 18 7
--ACATTCCCTGGGGCTGGGC----- morL 19 6
---CATTCCCTGGGGCTGGGCC----- morL 19 1
-GACATTCCCTGGGGCTGGGC----- morL 20 1
-GACATTCCCTGGGGCTGGG----- morL 19 1
GGACATTCCCTGGGGCTGGGC----- morL 21 1
---ATTCCCTGGGGCTGGGCC----- morL 18 1
-----CAAGGGTCACCCTCTGACTCTGT----- mirL 23 1302
-----CAAGGGTCACCCTCTGACTCTG----- mirL 22 71
-----CAAGGGTCACCCTCTGACTCTGTG----- mirL 24 62
-----CAAGGGTCACCCTCTGACTCTGTGG----- mirL 25 52
-----CAAGGGTCACCCTCTGACTCT----- mirL 21 34
-----CAAGGGTCACCCTCTGACTCTGTGG----- mirL 26 17
-----AAGGGTCACCCTCTGACTCTGT----- mirL 22 10
-----CAAGGGTCACCCTCTGACT----- mirL 19 9
-----AAGGGTCACCCTCTGACTCTGTGG----- mirL 24 6
-----AGGGTCACCCTCTGACTC----- mirL 18 5
-----AAGGGTCACCCTCTGACT----- mirL 18 2
-----CCAAGGGTCACCCTCTGACTCTGT----- mirL 24 2
-----AAGGGTCACCCTCTGACTCTGTG----- mirL 23 1
-----CCAAGGGTCACCCTCTGA----- mirL 18 1
-----GCCAAGGGTCACCCTCTG----- mirL 18 1
-----GGCCAAGGGTCACCCTCTGACTCTGT----- mirL 26 1
-----AAGGGTCACCCTCTGACTCTGTGGCC----- mirL 26 1
-----AGGTCAGAGGTCGATCCTGG----- mirR 20 2223
-----AGGTCAGAGGTCGATCCTGGG----- mirR 21 1813
-----AGGTCAGAGGTCGATCCTGGGC----- mirR 22 1604
-----AGGTCAGAGGTCGATCCTGGGCC----- mirR 23 791

```

```

-----AGGTCAGAGGTCGATCCTGGGCCT----- mirR 24 545
-----AGGTCAGAGGTCGATCCTGGGCCTA----- mirR 25 462
-----AGGTCAGAGGTCGATCCTG----- mirR 19 194
-----GGTCAGAGGTCGATCCTGG----- mirR 19 59
-----CAGGTCAGAGGTCGATCCTGGGC----- mirR 23 34
-----CAGGTCAGAGGTCGATCCTGGG----- mirR 22 30
-----GTCAGAGGTCGATCCTGG----- mirR 18 23
-----CAGGTCAGAGGTCGATCCTGGGCCT----- mirR 25 8
-----CAGGTCAGAGGTCGATCCTGG----- mirR 21 7
-----TCAGAGGTCGATCCTGGG----- mirR 18 4
-----GGTCAGAGGTCGATCCTGGGCC----- mirR 22 4
-----GGTCAGAGGTCGATCCTGGGC----- mirR 21 3
-----GTCAGAGGTCGATCCTGGG----- mirR 19 2
-----ACAGGTCAGAGGTCGATC----- mirR 18 2
-----GGTCAGAGGTCGATCCTGGG----- mirR 20 1
-----CAGGTCAGAGGTCGATCCTG----- mirR 20 1
-----CAGGTCAGAGGTCGATCC----- mirR 18 1
-----GGTCAGAGGTCGATCCTGGGCCT----- mirR 23 1
-----CTACTCTGGGGCTCCTCC----- morR 18 1
-----GCCTACTCTGGGGCTCCT--- morR 18 1
-----TACTCTGGGGCTCCTCCC morR 18 1

```

>mmu-mir-344d-3

```

GAAGATTTTCATCAGTCAGGCTAGTGGTTATACTCCAGGACTTATCTGGTCTGGATATAACCAGTCCAGACTGAATGGTGCCTAAAGAGAAGGGAG species len reads
--AAGATTTTCATCAGTCAGG----- morL 18 2
GAAGATTTTCATCAGTCAG----- morL 18 2
-----TTCATCAGTCAGGCTAGT----- morL 18 1
-----ATTTTCATCAGTCAGGCTAGT----- morL 20 1
--AGATTTTCATCAGTCAGGC----- morL 18 1
---GATTTTCATCAGTCAGGCT----- morL 18 1
-----AGTGGTTATACTCCAGGA----- mirL 18 7
-----GCTAGTGGTTATACTCCA----- mirL 18 1
-----GTGGTTATACTCCAGGAC----- mirL 18 1
-----TAGTGGTTATACTCCAGGA----- mirL 19 1
-----GATATAACCACTGCCAGACTGA----- mirR 22 7497
-----GATATAACCACTGCCAGACTGAA----- mirR 23 1045
-----GATATAACCACTGCCAGACT----- mirR 20 212
-----GATATAACCACTGCCAGACTG----- mirR 21 166
-----GATATAACCACTGCCAGAC----- mirR 19 76
-----ATAACCACTGCCAGACTGA----- mirR 19 75
-----GATATAACCACTGCCAGACTGAAT----- mirR 24 59
-----ATAACCACTGCCAGACTGAA----- mirR 20 50
-----GGATATAACCACTGCCAGACTGA----- mirR 23 35
-----GATATAACCACTGCCAGA----- mirR 18 13
-----ATATAACCACTGCCAGAC----- mirR 18 9
-----ATATAACCACTGCCAGACTGA----- mirR 21 7

```

```

-----ATAACCACTGCCAGACTG----- mirR 18 4
-----ATATAACCACTGCCAGACTGAA----- mirR 22 4
-----ATATAACCACTGCCAGACTGAAT----- mirR 23 2
-----TGGATATAACCACTGCCAGAC----- mirR 21 2
-----CTGGATATAACCACTGCCAGA----- mirR 21 1
-----ATAACCACTGCCAGACTGAAT----- mirR 21 1
-----TGGATATAACCACTGCCA----- mirR 18 1
-----GGATATAACCACTGCCAGACTG----- mirR 22 1
-----AATGGTGCTAAAGAGAAG---- morR 18 3
-----GGTGCTAAAGAGAAGGGA- morR 18 2
-----ATGGTGCTAAAGAGAAGGGA- morR 20 1
-----GTGCTAAAGAGAAGGGAG morR 18 1
-----AATGGTGCTAAAGAGAAGGGA- morR 21 1

>mmu-mir-344d-1
TCTGCAGGGGAAGATTTTCATCAGTCAGGCTGCTGGCTATACACCAGGACTTATCTGGTCTGGATATAACCACTGCCAGACTGAAAGGTGCTAAAGAGAAGGGAG species len reads
----CAGGGGAAGATTTTCATCAGTC----- morL 21 1
TCTGCAGGGGAAGATTTCA----- morL 19 1
--TGCAGGGGAAGATTTTCATC----- morL 19 1
-----GTCAGGCTGCTGGCTATA----- mirL 18 4
-----AGTCAGGCTGCTGGCTATACACC----- mirL 23 2
-----GTCAGGCTGCTGGCTATAC----- mirL 19 1
-----AGGCTGCTGGCTATACAC----- mirL 18 1
-----AGTCAGGCTGCTGGCTAT----- mirL 18 1
-----TACACCAGGACTTATCTGGTC----- loop 21 1
-----GATATAACCACTGCCAGACTGA----- mirR 22 7497
-----GATATAACCACTGCCAGACTGAA----- mirR 23 1045
-----GATATAACCACTGCCAGACT----- mirR 20 212
-----GATATAACCACTGCCAGACTG----- mirR 21 166
-----GATATAACCACTGCCAGAC----- mirR 19 76
-----ATAACCACTGCCAGACTGA----- mirR 19 75
-----GATATAACCACTGCCAGACTGAAA----- mirR 24 57
-----ATAACCACTGCCAGACTGAA----- mirR 20 50
-----GGATATAACCACTGCCAGACTGA----- mirR 23 35
-----GATATAACCACTGCCAGA----- mirR 18 13
-----ATATAACCACTGCCAGAC----- mirR 18 9
-----ATATAACCACTGCCAGACTGA----- mirR 21 7
-----ATAACCACTGCCAGACTG----- mirR 18 4
-----ATATAACCACTGCCAGACTGAA----- mirR 22 4
-----TGGATATAACCACTGCCAGAC----- mirR 21 2
-----TGGATATAACCACTGCCA----- mirR 18 1
-----ATAACCACTGCCAGACTGAAA----- mirR 21 1
-----CTGGATATAACCACTGCCAGA----- mirR 21 1
-----GGATATAACCACTGCCAGACTG----- mirR 22 1
-----GGTGCTAAAGAGAAGGGA- morR 18 2
-----AGGTGCTAAAGAGAAGGG-- morR 18 1

```

-----GTGCTAAAGAGAAGGGAG morR 18 1

>mmu-mir-1959

```
GATTCAAAAGAAGAGGGCCGGGATGTAGCTCAGTGGAGGAGTCTTGCCCAAACAGGAAAGGCCCTGGGTTATATCCACGGCCCCACAAG species len reads
----CAAAAAGAAGAGGGCCGG----- morL 18 2
GATTCAAAAGAAGAGGGC----- morL 19 2
GATTCAAAAGAAGAGGG----- morL 18 1
--TCAAAAAGAAGAGGGCCG----- morL 18 1
--TCAAAAAGAAGAGGGCC----- morL 18 1
-----GGGGATGTAGCTCAGTGG----- mirL 18 7214
-----GGGGATGTAGCTCAGTGG----- mirL 19 1107
-----GGGGATGTAGCTCAGTGGAG----- mirL 20 388
-----GGGGATGTAGCTCAGTGGAGG----- mirL 21 230
-----GGGGATGTAGCTCAGTGGAGGA----- mirL 22 134
-----GGGGATGTAGCTCAGTGGAGGAG----- mirL 23 30
-----GGGGATGTAGCTCAGTGGAGGAGT----- mirL 24 21
-----GGGATGTAGCTCAGTGGAG----- mirL 19 16
-----GGGATGTAGCTCAGTGGAG----- mirL 18 13
-----GGGATGTAGCTCAGTGGAG----- mirL 20 10
-----GCCGGGGATGTAGCTCAG----- mirL 18 4
-----GGGATGTAGCTCAGTGGAGGA----- mirL 21 3
-----GATGTAGCTCAGTGGAGGA----- mirL 19 2
-----GATGTAGCTCAGTGGAGG----- mirL 18 2
-----GCCGGGGATGTAGCTCAGTGG----- mirL 21 2
-----CGGGGATGTAGCTCAGTG----- mirL 18 1
-----CGGGGATGTAGCTCAGTGGAGG----- mirL 22 1
-----CGGGGATGTAGCTCAGTGG----- mirL 19 1
-----GAGTCCTTGCCCAAACA----- loop 18 2
-----AGGAGTCCTTGCCCAAACA----- loop 18 1
-----CAGGAAAGGCCCTGGGTT----- mirR 18 17
-----AAACAGGAAAGGCCCTGG----- mirR 18 4
-----ACAGGAAAGGCCCTGGGTT----- mirR 18 2
-----ACAGGAAAGGCCCTGGGTTAT----- mirR 21 2
-----AGGAAAGGCCCTGGGTTA----- mirR 18 1
-----TATCCACGGCCCCACAAG morR 18 1
```

>mmu-mir-325

```
AGAGCCGATATAGTGCTTGGTTCCTAGTAGGTGCTCAGTAAGTGTGTTGTGACATAATTCGTTTATTGAGCACCTCCTATCAATCAAGCACTGTGCTAGGCTCTGGGGCCACATAGCTAAGTTAGACAAGATGCTCCCTTTT
-GAGCCGATATAGTGCTTGG-----
AGAGCCGATATAGTGCTTGG-----
---GCCGATATAGTGCTTGGTT-----
-----CCTAGTAGGTGCTCAGTAAGTGT-----
-----CCTAGTAGGTGCTCAGTAAGT-----
-----CCTAGTAGGTGCTCAGTAAG-----
-----CCTAGTAGGTGCTCAGTAAGTG-----
-----CCTAGTAGGTGCTCAGTAAG-----
```

```

-----AGTAGGTGCTCAGTAAGTGT-----
-----CTAGTAGGTGCTCAGTAAGTGT-----
-----CCTAGTAGGTGCTCAGTAAGTGT-----
-----TAGTAGGTGCTCAGTAAGTGT-----
-----CCTAGTAGGTGCTCAGTA-----
-----AGTAGGTGCTCAGTAAGTG-----
-----AGTAGGTGCTCAGTAAGT-----
-----TCCTAGTAGGTGCTCAGTAAGT-----
-----CTAGTAGGTGCTCAGTAAGTG-----
-----CTAGTAGGTGCTCAGTAAGT-----
-----TCCTAGTAGGTGCTCAGTAAGTGT-----
-----TAGTAGGTGCTCAGTAAG-----
-----AGTAGGTGCTCAGTAAGTGTTT-----
-----CTTTT-----
-----CTTTT-----
-----CCTTTT-----
-----CCTTTT-----

```

>mmu-mir-344-2

| CTGCAGCCAGGGTTTTTACCAGTCAGGCTCCTGGCTAGATTCCAGGTACCAACTGGTACCTGATCTAGCCAAAGCCTGACTGTAAGCTGCAAAAGAAAAGGAG | species | len | reads |
|---------------------------------------------------------------------------------------------------------|---------|-----|-------|
| ---CAGCCAGGGTTTTTACCA---                                                                                | morL    | 18  | 20    |
| ---CAGGGTTTTTACCAGTCA---                                                                                | morL    | 18  | 3     |
| --GCAGCCAGGGTTTTTACC---                                                                                 | morL    | 18  | 1     |
| CTGCAGCCAGGGTTTTTAC---                                                                                  | morL    | 19  | 1     |
| CTGCAGCCAGGGTTTTTACCA---                                                                                | morL    | 21  | 1     |
| ---AGCCAGGGTTTTTACCAG---                                                                                | morL    | 18  | 1     |
| -TGCAGCCAGGGTTTTTAC---                                                                                  | morL    | 18  | 1     |
| ---GCCAGGGTTTTTACCAGT---                                                                                | morL    | 18  | 1     |
| -----TCAGGCTCCTGGCTAGATTCCA-----                                                                        | mirL    | 22  | 39    |
| -----TCAGGCTCCTGGCTAGATTCCAG-----                                                                       | mirL    | 23  | 17    |
| -----TCAGGCTCCTGGCTAGATTC-----                                                                          | mirL    | 20  | 10    |
| -----GTCAGGCTCCTGGCTAGATTCC-----                                                                        | mirL    | 22  | 7     |
| -----AGTCAGGCTCCTGGCTAGATTCCA-----                                                                      | mirL    | 24  | 3     |
| -----TCAGGCTCCTGGCTAGATTCCAGG-----                                                                      | mirL    | 24  | 3     |
| -----AGTCAGGCTCCTGGCTAGATTCCAGGTACCAAC-----                                                             | mirL    | 33  | 3     |
| -----AGTCAGGCTCCTGGCTAGATTC-----                                                                        | mirL    | 23  | 3     |
| -----AGTCAGGCTCCTGGCTAGA-----                                                                           | mirL    | 19  | 2     |
| -----AGGCTCCTGGCTAGATTC-----                                                                            | mirL    | 18  | 1     |
| -----CAGTCAGGCTCCTGGCTAGAT-----                                                                         | mirL    | 21  | 1     |
| -----AGTCAGGCTCCTGGCTAG-----                                                                            | mirL    | 18  | 1     |
| -----TCAGGCTCCTGGCTAGATTCC-----                                                                         | mirL    | 21  | 1     |
| -----AGTCAGGCTCCTGGCTAGATTCCAG-----                                                                     | mirL    | 25  | 1     |
| -----TGATCTAGCCAAAGCCTGACTGT-----                                                                       | mirR    | 23  | 5971  |
| -----TGATCTAGCCAAAGCCTGACTG-----                                                                        | mirR    | 22  | 677   |
| -----GATCTAGCCAAAGCCTGACTGT-----                                                                        | mirR    | 22  | 489   |
| -----TGATCTAGCCAAAGCCTGACT-----                                                                         | mirR    | 21  | 236   |

```

-----TGATCTAGCCAAAGCCTGACTGTA----- mirR 24 160
-----TGATCTAGCCAAAGCCTGAC----- mirR 20 155
-----ATCTAGCCAAAGCCTGACTGT----- mirR 21 114
-----TCTAGCCAAAGCCTGACTGT----- mirR 20 112
-----CCTGATCTAGCCAAAGCCTGA----- mirR 21 112
-----TGATCTAGCCAAAGCCTGACTGTAA----- mirR 25 90
-----GATCTAGCCAAAGCCTGACTG----- mirR 21 69
-----TGATCTAGCCAAAGCCTGA----- mirR 19 49
-----ATCTAGCCAAAGCCTGACTG----- mirR 20 48
-----TCTAGCCAAAGCCTGACTG----- mirR 19 42
-----CCTGATCTAGCCAAAGCCTGAC----- mirR 22 21
-----GATCTAGCCAAAGCCTGAC----- mirR 19 19
-----GATCTAGCCAAAGCCTGACT----- mirR 20 18
-----GATCTAGCCAAAGCCTGACTGTA----- mirR 23 11
-----CCTGATCTAGCCAAAGCCTG----- mirR 20 10
-----GATCTAGCCAAAGCCTGA----- mirR 18 10
-----GATCTAGCCAAAGCCTGACTGTAA----- mirR 24 5
-----ACCTGATCTAGCCAAAGCCTGA----- mirR 22 5
-----ATCTAGCCAAAGCCTGAC----- mirR 18 4
-----ACCTGATCTAGCCAAAGC----- mirR 18 4
-----TCTAGCCAAAGCCTGACT----- mirR 18 3
-----CTGATCTAGCCAAAGCCTGAC----- mirR 21 1
-----CTGATCTAGCCAAAGCCTGA----- mirR 20 1
-----CTGATCTAGCCAAAGCCTGACT----- mirR 22 1
-----CCTGATCTAGCCAAAGCCTGACT----- mirR 23 1
-----ATCTAGCCAAAGCCTGACTGTA----- mirR 22 1
-----CCTGATCTAGCCAAAGCC----- mirR 18 1
-----TGTAAGCTGCAAAAAGAAA----- morR 18 2
-----AGCTGCAAAAAGAAAAGGAG morR 19 1
-----GCTGCAAAAAGAAAAGGAG morR 18 1

```

>mmu-mir-344-1

```

CTGCAGCCAGGGTTTTTACCAGTCAGGCTCCTGGCTAGATTCCAGGTACCAGCTGGTACCTGATCTAGCCAAAGCCTGACTGTAAGCCCTGAACACAAAGGAAGA species len reads
---CAGCCAGGGTTTTTACCA----- morL 18 20
-----CAGGGTTTTTACCAGTCA----- morL 18 3
CTGCAGCCAGGGTTTTTAC----- morL 19 1
--GCAGCCAGGGTTTTTACC----- morL 18 1
----GCCAGGGTTTTTACCAGT----- morL 18 1
-TGCAGCCAGGGTTTTTAC----- morL 18 1
---AGCCAGGGTTTTTACCAG----- morL 18 1
CTGCAGCCAGGGTTTTTACCA----- morL 21 1
-----TCAGGCTCCTGGCTAGATTCCA----- mirL 22 39
-----TCAGGCTCCTGGCTAGATTCCAG----- mirL 23 17
-----TCAGGCTCCTGGCTAGATTCC----- mirL 20 10
-----GTCAGGCTCCTGGCTAGATTCC----- mirL 22 7
-----TCAGGCTCCTGGCTAGATTCCAG----- mirL 24 3

```

```

-----AGTCAGGCTCCTGGCTAGATTCC----- mirL 23 3
-----AGTCAGGCTCCTGGCTAGATTCCA----- mirL 24 3
-----AGTCAGGCTCCTGGCTAGA----- mirL 19 2
-----AGTCAGGCTCCTGGCTAGATTCCAG----- mirL 25 1
-----AGGCTCCTGGCTAGATTCC----- mirL 18 1
-----AGTCAGGCTCCTGGCTAG----- mirL 18 1
-----CAGTCAGGCTCCTGGCTAGAT----- mirL 21 1
-----TCAGGCTCCTGGCTAGATTCC----- mirL 21 1
-----TGATCTAGCCAAAGCCTGACTGT----- mirR 23 5971
-----TGATCTAGCCAAAGCCTGACTG----- mirR 22 677
-----GATCTAGCCAAAGCCTGACTGT----- mirR 22 489
-----TGATCTAGCCAAAGCCTGACT----- mirR 21 236
-----TGATCTAGCCAAAGCCTGACTGTA----- mirR 24 160
-----TGATCTAGCCAAAGCCTGAC----- mirR 20 155
-----ATCTAGCCAAAGCCTGACTGT----- mirR 21 114
-----TCTAGCCAAAGCCTGACTGT----- mirR 20 112
-----CCTGATCTAGCCAAAGCCTGA----- mirR 21 112
-----TGATCTAGCCAAAGCCTGACTGTAA----- mirR 25 90
-----GATCTAGCCAAAGCCTGACTG----- mirR 21 69
-----TGATCTAGCCAAAGCCTGA----- mirR 19 49
-----ATCTAGCCAAAGCCTGACTG----- mirR 20 48
-----TCTAGCCAAAGCCTGACTG----- mirR 19 42
-----CCTGATCTAGCCAAAGCCTGAC----- mirR 22 21
-----GATCTAGCCAAAGCCTGAC----- mirR 19 19
-----GATCTAGCCAAAGCCTGACT----- mirR 20 18
-----GATCTAGCCAAAGCCTGACTGTA----- mirR 23 11
-----CCTGATCTAGCCAAAGCCTG----- mirR 20 10
-----GATCTAGCCAAAGCCTGA----- mirR 18 10
-----GATCTAGCCAAAGCCTGACTGTAA----- mirR 24 5
-----ACCTGATCTAGCCAAAGCCTGA----- mirR 22 5
-----ATCTAGCCAAAGCCTGAC----- mirR 18 4
-----ACCTGATCTAGCCAAAGC----- mirR 18 4
-----TCTAGCCAAAGCCTGACT----- mirR 18 3
-----CTGATCTAGCCAAAGCCTGA----- mirR 20 1
-----CCTGATCTAGCCAAAGCC----- mirR 18 1
-----CTGATCTAGCCAAAGCCTGAC----- mirR 21 1
-----CCTGATCTAGCCAAAGCCTGACT----- mirR 23 1
-----ATCTAGCCAAAGCCTGACTGTA----- mirR 22 1
-----CTGATCTAGCCAAAGCCTGACT----- mirR 22 1
-----CCCTGAACACAAAGGAAG----- morR 18 2
-----GTAAGCCCTGAACACAAA----- morR 18 2
-----AGCCCTGAACACAAAGGA----- morR 18 1
-----CCCTGAACACAAAGGAAGA----- morR 19 1

```

>mmu-mir-1939

TCAAGTCAAGGGGACCCCTTCGATTCCTGCCAATGCACTAAATGTAATGGTCTGGAAAATCTCTGAAGGAAGGCCTCAGACTTGGTATGCAAAACCAAGGATGTTTATTCTGA species len reads

```

-----CAAGTCAAGGGGGACCCC----- morL 18 4
-----AAGTCAAGGGGGACCCCT----- morL 18 1
-----GTCAAGGGGGACCCCTTC----- morL 18 1
TCAAGTCAAGGGGGACCC----- morL 18 1
-----TCGATTCCCTGCCAATGCACTA----- mirL 22 5398
-----TCGATTCCCTGCCAATGCAC----- mirL 20 1395
-----TCGATTCCCTGCCAATGCACT----- mirL 21 405
-----TCGATTCCCTGCCAATGCA----- mirL 19 317
-----CGATTCCCTGCCAATGCACTA----- mirL 21 279
-----TCGATTCCCTGCCAATGC----- mirL 18 134
-----CGATTCCCTGCCAATGCAC----- mirL 19 114
-----CGATTCCCTGCCAATGCACT----- mirL 20 59
-----GATTCCCTGCCAATGCAC----- mirL 18 41
-----ATTCCCTGCCAATGCACTA----- mirL 19 32
-----GATTCCCTGCCAATGCACTA----- mirL 20 31
-----TTCGATTCCCTGCCAATGCACTA----- mirL 23 13
-----TTCGATTCCCTGCCAATGCAC----- mirL 21 13
-----CGATTCCCTGCCAATGCA----- mirL 18 11
-----ATTCCCTGCCAATGCACT----- mirL 18 9
-----TTCGATTCCCTGCCAATGC----- mirL 19 6
-----TTCGATTCCCTGCCAATGCACT----- mirL 22 4
-----TTCGATTCCCTGCCAATGCA----- mirL 20 4
-----GATTCCCTGCCAATGCAC----- mirL 19 3
-----TTCGATTCCCTGCCAATGC----- mirL 18 1
-----TCAGACTTGGTATGCAAA----- mirR 18 106
-----TCAGACTTGGTATGCAAAAC----- mirR 20 16
-----TCAGACTTGGTATGCAAAA----- mirR 19 13
-----CAGACTTGGTATGCAAAAC----- mirR 19 1
-----GACTTGGTATGCAAAACC----- mirR 18 1
-----AGACTTGGTATGCAAAAC----- mirR 18 1
-----GCCTCAGACTTGGTATGC----- mirR 18 1
-----AAACCAAGGATGTTTAT----- morR 18 2
-----AAAGGATGTTTATCTGA----- morR 18 1

```

>mmu-mir-1927

```

AGAAACCAGAGTTGCAAGTGGCTGTGAACTGACCTCTGGATGTTAGGGACTGAACATGCATCCTCTCTCTACAAG species len reads
AGAAACCAGAGTTGCAAG----- mirL 18 21
---AACCAGAGTTGCAAGTGG----- mirL 18 1
--AAACCAGAGTTGCAAGTG----- mirL 18 1
-----GACCTCTGGATGTTAGGGACTGA----- mirR 23 6818
-----GACCTCTGGATGTTAGGGACTG----- mirR 22 463
-----GACCTCTGGATGTTAGGGACT----- mirR 21 420
-----ACCTCTGGATGTTAGGGACTGA----- mirR 22 143
-----GACCTCTGGATGTTAGGGACT----- mirR 20 119
-----GACCTCTGGATGTTAGGGA----- mirR 19 78
-----CCTCTGGATGTTAGGGACTGA----- mirR 21 52

```



```

-----CTCTGGATGTTAGGGACTGA----- mirR 20 43
-----GACCTCTGGATGTTAGGGACTGAA----- mirR 24 22
-----TGACCTCTGGATGTTAGGGACTGA----- mirR 24 16
-----GACCTCTGGATGTTAGGGACTGAAC----- mirR 25 10
-----CCTCTGGATGTTAGGGACTG----- mirR 20 6
-----ACCTCTGGATGTTAGGGACTG----- mirR 21 6
-----TGACCTCTGGATGTTAGGGACTG----- mirR 23 5
-----ACCTCTGGATGTTAGGGA----- mirR 18 4
-----CTCTGGATGTTAGGGACTG----- mirR 19 3
-----ACCTCTGGATGTTAGGGACT----- mirR 20 3
-----TGACCTCTGGATGTTAGGGAC----- mirR 21 1
-----ACCTCTGGATGTTAGGGACTGAA----- mirR 23 1
-----TGACCTCTGGATGTTAGGG----- mirR 19 1
-----CTGACCTCTGGATGTTAGG----- mirR 19 1
-----TGCATCCTCTCTCTACAA----- morR 18 3
-----ATGCATCCTCTCTCTACAAG----- morR 20 2
-----ACATGCATCCTCTCTCTA----- morR 18 1
-----GAACATGCATCCTCTCTC----- morR 18 1
-----ACATGCATCCTCTCTCTACA-- morR 20 1

```

>mmu-mir-3068

```

GACAGAGTATGCGAGAGTAATTGGAGTTCATGCAAGTTCTAACCAGCTTACTCAGTAGCTGGGTGAATTGCAGTACTCCAACATTCTGCTTCCATCTGCTCAGTTCTCATGCT species len reads
GACAGAGTATGCGAGAGTA----- morL 19 8
---AGAGTATGCGAGAGTAAT----- morL 18 1
---AGTATGCGAGAGTAATTG----- morL 18 1
---GAGTATGCGAGAGTAATT----- morL 18 1
-----TTGGAGTTCATGCAAGTTCTAACC----- mirL 24 1215
-----TTGGAGTTCATGCAAGTTCTA----- mirL 21 304
-----TTGGAGTTCATGCAAGTTCTAAC----- mirL 23 220
-----TTGGAGTTCATGCAAGTTCTAACCA----- mirL 25 157
-----TGGAGTTCATGCAAGTTCTAACC----- mirL 23 130
-----TTGGAGTTCATGCAAGTTCTAA----- mirL 22 130
-----TTGGAGTTCATGCAAGTTCT----- mirL 20 72
-----ATTGGAGTTCATGCAAGTTCTA----- mirL 22 59
-----TGGAGTTCATGCAAGTTCTAACCA----- mirL 24 43
-----TGGAGTTCATGCAAGTTCTAAC----- mirL 22 42
-----ATTGGAGTTCATGCAAGTTCTAACC----- mirL 25 39
-----TGGAGTTCATGCAAGTTCTA----- mirL 20 33
-----TGGAGTTCATGCAAGTTCTAA----- mirL 21 30
-----TTGGAGTTCATGCAAGTTCT----- mirL 19 30
-----ATTGGAGTTCATGCAAGTTCTAA----- mirL 23 14
-----TGGAGTTCATGCAAGTTCTAACCA----- mirL 25 10
-----ATTGGAGTTCATGCAAGTTCTAAC----- mirL 24 8
-----GAGTTCATGCAAGTTCTAACC----- mirL 21 6
-----GGAGTTCATGCAAGTTCTAACC----- mirL 22 5
-----ATTGGAGTTCATGCAAGTTCT----- mirL 21 5

```

```

-----TGGAGTTCATGCAAGTTCT----- mirL 19 5
-----ATTGGAGTTCATGCAAGTTCTAACCA----- mirL 26 4
-----ATTGGAGTTCATGCAAGT----- mirL 18 3
-----GGAGTTCATGCAAGTTCTAACCA----- mirL 23 1
-----GAGTTCATGCAAGTTCTA----- mirL 18 1
-----GCTTACTCAGTAGCTGGGT----- loop 19 1
-----CTTACTCAGTAGCTGGGT----- loop 18 1
-----GCTTACTCAGTAGCTGGG----- loop 18 1
-----GGTGAATTGCAGTACTCCAACA----- mirR 22 2715
-----GGTGAATTGCAGTACTCCAACAT----- mirR 23 1095
-----GTGAATTGCAGTACTCCAACA----- mirR 21 473
-----GGTGAATTGCAGTACTCCAAC----- mirR 21 251
-----GTGAATTGCAGTACTCCAACAT----- mirR 22 188
-----GAATTGCAGTACTCCAACATTC----- mirR 22 150
-----GGTGAATTGCAGTACTCCAA----- mirR 20 147
-----GGTGAATTGCAGTACTCCAACATT----- mirR 24 87
-----TGAATTGCAGTACTCCAACAT----- mirR 21 80
-----GGTGAATTGCAGTACTCCA----- mirR 19 61
-----TGAATTGCAGTACTCCAACATTC----- mirR 23 34
-----GTGAATTGCAGTACTCCAAC----- mirR 19 31
-----GTGAATTGCAGTACTCCAAC----- mirR 20 30
-----TGAATTGCAGTACTCCAACA----- mirR 20 27
-----GGTGAATTGCAGTACTCCAACATTC----- mirR 25 23
-----TGAATTGCAGTACTCCAACATT----- mirR 22 19
-----TGGGTGAATTGCAGTACTCCA----- mirR 21 16
-----GTGAATTGCAGTACTCCAACATTC----- mirR 23 15
-----GAATTGCAGTACTCCAACA----- mirR 19 15
-----TGGGTGAATTGCAGTACTCCAA----- mirR 22 14
-----TGGGTGAATTGCAGTACTCCAACA----- mirR 24 14
-----GGGTGAATTGCAGTACTCCAACA----- mirR 23 13
-----GAATTGCAGTACTCCAACAT----- mirR 20 9
-----GAATTGCAGTACTCCAACATTC----- mirR 23 9
-----GGGTGAATTGCAGTACTCCAACATTC----- mirR 26 8
-----CTGGGTGAATTGCAGTACTCCA----- mirR 22 8
-----GGGTGAATTGCAGTACTCCAA----- mirR 21 7
-----GAATTGCAGTACTCCAACATTC----- mirR 21 6
-----TGAATTGCAGTACTCCAA----- mirR 18 5
-----TGGGTGAATTGCAGTACTCCAACATTC----- mirR 27 5
-----CTGGGTGAATTGCAGTACTCC----- mirR 21 4
-----GTGAATTGCAGTACTCCA----- mirR 18 4
-----GTGAATTGCAGTACTCCAACATTC----- mirR 24 3
-----TGAATTGCAGTACTCCAAC----- mirR 19 3
-----TGAATTGCAGTACTCCAACATTC----- mirR 24 2
-----TGGGTGAATTGCAGTACTCCAAC----- mirR 23 2
-----TGGGTGAATTGCAGTACTC----- mirR 19 2
-----GAATTGCAGTACTCCAAC----- mirR 18 2

```

```

-----GGGTGAATTGCAGTACTCCA----- mirR 20 1
-----CTGCTTCCATCTGCTCAGTTCTCATGCT morR 28 15
-----ACATTCTGCTTCCATCTGCT----- morR 20 1

>mmu-mir-493
GGGCTCACTCTGGCCGCCAGGGCCTTGTACATGGTAGGCTTTTCATTCATTTTTTGCACATTCGGTGAAGGTCTACTGTGTGCCAGGCCCTGTGCCAGGCATCGTGTAGATGGA species len reads
GGGCTCACTCTGGCCGCCAGGGCC----- morL 24 5
-----CTCTGGCCGCCAGGGCCTT----- morL 19 3
---CTCACTCTGGCCGCCAGGGCC----- morL 21 2
-----CTGGCCGCCAGGGCCTTG----- morL 18 2
-----TCTGGCCGCCAGGGCCTTG----- morL 19 1
-----ACTCTGGCCGCCAGGGCC----- morL 18 1
---ACTCTGGCCGCCAGGGCCTTG----- morL 21 1
-----CACTCTGGCCGCCAGGGC----- morL 18 1
-----TTGTACATGGTAGGCTTTTCATT----- mirL 22 5207
-----TTGTACATGGTAGGCTTTTCATT----- mirL 23 756
-----TTGTACATGGTAGGCTTTTCAT----- mirL 21 580
-----TTGTACATGGTAGGCTTTCA----- mirL 20 469
-----TGTACATGGTAGGCTTTTCATT----- mirL 21 156
-----GTACATGGTAGGCTTTTCATT----- mirL 20 130
-----TTGTACATGGTAGGCTTTTC----- mirL 19 83
-----TTGTACATGGTAGGCTTTTCATTCA----- mirL 24 43
-----TTGTACATGGTAGGCTTTT----- mirL 18 36
-----TGTACATGGTAGGCTTTTCAT----- mirL 19 34
---TGTACATGGTAGGCTTTTCATT----- mirL 22 22
-----TGTACATGGTAGGCTTTTCAT----- mirL 20 14
-----CTTGTACATGGTAGGCTTTTCATT----- mirL 24 12
-----TACATGGTAGGCTTTTCATT----- mirL 19 8
---GTACATGGTAGGCTTTTCAT----- mirL 19 7
-----TACATGGTAGGCTTTTCATTCA----- mirL 21 5
-----GTACATGGTAGGCTTTTCAT----- mirL 18 5
-----TGTACATGGTAGGCTTTTC----- mirL 18 3
-----CTTGTACATGGTAGGCTTTTCATT----- mirL 23 2
-----TGTACATGGTAGGCTTTTCATTCA----- mirL 23 1
-----GCCTTGTACATGGTAGGC----- mirL 18 1
-----GTACATGGTAGGCTTTTCATT----- mirL 21 1
-----ATTCATTTTTTGCACATT----- loop 18 3
-----ATTTTTTGCACATTCGGT----- loop 18 1
-----TGAAGGTCTACTGTGTGCCAG----- mirR 22 159
-----TGAAGGTCTACTGTGTGCCAGG----- mirR 23 144
-----TGAAGGTCTACTGTGTGCCAGGC----- mirR 24 65
-----TGAAGGTCTACTGTGTGCCA----- mirR 21 25
-----TGAAGGTCTACTGTGTGCCAGGCC----- mirR 25 24
-----TGAAGGTCTACTGTGTG----- mirR 18 14
-----TGAAGGTCTACTGTGTGCCAGGCC----- mirR 26 12
-----CGGTGAAGGTCTACTGTGTGCC----- mirR 23 7

```

```

-----GAAGGTCCTACTGTGTGC-----mirR 18 6
-----GAAGGTCCTACTGTGTGCCAGGCC-----mirR 24 5
-----GAAGGTCCTACTGTGTGCCAG-----mirR 21 3
-----GAAGGTCCTACTGTGTGCCAGGCC-----mirR 25 3
-----GAAGGTCCTACTGTGTGCCAGG-----mirR 22 3
-----CGGTGAAGGTCCTACTGT-----mirR 18 2
-----AAGGTCCTACTGTGTGCCA-----mirR 19 2
-----GAAGGTCCTACTGTGTGCCAGGC-----mirR 23 2
-----AAGGTCCTACTGTGTGCCAG-----mirR 20 1
-----AAGGTCCTACTGTGTGCCAGG-----mirR 21 1
-----GAAGGTCCTACTGTGTGCCA-----mirR 20 1
-----AGGTCCTACTGTGTGCCAGG-----mirR 20 1
-----CCCTGTGCCAGGCATCGTGTAGATGGA morR 27 9
-----AGGCCCTGTGCCAGGCATC-----morR 19 1
-----GCCCTGTGCCAGGCATCG-----morR 18 1

```

>mmu-mir-146b

```

GAGAACTTTGGCCACCTGGCTCTGAGAACTGAATTCATAGGCTGTGAGCTCTAGCAGACGCCCTAGGGACTCAGTTCTGGTGTGCCGGCTGTGCTATAACCATCAAC species len reads
GAGAACTTTGGCCACCTGGCTC-----morL 22 1
----ACTTTGGCCACCTGGCTC-----morL 18 1
-----TGAGAACTGAATTCATAGGCTGT-----mirL 24 4108
-----TGAGAACTGAATTCATAGGCT-----mirL 22 943
-----TGAGAACTGAATTCATAGGCTG-----mirL 23 522
-----TGAGAACTGAATTCATAGGCTGTG-----mirL 25 390
-----TGAGAACTGAATTCATAGGCTGTGA-----mirL 26 271
-----TGAGAACTGAATTCATAGGC-----mirL 21 253
-----TGAGAACTGAATTCATAG-----mirL 19 245
-----GAGAACTGAATTCATAGGCTGT-----mirL 23 210
-----AGAACTGAATTCATAGGCT-----mirL 20 46
-----GAACTGAATTCATAGGCT-----mirL 19 45
-----GAGAACTGAATTCATAGGCT-----mirL 21 43
-----GAGAACTGAATTCATAGGCTG-----mirL 22 39
-----GAGAACTGAATTCATAGGCTGTG-----mirL 24 31
-----GAGAACTGAATTCATAGGCTGTGA-----mirL 25 27
-----GAGAACTGAATTCATAGGC-----mirL 20 21
-----GAGAACTGAATTCATAG-----mirL 18 20
-----GAACTGAATTCATAGGCTGT-----mirL 21 14
-----AGAACTGAATTCATAGGCTGT-----mirL 22 14
-----CTGAGAACTGAATTCATAGGC-----mirL 22 10
-----CTGAGAACTGAATTCATAGGCT-----mirL 23 6
-----CTGAGAACTGAATTCATAG-----mirL 20 2
-----AGAACTGAATTCATAGGCTG-----mirL 21 2
-----GAACTGAATTCATAGGCTGTGAG-----mirL 24 1
-----CTGAGAACTGAATTCATAGG-----mirL 21 1
-----TGAGCTCTAGCAGACGCC-----loop 18 1
-----GCCCTAGGGACTCAGTTCTGGT-----mirR 22 649

```

```

-----GCCCTAGGGACTCAGTTCTGGTG----- mirR 23 51
-----GCCCTAGGGACTCAGTTCTGG----- mirR 21 44
-----GCCCTAGGGACTCAGTTCTGGTGC----- mirR 24 12
-----GCCCTAGGGACTCAGTTCTGGTGCC----- mirR 25 9
-----GCCCTAGGGACTCAGTTCTG----- mirR 20 5
-----GCCCTAGGGACTCAGTTC----- mirR 18 4
-----CCCTAGGGACTCAGTTCT----- mirR 18 3
-----CGCCCTAGGGACTCAGTTCTG----- mirR 21 3
-----CCCTAGGGACTCAGTTCTGGTGC----- mirR 23 3
-----CCTAGGGACTCAGTTCTGGTGC----- mirR 22 3
-----CCCTAGGGACTCAGTTCTGGTG----- mirR 22 2
-----CCCTAGGGACTCAGTTCTGG----- mirR 20 2
-----CCTAGGGACTCAGTTCTGG----- mirR 19 1
-----CGCCCTAGGGACTCAGTT----- mirR 18 1
-----CGCCCTAGGGACTCAGTTCTGGT----- mirR 23 1
-----CCCTAGGGACTCAGTTCTG----- mirR 19 1
-----CGGCTGTGCTATAACCATC--- morR 18 2
-----CGGCTGTGCTATAACCATCAAC morR 21 2
-----GGTGCCCGGCTGTGCTATA----- morR 19 1

```

>mmu-mir-1949

```

GCTGGGAGAACAGCAGCCAATAGCTGGTTGGCATTCTGGGCCTGGTTTCATGCCACCTCTGTGTTAACTATAACCAGGATGTCAGCATAGTTGC species len reads
---GGAGAACAGCAGCCAATAG----- morL 19 5
---GGAGAACAGCAGCCAATA----- morL 18 3
GCTGGGAGAACAGCAGCCAATA----- morL 22 3
---GGGAGAACAGCAGCCAATA----- morL 19 3
---GAGAACAGCAGCCAATAG----- morL 18 2
---GGGAGAACAGCAGCCAAT----- morL 18 1
---GAGAACAGCAGCCAATAGC----- morL 19 1
-CTGGGAGAACAGCAGCCAATAG----- morL 22 1
-CTGGGAGAACAGCAGCCAAT----- morL 20 1
---GGGAGAACAGCAGCCAATAG----- morL 20 1
-----AGCTGGTTGGCATTCTGGGCCTGGTT----- mirL 26 3
-----GCTGGTTGGCATTCTGGGCCTGGTTTCATGCCACC----- mirL 34 1
-----AGCTGGTTGGCATTCTGG----- mirL 18 1
-----AGCTGGTTGGCATTCTGGGCCTGG----- mirL 24 1
-----CTATACCAGGATGTCAGCATAGTT-- mirR 24 2868
-----TATACCAGGATGTCAGCATAGTT-- mirR 23 1569
-----CTATACCAGGATGTCAGCATAG--- mirR 22 1377
-----CTATACCAGGATGTCAGCATAGT--- mirR 23 829
-----CTATACCAGGATGTCAGCATA---- mirR 21 410
-----TATACCAGGATGTCAGCATAGTTG- mirR 24 202
-----ATACCAGGATGTCAGCATAGTT-- mirR 22 178
-----TATACCAGGATGTCAGCATAGT--- mirR 22 149
-----TATACCAGGATGTCAGCATAG--- mirR 21 55
-----CTATACCAGGATGTCAGCA----- mirR 19 42

```

```
-----ATACCAGGATGTCAGCATAG--- mirR 20 40
-----TACCAGGATGTCAGCATAGTT-- mirR 21 33
-----ACTATAACCAGGATGTCAGCATAGTT-- mirR 25 32
-----CTATAACCAGGATGTCAGCATAGTTG- mirR 25 27
-----ACTATAACCAGGATGTCAGCATAGT--- mirR 24 21
-----TATAACCAGGATGTCAGCATA----- mirR 20 20
-----AACTATAACCAGGATGTCAGCATAGTT-- mirR 26 18
-----CTATAACCAGGATGTCAGCAT----- mirR 20 15
-----AACTATAACCAGGATGTCAGCATAGT--- mirR 25 14
-----TATAACCAGGATGTCAGCA----- mirR 18 14
-----TACCAGGATGTCAGCATA----- mirR 18 12
-----ATACCAGGATGTCAGCATAGT--- mirR 21 11
-----TACCAGGATGTCAGCATAG--- mirR 19 11
-----ATACCAGGATGTCAGCATAGTTG- mirR 23 11
-----ATACCAGGATGTCAGCATA----- mirR 19 10
-----ACTATAACCAGGATGTCAGCATAGTTG- mirR 26 7
-----TACCAGGATGTCAGCATAGT--- mirR 20 3
-----TATAACCAGGATGTCAGCAT----- mirR 19 2
-----AACTATAACCAGGATGTCAGCA----- mirR 21 2
-----TAACTATAACCAGGATGTCAGCATAGTT-- mirR 27 1
-----TAACTATAACCAGGATGTCAGCATAG--- mirR 25 1
-----AACTATAACCAGGATGTCAGCAT----- mirR 22 1
-----ATACCAGGATGTCAGCATAGTTGC- mirR 24 1
-----TAACTATAACCAGGATGTCAG----- mirR 20 1
-----AACTATAACCAGGATGTCAGCATAG--- mirR 24 1
-----AACTATAACCAGGATGTCAGCATAGTTG- mirR 27 1
-----ACTATAACCAGGATGTCAG----- mirR 18 1
-----ACTATAACCAGGATGTCAGCAT----- mirR 21 1
-----AACTATAACCAGGATGTCA----- mirR 18 1

>mmu-mir-196b
CAGCATCAGAACTGGTCGGTGATTTAGGTAGTTTCTGTTGTTGGGATCCACCTTTCTCTCGACAGCACGACACTGCCTTCATTACTTCAGTTGAAAGCATCTCCAGGTACCTGTCCAGAGCAGCCCGG species le
--GCATCAGAACTGGTCGGTGATT----- morL 22 15
----TCAGAACTGGTCGGTGAT----- morL 18 7
----CAGAACTGGTCGGTGATT----- morL 18 3
CAGCATCAGAACTGGTCGGTG----- morL 21 3
---CATCAGAACTGGTCGGTGATT----- morL 21 2
----TCAGAACTGGTCGGTGATT----- morL 19 2
--GCATCAGAACTGGTCGGTGA----- morL 20 2
--GCATCAGAACTGGTCGGTG----- morL 19 1
--GCATCAGAACTGGTCGGTGATT----- morL 23 1
--AGCATCAGAACTGGTCGGTGATT----- morL 23 1
CAGCATCAGAACTGGTCGGTGA----- morL 22 1
---CATCAGAACTGGTCGGTG----- morL 18 1
--GCATCAGAACTGGTCGGTGAT----- morL 21 1
-----TAGGTAGTTTCTGTTGTTGGG----- mirL 22 332
```

```

-----TAGGTAGTTTCCTGTTGTTGGGA----- mirL 23 189
-----TAGGTAGTTTCCTGTTGTTGG----- mirL 21 729
-----TAGGTAGTTTCCTGTTGTTGGGAT----- mirL 24 189
-----AGGTAGTTTCCTGTTGTTGGG----- mirL 21 92
-----TAGGTAGTTTCCTGTTGTTGGGATC----- mirL 25 71
-----TAGGTAGTTTCCTGTTGTTGG----- mirL 20 70
-----TAGGTAGTTTCCTGTTGTTGGGATCC----- mirL 26 47
-----AGGTAGTTTCCTGTTGTTGGGA----- mirL 22 23
-----GGTAGTTTCCTGTTGTTGGGAT----- mirL 22 17
-----AGGTAGTTTCCTGTTGTTGG----- mirL 19 12
-----GGTAGTTTCCTGTTGTTGG----- mirL 18 10
-----GGTAGTTTCCTGTTGTTGG----- mirL 19 6
-----AGGTAGTTTCCTGTTGTTGGGATCC----- mirL 25 5
-----GGTAGTTTCCTGTTGTTGGG----- mirL 20 4
-----AGGTAGTTTCCTGTTGTTGG----- mirL 20 4
-----AGGTAGTTTCCTGTTGTTGGGATC----- mirL 24 4
-----TTAGGTAGTTTCCTGTTG----- mirL 18 3
-----ATTTAGGTAGTTTCCTGT----- mirL 18 2
-----AGGTAGTTTCCTGTTGTTGGGAT----- mirL 23 2
-----TTAGGTAGTTTCCTGTTGTTGG----- mirL 23 1
-----TTGAAAGCATCTCCAGGT----- mirR 18 142
-----GAAAGCATCTCCAGGTAC----- mirR 18 2
-----GTTGAAAGCATCTCCAGGT----- mirR 19 1
-----TGAAGCATCTCCAGGTA----- mirR 18 1
-----AGTTGAAAGCATCTCCAG----- mirR 18 1
-----TTGAAAGCATCTCCAGGTA----- mirR 19 1
-----AAAGCATCTCCAGGTACCTGT----- mirR 21 1
-----TGAAGCATCTCCAGGTACCTGT----- mirR 23 1
-----TACCTGTCCAGAGCAGCC--- morR 18 3
-----TACCTGTCCAGAGCAGCCC-- morR 19 1
-----CTGTCCAGAGCAGCCCG morR 18 1
-----CCTGTCCAGAGCAGCCCG- morR 18 1
-----GTACCTGTCCAGAGCAGC--- morR 18 1
-----CCTGTCCAGAGCAGCCCG morR 19 1
-----ACCTGTCCAGAGCAGCCC-- morR 18 1

```

>mmu-mir-1930

```

TGGACCACATGCCCACGGTACCTCCATAGTACCTGCAGCGTGCTTGACTTTCTCTATGGTGCAGTTACTGTGGCTGTGGCTGTGTTTCGTGCCTCAGACTG species len reads
TGGACCACATGCCCACGG----- morL 18 8
--GGACCACATGCCCACGGT----- morL 18 4
---ACCACATGCCCACGGTCA----- morL 18 2
-----ACCTCCATAGTACCTGCAGCGT----- mirL 22 5500
-----ACCTCCATAGTACCTGCAGCG----- mirL 21 807
-----ACCTCCATAGTACCTGCAGC----- mirL 20 417
-----ACCTCCATAGTACCTGCAG----- mirL 19 224
-----ACCTCCATAGTACCTGCAGCGT----- mirL 23 170

```

```

-----ACCTCCATAGTACCTGCAGCGTGC----- mirL 24 114
-----CCTCCATAGTACCTGCAGCGT----- mirL 21 85
-----ACCTCCATAGTACCTGCA----- mirL 18 70
-----TCCATAGTACCTGCAGCGT----- mirL 19 50
-----CTCCATAGTACCTGCAGCGT----- mirL 20 47
-----CCTCCATAGTACCTGCAGCG----- mirL 20 40
-----CTCCATAGTACCTGCAGCG----- mirL 19 36
-----TCCATAGTACCTGCAGCG----- mirL 18 29
-----CTCCATAGTACCTGCAGC----- mirL 18 10
-----CCTCCATAGTACCTGCAGC----- mirL 19 10
-----TCACCTCCATAGTACCTGCAGC----- mirL 22 7
-----TCACCTCCATAGTACCTGCAGCGTG----- mirL 25 4
-----CACCTCCATAGTACCTGCAGCG----- mirL 22 4
-----CCTCCATAGTACCTGCAGCGTG----- mirL 22 3
-----TCACCTCCATAGTACCTGCAGCGT----- mirL 24 2
-----CCTCCATAGTACCTGCAGCGTGC----- mirL 23 1
-----CCTCCATAGTACCTGCAG----- mirL 18 1
-----GCTTGACTTTCTCTATGG----- loop 18 1
-----CTTGACTTTCTCTATGGT----- loop 18 1
-----GGTGCAGTFACTGTGGCTGTGG----- mirR 22 70
-----GGTGCAGTFACTGTGGCTGTGGC----- mirR 23 7
-----GGTGCAGTFACTGTGGCTGTGGCT----- mirR 24 5
-----GGTGCAGTFACTGTGGCTGTGGCTG----- mirR 25 4
-----TGGTGCAGTFACTGTGGCTGTGG----- mirR 23 4
-----GGTGCAGTFACTGTGGCTGTG----- mirR 21 4
-----GGTGCAGTFACTGTGGCTGT----- mirR 20 3
-----TGGTGCAGTFACTGTGGCTGT----- mirR 21 2
-----TGCAGTFACTGTGGCTGTGG----- mirR 20 2
-----TGGTGCAGTFACTGTGGCTGTG----- mirR 22 2
-----GGTGCAGTFACTGTGGCTGTGGCTGT----- mirR 26 1
-----GCAGTFACTGTGGCTGTG----- mirR 18 1
-----TGCAGTFACTGTGGCTGTGGCTG----- mirR 23 1
-----TGGTGCAGTFACTGTGGCTGTGGCT----- mirR 25 1
-----TGCAGTFACTGTGGCTGT----- mirR 18 1
-----TGTTCGTGCCTCAGACTG morR 18 3
-----TGTGTTTCGTGCCTCAGAC-- morR 18 1
-----TGGCTGTGTTTCGTGCCTC----- morR 18 1

```

>mmu-mir-203

```

TGTGTGCAGGCGCGCCTGGTCCAGTGGTTCCTTGACAGTTCAACAGTTCTGTAGCACAATTGTGAAATGTTTAGGACCACTAGACCCGGCGCGCACGGCGGCGACGACAGCAGCGAC species len reads
----GCAGGCGCGCCTGGTCCA----- morL 18 3
--TGTGCAGGCGCGCCTGGT----- morL 18 2
---GTGCAGGCGCGCCTGGT----- morL 18 1
TGTGTGCAGGCGCGCCTGG----- morL 19 1
TGTGTGCAGGCGCGCCTGGTCC----- morL 22 1
---GTGCAGGCGCGCCTGGTCC----- morL 19 1

```



```

-----AGTGGTTCCTTGACAGTTCAACA----- mirL 22 994
-----GTGGTTCCTTGACAGTTCAACA----- mirL 21 38
-----GGTTCCTTGACAGTTCAACA----- mirL 19 37
-----AGTGGTTCCTTGACAGTTCAAC----- mirL 21 28
-----AGTGGTTCCTTGACAGTTCAACAG----- mirL 23 22
-----AGTGGTTCCTTGACAGTTCA----- mirL 19 10
-----AGTGGTTCCTTGACAGTTCAACAGT----- mirL 24 7
-----AGTGGTTCCTTGACAGTTCAA----- mirL 20 7
-----CAGTGGTTCCTTGACAGTTC----- mirL 19 1
-----TGGTTCCTTGACAGTTCAACA----- mirL 20 1
-----TGGTTCCTTGACAGTTCAA----- mirL 18 1
-----TCCAGTGGTTCCTTGACAG----- mirL 18 1
-----CAGTGGTTCCTTGACAGTTCAA----- mirL 21 1
-----CAGTTCGTAGCACAATT----- loop 18 2
-----CAGTTCGTAGCACAATTG----- loop 19 1
-----GTGAAATGTTTAGGACCACTAG----- mirR 22 3075
-----TGAAATGTTTAGGACCACTAG----- mirR 21 1877
-----GTGAAATGTTTAGGACCACTA----- mirR 21 492
-----TGAAATGTTTAGGACCACTA----- mirR 20 378
-----GTGAAATGTTTAGGACCACTAGA----- mirR 23 221
-----GAAATGTTTAGGACCACTAG----- mirR 20 108
-----GTGAAATGTTTAGGACCACT----- mirR 20 86
-----TGAAATGTTTAGGACCACT----- mirR 19 85
-----TGAAATGTTTAGGACCACTAGA----- mirR 22 79
-----GTGAAATGTTTAGGACCA----- mirR 18 30
-----TGTGAAATGTTTAGGACCACTAG----- mirR 23 27
-----GAAATGTTTAGGACCACTA----- mirR 19 17
-----GAAATGTTTAGGACCACTAGA----- mirR 21 11
-----GTGAAATGTTTAGGACCAC----- mirR 19 10
-----TGAAATGTTTAGGACCACTAGAC----- mirR 23 8
-----GAAATGTTTAGGACCACT----- mirR 18 5
-----AAATGTTTAGGACCACTA----- mirR 18 4
-----GTGAAATGTTTAGGACCACTAGAC----- mirR 24 4
-----TTGTGAAATGTTTAGGACCACTAG----- mirR 24 3
-----TGTGAAATGTTTAGGACCACT----- mirR 21 3
-----TGAAATGTTTAGGACCACT----- mirR 18 3
-----TGTGAAATGTTTAGGACCACTA----- mirR 22 2
-----TGAAATGTTTAGGACCACTAGACC----- mirR 24 2
-----AAATGTTTAGGACCACTAG----- mirR 19 2
-----TGTGAAATGTTTAGGACCACTAGA----- mirR 24 1
-----ACCCGGCGCGCACGGCGGCGA----- morR 21 1
-----ACCCGGCGCGCACGGCGG----- morR 18 1
-----CCCGGCGCGCACGGCGGC----- morR 18 1
-----ACCCGGCGCGCACGGCGGCGACAGCAGCAGCGAC morR 34 1
-----CCGGCGCGCACGGCGGCGA----- morR 19 1

```

```

>mmu-mir-211
TGGACCTGTGACCTGTGGGCTTCCCTTTGTCATCCTTTGCCTAGGCCTCTGAGTGAGGCAAGGACAGCAAAGGGGGGCTCAGTGGTCACCTCTACTGCA species len reads
-GGACCTGTGACCTGTGGG-----morL 18 2
----CCTGTGACCTGTGGGCTTC-----morL 19 1
TGGACCTGTGACCTGTGGGC-----morL 20 1
---ACCTGTGACCTGTGGGCT-----morL 18 1
----CCTGTGACCTGTGGGCTT-----morL 18 1
-----TTCCCTTTGTCATCCTTTGCCT-----mirL 22 6066
-----TTCCCTTTGTCATCCTTTGCC-----mirL 21 444
-----TTCCCTTTGTCATCCTTTGC-----mirL 20 248
-----TTCCCTTTGTCATCCTTTGCCTA-----mirL 23 209
-----TTCCCTTTGTCATCCTTTG-----mirL 19 154
-----TCCCTTTGTCATCCTTTGCCT-----mirL 21 148
-----TTCCCTTTGTCATCCTTTGCCTAG-----mirL 24 84
-----TTCCCTTTGTCATCCTTT-----mirL 18 47
-----CCTTTGTCATCCTTTGCCT-----mirL 19 44
-----CCCTTTGTCATCCTTTGCCT-----mirL 20 27
-----TCCCTTTGTCATCCTTTGC-----mirL 19 19
-----TCCCTTTGTCATCCTTTGCCTA-----mirL 22 9
-----TCCCTTTGTCATCCTTTG-----mirL 18 9
-----TCCCTTTGTCATCCTTTGCC-----mirL 20 4
-----TCCCTTTGTCATCCTTTGCCTAG-----mirL 23 3
-----CTTCCCTTTGTCATCCTTTGCCT-----mirL 23 3
-----CCTTTGTCATCCTTTGCC-----mirL 18 2
-----CCCTTTGTCATCCTTTGCC-----mirL 19 2
-----CCTTTGTCATCCTTTGCCTA-----mirL 20 1
-----CCCTTTGTCATCCTTTGC-----mirL 18 1
-----GCTTCCCTTTGTCATCCT-----mirL 18 1
-----TCCCTTTGTCATCCTTTGCCTAG-----mirL 24 1
-----GGCTTCCCTTTGTCATCCTTTGCCTA-----mirL 26 1
-----CCTCTGAGTGAGGCAAGG-----loop 18 3
-----GCCTCTGAGTGAGGCAAG-----loop 18 2
-----CCTAGGCCTCTGAGTGAG-----loop 18 1
-----AGGCCTCTGAGTGAGGCA-----loop 18 1
-----AGGACAGCAAAGGGGGG-----mirR 18 26
-----GCAAGGACAGCAAAGGGGG-----mirR 20 11
-----GCAAGGACAGCAAAGGGGGGCTC-----mirR 23 7
-----GCAAGGACAGCAAAGGGGGGC-----mirR 21 4
-----GCAAGGACAGCAAAGGGGGGCTCA-----mirR 24 3
-----GCAAGGACAGCAAAGGGGG-----mirR 19 3
-----GCAAGGACAGCAAAGGGGGCT-----mirR 22 2
-----GACAGCAAAGGGGGGCTC-----mirR 18 1
-----CAAGGACAGCAAAGGGGGCT-----mirR 21 1
-----AAGGACAGCAAAGGGGG-----mirR 18 1
-----GCAAGGACAGCAAAGGGG-----mirR 18 1
-----GGCTCAGTGGTCACCTCTAC-----morR 20 9

```

```
-----TCAGTGGTCACCTCTACTGCA morR 21 6
-----GCTCAGTGGTCACCTCTAC---- morR 19 1
-----TCAGTGGTCACCTCTACT--- morR 18 1
-----GGCTCAGTGGTCACCTCTACTG-- morR 22 1
```

>mmu-mir-874

```
TTTGGGTGTAGCCCTGCGGCCCCACGCACCAGGGTAAGAGAGACTCACTTCCTGCCCTGGCCCCGAGGGACCGACTGGCTGGGCCTGCTTTCTGC species len reads
TTTGGGTGTAGCCCTGCGG----- morL 19 2
-----CGGCCCCACGCACCAGGGTAAGA----- mirL 23 110
-----CGGCCCCACGCACCAGGGTAAG----- mirL 22 27
-----GGCCCCACGCACCAGGGTAAGA----- mirL 22 23
-----CGGCCCCACGCACCAGGGTAAGAG----- mirL 24 14
-----GCCCCACGCACCAGGGTAAGA----- mirL 21 8
-----CGGCCCCACGCACCAGGGTA----- mirL 20 5
-----CGGCCCCACGCACCAGGGTAA----- mirL 21 3
-----GGCCCCACGCACCAGGGT----- mirL 18 2
-----CTGCGGCCCCACGCACCA----- mirL 18 1
-----TGCGGCCCCACGCACCAG----- mirL 18 1
-----CGGCCCCACGCACCAGGGT----- mirL 19 1
-----AGAGAGACTCACTTCCTG----- loop 18 1
-----CTGCCCTGGCCCCGAGGGACCGA----- mirR 22 3254
-----CTGCCCTGGCCCCGAGGGACCGAC----- mirR 23 2503
-----CTGCCCTGGCCCCGAGGGACCG----- mirR 21 879
-----CTGCCCTGGCCCCGAGGGACCGACT----- mirR 24 293
-----CTGCCCTGGCCCCGAGGGACC----- mirR 20 112
-----CTGCCCTGGCCCCGAGGGAC----- mirR 19 79
-----TGCCCTGGCCCCGAGGGACCGA----- mirR 21 56
-----CTGCCCTGGCCCCGAGGGACCGACTG----- mirR 25 39
-----GCCCTGGCCCCGAGGGACCGA----- mirR 20 21
-----TGCCCTGGCCCCGAGGGACCGACT----- mirR 23 10
-----CCCTGGCCCCGAGGGACCGAC----- mirR 20 8
-----CCCTGGCCCCGAGGGACCGA----- mirR 19 6
-----TGCCCTGGCCCCGAGGGACCGAC----- mirR 22 5
-----GCCCTGGCCCCGAGGGACCG----- mirR 19 5
-----CCTGCCCTGGCCCCGAGGGACCGA----- mirR 23 5
-----TGCCCTGGCCCCGAGGGACCG----- mirR 20 4
-----CCCTGGCCCCGAGGGACCG----- mirR 18 2
-----TGCCCTGGCCCCGAGGGAC----- mirR 18 1
-----GCCCTGGCCCCGAGGGACC----- mirR 18 1
-----CCTGCCCTGGCCCCGAGGG----- mirR 18 1
-----GGCTGGGCCTGCTTTCTGC morR 19 1
-----TGGCTGGGCCTGCTTTCT-- morR 18 1
-----CTGGCTGGGCCTGCTTTCT-- morR 19 1
-----ACTGGCTGGGCCTGCTTT-- morR 18 1
```

>mmu-mir-215

```

GCATCAACGGTGTACAGGAGAATGACCTATGATTTGACAGACCGTGCAGCTGTGTATGTCTGTCTGTCATTCTGTAGGCCAATATTCTGTATGTCAC TGCTACTTAAAAATCCGGACATCGGCAAACACCCTCTGAGCGCTGTGCA
--ATCAACGGTGTACAGGAG-----
GCATCAACGGTGTACAGGAG-----
-----ATGACCTATGATTTGACAGAC-----
-----ATGACCTATGATTTGACAGA-----
-----ATGACCTATGATTTGACA-----
-----ATGACCTATGATTTGACAG-----
-----ATGACCTATGATTTGACAGACC-----
-----TGACCTATGATTTGACAGAC-----
-----GACCTATGATTTGACAGAC-----
-----ACCTATGATTTGACAGAC-----
-----ATGACCTATGATTTGACAGACCG-----
-----AATGACCTATGATTTGACAGAC-----
-----TGACCTATGATTTGACAGA-----
-----GACCTATGATTTGACAGA-----
-----TGACCTATGATTTGACAG-----
-----AATGACCTATGATTTGACA-----
-----AATGACCTATGATTTGAC-----
-----ACCTATGATTTGACAGACCGT-----
-----TGACCTATGATTTGACAGACCG-----
-----AGAATGACCTATGATTTG-----
-----AATGACCTATGATTTGACAGA-----
-----ATGACCTATGATTTGACAGACCGT-----
-----
-----ATCCGGACATCGGCAAAC-----
-----TCCGGACATCGGCAAACA-----
-----AATCCGGACATCGGCAA-----
-----ACACCCTCTGAGCGCTGTG-----
-----ACCCTCTGAGCGCTGTGCA-----
-----CCCTCTGAGCGCTGTGCA-----

```

>mmu-mir-687

| Sequence                                                                                                        | species | len | reads |
|-----------------------------------------------------------------------------------------------------------------|---------|-----|-------|
| ATAGTCTGACACACATTTTACACTATCCTGGAATGCAGCAATGAATCCTGGGTTATTGTTTCAGTCTGTCTGTCATTGTATCTTGGAAAGTGATACAAACCAGTTTAGTTG | morL    | 19  | 4     |
| ----TCTGACACACATTTTACAC-----                                                                                    | morL    | 18  | 2     |
| ---GTCTGACACACATTTTAC---                                                                                        | morL    | 19  | 1     |
| ATAGTCTGACACACATTTT-----                                                                                        | morL    | 18  | 1     |
| -----GACACACATTTTACACTA-----                                                                                    | morL    | 22  | 1     |
| ATAGTCTGACACACATTTTACA-----                                                                                     | mirL    | 22  | 6167  |
| -----CTATCCTGGAATGCAGCAATGA-----                                                                                | mirL    | 21  | 597   |
| -----CTATCCTGGAATGCAGCAATG-----                                                                                 | mirL    | 20  | 239   |
| -----CTATCCTGGAATGCAGCAAT-----                                                                                  | mirL    | 19  | 96    |
| -----TCCTGGAATGCAGCAATGA-----                                                                                   | mirL    | 20  | 93    |
| -----ATCCTGGAATGCAGCAATGA-----                                                                                  | mirL    | 19  | 53    |
| -----CTATCCTGGAATGCAGCAA-----                                                                                   | mirL    | 18  | 29    |
| -----CTATCCTGGAATGCAGCA-----                                                                                    | mirL    | 19  | 26    |
| -----ATCCTGGAATGCAGCAATG-----                                                                                   | mirL    | 23  | 21    |
| -----CTATCCTGGAATGCAGCAATGAA-----                                                                               |         |     |       |

```

-----TATCCTGGAATGCAGCAATGA----- mirL 21 18
-----TCCTGGAATGCAGCAATG----- mirL 18 12
-----TATCCTGGAATGCAGCAATG----- mirL 20 9
-----ATCCTGGAATGCAGCAAT----- mirL 18 2
-----ACTATCCTGGAATGCAGCAATGA----- mirL 23 2
-----CTATCCTGGAATGCAGCAATGAAT----- mirL 24 1
-----ATCCTGGAATGCAGCAATGAAT----- mirL 22 1
-----TATCCTGGAATGCAGCAAT----- mirL 19 1
-----CACTATCCTGGAATGCAGCAATGA----- mirL 24 1
-----TTGTATCTTGGAAAGTG----- mirR 18 4
-----TTGTATCTTGGAAAGTGA----- mirR 19 2
-----ATTGTATCTTGGAAAGTG----- mirR 19 1
-----GTATCTTGGAAAGTGAT----- mirR 18 1
-----TCATGTATCTTGGAAAG----- mirR 19 1
-----CATTGTATCTTGGAAAG----- mirR 18 1
-----ATTGTATCTTGGAAAGT----- mirR 18 1
-----TACAAACCAGTTTAGTTT----- morR 18 2
-----ATACAAACCAGTTTAGTT----- morR 18 1
-----ACAAACCAGTTTAGTTTG----- morR 18 1

```

>mmu-mir-367

```

ACCAAGGCCGTCACTGTTGCTAACATGCAACTCTGTTGAATAGAAATTGGAATTGCACTTTAGCAATGGTGTATGGACCTGTGTCAGTGGCCACTTACTTGGACAGC species len reads
ACCAAGGCCGTCACTGTTGC----- morL 20 9
-CCAAGGCCGTCACTGTTG----- morL 18 2
-CCAAGGCCGTCACTGTTGC----- morL 19 2
---AGGCCGTCACTGTTGCTAA----- morL 19 1
---GGCCGTCACTGTTGCTAA----- morL 18 1
---AAGGCCGTCACTGTTGCTAA----- morL 20 1
ACCAAGGCCGTCACTGTTG----- morL 19 1
---AAGGCCGTCACTGTTGCT----- morL 18 1
---AGGCCGTCACTGTTGCTA----- morL 18 1
-----TAACATGCAACTCTGTTG----- mirL 18 43
-----AACATGCAACTCTGTTGA----- mirL 18 2
-----ACATGCAACTCTGTTGAA----- mirL 18 1
-----ATTGCACTTTAGCAATGGTGA----- mirR 21 3167
-----AATTGCACTTTAGCAATGGTGA----- mirR 22 2204
-----AATTGCACTTTAGCAATGGTG----- mirR 21 500
-----AATTGCACTTTAGCAATGGTGAT----- mirR 23 350
-----AATTGCACTTTAGCAATGGTGATG----- mirR 24 254
-----ATTGCACTTTAGCAATGGTGAT----- mirR 22 224
-----AATTGCACTTTAGCAATGGT----- mirR 20 171
-----GAATTGCACTTTAGCAATGGTGA----- mirR 23 139
-----ATTGCACTTTAGCAATGGTG----- mirR 20 64
-----AATTGCACTTTAGCAATGG----- mirR 19 26
-----AATTGCACTTTAGCAATGGTGATGG----- mirR 25 22
-----GAATTGCACTTTAGCAATGGTG----- mirR 22 20

```

```

-----ATTGCACTTTAGCAATGGTGAT----- mirR 23 19
-----GAATTGCACTTTAGCAATGGTGAT----- mirR 24 13
-----ATTGCACTTTAGCAATGGT----- mirR 19 11
-----TGCACCTTTAGCAATGGTG----- mirR 18 10
-----GCACCTTTAGCAATGGTGA----- mirR 18 9
-----GGAATTGCACTTTAGCAATGGTG----- mirR 23 8
-----ATTGCACTTTAGCAATGG----- mirR 18 6
-----TGCACCTTTAGCAATGGTGA----- mirR 19 5
-----TTGCACTTTAGCAATGGTGAT----- mirR 22 3
-----ATTGCACTTTAGCAATGGTGATGAC----- mirR 26 3
-----GCACCTTTAGCAATGGTGAT----- mirR 19 3
-----GAATTGCACTTTAGCAATGGT----- mirR 21 2
-----GAATTGCACTTTAGCAATGG----- mirR 20 1
-----GAATTGCACTTTAGCAATGGTGATG----- mirR 25 1
-----TTGCACTTTAGCAATGGTG----- mirR 19 1
-----TTGCACTTTAGCAATGGT----- mirR 18 1
-----TGGACCTGTGTCAGTGGCCACTTACTTGGACAGC morR 34 18
-----TGGACCTGTGTCAGTGGCCACTT----- morR 23 6
-----TGGACCTGTGTCAGTGGCCACTTACTT----- morR 27 5
-----TGGACCTGTGTCAGTGGCCACTTACTTGGAC--- morR 31 5
-----TGGACCTGTGTCAGTGGCCACT----- morR 22 4
-----TGGACCTGTGTCAGTGGCCAC----- morR 21 4
-----TGGACCTGTGTCAGTGGCC----- morR 19 3
-----ATGGACCTGTGTCAGTGG----- morR 18 2
-----ACCTGTGTCAGTGGCCAC----- morR 18 2
-----ACCTGTGTCAGTGGCCACTTAC----- morR 22 2
-----GATGGACCTGTGTCAGTGG----- morR 18 2
-----GGACCTGTGTCAGTGGCCACTTACTTGGACAGC morR 33 1
-----ACCTGTGTCAGTGGCCACTTA----- morR 21 1
-----ATGGACCTGTGTCAGTGGCCAC----- morR 22 1

>mmu-mir-692-2
CCATCTGACCAACCTCCGCAGGGTGGCAGGGCCACAACCAGCGCAGACTGGCGCGCCCCAGGGATCTCTGGGCGAGTATCTCTTTGAGCGCCTCACTCTCAAGCAGGACTAGGAGGCCTCTGTGCCTTCCAAGGG speci
-----CAGGGTGGCAGGGCCACA----- morL
-----TCCGCAGGGTGGCAGGGC----- morL
-----CCGCAGGGTGGCAGGGCCACAA----- morL
-----AGGGTGGCAGGGCCACAA----- morL
-----GCAGGGTGGCAGGGCCAC----- morL
-----CGCAGGGTGGCAGGGCCAC----- morL
CCATCTGACCAACCTCCGCAGGGTGGCAGGGCC----- morL
-----ACCTCCGCAGGGTGGCAGGGCCACA----- morL
-----AACCTCCGCAGGGTGGCAGGGCCACAA----- morL
-----ACCTCCGCAGGGTGGCAGGGCC----- morL
-----CAGGGTGGCAGGGCCACAA----- morL
-----CAACCAGCGCAGACTGGC----- mirL
-----ACCAGCGCAGACTGGCGCGCCCCA----- mirL

```

```
-----ACCAGCGCAGACTGGCGCGCCCCAGGGATCTC----- mirL
-----ACCAGCGCAGACTGGCGCGCCCCAGGGATCTCTGG----- mirL
-----ACCAGCGCAGACTGGCGC----- mirL
-----CCAGCGCAGACTGGCGCGCCCCAGGGAT----- mirL
-----CCACAACCAGCGCAGACT----- mirL
-----ACCAGCGCAGACTGGCGCGCCCCAGGGAT----- mirL
-----CCACAACCAGCGCAGACTGGCGCG----- mirL
-----AACCAGCGCAGACTGGCGCGCCCCAGGGATCTC----- mirL
-----AACCAGCGCAGACTGGCG----- mirL
-----CCACAACCAGCGCAGACTGGCGCGCC----- mirL
-----ACCAGCGCAGACTGGCGCGCCCCAGGGATCT----- mirL
-----GGCGCGCCCCAGGGATCTCTGGGCGAGTATC----- loop
-----CGCCCCAGGGATCTCTGGGCGAGTA----- loop
-----ATCTCTTTGAGCGCCTCACTC----- mirR
-----ATCTCTTTGAGCGCCTCACT----- mirR
-----TCTCTTTGAGCGCCTCACTC----- mirR
-----CTCTTTGAGCGCCTCACTC----- mirR
-----ATCTCTTTGAGCGCCTCAC----- mirR
-----ATCTCTTTGAGCGCCTCACTCT----- mirR
-----TATCTCTTTGAGCGCCTCACTC----- mirR
-----ATCTCTTTGAGCGCCTCACTCTCAAGCACGAC----- mirR
-----ATCTCTTTGAGCGCCTCA----- mirR
-----TCTCTTTGAGCGCCTCACT----- mirR
-----TCTTTGAGCGCCTCACTC----- mirR
-----ATCTCTTTGAGCGCCTCACTCTCAAGCAC----- mirR
-----TATCTCTTTGAGCGCCTCACT----- mirR
-----CTCTTTGAGCGCCTCACT----- mirR
-----CTCTTTGAGCGCCTCACTCTCAAGCACG----- mirR
-----TCTCTTTGAGCGCCTCACTCTCAAGCA----- mirR
-----TCTTTGAGCGCCTCACTCTC----- mirR
-----CTCTTTGAGCGCCTCACTCTCA----- mirR
-----TATCTCTTTGAGCGCCTCACTCTCA----- mirR
-----CTCTTTGAGCGCCTCACTCTCAAGCACGA----- mirR
-----AGTATCTCTTTGAGCGCCT----- mirR
-----CAAGCACGACTAGGAGGCCTCT----- morR
-----AAGCACGACTAGGAGGCCTCTGT----- morR
-----AGCACGACTAGGAGGCCT----- morR
-----AGCACGACTAGGAGGCCTC----- morR
-----AGCACGACTAGGAGGCCTCTGTGCCTT----- morR
-----AGCACGACTAGGAGGCCTCTGTGCCT----- morR
-----TCAAGCACGACTAGGAGGCC----- morR
-----CAAGCACGACTAGGAGGCCTCTG----- morR
-----AGCACGACTAGGAGGCCTCTG----- morR
-----CAAGCACGACTAGGAGGCCTC----- morR
-----TCTCAAGCACGACTAGGA----- morR
-----AGCACGACTAGGAGGCCTCTGTGCCTTCCAAGG morR
```

```

-----CTCTCAAGCAGACTAGG----- morR
-----AAGCACGACTAGGAGGCCTCTG----- morR
-----CTCTCAAGCAGACTAGGAGGCCTCTGTGCCT----- morR
-----CTCAAGCAGACTAGGAGGC----- morR
-----AGCACGACTAGGAGGCCTCT----- morR
-----CAAGCACGACTAGGAGGCCT----- morR
-----AAGCACGACTAGGAGGCC----- morR
-----TCTCAAGCAGACTAGGAGGCCTCT----- morR

```

>mmu-mir-466f-1

| Species | len | reads |
|---------|-----|-------|
| morL    | 21  | 31    |
| morL    | 22  | 26    |
| morL    | 18  | 5     |
| morL    | 22  | 4     |
| morL    | 19  | 3     |
| morL    | 20  | 2     |
| morL    | 21  | 2     |
| morL    | 19  | 1     |
| morL    | 23  | 1     |
| morL    | 21  | 1     |
| morL    | 22  | 1     |
| morL    | 21  | 1     |
| morL    | 20  | 1     |
| mirL    | 22  | 1772  |
| mirL    | 24  | 203   |
| mirL    | 21  | 107   |
| mirL    | 23  | 62    |
| mirL    | 23  | 40    |
| mirL    | 20  | 39    |
| mirL    | 22  | 25    |
| mirL    | 19  | 16    |
| mirL    | 22  | 12    |
| mirL    | 21  | 11    |
| mirL    | 25  | 8     |
| mirL    | 21  | 2     |
| mirL    | 23  | 1     |
| mirL    | 23  | 1     |
| mirL    | 18  | 1     |
| mirL    | 20  | 1     |
| mirR    | 22  | 2664  |
| mirR    | 21  | 715   |
| mirR    | 20  | 334   |
| mirR    | 23  | 255   |
| mirR    | 21  | 210   |
| mirR    | 23  | 83    |



```

-----TACACATACACACACATACA----- mirR 22 69
-----CATACACATACACACACATA----- mirR 22 64
-----CATACACATACACACACACAT----- mirR 21 59
-----TACACATACACACACACATA----- mirR 20 40
-----ATACACATACACACACAC----- mirR 18 35
-----ATACACATACACACACACA----- mirR 19 23
-----ACACATACACACACACATAC----- mirR 20 22
-----ACATACACATACACACACACAT----- mirR 22 17
-----TACACATACACACACACAT----- mirR 19 8
-----ACATACACATACACACACAC----- mirR 20 7
-----CACATACACACACACATACAC----- mirR 21 7
-----ATACACATACACACACACATACAC----- mirR 24 7
-----CATACACATACACACACACA----- mirR 20 6
-----ACATACACATACACACACACA----- mirR 21 5
-----ACACATACACACACACATA----- mirR 19 5
-----CATACACATACACACACAC----- mirR 19 5
-----ACATACACATACACACACATA----- mirR 23 4
-----CATACACATACACACACACATA----- mirR 24 3
-----ACACATACACACACACACAT----- mirR 18 2
-----ACACATACACACACACATACAC----- mirR 22 2
-----ACACATACACACACACATACA----- mirR 21 2
-----ACATACACATACACACACA----- mirR 19 2
-----CACATACACACACACATACA----- mirR 20 1
-----TACACATACACACACACATACAC----- mirR 23 1
-----TACACATACACACACACA----- mirR 18 1
-----ACATACACATACACACAC----- mirR 18 1
-----CATACACATACACACACATACACACATGC----- mirR 33 1
-----TACATACACATACACACACAC----- mirR 21 1
-----ACATACACATACACACACATACACA----- mirR 27 1
-----ACACACACATGCAACACACACA----- morR 22 4
-----ACACACACATGCAACACACAC----- morR 21 4
-----ACACACACATGCAACACACA----- morR 20 3
-----ACACACATGCAACACACAC----- morR 19 3
-----TACACACACATGCAACACACAC----- morR 22 2
-----ACACACACATGCAACACAC----- morR 19 1
-----CACACATGCAACACACAC----- morR 18 1
-----TACACACACATGCAACAC----- morR 18 1

>mmu-mir-692-1
CCATCTGACCAACCTCCGCAGGGTGGCAGGGCCACAACCAGCGCAGACTGGCGCGCCCCAGGGATCTCTGGGTGAGTATCTCTTTGAGCGCCTCACTCTCAAGCACAACCTAGGAGGCCT species len reads
-----CAGGGTGGCAGGGCCACA----- morL 18 14
-----TCCGCAGGGTGGCAGGGC----- morL 18 4
-----CCGCAGGGTGGCAGGGCCACAA----- morL 22 3
-----AGGGTGGCAGGGCCACAA----- morL 18 3
-----GCAGGGTGGCAGGGCCAC----- morL 18 2
CCATCTGACCAACCTCCGCAGGGTGGCAGGGCC----- morL 33 1

```

```

-----ACCTCCGCAGGGTGGCAGGGCC----- morL 22 1
-----ACCTCCGCAGGGTGGCAGGGCCACA----- morL 25 1
-----AACCTCCGCAGGGTGGCAGGGCCACAA----- morL 27 1
-----CAGGGTGGCAGGGCCACAA----- morL 19 1
-----CGCAGGGTGGCAGGGCCAC----- morL 19 1
-----CAACCAGCGCAGACTGGC----- mirL 18 25
-----ACCAGCGCAGACTGGCGCGCCCA----- mirL 24 9
-----ACCAGCGCAGACTGGCGCGCCCCAGGGATCTC----- mirL 32 5
-----ACCAGCGCAGACTGGCGC----- mirL 18 2
-----ACCAGCGCAGACTGGCGCGCCCCAGGGATCTCTGG----- mirL 35 2
-----CCACAACCAGCGCAGACT----- mirL 18 1
-----CCACAACCAGCGCAGACTGGCGCGCC----- mirL 26 1
-----AACCAGCGCAGACTGGCGCGCCCCAGGGATCTC----- mirL 33 1
-----CCACAACCAGCGCAGACTGGCGCG----- mirL 24 1
-----ACCAGCGCAGACTGGCGCGCCCCAGGGATCT----- mirL 31 1
-----CCAGCGCAGACTGGCGCGCCCCAGGGAT----- mirL 28 1
-----AACCAGCGCAGACTGGCG----- mirL 18 1
-----ACCAGCGCAGACTGGCGCGCCCCAGGGAT----- mirL 29 1
-----ATCTCTTTGAGCGCCTCACTC----- mirR 21 5350
-----ATCTCTTTGAGCGCCTCACT----- mirR 20 1338
-----TCTCTTTGAGCGCCTCACTC----- mirR 20 85
-----CTCTTTGAGCGCCTCACTC----- mirR 19 52
-----ATCTCTTTGAGCGCCTCAC----- mirR 19 27
-----ATCTCTTTGAGCGCCTCACTCT----- mirR 22 25
-----TATCTCTTTGAGCGCCTCACTC----- mirR 22 19
-----ATCTCTTTGAGCGCCTCA----- mirR 18 12
-----TCTCTTTGAGCGCCTCACT----- mirR 19 9
-----TCTTTGAGCGCCTCACTC----- mirR 18 8
-----ATCTCTTTGAGCGCCTCACTCTCAAGCAC----- mirR 29 6
-----CTCTTTGAGCGCCTCACT----- mirR 18 3
-----TATCTCTTTGAGCGCCTCACT----- mirR 21 3
-----TCTTTGAGCGCCTCACTCTC----- mirR 20 1
-----TCTCTTTGAGCGCCTCACTCTCAAGCA----- mirR 27 1
-----CTCTTTGAGCGCCTCACTCTCAAGCACA----- mirR 28 1
-----AGTATCTCTTTGAGCGCCT----- mirR 19 1
-----TATCTCTTTGAGCGCCTCACTCTCA----- mirR 25 1
-----CTCTTTGAGCGCCTCACTCTCA----- mirR 22 1
-----CTCTCAAGCACAAGTAGG----- morR 18 3
-----TCAAGCACAAGTAGGAGGCCT----- morR 21 1
-----CTCTCAAGCACAAGTAGGA----- morR 19 1
-----TCTCAAGCACAAGTAGGA----- morR 18 1

```

>mmu-mir-463

```

AAGGTATGATGTACCTGCTTTACCTAATTTGTTGTCCATCATGTAAAACATAAATGATGATAGACACCATATAAGGTAGAGGAAGGTTCA species len reads
AAGGTATGATGTACCTG----- morL 18 3
-----TGATGTACCTGCTTTAC----- morL 18 2

```

```

-AGGTATGATGTACCCTGC----- morL 18 1
-----TACCTAATTTGTTGTCCATCA----- mirL 21 3587
-----TACCTAATTTGTTGTCCATC----- mirL 20 1134
-----TACCTAATTTGTTGTCCATCAT----- mirL 22 984
-----TACCTAATTTGTTGTCCA----- mirL 18 333
-----TACCTAATTTGTTGTCCAT----- mirL 19 314
-----TACCTAATTTGTTGTCCATCATG----- mirL 23 209
-----CCTAATTTGTTGTCCATCA----- mirL 19 90
-----ACCTAATTTGTTGTCCATCA----- mirL 20 61
-----ACCTAATTTGTTGTCCATC----- mirL 19 40
-----TACCTAATTTGTTGTCCATCATGTA----- mirL 25 15
-----CTAATTTGTTGTCCATCA----- mirL 18 11
-----CCTAATTTGTTGTCCATC----- mirL 18 8
-----ACCTAATTTGTTGTCCATCATG----- mirL 22 5
-----ACCTAATTTGTTGTCCAT----- mirL 18 5
-----TTACCTAATTTGTTGTCCATC----- mirL 21 3
-----TTACCTAATTTGTTGTCCATCA----- mirL 22 2
-----ACCTAATTTGTTGTCCATCAT----- mirL 21 1
-----TTTACCTAATTTGTTGTCC----- mirL 19 1
-----ATAAATGATGATAGACAC----- mirR 18 181
-----ATAAATGATGATAGACACC----- mirR 19 9
-----ATAAATGATGATAGACACCA----- mirR 20 7
-----CATAAATGATGATAGACA----- mirR 18 3
-----AAATGATGATAGACACCA----- mirR 18 3
-----TAAATGATGATAGACACC----- mirR 18 3
-----ATAAGGTAGAGGAAGGTTCA morR 20 1
-----ATATAAGGTAGAGGAAGG--- morR 18 1

```

>mmu-mir-1224

```

GACTACCTGCCTCTGGTGAGGACTGGGGAGGTGGAGGGTAGCATCATTAGAGCCAGAGCTCTGTCTCAGCTCCCTCTCCCCACCTCTTCTCTCCTCAGGTACGACTGCAAGAGGCAC species len reads
GACTACCTGCCTCTGGTG----- morL 18 1
-----GTGAGGACTGGGGAGGTGGAG----- mirL 21 2322
-----GTGAGGACTGGGGAGGTGG----- mirL 19 853
-----GTGAGGACTGGGGAGGTGGA----- mirL 20 134
-----TGAGGACTGGGGAGGTGGAG----- mirL 20 106
-----GTGAGGACTGGGGAGGTG----- mirL 18 54
-----GAGGACTGGGGAGGTGGAG----- mirL 19 46
-----GGTGAGGACTGGGGAGGTGGAG----- mirL 22 33
-----AGGACTGGGGAGGTGGAG----- mirL 18 30
-----CTGGTGAGGACTGGGGAG----- mirL 18 10
-----GTGAGGACTGGGGAGGTGGAGGGTAG----- mirL 26 8
-----GTGAGGACTGGGGAGGTGGAGGGTAGC----- mirL 27 8
-----GAGGACTGGGGAGGTGGA----- mirL 18 7
-----TGAGGACTGGGGAGGTGGA----- mirL 19 5
-----GTGAGGACTGGGGAGGTGGAG----- mirL 22 4
-----AGGACTGGGGAGGTGGAGGG----- mirL 20 2

```

```

-----TGGTGAGGACTGGGGAGG----- mirL 18 2
-----TGAGGACTGGGGAGGTGG----- mirL 18 1
-----GGTGAGGACTGGGGAGGTGGA----- mirL 21 1
-----GGTGAGGACTGGGGAGGTG----- mirL 19 1
-----GGTGAGGACTGGGGAGGTGG----- mirL 20 1
-----AGGACTGGGGAGGTGGAG----- mirL 19 1
-----CCCCACCTCTTCTCTCCTCAG----- mirR 21 2618
-----CCCCACCTCTTCTCTCCTCA----- mirR 20 277
-----CCCACCTCTTCTCTCCTCAG----- mirR 20 94
-----CCCCACCTCTTCTCTCCTCAGG----- mirR 22 51
-----CCCCACCTCTTCTCTCCTC----- mirR 19 38
-----CCACCTCTTCTCTCCTCAG----- mirR 19 25
-----CCCCACCTCTTCTCTCCT----- mirR 18 17
-----CCCACCTCTTCTCTCCTCAG----- mirR 21 9
-----CCCACCTCTTCTCTCCTCAGGTA----- mirR 23 9
-----CACCTCTTCTCTCCTCAG----- mirR 18 8
-----CCCCACCTCTTCTCTCCTC----- mirR 20 5
-----TCCCCCACCTCTTCTCT----- mirR 18 5
-----CCCACCTCTTCTCTCCTCA----- mirR 19 5
-----CCACCTCTTCTCTCCTCAGGT----- mirR 22 4
-----TCCCCCACCTCTTCTCTC----- mirR 19 3
-----CCCCACCTCTTCTCTCCTCAG----- mirR 22 3
-----CCCCACCTCTTCTCTCCTCAGGT----- mirR 23 3
-----CCCCACCTCTTCTCTCCT----- mirR 19 3
-----CCCCCACCTCTTCTCTC----- mirR 18 2
-----CCCCACCTCTTCTCTCC----- mirR 18 2
-----CCCACCTCTTCTCTCCTC----- mirR 18 1
-----CAGGTACGACTGCAAGAGGCAC morR 22 2
-----CAGGTACGACTGCAAGAG---- morR 18 1
-----CAGGTACGACTGCAAGAGGCA- morR 21 1

```

>mmu-mir-504

```

TTGAAACTGCTCCTGTTGGGAGACCCTGGTCTGCACTCTATCTGTAACTTACTGAAGGGAGAGCAGGGCAGGGTTTCCATACAGAGGGCACAGG species len reads
TTGAAACTGCTCCTGTTG----- morL 18 1
-----CTGCTCCTGTTGGGAGAC----- morL 18 1
--GAAACTGCTCCTGTTGGG----- morL 18 1
-----GACCCTGGTCTGCACTCTATC----- mirL 21 2553
-----GACCCTGGTCTGCACTCTATCT----- mirL 22 981
-----AGACCCTGGTCTGCACTCTAT----- mirL 21 947
-----GACCCTGGTCTGCACTCTAT----- mirL 20 676
-----AGACCCTGGTCTGCACTCTATC----- mirL 22 462
-----AGACCCTGGTCTGCACTCTA----- mirL 20 200
-----AGACCCTGGTCTGCACTCTATCT----- mirL 23 183
-----GACCCTGGTCTGCACTCTA----- mirL 19 54
-----GACCCTGGTCTGCACTCTATCTGT----- mirL 24 31
-----ACCCTGGTCTGCACTCTATC----- mirL 20 24

```

```

-----ACCCTGGTCTGCACTCTAT----- mirL 19 17
-----CCCTGGTCTGCACTCTAT----- mirL 18 17
-----GACCCTGGTCTGCACTCT----- mirL 18 16
-----CCCTGGTCTGCACTCTATC----- mirL 19 13
-----ACCCTGGTCTGCACTCTA----- mirL 18 10
-----AGACCCTGGTCTGCACTCT----- mirL 19 8
-----GACCCTGGTCTGCACTCTATCTG----- mirL 23 7
-----AGACCCTGGTCTGCACTC----- mirL 18 3
-----CCTGGTCTGCACTCTATC----- mirL 18 2
-----GAGACCCTGGTCTGCACTCTATC----- mirL 23 1
-----GAGACCCTGGTCTGCACTCTA----- mirL 21 1
-----CTGTAAACTTACTGAAG----- loop 18 1
-----ATCTGTAAACTTACTGAAG----- loop 19 1
-----AGGGAGAGCAGGGCAGGGTTTC----- mirR 22 34
-----AGGGAGAGCAGGGCAGGGTTT----- mirR 21 28
-----GGGAGAGCAGGGCAGGGTTTC----- mirR 21 27
-----AGGGAGAGCAGGGCAGGGTTTCC----- mirR 23 20
-----GGGAGAGCAGGGCAGGGTTTCC----- mirR 22 8
-----GGGAGAGCAGGGCAGGGTTTCCCA----- mirR 24 8
-----AGGGAGAGCAGGGCAGGGTTTCCC----- mirR 24 5
-----AAGGGAGAGCAGGGCAGGGTTTCC----- mirR 24 5
-----AGGGAGAGCAGGGCAGGGTTTCCCA----- mirR 25 5
-----GGGAGAGCAGGGCAGGGTTTCCC----- mirR 23 3
-----AGGGAGAGCAGGGCAGGGTT----- mirR 20 2
-----GGGAGAGCAGGGCAGGGTTTCCCAT----- mirR 25 2
-----GGAGAGCAGGGCAGGGTTTC----- mirR 20 2
-----GGAGAGCAGGGCAGGGTTT----- mirR 19 2
-----TGAAGGGAGAGCAGGGCA----- mirR 18 2
-----GGGAGAGCAGGGCAGGGT----- mirR 18 1
-----AGGGAGAGCAGGGCAGGGTTTCCATA----- mirR 27 1
-----GAGAGCAGGGCAGGGTTT----- mirR 18 1
-----GAAGGGAGAGCAGGGCAG----- mirR 18 1
-----GAGAGCAGGGCAGGGTTTC----- mirR 19 1
-----GGAGAGCAGGGCAGGGTT----- mirR 18 1
-----TTCCCATACAGAGGGCAC--- morR 18 17
-----TCCCATACAGAGGGCAC--- morR 18 10
-----CCCATACAGAGGGCACAG- morR 18 3
-----TTCCCATACAGAGGGCAC--- morR 19 1
-----CCCATACAGAGGGCACAGG morR 19 1

```

>mmu-mir-761

```

GCATTTGGCAGGATGGCAAGTGGAGGAGCAGCAGGGTGAAACTGACACAGTGTCTGGTGAGTTTCACTTTGCTGCTCCTCTGACTCCCAGGGAGAGTTCTGTCTTTCTGTGGCAAGCTTCTCCAAGTGAATC specie
-----ATGGCAAGTGGAGGAGCA----- morL 1
GCATTTGGCAGGATGGCAAGTGGCA----- morL 2
-----AGGATGGCAAGTGGAGGA----- morL 1
-----GGATGGCAAGTGGAGGAG----- morL 1

```

```

-----AGGATGGCAAGTGGAGGAG----- morL 1
-----GATGGCAAGTGGAGGAGC----- morL 1
-----GCAGCAGGGTGAAACTGACACA----- mirL 2
-----GCAGCAGGGTGAAACTGACA----- mirL 2
-----CAGCAGGGTGAAACTGACACA----- mirL 2
-----GCAGCAGGGTGAAACTGACAC----- mirL 2
-----GCAGCAGGGTGAAACTGA----- mirL 1
-----AGCAGGGTGAAACTGACACA----- mirL 2
-----GCAGCAGGGTGAAACTGACACAG----- mirL 2
-----CAGCAGGGTGAAACTGACA----- mirL 1
-----GCAGGGTGAAACTGACACA----- mirL 1
-----GCAGCAGGGTGAAACTGAC----- mirL 1
-----AGCAGCAGGGTGAAACTGAC----- mirL 2
-----GGAGCAGCAGGGTGAAACTGACACA----- mirL 2
-----GAGCAGCAGGGTGAAACTG----- mirL 1
-----CAGCAGGGTGAAACTGAC----- mirL 1
-----AGCAGCAGGGTGAAACTGACACA----- mirL 2
-----GAGCAGCAGGGTGAAACT----- mirL 1
-----AGCAGCAGGGTGAAACTGACAC----- mirL 2
-----CAGCAGGGTGAAACTGACACAG----- mirL 2
-----GCAGCAGGGTGAAACTGACACAGTG----- mirL 2
-----AGCAGCAGGGTGAAACTG----- mirL 1
-----GTTCTGTTCTTTCTGTTG----- mirR 1
-----GTTCTGTTCTTTCTGTTGG----- mirR 1
-----GGCAAGCTTCTCCAAGTG----- morL 1
-----TTGGCAAGCTTCTCCAAGTG----- morR 2
-----AGCTTCTCCAAGTGAATC----- morR 1
-----TTGGCAAGCTTCTCCAAG----- morR 1

```

>mmu-mir-1982

```

GACAGAGGTTGGTATTGCTTGGGAGGGTCCTGGGGAGGGGAGTTCTGGCACCCCAACCTCTCACCCATATGTTCTCCCACAGCCGCCCTACTCCGAACCTTC species len reads
GACAGAGGTTGGTATTGC----- morL 18 1
--CAGAGGTTGGTATTGCTT----- morL 18 1
-----TTGGGAGGGTCCTGGGGAGG----- mirL 20 108
-----TTGGGAGGGTCCTGGGGAG----- mirL 19 41
-----TTGGGAGGGTCCTGGGGA----- mirL 18 4
-----GGGAGGGTCCTGGGGAGGG----- mirL 20 4
-----TGGGAGGGTCCTGGGGAGG----- mirL 19 3
-----GGGAGGGTCCTGGGGAGG----- mirL 18 3
-----GCTTGGGAGGGTCCTGGG----- mirL 18 2
-----TTGGGAGGGTCCTGGGGAGGGAGT----- mirL 25 1
-----TGCTTGGGAGGGTCCTGG----- mirL 18 1
-----GGGAGTTCTGGCACCCCA----- loop 18 6
-----GTTCTGGCACCCCAACCTC----- loop 19 5
-----GTTCTGGCACCCCAACCT----- loop 18 4
-----AGTTCTGGCACCCCAACC----- loop 18 3

```

```

-----GGAGTTCTGGCACCCCAA----- loop 18 1
-----GAGTTCTGGCACCCCAAC----- loop 18 1
-----AGGGGAGTTCTGGCACCCCAACC----- loop 23 1
-----TCTCACCTATGTTCTCCCACAG----- mirR 23 1615
-----TCACCCTATGTTCTCCCACAG----- mirR 21 1229
-----TCACCCTATGTTCTCCCACA----- mirR 20 983
-----TCTCACCTATGTTCTCCCACA----- mirR 22 691
-----TCTCACCTATGTTCTCCCACAGC----- mirR 24 253
-----TCACCCTATGTTCTCCCACAGC----- mirR 22 233
-----TCACCCTATGTTCTCCCAC----- mirR 19 216
-----TCTCACCTATGTTCTCCCAC----- mirR 21 183
-----TCTCACCTATGTTCTCCCA----- mirR 20 127
-----TCACCCTATGTTCTCCCA----- mirR 18 123
-----TCTCACCTATGTTCTCC----- mirR 18 92
-----TCTCACCTATGTTCTCC----- mirR 19 71
-----CTCACCTATGTTCTCCCACA----- mirR 21 36
-----CACCTATGTTCTCCCACAG----- mirR 20 35
-----CTCACCTATGTTCTCCCACAG----- mirR 22 33
-----CACCTATGTTCTCCCACA----- mirR 19 28
-----TCACCCTATGTTCTCCCACAGCC----- mirR 23 27
-----CTCACCTATGTTCTCCCACAGCC----- mirR 24 20
-----CACCTATGTTCTCCCAC----- mirR 18 13
-----CTCACCTATGTTCTCCCACAGC----- mirR 23 12
-----CTCACCTATGTTCTCCCAC----- mirR 20 10
-----CTCACCTATGTTCTCCCA----- mirR 19 10
-----CTCTCACCTATGTTCTCCC----- mirR 20 5
-----ACCTCTCACCTATGTTCT----- mirR 19 4
-----ACCTCTCACCTATGTTCT----- mirR 18 4
-----CTCTCACCTATGTTCTCCCACAG----- mirR 24 2
-----CCTCTCACCTATGTTCT----- mirR 18 2
-----TCACCCTATGTTCTCCCACAGCCGC----- mirR 25 2
-----CACCTATGTTCTCCCACAGC----- mirR 21 1
-----CCTCTCACCTATGTTCTC----- mirR 19 1
-----CTCTCACCTATGTTCTCCCACA----- mirR 23 1
-----CTCTCACCTATGTTCTCCCAC----- mirR 22 1
-----AGCCGCCCTACTCCGAAC----- morR 18 5
-----GCCCTACTCCGAACCTTC morR 18 2
-----GCCGCCCTACTCCGAACCT-- morR 19 1

```

>mmu-mir-1198

```

TTTTGTTTGTGACAGTTGTCTGTTATGTGTTCTGGCTGGCTTGGTACTCATGTGTAGCCCAAGCTAGCCTCTAACTCATGGCAGTCATCCTGTCTCAGTCTCCT species len reads
-----GTTTGTGACAGTTGTCTG----- morL 18 2
-----GTGACAGTTGTCTGTTAT----- morL 18 1
TTTTGTTTGTGACAGTTGTC----- morL 20 1
-----TATGTGTTCTGGCTGGCTTGG----- mirL 22 3467
-----TATGTGTTCTGGCTGGCTTG----- mirL 21 809

```

```

-----TATGTGTTCTGGCTGGCTTGGT----- mirL 23 567
-----ATGTGTTCTGGCTGGCTTGG----- mirL 21 215
-----TATGTGTTCTGGCTGGCTT----- mirL 20 183
-----TATGTGTTCTGGCTGGCTTGGTAC----- mirL 25 174
-----TATGTGTTCTGGCTGGCTTGGTA----- mirL 24 169
-----TATGTGTTCTGGCTGGCT----- mirL 19 95
-----ATGTGTTCTGGCTGGCTTGGT----- mirL 22 76
-----ATGTGTTCTGGCTGGCTTGG----- mirL 20 44
-----ATGTGTTCTGGCTGGCTTGGTAC----- mirL 24 22
-----GTGTTCTGGCTGGCTTGG----- mirL 19 13
-----TGTGTTCTGGCTGGCTTGG----- mirL 20 12
-----ATGTGTTCTGGCTGGCTT----- mirL 19 12
-----ATGTGTTCTGGCTGGCTTGGTA----- mirL 23 12
-----ATGTGTTCTGGCTGGCT----- mirL 18 7
-----TGTGTTCTGGCTGGCTT----- mirL 18 3
-----TGTGTTCTGGCTGGCTTGG----- mirL 19 2
-----TTATGTGTTCTGGCTGGCTTGG----- mirL 23 2
-----GTTATGTGTTCTGGCTG----- mirL 18 1
-----GTGTTCTGGCTGGCTTGG----- mirL 18 1
-----ACTCATGTGTAGCCCAAG----- loop 18 11
-----GTACTCATGTGTAGCCCA----- loop 18 7
-----GTACTCATGTGTAGCCCAA----- loop 19 1
-----AAGCTAGCCTCTAACTCATGGC----- mirR 22 255
-----AAGCTAGCCTCTAACTCATGGCA----- mirR 23 15
-----AAGCTAGCCTCTAACTCATGG----- mirR 21 11
-----AAGCTAGCCTCTAACTCATG----- mirR 20 4
-----AAGCTAGCCTCTAACTCATGGCAGTC----- mirR 26 2
-----CAAGCTAGCCTCTAACTCATGGC----- mirR 23 2
-----GCTAGCCTCTAACTCATG----- mirR 18 1
-----AAGCTAGCCTCTAACTCATGGCAG----- mirR 24 1
-----CTAGCCTCTAACTCATGG----- mirR 18 1
-----CCAAGCTAGCCTCTAAC----- mirR 18 1
-----AAGCTAGCCTCTAACTCAT----- mirR 19 1
-----GCAGTCATCCTGTCTCAG----- morR 18 3
-----TCATCCTGTCTCAGTCTCCT morR 20 2
-----TCATCCTGTCTCAGTCTC-- morR 18 2
-----GCAGTCATCCTGTCTCAGTC---- morR 20 1

>mmu-mir-670
TGGTTTGGAGGTGGGCTGACATCCCTGAGTGTATGTGGTGAACCTGAACTTGCCTGGGTTTCTCATATCCATTGAGGAGTGTGAGTGCCTCTTCGCTCAAC species len reads
----TTGGAGGTGGGCTGACA----- morL 18 2
TGGTTTGGAGGTGGGCTGAC----- morL 21 2
----TTTGGAGGTGGGCTGAC----- morL 18 1
-----ATCCCTGAGTGTATGTGGTGAA----- mirL 22 2861
-----ATCCCTGAGTGTATGTGGTGA----- mirL 21 2122
-----ATCCCTGAGTGTATGTGGTG----- mirL 20 396

```



```

-----TCCCTGAGTGTATGTGGT----- mirL 18 118
-----ATCCCTGAGTGTATGTGGT----- mirL 19 105
-----TCCCTGAGTGTATGTGGTGAA----- mirL 21 87
-----TCCCTGAGTGTATGTGGTGA----- mirL 20 43
-----TCCCTGAGTGTATGTGGTG----- mirL 19 43
-----CCCTGAGTGTATGTGGTGAA----- mirL 20 41
-----ATCCCTGAGTGTATGTGGTGAAC----- mirL 23 25
-----CCCTGAGTGTATGTGGTGA----- mirL 19 25
-----ATCCCTGAGTGTATGTGG----- mirL 18 22
-----CCTGAGTGTATGTGGTGAA----- mirL 19 22
-----ATCCCTGAGTGTATGTGGTGAACC----- mirL 24 21
-----CCCTGAGTGTATGTGGTG----- mirL 18 7
-----CCTGAGTGTATGTGGTGA----- mirL 18 6
-----CATCCCTGAGTGTATGTGGTGAA----- mirL 23 5
-----TCCCTGAGTGTATGTGGTGAAC----- mirL 22 5
-----CATCCCTGAGTGTATGTGGTG----- mirL 21 2
-----CATCCCTGAGTGTATGTGGTGA----- mirL 22 2
-----AACCTGAACTTGCCCTGGGTTT----- loop 22 2
-----TGAACTTGCCCTGGGTTT----- loop 18 1
-----CCTGAACTTGCCCTGGGTTTCC----- loop 22 1
-----GAACTTGCCCTGGGTTTC----- loop 18 1
-----CCTCATATCCATTCAGGAGTGT----- mirR 22 50
-----TTCCTCATATCCATTCAGGAGT----- mirR 22 38
-----TTTCCTCATATCCATTCAGGAGT----- mirR 23 26
-----TTCCTCATATCCATTCAGGAGTGT----- mirR 24 23
-----CCTCATATCCATTCAGGAGTGTC----- mirR 23 20
-----TTTCCTCATATCCATTCAGGAGTGT----- mirR 25 15
-----TTTCCTCATATCCATTCAGGAG----- mirR 22 7
-----TTCCTCATATCCATTCAGGAGTGTC----- mirR 25 4
-----TTTCCTCATATCCATTCAGGAGTG----- mirR 24 3
-----CCTCATATCCATTCAGGAGTG----- mirR 21 2
-----TTCCTCATATCCATTCAGGAG----- mirR 21 2
-----CCTCATATCCATTCAGGAGTGTC----- mirR 24 2
-----TCCTCATATCCATTCAGGAGTGT----- mirR 23 1
-----TCCTCATATCCATTCAGGAGTGTC----- mirR 24 1
-----TTCCTCATATCCATTCAGGA----- mirR 20 1
-----TTCCTCATATCCATTCAGGAGTG----- mirR 23 1
-----TTCCTCATATCCATTCAGGAGTGTC----- mirR 26 1
-----TTTCCTCATATCCATTCAGGAGTGTC----- mirR 27 1
-----TTTCCTCATATCCATTCAGGAGTGTC----- mirR 26 1
-----TTTCCTCATATCCATTCAGGA----- mirR 21 1
-----TCATATCCATTCAGGAGTGTC----- mirR 22 1
-----TCAGCTGCCTCTTCGCTCA----- morR 19 5
-----TCAGCTGCCTCTTCGCTC----- morR 18 2
-----TGTCAGCTGCCTCTTCGCTCAA----- morR 22 1
-----CAGCTGCCTCTTCGCTCA----- morR 18 1

```

```

-----GCTGCCTCTTCGCTCAAC morR 18 1
-----TCAGCTGCCTCTTCGCTCAA- morR 20 1

>mmu-mir-767
ATCCATATAGGTTTTTACTCATGCACCATGGTTGTCTGAGCACATAACATGCTTGTCTGCTCATAACCCTATGGTTCCTGAAGAGGAATCTTAACTGTCTA species len reads
ATCCATATAGGTTTTTAC----- morL 18 1
ATCCATATAGGTTTTTACTCAT----- morL 22 1
----TATAGGTTTTTACTCATG----- morL 18 1
-----TGCACCATGGTTGTCTGAGCA----- mirL 21 2846
-----TGCACCATGGTTGTCTGAGCACA----- mirL 23 2264
-----TGCACCATGGTTGTCTGAGCAC----- mirL 22 221
-----GCACCATGGTTGTCTGAGCA----- mirL 20 137
-----TGCACCATGGTTGTCTGAGC----- mirL 20 106
-----TGCACCATGGTTGTCTGAG----- mirL 19 88
-----TGCACCATGGTTGTCTGA----- mirL 18 43
-----CACCATGGTTGTCTGAGCA----- mirL 19 31
-----GCACCATGGTTGTCTGAGCACA----- mirL 22 28
-----CACCATGGTTGTCTGAGCACA----- mirL 21 26
-----ACCATGGTTGTCTGAGCACA----- mirL 20 23
-----ACCATGGTTGTCTGAGCA----- mirL 18 10
-----ATGCACCATGGTTGTCTGAGCA----- mirL 22 7
-----GCACCATGGTTGTCTGAG----- mirL 18 7
-----TGCACCATGGTTGTCTGAGCACAT----- mirL 24 6
-----ATGCACCATGGTTGTCTG----- mirL 18 6
-----CACCATGGTTGTCTGAGC----- mirL 18 4
-----GCACCATGGTTGTCTGAGCAC----- mirL 21 4
-----CATGCACCATGGTTGTCT----- mirL 18 2
-----CATGCACCATGGTTGTCTG----- mirL 19 2
-----TCATGCACCATGGTTGTCTG----- mirL 20 1
-----GCACCATGGTTGTCTGAGC----- mirL 19 1
-----ACCATGGTTGTCTGAGCAC----- mirL 19 1
-----TCATGCACCATGGTTGTC----- mirL 18 1
-----CACATAACATGCTTGTCT----- loop 18 2
-----TCTGCTCATAACCTATGGTTC----- mirR 21 76
-----TCTGCTCATAACCTATGGTTCCT----- mirR 23 58
-----TCTGCTCATAACCTATGGTTC----- mirR 22 56
-----TCTGCTCATAACCTATGGTT----- mirR 20 22
-----TCTGCTCATAACCTATGG----- mirR 18 10
-----TCTGCTCATAACCTATGGT----- mirR 19 3
-----TGTCTGCTCATAACCTATGGTT----- mirR 22 1
-----TGTCTGCTCATAACCTATGGT----- mirR 21 1
-----CTGCTCATAACCTATGGTTCCT----- mirR 22 1
-----CCTGAAGAGGAATCTTAA----- morR 18 3
-----AAGAGGAATCTTAACTGTCT----- morR 20 2
-----TTCCTGAAGAGGAATCTT----- morR 18 1
-----GAAGAGGAATCTTAACTG----- morR 18 1

```

```
-----AAGAGGAATCTTAACTGTCTA morR 21 1

>mmu-mir-1956
GTTTAACGACTCCTGACCTTCAGTCCAGGGCTGAGTCAGCGGAGCCCCGAGTGGCTTCCCTGGCTGGCACCTGGACGTAGGCTATTTCCGTCCACGT species len reads
---TAACGACTCCTGACCTTC----- morL 18 5
-TTTAACGACTCCTGACCT----- morL 18 4
---TAACGACTCCTGACCTTCA----- morL 19 2
GTTTAACGACTCCTGACC----- morL 18 1
---TAACGACTCCTGACCTTCAG----- morL 20 1
-----CGACTCCTGACCTTCAGT----- morL 18 1
-----AGTCCAGGGCTGAGTCAGCGGA----- mirL 22 4870
-----AGTCCAGGGCTGAGTCAGCGG----- mirL 21 637
-----GTCCAGGGCTGAGTCAGCGGA----- mirL 21 133
-----AGTCCAGGGCTGAGTCAGCG----- mirL 20 121
-----CCAGGGCTGAGTCAGCGGA----- mirL 19 48
-----AGTCCAGGGCTGAGTCAGCGGAG----- mirL 23 41
-----TCCAGGGCTGAGTCAGCGGA----- mirL 20 35
-----AGTCCAGGGCTGAGTCAG----- mirL 18 33
-----GTCCAGGGCTGAGTCAGCGG----- mirL 20 25
-----AGTCCAGGGCTGAGTCAGC----- mirL 19 17
-----CAGTCCAGGGCTGAGTCAGCGGA----- mirL 23 10
-----CCAGGGCTGAGTCAGCGG----- mirL 18 10
-----TCCAGGGCTGAGTCAGCGG----- mirL 19 9
-----AGTCCAGGGCTGAGTCAGCGGAGCCCC----- mirL 27 5
-----GTCCAGGGCTGAGTCAGCGGAG----- mirL 22 2
-----TTCAGTCCAGGGCTGAGTC----- mirL 19 1
-----CCCTGGCTGGCACCTGGACGTAG----- mirR 23 26
-----CCCTGGCTGGCACCTGGACGTA----- mirR 22 11
-----CCCTGGCTGGCACCTGGACGTAGG----- mirR 24 3
-----CCCTGGCTGGCACCTGGACGT----- mirR 21 2
-----TGGCTGGCACCTGGACGT----- mirR 18 2
-----CTGGCTGGCACCTGGACG----- mirR 18 1
-----TCCCTGGCTGGCACCTGGA----- mirR 19 1
-----CCTGGCTGGCACCTGGAC----- mirR 18 1
-----CCCTGGCTGGCACCTGGA----- mirR 18 1
-----AGGCTATTTCCGTCCACGT morR 19 1
```

```
>mmu-mir-669h
ATTCATGTGATGCCACCAAAAATATGCATGGGTGTATAGTTGAGTGCATATTCATTTCTCTATATGAATATGCATATACACACATGCACACACACACTCACACACAGGAATGACACTCGTTTATCC species
---ATGTGATGCCACCAAAA----- morL 18 3
ATTCATGTGATGCCACCAAAA----- morL 22 1
--TCATGTGATGCCACCAAAA----- morL 19 1
-----ATGCATGGGTGTATAGTTGAGTGC----- mirL 24 2
-----ATGCATGGGTGTATAGTTGAGTG----- mirL 23 1
-----ATGCATGGGTGTATAGTTGAGTGCAT----- mirL 26 7
-----ATGCATGGGTGTATAGTTGAGTGCATAT----- mirL 28 3
```

```
-----ATGCATGGGTGTATAGTTGAGTGCA----- mirL 25 2
-----ATGCATGGGTGTATAGTTGAGT----- mirL 22 1
-----ATGCATGGGTGTATAGTTGA----- mirL 20 1
-----TATGCATGGGTGTATAGTTGAGT----- mirL 23 1
-----TATGCATGGGTGTATAGTTGAGTGC----- mirL 25 9
-----TATGCATGGGTGTATAGTTGAGTG----- mirL 24 5
-----TATGCATGGGTGTATAGTTGAGTGCA----- mirL 27 4
-----TATGCATGGGTGTATAGTTGAGTGCA----- mirL 28 2
-----TATGCATGGGTGTATAGTTGAGTGCA----- mirL 26 1
-----CATGGGTGTATAGTTGAGTGC----- mirL 21 1
-----GCATGGGTGTATAGTTGAGTG----- mirL 21 1
-----TATGCATGGGTGTATAGTTGAG----- mirL 22 1
-----GCATGGGTGTATAGTTGAGTGC----- mirL 22 1
-----TGCATGGGTGTATAGTTGAGTGC----- mirL 23 4
-----TGCATGGGTGTATAGTTG----- mirL 18 2
-----CATGGGTGTATAGTTGAGTG----- mirL 20 2
-----GCATGGGTGTATAGTTGAGT----- mirL 20 2
-----TGCATGGGTGTATAGTTGAGTGCA----- mirL 28 2
-----TGCATGGGTGTATAGTTGAGTGCA----- mirL 27 2
-----TGCATGGGTGTATAGTTGAGTG----- mirL 22 2
-----GCATGGGTGTATAGTTGAGTGCA----- mirL 26 1
-----TGCATGGGTGTATAGTTGAGT----- mirL 21 1
-----GCATGGGTGTATAGTTGA----- mirL 18 1
-----ACACACACACACTCACACAC----- mirR 22 9
-----CACACACACACACTCACA----- mirR 20 8
-----GCACACACACACACTCACAC----- mirR 22 7
-----ACACACACACTCACAC----- mirR 18 7
-----CACACACACACTCACAC----- mirR 21 6
-----ACACACACACTCACACA----- mirR 19 5
-----GCACACACACACTC----- mirR 18 5
-----TGCACACACACACTCACA----- mirR 22 5
-----TGCACACACACACTCACAC----- mirR 25 4
-----CACACACACACTCACAC----- mirR 23 3
-----ACACACACACTCAC----- mirR 18 3
-----CACACACACTCACAC----- mirR 21 3
-----TGCACACACACTCAC----- mirR 21 2
-----GCACACACACTCA----- mirR 19 2
-----ACACACACTCACACAG----- mirR 22 2
-----GCACACACTCAC----- mirR 20 2
-----ACACACTCACACAG----- mirR 24 2
-----TGCACACTC----- mirR 19 2
-----CACACTCACACA----- mirR 18 2
-----TGCACACTCACAC----- mirR 23 2
-----ACACTCACAC----- mirR 20 2
-----CACACTCACAC----- mirR 19 2
-----CACACTCACACA----- mirR 22 1
```

```

-----GCACACACACACACTCACACACAG----- mirR 26 1
-----ACACACACACACTCACACA----- mirR 21 1
-----CACACACACACTCACACACAG----- mirR 23 1
-----GCACACACACACACTCACACAC----- mirR 24 1
-----ACACACACACACTCACACACAG----- mirR 25 1
-----CACACACACACACTCACACACA----- mirR 24 1
-----GCACACACACACACTCACACACA----- mirR 25 1
-----TGCACACACACACACTCACACACA----- mirR 26 1
-----ACAGGAATGACACTCGTTT----- morR 19 3
-----AATGACACTCGTTTATCC----- morR 18 2
-----CACAGGAATGACACTCGT----- morR 18 1
-----ACAGGAATGACACTCGTT----- morR 18 1

```

>mmu-mir-3060

```

TCAGATTGCTGGTGATGTCCTGGGCGTGGGGGTGGGGAGTGCTTCGTGCTTCTGGTTGAAGAGAAAATGACCATAGCACAGAAGCACTCCCACCAGCTTTGTCTGTGGCTTCAGGTGAC species len reads
-----TGCTGGTGATGTCCTGGG----- morL 18 4
--AGATTGCTGGTGATGTC----- morL 18 2
TCAGATTGCTGGTGATGTC----- morL 18 2
-----GGGCGTGGGGGTGGGGAG----- mirL 18 24
-----GGGCGTGGGGGTGGGGAGT----- mirL 19 7
-----CCTGGGCGTGGGGGTGGGG----- mirL 19 5
-----GGGCGTGGGGGTGGGGAGT----- mirL 18 4
-----GGGCGTGGGGGTGGGGAGTG----- mirL 20 3
-----TGGGCGTGGGGGTGGGGA----- mirL 18 3
-----GGGCGTGGGGGTGGGGAGTG----- mirL 19 3
-----CTGGGCGTGGGGGTGGGG----- mirL 18 3
-----GCGTGGGGGTGGGGAGTG----- mirL 18 2
-----GGGCGTGGGGGTGGGGAGTGCT----- mirL 22 2
-----TGGGCGTGGGGGTGGGGAG----- mirL 19 2
-----CCTGGGCGTGGGGGTGGG----- mirL 18 1
-----CCTGGGCGTGGGGGTGGGGA----- mirL 20 1
-----CCATAGCACAGAAGCACTCCCACC----- mirR 24 1089
-----ATAGCACAGAAGCACTCCCACC----- mirR 22 1028
-----CCATAGCACAGAAGCACTCCCAC----- mirR 23 1002
-----CCATAGCACAGAAGCACTCCCA----- mirR 22 918
-----CATAGCACAGAAGCACTCCCACC----- mirR 23 399
-----ATAGCACAGAAGCACTCCCACCA----- mirR 23 303
-----CCATAGCACAGAAGCACTCCCACCA----- mirR 25 262
-----CATAGCACAGAAGCACTCCCAC----- mirR 22 223
-----CATAGCACAGAAGCACTCCCACCA----- mirR 24 130
-----CCATAGCACAGAAGCACTCCC----- mirR 21 84
-----ATAGCACAGAAGCACTCCCAC----- mirR 21 82
-----CATAGCACAGAAGCACTCCCA----- mirR 21 71
-----ATAGCACAGAAGCACTCCCACCAG----- mirR 24 65
-----CCATAGCACAGAAGCACTCCCACCAG----- mirR 26 40
-----ATAGCACAGAAGCACTCCCA----- mirR 20 40

```

```

-----CATAGCACAGAAGCACTCCCACCAG----- mirR 25 26
-----CATAGCACAGAAGCACTCCC----- mirR 20 20
-----CCATAGCACAGAAGCACTCC----- mirR 20 18
-----ATAGCACAGAAGCACTCC----- mirR 18 8
-----ATAGCACAGAAGCACTCCC----- mirR 19 5
-----CATAGCACAGAAGCACTCC----- mirR 19 3
-----TAGCACAGAAGCACTCCCA----- mirR 19 1
-----ACCATAGCACAGAAGCAC----- mirR 18 1
-----TAGCACAGAAGCACTCCC----- mirR 18 1
-----AGCTTTGTCTGTGGCTTC----- morR 18 1
-----CCAGCTTTGTCTGTGGCTTCAGGT--- morR 24 1
-----TTTGTCTGTGGCTTCAGGTGAC morR 22 1
-----ACCAGCTTTGTCTGTGGC----- morR 18 1
-----GCTTTGTCTGTGGCTTCA----- morR 18 1

```

>mmu-mir-598

| Sequence                                                                                                                | species | len | reads |
|-------------------------------------------------------------------------------------------------------------------------|---------|-----|-------|
| GCTCCATGATGCTGCTGATGCTGGCGGTGATGCCGATGGTGCGAGCTGAAAATGGGCTGCTACGTCATCGTCGTCATCGTTATCATCATCATCAGCACAGCCATCAGATCGCTGGCACC | mirR    | 25  | 26    |
| ---CATGATGCTGCTGATGCTG---                                                                                               | mirR    | 20  | 20    |
| ---CATGATGCTGCTGATGCT---                                                                                                | mirR    | 20  | 18    |
| --TCCATGATGCTGCTGATGCT---                                                                                               | mirR    | 18  | 8     |
| ---ATGATGCTGCTGATGCTG---                                                                                                | mirR    | 19  | 5     |
| --TCCATGATGCTGCTGATGCTG---                                                                                              | mirR    | 19  | 3     |
| -CTCCATGATGCTGCTGATG---                                                                                                 | mirR    | 19  | 1     |
| GCTCCATGATGCTGCTGATGCTG---                                                                                              | mirR    | 18  | 1     |
| --TCCATGATGCTGCTGATG---                                                                                                 | mirR    | 18  | 1     |
| ---GATGCTGCTGATGCTGGC---                                                                                                | mirR    | 18  | 1     |
| ---ATGATGCTGCTGATGCTGG---                                                                                               | mirR    | 18  | 1     |
| ---ATGCTGCTGATGCTGGCG---                                                                                                | mirR    | 18  | 1     |
| -----GCGGTGATGCCGATGGTGCGAGC-----                                                                                       | mirL    | 23  | 25    |
| -----GCGGTGATGCCGATGGTGCGAG-----                                                                                        | mirL    | 22  | 20    |
| -----GCGGTGATGCCGATGGTGCGA-----                                                                                         | mirL    | 21  | 10    |
| -----GGTGATGCCGATGGTGCGA-----                                                                                           | mirL    | 19  | 7     |
| -----GGCGGTGATGCCGATGGTGCGAG-----                                                                                       | mirL    | 23  | 7     |
| -----GCGGTGATGCCGATGGTGCGAGCT-----                                                                                      | mirL    | 24  | 4     |
| -----CGGTGATGCCGATGGTGCGAG-----                                                                                         | mirL    | 21  | 2     |
| -----GGTGATGCCGATGGTGCG-----                                                                                            | mirL    | 18  | 1     |
| -----GTGATGCCGATGGTGCGAG-----                                                                                           | mirL    | 19  | 1     |
| -----CGGTGATGCCGATGGTGCGA-----                                                                                          | mirL    | 20  | 1     |
| -----CTGGCGGTGATGCCGATG-----                                                                                            | mirL    | 18  | 1     |
| -----GCGGTGATGCCGATGGTGCG-----                                                                                          | mirL    | 19  | 1     |
| -----GTGATGCCGATGGTGCGA-----                                                                                            | mirL    | 18  | 1     |
| -----TACGTCATCGTCGTCATCGTTA-----                                                                                        | mirR    | 22  | 1880  |
| -----TACGTCATCGTCGTCATCGTTAT-----                                                                                       | mirR    | 23  | 943   |
| -----TACGTCATCGTCGTCATCGTTATC-----                                                                                      | mirR    | 24  | 845   |
| -----TACGTCATCGTCGTCATCGTTATCA-----                                                                                     | mirR    | 25  | 520   |
| -----TACGTCATCGTCGTCATCGTT-----                                                                                         | mirR    | 21  | 441   |

```

-----TACGTCATCGTCGTCATCGT----- mirR 20 245
-----TACGTCATCGTCGTCATCG----- mirR 19 210
-----ACGTCATCGTCGTCATCGTTAT----- mirR 22 34
-----ACGTCATCGTCGTCATCGTTA----- mirR 21 27
-----CGTCATCGTCGTCATCGTTA----- mirR 20 19
-----ACGTCATCGTCGTCATCGTT----- mirR 20 17
-----GTCATCGTCGTCATCGTTA----- mirR 19 13
-----ACGTCATCGTCGTCATCGTTATC----- mirR 23 12
-----GTCATCGTCGTCATCGTT----- mirR 18 11
-----ACGTCATCGTCGTCATCGT----- mirR 19 10
-----ACGTCATCGTCGTCATCG----- mirR 18 7
-----ACGTCATCGTCGTCATCGTTATCA----- mirR 24 5
-----GTCATCGTCGTCATCGTTATC----- mirR 21 1
-----TCATCATCAGCACAGCCATCAG----- morR 22 13
-----TCATCATCAGCACAGCCATCAGA----- morR 23 7
-----TTATCATCATCATCAGCACAGC----- morR 22 4
-----TTATCATCATCATCAGCAC----- morR 19 4
-----TTATCATCATCATCAGCA----- morR 18 4
-----TCATCATCAGCACAGCCATCA----- morR 21 4
-----TCATCATCAGCACAGCCATCAGATCGC----- morR 27 3
-----TATCATCATCATCAGCACA----- morR 19 3
-----ATCATCATCATCAGCACAG----- morR 19 2
-----ATCATCATCAGCACAGCC----- morR 18 2
-----TCATCATCAGCACAGCCATCAGAT----- morR 24 2
-----TCATCATCATCAGCACAGCCAT----- morR 22 1
-----TCATCATCATCAGCACAGCC----- morR 20 1
-----TCATCATCAGCACAGCCATCAGATC----- morR 25 1
-----TCATCATCATCAGCACAG----- morR 18 1
-----TCATCATCAGCACAGCCATCAGATCGCTGGCACC morR 34 1

```

>mmu-mir-133a-2

```

GAAGCCAAATGCTTTGCTGAAGCTGGTAAATGGAACCAAATCAGCTGTTGGATGGATTTGGTCCCCTTCAACCAGCTGTAGCTGCGCATTGATCACGC species len reads
---GCCAAATGCTTTGCTGAA----- morL 18 12
GAAGCCAAATGCTTTGCT----- morL 18 5
----AAATGCTTTGCTGAAGCT----- morL 18 2
-AAGCCAAATGCTTTGCTG----- morL 18 2
---CCAAATGCTTTGCTGAAG----- morL 18 2
GAAGCCAAATGCTTTGCTG----- morL 19 2
-----GCTGGTAAATGGAACCAA----- mirL 20 3486
-----GCTGGTAAATGGAACCAAAT----- mirL 21 1460
-----GCTGGTAAATGGAACCAA----- mirL 19 138
-----GCTGGTAAATGGAACCA----- mirL 18 36
-----AGCTGGTAAATGGAACCAA----- mirL 21 24
-----CTGGTAAATGGAACCAA----- mirL 19 18
-----TGGTAAATGGAACCAA----- mirL 18 7
-----AGCTGGTAAATGGAACCAAAT----- mirL 22 5

```

```

-----AGCTGGTAAAATGGAACC----- mirL 18 3
-----GCTGGTAAAATGGAACCAAATC----- mirL 22 2
-----AGCTGGTAAAATGGAACCAA----- mirL 20 2
-----GGTAAAATGGAACCAAATC----- mirL 19 2
-----CTGGTAAAATGGAACCAAAT----- mirL 20 2
-----GAAGCTGGTAAAATGGAAC----- mirL 19 1
-----AGCTGGTAAAATGGAACCAAATC----- mirL 23 1
-----GGTAAAATGGAACCAAAT----- mirL 18 1
-----AGCTGGTAAAATGGAACCAAATCA----- mirL 24 1
-----TCAGCTGTTGGATGGATT----- loop 18 1
-----TTTGGTCCCCTTCAACCAGCTG----- mirR 22 151
-----TTGGTCCCCTTCAACCAGCTGT----- mirR 22 139
-----TTTGGTCCCCTTCAACCAGCTGT----- mirR 23 43
-----TTGGTCCCCTTCAACCAGCTG----- mirR 21 41
-----GGTCCCCTTCAACCAGCTG----- mirR 19 30
-----TGGTCCCCTTCAACCAGCTGT----- mirR 21 19
-----TGGTCCCCTTCAACCAGCTG----- mirR 20 9
-----GGTCCCCTTCAACCAGCTGT----- mirR 20 8
-----GATTTGGTCCCCTTCAAC----- mirR 18 4
-----TTGGTCCCCTTCAACCAGCTGTAG----- mirR 24 1
-----GATTTGGTCCCCTTCAACC----- mirR 19 1
-----TTGGTCCCCTTCAACCAGCTGTA----- mirR 23 1
-----TAGCTGCGCATTGATCAGC----- morR 19 1
-----GCTGCGCATTGATCAGC----- morR 18 1
-----TGTAGCTGCGCATTGATC----- morR 18 1
-----CTGTAGCTGCGCATTGAT----- morR 18 1

```

>mmu-mir-133a-1

```

AGCTGGTAAAATGGAACCAAATCGCCTCTTCAATGGATTTGGTCCCCTTCAACCAGCTGTAGCTATGCATTGATTAC species len reads
-GCTGGTAAAATGGAACCAA----- mirL 20 3486
-GCTGGTAAAATGGAACCAAAT----- mirL 21 1460
-GCTGGTAAAATGGAACCAA----- mirL 19 138
-GCTGGTAAAATGGAACCAA----- mirL 18 36
AGCTGGTAAAATGGAACCAA----- mirL 21 24
--CTGGTAAAATGGAACCAA----- mirL 19 18
--TGGTAAAATGGAACCAA----- mirL 18 7
AGCTGGTAAAATGGAACCAAAT----- mirL 22 5
AGCTGGTAAAATGGAACC----- mirL 18 3
-GCTGGTAAAATGGAACCAAATC----- mirL 22 2
AGCTGGTAAAATGGAACCAA----- mirL 20 2
--CTGGTAAAATGGAACCAAAT----- mirL 20 2
--GGTAAAATGGAACCAAATC----- mirL 19 2
AGCTGGTAAAATGGAACCAAATC----- mirL 23 1
--GGTAAAATGGAACCAAAT----- mirL 18 1
-----ATCGCCTCTTCAATGGAT----- loop 18 2
-----AAATCGCCTCTTCAATGG----- loop 18 1

```



```

-----TTTGGTCCCCTTCAACCAGCTG----- mirR 22 151
-----TTGGTCCCCTTCAACCAGCTGT----- mirR 22 139
-----TTTGGTCCCCTTCAACCAGCTGT----- mirR 23 43
-----TTGGTCCCCTTCAACCAGCTG----- mirR 21 41
-----GGTCCCCTTCAACCAGCTG----- mirR 19 30
-----TGGTCCCCTTCAACCAGCTGT----- mirR 21 19
-----TGGTCCCCTTCAACCAGCTG----- mirR 20 9
-----GGTCCCCTTCAACCAGCTGT----- mirR 20 8
-----GATTTGGTCCCCTTCAAC----- mirR 18 4
-----TTGGTCCCCTTCAACCAGCTGTAG----- mirR 24 1
-----GATTTGGTCCCCTTCAACC----- mirR 19 1
-----TTGGTCCCCTTCAACCAGCTGTA----- mirR 23 1
-----TAGCTATGCATTGATTAC morR 18 1
-----TGTAGCTATGCATTGATTA- morR 19 1

>mmu-mir-1981
AAGGGTGTGAGCTGTCCCAGGTAAGGCTGGGCTTAGACGTGGCCTTTGGGTGTGGAATGCACCTCCGTTTGTAACCGCCATCTAACCTGGCCTTTGACAGGTGCGTTCTGACTACAGTGGG species len re
AAGGGTGTGAGCTGTCC----- morL 18 2
---GTGTTGAGCTGTCCCAGG----- morL 18 1
---TGTGAGCTGTCCCAGGT----- morL 18 1
-----GTAAGGCTGGGCTTAGACGTGGC----- mirL 24 457
-----GTAAGGCTGGGCTTAGACGTGG----- mirL 23 367
-----GTAAGGCTGGGCTTAGACGTGGCC----- mirL 25 306
-----GTAAGGCTGGGCTTAGACGTG----- mirL 22 261
-----GTAAGGCTGGGCTTAGACGTGGCCT----- mirL 26 136
-----GTAAGGCTGGGCTTAGACGTGGCCTT----- mirL 27 92
-----GTAAGGCTGGGCTTAGACGT----- mirL 21 57
-----AAAGGCTGGGCTTAGACGTGG----- mirL 21 27
-----AAGGCTGGGCTTAGACGTGG----- mirL 20 14
-----AAAGGCTGGGCTTAGACGTG----- mirL 20 11
-----AAGGCTGGGCTTAGACGTG----- mirL 19 11
-----AAAGGCTGGGCTTAGACG----- mirL 18 4
-----TAAAGGCTGGGCTTAGACG----- mirL 19 4
-----TAAAGGCTGGGCTTAGACGTGG----- mirL 22 2
-----AAGGCTGGGCTTAGACGT----- mirL 18 1
-----TAAAGGCTGGGCTTAGACGTG----- mirL 21 1
-----AAGGCTGGGCTTAGACGTGGC----- mirL 21 1
-----TAAAGGCTGGGCTTAGACGTGGC----- mirL 23 1
-----AAGGCTGGGCTTAGACGTGGCCTT----- mirL 24 1
-----AAAGGCTGGGCTTAGACGTGGC----- mirL 22 1
-----CTTTGGGTGTGGAATGCACCTCCGTTTGTAAC----- loop 32 16
-----CATCTAACCTGGCCTTTGACA----- mirR 22 1635
-----CATCTAACCTGGCCTTTGACAGG----- mirR 24 1084
-----CATCTAACCTGGCCTTTGACAG----- mirR 23 614
-----ATCTAACCTGGCCTTTGACAGG----- mirR 23 135
-----CATCTAACCTGGCCTTTGAC----- mirR 21 120

```

```

-----CATCTAACCCCTGGCCTTTGA----- mirR 20 94
-----CATCTAACCCCTGGCCTTTG----- mirR 19 47
-----CATCTAACCCCTGGCCTTT----- mirR 18 40
-----ATCTAACCCCTGGCCTTTGACAGGT----- mirR 24 28
-----ATCTAACCCCTGGCCTTTGACAG----- mirR 22 14
-----ATCTAACCCCTGGCCTTTGACA----- mirR 21 4
-----ATCTAACCCCTGGCCTTTGACAGGTG----- mirR 25 4
-----ATCTAACCCCTGGCCTTTGAC----- mirR 20 3
-----ATCTAACCCCTGGCCTTTG----- mirR 18 2
-----TCTAACCCCTGGCCTTTGACAG----- mirR 21 1
-----CTAACCCCTGGCCTTTGACA----- mirR 19 1
-----GCCATCTAACCCCTGGCCT----- mirR 18 1
-----AGGTGCGTTCTGACTACAG---- morR 19 1
-----TGC GTTCTGACTACAGTG-- morR 18 1
-----AGGTGCGTTCTGACTACAGTGA morR 23 1

```

>mmu-mir-217

```

AGTTTTTGATGTTGCAGATACTGCATCAGGAAGTACTGATGATAAGACTTAATCCCCATCAGTTCCTAATGCATTGCCTTCAGCATCTAAACAACCACCAGCAAACCTCAAGTTAGACTTG species len read
AGTTTTTGATGTTGCAGATACTGCATCAGGAAGTACTGATGATAAGACTTAATCCCCATCAGTTCCTAATGCATTGCCTTCAGCATCTAAACAACCACCAGCAAACCTCAAGTTAGACTTG morL 18 2
-----TACTGCATCAGGAAGTACTGATG----- mirL 24 2523
-----TACTGCATCAGGAAGTACTG----- mirL 22 936
-----TACTGCATCAGGAAGTACTGGA----- mirL 23 727
-----TACTGCATCAGGAAGTACTG----- mirL 21 616
-----TACTGCATCAGGAAGTACT----- mirL 20 335
-----ACTGCATCAGGAAGTACTGAT----- mirL 23 86
-----CTGCATCAGGAAGTACTGAT----- mirL 22 66
-----TACTGCATCAGGAAGTGA----- mirL 18 47
-----TACTGCATCAGGAAGTACTGGATA----- mirL 25 36
-----CTGCATCAGGAAGTACTG----- mirL 20 24
-----TGCATCAGGAAGTACTG----- mirL 19 22
-----TGCATCAGGAAGTACTGGAT----- mirL 21 22
-----ACTGCATCAGGAAGTACTG----- mirL 21 20
-----CTGCATCAGGAAGTACTG----- mirL 19 19
-----ACTGCATCAGGAAGTACT----- mirL 19 10
-----ACTGCATCAGGAAGTACTGGA----- mirL 22 9
-----ATACTGCATCAGGAAGTACTGGAT----- mirL 25 6
-----ACTGCATCAGGAAGTACTG----- mirL 20 5
-----CTGCATCAGGAAGTACTGGATA----- mirL 23 5
-----CTGCATCAGGAAGTACTGGA----- mirL 21 5
-----TGCATCAGGAAGTACTGGA----- mirL 20 5
-----CTGCATCAGGAAGTACT----- mirL 18 4
-----ATACTGCATCAGGAAGTACTGG----- mirL 23 2
-----ACTGCATCAGGAAGTACTG----- mirL 18 2
-----TGCATCAGGAAGTACTG----- mirL 18 2
-----CTAAACAACCACCAGCAA----- mirR 18 19
-----TCTAAACAACCACCAGCAAAC----- mirR 21 5

```

```

-----AACCAACCACCAGCAAACA----- mirR 18 4
-----AACCAACCACCAGCAAACAC----- mirR 19 3
-----CTAAACAACCACCAGCAAAA----- mirR 19 2
-----TAAACAACCACCAGCAAAA----- mirR 18 2
-----CTAAACAACCACCAGCAAACAC----- mirR 22 2
-----TAAACAACCACCAGCAAACAC----- mirR 21 1
-----AAACAACCACCAGCAAACA----- mirR 19 1
-----CACCTCAAGTTAGACTTG----- morR 18 5
-----ACACCTCAAGTTAGACTT----- morR 18 1
-----AACACCTCAAGTTAGACT----- morR 18 1

```

>mmu-mir-669m-1

| CTCCCAATGTATGTGCATGTGTATAGTTTTGTGTGCATGTGCATGTGTGTATATGAATAGACATATACATCCACACAAACATATACAAGCAAGCACAGATACACACACA   | species | len | reads |
|-----------------------------------------------------------------------------------------------------------------|---------|-----|-------|
| CTCCCAATGTATGTGCATGTGTATAGTTTTGTGTGCATGTGCATGTGTGTATATGAATAGACATATACATCCACACAAACATATACAAGCAAGCACAGATACACACACA   | morL    | 27  | 16    |
| --CCCAATGTATGTGCATGTGTATAGTTTTGTGTGCATGTGCATGTGTGTATATGAATAGACATATACATCCACACAAACATATACAAGCAAGCACAGATACACACACA   | morL    | 25  | 3     |
| ---CCAATGTATGTGCATGTGTATAGTTTTGTGTGCATGTGCATGTGTGTATATGAATAGACATATACATCCACACAAACATATACAAGCAAGCACAGATACACACACA   | morL    | 24  | 2     |
| ----AATGTATGTGCATGTGTAGTTTTGTGTGCATGTGCATGTGTGTATATGAATAGACATATACATCCACACAAACATATACAAGCAAGCACAGATACACACACA      | morL    | 18  | 2     |
| -----CCAATGTATGTGCATGTGTAGTTTTGTGTGCATGTGCATGTGTGTATATGAATAGACATATACATCCACACAAACATATACAAGCAAGCACAGATACACACACA   | morL    | 22  | 1     |
| -----TCCCAATGTATGTGCATGTGTAGTTTTGTGTGCATGTGCATGTGTGTATATGAATAGACATATACATCCACACAAACATATACAAGCAAGCACAGATACACACACA | morL    | 26  | 1     |
| -----AGTTTTGTGTGCATGTGCATGTGTGTATATGAATAGACATATACATCCACACAAACATATACAAGCAAGCACAGATACACACACA                      | mirL    | 29  | 19    |
| -----AGTTTTGTGTGCATGTGCATGTGTGTATATGAATAGACATATACATCCACACAAACATATACAAGCAAGCACAGATACACACACA                      | mirL    | 27  | 12    |
| -----AGTTTTGTGTGCATGTGCATGTGTGTATATGAATAGACATATACATCCACACAAACATATACAAGCAAGCACAGATACACACACA                      | mirL    | 28  | 8     |
| -----ATATACATCCACACAAACATATATGAATAGACATATACATCCACACAAACATATACAAGCAAGCACAGATACACACACA                            | mirR    | 22  | 2275  |
| -----CATATACATCCACACAAACATATATGAATAGACATATACATCCACACAAACATATACAAGCAAGCACAGATACACACACA                           | mirR    | 23  | 1824  |
| -----ATATACATCCACACAAACATATATGAATAGACATATACATCCACACAAACATATACAAGCAAGCACAGATACACACACA                            | mirR    | 21  | 392   |
| -----CATATACATCCACACAAACATATATGAATAGACATATACATCCACACAAACATATACAAGCAAGCACAGATACACACACA                           | mirR    | 22  | 214   |
| -----TATACATCCACACAAACATATATGAATAGACATATACATCCACACAAACATATACAAGCAAGCACAGATACACACACA                             | mirR    | 21  | 184   |
| -----CATATACATCCACACAAACATATATGAATAGACATATACATCCACACAAACATATACAAGCAAGCACAGATACACACACA                           | mirR    | 21  | 103   |
| -----ATATACATCCACACAAACAATGAATAGACATATACATCCACACAAACATATACAAGCAAGCACAGATACACACACA                               | mirR    | 19  | 69    |
| -----ATACATCCACACAAACATATATGAATAGACATATACATCCACACAAACATATACAAGCAAGCACAGATACACACACA                              | mirR    | 20  | 67    |
| -----ATATACATCCACACAAACATATATGAATAGACATATACATCCACACAAACATATACAAGCAAGCACAGATACACACACA                            | mirR    | 23  | 62    |
| -----ATATACATCCACACAAACATATATGAATAGACATATACATCCACACAAACATATACAAGCAAGCACAGATACACACACA                            | mirR    | 20  | 44    |
| -----ATACATCCACACAAACATATATGAATAGACATATACATCCACACAAACATATACAAGCAAGCACAGATACACACACA                              | mirR    | 19  | 39    |
| -----TATACATCCACACAAACATATATGAATAGACATATACATCCACACAAACATATACAAGCAAGCACAGATACACACACA                             | mirR    | 22  | 38    |
| -----TACATCCACACAAACATATATGAATAGACATATACATCCACACAAACATATACAAGCAAGCACAGATACACACACA                               | mirR    | 19  | 33    |
| -----ATATACATCCACACAAACATATATGAATAGACATATACATCCACACAAACATATACAAGCAAGCACAGATACACACACA                            | mirR    | 18  | 25    |
| -----CATATACATCCACACAAACATATATGAATAGACATATACATCCACACAAACATATACAAGCAAGCACAGATACACACACA                           | mirR    | 24  | 19    |
| -----CATATACATCCACACAAACAATGAATAGACATATACATCCACACAAACATATACAAGCAAGCACAGATACACACACA                              | mirR    | 20  | 18    |
| -----TATACATCCACACAAACATATATGAATAGACATATACATCCACACAAACATATACAAGCAAGCACAGATACACACACA                             | mirR    | 20  | 17    |
| -----ACATATACATCCACACAAACATATATGAATAGACATATACATCCACACAAACATATACAAGCAAGCACAGATACACACACA                          | mirR    | 22  | 12    |
| -----TACATCCACACAAACATATATGAATAGACATATACATCCACACAAACATATACAAGCAAGCACAGATACACACACA                               | mirR    | 18  | 5     |
| -----ATATACATCCACACAAACATATATGAATAGACATATACATCCACACAAACATATACAAGCAAGCACAGATACACACACA                            | mirR    | 24  | 4     |
| -----ACATATACATCCACACAAACATATATGAATAGACATATACATCCACACAAACATATACAAGCAAGCACAGATACACACACA                          | mirR    | 24  | 4     |
| -----CATATACATCCACACAAAATGAATAGACATATACATCCACACAAACATATACAAGCAAGCACAGATACACACACA                                | mirR    | 18  | 3     |
| -----ATACATCCACACAAACATATATGAATAGACATATACATCCACACAAACATATACAAGCAAGCACAGATACACACACA                              | mirR    | 21  | 3     |
| -----GACATATACATCCACACAATGAATAGACATATACATCCACACAAACATATACAAGCAAGCACAGATACACACACA                                | mirR    | 18  | 3     |

```

-----CATATACATCCACACAAAAC----- mirR 19 2
-----GACATATACATCCACACAAAACATAT----- mirR 25 2
-----TATACATCCACACAAAACAT----- mirR 19 2
-----GACATATACATCCACACAAAAC----- mirR 21 1
-----TATACATCCACACAAAACATATAC----- mirR 23 1
-----TACATCCACACAAAACATATA----- mirR 20 1
-----ACATATACATCCACACAAAACA----- mirR 21 1
-----ATACATCCACACAAAACAT----- mirR 18 1
-----GACATATACATCCACACAAA----- mirR 19 1
-----ACATATACATCCACACAAA----- mirR 19 1
-----TATACATCCACACAAAACA----- mirR 18 1
-----AGCAAGCACAGATACACACAC----- morR 21 2
-----AGCAAGCACAGATACACACACA----- morR 22 2
-----AGCAAGCACAGATACACACAAA----- morR 18 1

```

>mmu-mir-669m-2

```

AGTTTTGTGTGCATGTGCATGTGTGTATATGAATATACATATACATCCACACAAAACATATACAAGCATGCACAGATATACACACACA species len reads
AGTTTTGTGTGCATGTGCATGTGTGTATA----- mirL 29 19
AGTTTTGTGTGCATGTGCATGTGTATA----- mirL 27 12
AGTTTTGTGTGCATGTGCATGTGTATA----- mirL 28 8
-----ATATACATCCACACAAAACATAT----- mirR 22 2275
-----CATATACATCCACACAAAACATAT----- mirR 23 1824
-----ATATACATCCACACAAAACATA----- mirR 21 392
-----CATATACATCCACACAAAACATA----- mirR 22 214
-----TATACATCCACACAAAACATAT----- mirR 21 184
-----CATATACATCCACACAAAACAT----- mirR 21 103
-----ATATACATCCACACAAAACA----- mirR 19 69
-----ATACATCCACACAAAACATAT----- mirR 20 67
-----ATATACATCCACACAAAACATATA----- mirR 23 62
-----ATATACATCCACACAAAACAT----- mirR 20 44
-----ATACATCCACACAAAACATA----- mirR 19 39
-----TATACATCCACACAAAACATATA----- mirR 22 38
-----TACATCCACACAAAACATAT----- mirR 19 33
-----ATATACATCCACACAAAAC----- mirR 18 25
-----CATATACATCCACACAAAACATATA----- mirR 24 19
-----CATATACATCCACACAAAACA----- mirR 20 18
-----TATACATCCACACAAAACATA----- mirR 20 17
-----ACATATACATCCACACAAAACAT----- mirR 22 12
-----TACATCCACACAAAACATA----- mirR 18 5
-----TACATATACATCCACACAAAACAT----- mirR 23 5
-----ACATATACATCCACACAAAACATAT----- mirR 24 4
-----ATATACATCCACACAAAACATATA----- mirR 24 4
-----ATACATCCACACAAAACATATA----- mirR 21 3
-----CATATACATCCACACAAA----- mirR 18 3
-----TACATATACATCCACACAAAACATA----- mirR 24 2
-----TATACATCCACACAAAACAT----- mirR 19 2

```

```
-----TACATATACATCCACACA----- mirR 18 2
-----CATATACATCCACACAAAC----- mirR 19 2
-----ACATATACATCCACACAAACA----- mirR 21 1
-----TATACATCCACACAAACATATAC----- mirR 23 1
-----TACATCCACACAAACATATA----- mirR 20 1
-----ACATATACATCCACACAAA----- mirR 19 1
-----TACATATACATCCACACAAAC----- mirR 21 1
-----ATACATCCACACAAACAT----- mirR 18 1
-----TACATATACATCCACACAAACA----- mirR 22 1
-----TATACATCCACACAAACA----- mirR 18 1
-----AGCATGCACAGATATACACACA-- morR 22 6
-----AGCATGCACAGATATACA----- morR 18 2
-----AGCATGCACAGATATACACACAC- morR 23 2
-----AGCATGCACAGATATACACACACA morR 24 1
-----AGCATGCACAGATATACAC----- morR 19 1
-----AGCATGCACAGATATACACAC--- morR 21 1
-----TATACAAGCATGCACAGAT----- morR 19 1
-----ATACAAGCATGCACAGAT----- morR 18 1
-----AGCATGCACAGATATACACA--- morR 20 1
```

>mmu-mir-1946a

CTTAAAGAAATCTATAGCCGGGCAGTGGTGGCACACACTTTTTAATCCCAACACTTGTGAGGCACAGGCAGGTGGATTCTGATCAAAGGCATGCGCCACCACTCTCGGCTTTCTCCTCTCCTTTTTTGTAAATCTCACAAA  
CTTAAAGAAATCTATAGC-----

```
-----AGCCGGGCAGTGGTGGCACACACTTTT-----
-----AGCCGGGCAGTGGTGGCACACACTTT-----
-----GCCGGGCAGTGGTGGCACACACTTTT-----
-----GCCGGGCAGTGGTGGCACACACTTTTA-----
-----AGCCGGGCAGTGGTGGCACACA-----
-----AGCCGGGCAGTGGTGGCACACACTT-----
-----GCCGGGCAGTGGTGGCACACACTTT-----
-----AGCCGGGCAGTGGTGGCACACA-----
-----GCCGGGCAGTGGTGGCACACA-----
-----AGCCGGGCAGTGGTGGCACACACTTTTA-----
-----AGCCGGGCAGTGGTGGCACAC-----
-----GCCGGGCAGTGGTGGCACACACTT-----
-----GCCGGGCAGTGGTGGCACAC-----
-----GCCGGGCAGTGGTGGCACACAC-----
-----TAGCCGGGCAGTGGTGGCACACACTTTT-----
-----CGGGCAGTGGTGGCACACACT-----
-----CCGGGCAGTGGTGGCACACACTTTT-----
-----CGGGCAGTGGTGGCACAC-----
-----TAGCCGGGCAGTGGTGGC-----
-----ATAGCCGGGCAGTGGTGGCACACACTTTTA-----
-----CCGGGCAGTGGTGGCACACA-----
-----TAGCCGGGCAGTGGTGGCACAC-----
-----ATAGCCGGGCAGTGGTGGCACACA-----
```

-----CCGGGCAGTGGTGGCACAC-----  
-----TAGCCGGGCAGTGGTGGCACACACTTT-----  
-----TAGCCGGGCAGTGGTGGCACAC-----  
-----TAGCCGGGCAGTGGTGGCACACAC-----  
-----CGGGCAGTGGTGGCACACACTTTTA-----  
-----TAGCCGGGCAGTGGTGGCACACAC-----  
-----CCGGGCAGTGGTGGCACACACTTT-----  
-----CCGGGCAGTGGTGGCACACACTT-----  
-----ATAGCCGGGCAGTGGTGGCACAC-----  
-----CGGGCAGTGGTGGCACACAC-----  
-----CGGGCAGTGGTGGCACACACTTT-----  
-----TATAGCCGGGCAGTGGTGGCACACACT-----  
-----CCGGGCAGTGGTGGCACACAC-----  
-----ATAGCCGGGCAGTGGTGGCAC-----  
-----ATAGCCGGGCAGTGGTGGCACACACTTT-----  
-----TATAGCCGGGCAGTGGTGGCACAC-----  
-----ATAGCCGGGCAGTGGTGGCACACACTTT-----  
-----TTTGTTAATCTCACAAA-----  
-----TTTTGTTAATCTCACAA-----  
-----CTTTTTGTTAATCTCAC-----  
-----TTTTGTTAATCTCACAAA-----  
-----AA-----  
-----A-----  
-----AAA-----

>mmu-mir-190

| Species | len | reads |
|---------|-----|-------|
| morL    | 18  | 24    |
| morL    | 18  | 7     |
| morL    | 18  | 4     |
| morL    | 19  | 1     |
| mirL    | 23  | 2497  |
| mirL    | 22  | 664   |
| mirL    | 24  | 561   |
| mirL    | 19  | 118   |
| mirL    | 22  | 102   |
| mirL    | 23  | 61    |
| mirL    | 25  | 46    |
| mirL    | 21  | 34    |
| mirL    | 21  | 20    |
| mirL    | 20  | 10    |
| mirL    | 18  | 4     |
| mirL    | 20  | 1     |

```

-----GTGATATGTTTGATATATTAGGT----- mirL 23 1
-----GATATGTTTGATATATTAGGTGT----- mirL 24 1
-----TATGTTTGATATATTAGGTTG----- mirL 21 1
-----GTGATATGTTTGATATATTAGGT----- mirL 24 1
-----ACTATATATCAAGCATATTCCT----- mirR 22 441
-----CTATATATCAAGCATATTCCTA----- mirR 22 202
-----ACTATATATCAAGCATATTCCTA----- mirR 23 152
-----CTATATATCAAGCATATTCCTAC----- mirR 23 92
-----CTATATATCAAGCATATTCCT----- mirR 21 84
-----ACTATATATCAAGCATATTC----- mirR 21 24
-----ACTATATATCAAGCATATTCCTAC----- mirR 24 21
-----CTATATATCAAGCATATTCCTACA----- mirR 24 15
-----ACTATATATCAAGCATAT----- mirR 18 8
-----CTATATATCAAGCATATT----- mirR 18 5
-----ACTATATATCAAGCATATT----- mirR 19 5
-----ACTATATATCAAGCATATTCCTACA----- mirR 25 4
-----CTATATATCAAGCATATTC----- mirR 20 4
-----CTATATATCAAGCATATTC----- mirR 19 2
-----CAGTGTCTTGCCCTGTCTCCG morR 21 7
-----ACAGTGTCTTGCCCTGTC----- morR 18 2

```

>mmu-mir-697

```

ATGTTGGTCTTGACAGGTCTCAGAGGTGACTACCACACATTGAAGGGGTGGCGGTAACATCCTGGTCCTGTGGAGACTGTCATAGTCTCCTTTATTCTA species len reads
-----GTCTTGACAGGTCTCAGA----- morL 18 5
ATGTTGGTCTTGACAGGT----- morL 18 2
-----AGAGGTGACTACCACACA----- mirL 18 22
-----AGAGGTGACTACCACACAT----- mirL 19 1
-----CAGAGGTGACTACCACACAT----- mirL 20 1
-----TGAAGGGGTGGCGGTAAC----- loop 18 1
-----CATTGAAGGGGTGGCGGTAA----- loop 20 1
-----ACATTGAAGGGGTGGCGGTAAC----- loop 22 1
-----AACATCCTGGTCCTGTGGAGA----- mirR 21 4055
-----AACATCCTGGTCCTGTGGAG----- mirR 20 693
-----ACATCCTGGTCCTGTGGAGA----- mirR 20 137
-----AACATCCTGGTCCTGTGG----- mirR 18 75
-----ATCCTGGTCCTGTGGAGA----- mirR 18 58
-----CATCCTGGTCCTGTGGAGA----- mirR 19 35
-----ACATCCTGGTCCTGTGGAG----- mirR 19 33
-----AACATCCTGGTCCTGTGGAG----- mirR 19 22
-----AACATCCTGGTCCTGTGGAGAC----- mirR 22 8
-----CATCCTGGTCCTGTGGAG----- mirR 18 3
-----ACATCCTGGTCCTGTGGAG----- mirR 18 2
-----AACATCCTGGTCCTGTGGAGACT----- mirR 23 2
-----TAACATCCTGGTCCTGTG----- mirR 18 1
-----TAACATCCTGGTCCTGTGGAGA----- mirR 22 1
-----ATCCTGGTCCTGTGGAGAC----- mirR 19 1

```

```

-----GGTAACATCCTGGTCCTGT----- mirR 19 1
-----TGTCATAGTCTCCTTTAT----- morR 18 1
-----ACTGTCATAGTCTCCTTT----- morR 18 1
-----TGTCATAGTCTCCTTTATCTA morR 22 1

>mmu-mir-673
GGTCTGGCTTTGGAGCCTGAGGGGCTCACAGCTCTGGTCCTTGGAGCTCCAGAGAAAATGTTGCTCCGGGGCTGAGTTCTGTGCACCCCCCTTGCCCTCCACACTCCCCGGGGCTATGCC species len reads
--TCTGGCTTTGGAGCCTGAG----- morL 19 2
---TTTGGAGCCTGAGGGGCT----- morL 18 2
---CTGGCTTTGGAGCCTGAGG----- morL 19 1
---CTGGCTTTGGAGCCTGAGGGGCT----- morL 23 1
---GCTTTGGAGCCTGAGGGG----- morL 18 1
GGTCTGGCTTTGGAGCCTGAGGGGCT----- morL 25 1
---TTGGAGCCTGAGGGGCTC----- morL 18 1
-GTCTGGCTTTGGAGCCTGAG----- morL 20 1
-----CTCACAGCTCTGGTCCTTGA----- mirL 21 1353
-----CTCACAGCTCTGGTCCTTGGAGC----- mirL 23 964
-----CTCACAGCTCTGGTCCTTGGAG----- mirL 22 644
-----CTCACAGCTCTGGTCCTTGG----- mirL 20 402
-----CTCACAGCTCTGGTCCTTGGAGCT----- mirL 24 227
-----CTCACAGCTCTGGTCCTTG----- mirL 19 164
-----CTCACAGCTCTGGTCCTTGGAGCTC----- mirL 25 130
-----TCACAGCTCTGGTCCTTGGAGC----- mirL 22 82
-----TCACAGCTCTGGTCCTTGGAG----- mirL 21 40
-----TCACAGCTCTGGTCCTTGA----- mirL 20 25
-----TCACAGCTCTGGTCCTTGGAGCT----- mirL 23 22
-----ACAGCTCTGGTCCTTGGAG----- mirL 19 16
-----CACAGCTCTGGTCCTTGGAG----- mirL 20 14
-----GGCTCACAGCTCTGGTCC----- mirL 18 11
-----TCACAGCTCTGGTCCTTGGAGCTCC----- mirL 25 10
-----GCTCACAGCTCTGGTCCTTGA----- mirL 22 10
-----CACAGCTCTGGTCCTTGA----- mirL 19 7
-----TCACAGCTCTGGTCCTTG----- mirL 18 7
-----ACAGCTCTGGTCCTTGA----- mirL 18 7
-----TCACAGCTCTGGTCCTTGG----- mirL 19 6
-----CACAGCTCTGGTCCTTGG----- mirL 18 2
-----GGCTCACAGCTCTGGTCCT----- mirL 19 1
-----GCTCACAGCTCTGGTCCTTGGAGCTCCA----- mirL 28 1
-----GCTCACAGCTCTGGTCCTTGGAGCT----- mirL 25 1
-----GCTCACAGCTCTGGTCCT----- mirL 18 1
-----GCTCCAGAGAAAATGTTG----- loop 18 11
-----TCCAGAGAAAATGTTGCT----- loop 18 2
-----TCCGGGGCTGAGTTCTGTGCACC----- mirR 23 581
-----TCCGGGGCTGAGTTCTGTGCAC----- mirR 22 166
-----TCCGGGGCTGAGTTCTGTGCACCC----- mirR 24 56
-----TCCGGGGCTGAGTTCTGTGCA----- mirR 21 48

```



```

-----CCGGGGCTGAGTTCTGTGCACC----- mirR 22 45
-----TCCGGGGCTGAGTTCTGTGCACCCC----- mirR 25 11
-----TCCGGGGCTGAGTTCTGTGC----- mirR 20 11
-----CCGGGGCTGAGTTCTGTGCAC----- mirR 21 5
-----GGGGCTGAGTTCTGTGCACC----- mirR 20 5
-----CTCCGGGGCTGAGTTCTGTGCAC----- mirR 23 4
-----TCCGGGGCTGAGTTCTGTGCACCCC----- mirR 26 3
-----CCGGGGCTGAGTTCTGTGCACCCC----- mirR 23 2
-----CCGGGGCTGAGTTCTGTGCACCCCCT----- mirR 27 2
-----CGGGGCTGAGTTCTGTGC----- mirR 18 1
-----TGCTCCGGGGCTGAGTTCTGT----- mirR 21 1
-----CCGGGGCTGAGTTCTGTGCA----- mirR 20 1
-----GGGGCTGAGTTCTGTGCACCC----- mirR 21 1
-----CCGGGGCTGAGTTCTGTGC----- mirR 19 1
-----CTCCGGGGCTGAGTTCTGTGC----- mirR 21 1
-----TGCTCCGGGGCTGAGTTC----- mirR 18 1
-----CCGGGGCTGAGTTCTGTG----- mirR 18 1
-----CCCCCTTGCCCTCCACAC----- morR 18 5
-----CCCTTGCCCTCCCACTCC----- morR 19 4
-----CCTTGCCCTCCCACTCC----- morR 18 2
-----CTTGCCCTCCCACTCCCC----- morR 19 1
-----CCCTTGCCCTCCCACTCCC----- morR 21 1
-----CCCCTTGCCCTCCCACTCCCCGGGGCTATGCC morR 33 1
-----CCCTTGCCCTCCCACTC----- morR 19 1
-----CCTTGCCCTCCCACTCCC----- morR 19 1
-----CCCTTGCCCTCCCACT----- morR 18 1

```

>mmu-mir-1900

```

AGGTGGTGGCAGAAGCGTGGGAAGCTAGAAGAGGGCGGAGCCTGGAGGGGACACCCGGGCCGCCCTCTCTGGTCCTTCAATCCGCCCCCGCCTTATCC species len reads
AGGTGGTGGCAGAAGCGTGG----- morL 20 2
---TGGTGGCAGAAGCGTGGG----- morL 18 1
---TGGTGGCAGAAGCGTGGGA----- morL 19 1
-----AGCTAGAAGAGGGCGGAG----- mirL 18 5
-----GAAGCTAGAAGAGGGCGGAGCC----- mirL 22 1
-----CTAGAAGAGGGCGGAGCC----- mirL 18 1
-----GCCTGGAGGGGACACCCG----- loop 18 4
-----AGCCTGGAGGGGACACCC----- loop 18 3
-----CCTGGAGGGGACACCCGGG----- loop 19 3
-----GGCCGCCCTCTCTGGTCCTTCA----- mirR 22 4217
-----GGCCGCCCTCTCTGGTCCTTCA----- mirR 21 297
-----CGCCCTCTCTGGTCCTTCA----- mirR 19 122
-----GCCGCCCTCTCTGGTCCTTCA----- mirR 21 104
-----GGCCGCCCTCTCTGGTCCTT----- mirR 20 101
-----GGCCGCCCTCTCTGGTCCT----- mirR 19 74
-----GGCCGCCCTCTCTGGTCC----- mirR 18 50
-----CCGCCCTCTCTGGTCCTTCA----- mirR 20 33

```

```

-----GGGCCGCCCTCTCTGGTCCTTCA----- mirR 23 32
-----CGCCCTCTCTGGTCCTTC----- mirR 18 11
-----GGGCCGCCCTCTCTGGTC----- mirR 18 11
-----CCGGGCCGCCCTCTCTGG----- mirR 18 7
-----GGGCCGCCCTCTCTGGTCCTTCAA----- mirR 23 5
-----CGCCCTCTCTGGTCCTTC----- mirR 19 5
-----GCCGCCCTCTCTGGTCCTTC----- mirR 20 4
-----GCCGCCCTCTCTGGTCCTT----- mirR 19 4
-----CGGGGCCGCCCTCTCTGGT----- mirR 18 3
-----GCCGCCCTCTCTGGTCCT----- mirR 18 2
-----CCGCCCTCTCTGGTCCTT----- mirR 18 2
-----GGGCCGCCCTCTCTGGTCCTTCAATTC----- mirR 26 1
-----GGGCCGCCCTCTCTGGTCC----- mirR 19 1
-----CAATTCGCCCCCGCCTTA--- morR 19 1
-----TCCGCCCCCGCCTTATCC morR 18 1

```

>mmu-mir-468

| Species | len | reads |
|---------|-----|-------|
| morL    | 18  | 4     |
| morL    | 19  | 3     |
| morL    | 20  | 1     |
| mirL    | 18  | 3     |
| mirL    | 21  | 1     |
| mirL    | 21  | 1     |
| mirL    | 19  | 1     |
| mirL    | 19  | 1     |
| mirR    | 23  | 3481  |
| mirR    | 22  | 619   |
| mirR    | 21  | 391   |
| mirR    | 22  | 149   |
| mirR    | 21  | 103   |
| mirR    | 20  | 96    |
| mirR    | 20  | 27    |
| mirR    | 24  | 21    |
| mirR    | 19  | 14    |
| mirR    | 19  | 13    |
| mirR    | 21  | 10    |
| mirR    | 20  | 10    |
| mirR    | 18  | 7     |
| mirR    | 26  | 4     |
| mirR    | 19  | 3     |
| mirR    | 20  | 3     |
| mirR    | 24  | 2     |
| mirR    | 18  | 1     |
| mirR    | 23  | 1     |
| mirR    | 18  | 1     |

```

-----GATATGACTGATGTGCGTGTGT----- mirR 22 1
-----ATGACTGATGTGCGTGTGT----- mirR 19 1
-----ATATGACTGATGTGCGTGTGTC----- mirR 22 1
-----CTGCTGGGAGGACACAC----- morR 18 19
-----TCTGGGAGGACACACGTG morR 18 2

>mmu-mir-206
GGAGGACACAGCTTCCCCAGGCCACATGCTTCTTTATATCCTCATAGATATCTCAGCACTATGGAATGTAAGGAAGTGTGTGGTTTTGGCAAGTGCTTCTTCAA species len reads
--AGGACACAGCTTCCCCAG----- morL 18 3
---GACACAGCTTCCCCAGGCC----- morL 19 1
GGAGGACACAGCTTCCCCA----- morL 19 1
-----CCACATGCTTCTTTATAT----- mirL 18 41
-----ACATGCTTCTTTATATCCTCATA----- mirL 23 27
-----CCACATGCTTCTTTATATCC----- mirL 20 3
-----AGGCCACATGCTTCTTTA----- mirL 18 2
-----GCCACATGCTTCTTTATATCCT----- mirL 22 1
-----ACATGCTTCTTTATATCCTCAT----- mirL 22 1
-----TCATAGATATCTCAGCAC----- loop 18 3
-----CATAGATATCTCAGCACT----- loop 18 2
-----TGGAATGTAAGGAAGTGTGTGG----- mirR 22 3966
-----TGGAATGTAAGGAAGTGTGTGGT----- mirR 23 177
-----TGGAATGTAAGGAAGTGTGTG----- mirR 21 169
-----GGAATGTAAGGAAGTGTGTGG----- mirR 21 156
-----TGGAATGTAAGGAAGTGTGT----- mirR 20 144
-----TGGAATGTAAGGAAGTGTGTGGTT----- mirR 24 101
-----TGGAATGTAAGGAAGTGTGTGGTTT----- mirR 25 39
-----TGGAATGTAAGGAAGTGTG----- mirR 19 32
-----ATGGAATGTAAGGAAGTGTGTGG----- mirR 23 31
-----GGAATGTAAGGAAGTGTGT----- mirR 19 10
-----GGAATGTAAGGAAGTGTGTGGT----- mirR 22 9
-----GGAATGTAAGGAAGTGTGTGGTT----- mirR 23 8
-----GGAATGTAAGGAAGTGTGTG----- mirR 20 5
-----GGAATGTAAGGAAGTGTG----- mirR 18 3
-----GGAATGTAAGGAAGTGTGTGGTTT----- mirR 24 2
-----GAATGTAAGGAAGTGTGTGG----- mirR 20 2
-----ATGGAATGTAAGGAAGTGTGTG----- mirR 22 1
-----GAATGTAAGGAAGTGTGT----- mirR 18 1
-----ATGGAATGTAAGGAAGTGTGTGGTTT----- mirR 26 1
-----ATGGAATGTAAGGAAGTGTGTGGTT----- mirR 25 1
-----ATGGAATGTAAGGAAGTGTGTGGT----- mirR 24 1
-----CTATGGAATGTAAGGAAGTG----- mirR 20 1
-----TGGCAAGTGCTTCTTCAA morR 18 2
-----GGTTTTGGCAAGTGCTTCT----- morR 19 1
-----TTTGGCAAGTGCTTCTTC-- morR 18 1
-----TTTTGGCAAGTGCTTCTTC-- morR 19 1

```

>mmu-mir-449b

| Sequence                                                                         | species | len | reads |
|----------------------------------------------------------------------------------|---------|-----|-------|
| GAAGTTGCCAGACTCGGGTAGGCAGTGTGTTAGCTGGCTGCGTTGGGTCAGGCCAGCAGCCACAGCTACCCTGCCACTTC | morL    | 18  | 2     |
| -AACTTGCCAGACTCGGGT-----                                                         | morL    | 18  | 1     |
| GAAGTTGCCAGACTCGGG-----                                                          | morL    | 18  | 1     |
| --ACTTGCCAGACTCGGGTA-----                                                        | morL    | 18  | 1     |
| -----AGGCAGTGTGTTAGCTGGC-----                                                    | mirL    | 20  | 104   |
| -----AGGCAGTGTGTTAGCTGG-----                                                     | mirL    | 19  | 63    |
| -----GGCAGTGTGTTAGCTGGC-----                                                     | mirL    | 19  | 20    |
| -----AGGCAGTGTGTTAGCTG-----                                                      | mirL    | 18  | 6     |
| -----AGGCAGTGTGTTAGCTGGCTG-----                                                  | mirL    | 22  | 5     |
| -----TAGGCAGTGTGTTAGCTGGCT-----                                                  | mirL    | 22  | 4     |
| -----TAGGCAGTGTGTTAGCTGGCTG-----                                                 | mirL    | 23  | 3     |
| -----AGGCAGTGTGTTAGCTGGCT-----                                                   | mirL    | 21  | 3     |
| -----CAGTGTGTTAGCTGGCT-----                                                      | mirL    | 18  | 3     |
| -----AGGCAGTGTGTTAGCTGGCTGC-----                                                 | mirL    | 23  | 2     |
| -----GTAGGCAGTGTGTTAGC-----                                                      | mirL    | 18  | 2     |
| -----TAGGCAGTGTGTTAGCTGGC-----                                                   | mirL    | 21  | 2     |
| -----GCAGTGTGTTAGCTGGCT-----                                                     | mirL    | 19  | 1     |
| -----GCAGTGTGTTAGCTGGC-----                                                      | mirL    | 18  | 1     |
| -----CAGTGTGTTAGCTGGCTG-----                                                     | mirL    | 19  | 1     |
| -----GGCAGTGTGTTAGCTGG-----                                                      | mirL    | 18  | 1     |
| -----AGGCAGTGTGTTAGCTGGCTGCGTT-----                                              | mirL    | 26  | 1     |
| -----CGTTGGGTCAGGCCAGCAG-----                                                    | loop    | 19  | 2     |
| -----CTGCGTTGGGTCAGGCCA-----                                                     | loop    | 18  | 1     |
| -----GGCTGCGTTGGGTCAGGCC-----                                                    | loop    | 19  | 1     |
| -----CAGCCACAGCTACCCTGCCACT--                                                    | mirR    | 22  | 4403  |
| -----CAGCCACAGCTACCCTGCCAC--                                                     | mirR    | 21  | 64    |
| -----AGCCACAGCTACCCTGCCACT--                                                     | mirR    | 21  | 55    |
| -----CAGCCACAGCTACCCTGCCA----                                                    | mirR    | 20  | 49    |
| -----CAGCCACAGCTACCCTGCC-----                                                    | mirR    | 19  | 46    |
| -----CAGCCACAGCTACCCTGC-----                                                     | mirR    | 18  | 30    |
| -----GCCACAGCTACCCTGCCACT--                                                      | mirR    | 20  | 26    |
| -----CCACAGCTACCCTGCCACT--                                                       | mirR    | 19  | 13    |
| -----AGCCACAGCTACCCTGCCACTTC                                                     | mirR    | 23  | 3     |
| -----AGCCACAGCTACCCTGCCACTT-                                                     | mirR    | 22  | 3     |
| -----AGCCACAGCTACCCTGCC-----                                                     | mirR    | 18  | 3     |
| -----GCCACAGCTACCCTGCCA----                                                      | mirR    | 18  | 2     |
| -----CAGCCACAGCTACCCTGCCACTT-                                                    | mirR    | 23  | 2     |
| -----AGCCACAGCTACCCTGCCA----                                                     | mirR    | 19  | 1     |
| -----AGCAGCCACAGCTACCCT-----                                                     | mirR    | 18  | 1     |

>mmu-mir-141

| Sequence                                                                                                    | species | len | reads |
|-------------------------------------------------------------------------------------------------------------|---------|-----|-------|
| TATATTGGCTGGCTCTGGGTCCATCTTCCAGTGCAGTGTGGATGGTTGAAGTATGAAGCTCCTAACACTGTCTGGTAAAGATGGCCCCGGGTCAGTTCCTTCAGCAG | morL    | 18  | 5     |
| --TATTGGCTGGCTCTGGGT-----                                                                                   | morL    | 19  | 3     |
| ---ATTGGCTGGCTCTGGGTCC-----                                                                                 | morL    | 18  | 1     |

|                                       |      |    |     |
|---------------------------------------|------|----|-----|
| -----GGCTGGCTCTGGGTCCAT-----          | morL | 18 | 1   |
| TATATTGGCTGGCTCTGG-----               | morL | 18 | 1   |
| -----CATCTTCCAGTGCAGTGTGG-----        | mirL | 22 | 391 |
| -----TCCATCTTCCAGTGCAGTGTGG-----      | mirL | 23 | 201 |
| -----CATCTTCCAGTGCAGTGTGG-----        | mirL | 20 | 153 |
| -----CATCTTCCAGTGCAGTGTGG-----        | mirL | 21 | 151 |
| -----TCCATCTTCCAGTGCAGTGTGG-----      | mirL | 24 | 148 |
| -----TCCATCTTCCAGTGCAGTGTGG-----      | mirL | 22 | 112 |
| -----TCCATCTTCCAGTGCAGTGTGG-----      | mirL | 21 | 98  |
| -----CATCTTCCAGTGCAGTGTGGATG-----     | mirL | 24 | 49  |
| -----TCCATCTTCCAGTGCAGTGTGG-----      | mirL | 20 | 33  |
| -----CATCTTCCAGTGCAGTGTGG-----        | mirL | 19 | 29  |
| -----TCCATCTTCCAGTGCAGTGTGGAT-----    | mirL | 25 | 19  |
| -----CCATCTTCCAGTGCAGTGTGG-----       | mirL | 21 | 15  |
| -----CATCTTCCAGTGCAGTGTGGAT-----      | mirL | 23 | 13  |
| -----ATCTTCCAGTGCAGTGTGG-----         | mirL | 19 | 12  |
| -----ATCTTCCAGTGCAGTGTGG-----         | mirL | 20 | 10  |
| -----CCATCTTCCAGTGCAGTGTGG-----       | mirL | 22 | 10  |
| -----TCTTCCAGTGCAGTGTGG-----          | mirL | 19 | 9   |
| -----CATCTTCCAGTGCAGTGTGG-----        | mirL | 18 | 8   |
| -----CCATCTTCCAGTGCAGTGTGG-----       | mirL | 23 | 8   |
| -----TCCATCTTCCAGTGCAGTGTGG-----      | mirL | 18 | 7   |
| -----ATCTTCCAGTGCAGTGTGG-----         | mirL | 21 | 4   |
| -----TCTTCCAGTGCAGTGTGG-----          | mirL | 20 | 2   |
| -----TCTTCCAGTGCAGTGTGG-----          | mirL | 18 | 2   |
| -----CCATCTTCCAGTGCAGTGTGGATG-----    | mirL | 25 | 1   |
| -----CCATCTTCCAGTGCAGTGTGGATGG-----   | mirL | 26 | 1   |
| -----TGTTGAAGTATGAAGCTCC-----         | loop | 20 | 30  |
| -----TGTTGAAGTATGAAGCTC-----          | loop | 19 | 13  |
| -----TGTTGAAGTATGAAGCTCCT-----        | loop | 21 | 5   |
| -----TGTTGAAGTATGAAGCT-----           | loop | 18 | 4   |
| -----ATGGTTGAAGTATGAAGC-----          | loop | 18 | 2   |
| -----TAACACTGTCTGGTAAAGATGGCCC-----   | mirR | 25 | 642 |
| -----TAACACTGTCTGGTAAAGATGGC-----     | mirR | 23 | 616 |
| -----TAACACTGTCTGGTAAAGATGGCC-----    | mirR | 24 | 471 |
| -----TAACACTGTCTGGTAAAGATGG-----      | mirR | 22 | 418 |
| -----TAACACTGTCTGGTAAAGATGGCCCC-----  | mirR | 26 | 408 |
| -----AACACTGTCTGGTAAAGATGG-----       | mirR | 21 | 136 |
| -----TAACACTGTCTGGTAAAGATG-----       | mirR | 21 | 128 |
| -----AACACTGTCTGGTAAAGATGGCCC-----    | mirR | 24 | 114 |
| -----AACACTGTCTGGTAAAGATGGC-----      | mirR | 22 | 76  |
| -----AACACTGTCTGGTAAAGATGGCCCC-----   | mirR | 25 | 75  |
| -----TAACACTGTCTGGTAAAGATGGCCCCC----- | mirR | 27 | 69  |
| -----AACACTGTCTGGTAAAGATGGCC-----     | mirR | 23 | 57  |
| -----AACACTGTCTGGTAAAGATG-----        | mirR | 20 | 23  |
| -----AACACTGTCTGGTAAAGATGGCCCCC-----  | mirR | 26 | 20  |

```

-----CTAACACTGTCTGGTAAAGATGGC----- mirR 24 12
-----ACACTGTCTGGTAAAGATGGCCC----- mirR 23 11
-----TCCTAACACTGTCTGGTA----- mirR 18 3
-----CTAACACTGTCTGGTAAAGATG----- mirR 22 2
-----ACACTGTCTGGTAAAGATGGC----- mirR 21 2
-----CTAACACTGTCTGGTAAAGATGGCCC----- mirR 26 1
-----CCTAACACTGTCTGGTAA----- mirR 18 1
-----ACACTGTCTGGTAAAGATGGCCCC----- mirR 24 1
-----CTAACACTGTCTGGTAAAGAT----- mirR 21 1
-----ACACTGTCTGGTAAAGATGG----- mirR 20 1
-----CACTGTCTGGTAAAGATGGCCCC----- mirR 23 1
-----CGGGTCAGTTCCTTCAGC----- morR 18 1
-----CCCCGGGTCAGTTCCTTCA----- morR 19 1
-----CCCCGGGTCAGTTCCTTC----- morR 19 1
-----CCCCGGGTCAGTTCCTTC----- morR 18 1
-----GGGTCAGTTCCTTCAGCAG morR 19 1

```

>mmu-mir-202

```

CATTCTCGCTGGCTGTTCCCTTTTTCCTATGCATATACTTCTTTGTGGATCTGGTCTAAAGAGGTATAGCGCATGGGAAGATGGAGCAGTGAGATCTTCCCC species len reads
CATTCTCGCTGGCTGTTCCCTTTTTCCTATGCATATACTTCTTTGTGGATCTGGTCTAAAGAGGTATAGCGCATGGGAAGATGGAGCAGTGAGATCTTCCCC morL 18 4
-----CGCTGGCTGTTCCCTTTT----- morL 18 3
-----TTTCCTATGCATATACTTCTTT----- mirL 22 852
-----TTCCTATGCATATACTTCTTT----- mirL 21 441
-----TTCCTATGCATATACTTCTTTG----- mirL 22 226
-----TTCCTATGCATATACTTCTT----- mirL 20 142
-----TTTCCTATGCATATACTTCTT----- mirL 21 89
-----TTCCTATGCATATACTTCT----- mirL 19 52
-----TTTCCTATGCATATACTTCT----- mirL 20 52
-----TCCTATGCATATACTTCTTT----- mirL 20 52
-----TCCTATGCATATACTTCTTTG----- mirL 21 24
-----TTCCTATGCATATACTTCT----- mirL 18 22
-----TTTCCTATGCATATACTTCT----- mirL 19 20
-----TTTCCTATGCATATACTT----- mirL 18 17
-----TCCTATGCATATACTTCTT----- mirL 19 16
-----CCTATGCATATACTTCTTT----- mirL 19 14
-----TTCCTATGCATATACTTCTTTGTGGA----- mirL 26 12
-----TTTCCTATGCATATACTTCTTT----- mirL 23 5
-----TTTCCTATGCATATACTTCTTTG----- mirL 23 4
-----TTTTTCCTATGCATATAC----- mirL 18 3
-----TCCTATGCATATACTTCT----- mirL 18 2
-----CCTATGCATATACTTCTT----- mirL 18 2
-----TTCCTATGCATATACTTCTTTGT----- mirL 23 2
-----AGAGGTATAGCGCATGGGAAGA----- mirR 22 1724
-----AGAGGTATAGCGCATGGGAAG----- mirR 21 425
-----AGAGGTATAGCGCATGGGA----- mirR 20 261
-----GAGGTATAGCGCATGGGAAGA----- mirR 21 64

```

```

-----GGTATAGCGCATGGGAAGA----- mirR 19 60
-----AGGTATAGCGCATGGGAAGA----- mirR 20 39
-----AGAGGTATAGCGCATGGGA----- mirR 19 25
-----GGTATAGCGCATGGGAAG----- mirR 18 17
-----GAGGTATAGCGCATGGGA----- mirR 19 17
-----AAGAGGTATAGCGCATGGGAAGA----- mirR 23 16
-----AGGTATAGCGCATGGGA----- mirR 18 13
-----GAGGTATAGCGCATGGGAAG----- mirR 20 11
-----AGAGGTATAGCGCATGGG----- mirR 18 6
-----AGGTATAGCGCATGGGAAG----- mirR 19 4
-----AGAGGTATAGCGCATGGGAAGAT----- mirR 23 3
-----AGGTATAGCGCATGGGAAGAT----- mirR 21 2
-----GAGGTATAGCGCATGGGA----- mirR 18 1
-----AAGAGGTATAGCGCATGGGA----- mirR 21 1
-----TGGAGCAGTGAGATCTTC--- morR 18 17
-----TGGAGCAGTGAGATCTTCCC- morR 20 3
-----ATGGAGCAGTGAGATCTT--- morR 18 2
-----AGCAGTGAGATCTTCCCC morR 18 1
-----GATGGAGCAGTGAGATCTT--- morR 19 1

```

>mmu-mir-1933

```

CTCAGCATATCTGTCTGATCCACAGTCATGGTGTTCGGTCTTAGTTTGTGACCAGTTTGTAGTTTAAACCAGGACCATCAGTGTGACTATTGGATTGGGACTATCCACTG species len reads
CTCAGCATATCTGTCTGCTG----- morL 18 1
---AGCATATCTGTCTGATC----- morL 18 1
CTCAGCATATCTGTCTGAT----- morL 20 1
-----ATCCCACAGTCATGGTGT----- mirL 18 755
-----ATCCCACAGTCATGGTGT----- mirL 19 46
-----TCCCACAGTCATGGTGT----- mirL 18 9
-----TGATCCCACAGTCATGGT----- mirL 18 2
-----CCAGGACCATCAGTGTGACTAT----- mirR 22 2515
-----CCAGGACCATCAGTGTGACTA----- mirR 21 843
-----CCAGGACCATCAGTGTGACT----- mirR 20 252
-----CAGGACCATCAGTGTGACTAT----- mirR 21 52
-----AGGACCATCAGTGTGACTAT----- mirR 20 41
-----CCAGGACCATCAGTGTGA----- mirR 18 33
-----CCAGGACCATCAGTGTGACTATT----- mirR 23 27
-----AGGACCATCAGTGTGACTA----- mirR 19 26
-----CCAGGACCATCAGTGTGAC----- mirR 19 24
-----CAGGACCATCAGTGTGAC----- mirR 18 21
-----CAGGACCATCAGTGTGACTATT----- mirR 22 20
-----CAGGACCATCAGTGTGACTA----- mirR 20 17
-----AGGACCATCAGTGTGACT----- mirR 18 9
-----GGACCATCAGTGTGACTAT----- mirR 19 5
-----CAGGACCATCAGTGTGACT----- mirR 19 3
-----GGACCATCAGTGTGACTA----- mirR 18 3
-----CCAGGACCATCAGTGTGACTATTG----- mirR 24 2

```

```
-----ACCAGGACCATCAGTGTGACT----- mirR 21 1
-----ACCAGGACCATCAGTGTGACTA----- mirR 22 1
-----TTGGATTGGGACTATCCA--- morR 18 2
-----GGATTGGGACTATCCACT- morR 18 2
-----GATTGGGACTATCCACTG morR 18 1
```

>mmu-mir-802

```
GGTCCTATTATTGCAATCAGTAACAAAGATTCATCCTTGTGTCAATCATAACAACACGGAGAGTCTTTGTCACTCAGTGTAAATTAATAGCCTTCAC species len reads
GGTCCTATTATTGCAAT----- morL 18 1
-----TCAGTAACAAAGATTCATCCT----- mirL 21 1490
-----CAGTAACAAAGATTCATCCTTG----- mirL 22 874
-----TCAGTAACAAAGATTCATCCTT----- mirL 22 809
-----CAGTAACAAAGATTCATCCTTGT----- mirL 23 537
-----TCAGTAACAAAGATTCATCCT----- mirL 20 372
-----CAGTAACAAAGATTCATCCTT----- mirL 21 168
-----CAGTAACAAAGATTCATCCT----- mirL 20 149
-----TCAGTAACAAAGATTCATC----- mirL 19 63
-----CAGTAACAAAGATTCATCCT----- mirL 19 61
-----AGTAACAAAGATTCATCCT----- mirL 19 31
-----GTAACAAAGATTCATCCT----- mirL 18 30
-----CAGTAACAAAGATTCATCCTTGTG----- mirL 24 15
-----CAGTAACAAAGATTCATC----- mirL 18 12
-----AGTAACAAAGATTCATCCTTG----- mirL 21 9
-----AGTAACAAAGATTCATCCTT----- mirL 20 8
-----GTAACAAAGATTCATCCTT----- mirL 19 7
-----TCAGTAACAAAGATTCATCCTTG----- mirL 23 6
-----GTAACAAAGATTCATCCTTG----- mirL 20 4
-----TCAGTAACAAAGATTCAT----- mirL 18 3
-----AGTAACAAAGATTCATCCTTGT----- mirL 22 2
-----AATCAGTAACAAAGATTC----- mirL 18 2
-----TCAGTAACAAAGATTCATCCTTGT----- mirL 24 2
-----ATCAGTAACAAAGATTCATCCTT----- mirL 23 1
-----TTGTGTCAATCATAACA----- loop 18 4
-----ACGGAGAGTCTTTGTCACTC----- mirR 20 7
-----GGAGAGTCTTTGTCACTC----- mirR 18 6
-----CACGGAGAGTCTTTGTCA----- mirR 18 3
-----CGGAGAGTCTTTGTCACTC----- mirR 19 2
-----ACACGGAGAGTCTTTGTCT----- mirR 18 1
-----ACGGAGAGTCTTTGTCACTCAG----- mirR 22 1
-----ACGGAGAGTCTTTGTCACTCA----- mirR 21 1
-----GGAGAGTCTTTGTCACTCAGT----- mirR 21 1
-----CACGGAGAGTCTTTGTCACT----- mirR 19 1
-----ACGGAGAGTCTTTGTCACT----- mirR 18 1
-----GTGTAATTAATAGCCTTCAC morR 20 1
```

>mmu-mir-710



```

ATCTCTCTCGTCAAATAGAAGCCAAGTCTTGGGGAGAGTTGAGCTTGGTGTGAAAACTGACATACCCCTTCAACTCTTTAGAACTTAGGTATCTGAAGTGGAGTGGATGGAGTAGTTCCTAAAAATAAAAGGTAGGA spe
ATCTCTCTCGTCAAATAGAAGC-----CTCTCTCGTCAAATAGAAGC-----mor
-----CTCTCTCGTCAAATAGAAGC-----mor
-----CTCTCTCGTCAAATAGAAGC-----mor
-----CCAAGTCTTGGGGAGAGTTGA-----mir
-----CCAAGTCTTGGGGAGAGTTGAG-----mir
-----CCAAGTCTTGGGGAGAGTTG-----mir
-----CCAAGTCTTGGGGAGAGTT-----mir
-----AGTCTTGGGGAGAGTTGAG-----mir
-----AGTCTTGGGGAGAGTTGA-----mir
-----CCAAGTCTTGGGGAGAGT-----mir
-----CAAGTCTTGGGGAGAGTTGA-----mir
-----AAGTCTTGGGGAGAGTTGAG-----mir
-----CAAGTCTTGGGGAGAGTTGAG-----mir
-----AAGTCTTGGGGAGAGTTGA-----mir
-----CAAGTCTTGGGGAGAGTTG-----mir
-----CCAAGTCTTGGGGAGAGTTGAGC-----mir
-----GCCAAGTCTTGGGGAGAG-----mir
-----CAAGTCTTGGGGAGAGTT-----mir
-----GAGTGGATGGAGTAGTTC-----mir
-----GGAGTGGATGGAGTAGTTC-----mir
-----AGTGGATGGAGTAGTTC-----mir
-----GGAGTGGATGGAGTAGTTCCT-----mir
-----GGAGTGGATGGAGTAGTT-----mir
-----AGTGGATGGAGTAGTTCCT-----mir
-----GTGGATGGAGTAGTTCCTA-----mir
-----GTGGATGGAGTAGTTCCT-----mir
-----CTAAAAATAAAAGGTAGGA mor
-----TCCTAAAAATAAAAGGTA--- mor
-----TCCTAAAAATAAAAGGTAG-- mor

```

>mmu-mir-1903

| Sequence                                                                                                        | species | len | reads |
|-----------------------------------------------------------------------------------------------------------------|---------|-----|-------|
| CAACTCCTCCCCTCTTTTTTTCCTCCTTCTTCTTCTCCTGAGACATGGCCCGGGCAGTGGCTCCTGGAAGAGGAACAAGTGTGGGAAAAGGGAGAGGAAATCGGAGCTAAA | morL    | 18  | 26    |
| ---TCCTCCCCTCTTTTTTTT---                                                                                        | morL    | 19  | 14    |
| ---CTCCTCCCCTCTTTTTTTT---                                                                                       | morL    | 18  | 9     |
| ---TCCCTCCCCTCTTTTTTTT---                                                                                       | morL    | 19  | 6     |
| ---CTCCTCCCCTCTTTTTTTT---                                                                                       | morL    | 20  | 5     |
| ---CTCCCCTCTTTTTTTTCCT---                                                                                       | morL    | 19  | 4     |
| ---CTCCCCTCTTTTTTTTCC---                                                                                        | morL    | 18  | 4     |
| ---ACTCCTCCCCTCTTTTTTTT---                                                                                      | morL    | 20  | 4     |
| ---CCCTCTTTTTTTTCCTCC---                                                                                        | morL    | 18  | 3     |
| ---CCTCTTTTTTTTCCTCCT---                                                                                        | morL    | 18  | 3     |
| ---CCCCTCTTTTTTTTCCTC---                                                                                        | morL    | 18  | 3     |
| ---CCCCTCTTTTTTTTCCTCCT---                                                                                      | morL    | 20  | 2     |
| ---TCCTCCCCTCTTTTTTTTCC---                                                                                      | morL    | 20  | 2     |

```

-----CCCTCTTTTTTTTCCTCCT----- morL 19 1
-----CCTCCCCTCTTTTTTTCCT----- morL 20 1
-----TCCCCTCTTTTTTTTCCTCC----- morL 20 1
-----CTCCCCTCTTTTTTTCCTC----- morL 20 1
-----TCCCCTCTTTTTTTTCCTC----- morL 19 1
--ACTCCTCCCCTCTTTTTTTC----- morL 21 1
-----CCCCTCTTTTTTTTCCTCC----- morL 19 1
--ACTCCTCCCCTCTTTTTTTCCT----- morL 23 1
-----TCCCCTCTTTTTTTTCCT----- morL 18 1
CAACTCCTCCCCTCTTTTTTTC----- morL 22 1
-----CCTCCCCTCTTTTTTTC----- morL 19 1
-----CCTTCTTCTTCTCCTGAGACA----- mirL 22 3758
-----CCTTCTTCTTCTCCTGAGAC----- mirL 21 261
-----CTTCTTCTTCTCCTGAGACA----- mirL 21 104
-----TCTTCTTCTTCTCCTGAGACA----- mirL 19 67
-----CCTTCTTCTTCTCCTGAGA----- mirL 20 42
-----CCTTCTTCTTCTCCTGA----- mirL 18 37
-----CCTTCTTCTTCTCCTGAGACAT----- mirL 23 32
-----TTCTTCTTCTTCTCCTGAGACA----- mirL 20 31
-----CCTTCTTCTTCTCCTGAG----- mirL 19 25
-----CTCCTTCTTCTTCTCCT----- mirL 18 16
-----TCTTCTTCTTCTCCTGAGAC----- mirL 18 8
-----CTTCTTCTTCTTCTCCTGAGAC----- mirL 20 7
-----CTTCTTCTTCTTCTCCTGAGACAT----- mirL 22 5
-----CCTCCTTCTTCTTCTCCTG----- mirL 20 4
-----CTCCTTCTTCTTCTCCTG----- mirL 19 3
-----TCCTTCTTCTTCTTCTCCTGAGACA----- mirL 23 3
-----CCTCCTTCTTCTTCTCCT----- mirL 19 2
-----CTTCTTCTTCTTCTCCTGAG----- mirL 18 2
-----CTCCTTCTTCTTCTTCTCCTGA----- mirL 20 2
-----CCTCCTTCTTCTTCTTCTCCTGAGACA----- mirL 25 1
-----CCTCCTTCTTCTTCTTCTC----- mirL 18 1
-----TCCTTCTTCTTCTTCTCCTGA----- mirL 19 1
-----TCCTTCTTCTTCTTCTCCTG----- mirL 18 1
-----TTCTTCTTCTTCTCCTGAGA----- mirL 18 1
-----CTCCTTCTTCTTCTTCTCCTGAGA----- mirL 22 1
-----AGTGTGGGAAAAGGGAGA----- mirR 18 53
-----AGTGTGGGAAAAGGGAGAG----- mirR 19 4
-----GTGTGGGAAAAGGGAGAG----- mirR 18 2
-----ACAAGTGTGGGAAAAGGG----- mirR 18 1
-----AAGTGTGGGAAAAGGGAGA----- mirR 19 1
-----GAGGAAATCGGAGCTAAA----- morR 18 1

```

```

>mmu-mir-466n
ATGTGTGTATATGAATATGCATATACATGAGAGCATAACATAGACACACGTGCATGTGCGCTTGCATGC species len reads
ATGTGTGTATATGAATATG----- loop 19 1

```

```

-----TATACATGAGAGCATAACATAGA----- mirR 22 2926
-----TATACATGAGAGCATAACATAG----- mirR 21 554
-----TATACATGAGAGCATAACATAGAC----- mirR 23 226
-----ATATACATGAGAGCATAACAT----- mirR 20 170
-----ATACATGAGAGCATAACATAGA----- mirR 21 159
-----ATATACATGAGAGCATAACATA----- mirR 21 106
-----ATATACATGAGAGCATAACATAG----- mirR 22 66
-----ATACATGAGAGCATAACATAGAC----- mirR 22 65
-----TATACATGAGAGCATAACATA----- mirR 20 57
-----ATACATGAGAGCATAACATAG----- mirR 20 49
-----TATACATGAGAGCATAACATAGACA----- mirR 24 31
-----ATATACATGAGAGCATAACATAGA----- mirR 23 27
-----TATACATGAGAGCATAACAT----- mirR 19 18
-----ATATACATGAGAGCATAACA----- mirR 19 12
-----GCATATACATGAGAGCATAACAT----- mirR 22 10
-----ATATACATGAGAGCATAAC----- mirR 18 10
-----TATACATGAGAGCATAACA----- mirR 18 7
-----ATACATGAGAGCATAACATAGACA----- mirR 23 6
-----CATATACATGAGAGCATAACATA----- mirR 22 5
-----CATATACATGAGAGCATAACA----- mirR 20 3
-----ATACATGAGAGCATAACAT----- mirR 18 3
-----ATACATGAGAGCATAACATA----- mirR 19 3
-----TACATGAGAGCATAACATAGA----- mirR 20 2
-----ACATGAGAGCATAACATAGACACAC----- mirR 24 1
-----CATATACATGAGAGCATAACAT----- mirR 21 1
-----CATATACATGAGAGCATAAC----- mirR 19 1
-----CATATACATGAGAGCATAACATAG----- mirR 23 1
-----ATACATGAGAGCATAACATAGACAC----- mirR 24 1
-----ATATACATGAGAGCATAACATAGAC----- mirR 24 1
-----CACACGTGCATGTGCGCTTGC----- morR 21 8
-----CACACGTGCATGTGCGCTTG----- morR 20 3
-----ACGTGCATGTGCGCTTGCATGC----- morR 22 3
-----ACACGTGCATGTGCGCTTG----- morR 19 1
-----AGACACACGTGCATGTGCGC----- morR 20 1
-----CACACGTGCATGTGCGCT----- morR 18 1

>mmu-mir-1306
CCTGCAAACGTCCAGTGATGCAGAGGTAATGGACGTTGGCTCTGGTGGTGATGGACAGTCCGAACCTCTGCCGACGACCCATTCAACTTCTACGGAGCTTCTTCTCTCT species len reads
-----GTGATGCAGAGGTAATGG----- morL 18 3
CCTGCAAACGTCCAGTGATGCAGAGGTAATGGAC----- morL 34 2
-----AGTGATGCAGAGGTAATGG----- morL 19 2
-----GTGATGCAGAGGTAATGGA----- morL 19 2
-----CAGTGATGCAGAGGTAAT----- morL 18 1
-----AGTGATGCAGAGGTAATG----- morL 18 1
-----AGTGATGCAGAGGTAATGGA----- morL 20 1
-----ATGCAGAGGTAATGGAC----- morL 18 1

```

```

-----ACGTTGGCTCTGGTGGTGATG----- mirL 21 1927
-----ACGTTGGCTCTGGTGGTG----- mirL 18 759
-----GACGTTGGCTCTGGTGGTGATG----- mirL 22 619
-----ACGTTGGCTCTGGTGGTGA----- mirL 19 286
-----GACGTTGGCTCTGGTGGTGAT----- mirL 21 197
-----ACGTTGGCTCTGGTGGTGATGG----- mirL 22 154
-----ACGTTGGCTCTGGTGGTGAT----- mirL 20 116
-----GACGTTGGCTCTGGTGGTGA----- mirL 20 92
-----GACGTTGGCTCTGGTGGTGATGG----- mirL 23 86
-----CGTTGGCTCTGGTGGTGATG----- mirL 20 38
-----TGGACGTTGGCTCTGGTGGTGA----- mirL 22 35
-----GACGTTGGCTCTGGTGGTG----- mirL 19 27
-----GACGTTGGCTCTGGTGGTGATGGA----- mirL 24 26
-----GTTGGCTCTGGTGGTGATG----- mirL 19 23
-----GGACGTTGGCTCTGGTGGTGA----- mirL 21 22
-----ACGTTGGCTCTGGTGGTGATGGAC----- mirL 24 21
-----ACGTTGGCTCTGGTGGTGATGGA----- mirL 23 16
-----GACGTTGGCTCTGGTGGTGATGGAC----- mirL 25 9
-----GGACGTTGGCTCTGGTGGTG----- mirL 20 5
-----TGGACGTTGGCTCTGGTGGTGAT----- mirL 23 3
-----GTTGGCTCTGGTGGTGAT----- mirL 18 2
-----GGACGTTGGCTCTGGTGGTGAT----- mirL 22 2
-----TTGGCTCTGGTGGTGATG----- mirL 18 2
-----TGGACGTTGGCTCTGGTGGT----- mirL 20 1
-----GGACGTTGGCTCTGGTGGTGATG----- mirL 23 1
-----ATGGACAGTCCGAACCTC----- loop 18 1
-----CTCCTGCCGACGACCCATTCAA----- mirR 22 8
-----CCTCCTGCCGACGACCCA----- mirR 18 2
-----TCCTGCCGACGACCCATT----- mirR 18 1
-----ACCTCCTGCCGACGACCC----- mirR 18 1
-----CTGCCGACGACCCATTCAA----- mirR 19 1
-----TTCTACGGAGCTTCTCTTCTC----- morR 21 6
-----ACTTCTACGGAGCTTCTC----- morR 18 1
-----CTACGGAGCTTCTCTTCTCT----- morR 20 1

```

>mmu-mir-878

```

AGTGTGTGTGCAATGCTTTATCTAGTTGGATGTCAAGACACGTGAACTTAAGTGCATGACACCACACTGGGTAGAGGAGGGCTCACAGTGTTCCTC species len reads
-GTGTGTGTGCAATGCTTT----- morL 19 2
AGTGTGTGTGCAATGCTTT----- morL 20 1
-----TTGTGTGCAATGCTTTAT----- morL 18 1
-----TATCTAGTTGGATGTCAAGACA----- mirL 22 382
-----TATCTAGTTGGATGTCAAGAC----- mirL 21 38
-----TATCTAGTTGGATGTCAAGACAC----- mirL 23 20
-----TATCTAGTTGGATGTCAAGA----- mirL 20 15
-----ATCTAGTTGGATGTCAAGACA----- mirL 21 15
-----TATCTAGTTGGATGTCAAG----- mirL 19 8

```

```

-----TATCTAGTTGGATGTCAAGACACG----- mirL 24 7
-----TTTATCTAGTTGGATGTCAAGACA----- mirL 24 5
-----CTTTATCTAGTTGGATGT----- mirL 18 4
-----TCTAGTTGGATGTCAAGA----- mirL 18 2
-----ATCTAGTTGGATGTCAAGACAC----- mirL 22 2
-----TTATCTAGTTGGATGTCA----- mirL 18 2
-----TATCTAGTTGGATGTCAAGACACGT----- mirL 25 1
-----ATCTAGTTGGATGTCAAG----- mirL 18 1
-----ACACGTGAAACTTAAGTG----- loop 18 2
-----GCATGACACCACACTGGGTAGA----- mirR 22 2201
-----GCATGACACCACACTGGGTAG----- mirR 21 1228
-----GCATGACACCACACTGGGTA----- mirR 20 284
-----CATGACACCACACTGGGTAGA----- mirR 21 53
-----GCATGACACCACACTGGGTAGAG----- mirR 23 50
-----TGACACCACACTGGGTAGA----- mirR 19 26
-----GCATGACACCACACTGGG----- mirR 18 18
-----ATGACACCACACTGGGTAG----- mirR 19 13
-----GCATGACACCACACTGGGT----- mirR 19 12
-----TGACACCACACTGGGTAG----- mirR 18 10
-----GTGCATGACACCACACTGG----- mirR 19 10
-----CATGACACCACACTGGGTAG----- mirR 20 6
-----CATGACACCACACTGGGTAGAGG----- mirR 23 2
-----CATGACACCACACTGGGT----- mirR 18 1
-----GCATGACACCACACTGGGTAGAGGA----- mirR 25 1
-----TGCATGACACCACACTGG----- mirR 18 1
-----TGACACCACACTGGGTAGAGG----- mirR 21 1
-----TGCATGACACCACACTGGGTAGA----- mirR 23 1
-----ATGACACCACACTGGGTAGA----- mirR 20 1
-----GGAGGGCTCACAGTGTTCC--- morR 18 2
-----GGAGGGCTCACAGTGTTCC-- morR 19 1
-----GAGGAGGGCTCACAGTGT---- morR 18 1
-----AGAGGAGGGCTCACAGTG---- morR 18 1
-----GGGCTCACAGTGTTCCCTC morR 18 1

>mmu-mir-1195
AGGTAGAGGCAGGCAGATCTCTGTGAGTTGCGAGGCCAGCCTGCTCAACAGAATGAGTTCTAGGGCAGCCAGGAACACACAGAGAAACCCTGTCTCAAGAAGGTAAAAAGTAAAAAAAAAAAAAAAAAGAA species 1
-----GAGGCAGGCAGATCTCTG----- morL 18 7
-----AGGCAGGCAGATCTCTGTGA----- morL 20 6
-----GCAGGCAGATCTCTGTGA----- morL 18 4
-----AGGCAGGCAGATCTCTGTG----- morL 19 3
-----GAGGCAGGCAGATCTCTGT----- morL 19 3
-----AGGCAGGCAGATCTCTGT----- morL 18 2
AGGTAGAGGCAGGCAGATCTCT----- morL 22 1
-----AGAGGCAGGCAGATCTCTGT----- morL 20 1
-----GAGGCAGGCAGATCTCTGTG----- morL 20 1
-----TGAGTTGCGAGGCCAGCCTGCTCA----- mirL 23 12

```

|                                      |      |    |    |
|--------------------------------------|------|----|----|
| -----TGAGTTCGAGGCCAGCCTGCTC-----     | mirL | 22 | 65 |
| -----TGAGTTCGAGGCCAGCCTGCT-----      | mirL | 21 | 32 |
| -----GAGTTCGAGGCCAGCCTGCTCA-----     | mirL | 22 | 19 |
| -----GAGTTCGAGGCCAGCCTGCTC-----      | mirL | 21 | 16 |
| -----AGTTCGAGGCCAGCCTGCTCA-----      | mirL | 21 | 12 |
| -----TGAGTTCGAGGCCAGCCTGCTCAA-----   | mirL | 24 | 87 |
| -----GAGTTCGAGGCCAGCCTGCT-----       | mirL | 20 | 73 |
| -----CTGTGAGTTCGAGGCCAGCCTG-----     | mirL | 22 | 69 |
| -----TGAGTTCGAGGCCAGCCTGC-----       | mirL | 20 | 66 |
| -----GAGTTCGAGGCCAGCCTGCTCAA-----    | mirL | 23 | 51 |
| -----GAGTTCGAGGCCAGCCTGC-----        | mirL | 19 | 48 |
| -----TGAGTTCGAGGCCAGCCTGCTCAAC-----  | mirL | 25 | 43 |
| -----GTTTCGAGGCCAGCCTGCTCA-----      | mirL | 20 | 39 |
| -----AGTTCGAGGCCAGCCTGCTC-----       | mirL | 20 | 33 |
| -----AGTTCGAGGCCAGCCTGCTCAA-----     | mirL | 22 | 32 |
| -----GTGAGTTCGAGGCCAGCCTG-----       | mirL | 20 | 32 |
| -----GTGAGTTCGAGGCCAGCCT-----        | mirL | 19 | 26 |
| -----TGTGAGTTCGAGGCCAGCCTGC-----     | mirL | 22 | 26 |
| -----GTGAGTTCGAGGCCAGCC-----         | mirL | 18 | 24 |
| -----TGAGTTCGAGGCCAGCCTGCTCAACA----- | mirL | 26 | 23 |
| -----AGTTCGAGGCCAGCCTGCT-----        | mirL | 19 | 21 |
| -----GTGAGTTCGAGGCCAGCCTGC-----      | mirL | 21 | 19 |
| -----GAGTTCGAGGCCAGCCTGCTCAACA-----  | mirL | 25 | 16 |
| -----TGTGAGTTCGAGGCCAGCC-----        | mirL | 19 | 16 |
| -----TGTGAGTTCGAGGCCAGCCTG-----      | mirL | 21 | 15 |
| -----AGTTCGAGGCCAGCCTGC-----         | mirL | 18 | 14 |
| -----GAGTTCGAGGCCAGCCTGCTCAAC-----   | mirL | 24 | 13 |
| -----CTGTGAGTTCGAGGCCAGCCTGC-----    | mirL | 23 | 13 |
| -----CTGTGAGTTCGAGGCCAG-----         | mirL | 18 | 13 |
| -----TGTGAGTTCGAGGCCAGCCT-----       | mirL | 20 | 13 |
| -----CTGTGAGTTCGAGGCCAGCC-----       | mirL | 20 | 12 |
| -----CTGTGAGTTCGAGGCCAGCCT-----      | mirL | 21 | 10 |
| -----AGTTCGAGGCCAGCCTGCTCAAC-----    | mirL | 23 | 8  |
| -----CTGTGAGTTCGAGGCCAGC-----        | mirL | 19 | 6  |
| -----GTGAGTTCGAGGCCAGCCTGCTCA-----   | mirL | 24 | 5  |
| -----TGTGAGTTCGAGGCCAGC-----         | mirL | 18 | 4  |
| -----GTTTCGAGGCCAGCCTGCTCAA-----     | mirL | 21 | 4  |
| -----TGTGAGTTCGAGGCCAGCCTGCT-----    | mirL | 23 | 4  |
| -----GTGAGTTCGAGGCCAGCCTGCT-----     | mirL | 22 | 3  |
| -----GTTTCGAGGCCAGCCTGCTC-----       | mirL | 19 | 3  |
| -----AGTTCGAGGCCAGCCTGCTCAACA-----   | mirL | 24 | 1  |
| -----GTGAGTTCGAGGCCAGCCTGCTC-----    | mirL | 23 | 1  |
| -----GTTTCGAGGCCAGCCTGCT-----        | mirL | 18 | 1  |
| -----CACAGAGAAACCCTGTCTCAAG-----     | mirR | 22 | 19 |
| -----CACAGAGAAACCCTGTCTCAA-----      | mirR | 21 | 96 |
| -----CACAGAGAAACCCTGTCTCA-----       | mirR | 20 | 75 |

```

-----CACAGAGAAACCCTGTCTCAAGAA----- mirR 24 49
-----ACACAGAGAAACCCTGTCTCAA----- mirR 22 42
-----ACACAGAGAAACCCTGTCTCAAGA----- mirR 24 27
-----CACAGAGAAACCCTGTCTCAAGA----- mirR 23 26
-----ACACAGAGAAACCCTGTCTCAAG----- mirR 23 21
-----ACACAGAGAAACCCTGTCTCA----- mirR 21 20
-----ACACAGAGAAACCCTGTCTCAAGAAG----- mirR 26 15
-----ACACAGAGAAACCCTGTCTCAAGAA----- mirR 25 8
-----CACAGAGAAACCCTGTCTCAAGAAG----- mirR 25 6
-----ACACACAGAGAAACCCTG----- mirR 18 5
-----ACAGAGAAACCCTGTCTCAAG----- mirR 21 4
-----CACAGAGAAACCCTGTCTCAAGAAG----- mirR 26 3
-----AGAGAAACCCTGTCTCAAG----- mirR 19 2
-----ACACAGAGAAACCCTGTCTCAAGAAG----- mirR 27 2
-----ACACACAGAGAAACCCTGTC----- mirR 20 1
-----AGAGAAACCCTGTCTCAAGA----- mirR 20 1
-----ACACACAGAGAAACCCTGTCTC----- mirR 22 1
-----ACACACAGAGAAACCCTGTCT----- mirR 21 1
-----GGTAAAAAGTAAAAAAAA----- morR 18 90
-----GGTAAAAAGTAAAAAAAA----- morR 19 56
-----AGGTAAAAAGTAAAAAAAA----- morR 19 18
-----GTAAAAAGTAAAAAAAA----- morR 18 15
-----AGGTAAAAAGTAAAAAAAA----- morR 18 8
-----GGTAAAAAGTAAAAAAAA----- morR 20 8
-----AGGTAAAAAGTAAAAAAAA----- morR 20 5
-----AAGGTAAAAAGTAAAAAAAA----- morR 21 5
-----GGTAAAAAGTAAAAAAAA----- morR 21 3
-----GGTAAAAAGTAAAAAAAA----- morR 22 2
-----AAGGTAAAAAGTAAAAAAAA----- morR 22 2
-----AAGGTAAAAAGTAAAAA----- morR 18 2
-----AGGTAAAAAGTAAAAAAAA----- morR 21 2
-----GTAAAAAGTAAAAAAAAAAAAAAAAAGAA morR 29 1
-----GTAAAAAGTAAAAAAAA----- morR 19 1
-----GAAGGTAAAAAGTAAAAA----- morR 18 1
-----AAGGTAAAAAGTAAAAAAAA----- morR 20 1
-----GGTAAAAAGTAAAAAAAAAAAAAAAAAGAA- morR 29 1
-----AAGAAGGTAAAAAGTAAA----- morR 18 1
-----AGAAGGTAAAAAGTAAAAAAAA----- morR 22 1
-----GGTAAAAAGTAAAAAAAAAAAAAAAA----- morR 26 1
-----AGAAGGTAAAAAGTAAAAA----- morR 20 1

```

>mmu-mir-383

```

AGAAACTCCACGTCACCTGCTCCTCAGATCAGAAGGTGACTGTGGCTTTGGGTGGATATTAATCAGCCACAGCACTGCCTGGTCAGAAAGAGCAAGTGTCTAGCCTT species len reads
AGAAACTCCACGTCACCTGCTC----- morL 22 1
-----AGATCAGAAGGTGACTGTGGCT----- mirL 22 3691
-----AGATCAGAAGGTGACTGTGG----- mirL 20 262

```

```

-----AGATCAGAAGGTGACTGTGGC----- mirL 21 115
-----GATCAGAAGGTGACTGTGGCT----- mirL 21 62
-----CAGATCAGAAGGTGACTGTGG----- mirL 21 55
-----AGATCAGAAGGTGACTGTGGCTT----- mirL 23 33
-----CAGATCAGAAGGTGACTGTGGCT----- mirL 23 27
-----AGATCAGAAGGTGACTGTG----- mirL 19 21
-----ATCAGAAGGTGACTGTGGCT----- mirL 20 13
-----CAGATCAGAAGGTGACTGTGGCTTT----- mirL 25 12
-----AGATCAGAAGGTGACTGTGGCTTT----- mirL 24 12
-----AGATCAGAAGGTGACTGT----- mirL 18 10
-----CAGATCAGAAGGTGACTGTGGCTT----- mirL 24 7
-----GATCAGAAGGTGACTGTGG----- mirL 19 4
-----GATCAGAAGGTGACTGTGGC----- mirL 20 3
-----CAGATCAGAAGGTGACTGTGGC----- mirL 22 3
-----ATCAGAAGGTGACTGTGG----- mirL 18 2
-----CAGATCAGAAGGTGACTGTG----- mirL 20 2
-----CTCAGATCAGAAGGTGAC----- mirL 18 2
-----CTCAGATCAGAAGGTGACTGTG----- mirL 22 2
-----CAGATCAGAAGGTGACTGT----- mirL 19 2
-----CTCAGATCAGAAGGTGACTG----- mirL 20 1
-----TCAGATCAGAAGGTGACT----- mirL 18 1
-----GATCAGAAGGTGACTGTG----- mirL 18 1
-----TCAGATCAGAAGGTGACTG----- mirL 19 1
-----TCAGAAGGTGACTGTGGCT----- mirL 19 1
-----CCACAGCACTGCCTGGTCAGA----- mirR 21 17
-----ACAGCACTGCCTGGTCAGAAA----- mirR 21 8
-----CCACAGCACTGCCTGGTCAG----- mirR 20 2
-----AGCCACAGCACTGCCTGGT----- mirR 19 1
-----AGCCACAGCACTGCCTGG----- mirR 18 1
-----GCCACAGCACTGCCTGGTC----- mirR 19 1
-----CAGCCACAGCACTGCCTG----- mirR 18 1
-----GCCACAGCACTGCCTGGT----- mirR 18 1
-----AGAGCAAGTGCCTAGCCTT morR 20 4
-----AGAGCAAGTGCCTAGCC-- morR 18 2
-----AAGAGCAAGTGCCTAGCCT- morR 20 1
-----GAGCAAGTGCCTAGCCT- morR 18 1
-----AGAAAGAGCAAGTGCCT----- morR 18 1

```

>mmu-mir-377

```

TCTCGGCCTGTGCTGACGTTTGATTCTTGAGCAGAGGTTGCCCTTGGTGAATTCGCTTTATTGATGTTGAATCACACAAAGGCAACTTTTGTGTTGAGTATCAAAGCCTGCTTG species len reads
-----TGTGCTGACGTTTGATTCTTGAGC----- morL 24 483
-----CTGACGTTTGATTCTTGAGC----- morL 20 272
-----CTGTGCTGACGTTTGATTCTTGAGC----- morL 25 213
-----TGACGTTTGATTCTTGAGC----- morL 19 105
-----TGTGCTGACGTTTGATTCTTGAGCA----- morL 25 64
-----TGCTGACGTTTGATTCTTGAGC----- morL 22 36

```



```

-----TGTGCTGACGTTTGATTCTTGAG----- morL 23 36
-----CTGTGCTGACGTTTGATTCTTGAGCA----- morL 26 29
-----TGTGCTGACGTTTGATTCTTGAGCAG----- morL 26 26
-----CTGTGCTGACGTTTGATTCTTGAGCAG----- morL 27 25
-----CTGTGCTGACGTTTGATTCTTGAG----- morL 24 25
-----GTGCTGACGTTTGATTCTTGAGC----- morL 23 23
TCTCGGCCTGTGCTGACGTTTGATTCTTGAGC----- morL 32 19
-----ACGTTTGATTCTTGAGCAG----- morL 19 14
-----CTGACGTTTGATTCTTGAG----- morL 19 6
-----CTGACGTTTGATTCTTGAGCA----- morL 21 5
-----CTGACGTTTGATTCTTGAGCAG----- morL 22 5
-----TGACGTTTGATTCTTGAG----- morL 18 4
-----TGTGCTGACGTTTGATTCTTGA----- morL 22 4
-----TGCTGACGTTTGATTCTTG----- morL 19 4
-----GACGTTTGATTCTTGAGCAG----- morL 20 4
-----CTGACGTTTGATTCTTGA----- morL 18 3
-----TGTGCTGACGTTTGATTCTTGAGCAGA----- morL 27 3
-----TGACGTTTGATTCTTGAGCA----- morL 20 2
-----TGACGTTTGATTCTTGAGCAG----- morL 21 2
-----CTGTGCTGACGTTTGATTCTTGAGCAGA----- morL 28 1
-----GTGCTGACGTTTGATTCTTGAGCAG----- morL 25 1
-----TGCTGACGTTTGATTCTTGAG----- morL 21 1
-----CTGACGTTTGATTCTTGAGCAGA----- morL 23 1
-----TGCTGACGTTTGATTCTTGAGCA----- morL 23 1
-----CGTTTGATTCTTGAGCAGA----- morL 19 1
-----GCTGACGTTTGATTCTTGA----- morL 19 1
-CTCGGCCTGTGCTGACGTTTGATTCTTGA----- morL 29 1
-----AGAGTTGCCCTTGGTGAATTC----- mirL 22 287
-----GAGTTGCCCTTGGTGAATTCG----- mirL 22 97
-----AGAGTTGCCCTTGGTGAATT----- mirL 21 39
-----AGGTTGCCCTTGGTGAATTCGC----- mirL 22 29
-----GAGTTGCCCTTGGTGAATTC----- mirL 21 22
-----AGAGTTGCCCTTGGTGAATTCG----- mirL 23 20
-----GGTTGCCCTTGGTGAATTC----- mirL 19 13
-----AGAGTTGCCCTTGGTGAAT----- mirL 20 11
-----GAGTTGCCCTTGGTGAATTCGC----- mirL 23 10
-----AGGTTGCCCTTGGTGAATT----- mirL 19 10
-----GAGTTGCCCTTGGTGAATT----- mirL 20 8
-----AGGTTGCCCTTGGTGAATTCGCT----- mirL 23 7
-----AGGTTGCCCTTGGTGAAT----- mirL 18 4
-----AGAGTTGCCCTTGGTGAATTCGC----- mirL 24 3
-----GGTTGCCCTTGGTGAATTCG----- mirL 20 3
-----GAGTTGCCCTTGGTGAAT----- mirL 19 3
-----AGGTTGCCCTTGGTGAATTCGCTT----- mirL 24 2
-----AGCAGAGGTTGCCCTTGG----- mirL 18 1
-----GAGGTTGCCCTTGGTGAATTCGCT----- mirL 24 1

```

```
-----AGGTTGCCCTTGGTGAATTCGCTTTAT----- mirL 27 1
-----AGGTTGCCCTTGGTGAATTCG----- mirL 21 1
-----GAGGTTGCCCTTGGTGAA----- mirL 18 1
-----AGAGGTTGCCCTTGGTGAA----- mirL 19 1
-----TGAATCACACAAAGGCAACTTTT----- mirR 23 674
-----ATCACACAAAGGCAACTTTTGT----- mirR 22 556
-----TGAATCACACAAAGGCAACTTTTG----- mirR 24 209
-----ATCACACAAAGGCAACTTTTG----- mirR 21 207
-----TGAATCACACAAAGGCAACTTT----- mirR 22 107
-----AATCACACAAAGGCAACTTTTGT----- mirR 23 72
-----TGAATCACACAAAGGCAACT----- mirR 20 54
-----ATCACACAAAGGCAACTTTTGT----- mirR 23 50
-----GAATCACACAAAGGCAACTTTT----- mirR 22 41
-----TGAATCACACAAAGGCAACT----- mirR 21 38
-----ATCACACAAAGGCAACTTTT----- mirR 20 33
-----GAATCACACAAAGGCAACTTTTG----- mirR 23 32
-----ATCACACAAAGGCAACTTTTGT----- mirR 24 31
-----AATCACACAAAGGCAACTTTTG----- mirR 22 29
-----TGAATCACACAAAGGCAAC----- mirR 19 19
-----ATCACACAAAGGCAACT----- mirR 18 19
-----TGAATCACACAAAGGCAA----- mirR 18 17
-----AATCACACAAAGGCAACTTT----- mirR 21 10
-----ATCACACAAAGGCAACTTT----- mirR 19 9
-----GAATCACACAAAGGCAACTTT----- mirR 21 6
-----GAATCACACAAAGGCAACT----- mirR 19 6
-----GAATCACACAAAGGCAACT----- mirR 20 4
-----AATCACACAAAGGCAACT----- mirR 18 3
-----GAATCACACAAAGGCAAC----- mirR 18 3
-----AATCACACAAAGGCAACTTTTGT----- mirR 24 2
-----GAATCACACAAAGGCAACTTTGT----- mirR 24 1
-----AATCACACAAAGGCAACTTTTGT----- mirR 25 1
-----TGAGTATCAAAGCCTGCT----- morR 18 19
-----TGTTTGAGTATCAAAGCC----- morR 18 3
-----TTGTTTGAGTATCAAAGC----- morR 18 3
-----TTGAGTATCAAAGCCTGCT----- morR 19 2
-----GTTTGAGTATCAAAGCCT----- morR 18 2
-----TTTGTGTTGAGTATCAAAG----- morR 18 1
-----TTGAGTATCAAAGCCTGCTTG morR 21 1
-----TGTTTGAGTATCAAAGCCTGC--- morR 21 1
-----TGAGTATCAAAGCCTGCTTG morR 20 1
-----GTTTGAGTATCAAAGCCTG---- morR 19 1

>mmu-mir-1946b
CTGCCTCCGGAGTGCTGGGATTAAGGCGTGCCACCACCTGCCAGCTTTCAGAGTGAATTTGAGGCTATCTGGCTATATGAGACTGCTTCACAGGGTAAGAAAAGGGGAAAGTGCCGGGCAGTGGTGGCACATGCTTTT
-----GGAGTGCTGGGATTAAGGC-----
-----GGAGTGCTGGGATTAAGGCGT-----
```

CTGCCTCCGGAGTGCTGGGATTAAGGCGT-----  
-----CGCCACCACTGCCAGCTTT-----  
-----CGCCACCACTGCCAGCTT-----  
-----CGCCACCACTGCCAGCT-----  
-----CGCCACCACTGCCAGCTTTC-----  
-----TGCGCCACCACTGCCAGCTTT-----  
-----TGCGCCACCACTGCCAG-----  
-----TGCGCCACCACTGCCAGCTT-----  
-----GCGCCACCACTGCCAGC-----  
-----TGCGCCACCACTGCCAGCT-----  
-----GCCACCACTGCCAGCTTT-----  
-----GTGCGCCACCACTGCCA-----  
-----GCGCCACCACTGCCAGCTT-----  
-----TGCGCCACCACTGCCAGC-----  
-----GCGCCACCACTGCCAGCTTT-----  
-----GTGCGCCACCACTGCCAG-----  
-----TGCGCCACCACTGCCAGCTTTC-----  
-----GCCACCACTGCCAGCTT-----  
-----CACCACTGCCAGCTTTC-----  
-----CCACCACTGCCAGCTTTCA-----  
-----GTGCGCCACCACTGCCAGCTT-----  
-----GCGCCACCACTGCCAGCT-----  
-----CCACCACTGCCAGCTTT-----  
-----CGCCACCACTGCCAGCTTTCA-----  
-----GCCGGGCAGTGGTGGCACATGCTTTT-----  
-----GCCGGGCAGTGGTGGCACATGCTTT-----  
-----GCCGGGCAGTGGTGGCACATGCTTTT-----  
-----GCCGGGCAGTGGTGGCACATGCTTT-----  
-----GCCGGGCAGTGGTGGCACATGCT---  
-----GCCGGGCAGTGGTGGCACATG-----  
-----GCCGGGCAGTGGTGGCACAT-----  
-----GGGCAGTGGTGGCACATGCTTTT-----  
-----AGTGCCGGGCAGTGGTGGCACA-----  
-----GGGCAGTGGTGGCACATGCTTT-----  
-----CCGGGCAGTGGTGGCACATGCTTTT-----  
-----CGGGCAGTGGTGGCACATGCTTTT-----  
-----GGGCAGTGGTGGCACATGCTTTT-----  
-----GTGCCGGGCAGTGGTGGCACATGCTTTT-----  
-----GTGCCGGGCAGTGGTGGCACATGCT---  
-----CCGGGCAGTGGTGGCACATGCTTT-----  
-----GTGCCGGGCAGTGGTGGCACATGCTT-----  
-----GGGCAGTGGTGGCACATGCT-----  
-----GGGCAGTGGTGGCACATGCTT-----  
-----GTGCCGGGCAGTGGTGGCACA-----  
-----GTGCCGGGCAGTGGTGGCACATGC-----  
-----CGGGCAGTGGTGGCACATG-----



-----TTT  
-----TTT  
-----TT  
-----TTT

>mmu-mir-698

| TCATCTCTGCCCTCACTGTAAGGGAGGGTGGTGGCTATGTGGGTGGGACAGGGATGTTTCAGTTGCTAAAGACATTCTCGTTTCCTTCCCTCAGTGTCCTCCAGATGGTGAAC | species | len | reads |
|-------------------------------------------------------------------------------------------------------------------|---------|-----|-------|
| ---CTCTGCCCTCACTGTAAGG---                                                                                         | morL    | 19  | 2     |
| --ATCTCTGCCCTCACTGTA---                                                                                           | morL    | 18  | 2     |
| ---TCTCTGCCCTCACTGTAA---                                                                                          | morL    | 18  | 1     |
| TCATCTCTGCCCTCACTGTAAG-----                                                                                       | morL    | 22  | 1     |
| -----GAGGGTGGTGGCTATGTG-----                                                                                      | mirL    | 18  | 13    |
| -----GGTGGTGGCTATGTGGGT-----                                                                                      | mirL    | 18  | 4     |
| -----AGGGTGGTGGCTATGTGG-----                                                                                      | mirL    | 18  | 3     |
| -----GGGTGGTGGCTATGTGGG-----                                                                                      | mirL    | 18  | 1     |
| -----GGTGGTGGCTATGTGGGTG-----                                                                                     | mirL    | 19  | 1     |
| -----GGAGGGTGGTGGCTATGT-----                                                                                      | mirL    | 18  | 1     |
| -----AGGGAGGGTGGTGGCTAT-----                                                                                      | mirL    | 18  | 1     |
| -----CATTCTCGTTTCCTTCCCT-----                                                                                     | mirR    | 19  | 3633  |
| -----CATTCTCGTTTCCTTCCC-----                                                                                      | mirR    | 18  | 395   |
| -----ATTCTCGTTTCCTTCCCT-----                                                                                      | mirR    | 18  | 40    |
| -----CATTCTCGTTTCCTTCCCTC-----                                                                                    | mirR    | 20  | 7     |
| -----ACATTCTCGTTTCCTTCCC-----                                                                                     | mirR    | 19  | 4     |
| -----CATTCTCGTTTCCTTCCCTCAGT-----                                                                                 | mirR    | 23  | 2     |
| -----TCTCGTTTCCTTCCCTCA-----                                                                                      | mirR    | 18  | 2     |
| -----CATTCTCGTTTCCTTCCCTCAGTGTC-----                                                                              | mirR    | 26  | 2     |
| -----TCTCGTTTCCTTCCCTCAGTGT-----                                                                                  | mirR    | 22  | 1     |
| -----CATTCTCGTTTCCTTCCCTCAGTGTC-----                                                                              | mirR    | 28  | 1     |
| -----ACATTCTCGTTTCCTTCC-----                                                                                      | mirR    | 18  | 1     |
| -----ATTCTCGTTTCCTTCCCTC-----                                                                                     | mirR    | 19  | 1     |
| -----TTCTCGTTTCCTTCCCTC-----                                                                                      | mirR    | 18  | 1     |
| -----AGACATTCTCGTTTCCTT-----                                                                                      | mirR    | 18  | 1     |
| -----CAGTGTCCTCCAGATGGTGAAC-----                                                                                  | morR    | 21  | 2     |
| -----GTGTCCCAGATGGTGAA-----                                                                                       | morR    | 18  | 1     |
| -----CTCAGTGTCCTCCAGATGGT-----                                                                                    | morR    | 19  | 1     |

```
-----CAGTGTCCCCAGATGGTG--- morR 18 1

>mmu-mir-451
GCACTTGGGAATGGCGAGGAAACCGTTACCATTACTGAGTTTAGTAATGGTAACGGTTCTCTTGCTGCTCCCACAACTGTGCCAAGAAGAGCTCATGAC species len reads
GCACTTGGGAATGGCGAGG----- morL 19 8
----TTGGGAATGGCGAGGAAA----- morL 18 1
-----AAACCGTTACCATTACTGA----- mirL 19 1209
-----AAACCGTTACCATTACTGAG----- mirL 20 1182
-----AAACCGTTACCATTACTGAGT----- mirL 21 891
-----AAACCGTTACCATTACTG----- mirL 18 358
-----AACCGTTACCATTACTGAGT----- mirL 20 123
-----AACCGTTACCATTACTGA----- mirL 18 53
-----AACCGTTACCATTACTGAG----- mirL 19 48
-----ACCGTTACCATTACTGAG----- mirL 18 35
-----ACCGTTACCATTACTGAGT----- mirL 19 35
-----CCGTTACCATTACTGAGT----- mirL 18 23
-----GGAAACCGTTACCATTACT----- mirL 19 1
-----AGGAAACCGTTACCATTACTGAGT----- mirL 24 1
-----AGTTTAGTAATGGTAACG----- loop 18 1
-----TTTAGTAATGGTAACGGTTCTC----- loop 22 1
-----CTCTTGCTGCTCCCACAAAC----- mirR 20 83
-----TCTTGCTGCTCCCACAAAC----- mirR 19 15
-----CTCTTGCTGCTCCCACAAA----- mirR 19 9
-----CTCTTGCTGCTCCCACAA----- mirR 18 8
-----TCTCTTGCTGCTCCCACA----- mirR 18 6
-----CTTGCTGCTCCCACAAAC----- mirR 18 5
-----TCTTGCTGCTCCCACAAACTG----- mirR 21 4
-----CTCTTGCTGCTCCCACAAACT----- mirR 21 2
-----TCTCTTGCTGCTCCCACAAACT----- mirR 22 1
-----TCTTGCTGCTCCCACAAA----- mirR 18 1
-----TTGCTGCTCCCACAAACT----- mirR 18 1
-----TCTTGCTGCTCCCACAAACT----- mirR 20 1
-----CTGTGCCAAGAAGAGCTC----- morR 18 2
-----GCCAAGAAGAGCTCATGAC morR 19 1
-----GCCAAGAAGAGCTCATGA- morR 18 1

>mmu-mir-2145-2
CGATCTCCTCTGATCTCGGAAGCTAAGCAGGGTCGGGCTGGTTAGCACTTGGATGGGAGAAACGTTGAGGCGGGCTAGAGTGCAATTCCCAACACTGGCCCATTGCTTAGTGTCTGAGTTCCAAGCTCCTCACTTGTG
----TCCTCTGATCTCGGAAGCTA-----
----CTCCTCTGATCTCGGAAGCTA-----
----CTCCTCTGATCTCGGAAGCT-----
----TCCTCTGATCTCGGAAGCTAA-----
--ATCTCCTCTGATCTCGGAAGCT-----
--TCTCCTCTGATCTCGGAAGCT-----
----TCCTCTGATCTCGGAAGC-----
----TCCTCTGATCTCGGAAGCT-----
```

-----CTCCTCTGATCTCGGAAGCTAA-----  
--ATCTCCTCTGATCTCGGAAGCTA-----  
---TCTCCTCTGATCTCGGAAGC-----  
-----TCCTCTGATCTCGGAAGCTAAG-----  
-----TCCTCTGATCTCGGAAGCTAAGC-----  
-----CCTCTGATCTCGGAAGCTAAGC-----  
-----CTGATCTCGGAAGCTAAG-----  
-----CCTCTGATCTCGGAAGCTAA-----  
-----CTCTGATCTCGGAAGCTAA-----  
-----CCTCTGATCTCGGAAGCT-----  
-----CCTCTGATCTCGGAAGCTA-----  
-----CTCTGATCTCGGAAGCTAAG-----  
-----CCTCTGATCTCGGAAGCTAAG-----  
-----CTCCTCTGATCTCGGAAG-----  
---TCTCCTCTGATCTCGGAAGCTA-----  
-----CTCCTCTGATCTCGGAAGC-----  
-----CTCTGATCTCGGAAGCTA-----  
---TCTCCTCTGATCTCGGAAG-----  
-----TCTGATCTCGGAAGCTAAGC-----  
-----TCTGATCTCGGAAGCTAAG-----  
CGATCTCCTCTGATCTCGGAAGCT-----  
-----CTCTGATCTCGGAAGCTAAGC-----  
CGATCTCCTCTGATCTCGGAAG-----  
-----TGATCTCGGAAGCTAAGC-----  
-GATCTCCTCTGATCTCGGAAGCTAA-----  
--ATCTCCTCTGATCTCGGAAGCTAA-----  
-GATCTCCTCTGATCTCGGAAGC-----  
--ATCTCCTCTGATCTCGGAAG-----  
---CTCCTCTGATCTCGGAAGCTAAG-----  
CGATCTCCTCTGATCTCGGAAGCTAA-----  
-----AGCAGGGTCGGGCCTGGTT-----  
-----AAGCAGGGTCGGGCCTGG-----  
-----AGCAGGGTCGGGCCTGGT-----  
-----CTAAGCAGGGTCGGGCCTGGTT-----  
-----TAAGCAGGGTCGGGCCTGGTT-----  
-----AAGCAGGGTCGGGCCTGGTT-----  
-----AAGCAGGGTCGGGCCTGGTTA-----  
-----CTAAGCAGGGTCGGGCCTGGT-----  
-----TAAGCAGGGTCGGGCCTGG-----  
-----CTAAGCAGGGTCGGGCCTGG-----  
-----AAGCAGGGTCGGGCCTGGT-----  
-----GCAGGGTCGGGCCTGGTT-----  
-----CTAAGCAGGGTCGGGCCTGGTTA-----  
-----AGCAGGGTCGGGCCTGGTTA-----  
-----AGCAGGGTCGGGCCTGGTTAGCA-----  
-----TAAGCAGGGTCGGGCCTGGTTA-----

```
-----AAGCAGGGTCGGGCCTGGTTAGC-----
-----CTAAGCAGGGTCGGGCCTG-----
-----AGCAGGGTCGGGCCTGGTTAGC-----
-----CAGGGTCGGGCCTGGTTAGC-----
-----GCAGGGTCGGGCCTGGTTAGCA-----
-----TAAGCAGGGTCGGGCCTG-----
-----CAGGGTCGGGCCTGGTTAGCA-----
-----AGGGTCGGGCCTGGTTAGCA-----
-----AAGCAGGGTCGGGCCTGGTTAG-----
-----GCAGGGTCGGGCCTGGTTAGCAC-----
-----GCAGGGTCGGGCCTGGTTAGC-----
-----CTAAGCAGGGTCGGGCCT-----
-----AGGGTCGGGCCTGGTTAGCAC-----
-----CAGGGTCGGGCCTGGTTA-----
-----GCAGGGTCGGGCCTGGTTA-----
-----AGCAGGGTCGGGCCTGGTTAG-----
-----CAGGGTCGGGCCTGGTTAG-----
-----TAAGCAGGGTCGGGCCTGGT-----
-----AAGCAGGGTCGGGCCTGGTTAGCACTTG-----
-----AGGGTCGGGCCTGGTTAGCACT-----
-----AGGGTCGGGCCTGGTTAGCACTTGGATGGGA-----
-----GCAGGGTCGGGCCTGGTTAG-----
-----TAAGCAGGGTCGGGCCTGGTTAGC-----
-----GCAGGGTCGGGCCTGGTTAGCACTTGA-----
-----TAAGCAGGGTCGGGCCTGGTTAGCA-----
-----AGCAGGGTCGGGCCTGGTTAGCACTTGGAT-----
-----CAGGGTCGGGCCTGGTTAGCAC-----
-----CAGGGTCGGGCCTGGTTAGCACTTG-----
-----CTAAGCAGGGTCGGGCCTGGTTAG-----
-----AGGGTCGGGCCTGGTTAG-----
-----TGAGTTCCAAGCTCCTCACT-----
-----TGAGTTCCAAGCTCCTCAC-----
-----TGAGTTCCAAGCTCCTCA-----
-----AGTTCCAAGCTCCTCACT-----
-----AGTTCCAAGCTCCTCACTTGTG-----
-----TCTGAGTTCCAAGCTCCTCACT-----
-----TCTGAGTTCCAAGCTCCTCAC-----
-----GAGTTCCAAGCTCCTCACTT-----
-----CTGAGTTCCAAGCTCCTC-----
-----GAGTTCCAAGCTCCTCAC-----
-----G-----
-----TTGTG-----
-----TTGTG-----
-----TTGTG-----
-----GTG-----
-----TG-----
```



```

>mmu-mir-770
GAAGCCACCTTCTGTGCCCCCAGCACCACGTGTCTGGGCCACGTGAGCAACGCCACGTGGGCCTGACGTGGAGCTGGGGCCGAGGGGTCTGATGGCCTCCTGTTTCAGA species len reads
--AAGCCACCTTCTGTGCCCC------- morL 20 22
--AAGCCACCTTCTGTGCCCCA----- morL 21 9
---CCACCTTCTGTGCCCCA----- morL 18 8
--AGCCACCTTCTGTGCCCCA----- morL 20 5
--AGCCACCTTCTGTGCCCC------- morL 19 5
---GCCACCTTCTGTGCCCCAGC----- morL 21 4
--AGCCACCTTCTGTGCCCC----- morL 18 3
--AAGCCACCTTCTGTGCCCC----- morL 19 2
---GCCACCTTCTGTGCCCC----- morL 18 2
--AAGCCACCTTCTGTGCCCC----- morL 18 2
GAAGCCACCTTCTGTGCCCCA----- morL 22 1
GAAGCCACCTTCTGTGCC----- morL 18 1
-----AGCACCACGTGTCTGGGCCACG----- mirL 22 422
-----AGCACCACGTGTCTGGGCCACGT----- mirL 23 180
-----AGCACCACGTGTCTGGGCCACGTG----- mirL 24 97
-----AGCACCACGTGTCTGGGCCACGTGA----- mirL 25 95
-----AGCACCACGTGTCTGGGCCAC----- mirL 21 48
-----AGCACCACGTGTCTGGGCCA----- mirL 20 44
-----AGCACCACGTGTCTGGGCCACGTGAGC----- mirL 27 42
-----ACCACGTGTCTGGGCCACG----- mirL 19 6
-----GCACCACGTGTCTGGGCCACG----- mirL 21 6
-----CACCACGTGTCTGGGCCACG----- mirL 20 3
-----CAGCACCACGTGTCTGGGC----- mirL 19 2
-----GCACCACGTGTCTGGGCCACGT----- mirL 22 2
-----CAGCACCACGTGTCTGGGCC----- mirL 20 1
-----CAGCACCACGTGTCTGGGCCA----- mirL 21 1
-----ACGTGAGCAACGCCACGT----- loop 18 1
-----CGTGGGCCTGACGTGGAGCTGG----- mirR 22 975
-----CGTGGGCCTGACGTGGAGCTG----- mirR 21 406
-----CGTGGGCCTGACGTGGAGCTGGGG----- mirR 24 159
-----GTGGGCCTGACGTGGAGCTGG----- mirR 21 130
-----CGTGGGCCTGACGTGGAGCT----- mirR 20 128
-----TGGGCCTGACGTGGAGCTGGGG----- mirR 22 126
-----CGTGGGCCTGACGTGGAGCTGGG----- mirR 23 124
-----CGTGGGCCTGACGTGGAGCTGGGGC----- mirR 25 100
-----TGGGCCTGACGTGGAGCTGGG----- mirR 21 97
-----CGTGGGCCTGACGTGGAGC----- mirR 19 82
-----TGGGCCTGACGTGGAGCTGGGGC----- mirR 23 78
-----TGGGCCTGACGTGGAGCTGG----- mirR 20 76
-----GTGGGCCTGACGTGGAGCTGGGGC----- mirR 24 73
-----GTGGGCCTGACGTGGAGCTGGGG----- mirR 23 62
-----GTGGGCCTGACGTGGAGCTGGG----- mirR 22 60
-----GGGCCTGACGTGGAGCTGG----- mirR 19 49

```

```
-----TGGGCCTGACGTGGAGCTGGGGCCG----- mirR 26 40
-----TGGGCCTGACGTGGAGCTGGGGCC----- mirR 24 31
-----GTGGGCCTGACGTGGAGCTG----- mirR 20 24
-----GTGGGCCTGACGTGGAGCTGGGGCC----- mirR 25 24
-----TGGGCCTGACGTGGAGCT----- mirR 18 12
-----GGGCCTGACGTGGAGCTG----- mirR 18 8
-----GGGCCTGACGTGGAGCTGGGG----- mirR 21 6
-----GTGGGCCTGACGTGGAGCTGGGGCCG----- mirR 26 4
-----GGGCCTGACGTGGAGCTGGG----- mirR 20 3
-----GGGCCTGACGTGGAGCTGGGGCC----- mirR 23 2
-----GGGCCTGACGTGGAGCTGGGGC----- mirR 22 1
-----CACGTGGGCCTGACGTGGA----- mirR 19 1
-----GCCCAGGGGTCTGATGGC----- morR 19 5
-----TGGGGCCGAGGGGTCTG----- morR 18 3
-----GGCCGAGGGGTCTGATGGCCTCCTGTTTCAGA morR 33 1
-----GCCCAGGGGTCTGATGG----- morR 18 1
-----TGGGGCCGAGGGGTCTGAT----- morR 20 1

>mmu-mir-511
GTAACCAAATAGATACCCACCATGCCTTTTGCTCTGCACTCAGTAAATAATAATTGTGAATGTGTAGCAAAGACAGGATGGGGATCCATTAAATCCCAAGGATGACGACGTAAGGTGTGGTGGTTGGCAGAGG speci
-TAACCAAATAGATACCCA----- morL
GTAACCAAATAGATACCCA----- morL
GTAACCAAATAGATACCC----- morL
GTAACCAAATAGATACCCACC----- morL
-----ATGCCTTTTGCTCTGCACTCA----- mirL
-----CATGCCTTTTGCTCTGCACTCA----- mirL
-----ATGCCTTTTGCTCTGCACTC----- mirL
-----TGCCTTTTGCTCTGCACTCA----- mirL
-----CATGCCTTTTGCTCTGCACTC----- mirL
-----CATGCCTTTTGCTCTGCA----- mirL
-----TGCCTTTTGCTCTGCACTC----- mirL
-----CATGCCTTTTGCTCTGCACTCAG----- mirL
-----ATGCCTTTTGCTCTGCAC----- mirL
-----CATGCCTTTTGCTCTGCACT----- mirL
-----ATGCCTTTTGCTCTGCACTCAG----- mirL
-----ATGCCTTTTGCTCTGCACT----- mirL
-----GCCTTTTGCTCTGCACTC----- mirL
-----CATGCCTTTTGCTCTGCACTCAGT----- mirL
-----GCCTTTTGCTCTGCACTCA----- mirL
-----CCTTTTGCTCTGCACTCA----- mirL
-----TGCCTTTTGCTCTGCACTCAG----- mirL
-----ACCATGCCTTTTGCTCTG----- mirL
-----CATGCCTTTTGCTCTGCAC----- mirL
-----CCATGCCTTTTGCTCTGC----- mirL
-----ATCCCAAGGATGACGACGT----- mirR
-----TCCCAAGGATGACGACGT----- mirR
```

```

-----ATCCCAAGGATGACGACG----- mirR
-----AATCCCAAGGATGACGAC----- mirR
-----AATCCCAAGGATGACGACGT----- mirR
-----TAAATCCCAAGGATGACG----- mirR
-----CGTAAGGTGTGGTGGTTG----- morR
-----AGGTGTGGTGGTTGGCAG--- morR
-----GTGTGGTGGTTGGCAGAG morR
-----CGTAAGGTGTGGTGGTTGG----- morR
-----TAAGGTGTGGTGGTTGGCAGA-- morR
-----AGGTGTGGTGGTTGGCAGA-- morR

```

>mmu-mir-216b

| Sequence                                                                                      | species | len | reads |
|-----------------------------------------------------------------------------------------------|---------|-----|-------|
| TAATTGCACATTGGCAGACTGGGAAATCTCTGCAGGCAAATGTGATGTCACTGAAGAAACCACACACTTACCTGTAGAGATTCTTCAGTCTGA | morL    | 18  | 2     |
| -----GCACATTGGCAGACTGGG-----                                                                  | morL    | 19  | 1     |
| --ATTGCACATTGGCAGACTG-----                                                                    | morL    | 19  | 1     |
| TAATTGCACATTGGCAGAC-----                                                                      | mirL    | 25  | 2904  |
| -----GGGAAATCTCTGCAGGCAAATGTGA-----                                                           | mirL    | 23  | 275   |
| -----GGGAAATCTCTGCAGGCAAATGT-----                                                             | mirL    | 22  | 175   |
| -----GGGAAATCTCTGCAGGCAAATG-----                                                              | mirL    | 20  | 111   |
| -----GGGAAATCTCTGCAGGCAAATG-----                                                              | mirL    | 22  | 72    |
| -----GGGAAATCTCTGCAGGCAAAT-----                                                               | mirL    | 21  | 68    |
| -----GGGAAATCTCTGCAGGCAA-----                                                                 | mirL    | 18  | 26    |
| -----GGGAAATCTCTGCAGGCAA-----                                                                 | mirL    | 19  | 21    |
| -----GGAAATCTCTGCAGGCAAATGTGA-----                                                            | mirL    | 24  | 20    |
| -----AAATCTCTGCAGGCAAATGT-----                                                                | mirL    | 20  | 11    |
| -----AAATCTCTGCAGGCAAATG-----                                                                 | mirL    | 19  | 11    |
| -----GAAATCTCTGCAGGCAAATGTGA-----                                                             | mirL    | 23  | 6     |
| -----GGAAATCTCTGCAGGCAAATG-----                                                               | mirL    | 21  | 4     |
| -----GGAAATCTCTGCAGGCAAATGT-----                                                              | mirL    | 22  | 3     |
| -----GAAATCTCTGCAGGCAAAT-----                                                                 | mirL    | 19  | 3     |
| -----TGGGAAATCTCTGCAGGCAAATGTGA-----                                                          | mirL    | 26  | 3     |
| -----AAATCTCTGCAGGCAAATGTG-----                                                               | mirL    | 21  | 2     |
| -----GAAATCTCTGCAGGCAAAT-----                                                                 | mirL    | 18  | 2     |
| -----GAAATCTCTGCAGGCAAATG-----                                                                | mirL    | 20  | 1     |
| -----GAAATCTCTGCAGGCAAATGT-----                                                               | mirL    | 21  | 1     |
| -----TGGGAAATCTCTGCAGGCAAAT-----                                                              | mirL    | 22  | 1     |
| -----GGAAATCTCTGCAGGCAA-----                                                                  | mirL    | 18  | 1     |
| -----AGAAACCACACACTTACC-----                                                                  | mirR    | 18  | 4     |
| -----AAGAAACCACACACTTACC-----                                                                 | mirR    | 19  | 4     |
| -----AAACCACACACTTACCTGT-----                                                                 | mirR    | 19  | 1     |
| -----AAACCACACACTTACCTG-----                                                                  | mirR    | 18  | 1     |
| -----GTAGAGATTCTTCAGTCT--                                                                     | morR    | 18  | 3     |
| -----ACCTGTAGAGATTCTTCA-----                                                                  | morR    | 18  | 2     |
| -----TAGAGATTCTTCAGTCTGA                                                                      | morR    | 19  | 2     |
| -----CTGTAGAGATTCTTCAGT----                                                                   | morR    | 18  | 1     |

>mmu-mir-758

| Sequence                                                                                                     | species | len | reads |
|--------------------------------------------------------------------------------------------------------------|---------|-----|-------|
| ATACACGTGTGGGTGCGTGAGGTTGACCAGAGAGCACACGCTATATTTGTGCCGTTTGTGACCTGGTCCACTAACCCCTCAGTATCTAACCTTCCCTTGGAGAACTTC | morL    | 21  | 2     |
| -TACACGTGTGGGTGCGTGAGG-----                                                                                  | morL    | 19  | 1     |
| ---CACGTGTGGGTGCGTGAGG-----                                                                                  | morL    | 20  | 1     |
| ATACACGTGTGGGTGCGTGA-----                                                                                    | morL    | 22  | 1     |
| ---CACGTGTGGGTGCGTGAGGTGG-----                                                                               | mirL    | 21  | 115   |
| -----TGGTTGACCAGAGAGCACACG-----                                                                              | mirL    | 22  | 37    |
| -----TGGTTGACCAGAGAGCACACGC-----                                                                             | mirL    | 20  | 10    |
| -----TGGTTGACCAGAGAGCACAC-----                                                                               | mirL    | 18  | 8     |
| -----GTGGTTGACCAGAGAGCA-----                                                                                 | mirL    | 19  | 4     |
| -----GGTTGACCAGAGAGCACAC-----                                                                                | mirL    | 18  | 4     |
| -----TGGTTGACCAGAGAGCACA-----                                                                                | mirL    | 19  | 3     |
| -----GGTTGACCAGAGAGCACACG-----                                                                               | mirL    | 20  | 3     |
| -----TGGTTGACCAGAGAGCACACGCT-----                                                                            | mirL    | 23  | 3     |
| -----GGTTGACCAGAGAGCACACGC-----                                                                              | mirL    | 21  | 2     |
| -----GTTGACCAGAGAGCACAC-----                                                                                 | mirL    | 18  | 2     |
| -----TTGACCAGAGAGCACACGC-----                                                                                | mirL    | 19  | 1     |
| -----TTTGTGACCTGGTCCACTAAC-----                                                                              | mirR    | 22  | 1100  |
| -----TTTGTGACCTGGTCCACTAACCC-----                                                                            | mirR    | 23  | 1068  |
| -----TTTGTGACCTGGTCCACTA-----                                                                                | mirR    | 19  | 518   |
| -----TTTGTGACCTGGTCCACTAACCCCT-----                                                                          | mirR    | 24  | 241   |
| -----TTTGTGACCTGGTCCACTAAC-----                                                                              | mirR    | 21  | 229   |
| -----TTTGTGACCTGGTCCACTAA-----                                                                               | mirR    | 20  | 83    |
| -----TTGTGACCTGGTCCACTAACCC-----                                                                             | mirR    | 22  | 66    |
| -----TTTGTGACCTGGTCCACT-----                                                                                 | mirR    | 18  | 58    |
| -----TTGTGACCTGGTCCACTAACCC-----                                                                             | mirR    | 21  | 34    |
| -----TTTGTGACCTGGTCCACTA-----                                                                                | mirR    | 18  | 23    |
| -----TTGTGACCTGGTCCACTAACCCCT-----                                                                           | mirR    | 23  | 17    |
| -----TTTGTGACCTGGTCCACTAAC-----                                                                              | mirR    | 20  | 15    |
| -----GTTTGTGACCTGGTCCACT-----                                                                                | mirR    | 18  | 10    |
| -----GTGACCTGGTCCACTAACCC-----                                                                               | mirR    | 19  | 9     |
| -----TTGTGACCTGGTCCACTAACCCCTC-----                                                                          | mirR    | 24  | 5     |
| -----TGTGACCTGGTCCACTAACCC-----                                                                              | mirR    | 20  | 4     |
| -----TTGTGACCTGGTCCACTAA-----                                                                                | mirR    | 19  | 3     |
| -----CGTTTGTGACCTGGTCCA-----                                                                                 | mirR    | 18  | 3     |
| -----GTTTGTGACCTGGTCCACTA-----                                                                               | mirR    | 20  | 1     |
| -----GTGACCTGGTCCACTAAC-----                                                                                 | mirR    | 18  | 1     |
| -----GTGACCTGGTCCACTAACCCCTC-----                                                                            | mirR    | 22  | 1     |
| -----TCAGTATCTAACCTTCCCT-----                                                                                | morR    | 19  | 2     |
| -----ACCCTCAGTATCTAACCT-----                                                                                 | morR    | 18  | 1     |
| -----CAGTATCTAACCTTCCCT-----                                                                                 | morR    | 18  | 1     |
| -----CCTCAGTATCTAACCTTC-----                                                                                 | morR    | 18  | 1     |
| -----TCAGTATCTAACCTTCCCTTGGAGAACTTC-----                                                                     | morR    | 30  | 1     |

```

>mmu-mir-669d
GCTTGCTCTATATGTGTATACTTGTGTGTCATGTATATGTGTGTATATGAATATACATATACATACACACCCATATACACACGCATGCATGCACACACACAAA species len reads
GCTTGCTCTATATGTGTG-----ACTTGTGTGTCATGTATATGT-----mirL 18 1
-----ACTTGTGTGTCATGTATATGT-----mirL 22 2238
-----ACTTGTGTGTCATGTATATG-----mirL 21 243
-----ACTTGTGTGTCATGTATAT-----mirL 20 156
-----ACTTGTGTGTCATGTATATGTGT-----mirL 24 144
-----ACTTGTGTGTCATGTATATGTG-----mirL 23 93
-----CTTGTGTGTCATGTATATGT-----mirL 21 61
-----CTTGTGTGTCATGTATATGTGT-----mirL 23 48
-----ACTTGTGTGTCATGTATA-----mirL 19 27
-----ACTTGTGTGTCATGTAT-----mirL 18 11
-----TACTTGTGTGTCATGTATATGT-----mirL 23 8
-----CTTGTGTGTCATGTATATG-----mirL 20 6
-----CTTGTGTGTCATGTATAT-----mirL 19 4
-----TACTTGTGTGTCATGTATAT-----mirL 21 4
-----TATACTTGTGTGTCATGTATA-----mirL 22 3
-----CTTGTGTGTCATGTATATGTG-----mirL 22 3
-----TATACTTGTGTGTCATGTAT-----mirL 21 2
-----ATACTTGTGTGTCATGTATAT-----mirL 22 2
-----ATACTTGTGTGTCATGTA-----mirL 19 2
-----CTTGTGTGTCATGTATATGTGTG-----mirL 24 1
-----CTTGTGTGTCATGTATATGTGTGT-----mirL 25 1
-----TACTTGTGTGTCATGTAT-----mirL 19 1
-----ATATACATACACCCATATAC-----mirR 22 322
-----TATACATACACCCATATAC-----mirR 21 107
-----TATACATACACCCATATACA-----mirR 22 50
-----ATACATACACCCATATACAC-----mirR 22 37
-----ATATACATACACCCATATACA-----mirR 23 14
-----ATACATACACCCATATAC-----mirR 20 12
-----CATATACATACACCCATATAC-----mirR 23 10
-----ATACATACACCCATATACA-----mirR 21 1
-----ATATACATACACCCATATACAC-----mirR 24 1
-----TATACATACACCCATATACAC-----mirR 23 1
-----CAGGCATGCATGCACACACACA---morR 22 20
-----CGCATGCATGCACACACACAAA---morR 21 17
-----ACAGGCATGCATGCACACACAC---morR 22 4
-----ACGCATGCATGCACACACACAAA---morR 22 4
-----CAGGCATGCATGCACACACAC---morR 21 4
-----ACACAGGCATGCATGCAC-----morR 18 3
-----CAGGCATGCATGCACACACACAAA---morR 24 3
-----CAGGCATGCATGCACACACACAAA---morR 23 3
-----CAGGCATGCATGCACACACACA---morR 20 2
-----CACAGGCATGCATGCACACAC---morR 21 2
-----ACAGGCATGCATGCACACAC---morR 18 2
-----ACGCATGCATGCACACAC---morR 18 1

```

```

-----ACACGCATGCATGCACACACA---- morR 21 1
-----TACACACGCATGCATGCACAC----- morR 21 1
-----CGCATGCATGCACACACAC--- morR 19 1
-----ACACGCATGCATGCACACAC----- morR 20 1
-----ACGCATGCATGCACACACAC--- morR 20 1
-----CACACGCATGCATGCACAC----- morR 19 1
-----ACACACGCATGCATGCACA----- morR 19 1
-----CGCATGCATGCACACACACA-- morR 20 1
-----ACACACGCATGCATGCACACAC----- morR 22 1

>mmu-mir-3062
AGGCCATGGTGAGGAAGCCAGGGAGAATGTAGTGTTACCGTGAGCCTGTCAGCAAATACCACTCACGGGGACACACTTCTCCTTCATGGGTCTCCCCACTGCAG species len reads
--GCCATGGTGAGGAAGCCA----- morL 18 3
--GCCATGGTGAGGAAGCCAG----- morL 19 2
AGGCCATGGTGAGGAAGCC----- morL 19 2
---CCATGGTGAGGAAGCCAGGGA----- morL 21 2
---CCATGGTGAGGAAGCCAGG----- morL 19 2
---CCATGGTGAGGAAGCCAG----- morL 18 1
-----TGGTGAGGAAGCCAGGGA----- morL 18 1
-----ATGGTGAGGAAGCCAGGG----- morL 18 1
-----ATGGTGAGGAAGCCAGGGA----- morL 19 1
-GGCCATGGTGAGGAAGCCA----- morL 19 1
AGGCCATGGTGAGGAAGC----- morL 18 1
-----GGAGAATGTAGTGTTACCGTGA----- mirL 22 2965
-----GGAGAATGTAGTGTTACCGTGAG----- mirL 23 223
-----GGAGAATGTAGTGTTACCGTG----- mirL 21 167
-----GGGAGAATGTAGTGTTACCGTG----- mirL 22 53
-----GGGAGAATGTAGTGTTACCGTGA----- mirL 23 23
-----CAGGGAGAATGTAGTGTTACCGTG----- mirL 24 21
-----GGAGAATGTAGTGTTACCGTGAGC----- mirL 24 12
-----AGGGAGAATGTAGTGTTACCGTGA----- mirL 24 10
-----GGAGAATGTAGTGTTACCGT----- mirL 20 6
-----GGAGAATGTAGTGTTACCGTGAGCC----- mirL 25 3
-----GGGAGAATGTAGTGTTACCGT----- mirL 21 2
-----GGAGAATGTAGTGTTACCGTGAGCCT----- mirL 26 2
-----GGGAGAATGTAGTGTTAC----- mirL 18 1
-----GAGAATGTAGTGTTACCG----- mirL 18 1
-----GGGAGAATGTAGTGTTACCGTGAG----- mirL 24 1
-----AGGGAGAATGTAGTGTTA----- mirL 18 1
-----CAGGGAGAATGTAGTGTTACCGT----- mirL 23 1
-----CAGGGAGAATGTAGTGTTACCGTGA----- mirL 25 1
-----GAGAATGTAGTGTTACCGTGAG----- mirL 22 1
-----AGCCTGTCAGCAAATACCACTCA----- loop 23 86
-----GCCTGTCAGCAAATACCACTC----- loop 21 46
-----GCCTGTCAGCAAATACCACT----- loop 20 10
-----AGCCTGTCAGCAAATACCACTCAC----- loop 24 6

```

```

-----AGCCTGTCAGCAAATACCACTC----- loop 22 3
-----AGCCTGTCAGCAAATACCACT----- loop 21 1
-----CTGTCAGCAAATACCACT----- loop 18 1
-----CGGGGACACACTTTCCTCCTT----- mirR 20 9
-----CGGGGACACACTTTCCTCCTT----- mirR 19 3
-----GGGACACACTTTCCTCCTTC----- mirR 19 1
-----GGACACACTTTCCTCCTTC----- mirR 18 1
-----GGGACACACTTTCCTCCTT----- mirR 18 1
-----CGGGGACACACTTTCCTCCTTC----- mirR 21 1
-----CGGGGACACACTTTCCTCCTCA----- mirR 22 1
-----CATGGGTCTCCCCACTGC----- morR 18 1
-----CTTCATGGGTCTCCCCAC----- morR 18 1
-----TGGGTCTCCCCACTGCAG----- morR 18 1
-----ATGGGTCTCCCCACTGCAG----- morR 19 1

```

>mmu-mir-669d-2

| Species | len | reads |
|---------|-----|-------|
| morL    | 20  | 11    |
| morL    | 21  | 2     |
| morL    | 22  | 1     |
| morL    | 22  | 1     |
| morL    | 22  | 1     |
| morL    | 19  | 1     |
| morL    | 19  | 1     |
| mirL    | 22  | 2238  |
| mirL    | 21  | 243   |
| mirL    | 20  | 156   |
| mirL    | 24  | 144   |
| mirL    | 23  | 93    |
| mirL    | 21  | 61    |
| mirL    | 23  | 48    |
| mirL    | 19  | 27    |
| mirL    | 18  | 11    |
| mirL    | 23  | 8     |
| mirL    | 20  | 6     |
| mirL    | 21  | 4     |
| mirL    | 19  | 4     |
| mirL    | 22  | 3     |
| mirL    | 22  | 3     |
| mirL    | 21  | 2     |
| mirL    | 19  | 2     |
| mirL    | 22  | 2     |
| mirL    | 23  | 1     |
| mirL    | 19  | 1     |
| mirR    | 22  | 322   |
| mirR    | 21  | 107   |

```

-----TATACATACACACCCATATACA----- mirR 22 50
-----ATACATACACACCCATATACAC----- mirR 22 37
-----ATATACATACACACCCATATACA----- mirR 23 14
-----ATACATACACACCCATATAC----- mirR 20 12
-----CATATACATACACACCCATATAC----- mirR 23 10
-----ATACATACACACCCATATACA----- mirR 21 1
-----TATACATACACACCCATATACAC----- mirR 23 1
-----ATATACATACACACCCATATACAC----- mirR 24 1
-----ACACGCATGCACGGAAAC----- morR 18 8
-----ACACGCATGCACGGAAACACAAAAACATA--- morR 29 6
-----TACACACGCATGCACGGA----- morR 18 2
-----ACACGCATGCACGGAAACACAAAAACATAAAC morR 32 1
-----ACACACGCATGCACGGAAA----- morR 19 1
-----ACACGCATGCACGGAAACACAAAAAC----- morR 26 1
-----ACGCATGCACGGAAACAC----- morR 18 1
-----CGCATGCACGGAAACACA----- morR 18 1

```

>mmu-mir-200c

```

ACTGGTTGGGTAGGGGCCCTCGTCTTACCCAGCAGTGTGGGTGCTGGTTGGGAGTCTCTAATACTGCCGGTAATGATGGAGGCCCTGTCCAGTGTTCATC species len reads
---GGTTGGGTAGGGGCCCTC----- morL 18 3
--TGGTTGGGTAGGGGCCCT----- morL 18 2
-CTGGTTGGGTAGGGGCCCTC----- morL 20 1
ACTGGTTGGGTAGGGGCCCTC----- morL 21 1
-----CGTCTTACCCAGCAGTGTGG----- mirL 21 204
-----CGTCTTACCCAGCAGTGTGG----- mirL 22 201
-----CGTCTTACCCAGCAGTGTGG----- mirL 20 42
-----CGTCTTACCCAGCAGTGT----- mirL 18 33
-----CTTACCCAGCAGTGTGG----- mirL 18 22
-----CGTCTTACCCAGCAGTGTGGGTGCT----- mirL 27 12
-----GTCTTACCCAGCAGTGTGG----- mirL 20 10
-----TCTTACCCAGCAGTGTGG----- mirL 18 10
-----CGTCTTACCCAGCAGTGTGGG----- mirL 23 5
-----CTTACCCAGCAGTGTGG----- mirL 19 4
-----GTCTTACCCAGCAGTGTGG----- mirL 18 3
-----TCTTACCCAGCAGTGTGG----- mirL 19 3
-----CGTCTTACCCAGCAGTGTGG----- mirL 19 2
-----CTCGTCTTACCCAGCAGT----- mirL 18 2
-----CCTCGTCTTACCCAGCAG----- mirL 18 1
-----GTGCTGGTTGGGAGTCTC----- loop 18 7
-----GCTGGTTGGGAGTCTCTA----- loop 18 2
-----TGGGTGCTGGTTGGGAGT----- loop 18 1
-----TGCTGGTTGGGAGTCTCTA----- loop 19 1
-----GTGCTGGTTGGGAGTCTCTA----- loop 20 1
-----GTGCTGGTTGGGAGTCTCT----- loop 19 1
-----GGTGCTGGTTGGGAGTCTCT----- loop 20 1
-----TAATACTGCCGGTAATGATGGA----- mirR 23 929

```



```

-----TAATACTGCCGGGTAATGATGGAG----- mirR 24 465
-----TAATACTGCCGGGTAATGATG----- mirR 21 325
-----TAATACTGCCGGGTAATGATGG----- mirR 22 251
-----TAATACTGCCGGGTAATGATGGAGG----- mirR 25 205
-----AATACTGCCGGGTAATGATGGA----- mirR 22 169
-----CTAATACTGCCGGGTAATGATG----- mirR 22 112
-----TAATACTGCCGGGTAATGA----- mirR 19 77
-----TAATACTGCCGGGTAATGATGGAGGC----- mirR 26 70
-----CTAATACTGCCGGGTAATGATGGA----- mirR 24 67
-----AATACTGCCGGGTAATGATG----- mirR 20 55
-----AATACTGCCGGGTAATGATGGAG----- mirR 23 55
-----CTAATACTGCCGGGTAATGATGGAG----- mirR 25 46
-----AATACTGCCGGGTAATGATGG----- mirR 21 41
-----CTAATACTGCCGGGTAATGAT----- mirR 21 35
-----CTAATACTGCCGGGTAATGATGG----- mirR 23 21
-----AATACTGCCGGGTAATGATGGAGG----- mirR 24 19
-----AATACTGCCGGGTAATGATGGAGGC----- mirR 25 14
-----ATACTGCCGGGTAATGATG----- mirR 19 14
-----AATACTGCCGGGTAATGAT----- mirR 19 13
-----CTAATACTGCCGGGTAATGATGGAGG----- mirR 26 9
-----CTAATACTGCCGGGTAATGATGGAGGC----- mirR 27 6
-----CTCTAATACTGCCGGGTAATGAT----- mirR 23 2
-----ATACTGCCGGGTAATGATGGAGG----- mirR 23 2
-----TCTAATACTGCCGGGTAATGAT----- mirR 22 1
-----ATACTGCCGGGTAATGATGG----- mirR 20 1
-----CTCTAATACTGCCGGGTAATGATG----- mirR 24 1
-----GCCCCTGTCCCAGTGTC----- morR 18 63
-----CCCTGTCCCAGTGTCATC----- morR 18 3
-----GCCCCTGTCCCAGTGTCAT----- morR 19 1
-----AGGCCCTGTCCCAGTGT----- morR 18 1
-----GAGGCCCTGTCCCAGTG----- morR 18 1

>mmu-mir-194-2
CACCTGTGCTGACCCCCGTGGCTCCCACCCTCTGTAACAGCAACTCCATGTGGAAGTGCCCACTGGTTCCAGTGGGGCTGCTGTTATCTGGGGTGGCGGCTAGTACCA species len reads
-----CCCCGTGGCTCCCACCCTC----- morL 19 24
-----CCCCGTGGCTCCCACCCTC----- morL 20 15
-----CCCCGTGGCTCCCACC----- morL 18 13
-----CCCCCGTGGCTCCCACCCT----- morL 20 9
-----CCCCGTGGCTCCCACCCT----- morL 19 2
-----CCCCCGTGGCTCCCACCCTC----- morL 21 2
-----ACCCCCGTGGCTCCCACCCTC----- morL 22 1
-----CCCCCGTGGCTCCCACC----- morL 19 1
CACCTGTGCTGACCCCCGTGGCTCCCACCCTC----- morL 33 1
-----GACCCCCGTGGCTCCCACCCTC----- morL 23 1
-----CCCCCGTGGCTCCCACCCTCT----- morL 22 1
-----CCCCCGTGGCTCCCACC----- morL 18 1

```

```

-----GTGGCTCCCACCCTCTGT----- morL 18 1
-----CCGTGGCTCCCACCCTCT----- morL 18 1
-----TGTAACAGCAACTCCATGTGGA----- mirL 22 1773
-----TGTAACAGCAACTCCATGTGGAA----- mirL 23 612
-----TGTAACAGCAACTCCATGTGG----- mirL 21 469
-----TGTAACAGCAACTCCATGTGGAAG----- mirL 24 337
-----TGTAACAGCAACTCCATGT----- mirL 19 30
-----TGTAACAGCAACTCCATGTG----- mirL 20 28
-----GTAACAGCAACTCCATGTGG----- mirL 20 26
-----GTAACAGCAACTCCATGTGGA----- mirL 21 22
-----GTAACAGCAACTCCATGTGGAA----- mirL 22 21
-----TGTAACAGCAACTCCATGTGGAAGT----- mirL 25 21
-----CTGTAACAGCAACTCCATGTGG----- mirL 22 15
-----CTGTAACAGCAACTCCATGTGGA----- mirL 23 15
-----CTGTAACAGCAACTCCATGTGGAA----- mirL 24 10
-----TCTGTAACAGCAACTCCA----- mirL 18 3
-----GTAACAGCAACTCCATGTGGAAG----- mirL 23 2
-----GTAACAGCAACTCCATGTGGAAGT----- mirL 24 2
-----AACAGCAACTCCATGTGG----- mirL 18 1
-----GTAACAGCAACTCCATGTG----- mirL 19 1
-----GTAACAGCAACTCCATGTGGAAGTG----- mirL 25 1
-----CTGTAACAGCAACTCCATGT----- mirL 20 1
-----GGAAGTGCCCACTGGTTC----- loop 18 2
-----GAAGTGCCCACTGGTTC----- loop 18 1
-----CCAGTGGGGCTGCTGTTATCTG----- mirR 22 30
-----CCAGTGGGGCTGCTGTTATCTGG----- mirR 23 13
-----CCAGTGGGGCTGCTGTTATCTGGG----- mirR 24 4
-----CCAGTGGGGCTGCTGTTATCT----- mirR 21 2
-----CCAGTGGGGCTGCTGTTATC----- mirR 20 1
-----CAGTGGGGCTGCTGTTATCT----- mirR 20 1
-----GTTCCAGTGGGGCTGCTG----- mirR 18 1
-----CAGTGGGGCTGCTGTTATCTGG----- mirR 22 1
-----TGGGGTGGCGGCTAGTAC----- morR 18 8
-----GGGTGGCGGCTAGTACCA----- morR 18 4

```

>mmu-mir-1943

```

CCTGGGGAGCCTCTGGCTGGGAAGGGAGGATCTGGGCACCTGGACCAGCTCCTCCCTGCAGGTGCCAGCTCCTCCCTTCCCAGTCACCAGGACCAGCATC species len reads
-----GAGCCTCTGGCTGGGAAG----- morL 18 3
-----GGGAGCCTCTGGCTGGGA----- morL 18 1
-----GGGGAGCCTCTGGCTGGGA----- morL 19 1
-----TGGGGAGCCTCTGGCTGGG----- morL 19 1
CCTGGGGAGCCTCTGGCT----- morL 18 1
-----GGGAGCCTCTGGCTGGGA----- morL 19 1
-----TGGGGAGCCTCTGGCTGG----- morL 18 1
-----AAGGGAGGATCTGGGCACCTGGA----- mirL 23 1103
-----AGGGAGGATCTGGGCACCTGGA----- mirL 22 736

```

```

-----AAGGGAGGATCTGGGCACCTGG----- mirL 22 241
-----AAGGGAGGATCTGGGCACCTG----- mirL 21 222
-----AGGGAGGATCTGGGCACCTGG----- mirL 21 84
-----AGGGAGGATCTGGGCACCTGGAC----- mirL 23 59
-----AAGGGAGGATCTGGGCACC----- mirL 19 38
-----AGGGAGGATCTGGGCACCTGGACC----- mirL 24 35
-----GAAGGGAGGATCTGGGCACCTGG----- mirL 23 27
-----GGGAGGATCTGGGCACCTGGA----- mirL 21 25
-----AAGGGAGGATCTGGGCACCTGGACC----- mirL 25 24
-----AGGGAGGATCTGGGCACCTG----- mirL 20 20
-----GGAGGATCTGGGCACCTGGA----- mirL 20 11
-----AAGGGAGGATCTGGGCACCT----- mirL 20 11
-----AAGGGAGGATCTGGGCACCTGGAC----- mirL 24 9
-----GGAGGATCTGGGCACCTGG----- mirL 19 8
-----GAAGGGAGGATCTGGGCACCTGGA----- mirL 24 7
-----AGGGAGGATCTGGGCACC----- mirL 18 7
-----GGAGGATCTGGGCACCTG----- mirL 18 5
-----GGGAGGATCTGGGCACCT----- mirL 18 4
-----AGGGAGGATCTGGGCACCT----- mirL 19 3
-----GGGAGGATCTGGGCACCTG----- mirL 19 3
-----GAAGGGAGGATCTGGGCACC----- mirL 20 1
-----GGGAAGGGAGGATCTGGG----- mirL 18 1
-----GAAGGGAGGATCTGGGCACCTG----- mirL 22 1
-----GGGAGGATCTGGGCACCTGG----- mirL 20 1
-----ACCAGTCCTCCCTGCAG----- loop 18 3
-----CAGGTGCCAGCTCCTCCCTTC----- mirR 21 366
-----CAGGTGCCAGCTCCTCCCTT----- mirR 20 315
-----CAGGTGCCAGCTCCTCCCTTCC----- mirR 22 89
-----GGTGCCAGCTCCTCCCTTCCCA----- mirR 22 11
-----CAGGTGCCAGCTCCTCCCT----- mirR 19 9
-----CAGGTGCCAGCTCCTCCCTTCCC----- mirR 23 8
-----CAGGTGCCAGCTCCTCCCT----- mirR 18 6
-----CAGGTGCCAGCTCCTCCCTTCCCAG----- mirR 25 3
-----GGTGCCAGCTCCTCCCTTCC----- mirR 20 2
-----GTGCCAGCTCCTCCCTTC----- mirR 18 1
-----TGCAGGTGCCAGCTCCTCCCTTC----- mirR 23 1
-----GGTGCCAGCTCCTCCCTTC----- mirR 19 1
-----GCAGGTGCCAGCTCCTCCCTT----- mirR 21 1
-----AGGTGCCAGCTCCTCCCT----- mirR 18 1
-----GCAGGTGCCAGCTCCTCC----- mirR 18 1
-----TTCCAGTCACCAGGACCA----- morR 19 3
-----TCCAGTCACCAGGACCA----- morR 18 3
-----CCCAGTCACCAGGACCAG----- morR 18 1
-----CAGTCACCAGGACCAGCA----- morR 18 1
-----GTCACCAGGACCAGCATC----- morR 18 1

```

>mmu-mir-467c

| Sequence                                                                                                       | species | len | reads |
|----------------------------------------------------------------------------------------------------------------|---------|-----|-------|
| TGGCCCCATGTCATGTGCCTTTGTGCATAAGTGCCTGCATGTATATGTGTGTATATTTTATGCATATACATACACACACCTATACACACATGCACACAGACATGCGAGAA | morL    | 26  | 9     |
| TGGCCCCATGTCATGTGCCTTTGTGC-----                                                                                | morL    | 19  | 6     |
| -----TATGCATGTGCCTTTGTGC-----                                                                                  | morL    | 20  | 2     |
| -----CTATGCATGTGCCTTTGTGC-----                                                                                 | morL    | 21  | 2     |
| -----TATGCATGTGCCTTTGTGCAT-----                                                                                | morL    | 19  | 2     |
| -----ATGCATGTGCCTTTGTGCA-----                                                                                  | morL    | 18  | 2     |
| -----ATGCATGTGCCTTTGTGC-----                                                                                   | morL    | 25  | 2     |
| --GCCCTATGCATGTGCCTTTGTGCA-----                                                                                | morL    | 18  | 1     |
| -----TGCATGTGCCTTTGTGCA-----                                                                                   | mirL    | 22  | 1852  |
| -----ATAAGTGCCTGCATGTATATGT-----                                                                               | mirL    | 21  | 456   |
| -----TAAGTGCCTGCATGTATATGT-----                                                                                | mirL    | 21  | 162   |
| -----ATAAGTGCCTGCATGTATATG-----                                                                                | mirL    | 23  | 154   |
| -----ATAAGTGCCTGCATGTATATGTG-----                                                                              | mirL    | 22  | 153   |
| -----TAAGTGCCTGCATGTATATGTG-----                                                                               | mirL    | 23  | 143   |
| -----TAAGTGCCTGCATGTATATGT-----                                                                                | mirL    | 20  | 106   |
| -----ATAAGTGCCTGCATGTATATG-----                                                                                | mirL    | 20  | 51    |
| -----AAGTGCCTGCATGTATATGT-----                                                                                 | mirL    | 24  | 30    |
| -----ATAAGTGCCTGCATGTATATGTG-----                                                                              | mirL    | 22  | 30    |
| -----AAGTGCCTGCATGTATATG-----                                                                                  | mirL    | 19  | 29    |
| -----TAAGTGCCTGCATGTATATG-----                                                                                 | mirL    | 21  | 27    |
| -----AAGTGCCTGCATGTATATG-----                                                                                  | mirL    | 19  | 14    |
| -----ATAAGTGCCTGCATGTATATG-----                                                                                | mirL    | 19  | 14    |
| -----AAGTGCCTGCATGTATATG-----                                                                                  | mirL    | 25  | 8     |
| -----ATAAGTGCCTGCATGTATATGTG-----                                                                              | mirL    | 18  | 6     |
| -----AAGTGCCTGCATGTATATG-----                                                                                  | mirL    | 25  | 4     |
| -----TAAGTGCCTGCATGTATATGTG-----                                                                               | mirL    | 18  | 4     |
| -----TAAGTGCCTGCATGTATATG-----                                                                                 | mirL    | 24  | 1     |
| -----AAGTGCCTGCATGTATATGTG-----                                                                                | mirL    | 22  | 1     |
| -----AGTGCCTGCATGTATATGTG-----                                                                                 | mirL    | 18  | 1     |
| -----AGTGCCTGCATGTATATG-----                                                                                   | mirL    | 21  | 1     |
| -----GCATAAGTGCCTGCATGTATATG-----                                                                              | mirL    | 22  | 1     |
| -----CATAAGTGCCTGCATGTATATG-----                                                                               | mirL    | 22  | 1     |
| -----ATATACATACACACACCTATAC-----                                                                               | mirR    | 22  | 62    |
| -----ATACATACACACACCTATACAC-----                                                                               | mirR    | 22  | 29    |
| -----TATACATACACACACCTATAC-----                                                                                | mirR    | 21  | 13    |
| -----ATACATACACACACCTATAC-----                                                                                 | mirR    | 20  | 6     |
| -----ATATACATACACACACCTATACA-----                                                                              | mirR    | 23  | 4     |
| -----TATACATACACACACCTATACA-----                                                                               | mirR    | 22  | 3     |
| -----ATACATACACACACCTATACACA-----                                                                              | mirR    | 23  | 2     |
| -----TACATACACACACCTATACAC-----                                                                                | mirR    | 21  | 1     |
| -----ATACATACACACACCTATACAC-----                                                                               | mirR    | 21  | 1     |
| -----ATATACATACACACACCTATACAC-----                                                                             | mirR    | 24  | 1     |
| -----TACATACACACACCTATACAC-----                                                                                | mirR    | 19  | 1     |
| -----ATACATACACACACCTATACACAC-----                                                                             | mirR    | 24  | 1     |

```

-----ATATACATACACACACCTATACACA----- mirR 25 1
-----TACACACATGCACACAGAC----- morR 19 2
-----CACACATGCACACAGACATGCGAGAA morR 26 1

>mmu-mir-450b
AGGAATCAGATACAGAATTATTTTGCAGTATGTTCCCTGAATACATAACATAAGCGTATTGGGAACATTTTGCATGCATAATTTGTATCAATATATG species len reads
AGGAATCAGATACAGAAT----- morL 18 3
--GAATCAGATACAGAATTA----- morL 18 1
-----TTTTGCAGTATGTTCCCTGAATA----- mirL 22 313
-----TTTTGCAGTATGTTCCCTGAAT----- mirL 21 237
-----TTTTGCAGTATGTTCCCTGAA----- mirL 20 129
-----TTTTGCAGTATGTTCCCTGA----- mirL 19 68
-----TTTGCAGTATGTTCCCTGAAT----- mirL 20 20
-----TTTTGCAGTATGTTCCCTGAATAC----- mirL 23 17
-----TTTTGCAGTATGTTCCCTGAATACA----- mirL 24 16
-----TTTGCAGTATGTTCCCTGAA----- mirL 19 14
-----TTTGCAGTATGTTCCCTGAATA----- mirL 21 14
-----TTTTGCAGTATGTTCCCTG----- mirL 18 14
-----TTGCAGTATGTTCCCTGAA----- mirL 18 6
-----TTGCAGTATGTTCCCTGAATA----- mirL 20 5
-----TTTTTGCAGTATGTTCCCTGAA----- mirL 21 4
-----TGCAGTATGTTCCCTGAATA----- mirL 19 4
-----TATTTTTGCAGTATGTTCC----- mirL 18 1
-----TTTGCAGTATGTTCCCTGAATAC----- mirL 22 1
-----TTTGCAGTATGTTCCCTGA----- mirL 18 1
-----ATTTTTGCAGTATGTTCCCT----- mirL 19 1
-----ACATAACATAAGCGTATT----- loop 18 1
-----ATACATAACATAAGCGTA----- loop 18 1
-----ATTGGGAACATTTTGCATGCAT----- mirR 22 1283
-----ATTGGGAACATTTTGCATGCA----- mirR 21 345
-----TATTGGGAACATTTTGCATGCA----- mirR 22 333
-----TTGGGAACATTTTGCATGCAT----- mirR 21 166
-----TATTGGGAACATTTTGCATGC----- mirR 21 114
-----ATTGGGAACATTTTGCATGC----- mirR 20 95
-----ATTGGGAACATTTTGCATGCATA----- mirR 23 45
-----TTGGGAACATTTTGCATGCATA----- mirR 22 33
-----TGGGAACATTTTGCATGCAT----- mirR 20 24
-----TATTGGGAACATTTTGCATGCAT----- mirR 23 18
-----GTATTGGGAACATTTTGC----- mirR 18 17
-----CGTATTGGGAACATTTTGC----- mirR 18 17
-----ATTGGGAACATTTTGCATGC----- mirR 19 14
-----TTGGGAACATTTTGCATGCATAA----- mirR 23 8
-----TTGGGAACATTTTGCATGC----- mirR 19 7
-----TTGGGAACATTTTGCATGCA----- mirR 20 7
-----GTATTGGGAACATTTTGC----- mirR 19 6
-----ATTGGGAACATTTTGCATGCATAA----- mirR 24 6

```

```

-----TATTGGGAACATTTTGCATG----- mirR 20 6
-----GGGAACATTTTGCATGCA----- mirR 18 6
-----CGTATTGGGAACATTTTGC----- mirR 19 5
-----GGGAACATTTTGCATGCAT----- mirR 19 4
-----TGGAACATTTTGCATGCATAA----- mirR 22 4
-----TGGGAACATTTTGCATGCA----- mirR 19 3
-----TTGGGAACATTTTGCATG----- mirR 18 2
-----TTGGGAACATTTTGCATGCATAAT----- mirR 24 2
-----GGGAACATTTTGCATGCATA----- mirR 20 1
-----ATTTGTATCAATATATG----- morR 18 2
-----CATAATTTTGTATCAATAT----- morR 19 1

```

>mmu-mir-1955

| Species | len | reads |
|---------|-----|-------|
| morL    | 18  | 5     |
| morL    | 18  | 1     |
| morL    | 19  | 1     |
| mirL    | 25  | 1279  |
| mirL    | 22  | 494   |
| mirL    | 23  | 493   |
| mirL    | 24  | 437   |
| mirL    | 21  | 49    |
| mirL    | 19  | 48    |
| mirL    | 18  | 44    |
| mirL    | 23  | 37    |
| mirL    | 24  | 23    |
| mirL    | 28  | 16    |
| mirL    | 22  | 11    |
| mirL    | 23  | 11    |
| mirL    | 23  | 10    |
| mirL    | 26  | 9     |
| mirL    | 24  | 8     |
| mirL    | 22  | 5     |
| mirL    | 19  | 4     |
| mirL    | 20  | 3     |
| mirL    | 25  | 3     |
| mirL    | 22  | 3     |
| mirL    | 28  | 2     |
| mirL    | 21  | 1     |
| mirL    | 18  | 1     |
| mirL    | 19  | 1     |
| mirL    | 21  | 1     |
| mirL    | 20  | 1     |
| loop    | 18  | 1     |
| mirR    | 23  | 231   |
| mirR    | 21  | 90    |

```

-----GAGCATTGCATGCTGGGACATG----- mirR 22 40
-----AGAGCATTGCATGCTGGGACATGT----- mirR 24 13
-----GAGCATTGCATGCTGGGACATGTA----- mirR 24 9
-----GAGCATTGCATGCTGGGACA----- mirR 20 5
-----GAGCATTGCATGCTGGGACATGTAG----- mirR 25 4
-----GCATTGCATGCTGGGACA----- mirR 18 3
-----AGAGCATTGCATGCTGGGACA----- mirR 21 3
-----AAGAGCATTGCATGCTGGGACA----- mirR 22 1
-----AAGAGCATTGCATGCTGGGAC----- mirR 21 1
-----AGAGCATTGCATGCTGGGACAT----- mirR 22 1
-----TTGGTTTAAATAGCACGGAGAA morR 22 1
-----TGTTTAAATAGCACGGAG-- morR 19 1

```

>mmu-mir-1901

```

GGAGAAGGCGATGGGCAGGATTCCCTGAGTGAACGAGTTGAGGCGGCCCGACTGCCGCTCGTACTCCCGGGGGTCCCGGAGCCCAAAAAGCTGGCCG species len reads
GGAGAAGGCGATGGGCAG----- morL 18 2
----AAGGCGATGGGCAGGATT----- morL 18 1
---GAAGGCGATGGGCAGGAT----- morL 18 1
-----TCCCTGAGTGAACGAGTTGA----- mirL 20 11
-----TCCCTGAGTGAACGAGTT----- mirL 18 1
-----CCCTGAGTGAACGAGTTGA----- mirL 19 1
-----ATTCCCTGAGTGAACGAG----- mirL 18 1
-----TTCCCTGAGTGAACGAGT----- mirL 18 1
-----AGGCGGCCCGACTGCCG----- loop 18 2
-----TGAGGCGGCCCGACTGCCG----- loop 20 1
-----CCGCTCGTACTCCCGGGGGTCC----- mirR 22 2470
-----CCGCTCGTACTCCCGGGGGTCC----- mirR 21 343
-----CGCTCGTACTCCCGGGGGTCC----- mirR 21 172
-----CCGCTCGTACTCCCGGGGGT----- mirR 20 60
-----GCTCGTACTCCCGGGGGTCC----- mirR 20 50
-----CGCTCGTACTCCCGGGGGTCC----- mirR 20 29
-----CTCGTACTCCCGGGGGTCC----- mirR 19 18
-----CCGCTCGTACTCCCGGGGG----- mirR 19 17
-----CTCGTACTCCCGGGGGTCC----- mirR 18 14
-----CCGCTCGTACTCCCGGGG----- mirR 18 9
-----GCTCGTACTCCCGGGGGTCC----- mirR 19 8
-----GCCGCTCGTACTCCCGGGGGTCC----- mirR 22 6
-----GCCGCTCGTACTCCCGGG----- mirR 18 5
-----GCCGCTCGTACTCCCGGGGGTCC----- mirR 23 2
-----CGCTCGTACTCCCGGGGGTCCC----- mirR 22 2
-----CCGCTCGTACTCCCGGGGGTCCC----- mirR 23 2
-----CCGCTCGTACTCCCGGGGGTCCCGGAGC----- mirR 28 1
-----TCCCGGAGCCCAAAAAGCT----- morR 19 1
-----GAGCCCAAAAAGCTGGCCG morR 19 1
-----CCCGGAGCCCAAAAAGCTGG--- morR 20 1
-----TCCCGGAGCCCAAAAAGC----- morR 18 1

```

>mmu-mir-669g

| Sequence                                                                                        | species | len | reads |
|-------------------------------------------------------------------------------------------------|---------|-----|-------|
| ATGTGTGCTTACTTGTATGTGCATTGTATGTGTTGACATGATATACATAACATAAACACACACGTGTATCTGCAAGCACACACACAGGAAAAATT | morL    | 20  | 1     |
| ATGTGTGCTTACTTGTATGT-----                                                                       | mirL    | 22  | 2420  |
| -----TGCATTGTATGTGTTGACATGA-----                                                                | mirL    | 23  | 167   |
| -----TGCATTGTATGTGTTGACATGAT-----                                                               | mirL    | 21  | 162   |
| -----TGCATTGTATGTGTTGACATG-----                                                                 | mirL    | 21  | 95    |
| -----GCATTGTATGTGTTGACATGA-----                                                                 | mirL    | 23  | 63    |
| -----GTGCATTGTATGTGTTGACATGA-----                                                               | mirL    | 24  | 45    |
| -----TGCATTGTATGTGTTGACATGATA-----                                                              | mirL    | 20  | 29    |
| -----CATTGTATGTGTTGACATGA-----                                                                  | mirL    | 19  | 20    |
| -----TGCATTGTATGTGTTGACA-----                                                                   | mirL    | 25  | 18    |
| -----GTGCATTGTATGTGTTGACATGATA-----                                                             | mirL    | 20  | 17    |
| -----TGCATTGTATGTGTTGACAT-----                                                                  | mirL    | 24  | 16    |
| -----TGTGCATTGTATGTGTTGACATGA-----                                                              | mirL    | 22  | 15    |
| -----GCATTGTATGTGTTGACATGAT-----                                                                | mirL    | 20  | 11    |
| -----GCATTGTATGTGTTGACATG-----                                                                  | mirL    | 22  | 9     |
| -----GTGCATTGTATGTGTTGACATG-----                                                                | mirL    | 18  | 6     |
| -----GTGCATTGTATGTGTTGA-----                                                                    | mirL    | 24  | 6     |
| -----GTGCATTGTATGTGTTGACATGAT-----                                                              | mirL    | 19  | 6     |
| -----ATTGTATGTGTTGACATGA-----                                                                   | mirL    | 18  | 5     |
| -----ATTGTATGTGTTGACATG-----                                                                    | mirL    | 23  | 2     |
| -----TGTGCATTGTATGTGTTGACATG-----                                                               | mirL    | 19  | 2     |
| -----CATTGTATGTGTTGACATG-----                                                                   | mirL    | 18  | 2     |
| -----ATGTGCATTGTATGTGTT-----                                                                    | mirL    | 23  | 2     |
| -----GCATTGTATGTGTTGACATGATA-----                                                               | mirL    | 19  | 1     |
| -----GTGCATTGTATGTGTTGAC-----                                                                   | mirL    | 18  | 1     |
| -----TGCATTGTATGTGTTGAC-----                                                                    | mirL    | 26  | 1     |
| -----TGTGCATTGTATGTGTTGACATGATA-----                                                            | mirL    | 19  | 1     |
| -----GCATTGTATGTGTTGACAT-----                                                                   | mirL    | 18  | 1     |
| -----GCATTGTATGTGTTGACA-----                                                                    | loop    | 18  | 7     |
| -----TATACATAACATAAACAC-----                                                                    | loop    | 18  | 1     |
| -----ATATACATAACATAAAACA-----                                                                   | mirR    | 21  | 14    |
| -----CACACGTGTATCTGCAAGCAC-----                                                                 | mirR    | 18  | 2     |
| -----ACGTGTATCTGCAAGCAC-----                                                                    | mirR    | 19  | 1     |
| -----AACACACGTGTATCTGCAA-----                                                                   | mirR    | 22  | 1     |
| -----CACACGTGTATCTGCAAGCACA-----                                                                | mirR    | 22  | 1     |
| -----CACGTGTATCTGCAAGCACACA-----                                                                | mirR    | 22  | 1     |
| -----ACGTGTATCTGCAAGCACACAC-----                                                                | mirR    | 23  | 1     |
| -----CACACGTGTATCTGCAAGCACAC-----                                                               | morR    | 18  | 2     |
| -----ACACACACACAGGAAAAA-----                                                                    | morR    | 18  | 2     |
| -----ACACACACAGGAAAAAATT-----                                                                   | morR    | 19  | 1     |
| -----ACACACACACAGGAAAAAT-----                                                                   | morR    | 18  | 1     |
| -----CACACACACAGGAAAAAT-----                                                                    |         |     |       |

>mmu-mir-679



|                                                                              | species | len | reads |
|------------------------------------------------------------------------------|---------|-----|-------|
| CTGAGGCTACTCCCTATGGCTTTGGACTGTGAGGTGACTCTTGGTGTGTGATGGCTTTTCAGCAAGGTCTCTCTCA | morL    | 20  | 22    |
| -TGAGGCTACTCCCTATGGCT-----                                                   | morL    | 18  | 5     |
| ---AGGCTACTCCCTATGGCT-----                                                   | morL    | 19  | 4     |
| --GAGGCTACTCCCTATGGCT-----                                                   | morL    | 21  | 2     |
| CTGAGGCTACTCCCTATGGCT-----                                                   | morL    | 21  | 1     |
| -TGAGGCTACTCCCTATGGCTTT-----                                                 | morL    | 18  | 1     |
| --GAGGCTACTCCCTATGGC-----                                                    | morL    | 22  | 1     |
| -TGAGGCTACTCCCTATGGCTTT-----                                                 | morL    | 19  | 1     |
| -----GCTACTCCCTATGGCTTTG-----                                                | morL    | 18  | 1     |
| -----ACTCCCTATGGCTTTGGA-----                                                 | mirL    | 21  | 1274  |
| -----GGACTGTGAGGTGACTCTTGG-----                                              | mirL    | 20  | 927   |
| -----GGACTGTGAGGTGACTCTTG-----                                               | mirL    | 23  | 265   |
| -----TTGGACTGTGAGGTGACTCTTGG-----                                            | mirL    | 22  | 158   |
| -----GGACTGTGAGGTGACTCTTGGT-----                                             | mirL    | 24  | 68    |
| -----TTGGACTGTGAGGTGACTCTTGGT-----                                           | mirL    | 23  | 61    |
| -----TGGACTGTGAGGTGACTCTTGGT-----                                            | mirL    | 19  | 47    |
| -----GGACTGTGAGGTGACTCTT-----                                                | mirL    | 25  | 43    |
| -----TTGGACTGTGAGGTGACTCTTGGTG-----                                          | mirL    | 24  | 34    |
| -----GGACTGTGAGGTGACTCTTGGTGT-----                                           | mirL    | 24  | 30    |
| -----TGGACTGTGAGGTGACTCTTGGTG-----                                           | mirL    | 22  | 28    |
| -----TTGGACTGTGAGGTGACTCTTG-----                                             | mirL    | 23  | 20    |
| -----GGACTGTGAGGTGACTCTTGGTG-----                                            | mirL    | 22  | 20    |
| -----TGGACTGTGAGGTGACTCTTGG-----                                             | mirL    | 19  | 17    |
| -----GACTGTGAGGTGACTCTTG-----                                                | mirL    | 18  | 16    |
| -----GGACTGTGAGGTGACTCT-----                                                 | mirL    | 25  | 12    |
| -----TGGACTGTGAGGTGACTCTTGGTGT-----                                          | mirL    | 21  | 12    |
| -----TTGGACTGTGAGGTGACTCTT-----                                              | mirL    | 26  | 12    |
| -----TTGGACTGTGAGGTGACTCTTGGTGT-----                                         | mirL    | 27  | 10    |
| -----TTGGACTGTGAGGTGACTCTTGGTGTG-----                                        | mirL    | 18  | 9     |
| -----CTGTGAGGTGACTCTTGG-----                                                 | mirL    | 18  | 8     |
| -----ACTGTGAGGTGACTCTTG-----                                                 | mirL    | 19  | 6     |
| -----TGGACTGTGAGGTGACTCT-----                                                | mirL    | 21  | 6     |
| -----TGGACTGTGAGGTGACTCTTG-----                                              | mirL    | 23  | 5     |
| -----GACTGTGAGGTGACTCTTGGTGT-----                                            | mirL    | 18  | 4     |
| -----TTTGGACTGTGAGGTGACTCT-----                                              | mirL    | 19  | 4     |
| -----ACTGTGAGGTGACTCTTGG-----                                                | mirL    | 20  | 3     |
| -----GACTGTGAGGTGACTCTTGG-----                                               | mirL    | 26  | 2     |
| -----TGGACTGTGAGGTGACTCTTGGTGT-----                                          | mirL    | 22  | 2     |
| -----ACTGTGAGGTGACTCTTGGTGT-----                                             | mirL    | 24  | 1     |
| -----GACTGTGAGGTGACTCTTGGTGT-----                                            | mirL    | 21  | 1     |
| -----CTGTGAGGTGACTCTTGGTGT-----                                              | mirL    | 21  | 1     |
| -----GACTGTGAGGTGACTCTTGGT-----                                              | mirL    | 23  | 1     |
| -----ACTGTGAGGTGACTCTTGGTGT-----                                             | mirL    | 22  | 1     |
| -----GACTGTGAGGTGACTCTTGGTG-----                                             | mirL    | 22  | 1     |
| -----CTGTGAGGTGACTCTTGGTGT-----                                              | mirL    | 22  | 1     |
| -----TTTTCAGCAAGGTCTCTCTCA-----                                              | mirR    | 21  | 1     |

>mmu-mir-450a-1

```
AAAGAGAGATACTGAGCTGTTTTTGGCGATGTGTTCCCTAATATGTGCTATAATTATATTGGGAACATTTTGCATAAATAGCTTTGTGTCAATACACAGGCAAAAGGTTGG species len reads
----AGAGATACTGAGCTGTTT-----morL 18 2
--AGAGAGATACTGAGCTGT-----morL 18 1
AAAGAGAGATACTGAGCT-----morL 18 1
-----TTTTGGCGATGTGTTCCCTAATAT-----mirL 22 928
-----TTTTGGCGATGTGTTCCCTAATA-----mirL 21 451
-----TTTTGGCGATGTGTTCCCTAATA-----mirL 22 344
-----TTTTGGCGATGTGTTCCCTA-----mirL 19 265
-----TTTTGGCGATGTGTTCCCTAAT-----mirL 20 236
-----TTTTGGCGATGTGTTCCCTAA-----mirL 20 176
-----TTTTGGCGATGTGTTCCCTAA-----mirL 19 110
-----TTTTGGCGATGTGTTCCCTAATAT-----mirL 21 81
-----TTTTGGCGATGTGTTCCCTA-----mirL 18 71
-----TTTTGGCGATGTGTTCCCTAATATG-----mirL 23 65
-----TGGCGATGTGTTCCCTAATA-----mirL 18 64
-----TTGCGATGTGTTCCCTAATA-----mirL 19 53
-----TTTGGCGATGTGTTCCCTAAT-----mirL 19 40
-----TTTGGCGATGTGTTCCCTAATA-----mirL 20 33
-----TTTTGGCGATGTGTTCCCTAAT-----mirL 21 25
-----TTTTGGCGATGTGTTCCCTAA-----mirL 18 20
-----TTTTGGCGATGTGTTCCCT-----mirL 18 20
-----TTTTGGCGATGTGTTCCCTAATATGT-----mirL 24 12
-----TGCGATGTGTTCCCTAATAT-----mirL 19 11
-----GTTTTTGGCGATGTGTTCCCTAATA-----mirL 23 10
-----TTTGGCGATGTGTTCCCTAATATG-----mirL 22 7
-----TTTTTGGCGATGTGTTCCCTAATATG-----mirL 24 6
-----TGTTTTTGGCGATGTGTTCC-----mirL 18 4
-----TTGCGATGTGTTCCCTAATAT-----mirL 20 4
-----TGTTTTTGGCGATGTGTTCCCTAATA-----mirL 24 1
-----TTGCGATGTGTTCCCTAAT-----mirL 18 1
-----TTTTTGGCGATGTGTTCCCTAATAT-----mirL 23 1
-----CTATAATTATATTGGGAACATT-----loop 22 2
-----CATAAATAGCTTTGTGTC-----mirR 18 69
-----TGCATAAATAGCTTTGTG-----mirR 18 2
-----ATAAATAGCTTTGTGTCA-----mirR 18 2
-----CATAAATAGCTTTGTGTCA-----mirR 19 2
-----ACACAGGCAAAAGGTTGG morR 18 2
-----TCAATACACAGGCAAAAG-----morR 18 1
```

>mmu-mir-450a-2

```
CAAACCAAGATGCTGAACTATTTTTGGCGATGTGTTCCCTAATATGTACTATAGAGTATATTGGGGATGCTTGCATTCATGTTCTGCATCCATCATATG species len reads
CAAACCAAGATGCTGAACTAT-----morL 21 5
---ACCAAGATGCTGAACTAT-----morL 18 4
---CCAAGATGCTGAACTATT-----morL 18 1
```

```

--ACCAAGATGCTGAACTATT----- morL 19 1
--AACCAAGATGCTGAACTAT----- morL 19 1
-----AAGATGCTGAACTATTTT----- morL 18 1
-AAACCAAGATGCTGAACT----- morL 18 1
--AACCAAGATGCTGAACTA----- morL 18 1
CAAACCAAGATGCTGAACT----- morL 19 1
-----TTTTGCGATGTGTTCCCTAATAT----- mirL 22 928
-----TTTTGCGATGTGTTCCCTAATA----- mirL 21 451
-----TTTTTGGCGATGTGTTCCCTAATA----- mirL 22 344
-----TTTTTGGCGATGTGTTCCCTA----- mirL 19 265
-----TTTTGCGATGTGTTCCCTAAT----- mirL 20 236
-----TTTTTGGCGATGTGTTCCCTAA----- mirL 20 176
-----TTTTGCGATGTGTTCCCTAA----- mirL 19 110
-----TTTGGCGATGTGTTCCCTAATAT----- mirL 21 81
-----TTTTGCGATGTGTTCCCTA----- mirL 18 71
-----TTTTTGGCGATGTGTTCCCTAATATG----- mirL 23 65
-------TGCGATGTGTTCCCTAATA----- mirL 18 64
-----TTGCGATGTGTTCCCTAATA----- mirL 19 53
-----TTTGGCGATGTGTTCCCTAAT----- mirL 19 40
-----TTTTGCGATGTGTTCCCTAATA----- mirL 20 33
-----TTTTTGGCGATGTGTTCCCTAAT----- mirL 21 25
-----TTTGGCGATGTGTTCCCTAA----- mirL 18 20
-----TTTTTGGCGATGTGTTCCCT----- mirL 18 20
-----TTTTTGGCGATGTGTTCCCTAATATG----- mirL 24 12
-------TGCGATGTGTTCCCTAATAT----- mirL 19 11
-----ATTTTTGGCGATGTGTTCCCTAATA----- mirL 23 10
-----TTTGGCGATGTGTTCCCTAATATG----- mirL 22 7
-----TTTTTGGCGATGTGTTCCCTAATATG----- mirL 24 6
-----TATTTTTGGCGATGTGTTCC----- mirL 18 4
-----TTGCGATGTGTTCCCTAATAT----- mirL 20 4
-----ATTTTTGGCGATGTGTTCC----- mirL 18 2
-----TTTTTGGCGATGTGTTCCCTAATAT----- mirL 23 1
-----TTGCGATGTGTTCCCTAAT----- mirL 18 1
-----ATTGGGGATGCTTTGCATTCAT----- mirR 22 15
-----ATTGGGGATGCTTTGCATTCATG----- mirR 23 12
-----ATTGGGGATGCTTTGCATTCAT----- mirR 21 10
-----TATTGGGGATGCTTTGCA----- mirR 18 2
-----TTGGGGATGCTTTGCATTCAT----- mirR 20 1
-----ATTGGGGATGCTTTGCATTC----- mirR 20 1
-----CATGGTTCTGCATCCATCAT----- morR 20 6
-----GGTTCTGCATCCATCATA----- morR 18 2
-----GTTCTGCATCCATCATATG----- morR 19 2
-----TTCTGCATCCATCATATG----- morR 18 1

```

>mmu-mir-338

TGCACAGGCCGCTCCTCCCCAACAAATATCCTGGTGCTGAGTGGGTGCACAGTGACTCCAGCATCAGTGATTTTGTGTAAGAGGGCAGCTGCCAG species len reads

```
-----CAGGCCGTCCTCCCCAAC----- morL 18 2
---ACAGGCCGTCCTCCCCAA----- morL 18 2
TGCACAGGCCGTCCTCCCC----- morL 19 2
TGCACAGGCCGTCCTCCC----- morL 18 1
--CACAGGCCGTCCTCCCCA----- morL 18 1
-----ACAATATCCTGGTGCTGAGT----- mirL 22 407
-----AACAATATCCTGGTGCTGAGT----- mirL 21 170
-----AACAATATCCTGGTGCTGAGTGG----- mirL 23 71
-----CCAACAATATCCTGGTGCTGAGT----- mirL 23 54
-----ACAATATCCTGGTGCTGAG----- mirL 20 52
-----AACAATATCCTGGTGCTGA----- mirL 19 19
-----AACAATATCCTGGTGCTG----- mirL 18 17
-----ACAATATCCTGGTGCTGAG----- mirL 19 11
-----ACAATATCCTGGTGCTGAGT----- mirL 20 10
-----CCAACAATATCCTGGTGCTGAG----- mirL 22 10
-----CCAACAATATCCTGGTGCTGA----- mirL 21 10
-----CAATATCCTGGTGCTGAGT----- mirL 20 9
-----CCCAACAATATCCTGGTGCTGA----- mirL 22 9
-----ACAATATCCTGGTGCTGAGTGGG----- mirL 23 9
-----CCAACAATATCCTGGTGCTGAGT----- mirL 24 6
-----CAATATCCTGGTGCTGAGT----- mirL 19 6
-----ACAATATCCTGGTGCTGAGT----- mirL 21 5
-----CCCAACAATATCCTGGTGCTG----- mirL 21 4
-----CAACAATATCCTGGTGCTGA----- mirL 20 3
-----ACAATATCCTGGTGCTGA----- mirL 18 2
-----AACAATATCCTGGTGCTGAGTGGG----- mirL 24 2
-----CAACAATATCCTGGTGCTGAG----- mirL 21 2
-----CAACAATATCCTGGTGCT----- mirL 18 1
-----CCCAACAATATCCTGGTGCTGAG----- mirL 23 1
-----TCCAGCATCAGTGATTTTGTGTA----- mirR 23 951
-----TCCAGCATCAGTGATTTTGTG----- mirR 22 668
-----TCCAGCATCAGTGATTTTGT----- mirR 21 159
-----CCAGCATCAGTGATTTTGTG----- mirR 21 76
-----CCAGCATCAGTGATTTTGTGTA----- mirR 22 68
-----TCCAGCATCAGTGATTTTGT----- mirR 20 42
-----TCCAGCATCAGTGATTTTGTGAA----- mirR 24 30
-----CCAGCATCAGTGATTTTGTGAA----- mirR 23 29
-----CAGCATCAGTGATTTTGTG----- mirR 20 24
-----AGCATCAGTGATTTTGTG----- mirR 19 19
-----TCCAGCATCAGTGATTTG----- mirR 19 18
-----TCCAGCATCAGTGATTTTGTGAA----- mirR 25 13
-----AGCATCAGTGATTTTGT----- mirR 18 10
-----CAGCATCAGTGATTTTGT----- mirR 19 7
-----AGCATCAGTGATTTTGTG----- mirR 20 6
-----CCAGCATCAGTGATTTTGT----- mirR 20 4
-----CCAGCATCAGTGATTTGT----- mirR 19 2
```

```

-----AGCATCAGTGATTTTGTGAAG----- mirR 22 1
-----CCAGCATCAGTGATTTTG----- mirR 18 1
-----ACTCCAGCATCAGTGATT----- mirR 18 1
-----CTCCAGCATCAGTGATTTTGT----- mirR 21 1
-----ACTCCAGCATCAGTGATT----- mirR 19 1
-----GACTCCAGCATCAGTGAT----- mirR 18 1
-----GAAGAGGGCAGCTGCCAG morR 18 1

>mmu-mir-499
TCCCTGTGTCTTGGGTGGGCAGCTGTTAAGACTTGCAGTGATGTTTAGCTCCTCTGCATGTGAACATCACAGCAAGTCTGTGCTGCTGCCCCATGCTGCC species len reads
-----TGTCTTGGGTGGGCAGCTG----- morL 19 2
-----CTTGGGTGGGCAGCTGTT----- morL 18 2
TCCCTGTGTCTTGGGTGGGCAG----- morL 22 1
-----GTGTCTTGGGTGGGCAGC----- morL 18 1
-----TGTCTTGGGTGGGCAGCT----- morL 18 1
-----TTAAGACTTGCAGTGATGTTTA----- mirL 22 892
-----TTAAGACTTGCAGTGATGTTT----- mirL 21 753
-----TTAAGACTTGCAGTGATGTTTAG----- mirL 23 188
-----TAAGACTTGCAGTGATGTTTA----- mirL 21 91
-----TTAAGACTTGCAGTGATGTTTAGC----- mirL 24 61
-----TTAAGACTTGCAGTGATGTT----- mirL 20 61
-----TTAAGACTTGCAGTGATG----- mirL 18 48
-----TAAGACTTGCAGTGATGTTT----- mirL 20 38
-----TTAAGACTTGCAGTGATG----- mirL 19 32
-----TAAGACTTGCAGTGATGTTTAG----- mirL 22 32
-----TAAGACTTGCAGTGATGTTTAGC----- mirL 23 31
-----AGACTTGCAGTGATGTTT----- mirL 18 28
-----AGACTTGCAGTGATGTTTA----- mirL 19 18
-----AAGACTTGCAGTGATGTTTAG----- mirL 21 17
-----AGACTTGCAGTGATGTTTAG----- mirL 20 12
-----TAAGACTTGCAGTGATGTTTAGCTC----- mirL 25 12
-----TGTTAAGACTTGCAGTGATGTTTA----- mirL 24 3
-----AAGACTTGCAGTGATGTTT----- mirL 19 3
-----GTTAAGACTTGCAGTGATG----- mirL 19 2
-----TAAGACTTGCAGTGATGTTTAGCTCC----- mirL 26 2
-----TAAGACTTGCAGTGATGTTTAGCT----- mirL 24 2
-----TGTTAAGACTTGCAGTGAT----- mirL 19 1
-----AACATCACAGCAAGTCTGTGCT----- mirR 22 485
-----GAACATCACAGCAAGTCTGTGCT----- mirR 23 82
-----GAACATCACAGCAAGTCTGTGC----- mirR 22 41
-----AACATCACAGCAAGTCTGTGC----- mirR 21 33
-----ACATCACAGCAAGTCTGTGCT----- mirR 21 11
-----ACATCACAGCAAGTCTGTGCTGC----- mirR 23 7
-----AACATCACAGCAAGTCTGTGCTG----- mirR 23 6
-----AACATCACAGCAAGTCTGT----- mirR 19 3
-----ATCACAGCAAGTCTGTGC----- mirR 18 2

```

C:\Documents and Settings\hong\Desktop\Reprogramming-total RNA.txt

```
-----GAACATCACAGCAAGTCTG----- mirR 19 2
-----GAACATCACAGCAAGTCT----- mirR 18 2
-----GAACATCACAGCAAGTCTGTGCTGCTG----- mirR 27 1
-----AACATCACAGCAAGTCTGTGCTGC----- mirR 24 1
-----TGAACATCACAGCAAGTCT----- mirR 19 1
-----ACATCACAGCAAGTCTGT----- mirR 18 1
-----GCTGCTGCCTGCCCCAT----- morR 18 1
-----CTGCTGCCTGCCCCATG----- morR 18 1
-----GCCTGCCCCATGCTGCC morR 18 1
```

>mmu-mir-1899

```
TCAGGGATAAATCTTAGTCAGCGATGGCCGAATCTGCTTCCTCCTGGTTAGAATGAATGTGCTAAGTGGATTCAGATTCTGCTCATTCCGTTGATTACACATAATTCAAAGAATGGTGTATTATGCACCATCCCCTCTGA
TCAGGGATAAATCTTAGT-----
-CAGGGATAAATCTTAGTC-----
-----AGCGATGGCCGAATCTGCTTCC-----
-----AGCGATGGCCGAATCTGCTTCC-----
-----GCGATGGCCGAATCTGCTTCC-----
-----AGCGATGGCCGAATCTGCTT-----
-----AGCGATGGCCGAATCTGCT-----
-----CGATGGCCGAATCTGCTTCC-----
-----AGCGATGGCCGAATCTGCTTCT-----
-----GCGATGGCCGAATCTGCTT-----
-----GATGGCCGAATCTGCTTCC-----
-----AGCGATGGCCGAATCTGCT-----
-----CGATGGCCGAATCTGCTT-----
-----GATGGCCGAATCTGCTTCC-----
-----GCGATGGCCGAATCTGCTTCC-----
-----CAGCGATGGCCGAATCTG-----
-----TCAGCGATGGCCGAATCT-----
-----GCGATGGCCGAATCTGCT-----
-----AGCGATGGCCGAATCTGCTTCTCCTGG-----
-----ATCCCCTCTGA
-----TCCCCTCTGA
-----ATCCCCTCTGA
-----ACCATCCCCTCTGA
-----CCCCTCTGA
-----CCATCCCCTCTGA
```

>mmu-mir-219-1

```
TCCCCGTCCCGGGCCGCGGCTCCTGATGTCCAAACGCAATTCTCGAGTCTCTGGCTCCGGCCGAGAGTTGCGTCTGGACGTCCCGAGCCGCGCCCCAAACCTCG species len reads
-----CCCGGGCCGCGGCTCCTG----- morL 18 17
-----GTCCCGGGCCGCGGCTCC----- morL 18 14
---CCGTCCCGGGCCGCGGCTCC----- morL 20 12
---CGTCCCGGGCCGCGGCTCC----- morL 19 12
-----TCCCGGGCCGCGGCTCCT----- morL 18 8
TCCCCGTCCCGGGCCGCGGCTCC----- morL 23 5
```

```

-----CGTCCCGGGCCGCGGCTC----- morL 18 3
-----TCCCGGGCCGCGGCTCCTG----- morL 19 3
-----CCCGGGCCGCGGCTCCTGA----- morL 19 1
-----CCGGGCCGCGGCTCCTGA----- morL 18 1
---CCGTCCCGGGCCGCGGCTCCT----- morL 21 1
---CGTCCCGGGCCGCGGCTCCT----- morL 20 1
---CCCGTCCCGGGCCGCGGCTCC----- morL 21 1
---CCGTCCCGGGCCGCGGCT----- morL 18 1
-----TGATTGTCCAAACGCAATTCTCG----- mirL 23 886
-----TGATTGTCCAAACGCAATTCT----- mirL 21 172
-----TGATTGTCCAAACGCAATTCTC----- mirL 22 128
-----GATTGTCCAAACGCAATTCTCG----- mirL 22 78
-----TGATTGTCCAAACGCAATTCTCGA----- mirL 24 54
-----TGATTGTCCAAACGCAATT----- mirL 20 14
-----TGATTGTCCAAACGCAATT----- mirL 19 9
-----GATTGTCCAAACGCAATTCT----- mirL 20 9
-----TGATTGTCCAAACGCAAT----- mirL 18 8
-----GATTGTCCAAACGCAATTCTC----- mirL 21 5
-----GATTGTCCAAACGCAATTCTCGA----- mirL 23 5
-----TTGTCCAAACGCAATTCT----- mirL 18 1
-----GATTGTCCAAACGCAATT----- mirL 19 1
-----CTGATTGTCCAAACGCAATTCT----- mirL 22 1
-----GATTGTCCAAACGCAATTCTCGAG----- mirL 24 1
-----CGAGTCTCTGGCTCCGGC----- loop 18 1
-----GAGTCTCTGGCTCCGGCC----- loop 18 1
-----TCTCTGGCTCCGGCCGAGA----- loop 19 1
-----AGTCTCTGGCTCCGGCCGA----- loop 19 1
-----AGAGTTGCGTCTGGACGTCCCG----- mirR 22 1275
-----AGAGTTGCGTCTGGACGTCC----- mirR 20 101
-----AGAGTTGCGTCTGGACGTCCCGA----- mirR 23 48
-----AGAGTTGCGTCTGGACGTCCC----- mirR 21 32
-----AGAGTTGCGTCTGGACGTCCCGAG----- mirR 24 16
-----AGAGTTGCGTCTGGACGTCCCGAGC----- mirR 25 16
-----GAGTTGCGTCTGGACGTCCCG----- mirR 21 11
-----GTTGCGTCTGGACGTCCCG----- mirR 19 8
-----GTTGCGTCTGGACGTCCC----- mirR 18 6
-----AGTTGCGTCTGGACGTCCCG----- mirR 20 5
-----GAGTTGCGTCTGGACGT----- mirR 18 3
-----AGAGTTGCGTCTGGACGT----- mirR 18 2
-----CGAGAGTTGCGTCTGGACG----- mirR 19 2
-----AGTTGCGTCTGGACGTCCCGAGC----- mirR 23 1
-----CCGAGAGTTGCGTCTGGAC----- mirR 19 1
-----AGCCGCCGCCCCCAAACCTCG morR 21 13
-----GAGCCGCCGCCCCCAAAC----- morR 18 6
-----GCCGCCGCCCCCAAACCT-- morR 18 1
-----CCGCCGCCCCCAAACCTC- morR 18 1

```

>mmu-mir-1941

| Sequence                                                                                             | species | len | reads |
|------------------------------------------------------------------------------------------------------|---------|-----|-------|
| GGGGAAAGCCAGCAGGGTGGGAGGGAGATGCTGGTACAGAGGCTTGGGGTTTTGAGGGCATCTTAGCAGTATCTCCCATCCACCCACCTGGGCAGAAGTC | morL    | 18  | 11    |
| ---GAAAGCCAGCAGGGTGGG---                                                                             | morL    | 19  | 7     |
| --GGAAAGCCAGCAGGGTGGG--                                                                              | morL    | 20  | 7     |
| ---GAAAGCCAGCAGGGTGGGAG---                                                                           | morL    | 19  | 1     |
| ---GAAAGCCAGCAGGGTGGGA---                                                                            | morL    | 18  | 1     |
| GGGGAAAGCCAGCAGGGT---                                                                                | morL    | 18  | 1     |
| ---AAGCCAGCAGGGTGGGAG---                                                                             | mirL    | 23  | 36    |
| -----GAGGGAGATGCTGGTACAGAGGC-----                                                                    | mirL    | 22  | 15    |
| -----AGGGAGATGCTGGTACAGAGGC-----                                                                     | mirL    | 22  | 13    |
| -----GAGGGAGATGCTGGTACAGAGG-----                                                                     | mirL    | 24  | 13    |
| -----AGGGAGATGCTGGTACAGAGGCTT-----                                                                   | mirL    | 18  | 9     |
| -----AGGGAGATGCTGGTACAG-----                                                                         | mirL    | 25  | 7     |
| -----AGGGAGATGCTGGTACAGAGGCTTG-----                                                                  | mirL    | 23  | 7     |
| -----AGGGAGATGCTGGTACAGAGGCT-----                                                                    | mirL    | 20  | 7     |
| -----AGGGAGATGCTGGTACAGAGGCTTGG-----                                                                 | mirL    | 26  | 6     |
| -----GAGGGAGATGCTGGTACAGAGGCTT-----                                                                  | mirL    | 25  | 6     |
| -----GAGGGAGATGCTGGTACAGAGGCT-----                                                                   | mirL    | 24  | 3     |
| -----GAGGGAGATGCTGGTACAGAG-----                                                                      | mirL    | 21  | 2     |
| -----GAGGGAGATGCTGGTACAGAGGCTTG-----                                                                 | mirL    | 26  | 2     |
| -----GGGAGGGAGATGCTGGTAC-----                                                                        | mirL    | 19  | 1     |
| -----GGGAGGGAGATGCTGGTA-----                                                                         | mirL    | 18  | 1     |
| -----GGAGGGAGATGCTGGTAC-----                                                                         | mirL    | 18  | 1     |
| -----GAGGGAGATGCTGGTACAGA-----                                                                       | mirL    | 20  | 1     |
| -----CATCTTAGCAGTATCTCCCAT-----                                                                      | mirR    | 21  | 1323  |
| -----CATCTTAGCAGTATCTCCCATC-----                                                                     | mirR    | 22  | 467   |
| -----CATCTTAGCAGTATCTCCCA-----                                                                       | mirR    | 20  | 385   |
| -----CATCTTAGCAGTATCTCCCATCC-----                                                                    | mirR    | 23  | 248   |
| -----ATCTTAGCAGTATCTCCCATCC-----                                                                     | mirR    | 22  | 123   |
| -----CATCTTAGCAGTATCTCCC-----                                                                        | mirR    | 19  | 79    |
| -----CATCTTAGCAGTATCTCC-----                                                                         | mirR    | 18  | 53    |
| -----CTTAGCAGTATCTCCCAT-----                                                                         | mirR    | 18  | 35    |
| -----CATCTTAGCAGTATCTCCCATCCA-----                                                                   | mirR    | 24  | 24    |
| -----ATCTTAGCAGTATCTCCCAT-----                                                                       | mirR    | 20  | 20    |
| -----ATCTTAGCAGTATCTCCCA-----                                                                        | mirR    | 19  | 19    |
| -----ATCTTAGCAGTATCTCCC-----                                                                         | mirR    | 18  | 16    |
| -----TCTTAGCAGTATCTCCCAT-----                                                                        | mirR    | 19  | 13    |
| -----ATCTTAGCAGTATCTCCCATCCAC-----                                                                   | mirR    | 24  | 7     |
| -----ATCTTAGCAGTATCTCCCATCCA-----                                                                    | mirR    | 23  | 7     |
| -----GCATCTTAGCAGTATCTCCCAT-----                                                                     | mirR    | 22  | 4     |
| -----ATCTTAGCAGTATCTCCCATC-----                                                                      | mirR    | 21  | 3     |
| -----GCATCTTAGCAGTATCTCCC-----                                                                       | mirR    | 20  | 2     |
| -----GCATCTTAGCAGTATCTCC-----                                                                        | mirR    | 19  | 2     |
| -----CTTAGCAGTATCTCCCATCCACCCAC-----                                                                 | mirR    | 26  | 1     |



```

-----GCATCTTAGCAGTATCTC----- mirR 18 1
-----TCTTAGCAGTATCTCCA----- mirR 18 1
-----GGGCATCTTAGCAGTATC----- mirR 18 1
-----CCCACCTGGGCAGAAGTC morR 18 2
-----CACCCACCTGGGCAGAAG-- morR 18 2
-----CATCCACCCACCTGGGCAG---- morR 19 1
-----CACCCACCTGGGCAGAAGT- morR 19 1

```

>mmu-mir-153

| Species | len | reads |
|---------|-----|-------|
| morL    | 19  | 3     |
| morL    | 18  | 2     |
| morL    | 18  | 1     |
| morL    | 20  | 1     |
| morL    | 22  | 1     |
| mirL    | 23  | 13    |
| mirL    | 22  | 7     |
| mirL    | 24  | 4     |
| mirL    | 21  | 3     |
| mirL    | 21  | 2     |
| mirL    | 18  | 1     |
| mirL    | 24  | 1     |
| mirL    | 20  | 1     |
| mirL    | 25  | 1     |
| loop    | 18  | 2     |
| loop    | 19  | 1     |
| mirR    | 22  | 2236  |
| mirR    | 24  | 332   |
| mirR    | 25  | 72    |
| mirR    | 21  | 45    |
| mirR    | 20  | 30    |
| mirR    | 23  | 27    |
| mirR    | 21  | 25    |
| mirR    | 19  | 18    |
| mirR    | 23  | 16    |
| mirR    | 23  | 7     |
| mirR    | 19  | 5     |
| mirR    | 26  | 5     |
| mirR    | 22  | 3     |
| mirR    | 20  | 2     |
| mirR    | 18  | 2     |
| morR    | 18  | 13    |
| morR    | 18  | 1     |
| morR    | 20  | 1     |

>mmu-mir-1843

|                                                                                     | species | len | reads |
|-------------------------------------------------------------------------------------|---------|-----|-------|
| AATATGGAGGTCTCTGTCTGACTTAGAATAGCTGGCTGAGTCTGATCGTTCACCTCCATACAACCTTAGACTCTCACTCTACT | mirL    | 23  | 307   |
| --TATGGAGGTCTCTGTCTGACTTA-----                                                      | mirL    | 22  | 232   |
| ---ATGGAGGTCTCTGTCTGACTTA-----                                                      | mirL    | 21  | 204   |
| --TATGGAGGTCTCTGTCTGACT-----                                                        | mirL    | 21  | 94    |
| ---ATGGAGGTCTCTGTCTGACTTT-----                                                      | mirL    | 22  | 84    |
| --TATGGAGGTCTCTGTCTGACTT-----                                                       | mirL    | 20  | 59    |
| ---ATGGAGGTCTCTGTCTGACT-----                                                        | mirL    | 22  | 45    |
| -ATATGGAGGTCTCTGTCTGACT-----                                                        | mirL    | 23  | 42    |
| ---ATGGAGGTCTCTGTCTGACTTAG-----                                                     | mirL    | 19  | 33    |
| --TATGGAGGTCTCTGTCTGA-----                                                          | mirL    | 24  | 32    |
| --TATGGAGGTCTCTGTCTGACTTAG-----                                                     | mirL    | 21  | 11    |
| ---TGGAGGTCTCTGTCTGACTTA-----                                                       | mirL    | 20  | 7     |
| -ATATGGAGGTCTCTGTCTGA-----                                                          | mirL    | 21  | 7     |
| -ATATGGAGGTCTCTGTCTGAC-----                                                         | mirL    | 24  | 6     |
| -ATATGGAGGTCTCTGTCTGACTTA-----                                                      | mirL    | 19  | 6     |
| ---ATGGAGGTCTCTGTCTGACT-----                                                        | mirL    | 23  | 5     |
| -ATATGGAGGTCTCTGTCTGACTTT-----                                                      | mirL    | 18  | 4     |
| ---ATGGAGGTCTCTGTCTGA-----                                                          | mirL    | 20  | 4     |
| --TATGGAGGTCTCTGTCTGAC-----                                                         | mirL    | 25  | 3     |
| ---ATGGAGGTCTCTGTCTGACTTAGAA-----                                                   | mirL    | 25  | 3     |
| --TATGGAGGTCTCTGTCTGACTTAGA-----                                                    | mirL    | 20  | 2     |
| ---GGAGGTCTCTGTCTGACTTA-----                                                        | mirL    | 22  | 2     |
| ---TGGAGGTCTCTGTCTGACTTAG-----                                                      | mirL    | 22  | 2     |
| AATATGGAGGTCTCTGTCTGACT-----                                                        | mirL    | 18  | 1     |
| -ATATGGAGGTCTCTGTCT-----                                                            | mirL    | 18  | 1     |
| ---TGGAGGTCTCTGTCTGAC-----                                                          | mirL    | 20  | 1     |
| ---TGGAGGTCTCTGTCTGACTT-----                                                        | mirL    | 18  | 1     |
| ---GGAGGTCTCTGTCTGACT-----                                                          | loop    | 19  | 1     |
| -----TTAGAATAGCTGGCTGAGT-----                                                       | mirR    | 22  | 693   |
| -----TCTGATCGTTCACCTCCATACA-----                                                    | mirR    | 21  | 350   |
| -----TCTGATCGTTCACCTCCATAC-----                                                     | mirR    | 23  | 133   |
| -----GTCTGATCGTTCACCTCCATACA-----                                                   | mirR    | 23  | 113   |
| -----TCTGATCGTTCACCTCCATAAA-----                                                    | mirR    | 24  | 46    |
| -----AGTCTGATCGTTCACCTCCATACA-----                                                  | mirR    | 21  | 42    |
| -----CTGATCGTTCACCTCCATACA-----                                                     | mirR    | 22  | 36    |
| -----GTCTGATCGTTCACCTCCATAC-----                                                    | mirR    | 19  | 31    |
| -----TCTGATCGTTCACCTCCAT-----                                                       | mirR    | 22  | 30    |
| -----AGTCTGATCGTTCACCTCCATA-----                                                    | mirR    | 20  | 30    |
| -----TCTGATCGTTCACCTCCATA-----                                                      | mirR    | 21  | 18    |
| -----GTCTGATCGTTCACCTCCATA-----                                                     | mirR    | 23  | 17    |
| -----AGTCTGATCGTTCACCTCCATAC-----                                                   | mirR    | 18  | 16    |
| -----TCTGATCGTTCACCTCCA-----                                                        | mirR    | 22  | 13    |
| -----CTGATCGTTCACCTCCATACAA-----                                                    | mirR    | 23  | 12    |
| -----GATCGTTCACCTCCATACAACCT-----                                                   | mirR    | 20  | 11    |
| -----CTGATCGTTCACCTCCATAC-----                                                      | mirR    | 24  | 10    |
| -----TCTGATCGTTCACCTCCATACAAC-----                                                  |         |     |       |

```

-----GTCTGATCGTTCACCTCCATACAA----- mirR 24 10
-----AGTCTGATCGTTCACCTCCAT----- mirR 21 6
-----CTGATCGTTCACCTCCAT----- mirR 18 5
-----GTCTGATCGTTCACCTCCAT----- mirR 20 5
-----AGTCTGATCGTTCACCTCCA----- mirR 20 4
-----GAGTCTGATCGTTCACCTCCATAACA----- mirR 25 3
-----CTGATCGTTCACCTCCATAACAAC----- mirR 23 3
-----AGTCTGATCGTTCACCTC----- mirR 18 3
-----GAGTCTGATCGTTCACCTCCATAACAACC----- mirR 28 3
-----GTCTGATCGTTCACCTCCATAACAAC----- mirR 25 3
-----GATCGTTCACCTCCATAACAACC----- mirR 22 1
-----TGATCGTTCACCTCCATAACAAC----- mirR 22 1
-----GAGTCTGATCGTTCACCTCCATAAC----- mirR 24 1
-----CTGATCGTTCACCTCCATA----- mirR 19 1
-----CTGATCGTTCACCTCCATAACAACC----- mirR 24 1
-----GAGTCTGATCGTTCACCTCCATA----- mirR 23 1
-----AGTCTGATCGTTCACCTCCATACAA----- mirR 25 1
-----GTCTGATCGTTCACCTCCA----- mirR 19 1
-----GATCGTTCACCTCCATAAC----- mirR 18 1
-----CCTTAGACTCTCACTCTA----- morR 18 1
-----CTTAGACTCTCACTCTACT morR 19 1
-----ACCTTAGACTCTCACTCTAC morR 20 1
-----ACAACCTTAGACTCTCACTC--- morR 20 1
-----ACCTTAGACTCTCACTCT--- morR 18 1

```

>mmu-mir-1963

```

GCAGGTCTGGATAGTAGGGCTGGGACGAGATCATGAGGCCTTCTGGCCACTGGGAAGGACTCGGCCCTTGTCGCCGAGGTGATGGGTGTCTTTAGTGACGAGGATGTGAAGCAGATCTGAAGA species len r
-----GTCTGGATAGTAGGGCTG----- morL 18 1
GCAGGTCTGGATAGTAGG----- morL 18 1
-----TGGGACGAGATCATGAGGCCTTC----- mirL 23 2144
-----GGGACGAGATCATGAGGCCTTC----- mirL 22 278
-----TGGGACGAGATCATGAGGCCTT----- mirL 22 124
-----GGACGAGATCATGAGGCCTTC----- mirL 21 93
-----TGGGACGAGATCATGAGGCCT----- mirL 21 36
-----GACGAGATCATGAGGCCTTC----- mirL 20 26
-----TGGGACGAGATCATGAGG----- mirL 18 15
-----TGGGACGAGATCATGAGGC----- mirL 19 15
-----TGGGACGAGATCATGAGGCCTTCC----- mirL 24 13
-----TGGGACGAGATCATGAGGCC----- mirL 20 10
-----GGGACGAGATCATGAGGCCTT----- mirL 21 9
-----CTGGGACGAGATCATGAGGCCTTC----- mirL 24 8
-----GGACGAGATCATGAGGCCTT----- mirL 20 6
-----GGACGAGATCATGAGGCCT----- mirL 19 6
-----GGGACGAGATCATGAGGCCTTCC----- mirL 23 6
-----GGGACGAGATCATGAGGC----- mirL 18 5
-----GACGAGATCATGAGGCCT----- mirL 18 2

```

```

-----CTGGGACGAGATCATGAGGCCT----- mirL 23 1
-----GGGACGAGATCATGAGGCCT----- mirL 20 1
-----CTGGGACGAGATCATGAGG----- mirL 19 1
-----GGGTGTCTTTTAGTGACGAG----- mirR 19 7
-----ATGGGTGTCTTTAGTGAC----- mirR 18 2
-----GGTGTCTTTAGTGACGAG----- mirR 18 1
-----GGGTGTCTTTAGTGACGA----- mirR 18 1
-----GTGTCTTTAGTGACGAGGA----- mirR 19 1
-----ATGTGAAGCAGATCCTGA--- morR 18 5
-----GATGTGAAGCAGATCCTG--- morR 18 1
-----TGTGAAGCAGATCCTGAA-- morR 18 1
-----GTGAAGCAGATCCTGAAGA morR 19 1

>mmu-mir-1950
CCATGCCCGCCAAATGCTTTTCTGCATCTAAGGATATGGTCATTTAATTGTTTTTTCCATGATCATCTCCTTAAATGCAGAAAAAGCAGCCAGTTTTCTGCTTCATTTTCCTATTTTAA species len read
---TGCCCGCCAAATGCTTT----- morL 18 1
---CGGCCAAATGCTTTTCT----- morL 18 1
---GCCCGCCAAATGCTTTTC----- morL 20 1
CCATGCCCGCCAAATGCT----- morL 19 1
-----TCTGCATCTAAGGATATGGTCA----- mirL 22 2062
-----TCTGCATCTAAGGATATGGTC----- mirL 21 409
-----TCTGCATCTAAGGATATG----- mirL 18 85
-----CTGCATCTAAGGATATGGTCA----- mirL 21 59
-----TCTGCATCTAAGGATATGGT----- mirL 20 45
-----GCATCTAAGGATATGGTCA----- mirL 19 32
-----TCTGCATCTAAGGATATGG----- mirL 19 22
-----TGCATCTAAGGATATGGTCA----- mirL 20 21
-----TGCATCTAAGGATATGGTC----- mirL 19 16
-----CTGCATCTAAGGATATGGTC----- mirL 20 5
-----CTGCATCTAAGGATATGG----- mirL 18 5
-----GCATCTAAGGATATGGTC----- mirL 18 4
-----TCTGCATCTAAGGATATGGTCAT----- mirL 23 3
-----TTCTGCATCTAAGGATATGGTCA----- mirL 23 1
-----TTTCTGCATCTAAGGATAT----- mirL 19 1
-----TGCATCTAAGGATATGGTCATT----- mirL 22 1
-----GCATCTAAGGATATGGTCATTT----- mirL 22 1
-----TTTTCTGCATCTAAGGATA----- mirL 19 1
-----TTCTGCATCTAAGGATATGGTC----- mirL 22 1
-----AAGCAGCCAGTTTTCTGC----- mirR 18 15
-----AGCAGCCAGTTTTCTGCT----- mirR 18 5
-----AAAAAGCAGCCAGTTTTC----- mirR 18 3
-----GCAGCCAGTTTTCTGCTTC----- mirR 19 1
-----CTTCATTTTCCTATTTT----- morR 18 2
-----TGCTTCATTTTCCTATTT----- morR 18 1
-----CTTCATTTTCCTATTTTAA morR 19 1

```

>mmu-mir-6691

| Sequence                                                                                                                | species | len | read |
|-------------------------------------------------------------------------------------------------------------------------|---------|-----|------|
| TGCCCCCATGTTTGTGCATGTGCGTATAGTTGTGTGCATGTATATGTGTGTATATGAATATACATATACATACACACCCATATATACACGCATTCATATGAACACATCAACACACACGC | morL    | 19  | 110  |
| -----TGTTTGTGCATGTGCGTAT-----                                                                                           | morL    | 18  | 26   |
| -----GTTTGTGCATGTGCGTAT-----                                                                                            | morL    | 20  | 7    |
| -----ATGTTTGTGCATGTGCGTAT-----                                                                                          | morL    | 20  | 3    |
| -----TGTTTGTGCATGTGCGTATA-----                                                                                          | morL    | 26  | 2    |
| -----CCCCCATGTTTGTGCATGTGCGTAT-----                                                                                     | morL    | 24  | 2    |
| -----CCCCATGTTTGTGCATGTGCGTAT-----                                                                                      | morL    | 21  | 2    |
| -----ATGTTTGTGCATGTGCGTATA-----                                                                                         | morL    | 23  | 2    |
| -----CCCATGTTTGTGCATGTGCGTAT-----                                                                                       | morL    | 19  | 1    |
| -----GTTTGTGCATGTGCGTATA-----                                                                                           | morL    | 18  | 1    |
| -----TTGTGCATGTGCGTATAG-----                                                                                            | morL    | 19  | 1    |
| -----ATGTTTGTGCATGTGCGTAT-----                                                                                          | morL    | 28  | 1    |
| TGCCCCCATGTTTGTGCATGTGCGTAT-----                                                                                        | mirL    | 22  | 1602 |
| -----AGTTGTGTGTGCATGTATATGT-----                                                                                        | mirL    | 24  | 179  |
| -----AGTTGTGTGTGCATGTATATGTGT-----                                                                                      | mirL    | 23  | 52   |
| -----GTTGTGTGTGCATGTATATGTGT-----                                                                                       | mirL    | 21  | 52   |
| -----GTTGTGTGTGCATGTATATGT-----                                                                                         | mirL    | 21  | 27   |
| -----AGTTGTGTGTGCATGTATATG-----                                                                                         | mirL    | 20  | 24   |
| -----AGTTGTGTGTGCATGTATAT-----                                                                                          | mirL    | 23  | 21   |
| -----AGTTGTGTGTGCATGTATATGTG-----                                                                                       | mirL    | 22  | 15   |
| -----GTTGTGTGTGCATGTATATGTG-----                                                                                        | mirL    | 19  | 10   |
| -----AGTTGTGTGTGCATGTATA-----                                                                                           | mirL    | 23  | 5    |
| -----TAGTTGTGTGTGCATGTATATGT-----                                                                                       | mirL    | 18  | 4    |
| -----AGTTGTGTGTGCATGTAT-----                                                                                            | mirL    | 18  | 1    |
| -----TAGTTGTGTGTGCATGTA-----                                                                                            | mirL    | 18  | 1    |
| -----GTTGTGTGTGCATGTATATGTGTGT-----                                                                                     | mirL    | 25  | 1    |
| -----GTTGTGTGTGCATGTATATG-----                                                                                          | mirL    | 20  | 1    |
| -----TAGTTGTGTGTGCATGTATAT-----                                                                                         | mirL    | 21  | 1    |
| -----ATATACATACACACCCATATAT-----                                                                                        | mirR    | 22  | 485  |
| -----TATACATACACACCCATATAT-----                                                                                         | mirR    | 21  | 68   |
| -----CATATACATACACACCCATATAT-----                                                                                       | mirR    | 23  | 42   |
| -----ATATACATACACACCCATATATA-----                                                                                       | mirR    | 23  | 17   |
| -----ATACATACACACCCATATAT-----                                                                                          | mirR    | 20  | 4    |
| -----CATATACATACACACCCATATATA-----                                                                                      | mirR    | 24  | 4    |
| -----TATACATACACACCCATATATA-----                                                                                        | mirR    | 22  | 3    |
| -----ACACGCATTCATATGAACACA-----                                                                                         | morR    | 21  | 3    |
| -----ACACGCATTCATATGAACACATCAACACACA-----                                                                               | morR    | 31  | 2    |
| -----ACACGCATTCATATGAACA-----                                                                                           | morR    | 19  | 1    |
| -----ACACGCATTCATATGAACACATCAACACACACGC-----                                                                            | morR    | 34  | 1    |
| -----ATACACGCATTCATATGAAC-----                                                                                          | morR    | 20  | 1    |
| -----ACACGCATTCATATGAACACAT-----                                                                                        | morR    | 22  | 1    |
| -----ACACGCATTCATATGAAC-----                                                                                            | morR    | 18  | 1    |
| -----ACACGCATTCATATGAACACATCAACACACAC-----                                                                              | morR    | 32  | 1    |

>mmu-mir-759

```

TAAATTAATGCCTAAACTGGCAGAGTGCAAACAATTTTACTCAGATCTAAATGTTTGCACTGGCTGTTTAAACATTTAATTTGTTCCAATGGAGGTAGCAGCACAGACTAAGCATGCTAATTAACCTCGG species
TAAATTAATGCCTAAACT-----morL 19
-----TTAATGCCTAAACTGGC-----morL 18
-----GCAGAGTGCAAACAATTTTGA-----mirL 21
-----GCAGAGTGCAAACAATTTTGA-----mirL 20
-----GCAGAGTGCAAACAATTTTGAC-----mirL 22
-----GAGTGCAAACAATTTTGA-----mirL 18
-----AGAGTGCAAACAATTTTGA-----mirL 19
-----CAGAGTGCAAACAATTTTGA-----mirL 20
-----GCAGAGTGCAAACAATTT-----mirL 18
-----GCAGAGTGCAAACAATTTT-----mirL 19
-----GAGTGCAAACAATTTTGAC-----mirL 19
-----GCAGAGTGCAAACAATTTTGACT-----mirL 23
-----GGCAGAGTGCAAACAATT-----mirL 18
-----GGCAGAGTGCAAACAATTTTGA-----mirL 22
-----AGAGTGCAAACAATTTTGA-----mirL 18
-----GGCAGAGTGCAAACAATTTTGAC-----mirL 23
-----CTGGCAGAGTGCAAACAA-----mirL 18
-----TAGCAGCACAGACTAAGCA-----mirR 19
-----TAGCAGCACAGACTAAGC-----mirR 18
-----AGCAGCACAGACTAAGCA-----mirR 18
-----TAGCAGCACAGACTAAGCATGC-----mirR 22
-----TAGCAGCACAGACTAAGCATG-----mirR 21
-----AGGTAGCAGCACAGACTA-----mirR 18
-----CAGCACAGACTAAGCATG-----mirR 18
-----TAGCAGCACAGACTAAGCAT-----mirR 20
-----CATGCTAATTAACCTCGG-----morR 18

```

>mmu-mir-2145-1

```

GGAATCATGTCTATAGTCATACCACCTGAACATGCTTGATCCCATCTGATCTCAGAAGCCGAGCAGGGTCGGCCTGGTTAATGC species len reads
GGAATCATGTCTATAGTC-----morL 18 2
-GAATCATGTCTATAGTCA-----morL 18 1
---ATCATGTCTATAGTCATA-----morL 18 1
-----ATACCACCTGAACATGCT-----mirL 19 107
-----TACCACCTGAACATGCT-----mirL 18 48
-----ATACCACCTGAACATGC-----mirL 18 38
-----ACCACCTGAACATGCTT-----mirL 18 33
-----CATACCACCTGAACATGC-----mirL 19 25
-----TACCACCTGAACATGCTT-----mirL 19 25
-----CATACCACCTGAACATGCT-----mirL 20 10
-----ATACCACCTGAACATGCTT-----mirL 20 7
-----ACCACCTGAACATGCTTG-----mirL 19 6
-----GTCATACCACCTGAACA-----mirL 18 6
-----TACCACCTGAACATGCTTG-----mirL 20 5
-----CATACCACCTGAACATG-----mirL 18 5
-----CCACCTGAACATGCTTG-----mirL 18 5

```

```

-----CATACCACCTGAACATGCTT----- mirL 21 4
-----ACCACCTGAACATGCTTGA----- mirL 20 4
-----TCATACCACCTGAACAT----- mirL 18 3
-----ATACCACCTGAACATGCTTGA----- mirL 22 2
-----TACCACCTGAACATGCTTGAT----- mirL 22 1
-----CCACCTGAACATGCTTGATC----- mirL 21 1
-----TACCACCTGAACATGCTTGATC----- mirL 23 1
-----CCACCTGAACATGCTTGAT----- mirL 20 1
-----ACCACCTGAACATGCTTGAT----- mirL 21 1
-----GTCATACCACCTGAACAT----- mirL 19 1
-----TCATACCACCTGAACATGCT----- mirL 21 1
-----CATACCACCTGAACATGCTG----- mirL 22 1
-----ATCCCATCTGATCTCAGAAG----- loop 20 1
-----TGATCCCATCTGATCTCAGAAG----- loop 22 1
-----AGCAGGGTCGGGCCTGGTT----- mirR 19 2090
-----AGCAGGGTCGGGCCTGGT----- mirR 18 141
-----GCAGGGTCGGGCCTGGTT----- mirR 18 35
-----AGCAGGGTCGGGCCTGGTTA----- mirR 20 22
-----AGCAGGGTCGGGCCTGGTTAATG----- mirR 23 13
-----GAGCAGGGTCGGGCCTGGTT----- mirR 20 7
-----GCAGGGTCGGGCCTGGTTA----- mirR 19 5
-----CAGGGTCGGGCCTGGTTA----- mirR 18 5
-----GAGCAGGGTCGGGCCTGGT----- mirR 19 5
-----GAGCAGGGTCGGGCCTGG----- mirR 18 4
-----CCGAGCAGGGTCGGGCCTGGTT----- mirR 22 3
-----CGAGCAGGGTCGGGCCTGG----- mirR 19 3
-----AGGGTCGGGCCTGGTTAATG----- mirR 20 2
-----AGCAGGGTCGGGCCTGGTTAA----- mirR 21 2
-----CGAGCAGGGTCGGGCCTGGTT----- mirR 21 2
-----GCAGGGTCGGGCCTGGTTAATG----- mirR 22 2
-----CAGGGTCGGGCCTGGTTAAT----- mirR 20 2
-----AGCAGGGTCGGGCCTGGTTAATGC----- mirR 24 1
-----GCAGGGTCGGGCCTGGTTAATGC----- mirR 23 1
-----CGAGCAGGGTCGGGCCTGGT----- mirR 20 1
-----GCAGGGTCGGGCCTGGTTAA----- mirR 20 1
-----CCGAGCAGGGTCGGGCCTGGT----- mirR 21 1
-----CAGGGTCGGGCCTGGTTAATG----- mirR 21 1
-----CCGAGCAGGGTCGGGCCTGG----- mirR 20 1
-----AGGGTCGGGCCTGGTTAATGC----- mirR 21 1

>mmu-mir-297a-3
CCCCAGTGTATGTGCTGTGTATATGTATGTGTGCATGTGCATGTGTGTATATGAATATACATATACACACATACCATACAAACATGCACACAAACACAGAAAATTGACACTCAT species len r
--CCCAGTGTATGTGCTGTGTGT----- morL 22 29
-----GTGTATGTGCTGTGTGTAT----- morL 20 11
-----CCAGTGTATGTGCTGTGTGTAT----- morL 23 11
-----CAGTGTATGTGCTGTGTGT----- morL 20 6

```

|                                         |      |    |      |
|-----------------------------------------|------|----|------|
| ---CCAGTGTATGTGCCTGTGTGT---             | morL | 21 | 6    |
| ----AGTGTATGTGCCTGTGTGTAT----           | morL | 21 | 6    |
| -CCCCAGTGTATGTGCCTGTGTGT-               | morL | 23 | 5    |
| --CCCAGTGTATGTGCCTGTGTGTAT--            | morL | 24 | 3    |
| ---CCAGTGTATGTGCCTGTGTGTA---            | morL | 22 | 2    |
| ----CAGTGTATGTGCCTGTGTGTAT----          | morL | 22 | 2    |
| ----AGTGTATGTGCCTGTGTGT---              | morL | 19 | 2    |
| ----GTGTATGTGCCTGTGTGT---               | morL | 18 | 2    |
| CCCCCAGTGTATGTGCCTGTGTGTATA--           | morL | 27 | 2    |
| -CCCCAGTGTATGTGCCTGTGTGTAT-             | morL | 25 | 2    |
| ----AGTGTATGTGCCTGTGTGT---              | morL | 18 | 1    |
| ---CCAGTGTATGTGCCTGTGTGT---             | morL | 20 | 1    |
| -----ATGTATGTGTGCATGTGCATGT-----        | mirL | 22 | 2164 |
| -----ATGTATGTGTGCATGTGCATG-----         | mirL | 21 | 141  |
| -----ATGTATGTGTGCATGTGCATGTG-----       | mirL | 23 | 52   |
| -----ATGTATGTGTGCATGTGCATGTGT-----      | mirL | 24 | 45   |
| -----ATGTATGTGTGCATGTGCAT-----          | mirL | 20 | 38   |
| -----GTATGTGTGCATGTGCATGT-----          | mirL | 20 | 10   |
| -----TGTATGTGTGCATGTGCATGT-----         | mirL | 21 | 9    |
| -----ATGTATGTGTGCATGTGCA-----           | mirL | 19 | 9    |
| -----GTATGTGTGCATGTGCATG-----           | mirL | 19 | 4    |
| -----ATGTATGTGTGCATGTGC-----            | mirL | 18 | 4    |
| -----TATGTATGTGTGCATGTGCAT-----         | mirL | 21 | 3    |
| -----TGTATGTGTGCATGTGCATG-----          | mirL | 20 | 2    |
| -----TATGTATGTGTGCATGTGCATG-----        | mirL | 22 | 2    |
| -----ATATGTATGTGTGCATGTGC-----          | mirL | 20 | 2    |
| -----ATATGTATGTGTGCATGTG-----           | mirL | 19 | 1    |
| -----ATATGTATGTGTGCATGTGCATGT-----      | mirL | 24 | 1    |
| -----TATATGTATGTGTGCATGTG-----          | mirL | 20 | 1    |
| -----TGTATGTGTGCATGTGCATGTGT-----       | mirL | 23 | 1    |
| -----TGTATGTGTGCATGTGCATGTG-----        | mirL | 22 | 1    |
| -----TATGTATGTGTGCATGTGCATGT-----       | mirL | 23 | 1    |
| -----GTATGTGTGCATGTGCAT-----            | mirL | 18 | 1    |
| -----TATATGTATGTGTGCATGTGC-----         | mirL | 21 | 1    |
| -----ATATGTATGTGTGCATGTGCAT-----        | mirL | 22 | 1    |
| -----GTATGTGTGCATGTGCATGTG-----         | mirL | 21 | 1    |
| -----ATATGTATGTGTGCATGTGCATGTGT-----    | mirL | 26 | 1    |
| -----CAAACATGCACACAAACA-----            | mirR | 18 | 15   |
| -----CAAACATGCACACAAACACAGAAAATTGA----- | mirR | 31 | 8    |
| -----ACAAACATGCACACAAACACA-----         | mirR | 21 | 6    |
| -----AACATGCACACAAACACA-----            | mirR | 18 | 4    |
| -----ACAAACATGCACACAAACAC-----          | mirR | 20 | 4    |
| -----CAAACATGCACACAAACAC-----           | mirR | 19 | 4    |
| -----ACAAACATGCACACAAACA-----           | mirR | 19 | 3    |
| -----AAACATGCACACAAACAC-----            | mirR | 18 | 3    |
| -----ACAAACATGCACACAAAC-----            | mirR | 18 | 3    |



```

-----AAACATGCACACAAACACA----- mirR 19 3
-----ATACAAACATGCACACAA----- mirR 18 2
-----ATACAAACATGCACACAAAC----- mirR 20 1
-----AAACATGCACACAAACACACAG----- mirR 22 1
-----AACATGCACACAAACACACAGA----- mirR 22 1
-----CAAACATGCACACAAACACA----- mirR 20 1
-----TACAAACATGCACACAAA----- mirR 18 1
-----ATACAAACATGCACACAAACA----- mirR 21 1
-----ACACACAGAAAATTGACTCAT morR 23 1

```

>mmu-mir-1964

| ACATCTTAACCTTTCTTGCGAAGCTGGAGCACAAAAGCCGGTGCCGGTGTGATGCCTACACCGACTTCTGGGCTCCGGCTTTGGAAGGAAGGAGGTAGCCTCG | species | len | reads |
|---------------------------------------------------------------------------------------------------------|---------|-----|-------|
| ACATCTTAACCTTTCTTG                                                                                      | morL    | 18  | 1     |
| -----AGCTGGAGCACAAAAGCCGGTGC-----                                                                       | mirL    | 23  | 225   |
| -----AGCTGGAGCACAAAAGCCGGT-----                                                                         | mirL    | 21  | 92    |
| -----AGCTGGAGCACAAAAGCCGGTG-----                                                                        | mirL    | 22  | 91    |
| -----AGCTGGAGCACAAAAGCCGGTGCC-----                                                                      | mirL    | 24  | 23    |
| -----AGCTGGAGCACAAAAGCCGG-----                                                                          | mirL    | 20  | 10    |
| -----AGCTGGAGCACAAAAGCCG-----                                                                           | mirL    | 19  | 4     |
| -----CTGGAGCACAAAAGCCGGTGC-----                                                                         | mirL    | 21  | 3     |
| -----TGGAGCACAAAAGCCGGT-----                                                                            | mirL    | 18  | 2     |
| -----AGCTGGAGCACAAAAGCCGGTGCCG-----                                                                     | mirL    | 25  | 1     |
| -----AAGCTGGAGCACAAAAGCCGGTGC-----                                                                      | mirL    | 24  | 1     |
| -----GCTGGAGCACAAAAGCCGGTGCC-----                                                                       | mirL    | 23  | 1     |
| -----GAAGCTGGAGCACAAAAG-----                                                                            | mirL    | 18  | 1     |
| -----GGTGTGATGCCTACACCG-----                                                                            | loop    | 18  | 2     |
| -----CCGACTTCTGGGCTCCGGCTTT-----                                                                        | mirR    | 22  | 1528  |
| -----CCGACTTCTGGGCTCCGGCTTTG-----                                                                       | mirR    | 23  | 210   |
| -----CCGACTTCTGGGCTCCGGCTTTGG-----                                                                      | mirR    | 24  | 121   |
| -----CCGACTTCTGGGCTCCGGCTT-----                                                                         | mirR    | 21  | 114   |
| -----CGACTTCTGGGCTCCGGCTTT-----                                                                         | mirR    | 21  | 41    |
| -----ACCGACTTCTGGGCTCCGGCTTT-----                                                                       | mirR    | 23  | 33    |
| -----ACCGACTTCTGGGCTCCGGCTTTGG-----                                                                     | mirR    | 25  | 32    |
| -----GACTTCTGGGCTCCGGCTTT-----                                                                          | mirR    | 20  | 26    |
| -----CCGACTTCTGGGCTCCGGCT-----                                                                          | mirR    | 20  | 21    |
| -----CCGACTTCTGGGCTCCGGCTTTGGA-----                                                                     | mirR    | 25  | 17    |
| -----ACCGACTTCTGGGCTCCGGCTTTG-----                                                                      | mirR    | 24  | 11    |
| -----CCGACTTCTGGGCTCCGGC-----                                                                           | mirR    | 19  | 10    |
| -----ACCGACTTCTGGGCTCCGGCTT-----                                                                        | mirR    | 22  | 3     |
| -----ACACCGACTTCTGGGCTC-----                                                                            | mirR    | 18  | 1     |
| -----CGACTTCTGGGCTCCGGCTTTGGA-----                                                                      | mirR    | 24  | 1     |
| -----ACCGACTTCTGGGCTCCGGCT-----                                                                         | mirR    | 21  | 1     |
| -----ACTTCTGGGCTCCGGCTT-----                                                                            | mirR    | 18  | 1     |
| -----ACCGACTTCTGGGCTCCGGC-----                                                                          | mirR    | 20  | 1     |
| -----ACTTCTGGGCTCCGGCTTT-----                                                                           | mirR    | 19  | 1     |
| -----CGACTTCTGGGCTCCGGC-----                                                                            | mirR    | 18  | 1     |

```

-----CGACTTCTGGGCTCCGGCTTTG----- mirR 22 1
-----AGGAAGGAGGTAGCCTCG morR 18 1
-----TGGAAGGAAGGAGGTAGC----- morR 18 1

>mmu-mir-704
AAGGGACTGTCCCTTGCACAGCTGGGAGCTAGAGGATGTGGTCAGCTGCAAGGATCTTCCTCAGACATGTGCTCTGCTCCTAGGGATTGTTGACTACATGATTGAGCAGTCTGGGCC species len reads
AAGGGACTGTCCCTTGCAC----- morL 18 3
-----CTGTCCCTTGCACAGCTG----- morL 18 2
-AGGGACTGTCCCTTGCACAGCT- morL 22 1
-AGGGACTGTCCCTTGCAC----- morL 18 1
-AGGGACTGTCCCTTGCACAG----- morL 20 1
---GACTGTCCCTTGCACAGCTG----- morL 20 1
---GGACTGTCCCTTGCACAGC----- morL 19 1
-----CTGGGAGCTAGAGGATGT----- mirL 18 12
-----AGCTGGGAGCTAGAGGAT----- mirL 18 6
-----AGCTGGGAGCTAGAGGATGTGGTCA----- mirL 25 3
-----AGCTGGGAGCTAGAGGATGTGGTC----- mirL 24 2
-----TGGGAGCTAGAGGATGTGGTCAGCTGC----- mirL 27 2
-----AGCTGGGAGCTAGAGGATGTGGT----- mirL 23 1
-----TGGGAGCTAGAGGATGTG----- mirL 18 1
-----AGCTGGGAGCTAGAGGATGT----- mirL 20 1
-----GGAGCTAGAGGATGTGGT----- mirL 18 1
-----GGGAGCTAGAGGATGTGGT----- mirL 19 1
-----CAGCTGCAAGGATCTTCC----- loop 18 1
-----CAGCTGCAAGGATCTTCCT----- loop 19 1
-----AGACATGTGCTCTGCTCCTAG----- mirR 21 1172
-----AGACATGTGCTCTGCTCCTA----- mirR 20 737
-----GACATGTGCTCTGCTCCTAG----- mirR 20 196
-----AGACATGTGCTCTGCTCCTAGG----- mirR 22 123
-----CATGTGCTCTGCTCCTAG----- mirR 18 96
-----AGACATGTGCTCTGCTCC----- mirR 18 51
-----ACATGTGCTCTGCTCCTAG----- mirR 19 47
-----GACATGTGCTCTGCTCCTAGG----- mirR 21 35
-----GACATGTGCTCTGCTCCT----- mirR 18 30
-----ACATGTGCTCTGCTCCTA----- mirR 18 26
-----AGACATGTGCTCTGCTCCT----- mirR 19 25
-----GACATGTGCTCTGCTCCTA----- mirR 19 24
-----AGACATGTGCTCTGCTCCTAGGGA----- mirR 24 11
-----AGACATGTGCTCTGCTCCTAGGG----- mirR 23 8
-----GACATGTGCTCTGCTCCTAGGG----- mirR 22 3
-----GACATGTGCTCTGCTCCTAGGGA----- mirR 23 2
-----AGGGATTGTTGACTACAT----- morR 18 2
-----GGGATTGTTGACTACATG----- morR 18 1
-----ATTGTTGACTACATGATT----- morR 18 1
-----GGGATTGTTGACTACATGATTGAGCAGTCTGGGCC morR 35 1

```

>mmu-mir-297a-4

| Sequence                                                                                                               | Species | Len | Reads |
|------------------------------------------------------------------------------------------------------------------------|---------|-----|-------|
| CCCCCAGTGTATGTGCCTGTGTGTATATGTATGTGTGCATGTGCATGTGTGTATATGAGTATACATATACATACACACATACCCATACAAGCATGCACACAAATACACGCAAATTCGC | morL    | 22  | 29    |
| ---CCCAGTGTATGTGCCTGTGTGT---                                                                                           | morL    | 20  | 11    |
| -----GTGTATGTGCCTGTGTGTAT-----                                                                                         | morL    | 20  | 11    |
| ---CCAGTGTATGTGCCTGTGTGTAT---                                                                                          | morL    | 23  | 11    |
| ---CAGTGTATGTGCCTGTGTGT---                                                                                             | morL    | 20  | 6     |
| ---CCAGTGTATGTGCCTGTGTGT---                                                                                            | morL    | 21  | 6     |
| -----AGTGTATGTGCCTGTGTGTAT-----                                                                                        | morL    | 21  | 6     |
| -CCCCAGTGTATGTGCCTGTGTGT-                                                                                              | morL    | 23  | 5     |
| ---CCCAGTGTATGTGCCTGTGTGTAT---                                                                                         | morL    | 24  | 3     |
| ---CCAGTGTATGTGCCTGTGTGTAT---                                                                                          | morL    | 22  | 2     |
| -----CAGTGTATGTGCCTGTGTGTAT-----                                                                                       | morL    | 22  | 2     |
| -----AGTGTATGTGCCTGTGTGTAT-----                                                                                        | morL    | 19  | 2     |
| -----GTGTATGTGCCTGTGTGTAT-----                                                                                         | morL    | 18  | 2     |
| CCCCCAGTGTATGTGCCTGTGTGTATATA---                                                                                       | morL    | 27  | 2     |
| -CCCCAGTGTATGTGCCTGTGTGTAT-                                                                                            | morL    | 25  | 2     |
| ---AGTGTATGTGCCTGTGTGT---                                                                                              | morL    | 18  | 1     |
| ---CCAGTGTATGTGCCTGTGTGT---                                                                                            | morL    | 20  | 1     |
| -----ATGTATGTGTGCATGTGCATGT-----                                                                                       | mirL    | 22  | 2164  |
| -----ATGTATGTGTGCATGTGCATGT-----                                                                                       | mirL    | 21  | 141   |
| -----ATGTATGTGTGCATGTGCATGTG-----                                                                                      | mirL    | 23  | 52    |
| -----ATGTATGTGTGCATGTGCATGTGT-----                                                                                     | mirL    | 24  | 45    |
| -----ATGTATGTGTGCATGTGCAT-----                                                                                         | mirL    | 20  | 38    |
| -----GTATGTGTGCATGTGCATGT-----                                                                                         | mirL    | 20  | 10    |
| -----TGTATGTGTGCATGTGCATGT-----                                                                                        | mirL    | 21  | 9     |
| -----ATGTATGTGTGCATGTGCAT-----                                                                                         | mirL    | 19  | 9     |
| -----GTATGTGTGCATGTGCATGT-----                                                                                         | mirL    | 19  | 4     |
| -----ATGTATGTGTGCATGTGC-----                                                                                           | mirL    | 18  | 4     |
| -----TATGTATGTGTGCATGTGCAT-----                                                                                        | mirL    | 21  | 3     |
| -----TGTATGTGTGCATGTGCATGT-----                                                                                        | mirL    | 20  | 2     |
| -----TATGTATGTGTGCATGTGCATGT-----                                                                                      | mirL    | 22  | 2     |
| -----ATATGTATGTGTGCATGTGC-----                                                                                         | mirL    | 20  | 2     |
| -----ATATGTATGTGTGCATGTGT-----                                                                                         | mirL    | 19  | 1     |
| -----ATATGTATGTGTGCATGTGCATGT-----                                                                                     | mirL    | 24  | 1     |
| -----TATATGTATGTGTGCATGTGT-----                                                                                        | mirL    | 20  | 1     |
| -----TGTATGTGTGCATGTGCATGTGT-----                                                                                      | mirL    | 23  | 1     |
| -----TGTATGTGTGCATGTGCATGTGT-----                                                                                      | mirL    | 22  | 1     |
| -----TATGTATGTGTGCATGTGCATGT-----                                                                                      | mirL    | 23  | 1     |
| -----GTATGTGTGCATGTGCAT-----                                                                                           | mirL    | 18  | 1     |
| -----TATATGTATGTGTGCATGTGC-----                                                                                        | mirL    | 21  | 1     |
| -----ATATGTATGTGTGCATGTGCAT-----                                                                                       | mirL    | 22  | 1     |
| -----GTATGTGTGCATGTGCATGTGT-----                                                                                       | mirL    | 21  | 1     |
| -----ATATGTATGTGTGCATGTGCATGTGT-----                                                                                   | mirL    | 26  | 1     |
| -----TACCCATACAAGCATGCA-----                                                                                           | mirR    | 18  | 29    |
| -----CCATACAAGCATGCACAC-----                                                                                           | mirR    | 18  | 2     |
| -----ATACCCATACAAGCATGCA-----                                                                                          | mirR    | 19  | 1     |

```
-----TACCCATACAAGCATGCAC----- mirR 19 1
-----AAATACACGCAAATCGC morR 18 1
-----ACAAATACACGCAAATC-- morR 18 1

>mmu-mir-1954
AGAGGTCAATGAGGTCAGCCAGAAGTGCAGAGTGAGACCCTGTGTTTTGTTGTTGTTGAGACGGGGTTTCTCTGTGTAGCCCTGGCTATCTAGAACTCACTCTGGAGACCAGGCTGGCCTTGAATCAGAGATCTGC
AGAGGTCAATGAGGTCAGCCAG-----
-----ATGAGGTCAGCCAGAAGT-----
-----TCAATGAGGTCAGCCAGAAGT-----
-----GGTCAATGAGGTCAGCCAGA-----
-----TCAATGAGGTCAGCCAGAAC-----
AGAGGTCAATGAGGTCAGCCA-----
-----AGGTCAATGAGGTCAGCCA-----
-----ACTGCAGAGTGAGACCCTGTT-----
-----ACTGCAGAGTGAGACCCTGT-----
-----ACTGCAGAGTGAGACCCTGTG-----
-----CTGCAGAGTGAGACCCTGTT-----
-----ACTGCAGAGTGAGACCCTG-----
-----ACTGCAGAGTGAGACCCT-----
-----ACTGCAGAGTGAGACCCTGTTGT-----
-----AACTGCAGAGTGAGACCCTGTT-----
-----TGCAGAGTGAGACCCTGT-----
-----CTGCAGAGTGAGACCCTGT-----
-----AGAAGTGCAGAGTGAGAC-----
-----AACTGCAGAGTGAGACCCTGT-----
-----GCAGAGTGAGACCCTGTT-----
-----ACTGCAGAGTGAGACCCTGTTGTT-----
-----CTGCAGAGTGAGACCCTG-----
-----TGCAGAGTGAGACCCTGTT-----
-----AGAAGTGCAGAGTGAGACC-----
-----AACTGCAGAGTGAGACCCT-----
-----CACTCTGGAGACCAGGCT-----
-----ACTCACTCTGGAGACCAG-----
-----ACTCTGGAGACCAGGCTG-----
-----CTCTGGAGACCAGGCTGGCCTT-----
-----CTCACTCTGGAGACCAGGCTGGCCTTGA-----
-----ACTCTGGAGACCAGGCTGG-----
-----ACTCACTCTGGAGACCAGGCTG-----
-----TCACTCTGGAGACCAGGCTGG-----
-----CACTCTGGAGACCAGGCTG-----
-----TCACTCTGGAGACCAGGCTGGC-----
-----TCACTCTGGAGACCAGGC-----
-----TGGCCTTGAATCAGAGATCTGC-----
-----GCCTTGAATCAGAGATC-----
-----TGGCCTTGAATCAGAGA-----
-----CTGGCCTTGAATCAGAGA-----
```

```

-----GCTGGCCTTGAAGCTCAGAGATCTGC
-----GGCCTTGAAGCTCAGAGATCTGC
-----CTTGAAGCTCAGAGATCTGC
-----CTTGAAGCTCAGAGATCTG-
-----GGCCTTGAAGCTCAGAGAT-
-----CTGGCCTTGAAGCTCAGAGATCTGC
-----GCCTTGAAGCTCAGAGATCTGC
-----CTGGCCTTGAAGCTCAGAG-
-----CCTTGAAGCTCAGAGATCTG-
-----GCTGGCCTTGAAGCTCAGAGATCTG-
-----GCCTTGAAGCTCAGAGATCTG-
-----TGGCCTTGAAGCTCAGAGAT-
-----GGCCTTGAAGCTCAGAGATC-

```

>mmu-mir-489

| Sequence                                                                                     | species | len | reads |
|----------------------------------------------------------------------------------------------|---------|-----|-------|
| GGCAGCTTGGTTGTCATATGTGTGATGACACTTTCTAAAGTCTTCCAGAATGACACCACATATATGGCAGCTAAACTGTTACATGGAACAAC | morL    | 18  | 1     |
| -GCAGCTTGGTTGTCATAT-                                                                         | morL    | 18  | 1     |
| GGCAGCTTGGTTGTCATA                                                                           | mirL    | 18  | 42    |
| -ATGTGTGATGACACTTTC-                                                                         | mirL    | 19  | 18    |
| -ATGTGTGATGACACTTTCT-                                                                        | mirL    | 19  | 9     |
| TATGTGTGATGACACTTTC-                                                                         | mirL    | 18  | 5     |
| TATGTGTGATGACACTTT                                                                           | mirL    | 18  | 4     |
| -GTGTGATGACACTTTCTA-                                                                         | mirL    | 20  | 3     |
| -ATGTGTGATGACACTTTCTA-                                                                       | mirL    | 22  | 2     |
| CATATGTGTGATGACACTTTCT-                                                                      | mirL    | 20  | 1     |
| -ATATGTGTGATGACACTTTC-                                                                       | mirL    | 20  | 1     |
| CATATGTGTGATGACACTTT                                                                         | mirR    | 23  | 1299  |
| -AATGACACCACATATATGGCAGC-                                                                    | mirR    | 22  | 418   |
| -AATGACACCACATATATGGCAG-                                                                     | mirR    | 21  | 202   |
| -AATGACACCACATATATGGCA-                                                                      | mirR    | 22  | 129   |
| -ATGACACCACATATATGGCAGC-                                                                     | mirR    | 20  | 85    |
| GACACCACATATATGGCAGC-                                                                        | mirR    | 21  | 74    |
| TGACACCACATATATGGCAGC-                                                                       | mirR    | 19  | 49    |
| -AATGACACCACATATATGGCAGCT-                                                                   | mirR    | 24  | 49    |
| -ATGACACCACATATATGGCAG-                                                                      | mirR    | 21  | 28    |
| -AATGACACCACATATATGGCAGCTA-                                                                  | mirR    | 25  | 21    |
| GACACCACATATATGGCAG-                                                                         | mirR    | 19  | 18    |
| -AATGACACCACATATATGGC-                                                                       | mirR    | 20  | 15    |
| TGACACCACATATATGGCAGCT-                                                                      | mirR    | 22  | 14    |
| -AATGACACCACATATATG-                                                                         | mirR    | 18  | 12    |
| -ATGACACCACATATATGGCA-                                                                       | mirR    | 20  | 11    |
| -TGACACCACATATATGGCAG-                                                                       | mirR    | 20  | 9     |
| -GAATGACACCACATATATGGCAGC-                                                                   | mirR    | 24  | 9     |
| -ATGACACCACATATATGGCAGCT-                                                                    | mirR    | 23  | 5     |
| GACACCACATATATGGCA-                                                                          | mirR    | 18  | 4     |

C:\Documents and Settings\hong\Desktop\Reprogramming-total RNA.txt

```
-----TGACACCACATATATGGCAGCTAA----- mirR 24 3
-----TGACACCACATATATGGC----- mirR 18 3
-----TGACACCACATATATGGCAGCTA----- mirR 23 1
-----AACTGTTACATGGAACAA- morR 18 2
-----ACTGTTACATGGAACAAC morR 18 1
-----AGCTAAACTGTTACATGG----- morR 18 1
```

>mmu-mir-719

```
AGGTGCTTAAAGAACAGTATCTCGGCTACAGAAAAATGTTTTGGGTGATGCTGTGGATGTGTTTGAAGCCAGGAGAACAGAAGCCAAGAAGTGGCAGAATGCACCCAGAGTTACTACTGGACCCACTCCTTTCAGCACCA
-GGTGCTTAAAGAACAGTATC-----
-GGTGCTTAAAGAACAGTA-----
AGGTGCTTAAAGAACAGT-----
---TGCTTAAAGAACAGTATC-----
-----ATCTCGGCTACAGAAAAATG-----
-----ATCTCGGCTACAGAAAAATGT-----
-----ATCTCGGCTACAGAAAAATGTT-----
-----ATCTCGGCTACAGAAAA-----
-----ATCTCGGCTACAGAAAAAT-----
-----CTCGGCTACAGAAAAATGT-----
-----TCTCGGCTACAGAAAAATGTT-----
-----CTCGGCTACAGAAAAATG-----
-----TCTCGGCTACAGAAAAATGT-----
-----TCTCGGCTACAGAAAAATG-----
-----TCGGCTACAGAAAAATGT-----
-----ATCTCGGCTACAGAAAAATGTT-----
-----TATCTCGGCTACAGAAAAATGT-----
-----CTCGGCTACAGAAAAATGTT-----
-----ATGCCACCCAGAGTTACTACTGGACCCACTC-----
-----AGAATGCACCCAGAGTTA-----
-----TGACCCAGAGTTACTACTGGACCCA-----
-----ATGCCACCCAGAGTTACTAC-----
-----TTCAGCACCA
-----CCTTTCAGCACCA
-----CTTTCAGCACCA
-----TTCAGCACCA
-----TTTCAGCACCA
-----TTTCAGCACCA
-----CCTTTCAGCACCA
-----TTTCAGCACCA
-----TCCTTTCAGCACCA
-----CCTTTCAGCACCA
-----CCTTTCAGCACCA
```

>mmu-mir-297a-6

```
TGTGCATTGTGCATGTGTGTATGTGCATGAGTGCATGTGCATGCATGTGTGTGCGCATGTATGTGTGCATGTGCATGTATGTGTGCATGTGCATGTGT species len reads
TGTGCATTGTGCATGTGCATGTGT----- morL 24 3
```

---

```
--TGCATTGTGCATGTGCATGTGT----- morL 22 2
-----TTGTGCATGTGCATGTGTGTA----- morL 21 2
-----ATTGTGCATGTGCATGTGTGTA----- morL 22 1
-----ATTGTGCATGTGCATGTGTGTAT----- morL 23 1
---GCATTGTGCATGTGCATGTGTG----- morL 22 1
-----TTGTGCATGTGCATGTGT----- morL 18 1
-----ATGTGCATGAGTGCATGT----- mirL 18 5
-----TGTGCATGAGTGCATGTG----- mirL 18 2
-----GTGCATGAGTGCATGTGC----- mirL 18 1
-----TGTATGTGCATGAGTGCATGTG----- mirL 22 1
-----ATGTGCATGAGTGCATGTGC----- mirL 20 1
-----TGTGCATGAGTGCATGTGCA----- mirL 20 1
-----ATGTATGTGTGCATGTGCATGT-- mirR 22 2159
-----ATGTATGTGTGCATGTGCATG--- mirR 21 141
-----ATGTATGTGTGCATGTGCATGTG- mirR 23 52
-----ATGTATGTGTGCATGTGCATGTGT mirR 24 43
-----ATGTATGTGTGCATGTGCAT--- mirR 20 38
-----GTATGTGTGCATGTGCATGT-- mirR 20 10
-----ATGTATGTGTGCATGTGCA---- mirR 19 9
-----TGTATGTGTGCATGTGCATGT-- mirR 21 9
-----GTATGTGTGCATGTGCATG--- mirR 19 4
-----ATGTATGTGTGCATGTGC----- mirR 18 3
-----TGCATGTATGTGTGCATGTGCA---- mirR 22 2
-----TGTATGTGTGCATGTGCATG--- mirR 20 2
-----CATGTATGTGTGCATGTGCA---- mirR 20 2
-----GTATGTGTGCATGTGCAT---- mirR 18 1
-----TGTATGTGTGCATGTGCATGTG- mirR 22 1
-----GTATGTGTGCATGTGCATGTG- mirR 21 1
-----TGTATGTGTGCATGTGCATGTGT mirR 23 1

>mmu-mir-297a-1
AATATGTATGTATGTATGTATGTATGTGCATGTGCATGTGCATGTATGCATATTGCATGTATATATTATGCATACATGTATGTTTGTATGTGTACTACAGCATGCAGGTGCT species len read
AATATGTATGTATGTATG----- morL 18 1
-----ATGTATGTGTGCATGTGCATGT----- mirL 22 2163
-----ATGTATGTGTGCATGTGCATG----- mirL 21 141
-----ATGTATGTGTGCATGTGCATGTG----- mirL 23 52
-----ATGTATGTGTGCATGTGCAT----- mirL 20 38
-----ATGTATGTGTGCATGTGCATGTGC----- mirL 24 24
-----GTATGTGTGCATGTGCATGT----- mirL 20 10
-----TGTATGTGTGCATGTGCATGT----- mirL 21 9
-----ATGTATGTGTGCATGTGCA---- mirL 19 9
-----ATGTATGTGTGCATGTGC----- mirL 18 4
-----GTATGTGTGCATGTGCATG----- mirL 19 4
-----TATGTGTGCATGTGCATGTGC----- mirL 21 4
-----TATGTATGTGTGCATGTGCAT----- mirL 21 3
-----TGTATGTATGTGTGCATGTG----- mirL 20 3
```

```

-----TATGTATGTGTGCATGTGCATG----- mirL 22 2
-----TGTATGTGTGCATGTGCATG----- mirL 20 2
-----GTATGTGTGCATGTGCATGTGC----- mirL 22 1
-----TGTATGTATGTGTGCATGTGC----- mirL 21 1
-----GTATGTGTGCATGTGCATGTG----- mirL 21 1
-----TATGTATGTGTGCATGTGCATGT----- mirL 23 1
-----TGTATGTGTGCATGTGCATGTG----- mirL 22 1
-----GTATGTGTGCATGTGCAT----- mirL 18 1
-----GTACTACAGCATGCAGGTG-- mirR 19 4
-----TGTACTACAGCATGCAGGTGCT mirR 22 1
-----TGTACTACAGCATGCAGGT-- mirR 19 1

```

>mmu-mir-297a-2

```

TATATGTGTTTCATGCATGTGTGTATGTGCATGCATATGTGCTCATGTGTGTGTACATGTATGTGTGCATGTGCATGTATATATGTGTGTGCATGCATGTGT species len reads
-----GTTTCATGCATGTGTGTAT----- morL 18 1
-ATATGTGTTTCATGCATGTGTGT----- morL 22 1
TATATGTGTTTCATGCATGTGTG----- morL 22 1
---ATGTGTTTCATGCATGTGTGTAT----- morL 22 1
-----ATGTGCATGCATATGTGC----- mirL 18 2
-----GTGTATGTGCATGCATATGTG----- mirL 21 2
-----TATGTGCATGCATATGTGC----- mirL 19 2
-----GCTCATGTGTGTGTACAT----- loop 18 3
-----ATGTATGTGTGCATGTGCATGT----- mirR 22 2164
-----ATGTATGTGTGCATGTGCATG----- mirR 21 141
-----ATGTATGTGTGCATGTGCAT----- mirR 20 38
-----ATGTATGTGTGCATGTGCATGTA----- mirR 23 27
-----ATGTATGTGTGCATGTGCATGTATA----- mirR 25 17
-----ATGTATGTGTGCATGTGCATGTAT----- mirR 24 17
-----GTATGTGTGCATGTGCATGT----- mirR 20 10
-----TGTATGTGTGCATGTGCATGT----- mirR 21 9
-----ATGTATGTGTGCATGTGCA----- mirR 19 9
-----GTATGTGTGCATGTGCATG----- mirR 19 4
-----CATGTATGTGTGCATGTGCA----- mirR 20 2
-----TGTATGTGTGCATGTGCATG----- mirR 20 2
-----ACATGTATGTGTGCATGTGC----- mirR 20 1
-----GTATGTGTGCATGTGCAT----- mirR 18 1
-----ATATGTGTGTGCATGCATGT-- morR 20 7
-----ATATATGTGTGTGCATGCATGT-- morR 22 5
-----TATATATGTGTGTGCATGCATG--- morR 22 1
-----TATATATGTGTGTGCATG----- morR 18 1
-----ATATATGTGTGTGCATGCAT---- morR 20 1
-----TGTATATATGTGTGTGCATGC----- morR 21 1
-----TATATATGTGTGTGCATGC----- morR 19 1
-----ATATGTGTGTGCATGCATGTGT morR 22 1
-----TATGTGTGTGCATGCATGTGT morR 21 1
-----TATATGTGTGTGCATGCATGT-- morR 21 1

```



```

-----ATATGTGTGTGCATGCATG--- morR 19 1
-----ATATATGTGTGTGCATGC----- morR 18 1

>mmu-mir-7b
AGTACGTGAGCCAGTGCTATGTGGAAGACTTGTGATTTTGTGTTCTGATATGATATGACAACAAGTCACAGCCAGCCTCATAGCGTGGACTCCTATCAC species len reads
AGTACGTGAGCCAGTGCTATG----- morL 21 6
-----TGGAAGACTTGTGATTTTGTGTT----- mirL 23 804
-----TGGAAGACTTGTGATTTTGTGTT----- mirL 24 698
-----TGGAAGACTTGTGATTTTGT----- mirL 19 236
-----TGGAAGACTTGTGATTTGTT----- mirL 21 216
-----TGGAAGACTTGTGATTTTGTGTT----- mirL 25 75
-----TGGAAGACTTGTGATTTTGTGTT----- mirL 22 72
-----GGAAGACTTGTGATTTTGTGTT----- mirL 22 67
-----TGGAAGACTTGTGATTTTGT----- mirL 20 67
-----GGAAGACTTGTGATTTTGT----- mirL 20 28
-----GGAAGACTTGTGATTTTGTGTT----- mirL 23 21
-----AAGACTTGTGATTTTGTGTT----- mirL 20 13
-----GTGGAAGACTTGTGATTTTGTGTT----- mirL 24 7
-----GAAGACTTGTGATTTTGTGTT----- mirL 20 7
-----GTGGAAGACTTGTGATTTTGT----- mirL 20 5
-----GAAGACTTGTGATTTTGT----- mirL 18 5
-----GGAAGACTTGTGATTTTGT----- mirL 18 3
-----AAGACTTGTGATTTTGT----- mirL 18 3
-----GAAGACTTGTGATTTTGTGTT----- mirL 21 2
-----GGAAGACTTGTGATTTTGT----- mirL 19 2
-----AAGACTTGTGATTTTGTGTT----- mirL 22 2
-----GGAAGACTTGTGATTTTGTGTT----- mirL 24 1
-----GTGGAAGACTTGTGATTTTGTGTT----- mirL 25 1
-----ATGTGGAAGACTTGTGAT----- mirL 18 1
-----TGTGGAAGACTTGTGAT----- mirL 18 1
-----GTGGAAGACTTGTGATTT----- mirL 19 1
-----GGAAGACTTGTGATTTTGTGTT----- mirL 21 1
-----TTCTGATATGATATGACAA----- loop 19 1
-----TTCTGATATGATATGACA----- loop 18 1
-----CAACAAGTCACAGCCAGCCTCA----- mirR 22 88
-----CAACAAGTCACAGCCAGCCTC----- mirR 21 15
-----CAACAAGTCACAGCCAGCCTCAT----- mirR 23 8
-----CAACAAGTCACAGCCAGC----- mirR 18 5
-----CAACAAGTCACAGCCAGCCT----- mirR 20 3
-----CAACAAGTCACAGCCAGCC----- mirR 19 3
-----GACAACAAGTCACAGCCA----- mirR 18 1
-----TCATAGCGTGGACTCCTATC----- morR 20 1
-----AGCGTGGACTCCTATCAC morR 18 1

```

```

>mmu-mir-194-1
AACTGATGGAGTCATCGGGTGTAAACAGCAACTCCATGTGGACTGTGCTCGGATTCAGTGGAGCTGCTGTTACTTCTGATGGCCTCC species len reads

```

```

AACTGATGGAGTCATCGGG----- morL 19 1
-----TGTAACAGCAACTCCATGTGGA----- mirL 22 1773
-----TGTAACAGCAACTCCATGTGG----- mirL 21 469
-----TGTAACAGCAACTCCATGTGGAC----- mirL 23 62
-----TGTAACAGCAACTCCATGT----- mirL 19 30
-----TGTAACAGCAACTCCATGTG----- mirL 20 28
-----GTAACAGCAACTCCATGTGG----- mirL 20 26
-----GTAACAGCAACTCCATGTGGA----- mirL 21 22
-----TGTAACAGCAACTCCATGTGGACT----- mirL 24 15
-----TGTAACAGCAACTCCATGTGGACTG----- mirL 25 11
-----GTAACAGCAACTCCATGTGGAC----- mirL 22 3
-----GTAACAGCAACTCCATGT----- mirL 18 1
-----GTAACAGCAACTCCATGTG----- mirL 19 1
-----AACAGCAACTCCATGTGG----- mirL 18 1
-----GGTGTAAACAGCAACTCCAT----- mirL 19 1
-----GTAACAGCAACTCCATGTGGACTG----- mirL 24 1
-----GTAACAGCAACTCCATGTGGACT----- mirL 23 1
-----TCGGATTCCAGTGGAGCTG----- mirR 19 12
-----GATTCCAGTGGAGCTGCTG----- mirR 19 1
-----TCGGATTCCAGTGGAGCTGCT----- mirR 21 1
-----TGTTACTTCTGATGGCCTCC morR 20 1
-----CTGTTACTTCTGATGGCC--- morR 18 1
-----CTGCTGTTACTTCTGATGGC--- morR 20 1

>mmu-mir-690
TGTTTTGTGTTTTTGTGGAGCTAATTGGCTGTATTAAGTGCTAGTAAGAAACATTCTCCTCCAGCTGGAGAGATGGCTCAGCTGTTAAAGGCTAGGCTCACAACCAAAATATAAGAACCCTCT species len r
-----TGTGTTTTTGTGGAGCTAA----- morL 19 1
TGTTTTGTGTTTTTGTGGAG----- morL 20 1
-----ATTGGCTGTATTAAGTG----- mirL 18 4
-----TGGCTGTATTAAGTGCTA----- mirL 19 3
-----TGGCTGTATTAAGTGCTAG----- mirL 20 1
-----TGGCTGTATTAAGTGCT----- mirL 18 1
-----AAAGGCTAGGCTCACAACCAAA----- mirR 22 1590
-----AAAGGCTAGGCTCACAACCAA----- mirR 21 121
-----GGCTAGGCTCACAACCAAA----- mirR 19 108
-----AAAGGCTAGGCTCACAACCA----- mirR 20 54
-----AAGGCTAGGCTCACAACCAAA----- mirR 21 45
-----GTTAAAGGCTAGGCTCACA----- mirR 20 41
-----AAAGGCTAGGCTCACAACCAAAATA----- mirR 25 40
-----GTTAAAGGCTAGGCTCAC----- mirR 18 37
-----GTTAAAGGCTAGGCTCACA----- mirR 19 36
-----AAAGGCTAGGCTCACAAC----- mirR 18 33
-----AGGCTAGGCTCACAACCAAA----- mirR 21 30
-----AGGCTAGGCTCACAACCAAA----- mirR 20 26
-----GTTAAAGGCTAGGCTCACAACCA----- mirR 23 22
-----AAAGGCTAGGCTCACAACCAAAATAT----- mirR 26 20

```

```

-----AGGCTAGGCTCACAACCAAAATATAA----- mirR 26 19
-----GGCTAGGCTCACAACCAAAATAT----- mirR 23 19
-----TAAAGGCTAGGCTCACAACCA----- mirR 21 13
-----GTAAAGGCTAGGCTCACAACCAA----- mirR 24 13
-----AGGCTAGGCTCACAACCAAAATA----- mirR 23 12
-----AGGCTAGGCTCACAACCAAAATATA----- mirR 25 12
-----GTAAAGGCTAGGCTCACAAC----- mirR 21 12
-----AAAGGCTAGGCTCACAACC----- mirR 19 11
-----TTAAAGGCTAGGCTCACAACCA----- mirR 22 11
-----TAAAGGCTAGGCTCACAAC----- mirR 19 10
-----GTAAAGGCTAGGCTCACAACC----- mirR 22 10
-----AGGCTAGGCTCACAACCA----- mirR 18 10
-----AAGGCTAGGCTCACAACCAAAAT----- mirR 23 9
-----TTAAAGGCTAGGCTCACAAC----- mirR 20 8
-----TAAAGGCTAGGCTCACAACCAA----- mirR 23 8
-----AGGCTAGGCTCACAACCAA----- mirR 19 7
-----AAGGCTAGGCTCACAACCA----- mirR 19 6
-----AAGGCTAGGCTCACAACC----- mirR 18 6
-----AAGGCTAGGCTCACAACCAAAATA----- mirR 24 6
-----AAGGCTAGGCTCACAACCAAAA----- mirR 22 5
-----TAAAGGCTAGGCTCACAACC----- mirR 20 5
-----GGCTAGGCTCACAACCAAAAT----- mirR 21 4
-----GGCTAGGCTCACAACCAA----- mirR 18 4
-----AAGGCTAGGCTCACAACCAAAATATAA----- mirR 27 4
-----GGCTAGGCTCACAACCAAAATA----- mirR 22 3
-----TTAAAGGCTAGGCTCACA----- mirR 18 2
-----TAAAGGCTAGGCTCACAACCAAAATA----- mirR 26 2
-----TAAAGGCTAGGCTCACAA----- mirR 18 2
-----TAAAGGCTAGGCTCACAACCAAAA----- mirR 24 2
-----TTAAAGGCTAGGCTCACAA----- mirR 19 2
-----GGCTAGGCTCACAACCAAAATATAA----- mirR 25 1
-----TTAAAGGCTAGGCTCACAACCAAAATA----- mirR 27 1
-----GGCTAGGCTCACAACCAAAATATAAGA----- mirR 27 1
-----TTAAAGGCTAGGCTCACAACCAAAA----- mirR 24 1
-----AAATATAAGAACCCTCT morR 18 1
-----AAAATATAAGAACCCTCT- morR 18 1

```

>mmu-mir-1-2-as

```

GGACATTACCTACCCAAAATACATACTTCTTTACATTCCATAGCACTGAATGTTTCATATGGGTACATAAAGAAGTATGTGCTCTGAGTAGGCACTCCTGCGCCGGCCGATAGCTGTGAAAACATGAAGCAGCCACCTCAC
GGACATTACCTACCCAAA

```

```

-----TACATACTTCTTTACATTCCA-----
-----ACATACTTCTTTACATTCCA-----
-----TACATACTTCTTTACATTCC-----
-----TACATACTTCTTTACATTCCAT-----
-----TACATACTTCTTTACATTCCATA-----
-----ATACATACTTCTTTACATTCCA-----

```

```

-----TACATACTTCTTTACATT-----
-----CATACTTCTTTACATTCCA-----
-----ATACTTCTTTACATTCCA-----
-----ACATACTTCTTTACATTCCATA-----
-----ACATACTTCTTTACATTCCAT-----
-----TACATACTTCTTTACATT-----
-----ACATACTTCTTTACATTCC-----
-----CATACTTCTTTACATTCC-----
-----ATACATACTTCTTTACATT-----
-----ACATACTTCTTTACATT-----
-----ACATACTTCTTTACATTCCATAG-----
-----TACATACTTCTTTACATTCCATAG-----
-----ATACATACTTCTTTACATTCC-----
-----AAATACATACTTCTTTAC-----
-----AGCAGCCCACCTCAC
-----AGCAGCCCACCTCAC
-----GAAGCAGCCCACCTCAC
-----AGCAGCCCACCTCAC
-----GCAGCCCACCTCAC
-----AGCCCACCTCAC
-----AGCAGCCCACCTCAC

```

>mmu-mir-3096

| Sequence                                                                                                    | species | len | reads |
|-------------------------------------------------------------------------------------------------------------|---------|-----|-------|
| ATTCCAGGAACAGTTCTTGGCCAAGGATGAGAACTCTAACCTGACAGGATACGCTGCTGTGATGGGTTAAAGGATTTACCTGAGGCCAACAGAACAGGCAGGAATTT | morL    | 18  | 3     |
| ATTCCAGGAACAGTTCTT                                                                                          | morL    | 19  | 1     |
| --TCCAGGAACAGTTCTTGGC-----                                                                                  | morL    | 19  | 1     |
| ATTCCAGGAACAGTTCTTG-----                                                                                    | morL    | 19  | 1     |
| -TTCCAGGAACAGTTCTTG-----                                                                                    | morL    | 18  | 1     |
| ---CCAGGAACAGTTCTTGGC-----                                                                                  | morL    | 18  | 1     |
| -----GGCCAAGGATGAGAACTCTAACCTGA-----                                                                        | mirL    | 26  | 215   |
| -----GGCCAAGGATGAGAACTCTAAC-----                                                                            | mirL    | 23  | 181   |
| -----GGCCAAGGATGAGAACTCTAAC-----                                                                            | mirL    | 22  | 164   |
| -----TGGCCAAGGATGAGAACTCTAACCTGA-----                                                                       | mirL    | 27  | 140   |
| -----GGCCAAGGATGAGAACTCTAACCTGAC-----                                                                       | mirL    | 27  | 135   |
| -----TGGCCAAGGATGAGAACTCTAACCTGAC-----                                                                      | mirL    | 28  | 122   |
| -----GGCCAAGGATGAGAACTCTA-----                                                                              | mirL    | 20  | 97    |
| -----TGGCCAAGGATGAGAACTCTAAC-----                                                                           | mirL    | 24  | 93    |
| -----TGGCCAAGGATGAGAACTCTAAC-----                                                                           | mirL    | 23  | 76    |
| -----GGCCAAGGATGAGAACTCTAA-----                                                                             | mirL    | 21  | 48    |
| -----GCCAAGGATGAGAACTCTAACCTGACA-----                                                                       | mirL    | 27  | 47    |
| -----TGGCCAAGGATGAGAACTCTA-----                                                                             | mirL    | 21  | 42    |
| -----GGCCAAGGATGAGAACTC-----                                                                                | mirL    | 18  | 38    |
| -----TGGCCAAGGATGAGAACTCTAA-----                                                                            | mirL    | 22  | 36    |
| -----GCCAAGGATGAGAACTCTA-----                                                                               | mirL    | 19  | 30    |
| -----TGGCCAAGGATGAGAACTCTAACCTGACA-----                                                                     | mirL    | 29  | 29    |
| -----GCCAAGGATGAGAACTCT-----                                                                                | mirL    | 18  | 16    |

```

-----GCCAAGGATGAGAACTCTAACCTGA----- mirL 25 15
-----GCCAAGGATGAGAACTCTAA----- mirL 20 11
-----GCCAAGGATGAGAACTCTAACCTGAC----- mirL 26 7
-----GCCAAGGATGAGAACTCTAAC----- mirL 21 7
-----CCAAGGATGAGAACTCTAACCTGAC----- mirL 25 3
-----CTTGCCAAGGATGAGAA----- mirL 18 2
-----CCAAGGATGAGAACTCTA----- mirL 18 1
-----CTTGCCAAGGATGAGAACTCTAA----- mirL 24 1
-----CCAAGGATGAGAACTCTAAC----- mirL 21 1
-----TTGCCAAGGATGAGAACTCTAACCTGACA----- mirL 30 1
-----CAAGGATGAGAACTCTAACCTGAC----- mirL 24 1
-----TGCTGTGATGGGTTAAAGGATTTACCTGAGGCC----- mirR 33 331
-----TGCTGTGATGGGTTAAAGGATTTACCTGAGG----- mirR 31 93
-----GCTGTGATGGGTTAAAGGATTTACCTGAGGCC----- mirR 32 76
-----TGCTGTGATGGGTTAAAGGATTTACCTGAGGCC----- mirR 32 59
-----CTGCTGTGATGGGTTAAAGGATTTACCTGAGGCC----- mirR 34 40
-----TGCTGTGATGGGTTAAAGGATTTACCTGAG----- mirR 30 39
-----TGCTGTGATGGGTTAAAGGATTTAC----- mirR 25 37
-----CTGTGATGGGTTAAAGGATTTACCTGAGGCCA----- mirR 32 36
-----CTGCTGTGATGGGTTAAAGGATTTACCTGAGGCC----- mirR 33 26
-----TGCTGTGATGGGTTAAAGGATTTACCTGA----- mirR 29 20
-----CTGCTGTGATGGGTTAAAGGATTTACCTGAG----- mirR 31 13
-----CTGCTGTGATGGGTTAAAGGATTTAC----- mirR 26 11
-----CTGTGATGGGTTAAAGGATTTACCTGAGGCC----- mirR 31 10
-----GCTGTGATGGGTTAAAGGATTTACCTGAGG----- mirR 30 9
-----CTGCTGTGATGGGTTAAAGGAT----- mirR 22 7
-----TGCTGTGATGGGTTAAAGGATTTACCT----- mirR 27 6
-----GCTGTGATGGGTTAAAGGATTTACCTGAGGCC----- mirR 31 6
-----CTGTGATGGGTTAAAGGATTT----- mirR 21 5
-----CTGCTGTGATGGGTTAAAGGATTTACCTGAGG----- mirR 32 3
-----GCTGTGATGGGTTAAAGGATTT----- mirR 25 3
-----GCTGTGATGGGTTAAAGGATTTACCTGAGGCC----- mirR 34 2
-----GCTGTGATGGGTTAAAGGATTTACCTGA----- mirR 31 2
-----CTGCTGTGATGGGTTAAAGGATTTACCT----- mirR 28 2
-----GCTGTGATGGGTTAAAGGATTTACCTGAGGCC----- mirR 35 2
-----GCTGTGATGGGTTAAAGGATTTACCTGAG----- mirR 29 2
-----CTGTGATGGGTTAAAGGATTTACCTGAGGCCAAC----- mirR 34 2
-----GCTGTGATGGGTTAAAGGATTT----- mirR 22 2
-----GCTGTGATGGGTTAAAGGATTTACCT----- mirR 26 2
-----CTGTGATGGGTTAAAGGATTTACCTGAGG----- mirR 29 1
-----CTGTGATGGGTTAAAGGATTTACCTGA----- mirR 27 1
-----TGTGATGGGTTAAAGGATTTACCTGAGGCCAAC----- mirR 33 1
-----GCTGTGATGGGTTAAAGGATTTAC----- mirR 27 1
-----GCTGTGATGGGTTAAAGGATTTACCTGAG----- mirR 32 1
-----CTGTGATGGGTTAAAGGATTTACCT----- mirR 25 1
-----GCTGTGATGGGTTAAAGGATTTACCT----- mirR 29 1

```

```

-----AACAGAACAGGCAGGAAT-- morR 18 5
-----GCCAACAGAACAGGCAGGA---- morR 19 4
-----CAACAGAACAGGCAGGAA--- morR 18 1
-----ACAGAACAGGCAGGAATTT morR 19 1
-----CCAACAGAACAGGCAGGAA--- morR 19 1
-----ACAGAACAGGCAGGAATT- morR 18 1
-----CAGAACAGGCAGGAATTT morR 18 1

```

>mmu-mir-466m

| Sequence                                                                                                     | species | len | reads |
|--------------------------------------------------------------------------------------------------------------|---------|-----|-------|
| GCCCCTATGTATGTGCCTGTGTGTTCTTTGTGTGCATGTGCATGTGTATATGAATATACATATACATACACACATACACACGCACGTACACACACAAACACACATACA | morL    | 20  | 6     |
| -----CTATGTATGTGCCTGTGTGT-----                                                                               | morL    | 24  | 3     |
| GCCCCTATGTATGTGCCTGTGTGT-----                                                                                | morL    | 18  | 3     |
| -----TGTATGTGCCTGTGTGTG-----                                                                                 | morL    | 18  | 3     |
| -----ATGTGCCTGTGTGTGTTC-----                                                                                 | morL    | 20  | 2     |
| -----TGTATGTGCCTGTGTGTGTT-----                                                                               | morL    | 20  | 2     |
| -----ATGTATGTGCCTGTGTGTGT-----                                                                               | morL    | 21  | 1     |
| -----TGTATGTGCCTGTGTGTGTTC-----                                                                              | morL    | 22  | 1     |
| -----CTATGTATGTGCCTGTGTGTGT-----                                                                             | morL    | 18  | 1     |
| -----TGTCCTGTGTGTGTTCT-----                                                                                  | morL    | 23  | 1     |
| -CCCTATGTATGTGCCTGTGTGT-----                                                                                 | morL    | 22  | 1     |
| -----TATGTATGTGCCTGTGTGTGTT-----                                                                             | morL    | 18  | 1     |
| -----GTATGTGCCTGTGTGTGT-----                                                                                 | morL    | 20  | 1     |
| -----TATGTATGTGCCTGTGTGTG-----                                                                               | morL    | 21  | 1     |
| -----CCTATGTATGTGCCTGTGTGT-----                                                                              | morL    | 19  | 1     |
| -----TATGTATGTGCCTGTGTGT-----                                                                                | morL    | 18  | 1     |
| -----TATGTGCCTGTGTGTGTT-----                                                                                 | morL    | 22  | 1     |
| --CCCTATGTATGTGCCTGTGTGT-----                                                                                | morL    | 21  | 1     |
| -----TGTATGTGCCTGTGTGTGT-----                                                                                | mirL    | 22  | 70    |
| -----ATGTATGTGCCTGTGTGTGTT-----                                                                              | mirL    | 24  | 48    |
| -----TCTTGTGTGTGCATGTGCATGT-----                                                                             | mirL    | 23  | 22    |
| -----TCTTGTGTGTGCATGTGCATGTG-----                                                                            | mirL    | 26  | 18    |
| -----CTTGTGTGTGCATGTGCATGTGT-----                                                                            | mirL    | 23  | 11    |
| -----CTTGTGTGTGCATGTGCATGTGTG-----                                                                           | mirL    | 25  | 10    |
| -----TCTTGTGTGTGCATGTGCATGTGTG-----                                                                          | mirL    | 25  | 7     |
| -----GTTCTTGTGTGTGCATGTGCATG-----                                                                            | mirL    | 23  | 5     |
| -----CTTGTGTGTGCATGTGCATGTGTG-----                                                                           | mirL    | 24  | 3     |
| -----GTTCTTGTGTGTGCATGTGC-----                                                                               | mirL    | 20  | 2     |
| -----CTTGTGTGTGCATGTGCAT-----                                                                                | mirL    | 19  | 2     |
| -----TCTTGTGTGTGCATGTGCATGTGTAT-----                                                                         | mirL    | 28  | 2     |
| -----TTCTTGTGTGTGCATGTGCATGT-----                                                                            | mirL    | 23  | 2     |
| -----GTTCTTGTGTGTGCATGTGCAT-----                                                                             | mirL    | 22  | 1     |
| -----TCTTGTGTGTGCATGTGCATGTGTGTA-----                                                                        | mirL    | 27  | 1     |
| -----TACATACACATACACACGCA-----                                                                               | mirR    | 22  | 876   |
| -----TACATACACATACACACGC-----                                                                                | mirR    | 21  | 231   |

```
-----ATACATACACACATACACACGG-----mirR 22 136
-----ATATACATACACACATACACACG-----mirR 23 104
-----ATATACATACACACATACACAC-----mirR 22 94
-----CATACACACATACACACGCACG-----mirR 22 77
-----ACATACACACATACACACGCA-----mirR 21 73
-----TACATACACACATACACACGCAC-----mirR 23 70
-----ATACACACATACACACGCACGT-----mirR 22 51
-----ATATACATACACACATACAC-----mirR 20 31
-----TACATACACACATACACA-----mirR 18 28
-----ATACATACACACATACACACG-----mirR 21 26
-----TACATACACACATACACACG-----mirR 20 21
-----ATACATACACACATACACA-----mirR 19 19
-----ATACATACACACATACACACGCA-----mirR 23 18
-----CATACACACATACACACGCAC-----mirR 21 18
-----CATACACACATACACACGCACGT-----mirR 23 15
-----TATACATACACACATACACA-----mirR 20 15
-----ACATACACACATACACACGCAC-----mirR 22 13
-----TATACATACACACATACACACG-----mirR 22 13
-----TATACATACACACATACACAC-----mirR 21 12
-----ATATACATACACACATACACA-----mirR 21 12
-----TACATACACACATACACAC-----mirR 19 12
-----CATACACACATACACACGCA-----mirR 20 11
-----ACATACACACATACACAC-----mirR 18 11
-----ACATACACACATACACACGCG-----mirR 20 11
-----TATACATACACACATACAC-----mirR 19 11
-----TACATACACACATACACACGCACG-----mirR 24 8
-----ATACATACACACATACAC-----mirR 18 7
-----ATACATACACACATACACAC-----mirR 20 7
-----ATACACACATACACACGCA-----mirR 19 7
-----ATACACACATACACACGC-----mirR 18 6
-----ATACACACATACACACGCAC-----mirR 20 6
-----ATATACATACACACATACA-----mirR 19 5
-----TATACATACACACATACA-----mirR 18 4
-----ATACATACACACATACACACGCAC-----mirR 24 4
-----ATACACACATACACACGCACGTA-----mirR 23 4
-----ATACACACATACACACGCACGTAC-----mirR 24 3
-----TATACATACACACATACACACGC-----mirR 23 3
-----ATATACATACACACATACACACGC-----mirR 24 3
-----ATACACACATACACACGCACG-----mirR 21 3
-----TATACATACACACATACACACGCA-----mirR 24 2
-----ACATACACACATACACACG-----mirR 19 1
-----CATACACACATACACACGCACGTA-----mirR 24 1
-----ACATACACACATACACACGCACG-----mirR 23 1
-----CATACACACATACACACGC-----mirR 19 1
-----CGTACACACACACAAACACA-----morR 20 17
-----CGTACACACACACAAACACACATA-----morR 26 12
```

```
-----CGTACACACACACAAAACACACAC----- morR 23 9
-----GTACACACACACAAAACACACAC----- morR 22 9
-----GTACACACACACAAAACAC----- morR 18 8
-----GTACACACACACAAAACACA----- morR 19 4
-----ACGTACACACACACAAAAC----- morR 18 4
-----CGTACACACACACAAAACA----- morR 18 3
-----ACACACACACAAAACACAC----- morR 18 3
-----CGTACACACACACAAAACAC----- morR 19 3
-----ACGTACACACACACAAAACACAC----- morR 22 3
-----CGTACACACACACAAAACACACA----- morR 22 2
-----TACACACACACAAAACACA----- morR 18 2
-----CACGTACACACACACAAAAC----- morR 19 2
-----CGTACACACACACAAAACACACATACA morR 28 2
-----TACACACACACAAAACACACAC----- morR 21 2
-----ACACACACACAAAACACACA----- morR 19 1
-----ACGTACACACACACAAAACACACA----- morR 23 1
-----ACGTACACACACACAAAACAC----- morR 20 1
-----ACGTACACACACACAAAACACA----- morR 21 1
-----GCACGTACACACACACAAAACAC----- morR 22 1
-----CACGTACACACACACAAAACACA----- morR 22 1
-----ACACACACACAAAACACACACA----- morR 21 1
-----CACGTACACACACACAAAACAC----- morR 21 1
-----ACGTACACACACACAAAACA----- morR 19 1
```

>mmu-mir-466f-4

```
TGTGTGCATCTGCATCTGTGTGTCTACGTGTGTGTGCATGTGCATGTGTGTGTATCTGTATGTGAGTGTGTGCATGCATGTGTGTGCATCTATATCTGTGTGTCTACTTGTGTGTGAATGTGCATATGTGTATGTATGTGA
-----GCATCTGCATCTGTGTGT-----
TGTGTGCATCTGCATCTGTGTGT-----
-----TGCATCTGTGTGTCTACG-----
-----CATCTGCATCTGTGTGTCTAC-----
-----ATCTGCATCTGTGTGTCTAC-----
-----ATCTGCATCTGTGTGTCTA-----
-----ATCTGCATCTGTGTGTCT-----
-----ACGTGTGTGTGCATGTGCATGT-----
-----ACGTGTGTGTGCATGTGCATGTGT-----
-----ACGTGTGTGTGCATGTGCATG-----
-----ACGTGTGTGTGCATGTGCATGTG-----
-----ACGTGTGTGTGCATGTGCAT-----
-----CGTGTGTGTGCATGTGCATGTGT-----
-----TACGTGTGTGTGCATGTGCATG-----
-----ACGTGTGTGTGCATGTGCA-----
-----CGTGTGTGTGCATGTGCATGTG-----
-----TACGTGTGTGTGCATGTGCAT-----
-----ACGTGTGTGTGCATGTGCATGTGTG-----
-----CTACGTGTGTGTGCATGT-----
-----CGTGTGTGTGCATGTGCATGT-----
```





```

-----GGTGTGAGGTTGGGCCAGG----- mirL 19 4
-----CTGGTGTGAGGTTGGGCCA----- mirL 19 4
-----GTGTGAGGTTGGGCCAGGA----- mirL 19 4
-----GCTGGTGTGAGGTTGGGC----- mirL 18 4
-----GGTGTGAGGTTGGGCCAGGATGA----- mirL 23 3
-----GCTGGTGTGAGGTTGGGCCA----- mirL 20 2
-----TGTGAGGTTGGGCCAGGATGA----- mirL 21 2
-----GGTGTGAGGTTGGGCCAG----- mirL 18 1
-----TGAAACCCAAGGCTCTCC----- loop 18 5
-----ATGAAACCCAAGGCTCTC----- loop 18 1
-----CGAGGCTCCCCACCACACCCTG----- mirR 22 329
-----CGAGGCTCCCCACCACACCCTGC----- mirR 23 183
-----TCCGAGGCTCCCCACCACACCCTGC----- mirR 25 126
-----TCCGAGGCTCCCCACCACACCCTG----- mirR 24 75
-----TCCGAGGCTCCCCACCACACCCT----- mirR 23 33
-----TCCGAGGCTCCCCACCACACC----- mirR 22 17
-----CGAGGCTCCCCACCACACCCTGCT----- mirR 24 17
-----CGAGGCTCCCCACCACACCCT----- mirR 21 15
-----TCCGAGGCTCCCCACCACACC----- mirR 21 13
-----CCGAGGCTCCCCACCACACCCTG----- mirR 23 10
-----CCGAGGCTCCCCACCACACCCTGC----- mirR 24 8
-----TCCGAGGCTCCCCACCACAC----- mirR 20 7
-----TCCGAGGCTCCCCACCACA----- mirR 19 7
-----AGGCTCCCCACCACACC----- mirR 18 6
-----CGAGGCTCCCCACCACACC----- mirR 19 4
-----CTCCGAGGCTCCCCACCACACCCTGC----- mirR 26 4
-----CGAGGCTCCCCACCACACCCTGCTG----- mirR 25 3
-----AGGCTCCCCACCACACCCT----- mirR 19 3
-----CCGAGGCTCCCCACCACACCCT----- mirR 22 2
-----GAGGCTCCCCACCACACC----- mirR 18 2
-----CGAGGCTCCCCACCACAC----- mirR 18 1
-----CTGCTGCTGAAGACTGCCTAGC morR 22 2
-----GCTGCTGAAGACTGCCTA-- morR 18 2
-----CTGCTGCTGAAGACTGCC---- morR 18 1

>mmu-mir-1970
GTGCATTGTTGGAGGAAATGTGTCCTACTGGGGATAGGCTTTGAGGTTTCAGAAGCTCAGTCAGGCCTAGTGGCACTCACTCTTCTGTTGCTGCAGATCCTTCTGC species len reads
---CATTGTTGGAGGAAATGT----- morL 18 2
GTGCATTGTTGGAGGAAA----- morL 18 1
-----TGTGTCCTACTGGGGATAGGCTTTG----- mirL 23 1885
-----TGTGTCCTACTGGGGATAGGCTTT----- mirL 22 196
-----TGTGTCCTACTGGGGATAGGCTTTGA----- mirL 24 61
-----GTGTCCTACTGGGGATAGGCTTTG----- mirL 22 53
-----TGTGTCCTACTGGGGATAGGCTTT----- mirL 21 40
-----GTCCTACTGGGGATAGGCTTTG----- mirL 20 31
-----TGTCCTACTGGGGATAGGCTTTG----- mirL 21 28

```

```

-----TGTGTCCTGGGGATAGGCT----- mirL 20 17
-----TGTCCTGGGGATAGGCTTT----- mirL 20 13
-----TGTGTCCTGGGGATAGGC----- mirL 19 9
-----GTGTCCTGGGGATAGGCTTT----- mirL 21 6
-----GTGTCCTGGGGATAGGCTT----- mirL 20 5
-----TGTGTCCTGGGGATAGGCTTTGAGGT----- mirL 27 5
-----ATGTGTCCTGGGGATAGGCTTTG----- mirL 24 5
-----ATGTGTCCTGGGGATAGGCTTT----- mirL 23 3
-----AAATGTGTCCTGGGGAT----- mirL 18 2
-----ATGTGTCCTGGGGATAGG----- mirL 19 2
-----GTGTCCTGGGGATAGGCT----- mirL 19 2
-----GTGTCCTGGGGATAGGC----- mirL 18 1
-----AATGTGTCCTGGGGATA----- mirL 18 1
-----                                CACTCACTCTTCCTGTTG----- mirR 18 6
-----                                TGGCACTCACTCTTCCTG----- mirR 18 2
-----                                GCCTGCAGATCCTTCTGC morR 18 4

```

>mmu-mir-688

```

CGAAAGGGCAGTGAAGAAAAGTAGGGCTTGCTTGGGGAGAGCACCTCGCAGGCGACTACTTATTCCAGCTCGCCCCCAGCAAGTCCGA species len reads
-GAAAGGGCAGTGAAGAAA----- morL 18 8
---AAGGGCAGTGAAGAAAAG----- morL 18 3
---AGGGCAGTGAAGAAAAGT----- morL 18 2
-GAAAGGGCAGTGAAGAAA----- morL 19 1
---GGGCAGTGAAGAAAAGTA----- morL 18 1
CGAAAGGGCAGTGAAGAAA----- morL 19 1
---AGGGGCTTGCTTGGGGAG----- mirL 18 11
---GGGGCTTGCTTGGGGAGA----- mirL 18 2
---GTAGGGCTTGCTTGGGGA----- mirL 19 1
-----TCGCAGGCGACTACTTATTC----- mirR 20 1209
-----TCGCAGGCGACTACTTATT----- mirR 19 806
-----TCGCAGGCGACTACTTAT----- mirR 18 220
-----TCGCAGGCGACTACTTATTCC----- mirR 21 28
-----CGCAGGCGACTACTTATTC----- mirR 19 17
-----GCAGGCGACTACTTATTC----- mirR 18 15
-----CGCAGGCGACTACTTATT----- mirR 18 13
-----TCGCAGGCGACTACTTATTCCAG----- mirR 23 12
-----TCGCAGGCGACTACTTATTCCA----- mirR 22 3
-----TCGCAGGCGACTACTTATTCCAGC----- mirR 24 3
-----ACCTCGCAGGCGACTACTTAT----- mirR 21 1
-----CCAGCTCGCCCCCAGCAAGTCCGA morR 25 6
-----CCAGCTCGCCCCCAGCA----- morR 18 1
-----AGCTCGCCCCCAGCAAG----- morR 18 1
-----CAGCTCGCCCCCAGCAA----- morR 18 1
-----CCAGCTCGCCCCCAGCAA----- morR 19 1

```

>mmu-mir-743a

|                                                                                            | species | len | reads |
|--------------------------------------------------------------------------------------------|---------|-----|-------|
| TTCTTGATGCAGTGCTGTATTAGATTGGTGCCTGTCATGTTTATAAGAATGAAAGACACCAAGCTGAGTAGAGTAGGGCTTATTGTGTTC | morL    | 19  | 1     |
| TTCTTGATGCAGTGCTGT-----TATTAGATTGGTGCCTGTCATG-----                                         | mirL    | 23  | 533   |
| -----ATTCAGATTGGTGCCTGTCATG-----                                                           | mirL    | 22  | 17    |
| -----TTCAGATTGGTGCCTGTCATG-----                                                            | mirL    | 21  | 16    |
| -----TATTAGATTGGTGCCTGTCA-----                                                             | mirL    | 21  | 15    |
| -----TATTAGATTGGTGCCTGTCAT-----                                                            | mirL    | 22  | 8     |
| -----TCAGATTGGTGCCTGTCATG-----                                                             | mirL    | 20  | 1     |
| -----CTGTATTAGATTGGTGCCT-----                                                              | mirL    | 20  | 1     |
| -----TATTAGATTGGTGCCTGT-----                                                               | mirL    | 19  | 1     |
| -----TATTAGATTGGTGCCTG-----                                                                | mirL    | 18  | 1     |
| -----AAAGACACCAAGCTGAGTAGA-----                                                            | mirR    | 21  | 517   |
| -----GAAAGACACCAAGCTGAGTAGA-----                                                           | mirR    | 22  | 380   |
| -----AAAGACACCAAGCTGAGTAG-----                                                             | mirR    | 20  | 270   |
| -----GAAAGACACCAAGCTGAGTAG-----                                                            | mirR    | 21  | 185   |
| -----AGACACCAAGCTGAGTAGA-----                                                              | mirR    | 19  | 118   |
| -----GACACCAAGCTGAGTAGA-----                                                               | mirR    | 18  | 92    |
| -----AGACACCAAGCTGAGTAG-----                                                               | mirR    | 18  | 55    |
| -----AAAGACACCAAGCTGAGTA-----                                                              | mirR    | 19  | 29    |
| -----AAGACACCAAGCTGAGTAGA-----                                                             | mirR    | 20  | 24    |
| -----GAAAGACACCAAGCTGAGTA-----                                                             | mirR    | 20  | 22    |
| -----AAAGACACCAAGCTGAGT-----                                                               | mirR    | 18  | 18    |
| -----GAAAGACACCAAGCTGAGTAGAG-----                                                          | mirR    | 23  | 10    |
| -----AAGACACCAAGCTGAGTAG-----                                                              | mirR    | 19  | 9     |
| -----GAAAGACACCAAGCTGAGT-----                                                              | mirR    | 19  | 5     |
| -----GAAAGACACCAAGCTGAG-----                                                               | mirR    | 18  | 4     |
| -----AAAGACACCAAGCTGAGTAGAG-----                                                           | mirR    | 22  | 1     |
| -----TGAAAGACACCAAGCTGAG-----                                                              | mirR    | 19  | 1     |
| -----GTAGGGCTTATTGTGTTC                                                                    | morR    | 18  | 2     |
| <br>                                                                                       |         |     |       |
| >mmu-mir-2137                                                                              |         |     |       |
| TTTCCACGTAGTATACCTCCTTCTGCTGCCTTGTGGCTTGCCGGCGGGAGCCCCAGGGAGTAGAGCATTGCAGACAGGCCAC         | species | len | reads |
| --TCCACGTAGTATACCTCCT-----                                                                 | morL    | 20  | 3     |
| --TCCACGTAGTATACCTCCT-----                                                                 | morL    | 19  | 2     |
| ---CCACGTAGTATACCTCCT-----                                                                 | morL    | 18  | 1     |
| TTTCCACGTAGTATACCT-----                                                                    | morL    | 18  | 1     |
| ---CCACGTAGTATACCTCCT-----                                                                 | morL    | 19  | 1     |
| -----CTTCTGCTGCCTTGTG-----                                                                 | mirL    | 18  | 7     |
| -----TCCTTCTGCTGCCTGT-----                                                                 | mirL    | 18  | 1     |
| -----CTCTTCTGCTGCCTGT-----                                                                 | mirL    | 19  | 1     |
| -----GCCGGCGGGAGCCCCAGGGA-----                                                             | mirR    | 20  | 984   |
| -----GCCGGCGGGAGCCCCAGGGAG-----                                                            | mirR    | 21  | 642   |
| -----CGGCGGGAGCCCCAGGGA-----                                                               | mirR    | 18  | 125   |
| -----GGCGGGAGCCCCAGGGAG-----                                                               | mirR    | 18  | 105   |
| -----GCCGGCGGGAGCCCCAGG-----                                                               | mirR    | 18  | 98    |
| -----CGGCGGGAGCCCCAGGGAG-----                                                              | mirR    | 19  | 97    |

```

-----CCGGCGGGAGCCCCAGGGA----- mirR 19 88
-----CCGGCGGGAGCCCCAGGGAG----- mirR 20 61
-----GCCGGCGGGAGCCCCAGGG----- mirR 19 51
-----GCCGGCGGGAGCCCCAGGGAGT----- mirR 22 12
-----GGCGGGAGCCCCAGGGAGT----- mirR 19 10
-----GGCGGGAGCCCCAGGGAGTA----- mirR 20 6
-----CGGCGGGAGCCCCAGGGAGT----- mirR 20 5
-----CCGGCGGGAGCCCCAGGG----- mirR 18 4
-----GCCGGCGGGAGCCCCAGGGAGTA----- mirR 23 3
-----GGCGGGAGCCCCAGGGAGTAG----- mirR 21 3
-----CCGGCGGGAGCCCCAGGGAGT----- mirR 21 3
-----CGGCGGGAGCCCCAGGGAGTAG----- mirR 22 2
-----CGGCGGGAGCCCCAGGGAGTA----- mirR 21 2
-----GCCGGCGGGAGCCCCAGGGAGTAG----- mirR 24 1
-----CCGGCGGGAGCCCCAGGGAGTA----- mirR 22 1
-----TAGAGCATTGCAGACAGGCCA----- morR 21 2
-----AGTAGAGCATTGCAGACA----- morR 18 1
-----TAGAGCATTGCAGACAGGCCAC----- morR 22 1
-----GAGTAGAGCATTGCAGAC----- morR 18 1

```

>mmu-mir-466c-2

```

CCTACGTATGTGTATATGTGTTGATGTGTGTGTCATGTACATATGTGAATATGATATACATATACATACACGCACACATAAGACACATATGAGCACACAGAGACAGGGGAATGGCACTCGTCAATCCAT species 1
CCTACGTATGTGTATATGTGTT----- morL 22 2
--TACGTATGTGTATATGTGT----- morL 19 2
--TACGTATGTGTATATGTGTT----- morL 20 1
--TACGTATGTGTATATGTG----- morL 18 1
-----GATGTGTGTGTGTCATGTACATAT----- mirL 23 79
-----GATGTGTGTGTGTCATGTACAT----- mirL 21 51
-----TGATGTGTGTGTGTCATGTACATAT----- mirL 24 24
-----TGATGTGTGTGTGTCATGTACAT----- mirL 22 18
-----GATGTGTGTGTGTCATGTACATA----- mirL 22 15
-----GATGTGTGTGTGTCATGTACA----- mirL 20 12
-----TGATGTGTGTGTGTCATGTACA----- mirL 21 58
-----GATGTGTGTGTGTCATGTACATATG----- mirL 24 54
-----GATGTGTGTGTGTCATGTAC----- mirL 19 47
-----TGATGTGTGTGTGTCATGTAC----- mirL 20 31
-----GATGTGTGTGTGTCATGTATA----- mirL 18 25
-----TGATGTGTGTGTGTCATGTACATA----- mirL 23 25
-----TGATGTGTGTGTGTCATGT----- mirL 18 15
-----TGATGTGTGTGTGTCATGTATA----- mirL 19 11
-----ATGTGTGTGTGTCATGTACATAT----- mirL 22 8
-----TGTGTGTGTGTCATGTACATAT----- mirL 21 5
-----GTGTGTGTGTCATGTACATAT----- mirL 20 5
-----GTGTGTGTGTCATGTACATA----- mirL 19 3
-----GTGTGTGTGTCATGTACAT----- mirL 18 3
-----ATGTGTGTGTGTCATGTACA----- mirL 19 2

```

C:\Documents and Settings\hong\Desktop\Reprogramming-total RNA.txt

```
-----ATGTGTGTGTGCATGTACATA----- mirL 21 1
-----ATGTGTGTGTGCATGTAC----- mirL 18 1
-----TGTGTGTGTGCATGTACATA----- mirL 20 1
-----TTGATGTGTGTGTGCATGTA----- mirL 20 1
-----GGAATGGCACTCGTCAATC--- mirR 19 4
-----GGAATGGCACTCGTCAAT--- mirR 18 2
-----AATGGCACTCGTCAATCCAT mirR 20 1
```

>mmu-mir-695

```
AGAAAACTTCACGAGGAATCCTAGATTGGGCATAGGTGACTGAAGTACACAGCTGCCTTCTTACAAAGGCACTGGTTACCTTGGTCCTGGTCCCGGCTCGGCTATCTGCTACTCGGTGGAACACCCCCAGCAATCTCA
---AAACTTCACGAGGAATC-----
---ACTTCACGAGGAATCCTAG-----
AGAAAACTTCACGAGGAATC-----
-----AGATTGGGCATAGGTGACTGAA-----
-----AGATTGGGCATAGGTGACTGA-----
-----AGATTGGGCATAGGTGACTG-----
-----AGATTGGGCATAGGTGACT-----
-----GATTGGGCATAGGTGACTGA-----
-----GATTGGGCATAGGTGACTGAA-----
-----AGATTGGGCATAGGTGACTGAC-----
-----ATTGGGCATAGGTGACTGA-----
-----AGATTGGGCATAGGTGACTGAAG-----
-----TTGGGCATAGGTGACTGAA-----
-----AGATTGGGCATAGGTGACTGAAGTACACA-----
-----TAGATTGGGCATAGGTGACTGAA-----
-----CCCCCAGCAATCTCA-----
-----CCCCCAGCAATCTCA-----
-----ACACCCCCAGCAATCTCA-----
-----CCAGCAATCTCA-----
-----CCAGCAATCTCA-----
-----CCCCCAGCAATCTCA-----
-----CCCCCAGCAATCTCA-----
-----ACCCCCAGCAATCTCA-----
```

>mmu-mir-466c-1

```
CCCTATGTATGTGTATATGTGTTGATGTGTGTGTGCATGTACATATGTGAATATGATATACATATACATACACGCACACATAAGACACATATGAGCACACAGACACAGGGGAATGGC species len reads
CCCTATGTATGTGTATATGTGTTGAT----- morL 26 1
-----GATGTGTGTGTGCATGTACATAT----- mirL 23 795
-----GATGTGTGTGTGCATGTACAT----- mirL 21 518
-----TGATGTGTGTGTGCATGTACATAT----- mirL 24 240
-----TGATGTGTGTGTGCATGTACAT----- mirL 22 180
-----GATGTGTGTGTGCATGTACATA----- mirL 22 158
```

```

-----GATGTGTGTGTGCATGTACA----- mirL 20 123
-----TGATGTGTGTGTGCATGTACA----- mirL 21 58
-----GATGTGTGTGTGCATGTACATATG----- mirL 24 54
-----GATGTGTGTGTGCATGTAC----- mirL 19 47
-----TGATGTGTGTGTGCATGTAC----- mirL 20 31
-----TGATGTGTGTGTGCATGTACATA----- mirL 23 25
-----GATGTGTGTGTGCATGTA----- mirL 18 25
-----TGATGTGTGTGTGCATGT----- mirL 18 15
-----TGATGTGTGTGTGCATGTA----- mirL 19 11
-----ATGTGTGTGTGTGCATGTACATAT----- mirL 22 8
-----TGTGTGTGTGTGCATGTACATAT----- mirL 21 5
-----GTGTGTGTGTGCATGTACATAT----- mirL 20 5
-----GTGTGTGTGTGCATGTACAT----- mirL 18 3
-----GTGTGTGTGTGCATGTACATA----- mirL 19 3
-----ATGTGTGTGTGTGCATGTACA----- mirL 19 2
-----TGTGTGTGTGTGCATGTACATA----- mirL 20 1
-----ATGTGTGTGTGTGCATGTAC----- mirL 18 1
-----ATGTGTGTGTGTGCATGTACATA----- mirL 21 1
-----TTGATGTGTGTGTGCATGTA----- mirL 20 1
-----CACACAGACACAGGGGAA----- mirR 18 3
-----CACAGACACAGGGGAATGG----- mirR 19 1
-----GCACACAGACACAGGGGAATGGC mirR 23 1
-----GCACACAGACACAGGGGA----- mirR 18 1
-----AGCACACAGACACAGGGGAAT--- mirR 21 1
-----AGCACACAGACACAGGGG----- mirR 18 1
-----ACACAGACACAGGGGAATGGC mirR 21 1

```

>mmu-mir-669c

```

TGTATAGTTGTGTGTGGATGTGTGATTTGCATATAAATAACATACACACACACACAAGTAAACACAAGTGCACAAA species len reads
---ATAGTTGTGTGTGGATGTGTGT----- mirL 22 942
---ATAGTTGTGTGTGGATGTGTGTAT----- mirL 24 601
---ATAGTTGTGTGTGGATGTGTG----- mirL 21 191
---AGTTGTGTGTGGATGTGTGTAT----- mirL 22 89
---ATAGTTGTGTGTGGATGTGT----- mirL 20 75
---ATAGTTGTGTGTGGATGT----- mirL 18 64
---AGTTGTGTGTGGATGTGTGT----- mirL 20 42
---ATAGTTGTGTGTGGATGTG----- mirL 19 31
---ATAGTTGTGTGTGGATGTGTGATTT----- mirL 25 25
---AGTTGTGTGTGGATGTGTGATTT----- mirL 23 13
---AGTTGTGTGTGGATGTGTGTA----- mirL 21 12
---GTTGTGTGTGGATGTGTGTAT----- mirL 21 7
---AGTTGTGTGTGGATGTGTGATTT----- mirL 24 6
---TAGTTGTGTGTGGATGTGTGTAT----- mirL 23 5
---TATAGTTGTGTGTGGATGTGTGT----- mirL 23 4
---GTTGTGTGTGGATGTGTGT----- mirL 19 3
---AGTTGTGTGTGGATGTGTGATTTG----- mirL 25 3

```

```

--TATAGTTGTGTGGATGT----- mirL 19 3
---TAGTTGTGTGGATGTGTGT----- mirL 21 3
---TAGTTGTGTGGATGTGTATTT----- mirL 25 2
----GTTGTGTGGATGTGTGTA----- mirL 20 1
-GTATAGTTGTGTGGATGT----- mirL 20 1
TGTATAGTTGTGTGGATGT----- mirL 21 1
----GTTGTGTGGATGTGTG----- mirL 18 1
---TAGTTGTGTGGATGTGT----- mirL 19 1
TGTATAGTTGTGTGGATGTGTAT----- mirL 27 1
--TATAGTTGTGTGGATGTGTAT----- mirL 25 1
-----AATAACATACACACACACAC----- mirR 22 29
-----AAATAACATACACACACACAC----- mirR 21 16
-----AATAACATACACACACACAC----- mirR 20 13
-----ATAACATACACACACACACACA----- mirR 22 10
-----AAATAACATACACACACACACA----- mirR 22 9
-----ATAACATACACACACACACAC----- mirR 21 8
-----AATAACATACACACACACACA----- mirR 21 8
-----AAATAACATACACACACACA----- mirR 18 5
-----AATAACATACACACACACAC----- mirR 18 3
-----AAATAACATACACACACACAC----- mirR 19 3
-----TAACATACACACACACACAC----- mirR 20 2
-----AAATAACATACACACACACACAC----- mirR 23 2
-----AATAACATACACACACACACACA----- mirR 23 2
-----AACATACACACACACACACAAA----- mirR 21 2
-----AATAACATACACACACACA----- mirR 19 1
-----TAACATACACACACACACACA----- mirR 21 1
-----AACATACACACACACACACAC----- mirR 19 1
-----AATAACATACACACACACACAAA----- mirR 24 1
-----TAAACACAAGTGCACAAA morR 18 12
-----GTAAACACAAGTGCACAAA morR 19 1
-----GTAAACACAAGTGCACAAA morR 18 1
-----AAGTAAACACAAGTGCAC morR 18 1
-----AGTAAACACAAGTGCACA morR 18 1

```

>mmu-mir-1896

```

GAGGTCAAGCTGAAGGCTTTCCACACTCATTACAGTGATGTCTTTTGGAAACGACCATGGACTCTCTGATGGTGGGTGAGGAGGAGGGCCCGACTAAAGGTTT species len reads
GAGGTCAAGCTGAAGGCTTTC----- morL 21 1
GAGGTCAAGCTGAAGGCTTT----- morL 20 1
-----TCCCACACTCATTACAGT----- mirL 18 7
-----CTTTCCACACTCATTAC----- mirL 18 1
-----TTCCCACACTCATTACAG----- mirL 18 1
-----TTCCCACACTCATTACAGT----- mirL 19 1
-----CTCTCTGATGGTGGGTGAGGAG----- mirR 22 1654
-----CTCTCTGATGGTGGGTGAGGA----- mirR 21 204
-----TCTCTGATGGTGGGTGAGGAG----- mirR 21 138
-----CTCTCTGATGGTGGGTGAG----- mirR 19 57

```



```

-----CTCTGATGGTGGGTGAGGAG----- mirR 20 51
-----CTCTCTGATGGTGGGTGA----- mirR 18 39
-----TCTGATGGTGGGTGAGGAG----- mirR 19 22
-----CTCTCTGATGGTGGGTGAGGAG----- mirR 23 20
-----TCTCTGATGGTGGGTGAGGA----- mirR 20 16
-----ACTCTCTGATGGTGGGTGAGGAG----- mirR 23 7
-----CTCTCTGATGGTGGGTGAGG----- mirR 20 7
-----TCTCTGATGGTGGGTGAGG----- mirR 19 2
-----TCTCTGATGGTGGGTGAG----- mirR 18 1
-----TCTGATGGTGGGTGAGGAGGA----- mirR 21 1
-----ACTCTCTGATGGTGGGTGAGGA----- mirR 22 1
-----GGACTCTCTGATGGTGGGTGAGGAG----- mirR 25 1
-----ACTCTCTGATGGTGGGTGA----- mirR 19 1
-----GGACTCTCTGATGGTGGG----- mirR 18 1
-----GGCCCGACTAAAGGTTT morR 18 1
-----AGGAGGGCCCGACTAAAGG--- morR 19 1
-----GAGGAGGGCCCGACTAAA----- morR 18 1

```

>mmu-mir-653

```

TTCTGAGATTTTCATTCTTTTCAGTGTGAAACAATCTCTACTGAACCAAGCTCCAAAGCGAGTTCCTGAGTTTGTTCAGTATTGCAGGAGTGCTAAGTGTGAAG species len reads
---TGAGATTTTCATTCTTTCA----- morL 18 2
---AGATTTTCATTCTTTTCAGTG----- morL 19 1
TTCTGAGATTTTCATTCTT----- morL 18 1
---GAGATTTTCATTCTTTTCAG----- morL 18 1
---AGATTTTCATTCTTTTCAGT----- morL 18 1
-----GTGTTGAAACAATCTCTACTG----- mirL 21 711
-----GTGTTGAAACAATCTCTACT----- mirL 20 511
-----TTGAAACAATCTCTACTGAAC----- mirL 21 338
-----TTGAAACAATCTCTACTGAA----- mirL 20 235
-----TTGAAACAATCTCTACTGAACC----- mirL 22 174
-----GTGTTGAAACAATCTCTAC----- mirL 19 86
-----TTGAAACAATCTCTACTGA----- mirL 19 44
-----GTGTTGAAACAATCTCTA----- mirL 18 30
-----TTGAAACAATCTCTACTG----- mirL 18 13
-----TTGAAACAATCTCTACTGAACCA----- mirL 23 10
-----GTTGAAACAATCTCTACTG----- mirL 19 7
-----GTTGAAACAATCTCTACTGAAC----- mirL 22 7
-----TGTGAAACAATCTCTACT----- mirL 19 7
-----TGTGAAACAATCTCTACTG----- mirL 20 3
-----GTGTTGAAACAATCTCTACTGAAC----- mirL 24 2
-----GTGTTGAAACAATCTCTACTGA----- mirL 22 1
-----TCAGTGTGAAACAATCT----- mirL 18 1
-----GTTGAAACAATCTCTACT----- mirL 18 1
-----AGTGTGAAACAATCTCTACTG----- mirL 22 1
-----GAGTTTGTTCAGTATTG----- mirR 18 11
-----GGAGTTTGTTCAGTATT----- mirR 18 3

```

```

-----GAGTTTGTTCAGTATTGC----- mirR 19 3
-----AGTTTGTTCAGTATTGC----- mirR 18 2
-----GAGTTTGTTCAGTATTGCA----- mirR 20 1
-----TGGAGTTTGTTCAGTAT----- mirR 18 1
-----CAGGAGTGCTAAGTGTGA-- morR 18 1
-----GGAGTGCTAAGTGTGAAG morR 18 1

```

>mmu-mir-452

```

GCTAAGCAGTTACAACGTGTTTGCAGAGGAACTGAGACTTTATAACTATGTCTCAGTCTCATCTGCAAAGAGGTAAGTGCTTTGCCAAGCCCCT species len reads
GCTAAGCAGTTACAACGTG----- morL 18 1
-----TGTTTGCAGAGGAACTGAGAC----- mirL 22 545
-----AACTGTTTGCAGAGGAACTGA----- mirL 22 412
-----AACTGTTTGCAGAGGAACTGAGA----- mirL 24 224
-----TGTTTGCAGAGGAACTGAGA----- mirL 21 216
-----TGTTTGCAGAGGAACTGAG----- mirL 20 75
-----AACTGTTTGCAGAGGAACTGAG----- mirL 23 75
-----AACTGTTTGCAGAGGAACTG----- mirL 21 42
-----AACTGTTTGCAGAGGAACTGAGAC----- mirL 25 34
-----TTGCAGAGGAACTGAGAC----- mirL 19 25
-----TGTTTGCAGAGGAACTGA----- mirL 19 22
-----GTTTGCAGAGGAACTGAGAC----- mirL 21 21
-----GTTTGCAGAGGAACTGAGA----- mirL 20 17
-----CTGTTTGCAGAGGAACTGA----- mirL 20 16
-----GTTTGCAGAGGAACTGAG----- mirL 19 14
-----ACTGTTTGCAGAGGAACTGA----- mirL 21 12
-----AACTGTTTGCAGAGGAACTGAGACT----- mirL 26 12
-----TTTGCAGAGGAACTGAGACTT----- mirL 22 11
-----ACTGTTTGCAGAGGAAAC----- mirL 18 10
-----CTGTTTGCAGAGGAACTGAGA----- mirL 22 10
-----AACTGTTTGCAGAGGAACT----- mirL 20 9
-----GTTTGCAGAGGAACTGA----- mirL 18 4
-----ACTGTTTGCAGAGGAACTG----- mirL 20 4
-----ACTGTTTGCAGAGGAACT----- mirL 19 3
-----TGTTTGCAGAGGAACTGAGACT----- mirL 23 3
-----TTGCAGAGGAACTGAGA----- mirL 18 2
-----TGTTTGCAGAGGAACTG----- mirL 18 2
-----CTGTTTGCAGAGGAACTGAGAC----- mirL 23 1
-----CTGTTTGCAGAGGAACT----- mirL 18 1
-----CTGTTTGCAGAGGAACTG----- mirL 19 1
-----ACTGTTTGCAGAGGAACTGAG----- mirL 22 1
-----CTGTTTGCAGAGGAACTGAGACT----- mirL 24 1
-----TTTGCAGAGGAACTGAGAC----- mirL 20 1
-----ACTTTATAACTATGTCTCA----- loop 19 1
-----CTTTATAACTATGTCTCA----- loop 18 1
-----TCAGTCTCATCTGCAAAGAG----- mirR 21 115
-----TCAGTCTCATCTGCAAAGAG----- mirR 20 65

```

```

-----TCAGTCTCATCTGCAAAGAGGT----- mirR 22 44
-----TCAGTCTCATCTGCAAAGA----- mirR 19 31
-----TCAGTCTCATCTGCAAAG----- mirR 18 18
-----CTCAGTCTCATCTGCAAAGAGGT----- mirR 23 6
-----CAGTCTCATCTGCAAAGAG----- mirR 19 6
-----CAGTCTCATCTGCAAAGAGGT----- mirR 21 2
-----AGTCTCATCTGCAAAGAG----- mirR 18 2
-----TCAGTCTCATCTGCAAAGAGGTA----- mirR 23 1
-----CTCAGTCTCATCTGCAAAGAGGTA----- mirR 24 1
-----CTCAGTCTCATCTGCAAAG----- mirR 19 1
-----TCAGTCTCATCTGCAAAGAGGTAA----- mirR 24 1
-----AGTCTCATCTGCAAAGAGG----- mirR 19 1
-----CTCAGTCTCATCTGCAAAGA----- mirR 20 1
-----CAGTCTCATCTGCAAAGAGGTA----- mirR 22 1
-----GTCTCATCTGCAAAGAGG----- mirR 18 1
-----GGTAAGTGCTTTGCCAAG----- morR 18 4
-----GTGCTTTGCCAAGCCCCT morR 18 1
-----GTAAGTGCTTTGCCAAGC----- morR 18 1

```

>mmu-mir-491

```

TGGGAATTGACTTAGCTGGGAAGTGGGGAACCCTTCCATGAGGAGTAGAACACTCCTTATGCAAGATTCCCTTCTACCTGACTGAGTTGAAGTCA species len reads
-GGGAATTGACTTAGCTGGGA----- morL 20 2
TGGGAATTGACTTAGCTG----- morL 18 1
-----TTGACTTAGCTGGGAAGT----- morL 18 1
-GGGAATTGACTTAGCTGGGAA----- morL 21 1
-----AGTGGGGAACCCTTCCATG----- mirL 19 207
-----AGTGGGGAACCCTTCCATGA----- mirL 20 163
-----AGTGGGGAACCCTTCCATGAG----- mirL 22 146
-----AGTGGGGAACCCTTCCATGAG----- mirL 21 143
-----AGTGGGGAACCCTTCCATGAGGA----- mirL 23 84
-----AGTGGGGAACCCTTCCATGAGGAG----- mirL 24 50
-----AGTGGGGAACCCTTCCATGAGGAGT----- mirL 25 45
-----GTGGGGAACCCTTCCATG----- mirL 18 24
-----GTGGGGAACCCTTCCATGAG----- mirL 20 22
-----TGGGGAACCCTTCCATGAGGAGT----- mirL 23 10
-----TGGGGAACCCTTCCATGAG----- mirL 19 8
-----GTGGGGAACCCTTCCATGA----- mirL 19 6
-----GGGGAACCCTTCCATGAGG----- mirL 19 5
-----AAGTGGGGAACCCTTCCATGAG----- mirL 22 5
-----AAGTGGGGAACCCTTCCA----- mirL 18 5
-----TGGGGAACCCTTCCATGA----- mirL 18 4
-----AAGTGGGGAACCCTTCCATGAGGA----- mirL 24 3
-----GGAAGTGGGGAACCCTTC----- mirL 18 2
-----GAAGTGGGGAACCCTTCC----- mirL 18 2
-----GAAGTGGGGAACCCTTCCAT----- mirL 20 2
-----AAGTGGGGAACCCTTCCATGA----- mirL 21 1

```

```

-----GAAGTGGGGAACCCTTCCATG----- mirL 21 1
-----GAAGTGGGGAACCCTTCCATGA----- mirL 22 1
-----GGAAGTGGGGAACCCTTCCA----- mirL 20 1
-----GAGGAGTAGAACACTCCT----- loop 18 2
-----CTTATGCAAGATTCCCTTCTAC----- mirR 22 650
-----CTTATGCAAGATTCCCTTCTA----- mirR 21 307
-----CTTATGCAAGATTCCCTTCTACC----- mirR 23 42
-----CTTATGCAAGATTCCCTTCTACCT----- mirR 24 29
-----CTTATGCAAGATTCCCTTCT----- mirR 20 25
-----TTATGCAAGATTCCCTTCTAC----- mirR 21 22
-----TTATGCAAGATTCCCTTCTACC----- mirR 22 20
-----CTTATGCAAGATTCCCTTCTC----- mirR 19 16
-----ATGCAAGATTCCCTTCTA----- mirR 18 14
-----TTATGCAAGATTCCCTTCTA----- mirR 20 5
-----ATGCAAGATTCCCTTCTAC----- mirR 19 3
-----TATGCAAGATTCCCTTCTACCT----- mirR 22 2
-----TATGCAAGATTCCCTTCTA----- mirR 19 2
-----CTTATGCAAGATTCCCTTCTACCTG----- mirR 25 2
-----TTATGCAAGATTCCCTTCTACCT----- mirR 23 1
-----TTATGCAAGATTCCCTTCT----- mirR 19 1
-----TATGCAAGATTCCCTTCTAC----- mirR 20 1
-----TATGCAAGATTCCCTTCTACC----- mirR 21 1
-----CCTTATGCAAGATTCCCTTCTC----- mirR 20 1
-----TTATGCAAGATTCCCTTCTC----- mirR 18 1
-----TACCTGACTGAGTTGAAG--- morR 18 3
-----ACCTGACTGAGTTGAAGTCA morR 20 1
-----ACCTGACTGAGTTGAAGT-- morR 18 1
-----TACCTGACTGAGTTGAAGTC- morR 20 1

>mmu-mir-547
ACTCATGTAGTGTGTGATGTATCACTTGAGGATGTACCACCCATTTAACAGGAAACATGCTTGGTACATCTTTGAGTGAGATAACACACAACAGCTACCACCT species len reads
ACTCATGTAGTGTGTGATGTAT----- morL 22 4
ACTCATGTAGTGTGTGATGT----- morL 20 2
--TCATGTAGTGTGTGATGT----- morL 18 1
ACTCATGTAGTGTGTGAT----- morL 18 1
---CATGTAGTGTGTGATGTATCA----- morL 21 1
-----TCACTTGAGGATGTACCACCCA----- mirL 22 14
-----CACTTGAGGATGTACCACCCA----- mirL 21 9
-----TCACTTGAGGATGTACCACCC----- mirL 21 4
-----GTATCACTTGAGGATGTA----- mirL 18 1
-----CACTTGAGGATGTACCACCCAT----- mirL 22 1
-----CATTTAACAGGAAACATG----- loop 18 11
-----CTTGGTACATCTTTGAGTGA----- mirR 20 1030
-----CTTGGTACATCTTTGAGTG----- mirR 19 734
-----CTTGGTACATCTTTGAGTGAGA----- mirR 22 83
-----CTTGGTACATCTTTGAGT----- mirR 18 81

```

```
-----CTTGGTACATCTTTGAGTGAG----- mirR 21 55
-----TGGTACATCTTTGAGTGA----- mirR 18 23
-----CTTGGTACATCTTTGAGTGAGAT----- mirR 23 8
-----TTGGTACATCTTTGAGTGA----- mirR 19 7
-----GGTACATCTTTGAGTGAGA----- mirR 19 3
-----GCTTGGTACATCTTTGAGTGAGA----- mirR 23 2
-----TGCTTGGTACATCTTTGAGTGAG----- mirR 23 1
-----TGCTTGGTACATCTTTGAG----- mirR 19 1
-----TTGGTACATCTTTGAGTG----- mirR 18 1
-----TGCTTGGTACATCTTTGA----- mirR 18 1
-----ATGCTTGGTACATCTTTG----- mirR 18 1
-----TAACACACAACAGCTACCA--- morR 19 2
-----ATAACACACAACAGCTAC--- morR 18 1
-----TAACACACAACAGCTACCACCT morR 22 1
-----GAGATAACACACAACAGC----- morR 18 1
```

>mmu-mir-297b

```
CCCAATCTATTTGCTTGTGTATATGTATGTGTGCATGAACATGTGTATATGAATATACATATACATACACATACCCATACAAACATGCATACAAACACACAGAAAATGGATACTCATTGTTCTATTGAATGATATGT
-----TCTATTTGCTTGTGTGTAT-----
-----ATCTATTTGCTTGTGTGTAT-----
CCCAATCTATTTGCTTGTGTG-----
-----ATCTATTTGCTTGTGTGT-----
-----CTATTTGCTTGTGTGTATAT-----
-----TATTTGCTTGTGTGTATA-----
-----ATGTATGTGTGCATGAACATGT-----
-----ATGTATGTGTGCATGAACATGTGT-----
-----ATGTATGTGTGCATGAACATGTG-----
-----ATGTATGTGTGCATGAACATG-----
-----ATGTATGTGTGCATGAACATGTGA-----
-----ATGTATGTGTGCATGAACAT-----
-----TATGTATGTGTGCATGAACATGT-----
-----GTATGTGTGCATGAACATGT-----
-----GTATGTGTGCATGAACATGTGT-----
-----TATGTGTGCATGAACATGT-----
-----ATGTATGTGTGCATGAACATGTGTAT-----
-----ATATGTATGTGTGCATGAACATGT-----
-----GTATGTGTGCATGAACATG-----
-----TATGTATGTGTGCATGAACAT-----
-----GTATGTGTGCATGAACATGTG-----
-----ATATGTATGTGTGCATGAACAT-----
-----ATAATGTATGTGTGCATGAACATG-----
-----TGTATGTGTGCATGAACATGT-----
-----TGTATGTGTGCATGAACATGTG-----
-----TATGTATGTGTGCATGAA-----
-----TATGTGTGCATGAACATG-----
-----TGTATGTGTGCATGAACATGTGT-----
```

```
-----ATATGTATGTGTGCATGAACATGTGT-----  
-----TATATGTATGTGTGCATGAACAT-----  
-----TATATGTATGTGTGCATGAAC-----  
-----TATGTGTGCATGAACATGTGTA-----  
-----TATGTATGTGTGCATGAACATGTG-----  
-----TATGTATGTGTGCATGAACATG-----  
-----TGTATGTGTGCATGAACATG-----  
-----GTATGTGTGCATGAACATGTGTAT-----  
-----AATGGATACTCATTGTTC-----  
-----GAAAATGGATACTCATTG-----  
-----AAAATGGATACTCATTGT-----  
-----TGGATACTCATTGTCTA-----  
-----AAATGGATACTCATTGTT-----  
-----AAAATGGATACTCATTGTT-----  
-----CTATTGAATGATATGT-----  
-----TTCTATGAATGATATGT-----
```

>mmu-mir-466h

| ATGCCATGTGTGTATATTTGTGTGTGCATGTGCTTGTGTGTATGTGAATATATATATATACATACGCACGCACACACACACACAAATGCAAGCACATACACTCTCA | species | len | reads |
|------------------------------------------------------------------------------------------------------------|---------|-----|-------|
| -TGTCCATGTGTGTATATTTG-----                                                                                 | morL    | 20  | 9     |
| --GTCCATGTGTGTATATTTG-----                                                                                 | morL    | 19  | 5     |
| ATGCCATGTGTGTATATTTG-----                                                                                  | morL    | 21  | 2     |
| -TGTCCATGTGTGTATATTT-----                                                                                  | morL    | 19  | 1     |
| -----ATGTGTGTATATTTGTGT-----                                                                               | morL    | 18  | 1     |
| -----CATGTGTGTATATTTGTG-----                                                                               | morL    | 18  | 1     |
| -----TGTGTGCATGTGCTTGTGTGTAT-----                                                                          | mirL    | 23  | 391   |
| -----TGTGTGCATGTGCTTGTGTGTATGT-----                                                                        | mirL    | 25  | 135   |
| -----TGTGTGCATGTGCTTGTGTGT-----                                                                            | mirL    | 21  | 84    |
| -----TGTGTGTGCATGTGCTTGTGTGT-----                                                                          | mirL    | 23  | 44    |
| -----TGTGTGCATGTGCTTGTGTGTATG-----                                                                         | mirL    | 24  | 42    |
| -----GTGTGCATGTGCTTGTGTGTAT-----                                                                           | mirL    | 22  | 37    |
| -----GTGTGTGCATGTGCTTGTGTGT-----                                                                           | mirL    | 22  | 20    |
| -----TGTGTGCATGTGCTTGTGTGTA-----                                                                           | mirL    | 22  | 13    |
| -----TGTGTGCATGTGCTTGTGTG-----                                                                             | mirL    | 20  | 9     |
| -----GTGTGTGCATGTGCTTGTGTGTAT-----                                                                         | mirL    | 24  | 6     |
| -----TGTGTGCATGTGCTTGTG-----                                                                               | mirL    | 18  | 5     |
| -----GTGTGCATGTGCTTGTGTGT-----                                                                             | mirL    | 20  | 5     |
| -----GTGTGCATGTGCTTGTGT-----                                                                               | mirL    | 18  | 5     |
| -----GTGTGCATGTGCTTGTGTGTATGT-----                                                                         | mirL    | 24  | 4     |
| -----TGTGCATGTGCTTGTGTGTATG-----                                                                           | mirL    | 22  | 4     |
| -----TGTGTGTGCATGTGCTTGTGT-----                                                                            | mirL    | 21  | 4     |
| -----TGTGTGTGCATGTGCTTGTGTGTAT-----                                                                        | mirL    | 25  | 4     |
| -----TGTGCATGTGCTTGTGTGTAT-----                                                                            | mirL    | 21  | 4     |
| -----GTGTGTGCATGTGCTTGTGTGTATG-----                                                                        | mirL    | 25  | 4     |
| -----GTGTGCATGTGCTTGTGTGTA-----                                                                            | mirL    | 21  | 3     |
| -----GTGTGCATGTGCTTGTGTGTATG-----                                                                          | mirL    | 23  | 3     |

```

-----GTGTGTGCATGTGCTTGTGTG----- mirL 21 3
-----GTGTGCATGTGCTTGTGTG----- mirL 19 3
-----TGTGTGTGCATGTGCTTGTGTGTA----- mirL 24 2
-----GTGCATGTGCTTGTGTGTA----- mirL 19 2
-----GTGCATGTGCTTGTGTGTAT----- mirL 20 1
-----TGTGCATGTGCTTGTGTGTA----- mirL 20 1
-----TTGTGTGTGCATGTGCTTGTGTGT----- mirL 24 1
-----GTGCATGTGCTTGTGTGT----- mirL 18 1
-----TGTGTGTGCATGTGCTTGTGTGTATG----- mirL 26 1
-----TGTGAATATATATATCATA----- loop 19 7
-----TACGCACGCACACACACACACAA----- mirR 23 694
-----TACGCACGCACACACACACACAAA----- mirR 24 378
-----CGCACGCACACACACACACAA----- mirR 21 53
-----TACGCACGCACACACACACACAAAT----- mirR 25 30
-----ACGCACGCACACACACACACAA----- mirR 22 16
-----TCATACGCACGCACACACACAC----- mirR 22 8
-----CGCACGCACACACACACACAAA----- mirR 22 6
-----CATACGCACGCACACACACAC----- mirR 21 3
-----ATACGCACGCACACACACACAA----- mirR 24 2
-----CATACGCACGCACACACACACA----- mirR 22 2
-----TACGCACGCACACACACACAAATGCA----- mirR 28 1
-----TCATACGCACGCACACACAC----- mirR 20 1
-----ACGCACGCACACACACACAAAT----- mirR 24 1
-----GCACGCACACACACACACAAA----- mirR 21 1
-----TACGCACGCACACACACACAAATG----- mirR 26 1
-----TACGCACGCACACACACACAAATGC----- mirR 27 1
-----CGCACGCACACACACACAAAT----- mirR 23 1
-----CATACGCACGCACACACACAC----- mirR 23 1
-----AATGCAAGCACATACACTCTCA morR 22 2
-----ATGCAAGCACATACACTCT-- morR 19 1
-----AAATGCAAGCACATACACT---- morR 19 1
-----ATGCAAGCACATACACTC--- morR 18 1
-----GCAAGCACATACACTCTC- morR 18 1
-----AATGCAAGCACATACACT---- morR 18 1

```

>mmu-mir-470

```

AGCTGTGGTGTGCAGTGCTCTTCTTGGACTGGCACTGGTGAGTTAAACTAAATACAACCAGTACCTTTCTGAGAAGAGTAAAGCTCATCACATTCT species len reads
AGCTGTGGTGTGCAGTGCTCT----- morL 21 2
-GCTGTGGTGTGCAGTGCTC----- morL 19 1
----GTGGTGTGCAGTGCTCTT----- morL 18 1
-----TTCTTGGACTGGCACTGGTGA----- mirL 21 820
-----TTCTTGGACTGGCACTGGTGAGT----- mirL 23 349
-----TTCTTGGACTGGCACTGGTG----- mirL 20 292
-----TTCTTGGACTGGCACTGGTGAG----- mirL 22 132
-----CTTGGACTGGCACTGGTGA----- mirL 19 90
-----TCTTGGACTGGCACTGGTGA----- mirL 20 43

```

```

-----TTCTTGGACTGGCACTGG----- mirL 18 21
-----TTGGACTGGCACTGGTGA----- mirL 18 9
-----CTTGGACTGGCACTGGTG----- mirL 18 7
-----TTGGACTGGCACTGGTGAGT----- mirL 20 7
-----TTCTTGGACTGGCACTGGT----- mirL 19 6
-----TCTTGGACTGGCACTGGTG----- mirL 19 6
-----TCTTGGACTGGCACTGGT----- mirL 18 5
-----CTTGGACTGGCACTGGTGAG----- mirL 20 4
-----TTCTTGGACTGGCACTGGTGAGTT----- mirL 24 1
-----CTTCTTGGACTGGCACTGGTGA----- mirL 22 1
-----TCTTGGACTGGCACTGGTGAGT----- mirL 22 1
-----TCTTCTTGGACTGGCACT----- mirL 18 1
-----TCTTGGACTGGCACTGGTGAG----- mirL 21 1
-----AGTTAAACTAAATACAAC----- loop 18 3
-----TGAGTTAAACTAAATACA----- loop 18 1
-----GAGTTAAACTAAATACAA----- loop 18 1
-----TGAGTTAAACTAAATACAAC----- loop 20 1
-----AACCAGTACCTTCTGAGAAG----- mirR 21 115
-----AACCAGTACCTTCTGAGAAGA----- mirR 22 97
-----AACCAGTACCTTCTGAGAA----- mirR 20 17
-----ACCAGTACCTTCTGAGAAGA----- mirR 21 11
-----CCAGTACCTTCTGAGAAGA----- mirR 20 7
-----CAACCAGTACCTTCTGA----- mirR 18 2
-----ACAACCAGTACCTTCTG----- mirR 18 2
-----ACCAGTACCTTCTGAGA----- mirR 18 1
-----CAGTACCTTCTGAGAAGA----- mirR 19 1
-----TACAACCAGTACCTTCT----- mirR 18 1
-----CAGTACCTTCTGAGAAG----- mirR 18 1
-----AGTAAAGCTCATCACATT----- morR 18 1
-----AGTAAAGCTCATCACATTCT----- morR 20 1
-----GTAAAGCTCATCACATTC----- morR 18 1
-----AAGAGTAAAGCTCATCAC----- morR 18 1

```

>mmu-mir-599

```

CCACAGTGTATTTGATAAGATGACATAGGAGAGGAACCTCTTTACCTTTGTGTCAGTTTATCAAACCCATACCTGGATGACAAGCAA species len reads
CCACAGTGTATTTGATAA----- morL 18 2
-----ATGACATAGGAGAGGAAC----- mirL 18 4
-----TTTGTGTCAGTTTATCAAA----- mirR 19 1205
-----TTTGTGTCAGTTTATCAAAC----- mirR 20 388
-----TTTGTGTCAGTTTATCAA----- mirR 18 167
-----TTGTGTCAGTTTATCAAA----- mirR 18 145
-----TTGTGTCAGTTTATCAAAC----- mirR 19 75
-----TGTGTCAGTTTATCAAAC----- mirR 18 31
-----GTGTGTCAGTTTATCAAACCA----- mirR 20 2
-----ACCTTGTGTCAGTTTAT----- mirR 18 1
-----TTGTGTCAGTTTATCAAACC----- mirR 20 1

```



```

-----ATACCTGGATGACAAGCA- morR 18 3
-----AACCCATACCTGGATGAC----- morR 18 2
-----CCATACCTGGATGACAAG--- morR 18 1
-----ACCCATACCTGGATGACAAGC-- morR 21 1
-----ATACCTGGATGACAAGCAA morR 19 1

```

>mmu-mir-681

```

CAGCAACAACCTCAGAGCACAGTGCAGCCTCGCTGGCAGGCAGCTCCAGAGTGTGGCTGTCTCATCACTCTCCCTAAGCAGGTAGATGGGTTTCAGTTCACTCGCAGTCCAGGGCCTCCA species len reads
---AACAACTCAGAGCACAG----- morL 18 18
---ACCTCAGAGCACAGTGCA----- morL 18 1
CAGCAACAACCTCAGAGCACAGT----- morL 23 1
-----CAGCCTCGCTGGCAGGCAGCT----- mirL 21 1844
-----CAGCCTCGCTGGCAGGCAGC----- mirL 20 68
-----CCTCGCTGGCAGGCAGCT----- mirL 18 26
-----AGCCTCGCTGGCAGGCAGCT----- mirL 20 19
-----CAGCCTCGCTGGCAGGCA----- mirL 18 8
-----CAGCCTCGCTGGCAGGCAG----- mirL 19 6
-----CAGCCTCGCTGGCAGGCAGCTC----- mirL 22 3
-----CAGCCTCGCTGGCAGGCAGTCC----- mirL 23 1
-----GGTAGATGGGTTTCAGTT----- mirR 18 8
-----AGATGGGTTTCAGTTCAC----- mirR 18 3
-----GTAGATGGGTTTCAGTTC----- mirR 18 1
-----GCAGGTAGATGGGTTTCA----- mirR 18 1
-----AGGTAGATGGGTTTCAGT----- mirR 18 1
-----CTCGCAGTCCAGGGCCTCCA morR 20 1
-----ACTCGCAGTCCAGGGCCTCC- morR 20 1

```

>mmu-mir-448

```

CGAGGAGGTTGAACATCCTGCATAGTGTGCCAGGAAATCCCTACTTCATACTAAGAGGGGGCTGGCTGGTTGCATATGTAGGATGTCCCATCTCTGGCCCACTTCGTC species len reads
---GGAGGTTGAACATCCTGC----- morL 18 3
CGAGGAGGTTGAACATCCTGCAT----- morL 23 1
CGAGGAGGTTGAACATCCTGCA----- morL 22 1
-----ATAGTGCTGCCAGGAAAT----- mirL 18 7
-----ATAGTGCTGCCAGGAAATCC----- mirL 20 6
-----AGTGCTGCCAGGAAATCC----- mirL 18 3
-----ATAGTGCTGCCAGGAAATC----- mirL 19 2
-----GTGCTGCCAGGAAATCCC----- mirL 18 1
-----AGTGCTGCCAGGAAATCCCTA----- mirL 21 1
-----GCATAGTGCTGCCAGGAAA----- mirL 19 1
-----TTGCATATGTAGGATGTCCCAT----- mirR 22 1353
-----TTGCATATGTAGGATGTCCCA----- mirR 21 368
-----TTGCATATGTAGGATGTCCC----- mirR 20 76
-----TGCATATGTAGGATGTCCCAT----- mirR 21 35
-----GCATATGTAGGATGTCCCAT----- mirR 20 27
-----TTGCATATGTAGGATGTCC----- mirR 19 13
-----TGCATATGTAGGATGTCCC----- mirR 19 11

```

```

-----CATATGTAGGATGTCCCAT----- mirR 19 10
-----GCATATGTAGGATGTCCCA----- mirR 19 9
-----TGCATATGTAGGATGTCCCA----- mirR 20 9
-----TTGCATATGTAGGATGTCC----- mirR 18 7
-----TTGCATATGTAGGATGTCCCATCTC----- mirR 25 6
-----TTGCATATGTAGGATGTCCCATC----- mirR 23 5
-----TGGTTGCATATGTAGGATG----- mirR 19 2
-----TGCATATGTAGGATGTCC----- mirR 18 2
-----CTCCTGGCCCACTTCGTC morR 18 3
-----TCTCCTGGCCCACTTCGT- morR 18 1
-----ATCTCCTGGCCCACTTCG-- morR 18 1

```

>mmu-mir-449a

```

CTTGGCAGTGTATTGTTAGCTGGTTGAGTATGTGAGCGGCACCAGCTAACATGCGACTGCTCTCCTATTGCACACACAATCACCACC species len reads
--TGGCAGTGTATTGTTAGCTGG----- mirL 21 788
--TGGCAGTGTATTGTTAGCTGGT----- mirL 22 697
--TGGCAGTGTATTGTTAGCTG----- mirL 20 99
--TGGCAGTGTATTGTTAGCT----- mirL 19 76
--TGGCAGTGTATTGTTAGCTGGTT----- mirL 23 58
---GCAGTGTATTGTTAGCTGGT----- mirL 20 33
---GGCAGTGTATTGTTAGCTGGT----- mirL 21 27
---CAGTGTATTGTTAGCTGGT----- mirL 19 27
--TGGCAGTGTATTGTTAGCTGGTTG----- mirL 24 23
---GCAGTGTATTGTTAGCTGG----- mirL 19 8
--TGGCAGTGTATTGTTAGCT----- mirL 18 7
---GGCAGTGTATTGTTAGCTGG----- mirL 20 6
---GGCAGTGTATTGTTAGCTGGTT----- mirL 22 4
--TTGGCAGTGTATTGTTAGCTGG----- mirL 22 3
---GCAGTGTATTGTTAGCTG----- mirL 18 2
---GGCAGTGTATTGTTAGCT----- mirL 18 2
--TTGGCAGTGTATTGTTAGCTGGTT----- mirL 24 1
--TTGGCAGTGTATTGTTAGCTGGT----- mirL 23 1
CTTGGCAGTGTATTGTTA----- mirL 18 1
-----GGTTGAGTATGTGAGCGG----- loop 18 1
-----AGTATGTGAGCGGCACCA----- loop 18 1
-----TGAGTATGTGAGCGGCAC----- loop 18 1
-----CAGCTAACATGCGACTGCTCTC----- mirR 22 16
-----CAGCTAACATGCGACTGCTCT----- mirR 21 2
-----TTGCACACACAATCACCAC-- morR 18 2
-----TATTGCACACACAATCACCACC morR 22 2
-----ATTGCACACACAATCACCAC-- morR 19 1
-----TATTGCACACACAATCACCAC-- morR 20 1
-----TTGCACACACAATCACCACC morR 20 1

```

>mmu-mir-1937c

```

ACAAGTCTCACACAACGTACATCCAAGGGTATTCTTGGGTTTCTGGGTGCCCCCAAATCCCGAAGAGCCCCATGATGTAAGATCCCCTTTC species len reads

```

```

ACAAGTCTCACACAACGT----- morL 18 3
---GTCTCACACAACGTACAT----- morL 18 2
--AGTCTCACACAACGTACA----- morL 18 1
--AAGTCTCACACAACGTAC----- morL 18 1
-----ATCCAAGGGGTATTCTTG----- mirL 18 7
-----CAAGGGGTATTCTTGGGT----- mirL 18 3
-----TCCAAGGGGTATTCTTGG----- mirL 18 1
-----TACATCCAAGGGGTATTCTTG----- mirL 21 1
-----GGGTTTCTGGGTGCCCC----- loop 18 3
-----GTTTCTGGGTGCCCCAAAT----- loop 20 3
-----GGTTTCTGGGTGCCCCA----- loop 18 2
-----GGGTTTCTGGGTGCCCCAA----- loop 20 2
-----TTCTGGGTGCCCCAAAT----- loop 18 1
-----GGGTTTCTGGGTGCCCCAAA----- loop 21 1
-----TTCTGGGTGCCCCAAATC----- loop 19 1
-----TGGGTTTCTGGGTGCCCC----- loop 19 1
-----ATCCCGGAAGAGCCCCCA----- mirR 18 1728
-----TCCCGGAAGAGCCCCCAT----- mirR 18 52
-----ATCCCGGAAGAGCCCCCAT----- mirR 19 43
-----TCCCGGAAGAGCCCCCATG----- mirR 19 7
-----ATCCCGGAAGAGCCCCCATG----- mirR 20 4
-----AATCCCGGAAGAGCCCCCA----- mirR 19 3
-----AATCCCGGAAGAGCCCC----- mirR 18 2
-----CCGGAAGAGCCCCCATGA----- mirR 18 2
-----CCCGGAAGAGCCCCCATGA----- mirR 19 2
-----TCCCGGAAGAGCCCCCATGA----- mirR 20 2
-----ATCCCGGAAGAGCCCCCATGAT----- mirR 22 1
-----CCCGGAAGAGCCCCCATG----- mirR 18 1
-----CATGATGTAAGATCCCCTT----- morR 19 1
-----CATGATGTAAGATCCCCTTT----- morR 20 1
-----GATGTAAGATCCCCTTTC----- morR 18 1

>mmu-mir-1897
AGCCTAAATGGATTCTCCGTGCTTTGGATGGAGAAAGAGGGGGAAAGTGCAGCTCCTTCAACTCGTTCTGTCCGGTGAGGAGTGATCCAGCTTGGGCTG species len reads
---CTAAATGGATTCTCCGTG----- morL 18 2
AGCCTAAATGGATTCTCC----- morL 18 1
-----CTTTGGATGGAGAAAGAGGGGG----- mirL 23 7
-----CTTTGGATGGAGAAAGAGGGG----- mirL 21 3
-----CTTTGGATGGAGAAAGAGGGG----- mirL 22 1
-----CTTTGGATGGAGAAAGAG----- mirL 18 1
-----TGCTTTGGATGGAGAAAGAGGG----- mirL 22 1
-----TTGGATGGAGAAAGAGGGG----- mirL 19 1
-----TGGATGGAGAAAGAGGGG----- mirL 18 1
-----GGGAAGTGCAGCTCCTTC----- loop 19 1
-----GGGAAGTGCAGCTCCTT----- loop 18 1
-----TCAACTCGTTCTGTCCGGTGAG----- mirR 22 1087

```

```

-----TCAACTCGTTCTGTCCGGTGA----- mirR 21 296
-----TCAACTCGTTCTGTCCGGTG----- mirR 20 185
-----CAACTCGTTCTGTCCGGTGAG----- mirR 21 88
-----CAACTCGTTCTGTCCGGTGA----- mirR 20 52
-----TCAACTCGTTCTGTCCGGT----- mirR 19 28
-----ACTCGTTCTGTCCGGTGAG----- mirR 19 19
-----AACTCGTTCTGTCCGGTGAG----- mirR 20 17
-----CAACTCGTTCTGTCCGGTG----- mirR 19 17
-----AACTCGTTCTGTCCGGTGA----- mirR 19 17
-----ACTCGTTCTGTCCGGTGA----- mirR 18 9
-----AACTCGTTCTGTCCGGTG----- mirR 18 9
-----TTCAACTCGTTCTGTCCGGTGAG----- mirR 23 7
-----TCAACTCGTTCTGTCCGG----- mirR 18 4
-----CAACTCGTTCTGTCCGGT----- mirR 18 2
-----CAACTCGTTCTGTCCGGTGAG----- mirR 22 1
-----CTTCAACTCGTTCTGTCC----- mirR 18 1
-----GGAGTGATCCAGCTTGGG--- morR 18 2
-----AGGAGTGATCCAGCTTGG--- morR 18 1
-----GTGATCCAGCTTGGGCTG morR 18 1

```

>mmu-mir-384

```

AGCGGAATGTTAAATCAGGAATTGTAACAATTCCTAGGCAATGTGTATAATGTTGGTAAGTCATTCTAGAAATTGTTACAAATGCCTGTAACATATATTCAGC species len reads
AGCGGAATGTTAAATCAGGAAT----- morL 22 5
-GCGGAATGTTAAATCAGGA----- morL 19 1
AGCGGAATGTTAAATCAGGAATT----- morL 23 1
-GCGGAATGTTAAATCAGGAATT----- morL 22 1
-----TGTAACAATTCCTAGGCAATGT----- mirL 23 213
-----TGTAACAATTCCTAGGCAATG----- mirL 22 85
-----TGTAACAATTCCTAGGCAA----- mirL 20 16
-----GTAACAATTCCTAGGCAATG----- mirL 21 13
-----TAAACAATTCCTAGGCAATG----- mirL 20 12
-----TGTAACAATTCCTAGGCA----- mirL 19 7
-----GTAACAATTCCTAGGCAATGT----- mirL 22 6
-----TGTAACAATTCCTAGGC----- mirL 18 5
-----TGTAACAATTCCTAGGCAAT----- mirL 21 3
-----TGTAACAATTCCTAGGCAATGTG----- mirL 24 3
-----TAAACAATTCCTAGGCAATGTGT----- mirL 23 2
-----TAAACAATTCCTAGGCAA----- mirL 18 1
-----GTAACAATTCCTAGGCAATGTG----- mirL 23 1
-----TAAACAATTCCTAGGCAATGT----- mirL 21 1
-----GTAACAATTCCTAGGCAAT----- mirL 20 1
-----TGTATAATGTTGGTAAGTCA----- loop 20 3
-----TAATGTTGGTAAGTCATT----- loop 18 1
-----GTATAATGTTGGTAAGTC----- loop 18 1
-----GTGTATAATGTTGGTAAG----- loop 18 1
-----TGTATAATGTTGGTAAGT----- loop 18 1

```

```

-----ATTCCTAGAAAATTGTTACAAT----- mirR 22 541
-----ATTCCTAGAAAATTGTTACACA----- mirR 20 396
-----ATTCCTAGAAAATTGTTAC----- mirR 19 152
-----ATTCCTAGAAAATTGTTCA----- mirR 18 144
-----ATTCCTAGAAAATTGTTACAAA----- mirR 21 99
-----TTCCTAGAAAATTGTTACACA----- mirR 19 63
-----TCCTAGAAAATTGTTACACA----- mirR 18 37
-----TCATTCCTAGAAAATTGTTACACA----- mirR 22 13
-----ATTCCTAGAAAATTGTTACACAATG----- mirR 23 5
-----TCATTCCTAGAAAATTGTTAC----- mirR 21 4
-----TTCCTAGAAAATTGTTAC----- mirR 18 4
-----CATTTCCTAGAAAATTGTTACACA----- mirR 21 3
-----TCATTCCTAGAAAATTGTTACAAA----- mirR 23 3
-----CCTAGAAAATTGTTACACAAT----- mirR 19 3
-----CATTTCCTAGAAAATTGTTAC----- mirR 20 1
-----CATTTCCTAGAAAATTGTTCA----- mirR 19 1
-----CATTTCCTAGAAAATTGTTACACAAT----- mirR 23 1
-----TCATTCCTAGAAAATTGTT----- mirR 18 1
-----CCTGTAACATATATTCAGC morR 19 1
-----ATGCCTGTAACATATATCA-- morR 20 1

```

>mmu-mir-742

```

TAGAGTACCTGGGCAGTGCTCTACTCACATGGTTGCTAATCACGTGAAGTGTAGGTGAAAGCCACCATGCTGGGTAAAGTAAAGCTCATCATGTTCTTCA species len reads
--GAGTACCTGGGCAGTGCT----- morL 18 1
TAGAGTACCTGGGCAGTG----- morL 18 1
-----TACTCACATGGTTGCTAATCA----- mirL 21 198
-----CTCTACTCACATGGTTGC----- mirL 18 32
-----TACTCACATGGTTGCTAATC----- mirL 20 7
-----CTCACATGGTTGCTAATCA----- mirL 19 3
-----CTCACATGGTTGCTAATC----- mirL 18 1
-----TACTCACATGGTTGCTAA----- mirL 18 1
-----TACTCACATGGTTGCTAATCAC----- mirL 22 1
-----TCACGTGAAGTGTAGGTG----- loop 18 3
-----CACGTGAAGTGTAGGTGA----- loop 18 1
-----GAAAGCCACCATGCTGGGTAAA----- mirR 22 978
-----GAAAGCCACCATGCTGGGTAA----- mirR 21 429
-----GAAAGCCACCATGCTGGGTAA----- mirR 20 44
-----AGCCACCATGCTGGGTAAA----- mirR 19 43
-----AAGCCACCATGCTGGGTAAA----- mirR 20 30
-----AGCCACCATGCTGGGTAA----- mirR 18 29
-----AAAGCCACCATGCTGGGTAAA----- mirR 21 18
-----GAAAGCCACCATGCTGGGT----- mirR 19 18
-----AAGCCACCATGCTGGGTAA----- mirR 19 6
-----GAAAGCCACCATGCTGGG----- mirR 18 5
-----GAAAGCCACCATGCTGGGTAAAGTAAA----- mirR 27 2
-----AAAGCCACCATGCTGGGTAA----- mirR 20 1

```

C:\Documents and Settings\hong\Desktop\Reprogramming-total RNA.txt

```
-----TGAAAGCCACCATGCTGGG----- mirR 19 1
-----AAGCTCATCATGTTCTTCA morR 19 1

>mmu-mir-147
AAGAACACTCTATGAATCTAGTGGAAACATTTCTGCACAACTAGATGTTGATGCCAGTGTGCGGAAATGCTTCTGCTACATTTGTAGGGTTGCCTGCA species len reads
AAGAACACTCTATGAATC----- morL 18 1
-----ACTCTATGAATCTAGTGG----- morL 18 1
-AGAACACTCTATGAATCTAGTG----- morL 22 1
-AGAACACTCTATGAATCTA----- morL 19 1
-----TGGAAACATTTCTGCACAACTAG----- mirL 24 30
-----TGGAAACATTTCTGCACAACT----- mirL 22 21
-----GTGGAACATTTCTGCACAACTA----- mirL 24 4
-----TGGAAACATTTCTGCACAAAC----- mirL 21 4
-----TGGAAACATTTCTGCACAA----- mirL 19 3
-----GGAAACATTTCTGCACAA----- mirL 18 2
-----TGGAAACATTTCTGCACAACTA----- mirL 23 2
-----GAAACATTTCTGCACAAAC----- mirL 19 1
-----AGTGGAACATTTCTGCACAAA----- mirL 22 1
-----GGAAACATTTCTGCACAACTAG----- mirL 23 1
-----AAACATTTCTGCACAAAC----- mirL 18 1
-----GTGTGCGGAAATGCTTCTGCTA----- mirR 22 881
-----GTGTGCGGAAATGCTTCTGCTAC----- mirR 23 239
-----GTGTGCGGAAATGCTTCTGCT----- mirR 21 234
-----GTGTGCGGAAATGCTTCTGCT----- mirR 20 182
-----GTGTGCGGAAATGCTTCTGCTACA----- mirR 24 95
-----GTGTGCGGAAATGCTTCTG----- mirR 19 76
-----GTGTGCGGAAATGCTTCT----- mirR 18 20
-----TGTGCGGAAATGCTTCTGCTAC----- mirR 22 6
-----AGTGTGCGGAAATGCTTCTGCTAC----- mirR 24 5
-----GTGCGGAAATGCTTCTGCT----- mirR 18 4
-----TGTGCGGAAATGCTTCTGCTA----- mirR 21 3
-----AGTGTGCGGAAATGCTTCTG----- mirR 20 3
-----AGTGTGCGGAAATGCTTCTGCTA----- mirR 23 3
-----AGTGTGCGGAAATGCTTCTGCT----- mirR 22 1
-----CAGTGTGCGGAAATGCTTCT----- mirR 20 1
-----GTGCGGAAATGCTTCTGCTA----- mirR 20 1
-----TGTGCGGAAATGCTTCTGCT----- mirR 20 1
-----AGTGTGCGGAAATGCTTCT----- mirR 19 1
-----CTACATTTGTAGGGTTTG----- morR 18 9
-----ACATTTGTAGGGTTTGCCCT--- morR 19 1
-----CATTGTAGGGTTTGCCCT--- morR 18 1
-----CTACATTTGTAGGGTTTGCCCTGCA morR 24 1
-----ACATTTGTAGGGTTTGCC--- morR 18 1
```

```
>mmu-mir-686
TG CAG CGG ATT CCC GGG CCA CAG CAG GTG CTT AT ATT G CTT CCC AGA CCG GTGA AGAA GTA ATAG AGATCA ACC CGTAC CTTCTGGGCACCATGGCTGGGGGTGCAGCGGATTGCAGCTTCTGGGAGCGGTTGTTGGCTCG
```

```

-----CGGATTCCCGGGCCACAGCAGGTGCTT-----
-----GGCCACAGCAGGTGCTTA-----
---AGCGGATTCCCGGGCCACAGCAGGTGCTTAT---
-----ATTCCCGGGCCACAGCAGGTGCT-----
-----TCCCGGGCCACAGCAGGTGCTT-----
-GCAGCGGATTCCCGGGCCACAGCAGGTGCTT-----
-----ACAGCAGGTGCTTATATT-----
TGCAGCGGATTCCCGGGCCACAGCAGGTGCT-----
-----GCGGATTCCCGGGCCACAGCAGGTGCTT-----
TGCAGCGGATTCCCGGGCCACAGCAGGTGCTT-----
-----ATTGCTTCCCAGACGGTGAAGA-----
-----ATTGCTTCCCAGACGGTGA-----
-----ATTGCTTCCCAGACGGTGAAG-----
-----GCTTCCCAGACGGTGAAGA-----
-----ATTGCTTCCCAGACGGTGAAG-----
-----TTGCTTCCCAGACGGTGAAGA-----
-----TGCTTCCCAGACGGTGAAGA-----
-----ATTGCTTCCCAGACGGTG-----
-----ATTGCTTCCCAGACGGTGAAGAA-----
-----TATTGCTTCCCAGACGGTGAAGA-----
-----TTGCTTCCCAGACGGTGAAG-----
-----TGCTTCCCAGACGGTGAAG-----
-----TATTGCTTCCCAGACGGTGA-----
-----GCTTCCCAGACGGTGAAGAA-----
-----GCTTCCCAGACGGTGAAGAAAGTAATAGAG-----
-----TATTGCTTCCCAGACGGT-----
-----TGCTTCCCAGACGGTGAAGAAAGTAATAGAGATC-----
-----GCTTCCCAGACGGTGAAG-----
-----ATTGCTTCCCAGACGGTGAAGAAAGTAATAGAG-----
-----GCGGATTGCAGCTTCTGG-----
-----CGGATTGCAGCTTCTGGG-----
-----GCGGATTGCAGCTTCTGGG-----
-----GCAGCGGATTGCAGCTTC-----
-----GCGGTTGTTGGCTCG-----
-----GGGAGCGGTTGTTGGCTCG-----

```

>mmu-mir-592

|                                                                                                                           | species | len | re  |
|---------------------------------------------------------------------------------------------------------------------------|---------|-----|-----|
| TCCATGATATTATGCCATGACATTGTGTCATATGCGATGATGTGTTGTGATGGCACAGCGTCATCAGTGGTGACGCAACATCATGACGTAAGACATCACATCGCCAATTAAGAGGTAATCC | morL    | 18  | 1   |
| ---ATGATATTATGCCATGAC---                                                                                                  | morL    | 20  | 1   |
| TCCATGATATTATGCCATGA                                                                                                      | morL    | 19  | 1   |
| ---ATGATATTATGCCATGACA                                                                                                    | mirL    | 20  | 273 |
| -----ATTGTGTCAATATGCGATGA-----                                                                                            | mirL    | 19  | 254 |
| -----TTGTGTCAATATGCGATGA-----                                                                                             | mirL    | 22  | 207 |
| -----TTGTGTCAATATGCGATGATG-----                                                                                           | mirL    | 19  | 130 |
| -----GTGTCAATATGCGATGATG-----                                                                                             | mirL    | 21  | 128 |
| -----TTGTGTCAATATGCGATGATG-----                                                                                           |         |     |     |

```

-----TTGTGTCAATATGCGATG----- mirL 18 125
-----ATTGTGTCAATATGCGATGATG----- mirL 22 120
-----TGTGTCAATATGCGATGATG----- mirL 20 107
-----ATTGTGTCAATATGCGATGATGT----- mirL 23 27
-----TTGTGTCAATATGCGATGATGTG----- mirL 23 24
-----TTGTGTCAATATGCGATGAT----- mirL 20 24
-----GTGTCAATATGCGATGAT----- mirL 18 18
-----TGTGTCAATATGCGATGATGT----- mirL 21 18
-----ATTGTGTCAATATGCGATG----- mirL 19 18
-----TGTGTCAATATGCGATGA----- mirL 18 15
-----GTGTCAATATGCGATGATGT----- mirL 20 12
-----ATTGTGTCAATATGCGATGAT----- mirL 21 11
-----ATTGTGTCAATATGCGAT----- mirL 18 4
-----TGTGTCAATATGCGATGATGTG----- mirL 22 3
-----ACATTGTGTCAATATGCG----- mirL 18 2
-----GTAAGACATCACATCGCCA----- mirR 19 183
-----GTAAGACATCACATCGCC----- mirR 18 72
-----GTAAGACATCACATCGCCAAT----- mir 21 10
-----GTAAGACATCACATCGCCAA----- mir 20 10
-----TAAGACATCACATCGCCA----- mirR 18 4
-----AGACATCACATCGCCAAT----- mirR 18 3
-----AAGACATCACATCGCCAAT----- mirR 19 2
-----TAAGACATCACATCGCCAA----- mirR 19 1
-----GACGTAAGACATCACATC----- mirR 18 1
-----CAATTAAGAGGTAATCC morR 18 1

```

>mmu-mir-1247

```

GCAGCCCCGGCCCGCGGGCGCACCCGTCCCGTTTCGTCCCGGACGTTGCTCTCTGCCCCGGGAACGTCGAGACTGGAGCGCCCGAACTGAGCCACCTTCG species len reads
---GCCCCGGCCCGCGGGCGC----- morL 18 11
---CCCGGGCCCGCGGGCGCA----- morL 18 8
GCAGCCCCGGCCCGCGGGC----- morL 19 3
--AGCCCCGGCCCGCGGGCGC----- morL 19 1
--GCCCCGGCCCGCGGGCGCA----- morL 19 1
-CAGCCCCGGCCCGCGGGC----- morL 18 1
---CCCGGGCCCGGGCGCAC----- morL 19 1
---CCGGCCCGCGGGCGCAC----- morL 18 1
---CCCCGGCCCGGGCGCAC----- morL 19 1
-----ACCCGTCCCGTTCGTCCCGGA----- mirL 22 720
-----ACCCGTCCCGTTCGTCCCG----- mirL 20 261
-----ACCCGTCCCGTTCGTCCCGGAC----- mirL 23 248
-----ACCCGTCCCGTTCGTCCCGGACG----- mirL 24 147
-----ACCCGTCCCGTTCGTCCCGG----- mirL 21 146
-----ACCCGTCCCGTTCGTCCCG----- mirL 19 109
-----ACCCGTCCCGTTCGTCCCG----- mirL 18 37
-----CACCCGTCCCGTTCGTCCCGGACG----- mirL 25 19
-----CGTCCCGTTCGTCCCGGA----- mirL 19 11

```



```

-----GCACCCGTCCCGTTCGT----- mirL 18 5
-----CCGTCCCGTTCGTCCCG----- mirL 18 4
-----CACCCGTCCCGTTCGTCCC----- mirL 20 3
-----CCCGTCCCGTTCGTCCCC----- mirL 18 3
-----CGTCCCGTTCGTCCCGG----- mirL 18 1
-----CCCGTCCCGTTCGTCCCGG----- mirL 20 1
-----CACCCGTCCCGTTCGTCC----- mirL 18 1
-----CGGGAACGTCGAGACTGGAGC----- mirR 21 40
-----CGGGAACGTCGAGACTGGAGCG----- mirR 22 3
-----CCCGGGAACGTCGAGACTG----- mirR 19 2
-----GGGAACGTCGAGACTGGA----- mirR 18 2
-----CGGGAACGTCGAGACTGGAG----- mirR 20 1
-----CCGGGAACGTCGAGACTG----- mirR 18 1
-----CCCCGGGAACGTCGAGAC----- mirR 18 1
-----CGAACTGAGCCACCTTCG morR 18 5
-----AGCGCCCGAACTGAGCCA----- morR 18 3
-----GCCCGAACTGAGCCACCTT-- morR 19 1
-----GCGCCCGAACTGAGCCAC----- morR 18 1
-----CCGAACTGAGCCACCTTC- morR 18 1
-----GCGCCCGAACTGAGCCACCT-- morR 20 1

>mmu-mir-2139
ATGCTCCCCTACTGGAGAAGGAGCAGAGGGCCAGGACTGGCATTGGACATGCAGCTGCCAGCAAGGTGGTGTGTCCGAGCTGCGCTGCTCCTGGTAACTGCGGCTTACAAACTCTACAAG species len rea
ATGCTCCCCTACTGGAGAA----- morL 18 1
-----AGGAGCAGAGGGCCAGGA----- mirL 18 4
-----AGCAGAGGGCCAGGACTG----- mirL 18 2
-----AGGAGCAGAGGGCCAGGAC----- mirL 19 2
-----GGAGCAGAGGGCCAGGAC----- mirL 18 1
-----GAGCAGAGGGCCAGGACT----- mirL 18 1
-----AGCAGAGGGCCAGGACTGG----- mirL 19 1
-----AGCTGCGCTGCTCCTGGTAACTG----- mirR 23 653
-----AGCTGCGCTGCTCCTGGTAACTGC----- mirR 24 599
-----AGCTGCGCTGCTCCTGGTAACT----- mirR 22 208
-----GCTGCGCTGCTCCTGGTAACTGC----- mirR 23 59
-----GCTGCGCTGCTCCTGGTAACTG----- mirR 22 44
-----TGCCTGCTCCTGGTAACTG----- mirR 20 41
-----CTGCGCTGCTCCTGGTAACTG----- mirR 21 34
-----AGCTGCGCTGCTCCTGGTAA----- mirR 20 29
-----AGCTGCGCTGCTCCTGGTAA----- mirR 21 21
-----CTGCGCTGCTCCTGGTAACTGC----- mirR 22 17
-----TGCCTGCTCCTGGTAACT----- mirR 19 16
-----TGCCTGCTCCTGGTAACTGC----- mirR 21 16
-----AGCTGCGCTGCTCCTGGT----- mirR 18 9
-----GCTGCGCTGCTCCTGGTAA----- mirR 19 9
-----CAGCTGCGCTGCTCCTGGTAACTGC----- mirR 25 8
-----AGCTGCGCTGCTCCTGGTAA----- mirR 19 6

```

```

-----CTGCGCTGCTCCTGGTAACT----- mirR 20 3
-----CTGCGCTGCTCCTGGTAACT----- mirR 19 2
-----TGCGCTGCTCCTGGTAACT----- mirR 18 2
-----GCTGCGCTGCTCCTGGTAACT----- mirR 20 1
-----CTGCGGCTTACAAACTCT----- morR 18 4
-----GCGGCTTACAAACTCTAC--- morR 18 2
-----GCTTACAAACTCTACAAG morR 18 2
-----CGGCTTACAAACTCTACAA- morR 19 1
-----CGGCTTACAAACTCTACAAG morR 20 1
-----TGCGGCTTACAAACTCTACAAG morR 22 1

```

>mmu-mir-1957

```

ATACCATAACAGCTGGAAAGTAGCTCAGTGGTAGAGCATATGACCAGCATGTGCAAGGCCCTGAGTTTATCCCCAGCACTGCAAAAACAAAGCCATGTAGAAAATAGCT species len reads
ATACCATAACAGCTGGAAAGT----- morL 21 21
-----TAAACAGCTGGAAAGTAGCT----- morL 19 2
ATACCATAACAGCTGGAAAGTAG----- morL 23 1
-----CTCAGTGGTAGAGCATAT----- mirL 18 419
-----CAGTGGTAGAGCATATGAC----- mirL 19 309
-----CAGTGGTAGAGCATATGA----- mirL 18 293
-----CAGTGGTAGAGCATATGACC----- mirL 20 44
-----AGTGGTAGAGCATATGAC----- mirL 18 36
-----TCAGTGGTAGAGCATATG----- mirL 18 25
-----AGTGGTAGAGCATATGACC----- mirL 19 16
-----AGCTCAGTGGTAGAGCATA----- mirL 19 14
-----CTCAGTGGTAGAGCATATG----- mirL 19 13
-----TAGCTCAGTGGTAGAGCATA----- mirL 20 10
-----AGCTCAGTGGTAGAGCATAT----- mirL 20 10
-----GCTCAGTGGTAGAGCATATGACC----- mirL 23 8
-----TAGCTCAGTGGTAGAGCA----- mirL 18 6
-----TAGCTCAGTGGTAGAGCATAT----- mirL 21 5
-----AGCTCAGTGGTAGAGCAT----- mirL 18 4
-----TAGCTCAGTGGTAGAGCATATG----- mirL 22 4
-----AGCTCAGTGGTAGAGCATATGA----- mirL 22 4
-----CTCAGTGGTAGAGCATATGA----- mirL 20 4
-----GCTCAGTGGTAGAGCATATG----- mirL 20 3
-----GCTCAGTGGTAGAGCATAT----- mirL 19 3
-----TCAGTGGTAGAGCATATGA----- mirL 19 3
-----GCTCAGTGGTAGAGCATA----- mirL 18 2
-----AGCTCAGTGGTAGAGCATATG----- mirL 21 2
-----TAGCTCAGTGGTAGAGCATATGA----- mirL 23 2
-----TAGCTCAGTGGTAGAGCAT----- mirL 19 1
-----GCTCAGTGGTAGAGCATATGAC----- mirL 22 1
-----AGCTCAGTGGTAGAGCATATGACC----- mirL 24 1
-----AGCTCAGTGGTAGAGCATATGAC----- mirL 23 1
-----TAGCTCAGTGGTAGAGCATATGACC----- mirL 25 1
-----TCCCCAGCACTGCAAAAAC----- mirR 18 489

```

```

-----ATCCCCAGCACTGCAAAAAC----- mirR 19 22
-----ATCCCCAGCACTGCAAAA----- mirR 18 7
-----CCCCAGCACTGCAAAAACA----- mirR 18 4
-----TCCCCAGCACTGCAAAAACA----- mirR 19 2
-----CCAGCACTGCAAAAACA----- mirR 18 1
-----ATCCCCAGCACTGCAAAAACA----- mirR 20 1
-----AAGCCATGTAGAAAATAGCT morR 20 1

```

>mmu-mir-375

```

CCCGCGACGAGCCCCTCGCACAAACCGGACCTGAGCGTTTTGTTTCGTTTCGGCTCGCGTGAGGCAGGGCGGCTTCTCAGCATCAGCCTTGGGGCC species len reads
---GCGACGAGCCCCTCGCACAAAC----- mirL 23 4
---GCGACGAGCCCCTCGCACAA----- mirL 20 4
-CCGCGACGAGCCCCTCGC----- mirL 18 3
---GCGACGAGCCCCTCGCACAAAC----- mirL 22 3
--CGCGACGAGCCCCTCGCA----- mirL 18 3
-----ACGAGCCCCTCGCACAAA----- mirL 18 2
---GCGACGAGCCCCTCGCACAAA----- mirL 21 2
CCCGCGACGAGCCCCTCG----- mirL 18 1
---GCGACGAGCCCCTCGCAC----- mirL 18 1
--CGCGACGAGCCCCTCGCAC----- mirL 19 1
-----ACCGGACCTGAGCGTTTT----- loop 18 1
-----TTTGTTCGTTTCGGCTCGCGTGA----- mirR 22 1322
-----TTGTTTCGTTTCGGCTCGCGTGA----- mirR 21 94
-----TTTGTTCGTTTCGGCTCGCGTG----- mirR 21 92
-----TTTGTTCGTTTCGGCTCGCGTGAG----- mirR 23 74
-----TTTGTTCGTTTCGGCTCGCGT----- mirR 20 29
-----TTTGTTCGTTTCGGCTCGC----- mirR 18 25
-----TTGTTTCGTTTCGGCTCGCGTG----- mirR 20 19
-----TTTGTTCGTTTCGGCTCGCG----- mirR 19 19
-----TTGTTTCGTTTCGGCTCGCGTGAG----- mirR 22 19
-----TTTTGTTCGTTTCGGCTCGCGTGA----- mirR 23 9
-----TGTTTCGTTTCGGCTCGCGTGA----- mirR 20 8
-----TGTTCGTTTCGGCTCGCGT----- mirR 18 8
-----GTTTCGTTTCGGCTCGCGTGA----- mirR 19 7
-----TTTGTTCGTTTCGGCTCGCGTGAGG----- mirR 24 7
-----TGTTTCGTTTCGGCTCGCGTGAGG----- mirR 22 6
-----TGTTCGTTTCGGCTCGCGTG----- mirR 19 3
-----TTGTTTCGTTTCGGCTCGCGTGAGG----- mirR 23 3
-----TTTTGTTCGTTTCGGCTCGCGTG----- mirR 22 1
-----TGTTTCGTTTCGGCTCGCGTGAG----- mirR 21 1
-----TTGTTTCGTTTCGGCTCGCGT----- mirR 19 1
-----TTGTTTCGTTTCGGCTCGCG----- mirR 18 1
-----GTTTTGTTCGTTTCGGCTC----- mirR 18 1
-----AGGCAGGGGCGGCTTCTC----- morR 18 6
-----AGGGCGGCTTCTCAGCA----- morR 18 2
-----GAGGCAGGGGCGGCTTCT----- morR 18 2

```

```

-----GAGGCAGGGGCGGCTTCTCA----- morR 20 1
-----GGCAGGGGCGGCTTCTCAGCA----- morR 21 1
-----AGGCAGGGGCGGCTTCTCA----- morR 19 1
-----TGAGGCAGGGGCGGCTTC----- morR 18 1
-----GGCAGGGGCGGCTTCTCAGCATCAGCCTTGGGGCC morR 35 1

```

>mmu-mir-105

```

GCTCTGTGTGTGCATTTTAGCCAAGTGCTCAGATGCTTGTGGTGGCTGCTTATGCACCACGAATGCTTGAGCATGTGCTATGGTACCTACTTTTACAACATTGCCATCTGCTTCTGGAACAAAGCCATTCACTACTCT sp
GCTCTGTGTGTGCATTTT----- mo
--TCTGTGTGTGCATTTTAGCC----- mo
--TCTGTGTGTGCATTTTAG----- mo
-----CAAGTGCTCAGATGCTTGTGGT----- mi
-----CCAAGTGCTCAGATGCTTGTGGT----- mi
-----CAAGTGCTCAGATGCTTGTGG----- mi
-----CCAAGTGCTCAGATGCTTGTGG----- mi
-----AAGTGCTCAGATGCTTGTGGT----- mi
-----AGTGCTCAGATGCTTGTGGT----- mi
-----AAGTGCTCAGATGCTTGTG----- mi
-----CAAGTGCTCAGATGCTTGTG----- mi
-----GTGCTCAGATGCTTGTGGT----- mi
-----CCAAGTGCTCAGATGCTTGTGGTG----- mi
-----CCAAGTGCTCAGATGCTTGTG----- mi
-----CAAGTGCTCAGATGCTTGTGGTG----- mi
-----AAGTGCTCAGATGCTTGTGG----- mi
-----AGTGCTCAGATGCTTGTGG----- mi
-----CCAAGTGCTCAGATGCTT----- mi
-----GTGCTCAGATGCTTGTGGTGGC----- mi
-----CAAGTGCTCAGATGCTTG----- mi
-----AACAAAGCCATTCACTACTCT----- mi
-----TGGAACAAAGCCATTCAT----- mi
-----AAAGCCATTCACTACTCT----- mi

```

>mmu-mir-3061

```

GATATATTGTGTACTGTGGGGCAGTGGGCCGTGAAAGGTAGCCTGGTGGTCCCCCTTGAGCTAAGGCTACCTTTGATAGTCCACTGCCCCACGGTGCATGCATTGGTGT species len reads
GATATATTGTGTACTGTG----- morL 18 2
--TATATTGTGTACTGTGGGG----- morL 19 1
---ATTGTGTACTGTGGGGCA----- morL 18 1
--ATATTGTGTACTGTGGGG----- morL 18 1
--TATATTGTGTACTGTGGG----- morL 18 1
-----CAGTGGGCCGTGAAAGGTAGC----- mirL 21 77
-----CAGTGGGCCGTGAAAGGTAGCC----- mirL 22 30
-----CAGTGGGCCGTGAAAGGTAGCCT----- mirL 23 27
-----CAGTGGGCCGTGAAAGGTAGCCTG----- mirL 24 12
-----CAGTGGGCCGTGAAAGGTAGCCTGG----- mirL 25 12
-----CAGTGGGCCGTGAAAGGTAGCCTGGT----- mirL 26 10
-----AGTGGGCCGTGAAAGGTAGCCT----- mirL 22 3

```

```

-----TGGGCCGTGAAAGGTAGCCTGG----- mirL 22 2
-----AGTGGGCCGTGAAAGGTAGCCTGG----- mirL 24 1
-----AGTGGGCCGTGAAAGGTA----- mirL 18 1
-----GTGGGCCGTGAAAGGTAGCCTGG----- mirL 23 1
-----CAGTGGGCCGTGAAAGGT----- mirL 18 1
-----GTGGTCCCTTTGAGCTA----- loop 18 1
-----CTACCTTTGATAGTCCACTGCC----- mirR 22 650
-----CTACCTTTGATAGTCCACTGCCC----- mirR 23 518
-----CTACCTTTGATAGTCCACTGC----- mirR 21 225
-----CTACCTTTGATAGTCCACTGCCCC----- mirR 24 47
-----TACCTTTGATAGTCCACTGCCC----- mirR 22 32
-----CTACCTTTGATAGTCCACTG----- mirR 20 28
-----CTACCTTTGATAGTCCACTGCCCCA----- mirR 25 17
-----CTACCTTTGATAGTCCACTGCCCCAC----- mirR 26 13
-----GGCTACCTTTGATAGTCCACTG----- mirR 22 6
-----ACCTTTGATAGTCCACTG----- mirR 18 6
-----TACCTTTGATAGTCCACTGCCCC----- mirR 23 5
-----TACCTTTGATAGTCCACTGC----- mirR 20 4
-----GGCTACCTTTGATAGTCCAC----- mirR 20 3
-----GCTACCTTTGATAGTCCACTGC----- mirR 22 2
-----TACCTTTGATAGTCCACTGCC----- mirR 21 2
-----CCTTTGATAGTCCACTGC----- mirR 18 1
-----AGGCTACCTTTGATAGTCCACTG----- mirR 23 1
-----CCACGGTGCATGCATTGG----- morR 18 2
-----CCACGGTGCATGCATTGGT----- morR 19 1
-----CCACGGTGCATGCATTGGTGT----- morR 22 1
-----CCCCACGGTGCATGCATT----- morR 18 1

>mmu-mir-684-1
TTTGTACGTAGCTGTTACATGTAGGGCAATCTGTCTTTAAGTAGGGATAAAATTACTCTTGAACAAAATGATCCTAGATAGTTTTCCCTTCAAGTCAAGCGTCTTGCTGTTTTAAATAAACTTCTT species len re
---GTACGTAGCTGTTACATGTAGGGCAATCT----- morL 29 18
---TACGTAGCTGTTACATGTAGGGCAATCT----- morL 28 7
-TTGTACGTAGCTGTTACATGTAGGGCAATCT----- morL 31 6
-----GCTGTTACATGTAGGGCAATCTGTCT----- morL 26 5
---GTACGTAGCTGTTACATGTAGGGCAATC----- morL 28 5
-TTGTACGTAGCTGTTACATGTAGGGCAATC----- morL 30 4
-----ATGTAGGGCAATCTGTCT----- morL 18 3
--TGTACGTAGCTGTTACATGTAGGGCAAT----- morL 28 2
---GTACGTAGCTGTTACATGTAGGGCAATCTGT----- morL 31 2
---GTACGTAGCTGTTACATGTAGGGCAATCTGTC----- morL 32 2
-----GTAGCTGTTACATGTAGGGCAATCTGT----- morL 27 2
TTTGTACGTAGCTGTTACATGTAGGGCAATC----- morL 31 1
-TTGTACGTAGCTGTTACATGTAGGGCAAT----- morL 29 1
---TACGTAGCTGTTACATGTAGGGCAATC----- morL 27 1
-----ACATGTAGGGCAATCTGT----- morL 18 1
-----GTAGCTGTTACATGTAGGGCAATCTG----- morL 26 1

```

```

-----GTTACATGTAGGGCAATC----- morL 18 1
-----TCTTTAAGTAGGGATAAA----- mirL 18 9
-----AGTTTTCCCTTCAAGTCAA----- mirR 19 992
-----AGTTTTCCCTTCAAGTCA----- mirR 18 618
-----GTTTTCCCTTCAAGTCAA----- mirR 18 25
-----TAGTTTTCCCTTCAAGTCA----- mirR 19 5
-----ATAGTTTTCCCTTCAAGT----- mirR 18 2
-----ATAGTTTTCCCTTCAAGTCAA----- mirR 21 2
-----TTTCCCTTCAAGTCAAGC----- mirR 18 2
-----TTTCCCTTCAAGTCAAGCG----- mirR 19 1
-----TTTCCCTTCAAGTCAAG----- mirR 18 1
-----AGTTTTCCCTTCAAGTCAAG----- mirR 20 1
-----AGTTTTCCCTTCAAGTCAAGCG----- mirR 22 1
-----GTCTTGCTGTTTTAAATAAAC----- morR 20 2
-----TCTTGCTGTTTTAAATAAACTTCTT morR 24 1
-----GTCTTGCTGTTTTAAATAAAA----- morR 19 1
-----TCTTGCTGTTTTAAATAAAA----- morR 18 1

```

>mmu-mir-684-2

```

TTGTACGTAGCTGTTACATGTAGGGCAATCTGTCTTTAAGTAGGGATAAAATTACTCTTGAACAAAATGATCCTAGATAGTTTTCCCTTCAAGTCAAGTGTCTTGTTGTTTTAAAT species len reads
---GTACGTAGCTGTTACATGTAGGGCAATCT----- morL 29 18
---TACGTAGCTGTTACATGTAGGGCAATCT----- morL 28 7
-TTGTACGTAGCTGTTACATGTAGGGCAATCT----- morL 31 6
-----GCTGTTACATGTAGGGCAATCTGTCT----- morL 26 5
---GTACGTAGCTGTTACATGTAGGGCAATC----- morL 28 5
-TTGTACGTAGCTGTTACATGTAGGGCAATC----- morL 30 4
-----ATGTAGGGCAATCTGTCT----- morL 18 3
---GTAGCTGTTACATGTAGGGCAATCTGT----- morL 27 2
---GTACGTAGCTGTTACATGTAGGGCAATCTGT----- morL 31 2
--TGACGTAGCTGTTACATGTAGGGCAAT----- morL 28 2
---GTACGTAGCTGTTACATGTAGGGCAATCTGTC----- morL 32 2
-----GTTACATGTAGGGCAATC----- morL 18 1
-----ACAIGTAGGGCAATCTGT----- morL 18 1
TTGTACGTAGCTGTTACATGTAGGGCAATC----- morL 31 1
-----GTAGCTGTTACATGTAGGGCAATCTG----- morL 26 1
-TTGTACGTAGCTGTTACATGTAGGGCAAT----- morL 29 1
---TACGTAGCTGTTACATGTAGGGCAAT----- morL 27 1
-----TCTTTAAGTAGGGATAAA----- mirL 18 9
-----AGTTTTCCCTTCAAGTCAA----- mirR 19 992
-----AGTTTTCCCTTCAAGTCA----- mirR 18 618
-----GTTTTCCCTTCAAGTCAA----- mirR 18 25
-----TAGTTTTCCCTTCAAGTCA----- mirR 19 5
-----ATAGTTTTCCCTTCAAGTCAA----- mirR 21 2
-----ATAGTTTTCCCTTCAAGT----- mirR 18 2
-----AGTTTTCCCTTCAAGTCAAG----- mirR 20 1
-----TTTCCCTTCAAGTCAAG----- mirR 18 1

```

```

-----CAAGTGTCTTGTGTTTAA---- morR 18 3
-----GTGTCTTGTGTTTAAAAAT morR 19 1
-----AGTGTCTTGTGTTTAAAAA- morR 19 1
-----TGTCTTGTGTTTAAAAAT morR 18 1

```

>mmu-mir-1894

| Species | len | reads |
|---------|-----|-------|
| morL    | 18  | 1     |
| morL    | 19  | 1     |
| morL    | 18  | 1     |
| morL    | 18  | 1     |
| morL    | 18  | 1     |
| morL    | 18  | 1     |
| mirL    | 22  | 1195  |
| mirL    | 21  | 143   |
| mirL    | 21  | 70    |
| mirL    | 20  | 47    |
| mirL    | 18  | 46    |
| mirL    | 20  | 44    |
| mirL    | 19  | 18    |
| mirL    | 19  | 12    |
| mirL    | 20  | 11    |
| mirL    | 18  | 11    |
| mirL    | 18  | 9     |
| mirL    | 18  | 4     |
| mirL    | 23  | 4     |
| mirL    | 23  | 3     |
| mirL    | 18  | 2     |
| mirL    | 20  | 1     |
| loop    | 19  | 4     |
| loop    | 20  | 2     |
| loop    | 20  | 1     |
| loop    | 18  | 1     |
| mirR    | 22  | 40    |
| mirR    | 18  | 8     |
| mirR    | 21  | 5     |
| mirR    | 20  | 2     |
| mirR    | 21  | 1     |
| mirR    | 18  | 1     |
| mirR    | 23  | 1     |
| mirR    | 21  | 1     |
| mirR    | 19  | 1     |
| mirR    | 19  | 1     |
| mirR    | 19  | 1     |
| mirR    | 18  | 1     |
| mirR    | 18  | 1     |

```
-----GCCAGCCAGTGAGGATTT--- morR 18 2
-----GAGGGCCAGCCAGTGAGG----- morR 18 1
-----CAGCCAGTGAGGATTTTG- morR 18 1
-----GGCCAGCCAGTGAGGATTTT- morR 20 1
-----CAGCCAGTGAGGATTTTGA morR 19 1

>mmu-mir-1186
GGCCTTGAAGTTCAGAAATCCACCTGTCTCTGCCTCCCGAGTGTGGAATTAAGGCATGCACCACCACTGCCCGCAGGTTCTGTTATTCTGAGTGTGAGAAATATATGGGGAAAAGTCTTCATGGTGAGTCC specie
-----GAACTCAGAAATCCACCTGTCTCTGCCTCCC----- morL 3
-----AAATCCACCTGTCTCTGCCTCC----- morL 2
-----AACTCAGAAATCCACCTGTCTCTGCCTCC----- morL 2
-----AACTCAGAAATCCACCTGTCTCTGCCTCCCG----- morL 3
-----ACTCAGAAATCCACCTGTCTCTGCCTCCCGAG----- morL 3
-----AATCCACCTGTCTCTGCCTCC----- morL 2
-----CCACCTGTCTCTGCCTCCC----- morL 1
-----CACCTGTCTCTGCCTCCC----- morL 1
-----ATCCACCTGTCTCTGCCT----- morL 1
-----AAATCCACCTGTCTCTGCCTCCC----- morL 2
-----GAAATCCACCTGTCTCTGCCTC----- morL 2
-----AAATCCACCTGTCTCTGCCTC----- morL 2
-----AGAAATCCACCTGTCTCTGCCTCCCGAG----- morL 2
-----AACTCAGAAATCCACCTGTCTCTGCCTC----- morL 2
-----CAGAAATCCACCTGTCTCTGCCTCCC----- morL 2
-----AATCCACCTGTCTCTGCCTCCC----- morL 2
-----TCCACCTGTCTCTGCCTCC----- morL 1
GGCCTTGAAGTTCAGAAATCCACCTGTCTCTGCCTC----- morL 3
-----ACTCAGAAATCCACCTGTCTCTGCCTCC----- morL 2
-----ATCCACCTGTCTCTGCCTCC----- morL 2
-----AGAAATCCACCTGTCTCTGCCTCCCG----- morL 2
-----TCCACCTGTCTCTGCCTCCCG----- morL 2
-----AATCCACCTGTCTCTGCCTCCCG----- morL 2
-----CTCAGAAATCCACCTGTCTCTGCCTCCCGAG----- morL 3
-----AACTCAGAAATCCACCTGTCTCTGCCT----- morL 2
-----ACTCAGAAATCCACCTGTCTCTGCCTCCCGA----- morL 3
-----TCCACCTGTCTCTGCCTCCC----- morL 2
-----CTGTCTCTGCCTCCCGAG----- morL 1
-----GAACTCAGAAATCCACCTGTCTCTGCCTCCCGA----- morL 3
-----ACCTGTCTCTGCCTCCCG----- morL 1
-----CCTGTCTCTGCCTCCCGAG----- morL 1
-----TCAGAAATCCACCTGTCTCTGCCTCCCG----- morL 2
-----AATCCACCTGTCTCTGCCTCCCGA----- morL 2
-----AATCCACCTGTCTCTGCCTC----- morL 2
-----ACTCAGAAATCCACCTGTCTCTGCCTC----- morL 2
-----GAAATCCACCTGTCTCTGCCTCC----- morL 2
-----GAGTGCTGGAATTAAGGCATG----- mirL 2
-----GAGTGCTGGAATTAAGGCATGC----- mirL 2
```



```
-----CGAGTGCTGGAATTAAAGGCATGC----- mirL 2
-----GAGTGCTGGAATTAAAGGCAT----- mirL 2
-----CGAGTGCTGGAATTAAAGGCAT----- mirL 2
-----CGAGTGCTGGAATTAAAGGCATG----- mirL 2
-----GAGTGCTGGAATTAAAGGCA----- mirL 2
-----CGAGTGCTGGAATTAAAGGCA----- mirL 2
-----GAGTGCTGGAATTAAAGGCATGCA----- mirL 2
-----CGAGTGCTGGAATTAAAGGCATGCA----- mirL 2
-----GAGTGCTGGAATTAAAGGCATGCAC----- mirL 2
-----AGTGCTGGAATTAAAGGCATG----- mirL 2
-----TGCTGGAATTAAAGGCATG----- mirL 1
-----GAGTGCTGGAATTAAAGGC----- mirL 1
-----CGAGTGCTGGAATTAAAGGC----- mirL 2
-----AGTGCTGGAATTAAAGGCATGC----- mirL 2
-----GTGCTGGAATTAAAGGCA----- mirL 1
-----GTGCTGGAATTAAAGGCATG----- mirL 2
-----CCGAGTGCTGGAATTAAAGGCATGC----- mirL 2
-----CGAGTGCTGGAATTAAAG----- mirL 1
-----AGTGCTGGAATTAAAGGC----- mirL 1
-----CCCGAGTGCTGGAATTAAAGGCATG----- mirL 2
-----AGTGCTGGAATTAAAGGCAT----- mirL 2
-----CCGAGTGCTGGAATTAAAGGCATG----- mirL 2
-----TGCTGGAATTAAAGGCAT----- mirL 1
-----AGTGCTGGAATTAAAGGCATGCA----- mirL 2
-----TGAGTGTGAGAAATATATGGG----- mirR 2
-----TGAGTGTGAGAAATATATGG----- mirR 2
-----TGAGTGTGAGAAATATAT----- mirR 1
-----TGAGTGTGAGAAATATATGGGGA----- mirR 2
-----GAGTGTGAGAAATATATG----- mirR 1
-----GAAAAGTCTTCATGGTGA----- morR 1
-----GGGAAAAGTCTTCATGGT----- morR 1
-----GGGAAAAGTCTTCATGG----- morR 1
-----AAGTCTTCATGGTGAGTCC morR 1
```

>mmu-mir-1931

```
CTGTTCTTTTATCTGGCGAGCCATCTCCTAGGCCAGAACATTAACCTTTGAATGCTGCTCGTCAAAGATCTGTTGAGAGCCTTTGAATTGAAGCTGCTTTAAAATTCCAATGCAAGGGCTGGTGCGATGGCTCAGTGG
CTGTTCTTTTATCTGGCG-----
-----GCCATCTCCTAGGCCAGA-----
-----CATCTCCTAGGCCAGAAG-----
```

```
>mmu-mir-184
TGCTGCAGATCCCCTTTCCTTATCACTTTTCCAGCCAGCTTTGTGACTCTAAGTGTGGACGGAGAACTGATAAGGGTAGGTGACTGGCACTCCCTGCC species len reads
TGCTGCAGATCCCCTTT-----morL 18 2
-----CCTTATCACTTTTCCAGCCAGC-----mirL 22 81
```

```

-----CCTTATCACTTTTCCAGCCAG----- mirL 21 9
-----CCTTATCACTTTTCCAGCCAGCT----- mirL 23 6
-----CCTTATCACTTTTCCAGCCA----- mirL 20 2
-----CCTTATCACTTTTCCAGCCAGCTT----- mirL 24 1
-----TTCCTTATCACTTTTCCA----- mirL 18 1
-----CCTTATCACTTTTCCAGC----- mirL 18 1
-----TATCACTTTTCCAGCCAG----- mirL 18 1
-----GCTTTGTGACTCTAAGTG----- loop 18 2
-----AGCTTTGTGACTCTAAGT----- loop 18 2
-----TGGACGGAGAAGTATAAGGGT----- mirR 22 1244
-----TGGACGGAGAAGTATAAGGGTA----- mirR 23 120
-----TGGACGGAGAAGTATAAGGGTAG----- mirR 24 69
-----TGGACGGAGAAGTATAAGGG----- mirR 21 54
-----TGGACGGAGAAGTATAAG----- mirR 19 22
-----TGGACGGAGAAGTATAAG----- mirR 20 15
-----GGACGGAGAAGTATAAGGGT----- mirR 21 14
-----GGACGGAGAAGTATAAGGGTA----- mirR 22 7
-----TGGACGGAGAAGTATAAGGGTAGG----- mirR 25 1
-----TTGGACGGAGAAGTATAAGGGT----- mirR 23 1
-----GACGGAGAAGTATAAG----- mirR 18 1
-----GTGACTGGCACTCCCTGCC morR 19 1
-----GTGACTGGCACTCCCTGC- morR 18 1

```

>mmu-mir-453

```

GAAGATGCAGGAGTGCTGTGAGAAGTGCCATCCCCTGGTACTTGGAGGGAGGTTGCCTCATAGTGAGCTTGCATTATTTAATGATGCCCAAT species len reads
GAAGATGCAGGAGTGCTG----- morL 18 1
-----AAGTGCCATCCCCTGGTA----- mirL 18 1
-----AGTGCCATCCCCTGGTAC----- mirL 18 1
-----GAAGTGCCATCCCCTGGT----- mirL 18 1
-----AGGTTGCCTCATAGTGAGCTTGCA----- mirR 24 1114
-----AGGTTGCCTCATAGTGAGCTTGC----- mirR 23 227
-----AGGTTGCCTCATAGTGAGCTTG----- mirR 22 144
-----GGTTGCCTCATAGTGAGCTTGCA----- mirR 23 52
-----AGGTTGCCTCATAGTGAGCTT----- mirR 21 31
-----TTGCCTCATAGTGAGCTTGCA----- mirR 21 18
-----GTTGCCTCATAGTGAGCTTGCA----- mirR 22 16
-----TTGCCTCATAGTGAGCTTGC----- mirR 20 9
-----GGTTGCCTCATAGTGAGCTTG----- mirR 21 7
-----AGGTTGCCTCATAGTGAGCTTGCA----- mirR 25 5
-----GAGGTTGCCTCATAGTGAGCTTGCA----- mirR 25 2
-----TTGCCTCATAGTGAGCTT----- mirR 18 1
-----GTTGCCTCATAGTGAGCTTGC----- mirR 21 1
-----GTTGCCTCATAGTGAGCTT----- mirR 19 1
-----GAGGTTGCCTCATAGTGA----- mirR 18 1
-----TATTTAATGATGCCCAAT morR 18 14

```

>mmu-mir-669f

| Sequence                                                                                                     | Species | Len | Reads |
|--------------------------------------------------------------------------------------------------------------|---------|-----|-------|
| CCCCCATGTATGTGCCTGTGTATAGTTGTGTGTCATGTGCATGTGTGTATATGAATATACATATACATACACACACACCGTATAAACGCAAGCACAAACACACACAGA | morL    | 24  | 4     |
| -CCCCATGTATGTGCCTGTGTAT-                                                                                     | morL    | 20  | 4     |
| -----ATGTATGTGCCTGTGTAT-----                                                                                 | morL    | 19  | 4     |
| -----ATGTATGTGCCTGTGTAT-----                                                                                 | morL    | 23  | 1     |
| CCCCCATGTATGTGCCTGTGTGT                                                                                      | morL    | 21  | 1     |
| --CCCATGTATGTGCCTGTGTGT--                                                                                    | mirL    | 24  | 604   |
| -----AGTTGTGTGTCATGTGCATGTGT-----                                                                            | mirL    | 22  | 395   |
| -----AGTTGTGTGTCATGTGCATGT-----                                                                              | mirL    | 23  | 56    |
| -----AGTTGTGTGTCATGTGCATGTG-----                                                                             | mirL    | 18  | 43    |
| -----AGTTGTGTGTCATGTGCATG-----                                                                               | mirL    | 21  | 21    |
| -----AGTTGTGTGTCATGTGCAT-----                                                                                | mirL    | 20  | 12    |
| -----AGTTGTGTGTCATGTGCATGTGTG-----                                                                           | mirL    | 25  | 5     |
| -----GTTGTGTGTCATGTGCATGTGT-----                                                                             | mirL    | 23  | 2     |
| -----TAGTTGTGTGTCATGTG-----                                                                                  | mirL    | 18  | 1     |
| -----TAGTTGTGTGTCATGTGCATGT-----                                                                             | mirL    | 23  | 1     |
| -----TAGTTGTGTGTCATGTGC-----                                                                                 | mirL    | 19  | 1     |
| -----CATATACATACACACACACGTAT-----                                                                            | mirR    | 23  | 190   |
| -----CATATACATACACACACACGT-----                                                                              | mirR    | 21  | 127   |
| -----CATATACATACACACACACGT-----                                                                              | mirR    | 22  | 55    |
| -----ATATACATACACACACACGTAT-----                                                                             | mirR    | 22  | 37    |
| -----ATATACATACACACACACGT-----                                                                               | mirR    | 21  | 8     |
| -----ATATACATACACACACAC-----                                                                                 | mirR    | 18  | 8     |
| -----ATATACATACACACACACGT-----                                                                               | mirR    | 20  | 7     |
| -----ATACATACACACACACGT-----                                                                                 | mirR    | 18  | 4     |
| -----ACATATACATACACACACACGTAT-----                                                                           | mirR    | 24  | 4     |
| -----ATACATACACACACACGTAT-----                                                                               | mirR    | 20  | 4     |
| -----ACATATACATACACACACACGT-----                                                                             | mirR    | 22  | 4     |
| -----TATACATACACACACACGTAT-----                                                                              | mirR    | 21  | 4     |
| -----ATATACATACACACACACGTATA-----                                                                            | mirR    | 23  | 3     |
| -----TACATATACATACACACACCG-----                                                                              | mirR    | 22  | 2     |
| -----ATATACATACACACACACCG-----                                                                               | mirR    | 19  | 2     |
| -----CATATACATACACACACACCG-----                                                                              | mirR    | 20  | 2     |
| -----TATACATACACACACACCG-----                                                                                | mirR    | 18  | 2     |
| -----TATACATACACACACACCGTA-----                                                                              | mirR    | 20  | 1     |
| -----CATATACATACACACACA-----                                                                                 | mirR    | 18  | 1     |
| -----TACATATACATACACACACAC-----                                                                              | mirR    | 21  | 1     |
| -----CATATACATACACACACAC-----                                                                                | mirR    | 19  | 1     |
| -----ATACATATACATACACACAC-----                                                                               | mirR    | 20  | 1     |
| -----TATACATACACACACACCGT-----                                                                               | mirR    | 19  | 1     |
| -----ATACATATACATACACACACAC-----                                                                             | mirR    | 22  | 1     |
| -----TATACATACACACACACCGTATA-----                                                                            | mirR    | 22  | 1     |
| -----ATACATACACACACACCGTA-----                                                                               | mirR    | 19  | 1     |
| -----CATATACATACACACACACGTATA-----                                                                           | mirR    | 24  | 1     |
| -----CGCAAGCACAAACACACA-----                                                                                 | morR    | 18  | 2     |

```

-----TAAACGCAAGCACAAACACACA---- morR 22 2
-----AACGCAAGCACAAACACACACA-- morR 22 2
-----ATAAACGCAAGCACAAAC----- morR 18 2
-----AACGCAAGCACAAACACACAC--- morR 21 1
-----AACGCAAGCACAAACACACA----- morR 18 1
-----AACGCAAGCACAAACACACACA---- morR 20 1
-----CGCAAGCACAAACACACAC--- morR 19 1
-----TAAACGCAAGCACAAACACAC----- morR 19 1
-----AAACGCAAGCACAAACACACACA--- morR 21 1
-----ACGCAAGCACAAACACACAC--- morR 20 1
-----CGCAAGCACAAACACACACAGA morR 22 1
-----ACGCAAGCACAAACACACACAGA morR 23 1
-----AAACGCAAGCACAAACACACAC--- morR 22 1

>mmu-mir-760
CTCGGTGCGGGGCGCGTCGCCCCCTCAGGCCACCAGAGCCCGGATACCTCAGAAATTCGGTCTGGGTCTGTGGGGAGCGAAATGCAACCCAAACCCCGTTT species len reads
-TCGGTGCAGGGGCGCGTCGCCC----- morL 20 1
-TCGGTGCAGGGGCGCGTCGCCCC----- morL 22 1
-----GCGGGGCGCGTCGCCCC----- morL 18 1
CTCGGTGCGGGGCGCGTC----- morL 18 1
-----CCCCTCAGGCCACCAGAGCCCG----- mirL 22 258
-----CCCCTCAGGCCACCAGAGCCCGGA----- mirL 24 112
-----CCCCTCAGGCCACCAGAGCCCGGATA----- mirL 26 59
-----CCCCTCAGGCCACCAGAGCCCG----- mirL 23 40
-----CCCCTCAGGCCACCAGAGCC----- mirL 20 27
-----CCCCTCAGGCCACCAGAGCCCGGAT----- mirL 25 18
-----CCCTCAGGCCACCAGAGCCCG----- mirL 21 13
-----CTCAGGCCACCAGAGCCCG----- mirL 19 12
-----CCCCTCAGGCCACCAGAGCCCGGATAC----- mirL 27 11
-----CCTCAGGCCACCAGAGCCCG----- mirL 20 4
-----GCCCCCTCAGGCCACCA----- mirL 18 3
-----CGGATACCTCAGAAATTCGG----- loop 20 1
-----CGGCTCTGGGTCTGTGGGGAG----- mirR 22 251
-----CGGCTCTGGGTCTGTGGGGAGCG----- mirR 23 152
-----CGGCTCTGGGTCTGTGGGGA----- mirR 20 147
-----CGGCTCTGGGTCTGTGGGGAGCGA----- mirR 24 133
-----CGGCTCTGGGTCTGTGGGGAG----- mirR 21 99
-----TCGGCTCTGGGTCTGTGGGGAGC----- mirR 23 38
-----GCTCTGGGTCTGTGGGGAG----- mirR 19 30
-----CGGCTCTGGGTCTGTGGGGAGCGAA----- mirR 25 23
-----CGGCTCTGGGTCTGTGGGG----- mirR 19 20
-----TCGGCTCTGGGTCTGTGGGGAGCGA----- mirR 25 19
-----TCGGCTCTGGGTCTGTGGGGAGCG----- mirR 24 19
-----TCGGCTCTGGGTCTGTGGGGAG----- mirR 22 19
-----TTCGGCTCTGGGTCTGTGGGGAG----- mirR 23 10
-----GGCTCTGGGTCTGTGGGGAG----- mirR 20 8

```

```

-----TCGGCTCTGGGTCTGTGGGGA----- mirR 21 8
-----CTCTGGGTCTGTGGGAGCGA----- mirR 21 7
-----ATTCGGCTCTGGGTCTGTGGGAG----- mirR 24 6
-----GGCTCTGGGTCTGTGGGGA----- mirR 19 5
-----TCGGCTCTGGGTCTGTGGG----- mirR 19 3
-----ATTCGGCTCTGGGTCTGTGGGGA----- mirR 23 3
-----TCGGCTCTGGGTCTGTGGG----- mirR 20 3
-----CTCTGGGTCTGTGGGAG----- mirR 18 2
-----TTCGGCTCTGGGTCTGTGG----- mirR 19 2
-----CTCTGGGTCTGTGGGAGC----- mirR 19 1
-----ATTCGGCTCTGGGTCTGTGG----- mirR 20 1
-----GCTCTGGGTCTGTGGGGA----- mirR 18 1
-----CTCTGGGTCTGTGGGAGCGAAAT----- mirR 24 1
-----CGAAATGCAACCCAAACCCCG----- morR 21 28
-----CGAAATGCAACCCAAACCCCGT----- morR 22 13
-----CGAAATGCAACCCAAACCCCGTT----- morR 23 11
-----CGAAATGCAACCCAAACCC----- morR 18 7
-----CGAAATGCAACCCAAACCCCGTTT----- morR 24 4
-----CGAAATGCAACCCAAACCC----- morR 19 3
-----CGAAATGCAACCCAAACCC----- morR 20 2
-----AAATGCAACCCAAACCC----- morR 18 1
-----GCGAAATGCAACCCAAAC----- morR 18 1

```

>mmu-mir-741

```

AAATGTCTCATGTGCATTGATCTACGTAGATTGGTACCTATCATGTAAATCATGTAAGCATGAGAGATGCCATTCTATGTAGATTAAGGCTCATAACATTCTTC species len reads
AAATGTCTCATGTGCATTGA----- mirL 20 1
-----TACGTAGATTGGTACCTATCATGT----- mirL 24 2
-----TCTACGTAGATTGGTACC----- mirL 18 1
-----TACGTAGATTGGTACCTATCA----- mirL 21 1
-----TGAGAGATGCCATTCTATGTAG----- mirR 22 857
-----TGAGAGATGCCATTCTATGT----- mirR 20 267
-----TGAGAGATGCCATTCTATGTAGA----- mirR 23 166
-----TGAGAGATGCCATTCTATG----- mirR 19 89
-----GAGATGCCATTCTATGTAG----- mirR 19 68
-----GAGAGATGCCATTCTATGTAG----- mirR 21 41
-----AGAGATGCCATTCTATGTAG----- mirR 20 27
-----GAGAGATGCCATTCTATGTAGA----- mirR 22 22
-----GAGAGATGCCATTCTATGT----- mirR 19 16
-----AGAGATGCCATTCTATGTAGA----- mirR 21 14
-----TGAGAGATGCCATTCTATGTA----- mirR 21 7
-----GAGATGCCATTCTATGTAGA----- mirR 20 2
-----TGAGAGATGCCATTCTATGTAGAT----- mirR 24 2
-----AGAGATGCCATTCTATGTAGAT----- mirR 22 1
-----GAGATGCCATTCTATGTAGAT----- mirR 21 1
-----GAGAGATGCCATTCTATGTAGAT----- mirR 23 1
-----AAGGCTCATAACATTCTTC morR 19 1

```

```

-----AGATTAAGGCTCATAACAT----- morR 19 1

>mmu-mir-1948
AGGCAGAATTCTCACCTTACTATATGAGTATTCTGCCTAAATGTGGTGTACGGATACATTTAGGCAGAGCACTCGTACAGTAAGGTGAGAATCAGGAAATC species len reads
-GGCAGAATTCTCACCTTA----- morL 18 82
---CAGAATTCTCACCTTACT----- morL 18 2
---AGAATTCTCACCTTACTA----- morL 18 2
--GCAGAATTCTCACCTTAC----- morL 18 2
AGGCAGAATTCTCACCTTA----- morL 19 1
--GCAGAATTCTCACCTTACT----- morL 19 1
---AGAATTCTCACCTTACTAT----- morL 19 1
-----TATGAGTATTCTGCCTAAATGT----- mirL 22 24
-----ATATGAGTATTCTGCCTAAATG----- mirL 22 10
-----ATATGAGTATTCTGCCTAAATGT----- mirL 23 9
-----ATATGAGTATTCTGCCTAAATGTG----- mirL 24 1
-----TATATGAGTATTCTGCCTAAA----- mirL 21 1
-----TGAGTATTCTGCCTAAATG----- mirL 19 1
-----TATATGAGTATTCTGCCTAA----- mirL 20 1
-----ATATGAGTATTCTGCCTAAAT----- mirL 21 1
-----TATGAGTATTCTGCCTAAATGTG----- mirL 23 1
-----TTTAGGCAGAGCACTCGTACA----- mir 21 574
-----TTTAGGCAGAGCACTCGTACAG----- mir 22 353
-----TTTAGGCAGAGCACTCGTAC----- mir 20 143
-----TTTAGGCAGAGCACTCGTA----- mir 19 70
-----TTAGGCAGAGCACTCGTACA----- mir 20 54
-----TTAGGCAGAGCACTCGTACAG----- mir 21 53
-----TAGGCAGAGCACTCGTACAG----- mir 20 43
-----ATTTAGGCAGAGCACTCGTACA----- mir 22 25
-----AGGCAGAGCACTCGTACAG----- mir 19 15
-----TTAGGCAGAGCACTCGTACAGT----- mir 22 14
-----TAGGCAGAGCACTCGTACA----- mir 19 10
-----TTAGGCAGAGCACTCGTAC----- mir 19 9
-----TAGGCAGAGCACTCGTAC----- mir 18 7
-----TTTAGGCAGAGCACTCGT----- mir 18 7
-----TTTAGGCAGAGCACTCGTACAGTAA----- mir 24 3
-----AGGCAGAGCACTCGTACAGT----- mir 20 3
-----AGGCAGAGCACTCGTACA----- mir 18 3
-----ATTTAGGCAGAGCACTCG----- mir 18 2
-----TTAGGCAGAGCACTCGTACAGTA----- mir 23 1
-----ACATTTAGGCAGAGCACTCGTACA----- mir 24 1
-----CATTTAGGCAGAGCACTC----- mir 18 1
-----ACATTTAGGCAGAGCACT----- mir 18 1
-----TTAGGCAGAGCACTCGTA----- mir 18 1
-----AGGTGAGAATCAGGAAAT----- morR 18 4
-----AGGTGAGAATCAGGAAATC----- morR 19 1
-----AGTAAGGTGAGAATCAGGA----- morR 19 1

```

>mmu-mir-715

```
ATGTGGCTCCGGTTGTGTGGTGGTGGCTGGGGAGAGGGCTCCGTGCACACCCCCCGTGC CGCGGTACTTTCCTCCCCTCCTGAGGGCCCGCTGCGGGACGGGGTGTGGGTAGGCAACGGTGGGCTCCCGGGTCCCCACCC
-----GTGGTGGCTGGGGAGAGGG-----
-----GTGGTGGTGGCTGGGGAGAGGGC-----
-----GGTTGTGTGGTGGTGGCTGGGGAGAGGGC-----
-----TGTGGTGGTGGCTGGGGAGAGGGC-----
-----GGTTGTGTGGTGGTGGCTGGGGAGAG-----
-----GTGGTGGCTGGGGAGAGG-----
-----GTGTGGTGGTGGCTGGGGAGAGGGCT-----
-----GGTTGTGTGGTGGTGGCTGGGGAGA-----
-----GGTTGTGTGGTGGTGGCTGGGGAGAGGGCTC-----
-----GTGGTGGCTGGGGAGAGGGC-----
-----TGGTGGTGGCTGGGGAGAGG-----
ATGTGGCTCCGGTTGTGTGGTGGTGGCTGGGGAGA-----
-----TGGTGGTGGCTGGGGAGAG-----
-----GGTTGTGTGGTGGTGGCTGGGGAGAGGGCT-----
-----GTGGCTGGGGAGAGGGCT-----
-----GTGGTGGTGGCTGGGGAGA-----
-----TTGTGTGGTGGTGGCTGGGGAGA-----
--GTGGCTCCGGTTGTGTGGTGGTGGCTGGGGAGAG-----
-----GTGTGGTGGTGGCTGGGGAGAG-----
-----TGTGGTGGTGGCTGGGGAGAG-----
-----CCGGTTGTGTGGTGGTGGCTGGGGAGAGGG-----
-----GTTGTGTGGTGGTGGCTGGGGAGAGGGC-----
-----CTCCGGTTGTGTGGTGGTGGCTGGGGAGAG-----
-----GTGGTGGCTGGGGAGAGGGCT-----
-----GTGTGGTGGTGGCTGGGGAGAGGGCTC-----
-----TGGTGGCTGGGGAGAGGG-----
-----GGTTGTGTGGTGGTGGCTGGGGAGAGGG-----
-----GGTGGCTGGGGAGAGGGCT-----
-----GTGGTGGTGGCTGGGGAGAGGG-----
-----TTGTGTGGTGGTGGCTGGGGAGAGGGCTC-----
-----GTGGTGGTGGCTGGGGAGAGGGCT-----
-----GGTGGCTGGGGAGAGGGC-----
-----GGTGGCTGGGGAGAGGGCTC-----
-----TGTGTGGTGGTGGCTGGGGAGAG-----
-----GTGTGGTGGTGGCTGGGGAGA-----
-----GTGGTGGTGGCTGGGGAGAGGGCTC-----
-----TGGCTGGGGAGAGGGCTC-----
-----CCGGTTGTGTGGTGGTGGCTGGGGAGA-----
-----GTTGTGTGGTGGTGGCTGGGGAGAGGG-----
-----CTCCGGTTGTGTGGTGGTGGCTGGGGAGAGGGC-----
-----GTGTGGTGGTGGCTGGGGAGAGGG-----
-----TTGTGTGGTGGTGGCTGGGGAGAGG-----
-----TGTGTGGTGGTGGCTGGGGAGAGGGCTC-----
```



-----GTTGTGTGGTGGTGGCTGGGGAGA-----  
-----TGTGTGGTGGTGGCTGGGGAGAGG-----  
-----CGGTTGTGTGGTGGTGGCTGGGGAGAGG-----  
-----GGTGGTGGCTGGGGAGAGGGCT-----  
-----CTCCGTGCACACCCCCGCGTG-----  
-----CTCCGTGCACACCCCCGCGT-----  
-----CTCCGTGCACACCCCCGCG-----  
-----CTCCGTGCACACCCCCGCG-----  
-----CGTGCACACCCCCGCGTG-----  
-----GCTCCGTGCACACCCCCG-----  
-----GGGCTCCGTGCACACCCCCGCGTGCGGGTAC-----  
-----CCGTGCACACCCCCGCGTG-----  
-----TCCGTGCACACCCCCGCGTG-----  
-----GGCTCCGTGCACACCCCCGCGTGCGCGGTA-----  
-----GCTCCGTGCACACCCCCGCGTGCGGGTACTTTCC-----  
-----GGCTCCGTGCACACCCCCG-----  
-----GGCTCCGTGCACACCCCCGCGTGCGGGTACTTTC-----  
-----GGCTCCGTGCACACCCCCGCGTGCGGGTACT-----  
-----TCCGTGCACACCCCCGCGT-----  
-----GGGCTCCGTGCACACCCCCGCGTGCGGGTACTTT-----  
-----CCGTGCACACCCCCGCGTGCG-----  
-----CGTGCACACCCCCGCGTGCG-----  
-----GGGCTCCGTGCACACCCCCG-----  
-----GGCTCCGTGCACACCCCC-----  
-----GGGCTCCGTGCACACCCCCGCGTG-----  
-----CGTGCACACCCCCGCGTGCG-----  
-----GGGCTCCGTGCACACCCCC-----  
-----GGGCTCCGTGCACACCCCC-----  
-----GCTCCGTGCACACCCCCGCG-----  
-----CGTGCACACCCCCGCGTGCGGGT-----  
-----GGGCTCCGTGCACACCCCCGCGTGCGGGT-----  
-----GGCTCCGTGCACACCCCCGCGT-----  
-----GCTCCGTGCACACCCCCGCGTGCGGGTA-----  
-----GCTCCGTGCACACCCCCGCGTGCGGGTACTT-----  
-----CTCCGTGCACACCCCCGCGTG-----  
-----GGCTCCGTGCACACCCCCGCGTG-----  
-----CCGTGCACACCCCCGCGTGCGGG-----  
-----CCGTGCACACCCCCGCGT-----  
-----GGTACTTTCCTCCCCTCCTGAGGGCCGCGT-----  
-----GGTACTTTCCTCCCCTCCTGAGGGCCGCGTG-----  
-----CGCGGTACTTTCCTCCCCTCCTGAGGGCCGCC-----  
-----GTGCGGGTACTTTCCTCCCCTCCTGAGGGCCGCC-----  
-----CGGTACTTTCCTCCCCTCCTGAGGGCCGC-----  
-----GCGGGACGGGGTGTGGGTAGG-----  
-----CGTGCGGGACGGGGTGTGGGTAGG-----  
-----GCGGGACGGGGTGTGGGTAGGCA-----

-----GCGGGACGGGGTGTGGGTAGGC-----  
-----GCGGGACGGGGTGTGGGTAGGCAA-----  
-----GCGGGACGGGGTGTGGGT-----  
-----GGGACGGGGTGTGGGTAG-----  
-----TGCGGGACGGGGTGTGGGTAGGC-----  
-----GCGGGACGGGGTGTGGGTAGGCAACG-----  
-----GTGCGGGACGGGGTGTGG-----  
-----GGACGGGGTGTGGGTAGGCA-----  
-----CGTGCGGGACGGGGTGTGGGTAGGCAACGGTGG-----  
-----CGGGACGGGGTGTGGGTAGGCAACG-----  
-----CGGGACGGGGTGTGGGTAGGC-----  
-----GTGCGGGACGGGGTGTGGGTA-----  
-----TGCGGGACGGGGTGTGGGTAGGCAACG-----  
-----GTGCGGGACGGGGTGTGGGTAGGCAACGGTGG-----  
-----GGACGGGGTGTGGGTAGGCAACGGT-----  
-----GTGCGGGACGGGGTGTGGGTAGGCA-----  
-----GTGCGGGACGGGGTGTGGGTAGG-----  
-----CGTGCGGGACGGGGTGTGGGTAGGCAACGGTGGGC-----  
-----CGGGACGGGGTGTGGGTAGGCAA-----  
-----CGGGACGGGGTGTGGGTAGGCAAC-----  
-----GTGCGGGACGGGGTGTGGGTAGGCAAC-----  
-----CGTGCGGGACGGGGTGTGGGTAGGCA-----  
-----TGCGGGACGGGGTGTGGGTAGG-----  
-----GGACGGGGTGTGGGTAGGCAACGGTGGGCTC-----  
-----GGGACGGGGTGTGGGTAGGCAACGGTGGGCTCC-----  
-----GGACGGGGTGTGGGTAGGCAACGGTGGGCTCCC-----  
-----GGACGGGGTGTGGGTAGGCAACGGTGGGCT-----  
-----GCGGGACGGGGTGTGGGTA-----  
-----GTGCGGGACGGGGTGTGGGTAGGCAA-----  
-----GGACGGGGTGTGGGTAGGCAA-----  
-----CGTGCGGGACGGGGTGTGGGTAGGCAACGGT-----  
-----AACGGTGGGCTCCCGGTCCCC-----  
-----CGGTGGGCTCCCGGTCCCCACCC-----  
-----CGGTGGGCTCCCGGTCCCCACCC-----  
-----AACGGTGGGCTCCCGGTCCCCACCC-----  
-----GCAACGGTGGGCTCCCG-----  
-----GGCAACGGTGGGCTCCCG-----  
-----GGCAACGGTGGGCTCCCGGT-----  
-----CAACGGTGGGCTCCCGGTCCCCACCC-----  
-----ACGGTGGGCTCCCGGTCCCCACCC-----  
-----AACGGTGGGCTCCCGGTCCCCACCC-----

>mmu-mir-880

| AACTGTGTGCACTGCAATACTCAGATTGATATGAGTCACTTCCTATTGCATGTTACTCCATCTCTCTGAGTAGAGTAAGGCACACCAATCACCA | species | len | reads |
|------------------------------------------------------------------------------------------------|---------|-----|-------|
| AACTGTGTGCACTGCAATAC-----                                                                      | morL    | 20  | 1     |
| -----GTGTGCACTGCAATACTC-----                                                                   | morL    | 18  | 1     |

```

- ACTGTGTGCACTGCAATA----- morL 18 1
-----AGATTGATATGAGTCACT----- mirL 18 3
-----CTCAGATTGATATGAGTC----- mirL 18 1
-----CAGATTGATATGAGTCA----- mirL 18 1
-----ACTTCCTATTGCATGTTA----- loop 18 1
-----TACTCCATCCTCTCTGAGTAGA----- mirR 22 1091
-----TACTCCATCCTCTCTGAGTAG----- mirR 21 266
-----TACTCCATCCTCTCTGAGTA----- mirR 20 24
-----TACTCCATCCTCTCTGAGT----- mirR 19 19
-----TACTCCATCCTCTCTGAGTAGAG----- mirR 23 15
-----ACTCCATCCTCTCTGAGTAGA----- mirR 21 15
-----CTCCATCCTCTCTGAGTAGA----- mirR 20 14
-----TCCATCCTCTCTGAGTAG----- mirR 18 12
-----ACTCCATCCTCTCTGAGTA----- mirR 19 7
-----TACTCCATCCTCTCTGAG----- mirR 18 7
-----ACTCCATCCTCTCTGAGT----- mirR 18 6
-----ACTCCATCCTCTCTGAGTAG----- mirR 20 6
-----CTCCATCCTCTCTGAGTAG----- mirR 19 3
-----TCCATCCTCTCTGAGTAGA----- mirR 19 1
-----TTACTCCATCCTCTCTGA----- mirR 18 1
-----AAGGCACACCAATCACCA morR 18 1

>mmu-mir-1952
TATTGCAGCCACCTATCCCTCTCTTATTGATCTCCACCCTCCTTCTGTGTCAGGCTTATTTCTGTGCTCCAAGGTGGATGACAAAAGAGATGGAAGTATGGGGGG species len reads
TATTGCAGCCACCTATCC----- morL 18 1
-----TCTTATTGATCTCCACCC----- mirL 18 1375
-----CTTATTGATCTCCACCCT----- mirL 18 3
-----CTCTTATTGATCTCCACC----- mirL 18 2
-----TCTTATTGATCTCCACCCT----- mirL 19 1
-----AAGGTGTGGATGACAAAA----- mirR 18 18
-----AGGTGTGGATGACAAAAG----- mirR 18 1
-----AGGTGTGGATGACAAAAGA----- mirR 19 1
-----GTGTGGATGACAAAAGAG----- mirR 18 1
-----AAGAGATGGAAGTATGGGGGG morR 21 1
-----AAGAGATGGAAGTATGGG--- morR 18 1
-----AGATGGAAGTATGGGGGG morR 18 1

>mmu-mir-137
GCCCTCTGACTCTCTTCGGTGACGGGTATTCTTGGGTGGATAATACGGATTACGTTGTTATTGCTTAAGAATACGCGTAGTCGAGGAGAGTACCAGCGGCA species len reads
-CCCTCTGACTCTCTTCGGTG----- morL 20 6
---TCTGACTCTCTTCGGTGA----- morL 18 2
---CTGACTCTCTTCGGTGAC----- morL 18 2
GCCCTCTGACTCTCTTCG----- morL 18 1
---CTCTGACTCTCTTCGGTG----- morL 18 1
GCCCTCTGACTCTCTTCGGT----- morL 20 1
---TGACTCTCTTCGGTGACG----- morL 18 1

```

```

-----ACGGGTATTCTTGGGTGGATAATA----- mirL 24 4
-----CGGGTATTCTTGGGTGGA----- mirL 18 3
-----TGACGGGTATTCTTGGGT----- mirL 18 2
-----GACGGGTATTCTTGGGT----- mirL 18 2
-----GGGTATTCTTGGGTGGAT----- mirL 18 2
-----ACGGGTATTCTTGGGTGGATAA----- mirL 22 2
-----ACGGGTATTCTTGGGTGGAT----- mirL 20 1
-----ACGGGTATTCTTGGGTGGATAAT----- mirL 23 1
-----ATACGGATTACGTTGTTA----- loop 18 1
-----TTATTGCTTAAGAATACGCGTAG----- mirR 23 308
-----TATTGCTTAAGAATACGCGTAG----- mirR 22 196
-----TATTGCTTAAGAATACGCGTA----- mirR 21 177
-----TATTGCTTAAGAATACGCGT----- mirR 20 87
-----ATTGCTTAAGAATACGCGTAG----- mirR 21 82
-----TATTGCTTAAGAATACGCG----- mirR 19 82
-----ATTGCTTAAGAATACGCGTA----- mirR 20 81
-----TTATTGCTTAAGAATACGCGTA----- mirR 22 60
-----TATTGCTTAAGAATACGCGTAGT----- mirR 23 36
-----TTGCTTAAGAATACGCGTAG----- mirR 20 27
-----TTATTGCTTAAGAATACGCGT----- mirR 21 27
-----ATTGCTTAAGAATACGCGTAGT----- mirR 22 25
-----TTATTGCTTAAGAATACGCGTAGT----- mirR 24 22
-----TTATTGCTTAAGAATACG----- mirR 18 22
-----ATTGCTTAAGAATACGCGT----- mirR 19 21
-----TTGCTTAAGAATACGCGTA----- mirR 19 16
-----ATTGCTTAAGAATACGCG----- mirR 18 16
-----TATTGCTTAAGAATACGC----- mirR 18 8
-----TTATTGCTTAAGAATACGC----- mirR 19 7
-----TTATTGCTTAAGAATACGCGTAGTC----- mirR 25 4
-----ATTGCTTAAGAATACGCGTAGTC----- mirR 23 3
-----TTGCTTAAGAATACGCGT----- mirR 18 2
-----TTGCTTAAGAATACGCGTAGT----- mirR 21 1
-----TATTGCTTAAGAATACGCGTAGTC----- mirR 24 1
-----GTCGAGGAGAGTACCAGC----- morR 18 20
-----TAGTCGAGGAGAGTACCA----- morR 18 14
-----TCGAGGAGAGTACCAGCG----- morR 18 2
-----GAGGAGAGTACCAGCGGCA morR 19 1
-----GTCGAGGAGAGTACCAGCG----- morR 19 1
-----TCGAGGAGAGTACCAGCGG-- morR 19 1

```

```

>mmu-mir-3057
TGAGGTGTCCTGAAGGTGTGTGCATTGGAGCTGAGATTCTGCGGGATGGATTAGGAGTATATTGTCTCCACAGGCCAGCTCATAGCAC species len reads
-----CCTGAAGGTGTGTGCATT----- morL 18 6
--AGGTGTCCTGAAGGTGTGT----- morL 19 3
TGAGGTGTCCTGAAGGTGTGTG----- morL 22 2
--AGGTGTCCTGAAGGTGTG----- morL 18 2

```

```

--AGGTGTCCTGAAGGTGTGTG----- morL 20 1
TGAGGTGTCCTGAAGGTGTGTGC----- morL 23 1
TGAGGTGTCCTGAAGGTGTGT----- morL 21 1
-----ATTGGAGCTGAGATTCTGCGGGATGG----- mirL 26 118
-----ATTGGAGCTGAGATTCTGCGGGATG----- mirL 25 102
-----ATTGGAGCTGAGATTCTGCGGGAT----- mirL 24 87
-----ATTGGAGCTGAGATTCTGCGG----- mirL 21 34
-----ATTGGAGCTGAGATTCTGCG----- mirL 20 32
-----ATTGGAGCTGAGATTCTGCGGG----- mirL 22 24
-----ATTGGAGCTGAGATTCTGCGGGA----- mirL 23 22
-----TGGAGCTGAGATTCTGCGGGATGGAT----- mirL 26 18
-----TTGGAGCTGAGATTCTGCGGGATGGA----- mirL 26 13
-----GGAGCTGAGATTCTGCGGGATGGATTA----- mirL 27 4
-----TGGAGCTGAGATTCTGCG----- mirL 18 3
-----TTGGAGCTGAGATTCTGCGGGATGG----- mirL 25 2
-----TGCATTGGAGCTGAGATT----- mirL 18 1
-----TGGAGCTGAGATTCTGCGG----- mirL 19 1
-----TTGGAGCTGAGATTCTGCGGGA----- mirL 22 1
-----GGAGCTGAGATTCTGCGGGATGG----- mirL 23 1
-----GCATTGGAGCTGAGATTCT----- mirL 18 1
-----GCATTGGAGCTGAGATTCT----- mirL 19 1
-----TTGGAGCTGAGATTCTGCGG----- mirL 20 1
-----TAGGAGTATATTGTCTC----- loop 18 1
-----GGATTAGGAGTATATTGT----- loop 18 1
-----TCCCACAGGCCAGCTCATAGC-- mirR 22 299
-----TCCCACAGGCCAGCTCATAG-- mirR 21 153
-----CTCCCACAGGCCAGCTCATAGC-- mirR 23 138
-----CTCCCACAGGCCAGCTCATAG-- mirR 22 124
-----CTCCCACAGGCCAGCTCATA--- mirR 21 56
-----TCCCACAGGCCAGCTCATAGCA- mirR 23 37
-----TCCCACAGGCCAGCTCATA--- mirR 20 19
-----CTCCCACAGGCCAGCTCATAGCA- mirR 24 18
-----CTCCCACAGGCCAGCTCAT--- mirR 20 14
-----TCCCACAGGCCAGCTCAT--- mirR 19 9
-----CCCACAGGCCAGCTCATAG-- mirR 20 4
-----CTCCCACAGGCCAGCTCATAGCAC mirR 25 4
-----TCCCACAGGCCAGCTCATAGCAC mirR 24 4
-----CCTCCCACAGGCCAGCTCAT--- mirR 21 3
-----CCCACAGGCCAGCTCATAGCA- mirR 22 3
-----TCCCACAGGCCAGCTCA----- mirR 18 3
-----CCTCCCACAGGCCAGCTCATA--- mirR 22 2
-----CCCACAGGCCAGCTCATAGC-- mirR 21 2
-----CTCCCACAGGCCAGCTC----- mirR 18 1
-----CCTCCCACAGGCCAGCTCATAGC-- mirR 24 1
-----CCCACAGGCCAGCTCATA--- mirR 19 1

```

>mmu-mir-694

|                                                                                             | species | len | reads |
|---------------------------------------------------------------------------------------------|---------|-----|-------|
| AACTGGGAGTCAAAGGCCAGCTCAGGCATCGCTTTCAACCCAAGACCAGGCTGAAAATGTTGCCTGAAGCAGTCTCTGCCTTCTGCTTTCA | morL    | 18  | 3     |
| AACTGGGAGTCAAAGGCC-----                                                                     | morL    | 18  | 1     |
| -----TCAGGCATCGCTTTCAAC-----                                                                | mirL    | 18  | 106   |
| -----TCAGGCATCGCTTTCAACC-----                                                               | mirL    | 19  | 2     |
| -----GCTCAGGCATCGCTTTCAACCCA-----                                                           | mirL    | 23  | 2     |
| -----CTCAGGCATCGCTTTCAAC-----                                                               | mirL    | 19  | 1     |
| -----CTGAAAATGTTGCCTGAAG-----                                                               | mirR    | 19  | 798   |
| -----CTGAAAATGTTGCCTGAA-----                                                                | mirR    | 18  | 425   |
| -----CTGAAAATGTTGCCTGAAGCAGT-----                                                           | mirR    | 23  | 19    |
| -----TGAAAATGTTGCCTGAAG-----                                                                | mirR    | 18  | 3     |
| -----GCTGAAAATGTTGCCTGAAG-----                                                              | mirR    | 20  | 2     |
| -----GCTGAAAATGTTGCCTGA-----                                                                | mirR    | 18  | 2     |
| -----CTGAAAATGTTGCCTGAAGCAGTC-----                                                          | mirR    | 24  | 1     |
| -----TCTCTGCCTTCTGCTTTC-----                                                                | morR    | 18  | 7     |
| -----GTCTCTGCCTTCTGCTTTCA-----                                                              | morR    | 20  | 1     |
| -----CAGTCTCTGCCTTCTGCT-----                                                                | morR    | 18  | 1     |

>mmu-mir-1951

|                                                                                                      | species | len | reads |
|------------------------------------------------------------------------------------------------------|---------|-----|-------|
| AGTGCTGTGGGTGGGGGTTTAGAAACCACCTCTCTTCACTTACTTCTGAAAGTTAAAAGGTAGTGGAGACTGGTGTGGCTAAACCTCTTGCCTCCCCATC | morL    | 18  | 3     |
| AGTGCTGTGGGTGGGGGT-----                                                                              | morL    | 20  | 2     |
| ---GCTGTGGGTGGGGGTTTAGA---                                                                           | morL    | 18  | 2     |
| -GTGCTGTGGGTGGGGGTT-----                                                                             | morL    | 19  | 1     |
| ---GCTGTGGGTGGGGGTTTAG---                                                                            | mirL    | 23  | 67    |
| -----GAAACCACCTCTTCACTTACT-----                                                                      | mirL    | 21  | 29    |
| -----AACCACCTCTTCACTTACT-----                                                                        | mirL    | 22  | 28    |
| -----AAACCACCTCTTCACTTACT-----                                                                       | mirL    | 23  | 3     |
| -----AACCACCTCTTCACTTACTTC-----                                                                      | mirL    | 21  | 3     |
| -----GAAACCACCTCTTCACTTA-----                                                                        | mirL    | 22  | 2     |
| -----GAAACCACCTCTTCACTTAC-----                                                                       | mirL    | 24  | 2     |
| -----GAAACCACCTCTTCACTTACTT-----                                                                     | mirL    | 18  | 2     |
| -----ACCACCTCTTCACTTA-----                                                                           | mirL    | 21  | 2     |
| -----AAACCACCTCTTCACTTAC-----                                                                        | mirL    | 18  | 1     |
| -----TAGAAACCACCTCTCTTC-----                                                                         | mirL    | 20  | 1     |
| -----AAACCACCTCTTCACTTA-----                                                                         | mirL    | 20  | 1     |
| -----AGAAACCACCTCTTCACT-----                                                                         | mirL    | 18  | 1     |
| -----AACCACCTCTTCACTT-----                                                                           | mirL    | 23  | 1     |
| -----AAACCACCTCTTCACTTACTT-----                                                                      | mirL    | 20  | 1     |
| -----AACCACCTCTTCACTTAC-----                                                                         | loop    | 18  | 10    |
| -----ACTTCTGAAAGTTAAAAG-----                                                                         | loop    | 18  | 2     |
| -----CTTCTGAAAGTTAAAAGG-----                                                                         | loop    | 18  | 1     |
| -----TTCTGAAAGTTAAAAGGT-----                                                                         | loop    | 18  | 1     |
| -----TCTGAAAGTTAAAAGGTA-----                                                                         | loop    | 18  | 1     |
| -----ACTTCTGAAAGTTAAAAGGT-----                                                                       | loop    | 20  | 1     |
| -----ACTTCTGAAAGTTAAAAGG-----                                                                        | loop    | 19  | 1     |

```

-----GTAGTGGAGACTGGTGTGGCTA----- mirR 22 1089
-----GTAGTGGAGACTGGTGTGGCT----- mirR 21 40
-----TAGTGGAGACTGGTGTGGCTA----- mirR 21 14
-----AGTGGAGACTGGTGTGGCTA----- mirR 20 11
-----GGTAGTGGAGACTGGTGTGGCTA----- mirR 23 7
-----AGTGGAGACTGGTGTGGCT----- mirR 19 6
-----GTGGAGACTGGTGTGGCTA----- mirR 19 6
-----GTAGTGGAGACTGGTGTGGC----- mirR 20 5
-----AAGGTAGTGGAGACTGGT----- mirR 18 4
-----GTAGTGGAGACTGGTGTGGCTAAAC----- mirR 25 4
-----GGTAGTGGAGACTGGTGTGGCTAA----- mirR 24 3
-----GTAGTGGAGACTGGTGTGGCTAA----- mirR 23 2
-----TAGTGGAGACTGGTGTGGCT----- mirR 20 2
-----TAGTGGAGACTGGTGTGGCTAAACC----- mirR 25 2
-----GTGGAGACTGGTGTGGCT----- mirR 18 2
-----AGGTAGTGGAGACTGGTG----- mirR 18 1
-----GTAGTGGAGACTGGTGTGGCTAAA----- mirR 24 1
-----GGTAGTGGAGACTGGTGT----- mirR 18 1
-----GGTAGTGGAGACTGGTGTGGCT----- mirR 22 1
-----ACCTCTGCCTCCCCATC morR 18 1

```

>mmu-mir-693

```

GTTGTAGGCATGCTCATTACAGCCACATCCGAAAGTTTTCTGGCTAGGGCAGCTTTCAGATGTGGCTGTAATGAGCATGCTCCAGCAAC species len reads
-----TAGGCATGCTCATTACAG----- morL 18 1
GTTGTAGGCATGCTCATTAC----- morL 19 1
-----CAGCCACATCCGAAAGTTTTCT----- mirL 21 930
-----CAGCCACATCCGAAAGTTTT----- mirL 20 150
-----CAGCCACATCCGAAAGTTT----- mirL 19 53
-----CAGCCACATCCGAAAGTT----- mirL 18 33
-----AGCCACATCCGAAAGTTTTCT----- mirL 20 25
-----ACAGCCACATCCGAAAGTTTTCT----- mirL 23 8
-----ACAGCCACATCCGAAAGTTTTCT----- mirL 22 7
-----CCACATCCGAAAGTTTTCT----- mirL 18 6
-----GCCACATCCGAAAGTTTTCT----- mirL 19 3
-----ACAGCCACATCCGAAAGTTTTCTCT----- mirL 24 3
-----ACAGCCACATCCGAAAGT----- mirL 18 2
-----GCCACATCCGAAAGTTTT----- mirL 18 2
-----CAGCCACATCCGAAAGTTTTCT----- mirL 22 2
-----CAGCCACATCCGAAAGTTTTCTCT----- mirL 23 1
-----AGCCACATCCGAAAGTTTTCTCT----- mirL 22 1
-----GCAGCTTTCAGATGTGGCTGTAA----- mirR 23 37
-----GCAGCTTTCAGATGTGGCT----- mirR 19 22
-----AGCTTTCAGATGTGGCTGTAA----- mirR 21 16
-----GCTTTCAGATGTGGCTGTAA----- mirR 20 14
-----GGGCAGCTTTCAGATGTG----- mirR 18 14
-----GCAGCTTTCAGATGTGGCTGT----- mirR 21 12

```

```

-----GCAGCTTTCAGATGTGGC----- mirR 18 3
-----AGGGCAGCTTTCAGATGT----- mirR 18 3
-----GCAGCTTTCAGATGTGGCTGTA----- mirR 22 3
-----CAGCTTTCAGATGTGGCTGTAA----- mirR 22 3
-----GGCAGCTTTCAGATGTGGCTGTAA----- mirR 24 1
-----GCAGCTTTCAGATGTGGCTGTAATG----- mirR 25 1
-----CAGCTTTCAGATGTGGCTGTA----- mirR 21 1
-----GCAGCTTTCAGATGTGGCTGTAAT----- mirR 24 1
-----GGCAGCTTTCAGATGTGG----- mirR 18 1
-----ATGAGCATGCTCCCAGCA-- morR 18 3
-----TGAGCATGCTCCCAGCAAC morR 19 1

```

>mmu-mir-743b

| Sequence                                                                             | species | len | reads |
|--------------------------------------------------------------------------------------|---------|-----|-------|
| GAGGGCAGTATGTTGTGTGCAGTGTGTTTGTGAAATATTTGTGAAAGACATCATGCTGAATAGAGTAAGGCCATGATATCTTCA | morL    | 22  | 2     |
| -AGGGCAGTATGTTGTGTGCAGT-                                                             | morL    | 18  | 2     |
| -----AGTATGTTGTGTGCAGTG-----                                                         | morL    | 18  | 1     |
| --GGGCAGTATGTTGTGTGC-----                                                            | morL    | 18  | 1     |
| GAGGGCAGTATGTTGTGT-----                                                              | morL    | 18  | 1     |
| --GGGCAGTATGTTGTGTGCA-----                                                           | morL    | 19  | 1     |
| -AGGGCAGTATGTTGTGTG-----                                                             | morL    | 18  | 1     |
| -----GTGCTGTGTTTCACTGGTGTGTC-----                                                    | mirL    | 22  | 716   |
| -----GTGCTGTGTTTCACTGGTGTCC-----                                                     | mirL    | 23  | 96    |
| -----GTGCTGTGTTTCACTGGTGT-----                                                       | mirL    | 21  | 21    |
| -----GTGCTGTGTTTCACTGGTGT-----                                                       | mirL    | 20  | 13    |
| -----TGCTGTGTTTCACTGGT-----                                                          | mirL    | 18  | 7     |
| -----GTGCTGTGTTTCACTGGT-----                                                         | mirL    | 19  | 3     |
| -----GTGCTGTGTTTCACTGG-----                                                          | mirL    | 18  | 2     |
| -----GTGCTGTGTTTCACTGGTGTCCAT-----                                                   | mirL    | 25  | 2     |
| -----GCTGTGTTTCACTGGTGTGTC-----                                                      | mirL    | 20  | 1     |
| -----CAGTGCTGTGTTTCACT-----                                                          | mirL    | 18  | 1     |
| -----AGTGCTGTGTTTCACTGGTGT-----                                                      | mirL    | 22  | 1     |
| -----AGTGCTGTGTTTCACTGGT-----                                                        | mirL    | 20  | 1     |
| -----GTCCATCATGTGAAATATTTGT-----                                                     | loop    | 22  | 2     |
| -----CATCATGTGAAATATTTG-----                                                         | loop    | 18  | 1     |
| -----GAAAGACATCATGCTGAATAGA-----                                                     | mirR    | 22  | 277   |
| -----GAAAGACATCATGCTGAATAG-----                                                      | mirR    | 21  | 119   |
| -----GAAAGACATCATGCTGAATA-----                                                       | mirR    | 20  | 43    |
| -----AAGACATCATGCTGAATAGA-----                                                       | mirR    | 20  | 15    |
| -----AAAGACATCATGCTGAATAGA-----                                                      | mirR    | 21  | 7     |
| -----GAAAGACATCATGCTGAA-----                                                         | mirR    | 18  | 7     |
| -----AGACATCATGCTGAATAGA-----                                                        | mirR    | 19  | 6     |
| -----AAGACATCATGCTGAATAG-----                                                        | mirR    | 19  | 2     |
| -----GAAAGACATCATGCTGAAT-----                                                        | mirR    | 19  | 2     |
| -----TGAAAGACATCATGCTGAATAG-----                                                     | mirR    | 22  | 1     |
| -----AAGACATCATGCTGAATA-----                                                         | mirR    | 18  | 1     |
| -----AGGCCATGATATCTTCA-----                                                          | morR    | 19  | 1     |



-----GTAAGGCCCATGATATTCT--- morR 19 1

>mmu-mir-677

```
GCCTTCAGTGATGATTAGCTTCTGACTTTCGTTCTTCTGAATTTGCTGAAGCCAGATGCCGTTCTGAGAAGGGGAAAATGGACAGAACTGAACATTTTTGAAGGCTGTTTAATTTGGGAATGCAGAGATCTGAAATATTT
---TTCAGTGATGATTAGCTTCTG-----
---TTCAGTGATGATTAGCTTCTGA-----
--CTTCAGTGATGATTAGCTTCTGAC-----
--CTTCAGTGATGATTAGCTTCTG-----
--CTTCAGTGATGATTAGCTTCTGA-----
---TTCAGTGATGATTAGCTTCT-----
---TTCAGTGATGATTAGCTTCT-----
---TTCAGTGATGATTAGCTTCT-----
--CTTCAGTGATGATTAGCTTCTGACT-----
---TTCAGTGATGATTAGCTTCTGACT-----
--CTTCAGTGATGATTAGCTTCT-----
--CTTCAGTGATGATTAGCTT-----
-----AGTGATGATTAGCTTCTGACT-----
-----AGTGATGATTAGCTTCTGA-----
--CTTCAGTGATGATTAGCTTCT-----
---TCAGTGATGATTAGCTTCTGA-----
GCCTTCAGTGATGATTAGCTTCTGA-----
-----CAGTGATGATTAGCTTCTGA-----
-----CAGTGATGATTAGCTTCTG-----
-----CAGTGATGATTAGCTTCTGACT-----
--CCTTCAGTGATGATTAGCTTCT-----
--CCTTCAGTGATGATTAGCT-----
-----AGTGATGATTAGCTTCTG-----
--CCTTCAGTGATGATTAGCTTCT-----
---TCAGTGATGATTAGCTTCT-----
---TTCAGTGATGATTAGCTTCTGACTTTCGTTCTTC-----
--CCTTCAGTGATGATTAGCTTCTGACT-----
-----AGTGATGATTAGCTTCTGAC-----
--CCTTCAGTGATGATTAGCTTCTG-----
---CAGTGATGATTAGCTTCTGAC-----
--CCTTCAGTGATGATTAGCTTCTGAC-----
---TCAGTGATGATTAGCTTCTGACTTT-----
---TTCAGTGATGATTAGCTTCTGACTTT-----
-----AGTGATGATTAGCTTCTGACTTTCGTTCTTC-----
--CCTTCAGTGATGATTAGCTTCTGA-----
---TCAGTGATGATTAGCTTCTG-----
GCCTTCAGTGATGATTAGCTTCTGAC-----
GCCTTCAGTGATGATTAGCTTCTGACTTT-----
-----AATATTT
-----AATATTT
-----ATATTT
-----AAATATTT
-----AATATTT
```

-----ATATTT

>mmu-mir-1190  
AGCTGTACGGGTGGGTGAGCATGGCTGACACTCTGAGAGTGTGGTGGCTCTGGGGCCTTTCAGACGTGGGAAGGTCTCTGCTGGCCTGATGCTTCCCCCGTCAGCTGAGGTTCCCCTCTGTCTGGGATGCTGCCTTGA  
-----CGGGTGGGTGAGCATGGC-----  
-----GGGTGGGTGAGCATGGCT-----  
-----TACGGGTGGGTGAGCATG-----  
AGCTGTACGGGTGGGTGAGCATG-----  
-----GACACTCTGAGAGTGTG-----  
-----CACTCTGAGAGTGTGGT-----  
-----ACACTCTGAGAGTGTGG-----  
-----ACTCTGAGAGTGTGGTG-----  
-----CTGACACTCTGAGAGTGT-----  
-----TCAGCTGAGGTTCCCCTCTGTC-----  
-----TCAGCTGAGGTTCCCCTCTGT-----  
-----TCAGCTGAGGTTCCCCTCTG-----  
-----TCAGCTGAGGTTCCCCTCTGTCT-----  
-----CAGCTGAGGTTCCCCTCTGTC-----  
-----TCAGCTGAGGTTCCCCTCT-----  
-----TCAGCTGAGGTTCCCCTCTGTCTG-----  
-----TCAGCTGAGGTTCCCCTC-----  
-----CAGCTGAGGTTCCCCTCTGT-----  
-----GTCAGCTGAGGTTCCCCTCTGT-----  
-----AGCTGAGGTTCCCCTCTGT-----  
-----CGTCAGCTGAGGTTCCCC-----  
-----TCTGGGATGCTGCCTTGA-----  
-----TGGGATGCTGCCTTGA-----

>mmu-mir-343

| Sequence                                                                                                | species | len | reads |
|---------------------------------------------------------------------------------------------------------|---------|-----|-------|
| TGGCACCTCTGTGTACCTGGGATAGAGTGGGTGTGGCGGGGGTAGCAGAGCCCAGGGCAACCTCTCCCTTCATGTGCCAGATCCTGCATGCCAACGTGGTGGT | morL    | 18  | 1     |
| ---ACCTCTGTGTACCTGGGA---                                                                                | morL    | 18  | 1     |
| TGGCACCTCTGTGTACCT                                                                                      | morL    | 18  | 1     |
| ----CTCTGTGTACCTGGGATA----                                                                              | morL    | 18  | 1     |
| ----CCTCTGTGTACCTGGGAT----                                                                              | morL    | 18  | 1     |
| -----ATAGAGTGGGTGTGGCGG-----                                                                            | mirL    | 18  | 2     |
| -----GAGTGGGTGTGGCGGGG-----                                                                             | mirL    | 18  | 2     |
| -----TAGAGTGGGTGTGGCGGG-----                                                                            | mirL    | 19  | 1     |
| -----TAGCAGAGCCCAGGGCAACC-----                                                                          | loop    | 20  | 4     |
| -----GTAGCAGAGCCCAGGGCAAC-----                                                                          | loop    | 20  | 1     |
| -----TCTCCCTTCATGTGCCAG-----                                                                            | mirR    | 20  | 1029  |
| -----TCTCCCTTCATGTGCCAG-----                                                                            | mirR    | 19  | 185   |
| -----TCTCCCTTCATGTGCCA-----                                                                             | mirR    | 18  | 34    |
| -----CTCCCTTCATGTGCCAG-----                                                                             | mirR    | 19  | 27    |
| -----TCCCTTCATGTGCCAG-----                                                                              | mirR    | 18  | 3     |
| -----CTCCCTTCATGTGCCAG-----                                                                             | mirR    | 18  | 2     |
| -----TCTCCCTTCATGTGCCAGAT-----                                                                          | mirR    | 21  | 2     |

```
-----CTCTCCCTTCATGTGCCCA----- mirR 19 1
-----TCCTGCATGCCAACGTGG--- morR 18 13
-----TGCATGCCAACGTGGTGGT morR 19 1
-----CCTGCATGCCAACGTGGT--- morR 18 1
```

>mmu-mir-713

| Species | len | reads |
|---------|-----|-------|
| mirL 18 | 101 |       |
| mirL 19 | 70  |       |
| mirL 18 | 18  |       |
| mirL 18 | 10  |       |
| mirL 18 | 4   |       |
| mirL 18 | 2   |       |
| mirL 19 | 1   |       |
| mirR 18 | 556 |       |
| mirR 19 | 450 |       |
| mirR 18 | 31  |       |
| mirR 20 | 10  |       |
| mirR 18 | 5   |       |
| mirR 18 | 2   |       |
| mirR 22 | 1   |       |
| mirR 19 | 1   |       |
| mirR 18 | 1   |       |
| mirR 20 | 1   |       |
| mirR 19 | 1   |       |
| morR 18 | 1   |       |

>mmu-mir-701

| Species | len | reads |
|---------|-----|-------|
| mirL 19 | 8   |       |
| mirL 20 | 1   |       |
| mirL 21 | 9   |       |
| mirL 18 | 6   |       |
| mirL 22 | 2   |       |
| mirL 18 | 1   |       |
| mirL 29 | 7   |       |
| mirL 19 | 3   |       |
| mirL 22 | 3   |       |
| mirL 19 | 3   |       |
| mirL 20 | 2   |       |
| mirL 24 | 2   |       |
| mirL 23 | 1   |       |
| mirR 19 | 2   |       |
| mirR 18 | 1   |       |
| mirR 18 | 4   |       |
| mirR 20 | 1   |       |

```
-----AGGATAATTATAGCACACT--- mirR 19 1

>mmu-mir-762
TTTGGCCCGGCTCCGGGTCTCGGCCCGCACGGTCCGGCCGGCCATGCTGGCGGGGCTGGGGCCGGGACAGAGCCCGTGGCGGGGCGGCCTGTGGTCCGGCGATCTCAGGCTGAGCGCCAGGCCCC species len r
TTTGGCCCGGCTCCGGGT----- morL 18 4
-----CTCGGCCCGCACGGTCCG----- mirL 18 4
-----CGGCCCGCACGGTCCGGC----- mirL 18 2
-----TCGGGCCCGCACGGTCCGG----- mirL 18 1
-----GGTCTCGGCCCGCACGGT----- mirL 18 1
-----ATCTCAGGCTGAGCGCCA----- mirR 18 1194
-----GCGATCTCAGGCTGAGCG----- mirR 18 29
-----ATCTCAGGCTGAGCGCCAG----- mirR 19 1
-----TCTCAGGCTGAGCGCCAG----- mirR 18 1
-----TCAGGCTGAGCGCCAGGCCCC mirR 21 1
-----CGATCTCAGGCTGAGCGC----- mirR 18 1
-----GCGATCTCAGGCTGAGCGC----- mirR 19 1
-----TCAGGCTGAGCGCCAGGC--- mirR 18 1
```

```
>mmu-mir-544
AACGCTGCTAAGATATTCGTCACCTAGGGATCTTGTTAAAAAGCAGAGTCTGATTGAGGGGCAAGATTCTGCATTTT TAGCAAGCTCTCAAGTGATGCTAATGCTGCC species len reads
-----TCGTCACCTAGGGATCTT----- morL 18 2
-----GATATTCGTCACCTAGGGA----- morL 19 2
AACGCTGCTAAGATATTCGTCACCTAGGGATC----- morL 32 1
-----ATATTCGTCACCTAGGGA----- morL 18 1
-----CTTGTTAAAAAGCAGAGTCT----- mirL 20 17
-----TCTTGTTAAAAAGCAGAGTCT----- mirL 21 9
-----TCTTGTTAAAAAGCAGAGTCTG----- mirL 22 3
-----TTGTTAAAAAGCAGAGTCT----- mirL 19 1
-----ATCTTGTTAAAAAGCAGA----- mirL 18 1
-----ATTCTGCATTTT TAGCAAGCTC----- mirR 22 421
-----ATTCTGCATTTT TAGCAAGCT----- mirR 21 262
-----ATTCTGCATTTT TAGCAAG----- mirR 19 213
-----ATTCTGCATTTT TAGCAAGCTCT----- mirR 23 129
-----ATTCTGCATTTT TAGCAAGC----- mirR 20 60
-----AGATTCTGCATTTT TAGCAAGCT----- mirR 23 20
-----GATTCTGCATTTT TAGCAAGCTC----- mirR 23 19
-----ATTCTGCATTTT TAGCAA----- mirR 18 17
-----TTCTGCATTTT TAGCAAGCTC----- mirR 21 15
-----TTCTGCATTTT TAGCAAG----- mirR 18 10
-----CTGCATTTT TAGCAAGCTC----- mirR 19 8
-----ATTCTGCATTTT TAGCAAGCTCTC----- mirR 24 6
-----TTCTGCATTTT TAGCAAGCT----- mirR 20 5
-----TCTGCATTTT TAGCAAGCTC----- mirR 20 5
-----GATTCTGCATTTT TAGCAAGCT----- mirR 22 2
-----CTGCATTTT TAGCAAGCT----- mirR 18 1
-----AGATTCTGCATTTT TAGCAAG----- mirR 21 1
```

```
-----TCTCAAGTGATGCTAATG----- morR 18 1
-----CTCAAGTGATGCTAATGCTG-- morR 20 1
-----AGTGATGCTAATGCTGCC morR 18 1
```

>mmu-mir-464

```
AACCTTGTATGGGGTCTGGGGTAAGGAGTGGTCATCAGGGGGTACTACCAAGTTTATTCTGTGAGATAGACACAAAGAACTGTATATTC species len reads
-----TGTATGGGGTCTGGGG----- morL 18 1
AACCTTGTATGGGGTCTGGGG----- morL 18 1
AACCTTGTATGGGGTCTGGGG----- morL 23 1
AACCTTGTATGGGGTCTGGG----- morL 22 1
-----GGGTAAGGAGTGGTCATC----- mirL 18 4
-----TGGGGTAAGGAGTGGTCA----- mirL 18 2
-----TGGGGTAAGGAGTGGTCAT----- mirL 19 1
-----TACCAAGTTTATTCTGTGAGATA----- mirR 23 590
-----TACCAAGTTTATTCTGTGAGA----- mirR 21 259
-----TACCAAGTTTATTCTGTGA----- mirR 19 158
-----TACCAAGTTTATTCTGTGAGAT----- mirR 22 89
-----TACCAAGTTTATTCTGTGAG----- mirR 20 54
-----ACCAAGTTTATTCTGTGAGA----- mirR 20 23
-----ACCAAGTTTATTCTGTGAGATA----- mirR 22 17
-----CCAAGTTTATTCTGTGAGATA----- mirR 21 9
-----ACCAAGTTTATTCTGTGA----- mirR 18 7
-----TACCAAGTTTATTCTGTGAGATAG----- mirR 24 3
-----ACCAAGTTTATTCTGTGAG----- mirR 19 3
-----CCAAGTTTATTCTGTGAG----- mirR 18 2
-----TACCAAGTTTATTCTGTG----- mirR 18 2
-----CAAGTTTATTCTGTGAGATA----- mirR 20 1
-----ACTACCAAGTTTATTCTG----- mirR 18 1
-----TAGACACAAAGAACTGTA----- morR 18 1
-----ACAAAGAACTGTATATTC morR 18 1
```

>mmu-mir-1187

```
CGAACTGTTTTCCTTATAGACACAATTTATTTTACACACACACACACACATATATATATATATGTGTGTGTGTATGTGTGTAATAACAATGTTAAATAGTAATGAGCCATGCTTAAGATCTGAGCATA species
CGAACTGTTTTCCTTATAG----- morL 19
---ACTGTTTTCCTTATAGAC----- morL 18
-----GTTTTCCTTATAGACACA----- morL 18
-----CAATTTATTTTACACAC----- mirL 18
-----ACAATTTATTTTACACA----- mirL 18
-----ACAATTTATTTTACACAC----- mirL 19
-----TTTATTTTACACACACACACAC----- mirL 25
-----TTTATTTTACACACACACAC----- mirL 21
-----TTTATTTTACACACACACA----- mirL 22
-----TTTATTTTACACACACAC----- mirL 19
-----CAATTTATTTTACACACA----- mirL 19
-----ACACAATTTATTTTACACACA----- mirL 22
-----TAAATAGTAATGAGCCA----- mirR 18
```

-----GCTTAAGATCTGAGCATA morR 18  
 -----ATGCTTAAGATCTGAGCA-- morR 18

>mmu-mir-1967

| AAATTAATGCCTGAATTCTGTTTCTTTCTCTCTTTGCTCCTTTTGTCTGACATTCATGAGGATCCTGGGGAGAAGATGCAGAATTCCTGGAAATTGA | species | len | reads |
|---------------------------------------------------------------------------------------------------|---------|-----|-------|
| -----ATGCCTGAATTCTGTTTC-----                                                                      | morL    | 18  | 3     |
| AAATTAATGCCTGAATTC-----                                                                           | morL    | 18  | 1     |
| -AATTAATGCCTGAATTCT-----                                                                          | morL    | 18  | 1     |
| -----TTCTTTCTCTCTTTGCTCCTTTT-----                                                                 | mirL    | 23  | 4     |
| -----TTTCTCTCTTTGCTCCTT-----                                                                      | mirL    | 18  | 3     |
| -----TCTTTCTCTCTTTGCTCCT-----                                                                     | mirL    | 19  | 1     |
| -----GTTTCTTTCTCTCTTTGCT-----                                                                     | mirL    | 18  | 1     |
| -----TTTCTCTCTTTGCTCCTTTTGT-----                                                                  | mirL    | 22  | 1     |
| -----GTTTCTTTCTCTCTTTGCT-----                                                                     | mirL    | 19  | 1     |
| -----TGTTTCTTTCTCTCTTTG-----                                                                      | mirL    | 18  | 1     |
| -----TTCTTTCTCTCTTTGCTCC-----                                                                     | mirL    | 19  | 1     |
| -----TGAGGATCCTGGGGAGAAGATGC-----                                                                 | mirR    | 23  | 596   |
| -----TGAGGATCCTGGGGAGAAGATG-----                                                                  | mirR    | 22  | 304   |
| -----TGAGGATCCTGGGGAGAAG-----                                                                     | mirR    | 19  | 70    |
| -----TGAGGATCCTGGGGAGAAGA-----                                                                    | mirR    | 20  | 59    |
| -----TGAGGATCCTGGGGAGAA-----                                                                      | mirR    | 18  | 44    |
| -----TGAGGATCCTGGGGAGAAGAT-----                                                                   | mirR    | 21  | 37    |
| -----GGATCCTGGGGAGAAGATG-----                                                                     | mirR    | 19  | 18    |
| -----GAGGATCCTGGGGAGAAGATGC-----                                                                  | mirR    | 22  | 13    |
| -----AGGATCCTGGGGAGAAGATGC-----                                                                   | mirR    | 21  | 10    |
| -----GGATCCTGGGGAGAAGATGC-----                                                                    | mirR    | 20  | 7     |
| -----AGGATCCTGGGGAGAAGATGCAGA-----                                                                | mirR    | 24  | 3     |
| -----GAGGATCCTGGGGAGAAGATG-----                                                                   | mirR    | 21  | 3     |
| -----TGAGGATCCTGGGGAGAAGATGCAG-----                                                               | mirR    | 25  | 2     |
| -----GAGGATCCTGGGGAGAAGAT-----                                                                    | mirR    | 20  | 2     |
| -----AGGATCCTGGGGAGAAGATG-----                                                                    | mirR    | 20  | 1     |
| -----GAGGATCCTGGGGAGAAG-----                                                                      | mirR    | 18  | 1     |
| -----TGCAGAATTCCTGGAAATTC-----                                                                    | morR    | 20  | 2     |
| -----AGAATTCCTGGAAATTCGA-----                                                                     | morR    | 19  | 1     |
| -----GCAGAATTCCTGGAAATTC-----                                                                     | morR    | 19  | 1     |
| -----TGCAGAATTCCTGGAAATTC-----                                                                    | morR    | 18  | 1     |

>mmu-mir-1932

| CTGCAGGCAGCCGGTCCAGCCTGGCCCTGAGTCTCCGACCCCATTAACCTCTCGGGTTGCGGACAGCGCTAGGTGCGCCCTGCTCCCCAGCAACACCC | species | len | reads |
|----------------------------------------------------------------------------------------------------|---------|-----|-------|
| -----AGGCAGCCGGTCCAGCCT-----                                                                       | morL    | 18  | 3     |
| CTGCAGGCAGCCGGTCCAGC-----                                                                          | morL    | 20  | 2     |
| CTGCAGGCAGCCGGTCCAGCC-----                                                                         | morL    | 21  | 2     |
| -----GCAGGCAGCCGGTCCAGCC-----                                                                      | morL    | 19  | 1     |
| -----CAGCCGGTCCAGCCTGGC-----                                                                       | morL    | 18  | 1     |
| -----GCAGGCAGCCGGTCCAGC-----                                                                       | morL    | 18  | 1     |
| -----AGGCAGCCGGTCCAGCCTG-----                                                                      | morL    | 19  | 1     |

```

-----GCCCTGAGTCTCCGACCC----- mirL 18 6
-----CCCATTAACTCTCGGGT----- loop 18 5
-----CCCATTAACTCTCGGGTT----- loop 18 1
-----GTTGCGGACAGCGCTAGGTCGG----- mirR 22 574
-----GTTGCGGACAGCGCTAGGTCG----- mirR 21 341
-----GTTGCGGACAGCGCTAGGT----- mirR 19 116
-----GTTGCGGACAGCGCTAGGTC----- mirR 20 13
-----GCGGACAGCGCTAGGTCGG----- mirR 19 10
-----GTTGCGGACAGCGCTAGGTCGGCCCT----- mirR 26 5
-----GTTGCGGACAGCGCTAGGTCGGC----- mirR 23 4
-----GCGGACAGCGCTAGGTCG----- mirR 18 4
-----TTGCGGACAGCGCTAGGTCGGC----- mirR 22 3
-----GGTTGCGGACAGCGCTAGGTCGG----- mirR 23 2
-----GTTGCGGACAGCGCTAGGTCGGCCCTGC----- mirR 28 1
-----GGGTTGCGGACAGCGCTA----- mirR 18 1
-----GGTTGCGGACAGCGCTAGGTC----- mirR 21 1
-----TTGCGGACAGCGCTAGGTCGG----- mirR 21 1
-----TTGCGGACAGCGCTAGGTC----- mirR 19 1
-----CCTGCTCCCCAGCAACAC-- morR 18 6
-----GCCCTGCTCCCCAGCAAC-- morR 18 3
-----TGCTCCCCAGCAACACCC morR 18 2
-----CGGCCCTGCTCCCCAGCA----- morR 18 1

```

>mmu-mir-1264

```

TTCTTCATGCCTGGCATATAGCAGGTCCTCAATAAGTATTTGTTGAAAAATAAATGAAGCAACAAATCTTATTTGAGCACCTGTTATGTGGAGGATAAAAAAC species len reads
TTCTTCATGCCTGGCATA----- morL 18 1
-----GCAGGTCCTCAATAAGTA----- mirL 18 5
-----GGTCCTCAATAAGTATTT----- mirL 18 1
-----ATAGCAGGTCCTCAATAA----- mirL 18 1
-----CAAATCTTATTTGAGCACCTGT----- mirR 22 618
-----CAAATCTTATTTGAGCACCTG----- mirR 21 251
-----CAAATCTTATTTGAGCACCTGTT----- mirR 23 167
-----AAATCTTATTTGAGCACCTGT----- mirR 21 10
-----CAAATCTTATTTGAGCACCT----- mirR 20 9
-----ATCTTATTTGAGCACCTGT----- mirR 19 8
-----CAAATCTTATTTGAGCAC----- mirR 18 8
-----AAATCTTATTTGAGCAC----- mirR 18 5
-----AATCTTATTTGAGCACCTGTT----- mirR 21 3
-----AATCTTATTTGAGCACCTG----- mirR 19 3
-----AATCTTATTTGAGCACCTGT----- mirR 20 3
-----ATCTTATTTGAGCACCTG----- mirR 18 3
-----AAATCTTATTTGAGCACCTGTT----- mirR 22 1
-----ATGTGGAGGATAAAAAAC morR 18 3
-----GTTATGTGGAGGATAAAA-- morR 18 1
-----GTTATGTGGAGGATAAAAA-- morR 19 1

```

>mmu-mir-883b

```

AATATTCTGTGTGCAATGCATTACTGAGAATGGGTAGCAGTCACCTTTGTACTATGAGTAACTGCAACATCTCTCAGTATTGTAAGGTTCAACAAAT species len reads
AATATTCTGTGTGCAATG-----
-----TACTGAGAATGGGTAGCAGTCA-----
-----TACTGAGAATGGGTAGCAGTC-----
-----ACTGAGAATGGGTAGCAGTCA-----
-----TACTGAGAATGGGTAGCAGTCAC-----
-----CTGAGAATGGGTAGCAGTCA-----
-----TACTGAGAATGGGTAGCA-----
-----TACTGAGAATGGGTAGCAGTCACTT-----
-----TACTGAGAATGGGTAGCAGT-----
-----TACTGAGAATGGGTAGCAGTCACT-----
-----CTGAGAATGGGTAGCAGTC-----
-----TGAGAATGGGTAGCAGTC-----
-----TCACTTTGTACTATGAGTA-----
-----TAACTGCAACATCTCTCAGTAT-----
-----TAACTGCAACATCTCTCAGTATT-----
-----TAACTGCAACATCTCTCAGTA-----
-----TAACTGCAACATCTCTCAGT-----
-----TAACTGCAACATCTCTCAG-----
-----AACTGCAACATCTCTCAGTATT-----
-----ACTGCAACATCTCTCAGTAT-----
-----ACTGCAACATCTCTCAGTA-----
-----ACTGCAACATCTCTCAGT-----
-----CTGCAACATCTCTCAGTA-----
-----TAACTGCAACATCTCTCAGTATTG-----
-----GTAAGTCAACATCTCTC-----
-----CTGCAACATCTCTCAGTAT-----
-----AACTGCAACATCTCTCAGT-----
-----GTAAGTCAACATCTCTCA-----
-----TAACTGCAACATCTCTCA-----
-----ATTGTAAGGTTCAACAAA-----
-----TATTGTAAGGTTCAACAAA-----
-----TATTGTAAGGTTCAACAAAT-----

```

>mmu-mir-1937a

```

TTGGGGTTCTGGGTGCTCCCAAATCCCGGACGAGCCCCAAATGTAGGACCCCCCAATATGGCGACTCCCACTCTAATCCAGGGATAGGGTGCACCCACGAACACGCAAGAATCCCTCTTGTGTG species len r
TTGGGGTTCTGGGTGCTC-----
-TGGGGTTCTGGGTGCTCC-----
-----CCAAATCCCGGACGAGCCCCCA-----
-----CAAATCCCGGACGAGCCCCAAAT-----
-----CAAATCCCGGACGAGCCCCAAA-----
-----CCCAAATCCCGGACGAGCCCCCA-----
-----TCCCAAATCCCGGACGAGCCCCCA-----
-----CAAATCCCGGACGAGCCCCAA-----
-----CCAAATCCCGGACGAGCCCCCA-----

```



```

-----AAATCCCGGACGAGCCCCAA----- mirL 21 13
-----CCCAAATCCCGGACGAGCCCC----- mirL 22 12
-----AAATCCCGGACGAGCCCCAAATG----- mirL 24 6
-----CCCAAATCCCGGACGAGCCCCAAA----- mirL 24 6
-----AAATCCCGGACGAGCCCCAAA----- mirL 22 4
-----CCCAAATCCCGGACGAGCCCC----- mirL 21 4
-----CCCAAATCCCGGACGAGCCCC----- mirL 21 3
-----TCCCAAATCCCGGACGAGCCCC----- mirL 22 2
-----CAAATCCCGGACGAGCCCCAAATG----- mirL 25 2
-----TCCCAAATCCCGGACGAGCCCC----- mirL 23 1
-----CTCCCAAATCCCGGACGAGCCCCA----- mirL 25 1
-----CCCAAATCCCGGACGAGCCCC----- mirL 20 1
-----TAGGGTGCACCCACGAAC----- mirR 18 10
-----ATAGGGTGCACCCACGAAC----- mirR 19 2
-----GGTGCACCCACGAACACG----- mirR 18 1
-----GGATAGGGTGCACCCACG----- mirR 18 1
-----CAAGAATCCCTCTTGTG----- morR 18 1
-----GCAAGAATCCCTCTTGT----- morR 18 1
-----ACGCAAGAATCCCTCTTG----- morR 18 1

```

>mmu-mir-344b

```

CCAGGATTTTCATCAGTCAGGCTCCTGGCTAAAGTTCAGCTTTCAGCTGCATTTAGCCAAAGCCTGACTGTAAGCTGCTCCAGACAAGGA species len reads
CCAGGATTTTCATCAGTC----- morL 18 2
--AGGATTTTCATCAGTCAGG----- morL 19 1
----ATTTTCATCAGTCAGGCT----- morL 18 1
-----CTCCTGGCTAAAGTTCAGCT----- mirL 20 1
-----TCCTGGCTAAAGTTCAGC----- mirL 18 1
-----CATTAGCCAAAGCCTGACTGT----- mirR 22 887
-----CATTAGCCAAAGCCTGACTGTAA----- mirR 24 62
-----CATTAGCCAAAGCCTGACTGTA----- mirR 23 35
-----CATTAGCCAAAGCCTGAC----- mirR 19 13
-----GCATTAGCCAAAGCCTGACTGT----- mirR 23 12
-----CATTAGCCAAAGCCTGACT----- mirR 20 12
-----CATTAGCCAAAGCCTGACTG----- mirR 21 9
-----ATTTAGCCAAAGCCTGACTGT----- mirR 21 9
-----CATTAGCCAAAGCCTGA----- mirR 18 6
-----TTTAGCCAAAGCCTGACTGT----- mirR 20 2
-----ATTTAGCCAAAGCCTGAC----- mirR 18 2
-----TTAGCCAAAGCCTGACTGTAAGC----- mirR 23 2
-----TTAGCCAAAGCCTGACTG----- mirR 18 2
-----ATTTAGCCAAAGCCTGACTG----- mirR 20 1
-----TGCATTAGCCAAAGCCTGACTGT----- mirR 24 1
-----TTAGCCAAAGCCTGACTGT----- mirR 19 1
-----AGCTGCTCCAGACAAGGA morR 18 1

```

>mmu-mir-133b

| CTGCAGTCACCTCCAAAGGGAGTGGCCCCCTGCTCTGGCTGGTCAAACGGAACCAAGTCCGTCTTCTGAGAGGTTTGGTCCCCTTCAACCAGCTACAGCAGGGCTGGCAAAGCTCAA | species | len | reads |
|-----------------------------------------------------------------------------------------------------------------------|---------|-----|-------|
| -----ACCTCCAAAGGGAGTGGC-----                                                                                          | morL    | 18  | 1     |
| -----CCTCCAAAGGGAGTGGCC-----                                                                                          | morL    | 18  | 1     |
| CTGCAGTCACCTCCAAAGGGAG-----                                                                                           | morL    | 22  | 1     |
| -----CCCCCTGCTCTGGCTGGT-----                                                                                          | mirL    | 18  | 5     |
| -----CCCCCTGCTCTGGCTGGTC-----                                                                                         | mirL    | 19  | 2     |
| -----GCCCCCTGCTCTGGCTGG-----                                                                                          | mirL    | 18  | 2     |
| -----CCCCCTGCTCTGGCTGGTC-----                                                                                         | mirL    | 18  | 2     |
| -----CCCCCTGCTCTGGCTGGTCAAAC-----                                                                                     | mirL    | 22  | 1     |
| -----GCCCCCTGCTCTGGCTGGT-----                                                                                         | mirL    | 19  | 1     |
| -----CCCCCTGCTCTGGCTGGTCA-----                                                                                        | mirL    | 20  | 1     |
| -----TTGGTCCCCTTCAACCAGCTA-----                                                                                       | mirR    | 21  | 364   |
| -----TTTGGTCCCCTTCAACCAGCTA-----                                                                                      | mirR    | 22  | 353   |
| -----GGTCCCCTTCAACCAGCTA-----                                                                                         | mirR    | 19  | 147   |
| -----TTGGTCCCCTTCAACCAGCTAC-----                                                                                      | mirR    | 22  | 55    |
| -----TTTGGTCCCCTTCAACCAGCTAC-----                                                                                     | mirR    | 23  | 26    |
| -----TGGTCCCCTTCAACCAGCTA-----                                                                                        | mirR    | 20  | 26    |
| -----GTCCCCTTCAACCAGCTA-----                                                                                          | mirR    | 18  | 24    |
| -----TTGGTCCCCTTCAACCAGCTACA-----                                                                                     | mirR    | 23  | 9     |
| -----TTTGGTCCCCTTCAACCAGCTACAGCAG-----                                                                                | mirR    | 28  | 8     |
| -----TGGTCCCCTTCAACCAGCTAC-----                                                                                       | mirR    | 21  | 7     |
| -----TTTGGTCCCCTTCAACCAGCTACA-----                                                                                    | mirR    | 24  | 7     |
| -----GGTCCCCTTCAACCAGCTAC-----                                                                                        | mirR    | 20  | 2     |
| -----TGGTCCCCTTCAACCAGCTACA-----                                                                                      | mirR    | 22  | 1     |
| -----GTTTGGTCCCCTTCAACC-----                                                                                          | mirR    | 18  | 1     |
| -----TTTGGTCCCCTTCAACCAGCTACAGCAGG-----                                                                               | mirR    | 29  | 1     |
| -----GGTTTGGTCCCCTTCAACC-----                                                                                         | mirR    | 19  | 1     |
| -----TACAGCAGGGCTGGCAAAG-----                                                                                         | morR    | 19  | 1     |
| -----ACAGCAGGGCTGGCAAAG-----                                                                                          | morR    | 18  | 1     |
| -----CAGCAGGGCTGGCAAAGCTCAA-----                                                                                      | morR    | 22  | 1     |
| -----CAGGGCTGGCAAAGCTCA-----                                                                                          | morR    | 18  | 1     |

>mmu-mir-709

| CCCACAGAGTAATTAGTGTGTCCCCTTCTCTGCTTCTACTCAGAAGTGTCTGAGCATAGAAGTGTCTTGTGTTGAGCAGCACTGGGGAGGCAGAGGCAGGAGGATTGTCTTTTGTATATTGAC | species | len | r   |
|-----------------------------------------------------------------------------------------------------------------------------|---------|-----|-----|
| CCCACAGAGTAATTAGTGTGTCCCCTTCTCTGCTTCTACTCAGAAGTGTCTGAGCATAGAAGTGTCTTGTGTTGAGCAGCACTGGGGAGGCAGAGGCAGGAGGATTGTCTTTTGTATATTGAC | morL    | 18  | 1   |
| -----ACAGAGTAATTAGTGTGTC-----                                                                                               | morL    | 19  | 1   |
| -----GTCCCCTTCTCTGCTTCT-----                                                                                                | mirL    | 18  | 18  |
| -----CCGTTTCTCTGCTTCTACT-----                                                                                               | mirL    | 18  | 1   |
| -----GGAGGCAGAGGCAGGAGGA-----                                                                                               | mirR    | 19  | 173 |
| -----GAGGCAGAGGCAGGAGGATTG-----                                                                                             | mirR    | 21  | 94  |
| -----GGAGGCAGAGGCAGGAGGATTGTC-----                                                                                          | mirR    | 24  | 55  |
| -----GGAGGCAGAGGCAGGAGGATTG-----                                                                                            | mirR    | 22  | 53  |
| -----GGGAGGCAGAGGCAGGAGGATTG-----                                                                                           | mirR    | 23  | 47  |
| -----GAGGCAGAGGCAGGAGGATTGTCT-----                                                                                          | mirR    | 24  | 46  |
| -----GAGGCAGAGGCAGGAGGATTGTCTT-----                                                                                         | mirR    | 25  | 43  |
| -----GGAGGCAGAGGCAGGAGGATTGTCTT-----                                                                                        | mirR    | 26  | 40  |

```

-----GGAGGCAGAGGCAGGAGGATT----- mirR 21 39
-----GGCAGAGGCAGGAGGATTGTCTT----- mirR 23 35
-----AGGCAGAGGCAGGAGGATTGTC----- mirR 22 30
-----AGGCAGAGGCAGGAGGAT----- mirR 18 30
-----GGAGGCAGAGGCAGGAGGAT----- mirR 20 26
-----GGCAGAGGCAGGAGGATTGTCT----- mirR 22 24
-----GAGGCAGAGGCAGGAGGATTGTC----- mirR 23 24
-----GAGGCAGAGGCAGGAGGA----- mirR 18 20
-----AGGCAGAGGCAGGAGGATTGTCTT----- mirR 24 19
-----GGAGGCAGAGGCAGGAGGATTGTCT----- mirR 25 18
-----AGGCAGAGGCAGGAGGATTG----- mirR 20 17
-----GGGAGGCAGAGGCAGGAGGAT----- mirR 21 16
-----TGGGGAGGCAGAGGCAGGAGGA----- mirR 22 16
-----TGGGGAGGCAGAGGCAGGAG----- mirR 20 16
-----GAGGCAGAGGCAGGAGGAT----- mirR 19 15
-----AGGCAGAGGCAGGAGGATTGTCTTT----- mirR 26 15
-----GGCAGAGGCAGGAGGATTG----- mirR 19 12
-----GGCAGAGGCAGGAGGATT----- mirR 18 11
-----AGGCAGAGGCAGGAGGATT----- mirR 19 10
-----GGGGAGGCAGAGGCAGGAG----- mirR 19 10
-----GAGGCAGAGGCAGGAGGATT----- mirR 20 10
-----TGGGGAGGCAGAGGCAGG----- mirR 18 5
-----GGGGAGGCAGAGGCAGGAGGATTG----- mirR 24 5
-----GGGAGGCAGAGGCAGGAGGA----- mirR 20 5
-----AGGCAGAGGCAGGAGGATTGTCTTT----- mirR 25 5
-----GGCAGAGGCAGGAGGATTGTC----- mirR 21 4
-----GGGGAGGCAGAGGCAGGA----- mirR 18 4
-----GGCAGAGGCAGGAGGATTGTCTTT----- mirR 25 4
-----GGGGAGGCAGAGGCAGGAGGAT----- mirR 22 3
-----GGGGAGGCAGAGGCAGGAGGATTGTC----- mirR 26 3
-----GGCAGAGGCAGGAGGATTGT----- mirR 20 3
-----TGGGGAGGCAGAGGCAGGAGGAT----- mirR 23 3
-----GGGGAGGCAGAGGCAGGAGGA----- mirR 21 3
-----GGGAGGCAGAGGCAGGAGGATTGT----- mirR 24 2
-----GGGAGGCAGAGGCAGGAG----- mirR 18 2
-----TGGGGAGGCAGAGGCAGGAGGATTG----- mirR 25 2
-----TGGGGAGGCAGAGGCAGGAGG----- mirR 21 1
-----GGGGAGGCAGAGGCAGGAGGATT----- mirR 23 1
-----TGGGGAGGCAGAGGCAGGAGGATT----- mirR 24 1
-----GATTGTCTTTTGTATATTGAC morR 22 2
-----ATTGTCTTTTGTATATTG-- morR 19 1
-----ATTGTCTTTTGTATATTGA- morR 20 1
-----ATTGTCTTTTGTATATTGAC morR 21 1

```

>mmu-mir-706

CTACAGAGTGAGTTCAGGACAGCCAGGGCTATACAGAGAAACCCTGTCTCAAAAAACAAAAACAAACAAAATTACTTTTAGTAGGTTTATTTTGTGTTTTTGGAGATGGCTTTTTTTTTCCCTTACCCTATATTGTGAAG

-----GAGTTCAGGACAGCCAGGGCTATACAG-----  
-----AGGACAGCCAGGGCTATACAGA-----  
-----GTGAGTTCAGGACAGCCAGGGCTATACAG-----  
-----AGAGTGAGTTCAGGACAGCCAGGGCTA-----  
-----CCAGGACAGCCAGGGCTATACA-----  
-----AGAGTGAGTTCAGGACAGCCAGGGCTATACA-----  
-----TCCAGGACAGCCAGGGCTATA-----  
-----ACAGAGTGAGTTCAGGACAGCCAGGGCTATAC-----  
-----AGGACAGCCAGGGCTATACAG-----  
-----GAGTGAGTTCAGGACAGCCAGGGCTATACAGA-----  
-----ACAGCCAGGGCTATACAG-----  
-----GAGTTCAGGACAGCCAGGGCTATACA-----  
-----GACAGCCAGGGCTATACAGA-----  
-----AGTGAGTTCAGGACAGCCAGGGCTATACAGA-----  
-----GTTCCAGGACAGCCAGGGCTAT-----  
-----AGGACAGCCAGGGCTATAC-----  
-----TCCAGGACAGCCAGGGCTAT-----  
-----CCAGGACAGCCAGGGCTAT-----  
-----GAGTTCAGGACAGCCAGGGCTAT-----  
-----GTTCCAGGACAGCCAGGGCTA-----  
-----CCAGGACAGCCAGGGCTA-----  
-----GAGTGAGTTCAGGACAGCCAGGGCTAT-----  
-----GTTCCAGGACAGCCAGGGCTATAC-----  
-----GTTCCAGGACAGCCAGGGCTATACA-----  
-----AGGACAGCCAGGGCTATACA-----  
-----GTTCCAGGACAGCCAGGGCTATA-----  
CTACAGAGTGAGTTCAGGACAGCCAGGGCTA-----  
-----ACAGCCAGGGCTATACAGA-----  
-----TTCCAGGACAGCCAGGGCTAT-----  
-----GGACAGCCAGGGCTATACAGA-----  
-----AGGACAGCCAGGGCTATA-----  
-----CAGAGTGAGTTCAGGACAGCCAGGGCTATAC-----  
-----AGAGTGAGTTCAGGACAGCCAGGGCTAT-----  
-----GTGAGTTCAGGACAGCCAGGGCTATA-----  
-----GAGTTCAGGACAGCCAGGGCTATACAGA-----  
-----GTGAGTTCAGGACAGCCAGGGCTA-----  
-----AGTTCAGGACAGCCAGGGCTA-----  
-----TTCCAGGACAGCCAGGGCTATA-----  
-----GTTCCAGGACAGCCAGGGCTATACAG-----  
-----TCCAGGACAGCCAGGGCTA-----  
-----GAGTTCAGGACAGCCAGGGCTATAC-----  
-----TCCAGGACAGCCAGGGCTATACAG-----  
-----GAGTGAGTTCAGGACAGCCAGGGCTATAC-----  
-----GAGTGAGTTCAGGACAGCCAGGGCTATA-----  
-----GACAGCCAGGGCTATACA-----  
CTACAGAGTGAGTTCAGGACAGCCAGGGCTATAC-----

```
-----GGACAGCCAGGGCTATACAG-----
-----CAGGACAGCCAGGGCTATA-----
-----GGACAGCCAGGGCTATACA-----
-----AGAGAAACCTGTCTCAAAAAA-----
-----TACAGAGAAACCTGTCTCA-----
-----TACAGAGAAACCTGTCTCAA-----
-----AGAGAAACCTGTCTCAAAAAAC-----
-----AGAGAAACCTGTCTCAAAAA-----
-----GAAACCCTGTCTCAAAAA-----
-----AGAAACCTGTCTCAAAAAA-----
-----TACAGAGAAACCTGTCTCAAAA-----
-----TACAGAGAAACCTGTCTCAAA-----
-----CAGAGAAACCTGTCTCAAA-----
-----GAAACCCTGTCTCAAAAAA-----
-----GAGAAACCTGTCTCAAAAAA-----
-----TACAGAGAAACCTGTCTCAAAAA-----
-----ACAGAGAAACCTGTCTCAAAAAAC-----
-----AGAAACCTGTCTCAAAAA-----
-----TACAGAGAAACCTGTCTCAAAAAACAAAA-----
-----AGAGAAACCTGTCTCAAA-----
-----TACAGAGAAACCTGTCT-----
-----GAGAAACCTGTCTCAAAAAAC-----
-----ACAGAGAAACCTGTCTCAAAA-----
-----AGAGAAACCTGTCTCAAAAAACAAAAA-----
-----GAGAAACCTGTCTCAAA-----
-----ACAGAGAAACCTGTCTCAAAAA-----
-----AGAAACCTGTCTCAAAAAAC-----
-----ACAGAGAAACCTGTCTCAAAAAACAAA-----
-----GAAACCCTGTCTCAAAAAACAAAA-----
-----GAGAAACCTGTCTCAAAAAACAAAA-----
-----CAGAGAAACCTGTCTCAAAAAACAAAAA-----
-----AGAGAAACCTGTCTCAAAA-----
-----GAAACCCTGTCTCAAAAAAC-----
-----CAGAGAAACCTGTCTCAAAAAA-----
-----ACAGAGAAACCTGTCTCAAA-----
-----TATTGTGAAG-----
-----ATTGTGAAG-----
-----ATTGTGAAG-----
-----TATTGTGAAG-----
-----ATATTGTGAAG-----
-----CTATATTGTGAAG-----
-----TTGTGAAG-----
-----ATTGTGAAG-----
-----CTATATTGTGAAG-----
-----TATATTGTGAAG-----
-----TATTGTGAAG-----
```

>mmu-mir-3066

```

GTAGTGTGGTATGTTTGGTTGCTGTAGATTAAGTAGTTTAATATGATGCTGCACCTTAATAGACCGCAACCTGCCTGGCCATGCTCTGGGCTG species len reads
GTAGTGTGGTATGTTTGGTTGCTGTAGATTAAGTAGTTT----- morL 18 1
-----TTGGTTGCTGTAGATTAAGTAGT----- mirL 23 169
-----TTGGTTGCTGTAGATTAAGTAG----- mirL 22 32
-----TGGTTGCTGTAGATTAAGTAG----- mirL 22 29
-----TTGGTTGCTGTAGATTAAGTAGTT----- mirL 24 15
-----TTTGGTTGCTGTAGATTAAGT----- mirL 21 14
-----TTTGGTTGCTGTAGATTAAGTAGT----- mirL 24 9
-----TTTGGTTGCTGTAGATTAAGTA----- mirL 22 8
-----TGGTTGCTGTAGATTAAGTAG----- mirL 21 5
-----TGGTTGCTGTAGATTAAGTAGTT----- mirL 23 4
-----GGTTGCTGTAGATTAAGTAGT----- mirL 21 4
-----TTGGTTGCTGTAGATTAAGTA----- mirL 21 3
-----GGTTGCTGTAGATTAAGTA----- mirL 19 2
-----GGTTGCTGTAGATTAAGT----- mirL 18 1
-----TTTTGGTTGCTGTAGATTA----- mirL 19 1
-----TTGGTTGCTGTAGATTA----- mirL 18 1
-----GGTTGCTGTAGATTAAGTAGTT----- mirL 22 1
-----TGGTTGCTGTAGATTAAG----- mirL 18 1
-----CACTTAATAGACCGCAACCTGC----- mirR 22 555
-----CACTTAATAGACCGCAACCTG----- mirR 21 50
-----CACTTAATAGACCGCAACCTGCA----- mirR 23 35
-----ACTTAATAGACCGCAACCTGCA----- mirR 22 29
-----TTAATAGACCGCAACCTGCAC----- mirR 21 18
-----TGCACCTTAATAGACCGCAACCTG----- mirR 23 17
-----CACTTAATAGACCGCAACCT----- mirR 20 14
-----TGCACCTTAATAGACCGCAACCTGC----- mirR 24 9
-----ACTTAATAGACCGCAACCTGC----- mirR 21 7
-----CACTTAATAGACCGCAACCTGCAC----- mirR 24 3
-----ACTTAATAGACCGCAACCT----- mirR 19 1
-----TTAATAGACCGCAACCTGC----- mirR 19 1
-----TTAATAGACCGCAACCTGCACCTGG----- mirR 24 1
-----CTGGCCATGCTCTGGGCTG morR 19 1

```

>mmu-mir-654

```

CCTCCTCGGTAAGTGGGAAGATGGTAAGCTGCAGAACATGTGTGTTTCTCATGTATATGTCTGCTGACCATCACCTTTGGGTCTCTGCCTGTGGAG species len reads
---CCTCGGTAAGTGGGAAGA--- morL 18 4
CCTCCTCGGTAAGTGGGA--- morL 18 3
-CTCCTCGGTAAGTGGGAAG- morL 19 1
---CCTCGGTAAGTGGGAAGAT--- morL 19 1
-----TGGTAAGCTGCAGAACATGTGT----- mirL 22 149
-----TGGTAAGCTGCAGAACATGT----- mirL 20 41
-----GGTAAGCTGCAGAACATGTGT----- mirL 21 30

```

```

-----TGGTAAGCTGCAGAACATGT----- mirL 21 9
-----GGTAAGCTGCAGAACATGT----- mirL 19 7
-----GTAAGCTGCAGAACATGTGT----- mirL 20 3
-----GGTAAGCTGCAGAACATG----- mirL 18 1
-----TGGTAAGCTGCAGAACATG----- mirL 19 1
-----TATGTCTGCTGACCATCACCTT----- mirR 22 509
-----TATGTCTGCTGACCATCACCT----- mirR 21 115
-----TATGTCTGCTGACCATCACCT----- mirR 20 43
-----TGTCTGCTGACCATCACCTT----- mirR 20 28
-----ATGTCTGCTGACCATCACCTT----- mirR 21 21
-----GTCTGCTGACCATCACCTT----- mirR 19 8
-----CATATGTCTGCTGACCAT----- mirR 18 5
-----TATGTCTGCTGACCATCA----- mirR 18 5
-----ATATGTCTGCTGACCATC----- mirR 18 3
-----ATATGTCTGCTGACCATCACCT----- mirR 22 3
-----GTCTGCTGACCATCACCT----- mirR 18 2
-----TATGTCTGCTGACCATCACCTTT----- mirR 23 1
-----GTCTGCTGACCATCACCTTTG----- mirR 21 1
-----TATGTCTGCTGACCATCAC----- mirR 19 1
-----TCATATGTCTGCTGACCA----- mirR 18 1
-----TGTCTGCTGACCATCAC----- mirR 18 1
-----TTGGGTCTCTGCCTGTGG----- morR 18 1
-----TTGGGTCTCTGCCTGTGG----- morR 18 1
-----TTGGGTCTCTGCCTGTGGA----- morR 19 1
-----CTTTGGGTCTCTGCCTGT----- morR 18 1
-----TGGGTCTCTGCCTGTGGAG----- morR 19 1

>mmu-mir-219-2
GAACTCAGGGGCTTCGCCACTGATTGTCCAAACGCAATTCTTGTACGAGTCTGCGGCCAACCGAGAATTGTGGCTGGACATCTGTGGTTGAGCTCCGGGCTCTACA species len reads
-AACTCAGGGGCTTCGCCA----- morL 18 1
---TCAGGGGCTTCGCCACTG----- morL 18 1
---CTCAGGGGCTTCGCCACT----- morL 18 1
GAACTCAGGGGCTTCGCC----- morL 18 1
-----TGATTGTCCAAACGCAATTCT----- mirL 21 172
-----TGATTGTCCAAACGCAATTCTTG----- mirL 23 96
-----TGATTGTCCAAACGCAATTC----- mirL 20 14
-----TGATTGTCCAAACGCAATTCTT----- mirL 22 13
-----TGATTGTCCAAACGCAATTCTTGT----- mirL 24 13
-----GATTGTCCAAACGCAATTCTTG----- mirL 22 10
-----GATTGTCCAAACGCAATTCT----- mirL 20 9
-----TGATTGTCCAAACGCAATT----- mirL 19 9
-----TGATTGTCCAAACGCAAT----- mirL 18 8
-----GATTGTCCAAACGCAATTCTTGT----- mirL 23 4
-----GATTGTCCAAACGCAATTC----- mirL 19 1
-----CTGATTGTCCAAACGCAATTCT----- mirL 22 1
-----GATTGTCCAAACGCAATTCTTGTA----- mirL 24 1

```

```

-----TTGTCCAACGCAATTCT----- mirL 18 1
-----TACGAGTCTGCGGCAAC----- loop 18 3
-----ACGAGTCTGCGGCAACC----- loop 18 1
-----AGAATTGTGGCTGGACATCTGT----- mirR 22 321
-----AGAATTGTGGCTGGACATCTG----- mirR 21 238
-----AGAATTGTGGCTGGACATCT----- mirR 20 51
-----AGAATTGTGGCTGGACATC----- mirR 19 14
-----ATTGTGGCTGGACATCTGT----- mirR 19 4
-----AGAATTGTGGCTGGACAT----- mirR 18 3
-----AGAATTGTGGCTGGACATCTGTG----- mirR 23 2
-----AGAATTGTGGCTGGACATCTGTGG----- mirR 24 2
-----AATTGTGGCTGGACATCTG----- mirR 19 2
-----ATTGTGGCTGGACATCTGTG----- mirR 20 1
-----CCGAGAATTGTGGCTGGA----- mirR 18 1
-----GAGAATTGTGGCTGGACATCTGT----- mirR 23 1
-----GAATTGTGGCTGGACATCTGT----- mirR 21 1
-----TGAGCTCCGGGCTCTACA morR 18 1

```

>mmu-mir-3471-1

| Sequence                                                                                       | Species | len | reads |
|------------------------------------------------------------------------------------------------|---------|-----|-------|
| GAGCCTCCATGAGATCCAACGTAAAGGCATTTCCTCAATTAGTGCTGTTATGCTGCTAGTGCTATGCTCTGTCCAGTTCTTTTTGGAGGTATTT | morL    | 22  | 5     |
| --GCCTCCATGAGATCCAACGTAA--                                                                     | morL    | 18  | 3     |
| ---CTCCATGAGATCCAACGTG---                                                                      | morL    | 25  | 2     |
| GAGCCTCCATGAGATCCAACGTAA                                                                       | morL    | 20  | 2     |
| ---CCTCCATGAGATCCAACGTG---                                                                     | morL    | 21  | 2     |
| --GCCTCCATGAGATCCAACGTG--                                                                      | morL    | 18  | 1     |
| ---CCTCCATGAGATCCAACGT---                                                                      | morL    | 25  | 1     |
| --GCCTCCATGAGATCCAACGTG--                                                                      | morL    | 20  | 1     |
| ---CCTCCATGAGATCCAACGTGTAAGG---                                                                | morL    | 24  | 1     |
| -----AGGCATTTCTCAATTAGT-----                                                                   | mirL    | 19  | 11    |
| -----TAAGGCATTTCTCAATTA-----                                                                   | mirL    | 19  | 8     |
| -----TAAGGCATTTCTCAATTAGT-----                                                                 | mirL    | 21  | 8     |
| -----GTAAGGCATTTCTCAATTAGT-----                                                                | mirL    | 22  | 7     |
| -----TAAGGCATTTCTCAATTAG-----                                                                  | mirL    | 20  | 7     |
| -----AGGCATTTCTCAATTAG-----                                                                    | mirL    | 18  | 1     |
| -----GTAAGGCATTTCTCAATTAG-----                                                                 | mirL    | 21  | 1     |
| -----TAGTGTATGCTCTGTCCA-----                                                                   | mirR    | 18  | 914   |
| -----TAGTGTATGCTCTGTCCAG-----                                                                  | mirR    | 19  | 2     |
| -----GCTAGTGTATGCTCTGTCCA-----                                                                 | mirR    | 20  | 1     |
| -----AGTGTATGCTCTGTCCAGTTTC-----                                                               | mirR    | 22  | 1     |
| -----TAGTGTATGCTCTGTCCAGT-----                                                                 | mirR    | 20  | 1     |
| -----AGTGTATGCTCTGTCCAGT-----                                                                  | mirR    | 19  | 1     |
| -----GCTAGTGTATGCTCTGTCC-----                                                                  | mirR    | 19  | 1     |
| -----GCTAGTGTATGCTCTGTCC-----                                                                  | mirR    | 18  | 1     |
| -----AGTGTATGCTCTGTCCAGTTT-----                                                                | mirR    | 21  | 1     |
| -----TTCTTTTTGGAGGTATTT morR 18 6                                                              | morR    | 18  | 6     |



```
-----TTTCTTTTTGGAGGTATT- morR 18 4
-----CCAGTTTCTTTTTGGAGG----- morR 18 2
-----CAGTTTCTTTTTGGAGGT---- morR 18 1

>mmu-mir-466i
CATTTTTGATATATATTATGTATGTATGTGTGTGTGTGTGTGTGTATATATATACACACACACATACACTACATGTATGCAACATATATACTACATAT species len reads
--TTTTTGATATATATTATG----- morL 18 1
CATTTTTGATATATATTA----- morL 18 1
-----TGTATGTATGTGTGTGTGTGTG----- mirL 22 37
-----TGTATGTATGTGTGTGTGTGTGTG----- mirL 24 17
-----TGTATGTATGTGTGTGTGTGTGT----- mirL 23 11
-----ATGTATGTATGTGTGTGTGTGT----- mirL 22 9
-----ATGTATGTATGTGTGTGTGTGT----- mirL 21 7
-----TGTATGTATGTGTGTGTGTGT----- mirL 21 6
-----TATGTATGTATGTGTGTGTGT----- mirL 21 5
-----TGTATGTATGTGTGTGTGT----- mirL 20 4
-----ATGTATGTGTGTGTGTGTGTGT----- mirL 22 3
-----TATGTATGTGTGTGTGTGTGT----- mirL 22 2
-----TTATGTATGTATGTGTGTGTGT----- mirL 22 2
-----ATGTATGTATGTGTGTGT----- mirL 18 2
-----ATGTATGTGTGTGTGTGTGT----- mirL 20 1
-----ATGTATGTATGTGTGTGTGTGTGTGTGTGTGTGTGTGTGTGTGTGTGTGTGTGTGTGTGTGTGT----- mirL 33 1
-----TGTATGTATGTGTGTGTGTGTGTGTGT----- mirL 27 1
-----TTATGTATGTATGTGTGTGT----- mirL 19 1
-----ATGTATGTGTGTGTGTGTGTGTGTGTGT----- mirL 25 1
-----ATGTATGTATGTGTGTGTGTGTGT----- mirL 23 1
-----ATGTATGTATGTGTGTGTGT----- mirL 19 1
-----GTATGTATGTGTGTGTGTGTGT----- mirL 22 1
-----TATGTATGTATGTGTGTGTGTGT----- mirL 22 1
-----ATGTATGTGTGTGTGTGTGTGT----- mirL 21 1
-----ATACACACACACATACACACTA----- mirR 22 416
-----ATACACACACACATACACACTAC----- mirR 23 318
-----TACACACACACATACACACTAC----- mirR 22 21
-----CACACACACATACACACTA----- mirR 19 18
-----ATATACACACACACATACA----- mirR 19 15
-----ATACACACACACATACACTACA----- mirR 24 12
-----TATACACACACATACACT----- mirR 22 9
-----ACACACACACATACACTA----- mirR 20 7
-----TACACACACACATACACTA----- mirR 21 6
-----ACACACACACATACACTAC----- mirR 21 6
-----CACACACACATACACTAC----- mirR 20 6
-----ATATACACACACACATACACAC----- mirR 22 5
-----TATACACACACATACACAC----- mirR 21 3
-----ATACACACACACATACACTACAT----- mirR 25 3
-----ATATACACACACACATACAC----- mirR 20 3
-----ATATACACACACACATAC----- mirR 18 2
```

```

-----TATACACACACACATACACA----- mirR 20 2
-----TATACACACACACATACACACTA----- mirR 23 1
-----TATACACACACACATACACA----- mirR 18 1
-----ATATACACACACACATACACACT----- mirR 23 1
-----TATACACACACACATACACACTAC----- mirR 24 1
-----ATATACACACACACATACACA----- mirR 21 1
-----TATACACACACACATACAC----- mirR 19 1
-----TACACACACACATACACACTACAT----- mirR 24 1
-----ACACACACACATACACACTACA----- mirR 22 1
-----CACACACACATACACACTACA----- mirR 21 1
-----TGTATGCAACATATATAC----- morR 18 1
-----GTATGCAACATATATACTACATAT morR 24 1

```

>mmu-mir-432

```

CCACTTCCCAGGAGTAGATCAGTGGGTAGCTCTTGCATTTCTGGTGGGGGCCACTGGATGGCTCCTCCACTTCTTGGAGTAGATCAGTGGGCAGCTCTTGCATTTCTGGTGGGGGCCACTGGATGGCTCCTCCACTTCT
-----TCCCAGGAGTAGATCAGTG-----
--ACTTCCCAGGAGTAGATCA-----
-CACTTCCCAGGAGTAGATC-----
---TTCCCAGGAGTAGATCAGT-----
CCACTTCCCAGGAGTAGAT-----
-----AGTGGGTAGCTCTTGCAT-----
-----TGGGTAGCTCTTGCATTT-----
-----AGTGGGTAGCTCTTGCATT-----
-----GTGGGTAGCTCTTGCATT-----
-----TGGGTAGCTCTTGCATTTCC-----
-----AGTGGGTAGCTCTTGCATTT-----
-----CTGGATGGCTCCTCCACTTCT-----
-----CTGGATGGCTCCTCCACTTC-----
-----CTGGATGGCTCCTCCACTT-----
-----CTGGATGGCTCCTCCACT-----
-----GATGGCTCCTCCACTTCT-----
-----GGATGGCTCCTCCACTTCT-----
-----GGATGGCTCCTCCACTTC-----
-----TGGATGGCTCCTCCACTTCT-----
-----TGGATGGCTCCTCCACTT-----
-----CCACTGGATGGCTCCTCCACTT-----

```

>mmu-mir-1960

```

GTCACAGAGTGAGCAGCCAGTGCTGTTAGAAAGAGGGCTGAGAGCAGGGAGAGCTCTTCTGCAGCACTGACTTTTCTCTGCATTGGCACATTTGAACACACCTAATAAAG species len reads
GTCACAGAGTGAGCAGCC----- morL 18 1
-TCACAGAGTGAGCAGCCA----- morL 18 1
-----CAGTGCTGTTAGAAAGAGGGC----- mirL 20 465
-----CCAGTGCTGTTAGAAAGAGGGCT----- mirL 22 405
-----AGTGCTGTTAGAAAGAGGGC----- mirL 19 25
-----CCAGTGCTGTTAGAAAGAGGGC----- mirL 21 25
-----CAGTGCTGTTAGAAAGAGGGCT----- mirL 21 9

```

```

-----CCAGTGCTGTTAGAAGAG----- mirL 18 6
-----GTGCTGTTAGAAGAGGGC----- mirL 18 5
-----GTGCTGTTAGAAGAGGGCT----- mirL 19 4
-----CCAGTGCTGTTAGAAGAGGGCTGA----- mirL 24 4
-----AGTGCTGTTAGAAGAGGGCT----- mirL 20 4
-----GCCAGTGCTGTTAGAAGAGGGC----- mirL 22 2
-----CAGTGCTGTTAGAAGAGG----- mirL 18 2
-----AGCCAGTGCTGTTAGAAG----- mirL 18 1
-----GCCAGTGCTGTTAGAAGA----- mirL 18 1
-----TGCTGTTAGAAGAGGGCT----- mirL 18 1
-----TCCTCTGCATTGGCACAT----- mirR 18 6
-----ATTTGAACACACCTAAT----- morR 18 3
-----TGAACACACCTAATAAAG morR 18 1

```

>mmu-mir-1-1

```

AACCTACCTGCTTGGGACACATACTTCTTTATATGCCCATATGAACCTGCTAAGCTATGGAATGTAAAGAAGTATGTATTTTCAGGCTAGGAACTCTCTCGCC species len reads
AACCTACCTGCTTGGGAC----- morL 18 1
-----ACATACTTCTTTATATGCCCAT----- mirL 22 14
-----ACATACTTCTTTATATGCCCATA----- mirL 23 8
-----ACATACTTCTTTATATATGCC----- mirL 19 3
-----ACATACTTCTTTATATGCCCA----- mirL 21 1
-----ACACATACTTCTTTATATGCC----- mirL 22 1
-----TGGAATGTAAAGAAGTATGTAT----- mirR 22 493
-----TGGAATGTAAAGAAGTATG----- mirR 19 139
-----TGGAATGTAAAGAAGTATGT----- mirR 20 132
-----TGGAATGTAAAGAAGTAT----- mirR 18 51
-----TGGAATGTAAAGAAGTATGTA----- mirR 21 46
-----GGAATGTAAAGAAGTATGTAT----- mirR 21 24
-----TGGAATGTAAAGAAGTATGTATT----- mirR 23 18
-----AATGTAAAGAAGTATGTAT----- mirR 19 10
-----GAATGTAAAGAAGTATGTATTT----- mirR 22 8
-----GGAATGTAAAGAAGTATGTA----- mirR 20 6
-----GGAATGTAAAGAAGTATGT----- mirR 19 2
-----TGGAATGTAAAGAAGTATGTATTT----- mirR 24 2
-----GGAATGTAAAGAAGTATGTATT----- mirR 22 1
-----GGAATGTAAAGAAGTATG----- mirR 18 1
-----AGGCTAGGAACTCTCTCGC----- morR 19 3
-----AGGCTAGGAACTCTCTCG----- morR 18 2
-----TATTTTCAGGCTAGGAACT----- morR 18 1
-----AGGCTAGGAACTCTCTCGCC morR 20 1
-----TTCAGGCTAGGAACTCTCTCG-- morR 21 1
-----TCAGGCTAGGAACTCTCT-- morR 18 1

```

>mmu-mir-763

```

CGTTTCCTGGGGATTAATGACCAGCTGGGAAGAACCAGTGGCCCTCGGCTCTGCCTCCCAGCCAGCCATTAACCTCCAAGGAAATGTCTTTTGCTGAGGTCGT species len reads
-----TCCTGGGGATTAATGACC----- morL 18 2

```

```

-----TCCTGGGGATTAATGACCA----- morL 19 1
---TTCTGGGGATTAATGAC----- morL 18 1
CGTTTCTCTGGGGATTAAT----- morL 18 1
-----CCAGCTGGGAAGAACCAGTGGC----- mirL 22 760
-----CCAGCTGGGAAGAACCAGTGG----- mirL 21 91
-----CCAGCTGGGAAGAACCAGTG----- mirL 20 32
-----CCAGCTGGGAAGAACCAGTGGCC----- mirL 23 19
-----CCAGCTGGGAAGAACCAGT----- mirL 19 18
-----CCAGCTGGGAAGAACCAG----- mirL 18 10
-----CAGCTGGGAAGAACCAGTGGC----- mirL 21 4
-----AGCTGGGAAGAACCAGTGGC----- mirL 20 3
-----GCTGGGAAGAACCAGTGGC----- mirL 19 3
-----AGCTGGGAAGAACCAGTGG----- mirL 19 3
-----TGACCAGCTGGGAAGAAC----- mirL 18 2
-----ACCAGCTGGGAAGAACCA----- mirL 18 2
-----ATGTCTTTGCTGAGGTC-- mirR 18 7
-----GTCTTTTGCTGAGGTCGT mirR 18 3

```

>mmu-mir-1197

```

ACCTCAAGGTATTTGAAGATGCGGTTGACCATGGTGTGTACGCTTTATTATGACGTAGGACACATGGTCTACTTCTCTCAATATCACATC species len reads
ACCTCAAGGTATTTGAAGATG----- morL 21 8
-CCTCAAGGTATTTGAAGATG----- morL 20 3
-----CGGTTGACCATGGTGTGTACGC----- mirL 22 22
-----CGGTTGACCATGGTGTGTACG----- mirL 21 19
-----CGGTTGACCATGGTGTGTATA----- mirL 19 6
-----CGGTTGACCATGGTGTGTAC----- mirL 20 5
-----CGGTTGACCATGGTGTGT----- mirL 18 2
-----TGCGGTTGACCATGGTGTG----- mirL 19 1
-----TGCGGTTGACCATGGTGT----- mirL 18 1
-----ATGCGGTTGACCATGGTGT----- mirL 19 1
-----GCGGTTGACCATGGTGTGTACG----- mirL 22 1
-----CGGTTGACCATGGTGTGTACGCTT----- mirL 24 1
-----ATGCGGTTGACCATGGTG----- mirL 18 1
-----GGTTGACCATGGTGTGTAC----- mirL 19 1
-----CGGTTGACCATGGTGTGTACGCT----- mirL 23 1
-----TAGGACACATGGTCTACTTCT----- mirR 21 657
-----AGGACACATGGTCTACTTCT----- mirR 20 68
-----TAGGACACATGGTCTACTTC----- mirR 20 43
-----TAGGACACATGGTCTACTT----- mirR 19 23
-----TAGGACACATGGTCTACTTCTT----- mirR 22 13
-----TAGGACACATGGTCTACT----- mirR 18 12
-----GGACACATGGTCTACTTCT----- mirR 19 5
-----TAGGACACATGGTCTACTTCTC----- mirR 23 4
-----AGGACACATGGTCTACTT----- mirR 18 4
-----GACACATGGTCTACTTCT----- mirR 18 3
-----GGACACATGGTCTACTTC----- mirR 18 3

```

```
-----AGGACACATGGTCTACTTC----- mirR 19 2
-----GACACATGGTCTACTTCTTC----- mirR 20 2
-----AGGACACATGGTCTACTTCTT----- mirR 21 1
-----GTAGGACACATGGTCTACTTCT----- mirR 22 1
-----CGTAGGACACATGGTCTAC----- mirR 19 1
-----AGGACACATGGTCTACTTCTTC----- mirR 22 1
-----TCTTCTCAATATCACATC morR 18 2
```

>mmu-mir-4661

```
GTGATGACCCCTATGTATGTGCATGTGTGTTGTGTGTACATGTACATGTATATATATATTTGATATACATATAAATACATGCACACATATTCATGCATGCACACGCACACATT species len reads
GTGATGACCCCTATGTAT----- morL 18 1
-TGATGACCCCTATGTAT----- morL 18 1
-----CATGTGTGTTTGTGTGTACAT----- mirL 21 8
-----ATGTGTGTTTGTGTGTAC----- mirL 18 5
-----TGTGTGTTTGTGTGTACATGT----- mirL 21 1
-----ATGTGTGTTTGTGTGTACA----- mirL 19 1
-----TATAAATACATGCACACATATT----- mirR 22 522
-----TATAAATACATGCACACATATTC----- mirR 23 106
-----TATAAATACATGCACACATAT----- mirR 21 47
-----TAAATACATGCACACATATTC----- mirR 21 31
-----ATAAATACATGCACACATATT----- mirR 21 31
-----TATAAATACATGCACACA----- mirR 18 28
-----ATAAATACATGCACACATATTC----- mirR 22 28
-----TAAATACATGCACACATATT----- mirR 20 13
-----TATAAATACATGCACACAT----- mirR 19 11
-----CATATAAATACATGCACACATA----- mirR 22 7
-----TAAATACATGCACACATATTCA----- mirR 19 6
-----AAATACATGCACACATATT----- mirR 20 6
-----TATAAATACATGCACACATA----- mirR 25 6
-----CATATAAATACATGCACACATATTC----- mirR 20 6
-----AAATACATGCACACATATTC----- mirR 18 5
-----ATAAATACATGCACACATA----- mirR 19 5
-----CATATAAATACATGCACACATATT----- mirR 24 5
-----ATAAATACATGCACACATAT----- mirR 20 4
-----ATATAAATACATGCACACAT----- mirR 20 3
-----ATAAATACATGCACACATATTC----- mirR 23 3
-----CATATAAATACATGCACACAT----- mirR 21 3
-----TATAAATACATGCACACATATTC----- mirR 24 2
-----ACATATAAATACATGCACACAT----- mirR 22 1
-----TAAATACATGCACACATA----- mirR 18 1
-----ATATAAATACATGCACAC----- mirR 18 1
-----CATGCATGCACACGCACACAT----- morR 21 3
-----ATGCATGCACACGCACAC----- morR 18 3
-----TGCATGCACACGCACACAT----- morR 19 2
-----CATGCATGCACACGCACAC----- morR 19 1
```

```

-----CATGCATGCACACGCACA---- morR 18 1
-----TCATGCATGCACACGCAC---- morR 18 1
-----TCATGCATGCACACGCACAC--- morR 20 1
-----CATGCATGCACACGCACACATT morR 22 1

```

>mmu-mir-3470b

| CTCTGTGTAGCCTTGGCTGTCCTGGCACTCACTCTGTAGACCAGGCTGGCCTTGAACCTCAAAAATTCACCTGCCTCTGCCTCCCAGTGCTGGGACTAAAGGCATGC | species | len | reads |
|-------------------------------------------------------------------------------------------------------------|---------|-----|-------|
| -----TAGCCTTGGCTGTCCTGGCACT-----                                                                            | morL    | 22  | 4     |
| ---GTGTAGCCTTGGCTGTCCTGGC---                                                                                | morL    | 22  | 4     |
| --CTGTGTAGCCTTGGCTGTCCTGGC--                                                                                | morL    | 24  | 3     |
| -----TGGCTGTCCTGGCACTCA-----                                                                                | morL    | 18  | 2     |
| -----GCCTTGGCTGTCCTGGCACTCA-----                                                                            | morL    | 22  | 2     |
| ---GTGTAGCCTTGGCTGTCCTGGCACT---                                                                             | morL    | 25  | 2     |
| -----CCTTGGCTGTCCTGGCACTCAC-----                                                                            | morL    | 22  | 2     |
| ---TGTGTAGCCTTGGCTGTCCTGGC---                                                                               | morL    | 23  | 2     |
| -----TGTAGCCTTGGCTGTCCTGGCACTCA-----                                                                        | morL    | 26  | 2     |
| CTCTGTGTAGCCTTGGCTGTCCTGGCACTCAC                                                                            | morL    | 32  | 1     |
| ---TGTGTAGCCTTGGCTGTCCTGGCA---                                                                              | morL    | 24  | 1     |
| -----GTAGCCTTGGCTGTCCTGGCACTC-----                                                                          | morL    | 24  | 1     |
| -----CCTTGGCTGTCCTGGCACTCA-----                                                                             | morL    | 21  | 1     |
| ---GTGTAGCCTTGGCTGTCCTGGCACTCAC---                                                                          | morL    | 28  | 1     |
| --CTGTGTAGCCTTGGCTGTCCTGGCACT--                                                                             | morL    | 27  | 1     |
| ----TGTAGCCTTGGCTGTCCTGGCAC----                                                                             | morL    | 23  | 1     |
| -TCTGTGTAGCCTTGGCTGTCCTGGCA-                                                                                | morL    | 26  | 1     |
| -----AGCCTTGGCTGTCCTGGCA-----                                                                               | morL    | 19  | 1     |
| -----GCCTTGGCTGTCCTGGCAC-----                                                                               | morL    | 19  | 1     |
| -----TTGGCTGTCCTGGCACTCA-----                                                                               | morL    | 19  | 1     |
| --CTGTGTAGCCTTGGCTGTCCTGGCACTCAC--                                                                          | morL    | 30  | 1     |
| -----TAGCCTTGGCTGTCCTGGCACTCA-----                                                                          | morL    | 24  | 1     |
| ---TGTAGCCTTGGCTGTCCTGGC---                                                                                 | morL    | 21  | 1     |
| ---TGTGTAGCCTTGGCTGTCCTGGCACTCA---                                                                          | morL    | 28  | 1     |
| -----GCCTTGGCTGTCCTGGCACTC-----                                                                             | morL    | 21  | 1     |
| --CTGTGTAGCCTTGGCTGTCCTGGCACTC--                                                                            | morL    | 28  | 1     |
| -----CACTCTGTAGACCAGGCT-----                                                                                | mirL    | 18  | 19    |
| -----TCACTCTGTAGACCAGGC-----                                                                                | mirL    | 18  | 15    |
| -----ACTCACTCTGTAGACCAGGCTGGCCTTGAACCTC-----                                                                | mirL    | 33  | 15    |
| -----TCTGTAGACCAGGCTGGCCT-----                                                                              | mirL    | 20  | 10    |
| -----TCTGTAGACCAGGCTGGCCTTG-----                                                                            | mirL    | 22  | 10    |
| -----CACTCTGTAGACCAGGCTGGCCTTGAACCTCAA-----                                                                 | mirL    | 32  | 8     |
| -----CTCACTCTGTAGACCAGGCTGGCCTTGAAC-----                                                                    | mirL    | 30  | 8     |
| -----ACTCTGTAGACCAGGCTGG-----                                                                               | mirL    | 19  | 7     |
| -----TCACTCTGTAGACCAGGCTGGC-----                                                                            | mirL    | 22  | 7     |
| -----ACTCTGTAGACCAGGCTG-----                                                                                | mirL    | 18  | 6     |
| -----ACTCACTCTGTAGACCAGGCT-----                                                                             | mirL    | 21  | 6     |
| -----CTCTGTAGACCAGGCTGGCCT-----                                                                             | mirL    | 21  | 6     |
| -----ACTCTGTAGACCAGGCTGGCCTT-----                                                                           | mirL    | 23  | 5     |

```

-----TCACTCTGTAGACCAGGCTGGCC----- mirL 23 5
-----CTCTGTAGACCAGGCTGG----- mirL 18 5
-----ACTCACTCTGTAGACCAGGCTGG----- mirL 23 5
-----ACTCACTCTGTAGACCAGGCTGGCCT----- mirL 26 4
-----TCTGTAGACCAGGCTGGCCTTGAACTC----- mirL 27 4
-----CTCACTCTGTAGACCAGGCTGGC----- mirL 23 4
-----CTCACTCTGTAGACCAGGCTGGCCTTGAACTC----- mirL 32 4
-----CACTCTGTAGACCAGGCTGGC----- mirL 21 4
-----ACTCTGTAGACCAGGCTGGCC----- mirL 21 4
-----CTCTGTAGACCAGGCTGGCCTTGAACT----- mirL 27 3
-----CTCACTCTGTAGACCAGGCT----- mirL 20 3
-----ACTCTGTAGACCAGGCTGGCCT----- mirL 22 3
-----CTCACTCTGTAGACCAGGC----- mirL 19 3
-----TCTGTAGACCAGGCTGGCCTTGA----- mirL 23 3
-----TCACTCTGTAGACCAGGCTGGCCT----- mirL 24 3
-----CACTCTGTAGACCAGGCTGGCCTTGA----- mirL 27 3
-----CACTCTGTAGACCAGGCTGGCCTTGAACTC----- mirL 30 3
-----ACTCACTCTGTAGACCAGGCTG----- mirL 22 3
-----ACTCACTCTGTAGACCAGGCTGGC----- mirL 24 2
-----CACTCTGTAGACCAGGCTGG----- mirL 20 2
-----CTCTGTAGACCAGGCTGGC----- mirL 19 2
-----CACTCTGTAGACCAGGCTGGCCT----- mirL 23 2
-----CTCACTCTGTAGACCAGGCTGGCCTTGA----- mirL 28 2
-----CTCTGTAGACCAGGCTGGCCTT----- mirL 22 2
-----ACTCACTCTGTAGACCAGGCTGGCCTTG----- mirL 28 2
-----CTCTGTAGACCAGGCTGGCCTTGA----- mirL 25 2
-----ACTCTGTAGACCAGGCTGGC----- mirL 20 2
-----ACTCTGTAGACCAGGCTGGCCTTGAACTCA----- mirL 30 2
-----CTCTGTAGACCAGGCTGGCCTTGAAC----- mirL 26 2
-----CTCACTCTGTAGACCAGGCTGGCCTTG----- mirL 27 2
-----TCTGTAGACCAGGCTGGC----- mirL 18 2
-----TCTGTAGACCAGGCTGGCC----- mirL 19 1
-----TCTGTAGACCAGGCTGGCCTT----- mirL 21 1
-----TCACTCTGTAGACCAGGCTGGCCTT----- mirL 25 1
-----TCACTCTGTAGACCAGGCTGGCCTTGA----- mirL 28 1
-----TCACTCTGTAGACCAGGCT----- mirL 19 1
-----GCTGGCCTTGAACTCAAA----- loop 18 2
-----CTGGCCTTGAACTCAAAA----- loop 18 1
-----AATTCACCTGCCTCTGCCTCCCG----- mirR 23 181
-----AAATTCACCTGCCTCTGCCTCCCG----- mirR 24 167
-----AAATTCACCTGCCTCTGCCTCC----- mirR 22 89
-----AATTCACCTGCCTCTGCCTCC----- mirR 21 46
-----AATTCACCTGCCTCTGCCTCCC----- mirR 22 26
-----AAATTCACCTGCCTCTGCCTCCC----- mirR 23 24
-----AAATTCACCTGCCTCTGCCTC----- mirR 21 23
-----AATTCACCTGCCTCTGCCTCCCGA----- mirR 24 18

```

```
-----AAATTCACCTGCCTCTGCCTCCCGA----- mirR 25 9
-----AATTCACCTGCCTCTGCCTC----- mirR 20 9
-----ATTCACCTGCCTCTGCCTCCCG----- mirR 22 7
-----TTCACCTGCCTCTGCCTCCCGA----- mirR 22 4
-----TCACCTGCCTCTGCCTCC----- mirR 18 3
-----AATTCACCTGCCTCTGCCTCCCGAGT----- mirR 26 2
-----AATTCACCTGCCTCTGCCTCCCGAG----- mirR 25 2
-----ATTCACCTGCCTCTGCCT----- mirR 18 2
-----TCACCTGCCTCTGCCTCCCG----- mirR 20 2
-----TTCACCTGCCTCTGCCTCCCG----- mirR 21 2
-----ATTCACCTGCCTCTGCCTCCC----- mirR 21 2
-----ATTCACCTGCCTCTGCCTC----- mirR 19 1
-----AAATTCACCTGCCTCTGCCT----- mirR 20 1
-----TCACCTGCCTCTGCCTCCCGAG----- mirR 22 1
-----ATTCACCTGCCTCTGCCTCCCGAGTGCTG----- mirR 29 1
-----ATTCACCTGCCTCTGCCTCCCGA----- mirR 23 1
-----TTCACCTGCCTCTGCCTCCC----- mirR 20 1
-----ATTCACCTGCCTCTGCCTCCCGAG----- mirR 24 1
-----TTCACCTGCCTCTGCCTCCCGAGTGCTGGG----- mirR 30 1
-----AAATTCACCTGCCTCTGCCTCCCGAG----- mirR 26 1
-----GAGTGCTGGGACTAAAGGCA--- morR 20 2
-----CGAGTGCTGGGACTAAAGGCAT-- morR 22 2
-----GAGTGCTGGGACTAAAGGCAT-- morR 21 1
-----CGAGTGCTGGGACTAAAGGCATG- morR 23 1
-----CCGAGTGCTGGGACTAAAG----- morR 19 1
-----GTGCTGGGACTAAAGGCATGC morR 21 1
-----GAGTGCTGGGACTAAAGGCATG- morR 22 1
-----CCGAGTGCTGGGACTAAA----- morR 18 1

>mmu-mir-1938
CGAACGGGAGACCCCGCCTGGGGCGGGTGGGACTTGTAGTTCGGTCTTCGCTTCGGACGCCAAGTCTGCATAGCGGTGGTACGGCTGAACTGCAGTTCATCATGCCCTGGGACTCGCGCTTCTTGAGCTG spec
-----GGGAGACCCCGCCTGGG----- morL
-----AGACCCCGCCTGGGGCG----- morL
-----GGGAGACCCCGCCTGGGG----- morL
CGAACGGGAGACCCCGCCTGGG----- morL
-----GGGAGACCCCGCCTGGGG----- morL
-----CGGTGGGACTTGTAGTTCGG----- mirL
-----CGGTGGGACTTGTAGTTCGGT----- mirL
-----CGGTGGGACTTGTAGTTCGGTC----- mirL
-----CGGTGGGACTTGTAGTTCG----- mirL
-----GGTGGGACTTGTAGTTCGGTC----- mirL
-----TGGGACTTGTAGTTCGGTC----- mirL
-----GGTGGGACTTGTAGTTCG----- mirL
-----GTGGGACTTGTAGTTCGG----- mirL
-----CGGTGGGACTTGTAGTTCGGTCT----- mirL
-----GCGGTGGGACTTGTAGTTCGGT----- mirL
```



```
-----CGGTGGGACTTGTAGTTC----- mirL
-----TGGGACTTGTAGTTCGGT----- mirL
-----GCGGTGGGACTTGTAGTTCGG----- mirL
-----GTGGGACTTGTAGTTCGGTC----- mirL
-----GCGGTGGGACTTGTAGTTCG----- mirL
-----GCGCGGTGGGACTTGTAG----- mirL
-----GCGGTGGGACTTGTAGTT----- mirL
-----GTGGGACTTGTAGTTCGGT----- mirL
-----TGGGACTTGTAGTTCGGTCTTCGCTTC----- mirL
-----TCCCCATCATGCCCTGGG----- mirR
-----CCCATCATGCCCTGGGAC----- mirR
-----CAGTCCCCATCATGCCCT----- mirR
-----GGACTCGCGCTTCTTGAG--- morR
-----CTCGCGCTTCTTGAGCTG morR
```

>mmu-mir-1905

```
GTTGGTCTGCTGCTGGATGCGTTTGTATGGTTCGCTCCCTTGGGGCCACCACCAGTCCCACCACGCGGTAGGGTACTCGTACACGGATGGTCAC species len reads
GTTGGTCTGCTGCTGGATG----- morL 19 1
-----CGTTTGTATGGTTCGCTCCC----- mirL 18 3
-----CACCAGTCCCACCACGCGGTAG----- mirR 22 657
-----CACCAGTCCCACCACGCGGTA----- mirR 21 73
-----ACCAAGTCCCACCACGCGGTAG----- mirR 21 35
-----CACCAGTCCCACCACGCGGT----- mirR 20 27
-----CCAGTCCCACCACGCGGTAG----- mirR 20 18
-----CACCAGTCCCACCACGCGG----- mirR 19 15
-----CAGTCCCACCACGCGGTAG----- mirR 19 10
-----ACCAGTCCCACCACGCGGTA----- mirR 20 5
-----CCACCAGTCCCACCACGCGGTAG----- mirR 23 4
-----ACCAGTCCCACCACGCGGT----- mirR 19 3
-----CAGTCCCACCACGCGGTA----- mirR 18 2
-----ACCACCAGTCCCACCACGC----- mirR 19 2
-----CCAGTCCCACCACGCGGTA----- mirR 19 2
-----CCACCAGTCCCACCACGC----- mirR 18 2
-----CACCAGTCCCACCACGCG----- mirR 18 1
-----CACCACCAGTCCCACCAC----- mirR 18 1
-----ACCACCAGTCCCACCACG----- mirR 18 1
-----ACCAGTCCCACCACGCGG----- mirR 18 1
-----TAGGGTACTCGTACACGG----- morR 18 2
-----GTACTCGTACACGGATGG----- morR 18 1
-----GGTACTCGTACACGGATG----- morR 18 1
-----AGGGTACTCGTACACGGA----- morR 18 1
-----ACTCGTACACGGATGGTCAC morR 20 1
-----TACTCGTACACGGATGGT--- morR 18 1
-----ACTCGTACACGGATGGTC-- morR 18 1
```

>mmu-mir-1953

| Sequence                                                                                                     | Species | len | reads |
|--------------------------------------------------------------------------------------------------------------|---------|-----|-------|
| CCCCAGGTGCTGCCTGGTCTTGGGAAAGTTCTCAGGCTTCTGAGAATTTGCAGGAGCAGAAGGCTGTGAGGTTCCCTCTTCCTGGCAGCCCTAAGATCTGGGGAGCCA | species |     |       |
| ---CAGGTGCTGCCTGGTCTTGG-----                                                                                 | morL    | 20  | 5     |
| CCCCAGGTGCTGCCTGGT-----                                                                                      | morL    | 18  | 3     |
| ---CAGGTGCTGCCTGGTCTTGG-----                                                                                 | morL    | 19  | 2     |
| ---AGGTGCTGCCTGGTCTTGG-----                                                                                  | morL    | 18  | 1     |
| ---CAGGTGCTGCCTGGTCTT-----                                                                                   | morL    | 18  | 1     |
| -----TGGGAAAGTTCTCAGGCTTCTG-----                                                                             | mirL    | 22  | 562   |
| -----TGGGAAAGTTCTCAGGCTTCT-----                                                                              | mirL    | 21  | 83    |
| -----TGGGAAAGTTCTCAGGCTTCT-----                                                                              | mirL    | 20  | 28    |
| -----GGGAAAGTTCTCAGGCTTCTG-----                                                                              | mirL    | 21  | 24    |
| -----TGGGAAAGTTCTCAGGCTTCTGA-----                                                                            | mirL    | 23  | 19    |
| -----TGGGAAAGTTCTCAGGCT-----                                                                                 | mirL    | 18  | 12    |
| -----TGGGAAAGTTCTCAGGCTT-----                                                                                | mirL    | 19  | 3     |
| -----TTGGGAAAGTTCTCAGGCTTCTG-----                                                                            | mirL    | 23  | 3     |
| -----GAAAGTTCTCAGGCTTCTGA-----                                                                               | mirL    | 20  | 1     |
| -----TGGGAAAGTTCTCAGGCTTCTGAGAATTTGC-----                                                                    | mirL    | 31  | 1     |
| -----GTTCCCTCTTCCTGGCA-----                                                                                  | mirR    | 18  | 54    |
| -----GTTCCCTCTTCCTGGCAG-----                                                                                 | mirR    | 19  | 8     |
| -----TCCCTCTTCCTGGCAG-----                                                                                   | mirR    | 18  | 7     |
| -----TCCCTCTTCCTGGCAGC-----                                                                                  | mirR    | 19  | 6     |
| -----GTTCCCTCTTCCTGGCAGC-----                                                                                | mirR    | 20  | 6     |
| -----AGGTCCCTCTTCCTGG-----                                                                                   | mirR    | 18  | 4     |
| -----TCCCTCTTCCTGGCAGC-----                                                                                  | mirR    | 18  | 2     |
| -----GAGGTCCCTCTTCCTGG-----                                                                                  | mirR    | 19  | 2     |
| -----GAGGTCCCTCTTCCTG-----                                                                                   | mirR    | 18  | 2     |
| -----GTTCCCTCTTCCTGGCAGCC-----                                                                               | mirR    | 21  | 1     |
| -----GGTCCCTCTTCCTGGCAGC-----                                                                                | mirR    | 21  | 1     |
| -----GGTCCCTCTTCCTGGC-----                                                                                   | mirR    | 18  | 1     |
| -----GGTCCCTCTTCCTGGCAGCC-----                                                                               | mirR    | 22  | 1     |
| -----TCCCTCTTCCTGGCAGCCC-----                                                                                | mirR    | 20  | 1     |
| -----AGGTCCCTCTTCCTGGC-----                                                                                  | mirR    | 19  | 1     |
| -----GAGGTCCCTCTTCCTGGC-----                                                                                 | mirR    | 20  | 1     |
| -----GTTCCCTCTTCCTGGCAGCCCT-----                                                                             | mirR    | 23  | 1     |
| -----CTAAGATCTGGGGAGCCA-----                                                                                 | morR    | 18  | 2     |
| -----CAGCCCTAAGATCTGGGG-----                                                                                 | morR    | 18  | 1     |
| -----AGCCCTAAGATCTGGGGAG-----                                                                                | morR    | 19  | 1     |
| -----AGCCCTAAGATCTGGGGAGCCA-----                                                                             | morR    | 22  | 1     |
| -----CCCTAAGATCTGGGGAGCC-----                                                                                | morR    | 19  | 1     |

>mmu-mir-1940

| Sequence                                                                                               | Species | len | reads |
|--------------------------------------------------------------------------------------------------------|---------|-----|-------|
| GAGCCAGGATGCAGCCTGCTATGGAGGACTGAGAAGGTGGAGCAGTTCTGTACCGTGTGCCTTCCATTGGTTAAGACCTCCAACAGTAAAGGGCTGGCCGGC | species |     |       |
| -AGCCAGGATGCAGCCTGCT-----                                                                              | morL    | 19  | 4     |
| GAGCCAGGATGCAGCCTG-----                                                                                | morL    | 18  | 1     |
| --GCCAGGATGCAGCCTGCT-----                                                                              | morL    | 18  | 1     |
| -----ATGGAGGACTGAGAAGGTGGAGCAGTT-----                                                                  | mirL    | 27  | 376   |
| -----ATGGAGGACTGAGAAGGTGGAGCAG-----                                                                    | mirL    | 25  | 165   |

```

-----ATGGAGGACTGAGAAGGTGGAGCA----- mirL 24 49
-----ATGGAGGACTGAGAAGGTGGAGCAGT----- mirL 26 46
-----ATGGAGGACTGAGAAGGTGGAGC----- mirL 23 26
-----GGAGGACTGAGAAGGTGGAGCAGTT----- mirL 25 26
-----GAGGACTGAGAAGGTGGAGCAGTT----- mirL 24 25
-----ATGGAGGACTGAGAAGGTG----- mirL 19 21
-----ATGGAGGACTGAGAAGGTGGAG----- mirL 22 16
-----TATGGAGGACTGAGAAGGTGGAGCAGT----- mirL 27 13
-----GAGGACTGAGAAGGTGGAGCAGT----- mirL 23 10
-----TGGAGGACTGAGAAGGTGGAGCAGTT----- mirL 26 9
-----TGGAGGACTGAGAAGGTGG----- mirL 19 7
-----GAGGACTGAGAAGGTGGA----- mirL 18 3
-----GAGGACTGAGAAGGTGGAG----- mirL 19 2
-----TGGAGGACTGAGAAGGTGGAGCAGTTC----- mirL 27 2
-----GGAGGACTGAGAAGGTGGAGCAG----- mirL 23 2
-----TATGGAGGACTGAGAAGG----- mirL 18 1
-----TGGAGGACTGAGAAGGTG----- mirL 18 1
-----TGGAGGACTGAGAAGGTGGAGCA----- mirL 23 1
-----GAGGACTGAGAAGGTGGAGCAG----- mirL 22 1
-----TGGAGGACTGAGAAGGTGGAG----- mirL 21 1
-----GCTATGGAGGACTGAGAA----- mirL 18 1
-----TCTGTACCGTGCTGCCTTCCAT----- loop 22 3
-----TCTGTACCGTGCTGCCTTCC----- loop 20 1
-----TGTACCGTGCTGCCTTCC----- loop 18 1
-----CTGTACCGTGCTGCCTTC----- loop 18 1
-----TGGTAAAGACCTCCAACA----- mirR 18 15
-----GTAAAGACCTCCAACAGT----- mirR 18 1
-----GGTAAAGACCTCCAACAG----- mirR 18 1
-----AGTAAAGGGCTGGCCGGC morR 18 4

>mmu-mir-1935
GCCGGGCATGGTGGCGCACACCTTTTATCCCAGCACTCTGGAGGCAGAGGCTGGCGGATCTCTGAGTTCGAGGCCAGCCTGGTCTACAGAGTGAGTTCCAAGACAGCCAGGGCTACACAGA species len reads
-----GGCGCACACCTTTTATCCCAGCACT----- morL 25 22
-----GTGGCGCACACCTTTTATCCCAGCA----- morL 25 14
-----ACCTTTTATCCCAGCACTC----- morL 19 11
-----ACCTTTTATCCCAGCACT----- morL 18 9
-----CGCACACCTTTTATCCCAGCA----- morL 21 9
-----ACACCTTTTATCCCAGCA----- morL 18 6
-----GGCGCACACCTTTTATCCCAG----- morL 21 5
-----CACACCTTTTATCCCAGCA----- morL 19 4
-----GCACACCTTTTATCCCAG----- morL 18 3
-----GGTGGCGCACACCTTTTATCCCAG----- morL 24 2
-----ACACCTTTTATCCCAGCAC----- morL 19 2
-----CGCACACCTTTTATCCCAGCAC----- morL 22 2
GCCGGGCATGGTGGCGCACACCTTTTATCCCAGC----- morL 34 2
-----GCACACCTTTTATCCCAGCA----- morL 20 2

```

```

-----GCGCACACCTTTTATCCCAGC----- morL 21 2
-----GGTGGCGCACACCTTTTATCCCAGCA----- morL 26 2
-----GCACACCTTTTATCCCAGCACT----- morL 22 1
-----CACACCTTTTATCCCAGC----- morL 18 1
-----TGGCGCACACCTTTTATCCCAGC----- morL 23 1
-----CACCTTTTATCCCAGCACTCT----- morL 21 1
-----GCGCACACCTTTTATCCCAG----- morL 20 1
-----TGGCGCACACCTTTTATCCCAGCA----- morL 24 1
-----GTGGCGCACACCTTTTATCCCAG----- morL 23 1
-----TGGTGGCGCACACCTTTTATCCCAG----- morL 25 1
-----ATGGTGGCGCACACCTTTTATCCCAGCACT----- morL 30 1
-----CACACCTTTTATCCCAGCACT----- morL 21 1
-----ACCTTTTATCCCAGCACTCT----- morL 20 1
-----GGCGCACACCTTTTATCCCAGC----- morL 22 1
-----CGCACACCTTTTATCCCAG----- morL 19 1
-----ACACCTTTTATCCCAGCACT----- morL 20 1
-----CGCACACCTTTTATCCCAGCACTCT----- morL 25 1
-----CTGGAGGCAGAGGCTGGC----- mirL 18 1
-----CACTCTGGAGGCAGAGGC----- mirL 18 1
-----TCTGGAGGCAGAGGCTGGCG----- mirL 20 1
-----ACTCTGGAGGCAGAGGCT----- mirL 18 1
-----GCGGATCTCTGAGTTCGA----- loop 18 4
-----CGGATCTCTGAGTTCGAG----- loop 18 1
-----GAGGCCAGCCTGGTCTACA----- mirR 19 110
-----CGAGGCCAGCCTGGTCTACA----- mirR 20 78
-----GAGGCCAGCCTGGTCTACAG----- mirR 20 59
-----TCGAGGCCAGCCTGGTCTACA----- mirR 21 59
-----GAGGCCAGCCTGGTCTAC----- mirR 18 41
-----CGAGGCCAGCCTGGTCTACAGAGTGAGTTCC----- mirR 31 33
-----CGAGGCCAGCCTGGTCTACAG----- mirR 21 32
-----TCGAGGCCAGCCTGGTCTACAG----- mirR 22 31
-----CGAGGCCAGCCTGGTCTACAGA----- mirR 22 23
-----CGAGGCCAGCCTGGTCTACAGAGTGAGTTCC----- mirR 30 20
-----TTCGAGGCCAGCCTGGTCTACA----- mirR 22 20
-----GAGGCCAGCCTGGTCTACAGA----- mirR 21 17
-----CGAGGCCAGCCTGGTCTAC----- mirR 19 16
-----GAGGCCAGCCTGGTCTACAGAGTGAGTTCCA----- mirR 31 14
-----CGAGGCCAGCCTGGTCTA----- mirR 18 13
-----TTCGAGGCCAGCCTGGTC----- mirR 18 13
-----TTCGAGGCCAGCCTGGTCTACAGAGTGAGTTCC----- mirR 33 11
-----TCGAGGCCAGCCTGGTCTACAGA----- mirR 23 10
-----TTCGAGGCCAGCCTGGTCTAC----- mirR 21 9
-----GAGGCCAGCCTGGTCTACAGAGTGAGTTCC----- mirR 29 9
-----TCGAGGCCAGCCTGGTCTACAGAGTGAGTTCC----- mirR 31 9
-----TCGAGGCCAGCCTGGTCTACAGAG----- mirR 24 9
-----TTCGAGGCCAGCCTGGTCTACAGAGTGAG----- mirR 29 7

```

```
-----TCGAGGCCAGCCTGGTCTACAGAGTG----- mirR 26 7
-----TTCGAGGCCAGCCTGGTCTACAGA----- mirR 24 7
-----GAGGCCAGCCTGGTCTACAGAGTGA----- mirR 25 6
-----TTCGAGGCCAGCCTGGTCTACAGAGTG----- mirR 27 6
-----TCGAGGCCAGCCTGGTCTAC----- mirR 20 6
-----AGGCCAGCCTGGTCTACAGAGTGAGTTCCAAG----- mirR 32 4
-----ACAGAGTGAGTTCCAAGACAGCCAGGGCTACAC--- morR 33 8
-----GAGTGAGTTCCAAGACAGCCAGGGCTACA---- morR 29 3
-----AGAGTGAGTTCCAAGACAGCCAGGGCTACACAGA morR 34 3
-----ACAGAGTGAGTTCCAAGA----- morR 18 3
-----ACAGAGTGAGTTCCAAGACA----- morR 20 2
-----AGAGTGAGTTCCAAGACA----- morR 18 2
-----AGTGAGTTCCAAGACAGCCAGGGCTAC---- morR 27 2
-----GTGAGTTCCAAGACAGCCAGGGCTAC---- morR 26 1
-----ACAGAGTGAGTTCCAAGACAGCCAGGGCT----- morR 29 1
-----CAGAGTGAGTTCCAAGACA----- morR 19 1
-----AGTGAGTTCCAAGACAGCC----- morR 19 1
-----AGAGTGAGTTCCAAGACAGCC----- morR 21 1
-----ACAGAGTGAGTTCCAAGACAGCCAGGGCTAC---- morR 31 1
-----AGAGTGAGTTCCAAGACAGCCA----- morR 22 1
-----AGTGAGTTCCAAGACAGCCAGGGCTACACAGA morR 32 1
-----AGAGTGAGTTCCAAGACAGCCAGGGCTAC---- morR 29 1
-----AGAGTGAGTTCCAAGACAG----- morR 19 1
-----GAGTGAGTTCCAAGACAGCCAGGGCTACACA-- morR 31 1
```

>mmu-mir-449c

```
ATGAAGTGTGGGTGTGTCAGGCAGGCAGTGCATTGCTAGCTGGCTGTTAGAACTTTATCCCAACAGTTGCTAGCTGCACTACCCTCTGCTGCACTCAGAAGCATGCAAAGACGTGGAATAGTGCCATCTGGTGGATAAGG
--GAAGTGTGGGTGTGTCAG-----
----TGTGGGTGTGTCAGGCAG-----
---AAGTGTGGGTGTGTCAGG-----
---AAGTGTGGGTGTGTCAGGCAGG-----
---AGTGTGGGTGTGTCAGGC-----
ATGAAGTGTGGGTGTGTCAG-----
-----AGGCAGTGCATTGCTAGCT-----
-----AGGCAGTGCATTGCTAGCTG-----
-----AGGCAGTGCATTGCTAGCTGG-----
-----AGGCAGTGCATTGCTAGCTGGCTGTTA-----
-----AGGCAGTGCATTGCTAGCTGGCTGT-----
-----AGGCAGTGCATTGCTAGCTGGCTGTT-----
-----AGGCAGTGCATTGCTAGCTGGCT-----
-----GGCAGTGCATTGCTAGCTG-----
-----GGCAGTGCATTGCTAGCTGG-----
-----GGCAGGCAGTGCATTGCT-----
-----GGCAGGCAGTGCATTGCTA-----
-----CAGTGCATTGCTAGCTGGCTG-----
-----GCAGGCAGTGCATTGCTAG-----
```

-----TAAGG  
-----AGG  
-----ATAAGG  
-----AGG  
-----AAGG  
-----GGATAAGG

>mmu-mir-873

AAAATCAGTTTGTGTGCATTTGCAGGAACTTGTGAGTCTCCTATTGAAAATAGACAGGAGACTGACAAGTCCCGGGAACACCCACAAATCTTCCTACTGGTTTCTACCACCTTGCCTTGGACAGCACTCTGTGAC spec  
-----CAGTTTGTGTGCATTTGCA----- morL  
-----CAGTTTGTGTGCATTTGC----- morL  
AAAATCAGTTTGTGTGCATTTGCA----- morL  
--AATCAGTTTGTGTGCATTTGCA----- morL  
--AGTTTGTGTGCATTTGCA----- morL  
--ATCAGTTTGTGTGCATTTGCA----- morL  
-----GCAGGAACTTGTGAGTCTCCT----- mirL  
-----GCAGGAACTTGTGAGTCTCCTA----- mirL  
-----GCAGGAACTTGTGAGTCTCCTAT----- mirL  
-----TGCAGGAACTTGTGAGTCTCC----- mirL  
-----TGCAGGAACTTGTGAGTCTCCTAT----- mirL  
-----TGCAGGAACTTGTGAGTCTCCT----- mirL  
-----GCAGGAACTTGTGAGTCTCCTATT----- mirL  
-----GCAGGAACTTGTGAGTCT----- mirL  
-----TGCAGGAACTTGTGAGTCTCCTA----- mirL  
-----TGCAGGAACTTGTGAGTCT----- mirL  
-----GCAGGAACTTGTGAGTCTCC----- mirL  
-----AGGAACTTGTGAGTCTCCT----- mirL  
-----TGCAGGAACTTGTGAGTCTC----- mirL  
-----TGCAGGAACTTGTGAGTCTCCTATT----- mirL  
-----GCAGGAACTTGTGAGTCTCCTATTG----- mirL  
-----TTTGCAGGAACTTGTGAG----- mirL  
-----CAGGAACTTGTGAGTCTCCTAT----- mirL  
-----AGGAACTTGTGAGTCTCC----- mirL  
-----TTGCAGGAACTTGTGAGT----- mirL  
-----CAGGAACTTGTGAGTCTC----- mirL  
-----TGGACAGCACTCTGTGAC----- mirR  
-----TTGGACAGCACTCTGTGA----- mirR  
-----CCTTGGACAGCACTCTGT----- mirR  
-----TTGGACAGCACTCTGTGAC----- mirR

>mmu-mir-1936

| sequence                                                                                      | species | len | reads |
|-----------------------------------------------------------------------------------------------|---------|-----|-------|
| CATCTCTTAGTATAGGGGGTGAAGGGGAGGCCAGTCACACAGAGGACTTTAGTCTGAGAAATTGAAACTAACTGACCTGCTGTGAACTGGCCT | morL    | 18  | 1     |
| ---CTCTTAGTATAGGGGGTG---                                                                      | morL    | 22  | 1     |
| --TCTCTTAGTATAGGGGGTGAAG--                                                                    | morL    | 22  | 1     |
| CATCTCTTAGTATAGGGGGTGA                                                                        | morL    | 22  | 1     |
| -ATCTCTTAGTATAGGGGG-                                                                          | morL    | 18  | 1     |

```

-----AAGGGGAGGCCAGTCACA----- mirL 18 4
-----GAAGGGGAGGCCAGTCAC----- mirL 18 2
-----GGGGAGGCCAGTCACACA----- mirL 18 2
-----TGAAGGGGAGGCCAGTCA----- mirL 18 1
-----AGGGGAGGCCAGTCACAC----- mirL 18 1
-----TGAAGGGGAGGCCAGTCAC----- mirL 19 1
-----TAAGTACCTGCTGTGAACTG---- mirR 21 233
-----TAAGTACCTGCTGTGAACTGG--- mirR 22 217
-----TAAGTACCTGCTGTGAACT--- mirR 20 102
-----TAAGTACCTGCTGTGAACTGGC-- mirR 23 99
-----AACTGACCTGCTGTGAACTGG-- mirR 21 32
-----TAAGTACCTGCTGTGAACT--- mirR 19 19
-----ACTGACCTGCTGTGAACTGG-- mirR 20 18
-----TAAGTACCTGCTGTGAACTGGCC- mirR 24 16
-----ACTGACCTGCTGTGAACTG--- mirR 19 10
-----TAAGTACCTGCTGTGAACTGGCCT mirR 25 7
-----AACTGACCTGCTGTGAACTGGC-- mirR 22 6
-----AACTGACCTGCTGTGAACT---- mirR 19 6
-----ACTGACCTGCTGTGAACT---- mirR 18 6
-----AACTGACCTGCTGTGAACT---- mirR 18 5
-----AACTGACCTGCTGTGAACTG--- mirR 20 4
-----CTGACCTGCTGTGAACTG--- mirR 18 4
-----CTAACTGACCTGCTGTGAACTG--- mirR 22 3
-----AACTGACCTGCTGTGAACTGGCC- mirR 23 3
-----CTAACTGACCTGCTGTGAACTG--- mirR 18 2
-----AACTGACCTGCTGTGAACTGGCCT mirR 24 2

```

>mmu-mir-466d

| Species                                          | len     | reads     |
|--------------------------------------------------|---------|-----------|
| CATATACATACACGCACACATAGATACGCACGCACACACACACAGGGA | species | len reads |
| --TATACATACACGCACACATAGA-----                    | mirR 22 | 139       |
| ---ATACATACACGCACACATAGA-----                    | mirR 21 | 96        |
| ---ATACATACACGCACACATAGAT-----                   | mirR 22 | 89        |
| --TATACATACACGCACACATAG-----                     | mirR 21 | 80        |
| ---ATACATACACGCACACATAG-----                     | mirR 20 | 78        |
| ---TACATACACGCACACATAGA-----                     | mirR 20 | 54        |
| -ATATACATACACGCACACATAG-----                     | mirR 22 | 41        |
| CATATACATACACGCACACATAG-----                     | mirR 23 | 37        |
| ---ACATACACGCACACATAGA-----                      | mirR 19 | 20        |
| ---TACATACACGCACACATAG-----                      | mirR 19 | 15        |
| CATATACATACACGCACACATAGA-----                    | mirR 24 | 12        |
| ---ATACATACACGCACACATAGATA-----                  | mirR 23 | 9         |
| -ATATACATACACGCACACATAGA-----                    | mirR 23 | 5         |
| ---ACATACACGCACACATAGAT-----                     | mirR 20 | 5         |
| ---ATACATACACGCACACATAGATAC-----                 | mirR 24 | 4         |
| ---TACATACACGCACACATAGATA-----                   | mirR 22 | 4         |
| --TATACATACACGCACACATAGAT-----                   | mirR 23 | 2         |

```
CATATACATACACGCACACATAGAT----- mirR 25 1
----TACATACACGCACACATAGAT----- mirR 21 1
-----TACGCACGCACACACACACAG--- morR 23 57
-----TACGCACGCACACACACACAGG-- morR 24 23
-----TACGCACGCACACACACACAGGG- morR 25 10
-----AGATACGCACGCACACACACAC- morR 22 7
-----CGCACGCACACACACACACAG--- morR 21 5
-----GATACGCACGCACACACACAC- morR 23 2
-----TACGCACGCACACACACACAGGGA morR 26 2
-----AGATACGCACGCACACACACA- morR 21 1
-----GATACGCACGCACACACA- morR 18 1
-----GCACGCACACACACACACAGG-- morR 21 1
-----ACGCACGCACACACACACAG--- morR 22 1
-----AGATACGCACGCACACACA- morR 19 1
-----GCACGCACACACACACAG--- morR 20 1
-----GATACGCACGCACACACA- morR 20 1
```

>mmu-mir-682

```
AAGATGAAGAGACGAGCCGTCGGCATCTGGCACTGTGGTTCCCTGCATGAAAACAGTGGCCGGCGGGGCTGGACCTACAACACCCTCTGCAGTCACAGTGAAGTCTGCCATCAGAAGACTGAAGGAAGTGAAGACCA
----TGAAGAGACGAGCCGTCGGCATC-----
-----GAGCCGTCGGCATCTGGCA-----
AAGATGAAGAGACGAGCCGTCGGCATCTGGCAC-----
-----AGCCGTCGGCATCTGGCA-----
-----CGAGCCGTCGGCATCTGG-----
-----GAAGAGACGAGCCGTCGGCATCTGG-----
-----AGACGAGCCGTCGGCATC-----
-----CACTGTGGTTCCCTGCATGA-----
-----TGGCACTGTGGTTCCCTGCATGAAAACAGTGGCC-----
-----ACTGTGGTTCCCTGCATGA-----
-----TGTGGTTCCCTGCATGAAAACAGTGGCCGGCGGGC-----
-----GGCACTGTGGTTCCCTGCAT-----
-----ACTGTGGTTCCCTGCATGAA-----
-----TGTGGTTCCCTGCATGAAAACAGTGGCCGGC-----
-----CTGCAGTCACAGTGAAGTCTG-----
-----CTGCAGTCACAGTGAAGTCT-----
-----CTGCAGTCACAGTGAAGTC-----
-----CTGCAGTCACAGTGAAGT-----
-----CAGTCACAGTGAAGTCTG-----
-----GCAGTCACAGTGAAGTCTGCCA-----
-----CAGTCACAGTGAAGTCTGC-----
-----GCAGTCACAGTGAAGTCTG-----
-----CCTCTGCAGTCACAGTGA-----
-----TGCAGTCACAGTGAAGTCTG-----
-----TCTGCAGTCACAGTGAAG-----
-----TCTGCAGTCACAGTGAAGTCTG-----
-----GCAGTCACAGTGAAGTCT-----
```



```

-----CCTCTGCAGTCACAGTGAAG-----
-----TGCAGTCACAGTGAAGTCT-----
-----CTGCAGTCACAGTGAAGTCTGC-----
-----CCATCAGAAGACTGAAGGAAGTGAAGACCA-----
-----ATCAGAAGACTGAAGGAA-----
-----CCATCAGAAGACTGAAGGAAGTGAAGAC-----
-----ATCAGAAGACTGAAGGAAC-----
-----TCAGAAGACTGAAGGAAGT-----
-----TCAGAAGACTGAAGGAAGT-----
-----GCCATCAGAAGACTGAAGGA-----
-----TCAGAAGACTGAAGGAAGTGA-----
-----CATCAGAAGACTGAAGGAAGT-----
-----CTGCCATCAGAAGACTGAAGGAA-----
-----CCATCAGAAGACTGAAGG-----
-----CCATCAGAAGACTGAAGGAAGTGAAGACC-----
-----TCAGAAGACTGAAGGAAC-----
-----CATCAGAAGACTGAAGGAAGTGAAG-----

```

>mmu-mir-3101

| GCAGCAGGTGGGGTAGGTAGCAGGTACCATTGACTAAAGCTAGTACTATAGGCTGCCTCTAGCTTTGGTGGATGGTCTTTGCTAAGTTCTCTGCCAACCCAG | species | len | reads |
|--------------------------------------------------------------------------------------------------------|---------|-----|-------|
| GCAGCAGGTGGGGTAGGTA                                                                                    | morL    | 19  | 1     |
| -GTGGGGTAGGTAGCAGGT                                                                                    | morL    | 18  | 1     |
| -GGTGGGGTAGGTAGCAGGT                                                                                   | morL    | 19  | 1     |
| -GGTACCATTGACTAAAGCTAG                                                                                 | mirL    | 21  | 578   |
| -GGTACCATTGACTAAAGCTAGT                                                                                | mirL    | 22  | 51    |
| -GGTACCATTGACTAAAGCTA                                                                                  | mirL    | 20  | 44    |
| -AGGTACCATTGACTAAAGCTAG                                                                                | mirL    | 22  | 16    |
| -CAGGTACCATTGACTAAAGCTAG                                                                               | mirL    | 23  | 8     |
| -GGTACCATTGACTAAAGCT                                                                                   | mirL    | 19  | 7     |
| -GGTACCATTGACTAAAGCTAGTA                                                                               | mirL    | 23  | 5     |
| -AGGTACCATTGACTAAAGCTAGT                                                                               | mirL    | 23  | 4     |
| -TACCATTGACTAAAGCTA                                                                                    | mirL    | 18  | 3     |
| -CAGGTACCATTGACTAAAGCTA                                                                                | mirL    | 22  | 2     |
| -CAGGTACCATTGACTAAAGCT                                                                                 | mirL    | 21  | 1     |
| -GTACCATTGACTAAAGCTAG                                                                                  | mirL    | 20  | 1     |
| -TATAGGCTTGCCTCTAGC                                                                                    | loop    | 18  | 1     |
| -CTATAGGCTTGCCTCTAG                                                                                    | loop    | 18  | 1     |
| -ACTATAGGCTTGCCTCTA                                                                                    | loop    | 18  | 1     |
| -AGCTTTGGTGGATGGTCTTTGC                                                                                | mirR    | 22  | 45    |
| -AGCTTTGGTGGATGGTCT                                                                                    | mirR    | 18  | 3     |
| -AGCTTTGGTGGATGGTCTTTGCTA                                                                              | mirR    | 24  | 3     |
| -AGCTTTGGTGGATGGTCTTTG                                                                                 | mirR    | 21  | 2     |
| -TAGCTTTGGTGGATGGTCTTT                                                                                 | mirR    | 21  | 2     |
| -TAGCTTTGGTGGATGGTCTTTG                                                                                | mirR    | 22  | 2     |
| -GCTTTGGTGGATGGTCTTT                                                                                   | mirR    | 19  | 1     |
| -TAGCTTTGGTGGATGGTCTTTGC                                                                               | mirR    | 23  | 1     |

```

-----AGCTTTGGTGGATGGTCTTTGCT----- mirR 23 1
-----AGCTTTGGTGGATGGTCTTT----- mirR 20 1
-----CTAGCTTTGGTGGATGGTC----- mirR 19 1
-----CTAGCTTTGGTGGATGGTCTTT----- mirR 22 1
-----GCTTTGGTGGATGGTCTT----- mirR 18 1
-----AGCTTTGGTGGATGGTCTT----- mirR 19 1
-----GCTAAGTTCTCTGCCAAC--- morR 19 3
-----GCTAAGTTCTCTGCCAAC--- morR 18 2
-----AGTTCTCTGCCAACCCAG morR 18 1
-----AAGTTCTCTGCCAACCA- morR 18 1

```

>mmu-mir-678

```

TGTGACTTGCAGAGCTGTGCTCCAATATGAGAGATGGCCATGCACCCGTGTCTCGGTGCAAGGACTGGAGGTGGCAGTGTGCCAGTGGACTC species len reads
TGTGACTTGCAGAGCTGT----- morL 18 1
---GACTTGCAGAGCTGTGCT----- morL 18 1
TGTGACTTGCAGAGCTGTG----- morL 19 1
-----TCCAATATGAGAGATGGC----- mirL 18 141
-----TCCAATATGAGAGATGGCC----- mirL 19 10
-----CCAATATGAGAGATGGCC----- mirL 18 4
-----GTCTCGGTGCAAGGACTGGAG----- mirR 22 290
-----GTCTCGGTGCAAGGACTGGAG----- mirR 21 254
-----GTCTCGGTGCAAGGACTGG----- mirR 19 28
-----GTCTCGGTGCAAGGACTG----- mirR 18 13
-----CTCGGTGCAAGGACTGGAG----- mirR 19 6
-----GTCTCGGTGCAAGGACTGGA----- mirR 20 5
-----GTCTCGGTGCAAGGACTGGAGGT----- mirR 23 4
-----GTGTCTCGGTGCAAGGACT----- mirR 19 4
-----CTCGGTGCAAGGACTGGAG----- mirR 20 3
-----TCGGTGCAAGGACTGGAG----- mirR 19 3
-----TCTCGGTGCAAGGACTGGAG----- mirR 21 2
-----TGTCTCGGTGCAAGGACT----- mirR 18 2
-----GTGTCTCGGTGCAAGGAC----- mirR 18 1
-----TCTCGGTGCAAGGACTGGAG----- mirR 20 1
-----CTCGGTGCAAGGACTGGA----- mirR 18 1
-----AGGTGGCAGTGTGCCAG----- morR 18 2
-----GGTGGCAGTGTGCCAGTG----- morR 19 1
-----TGGCAGTGTGCCAGTGGACTC morR 22 1
-----CAGTGTGCCAGTGGACT- morR 18 1
-----AGGTGGCAGTGTGCCAGTGG--- morR 21 1
-----GCAGTGTGCCAGTGGAC-- morR 18 1

```

>mmu-mir-876

```

CATTACATAAACTGTCACGTGCTATGGATTTCTCTGTGAATCACTATATCAAATCTAGTGTGGTAGTGGTTTACAAAGTAATTCATAGTGCTTCACAGGTGCTCC species len reads
-----ATAAACTGTCACGTGCTA----- morL 18 3
CATTACATAAACTGTCACGTG----- morL 21 1
-----ACATAAACTGTCACGTGCT----- morL 19 1

```

```

-----AACTGTCACGTGCTATGG----- morL 18 1
-----TGGATTTCTCTGTGAATCACTA----- mirL 22 263
-----TGGATTTCTCTGTGAATCACT----- mirL 21 72
-----GGATTTCTCTGTGAATCACTA----- mirL 21 11
-----TGGATTTCTCTGTGAATCAC----- mirL 20 4
-----TGGATTTCTCTGTGAATCA----- mirL 19 2
-----GATTTCTCTGTGAATCAC----- mirL 18 1
-----GATTTCTCTGTGAATCACTA----- mirL 20 1
-----ATTTCTCTGTGAATCACTA----- mirL 19 1
-----TGGATTTCTCTGTGAATC----- mirL 18 1
-----GGATTTCTCTGTGAATCACT----- mirL 20 1
-----TGGATTTCTCTGTGAATCACTAT----- mirL 23 1
-----TATCAAATCTAGTGTGGT----- loop 18 2
-----ATATCAAATCTAGTGTGG----- loop 18 1
-----ATATCAAATCTAGTGTGGT----- loop 19 1
-----ATCAAATCTAGTGTGGTA----- loop 18 1
-----TAGTGGTTTACAAAGTAATTCA----- mirR 22 253
-----TAGTGGTTTACAAAGTAATT----- mirR 20 54
-----TAGTGGTTTACAAAGTAAT----- mirR 19 32
-----AGTGGTTTACAAAGTAATTCA----- mirR 21 29
-----GTGGTTTACAAAGTAATT----- mirR 18 14
-----GTAGTGGTTTACAAAGTAATTCA----- mirR 23 8
-----TAGTGGTTTACAAAGTAATTC----- mirR 21 3
-----GTGGTTTACAAAGTAATTCAT----- mirR 21 2
-----TAGTGGTTTACAAAGTAA----- mirR 18 2
-----GTGGTTTACAAAGTAATTCA----- mirR 20 1
-----GGTAGTGGTTTACAAAGT----- mirR 18 1
-----AGTGGTTTACAAAGTAATT----- mirR 19 1
-----GTAGTGGTTTACAAAGTA----- mirR 18 1
-----TCATAGTGCTTCACAGGT----- morR 18 5
-----ATAGTGCTTCACAGGTGC----- morR 18 2
-----GTGCTTCACAGGTGCTCC----- morR 18 1
-----CATAGTGCTTCACAGGTG----- morR 18 1
-----AGTGCTTCACAGGTGCTC----- morR 18 1

```

>mmu-mir-1298

```

GGAGAGATGAGGGGTTAAGAGTTTCATTCGGCTGTCCAGATGTACCCAAGTACCCTGTTATTTGGCAATACATACATCTGGGCAACTGATTGAACTTT species len reads
-----GATGAGGGGTTAAGAGTT----- morL 18 1
GGAGAGATGAGGGGTTAA----- morL 18 1
--AGAGATGAGGGGTTAAGA----- morL 18 1
-----TTCATTCGGCTGTCCAGATGT----- mirL 21 293
-----TTCATTCGGCTGTCCAGATG----- mirL 20 269
-----TTCATTCGGCTGTCCAGAT----- mirL 19 61
-----TCATTCGGCTGTCCAGATG----- mirL 19 34
-----TCATTCGGCTGTCCAGATGT----- mirL 20 29
-----TTCATTCGGCTGTCCAGATGTA----- mirL 22 28

```

```

-----TTCATTCGGCTGTCCAGATGTAC----- mirL 23 10
-----TTCATTCGGCTGTCCAGA----- mirL 18 9
-----TCATTCGGCTGTCCAGAT----- mirL 18 6
-----ATTCGGCTGTCCAGATGT----- mirL 18 5
-----TCATTCGGCTGTCCAGATGTA----- mirL 21 4
-----GAGTTCATTCGGCTGTCCA----- mirL 19 3
-----ATTCGGCTGTCCAGATGTA----- mirL 19 1
-----CATTCGGCTGTCCAGATG----- mirL 18 1
-----CCAAGTACCCTGTTATTT----- loop 18 1
-----TTTGGCAATACATACATC----- mirR 18 9
-----TTTGGCAATACATACATCTGGG----- mirR 22 1
-----CTGGGCAACTGATTGAAC----- morR 18 5
-----GGGCAACTGATTGAACTTT morR 19 1
-----ATCTGGGCAACTGATTGA----- morR 18 1
-----GGCAACTGATTGAACTTT morR 18 1

```

>mmu-mir-1966

```

ATGCATGTAGAATAGTGTGGGAAGGGAGCTGGCTCAGGAGAGAGTCCTGAGATTTAGGCTCTTTCTGACTCAACTCTCCCTTAGCAAGTCAAGTCCATTGAAC species len reads
--GCATGTAGAATAGTGTGG-- morL 18 1
--CATGTAGAATAGTGTGG-- morL 18 1
ATGCATGTAGAATAGTGT-- morL 18 1
-----AAGGGAGCTGGCTCAGGAGAGAGTC----- mirL 25 560
-----AGGGAGCTGGCTCAGGAGAGAGTC----- mirL 24 48
-----AAGGGAGCTGGCTCAGGAGAGAGT----- mirL 24 30
-----AAGGGAGCTGGCTCAGGAGAGAGA----- mirL 22 21
-----AAGGGAGCTGGCTCAGGAGAGAG----- mirL 23 15
-----GGGAGCTGGCTCAGGAGAGAGTC----- mirL 23 12
-----AAGGGAGCTGGCTCAGGAG----- mirL 19 10
-----AAGGGAGCTGGCTCAGGA----- mirL 18 8
-----GGAGCTGGCTCAGGAGAGAGA----- mirL 19 8
-----GGGAGCTGGCTCAGGAGAGA----- mirL 18 6
-----AAGGGAGCTGGCTCAGGAGAGA----- mirL 20 6
-----GGAGCTGGCTCAGGAGAGAGTC----- mirL 22 6
-----AGGGAGCTGGCTCAGGAGAGA----- mirL 19 5
-----AGGGAGCTGGCTCAGGAGAGAGA----- mirL 21 4
-----AGGGAGCTGGCTCAGGAG----- mirL 18 3
-----GAAGGGAGCTGGCTCAGGAGAGAGTC----- mirL 26 2
-----GGAGCTGGCTCAGGAGAG----- mirL 18 1
-----GGGAGCTGGCTCAGGAGAG----- mirL 19 1
-----GGAGCTGGCTCAGGAGAGAG----- mirL 20 1
-----CCTGAGATTTAGGCTCTT----- loop 18 2
-----CTGAGATTTAGGCTCTTT----- loop 18 2
-----TTTCTGACTCAACTCTCCCTT----- mirR 21 3
-----TTTCTGACTCAACTCTCCC----- mirR 19 1
-----TCTGACTCAACTCTCCCTTA----- mirR 20 1
-----TCTGACTCAACTCTCCCTT----- mirR 19 1

```

C:\Documents and Settings\hong\Desktop\Reprogramming-total RNA.txt

```
-----TTCTGACTCAACTCTCCCTTA----- mirR 21 1
-----TTCTGACTCAACTCTCCCTT----- mirR 20 1
-----CTGACTCAACTCTCCCTT----- mirR 18 1
-----TCTGACTCAACTCTCCCT----- mirR 18 1
-----AAGTCAAGTCCATTGAAC morR 18 3
-----TAGCAAGTCAAGTCCATTG--- morR 19 1
```

>mmu-mir-3082

```
TGACATGAGTGCCCTGGTGGACAGAGTGTGTGTGTCTGTGTGGAGACAGGAGTTGCCACACATGGCACTCAACTCTGCAGGATAAATACATGGCAGATATGGATGAGCTCTTC species len reads
---CATGAGTGCCCTGGTGGA----- morL 18 5
TGACATGAGTGCCCTGGT----- morL 18 1
---ATGAGTGCCCTGGTGGAC----- morL 18 1
--ACATGAGTGCCCTGGTGG----- morL 18 1
-----CAGAGTGTGTGTCTGTGTG----- mirL 21 324
-----CAGAGTGTGTGTCTGTG----- mirL 19 96
-----CAGAGTGTGTGTCTGTGT----- mirL 20 45
-----GACAGAGTGTGTGTCTGTGT----- mirL 22 38
-----GGACAGAGTGTGTGTCTGTGT----- mirL 23 17
-----CAGAGTGTGTGTCTGTGTGGA----- mirL 23 16
-----CAGAGTGTGTGTCTGTGTGG----- mirL 22 14
-----GACAGAGTGTGTGTCTGTGTG----- mirL 23 13
-----ACAGAGTGTGTGTCTGTGTGG----- mirL 23 10
-----GAGTGTGTGTCTGTGT----- mirL 18 7
-----CAGAGTGTGTGTCTGT----- mirL 18 7
-----ACAGAGTGTGTGTCTGTGT----- mirL 21 5
-----AGAGTGTGTGTCTGTGT----- mirL 19 5
-----GACAGAGTGTGTGTCTGTGTGG----- mirL 24 5
-----AGTGTGTGTGTCTGTGTG----- mirL 18 5
-----ACAGAGTGTGTGTCTGTGTGGAG----- mirL 25 5
-----GGACAGAGTGTGTGTGTC----- mirL 18 4
-----GACAGAGTGTGTGTCTGTGTGGAG----- mirL 26 4
-----AGAGTGTGTGTCTGTG----- mirL 18 3
-----CAGAGTGTGTGTCTGTGTGGAG----- mirL 24 3
-----ACAGAGTGTGTGTCTGT----- mirL 19 3
-----ACAGAGTGTGTGTCTG----- mirL 18 2
-----AGAGTGTGTGTCTGTGTG----- mirL 20 2
-----AGTGTGTGTGTCTGTGTGGAG----- mirL 21 2
-----AGAGTGTGTGTCTGTGTGG----- mirL 21 2
-----ACAGAGTGTGTGTCTGTGTG----- mirL 22 2
-----GACAGAGTGTGTGTCT----- mirL 18 1
-----GAGTGTGTGTGTCTGTGTGGAG----- mirL 22 1
-----GAGTGTGTGTGTCTGTGTG----- mirL 19 1
-----GGAGACAGGAGTTGCCCA----- loop 18 9
-----TGGAGACAGGAGTTGCCAC----- loop 20 2
-----TGGAGACAGGAGTTGCCACAC----- loop 22 2
-----GACAGGAGTTGCCACAC----- loop 18 1
```

```

-----TGGAGACAGGAGTTGCC----- loop 18 1
-----GAGACAGGAGTTGCCAC----- loop 18 1
-----CACATGGCACTCAACTCTGCAG----- mirR 22 30
-----ACATGGCACTCAACTCTGCAGG----- mirR 22 13
-----ACACATGGCACTCAACTCTGCA----- mirR 22 10
-----ACACATGGCACTCAACTCTGCAG----- mirR 23 8
-----CACATGGCACTCAACTCTGCAGG----- mirR 23 5
-----CATGGCACTCAACTCTGCAG----- mirR 20 4
-----ACACATGGCACTCAACTCTG----- mirR 20 4
-----CACATGGCACTCAACTCTGCA----- mirR 21 4
-----ACATGGCACTCAACTCTG----- mirR 18 3
-----CACATGGCACTCAACTCTGCAGGA----- mirR 24 3
-----ACACATGGCACTCAACTCTGCAGG----- mirR 24 2
-----ACACATGGCACTCAACTCTGC----- mirR 21 2
-----CATGGCACTCAACTCTGCAGG----- mirR 21 2
-----CACACATGGCACTCAACTCTGC----- mirR 22 1
-----CATGGCACTCAACTCTGCAGGA----- mirR 22 1
-----ACATGGCACTCAACTCTGCAGGA----- mirR 23 1
-----CACATGGCACTCAACTCT----- mirR 18 1
-----ACATGGCACTCAACTCTGCAG----- mirR 21 1
-----ACATGGCACTCAACTCTGCA----- mirR 20 1
-----CAGGATAAATACATGGCA----- morR 18 2
-----ATAAATACATGGCAGATA----- morR 18 1
-----GGATAAATACATGGCAGATATGGATGAGCTCTTC morR 34 1

```

>mmu-mir-3078

```

ACCAAGTACCCATGCGACTGGCAGACTGCCCCAAAGCCTAGACTGCAGCTACCTTGTATTGTGCTTGGGGTTGCTGGGGTAGTCTTTAGGGGAAGCTGTTTGTACCCGTTGGTG species len reads
-----ATGCGACTGGCAGACTGCCCC----- morL 21 15
---AGTACCCATGCGACTGGCAGACTGC----- morL 25 10
-----ATGCGACTGGCAGACTGCCCCA----- morL 22 7
-----GCGACTGGCAGACTGCCCCA----- morL 20 5
-----TGCGACTGGCAGACTGCCC----- morL 19 4
-----ATGCGACTGGCAGACTGCCC----- morL 20 4
-----GACTGGCAGACTGCCCCA----- morL 18 3
-----TGCGACTGGCAGACTGCCCCA----- morL 21 3
-----ACTGGCAGACTGCCCCAA----- morL 18 2
-----CATGCGACTGGCAGACTGCCC----- morL 21 2
-----CGACTGGCAGACTGCCCC----- morL 18 2
-----CCCATGCGACTGGCAGACTGCCCC----- morL 24 1
-----ATGCGACTGGCAGACTGCCCCAA----- morL 23 1
-----TGCGACTGGCAGACTGCC----- morL 18 1
-----CCATGCGACTGGCAGACTGCC----- morL 21 1
-----GCGACTGGCAGACTGCCCC----- morL 19 1
ACCAAGTACCCATGCGACTGGCAGACTGCCCC----- morL 32 1
-----CAAAGCCTAGACTGCAGCTACCT----- mirL 23 250
-----AAAGCCTAGACTGCAGCTACCT----- mirL 22 145

```

```

-----CAAAGCCTAGACTGCAGCTACC----- mirL 22 27
-----AAAGCCTAGACTGCAGCTACC----- mirL 21 26
-----CAAAGCCTAGACTGCAGCTACCTTG----- mirL 25 10
-----CCAAAGCCTAGACTGCAGCTACC----- mirL 23 9
-----CAAAGCCTAGACTGCAGCTAC----- mirL 21 8
-----AAGCCTAGACTGCAGCTACCT----- mirL 21 7
-----AAGCCTAGACTGCAGCTACC----- mirL 20 6
-----CAAAGCCTAGACTGCAGCTACCTTGT----- mirL 26 6
-----CAAAGCCTAGACTGCAGCTACCTT----- mirL 24 5
-----AAAGCCTAGACTGCAGCTACCTT----- mirL 23 3
-----CAAAGCCTAGACTGCAGCTA----- mirL 20 2
-----AAAGCCTAGACTGCAGCTAC----- mirL 20 2
-----AAGCCTAGACTGCAGCTACCTTGT----- mirL 24 1
-----AAAGCCTAGACTGCAGCTA----- mirL 19 1
-----CCCAAAGCCTAGACTGCA----- mirL 18 1
-----CTGTATTGTGCTTGGGG----- loop 18 4
-----GTTGCTGGGGTAGTCTTTAGG----- mirR 21 37
-----TTGCTGGGGTAGTCTTTAGGGGA----- mirR 23 36
-----TTGCTGGGGTAGTCTTTAGGGGA----- mirR 24 15
-----TTGCTGGGGTAGTCTTTAGGG----- mirR 21 10
-----TTGCTGGGGTAGTCTTTAGGG----- mirR 22 9
-----TTGCTGGGGTAGTCTTTAGGGGAAGC----- mirR 26 6
-----TTGCTGGGGTAGTCTTTAGGGGAAG----- mirR 25 5
-----GTTGCTGGGGTAGTCTTTAGGGGA----- mirR 25 4
-----GGGTTGCTGGGGTAGTCTTTAGGG----- mirR 25 4
-----GTTGCTGGGGTAGTCTTTAGGG----- mirR 22 3
-----TGCTGGGGTAGTCTTTAGGGGAAGC----- mirR 25 3
-----GGTTGCTGGGGTAGTCTTTAGG----- mirR 22 3
-----GGTTGCTGGGGTAGTCTTTAGGG----- mirR 23 2
-----TTGCTGGGGTAGTCTTTAGG----- mirR 20 2
-----GGGTTGCTGGGGTAGTC----- mirR 18 1
-----GTTGCTGGGGTAGTCTTT----- mirR 18 1
-----GTTGCTGGGGTAGTCTTTAG----- mirR 20 1
-----TGCTGGGGTAGTCTTTAGGGGA----- mirR 22 1
-----GTTGCTGGGGTAGTCTTTAGGGGAAG----- mirR 26 1
-----GGGAAGCTGTTTGTACCC----- morR 18 11
-----AGGGGAAGCTGTTTGTCA----- morR 18 7
-----GAAGCTGTTTGTACCCCG----- morR 18 4
-----AAGCTGTTTGTACCCCGT----- morR 18 3
-----GGAAGCTGTTTGTACCC----- morR 18 3
-----AGCTGTTTGTACCCGTTGGT----- morR 21 2
-----GGAAGCTGTTTGTACCCCG----- morR 19 2
-----AGCTGTTTGTACCCGTTGGT----- morR 22 2
-----AAGCTGTTTGTACCCGTTGGT----- morR 22 1
-----GGGGAAGCTGTTTGTACCC----- morR 19 1
-----GGGAAGCTGTTTGTACCC----- morR 19 1

```

```

-----AGGGGAAGCTGTTTGTGCAC----- morR 19 1
-----AGCTGTTTGTACCCGTT----- morR 18 1

>mmu-mir-297c
AGTATATATGCCTGTGTATATGTATGTGTGCATGTACATGTGTATATGAATATACATATACATACACACATACCCATACAAACATGCATACAAACACAAAAATTGGCACTCATCCATCT species len r
---ATATATGCCTGTGTGTAT----- morL 18 3
AGTATATATGCCTGTGTG----- morL 18 1
-GTATATATGCCTGTGTGTAT----- morL 20 1
-GTATATATGCCTGTGTGTA----- morL 19 1
---TATGCCTGTGTGTATATG----- morL 18 1
---ATATGCCTGTGTGTATAT----- morL 18 1
-----ATGTATGTGTGCATGTACATGT----- mirL 22 562
-----ATGTATGTGTGCATGTACATG----- mirL 21 37
-----ATGTATGTGTGCATGTACATGTG----- mirL 23 35
-----ATGTATGTGTGCATGTACA----- mirL 19 20
-----ATGTATGTGTGCATGTACATGTGT----- mirL 24 15
-----GTATGTGTGCATGTACATGT----- mirL 20 10
-----ATGTATGTGTGCATGTACAT----- mirL 20 9
-----ATGTATGTGTGCATGTAC----- mirL 18 8
-----TATATGTATGTGTGCATGTACA----- mirL 22 3
-----GTATGTGTGCATGTACATG----- mirL 19 3
-----TATGTATGTGTGCATGTACATGT----- mirL 23 3
-----ATATGTATGTGTGCATGTACAT----- mirL 22 3
-----GTATGTGTGCATGTACATGTG----- mirL 21 3
-----ATATGTATGTGTGCATGTA----- mirL 19 2
-----GTATGTGTGCATGTACATGTGT----- mirL 22 2
-----TATGTATGTGTGCATGTA----- mirL 18 2
-----TATATGTATGTGTGCATGTAC----- mirL 21 2
-----TGTATGTGTGCATGTACATGT----- mirL 21 1
-----TATATGTATGTGTGCATGTA----- mirL 20 1
-----TGTATGTGTGCATGTACATGTG----- mirL 22 1
-----TATGTGTGCATGTACATGTGTGT----- mirL 23 1
-----TATGTGTGCATGTACATGT----- mirL 19 1
-----TATGTATGTGTGCATGTACATG----- mirL 22 1
-----TATGTATGTGTGCATGTACAT----- mirL 21 1
-----TATGTATGTGTGCATGTACA----- mirL 20 1
-----ATACAAACACACAAAAAT----- mirR 18 8
-----GCATACAAACACACAAAAATT----- mirR 21 1
-----TACAAACACACAAAAATT----- mirR 18 1
-----GCATACAAACACACAAAAAT----- mirR 20 1
-----ACAAACACACAAAAATTGG----- mirR 19 1
-----GCATACAAACACACAAAA----- mirR 18 1
-----ATTGGCACTCATCCATCT morR 18 2

>mmu-mir-3074-1
TTGCTCAAGGGCTCGACTCCTGTTCTGCTGAACTGAGCCAGTGTGTGAAATGAGAAGTATATCAGCTCAGTAGGCACCGGAGGGCGGGTCCAATCACA species len reads

```



```

TTGCTCAAGGGCTCGACTC----- morL 19 3
----TCAAGGGCTCGACTCCTG----- morL 18 2
----CAAGGGCTCGACTCCTGT----- morL 18 1
-TGCTCAAGGGCTCGACTC----- morL 18 1
----AAGGGCTCGACTCCTGTT----- morL 18 1
--GCTCAAGGGCTCGACTCC----- morL 18 1
-----GTTCTGCTGAACTGAGCCAGT----- mirL 22 31
-----TGTTCTGCTGAACTGAGCCAG----- mirL 22 4
-----TGTTCTGCTGAACTGAGCCAGT----- mirL 23 3
-----TTCCTGCTGAACTGAGCC----- mirL 18 2
-----TGTTCTGCTGAACTGAG----- mirL 18 1
-----TGTTCTGCTGAACTGAGCC----- mirL 20 1
-----TCCTGCTGAACTGAGCCAG----- mirL 19 1
-----TTCCTGCTGAACTGAGCCAGTG----- mirL 22 1
-----TCCTGCTGAACTGAGCCAGT----- mirL 20 1
-----CTGTTCTGCTGAACTGA----- mirL 18 1
-----TTCCTGCTGAACTGAGCCAGT----- mirL 21 1
-----CCTGTTCTGCTGAACTGA----- mirL 19 1
-----CCTGCTGAACTGAGCCAGTG----- mirL 20 1
-----AGTGTGTGAAATGAGAAC----- loop 18 8
-----GTGTGTGAAATGAGAACT----- loop 18 1
-----GTGTGTGAAATGAGAACTGA----- loop 20 1
-----GTGTGAAATGAGAACTGA----- loop 18 1
-----TGTGTGAAATGAGAACTGA----- loop 19 1
-----GATATCAGCTCAGTAGGCACCG----- mirR 22 254
-----GATATCAGCTCAGTAGGCACCGG----- mirR 23 165
-----GATATCAGCTCAGTAGGCACCGGA----- mirR 24 55
-----GATATCAGCTCAGTAGGCACC----- mirR 21 53
-----TGATATCAGCTCAGTAGGCACCG----- mirR 23 38
-----GATATCAGCTCAGTAGGCACCGGAG----- mirR 25 33
-----TGATATCAGCTCAGTAGGCACCG----- mirR 24 20
-----ATATCAGCTCAGTAGGCACCG----- mirR 21 16
-----ATCAGCTCAGTAGGCACCG----- mirR 19 10
-----GATATCAGCTCAGTAGGCAC----- mirR 20 8
-----ATATCAGCTCAGTAGGCACCG----- mirR 22 8
-----TGATATCAGCTCAGTAGGCAC----- mirR 21 4
-----GATATCAGCTCAGTAGGCACCGGAG----- mirR 26 2
-----TGATATCAGCTCAGTAGGCACCGGA----- mirR 25 2
-----ATATCAGCTCAGTAGGCACCGGA----- mirR 23 2
-----ATCAGCTCAGTAGGCACCG----- mirR 20 2
-----ATATCAGCTCAGTAGGCAC----- mirR 19 1
-----GGAGGGCGGGTCCAATCA----- morR 18 2
-----GAGGGCGGGTCCAATCAC----- morR 18 1
-----CCGAGGGCGGGTCCAAT----- morR 18 1
-----AGGGCGGGTCCAATCACA----- morR 18 1
-----CGGAGGGCGGGTCCAATCA----- morR 19 1

```

>mmu-mir-144

```

CCTCCTCCTCCAGGACCTTGGCTGGGATATCATCATATACTGTAAGTTTGTGATGAGACACTACAGTATAGATGATGTACTAGTCTGGGTACCCACCTCCAGAGCCTGCCTGGTTTGCA species len reads
--TCCTCCTCCAGGACCTTGGCTG----- morL 22 2
CCTCCTCCTCCAGGACCTTGGC----- morL 22 1
-CTCCTCCTCCAGGACCTTGGC----- morL 21 1
-----CCAGGACCTTGGCTGGGA----- morL 18 1
---CTCCTCCAGGACCTTGGCT----- morL 19 1
---CCTCCTCCAGGACCTTGG----- morL 18 1
-----GGATATCATCATATACTGTAAG----- mirL 22 416
-----GGATATCATCATATACTGTAA----- mirL 21 163
-----TGGGATATCATCATATACTGT----- mirL 21 31
-----GGATATCATCATATACTGT----- mirL 19 20
-----GGATATCATCATATACTGTA----- mirL 20 19
-----GGATATCATCATATACTGTAAGT----- mirL 23 5
-----TGGGATATCATCATATACTGTAA----- mirL 23 4
-----TGGGATATCATCATATACTG----- mirL 20 3
-----TGGGATATCATCATATAC----- mirL 18 2
-----TATCATCATATACTGTAAG----- mirL 19 1
-----GGATATCATCATATACTGTAAGTT----- mirL 24 1
-----GGATATCATCATATACTG----- mirL 18 1
-----GATATCATCATATACTGT----- mirL 18 1
-----ATATCATCATATACTGTA----- mirL 18 1
-----GTCTGGGTACCCACCTC----- mirR 18 39
-----GTCTGGGTACCCACCTCC----- mirR 19 19
-----GTCTGGGTACCCACCTCCA----- mirR 20 2
-----TAGTCTGGGTACCCACCT----- mirR 19 1
-----CTAGTCTGGGTACCCAC----- mirR 18 1
-----CTGGGTACCCACCTCCA----- mirR 18 1
-----CAGAGCCTGCCTGGTTTG----- morR 18 3
-----CAGAGCCTGCCTGGTTTGC----- morR 19 1
-----AGAGCCTGCCTGGTTTGC----- morR 18 1
-----AGAGCCTGCCTGGTTTGCA----- morR 19 1
-----CTCCAGAGCCTGCCTGGT----- morR 18 1

```

>mmu-mir-1971

```

CAGGGCATCATTTGGTAAAGGCTGGGCTGAGAGGACATCTTTGTTCCATGGACCAGTAGATAGGCAGCTTCTGCTTCCAGGAACAACCTGTCTGTTTTTCAGTCTATCTACTTCCATAAATTTCAATTTGCTCACA spe
---GCATCATTTGGTAAAGGC----- mor
---GGCATCATTTGGTAAAGG----- mor
-AGGGCATCATTTGGTAAAG----- mor
-AGGGCATCATTTGGTAAAGGC----- mor
CAGGGCATCATTTGGTAAAG----- mor
-AGGGCATCATTTGGTAAAG----- mor
--GGGCATCATTTGGTAAAG----- mor
-----GGGCTGAGAGGACATCTT----- mir
-----GCTGGGCTGAGAGGACAT----- mir

```

```

-----GCTGAGAGGACATCTTTG----- mir
-----GGCTGAGAGGACATCTTT----- mir
-----GGGCTGAGAGGACATCTTT----- mir
-----TGGGCTGAGAGGACATCT----- mir
-----GCTGAGAGGACATCTTTGT----- mir
-----CTGAGAGGACATCTTTGT----- mir
-----AGTCTATCTACTTCCTAA----- mir
-----AGTCTATCTACTTCCTAAAA----- mir
-----AGTCTATCTACTTCCTAAA----- mir
-----GTCTATCTACTTCCTAAAA----- mir
-----GTCTATCTACTTCCTAAA----- mir
-----AGTCTATCTACTTCCTAAAAAT----- mir
-----GTCTATCTACTTCCTAAAAAT----- mir
-----AGTCTATCTACTTCCTAAAAAT----- mir
-----TTCAGTCTATCTACTTCC----- mir
-----CTATCTACTTCCTAAAAAT----- mir
-----TAAAAATTTCAATTTGCTC--- mor
-----AAATTTCAATTTGCTCAC- mor
-----AAATTTCAATTTGCTCACA mor

```

>mmu-mir-486

| Sequence                                                                                                      | species | len | reads |
|---------------------------------------------------------------------------------------------------------------|---------|-----|-------|
| TCTGATCTCGCCCTCCCTGAGGGTCTGTACTGAGCTGCCCGAGGTCCTTCACTGTGCTCAGCTCGGGGCAGCTCAGTACAGGATGCGTCAGGGTGGGAGACAACGGGGA | morL    | 18  | 2     |
| -----CTCGCCCTCCCTGAGGG-----                                                                                   | morL    | 19  | 2     |
| -----TCGCCCTCCCTGAGGGGTC-----                                                                                 | morL    | 18  | 2     |
| -----TCGCCCTCCCTGAGGGGT-----                                                                                  | morL    | 19  | 1     |
| -----TCTCGCCCTCCCTGAGGG-----                                                                                  | morL    | 22  | 1     |
| TCTGATCTCGCCCTCCCTGAGG-----                                                                                   | morL    | 21  | 1     |
| TCTGATCTCGCCCTCCCTGAG-----                                                                                    | morL    | 18  | 1     |
| -----TCTCGCCCTCCCTGAGGG-----                                                                                  | morL    | 18  | 1     |
| -----GATCTCGCCCTCCCTGAG-----                                                                                  | mirL    | 23  | 113   |
| -----TCCTGTACTGAGCTGCCCGAGG-----                                                                              | mirL    | 25  | 14    |
| -----TCCTGTACTGAGCTGCCCGAGGTC-----                                                                            | mirL    | 24  | 5     |
| -----TCCTGTACTGAGCTGCCCGAGGT-----                                                                             | mirL    | 27  | 1     |
| -----TCCTGTACTGAGCTGCCCGAGGTCCT-----                                                                          | mirL    | 24  | 1     |
| -----CCTGTACTGAGCTGCCCGAGGTC-----                                                                             | mirL    | 23  | 1     |
| -----GTCTGTACTGAGCTGCCCGAG-----                                                                               | mirL    | 19  | 1     |
| -----GGTCTGTACTGAGCTGC-----                                                                                   | mirL    | 18  | 1     |
| -----GGTCTGTACTGAGCTGC-----                                                                                   | loop    | 21  | 1     |
| -----GGTCTGTACTGAGCTGC-----GGTCTTCACTGTGCTCAGCT-----                                                          | mirR    | 21  | 534   |
| -----CGGGGCAGCTCAGTACAGGAT-----                                                                               | mirR    | 22  | 30    |
| -----CGGGGCAGCTCAGTACAGGATG-----                                                                              | mirR    | 19  | 4     |
| -----GGGCAGCTCAGTACAGGAT-----                                                                                 | mirR    | 20  | 4     |
| -----GGGGCAGCTCAGTACAGGAT-----                                                                                | mirR    | 18  | 4     |
| -----GGCAGCTCAGTACAGGAT-----                                                                                  | mirR    | 22  | 3     |
| -----TCGGGGCAGCTCAGTACAGGAT-----                                                                              | mirR    | 23  | 3     |
| -----CGGGGCAGCTCAGTACAGGATGC-----                                                                             |         |     |       |

```
-----CTCGGGGCAGCTCAGTACAGGAT----- mirR 23 1
-----GGGGCAGCTCAGTACAGGATG----- mirR 21 1
-----CGGGGCAGCTCAGTACAGGATGCG----- mirR 24 1
-----TCAGGGTGGGAGACAACG---- morR 18 1
-----TCAGGGTGGGAGACAACGGGA morR 22 1
```

>mmu-mir-3091

```
TGGCCGAGAGTGCTTGC CGGCCATGGGTCTGGTTGGGCCCGCAGACTCGGAGTGC GGGCCTGACCAGTCTCAAGACCTGCGTGTA ACTCTGCA species len reads
TGGCCGAGAGTGCTTGC G----- morL 18 1
-----CATGGGTCTGGTTGGGCCCGCA----- mirL 22 158
-----CATGGGTCTGGTTGGGCCCGCAGA----- mirL 24 105
-----CATGGGTCTGGTTGGGCCCGCAG----- mirL 23 104
-----CATGGGTCTGGTTGGGCCCGC----- mirL 21 49
-----CATGGGTCTGGTTGGGCCCGCAGAC----- mirL 25 38
-----CATGGGTCTGGTTGGGCCCGCAGACT----- mirL 26 6
-----CCATGGGTCTGGTTGGGCCCGCA----- mirL 23 4
-----CATGGGTCTGGTTGGGCCCG----- mirL 20 3
-----ATGGGTCTGGTTGGGCC----- mirL 18 2
-----CCATGGGTCTGGTTGGGCCCGCAGA----- mirL 25 1
-----GCCATGGGTCTGGTTGGGCCCGCAG----- mirL 25 1
-----GCCATGGGTCTGGTTGGG----- mirL 18 1
-----GGGTCTGGTTGGGCCCGCAG----- mirL 20 1
-----CGGGCCTGACCAGTCTCAAGAC----- mirR 22 167
-----CGGGCCTGACCAGTCTCAAGA----- mirR 21 57
-----CGGGCCTGACCAGTCTCAAGACC----- mirR 23 21
-----CGGGCCTGACCAGTCTCAAG----- mirR 20 6
-----CGGGCCTGACCAGTCTCA----- mirR 18 3
-----CGGGCCTGACCAGTCTCAAGACCT----- mirR 24 2
-----GCCTGACCAGTCTCAAGA----- mirR 18 1
-----GGGCCTGACCAGTCTCAAG----- mirR 19 1
-----GGCCTGACCAGTCTCAAGACCTGCGTGG----- mirR 28 1
-----CTGCGTGTA ACTCTGCA morR 18 1
```

>mmu-mir-717

```
ACTGTACCGTCATTTTTTCAGTCTCAGACAGAGATACCTTCTCTGAATTCATAGAAGCTGCTCTCCGTTCCGAAGGGATTCAGAAGTGATAAATCCAGCAACTATCTCAGTACCTCATTAGTGTCTGCAGGCCAGCA spec
ACTGTACCGTCATTTTTTC----- morL
ACTGTACCGTCATTTTTTCAGTC----- morL
ACTGTACCGTCATTTTTTCAG----- morL
ACTGTACCGTCATTTTTTCA----- morL
ACTGTACCGTCATTTTTTCAGTCT----- morL
-----CTCAGACAGAGATACCTTCTCT----- mirL
-----CTCAGACAGAGATACCTTCTC----- mirL
-----CTCAGACAGAGATACCTTCT----- mirL
-----CTCAGACAGAGATACCTTC----- mirL
-----CAGACAGAGATACCTTCT----- mirL
-----TCAGACAGAGATACCTTCTCT----- mirL
```

```

-----CTCAGACAGAGATACCTT----- mirL
-----CTCAGACAGAGATACCTTCTCTG----- mirL
-----GTCTCAGACAGAGATACC----- mirL
-----GCAACTATCTCAGTACCT----- mirR
-----AGCAACTATCTCAGTACCT----- mirR
-----TCATTAGTGTCTGCAGGC----- morR
-----CCTCATTAGTGTCTGCAGG----- morR
-----CATTAGTGTCTGCAGGCC----- morR
-----ATTAGTGTCTGCAGGCCA--- morR
-----TAGTGTCTGCAGGCCAGCA morR

```

>mmu-mir-1929

| Sequence                                                                                                 | Species | Len | Reads |
|----------------------------------------------------------------------------------------------------------|---------|-----|-------|
| TGATTAGAACTGGGAGGTCTTCTAGGACTTTATAGAGCAGAGGTTTGCAGCCTGTGACACTCAGCTCATGGAGACCTAGGTGGCCTTGGGTTCTGAGCACCAGA | morL    | 18  | 2     |
| ---TAGAACTGGGAGGTCTTC---                                                                                 | morL    | 18  | 1     |
| TGATTAGAACTGGGAGGT---                                                                                    | morL    | 18  | 1     |
| ---TTAGAACTGGGAGGTCTT---                                                                                 | morL    | 18  | 1     |
| -----TTCTAGGACTTTATAGAGCA-----                                                                           | mirL    | 20  | 366   |
| -----TTCTAGGACTTTATAGAGCAGA-----                                                                         | mirL    | 22  | 83    |
| -----TTCTAGGACTTTATAGAGC-----                                                                            | mirL    | 19  | 33    |
| -----TCTAGGACTTTATAGAGCA-----                                                                            | mirL    | 19  | 32    |
| -----TCTAGGACTTTATAGAGCAGA-----                                                                          | mirL    | 21  | 18    |
| -----TTCTAGGACTTTATAGAGCAGAG-----                                                                        | mirL    | 23  | 15    |
| -----TTCTAGGACTTTATAGAGCAG-----                                                                          | mirL    | 21  | 11    |
| -----CTAGGACTTTATAGAGCA-----                                                                             | mirL    | 18  | 10    |
| -----CTAGGACTTTATAGAGCAG-----                                                                            | mirL    | 19  | 10    |
| -----CTAGGACTTTATAGAGCAGA-----                                                                           | mirL    | 20  | 7     |
| -----TAGGACTTTATAGAGCAGA-----                                                                            | mirL    | 19  | 4     |
| -----TCTAGGACTTTATAGAGCAGAG-----                                                                         | mirL    | 23  | 3     |
| -----TAGGACTTTATAGAGCAGAG-----                                                                           | mirL    | 20  | 3     |
| -----TTCTAGGACTTTATAGAGCAGAG-----                                                                        | mirL    | 24  | 3     |
| -----TCTAGGACTTTATAGAGCAG-----                                                                           | mirL    | 20  | 2     |
| -----TAGGACTTTATAGAGCAG-----                                                                             | mirL    | 18  | 2     |
| -----TCTAGGACTTTATAGAGC-----                                                                             | mirL    | 18  | 2     |
| -----TTCTAGGACTTTATAGAG-----                                                                             | mirL    | 18  | 2     |
| -----TCTAGGACTTTATAGAGCAGAG-----                                                                         | mirL    | 22  | 1     |
| -----CTAGGACTTTATAGAGCAGAG-----                                                                          | mirL    | 21  | 1     |
| -----AGGTTTGCAGCCTGTGAC-----                                                                             | loop    | 18  | 2     |
| -----GTTTGCAGCCTGTGACAC-----                                                                             | loop    | 18  | 1     |
| -----GGTTTGCAGCCTGTGACACTCA-----                                                                         | loop    | 22  | 1     |
| -----CAGCTCATGGAGACCTAGGTGG-----                                                                         | mirR    | 22  | 42    |
| -----CAGCTCATGGAGACCTAGGTG-----                                                                          | mirR    | 21  | 27    |
| -----CAGCTCATGGAGACCTAGGTGGCC-----                                                                       | mirR    | 24  | 8     |
| -----CAGCTCATGGAGACCTAG-----                                                                             | mirR    | 18  | 3     |
| -----CAGCTCATGGAGACCTAGGTGGC-----                                                                        | mirR    | 23  | 3     |
| -----GCTCATGGAGACCTAGGT-----                                                                             | mirR    | 18  | 2     |
| -----CTCAGCTCATGGAGACCT-----                                                                             | mirR    | 18  | 2     |

```
-----ACTCAGCTCATGGAGACCT----- mirR 19 1
-----CAGCTCATGGAGACCTAGGT----- mirR 20 1
-----GCTCATGGAGACCTAGGTGGC----- mirR 21 1
-----AGCTCATGGAGACCTAGGT----- mirR 19 1
-----ACTCAGCTCATGGAGACC----- mirR 18 1
-----TGGGTTCTGAGCACCAGA----- morR 18 7
-----TGGCCTTGGGTTCTGAGC----- morR 18 2
-----TTGGGTTCTGAGCACCAG----- morR 18 1
-----CTTGGGTTCTGAGCACCAG----- morR 18 1
-----TTGGGTTCTGAGCACCAGA----- morR 19 1
-----GGCCTTGGGTTCTGAGCA----- morR 18 1
```

>mmu-mir-2136

```
GCTCAGGCATATCCGCGTATCCAGTCAGGAGTCAGTTAGGAAGTTTTAAGTCTGAATTAATTCTGGGTGTTGACTGAGATGTGGTGCCAGACCATTTTGT species len reads
GCTCAGGCATATCCGCGT----- morL 18 2
-CTCAGGCATATCCGCGTA----- morL 18 1
-----ATCCAGTCAGGAGTCAGT----- mirL 18 4
-----CCAGTCAGGAGTCAGTTA----- mirL 18 3
-----CTGGGTGTTGACTGAGATGTG----- mirR 21 225
-----CTGGGTGTTGACTGAGATG----- mirR 19 198
-----CTGGGTGTTGACTGAGATGT----- mirR 20 114
-----CTGGGTGTTGACTGAGAT----- mirR 18 39
-----TGGGTGTTGACTGAGATGTG----- mirR 20 22
-----TGGGTGTTGACTGAGATGT----- mirR 19 14
-----TGGGTGTTGACTGAGATG----- mirR 18 13
-----TCTGGGTGTTGACTGAGATG----- mirR 20 3
-----GGGTGTTGACTGAGATGTG----- mirR 19 3
-----CTGGGTGTTGACTGAGATGTG----- mirR 22 3
-----TCTGGGTGTTGACTGAGATGT----- mirR 21 2
-----GGTGTGACTGAGATGTG----- mirR 18 1
-----GGTGGGGACCAGACCATTT----- morR 19 14
-----TGGGGACCAGACCATTT----- morR 18 14
-----GGTGGGGACCAGACCATTT----- morR 20 9
-----GGTGGGGACCAGACCATT----- morR 18 8
-----TGGTGGGGACCAGACCAT----- morR 18 2
-----TGGTGGGGACCAGACCATT----- morR 19 1
-----GGGACCAGACCATTTTGT morR 18 1
-----GGGACCAGACCATTTTGT morR 19 1
```

>mmu-mir-703

```
AAAGTAAAAGACTGGTTAATGATAACAATGCATCATAAACCTTCAGAAGGAAAGAATGTTGTGGACCATTTTTTTTGTGTGGCAGTTTTAAGTTATTAGTTTTCAAAATCAGTACTTTTTAATGGAAACAACCTTGAC
---GTAAAAGACTGGTTAATGATAACAATGCATC-----
-----ACTGGTTAATGATAACAATGCAT-----
-----AGACTGGTTAATGATAACAATGCAT-----
-----CTGGTTAATGATAACAATGCAT-----
-----GACTGGTTAATGATAACAATGCAT-----
```

```
--AGTAAAAGACTGGTTAATGATAACAATGCATC-----  
-----GGTTAATGATAACAATGCATC-----  
-----GGTTAATGATAACAATGCAT-----  
AAAGTAAAAGACTGGTTAATGATAACAATGCATC-----  
-----GGTTAATGATAACAATGCATCA-----  
-----TAATGATAACAATGCATCA-----  
-----GTTAATGATAACAATGCATCA-----  
-----CTGGTTAATGATAACAATGCATCA-----  
-----GACTGGTTAATGATAACAATGCATCA-----  
-----AAAAGACTGGTTAATGATAACAATGCATCATA-----  
-----GGTTAATGATAACAATGCATCAT-----  
-----GACTGGTTAATGATAACAATGCAT-----  
-----AATGATAACAATGCATCATA-----  
-----AGACTGGTTAATGATAACAATGCAT-----  
-----TTAATGATAACAATGCATCATA-----  
-----AATGATAACAATGCATCAT-----  
-----AAAAGACTGGTTAATGATAACAATGCATCAT-----  
-----ATGATAACAATGCATCAT-----  
-----GGTTAATGATAACAATGCATCATAAA-----  
-----ACTGGTTAATGATAACAATGCATCA-----  
-----ATAACAATGCATCATAAA-----  
-----ATGATAACAATGCATCATA-----  
-----TGTTAATGATAACAATGCATCATA-----  
-----AAAAGACTGGTTAATGATAACAATGCATCA-----  
--AGTAAAAGACTGGTTAATGATAACAATGCAT-----  
-----AATGATAACAATGCATCATAAA-----  
--GTAAAAGACTGGTTAATGATAACAATGCATCAT-----  
-----GACTGGTTAATGATAACAATGCATCAT-----  
-----AAAACCTTCAGAAGGAAAGA-----  
-----AAAACCTTCAGAAGGAAAGAA-----  
-----CATAAAACCTTCAGAAGGAAAGAATG-----  
-----ATAAAACCTTCAGAAGGA-----  
-----AAAACCTTCAGAAGGAAAG-----  
-----ACCTTCAGAAGGAAAGAA-----  
-----AACCTTCAGAAGGAAAGA-----  
-----AAAACCTTCAGAAGGAAAGAATGT-----  
-----AACCTTCAGAAGGAAAGAA-----  
-----ATAAAACCTTCAGAAGGAA-----  
-----AACCTTCAGAAGGAAAGA-----  
-----ATAAAACCTTCAGAAGGAAAGAATGTTGTG-----  
-----AAAACCTTCAGAAGGAAAG-----  
-----AAAACCTTCAGAAGGAAA-----  
-----AAAACCTTCAGAAGGAAAGAATGTTGTG-----  
-----ATAAAACCTTCAGAAGGAAAGAATGTTGT-----  
-----AAAACCTTCAGAAGGAAAGAAT-----  
-----ACCTTCAGAAGGAAAGAAT-----
```

```
-----CATAAAACCTTCAGAAGGAAAGAATGTTGTG-----  
-----AACCTTCAGAAGGAAAGAAT-----  
-----TAAAACCTTCAGAAGGAAAGAATGTTGTG-----  
-----ATAAAACCTTCAGAAGGAAA-----  
-----TAAAACCTTCAGAAGGAAAGAATG-----  
-----ATAAAACCTTCAGAAGGAAAGAATGTT-----  
-----CATAAAACCTTCAGAAGGAAAGAATGTTGT-----  
-----ATAAAACCTTCAGAAGGAAAGAATG-----  
-----TAAAACCTTCAGAAGGAAA-----  
-----AAACCTTCAGAAGGAAAGAATGTTGTG-----  
-----GTTGTGGACCATTTTTTT-----  
-----GTTGTGGACCATTTTTTT-----  
-----AGAATGTTGTGGACCATTTTTTT-----  
-----TTGTGGACCATTTTTTT-----  
-----TTGTGGACCATTTTTTT-----  
-----GTGTGTGGCAGTTTTAAGTTATTAGTTTTCAA-----  
-----GTGTGTGGCAGTTTTAAGTTATTAGTTTTC-----  
-----GTGTGTGGCAGTTTTAAGTTATTAGTTTTCA-----  
-----TGTGTGTGGCAGTTTTAAGTTATTAGTTTTC-----  
-----GTGTGTGGCAGTTTTAAGTTATTAGTT-----  
-----TTGTGTGTGGCAGTTTTAAGTTATTAGTTTTCAA-----  
-----TTTGTGTGTGGCAGTTTTAAGTTATT-----  
-----TTTGTGTGTGGCAGTTTTAAGTTATTAGTTTTC-----  
-----TGTGTGTGGCAGTTTTAAGTTATTAGTT-----  
-----TGTGGCAGTTTTAAGTTATTAGTTTTCAAATC-----  
-----TTTGTGTGTGGCAGTTTTAAGTTATT-----  
-----TGTGTGTGGCAGTTTTAAGTTATTAGT-----  
-----GTGTGTGGCAGTTTTAAGTTATTAGTTTTCAA-----  
-----GTGTGTGGCAGTTTTAAGTTATTAGTTTTCAA-----  
-----TGTGTGTGGCAGTTTTAAGTTATTAGTTTTCA-----  
-----TGTGTGGCAGTTTTAAGTTATTAGTTTTCAAATC-----  
-----GTGTGTGGCAGTTTTAAGTTATTAGTTTTCAA-----  
-----GTGTGTGGCAGTTTTAAGTTATTAGTT-----  
-----GTGTGGCAGTTTTAAGTTATTAGT-----  
-----TTTGTGTGTGGCAGTTTTAAGTTATTAGTTTTC-----  
-----TTTGTGTGTGGCAGTTTTAAGTTA-----  
-----TTTGTGTGTGGCAGTTTTAAGTTATTAGTT-----  
-----GTGTGGCAGTTTTAAGTT-----  
-----TGTGTGTGGCAGTTTTAAGTTATTAGTTTTCAA-----  
-----TGTGTGTGGCAGTTTTAAGTTATTA-----  
-----TGTGTGGCAGTTTTAAGTTATTAGTTTTCAAAT-----  
-----TGTGTGGCAGTTTTAAGTTATTAGTTTTCA-----  
-----TGTGTGGCAGTTTTAAGTTATTAGTT-----  
-----TGTGTGTGGCAGTTTTAAGTTATT-----  
-----TTTGTGTGTGGCAGTTTTAAGTTATTAG-----
```



```

-----TTGTGTGTGGCAGTTTTAAGT-----
-----TTGTGTGTGGCAGTTTTAAGTTATTAGTTTT-----
-----AGTACTTTTTAATGGAAACAAC-----
-----ATCAGTACTTTTTAATGGAAACAACCTTGAC-----
-----AGTACTTTTTAATGGAAA-----
-----ATCAGTACTTTTTAATGGAAACAACCTTG-----
-----AGTACTTTTTAATGGAAAC-----
-----ATCAGTACTTTTTAATGGA-----

```

>mmu-mir-881

| Sequence                                                                                        | species | len | reads |
|-------------------------------------------------------------------------------------------------|---------|-----|-------|
| TTGTGTGCAGTACAATATTCAGAGAGATAACAGTCACATCTTTTCTAAAGTAACTGTGTCTTTTCTGAATAGAGTAATGTTCCACCAAAAAACAG | morL    | 21  | 1     |
| TTGTGTGCAGTACAATATTC                                                                            | morL    | 18  | 1     |
| -TGTGTGCAGTACAATATT                                                                             | morL    | 18  | 1     |
| --GTGTGCAGTACAATATTC                                                                            | mirL    | 22  | 202   |
| -----CAGAGAGATAACAGTCACATCT-----                                                                | mirL    | 21  | 165   |
| -----CAGAGAGATAACAGTCACATC-----                                                                 | mirL    | 20  | 34    |
| -----CAGAGAGATAACAGTCACAT-----                                                                  | mirL    | 18  | 14    |
| -----TCAGAGAGATAACAGTCA-----                                                                    | mirL    | 22  | 13    |
| -----TCAGAGAGATAACAGTCACATC-----                                                                | mirL    | 19  | 11    |
| -----AGAGATAACAGTCACATCT-----                                                                   | mirL    | 19  | 8     |
| -----CAGAGAGATAACAGTCACA-----                                                                   | mirL    | 18  | 8     |
| -----CAGAGAGATAACAGTCAC-----                                                                    | mirL    | 18  | 4     |
| -----ATTCAGAGAGATAACAGT-----                                                                    | mirL    | 18  | 2     |
| -----TTCAGAGAGATAACAGTC-----                                                                    | mirL    | 19  | 2     |
| -----TCAGAGAGATAACAGTCAC-----                                                                   | mirL    | 19  | 2     |
| -----ATTCAGAGAGATAACAGTC-----                                                                   | mirL    | 18  | 2     |
| -----AGAGAGATAACAGTCACA-----                                                                    | mirL    | 23  | 1     |
| -----ATTCAGAGAGATAACAGTCACAT-----                                                               | mirL    | 19  | 1     |
| -----TTCAGAGAGATAACAGTCA-----                                                                   | mirR    | 20  | 55    |
| -----AACTGTGTCTTTTCTGAATA-----                                                                  | mirR    | 21  | 42    |
| -----AACTGTGTCTTTTCTGAATAG-----                                                                 | mirR    | 22  | 17    |
| -----AACTGTGTCTTTTCTGAATAGA-----                                                                | mirR    | 19  | 7     |
| -----ACTGTGTCTTTTCTGAATA-----                                                                   | mirR    | 19  | 4     |
| -----AACTGTGTCTTTTCTGAAT-----                                                                   | mirR    | 18  | 4     |
| -----AACTGTGTCTTTTCTGAA-----                                                                    | mirR    | 18  | 1     |
| -----GTAAGTGTGTCTTTTCTG-----                                                                    | morR    | 18  | 14    |
| -----AGAGTAATGTTCCACCAAA-----                                                                   | morR    | 18  | 6     |
| -----TAATGTTCCACCAAAAAACA-----                                                                  | morR    | 19  | 3     |
| -----GTAATGTTCCACCAAAAAACA-----                                                                 | morR    | 18  | 3     |
| -----ATAGAGTAATGTTCCACCA-----                                                                   | morR    | 18  | 3     |
| -----GTAATGTTCCACCAAAAAAC-----                                                                  | morR    | 20  | 1     |
| -----TAGAGTAATGTTCCACCAAAAA-----                                                                | morR    | 19  | 1     |
| -----TAATGTTCCACCAAAAAACAG-----                                                                 | morR    | 20  | 1     |
| -----GAGTAATGTTCCACCAAAAAAC-----                                                                | morR    | 20  | 1     |

>mmu-mir-883a

|                                                                                                     | species | len | reads |
|-----------------------------------------------------------------------------------------------------|---------|-----|-------|
| TAATAATAATTCGTGTGCACTATAATGCTGAGAGAAGTAGCAGTTACTTTATTCTATAAGTAACTGCAACAGCTCTCAGTATTGTAAGGCTCAACAAAC | morL    | 22  | 1     |
| TAATAATAATTCGTGTGCACTA-----TGCTGAGAGAAGTAGCAGTTAC-----                                              | mirL    | 22  | 157   |
| -----TGCTGAGAGAAGTAGCAGTTA-----                                                                     | mirL    | 21  | 39    |
| -----CTGAGAGAAGTAGCAGTTAC-----                                                                      | mirL    | 20  | 5     |
| -----GCTGAGAGAAGTAGCAGTTA-----                                                                      | mirL    | 20  | 4     |
| -----GCTGAGAGAAGTAGCAGTTAC-----                                                                     | mirL    | 21  | 3     |
| -----TGAGAGAAGTAGCAGTTAC-----                                                                       | mirL    | 19  | 3     |
| -----TGCTGAGAGAAGTAGCAGTT-----                                                                      | mirL    | 20  | 3     |
| -----TGCTGAGAGAAGTAGCAG-----                                                                        | mirL    | 18  | 2     |
| -----TGAGAGAAGTAGCAGTTA-----                                                                        | mirL    | 18  | 1     |
| -----GCTGAGAGAAGTAGCAGT-----                                                                        | mirL    | 18  | 1     |
| -----TAATGCTGAGAGAAGTAG-----                                                                        | mirL    | 18  | 1     |
| -----AATGCTGAGAGAAGTAGCA-----                                                                       | mirL    | 19  | 1     |
| -----ATGCTGAGAGAAGTAGCAGTTAC-----                                                                   | mirL    | 23  | 1     |
| -----TAACTGCAACAGCTCTCAGTAT-----                                                                    | mirR    | 22  | 276   |
| -----TAACTGCAACAGCTCTCAGTA-----                                                                     | mirR    | 21  | 60    |
| -----AACTGCAACAGCTCTCAGTATT-----                                                                    | mirR    | 22  | 13    |
| -----AACTGCAACAGCTCTCAGTAT-----                                                                     | mirR    | 21  | 10    |
| -----TAACTGCAACAGCTCTCAGT-----                                                                      | mirR    | 20  | 9     |
| -----TAACTGCAACAGCTCTCAGTATTG-----                                                                  | mirR    | 24  | 8     |
| -----CTGCAACAGCTCTCAGTAT-----                                                                       | mirR    | 19  | 6     |
| -----AACTGCAACAGCTCTCAGTATTG-----                                                                   | mirR    | 23  | 5     |
| -----ACTGCAACAGCTCTCAGTAT-----                                                                      | mirR    | 20  | 4     |
| -----TAACTGCAACAGCTCTCAGTATT-----                                                                   | mirR    | 23  | 3     |
| -----TAACTGCAACAGCTCTCAG-----                                                                       | mirR    | 19  | 3     |
| -----ACTGCAACAGCTCTCAGTA-----                                                                       | mirR    | 19  | 1     |
| -----AACTGCAACAGCTCTCAG-----                                                                        | mirR    | 18  | 1     |
| -----ATTGTAAGGCTCAACAAAC-----                                                                       | morR    | 18  | 5     |
| -----TTGTAAGGCTCAACAAAC-----                                                                        | morR    | 18  | 3     |

>mmu-mir-3084

|                                                | species | len | reads |
|------------------------------------------------|---------|-----|-------|
| AGTTGAAGGTTAATTAGCAGAGTAACTGAATATAGTAATTCTGCCA |         |     |       |
| -GTTGAAGGTTAATTAGCAGAGT-----                   | mirR    | 22  | 409   |
| -GTTGAAGGTTAATTAGCAGAG-----                    | mirR    | 21  | 35    |
| --TTGAAGGTTAATTAGCAGAGTA-----                  | mirR    | 22  | 32    |
| AGTTGAAGGTTAATTAGCAGAGT-----                   | mirR    | 23  | 27    |
| --TTGAAGGTTAATTAGCAGAGT-----                   | mirR    | 21  | 23    |
| --TTGAAGGTTAATTAGCAGAGTAA-----                 | mirR    | 23  | 22    |
| -GTTGAAGGTTAATTAGCAGAGTA-----                  | mirR    | 23  | 20    |
| ---GAAGGTTAATTAGCAGAGT-----                    | mirR    | 19  | 15    |
| --TTGAAGGTTAATTAGCAGAG-----                    | mirR    | 20  | 7     |
| -GTTGAAGGTTAATTAGCAGA-----                     | mirR    | 20  | 6     |
| AGTTGAAGGTTAATTAGCAGAG-----                    | mirR    | 22  | 4     |
| AGTTGAAGGTTAATTAGCAGAGTA-----                  | mirR    | 24  | 4     |
| -GTTGAAGGTTAATTAGCAGAGTAA-----                 | mirR    | 24  | 3     |

```
-GTTGAAGGTTAATTAGCA----- mirR 18 3
---TGAAGGTTAATTAGCAGAGTA----- mirR 21 3
---TGAAGGTTAATTAGCAGAGTAA----- mirR 22 1
AGTTGAAGGTTAATTAGCAGA----- mirR 21 1
-----TGAATATAGTAATTCTGCCA morR 20 1
```

>mmu-mir-471

```
AAGAATATGTGAGCAGTGCTTTACGTAGTATAGTGCTTTTCACATTAACAAAAAGTGAAAGGTGCCATACTATGTATAGGAAGGCTTACCATGTT species len reads
-----TATTGTGAGCAGTGCTTT----- morL 18 1
AAGAATATGTGAGCAGTG----- morL 19 1
-----TACGTAGTATAGTGCTTTTCA----- mirL 21 170
-----TACGTAGTATAGTGCTTTTCACA----- mirL 23 97
-----TACGTAGTATAGTGCTTTTC----- mirL 20 64
-----TACGTAGTATAGTGCTTTT----- mirL 19 59
-----TACGTAGTATAGTGCTTTTCAC----- mirL 22 48
-----ACGTAGTATAGTGCTTTTCACA----- mirL 22 35
-----ACGTAGTATAGTGCTTTTCA----- mirL 20 29
-----CGTAGTATAGTGCTTTTCACA----- mirL 21 26
-----CGTAGTATAGTGCTTTTCA----- mirL 19 16
-----GTAGTATAGTGCTTTTCACA----- mirL 20 14
-----GTAGTATAGTGCTTTTCA----- mirL 18 7
-----ACGTAGTATAGTGCTTTT----- mirL 18 5
-----TACGTAGTATAGTGCTTT----- mirL 18 4
-----CGTAGTATAGTGCTTTTCAC----- mirL 20 3
-----ACGTAGTATAGTGCTTTTCAC----- mirL 21 1
-----TTACGTAGTATAGTGCTTTTCACA----- mirL 24 1
-----ATTAAACAAAAAGTGAAA----- loop 18 2
-----TAAACAAAAAGTGAAAGGT----- loop 19 1
-----CACATTAACAAAAAGTGAA----- loop 20 1
-----GGTGCCATACTATGTATA----- mirR 18 22
-----GGTGCCATACTATGTATAG----- mirR 19 1
-----GCCATACTATGTATAGGA----- mirR 18 1
-----AGGAAGGCTTACCATGTT morR 18 2
-----TAGGAAGGCTTACCATGT morR 18 1
-----ATAGGAAGGCTTACCATG-- morR 18 1
```

>mmu-mir-467d

```
ATAAGTGCGCGCATGTATATGCGTG species len reads
ATAAGTGCGCGCATGTATATGC--- mirL 22 242
-TAAGTGCGCGCATGTATATGC--- mirL 21 102
-TAAGTGCGCGCATGTATATGCGT- mirL 23 59
ATAAGTGCGCGCATGTATATG---- mirL 21 35
ATAAGTGCGCGCATGTATAT----- mirL 20 31
-TAAGTGCGCGCATGTATATGCGTG mirL 24 29
-TAAGTGCGCGCATGTATATGCG-- mirL 22 24
-TAAGTGCGCGCATGTATAT----- mirL 19 20
```

```

ATAAGTGC GCGCATGTATATGCG-- mirL 23 14
-TAAGTGC GCGCATGTATATG---- mirL 20 10
--AAGTGC GCGCATGTATATGC--- mirL 20 10
-TAAGTGC GCGCATGTATA----- mirL 18 6
--AAGTGC GCGCATGTATATG---- mirL 19 6
--AAGTGC GCGCATGTATATGCG-- mirL 21 3
ATAAGTGC GCGCATGTATATGCGT- mirL 24 3
--AAGTGC GCGCATGTATATGCGT- mirL 22 3
ATAAGTGC GCGCATGTATA----- mirL 19 2
---AGTGC GCGCATGTATATGCGTG mirL 22 2
ATAAGTGC GCGCATGTATATGCGTG mirL 25 2
--AAGTGC GCGCATGTATAT----- mirL 18 1

```

>mmu-mir-3076

```

GGGGCCATTGGAGTTCTGTTCTAACACAGGGGAAGCTCAGTGCCAGCCTTTCTCTTAGCCGCACTCTGGTCTTCCCTTG CAGATAAGATCAGCATCCGG species len reads
---GCCATTGGAGTTCTGTTCTAACACAGGGGAAGCTCAGTGCCAGCCTTTCTCTTAGCCGCACTCTGGTCTTCCCTTG CAGATAAGATCAGCATCCGG morL 18 2
-----ATTGGAGTTCTGTTCTAACACAGGGGAAGCTCAGTGCCAGCCTTTCTCTTAGCCGCACTCTGGTCTTCCCTTG CAGATAAGATCAGCATCCGG morL 19 1
GGGGCCATTGGAGTTCTGTTCTAACACAGGGGAAGCTCAGTGCCAGCCTTTCTCTTAGCCGCACTCTGGTCTTCCCTTG CAGATAAGATCAGCATCCGG morL 20 1
-----ACACAGGGGAAGCTCAGTGCCAGCCTTTCTCTTAGCCGCACTCTGGTCTTCCCTTG CAGATAAGATCAGCATCCGG mirL 24 25
-----ACAGGGGAAGCTCAGTGCCAGCCTTTCTCTTAGCCGCACTCTGGTCTTCCCTTG CAGATAAGATCAGCATCCGG mirL 20 11
-----ACAGGGGAAGCTCAGTGCCAGCCTTTCTCTTAGCCGCACTCTGGTCTTCCCTTG CAGATAAGATCAGCATCCGG mirL 21 9
-----CACAGGGGAAGCTCAGTGCCAGCCTTTCTCTTAGCCGCACTCTGGTCTTCCCTTG CAGATAAGATCAGCATCCGG mirL 26 8
-----ACACAGGGGAAGCTCAGTGCCAGCCTTTCTCTTAGCCGCACTCTGGTCTTCCCTTG CAGATAAGATCAGCATCCGG mirL 26 7
-----ACAGGGGAAGCTCAGTGCCAGCCTTTCTCTTAGCCGCACTCTGGTCTTCCCTTG CAGATAAGATCAGCATCCGG mirL 22 6
-----CACAGGGGAAGCTCAGTGCCAGCCTTTCTCTTAGCCGCACTCTGGTCTTCCCTTG CAGATAAGATCAGCATCCGG mirL 22 5
-----CACAGGGGAAGCTCAGTGCCAGCCTTTCTCTTAGCCGCACTCTGGTCTTCCCTTG CAGATAAGATCAGCATCCGG mirL 25 4
-----ACAGGGGAAGCTCAGTGCCAGCCTTTCTCTTAGCCGCACTCTGGTCTTCCCTTG CAGATAAGATCAGCATCCGG mirL 23 4
-----ACACAGGGGAAGCTCAGTGCCAGCCTTTCTCTTAGCCGCACTCTGGTCTTCCCTTG CAGATAAGATCAGCATCCGG mirL 23 3
-----ACACAGGGGAAGCTCAGTGCCAGCCTTTCTCTTAGCCGCACTCTGGTCTTCCCTTG CAGATAAGATCAGCATCCGG mirL 25 3
-----AACACAGGGGAAGCTCAGTGCCAGCCTTTCTCTTAGCCGCACTCTGGTCTTCCCTTG CAGATAAGATCAGCATCCGG mirL 18 3
-----CTAACACAGGGGAAGCTCAGTGCCAGCCTTTCTCTTAGCCGCACTCTGGTCTTCCCTTG CAGATAAGATCAGCATCCGG mirL 18 2
-----CACAGGGGAAGCTCAGTGCCAGCCTTTCTCTTAGCCGCACTCTGGTCTTCCCTTG CAGATAAGATCAGCATCCGG mirL 21 2
-----ACACAGGGGAAGCTCAGTGCCAGCCTTTCTCTTAGCCGCACTCTGGTCTTCCCTTG CAGATAAGATCAGCATCCGG mirL 18 2
-----CAGGGGAAGCTCAGTGCCAGCCTTTCTCTTAGCCGCACTCTGGTCTTCCCTTG CAGATAAGATCAGCATCCGG mirL 21 2
-----CACAGGGGAAGCTCAGTGCCAGCCTTTCTCTTAGCCGCACTCTGGTCTTCCCTTG CAGATAAGATCAGCATCCGG mirL 23 2
-----AACACAGGGGAAGCTCAGTGCCAGCCTTTCTCTTAGCCGCACTCTGGTCTTCCCTTG CAGATAAGATCAGCATCCGG mirL 25 2
-----ACACAGGGGAAGCTCAGTGCCAGCCTTTCTCTTAGCCGCACTCTGGTCTTCCCTTG CAGATAAGATCAGCATCCGG mirL 28 1
-----CAGGGGAAGCTCAGTGCCAGCCTTTCTCTTAGCCGCACTCTGGTCTTCCCTTG CAGATAAGATCAGCATCCGG mirL 23 1
-----ACAGGGGAAGCTCAGTGCCAGCCTTTCTCTTAGCCGCACTCTGGTCTTCCCTTG CAGATAAGATCAGCATCCGG mirL 24 1
-----CACAGGGGAAGCTCAGTGCCAGCCTTTCTCTTAGCCGCACTCTGGTCTTCCCTTG CAGATAAGATCAGCATCCGG mirL 24 1
-----CAGGGGAAGCTCAGTGCCAGCCTTTCTCTTAGCCGCACTCTGGTCTTCCCTTG CAGATAAGATCAGCATCCGG mirL 22 1
-----AACACAGGGGAAGCTCAGTGCCAGCCTTTCTCTTAGCCGCACTCTGGTCTTCCCTTG CAGATAAGATCAGCATCCGG mirL 26 1
-----CACAGGGGAAGCTCAGTGCCAGCCTTTCTCTTAGCCGCACTCTGGTCTTCCCTTG CAGATAAGATCAGCATCCGG mirL 19 1
-----AGCCTTTCTCTTAGCCGCACTCTGGTCTTCCCTTG CAGATAAGATCAGCATCCGG loop 18 1
-----CGCACTCTGGTCTTCCCTTG CAGATAAGATCAGCATCCGG mirR 23 106
-----CGCACTCTGGTCTTCCCTTG CAGATAAGATCAGCATCCGG mirR 24 73

```

```

-----CCGCACTCTGGTCTTCCCTTGCAG----- mirR 24 52
-----CGCACTCTGGTCTTCCCTTGCAG----- mirR 22 52
-----CCGCACTCTGGTCTTCCCTTGCAG----- mirR 25 47
-----CCGCACTCTGGTCTTCCCTTGCAG----- mirR 23 34
-----CACTCTGGTCTTCCCTTGCAG----- mirR 22 29
-----CGCACTCTGGTCTTCCCTTGCAGATA----- mirR 26 24
-----CCGCACTCTGGTCTTCCCTTGC----- mirR 22 23
-----CACTCTGGTCTTCCCTTGCAGAT----- mirR 23 14
-----CACTCTGGTCTTCCCTTGCAG----- mirR 21 8
-----CGCACTCTGGTCTTCCCTTGC----- mirR 20 5
-----CGCACTCTGGTCTTCCCTTGCAGAT----- mirR 25 4
-----CCGCACTCTGGTCTTCCCTTGCAGATA----- mirR 28 4
-----CCGCACTCTGGTCTTCCCT----- mirR 19 3
-----CCGCACTCTGGTCTTCCCT----- mirR 20 2
-----CGCACTCTGGTCTTCCCT----- mirR 18 2
-----AGCCGCACTCTGGTCTTC----- mirR 18 1
-----CACTCTGGTCTTCCCTTGC----- mirR 19 1
-----GCCGCACTCTGGTCTTCCC----- mirR 19 1
-----GCACTCTGGTCTTCCCT----- mirR 18 1
-----CAGATAAGATCAGCATCC-- morR 18 2
-----GATAAGATCAGCATCCGG morR 18 1

```

>mmu-mir-1968

| CTGTCAGGGCCACCTCCTCTGCAGCTGTTAAGGATGGTGGACTATTGTTAGGGCCACCACCTCTGCAGCTGTTAAGGAGGGTGCTCCCTACTTC | species | len | reads |
|------------------------------------------------------------------------------------------------|---------|-----|-------|
| CTGTCAGGGCCACCTCCTC                                                                            | morL    | 19  | 2     |
| --GTCAGGGCCACCTCCTCT                                                                           | morL    | 18  | 1     |
| -TGTCAGGGCCACCTCCTCT                                                                           | morL    | 19  | 1     |
| ---TCAGGGCCACCTCCTCTG                                                                          | morL    | 18  | 1     |
| -----TGCAGCTGTTAAGGATGGTGGAC-----                                                              | mirL    | 23  | 92    |
| -----TGCAGCTGTTAAGGATGGTGGAG-----                                                              | mirL    | 22  | 78    |
| -----TGCAGCTGTTAAGGATGGTGGACT-----                                                             | mirL    | 24  | 76    |
| -----TGCAGCTGTTAAGGATGGTGGACTA-----                                                            | mirL    | 25  | 40    |
| -----TCTGCAGCTGTTAAGGATGGTGGAG-----                                                            | mirL    | 24  | 34    |
| -----CTGCAGCTGTTAAGGATGGTGGAG-----                                                             | mirL    | 23  | 27    |
| -----TCTGCAGCTGTTAAGGATGGTGG-----                                                              | mirL    | 23  | 20    |
| -----TGCAGCTGTTAAGGATGGTGGACTAT-----                                                           | mirL    | 26  | 19    |
| -----TCTGCAGCTGTTAAGGATGGTGG-----                                                              | mirL    | 22  | 17    |
| -----TGCAGCTGTTAAGGATGGTGG-----                                                                | mirL    | 21  | 15    |
| -----CTGCAGCTGTTAAGGATGGTGGAC-----                                                             | mirL    | 24  | 9     |
| -----TGCAGCTGTTAAGGATGGT-----                                                                  | mirL    | 19  | 9     |
| -----CTGCAGCTGTTAAGGATGGTGG-----                                                               | mirL    | 21  | 6     |
| -----GCAGCTGTTAAGGATGGTGGACT-----                                                              | mirL    | 23  | 6     |
| -----CTGCAGCTGTTAAGGATGGTGG-----                                                               | mirL    | 22  | 5     |
| -----GCAGCTGTTAAGGATGGTGGACTA-----                                                             | mirL    | 24  | 3     |
| -----TCTGCAGCTGTTAAGGATGGT-----                                                                | mirL    | 21  | 3     |
| -----TCTGCAGCTGTTAAGGATGGTGGAC-----                                                            | mirL    | 25  | 3     |

```

-----CTGCAGCTGTTAAGGATGGTGGACT----- mirL 25 3
-----TCTGCAGCTGTTAAGGATGG----- mirL 20 2
-----GCAGCTGTTAAGGATGGTGGAC----- mirL 22 2
-----CTGCAGCTGTTAAGGATGG----- mirL 19 2
-----AGCTGTTAAGGATGGTGGA----- mirL 19 1
-----CTGCAGCTGTTAAGGATGGTGGACTA----- mirL 26 1
-----GCAGCTGTTAAGGATGGTGGG----- mirL 21 1
-----GCAGCTGTTAAGGATGGTGGACTAT----- mirL 25 1
-----TCTGCAGCTGTTAAGGATG----- mirL 19 1
-----CCACCACCTCTGCAGCTGTTA----- mirR 21 35
-----CCACCACCTCTGCAGCTGTTAA----- mirR 22 28
-----CCACCACCTCTGCAGCTGTTAAG----- mirR 23 12
-----ACCACCTCTGCAGCTGTTAAGG----- mirR 22 12
-----ACCACCTCTGCAGCTGTTA----- mirR 19 5
-----ACCACCTCTGCAGCTGTTAAG----- mirR 21 5
-----CCACCACCTCTGCAGCTGTT----- mirR 20 3
-----ACCACCTCTGCAGCTGTTAA----- mirR 20 2
-----GGGCCACCACCTCTGCAG----- mirR 18 1
-----CACCACCTCTGCAGCTGT----- mirR 18 1
-----CACCACCTCTGCAGCTGTTAAG----- mirR 22 1
-----ACCACCTCTGCAGCTGTTAAGGGGGT----- mirR 27 1
-----GGGCCACCACCTCTGCAGC----- mirR 19 1
-----CACCACCTCTGCAGCTGTTAAGG----- mirR 23 1
-----CCACCACCTCTGCAGCTG----- mirR 18 1
-----CCACCTCTGCAGCTGTTAAGG----- mirR 21 1
-----ACCACCTCTGCAGCTGTT----- mirR 18 1
-----CACCACCTCTGCAGCTGTTA----- mirR 20 1
-----GAGGGTGCTCCCTACTTC morR 18 4

```

>mmu-mir-490

```

GGAAAGTTCATTGTTTCGACACCATGGATCTCCAGGTGGGTCACGTTTAGATATACACCAACCTGGAGGACTCCATGCTGTTGAGCTGTTTACAAGCAGCG species len reads
-----GTTTCATTGTTTCGACACCA----- morL 18 2
-----AAGTTCATTGTTTCGACAC----- morL 18 1
-----AGTTCATTGTTTCGACACC----- morL 18 1
GGAAAGTTCATTGTTTCGACACC----- morL 22 1
-----CCATGGATCTCCAGGTGGGT----- mirL 20 209
-----CCATGGATCTCCAGGTGGG----- mirL 19 65
-----CCATGGATCTCCAGGTGGGTCA----- mirL 22 29
-----CCATGGATCTCCAGGTGG----- mirL 18 21
-----CACCATGGATCTCCAGGT----- mirL 18 10
-----CATGGATCTCCAGGTGGGT----- mirL 19 3
-----ACCATGGATCTCCAGGTGG----- mirL 19 1
-----TGGATCTCCAGGTGGGTC----- mirL 18 1
-----CCATGGATCTCCAGGTGGGTCAC----- mirL 23 1
-----CCATGGATCTCCAGGTGGGTCACGT----- mirL 25 1
-----TCACGTTTAGATATACACC----- loop 19 38

```

```
-----TCACGTTTAGATATACAC----- loop 18 14
-----TCACGTTTAGATATACACCA----- loop 20 5
-----TCACGTTTAGATATACACCAA----- loop 21 2
-----ACGTTTAGATATACACCA----- loop 18 1
-----CACGTTTAGATATACACCAA----- loop 20 1
-----CAACCTGGAGGACTCCATGCT----- mirR 21 39
-----CAACCTGGAGGACTCCATGCTG----- mirR 22 33
-----CAACCTGGAGGACTCCATG----- mirR 19 32
-----CAACCTGGAGGACTCCATGC----- mirR 20 27
-----CAACCTGGAGGACTCCAT----- mirR 18 14
-----CAACCTGGAGGACTCCATGCTGT----- mirR 23 11
-----ACCTGGAGGACTCCATGCTG----- mirR 20 2
-----AACCTGGAGGACTCCATG----- mirR 18 2
-----CCAACCTGGAGGACTCCATGCTG----- mirR 23 2
-----ACCTGGAGGACTCCATGC----- mirR 18 1
-----ACCAACCTGGAGGACTCC----- mirR 18 1
-----ACCAACCTGGAGGACTCCA----- mirR 19 1
-----CCTGGAGGACTCCATGCT----- mirR 18 1
-----AACCTGGAGGACTCCATGCT----- mirR 20 1
-----AACCTGGAGGACTCCATGCTG----- mirR 21 1
-----CAACCTGGAGGACTCCATGCTGTT----- mirR 24 1
-----CCAACCTGGAGGACTCCATGCTGT----- mirR 24 1
-----ACCTGGAGGACTCCATGCTGTT----- mirR 22 1
-----GTTGAGCTGTTTCAACAAGC---- morR 18 3
-----TGAGCTGTTTCAACAAGCAGC- morR 19 1
-----GTTGAGCTGTTTCAACAAGCAG-- morR 20 1
-----GTTGAGCTGTTTCAACAAGCA-- morR 19 1
-----GAGCTGTTTCAACAAGCAGCG morR 19 1
-----CTGTTGAGCTGTTTCAACA----- morR 18 1

>mmu-mir-680-1
AATTATACAAGAAGTAAGAAGTGGGCATCTGCTGACATGGGGGCCGAAGTCAGGCGCCAGGAAGCGGGCACTTTGCATCTTATCTCCGGAACATCGATCCTCTTGACAGCCTTGGGTGTCAGGCTGGGCTCACTTGTGAC
-----TACAAGAAGTAAGAAGTGG-----
-----AAAGAAGTAAGAAGTGGG-----
-----ACAAGAAGTAAGAAGTGG-----
-----TACAAGAAGTAAGAAGTGG-----
-----TACAAGAAGTAAGAA-----
-----TACAAGAAGTAAGAAGTGG-----
-----ACAAGAAGTAAGAAGTGG-----
AATTATACAAGAAGTAAGAA-----GGGCATCTGCTGACATGGGG-----
-----GGGCATCTGCTGACATGGGG-----
-----GCATCTGCTGACATGGGG-----
-----GGCATCTGCTGACATGGGG-----
-----GGGCATCTGCTGACATGGG-----
-----GGGCATCTGCTGACATGGGGC-----
```

```
-----GGGCATCTGCTGACATGGGGGCC-----  
-----GGGCATCTGCTGACATGG-----  
-----CATCTGCTGACATGGGGG-----  
-----GTGGGCATCTGCTGACAT-----  
-----GTGGGCATCTGCTGACATGG-----  
-----  
-----ACTTGTGAC  
-----ACTTGTGAC  
-----CACTTGTGAC  
-----TTGTGAC  
-----  
-----
```

>mmu-mir-509

```
TGTGATAACTGTGTGGTTCTTTACTCCAGAATGTGGCAATCATGCATAAATTAATGTGATTGACATTTCTGTAATGGAGTAACACATGTGATATAT species len reads  
-----ATAACTGTGTGGTTCT----- morL 18 2  
-----AACTGTGTGGTTCTTT----- morL 18 2  
TGTGATAACTGTGTGGTTC----- morL 21 1  
-----ATAACTGTGTGGTTCTT----- morL 19 1  
-----CTGTGTGGTTCTTTAC----- morL 18 1  
-----TACTCCAGAATGTGGCAATCAT----- mirL 22 336  
-----TACTCCAGAATGTGGCAATCA----- mirL 21 106  
-----TACTCCAGAATGTGGCAATC----- mirL 20 21  
-----TCCAGAATGTGGCAATCAT----- mirL 19 11  
-----CTCCAGAATGTGGCAATCAT----- mirL 20 10  
-----ACTCCAGAATGTGGCAATCAT----- mirL 21 8  
-----ACTCCAGAATGTGGCAAT----- mirL 18 5  
-----CTCCAGAATGTGGCAATC----- mirL 18 1  
-----ACTCCAGAATGTGGCAATC----- mirL 19 1  
-----TACTCCAGAATGTGGCAA----- mirL 18 1  
-----TGATTGACATTTCTGTAA----- mirR 18 12  
-----ATGTGATTGACATTTCTGTA----- mirR 20 11  
-----TGATTGACATTTCTGTAATG----- mirR 20 10  
-----ATGTGATTGACATTTCTG----- mirR 18 8  
-----TGATTGACATTTCTGTAAT----- mirR 19 5  
-----ATGTGATTGACATTTCTGT----- mirR 19 3  
-----ATGTGATTGACATTTCTGTAA----- mirR 21 2  
-----TGTGATTGACATTTCTGTA----- mirR 19 1  
-----GTGATTGACATTTCTGTAA----- mirR 19 1  
-----TGATTGACATTTCTGTAATGG----- mirR 21 1  
-----GTGATTGACATTTCTGTA----- mirR 18 1  
-----TGGAGTAACACATGTGATATAT morR 22 1  
-----AGTAACACATGTGATATA----- morR 18 1  
-----GAGTAACACATGTGATATA----- morR 19 1
```

>mmu-mir-1945



|                                                                                                   | species | len | reads |
|---------------------------------------------------------------------------------------------------|---------|-----|-------|
| GACGCTTGAGCGCTGAACTCCGACTCCCGTCAGCCCCGAGAAAACCGCACCGGGTCTTCGCGGGTACTGTCGGGACTTGTAGTTTAGCTATCGGCCG | morL    | 18  | 2     |
| GACGCTTGAGCGCTGAAC-----                                                                           | mirL    | 18  | 11    |
| -----ACTCCGACTCCCGTCAGC-----                                                                      | mirL    | 18  | 1     |
| -----CTCCGACTCCCGTCAGCC-----                                                                      | loop    | 18  | 1     |
| -----CCCGAGAAAACCGCACCG-----                                                                      | loop    | 19  | 1     |
| -----CCCGAGAAAACCGCACCG-----                                                                      | loop    | 18  | 1     |
| -----TCTTCGCGGGTACTGTCGGGAC-----                                                                  | mirR    | 22  | 325   |
| -----TCTTCGCGGGTACTGTCGGGA-----                                                                   | mirR    | 21  | 70    |
| -----TCTTCGCGGGTACTGTCGGG-----                                                                    | mirR    | 20  | 38    |
| -----TTCGCGGGTACTGTCGGGAC-----                                                                    | mirR    | 20  | 21    |
| -----TCGCGGGTACTGTCGGGAC-----                                                                     | mirR    | 19  | 21    |
| -----CTTCGCGGGTACTGTCGGGAC-----                                                                   | mirR    | 21  | 16    |
| -----TCTTCGCGGGTACTGTCGGGACT-----                                                                 | mirR    | 23  | 13    |
| -----TCTTCGCGGGTACTGTCGG-----                                                                     | mirR    | 19  | 10    |
| -----CTTCGCGGGTACTGTCGGG-----                                                                     | mirR    | 19  | 10    |
| -----TCTTCGCGGGTACTGTCGGGACTT-----                                                                | mirR    | 24  | 3     |
| -----TTCGCGGGTACTGTCGGGA-----                                                                     | mirR    | 19  | 3     |
| -----TCGCGGGTACTGTCGGGACTTG-----                                                                  | mirR    | 22  | 2     |
| -----GTCTTCGCGGGTACTGTCG-----                                                                     | mirR    | 19  | 2     |
| -----CTTCGCGGGTACTGTCGGGACT-----                                                                  | mirR    | 22  | 2     |
| -----CTTCGCGGGTACTGTCGGGACTT-----                                                                 | mirR    | 23  | 2     |
| -----TTCGCGGGTACTGTCGGGACT-----                                                                   | mirR    | 21  | 2     |
| -----TTCGCGGGTACTGTCGGGACTTGT-----                                                                | mirR    | 24  | 1     |
| -----TCTTCGCGGGTACTGTCGGGACTTG-----                                                               | mirR    | 25  | 1     |
| -----GTCTTCGCGGGTACTGTCGGGAC-----                                                                 | mirR    | 23  | 1     |
| -----CTTCGCGGGTACTGTCGGGACTTG-----                                                                | mirR    | 24  | 1     |
| -----GGGTCTTCGCGGGTACTGT-----                                                                     | mirR    | 19  | 1     |
| -----TTGTAGTTTAGCTATCGGCCG                                                                        | morR    | 22  | 2     |

>mmu-mir-879

|                                                                                                     | species | len | reads |
|-----------------------------------------------------------------------------------------------------|---------|-----|-------|
| ACAAGACAAGTTTCTAGGTCCAGAGGCTTATAGCTCTAAGCCTTGGATGAAAGAGGCTTATGGCTTCAAGCTTTCGGAGCTGGAGACTTACTGCTCTTC | morL    | 18  | 1     |
| --AAGACAAGTTTCTAGGTC-----                                                                           | morL    | 18  | 1     |
| ---AGACAAGTTTCTAGGTCC-----                                                                          | morL    | 21  | 1     |
| ACAAGACAAGTTTCTAGGTCC-----                                                                          | mirL    | 21  | 14    |
| -----AGAGGCTTATAGCTCTAAGCC-----                                                                     | mirL    | 22  | 1     |
| -----AGAGGCTTATAGCTCTAAGCCT-----                                                                    | mirL    | 19  | 1     |
| -----AGAGGCTTATAGCTCTAAG-----                                                                       | mirL    | 24  | 1     |
| -----AGAGGCTTATAGCTCTAAGCCTTG-----                                                                  | mirL    | 18  | 1     |
| -----GAGGCTTATAGCTCTAAG-----                                                                        | loop    | 19  | 4     |
| -----GCCTTGGATGAAAGAGGCT-----                                                                       | mirR    | 22  | 141   |
| -----CTTATGGCTTCAAGCTTTCGGA-----                                                                    | mirR    | 21  | 119   |
| -----GCTTATGGCTTCAAGCTTTCG-----                                                                     | mirR    | 22  | 87    |
| -----GCTTATGGCTTCAAGCTTTCGG-----                                                                    | mirR    | 18  | 60    |
| -----TATGGCTTCAAGCTTTCG-----                                                                        | mirR    | 20  | 29    |
| -----GCTTATGGCTTCAAGCTTTC-----                                                                      |         |     |       |

```

-----GCTTATGGCTTCAAGCTTT----- mirR 19 22
-----CTTATGGCTTCAAGCTTTCGGAG----- mirR 23 20
-----CTTATGGCTTCAAGCTTTCGG----- mirR 21 18
-----GCTTATGGCTTCAAGCTTTCGGA----- mirR 23 9
-----GCTTATGGCTTCAAGCTTTCGGAG----- mirR 24 8
-----CTTATGGCTTCAAGCTTTCG----- mirR 20 3
-----TTATGGCTTCAAGCTTTCG----- mirR 19 3
-----GGCTTATGGCTTCAAGCT----- mirR 18 3
-----CTTATGGCTTCAAGCTTTCGGAGC----- mirR 24 2
-----TATGGCTTCAAGCTTTCGG----- mirR 19 2
-----CTTATGGCTTCAAGCTTTC----- mirR 19 2
-----ATGGCTTCAAGCTTTCGG----- mirR 18 2
-----TTATGGCTTCAAGCTTTC----- mirR 18 2
-----GGCTTATGGCTTCAAGCT----- mirR 19 1
-----GGCTTATGGCTTCAAGCTTTCG----- mirR 22 1
-----GCTGGAGACTTACTGCTC--- morR 18 1
-----TGGAGACTTACTGCTCTT- morR 18 1
-----CTGGAGACTTACTGCTCTTC morR 20 1

```

>mmu-mir-467f

```

ATCCTGTACCCAGAAATCGAACGGGGGTGGGTGTGTGTGTAGGTGTGTGTGTGTATGTATGTATATACACACACACCTACACACAGCTTTTTTGGAAATTTTT species len reads
---CTGTACCCAGAAATCGAA----- morL 18 3
--CCTGTACCCAGAAATCGA----- morL 18 2
ATCCTGTACCCAGAAATCGAAC----- morL 22 2
-----ACCCAGAAATCGAACGGG----- morL 18 1
-----GGGGGTGGGTGTGTGTGT----- mirL 18 17
-----GGGGGTGGGTGTGTGTGTA----- mirL 19 11
-----GGGTGGGTGTGTGTGTAG----- mirL 18 5
-----GGGTGGGTGTGTGTGTAGGTGTGTGTGTGT----- mirL 32 3
-----CGGGGTGGGTGTGTGTG----- mirL 18 3
-----GGGGTGGGTGTGTGTGTA----- mirL 18 2
-----AACGGGGTGGGTGTGTGT----- mirL 19 1
-----GGTGGGTGTGTGTGTAGGT----- mirL 19 1
-----AACGGGGTGGGTGTGTG----- mirL 18 1
-----GGGGTGGGTGTGTGTGTAG----- mirL 20 1
-----GGTGGGTGTGTGTGTAGGTGTGTGTGTGTA----- mirL 32 1
-----ACGGGGTGGGTGTGTGT----- mirL 18 1
-----GGTGTGTGTGTGTGTATGTATGT----- loop 23 2
-----TATACACACACACCTACA----- mirR 20 141
-----ATATACACACACACCTACA----- mirR 21 137
-----ATATACACACACACCTACAC----- mirR 22 38
-----ATATACACACACACCTAC----- mirR 20 29
-----ATACACACACACCTACA----- mirR 19 26
-----ATACACACACACCTAC----- mirR 18 21
-----ATACACACACACCTACAC----- mirR 22 16
-----TATACACACACACCTACAC----- mirR 21 15

```

```

-----ATATACACACACACCT----- mirR 18 14
-----ATATACACACACACCTA----- mirR 19 8
-----TATATACACACACACCTACA----- mirR 22 5
-----TATACACACACACCTAC----- mirR 19 4
-----TATACACACACACCTACACA----- mirR 22 4
-----ACACACACACACCTACAC----- mirR 20 4
-----ACACACACACACCTACAC----- mirR 18 3
-----TACACACACACACCTACA----- mirR 18 3
-----ATATACACACACACCTACACA----- mirR 23 3
-----ATACACACACACACCTACAC----- mirR 20 3
-----ACACACACACACCTACACA----- mirR 19 3
-----TATACACACACACCTACACAC----- mirR 23 3
-----TATATACACACACACACC----- mirR 18 3
-----ATACACACACACACCTACACACA----- mirR 23 2
-----TATACACACACACACCTA----- mirR 18 2
-----ATACACACACACACCTACACA----- mirR 21 2
-----ACACACACACACCTACACACAG----- mirR 22 1
-----TACACACACACACCTACACACA----- mirR 22 1
-----TATATACACACACACCTAC----- mirR 21 1
-----ATACACACACACACCTACACACAGC----- mirR 25 1
-----TATACACACACACACCTACACACA----- mirR 24 1
-----ACAGCTTTTTTGGAAATTT----- morR 18 1
-----CAGCTTTTTTGGAAATTTTT----- morR 19 1
-----ACACAGCTTTTTTGGAAAT----- morR 18 1

```

>mmu-mir-680-3

```

AGGGAGGGGCCGAGGGGGGATTTAACAAAGAACAAAAAGGTGGGCATCTGCTGACATGGGGGCAGAAGTCAGGCTCTAGGCAGCAGGTACTCTTCATCTTATCTCCAGAACATAGATCCTCCTTAAC species len
AGGGAGGGGCCGAGGGGGG----- morL 19 3
AGGGAGGGGCCGAGGGGG----- morL 18 1
--GGAGGGGCCGAGGGGGGA----- morL 18 1
-----GATTTAACAAAGAACAAA----- mirL 18 428
-----GATTTAACAAAGAACAAAA----- mirL 20 13
-----GGGATTTAACAAAGAACAAA----- mirL 20 12
-----ATTTAACAAAGAACAAAA----- mirL 18 8
-----GATTTAACAAAGAACAAAA----- mirL 19 7
-----GGGATTTAACAAAGAACA----- mirL 18 7
-----TTT AACAAAGAACAAAA----- mirL 18 7
-----GGGATTTAACAAAGAACAA----- mirL 19 6
-----GGGATTTAACAAAGAACAAAA----- mirL 21 3
-----GGATTTAACAAAGAACAA----- mirL 18 3
-----GGGGATTTAACAAAGAAC----- mirL 18 2
-----GGATTTAACAAAGAACAAA----- mirL 19 2
-----ATTTAACAAAGAACAAAA----- mirL 19 2
-----GGATTTAACAAAGAACAAAA----- mirL 20 2
-----TTT AACAAAGAACAAAAAG----- mirL 20 1
-----TTT AACAAAGAACAAAAAA----- mirL 19 1

```

```

-----ACATAGATCCTCCTTAAC mirR 18 20
-----AACATAGATCCTCCTTAAC mirR 19 2
-----AACATAGATCCTCCTTAA- mirR 18 1

>mmu-mir-3097
CCTTAGGAATGTTTGAGTGACACAGGTGGGAAGTGTGTGTCCAGTGGGTGTGTCTACAGATCTGCTCAGACCTTTCTACCTGTGCTCTCTTACAGGGCCCGGGAGA species len reads
----AGGAATGTTTGAGTGACA----- morL 18 2
-CTTAGGAATGTTTGAGTG----- morL 18 2
CCTTAGGAATGTTTGAGT----- morL 18 1
-----CACAGGTGGGAAGTGTGTGTCCAG----- mirL 24 52
-----CACAGGTGGGAAGTGTGTGTCCA----- mirL 23 43
-----CACAGGTGGGAAGTGTGTGTCCAGT----- mirL 25 21
-----CACAGGTGGGAAGTGTGTGTGTC----- mirL 21 11
-----ACACAGGTGGGAAGTGTGTGTCC----- mirL 23 8
-----CACAGGTGGGAAGTGTGTGTCCAGTG----- mirL 26 7
-----ACACAGGTGGGAAGTGTGTGTCCAG----- mirL 25 6
-----CACAGGTGGGAAGTGTGTGT----- mirL 20 6
-----CACAGGTGGGAAGTGTGTGTCC----- mirL 22 5
-----GACACAGGTGGGAAGTGTGTGTCCAGT----- mirL 27 4
-----ACACAGGTGGGAAGTGTGTGTCCA----- mirL 24 4
-----AGGTGGGAAGTGTGTGTGTC----- mirL 18 3
-----GACACAGGTGGGAAGTGTGTGT----- mirL 22 3
-----ACAGGTGGGAAGTGTGTGTCCAGT----- mirL 24 3
-----ACAGGTGGGAAGTGTGTGTCCAG----- mirL 23 3
-----ACACAGGTGGGAAGTGTGTGT----- mirL 21 2
-----ACACAGGTGGGAAGTGTGTGTC----- mirL 22 2
-----GACACAGGTGGGAAGTGTGTGTCCA----- mirL 25 2
-----GACACAGGTGGGAAGTGT----- mirL 18 1
-----ACAGGTGGGAAGTGTGTGTGTC----- mirL 20 1
-----ACACAGGTGGGAAGTGTGT----- mirL 18 1
-----ACACAGGTGGGAAGTGTGTGTCCAGTG----- mirL 27 1
-----CAGGTGGGAAGTGTGTGTGTC----- mirL 19 1
-----TGACACAGGTGGGAAGTGT----- mirL 18 1
-----GGGTGTGTCTACAGATCT----- loop 18 1
-----GTGTGTCTACAGATCTGC----- loop 18 1
-----CTCAGACCTTTCTACCTGTCAG----- mirR 22 153
-----CTCAGACCTTTCTACCTGTCA----- mirR 21 103
-----CTCAGACCTTTCTACCTGTCAGC----- mirR 23 31
-----TCAGACCTTTCTACCTGTCAGC----- mirR 22 11
-----CTCAGACCTTTCTACCTGTC----- mirR 20 9
-----GCTCAGACCTTTCTACCTGTCA----- mirR 22 9
-----CTCAGACCTTTCTACCTGT----- mirR 19 3
-----AGACCTTTCTACCTGTCA----- mirR 18 3
-----CTCAGACCTTTCTACCTG----- mirR 18 3
-----GCTCAGACCTTTCTACCTGTCAGCTCTCT----- mirR 29 1
-----CAGACCTTTCTACCTGTCAGC----- mirR 21 1

```

C:\Documents and Settings\hong\Desktop\Reprogramming-total RNA.txt

```
-----CTCAGACCTTTCTACCTGTCAGCT----- mirR 24 1
-----GCTCAGACCTTTCTACCTGTCAGCTCTTTAC----- mirR 32 1
-----AGCTCTTTACAGGGCCC----- morR 18 2
-----TCTTACAGGGCCCGGAGA morR 19 1
-----GCTCTTTACAGGGCCC----- morR 18 1
-----AGCTCTTTACAGGGCCCGG--- morR 21 1
```

>mmu-mir-1958

```
GATGAGCCTAGAAGAGAACTTACTGCTTCCACTTTCCTATAGTTTAATTTCTAACTGCATTCTATAGGAAAGTGAAGCAGTAAGTTCTTCTTAGGTTCCGTGAC species len reads
-ATGAGCCTAGAAGAGAAC----- morL 18 4
---GAGCCTAGAAGAGAACTT----- morL 18 2
GATGAGCCTAGAAGAGAACT----- morL 20 1
-----CTTACTGCTTCCACTTTC----- mirL 18 4
-----TTACTGCTTCCACTTTCCTATA----- mirL 22 2
-----TACTGCTTCCACTTTCCTATA----- mirL 21 1
-----CTTACTGCTTCCACTTTC----- mirL 19 1
-----TTACTGCTTCCACTTTCCTAT----- mirL 21 1
-----TTACTGCTTCCACTTTCCT----- mirL 19 1
-----TACTGCTTCCACTTTCCTATAG----- mirL 22 1
-----TTACTGCTTCCACTTTCCTATAG----- mirL 23 1
-----AACTTACTGCTTCCACTTTCCT----- mirL 22 1
-----TACTGCTTCCACTTTCCTATAG----- mirL 23 1
-----TAGGAAAGTGAAGCAGTAAG----- mirR 21 267
-----TAGGAAAGTGAAGCAGTAAGT----- mirR 22 99
-----TAGGAAAGTGAAGCAGTAA----- mirR 20 86
-----TAGGAAAGTGAAGCAGT----- mirR 18 19
-----AGGAAAGTGAAGCAGTAAG----- mirR 20 10
-----AGGAAAGTGAAGCAGTAA----- mirR 19 7
-----AGGAAAGTGAAGCAGTAAGT----- mirR 21 4
-----GGAAAGTGAAGCAGTAAG----- mirR 19 3
-----GGAAAGTGAAGCAGTAAGT----- mirR 20 3
-----GAAAGTGAAGCAGTAAGT----- mirR 19 2
-----GGAAAGTGAAGCAGTAA----- mirR 18 1
-----AGGAAAGTGAAGCAGTA----- mirR 18 1
-----AAGTTCTTCTTAGGTTTC----- morR 18 3
-----CTCTTCTAGGTTCCGTGAC morR 19 1
```

>mmu-mir-1947

```
GAAAGATGAACAAGGTGGTGGAGGACGAGCTAGCTGAGTGTGCAGACACTCTAAGAGCACTGAGCTAGCTCTCCCTCCATGCCCTGCTCAATCGTGAAGTTCCGACGTGTGCCTGACCTCACAG species len r
GAAAGATGAACAAGGTGG----- morL 18 3
-AAAGATGAACAAGGTGGT----- morL 18 3
GAAAGATGAACAAGGTGGT----- morL 19 2
---AGATGAACAAGGTGGTGGAG----- morL 20 1
---GATGAACAAGGTGGTGGAG----- morL 20 1
---AGATGAACAAGGTGGTGGGA----- morL 19 1
-----AGGACGAGCTAGCTGAGTGTGC----- mirL 22 75
```

```

-----AGGACGAGCTAGCTGAGTGC----- mirL 20 39
-----AGGACGAGCTAGCTGAGTG----- mirL 19 33
-----AGGACGAGCTAGCTGAGTGCTGC----- mirL 23 18
-----AGGACGAGCTAGCTGAGT----- mirL 18 17
-----GGACGAGCTAGCTGAGTGC----- mirL 19 12
-----AGGACGAGCTAGCTGAGTGCT----- mirL 21 10
-----AGGACGAGCTAGCTGAGTGCTGCA----- mirL 24 7
-----GGACGAGCTAGCTGAGTGCT----- mirL 20 3
-----GACGAGCTAGCTGAGTGCT----- mirL 19 2
-----GGAGGACGAGCTAGCTGAG----- mirL 19 2
-----GGACGAGCTAGCTGAGTG----- mirL 18 1
-----GAGGACGAGCTAGCTGAGTGCTG----- mirL 23 1
-----GAGGACGAGCTAGCTGAGTGCT----- mirL 22 1
-----ACGAGCTAGCTGAGTGCTG----- mirL 19 1
-----ACGAGCTAGCTGAGTGCT----- mirL 18 1
-----GCCCTGCTCAATCGTGAAGTTC----- mirR 22 230
-----CCCTGCTCAATCGTGAAGTTC----- mirR 21 19
-----CCCTGCTCAATCGTGAAGTTCC----- mirR 22 8
-----GCCCTGCTCAATCGTGAAGTT----- mirR 21 7
-----GCCCTGCTCAATCGTGAAGT----- mirR 20 6
-----GCCCTGCTCAATCGTGAAGTTCC----- mirR 23 3
-----CCCTGCTCAATCGTGAAGTT----- mirR 20 3
-----GCCCTGCTCAATCGTGAA----- mirR 18 3
-----CCCTGCTCAATCGTGAAGT----- mirR 19 2
-----CCTGCTCAATCGTGAAGTT----- mirR 19 1
-----GCCCTGCTCAATCGTGAAGTTCCG----- mirR 24 1
-----CCCTGCTCAATCGTGAAG----- mirR 18 1
-----CTGCTCAATCGTGAAGTT----- mirR 18 1
-----CGACGTGTGCCTGACCTC----- morR 18 1
-----CGTGTGCCTGACCTCACAG----- morR 19 1
-----CGTGTGCCTGACCTCAC----- morR 18 1
-----TCCGACGTGTGCCTGACCT----- morR 19 1
-----ACGTGTGCCTGACCTCAC----- morR 18 1

```

>mmu-mir-3058

```

ATTCTCCAGCGTTGGAGTCAGCCACGGCTTACCTGGAAGATTGAATGTCTACTTGGCTTTCTTCTGTCAGCCGTTGGGTGCCTCTTGCTACTGGAAGAGCTCTG species len reads
ATTCTCCAGCGTTGGAGTC----- morL 19 1
-----TCAGCCACGGCTTACCTGGAAGA----- mirL 23 183
-----CAGCCACGGCTTACCTGGAAGA----- mirL 22 17
-----TCAGCCACGGCTTACCTGGA----- mirL 20 10
-----TCAGCCACGGCTTACCTGGAA----- mirL 21 9
-----TCAGCCACGGCTTACCTGG----- mirL 19 3
-----TCAGCCACGGCTTACCTGGAAGAT----- mirL 24 3
-----CAGCCACGGCTTACCTGGAAGAT----- mirL 23 3
-----TCAGCCACGGCTTACCTGGAAG----- mirL 22 1
-----AGTCAGCCACGGCTTACC----- mirL 18 1

```

```

-----GCCACGGCTTACCTGGAA----- mirL 18 1
-----GAATGTCTACTTGGCTTTC----- loop 19 1
-----TTCTGTTCAGCCGTGGGTGCCT----- mirR 22 101
-----TTCTGTTCAGCCGTGGGTGCCTC----- mirR 23 46
-----TTCTGTTCAGCCGTGGGTGCCTCT----- mirR 24 45
-----TTCTGTTCAGCCGTGGGTGC----- mirR 20 31
-----TTCTGTTCAGCCGTGGGTGCC----- mirR 21 22
-----TTCTGTTCAGCCGTGGGTGCCTCT----- mirR 25 15
-----TCCTGTTCAGCCGTGGGTGCCT----- mirR 21 8
-----TTCTGTTCAGCCGTGGGTGC----- mirR 18 6
-----TCCTGTTCAGCCGTGGGTGCCTC----- mirR 22 4
-----TCCTGTTCAGCCGTGGGTGCCTCT----- mirR 23 2
-----CTTCTGTTCAGCCGTGGGTGC----- mirR 18 1
-----CTTCTGTTCAGCCGTGGGTGCCT----- mirR 23 1
-----CCTGTTCAGCCGTGGGTGCCTC----- mirR 21 1
-----TCCTGTTCAGCCGTGGGTGCCTCT----- mirR 24 1
-----TCTTCTGTTCAGCCGTGGGTGC----- mirR 18 1
-----GCTACTGGAAGAGCTCTG morR 18 1
-----CCTCTTGCTACTGGAAGA----- morR 18 1
-----CTCTTGCTACTGGAAGAG----- morR 18 1

>mmu-mir-465b-1
TATTTAGAATGGTGCTGATCTGATGAAATAAAAAATTGATCAGGGCCTTCTAAGTAGAGTAAGGCTTACCAACTATACATTTAATATGACTTGTAGATGAAT species len reads
TATTTAGAATGGTGCTGATCTG----- mirL 22 366
TATTTAGAATGGTGCTGATCT----- mirL 21 50
TATTTAGAATGGTGCTGATCTGA----- mirL 23 38
TATTTAGAATGGTGCTGATC----- mirL 20 30
-ATTTAGAATGGTGCTGATCTG----- mirL 21 13
-ATTTAGAATGGTGCTGATCTGA----- mirL 22 4
---TTAGAATGGTGCTGATCTG----- mirL 19 2
TATTTAGAATGGTGCTGATCTGATG----- mirL 25 1
-ATTTAGAATGGTGCTGATCT----- mirL 20 1
TATTTAGAATGGTGCTGATCTGATGA----- mirL 26 1
-----GCTTACCAACTATACATT----- mirR 18 7
-----CTTACCAACTATACATTT----- mirR 18 2
-----GGCTTACCAACTATACAT----- mirR 18 1
-----AAGGCTTACCAACTATAC----- mirR 18 1
-----TTAATATGACTTGTAGAT----- morR 19 1
-----TATGACTTGTAGATGAAT morR 18 1

>mmu-mir-465b-2
TATTTAGAATGGTGCTGATCTGATGAAATAAAAAATTGATCAGGGCCTTCTAAGTAGAGTAAGGCTTACCAACTATACATTTAATATGACTTGTAGATGAAT species len reads
TATTTAGAATGGTGCTGATCTG----- mirL 22 366
TATTTAGAATGGTGCTGATCT----- mirL 21 50
TATTTAGAATGGTGCTGATCTGA----- mirL 23 38
TATTTAGAATGGTGCTGATC----- mirL 20 30

```

```
-ATTTAGAATGGTGCTGATCTG----- mirL 21 13
-ATTTAGAATGGTGCTGATCTGA----- mirL 22 4
---TTAGAATGGTGCTGATCTG----- mirL 19 2
TATTTAGAATGGTGCTGATCTGATG----- mirL 25 1
-ATTTAGAATGGTGCTGATCT----- mirL 20 1
TATTTAGAATGGTGCTGATCTGATGA----- mirL 26 1
-----GCTTACCAACTATACATT----- mirR 18 7
-----CTTACCAACTATACATTT----- mirR 18 2
-----GGCTTACCAACTATACAT----- mirR 18 1
-----AAGGCTTACCAACTATAC----- mirR 18 1
-----TTTAATATGACTTGTAGAT---- morR 19 1
-----TATGACTTGTAGATGAAT morR 18 1
```

>mmu-mir-680-2

```
TTATACAAAGAACAAGAAGTGGGCATCTGCTGACATGGGGGCCGAAGTCAGGCGCCAGGCATCGGGCACTCTGGATCTTATCTCTGGAACATTGATCCTCCTTGACAGCCTTGGGGGTGAGGCTGGGCTCAGGCTGACTC
-----AAAGAACAAGAAGTGGG-----
---ACAAGAACAAGAAGTG-----
---CAAAGAACAAGAAGTGG-----
--ATACAAAGAACAAGAAG-----
TTATACAAAGAACAAGAA-----
-----GGGCATCTGCTGACATGGGGG-----
-----GGGCATCTGCTGACATGGGG-----
-----GCATCTGCTGACATGGGG-----
-----GGCATCTGCTGACATGGGG-----
-----GGGCATCTGCTGACATGG-----
-----GGGCATCTGCTGACATGGGGGC-----
-----GGGCATCTGCTGACATGGGGGCC-----
-----CATCTGCTGACATGGGG-----
-----GGGCATCTGCTGACATGG-----
-----GTGGGCATCTGCTGACATGG-----
-----GTGGGCATCTGCTGACAT-----
```

>mmu-mir-327

```
GGTTTGATGCCCTTATAACTTGAGGGGCATGAGGATAGTCAGTAGTCCAACATCCCTCTTGATGGCACATTGCACATAGTTGCAATGGCTTATGAGGTCTTGTTGAGACAC species len reads
-GTTTGATGCCCTTATAACT----- morL 19 1
GGTTTGATGCCCTTATAA----- morL 18 1
-----ACTTGAGGGGCATGAGGAT----- mirL 19 369
```



C:\Documents and Settings\hong\Desktop\Reprogramming-total RNA.txt

```
-----ACTTGAGGGGCATGAGGA----- mirL 18 63
-----ACTTGAGGGGCATGAGGATA----- mirL 20 21
-----CTTGAGGGGCATGAGGAT----- mirL 18 5
-----AACTTGAGGGGCATGAGGAT----- mirL 20 1
-----TTATGAGGTCTTGTTTCAGACAC----- mirR 22 17
-----GCTTATGAGGTCTTGTTTC----- mirR 18 5
-----GGCTTATGAGGTCTTGTT----- mirR 18 1
```

>mmu-mir-3107

```
GTGTGCTCCACCCCTGACGCATCCTGTACTGAGCTGCCCCGAGCTGAGCACAGTGAAGGACCTCGGGGCAGCTCAGTACAGGACCCCTCAGGGAGGGCGAGATCAGA species len reads
----TCTCCACCCCTGACGCAT----- morL 18 4
GTGTGCTCCACCCCTGACG----- morL 19 1
--TTGTCTCCACCCCTGACG----- morL 18 1
----CTCCACCCCTGACGCATC----- morL 18 1
-----TCCTGTACTGAGCTGCCCCGAGC----- mirL 23 376
-----TCCTGTACTGAGCTGCCCCGAGCT----- mirL 24 3
-----ATCCTGTACTGAGCTGCC----- mirL 18 3
-----TCCTGTACTGAGCTGCCCCGAGCTGAG----- mirL 27 2
-----CCTGTACTGAGCTGCCCCGAGC----- mirL 22 2
-----TCCTGTACTGAGCTGCCCCGAGCTG----- mirL 25 2
-----TCCTGTACTGAGCTGCCCCGAGCTGA----- mirL 26 2
-----TCCTGTACTGAGCTGCCCCGAGCTGAGC----- mirL 28 1
-----ATCCTGTACTGAGCTGCCC----- mirL 19 1
-----CTGTACTGAGCTGCCCCGAGCT----- mirL 22 1
-----GCATCCTGTACTGAGCTG----- mirL 18 1
-----CATCCTGTACTGAGCTGCCCCGA----- mirL 23 1
-----GAGCACAGTGAAGGACCTC----- loop 19 3
-----GCTGAGCACAGTGAAGGA----- loop 18 2
-----AGCACAGTGAAGGACCTC----- loop 18 1
-----GAGCACAGTGAAGGACCT----- loop 18 1
-----CTGAGCACAGTGAAGGAC----- loop 18 1
-----CGGGGCAGCTCAGTACAGGAC----- mirR 21 41
-----CGGGGCAGCTCAGTACAGGACC----- mirR 22 8
-----CGGGGCAGCTCAGTACAGGACCC----- mirR 23 2
-----GGCAGCTCAGTACAGGAC----- mirR 18 1
-----GGGGCAGCTCAGTACAGGACCC----- mirR 22 1
-----CCCCTCAGGGAGGGCGAG----- morR 18 3
-----TCAGGGAGGGCGAGATCAGA----- morR 20 1
-----ACCCCTCAGGGAGGGCGA----- morR 18 1
```

>mmu-mir-208b

```
CCCCACCTCCTGCTCCTCTCAGGGAAGCTTTTGTGCTCGCGTTATGTTTCTCATCCGAATATAAGACGAACAAAAGGTTTGTCTGAGGGCTGAGTGTCTCCACCTGGGGTACGGTGCTGTAGGGAATGGGGCTG specie
---CCACCTCCTGCTCCTCTC----- morL 1
--CCCACCTCCTGCTCCTCT----- morL 1
---CCACCTCCTGCTCCTCTCA----- morL 1
---ACCTCCTGCTCCTCTCAG----- morL 1
```

```

CCCCACCTCCTGCTCCTCTC----- morL 2
-CCCACCTCCTGCTCCTCTC----- morL 2
----CACCTCCTGCTCCTCTCA----- morL 1
--CCCACCTCCTGCTCCTCTCAGG----- morL 2
---CCACCTCCTGCTCCTCTCAG----- morL 2
-----TCCTGCTCCTCTCAGGGA----- morL 1
-----GGAAGCTTTTTGCTCGCGT----- mirL 1
-----AGCTTTTTGCTCGCGTTA----- mirL 1
-----CTCCCACCTGGGGTACGG----- mirL 1
-----CTCCCACCTGGGGTACGGT----- mirL 1
-----TCCCACCTGGGGTACGGT----- mirL 1
-----CCCACCTGGGGTACGGTG----- mirL 1
-----TCCCACCTGGGGTACGGTG----- mirL 1
-----GTGCTCCCACCTGGGGTA----- mirL 1
-----GTGCTCCCACCTGGGGTAC----- mirL 1
-----GCTCCCACCTGGGGTACGG----- mirL 1
-----GTGCTCCCACCTGGGGTACGG----- mirL 2
-----GCTCCCACCTGGGGTACGGT----- mirL 2
-----CTGTAGGGAATGGGGCTG----- morL 1
-----GTGCTGTAGGGAATGGGG----- morR 1
-----GGTGTGTAGGGAATGGG----- morR 1

```

>mmu-mir-871

```

TGTGAGTTGTGTGCAGTGCTCTATTAGATTAGTGCCAGTCATGTGAAATACATATGACTGGCACCATTCTGGATAATGTAATGCTCACTATATCTTCAAGTGATTGACCCTGGATGTTTCATGGT species len
---GAGTTGTGTGCAGTGCTCT----- morL 19 2
TGTGAGTTGTGTGCAGTGC----- morL 19 1
---GAGTTGTGTGCAGTGCT----- morL 18 1
TGTGAGTTGTGTGCAGTG----- morL 18 1
-GTGAGTTGTGTGCAGTGCTC----- morL 20 1
---TTGTGTGCAGTGCTCTAT----- morL 18 1
-----TATTCAGATTAGTGCCAGTCATG----- mirL 23 167
-----TATTCAGATTAGTGCCAGTCAT----- mirL 22 122
-----TATTCAGATTAGTGCCAGTCA----- mirL 21 38
-----TTCAGATTAGTGCCAGTCAT----- mirL 20 13
-----ATTCAGATTAGTGCCAGTCATG----- mirL 22 11
-----TCAGATTAGTGCCAGTCATG----- mirL 20 9
-----TTCAGATTAGTGCCAGTCATG----- mirL 21 8
-----TATTCAGATTAGTGCCAGTCATGT----- mirL 24 6
-----TATTCAGATTAGTGCCAGTC----- mirL 20 5
-----ATTCAGATTAGTGCCAGTCA----- mirL 20 4
-----TATTCAGATTAGTGCCAGT----- mirL 19 3
-----TATTCAGATTAGTGCCAG----- mirL 18 2
-----ATTCAGATTAGTGCCAGTCAT----- mirL 21 1
-----ATTCAGATTAGTGCCAGTCATGT----- mirL 23 1
-----TTCAGATTAGTGCCAGTC----- mirL 18 1
-----ATTCAGATTAGTGCCAGT----- mirL 18 1

```

```

-----TCAGATTAGTGCCAGTCA----- mirL 18 1
-----CACTATATTCTTCAAGTGAT----- mirR 20 44
-----TCACTATATTCTTCAAGT----- mirR 18 2
-----CACTATATTCTTCAAGTGA----- mirR 19 1
-----ACTATATTCTTCAAGTGAT----- mirR 19 1
-----TATATTCTTCAAGTGAT----- mirR 18 1
-----CTCACTATATTCTTCAAGT----- mirR 19 1
-----ACCTGGATGTTTCATGGT morR 18 5
-----TTGACCCTGGATGTTTCAT--- morR 18 2
-----ATTTGACCCTGGATGTTTC--- morR 18 1

```

>mmu-mir-190b

```

GCCTGCCTGCTTCTGTGATATGTTTGATATTGGGTTGTTAAATTATGAACCAACTGAATGTCAAGCATACTCTCACAGCAGTAAGGAGACTTGGC species len reads
GCCTGCCTGCTTCTGTGT----- morL 18 5
--CTGCCTGCTTCTGTGTGA----- morL 18 3
GCCTGCCTGCTTCTGTGT----- morL 19 1
--CCTGCCTGCTTCTGTGT----- morL 18 1
-----TGATATGTTTGATATTGGGTT----- mirL 21 176
-----TGATATGTTTGATATTGGGTTG----- mirL 22 137
-----TGATATGTTTGATATTGGGTTGT----- mirL 23 48
-----TGATATGTTTGATATTGGGT----- mirL 20 20
-----TGATATGTTTGATATTGGGTTGTT----- mirL 24 11
-----TGATATGTTTGATATTGGG----- mirL 19 7
-----ATATGTTTGATATTGGGTT----- mirL 19 4
-----GATATGTTTGATATTGGGTT----- mirL 20 2
-----GATATGTTTGATATTGGGTTG----- mirL 21 2
-----ATATGTTTGATATTGGGTTGT----- mirL 21 1
-----TATGTTTGATATTGGGTTGT----- mirL 20 1
-----ACTGAATGTCAAGCATACTCTC----- mirR 22 13
-----ACTGAATGTCAAGCATACTCTCA----- mirR 23 6
-----ACTGAATGTCAAGCATACTCT----- mirR 21 2
-----CTGAATGTCAAGCATACTCTCA----- mirR 22 1
-----CCAAGTGAATGTCAAGCA----- mirR 18 1
-----CTGAATGTCAAGCATACT----- mirR 18 1
-----CAAGTGAATGTCAAGCATACT----- mirR 21 1
-----GCAGTAAGGAGACTTGGC morR 18 1
-----ACAGCAGTAAGGAGACTT--- morR 18 1
-----CTCACAGCAGTAAGGAGA----- morR 18 1

```

>mmu-mir-1892

```

GCCTGGATATATTTCTACTCTTGACCAAAGTTTGTGAAGAAACAATACAGAATTTGGGGACGGGAGGGAGGATACTTTGAGAACTACTTAC species len reads
--CCTGGATATATTTCTACT----- morL 18 2
---TGGATATATTTCTACTCTT----- morL 19 1
-----ATATATTTCTACTCTTGA----- morL 18 1
GCCTGGATATATTTCTACT----- morL 18 1
-----TGACCAAAGTTTGTGAAG----- mirL 18 56

```

```
-----CCAAAGTTTGTAAAGAA----- mirL 18 3
-----GACCAAAGTTTGTAAAG----- mirL 18 1
-----TTGACCAAAGTTTGTAA----- mirL 18 1
-----TGACCAAAGTTTGTAAAG----- mirL 19 1
-----AAGAAACAATACAGAATT----- loop 18 1
-----ATTTGGGGACGGGAGGGAGGAT----- mirR 22 230
-----ATTTGGGGACGGGAGGGAGGA----- mirR 21 45
-----ATTTGGGGACGGGAGGGAG----- mirR 19 29
-----ATTTGGGGACGGGAGGGAGG----- mirR 20 26
-----TGGGGACGGGAGGGAGGAT----- mirR 19 19
-----ATTTGGGGACGGGAGGGGA----- mirR 18 4
-----TTTGGGGACGGGAGGGAGGA----- mirR 20 3
-----TGGGGACGGGAGGGAGGA----- mirR 18 3
-----TTTGGGGACGGGAGGGAGGAT----- mirR 21 2
-----TTTGGGGACGGGAGGGAGG----- mirR 19 2
-----TTGGGGACGGGAGGGAGGA----- mirR 19 1
-----TTTGGGGACGGGAGGGAG----- mirR 18 1
-----TTGGGGACGGGAGGGAGGAT----- mirR 20 1
-----GAATTTGGGGACGGGAGG----- mirR 18 1
-----ACTTTGAGAACTACTTAC morR 18 1
```

>mmu-mir-1969

```
CTGATAGTGCTAGAGGCTGAAGATGGAGACTTTAACATGGGTGCTCTTAAAATCTGTTAACATCCATGCTGCCTCCATTTCTGGTCTGTAGACATCACAGCACCCAGAGGAAGGAAGCTTGTAACATCCTAATCACGGGGCT
---ATAGTGCTAGAGGCTGAA-----
CTGATAGTGCTAGAGGCTG-----
-----AAGATGGAGACTTTAACATGGGT-----
-----AGATGGAGACTTTAACATGGGT-----
-----AAGATGGAGACTTTAACATGGGTGC-----
-----AAGATGGAGACTTTAACATGGG-----
-----AAGATGGAGACTTTAACATG-----
-----GATGGAGACTTTAACATGGGT-----
-----AGATGGAGACTTTAACATG-----
-----AAGATGGAGACTTTAACATGG-----
-----ATGGAGACTTTAACATGGGT-----
-----ATGGAGACTTTAACATGGG-----
-----GATGGAGACTTTAACATG-----
-----AAGATGGAGACTTTAACATGGGTG-----
-----AAGATGGAGACTTTAACAA-----
-----AGATGGAGACTTTAACATGG-----
-----GATGGAGACTTTAACATGGGTGCT-----
-----GATGGAGACTTTAACATGG-----
-----AGATGGAGACTTTAACATGGG-----
-----ATGGAGACTTTAACATGG-----
-----AGATGGAGACTTTAACATGGGTGCT-----
-----GATGGAGACTTTAACATGGGTGCTC-----
-----TGAAGATGGAGACTTTAAC-----
```

```
-----GAAGATGGAGACTTTAACA-----  
-----GATGGAGACTTTAACATGGGTGC-----  
-----GATGGAGACTTTAACATGGG-----  
-----AGGAAGGAACCTTGTAACA-----  
-----CAGAGGAAGGAACCTTGTA-----  
-----CAGAGGAAGGAACCTTGTA-----  
-----AGGAAGGAACCTTGTAACATC-----  
-----CAGAGGAAGGAACCTTGTAACA-----  
-----AAGGAACCTTGTAACATCC-----  
-----AGGAAGGAACCTTGTAACAT-----  
-----CAGAGGAAGGAACCTTGTAAC-----  
-----CCTAATCACGGGGCT-----
```

>mmu-mir-1961

```
CTAGCCATATCTGAAGTTCAACACGCCCTCCCCTCTTCTCCTATACGTCTATGGAGGATTTACCTCCATATACCTTGAGAGATGAGGTAGTAGTTAGAACTTTCATGGAGCAAAAAGCATTCTCAATTAACATTTGCATGCA  
-----ATATCTGAAGTTCAACAC-----  
-----TATCTGAAGTTCAACACGC-----  
-----CCATATCTGAAGTTCAAC-----  
CTAGCCATATCTGAAGTTCAA-----  
-TAGCCATATCTGAAGTTCAA-----  
-----GCCCTCCCCTCTTCCTAT-----  
-----CGCCCTCCCCTCTTCCTAT-----  
-----CACGCCCTCCCCTCTTCCT-----  
-----ACGCCCTCCCCTCTTCCT-----  
-----CGCCCTCCCCTCTTCCTATA-----  
-----GCCCTCCCCTCTTCCTATA-----  
-----CGCCCTCCCCTCTTCCTA-----  
-----CACGCCCTCCCCTCTTC-----  
-----CGCCCTCCCCTCTTCCTATAC-----  
-----CTCCCCTCTTCCTATACG-----  
-----GCCCTCCCCTCTTCCTATAC-----  
-----CCCTCCCCTCTTCCTATA-----  
-----CCCTCCCCTCTTCCTATAC-----  
-----CGCCCTCCCCTCTTCCTATACG-----  
-----ACGCCCTCCCCTCTTCCTA-----  
-----CACGCCCTCCCCTCTTCCTAT-----  
-----CCTCCCCTCTTCCTATAC-----  
-----CGCCCTCCCCTCTTCCTATACG-----  
-----GCCCTCCCCTCTTCCTATACG-----  
-----ACGCCCTCCCCTCTTCCTATA-----  
-----AGCATTCTCAATTAACA-----  
-----AGCATTCTCAATTAACAT-----  
-----AAGCATTCTCAATTAAC-----  
-----GCATTCTCAATTAACAT-----  
-----AAAAGCATTCTCAATTA-----  
-----ATTTGCATGCA-----
```

```
-----TTGCATGCA
-----GCATGCA
-----ACATTTGCATGCA

>mmu-mir-1192
CAAACAAACAGACCAAATTTGTCATTTGTTGTTTCGATTTGCTCTTTTTGTTTGTGTTTGTGTTTGTGAGACAGGGTCTGGCTTGTATAGCTC species len reads
--ACAAACAGACCAAATTTG----- mirL 18 232
CAAACAAACAGACCAAAT----- mirL 18 8
-AAACAAACAGACCAAATT----- mirL 18 5
--AACAAACAGACCAAATTTG----- mirL 19 3
CAAACAAACAGACCAAATT----- mirL 19 3
----AACAGACCAAATTTGTCT----- mirL 18 1
----AACAGACCAAATTTGTCA----- mirL 18 1
--ACAAACAGACCAAATTTGT----- mirL 19 1
----AACAGACCAAATTTGTCA----- mirL 19 1
-----CTTTGTGTTTGTGAGACA----- mirR 18 135
-----GCTTTGTGTTTGTGAGAC----- mirR 18 2
-----TTTGTGTTTGTGAGACAGGG----- mirR 19 1
-----TTGTGTTTGTGAGACAGGG----- mirR 18 1
-----TTTGTGTTTGTGAGACAGG----- mirR 18 1
-----TTGTGTTTGTGAGACAGGGT----- mirR 19 1
-----TGCTTTGTGTTTGTGAGA----- mirR 18 1
-----GTCTGGCTTGTATAGCTC----- morR 18 1
-----GGTCTGGCTTGTATAGCT----- morR 18 1

>mmu-mir-875
AATTCCCAGTTCTGTGGTACTATACCTCAGTTTATCAGGTGTTCAATTAATAACCTGAAAATACTGAGGCTATGTTT species len reads
--TCCCAGTTCTGTGGTAC----- morL 18 5
AATTCCCAGTTCTGTGGT----- morL 18 4
-----TATACCTCAGTTTATCAGGT----- mirL 22 57
-----TATACCTCAGTTTATCAGGT----- mirL 21 27
-----TATACCTCAGTTTATCAGGTGT----- mirL 23 16
-----TACCTCAGTTTATCAGGTG----- mirL 20 5
-----ACCTCAGTTTATCAGGTG----- mirL 19 5
-----TATACCTCAGTTTATCAGG----- mirL 20 3
-----TATACCTCAGTTTATCAG----- mirL 19 3
-----TATACCTCAGTTTATCA----- mirL 18 2
-----TACCTCAGTTTATCAGG----- mirL 18 1
-----TACCTCAGTTTATCAGGTGT----- mirL 21 1
-----TACTATACCTCAGTTTAA----- mirL 18 1
-----TACCTCAGTTTATCAGGTGTT----- mirL 22 1
-----CCTGAAAATACTGAGGCTATG----- mirR 21 209
-----CCTGAAAATACTGAGGCTAT----- mirR 20 38
-----CCTGAAAATACTGAGGCTA----- mirR 19 9
-----CTGAAAATACTGAGGCTATG----- mirR 20 6
-----GAAAATACTGAGGCTATGTTT----- mirR 21 1
```

```
-----CACCTGAAAATACTGAGGC----- mirR 19 1
-----CACCTGAAAATACTGAGG----- mirR 18 1
-----CCTGAAAATACTGAGGCT----- mirR 18 1
```

>mmu-mir-344e

```
AAGGATTTGATCAGTCAGGCTTCTGGCTATATTCCAGGACTTACCTGGTCTGGATATAACCAAAGCCTGACTATATGGTGCTAAAGACAAG species len reads
---GATTTGATCAGTCAGGCTTC----- morL 20 36
---GATTTGATCAGTCAGGCT----- morL 18 7
---GATTTGATCAGTCAGGCTT----- morL 19 4
AAGGATTTGATCAGTCAG----- morL 18 1
-----TCTGGCTATATTCCAGGA----- mirL 18 6
-----TCTGGCTATATTCCAGGAC----- mirL 19 1
-----GACTTACCTGGTCCTGGA----- loop 18 1
-----GATATAACCAAAGCCTGACTAT----- mirR 22 273
-----GATATAACCAAAGCCTGACTATA----- mirR 23 25
-----GATATAACCAAAGCCTGAC----- mirR 19 9
-----ATAACCAAAGCCTGACTAT----- mirR 19 8
-----GATATAACCAAAGCCTGACTA----- mirR 21 7
-----GATATAACCAAAGCCTGACT----- mirR 20 4
-----GATATAACCAAAGCCTGA----- mirR 18 2
-----TGGATATAACCAAAGCCTGAC----- mirR 21 2
-----CTGGATATAACCAAAGCCTGAC----- mirR 22 1
-----ATATAACCAAAGCCTGACTATA----- mirR 22 1
-----ATATAACCAAAGCCTGAC----- mirR 18 1
-----TATGGTGCTAAAGACAAG morR 18 6
-----TATATGGTGCTAAAGACA-- morR 18 1
```

>mmu-mir-669b

```
AATGTATGTGCATGTGTATATAGTTTTGTGTGCATGTGCATGTGTGTCTATTAATGTACATATACATACACACAAACATATACACGCATGCGCAGATACAG species len reads
AATGTATGTGCATGTGTATAT----- morL 21 1
AATGTATGTGCATGTGTATA----- morL 18 1
--TGTATGTGCATGTGTATA----- morL 18 1
-AIGTATGTGCATGTGTATAT----- morL 20 1
-----AGTTTTGTGTGCATGTGCATGTGTGTC----- mirL 27 53
-----AGTTTTGTGTGCATGTGCATGTGTGTCT----- mirL 28 17
-----AGTTTTGTGTGCATGTGCATGTGTGTCTA----- mirL 29 3
-----AGTTTTGTGTGCATGTGCATGTGTGTCTAT----- mirL 30 1
-----GTTTTGTGTGCATGTGCATGTGTGTCT----- mirL 27 1
-----ATATACATACACACAAACATAT----- mirR 22 112
-----CATATACATACACACAAACATAT----- mirR 23 62
-----ATATACATACACACAAACATA----- mirR 21 18
-----ATACATACACACAAACATAT----- mirR 20 17
-----ATACATACACACAAACATATA----- mirR 21 14
-----TATACATACACACAAACA----- mirR 18 10
-----ATATACATACACACAAACAT----- mirR 20 10
-----ATATACATACACACAAAC----- mirR 18 9
```

```

-----CATATACATACACACAAACAT----- mirR 21 8
-----TATACATACACACAAACATAT----- mirR 21 7
-----CATATACATACACACAAACATA----- mirR 22 6
-----ATACATACACACAAACATATATAC----- mirR 22 5
-----ACATATACATACACACAAAC----- mirR 20 3
-----TACATACACACAAACATA----- mirR 18 3
-----ACATATACATACACACAAACAT----- mirR 22 3
-----TATACATACACACAAACAT----- mirR 19 3
-----CATATACATACACACAAACA----- mirR 20 2
-----ATATACATACACACAAACA----- mirR 19 2
-----ACATATACATACACACAAACA----- mirR 21 2
-----ATATACATACACACAAACATATA----- mirR 23 2
-----ATACATACACACAAACATA----- mirR 19 2
-----ACATATACATACACACAA----- mirR 18 1
-----TATACATACACACAAACATA----- mirR 20 1
-----ATACATACACACAAACAT----- mirR 18 1
-----ACACGCATGCGCAGATAC-- morR 18 1
-----ACGCATGCGCAGATACAG morR 18 1

```

>mmu-mir-683-1

```

CTGGGAGGCTGCAGTGGACCCAGGCTAAAAGCCAAGCTTTTCTGCACTGCAGTGGATGCCTGCTGTAAGCTGTGTCCTCCTGGGCTGCATGGAGCCCTA species len reads
CTGGGAGGCTGCAGTGGGA----- morL 18 1
-----AGGCTAAAAGCCAAGCTTT----- mirL 19 2
-----AGGCTAAAAGCCAAGCTT----- mirL 18 2
-----CTGCACTGCAGTGGATGC----- loop 18 1
-----CTGCACTGCAGTGGATGCCT----- loop 20 1
-----TCTGCACTGCAGTGGATGC----- loop 19 1
-----CCTGCTGTAAGCTGTGTCCTC----- mirR 21 292
-----TGCTGTAAGCTGTGTCCTC----- mirR 19 36
-----CCTGCTGTAAGCTGTGTCCT----- mirR 20 12
-----GCTGTAAGCTGTGTCCTC----- mirR 18 11
-----CTGCTGTAAGCTGTGTCCTC----- mirR 20 9
-----CCTGCTGTAAGCTGTGTCCTCC----- mirR 22 3
-----CCTGCTGTAAGCTGTGTC----- mirR 19 1
-----CTGCTGTAAGCTGTGTC----- mirR 18 1
-----CCTGCTGTAAGCTGTGTCCTCTGG----- mirR 25 1
-----ATGCCTGCTGTAAGCTGTG----- mirR 19 1
-----CTGCTGTAAGCTGTGTCCT----- mirR 19 1
-----CTGGGCTGCATGGAGCCC-- morR 18 1
-----GGGCTGCATGGAGCCCTA morR 18 1

```

>mmu-mir-683-2

```

CTGGGAGGCTGCAGTGGACCCAGGCTAAAAGCCAAGCTTTTCTGCACTGCAGTGGATGCCTGCTGTAAGCTGTGTCCTCCTGGGCTGCATGGAGCCCTA species len reads
CTGGGAGGCTGCAGTGGGA----- morL 18 1
-----AGGCTAAAAGCCAAGCTTT----- mirL 19 2
-----AGGCTAAAAGCCAAGCTT----- mirL 18 2

```



```

-----CTGCACTGCAGTGGATGC----- loop 18 1
-----CTGCACTGCAGTGGATGCCT----- loop 20 1
-----TCTGCACTGCAGTGGATGC----- loop 19 1
-----CCTGCTGTAAGCTGTGTCCTC----- mirR 21 292
-----TGCTGTAAGCTGTGTCCTC----- mirR 19 36
-----CCTGCTGTAAGCTGTGTCCT----- mirR 20 12
-----GCTGTAAGCTGTGTCCTC----- mirR 18 11
-----CTGCTGTAAGCTGTGTCCTC----- mirR 20 9
-----CCTGCTGTAAGCTGTGTCCTCC----- mirR 22 3
-----CCTGCTGTAAGCTGTGTCCT----- mirR 19 1
-----CTGCTGTAAGCTGTGTCCT----- mirR 18 1
-----CCTGCTGTAAGCTGTGTCCTCCTGG----- mirR 25 1
-----ATGCCTGCTGTAAGCTGTG----- mirR 19 1
-----CTGCTGTAAGCTGTGTCCT----- mirR 19 1
-----CTGGGCTGCATGGAGCCC-- morR 18 1
-----GGGCTGCATGGAGCCCTA morR 18 1

```

>mmu-mir-201

```

AATGATGCTGTGTACAGTACCTTACTCAGTAAGGCATTGTTCTTCTATATTAATAAATGAACAGTGCCTTTCTGTGTAGGGTAATGTGCAACATG species len reads
----ATGCTGTGTACAGTACCT----- morL 18 5
--TGATGCTGTGTACAGTACCT----- morL 20 2
----ATGCTGTGTACAGTACCTT----- morL 19 1
AATGATGCTGTGTACAGTA----- morL 19 1
----TGCTGTGTACAGTACCTT----- morL 18 1
-----TACTCAGTAAGGCATTGTTCT----- mirL 20 86
-----ACTCAGTAAGGCATTGTTCT----- mirL 20 69
-----ACTCAGTAAGGCATTGTTCTT----- mirL 21 27
-----TACTCAGTAAGGCATTGTTCT----- mirL 21 23
-----ACTCAGTAAGGCATTGTTCT----- mirL 19 23
-----TACTCAGTAAGGCATTGTTCTT----- mirL 22 21
-----CTCAGTAAGGCATTGTTCT----- mirL 19 13
-----TACTCAGTAAGGCATTGT----- mirL 18 12
-----TACTCAGTAAGGCATTGTT----- mirL 19 10
-----ACTCAGTAAGGCATTGTT----- mirL 18 9
-----TACTCAGTAAGGCATTGTTCTC----- mirL 23 5
-----CTCAGTAAGGCATTGTTCT----- mirL 18 3
-----TCAGTAAGGCATTGTTCT----- mirL 18 2
-----CTCAGTAAGGCATTGTTCTT----- mirL 20 1
-----CTTCTATATTAATAAATG----- loop 18 1
-----GAACAGTGCCTTTCTGTG----- mirR 18 28
-----CAGTGCCTTTCTGTGTAG----- mirR 18 2
-----ATGAACAGTGCCTTTCTG----- mirR 18 2
-----GAACAGTGCCTTTCTGTGTAG----- mirR 21 1
-----AACAGTGCCTTTCTGTGT----- mirR 18 1
-----ATGAACAGTGCCTTTCTGTGTA----- mirR 22 1
-----CAGTGCCTTTCTGTGTAGGG----- mirR 20 1

```

```
-----TGAACAGTGCCTTTCTGTGTAG----- mirR 22 1
-----AGGGTAATGTGCAACATG morR 18 22
-----TAGGGTAATGTGCAACATG morR 19 2
-----GTAGGGTAATGTGCAACA-- morR 18 1
```

>mmu-mir-3109

```
TGGCTCTCTGCCTGCTCCTGTAAATGGATGCGATGGTTCCCATGCTGTTCTGAGGCAGAGCTAGGGCCATCTCATCCAGATACTGTGGAGATGGTACAAGG species len reads
TGGCTCTCTGCCTGCTCCT----- morL 19 2
TGGCTCTCTGCCTGCTCCTGTA----- morL 22 1
TGGCTCTCTGCCTGCTCCTGT----- morL 21 1
-----AATGGATGCGATGGTTCCCATGC----- mirL 23 88
-----AATGGATGCGATGGTTCCCATGCT----- mirL 24 83
-----AATGGATGCGATGGTTCCCATG----- mirL 22 12
-----AATGGATGCGATGGTTCCCATGCTG----- mirL 25 9
-----AAATGGATGCGATGGTTCCCATGC----- mirL 24 7
-----AATGGATGCGATGGTTCCCATGCTGTT----- mirL 27 3
-----AATGGATGCGATGGTTCCCAT----- mirL 21 3
-----AATGGATGCGATGGTTCCCA----- mirL 20 3
-----ATGGATGCGATGGTTCCC----- mirL 18 1
-----TGCTGTTCTGAGGCAGAG----- loop 18 3
-----CTGTTCTGAGGCAGAGCT----- loop 18 1
-----GCTGTTCTGAGGCAGAGC----- loop 18 1
-----TGCTGTTCTGAGGCAGAGCT----- loop 20 1
-----TGCTGTTCTGAGGCAGAGC----- loop 19 1
-----TAGGGCCATCTCATCCAGATA----- mirR 21 86
-----TAGGGCCATCTCATCCAGA----- mirR 19 14
-----TAGGGCCATCTCATCCAGAT----- mirR 20 8
-----CTAGGGCCATCTCATCCAGAT----- mirR 21 8
-----CTAGGGCCATCTCATCCAGATAC----- mirR 23 7
-----TAGGGCCATCTCATCCAGATAC----- mirR 22 6
-----TAGGGCCATCTCATCCAGATACT----- mirR 23 4
-----TAGGGCCATCTCATCCAGATACTGT----- mirR 25 1
-----CTAGGGCCATCTCATCCA----- mirR 18 1
-----ATACTGTGGAGATGGTAC---- morR 18 2
-----ACTGTGGAGATGGTACAA-- morR 18 1
-----ATACTGTGGAGATGGTACAAG- morR 21 1
-----CTGTGGAGATGGTACAAG- morR 18 1
-----TGTGGAGATGGTACAAGG morR 18 1
-----ATACTGTGGAGATGGTACA--- morR 19 1
```

>mmu-mir-3470a

```
ATAGAGCCCTGGCTGTCCTGGACTCACTTTGTAGACCAGGCTGGCCTTAAATTCACAGAGATCAGCCTGCCTCTGCCTCCTGAGTGTGGGATTAAGGCATGGTAACC species len reads
----GCCCTGGCTGTCCTGGAC----- morL 18 14
----AGCCCTGGCTGTCCTGGAC----- morL 19 7
----AGCCCTGGCTGTCCTGGA----- morL 18 5
----GCCCTGGCTGTCCTGGACT----- morL 19 2
```

|                                        |       |      |    |    |
|----------------------------------------|-------|------|----|----|
| ATAGAGCCCTGGCTGTCCT                    | ----- | morL | 19 | 2  |
| -TAGAGCCCTGGCTGTCCT                    | ----- | morL | 18 | 1  |
| ---GAGCCCTGGCTGTCCTGGAC                | ----- | morL | 20 | 1  |
| ---AGCCCTGGCTGTCCTGGACT                | ----- | morL | 20 | 1  |
| -----ACTCACTTTGTAGACCAGGC              | ----- | mirL | 20 | 12 |
| -----ACTCACTTTGTAGACCAGGCTGG           | ----- | mirL | 23 | 10 |
| -----ACTCACTTTGTAGACCAGG               | ----- | mirL | 19 | 9  |
| -----ACTCACTTTGTAGACCAGGCT             | ----- | mirL | 21 | 5  |
| -----ACTCACTTTGTAGACCAGGCTGGC          | ----- | mirL | 24 | 5  |
| -----GGACTCACTTTGTAGACCAGGCTGGC        | ----- | mirL | 26 | 3  |
| -----ACTCACTTTGTAGACCAGGCTGGCCT        | ----- | mirL | 26 | 3  |
| -----CTCACTTTGTAGACCAGGC               | ----- | mirL | 19 | 3  |
| -----CTCACTTTGTAGACCAGGCTGGC           | ----- | mirL | 23 | 2  |
| -----CTCACTTTGTAGACCAGGCT              | ----- | mirL | 20 | 2  |
| -----ACTCACTTTGTAGACCAG                | ----- | mirL | 18 | 2  |
| -----CTCACTTTGTAGACCAGGCTGGCCTTA       | ----- | mirL | 27 | 2  |
| -----GGACTCACTTTGTAGACCAGGCT           | ----- | mirL | 23 | 1  |
| -----GGACTCACTTTGTAGACCAGGCTGGCCTTAA   | ----- | mirL | 31 | 1  |
| -----CACTTTGTAGACCAGGCTGGCCTTAAA       | ----- | mirL | 27 | 1  |
| -----GGACTCACTTTGTAGACCAGGCTGGCCTTAAA  | ----- | mirL | 32 | 1  |
| -----GGACTCACTTTGTAGACCAG              | ----- | mirL | 20 | 1  |
| -----TGGACTCACTTTGTAGACCAGGCT          | ----- | mirL | 24 | 1  |
| -----CTCACTTTGTAGACCAGGCTGG            | ----- | mirL | 22 | 1  |
| -----GGACTCACTTTGTAGACCAGGC            | ----- | mirL | 22 | 1  |
| -----TGGACTCACTTTGTAGACCAGGC           | ----- | mirL | 23 | 1  |
| -----GGCTGGCCTTAAATTCAC                | ----- | loop | 18 | 1  |
| -----GGCCTTAAATTCACAGAGA               | ----- | loop | 19 | 1  |
| -----AGATCAGCCTGCCTCTGCCTCC            | ----- | mirR | 22 | 84 |
| -----GATCAGCCTGCCTCTGCCTCC             | ----- | mirR | 21 | 48 |
| -----AGATCAGCCTGCCTCTGCCTC             | ----- | mirR | 21 | 26 |
| -----GATCAGCCTGCCTCTGCCTC              | ----- | mirR | 20 | 8  |
| -----GAGATCAGCCTGCCTCTGC               | ----- | mirR | 19 | 7  |
| -----GATCAGCCTGCCTCTGCCTCCTGA          | ----- | mirR | 24 | 5  |
| -----TCAGCCTGCCTCTGCCTCCTGAG           | ----- | mirR | 23 | 5  |
| -----AGATCAGCCTGCCTCTGCCTCCT           | ----- | mirR | 23 | 5  |
| -----GAGATCAGCCTGCCTCTGCC              | ----- | mirR | 20 | 5  |
| -----GATCAGCCTGCCTCTGCCTCCT            | ----- | mirR | 22 | 4  |
| -----ATCAGCCTGCCTCTGCCT                | ----- | mirR | 18 | 4  |
| -----AGATCAGCCTGCCTCTGC                | ----- | mirR | 18 | 3  |
| -----GAGATCAGCCTGCCTCTGCCTC            | ----- | mirR | 22 | 3  |
| -----TCAGCCTGCCTCTGCCTCCTGAGTGCT       | ----- | mirR | 27 | 2  |
| -----GATCAGCCTGCCTCTGCCT               | ----- | mirR | 19 | 1  |
| -----AGAGATCAGCCTGCCTCTGCC             | ----- | mirR | 21 | 1  |
| -----GAGATCAGCCTGCCTCTGCCTCC           | ----- | mirR | 23 | 1  |
| -----ATCAGCCTGCCTCTGCCTCCTGAGTGCTGGGAT | ----- | mirR | 33 | 1  |
| -----ATCAGCCTGCCTCTGCCTC               | ----- | mirR | 19 | 1  |

```

-----TCAGCCTGCCTCTGCCTC----- mirR 18 1
-----ATCAGCCTGCCTCTGCCTCCTGAGTGCTGGGATTA----- mirR 35 1
-----TCAGCCTGCCTCTGCCTCCTG----- mirR 21 1
-----GATCAGCCTGCCTCTGCC----- mirR 18 1
-----GAGTGCTGGGATTAAGGCATGG----- morR 23 4
-----CCTGAGTGCTGGGATTAAGGCATG----- morR 25 3
-----TGAGTGCTGGGATTAAGGCAT----- morR 22 3
-----GAGTGCTGGGATTAAGGCATG----- morR 22 2
-----GTGCTGGGATTAAGGCATGGT----- morR 22 2
-----TGAGTGCTGGGATTAAGGC----- morR 20 1
-----TGAGTGCTGGGATTAAGGCA----- morR 21 1
-----TGAGTGCTGGGATTAAG----- morR 18 1
-----GTGCTGGGATTAAGGCATGGTAACC morR 26 1
-----CCTGAGTGCTGGGATTAAGGCATGGTAACC morR 31 1
-----GAGTGCTGGGATTAAGGCATGGT----- morR 24 1
-----CCTGAGTGCTGGGATTA----- morR 18 1
-----TGAGTGCTGGGATTAAGGCATGG----- morR 24 1
-----CTGAGTGCTGGGATTA----- morR 18 1
-----CCTGAGTGCTGGGATTAAGGCATGGTAAC- morR 30 1
-----CTGAGTGCTGGGATTAAGGCATGG----- morR 25 1

>mmu-mir-344c
TTCTTCTGCAAGGGTTTTTTTCAGTCAGGCTGCTGGCTAGAGTACAGCTATCAGCTGGTACCTGATCTAGTCAAAGCCTGACAGTAAACTGCTCCAGAGAGGAAGA species len reads
-TCTTCTGCAAGGGTTTTTT----- morL 18 1
TTCTTCTGCAAGGGTTTTTT----- morL 20 1
-----GCAAGGGTTTTTTTCAGT----- morL 18 1
-----CTGCAAGGGTTTTTTTCA----- morL 18 1
-----AGTCAGGCTGCTGGCTAGAG----- mirL 20 5
-----GTCAGGCTGCTGGCTAGA----- mirL 18 4
-----AGTCAGGCTGCTGGCTAG----- mirL 18 4
-----AGTCAGGCTGCTGGCTAGA----- mirL 19 2
-----TTCAGTCAGGCTGCTGGC----- mirL 18 2
-----TTCAGTCAGGCTGCTGGCT----- mirL 19 1
-----TTCAGTCAGGCTGCTGGCTAG----- mirL 21 1
-----AGTCAGGCTGCTGGCTAGAGTAC----- mirL 23 1
-----CAGTCAGGCTGCTGGCTAG----- mirL 19 1
-----AGTCAGGCTGCTGGCTAGAGT----- mirL 21 1
-----GTCAGGCTGCTGGCTAGAG----- mirL 19 1
-----AGCTATCAGCTGGTACCT----- loop 18 1
-----TACAGCTATCAGCTGGTA----- loop 18 1
-----TGATCTAGTCAAAGCCTGACAGT----- mirR 23 181
-----GATCTAGTCAAAGCCTGACAGT----- mirR 22 86
-----TGATCTAGTCAAAGCCTGACA----- mirR 21 7
-----GATCTAGTCAAAGCCTGAC----- mirR 19 6
-----TGATCTAGTCAAAGCCTGACAGTAA----- mirR 25 5
-----TGATCTAGTCAAAGCCTGACAGTA----- mirR 24 5

```

```

-----TGATCTAGTCAAAGCCTGACAGTAAA----- mirR 26 3
-----GATCTAGTCAAAGCCTGACA----- mirR 20 2
-----TGATCTAGTCAAAGCCTGA----- mirR 19 2
-----TGATCTAGTCAAAGCCTGAC----- mirR 20 2
-----CTGATCTAGTCAAAGCCT----- mirR 18 1
-----CCTGATCTAGTCAAAGCCTGA----- mirR 21 1
-----ATCTAGTCAAAGCCTGAC----- mirR 18 1
-----GATCTAGTCAAAGCCTGACAGTAAA----- mirR 25 1
-----CTGATCTAGTCAAAGCCTGAC----- mirR 21 1
-----GATCTAGTCAAAGCCTGA----- mirR 18 1
-----GATCTAGTCAAAGCCTGACAGTAA----- mirR 24 1
-----AAACTGCTCCAGAGAGGAA-- morR 19 2
-----AACTGCTCCAGAGAGGAAGA morR 20 1
-----CTGCTCCAGAGAGGAAGA morR 18 1
-----GTAAACTGCTCCAGAGAG----- morR 18 1

```

>mmu-mir-669o

```

TTCCTCCATGCATGTGCATGTGTGTATAGTTGTGTGTGCATGTTTATGTGTGTATTTGAATATACATAACATACACACACACACGTATAAACACAAGCACACACACACAGACACAAGAATGACAC species len rea
-----ATGCATGTGCATGTGTGT----- morL 18 1
-----ATGCATGTGCATGTGTGTAT----- morL 20 1
-----TCCATGCATGTGCATGTGTGTAT----- morL 23 1
TTCCTCCATGCATGTGCATGTGTGTA----- morL 26 1
-----TCCATGCATGTGCATGTGTGTATA----- morL 24 1
-----AGTTGTGTGTGCATGTTTATGTGT----- mirL 24 77
-----AGTTGTGTGTGCATGTTTATGT----- mirL 22 37
-----GTTGTGTGTGCATGTTTATGTGT----- mirL 23 5
-----TGTGTGTGCATGTTTATGTGTG----- mirL 22 2
-----GTTGTGTGTGCATGTTTATG----- mirL 20 2
-----AGTTGTGTGTGCATGTTT----- mirL 18 1
-----TTGTGTGTGCATGTTTATGT----- mirL 20 1
-----AGTTGTGTGTGCATGTTTAT----- mirL 20 1
-----GTTGTGTGTGCATGTTTATGT----- mirL 21 1
-----ATAAACACAAGCACACACAC----- mirR 20 93
-----ATAAACACAAGCACACAC----- mirR 18 34
-----AACACAAGCACACACACACA----- mirR 20 21
-----TAAACACAAGCACACACAC----- mirR 19 12
-----AACACAAGCACACACACACAG----- mirR 21 5
-----AACACAAGCACACACACACAGACACA----- mirR 26 5
-----CGTATAAACACAAGCACACA----- mirR 18 4
-----AACACAAGCACACACACAC----- mirR 19 4
-----TATAAACACAAGCACACA----- mirR 18 3
-----TAAACACAAGCACACACACA----- mirR 18 3
-----TAAACACAAGCACACACACACA----- mirR 22 3
-----GTATAAACACAAGCACAC----- mirR 18 2
-----ATAAACACAAGCACACACAC----- mirR 22 2
-----AACACAAGCACACACACACAGACA----- mirR 24 2

```

```
-----AAACACAAGCACACACACAC----- mirR 20 2
-----AACACAAGCACACACACA----- mirR 18 2
-----AAACACAAGCACACACACACAGA----- mirR 23 1
-----AAACACAAGCACACACACACACA----- mirR 21 1
-----AACACAAGCACACACACACAGACAC----- mirR 25 1
-----AAACACAAGCACACACACACACAG----- mirR 22 1
-----TATAAACACAAGCACACACA----- mirR 20 1
-----ACAGACACAAGAATGACA----- morR 18 2
-----ACAGACACAAGAATGACAC----- morR 19 2
-----ACACAGACACAAGAATGA--- morR 18 1
```

>mmu-mir-467h

```
TAATTTTCACCTTTTGTCTCATGTATATGTGTATGTGTGCGGTGTACATAATTATATCTATGTGTGCATGTATGTGGACATAAGTGTGTGCATGTATATGTGTGTGTGGTGTACATAATTATATCTATGTGTGCAT
-----ACTTTTGTCTCATG-----
-----TTCACCTTTTGTCTC-----
-----ATTTTCACCTTTTGTCTC-----
-----TTCACCTTTTGTCTC-----
-----TTCACCTTTTGTCTC-----
-----ATTTTCACCTTTTGTCTC-----
-----TCACCTTTTGTCTCA-----
TAATTTTCACCTTTTGTCTC-----
-----AATTTTCACCTTTTGTCTC-----
-----TCACCTTTTGTCTCATG-----
-----ATGTATATGTGTATGTGTGCG-----
-----ATGTATATGTGTATGTGTGCG-----
-----CATGTATATGTGTATGTGTGCG-----
-----ATGTATATGTGTATGTGTGCG-----
-----CATGTATATGTGTATGTGTGCG-----
-----ATGTATATGTGTATGTGTGCG-----
-----TGTATATGTGTATGTGTGCGGT-----
-----GTATATGTGTATGTGTGCG-----
-----CATGTATATGTGTATGTGTGCG-----
-----ATGTATATGTGTATGTGTGCGGT-----
```

```

>mmu-mir-882
TGTGTCTTCCTTACAGCAGTACCAGGAGAGAGTTAGCGCATTAGTGCAATAGTTAGTCCTGATTTCTGGGTTTTTCTAATGGCTGCTCTTCAGGGGCTGCCACACAGAATGTTCTAGTACCCTGTGATCAGAGC specie
-----TCCTTACAGCAGTACCAG----- morL 1
---GTCTTCCTTACAGCAGTA----- morL 1
--TGTCTTCCTTACAGCAGT----- morL 1
TGTGTCTTCCTTACAGCAGTAC----- morL 2
-----AGGAGAGAGTTAGCGCATTAG----- mirL 2
-----AGGAGAGAGTTAGCGCATTAGT----- mirL 2
-----AGGAGAGAGTTAGCGCATT----- mirL 2
-----AGGAGAGAGTTAGCGCATT----- mirL 1
-----GGAGAGAGTTAGCGCATT----- mirL 1
-----GGAGAGAGTTAGCGCATTAG----- mirL 2
-----ACCAGGAGAGAGTTAGCG----- mirL 1
-----GGAGAGAGTTAGCGCATTAGT----- mirL 2
-----AGGAGAGAGTTAGCGCAT----- mirL 1
-----GGAGAGAGTTAGCGCATT----- mirL 1
-----CAGGAGAGAGTTAGCGCATTAG----- mirL 2
-----GAGAGAGTTAGCGCATTAG----- mirL 1
-----CTAGTACCCTGTGATCAG--- mirR 1
-----CTAGTACCCTGTGATCAGA-- mirR 1
-----TCTAGTACCCTGTGATCAG-- mirR 1
-----TCTAGTACCCTGTGATCAGA-- mirR 2
-----AGTACCCTGTGATCAGAGC mirR 1

```

```

>mmu-mir-1906-2
AGTGGGGACATTAGGAGCAACCTCCTAGGGTTGTTGTGAGAATTAATGAACTGCAGCAGCCTGAGGCAGGGCTGGGCAGAGACCTCAAAAAA species len reads
---GGGGACATTAGGAGCAAC----- morL 18 4
AGTGGGGACATTAGGAGC----- morL 18 1
-----ACCTCCTAGGGTTGTTGT----- mirL 18 4
-----AACCTCCTAGGGTTGTTG----- mirL 18 2
-----AACCTCCTAGGGTTGTTGT----- mirL 19 1
-----TCCTAGGGTTGTTGTGAGA----- mirL 19 1
-----CAACCTCCTAGGGTTGTTGTGA----- mirL 22 1
-----GTGAGAATTAATGAACT----- loop 18 2
-----TGCAGCAGCCTGAGGCAGGGCT----- mirR 22 198
-----TGCAGCAGCCTGAGGCAGGGC----- mirR 21 43
-----AGCAGCCTGAGGCAGGGCT----- mirR 19 37
-----CAGCAGCCTGAGGCAGGGCT----- mirR 20 10
-----GCAGCAGCCTGAGGCAGGGCTGGGCA----- mirR 26 3
-----AGCAGCCTGAGGCAGGGC----- mirR 18 3
-----TGCAGCAGCCTGAGGCAG----- mirR 18 2
-----GCAGCAGCCTGAGGCAGG----- mirR 18 2
-----GCAGCAGCCTGAGGCAGGGCT----- mirR 21 1
-----TGCAGCAGCCTGAGGCAGGGCTGGGC----- mirR 26 1
-----TGCAGCAGCCTGAGGCAGGG----- mirR 20 1

```

```

-----AGCAGCCTGAGGCAGGGCTGGGC----- mirR 23 1
-----TGCAGCAGCCTGAGGCAGGGCTG----- mirR 23 1
-----CTGCAGCAGCCTGAGGCA----- mirR 18 1
-----CTGGGCAGAGACCTCAAAA---- morR 18 1
-----GGGCAGAGACCTCAAAAA-- morR 18 1
-----GCTGGGCAGAGACCTCAA---- morR 18 1
-----GGCAGAGACCTCAAAAA- morR 18 1
-----CTGGGCAGAGACCTCAAAAA-- morR 20 1
-----GCAGAGACCTCAAAAAA morR 18 1

```

>mmu-mir-466b-3

```

ATTGCCCCGTGTATGTGTATATGTGTTGATGTGTGTGTACATGTACATGTGTGAATATGATATACAAAATACATACACGCACACATAAGAC species len reads
-TTGCCCCGTGTATGTGT----- morL 18 3
ATTGCCCCGTGTATGTGT----- morL 19 1
-----TATATGTGTTGATGTGTGTA----- mirL 22 1
-----AATACATACACGCACACATAAGA- mirR 23 80
-----AATACATACACGCACACATAA-- mirR 21 75
-----AATACATACACGCACACATAAG-- mirR 22 70
-----AATACATACACGCACACATA--- mirR 20 22
-----AATACATACACGCACACAT---- mirR 19 18
-----CAAATACATACACGCACACAT--- mirR 21 12
-----AAATACATACACGCACACATAA--- mirR 22 10
-----AATACATACACGCACACATAAGAC mirR 24 7
-----AAATACATACACGCACACATA---- mirR 21 4
-----AATACATACACGCACACA----- mirR 18 4
-----CAAATACATACACGCACAC----- mirR 19 3
-----CAAATACATACACGCACACATA--- mirR 22 3
-----AAATACATACACGCACAC----- mirR 18 3
-----ACAAATACATACACGCAC----- mirR 18 2
-----ACAAATACATACACGCACACAT---- mirR 22 1
-----CAAATACATACACGCACA----- mirR 18 1
-----AAATACATACACGCACACATAAGAC mirR 25 1
-----AAATACATACACGCACACATAAG-- mirR 23 1
-----CAAATACATACACGCACACATAA--- mirR 23 1

```

>mmu-mir-3108

```

GGACGTGAGACACAACCAGGGTCTCTAAAGCTAGACGTTCCGGAGAATTTTTTATTTTCGGCGTCTAGGTCTAGAGTCTCAAGGA species len reads
GGACGTGAGACACAACCA----- morL 18 1
---GTGAGACACAACCAGGGTC----- morL 19 1
---CGTGAGACACAACCAGGG----- morL 18 1
--ACGTGAGACACAACCAGGG----- morL 19 1
---TGAGACACAACCAGGGTC----- morL 18 1
-----GTCTCTAAAGCTAGACGTTCCGGA----- mirL 24 95
-----GTCTCTAAAGCTAGACGTTCCGG----- mirL 23 45
-----AGGGTCTCTAAAGCTAGACGTTCC----- mirL 24 39
-----GTCTCTAAAGCTAGACGTTCCGGAG----- mirL 25 20

```



```

-----GTCTCTAAAGCTAGACGTTCCG----- mirL 22 18
-----GTCTCTAAAGCTAGACGTTCCGGAGA----- mirL 26 12
-----AGGGTCTCTAAAGCTAGACGTT----- mirL 22 10
-----CTCTAAAGCTAGACGTTCCG----- mirL 20 4
-----AGGGTCTCTAAAGCTAGACGTT----- mirL 23 4
-----AGGGTCTCTAAAGCTAGACGTTCCG----- mirL 25 2
-----GTCTCTAAAGCTAGACGTT----- mirL 20 2
-----GTCTCTAAAGCTAGACGTTCC----- mirL 21 2
-----AGGGTCTCTAAAGCTAGACGTT----- mirL 21 1
-----TCTAAAGCTAGACGTTCC----- mirL 18 1
-----GGAGAATTTTTTTTATTT----- loop 18 1
-----AGAATTTTTTTTATTTCCG----- loop 18 1
-----CGGCGTCTAGGTCTAGAG----- mirR 18 14
-----GGCGTCTAGGTCTAGAGTCTC----- mirR 21 10
-----CGTCTAGGTCTAGAGTCTCAAGG----- mirR 23 8
-----GGCGTCTAGGTCTAGAGTCTCA----- mirR 22 7
-----CGGCGTCTAGGTCTAGAGTCTCA----- mirR 23 6
-----GGCGTCTAGGTCTAGAGTCT----- mirR 20 4
-----CGTCTAGGTCTAGAGTCT----- mirR 18 3
-----CGGCGTCTAGGTCTAGAGTCTC----- mirR 22 2
-----GGCGTCTAGGTCTAGAGT----- mirR 18 2
-----TCGGCGTCTAGGTCTAGA----- mirR 18 1
-----CGTCTAGGTCTAGAGTCTCAAGGA----- mirR 24 1
-----GCGTCTAGGTCTAGAGTCT----- mirR 19 1
-----CGTCTAGGTCTAGAGTCTCAAG----- mirR 22 1

```

>mmu-mir-3098

```

CCACACATTGTGGTTGGGAGGAGTCTAACAGCAGGAGTAGGAGCTCTGATTATCCCCTGCTTCTGCTGCCTGCCTTTAGGACCCCTTTCCCACAAACCG species len reads
-CACACATTGTGGTTGGGAGGAG----- morL 22 17
--ACACATTGTGGTTGGGAG----- morL 18 4
CCACACATTGTGGTTGGGAG----- morL 20 2
--CATGTGGTTGGGAGGAG----- morL 18 2
--ACACATTGTGGTTGGGAG----- morL 19 1
--TTGTGGTTGGGAGGAGTC----- morL 18 1
-----TCCTAACAGCAGGAGTAGGAGC----- mirL 22 65
-----CCTAACAGCAGGAGTAGGAGC----- mirL 21 15
-----TCCTAACAGCAGGAGTAGGAGCT----- mirL 23 11
-----TCCTAACAGCAGGAGTAGGAG----- mirL 21 6
-----TCCTAACAGCAGGAGTAG----- mirL 18 4
-----CTAACAGCAGGAGTAGGAG----- mirL 19 2
-----TCCTAACAGCAGGAGTAGGAGCTC----- mirL 24 2
-----GTCCTAACAGCAGGAGTAG----- mirL 19 1
-----CTAACAGCAGGAGTAGGA----- mirL 18 1
-----CCTAACAGCAGGAGTAGGA----- mirL 19 1
-----CCTAACAGCAGGAGTAGGAG----- mirL 20 1
-----CTGATTATCCCCTGCTTC----- loop 18 2

```

```

-----TCTGATTATCCCCTGCTTC----- loop 19 1
-----GCTCTGATTATCCCCTGC----- loop 18 1
-----AGCTCTGATTATCCCCTGC----- loop 19 1
-----TTCTGCTGCCTGCCTTTAGGACC----- mirR 23 61
-----TTCTGCTGCCTGCCTTTAGGAC----- mirR 22 32
-----TTCTGCTGCCTGCCTTTAGGACCC----- mirR 24 25
-----TCTGCTGCCTGCCTTTAGGACC----- mirR 22 18
-----TTCTGCTGCCTGCCTTTAGGA----- mirR 21 12
-----TCTGCTGCCTGCCTTTAGGAC----- mirR 21 10
-----TCTGCTGCCTGCCTTTAGGACCC----- mirR 23 4
-----TTCTGCTGCCTGCCTTTAGGACCCTTTC----- mirR 28 2
-----GCTTCTGCTGCCTGCCTT----- mirR 18 2
-----CTGCTGCCTGCCTTTAGGA----- mirR 19 1
-----TGCTTCTGCTGCCTGCCT----- mirR 18 1
-----TTCTGCTGCCTGCCTTTAGGACCCT----- mirR 25 1
-----CTTCTGCTGCCTGCCTTTA----- mirR 19 1
-----CTTCTGCTGCCTGCCTTT----- mirR 18 1
-----CTGCTGCCTGCCTTTAGG----- mirR 18 1
-----ACCCTTTCCCCACAACCG morR 18 1

```

>mmu-mir-3085

```

CCAACAGTCCCAACTCTGGGAAGGTGCCATTCCGAGGGCCAAGAGTCTGAATATGAGTCACTCTGGCTGCTATGGCCCCCTCCAGGGCTTGGGCATCACAT species len reads
----AGTCCCAACTCTGGGAAG----- morL 18 3
---ACAGTCCCAACTCTGGGA----- morL 18 2
---CAGTCCCAACTCTGGGAAG----- morL 19 1
--AACAGTCCCAACTCTGGG----- morL 18 1
--CAACAGTCCCAACTCTGGGA----- morL 20 1
--CAACAGTCCCAACTCTGG----- morL 18 1
CCAACAGTCCCAACTCTG----- morL 18 1
-----AGGTGCCATTCCGAGGGCCAAGAGT----- mirL 25 58
-----AGGTGCCATTCCGAGGGCCAAGA----- mirL 23 9
-----AGGTGCCATTCCGAGGGC----- mirL 18 2
-----AAGGTGCCATTCCGAGGGCC----- mirL 20 1
-----TCTGAATATGAGTCACTC----- loop 18 62
-----TCTGAATATGAGTCACTCT----- loop 19 2
-----AGTCTGAATATGAGTCACT----- loop 19 1
-----TCTGGCTGCTATGGCCCCCTCC----- mirR 22 67
-----TCTGGCTGCTATGGCCCCCTC----- mirR 21 44
-----TCTGGCTGCTATGGCCCCCT----- mirR 20 20
-----TCTGGCTGCTATGGCCCCCTCCC----- mirR 23 16
-----TGGCTGCTATGGCCCCCTCC----- mirR 20 4
-----CTGGCTGCTATGGCCCCCTCC----- mirR 21 4
-----TCTGGCTGCTATGGCCCCCTCCA----- mirR 24 4
-----TGGCTGCTATGGCCCCCT----- mirR 18 3
-----CTGGCTGCTATGGCCCCCTCC----- mirR 22 1
-----CTGGCTGCTATGGCCCCCT----- mirR 19 1

```

```
-----AGGGCTTGGGCATCACAT morR 18 2
-----CCAGGGCTTGGGCATCAC-- morR 18 1
-----TCCAGGGCTTGGGCATCA--- morR 19 1

>mmu-mir-465a
AGGCTTTGTATGCAGTGCCCTATTTAGAATGGCACTGATGTGATAAAAATAAAAAATTGATCAGGGCCTTTCTAAGTAGAGTAAGGCTTACCACCTTCTACGTTTAATGACTTGTAGATGGATATTCAG species len
--GCTTTGTATGCAGTGCCCTATTTAGAATGGCACTGATGTGATAAAAATAAAAAATTGATCAGGGCCTTTCTAAGTAGAGTAAGGCTTACCACCTTCTACGTTTAATGACTTGTAGATGGATATTCAG morL 18 1
AGGCTTTGTATGCAGTGCCCTATTTAGAATGGCACTGATGTGATAAAAATAAAAAATTGATCAGGGCCTTTCTAAGTAGAGTAAGGCTTACCACCTTCTACGTTTAATGACTTGTAGATGGATATTCAG morL 18 1
-----TATTTAGAATGGCACTGATG----- mirL 20 166
-----TATTTAGAATGGCACTGAT----- mirL 19 37
-----TATTTAGAATGGCACTGATGTGA----- mirL 23 31
-----TATTTAGAATGGCACTGA----- mirL 18 21
-----ATTTAGAATGGCACTGATG----- mirL 19 12
-----TATTTAGAATGGCACTGATGT----- mirL 21 7
-----ATTTAGAATGGCACTGATGTGA----- mirL 22 7
-----TATTTAGAATGGCACTGATGTGAT----- mirL 24 5
-----TTAGAATGGCACTGATGTGA----- mirL 20 4
-----TATTTAGAATGGCACTGATGTGATA----- mirL 25 4
-----ATTTAGAATGGCACTGATGTGATA----- mirL 24 3
-----CTATTTAGAATGGCACTGATG----- mirL 21 1
-----TTAGAATGGCACTGATGTG----- mirL 19 1
-----TTTAGAATGGCACTGATGT----- mirL 19 1
-----ACTTGTAGATGGATATTC-- mirR 18 8
-----ACTTGTAGATGGATATTCAG mirR 20 1
-----GACTTGTAGATGGATATTC-- mirR 19 1
-----CTTGTAGATGGATATTC-- mirR 18 1

>mmu-mir-705
CCCCTCCATGTCCCAGTAGTGGTGGGAGGTGGGGTGGGCACAGAGGGAATGACTTCTTTCTCCTGCAGTCTCCCTACCTCCCTAACATGAAACCCCTCCAGGTTGGGGTTTGGGGCTGCTC species len read
---ACTCCATGTCCCAGTAGTG----- morL 19 3
---ACTCCATGTCCCAGTAGTGGT----- morL 21 1
CCCCTCCATGTCCCAGT----- morL 18 1
---TCCATGTCCCAGTAGTGGT----- morL 19 1
-----GGTGGGAGGTGGGGTGGGCA----- mirL 20 186
-----GGTGGGAGGTGGGGTGGG----- mirL 18 11
-----GGTGGGAGGTGGGGTGGGC----- mirL 19 5
-----GGGAGGTGGGGTGGGCAC----- mirL 18 5
-----GTGGTGGGAGGTGGGGTGGGCACAGAGG----- mirL 29 4
-----GTGGGAGGTGGGGTGGGC----- mirL 18 4
-----TGGGAGGTGGGGTGGGCAC----- mirL 19 3
-----GGTGGGAGGTGGGGTGGGCACAGAG----- mirL 25 2
-----TGGTGGGAGGTGGGGTGG----- mirL 18 1
-----TGGTGGGAGGTGGGGTGGGCA----- mirL 21 1
-----GTGGTGGGAGGTGGGGTGGGCACAGAGGGAAT----- mirL 32 1
-----GGGAGGTGGGGTGGGCACA----- mirL 19 1
-----TCCCTAACATGAAACCCCT----- mirR 18 41
```

```

-----ACCTCCCTAACATGAAAC----- mirR 18 1
-----CTCCCTAACATGAAACCC----- mirR 18 1
-----TCCCTAACATGAAACCCTCC----- mirR 20 1
-----CAGGTTGGGGTTTGGGGC----- morR 18 9
-----TCCAGGTTGGGGTTTGGG----- morR 18 3
-----AGGTTGGGGTTTGGGGCT----- morR 18 2
-----CCAGGTTGGGGTTTGGGG----- morR 18 2
-----CCTCCAGGTTGGGGTTTGGG----- morR 20 1
-----CAGGTTGGGGTTTGGGGCT----- morR 19 1
-----AGGTTGGGGTTTGGGGCTGCTC morR 22 1

```

>mmu-mir-1906-1

```

AGTGGGGACATTAGGAGCAACCTCCTAGGGTTGTTGTGAGAATTAATGAACTGCAGCAGCCTGAGGCAGGGCTGGGCAGAGACCTCAGCACATGTTTGTGAAAGGTTTGCAGGTGGATCTAG species len re
---GGGGACATTAGGAGCAAC----- morL 18 4
AGTGGGGACATTAGGAGC----- morL 18 1
-----ACCTCCTAGGGTTGTTGT----- mirL 18 4
-----AACCTCCTAGGGTTGTTG----- mirL 18 2
-----AACCTCCTAGGGTTGTTGT----- mirL 19 1
-----TCCTAGGGTTGTTGTGAGA----- mirL 19 1
-----CAACCTCCTAGGGTTGTTGTGA----- mirL 22 1
-----AAAGGTTTGCAGGTGGAT----- mirL 18 208
-----AAAGGTTTGCAGGTGGATC----- mirL 19 52
-----AAAGGTTTGCAGGTGGATCT-- mirR 20 8
-----GGTTTGCAGGTGGATCTA-- mirR 18 2
-----AAAGGTTTGCAGGTGGATCTAG mirR 22 1
-----GAAAGGTTTGCAGGTGGATC-- mirR 20 1
-----AAAGGTTTGCAGGTGGATCTA-- mirR 21 1
-----AAGGTTTGCAGGTGGATC-- mirR 18 1
-----AAGGTTTGCAGGTGGATCT-- mirR 19 1
-----GAAAGGTTTGCAGGTGGA----- mirR 18 1
-----GAAAGGTTTGCAGGTGGATCTAG mirR 23 1

```

>mmu-mir-3095

```

CCCAGAGCCCTGTGCACAAGCTTTCTCATCTGTGACACTCGAGATGGTTTCAGGGAGTGGACACTGGAGAGAGAGCTTTTGCAAGTCGCTCCTCATGCCTTG species len reads
-----GCCCTGTGCACAAGCTTT----- morL 18 4
-----CCCTGTGCACAAGCTTT----- morL 18 2
CCCAGAGCCCTGTGCACAAG----- morL 20 1
-----TCTCATCTGTGACACTCG----- mirL 18 44
-----CATCTGTGACACTCGAGAT----- mirL 19 6
-----CATCTGTGACACTCGAGA----- mirL 18 5
-----CATCTGTGACACTCGAGATG----- mirL 20 2
-----TTCTCATCTGTGACACTCGAGA----- mirL 22 2
-----TTCTCATCTGTGACACTC----- mirL 18 1
-----TTTCTCATCTGTGACACT----- mirL 18 1
-----TCGAGATGGTTTCAGGGA----- loop 18 1
-----AGATGGTTTCAGGGAGTGG----- loop 19 1

```

C:\Documents and Settings\hong\Desktop\Reprogramming-total RNA.txt

```
-----TGGACACTGGAGAGAGAGCTTTT----- mirR 23 95
-----TGGACACTGGAGAGAGAGCTTT----- mirR 22 31
-----TGGACACTGGAGAGAGAGCTTTTG----- mirR 24 27
-----GTGGACACTGGAGAGAGAGCTTTTGC----- mirR 26 16
-----GTGGACACTGGAGAGAGAGCTTTT----- mirR 24 10
-----TGGACACTGGAGAGAGAGCTTTTGC----- mirR 25 7
-----GTGGACACTGGAGAGAGAGCTTTTG----- mirR 25 6
-----TGGACACTGGAGAGAGAGCTT----- mirR 21 3
-----ACACTGGAGAGAGAGCTTT----- mirR 19 2
-----GAGTGGACACTGGAGAGAG----- mirR 19 2
-----GGACACTGGAGAGAGAGC----- mirR 18 2
-----GGACACTGGAGAGAGAGCTTT----- mirR 22 1
-----GAGTGGACACTGGAGAGA----- mirR 18 1
-----GGACACTGGAGAGAGAGCTTT----- mirR 21 1
-----TGGACACTGGAGAGAGAGCTTTTGCAAG----- mirR 28 1
-----GGACACTGGAGAGAGAGCT----- mirR 19 1
-----GACACTGGAGAGAGAGCTT----- mirR 19 1
-----TGGACACTGGAGAGAGAGCT----- mirR 20 1
-----AGTGGACACTGGAGAGAG----- mirR 18 1
-----GTGGACACTGGAGAGAGA----- mirR 18 1
-----GCAAGTCGCTCCTCATGC----- morR 18 8
-----TGCAAGTCGCTCCTCATGC----- morR 19 1
-----AGTCGCTCCTCATGCCTTG morR 19 1
```

>mmu-mir-1898

```
ATAGGTCAAGGTTTCACAGGGGATCAAGAAATATTATTCTTGTATAATCTGTTTACTTTGACCTAAATACTAGCTTTTTAAATACTAACTCTGGCATAAAATATTGCTGTAATGGCAGCTCATTG species len re
--AGGTCAAGGTTTCACAGGGGATC----- mirL 22 144
---GGTCAAGGTTTCACAGGGGATC----- mirL 21 55
---GTCAAGGTTTCACAGGGGATC----- mirL 20 21
---GGTCAAGGTTTCACAGGGGAT----- mirL 20 14
--AGGTCAAGGTTTCACAGGGGAT----- mirL 21 12
----TCAAGGTTTCACAGGGGATC----- mirL 19 8
ATAGGTCAAGGTTTCACAG----- mirL 18 7
--AGGTCAAGGTTTCACAGGG----- mirL 18 6
---GGTCAAGGTTTCACAGGGGA----- mirL 19 3
-TAGGTCAAGGTTTCACAGGGGAT----- mirL 22 2
--AGGTCAAGGTTTCACAGGGGA----- mirL 20 2
--AGGTCAAGGTTTCACAGGGG----- mirL 19 2
-TAGGTCAAGGTTTCACAGGGGATC----- mirL 23 2
ATAGGTCAAGGTTTCACAGG----- mirL 19 1
-----GTAAATGGCAGCTCATTG mirR 18 7
```

>mmu-mir-3074-2

```
TCCTAGGGGGCTGGACTCCTGTCTGCTGTAAGTCTGAGCCAGTGCAGTGGAACTCAACTGTTTCAGCTCAGTAGGCACGGGAGGCGGAGCCCGGAGAGAGGCAGAGCCCTGCCAGCCAGGAGGCAGAGCGGGTGGG speci
----AGGGGGCTGGACTCCTGT----- morL
TCCTAGGGGGCTGGACTC----- morL
```

```

-----GGGGGCTGGACTCCTGTT----- morL
-----GTTTCCTGCTGAACTGAGCCAGT----- mirL
-----TGTTTCCTGCTGAACTGAGCCAG----- mirL
-----TGTTTCCTGCTGAACTGAGCCAGT----- mirL
-----GTTTCCTGCTGAACTGAGCCAGTGCAC----- mirL
-----TTCCTGCTGAACTGAGCC----- mirL
-----TGTTTCCTGCTGAACTGAG----- mirL
-----TGTTTCCTGCTGAACTGAGCC----- mirL
-----GTTTCCTGCTGAACTGAGCCAGTGC----- mirL
-----TCCTGCTGAACTGAGCCAG----- mirL
-----TTCCTGCTGAACTGAGCCAGTG----- mirL
-----TCCTGCTGAACTGAGCCAGT----- mirL
-----CTGTTTCCTGCTGAACTGA----- mirL
-----TTCCTGCTGAACTGAGCCAGT----- mirL
-----CCTGTTTCCTGCTGAACTGA----- mirL
-----CCTGCTGAACTGAGCCAGTG----- mirL
-----GAGGCAGAGCCCTGCCAG----- mirR
-----GAGGCAGAGCCCTGCCAGC----- mirR
-----AGGCAGAGCCCTGCCAGC----- mirR
-----AGGCAGAGCCCTGCCAGCC----- mirR
-----AGAGAGGCAGAGCCCTGC----- mirR
-----GCAGAGCCCTGCCAGCCA----- mirR
-----GAGAGGCAGAGCCCTGCCA----- mirR
-----GAGAGGCAGAGCCCTGCC----- mirR
-----AGAGGCAGAGCCCTGCCAG----- mirR
-----CAGGAGGCAGAGCAGGGTGG----- morR
-----AGGAGGCAGAGCAGGGTGG----- morR
-----AGCCAGGAGGCAGAGCAG----- morR
-----GGAGGCAGAGCAGGGTGG----- morR
-----AGGAGGCAGAGCAGGGTGG----- morR
-----GGAGGCAGAGCAGGGTGGG----- morR
-----CCAGGAGGCAGAGCAGGG----- morR

```

>mmu-mir-3077

| Sequence                                                                                                 | species | len | reads |
|----------------------------------------------------------------------------------------------------------|---------|-----|-------|
| GCGGGAGGGCGGGCGGGCCTGCGGACGGGTGGGCGGGCAGGCCAAATGGCGCGCCGAGGCTGACTCCCTGCTTCTCCGACAGCTGCCCGCTCCTGCTGCGGGTC | morL    | 18  | 3     |
| GCGGGAGGGCGGGCGGGC                                                                                       | morL    | 19  | 3     |
| GCGGGAGGGCGGGCGGGC                                                                                       | morL    | 18  | 1     |
| GGGCGGGCGGGCCTGCG                                                                                        | morL    | 18  | 1     |
| GAGGGCGGGCGGGCCTG                                                                                        | morL    | 18  | 1     |
| AGGGCGGGCGGGCCTGC                                                                                        | morL    | 18  | 1     |
| AGGGCGGGCGGGCCTGCG                                                                                       | morL    | 19  | 1     |
| GCGGACGGGTGGGCGGGC                                                                                       | mirL    | 18  | 4     |
| CCTGCGGACGGGTGGGCGGGCAGGCC                                                                               | mirL    | 26  | 2     |
| CTGCGGACGGGTGGGCGGGCAGGCCAAA                                                                             | mirL    | 28  | 1     |
| GACGGGTGGGCGGGCAGG                                                                                       | mirL    | 18  | 1     |
| GGCCAAATGGCGCGCCGA                                                                                       | loop    | 19  | 1     |

```
-----GCCAAATGGCGCGCCCGA----- loop 18 1
-----CTGACTCCCTGCTTCTCCGCAGA----- mirR 23 123
-----TGACTCCCTGCTTCTCCGCAGA----- mirR 22 48
-----CTGACTCCCTGCTTCTCCGCAG----- mirR 22 23
-----CTGACTCCCTGCTTCTCCGCA----- mirR 21 20
-----CTGACTCCCTGCTTCTCCGCAGAC----- mirR 24 16
-----CTGACTCCCTGCTTCTCCGC----- mirR 20 6
-----CTGACTCCCTGCTTCTCCGCAGACC----- mirR 25 4
-----AGGCTGACTCCCTGCTT----- mirR 18 3
-----TGACTCCCTGCTTCTCCGCAGAC----- mirR 23 3
-----CTGACTCCCTGCTTCTCCG----- mirR 19 2
-----TGACTCCCTGCTTCTCCGCA----- mirR 20 1
-----TGACTCCCTGCTTCTCCGCAGACC----- mirR 24 1
-----TGACTCCCTGCTTCTCCGCAGACCT----- mirR 25 1
-----GACTCCCTGCTTCTCCGCAG----- mirR 21 1
-----TGACTCCCTGCTTCTCCGCAG----- mirR 21 1
-----ACCTGCCCGCTCCTGCTG----- morR 18 2
-----GCCCGCTCCTGCTGCGGGT----- morR 19 1
-----GCCCGCTCCTGCTGCGGGTC----- morR 20 1
-----CTGCCCGCTCCTGCTGCGG----- morR 19 1
-----GACCTGCCCGCTCCTGCT----- morR 18 1

>mmu-mir-1962
TAGTCAGTCAGTGGTCCCATCTGTCTGCCTCTCTCTCGTTTCAGTTTCCATGGAGAGGCTGGCACTGGGACACATGACTGATGGTATGCTCCCCGCTGCAGTCCCCTCTGAGTGCCTGGGCCTTGGGATATCCTTGTCTT
---TCAGTCAGTGGTCCCATC-----
TAGTCAGTCAGTGGTCCC-----
-----TCTGTCTGCCTCTCTCTC-----
-----ATCTGTCTGCCTCTCTCTC-----
-----TGTCGCCTCTCTCTCGTTCA-----
-----GTCTGCCTCTCTCTCGTTC-----
-----CTTGGGATATCCTTGTTC-----
-----TGGGATATCCTTGTCTT-----
-----GGCCTTGGGATATCCTTGT-----
-----GGCCTTGGGATATCCTTG-----

>mmu-mir-669k
ACCAGCATGGGATTCATCTTATGCCACCAAAAAATGTGCATGTGTGTATAGTTGTGTGCATATTCACCTTCTCTATATGAATATGCATATACACGCATGCAAACACATTCATAGGAATGGCCAGAGCTATATCTCAGTTAGG
--CAGCATGGGATTCATCTT-----
ACCAGCATGGGATTCATC-----
-----GCCACCAAAAAATGTGCA-----
-----TATGCCACCAAAAAATGT-----
-----TCTTATGCCACCAAAAA-----
-----AGG-----
-----G-----
```

-----GG  
-----GG  
-----AGG  
-----AGG  
-----  
-----  
-----

>mmu-mir-2861

GGCGGAGGCTCCTCTGCAGCTCCGGCTCCCCCTGGCCTCCCGGAACTACAAGTCCCAGGGGGCCTGGCGGCGGGCGGAGACCAGGAGGCGGGCTCGGCACCTCGAGGCCGGAAGTGGCCGTGGAGGCGGAAG spec  
GGCGGAGGCTCCTCTGCA----- morL  
GGCGGAGGCTCCTCTGCAG----- morL  
--CGGAGGCTCCTCTGCAG----- morL  
-----TCCGGCTCCCCCTGGCCT----- mirL  
-----GCTCCGGCTCCCCCTGGC----- mirL  
-----GCTCCGGCTCCCCCTGGCC----- mirL  
-----CTCCGGCTCCCCCTGGCCT----- mirL  
-----TCCGGCTCCCCCTGGCCTC----- mirL  
-----GGCTCCCCCTGGCCTCCC----- mirL  
-----AGTGGCCGTGGAGGCGGA----- mirR  
-----AAGTGGCCGTGGAGGCGGA----- mirR  
-----AGTGGCCGTGGAGGCGGAA----- mirR  
-----GTGGCCGTGGAGGCGGAA----- mirR  
-----AAGTGGCCGTGGAGGCGGAA----- mirR  
-----AGTGGCCGTGGAGGCGGAAG----- mirR  
-----GGAAGTGGCCGTGGAGGC----- mirR  
-----GAAGTGGCCGTGGAGGCGGA----- mirR  
-----TGGCCGTGGAGGCGGAAG----- mirR

>mmu-mir-3105

|                                                                                                           | species | len | reads |
|-----------------------------------------------------------------------------------------------------------|---------|-----|-------|
| AAGAAAGCTGAGCAGGCTCTGGAGAGCAAGCCCGTAAGCAGCGTAAGTTACTGAGGAACACTGCTTATGAGCTTGCCTCCATAGCCTCTGCTTCCACTCCTGCCT | morL    | 18  | 2     |
| -----GCTGAGCAGGCTCTGGAG-----                                                                              | morL    | 19  | 1     |
| AAGAAAGCTGAGCAGGCTC-----                                                                                  | morL    | 18  | 1     |
| -----CTGAGCAGGCTCTGGAGA-----                                                                              | mirL    | 22  | 103   |
| -----AGAGCAAGCCCGTAAGCAGCGT-----                                                                          | mirL    | 24  | 24    |
| -----AGAGCAAGCCCGTAAGCAGCGTAA-----                                                                        | mirL    | 23  | 24    |
| -----AGAGCAAGCCCGTAAGCAGCGT-----                                                                          | mirL    | 18  | 9     |
| -----GGAGAGCAAGCCCGTAAG-----                                                                              | mirL    | 25  | 7     |
| -----AGAGCAAGCCCGTAAGCAGCGTAAAG-----                                                                      | mirL    | 22  | 7     |
| -----GAGAGCAAGCCCGTAAGCAGCG-----                                                                          | mirL    | 21  | 5     |
| -----AGAGCAAGCCCGTAAGCAGCG-----                                                                           | mirL    | 21  | 3     |
| -----GAGCAAGCCCGTAAGCAGCGT-----                                                                           | mirL    | 23  | 1     |
| -----GAGCAAGCCCGTAAGCAGCGTAA-----                                                                         | mirL    | 20  | 1     |
| -----TGGAGAGCAAGCCCGTAAGC-----                                                                            |         |     |       |



```

-----AGAGCAAGCCCGTAAGCAGC----- mirL 20 1
-----AGCAAGCCCGTAAGCAGCGTAA----- mirL 22 1
-----AGCAAGCCCGTAAGCAGCGTAA----- mirL 23 1
-----GAGCAAGCCCGTAAGCAGCG----- mirL 20 1
-----TAAGTTACTGAGGAACAC----- loop 18 1
-----CGTAAGTTACTGAGGAACAC----- loop 20 1
-----ACTGCTTATGAGCTTGCACTCC----- mirR 22 34
-----ACTGCTTATGAGCTTGCACTC----- mirR 21 6
-----TGCTTATGAGCTTGCACTCCATAG----- mirR 24 5
-----ACTGCTTATGAGCTTGCACT----- mirR 20 4
-----ACTGCTTATGAGCTTGCACTCCA----- mirR 23 2
-----CTGCTTATGAGCTTGCACTCCA----- mirR 22 2
-----CTGCTTATGAGCTTGCACTCCATAGC----- mirR 26 1
-----TGCTTATGAGCTTGCACTCCATA----- mirR 23 1
-----ACTGCTTATGAGCTTGCACTCCAT----- mirR 24 1
-----ACTGCTTATGAGCTTGCACT----- mirR 19 1
-----GCCTCTGCTTCCACTCCT---- morR 18 3
-----TAGCCTCTGCTTCCACTC----- morR 18 2
-----GCCTCTGCTTCCACTCCTG--- morR 19 1
-----GCCTCTGCTTCCACTCCTGCCT morR 22 1
-----AGCCTCTGCTTCCACTCC----- morR 18 1

>mmu-mir-3113
CACTAGCATCTCTGGCCCTGGCCCGGGTCCTGGCCCTGGTCCGGGTCTGGCCCTGGTCTGGCCCTGGTCTGGTCTGGCCCTGGCCCTGGCCCTGGCCCG species len reads
CACTAGCATCTCTGGCCC----- morL 18 1
-----CATCTCTGGCCCTGGCCC----- morL 18 1
-----CCCGGGTCCTGGCCCTGG----- mirL 18 154
-----GCCCGGGTCCTGGCCCTG----- mirL 18 2
-----GGCCCGGGTCCTGGCCCT----- mirL 18 1
-----CCCTGGTCTGGTCTGGCCCT----- mirR 22 30
-----CCCTGGTCTGGTCTGGCCC----- mirR 21 14
-----CCCTGGTCTGGTCTGGCCCTGGC----- mirR 25 11
-----CCCTGGTCTGGTCTGGCC----- mirR 20 8
-----CCCTGGTCTGGTCTGGCCCTGG----- mirR 24 7
-----CCCTGGTCTGGTCTGGCCCTG----- mirR 23 7
-----TGGCCCTGGTCTGGTCTGGCC----- mirR 24 5
-----CCCTGGTCTGGTCTGG----- mirR 18 2
-----CCTGGTCTGGTCTGGCCC----- mirR 20 1
-----TGGTCTGGTCTGGCCCTGGCC----- mirR 23 1
-----GGCCCTGGTCTGGTCT----- mirR 18 1
-----CCTGGTCTGGTCTGGCC----- mirR 18 1
-----CTGGTCTGGTCTGGCC----- mirR 18 1
-----CCTGGTCTGGTCTGGCCCTGGCCCTGGCC----- mirR 32 1
-----CTGGCCCTGGCCCTGGCC--- morR 18 3
-----GGCCCTGGCCCTGGCCCG--- morR 18 2
-----GCCCTGGCCCTGGCCCG morR 18 1

```

```

-----CCTGGCCCTGGCCCTGGC----- morR 18 1

>mmu-mir-711
GGACCCTCGTCCCATGTTCCCTAACTTTGAATCTCTTCTTAGGGTGCTTCAGGCAAAGCTGGGGACCCGGGGAGAGATGTAAGTCTGGGGAGATGTCAAGGT species len reads
-GACCCTCGTCCCATGTTTC----- morL 18 6
GGACCCTCGTCCCATGTTCT----- morL 21 1
-----ACTTTGAATCTCTTCTTA----- mirL 18 3
-----CTTTGAATCTCTTCTTAGGG----- mirL 20 1
-----AACTTTGAATCTCTTCTT----- mirL 18 1
-----TAGGGTGCTTCAGGCAAAG----- loop 19 7
-----GGGTGCTTCAGGCAAAGC----- loop 18 2
-----TAGGGTGCTTCAGGCAAAGC----- loop 20 2
-----TGCTTCAGGCAAAGCTGG----- loop 18 1
-----AGGGTGCTTCAGGCAAAG----- loop 18 1
-----GTGCTTCAGGCAAAGCTGG----- loop 19 1
-----GGGACCCGGGGAGAGATGTAA----- mirR 21 50
-----GGGACCCGGGGAGAGATGTAAG----- mirR 22 43
-----GACCCGGGGAGAGATGTAA----- mirR 19 20
-----GGGACCCGGGGAGAGATGT----- mirR 19 19
-----ACCCGGGGAGAGATGTAA----- mirR 18 16
-----GACCCGGGGAGAGATGTAAG----- mirR 20 15
-----GGACCCGGGGAGAGATGTAA----- mirR 20 14
-----ACCCGGGGAGAGATGTAAG----- mirR 19 8
-----GGGGACCCGGGGAGAGATGT----- mirR 20 4
-----GGACCCGGGGAGAGATGTAAG----- mirR 21 3
-----GGGACCCGGGGAGAGATGTA----- mirR 20 3
-----CTGGGGACCCGGGGAGAGA----- mirR 19 3
-----GACCCGGGGAGAGATGTA----- mirR 18 1
-----GGGGACCCGGGGAGAGAT----- mirR 18 1
-----GGACCCGGGGAGAGATGT----- mirR 18 1
-----ACCCGGGGAGAGATGTAAGT----- mirR 20 1
-----TGGGGACCCGGGGAGAGAT----- mirR 19 1
-----TGGGGACCCGGGGAGAGA----- mirR 18 1
-----AGTCTGGGGAGATGTCAA----- morR 18 3
-----TAAGTCTGGGGAGATGTC----- morR 18 2
-----GTCTGGGGAGATGTCAAGG----- morR 19 1
-----AAGTCTGGGGAGATGTCA----- morR 18 1
-----CTGGGGAGATGTCAAGGT----- morR 18 1

>mmu-mir-344g
AGAATTTCTGCCAGTCAGGCTCCTGGCAGGAGTCCTGTCTCAGCTGGTTCAGGCTCTAGCCAGGGGCTTGACTGCAAGCTGCTCATCGAGAAGGA species len reads
-GAATTTCTGCCAGTCAGG----- morL 18 2
-----TTCTGCCAGTCAGGCTCC----- morL 18 1
AGAATTTCTGCCAGTCAG----- morL 18 1
-----TCCTGGCAGGAGTCCTGC----- mirL 18 3
-----CCTGGCAGGAGTCCTGCT----- mirL 18 3

```

```

-----CTGGCAGGAGTCCTGCTC----- mirL 18 2
-----CCTGGCAGGAGTCCTGCTC----- mirL 19 1
-----TGGCAGGAGTCCTGCTCTC----- mirL 19 1
-----CTCCTGGCAGGAGTCCTGCT----- mirL 20 1
-----CTCCTGGCAGGAGTCCTG----- mirL 18 1
-----CAGCTGGTTCCAGGCTCT----- loop 18 1
-----CTCTCAGCTGGTTCCAGG----- loop 18 1
-----CTCTCAGCTGGTTCCAGGCTCT----- loop 22 1
-----TCTCAGCTGGTTCCAGGC----- loop 18 1
-----TAGCCAGGGGCTTGACTGCAA----- mirR 21 39
-----CTAGCCAGGGGCTTGACTGCAA----- mirR 22 34
-----TAGCCAGGGGCTTGACTGCAAG----- mirR 22 27
-----TAGCCAGGGGCTTGACTGCAAGC----- mirR 23 18
-----TCTAGCCAGGGGCTTGACTGCAA----- mirR 23 17
-----CTCTAGCCAGGGGCTTGACTGCA----- mirR 23 16
-----TAGCCAGGGGCTTGACTGCA----- mirR 20 15
-----TAGCCAGGGGCTTGACTGCAAGCT----- mirR 24 12
-----CTAGCCAGGGGCTTGACTGCA----- mirR 21 9
-----TCTAGCCAGGGGCTTGACTGCA----- mirR 22 8
-----CTAGCCAGGGGCTTGACTGC----- mirR 20 4
-----CTCTAGCCAGGGGCTTGACTGC----- mirR 22 2
-----AGCCAGGGGCTTGACTGCAAGC----- mirR 22 2
-----GCCAGGGGCTTGACTGCAAGC----- mirR 21 1
-----CTAGCCAGGGGCTTGACT----- mirR 18 1
-----CTAGCCAGGGGCTTGACTGCAAGC----- mirR 24 1
-----CTCTAGCCAGGGGCTTGACTGCAAG----- mirR 25 1
-----TAGCCAGGGGCTTGACTGC----- mirR 19 1
-----CTCTAGCCAGGGGCTTGACTGCAA----- mirR 24 1
-----GCTGCTCATCGAGAAGGA morR 18 1

```

>mmu-mir-3069

| Species                                                                                                     | len | reads |
|-------------------------------------------------------------------------------------------------------------|-----|-------|
| GATCCACCAACAGTCAGAGAAGCTTGCCAGTCAAGATATTGTTTAGCAGACGGAGCGGTTTCTGTTGGACACTAAGTACTGCCACAAAACCTCGAGCGACTAAGCGT | 39  | 1     |
| -----CAACAGTCAGAGAAGCTTG-----                                                                               | 19  | 3     |
| -----ACAGTCAGAGAAGCTTGG-----                                                                                | 18  | 1     |
| GATCCACCAACAGTCAGAGAAG-----                                                                                 | 22  | 1     |
| -----CCACCAACAGTCAGAGAAG-----                                                                               | 19  | 1     |
| -----TGGCAGTCAAGATATTGTTTAGC-----                                                                           | 23  | 6     |
| -----TGGCAGTCAAGATATTGTTTAGCA-----                                                                          | 24  | 5     |
| -----TGGCAGTCAAGATATTGT-----                                                                                | 18  | 4     |
| -----TTGGCAGTCAAGATATTGTTTAGC-----                                                                          | 24  | 3     |
| -----TGGCAGTCAAGATATTGTT-----                                                                               | 19  | 3     |
| -----TTGGCAGTCAAGATATTGTTTAG-----                                                                           | 23  | 2     |
| -----TGGCAGTCAAGATATTGTTTAGCAG-----                                                                         | 25  | 1     |
| -----GGCAGTCAAGATATTGTT-----                                                                                | 18  | 1     |
| -----TTGGCAGTCAAGATATTGTT-----                                                                              | 21  | 1     |
| -----TGGCAGTCAAGATATTGTT-----                                                                               | 20  | 1     |

```

-----AGACGGAGCGGTTTCTGT----- loop 18 6
-----AGCAGACGGAGCGGTTTC----- loop 18 2
-----GCAGACGGAGCGGTTTCT----- loop 18 1
-----GCAGACGGAGCGGTTTCTG----- loop 19 1
-----GACGGAGCGGTTTCTGTTG----- loop 19 1
-----TTGGACACTAAGTACTGCCACA----- mirR 22 98
-----GTTGGACACTAAGTACTG----- mirR 18 27
-----TTGGACACTAAGTACTGCCACAA----- mirR 23 23
-----TGGACACTAAGTACTGCCACAA----- mirR 22 5
-----TTGGACACTAAGTACTGC----- mirR 18 2
-----CTGTTGGACACTAAGTAC----- mirR 18 2
-----TGTGGACACTAAGTACTGCCACAA----- mirR 25 2
-----GGACACTAAGTACTGCCA----- mirR 18 2
-----GGACACTAAGTACTGCCACAA----- mirR 21 2
-----TTGGACACTAAGTACTGCCAC----- mirR 21 2
-----TGGACACTAAGTACTGCCACA----- mirR 21 2
-----TTGGACACTAAGTACTGCCA----- mirR 20 2
-----TGGACACTAAGTACTGCCAC----- mirR 20 1
-----TTGGACACTAAGTACTGCC----- mirR 19 1
-----TGTGGACACTAAGTACTGCCACA----- mirR 24 1
-----GTTGGACACTAAGTACTGCCACA----- mirR 23 1
-----GGACACTAAGTACTGCCACAAAA----- mirR 23 1
-----GACACTAAGTACTGCCAC----- mirR 18 1
-----TGTGGACACTAAGTACT----- mirR 18 1
-----GACACTAAGTACTGCCACA----- mirR 19 1
-----CCTCGAGCGACTAAGCGT----- morR 18 2
-----AACCTCGAGCGACTAAGC----- morR 18 1

```

>mmu-mir-1199

```

AAGCCTGCGCCGGAGCCGGGTCTGAGTCCCGGTCGCGCGGGCGAGGAACTCATGAGTTGCGCGTGCGGCCGGTGCTCAGTCGGCCCCGGTCCGGTACTCCGCTGCGCGCGCC species len reads
----CTGCGCCGGAGCCGGGT----- morL 18 4
----TGCGCCGGAGCCGGGT----- morL 18 2
----TGCGCCGGAGCCGGGTCT----- morL 19 2
----CTGCGCCGGAGCCGGGT----- morL 19 2
AAGCCTGCGCCGGAGCCG----- morL 18 1
-AGCCTGCGCCGGAGCCG----- morL 18 1
--CCTGCGCCGGAGCCGGGT----- morL 19 1
-----TCTGAGTCCCGGTCGCGCG----- mirL 20 45
-----TCTGAGTCCCGGTCGCGCGGCGA----- mirL 24 35
-----TCTGAGTCCCGGTCGCGCGGGCG----- mirL 23 22
-----GTCTGAGTCCCGGTCGCGCGGGCG----- mirL 24 18
-----TCTGAGTCCCGGTCGCGCGGGCGAG----- mirL 25 10
-----TCTGAGTCCCGGTCGCGCG----- mirL 19 9
-----TCTGAGTCCCGGTCGCGC----- mirL 18 9
-----TCTGAGTCCCGGTCGCGCGGC----- mirL 22 6
-----CTGAGTCCCGGTCGCGCG----- mirL 18 5

```

```

-----CTGAGTCCCGGTCGCGCGG----- mirL 19 4
-----CTGAGTCCCGGTCGCGCGGC----- mirL 21 1
-----GGGTCTGAGTCCCGGTCG----- mirL 18 1
-----CTGAGTCCCGGTCGCGCGGGCG----- mirL 22 1
-----GTCTGAGTCCCGGTCGCGCGGG----- mirL 22 1
-----CTGAGTCCCGGTCGCGCGGG----- mirL 20 1
-----CTGAGTCCCGGTCGCGCGGGCGAG----- mirL 24 1
-----CAGTCGGCCCCGGCTCCGG----- mirR 18 27
-----CAGTCGGCCCCGGCTCCGGT----- mirR 19 2
-----TCGGCCCCGGCTCCGGTAC----- mirR 18 2
-----CAGTCGGCCCCGGCTCCGGTAC----- mirR 21 1
-----TCAGTCGGCCCCGGCTCCGG----- mirR 19 1
-----TACTCCGCTGCCGCGCGCC morR 19 1

```

>mmu-mir-3064

```

TTGTCTAACTTTTTATTTTTGGTCTGGCTGTTGTGGTGTGCAAAACTCCGTACATTGCTATTTTGCCACACTGCAACACCTTACAGATGTGGAAGAT species len reads
TTGTCTAACTTTTTATTTTT----- morL 20 1
---TCTAACTTTTTATTTTTG----- morL 18 1
-TGTCTAACTTTTTATTTTT----- morL 19 1
-----TCTGGCTGTTGTGGTGTGCAA----- mirL 21 8
-----TCTGGCTGTTGTGGTGTGCAAAA----- mirL 23 4
-----TCTGGCTGTTGTGGTGTGC----- mirL 19 4
-----TGGCTGTTGTGGTGTGCAAAACT----- mirL 23 3
-----TGGTCTGGCTGTTGTGGT----- mirL 18 2
-----TCTGGCTGTTGTGGTGTGCAA----- mirL 22 2
-----GGCTGTTGTGGTGTGCAA----- mirL 18 1
-----CTGGCTGTTGTGGTGTGCAAAA----- mirL 22 1
-----GGTCTGGCTGTTGTGGTGTGCA----- mirL 22 1
-----CTGGCTGTTGTGGTGTGC----- mirL 18 1
-----TGGCTGTTGTGGTGTGCAAAA----- mirL 21 1
-----TGGCTGTTGTGGTGTGCAAAACTCCGT----- mirL 27 1
-----TGGCTGTTGTGGTGTGCAAAACTCC----- mirL 25 1
-----AACTCCGTACATTGCTAT----- loop 18 1
-----ATTTTGCCACACTGCAAC----- mirR 18 50
-----TTTGCCACACTGCAACACCTTA----- mirR 22 46
-----TTGCCACACTGCAACACCTTACA----- mirR 23 20
-----TTTGCCACACTGCAACACCTTAC----- mirR 23 13
-----TTTGCCACACTGCAACACCTT----- mirR 21 11
-----TTGCCACACTGCAACACCTTAC----- mirR 22 11
-----TTTGCCACACTGCAACACCT----- mirR 20 8
-----TTTTGCCACACTGCAACACC----- mirR 20 7
-----GCTATTTTGCCACACTGCAACACCTTAC----- mirR 28 1
-----CTATTTTGCCACACTGCAACACCTT----- mirR 25 1
-----TATTTTGCCACACTGCAAC----- mirR 19 1
-----ATTTTGCCACACTGCAACA----- mirR 19 1
-----TTGCCACACTGCAACACCTTA----- mirR 21 1

```

```

-----TTTGGCCACACTGCAACA----- mirR 18 1
-----TATTTGGCCACACTGCAACACCTT----- mirR 24 1
-----TTTGGCCACACTGCAACACCTTACA----- mirR 24 1
-----ACACCTTACAGATGTGGA----- morR 18 3
-----ACACCTTACAGATGTGGA----- morR 19 1
-----CACCTTACAGATGTGGAAG----- morR 19 1
-----CTTACAGATGTGGAAGAT----- morR 18 1
-----CCTTACAGATGTGGAAGA----- morR 18 1
-----ACCTTACAGATGTGGAAG----- morR 18 1

>mmu-mir-1895
CAGGGCACGCAGACCCACACCTTTTCTCTTCTTCTTGGCCGGTTGGCTCCGCCAGCTCCCCCGAGGAGGACGAGGAGGAGGAGGAATGATTCTGCGGGCAG species len reads
CAGGGCACGCAGACCCCA----- morL 18 8
CAGGGCACGCAGACCCAC----- morL 19 1
--GGGCACGCAGACCCACA----- morL 18 1
-----ACCTTTTCTCTTCTTCT----- mirL 18 3
-----CCTTTTCTCTTCTTCT----- mirL 18 3
-----TTTTCTCTTCTTCTTGGC----- mirL 19 2
-----CACCTTTTCTCTTCTTCT----- mirL 18 2
-----CTTTTCTCTTCTTCTTGG----- mirL 18 2
-----CCTTTTCTCTTCTTCTTGG----- mirL 20 1
-----CACACCTTTTCTCTTCT----- mirL 18 1
-----ACACCTTTTCTCTTCT----- mirL 18 1
-----TTTTCTCTTCTTCTTGGCC----- mirL 20 1
-----CCCCCGAGGAGGACGAGGAGGA----- mirR 22 103
-----TCCCCCGAGGAGGACGA----- mirR 18 21
-----CCCCCGAGGAGGACGAGGA----- mirR 19 19
-----CCCCCGAGGAGGACGAGGAG----- mirR 21 7
-----CCCCGAGGAGGACGAGGAGGA----- mirR 21 6
-----CCCCCGAGGAGGACGAGGAG----- mirR 20 4
-----CCCGAGGAGGACGAGGAGGA----- mirR 20 3
-----CCCCCGAGGAGGACGAG----- mirR 18 3
-----CCCCCGAGGAGGACGAGGAGGA----- mirR 23 2
-----CTCCCCCGAGGAGGACG----- mirR 18 2
-----CCGAGGAGGACGAGGAGGA----- mirR 19 2
-----CCCCCGAGGAGGACGAGGAG----- mirR 23 2
-----CCCGAGGAGGACGAGGAG----- mirR 19 2
-----CCCGAGGAGGACGAGGAGGAGGA----- mirR 26 1
-----CCCGAGGAGGACGAGGAG----- mirR 18 1
-----TCCCCCGAGGAGGACGAGGAG----- mirR 23 1
-----CCCCGAGGAGGACGAGGAG----- mirR 20 1
-----CCGAGGAGGACGAGGAGGAG----- mirR 23 1
-----CCCCCGAGGAGGACGAG----- mirR 19 1
-----TCCCCCGAGGAGGACGAG----- mirR 19 1
-----GAGGAATGATTCTGCGGG----- morR 18 2
-----GGAATGATTCTGCGGGCAG----- morR 19 1

```

```

-----GAGGAGGAATGATTCTGC----- morR 18 1
-----GGAATGATTCTGCGGGCA- morR 18 1
-----AGGAATGATTCTGCGGGC-- morR 18 1

>mmu-mir-344f
CCTGAAGAGAGGGGTTTTGCCAGTCAGTCTCCTGGCTGGAGTCCAGCTCTAAGCTGGTTCCAGGCTCTAGCCAGGACCTGACTACAACCTACTTAGCAGTGAAGGA species len reads
CCTGAAGAGAGGGGTTTT----- morL 18 2
---AAGAGAGGGGTTTTGCCA----- morL 18 1
--TGAAGAGAGGGGTTTTGC----- morL 18 1
--GAAGAGAGGGGTTTTGCC----- morL 18 1
-----AGTCAGTCTCCTGGCTGGAGTCC----- mirL 23 31
-----CAGTCAGTCTCCTGGCTGGAGTC----- mirL 23 11
-----AGTCAGTCTCCTGGCTGGAGTCCA----- mirL 24 6
-----AGTCAGTCTCCTGGCTGGAGTC----- mirL 22 5
-----AGTCAGTCTCCTGGCTGGAGTCCAG----- mirL 25 2
-----AGTCAGTCTCCTGGCTGGAGTC----- mirL 21 1
-----TCAGTCTCCTGGCTGGAG----- mirL 18 1
-----GCCAGTCAGTCTCCTGGC----- mirL 18 1
-----GTCAGTCTCCTGGCTGGAG----- mirL 19 1
-----CAGTCAGTCTCCTGGCTGGGA----- mirL 20 1
-----AGTCAGTCTCCTGGCTGGAGTCCAGC----- mirL 26 1
-----CCAGTCAGTCTCCTGGCT----- mirL 18 1
-----TCAGTCTCCTGGCTGGAGTC----- mirL 20 1
-----TCTAAGCTGGTTCCAGGC----- loop 18 2
-----CAGCTCTAAGCTGGTTCC----- loop 18 1
-----CTCTAGCCAGGACCTGACTAC----- mirR 21 62
-----CTCTAGCCAGGACCTGACTACA----- mirR 22 39
-----CTCTAGCCAGGACCTGACTACAA----- mirR 23 9
-----TAGCCAGGACCTGACTAC----- mirR 18 5
-----CTCTAGCCAGGACCTGACT----- mirR 19 4
-----TCTAGCCAGGACCTGACTAC----- mirR 20 3
-----CTAGCCAGGACCTGACTAC----- mirR 19 3
-----AGGCTCTAGCCAGGACCT----- mirR 18 1
-----CTAGCCAGGACCTGACTA----- mirR 18 1
-----GCTCTAGCCAGGACCTGA----- mirR 18 1
-----TCTAGCCAGGACCTGACT----- mirR 18 1
-----CTCTAGCCAGGACCTGAC----- mirR 18 1
-----AACCTACTTAGCAGTGAA--- morR 18 9
-----ACCTACTTAGCAGTGAAG-- morR 18 2
-----CTACTTAGCAGTGAAGGA morR 18 1
-----CAACCTACTTAGCAGTGA---- morR 18 1

```

```

>mmu-mir-669j
ATGAGTTAGAGTTCAGCATGCGATTGATGTGATGTCCACCAAGAATGTGCATGTGTGTATAGTTGTGTACATATTCACCTTTTGTATATGAATATGCATATACTCACATGCAAACATA species len reads
-----TTAGAGTTCAGCATGCGA----- morL 18 1
-----AGAGTTCAGCATGCGATT----- morL 18 1

```

```

ATGAGTTAGAGTTCAGCAT-----ATTCATGTGATGTCCACCA-----mirL 19 1
-----TTCATGTGATGTCCACCA-----mirL 19 6
-----GCGATTTCATGTGATGTCC-----mirL 18 5
-----GCGATTTCATGTGATGTCCAC-----mirL 18 1
-----ATTCATGTGATGTCCACC-----mirL 20 1
-----CGATTTCATGTGATGTCCA-----mirL 18 1
-----GCGATTTCATGTGATGTCCACC-----mirL 21 1
-----TTCATGTGATGTCCACCAA-----mirL 19 1
-----GCGATTTCATGTGATGTCCACCA-----mirL 19 1
-----CGATTTCATGTGATGTCCAC-----mirL 22 1
-----TGCATATACTCACATGCAAAC---mirL 19 1
-----TGCATATACTCACATGCAAACA--mirR 21 57
-----ATATACTCACATGCAAACA--mirR 22 34
-----TATGCATATACTCACATGCAA---mirR 19 21
-----TGCATATACTCACATGCAA---mirR 22 18
-----TATGCATATACTCACATGCAAAC---mirR 20 10
-----CATATACTCACATGCAAACA--mirR 23 7
-----TGCATATACTCACATGCAA---mirR 20 5
-----GCATATACTCACATGCAAACA--mirR 19 4
-----ATATACTCACATGCAAAC---mirR 21 3
-----TGCATATACTCACATGCAAACATA mirR 18 3
-----TATGCATATACTCACATG---mirR 24 3
-----GCATATACTCACATGCAAAC---mirR 18 2
-----ATATGCATATACTCACATGCA-----mirR 20 2
-----TGCATATACTCACATGCAAACAT- mirR 21 1
-----ATGCATATACTCACATGC-----mirR 23 1
-----TATGCATATACTCACATGCAA-----mirR 18 1
-----ATATGCATATACTCACATGC-----mirR 21 1
-----ATGCATATACTCACATGCAA-----mirR 20 1
-----TGCATATACTCACATGCA-----mirR 20 1
-----TGCATATACTCACATGCA-----mirR 18 1

>mmu-mir-1907
CCGGTGCCCCCTCCCCCTCCCAGCCCCACTCCCCCTCGCTGTCTCTTGCTGGCTGATTTTAATTCTCTCTACCAGGAGCAGCAGAGGATCTGGAGGTGGCTGGACCCGAGGGGCCG species len reads
---TGCCCCCTCCCCCTCCCA-----morL 18 9
CCGGTGCCCCCTCCCCCT-----morL 18 1
-CGGTGCCCCCTCCCCCTC-----morL 18 1
-----TCCCAGCCCCACTCCCC-----mirL 18 4
-----CAGCCCCACTCCCCCTCGCT-----mirL 20 2
-----CCCAGCCCCACTCCCCCTC-----mirL 19 1
-----AGCCCCACTCCCCCTCGC-----mirL 18 1
-----CCCAGCCCCACTCCCCCT-----mirL 18 1
-----GAGCAGCAGAGGATCTGGAGGT-----mirR 22 137
-----GAGCAGCAGAGGATCTGGAGG-----mirR 21 16
-----GAGCAGCAGAGGATCTGGAG-----mirR 20 7
-----GAGCAGCAGAGGATCTGG-----mirR 18 3

```



```

-----AGCAGCAGAGGATCTGGAGGT----- mirR 21 2
-----AGCAGCAGAGGATCTGGA----- mirR 18 2
-----AGCAGCAGAGGATCTGGAGG----- mirR 20 1
-----GGGAGCAGCAGAGGATCT----- mirR 18 1
-----GAGCAGCAGAGGATCTGGAGGTGGC----- mirR 25 1
-----GCAGCAGAGGATCTGGAGGT----- mirR 20 1
-----GAGCAGCAGAGGATCTGGAGGT----- mirR 23 1
-----GGAGCAGCAGAGGATCTGGAGGT----- mirR 23 1
-----GGAGCAGCAGAGGATCTG----- mirR 18 1
-----GTGGCTGGACCCGAGGG----- morR 18 2
-----GCTGGACCCGAGGGGCCG morR 19 1
-----GGTGGCTGGACCCGAGGG----- morR 18 1

```

>mmu-mir-3081

```

GCTCGAGCGCTGGGCTGGGGCTCAGACTGGAGCTTGGAGCGGTGAGCTGGACTCGGGCTTGCCTCCGATCTCTGAGCTGGGCTCTTGCCCGAATCCC species len reads
---CGAGCGCTGGGCTGGGGC----- morL 18 3
---CGAGCGCTGGGCTGGGGCT----- morL 19 1
GCTCGAGCGCTGGGCTGGGG----- morL 20 1
---GAGCGCTGGGCTGGGGCT----- morL 18 1
-----AGACTGGAGCTTGGAGCGGTGAG----- mirL 23 18
-----AGACTGGAGCTTGGAGCGGTGAGC----- mirL 24 13
-----AGACTGGAGCTTGGAGCGGTGA----- mirL 22 2
-----TCAGACTGGAGCTTGGAG----- mirL 18 1
-----AGACTGGAGCTTGGAGCGG----- mirL 19 1
-----CTGGAGCTTGGAGCGGTGAG----- mirL 20 1
-----AGACTGGAGCTTGGAGCG----- mirL 18 1
-----CAGACTGGAGCTTGGAGC----- mirL 18 1
-----CTGGAGCTTGGAGCGGTG----- mirL 18 1
-----GAGCTGGACTCGGGCTTG----- loop 18 1
-----TTGCGCTCCGATCTCTGAGCTGG----- mirR 23 67
-----TTGCGCTCCGATCTCTGAGCTGG----- mirR 24 29
-----GCGCTCCGATCTCTGAGC----- mirR 18 22
-----TTGCGCTCCGATCTCTGAGCTGGG----- mirR 25 7
-----TTGCGCTCCGATCTCTGAGCTG----- mirR 22 6
-----TTGCGCTCCGATCTCTGAGCTGGGCT----- mirR 26 4
-----GCGCTCCGATCTCTGAGCT----- mirR 19 3
-----TGCGCTCCGATCTCTGAGCTGGGCT----- mirR 25 2
-----TTGCGCTCCGATCTCTGAG----- mirR 19 2
-----TTGCGCTCCGATCTCTGAGCT----- mirR 21 1
-----TGCGCTCCGATCTCTGAGCTGG----- mirR 22 1
-----GGGCTCTTGCCCGAATCC----- morR 19 5
-----TGGGCTCTTGCCCGAAT----- morR 18 1
-----GGCTCTTGCCCGAATCCC morR 19 1

```

>mmu-mir-3073

```

GCCAAAGCTGTTCTGCCAGTGGTACAGTTGGCGCCAGCCCTAGAGTCTAGATGGGTTGATGTCCACTGTGACCATAGTGCAGGCCAGCAGGAGGCCAGGTGGAGGGGGTTACGCATCCAGGGTCACA species

```

```

-CCAAAGCTGTTCTGCCC----- morL 18
GCCAAAGCTGTTCTGCCC----- morL 18
----AAGCTGTTCTGCCAGT----- morL 18
-----GTGGTCACAGTTGGCGCCAGCC----- mirL 22
-----GTGGTCACAGTTGGCGCCAGCCC----- mirL 23
-----AGTGGTCACAGTTGGCGCCAGC----- mirL 22
-----GTCACAGTTGGCGCCAGCC----- mirL 19
-----GTGGTCACAGTTGGCGCCAG----- mirL 20
-----AGTGGTCACAGTTGGCGCCAG----- mirL 21
-----AGTGGTCACAGTTGGCGCCA----- mirL 20
-----AGTGGTCACAGTTGGCGCCAGCC----- mirL 23
-----GTGGTCACAGTTGGCGCCA----- mirL 19
-----GTGGTCACAGTTGGCGCCAGCCCTA----- mirL 25
-----GTGGTCACAGTTGGCGCC----- mirL 18
-----AGGCCAGGTGGAGGGGGG----- mirR 18
-----AGGCCAGGTGGAGGGGGGT----- mirR 19
-----GGCCAGGTGGAGGGGGGT----- mirR 18
-----GGCCAGGTGGAGGGGGGTT----- mirR 19
-----GAGGCCAGGTGGAGGGGGG----- mirR 19
-----CCAGGTGGAGGGGGGTTC----- mirR 18
-----AGGAGGCCAGGTGGAGGGGGGT----- mirR 22
-----GGAGGCCAGGTGGAGGGG----- mirR 18
-----GGAGGCCAGGTGGAGGGGG----- mirR 20
-----AGGAGGCCAGGTGGAGGG----- mirR 18
-----GTTTCAGCATCCCAGGGTC----- morR 18
-----GGTTCAGCATCCCAGGGT----- morR 18
-----CAGCATCCCAGGGTCACA----- morR 18
-----TTCAGCATCCCAGGGTCAC----- morR 19

```

>mmu-mir-467b

```

TGCATATACATACACACACCAACACACACA species len reads
---ATATACATACACACACCAACAC----- mirR 22 45
---TATACATACACACACCAACAC----- mirR 21 36
---TATACATACACACACCAACACA----- mirR 22 17
---ATACATACACACACCAAC----- mirR 18 13
---ATATACATACACACCAACA----- mirR 21 13
---TATACATACACACCAACA----- mirR 20 12
---ATACATACACACACCAACA----- mirR 19 8
---ATATACATACACACCAAC----- mirR 20 5
---ATACATACACACACCAACAC----- mirR 20 5
---ATACATACACACCAACACAC----- mirR 22 5
---ATACATACACACACCAACACA----- mirR 21 4
---ATATACATACACACCA----- mirR 18 4
---CATATACATACACACCAACA----- mirR 22 3
---CATATACATACACACCAA----- mirR 20 3
---CATATACATACACACCAAC----- mirR 21 3

```

```

-----TACATACACACACCAACA----- mirR 18 3
TGCATATACATACACACACCA----- mirR 21 2
----TATACATACACACACCAAC----- mirR 19 2
-----TACATACACACACCAACACACACA mirR 24 1
-GCATATACATACACACACCAAC----- mirR 22 1
-----TACATACACACACCAACACACA---- mirR 20 1
----ATACATACACACACCAACACACA-- mirR 23 1
---ATATACATACACACACCAA----- mirR 19 1
---TATACATACACACACCAA----- mirR 18 1

```

>mmu-mir-1904

```

GTCACGTTGACTGCAAGTTAGCTGTTCTGCTCCTCTGGAGGGAGGTTTCCTGTTTGCACACCTCTCTCAGGTAGATTAAACATTTTATTGCAAAACCAAC species len reads
GTCACGTTGACTGCAAGTTA----- morL 20 1
-----GTTCTGCTCCTCTGGAGGGAGG----- mirL 22 38
-----GTTCTGCTCCTCTGGAGGGAG----- mirL 21 16
-----GTTCTGCTCCTCTGGAGGG----- mirL 19 3
-----CTGTTCTGCTCCTCTGGA----- mirL 18 2
-----GTTCTGCTCCTCTGGAGGGA----- mirL 20 2
-----TTCTGCTCCTCTGGAGGGA----- mirL 19 2
-----TCTGCTCCTCTGGAGGGA----- mirL 18 1
-----CTGTTCTGCTCCTCTGGAG----- mirL 19 1
-----TTCTGCTCCTCTGGAGGG----- mirL 18 1
-----TTCTGCTCCTCTGGAGGGAGG----- mirL 21 1
-----TTCTGCTCCTCTGGAGGGAGGTT----- mirL 23 1
-----TTCTGCTCCTCTGGAGGGAGGT----- mirL 22 1
-----GTTCTGCTCCTCTGGAGGGAGGT----- mirL 23 1
-----AGGTTCTGTTTGCACAC----- loop 18 1
-----CTGTTTGCACACCTCTCT----- loop 18 1
-----TTCCTGTTTGCACACCTC----- loop 18 1
-----TCTTCAGGTAGATTAAAC----- mir 18 81
-----CTCTCTCAGGTAGATTA----- mirR 18 1
-----ATTTTATTGCAAAACCA-- morR 18 15
-----CATTTTATTGCAAAACCA-- morR 19 6
-----ACATTTTATTGCAAAAC--- morR 18 4
-----ATTTTATTGCAAAACCAA- morR 19 1
-----TTTTATTGCAAAACCAA- morR 18 1
-----ACATTTTATTGCAAAACC--- morR 19 1
-----AACATTTTATTGCAAAA---- morR 18 1
-----TTTATTGCAAAACCAAC morR 18 1

```

>mmu-mir-465c-2

```

CCTATTTAGAATGGCGTGATCTGATGAATAAAAAAAAAAATGATCAGGGCCTTTCTAAGTAGAGTAAGGCTTACCAACTTCTACGTTTAAATGACTCGTAGATGAATATTCAGAG species len reads
--TATTTAGAATGGCGTGATCT----- mirL 21 103
--TATTTAGAATGGCGTGATCTG----- mirL 22 32
--TATTTAGAATGGCGTGAT----- mirL 19 13
--TATTTAGAATGGCGTGATC----- mirL 20 7

```

```

--TATTTAGAATGGCGCTGATCTGA----- mirL 23 7
--ATTTAGAATGGCGCTGATCTG----- mirL 21 4
--ATTTAGAATGGCGCTGATCTGA----- mirL 22 3
--TATTTAGAATGGCGCTGA----- mirL 18 2
CCTATTTAGAATGGCGCT----- mirL 18 1
--ATTTAGAATGGCGCTGATCT----- mirL 20 1
-CTATTTAGAATGGCGCTGA----- mirL 19 1
-----TTAGAATGGCGCTGATCT----- mirL 18 1
-----ACTCGTAGATGAATATTC----- mirR 18 2
-----ATGACTCGTAGATGAATA----- mirR 18 1
-----CTCGTAGATGAATATTCAGAG mirR 21 1
-----CTCGTAGATGAATATTCAG-- mirR 19 1

```

>mmu-mir-465c-1

```

CCTATTTAGAATGGCGCTGATCTGATGAATAAAAAAAAAAATGATCAGGGCCTTTCTAAGTAGAGTAAGGCTTACCAACTTCTACGTTTAATATGACTCGTAGATGAATATTCAGAG species len reads
--TATTTAGAATGGCGCTGATCT----- mirL 21 103
--TATTTAGAATGGCGCTGATCTG----- mirL 22 32
--TATTTAGAATGGCGCTGAT----- mirL 19 13
--TATTTAGAATGGCGCTGATC----- mirL 20 7
--TATTTAGAATGGCGCTGATCTGA----- mirL 23 7
--ATTTAGAATGGCGCTGATCTG----- mirL 21 4
--ATTTAGAATGGCGCTGATCTGA----- mirL 22 3
--TATTTAGAATGGCGCTGA----- mirL 18 2
CCTATTTAGAATGGCGCT----- mirL 18 1
--ATTTAGAATGGCGCTGATCT----- mirL 20 1
-CTATTTAGAATGGCGCTGA----- mirL 19 1
-----TTAGAATGGCGCTGATCT----- mirL 18 1
-----ACTCGTAGATGAATATTC----- mirR 18 2
-----ATGACTCGTAGATGAATA----- mirR 18 1
-----CTCGTAGATGAATATTCAGAG mirR 21 1
-----CTCGTAGATGAATATTCAG-- mirR 19 1

```

>mmu-mir-3092

```

AGAGGCTGGACCTGAGGGGAAAATGCCTTTCTCCAGTTTCTCCTGATCTTTGTGTCTGGGAATGGGGCTGTTTCCCCTCCTGTCTGCAATCTTATTCCA species len reads
--AGGCTGGACCTGAGGGGA----- morL 18 2
--AGGCTGGACCTGAGGGGAA----- morL 19 1
--GGCTGGACCTGAGGGGAA----- morL 18 1
AGAGGCTGGACCTGAGGGGA----- morL 20 1
-----GAAAATGCCTTTCTCCA----- mirL 18 30
-----GGAAAATGCCTTTCTCCC----- mirL 18 8
-----GGGAAAATGCCTTTCTCC----- mirL 18 1
-----TTTCTGATCTTTGTGTCT----- loop 19 6
-----TCCTGATCTTTGTGTCTG----- loop 18 1
-----TTTCTGATCTTTGTGTCT----- loop 18 1
-----GAATGGGGCTGTTTCCCCTCCTG----- mirR 23 22
-----GGAATGGGGCTGTTTCCCCTCC----- mirR 22 18

```

```

-----GAATGGGGCTGTTTCCCCTCCTGT----- mirR 24 17
-----GAATGGGGCTGTTTCCCCTCCT----- mirR 22 13
-----GGAATGGGGCTGTTTCCCCTCCTG----- mirR 24 10
-----GGAATGGGGCTGTTTCCCCTCCT----- mirR 23 9
-----GAATGGGGCTGTTTCCCCTCC----- mirR 21 8
-----GGAATGGGGCTGTTTCCCCTC----- mirR 21 6
-----GGAATGGGGCTGTTTCCCCT----- mirR 20 4
-----AATGGGGCTGTTTCCCCTCCTG----- mirR 22 4
-----AATGGGGCTGTTTCCCCTCCTGT----- mirR 23 2
-----GGAATGGGGCTGTTTCCCCTCCTGT----- mirR 25 2
-----TGGGGCTGTTTCCCCTCC----- mirR 18 2
-----GGAATGGGGCTGTTTCCCCTCCTGTC----- mirR 26 2
-----GAATGGGGCTGTTTCCCCTC----- mirR 20 1
-----GAATGGGGCTGTTTCCCCT----- mirR 19 1
-----ATGGGGCTGTTTCCCCTCC----- mirR 19 1
-----TCCTGCAATCTTATTCCA morR 18 3

```

>mmu-mir-374c

```

GAGCCATAACCTCGGACAATGATAATACAACCTGCTAAGTGCTAGAACACTTAGCAGGTTGTATTATATCCACCCGAGTAGGATTTCTTCA species len reads
GAGCCATAACCTCGGACA----- morL 18 2
---CCATAACCTCGGACAATG----- morL 18 1
-----ATAATACAACCTGCTAAGTGC----- mirL 21 92
-----TGATAATACAACCTGCTAAGTGC----- mirL 23 22
-----TAATACAACCTGCTAAGTGC----- mirL 20 10
-----ATACAACCTGCTAAGTGC----- mirL 18 6
-----TGATAATACAACCTGCTAAGTGC----- mirL 22 3
-----TGATAATACAACCTGCTAAGTGC----- mirL 24 2
-----TAATACAACCTGCTAAGTGC----- mirL 21 1
-----GATAATACAACCTGCTAAGTGC----- mirL 22 1
-----GATAATACAACCTGCTAA----- mirL 18 1
-----CTTAGCAGGTTGTATTATATCC----- mirR 22 17
-----CTTAGCAGGTTGTATTATATC----- mirR 21 6
-----CTTAGCAGGTTGTATTATATCCA----- mirR 23 2
-----TTAGCAGGTTGTATTATATCCA----- mirR 22 2
-----TAGCAGGTTGTATTATATCCAC----- mirR 22 2
-----CTTAGCAGGTTGTATTATAT----- mirR 20 2
-----TAGCAGGTTGTATTATATCC----- mirR 20 1
-----CCGAGTAGGATTTCTTCA morR 18 1
-----CCACCCGAGTAGGATTTCC----- morR 18 1

```

>mmu-mir-3099

```

CTGAACGATCGATCCCCATCCAGCTTCTTCCAGCCCTTGATGTTTTAGTACGCACATAGGCTAGAGAGAGGTTGGGGATGGGGAAAGATGAGAGCA species len reads
-TGAACGATCGATCCCCATC----- morL 19 6
--GAACGATCGATCCCCATC----- morL 18 5
--GAACGATCGATCCCCATCC----- morL 19 2
---AACGATCGATCCCCATCC----- morL 18 2

```

```

CTGAACGATCGATCCCCATCC----- morL 21 2
--GAACGATCGATCCCCATCC----- morL 20 1
-TGAACGATCGATCCCCAT----- morL 18 1
-----CCAGCTTCCTTCCAGCCCTTG----- mirL 21 10
-----ATCCCAGCTTCCTTCCAG----- mirL 18 3
-----CCAGCTTCCTTCCAGCCC----- mirL 18 2
-----CCAGCTTCCTTCCAGCCCTTGA----- mirL 22 1
-----CCCAGCTTCCTTCCAGCCCT----- mirL 20 1
-----AGCTTCCTTCCAGCCCTTG----- mirL 19 1
-----GCTTCCTTCCAGCCCTTG----- mirL 18 1
-----CCCAGCTTCCTTCCAGCCC----- mirL 19 1
-----TTGATGTTTTAGTACGCACATA----- loop 22 1
-----TAGGCTAGAGAGAGGTTGGGG----- mirR 21 22
-----TAGGCTAGAGAGAGGTTG----- mirR 18 22
-----TAGGCTAGAGAGAGGTTGGG----- mirR 20 21
-----TAGGCTAGAGAGAGGTTGGGGAT----- mirR 23 20
-----TAGGCTAGAGAGAGGTTGG----- mirR 19 14
-----TAGGCTAGAGAGAGGTTGGGGA----- mirR 22 13
-----TAGGCTAGAGAGAGGTTGGGGATG----- mirR 24 7
-----AGGCTAGAGAGAGGTTGGG----- mirR 19 3
-----AGGCTAGAGAGAGGTTGG----- mirR 18 2
-----GGCTAGAGAGAGGTTGGG----- mirR 18 1
-----AGGCTAGAGAGAGGTTGGGGATGGG----- mirR 25 1
-----ACATAGGCTAGAGAGAGGTT----- mirR 19 1
-----AGGCTAGAGAGAGGTTGGGGAT----- mirR 22 1
-----GGGGATGGGGAAAGATGA----- morR 18 2
-----ATGGGGAAAGATGAGAGCA morR 19 1
-----GGGGATGGGGAAAGATGAG----- morR 19 1
-----ATGGGGAAAGATGAGAGC----- morR 18 1
-----GGATGGGGAAAGATGAGA----- morR 18 1

```

>mmu-mir-3089

```

GTGGCTTGCAACTGAGTTTCAGGGACAGCGTGTCTCAGTTTCTGTCTGAGCATCTGCTGATCCTGAGCTGTGTTTTAGCTGCAGAAACCC species len reads
GTGGCTTGCAACTGAGTTTC----- morL 19 1
----TTGCAACTGAGTTTCAGGG----- morL 18 1
-----ACAGCGTGTCTCAGTTTC----- mirL 18 2
-----GACAGCGTGTCTCAGTTT----- mirL 18 2
-----GGACAGCGTGTCTCAGTT----- mirL 18 2
-----CAGCGTGTCTCAGTTTCT----- mirL 18 1
-----GGGACAGCGTGTCTCAGTTTC----- mirL 21 1
-----GGGACAGCGTGTCTCAGT----- mirL 18 1
-----AGCATCTGCTGATCCTGAGCTGT----- mirR 23 111
-----AGCATCTGCTGATCCTGAGCTGTG----- mirR 24 15
-----CATCTGCTGATCCTGAGCTGTGT----- mirR 23 6
-----AGCATCTGCTGATCCTGAGCTGTGT----- mirR 25 5
-----GAGCATCTGCTGATCCTGAGCTGT----- mirR 24 5

```

```
-----AGCATCTGCTGATCCTGAGCT----- mirR 21 3
-----GCATCTGCTGATCCTGAGCTGTGT----- mirR 24 3
-----AGCATCTGCTGATCCTGAGCTG----- mirR 22 3
-----AGCATCTGCTGATCCTGA----- mirR 18 3
-----CTGAGCATCTGCTGATCCTGA----- mirR 21 1
-----GAGCATCTGCTGATCCTG----- mirR 18 1
-----AGCATCTGCTGATCCTGAGCTGTGTT----- mirR 26 1
-----TTTGTAGCTGCAGAAACCC morR 18 2
-----TGTGTTTTTAGCTGCAGA----- morR 18 1

>mmu-mir-466j
TGTGTGTGTGTGCATTTCGTGTGTTTGTGCATGTGTGTATGTGTGCACATTTATGTGTGTGCATGTGTATGTATGTGTGTGTGCATGTGCATGTGTGTAATGTGTATATATGTGCATACATGTGTGTGTTGTGTGCGTAT
-GTGTGTGTGTGCATTTCGTGTGT-----
TGTGTGTGTGTGCATTTCGTGTG-----
-----TGTGCATTTCGTGTGTTTG-----
-----TGTGCATGTGTGTATGTGTGCA-----
-----TGTGCATGTGTGTATGTGTGC-----
-----TTGTGCATGTGTGTATGTGTG-----
-----TGTGCATGTGTGTATGTGTGCAC-----
-----GCATGTGTGTATGTGTGC-----
-----TTGTGCATGTGTGTATGTGTGCA-----
-----GTGCATGTGTGTATGTGTGC-----
-----TGCATGTGTGTATGTGTGCAC-----
-----GTGCATGTGTGTATGTGTG-----
-----TGTGCATGTGTGTATGTGT-----
-----TTTGTGCATGTGTGTATGTGT-----
-----GCATGTGTGTATGTGTGCAC-----
-----GTGCATGTGTGTATGTGTGCAC-----
-----TTTGTGCATGTGTGTATGTG-----
-----ATACATGTGTGTGTTTGTGTGC-----
-----CATACATGTGTGTGTTTGTGT-----
-----ATACATGTGTGTGTTTGT-----
-----CATGTGTGTGTTTGTGTG-----
-----CATACATGTGTGTGTTTGTG-----
-----ATACATGTGTGTGTTTGTGT-----
-----TGCATACATGTGTGTGTTTGTG-----
-----ACATGTGTGTGTTTGTGT-----
-----TACATGTGTGTGTTTGTGTCCG-----
-----GCATACATGTGTGTGTTT-----
-----TACATGTGTGTGTTTGTGTGC-----
-----GCATACATGTGTGTGTTTGTGT-----
-----ATACATGTGTGTGTTTGTGTCCG-----
-----TACATGTGTGTGTTTGTGTG-----
-----CATACATGTGTGTGTTTGT-----
-----ATACATGTGTGTGTTTGTG-----
-----ATACATGTGTGTGTTTGTGT-----
```

```
-----ACATGTGTGTGTTTGTGTG-----  
-----CATACATGTGTGTGTTTGTGTGC-----  
-----GCATACATGTGTGTGTTTGT-----  
-----TGCATACATGTGTGTGTTTGT-----  
-----TACATGTGTGTGTTTGTG-----  
-----CATACATGTGTGTGTTTGT-----  
-----GCATACATGTGTGTGTTTGTGTG-----  
-----T-----  
-----AT-----  
-----CGTAT-----  
-----AT-----  
-----GCGTAT-----
```

>mmu-mir-1186b

```
ATTCTCCTGCCTCTGCCTCCCAAGTCTGGGATTAAGGCATGCACCACCTTTTGTGTGTAAGGAGCTGTGGTGCCTGACTGTGATCCCAAACTTGGAGGGGATACAGGAGAATCAAAGTTCAAGGTTATCTTG speci  
-----TGCTCTGCCTCCCAAGTCTGGG----- morL  
-----CTGCCTCTGCCTCCCAAGTGC----- morL  
-----CTGCCTCTGCCTCCCAAGTCT----- morL  
-----CTCCTGCCTCTGCCTCCCAAGTGC----- morL  
ATTCTCCTGCCTCTGCCTCCCAAGTCTG----- morL  
-----CTCTGCCTCCCAAGTCT----- morL  
-----CTGCCTCTGCCTCCCAAGTCTGGGAT----- morL  
-----GCCTCTGCCTCCCAAGTGC----- morL  
-----TCCTGCCTCTGCCTCCCAAGTCTGGGAT----- morL  
-----CCTCTGCCTCCCAAGTCTGGG----- morL  
-----CCTGCCTCTGCCTCCCAAGTCTGGGA----- morL  
-----GCCTCTGCCTCCCAAGTCTG----- morL  
-----CCTGCCTCTGCCTCCCAAGTGC----- morL  
-----TGCCTCTGCCTCCCAAGTCT----- morL  
-----TGCTCTGCCTCCCAAGTCTGGGAT----- morL  
-----GCCTCTGCCTCCCAAGTCTGGGA----- morL  
-----GCCTCTGCCTCCCAAGTCT----- morL  
-----CCTCTGCCTCCCAAGTCTGGGA----- morL  
-----TGCTCTGCCTCCCAAGTCTGGGA----- morL  
-----CCTCTGCCTCCCAAGTGC----- morL  
-----GCCTCTGCCTCCCAAGTCTGG----- morL  
-----CTCTGCCTCCCAAGTCTGGGA----- morL  
-----CCTGCCTCTGCCTCCCAAGTCTGGGAT----- morL  
-----CCTCTGCCTCCCAAGTCT----- morL  
-----TGCTCTGCCTCCCAAGTCTG----- morL  
-----CTGCCTCTGCCTCCCAAGTCTGGG----- morL  
-----GCCTCTGCCTCCCAAGTCTGGGAT----- morL  
-----CCTCTGCCTCCCAAGTCTGG----- morL  
-----CCTGCCTCTGCCTCCCAAGTCTGG----- morL  
-----GCCTCTGCCTCCCAAGTCTGGG----- morL  
-----CTCCTGCCTCTGCCTCCCAAGTCTGGGAT----- morL
```



```
-----TCTGCCTCCCAAGTGCTGG----- morL
-----GATTAAGGCATGCACCA----- mirL
-----GATTAAGGCATGCACCACTT----- mirL
-----GGGATTAAGGCATGCACCACT----- mirL
-----TGGGATTAAGGCATGCACCA----- mirL
-----GGATTAAGGCATGCACCACTT----- mirL
-----GATTAAGGCATGCACCACT----- mirL
-----GATTAAGGCATGCACCACTTT----- mirL
-----TAAAGGCATGCACCACTTT----- mirL
-----GGGATTAAGGCATGCACCACTT----- mirL
-----GATTAAGGCATGCACCACTTT----- mirL
-----GGGATTAAGGCATGCACCA----- mirL
-----GGGATTAAGGCATGCACCAC----- mirL
-----TGGGATTAAGGCATGCA----- mirL
-----AGGGGATACAGGAGAATC----- mirR
-----GGATACAGGAGAATCAAA----- mirR
-----GGATACAGGAGAATCAAAA----- mirR
-----ATCAAAAGTTCAAGGTTA----- morR
-----AAGTTCAAGGTTATCTTG----- morR
```

>mmu-mir-1937b-2

```
CTCGGTCTCTTGGGTGGTTCGCGTCAATCCCGGACGAGCCCCAAATGAAAGATCCCCAAAGGGAGACCCTCACTCAAGCCTCGGGATGTGGCGCGGACCCAAGAGAGACGCGGAGACCGAAATGGCGTGACACAAAGCTA
CTCGGTCTCTTGGGTGGT-----
```

```
-----GTCAATCCCGGACGAGCCCCA-----
-----GCGTCAATCCCGGACGAGCCCCA-----
-----TCAATCCCGGACGAGCCCCA-----
-----CAATCCCGGACGAGCCCC-----
-----CAATCCCGGACGAGCCCCA-----
-----GCGTCAATCCCGGACGAGCCCC-----
-----CGAAATGGCGTGACACACA-----
-----CGAAATGGCGTGACACAAA-----
-----CGAAATGGCGTGACACAAA-----
-----GAAATGGCGTGACACAAA-----
-----CCGAAATGGCGTGACAC-----
-----AATGGCGTGACACAAAAG-----
-----AAATGGCGTGACACAAAAG-----
-----GAAATGGCGTGACACAAA-----
-----CGAAATGGCGTGACACAAAAG-----
-----ACCGAAATGGCGTGACACA-----
-----GCTA-----
-----GCTA-----
-----GCTA-----
-----AGCTA-----
-----CTA-----
```

>mmu-mir-216a

```

CTGGATGGCTATGAGTTGGTTTAAATCTCAGCTGGCAACTGTGAGATGTCCCTATCATTCCCTCACAGTGGTCTCTGGGATT species len reads
CTGGATGGCTATGAGTTG-----morL 18 1
-----ATGGCTATGAGTTGGTTT-----morL 18 1
-----TAATCTCAGCTGGCAACTGTGA-----mirL 22 88
-----TCTCAGCTGGCAACTGTGA-----mirL 19 15
-----TAATCTCAGCTGGCAACTGT-----mirL 20 12
-----AATCTCAGCTGGCAACTGTGA-----mirL 21 10
-----TAATCTCAGCTGGCAACTGTG-----mirL 21 8
-----TTAATCTCAGCTGGCAAC-----mirL 18 1
-----TAATCTCAGCTGGCAACT-----mirL 18 1
-----AATCTCAGCTGGCAACTG-----mirL 18 1
-----TTAATCTCAGCTGGCAACTGTG-----mirL 22 1
-----ATCTCAGCTGGCAACTGTGAG-----mirL 21 1
-----CTCACAGTGGTCTCTGGG-----mirR 18 6
-----TCCTCACAGTGGTCTCTGG-----mirR 19 1
-----TCCTCACAGTGGTCTCTG-----mirR 18 1
-----CTCACAGTGGTCTCTGGGAT-----mirR 20 1
-----ACAGTGGTCTCTGGGATT-----mirR 18 1
-----TCACAGTGGTCTCTGGGAT-----mirR 19 1
-----CCTCACAGTGGTCTCTGG-----mirR 18 1
-----TCACAGTGGTCTCTGGGA-----mirR 18 1
-----TCCTCACAGTGGTCTCTGGG-----mirR 20 1

```

>mmu-mir-3094

```

GATTGTTGGGGACATTTTTAAAGCATGGATTGGTTATTGATTGTCCTTTAAATTGTGTCTCAAGTGTGCTACTGTGGCAGCACCTCCCGA species len reads
---TGTTGGGGACATTTTTAAAGCA-----mirL 22 9
----TTGGGGACATTTTTAAAGCATG-----mirL 22 7
---TGGGGACATTTTTAAAGCATGG-----mirL 22 5
--TTGTTGGGGACATTTTTAAA-----mirL 20 2
---TGGGGACATTTTTAAAGC-----mirL 18 2
--TTGTTGGGGACATTTTTA-----mirL 18 2
---TGTTGGGGACATTTTTAAA-----mirL 19 2
--TTGTTGGGGACATTTTTAA-----mirL 19 1
--TTGTTGGGGACATTTTTAAAGCA-----mirL 23 1
GATTGTTGGGGACATTTTT-----mirL 19 1
---TTGGGGACATTTTTAAAGCATGGA-----mirL 24 1
---GTTGGGGACATTTTTAAAGCAT-----mirL 22 1
-----ATTGTGTCTCAAGTGTG-----mirR 18 89
-----TAAATTGTGTCTCAAGT-----mirR 18 1
-----ACTGTGGCAGCACCTCCCGA-----morR 20 8
-----CTACTGTGGCAGCACCTCC-----morR 19 4
-----CTACTGTGGCAGCACCTC-----morR 18 3
-----GCTACTGTGGCAGCACCT-----morR 18 2
-----ACTGTGGCAGCACCTCCC-----morR 18 2
-----ACTGTGGCAGCACCTCCCG-----morR 19 1
-----GTGCTACTGTGGCAGCAC-----morR 18 1

```

```
-----CTGTGGCAGCACCTCCCG- morR 18 1  
  
>mmu-mir-3079  
ACTGTGCTCCAGACAACCTCTGCCAAGCTAAGGACTTTGATCTGATGAGCTAAGCTGGAGTTCCCATTCACCTGGCTCCAGGCTCATCAGATGAAAGTCTTAGCTTAGGTGTGGCCTTTGTGGAGTAGGTGTGGTGTG  
ACTGTGCTCCAGACAACC-----  
-----GCCAAGCTAAGGACTTTG-----  
-----GCCAAGCTAAGGACTTTGA-----  
-----CTGCCAAGCTAAGGACTTTG-----  
-----GCTTAGGTGTGGCCTTTG-----  
-----TAGGTGTGGCCTTTGTG-----  
-----TTAGCTTAGGTGTGGCCT-----  
-----TTGGAGTAGGTGTGGTGT-----  
-----GAGTAGGTGTGGTGTG-----  
-----TGTGGAGTAGGTGTGGT-----
```

```
>mmu-mir-1942  
TATTTGAATAAAGAGAAGAGGCTATTTAATGTTAGACATCTAACCTCAGATGTCTTCATCTGGTTGGCCTTTGTAAGGAGGGAGGG species len reads  
--TTGAATAAAGAGAAGAG----- morL 18 8  
--TTTGAATAAAGAGAAGAG----- morL 18 3  
--GAATAAAGAGAAGAGGCC----- morL 18 2  
TATTTGAATAAAGAGAAGAG----- morL 21 1  
--ATAAAGAGAAGAGCCTA----- morL 18 1  
-----TATTTAATGTTAGACATC----- mirL 18 97  
-----GCCTATTTAATGTTAGAC----- mirL 18 1  
-----TTAATGTTAGACATCTAAC----- mirL 20 1  
-----TTAATGTTAGACATCTAAC----- mirL 19 1  
-----CAGATGTCTTCATCTGGT----- mirR 18 12  
-----TCAGATGTCTTCATCTGGTTG----- mirR 21 5  
-----GATGTCTTCATCTGGTTG----- mirR 18 2  
-----AGATGTCTTCATCTGGTTG----- mirR 19 2  
-----GCCTCTTGTAAGGAGGGA--- morR 18 2  
-----CCTCTTGTAAGGAGGGAGGG morR 20 1  
-----CCTCTTGTAAGGAGGGAG-- morR 18 1  
-----CCTCTTGTAAGGAGGGAG- morR 19 1
```

```
>mmu-mir-3063  
AATCAGGGCATTGGGCCTGGCTGGAGATCAGGTTTGCACACTGTCTTGAGAACAATGTTCCAGTGAGGAATCCTGATCTCTCGCCCCAATTGAGCCAGCTGG species len reads  
--AGGGCATTGGGCCTGGC----- morL 18 1  
AATCAGGGCATTGGGCC----- morL 18 1  
-----CTGGAGATCAGGTTTGCACACTG----- mirL 23 21  
-----TGGAGATCAGGTTTGCACACTG----- mirL 22 14  
-----TGGCTGGAGATCAGGTTTGCA----- mirL 21 14  
-----GGCTGGAGATCAGGTTTG----- mirL 18 4  
-----CTGGAGATCAGGTTTGCACACT----- mirL 22 3  
-----TGGCTGGAGATCAGGTTT----- mirL 18 1  
-----GCTGGAGATCAGGTTTGCA----- mirL 19 1
```



```
-----GTGTGTGTGTGTACATGTA-----
-----GTGTGTGTGTGTACATGTAC-----
-----CATGTGTGTGTATGGTGAG-----
-----TGCATGTGTGTGTATGGTGAG-----
-----TGCATGTGTGTGTATGGTGAGT-----
-----CATGTGTGTGTATGGTGA-----
-----TGCATGTGTGTGTATGGTGA-----
-----GCATGTGTGTGTATGGTGAG-----
-----TGCATGTGTGTGTATGGTGAGT-----
-----CATGTGTGTGTATGGTGAGT-----
-----TGCATGTGTGTGTATGGTG-----
-----TGCATGTGTGTGTATGGT-----
-----ATGTGTGTGTATGGTGAGT-----
-----GCATGTGTGTGTATGGTG-----
-----GTGCATGTGTGTATGGT-----
-----GT-----
```

>mmu-mir-466o

| ATATACATACATGCACACATAAGACACATATGAGCACATAGACACACAG | species | len | reads |
|---------------------------------------------------|---------|-----|-------|
| ---TACATACATGCACACATAAGAC-----                    | mirR    | 22  | 46    |
| ---TACATACATGCACACATAAGACA-----                   | mirR    | 23  | 11    |
| --ATACATACATGCACACATAAGA-----                     | mirR    | 22  | 8     |
| -TATACATACATGCACACAT-----                         | mirR    | 19  | 8     |
| ---TACATACATGCACACATAAGA-----                     | mirR    | 21  | 8     |
| ATATACATACATGCACACAT-----                         | mirR    | 20  | 7     |
| ----CATACATGCACACATAAGACA-----                    | mirR    | 21  | 6     |
| ----ACATACATGCACACATAAGAC-----                    | mirR    | 21  | 5     |
| --ATACATACATGCACACATAAGAC-----                    | mirR    | 23  | 3     |
| -TATACATACATGCACACATAAG-----                      | mirR    | 22  | 3     |
| ATATACATACATGCACACA-----                          | mirR    | 19  | 3     |
| ----ATACATGCACACATAAGACAC-----                    | mirR    | 21  | 2     |
| ----ATACATGCACACATAAGAC-----                      | mirR    | 19  | 2     |
| --ATACATACATGCACACATA-----                        | mirR    | 19  | 2     |
| ATATACATACATGCACACATAA-----                       | mirR    | 22  | 1     |
| --ATACATACATGCACACATAAG-----                      | mirR    | 21  | 1     |
| -TATACATACATGCACACA-----                          | mirR    | 18  | 1     |
| -TATACATACATGCACACATAA-----                       | mirR    | 21  | 1     |
| -TATACATACATGCACACATA-----                        | mirR    | 20  | 1     |
| --ATACATACATGCACACATAAGACA-----                   | mirR    | 24  | 1     |
| ATATACATACATGCACACATA-----                        | mirR    | 21  | 1     |
| ATATACATACATGCACACATAAG-----                      | mirR    | 23  | 1     |
| ---TACATACATGCACACATAAG-----                      | mirR    | 20  | 1     |
| -TATACATACATGCACACATAAGA-----                     | mirR    | 23  | 1     |
| --ATACATACATGCACACAT-----                         | mirR    | 18  | 1     |
| ----ACATACATGCACACATAAGACA-----                   | mirR    | 22  | 1     |

C:\Documents and Settings\hong\Desktop\Reprogramming-total RNA.txt

```
-----ACATACATGCACACATAAGA----- mirR 20 1
-----ATACATGCACACATAAGA----- mirR 18 1
-----ATACATGCACACATAAGACACA----- mirR 22 1
ATATACATACATGCACAC----- mirR 18 1
-----ATATGAGCACATAGACACA--- morR 19 1
-----ATATGAGCACATAGACACAG morR 22 1
```

>mmu-mir-3065

```
GAGGCTGGCAGCTGCCCTCTTCAACAAAATCACTGATGCTGGAGTCACTGTGCACCCACTCAGCACCAGGATATTGTTGGGGAGGACGGCCTGTGCAGCGT species len reads
GAGGCTGGCAGCTGCCCT----- morL 18 2
-AGGCTGGCAGCTGCCCTC----- morL 18 2
---GCTGGCAGCTGCCCTCTT----- morL 18 1
---CTGGCAGCTGCCCTCTTC----- morL 18 1
--GGCTGGCAGCTGCCCTCTTC----- morL 20 1
-AGGCTGGCAGCTGCCCTCTTC----- morL 21 1
-----TGGCAGCTGCCCTCTTCA----- morL 18 1
-----TCAACAAAATCACTGATGCTGGAGT----- mirL 25 10
-----TCAACAAAATCACTGATGCTGGA----- mirL 23 3
-----TCAACAAAATCACTGATGCTGGAG----- mirL 24 2
-----TCTTCAACAAAATCACTGA----- mirL 19 1
-----TCAACAAAATCACTGATGCTGGAGTCA----- mirL 27 1
-----AGTCACTGTGCACCCACTCAG----- loop 21 1
-----CAGCACCAGGATATTGTTGGGG----- mirR 22 52
-----GCACCAGGATATTGTTGGGG----- mirR 20 26
-----AGCACCAGGATATTGTTGGGG----- mirR 21 19
-----CAGCACCAGGATATTGTTGGGGAG----- mirR 24 1
-----AGCACCAGGATATTGTTG----- mirR 18 1
-----CAGCACCAGGATATTGTTG----- mirR 19 1
-----CTCAGCACCAGGATATTG----- mirR 18 1
-----GGACGGCCTGTGCAGCGT morR 18 1
```

>mmu-mir-669n

```
ACCACTCTGCAGATCTTTACATTTGTGTGGATGTGTGTGTAATGTATGTGCATCCACAGCACATGTGCAGAGGGCATTGGCTTACTCC species len reads
--CACTCTGCAGATCTTTAC----- morL 18 8
ACCACTCTGCAGATCTTT----- morL 18 4
---CTCTGCAGATCTTTACAT----- morL 18 1
-CCACTCTGCAGATCTTTA----- morL 18 1
-----ATTTGTGTGGATGTGTGT----- mirL 20 41
-----ATTTGTGTGGATGTGTGTGT----- mirL 22 12
-----ATTTGTGTGGATGTGTG----- mirL 19 5
-----ATTTGTGTGGATGTGTGTG----- mirL 21 4
-----ACATTTGTGTGGATGTG----- mirL 19 4
-----CATTTGTGTGGATGTG----- mirL 18 3
-----TTTGTGTGGATGTGTG----- mirL 18 3
-----ACATTTGTGTGGATGTGTGT----- mirL 22 2
-----ATTTGTGTGGATGTGTGTGTA----- mirL 23 1
```

```

-----ACATTTGTGTGGATGTGTGTG----- mirL 23 1
-----ACATTTGTGTGGATGTGTGTG----- mirL 24 1
-----ACATTTGTGTGGATGT----- mirL 18 1
-----ATTTGTGTGGATGTGT----- mirL 18 1
-----TTTGTGTGGATGTGTGT----- mirL 21 1
-----CATTTGTGTGGATGTGTG----- mirL 20 1
-----TGTGTAAATGTATGTGCA----- loop 18 1
-----ATCCACAGCACATGTGC----- mirR 18 17
-----GCATCCACAGCACATGT----- mirR 18 1
-----ATCCACAGCACATGTGCA----- mirR 19 1
-----TGCATCCACAGCACATGT----- mirR 19 1
-----ATCCACAGCACATGTGCAGAG----- mirR 22 1
-----GAGGGCATTGGCTTACTC----- morR 18 1
-----TGCAGAGGGCATTGGCTT----- morR 18 1
-----AGGGCATTGGCTTACTCC----- morR 18 1

```

>mmu-mir-3070a

```

AGCCCCTGACCTTGAACCTGGGATCCTATCCATGATCTCCTGGTGCTACCGTCAGGGGTAGATTCC species len reads
AGCCCCTGACCTTGAACCTGGGATCCTATC----- mirL 30 4
-----TGGTGCTACCGTCAGGGGTAGA--- mirR 22 69
-----TGGTGCTACCGTCAGGGGTAGAT--- mirR 23 13
-----TGGTGCTACCGTCAGGGGTAGATTCC- mirR 25 12
-----TGGTGCTACCGTCAGGGGTAGATT-- mirR 24 10
-----GGTGCTACCGTCAGGGGTAGAT--- mirR 22 1
-----TGGTGCTACCGTCAGGGGTA----- mirR 20 1
-----TGGTGCTACCGTCAGGGGTAGATTCC mirR 26 1

```

>mmu-mir-1928

```

TTGGGGAGGAGAGGGTTTCGAGGATAGAGCTTTGCGCATTGTAGGCAAGTGCTCTACCACTGAGCTACATTGCCAGCTCTAACCCCAACTTGTAAGAAGAAAAA species len reads
-TGGGGAGGAGAGGGTTTC----- morL 18 2
TTGGGGAGGAGAGGGTTT----- morL 18 2
---GGGAGGAGAGGGTTTCGA----- morL 18 2
--GGGGAGGAGAGGGTTTCG----- morL 18 1
---GGAGGAGAGGGTTTCGAG----- morL 18 1
-----GGATAGAGCTTTGCGCATTG----- mirL 20 1
-----GGATAGAGCTTTGCGCAT----- mirL 18 1
-----AGGCAAGTGCTCTACCAC----- loop 18 1
-----GCTACATTGCCAGCTCTAAC----- mirR 20 43
-----AGCTACATTGCCAGCTCT----- mirR 18 14
-----GCTACATTGCCAGCTCTAA----- mirR 19 11
-----GAGCTACATTGCCAGCTC----- mirR 18 6
-----GCTACATTGCCAGCTCTA----- mirR 18 5
-----GCTACATTGCCAGCTCTAACCC----- mirR 21 4
-----ACATTGCCAGCTCTAACCC----- mirR 19 2
-----AGCTACATTGCCAGCTCTAACCC----- mirR 22 1
-----GCTACATTGCCAGCTCTAACCC----- mirR 22 1

```

```

-----TGAGCTACATTGCCAGCTC----- mirR 19 1
-----ACATTGCCAGCTCTAACC----- mirR 18 1
-----AGCTACATTGCCAGCTCTAA----- mirR 20 1
-----AACTTGTAAGAAGAAAAA morR 19 2
-----ACCCCAACTTGTAAGAAGAA morR 18 2
-----CCAACTTGTAAGAAGAAAA morR 20 1
-----CCAACTTGTAAGAAGAAAA morR 21 1
-----CCAACTTGTAAGAAGAA morR 18 1
-----CCCAACTTGTAAGAAG morR 18 1
-----AACTTGTAAGAAGAAAA morR 18 1
-----ACCCCAACTTGTAAGAAGAA morR 22 1

```

>mmu-mir-3086

```

CTACACTTAGATTGTAGGCCATTGGAAGGGTTAGCGTCTTGACCCCAATGAGCCTACAGTCTAAGTGTGGGATGGCGGAAGCCCTC species len reads
CTACACTTAGATTGTAGG----- morL 18 2
-----CCCATTTGAAGGGTTAGC----- mirL 18 10
-----AGGCCATTGGAAGGGTT----- mirL 18 1
-----CCCAATGAGCCTACAGTCTAAG----- mirR 22 42
-----CCCAATGAGCCTACAGTCTAA----- mirR 21 24
-----CCCAATGAGCCTACAGTCTAAG----- mirR 23 7
-----CCCAATGAGCCTACAGTCTAA----- mirR 22 6
-----GACCCCAATGAGCCTACA----- mirR 18 3
-----AATGAGCCTACAGTCTAAGTGTG----- mirR 23 1
-----CCAATGAGCCTACAGTCT----- mirR 18 1
-----CCCAATGAGCCTACAGTC----- mirR 19 1
-----CCCAATGAGCCTACAGTCT----- mirR 19 1
-----CCCAATGAGCCTACAGTC----- mirR 18 1
-----CCCAATGAGCCTACAGT----- mirR 18 1
-----GTGGGATGGCGGAAGCCCT----- morR 19 2
-----GTGGGATGGCGGAAGCC-- morR 18 2
-----GTGTGGGATGGCGGAAGC----- morR 18 1
-----TGGGATGGCGGAAGCCCT----- morR 18 1
-----TGTGGGATGGCGGAAGCCCTC morR 21 1
-----AAGTGTGGGATGGCGGAA----- morR 18 1
-----GGGATGGCGGAAGCCCTC morR 18 1

```

>mmu-mir-3087

```

TGGGCTGGGGCTGTAGCACAGGGCAGGGCAAGAGTTGAGACTTATGGCTCCTAACTCACTGTCATGTCCTCAGATTACGGCTGTCACCTGATGCCAGCCCCAGCAGCT species len reads
---GCTGGGGCTGTAGCACAG----- morL 18 4
---GGGCTGGGGCTGTAGCAC----- morL 18 3
TGGGCTGGGGCTGTAGCA----- morL 18 2
---GGCTGGGGCTGTAGCACA----- morL 18 1
-----CAGGGCAGGGCAAGAGTTGAGA----- mirL 22 12
-----AGGGCAGGGCAAGAGTTG----- mirL 18 2
-----ACAGGGCAGGGCAAGAGTTGAG----- mirL 22 1
-----TCAGATTACGGCTGTCAC----- mirR 18 41

```



```
-----AGATTACGGCTGTCACCT----- mirR 18 8
-----CCTGATGCCAGCCCCAGC---- morR 19 23
-----CTGATGCCAGCCCCAGC---- morR 18 4
-----TGATGCCAGCCCCAGCA--- morR 18 3
-----ACCTGATGCCAGCCCCA---- morR 18 2
-----ATGCCAGCCCCAGCAGC- morR 18 1
-----ATGCCAGCCCCAGCAGCT morR 19 1
```

>mmu-mir-3471-2

```
ATGCCTCCATGAGATCCAACGTGTAAGGCATTTCCCAATTAGTGATAAAGGGGAAAAGGCCCTTGTGGGTGGGACAATCTCTGGGCTGGTAGTCTTGGGTTCTATAAGAGAGCAGGCTGAGCAAGCCAGGGGAAGCAAGT
--GCCTCCATGAGATCCAACGTGTA-----
---CTCCATGAGATCCAACGTG-----
ATGCCTCCATGAGATCCAACGTG-----
---CCTCCATGAGATCCAACGTG-----
--GCCTCCATGAGATCCAACGTG-----
ATGCCTCCATGAGATCCAACGTGTA-----
--GCCTCCATGAGATCCAACGTG-----
---CCTCCATGAGATCCAACGTGTAAGG-----
ATGCCTCCATGAGATCCAACGTG-----
--GCCTCCATGAGATCCAACGTGTAAGG-----
---CCTCCATGAGATCCAACGT-----
-----AGGCATTTTCCCAATTAGT-----
-----TAAGGCATTTTCCCAATTAGT-----
-----GTAAGGCATTTTCCCAATTAGT-----
-----GTAAGGCATTTTCCCAATTAG-----
-----GCATTTTCCCAATTAGTG-----
-----AAGCCAGGGGAAGCAAGT-----
-----GCAAGCCAGGGGAAGCAAG-----
-----GCCAGGGGAAGCAAGT-----
-----AAGCCAGGGGAAGCAAGT-----
-----GCCAGGGGAAGCAAGT-----
-----GCCAGGGGAAGCAAGT-----
-----AAGCCAGGGGAAGCAAGT-----
-----GCCAGGGGAAGCAAGT-----
-----CCAGGGGAAGCAAGT-----
-----AAGCCAGGGGAAGCAAGT-----
-----CAAGCCAGGGGAAGCAAGT-----
-----AGCCAGGGGAAGCAAGT-----
-----AGCCAGGGGAAGCAAGT-----
-----AGCCAGGGGAAGCAAGT-----
-----AGCAAGCCAGGGGAAGCA-----
-----AGCCAGGGGAAGCAAGT-----
-----CAAGCCAGGGGAAGCAAG-----
```

>mmu-mir-804

```
ATCCATCTTTGAGGTTACAACCTCCCCAGTAGACTGTTTCTGACATTCCTTGTGAGTTGTTTCTCACCTGGAAGATGTGGTGGCGGTGCCAAG species len reads
ATCCATCTTTGAGGTTAC----- morL 18 2
```

```

-----ATCTTTGAGGTTACAAC----- morL 18 1
-----TCTTTGAGGTTACAAC----- morL 18 1
-----TTCCCCAGTAGACTGT----- mirL 18 10
-----TCCCCAGTAGACTGTTC----- mirL 18 5
-----AACTTCCCCAGTAGACTGT----- mirL 19 3
-----AACTTCCCCAGTAGACTG----- mirL 18 2
-----ACTTCCCCAGTAGACTGT----- mirL 18 1
-----TGTGAGTTGTTCCCTCACCTGG----- mirR 21 30
-----TGTGAGTTGTTCCCTCACCTGGA----- mirR 22 12
-----TGTGAGTTGTTCCCTCACCTG----- mirR 20 9
-----TGAGTTGTTCCCTCACCTG----- mirR 18 8
-----GTGAGTTGTTCCCTCACCTGG----- mirR 20 7
-----GAGTTGTTCCCTCACCTGGAA----- mirR 20 4
-----TGTGAGTTGTTCCCTCACCT----- mirR 19 3
-----GAGTTGTTCCCTCACCTGGA----- mirR 19 1
-----ATGTGGTGGCGGTGCCCAA----- morR 19 2
-----AGATGTGGTGGCGGTGCCCAA----- morR 21 1
-----GATGTGGTGGCGGTGCCCAAG----- morR 21 1
-----AAGATGTGGTGGCGGTGC----- morR 18 1
-----GGAAGATGTGGTGGCGGT----- morR 18 1

```

>mmu-mir-3474

```

TTCCTGACTGGGCCGGGAGCCCTGGGAGGAGACGTGGATTCTTTAGAGTGCATCTGCGTCTTGTT species len reads
TTCCTGACTGGGCCGGGAG----- morL 19 2
--CCTGACTGGGCCGGGAG----- morL 18 1
-----CCCTGGGAGGAGACGTGGATT----- mirL 21 23
-----CCCTGGGAGGAGACGTGGATTC----- mirL 22 14
-----CCTGGGAGGAGACGTGGATTC----- mirL 21 13
-----GCCCTGGGAGGAGACGTGGATTCT----- mirL 24 5
-----CCCTGGGAGGAGACGTGGATTCT----- mirL 23 5
-----CCTGGGAGGAGACGTGGATT----- mirL 20 3
-----GAGCCCTGGGAGGAGACG----- mirL 18 3
-----GCCCTGGGAGGAGACGTGGATTC----- mirL 23 2
-----CCTGGGAGGAGACGTGGAT----- mirL 19 2
-----AGCCCTGGGAGGAGACGT----- mirL 18 2
-----CTGGGAGGAGACGTGGAT----- mirL 18 1
-----AGTGCATCTGCGTCTTGTT----- mirR 18 11
-----AGTGCATCTGCGTCTTGTT----- mirR 19 6
-----GTGCATCTGCGTCTTGTT----- mirR 18 5
-----TGCATCTGCGTCTTGTT----- mirR 18 1

```

>mmu-mir-3100

```

GCGGGGGTCTCTGTGCTTGGGAACGGGTGTCTTTGGGAGTCTTGGGGCTACCAAACCCCTGTGACACACCCGCTCCAGTACCTGGTCATGGAATACT species len reads
-----GGTCCTCTGTGCTTGGGA----- morL 18 30
-----GGGTCTCTGTGCTTGGG----- morL 18 4
-----GGGTCTCTGTGCTTGGGA----- morL 19 4

```

```

--GGGGTCCTCTGTGCTTG----- morL 18 2
--GGGGTCCTCTGTGCTTGG----- morL 18 2
---GGGGTCCTCTGTGCTTGGGA----- morL 20 2
--GGGGTCCTCTGTGCTTGGGA----- morL 21 1
GCGGGGGTCCTCTGTGCT----- morL 18 1
--GGGGTCCTCTGTGCTTGG----- morL 19 1
---GGGGTCCTCTGTGCTTGGG----- morL 19 1
-----GAACGGGGTGCTTTGGG----- mirL 18 2
-----CGGGGTGCTTTGGGAGTCTTGG----- mirL 23 1
-----CGGGGTGCTTTGGGAGT----- mirL 18 1
-----GGGAACGGGGTGCTTTG----- mirL 18 1
-----TGGAACGGGGTGCTTTGGGAGT----- mirL 24 1
-----TGTGACACACCCGCTCCCAGTA----- mirR 22 14
-----TGTGACACACCCGCTCCCAGTAC----- mirR 23 9
-----CTGTGACACACCCGCTCCCAGT----- mirR 22 6
-----CTGTGACACACCCGCTCCCAG----- mirR 21 2
-----GTGACACACCCGCTCCCA----- mirR 18 2
-----TGACACACCCGCTCCCAG----- mirR 18 1
-----GTGACACACCCGCTCCCAG----- mirR 19 1
-----TGACACACCCGCTCCCAGT----- mirR 19 1
-----ACCTGGTCATGGAATACT morR 18 1

>mmu-mir-1251
CATCCATGGGTCAGCTATGTGGACTTAGCTGCCAAAGGCGCTTCTCCTTCTGAACAGAGCGCTTTGCTCAGCCAGTGTAGACATGGCCTGATAAACACTGGAACTTCTCCCTTGAGAACTGG species len rea
----ATGGGTCAGCTATGTGGA----- morL 18 11
----TGGGTCAGCTATGTGGAC----- morL 18 1
CATCCATGGGTCAGCTATGT----- morL 20 1
-ATCCATGGGTCAGCTATG----- morL 18 1
---CCATGGGTCAGCTATGTG----- morL 18 1
-----ACTCTAGCTGCCAAAGGCGCT----- mirL 21 25
-----ACTCTAGCTGCCAAAGGCGC----- mirL 20 24
-----GACTCTAGCTGCCAAAGG----- mirL 18 1
-----ACTCTAGCTGCCAAAGGCGCTT----- mirL 22 1
-----TCTAGCTGCCAAAGGCGCT----- mirL 19 1
-----CTAGCTGCCAAAGGCGCTTCTC----- mirL 22 1
-----ACTCTAGCTGCCAAAGGCGCTTCTCC----- mirL 26 1
-----ACTCTAGCTGCCAAAGGC----- mirL 18 1
-----ACTCTAGCTGCCAAAGGCGCTTCC----- mirL 23 1
-----ATGGCCTGATAAACACTGG----- mirR 19 9
-----ACATGGCCTGATAAACAC----- mirR 18 1
-----GAACTTCTCCCTTGAGAA----- morL 18 1
-----TTCTCCCTTGAGAACTGG morR 18 1
-----GAACTTCTCCCTTGAGA----- morR 18 1
-----ACTTCTCCCTTGAGAACT-- morR 18 1
-----CTTCTCCCTTGAGAACTG- morR 18 1

```

>mmu-mir-3103

```

GTGAGAAGAGAGGAGGTATGGGGAGGAGGGAGGATCTGCTGTTAGAAAGTCTCTGGTTTGTGACCTCTAACCTCTGATCCTTCCCACAGGCTCTTTGCCGACATC species len reads
-----AGAGGAGGTATGGGGAGG----- morL 18 2
---GAAGAGAGGAGGTATGGG----- morL 18 1
---AGAAGAGAGGAGGTATGG----- morL 18 1
GTGAGAAGAGAGGAGGTATGGGGAG----- morL 25 1
---AGAAGAGAGGAGGTATGGG----- morL 19 1
-----AGGAGGGAGGATCTGCTG----- mirL 18 3
-----AGGGAGGATCTGCTGTTAG----- mirL 19 1
-----AGGGAGGATCTGCTGTTA----- mirL 18 1
-----GGGAGGAGGGAGGATCTG----- mirL 18 1
-----GGAGGGAGGATCTGCTGT----- mirL 18 1
-----TAACCTCTGATCCTTCCCACAGG----- mirR 23 38
-----TAACCTCTGATCCTTCCCACA----- mirR 21 11
-----TAACCTCTGATCCTTCCCACAG----- mirR 22 8
-----TCTAACCTCTGATCCTTCCCACA----- mirR 23 3
-----TCTAACCTCTGATCCTTC----- mirR 18 2
-----TCTAACCTCTGATCCTTCCCACAGG----- mirR 25 2
-----AACCTCTGATCCTTCCCA----- mirR 18 2
-----AACCTCTGATCCTTCCCACA----- mirR 20 1
-----AACCTCTGATCCTTCCCACAGG----- mirR 22 1
-----CTAACCTCTGATCCTTCCC----- mirR 19 1
-----TCTAACCTCTGATCCTTCCCA----- mirR 21 1
-----ACCTCTGATCCTTCCCAC----- mirR 18 1
-----AGGCTCTTTGCCGACATC morR 18 1

```

>mmu-mir-3472

```

AGGGACATTTGGGTTCTTTCCAGCTTCTGGCTATTATAAATAAGGCTGCTCCTTATTTATAATAGCCAGAAGCTGGAAGGAACCCAGATGCCCTCAACAGAGGAATGGATACAGAAAATGTGGTACAT species le
AGGGACATTTGGGTTCTTTTC----- morL 20 2
-GGGACATTTGGGTTCTTTTC----- morL 19 1
---CATTGGGTTCTTTCCAG----- morL 18 1
-GGGACATTTGGGTTCTTTTC----- morL 18 1
---ACATTTGGGTTCTTTCCAG----- morL 19 1
-----GCTTCTGGCTATTATAAA----- mirL 18 7
-----CCAGCTTCTGGCTATTATA----- mirL 19 1
-----AACCCAGATGCCCTCAACA----- mirR 20 10
-----ACCCAGATGCCCTCAAC----- mirR 18 8
-----CCCAGATGCCCTCAACAGAGGAATGGATA----- mirR 30 7
-----GGAACCCAGATGCCCTCAACAGAG----- mirR 25 5
-----CCAGATGCCCTCAACAGA----- mirR 19 4
-----AACCCAGATGCCCTCAAC----- mirR 19 4
-----AGGAACCCAGATGCCCTC----- mirR 19 3
-----AGGAACCCAGATGCCCT----- mirR 18 3
-----GGAACCCAGATGCCCTCAACAGA----- mirR 24 3
-----AACCCAGATGCCCTCAA----- mirR 18 2
-----ACCCAGATGCCCTCAACAGAGGAATGGATAC----- mirR 32 2

```

```

-----AACCCAGATGCCCTCAACAGAGGAATGGATAC----- mirR 33 1
-----CCCAGATGCCCTCAACAG----- mirR 19 1
-----CCCAGATGCCCTCAACA----- mirR 18 1
-----GGAACCCAGATGCCCTC----- mirR 18 1
-----AGGAATGGATACAGAAAATGTGGTACAT morR 28 7
-----AGGAATGGATACAGAAAATGTGG----- morR 23 2
-----ACAGAGGAATGGATACAGA----- morR 19 2
-----AGAGGAATGGATACAGAA----- morR 18 1
-----AGAGGAATGGATACAGAAAATGTGG----- morR 25 1
-----ACAGAGGAATGGATACAGAAAATGTGGT---- morR 28 1
-----AGGAATGGATACAGAAAAT----- morR 19 1

```

>mmu-mir-1912

```

AAGCATATTAGTCTCTAGGATGTGCTCATTGCATGGGCTGTGTAGATTTTATTAAATACACAGAACATGCAGTGAGAACTTGATAGAGATTGGAAGACATC species len reads
AAGCATATTAGTCTCTAG----- morL 18 8
--GCATATTAGTCTCTAGGAT----- morL 19 1
--AGCATATTAGTCTCTAGGA----- morL 19 1
AAGCATATTAGTCTCTAGGA----- morL 20 1
-----ATTAGTCTCTAGGATGTG----- morL 18 1
--CATATTAGTCTCTAGGATGT----- morL 20 1
--GCATATTAGTCTCTAGGA----- morL 18 1
-----GTGCTCATTGCATGGGCT----- mirL 18 2
-----ATGTGCTCATTGCATGG----- mirL 18 1
-----GATGTGCTCATTGCATGG----- mirL 18 1
-----CATGCAGTGAGAACTTGA----- mirR 18 48
-----ACATGCAGTGAGAACTTG----- mirR 18 9
-----AACATGCAGTGAGAACTTG----- mirR 19 2
-----GAACATGCAGTGAGAACT----- mirR 18 1
-----ATGCAGTGAGAACTTGATA----- mirR 19 1
-----GATAGAGATTGGAAGACA-- morR 18 1
-----TAGAGATTGGAAGACATC morR 18 1

```

>mmu-mir-546

```

CAAAACTAAACAGGATCTATCATGGTGGCACGGAGTCAGCTAGATGTTGTCTCTTGCTATCCCTGTGCTAGTTCCATGTTTTAGAAGCAAAG species len reads
--AAACTAAACAGGATCTAT----- morL 18 1
CAAAACTAAACAGGATCT----- morL 18 1
-----TCATGGTGGCACGGAGTCAGCT----- mirL 22 22
-----TCATGGTGGCACGGAGTCAGCTAG----- mirL 24 1
-----AGATGTTGTCTCTTGCTA----- loop 18 15
-----AGATGTTGTCTCTTGCTATC----- loop 20 1
-----GCTAGATGTTGTCTCTTG----- loop 18 1
-----ATCCCTGTGCTAGTTCCA----- mirR 18 28
-----TATCCCTGTGCTAGTTCCATGTT----- mirR 24 5
-----TATCCCTGTGCTAGTTCCATGT----- mirR 22 2
-----TCCCTGTGCTAGTTCCAT----- mirR 18 1
-----CCATGTTTTAGAAGCAAAG morR 19 1

```

```
-----CCATGTTTTAGAAGCAAA- morR 18 1

>mmu-mir-1937b-5
CTCGGTCTCTTGGGTGGTTCGCGTCAATCCCGGACGAGCCCCAAATGAAAGATCCCCAAAGGGAGACCCCTCACTCAAGCCTCAGGATGTGGCGCGGACCCAAGAGAGACGCG species len reads
CTCGGTCTCTTGGGTGGT----- morL 18 1
-----GTCAATCCCGGACGAGCCCCA----- mirL 22 43
-----GCGTCAATCCCGGACGAGCCCCA----- mirL 24 10
-----TCAATCCCGGACGAGCCCCA----- mirL 21 6
-----GCGTCAATCCCGGACGAGCCCC----- mirL 22 1
-----CAATCCCGGACGAGCCCC----- mirL 19 1
-----CAATCCCGGACGAGCCCCA----- mirL 20 1
-----TCAAGCCTCAGGATGTGG----- mirR 18 10
-----CACTCAAGCCTCAGGATGTGG----- mirR 21 1
-----CAAGCCTCAGGATGTGGCG----- mirR 19 1
-----TCAAGCCTCAGGATGTGGCG----- mirR 20 1
-----TCAAGCCTCAGGATGTGGC----- mirR 19 1
-----CTCAAGCCTCAGGATGTGGCG----- mirR 21 1
-----GGACCCAAGAGAGACGCG morR 18 2

>mmu-mir-1902
TGCAATACAACCTAAGTTTATTTTGGGAGTGTGTTGCTGTATAATTGGACTTGATAAAATGTTTAGAGGTGCAGTAGGCATGACTTGAGTAGATAATGAGAGGAAATGCAAGTGCTCATCGACTCATGATGTGCGCCCTCCT
-GCAATACAACCTAAGTTT-----
TGCAATACAACCTAAGTT-----
-GCAATACAACCTAAGTTTA-----
-----ATTTTGGGAGTGTGTTGCT-----
-----TTATTTTGGGAGTGTGTTG-----
-----TTTATTTTGGGAGTGTGTT-----
-----CAAGTGCTCATCGACTCATGAT-----
-----CAAGTGCTCATCGACTCAT-----
-----CAAGTGCTCATCGACTCATG-----
-----CAAGTGCTCATCGACTCATGA-----
-----CAAGTGCTCATCGACTCA-----
-----TGCAAGTGCTCATCGACTC-----
-----CAAGTGCTCATCGACTCATGAT-----
-----GTGCTCATCGACTCATGA-----
-----GCAAGTGCTCATCGACTC-----
-----GCAAGTGCTCATCGACTCATGA-----
-----ATGCAAGTGCTCATCGACTC-----
-----GCAAGTGCTCATCGACTCATG-----
-----AAGTGCTCATCGACTCATG-----
-----AGTGCTCATCGACTCATG-----
-----GTGCTCATCGACTCATGAT-----
-----GATGTGCGCCCTCCT-----

>mmu-mir-1937b-4
CTCGGTCTCTTGGGTGGTTCGCGTCAATCCCGGACGAGCCCCAAATGAAAGATCCCCAAAGGGAGATCCTCACTCAAGCCTCGGGATGTGGCGCGGACCCAAGAGAGACGCG species len reads
```

```

CTCGGTCTCTTGGGTGGT----- morL 18 1
-----GTCAATCCCGGACGAGCCCCA----- mirL 22 43
-----GCGTCAATCCCGGACGAGCCCCA----- mirL 24 10
-----TCAATCCCGGACGAGCCCCA----- mirL 21 6
-----CAATCCCGGACGAGCCCC----- mirL 19 1
-----CAATCCCGGACGAGCCCCA----- mirL 20 1
-----GCGTCAATCCCGGACGAGCCCC----- mirL 22 1
-----TCAAGCCTCGGGATGTGG----- mirR 18 8
-----ACTCAAGCCTCGGGATGT----- mirR 18 1
-----CAAGCCTCGGGATGTGGC----- mirR 18 1
-----TCAAGCCTCGGGATGTGGC----- mirR 19 1
-----GGACCCAAGAGAGACGCG morR 18 2

```

>mmu-mir-3112

```

ATCACAACATCTAAATGAACAGTGACATAGAAAAGGCAGTCTGCATTTATTCTGGAGCTGCAGTTTGTCTCTCTTTTGTCTCTGTCAGTTGGTTTGTCCAGT species len reads
ATCACAACATCTAAATGAACA----- morL 21 1
-----ACATAGAAAAGGCAGTCTGCAT----- mirL 22 18
-----ACATAGAAAAGGCAGTCTGCATT----- mirL 23 8
-----ACATAGAAAAGGCAGTCTGCA----- mirL 21 6
-----ACATAGAAAAGGCAGTCTGC----- mirL 20 5
-----GACATAGAAAAGGCAGTCTGCA----- mirL 22 1
-----CATAGAAAAGGCAGTCTGC----- mirL 19 1
-----TGCAGTTTGTCTCTCTTTTGTCT----- mirR 22 16
-----CAGTTTGTCTCTCTTTTGTCT----- mirR 21 8
-----GCAGTTTGTCTCTCTTTG----- mirR 19 2
-----CTGCAGTTTGTCTCTCT----- mirR 18 2
-----CTGCAGTTTGTCTCTCTT----- mirR 19 1
-----AGTTTGTCTCTCTTTTGT----- mirR 18 1
-----GTCTCTGTCAGTTGGTTT----- morR 18 1
-----TCTCTGTCAGTTGGTTTGTCTCC--- morR 22 1
-----TCTGTCAGTTGGTTTGTCT----- morR 18 1
-----TGTCAGTTGGTTTGTCTCCAGT morR 21 1
-----GTCTCTGTCAGTTGGTTTGT----- morR 19 1

```

>mmu-mir-208a

```

CTTACTTCCTTTGACGGGTGAGCTTTTGGCCCGGGTTATACCTGACACTCACGTATAAGACGAGCAAAAAGCTTGTGGTTCAGAGGAGCTATCATCATGCAGCCTGGGCCTGAGGGAAGCGGGTGGGGGTGCACAG spec
--TACTTCCTTTGACGGGTGA----- morL
CTTACTTCCTTTGACGGG----- morL
-----GAGCTTTTGGCCCGGGTTATAC----- mirL
-----GGTGAGCTTTTGGCCCGG----- mirL
-----GCTTTTGGCCCGGGTTAT----- mirL
-----CTTTTGGCCCGGGTTATA----- mirL
-----GAGCTTTTGGCCCGGGTTATACC----- mirL
-----GAAGCGGGTGGGGGTGCA----- mirR
-----GGGAAGCGGGTGGGGGTG----- mirR
-----GCGGGTGGGGGTGCACAG mirR

```

```
-----AGGGAAGCGGGTGGGGGTG----- mirR
-----AGCGGTGGGGTGCACA- mirR
-----AAGCGGTGGGGTGCACAG mirR
-----AGGGAAGCGGGTGGGGGT----- mirR
-----AGGGAAGCGGGTGGGGTGC--- mirR
-----GGAAGCGGGTGGGGGTGC--- mirR
```

>mmu-mir-3071

```
TTTCCAACCGACGACATGATAGAACCTCTGAAGACTCATTGAGACGATGATGGAGCTTAAGAATCCATCATCAAACAAATGGAGTCTCCGAGGGCTCATCCAACACCGTTGAAGAGACACCAGGCAGCAGTGGAGCC
TTTCCAACCGACGACATG-----
-----ACCGACGACATGATAGAA-----
-----GAACCCTCTGAAGACTCA-----
-----AGAACCCTCTGAAGACTC-----
-----ACCCTCTGAAGACTCATT-----
-----AACCCTCTGAAGACTCAT-----
-----ACCGTTGAAGAGACACCA-----
-----CCGTTGAAGAGACACCAG-----
-----AACACCGTTGAAGAGACA-----
-----ACACCGTTGAAGAGACACCA-----
-----GTTGAAGAGACACCAGGCAGCAGTGGAGCC-----
-----AGGCAGCAGTGGAGCC-----
-----AGGCAGCAGTGGAGCC-----
-----GCAGCAGTGGAGCC-----
```

>mmu-mir-568

```
GTTGAAACAGTATACACTATATTATGTATAAATGTATACACACTTCTATATATGTCCACATATATGCGGTGTGTGTATTATACAGGTATAGGTGTGTGTGCACGCACACAGGTGCACATAGCATATCAAGTGTTCATTACA
--TTGAAACAGTATACACTAT-----
GTTGAAACAGTATACACTAT-----
--TGAAACAGTATACACTATATT-----
-----ATGTATAAATGTATACACA-----
-----ATGTATAAATGTATACAC-----
-----ATGTATAAATGTATACACAC-----
-----GTATAAATGTATACACAC-----
-----TAGCATATCAAGTGTTC-----
-----ATAGCATATCAAGTGTTC-----
-----GCATATCAAGTGTTCATT-----
-----AGCATATCAAGTGTTCATTACA-----
-----TAGCATATCAAGTGTTCATT-----
-----TAGCATATCAAGTGTTCATTA-----
-----TAGCATATCAAGTGTTCAT-----
-----ACATAGCATATCAAGTGTTC-----
```

>mmu-mir-3088

```
CGGGAAGCCAGGACCTCAGTGCCTGCTATGCAGTTGTTTCATGAGCTCTGGCTCCGAAGGTTTCATGAGCAGCTGCAAAGGTGTTGCTGCTGTCAGAACACTT species len reads
---GAAGCCAGGACCTCAGTG----- morL 18 11
---GCCAGGACCTCAGTGCCT----- morL 18 1
```



```

----AAGCCAGGACCTCAGTGCC----- morL 19 1
CGGGAAGCCAGGACCTCA----- morL 18 1
-----CCTGCTATGCAGTTGTTC----- mirL 18 5
-----GCTATGCAGTTGTTCATGA----- mirL 19 4
-----GCTATGCAGTTGTTCATG----- mirL 18 3
-----GCTATGCAGTTGTTCATGAGCT----- mirL 22 1
-----GAGCTCTGGCTCCGAAGGTTC----- loop 21 1
-----TCATGAGCAGCTGCAAAGGTGT----- mirR 22 20
-----TTCATGAGCAGCTGCAAAGGTGT----- mirR 23 6
-----TTCATGAGCAGCTGCAAAGGTG----- mirR 22 5
-----TCATGAGCAGCTGCAAAGGTGTT----- mirR 23 3
-----TCATGAGCAGCTGCAAAGGTG----- mirR 21 1
-----TTCATGAGCAGCTGCAAAGGT----- mirR 21 1
-----TTCATGAGCAGCTGCAAAG----- mirR 19 1
-----CATGAGCAGCTGCAAAGG----- mirR 18 1
-----TTGCTGCTGTCAAGAACA----- morR 18 1
-----GCTGCTGTCAAGAACA----- morR 19 1

```

>mmu-mir-3075

```

TATTTACCCTGTGGTTTGTACTGTCTGGGAGCAGCCAAGGACAAGTTACCTCTTGTCTTCTATCCTTGGCCTTCCTAGGTGTCCAAGCTCACAGTAGGCTGGGA species len reads
TATTTACCCTGTGGTTTGTACTGTCTGGGAGCAGCCAAGGACAAGTTACCTCTTGTCTTCTATCCTTGGCCTTCCTAGGTGTCCAAGCTCACAGTAGGCTGGGA morL 18 1
-----ACCCTGTGGTTTGTACTG----- morL 18 1
-----ACCCTGTGGTTTGTACTGT----- morL 19 1
-----TACCCTGTGGTTTGTACT----- morL 18 1
-----TGTCTGGGAGCAGCCAAGGACAAG----- mirL 24 6
-----TGTCTGGGAGCAGCCAAGGACAA----- mirL 23 4
-----ACTGTCTGGGAGCAGCCA----- mirL 18 1
-----TGTCTGGGAGCAGCCAAGGAC----- mirL 21 1
-----GTCTGGGAGCAGCCAAGGAC----- mirL 20 1
-----AGTTACCTCTTGTCTTCT----- loop 18 1
-----ATCCTTGGCCTTCCTAGGTGT----- mirR 21 20
-----ATCCTTGGCCTTCCTAGGTGTC----- mirR 22 13
-----ATCCTTGGCCTTCCTAGGTGTCC----- mirR 23 9
-----ATCCTTGGCCTTCCTAGGT----- mirR 19 1
-----AGCTCACAGTAGGCTGGG----- morR 18 1
-----AGCTCACAGTAGGCTGGGA----- morR 19 1
-----CAAGCTCACAGTAGGCTG----- morR 18 1
-----CCAAGCTCACAGTAGGCTG----- morR 19 1

```

>mmu-mir-467g

```

CAGGTCTTGTGCATGATATATATATATGTGTGTGTATATATATATACATATATACATACATACACATGTATATGTATATATACATACACACATATATAT species len reads
CAGGTCTTGTGCATGATATATATATATATGTGTGTGTATATATATATACATATATACATACATACACATGTATATGTATATATACATACACACATATATAT morL 18 1
-----ATATATATGTGTGTGTATAT----- mirL 22 2
-----ATATATGTGTGTGTATATA----- mirL 21 1
-----ATATATGTGTGTGTATATAT----- mirL 22 1
-----TATACATACACACATATAT----- mirR 21 12

```

```

-----TATACATACACACACATATA--- mirR 20 10
-----ATATACATACACACACATATAT-- mirR 22 5
-----TATATACATACACACACATATA--- mirR 22 4
-----ATATACATACACACACATA----- mirR 19 4
-----TATACATACACACACATAT----- mirR 19 3
-----ATATACATACACACACATAT----- mirR 20 2
-----TATATACATACACACACATATAT-- mirR 23 2
-----TATATACATACACACACATAT----- mirR 21 2
-----ATATATACATACACACAC----- mirR 18 2
-----ATACATACACACACATAT----- mirR 18 2
-----ATATACATACACACACAT----- mirR 18 2
-----TATACATACACACACATA----- mirR 18 1
-----ATACATACACACACATATAT-- mirR 20 1
-----ACATACACACACATATAT-- mirR 18 1
-----ATATATACATACACACACATAT--- mirR 22 1
-----TACATACACACACATATATAT mirR 21 1
-----TATACATACACACATATATA- mirR 22 1
-----ATATATACATACACACACAT----- mirR 20 1

```

>mmu-mir-3067

```

TGCCCCAGCTTCCCCAGTTCTCAGGCCCGCTGTGGTGTGAAGTTAGGTTACCAAGCGGCTGCCCTGGGAGAGGGGGAGGTGTGCTCCTCTTCCCCCTGCATCTGCAGAAGTC species len reads
-----AGCTTCCCCAGTTCTCAG----- morL 18 7
TGCCCCAGCTTCCCCAGTTCTCAG----- morL 24 1
--CCCCAGCTTCCCCAGTTC----- morL 18 1
-----GGCCCGCTGTGGTGTGAAG----- mirL 19 14
-----GCCCGCTGTGGTGTGAAG----- mirL 18 7
-----CCCGCTGTGGTGTGAAGTT----- mirL 19 1
-----CAGGCCCGCTGTGGTGTG----- mirL 18 1
-----CCCCCTGCATCTGCAGAA--- mirR 18 19
-----TTCCCCCTGCATCTGCAGAAGTC mirR 23 4
-----CCCCTGCATCTGCAGAAGT- mirR 19 2
-----TCCCCCTGCATCTGCAGA--- mirR 18 1
-----CCCCTGCATCTGCAGAAG-- mirR 18 1
-----TTCCCCCTGCATCTGCAG---- mirR 18 1
-----CCTGCATCTGCAGAAGTC mirR 18 1

```

>mmu-mir-718

```

CGCCCCCGTGTGGCGGAAGGCCGCGGAGGGCAAGATGGCGGCGGGTTCGAGCGCCGCTCTCCGCCCCGCCGGGTGTCGCACGAGGCCGCTGAAGGGGAAGTGAGTCAGTGTCCGCGGACCCGGCCCGCT species
CGCCCCCGTGTGGCGGAAG----- morL 19
-----CGCGGAGGGCAAGATGGC----- mirL 18
-----GGAAGTGAGTCAGTGTCC----- mirR 18
-----GAAGTGAGTCAGTGTCCG----- mirR 18
-----AGGGGAAGTGAGTCAGTG----- mirR 18
-----AAGTGAGTCAGTGTCCGC----- mirR 18
-----GGGGAAGTGAGTCAGTGT----- mirR 18
-----GAAGTGAGTCAGTGTCCGC----- mirR 19

```

```
-----GGGGAAGTGAGTCAGTGTC----- mirR 19
-----AGTGAGTCAGTGTCCGCG----- mirR 18
-----TCCGCGACCCGGCCCGCT morR 19
```

>mmu-mir-3475

```
GCTCTGCTCCCAAATCATGTACCCCCACAGAGGGTCCAGATGGTTCTTAGTTCTTCTGGAGGCACATGGTTTGAAGAGCAGAGC species len reads
---CTGCTCCCAAATCATGT----- morL 18 1
GCTCTGCTCCCAAATCA----- morL 18 1
---GCTCCCAAATCATGTAC----- morL 18 1
-----ACCCCCACAGAGGGTCCA----- mirL 18 4
-----TACCCCCACAGAGGGTCC----- mirL 18 3
-----CCCACAGAGGGTCCAGAT----- mirL 18 1
-----CTTAGTTCTTCTGGAGGC----- mirR 18 27
-----TTCTTAGTTCTTCTGGAG----- mirR 18 1
-----TAGTTCTTCTGGAGGCAC----- mirR 18 1
-----CTTAGTTCTTCTGGAGGCACAT----- mirR 22 1
-----ACATGGTTTGAAGAGCAG--- morR 18 6
-----GGCACATGGTTTGAAGAG----- morR 18 2
-----TGTTTGAAGAGCAGAGC morR 18 2
-----ATGGTTTGAAGAGCAGAG- morR 18 2
-----ACATGGTTTGAAGAGCAGA-- morR 19 1
```

>mmu-mir-3090

```
GATTCCTGTCCCAGTGGTCTGGGTGGGGCCTGAGATCCTGAATTCTAATGAGCTCCCAGGTGACACCCTGACTCACTGTGCCAGAGGACTGCAGTTTGTGTGGAC species len reads
-ATTCCTGTCCCAGTGGTC----- morL 18 1
GATTCCTGTCCCAGTGGTCT----- morL 20 1
--TTCCTGTCCCAGTGGTCT----- morL 18 1
-----TCTGGGTGGGGCCTGAGA----- mirL 18 4
-----TGGTCTGGGTGGGGCCTGAG----- mirL 20 1
-----GGGTGGGGCCTGAGATCCTG----- mirL 20 1
-----GTGCCAGAGGACTGCAGT----- mirR 18 31
-----ACTGTGCCAGAGGACTGC----- mirR 18 2
-----GTGCCAGAGGACTGCAGTTT----- mirR 20 1
-----GCCAGAGGACTGCAGTTT----- mirR 18 1
-----TGTGCCAGAGGACTGCAG----- mirR 18 1
-----TGAGTAGCAAGGTTGTGT----- morR 18 3
-----TGAGTAGCAAGGTTGTGTGG-- morR 20 1
-----TTTGTAGTAGCAAGGTTGT----- morR 18 1
-----TGAGTAGCAAGGTTGTGTGGAC morR 22 1
```

>mmu-mir-669p-1

```
CATAACATACACACACACGTAT species len reads
CATAACATACACACACACACGT-- mirR 22 15
-ATAACATACACACACACACGT-- mirR 21 10
-ATAACATACACACACACACGTAT mirR 23 9
CATAACATACACACACACACGTAT mirR 24 6
```

```
-ATAACATACACACACACACGTA- mirR 22 4
CATAACATACACACACACACAC---- mirR 20 2
CATAACATACACACACACACACG--- mirR 21 2
CATAACATACACACACACACACGTA- mirR 23 1
---AACATACACACACACACACGT-- mirR 19 1
```

>mmu-mir-669p-2

```
CATAACATACACACACACACGTAT species len reads
CATAACATACACACACACACACGT-- mirR 22 15
-ATAACATACACACACACACACGT-- mirR 21 10
-ATAACATACACACACACACACGTAT mirR 23 9
CATAACATACACACACACACACGTAT mirR 24 6
-ATAACATACACACACACACACGTA- mirR 22 4
CATAACATACACACACACACACAC---- mirR 20 2
CATAACATACACACACACACACG--- mirR 21 2
CATAACATACACACACACACACGTA- mirR 23 1
---AACATACACACACACACACGT-- mirR 19 1
```

>mmu-mir-3080

```
ATGTTTGAACAAAAGTCCACGGTTTGAGATCTGAAGCGCCTGTCTTGGATCGTGGCCCTGTAGTCATCCTCGGGCAAAGCGCTTGACATCTCTGTGCCTCCTTTCTCGTCTGGAGACCCGAGATGTCACA species
-----TGAACAAAAGTCCACGGT----- morL 18 3
-TGTTTGAACAAAAGTCCA----- morL 18 3
-----AACAAAAGTCCACGGTTT----- morL 18 1
-----TGAACAAAAGTCCACGGTT----- morL 19 1
ATGTTTGAACAAAAGTCCA----- morL 19 1
-----TTGAACAAAAGTCCACGG----- morL 18 1
-----TTTGAGATCTGAAGCGC----- mirL 18 2
-----TTGAGATCTGAAGCGCCT----- mirL 18 1
-----TCTGTGCCTCCTTTCTCG----- mirR 18 8
-----TGTGCCTCCTTTCTCGTC----- mirR 18 2
-----TCTGTGCCTCCTTTCTCGT----- mirR 19 2
-----CTCTGTGCCTCCTTTCTCG----- mirR 19 1
-----CTCTGTGCCTCCTTTCTC----- mirR 18 1
-----TCTCTGTGCCTCCTTTCT----- mirR 18 1
-----ATCTCTGTGCCTCCTTTCT----- mirR 18 1
-----GTGCCTCCTTTCTCGTCT----- mirR 18 1
-----TCTGGAGACCCGAGATGT----- morR 18 6
-----TGGAGACCCGAGATGTCAC----- morR 19 2
-----GGAGACCCGAGATGTCAC----- morR 18 1
-----TGGAGACCCGAGATGTCA----- morR 18 1
-----GGAGACCCGAGATGTCACA morR 19 1
```

>mmu-mir-669i

```
ACCAATAATGTGCATGTGTATAGTTGTGTGCATATTCATTTCTCTATATGACTATGCATATACACATGCATACAAACTCACATACAGGAATGACAGTCA species len reads
-CCAATAATGTGCATGTGT----- mirL 18 1
----ATAATGTGCATGTGTATAG----- mirL 21 1
```

```

ACCAATAATGTGCATGTG-----TGCATATACACACATGCATAC----- mirL 18 1
-----TGCATATACACACATGCATACA----- mirR 21 11
-----CATATACACACATGCATAC----- mirR 22 4
-----TGCATATACACACATGCATA----- mirR 19 3
-----ATATACACACATGCATACAA----- mirR 20 3
-----GCATATACACACATGCATAC----- mirR 20 3
-----TATGCATATACACACATGCATA----- mirR 20 3
-----ATATACACACATGCATAC----- mirR 22 1
-----CTATGCATATACACACATGCAT----- mirR 18 1
-----TGCATATACACACATGCAT----- mirR 22 1
-----TACAAACTCACATACAGG----- mirR 19 1
-----AAACTCACATACAGGAAT----- morR 18 2
-----AACTCACATACAGGAATG----- morR 18 1
-----CTCACATACAGGAATGACAGTCA morR 23 1
-----CTCACATACAGGAATGAC----- morR 18 1
-----ACAAACTCACATACAGGA----- morR 18 1
-----CAAACTCACATACAGGAAT----- morR 19 1

```

>mmu-mir-3110

```

GTGGGGCTGTGTTCTGCCTCCCTGAAGGCTCTGTTGTCACCTCTGGGCACTCCATCGGAGGCAGACACTCAACCCACACTTTGCCATCTTCCATG species len reads
-TGGGGCTGTGTTCTGCCT----- morL 18 1
GTGGGGCTGTGTTCTGCC----- morL 18 1
-----CCCCTGAAGGCTCTGTTG----- mirL 18 13
-----CCCCTGAAGGCTCTGTTGT----- mirL 19 1
-----TCCCCTGAAGGCTCTGTT----- mirL 18 1
-----CCTGAAGGCTCTGTTGTC----- mirL 18 1
-----AGGCAGACACTCAACCCC----- mirR 18 9
-----CAGACACTCAACCCACACTTT----- mirR 22 2
-----AGGCAGACACTCAACCCAC----- mirR 20 1
-----GGCAGACACTCAACCCAC----- mirR 19 1
-----GAGGCAGACACTCAACCCAC----- mirR 21 1
-----GAGGCAGACACTCAACCCC----- mirR 19 1
-----CCCACACTTTGCCATCTT----- morR 18 1
-----ACTTTGCCATCTTCCATG morR 18 1
-----ACACTTTGCCATCTTCCA-- morR 18 1

```

>mmu-mir-466p

```

TATGTGTGTGTACATGTACATGTGTGAATATGATGATATATACATACACGCACACATAAGACACATATGAGCACACAGACACACAGGAATGGCACTCACTCATCGATCTATGTGACTGTGAGC species len rea
TATGTGTGTGTACATGTACATG----- mirL 22 6
-----CGATCTATGTGACTGTGA-- mirR 18 23
-----ATCGATCTATGTGACTGTGA-- mirR 20 2
-----CATCGATCTATGTGACTGTGA-- mirR 21 1
-----CGATCTATGTGACTGTGAG- mirR 19 1
-----CATCGATCTATGTGACTG----- mirR 18 1
-----ATCGATCTATGTGACTGT---- mirR 18 1

```

-----ATCTATGTGACTGTGAGC mirR 18 1

>mmu-mir-466a

```
TTATGTGTGTGTACATGTACATATGTGAATATGATATCCATATACATACACGCACACATAAGACACATATGAGCACACAGGCACACAGGAATGGCACTCACTCATTGAT species len reads
-TATGTGTGTGTACATGTACATA----- mirL 22 11
-TATGTGTGTGTACATGTACATAT----- mirL 23 10
TTATGTGTGTGTACATGTACATAT----- mirL 24 2
-----CACATATGAGCACACAGGCACACAGGAA----- mirR 28 4
-----CACATATGAGCACACAGGCACAC----- mirR 23 2
-----ACACATATGAGCACACAGGCAC----- mirR 22 1
-----CATATGAGCACACAGGCA----- mirR 18 1
-----CACATATGAGCACACAGGCACA----- mirR 22 1
-----ACATATGAGCACACAGGCACAC----- mirR 22 1
-----AATGGCACTCACTCATTG----- morR 18 1
-----AATGGCACTCACTCATTGAT morR 20 1
```

>mmu-mir-1893

```
CTGGCCGGGGCCGTTTCCCCAGAGCGGAGAGGTATCTGCTGCGCCTGAGATGAGTAAACTGTCGTTTCGGGGCGGGCGCTGGACGCCCTCGAAGCCGCTGCCGGTCTTCCGCTGTGAGGATCTGCCCGACCTGCACGAATA
----CGGGGCCGTTTCCCCAGA-----
CTGGCCGGGGCCGTTTCCCCAGAG-----
---GCCGGGGCCGTTTCCCCAGAG-----
---GCCGGGGCCGTTTCCCCAG-----
-----GGGCCGTTTCCCCAGAGC-----
-----GGGGCCGTTTCCCCAGAG-----
-----GGAGAGGTATCTGCTGCG-----
-----CGGAGAGGTATCTGCTGCG-----
-----TCCGCTGTGAGGATCTGC-----
-----GCTGTGAGGATCTGCCCG-----
-----TCCGCTGTGAGGATCTGCC-----
-----TTCCGCTGTGAGGATCTG-----
-----CGCTGTGAGGATCTGCC-----
-----CCGCTGTGAGGATCTGCC-----
-----TGCCCGACCTGCACGAAT-----
-----GACCTGCACGAATA-----
-----CCGACCTGCACGAATA-----
-----GCCCGACCTGCACGAATA-----
```

>mmu-mir-3070b

```
CCTTGAACCTGGGATCCTCCCCATGATCTTCTGGTGCTATGGTCAGGGGTAGATTCCTT species len reads
--TGAACCTGGGATCCTCCC----- mirL 18 3
--CTTGAACCTGGGATCCTC----- mirL 18 1
CCTTGAACCTGGGATCCTC----- mirL 19 1
-----ATCTTCTGGTGCTATGGT----- mirR 18 26
-----TCTTCTGGTGCTATGGTC----- mirR 18 1
-----GGTCAGGGGTAGATTCCTT morR 19 1
```

>mmu-mir-3104

```
GAAAGGCCAACTAGGGGGCAGGAGCCGGAGCCCTCTGCTGAACTGACAGACGCTCTGCTTTGCTCCCCAGATCTCGATCCATCAGTGGTGCGTCCTCAGGCC species len reads
GAAAGGCCAACTAGGGGG----- morL 18 3
--AAGGCCAACTAGGGGGCA----- morL 18 1
GAAAGGCCAACTAGGGGGCA----- morL 20 1
GAAAGGCCAACTAGGGGGC----- morL 19 1
-----GCCAACTAGGGGGCAGGA----- morL 18 1
-----GAGCCGGAGCCCTCTGCT----- mirL 18 12
-----CAGGAGCCGGAGCCCTCTGC----- mirL 20 1
-----ACTGACAGACGCTCTGCTTTGCT----- loop 23 2
-----TCCCCAGATCTCGATCC----- mirR 18 3
-----TGCTCCCCAGATCTCGATC----- mirR 20 1
-----CAGTGGTGCGTCCTCAGG-- morR 18 1
-----ATCAGTGGTGCGTCCTCAGGCC morR 22 1
-----CCATCAGTGGTGCGTCCT-- morR 18 1
-----TCCATCAGTGGTGCGTCCTCAG--- morR 22 1
-----ATCAGTGGTGCGTCCTCA--- morR 18 1
-----AGTGGTGCGTCCTCAGGCC morR 19 1
```

>mmu-mir-3093

```
CGAGCTCGGCTCTGCCGACCCCGGGAGCTCACACTCGACCTTCCAGAGAAGGGTGTGGACACCGTGGGAGGTTGGGGAGGCCTCG species len reads
CGAGCTCGGCTCTGCCG----- morL 18 1
-----ACCCCGGGAGCTCACAC----- mirL 18 7
-----CCCCGGGAGCTCACACT----- mirL 18 2
-----CCCGGGAGCTCACACTC----- mirL 18 1
-----CACCCCGGGAGCTCACA----- mirL 18 1
-----AGAAGGGTGTGGACACCG----- mirR 18 6
-----AGGGTGTGGACACCGTGG----- mirR 18 3
-----AAGGGTGTGGACACCGTGG----- mirR 18 1
-----AGAAGGGTGTGGACACCGTGG----- mirR 21 1
-----GAAGGGTGTGGACACCGT----- mirR 18 1
-----GAGGTTGGGGAGGCCTCG morR 18 1
-----GTGGGAGGTTGGGGAGGC---- morR 18 1
-----CGTGGGAGGTTGGGGAGGC---- morR 19 1
```

>mmu-mir-3059

```
GGTACGCCCTTTCCTCTCTGCCCATAGGGTGTAGCTCTAACTACCCCTCTAGGGAAGAGAAGGTTGGGTGAACAGCCTTACTATTTCTACAACCTCAGTAATTATCTGCAAACAC species len reads
-GTACGCCCTTTCCTCTCTG----- morL 19 1
GGTACGCCCTTTCCTCTC----- morL 18 1
-----GCCCCATAGGGTGTAGCT----- mirL 18 7
-----TGCCCCATAGGGTGTAGCT----- mirL 19 6
-----TCTGCCCATAGGGTGTAG----- mirL 18 1
-----TGCCCCATAGGGTGTAGC----- mirL 18 1
-----TCAGTAATTATCTGCAAAA--- mirR 18 7
-----AGTAATTATCTGCAAACAC mirR 19 1
-----CAGTAATTATCTGCAAAC-- mirR 18 1
```

>mmu-mir-691

```

TTCTTGCTGATTTATTTTGGCTTTCTTCTTGGGTCTGCTTTGAATATTCCTGAAGAGAGGCAGAAAATGTTATATTTAATATCCATATAG species len reads
-TCTTGCTGATTTATTTTGGC-----
TTCTTGCTGATTTATTTT-----
---TTGCTGATTTATTTTGGC-----
-----TGCTTTCTTCTTGGGTC-----
-----TTGCTTTCTTCTTGGGT-----
-----GCTTTCTTCTTGGGTCT-----
-----ATTCCTGAAGAGAGGCAGAAA-----
-----ATTCCTGAAGAGAGGCAGAA-----
-----TTCCTGAAGAGAGGCAGAA-----
-----ATTCCTGAAGAGAGGCAGAA-----
-----TCCTGAAGAGAGGCAGAAA-----
-----ATTCCTGAAGAGAGGCAG-----
-----ATATTCCTGAAGAGAGGC-----
-----TCCTGAAGAGAGGCAGAA-----
-----TATATTTAATATCCATATAG morR 20 1

```

>mmu-mir-3083

```

ATATATATAAAGTAAAGGCTGGGAATATTTTCAGAGATATATATGTATATCTCCGAAACATTCCAGCCTTTACTAAGCCCAATACAGTCAGTAACCTTTACAGGCCACCTT species len reads
---ATATAAAGTAAAGGCTGG-----
ATATATATAAAGTAAAGG-----
---ATAAAGTAAAGGCTGGGA-----
---TATATAAAGTAAAGGCTG-----
-----TGGGAATATTTTCAGAGAT-----
-----GGAATATTTTCAGAGATAT-----
-----CTGGGAATATTTTCAGAGA-----
-----AACCTTTACAGGCCACCT-----
-----ACCTTTACAGGCCACCTT-----
-----AGTAACCTTTACAGGCCAC--- mirR 19 1

```

>mmu-mir-669a-3

```

CATAACATACACACACATGTATAAACGCAAGCACAC species len reads
CATAACATACACACACATG----- mirR 19 6
CATAACATACACACACATGTAT----- mirR 22 3
-ATAACATACACACACATGTATA----- mirR 22 2
--TAACATACACACACATGTAT----- mirR 20 2
-ATAACATACACACACATGT----- mirR 19 1
CATAACATACACACACATGTA----- mirR 21 1
CATAACATACACACACACAT----- mirR 18 1
--TAACATACACACACATGT----- mirR 18 1
---AACATACACACACATGTAT----- mirR 19 1
-ATAACATACACACACATGTATA----- mirR 23 1
-----TGTATAAACGCAAGCAC----- morR 18 2
-----TGTATAAACGCAAGCAC----- morR 19 1

```



```
>mmu-mir-3106
ACCTTGTCCCCAGGGAAGCACAGGTGGCTCATTTAGAAGCAGCCATACACTCAGAGAGTGGCTGCCTATACATGGGCTTTCTGTGCTCCTCTCCTGTTGCCACGGACCCTCAAGGAAGGAGCCATGCAACTCG specie
-----GTCCCCAGGGAAGCACAG----- morL 1
ACCTTGTCCCCAGGGAAGCACAG----- morL 2
---TTGTCCCCAGGGAAGCAC----- morL 1
-----TCCCCAGGGAAGCACAGG----- morL 1
-----TGGCTCATTTAGAAGCAGCCA----- mirL 2
-----GCTCATTTAGAAGCAGCC----- mirL 1
-----TGGCTCATTTAGAAGCAGCC----- mirL 2
-----AGGAAGGAGCCATGCAAC--- mirR 1
-----AAGGAAGGAGCCATGCAA--- mirR 1
-----AAGGAGCCATGCAACTCG mirR 1
```

```
>mmu-mir-669a-2
TATAAACGCAAGCACACACAGACACA species len reads
-ATAAACGCAAGCACACAC----- mirR 18 6
---AACGCAAGCACACACAG----- mirR 19 1
---AACGCAAGCACACACAGAC--- mirR 21 1
---AACGCAAGCACACACACA----- mirR 18 1
TATAAACGCAAGCACACACAC----- mirR 21 1
---AACGCAAGCACACACAGACA-- mirR 22 1
---AAACGCAAGCACACACAGACACA mirR 25 1
---AACGCAAGCACACACAGACAC- mirR 23 1
```

```
>mmu-mir-467a-9
TGCCTGTGTGCGTAAGTGCCTGCATGTATATGCGTGTATATTTTATGCATATACATACACACACCTACACACACATGCACACAGACATGCGGGAATGGCCCTCACGGATCCATTTGAATGAAATGTGACC species 1
--CCTGTGTGCGTAAGTGCC----- mirL 18 1
TGCCTGTGTGCGTAAGTGCCTG----- mirL 22 1
----TGTGTGCGTAAGTGCCTGC----- mirL 19 1
-----TCCATTTGAATGAAATGT---- mirR 18 4
-----ATTTGAATGAAATGTGACC mirR 19 1
```

```
>mmu-mir-467a-1
GCCCCTATGTACGTGCTGTGTGCGTAAGTGCCTGCATGTATATGCGTGTATATTTTATGCATATACATACACACACCTACACACACATGCACACAGACATGCGGGAATAGCCCTCACGGTCCATTTGAATGATATG spe
--CCCTATGTACGTGCTGT----- mor
GCCCCTATGTACGTGCTG----- mor
-----CCTGTGTGCGTAAGTGCC----- mir
-----TGTGTGCGTAAGTGCCTGC----- mir
-----CGGTCCATTTGAATGATA-- mir
-----GTCCATTTGAATGATATG mir
```

```
>mmu-mir-467a-4
TGCCTGTGTGCGTAAGTGCCTGCATGTATATGCGTGTATATTTTATGCATATACATACACACACCTACACACACATGCACACAGACATGCGGGAATGGCCCTCACGGATCCATTTGAATGAAATGTGACC species 1
--CCTGTGTGCGTAAGTGCC----- mirL 18 1
TGCCTGTGTGCGTAAGTGCCTG----- mirL 22 1
```

```
-----TGTGTGCGTAAGTGCCTGC----- mirL 19 1
-----TCCATTTGAATGAAATGT---- mirR 18 4
-----ATTTGAATGAAATGTGACC mirR 19 1

>mmu-mir-467a-7
TGCTGTGTGCGTAAGTGCCTGCATGTATATGCGTGTATATTTTATGCATATACATACACACACCTACACACACATGCACACAGACATGCGGGAATGGCCCTCACGGATCCATTTGAATGAAATGTGACC species 1
--CCTGTGTGCGTAAGTGCC----- mirL 18 1
TGCTGTGTGCGTAAGTGCCTG----- mirL 22 1
-----TGTGTGCGTAAGTGCCTGC----- mirL 19 1
-----TCCATTTGAATGAAATGT---- mirR 18 4
-----ATTTGAATGAAATGTGACC mirR 19 1

>mmu-mir-669a-5
AATCCCTTAGAATGATAAGTG species len reads
-ATCCCTTAGAATGATAAG-- mirR 18 5
AATCCCTTAGAATGATAAG-- mirR 19 1
---CCCTTAGAATGATAAGTG mirR 18 1

>mmu-mir-467a-2
TGCTGTGTGCGTAAGTGCCTGCATGTATATGCGTGTATATTTTATGCATATACATACACACACCTACACACACATGCACACAGACATGCGGGAATGGCACTCACGGA species len reads
--CCTGTGTGCGTAAGTGCC----- mirL 18 1
TGCTGTGTGCGTAAGTGCCTG----- mirL 22 1
-----TGTGTGCGTAAGTGCCTGC----- mirL 19 1
-----GGGAATGGCACTCACGGA mirR 18 1

>mmu-mir-467a-3
ACATGCGGAAATGGCCTTTCACGGATCCATTTGAATGA species len reads
ACATGCGGAAATGGCCTT----- mirR 18 2
-----TTCACGGATCCATTTGAATGA morR 21 1

>mmu-mir-467a-6
ACATGCGGAAATGGCCTTTCACGGATCCATTTGAATGA species len reads
ACATGCGGAAATGGCCTT----- mirR 18 2
-----TTCACGGATCCATTTGAATGA morR 21 1

>mmu-mir-467a-5
TGCTGTGTGCGTAAGTGCCTGC species len reads
--CCTGTGTGCGTAAGTGCC--- mirL 18 1
TGCTGTGTGCGTAAGTGCCTG- mirL 22 1
-----TGTGTGCGTAAGTGCCTGC mirL 19 1

>mmu-mir-466b-7
ACTCATCAATCCATTGCG species len reads
ACTCATCAATCCATTGCG- mirR 18 2
-CTCATCAATCCATTGCG mirR 18 1
```

```
>mmu-mir-467a-8
TGCTGTGTGCGTAAGTGCCTGC species len reads
--CCTGTGTGCGTAAGTGCC--- mirL 18 1
TGCTGTGTGCGTAAGTGCCTG- mirL 22 1
----TGTGTGCGTAAGTGCCTGC mirL 19 1

>mmu-mir-467a-10
ACATGCGGAAATGGCCTTCACGGATCCATTTGAATGA species len reads
ACATGCGGAAATGGCCTT----- mirR 18 2
-----TTCACGGATCCATTTGAATGA morR 21 1

>mmu-mir-669a-12
AAGCACACATACACAGATACA species len reads
AAGCACACATACACAGATACA mirR 21 1
AAGCACACATACACAGATA-- mirR 19 1
--GCACACATACACAGATAC- mirR 18 1

>mmu-mir-669a-1
CCCTTTGAATGATAAGTGAT species len reads
CCCTTTGAATGATAAGTGAT mirR 20 1
CCCTTTGAATGATAAGTG-- mirR 18 1

>mmu-mir-466b-2
GTGTGTGTACATGTACATGTCT species len reads
GTGTGTGTACATGTACATGTCT mirL 22 1
---TGTGTACATGTACATGTC- mirL 18 1

>mmu-mir-466b-4
TTGAGTGATAAGTGACTT species len reads
TTGAGTGATAAGTGACTT mirR 18 1

>mmu-mir-669a-10
CCCTTTGAATGATAAGTG species len reads
CCCTTTGAATGATAAGTG mirR 18 1

>mmu-mir-669a-4
CCCTTTGAATGATAAGTG species len reads
CCCTTTGAATGATAAGTG mirR 18 1

>mmu-mir-669a-11
CCCTTTGAATGATAAGTG species len reads
CCCTTTGAATGATAAGTG mirR 18 1

>mmu-mir-669a-9
CCCTTTGAATGATAAGTG species len reads
CCCTTTGAATGATAAGTG mirR 18 1
```

```
>mmu-mir-669a-8
CCCTTTGAATGATAAGTG species len reads
CCCTTTGAATGATAAGTG mirR 18 1
```

```
>mmu-mir-466b-6
TTGAGTGATAAGTGACTT species len reads
TTGAGTGATAAGTGACTT mirR 18 1
```

```
>mmu-mir-669a-7
CCCTTTGAATGATAAGTG species len reads
CCCTTTGAATGATAAGTG mirR 18 1
```

```
>mmu-mir-669a-6
CCCTTTGAATGATAAGTG species len reads
CCCTTTGAATGATAAGTG mirR 18 1
```

```
>mmu-mir-466b-5
TTGAGTGATAAGTGACTT species len reads
TTGAGTGATAAGTGACTT mirR 18 1
```

>mmu-mir-124-2

|                                                                                                               | species | len | reads   |
|---------------------------------------------------------------------------------------------------------------|---------|-----|---------|
| AGATCAGAGACTCTGCTCTCCGTGTTACAGCGGACCTTGATTTAATGTCATACAATTAAGGCACGCGGTGAATGCCAAGAGCGGAGCCTACGGCTGCACTTGAAGGACA | morL    | 19  | 2       |
| -GATCAGAGACTCTGCTCTC-----                                                                                     | morL    | 18  | 1       |
| --ATCAGAGACTCTGCTCTC-----                                                                                     | morL    | 18  | 1       |
| AGATCAGAGACTCTGCTC-----                                                                                       | morL    | 18  | 1       |
| -GATCAGAGACTCTGCTCTCC-----                                                                                    | morL    | 20  | 1       |
| AGATCAGAGACTCTGCTCTC-----                                                                                     | morL    | 20  | 1       |
| -----CGTGTTCACAGCGGACCTTGA-----                                                                               | mirL    | 21  | 6324    |
| -----CGTGTTCACAGCGGACCTTGAT-----                                                                              | mirL    | 22  | 3074    |
| -----CGTGTTCACAGCGGACCTTG-----                                                                                | mirL    | 20  | 2173    |
| -----CGTGTTCACAGCGGACCTT-----                                                                                 | mirL    | 19  | 609     |
| -----CGTGTTCACAGCGGACCT-----                                                                                  | mirL    | 18  | 234     |
| -----GTGTTCACAGCGGACCTTGAT-----                                                                               | mirL    | 21  | 15      |
| -----TGTTTCACAGCGGACCTTGATTT-----                                                                             | mirL    | 22  | 13      |
| -----GTGTTCACAGCGGACCTTGA-----                                                                                | mirL    | 20  | 12      |
| -----TGTTTCACAGCGGACCTTGAT-----                                                                               | mirL    | 20  | 10      |
| -----TGTTTCACAGCGGACCTTGATT-----                                                                              | mirL    | 21  | 7       |
| -----TGTTTCACAGCGGACCTTG-----                                                                                 | mirL    | 18  | 5       |
| -----GTGTTCACAGCGGACCTTG-----                                                                                 | mirL    | 19  | 5       |
| -----TGTTTCACAGCGGACCTTGA-----                                                                                | mirL    | 19  | 4       |
| -----GTGTTCACAGCGGACCTT-----                                                                                  | mirL    | 18  | 4       |
| -----CCGTGTTCACAGCGGACCTTGA-----                                                                              | mirL    | 22  | 3       |
| -----GTTTCACAGCGGACCTTGAT-----                                                                                | mirL    | 19  | 3       |
| -----GTGTTCACAGCGGACCTTGATT-----                                                                              | mirL    | 22  | 1       |
| -----GTTTCACAGCGGACCTTGA-----                                                                                 | mirL    | 18  | 1       |
| -----CCGTGTTCACAGCGGACC-----                                                                                  | mirL    | 18  | 1       |
| -----CCGTGTTCACAGCGGACCTTG-----                                                                               | mirL    | 21  | 1       |
| -----CCGTGTTCACAGCGGACCTT-----                                                                                | mirL    | 20  | 1       |
| -----TAAGGCACGCGGTGAATGCCA-----                                                                               | mirR    | 21  | 3542163 |
| -----TAAGGCACGCGGTGAATGCCAA-----                                                                              | mirR    | 22  | 1624216 |
| -----TAAGGCACGCGGTGAATGCG-----                                                                                | mirR    | 19  | 1422723 |
| -----TAAGGCACGCGGTGAATGCC-----                                                                                | mirR    | 20  | 1128603 |
| -----TAAGGCACGCGGTGAATGCCAAG-----                                                                             | mirR    | 23  | 737701  |
| -----AAGGCACGCGGTGAATGCCA-----                                                                                | mirR    | 20  | 391278  |
| -----AAGGCACGCGGTGAATGCCAA-----                                                                               | mirR    | 21  | 155958  |
| -----TTAAGGCACGCGGTGAATGCCA-----                                                                              | mirR    | 22  | 145075  |
| -----AAGGCACGCGGTGAATGCC-----                                                                                 | mirR    | 19  | 118822  |
| -----AAGGCACGCGGTGAATGCCAAG-----                                                                              | mirR    | 22  | 94692   |
| -----AAGGCACGCGGTGAATGCG-----                                                                                 | mirR    | 18  | 88926   |
| -----TTAAGGCACGCGGTGAATGCC-----                                                                               | mirR    | 21  | 85109   |
| -----TAAGGCACGCGGTGAATG-----                                                                                  | mirR    | 18  | 72047   |
| -----TAAGGCACGCGGTGAATGCCAAGA-----                                                                            | mirR    | 24  | 71082   |
| -----TTAAGGCACGCGGTGAATGCCAA-----                                                                             | mirR    | 23  | 64459   |
| -----TTAAGGCACGCGGTGAATGCG-----                                                                               | mirR    | 20  | 43063   |
| -----TTAAGGCACGCGGTGAATGCCAAG-----                                                                            | mirR    | 24  | 20845   |
| -----AAGGCACGCGGTGAATGCCAAGA-----                                                                             | mirR    | 23  | 10083   |

```

-----TTAAGGCACGCGGTGAAT----- mirR 18 8408
-----TTAAGGCACGCGGTGAATG----- mirR 19 4100
-----AAGGCACGCGGTGAATGCCAAGAGC----- mirR 25 1012
-----AGGCACGCGGTGAATGCCA----- mirR 19 963
-----GGCACGCGGTGAATGCCA----- mirR 18 527
-----AGGCACGCGGTGAATGCCAA----- mirR 20 491
-----ATTAAGGCACGCGGTGAATGCC----- mirR 22 332
-----AGGCACGCGGTGAATGCCAAG----- mirR 21 316
-----GGCACGCGGTGAATGCCAA----- mirR 19 236
-----AATTAAGGCACGCGGTGAATGCC----- mirR 23 205
-----AGGCACGCGGTGAATGCC----- mirR 18 191
-----ATTAAGGCACGCGGTGAATGCCA----- mirR 23 147
-----GGCACGCGGTGAATGCCAAG----- mirR 20 111
-----ATTAAGGCACGCGGTGAATGCCAAG----- mirR 25 105
-----ATTAAGGCACGCGGTGAATGCCAA----- mirR 24 97
-----AATTAAGGCACGCGGTGAATGCCA----- mirR 24 74
-----ATTAAGGCACGCGGTGAATGC----- mirR 21 69
-----ATTAAGGCACGCGGTGAA----- mirR 18 46
-----AGGCACGCGGTGAATGCCAAGA----- mirR 22 44
-----AATTAAGGCACGCGGTGAATGC----- mirR 22 43
-----AATTAAGGCACGCGGTGAATGCCAA----- mirR 25 35
-----AATTAAGGCACGCGGTGAA----- mirR 19 21
-----ATTAAGGCACGCGGTGAAT----- mirR 19 16
-----AATTAAGGCACGCGGTGAATGCCAAG----- mirR 26 14
-----GGCACGCGGTGAATGCCAAGA----- mirR 21 12
-----AATTAAGGCACGCGGTGAAT----- mirR 20 6
-----AGGCACGCGGTGAATGCCAAGAGC----- mirR 24 1
-----AGGCACGCGGTGAATGCCAAGAG----- mirR 23 1
-----GAGCGGAGCCTACGGCTGCACTT----- morR 23 3
-----GAGCGGAGCCTACGGCTGCACTTG----- morR 24 1
-----GAGCGGAGCCTACGGCTGCACT----- morR 22 1
-----GAGCGGAGCCTACGGCTGCACTTGAAGGACA morR 31 1
-----CAAGAGCGGAGCCTACGG----- morR 18 1

```

>mmu-mir-124-1

```

CAGGAGAAAGGCCTCTCTCCGTGTTACAGCGGACCTTGATTAAATGTCCATACAATTAAGGCACGCGGTGAATGCCAAGAAATGGGGCTGTCTGAGCACCTTGGGTCCACGAG species len reads
-AGGAGAAAGGCCTCTCTCTCC----- morL 21 2
CAGGAGAAAGGCCTCTCTCTCC----- morL 22 1
-AGGAGAAAGGCCTCTCTCTC----- morL 20 1
-----AAAGGCCTCTCTCTCCGT----- morL 18 1
-----CGTGTTCACAGCGGACCTTGA----- mirL 21 6324
-----CGTGTTCACAGCGGACCTTGAT----- mirL 22 3074
-----CGTGTTCACAGCGGACCTTG----- mirL 20 2173
-----CGTGTTCACAGCGGACCTT----- mirL 19 609
-----CGTGTTCACAGCGGACCT----- mirL 18 234
-----GTGTTCACAGCGGACCTTGAT----- mirL 21 15

```

```

-----TGTTACAGCGGACCTTGATT----- mirL 22 13
-----GTGTTACAGCGGACCTTGA----- mirL 20 12
-----TGTTACAGCGGACCTTGAT----- mirL 20 10
-----TGTTACAGCGGACCTTGATT----- mirL 21 7
-----TGTTACAGCGGACCTTG----- mirL 18 5
-----GTGTTACAGCGGACCTTG----- mirL 19 5
-----GTGTTACAGCGGACCTT----- mirL 18 4
-----TGTTACAGCGGACCTTGA----- mirL 19 4
-----GTTACAGCGGACCTTGAT----- mirL 19 3
-----CCGTGTTACAGCGGACCTTGA----- mirL 22 3
-----CCGTGTTACAGCGGACC----- mirL 18 1
-----CCGTGTTACAGCGGACCTT----- mirL 20 1
-----GTGTTACAGCGGACCTTGATT----- mirL 22 1
-----CCGTGTTACAGCGGACCTTG----- mirL 21 1
-----GTTACAGCGGACCTTGA----- mirL 18 1
-----TAAGGCACGCGGTGAATGCCA----- mirR 21 3542163
-----TAAGGCACGCGGTGAATGCCAA----- mirR 22 1624216
-----TAAGGCACGCGGTGAATGC----- mirR 19 1422723
-----TAAGGCACGCGGTGAATGCC----- mirR 20 1128603
-----TAAGGCACGCGGTGAATGCCAAG----- mirR 23 737677
-----AAGGCACGCGGTGAATGCCA----- mirR 20 391278
-----AAGGCACGCGGTGAATGCCAA----- mirR 21 155958
-----TTAAGGCACGCGGTGAATGCCA----- mirR 22 145075
-----AAGGCACGCGGTGAATGCC----- mirR 19 118839
-----AAGGCACGCGGTGAATGCCAAG----- mirR 22 94692
-----AAGGCACGCGGTGAATGC----- mirR 18 88926
-----TTAAGGCACGCGGTGAATGCC----- mirR 21 85109
-----TAAGGCACGCGGTGAATG----- mirR 18 72047
-----TAAGGCACGCGGTGAATGCCAAGA----- mirR 24 71094
-----TTAAGGCACGCGGTGAATGCCAA----- mirR 23 64459
-----TTAAGGCACGCGGTGAATGC----- mirR 20 43063
-----TTAAGGCACGCGGTGAATGCCAAG----- mirR 24 20845
-----AAGGCACGCGGTGAATGCCAAGA----- mirR 23 10083
-----TTAAGGCACGCGGTGAAT----- mirR 18 8408
-----TTAAGGCACGCGGTGAATG----- mirR 19 4100
-----AGGCACGCGGTGAATGCCA----- mirR 19 963
-----AAGGCACGCGGTGAATGCCAAGAA----- mirR 24 652
-----GGCACGCGGTGAATGCCA----- mirR 18 527
-----AGGCACGCGGTGAATGCCAA----- mirR 20 491
-----ATTAAGGCACGCGGTGAATGCC----- mirR 22 332
-----AGGCACGCGGTGAATGCCAAG----- mirR 21 316
-----GGCACGCGGTGAATGCCAA----- mirR 19 236
-----AATTAAGGCACGCGGTGAATGCC----- mirR 23 205
-----AGGCACGCGGTGAATGCC----- mirR 18 191
-----ATTAAGGCACGCGGTGAATGCCA----- mirR 23 147
-----GGCACGCGGTGAATGCCAAG----- mirR 20 111

```

```

-----ATTAAGGCACGCGGTGAATGCCAAG----- mirR 25 105
-----ATTAAGGCACGCGGTGAATGCCAA----- mirR 24 97
-----AATTAAGGCACGCGGTGAATGCCA----- mirR 24 74
-----ATTAAGGCACGCGGTGAATGC----- mirR 21 69
-----ATTAAGGCACGCGGTGAA----- mirR 18 46
-----AGGCACGCGGTGAATGCCAAGA----- mirR 22 44
-----AATTAAGGCACGCGGTGAATGC----- mirR 22 43
-----AATTAAGGCACGCGGTGAATGCCAA----- mirR 25 35
-----AATTAAGGCACGCGGTGAA----- mirR 19 21
-----ATTAAGGCACGCGGTGAAT----- mirR 19 16
-----AATTAAGGCACGCGGTGAATGCCAAG----- mirR 26 14
-----GGCACGCGGTGAATGCCAAGA----- mirR 21 12
-----AATTAAGGCACGCGGTGAAT----- mirR 20 6
-----AGGCACGCGGTGAATGCCAAGAA----- mirR 23 3
-----GGCACGCGGTGAATGCCAAGAA----- mirR 22 1
-----GAATGGGGCTGTCTGAGCACCTTGGGTCCACGA----- morR 33 1
-----AATGGGGCTGTCTGAGCAC----- morR 19 1
-----GAATGGGGCTGTCTGAGCACCTTGGGTCCACGAG----- morR 34 1
-----GAATGGGGCTGTCTGAGCA----- morR 19 1

```

>mmu-mir-124-3

```

CGCCGCAGCCCTGAGGGCCCTCTGCGTGTTACAGCGGACCTTGATTTAATGTCTATACAATTAAGGCACGCGGTGAATGCCAAGAGAGGGCGCCTCCGCCGCTC species len reads
-----AGCCCTGAGGGCCCTCTG----- morL 19 2
-----CAGCCCTGAGGGCCCTC----- morL 18 1
CGCCGCAGCCCTGAGGGCCCTC----- morL 23 1
-----CCGCAGCCCTGAGGGCCCTCTG----- morL 23 1
-----GCAGCCCTGAGGGCCCTCTG----- morL 21 1
CGCCGCAGCCCTGAGGGCCCTCTG----- morL 25 1
-----CGTGTTACAGCGGACCTTGA----- mirL 21 6324
-----CGTGTTACAGCGGACCTTGAT----- mirL 22 3074
-----CGTGTTACAGCGGACCTTG----- mirL 20 2173
-----CGTGTTACAGCGGACCTT----- mirL 19 609
-----CGTGTTACAGCGGACCT----- mirL 18 234
-----GTGTTACAGCGGACCTTGAT----- mirL 21 15
-----TGTTACAGCGGACCTTGATTT----- mirL 22 13
-----GTGTTACAGCGGACCTTGA----- mirL 20 12
-----TGTTACAGCGGACCTTGAT----- mirL 20 10
-----TGTTACAGCGGACCTTGATTT----- mirL 21 7
-----TGTTACAGCGGACCTTG----- mirL 18 5
-----GTGTTACAGCGGACCTTG----- mirL 19 5
-----GTGTTACAGCGGACCTT----- mirL 18 4
-----TGTTACAGCGGACCTTGA----- mirL 19 4
-----GTTACAGCGGACCTTGAT----- mirL 19 3
-----GTGTTACAGCGGACCTTGATTT----- mirL 22 1
-----GTTACAGCGGACCTTGA----- mirL 18 1
-----GCGTGTTACAGCGGACCTTG----- mirL 21 1

```



```
-----TAAGGCACGCGGTGAATGCCA----- mirR 21 3542162
-----TAAGGCACGCGGTGAATGCCAA----- mirR 22 1624156
-----TAAGGCACGCGGTGAATGC----- mirR 19 1422723
-----TAAGGCACGCGGTGAATGCC----- mirR 20 1128603
-----TAAGGCACGCGGTGAATGCCAAG----- mirR 23 737705
-----AAGGCACGCGGTGAATGCCA----- mirR 20 391278
-----AAGGCACGCGGTGAATGCCAA----- mirR 21 155958
-----TTAAGGCACGCGGTGAATGCCA----- mirR 22 145075
-----AAGGCACGCGGTGAATGCC----- mirR 19 118839
-----AAGGCACGCGGTGAATGCCAAG----- mirR 22 94692
-----AAGGCACGCGGTGAATGC----- mirR 18 88926
-----TTAAGGCACGCGGTGAATGCC----- mirR 21 85109
-----TAAGGCACGCGGTGAATG----- mirR 18 72047
-----TAAGGCACGCGGTGAATGCCAAGA----- mirR 24 71097
-----TTAAGGCACGCGGTGAATGCCAA----- mirR 23 64458
-----TTAAGGCACGCGGTGAATGC----- mirR 20 43063
-----TTAAGGCACGCGGTGAATGCCAAG----- mirR 24 20845
-----AAGGCACGCGGTGAATGCCAAGA----- mirR 23 10083
-----TTAAGGCACGCGGTGAAT----- mirR 18 8408
-----TTAAGGCACGCGGTGAATG----- mirR 19 4100
-----AGGCACGCGGTGAATGCCA----- mirR 19 963
-----GGCACGCGGTGAATGCCA----- mirR 18 527
-----AGGCACGCGGTGAATGCCAA----- mirR 20 491
-----AAGGCACGCGGTGAATGCCAAGAG----- mirR 24 479
-----ATTAAGGCACGCGGTGAATGCC----- mirR 22 332
-----AGGCACGCGGTGAATGCCAAG----- mirR 21 316
-----GGCACGCGGTGAATGCCAA----- mirR 19 236
-----AATTAAGGCACGCGGTGAATGCC----- mirR 23 205
-----AGGCACGCGGTGAATGCC----- mirR 18 191
-----ATTAAGGCACGCGGTGAATGCCA----- mirR 23 147
-----GGCACGCGGTGAATGCCAAG----- mirR 20 111
-----ATTAAGGCACGCGGTGAATGCCAAG----- mirR 25 105
-----ATTAAGGCACGCGGTGAATGCCAA----- mirR 24 97
-----AATTAAGGCACGCGGTGAATGCCA----- mirR 24 74
-----ATTAAGGCACGCGGTGAATGC----- mirR 21 69
-----ATTAAGGCACGCGGTGAA----- mirR 18 46
-----AGGCACGCGGTGAATGCCAAGA----- mirR 22 44
-----AATTAAGGCACGCGGTGAATGC----- mirR 22 43
-----AATTAAGGCACGCGGTGAATGCCAA----- mirR 25 35
-----AATTAAGGCACGCGGTGAA----- mirR 19 21
-----ATTAAGGCACGCGGTGAAT----- mirR 19 16
-----AATTAAGGCACGCGGTGAATGCCAAG----- mirR 26 14
-----GGCACGCGGTGAATGCCAAGA----- mirR 21 12
-----AATTAAGGCACGCGGTGAAT----- mirR 20 6
-----AGGCACGCGGTGAATGCCAAGAG----- mirR 23 1
-----CAAGAGAGGCGCCTCCGCC----- morR 19 1
```

```

-----AAGAGAGGCGCCTCCGCCGCTC morR 22 1

>mmu-mir-29a
ATGACTGATTCTTTGGTGTTCAGAGTCAATAGAATTTCTAGCACCATCTGAAATCGGTTATAAT species len reads
---ACTGATTCTTTGGTGTTC----- mirL 20 2411
---ACTGATTCTTTGGTGTTCAG----- mirL 22 1639
---ACTGATTCTTTGGTGTTC----- mirL 21 1305
---ACTGATTCTTTGGTGTTCAG----- mirL 23 581
---ACTGATTCTTTGGTGTTC----- mirL 19 500
---TGATTCTTTGGTGTTCAG----- mirL 20 6
---TGATTCTTTGGTGTTC----- mirL 19 5
---CTGATTCTTTGGTGTTCAG----- mirL 21 4
---CTGATTCTTTGGTGTTC----- mirL 19 4
---GACTGATTCTTTGGTGTTC----- mirL 22 4
---TGATTCTTTGGTGTTC----- mirL 18 4
---GATTCTTTGGTGTTCAG----- mirL 19 3
---TGATTCTTTGGTGTTCAGAGTC----- mirL 24 3
---TGATTCTTTGGTGTTCAG----- mirL 21 3
---GATTCTTTGGTGTTC----- mirL 18 1
---CTGATTCTTTGGTGTTC----- mirL 20 1
ATGACTGATTCTTTGG----- mirL 18 1
---GACTGATTCTTTGGTGTTCAG----- mirL 24 1
---GATTCTTTGGTGTTCAGAGTC----- mirL 23 1
---GACTGATTCTTTGGTGTTCAG----- mirL 23 1
---GACTGATTCTTTGGTGTTC----- mirL 21 1
---CTGATTCTTTGGTGTTCAGAGTC----- mirL 25 1
---GATTCTTTGGTGTTCAGAGT----- mirL 22 1
---CTGATTCTTTGGTGTTC----- mirL 18 1
---TGACTGATTCTTTGGT----- mirL 18 1
-----AGTCAATAGAATTTCTA----- loop 18 1
-----TAGCACCATCTGAAATCGGTTA----- mirR 22 2681953
-----TAGCACCATCTGAAATCGGTT----- mirR 21 1286410
-----AGCACCATCTGAAATCGGTTA----- mirR 21 135280
-----AGCACCATCTGAAATCGGTT----- mirR 20 78061
-----CTAGCACCATCTGAAATCGGTT----- mirR 22 67674
-----TAGCACCATCTGAAATCGGTTAT----- mirR 23 58184
-----TAGCACCATCTGAAATCGGT----- mirR 20 47988
-----CTAGCACCATCTGAAATCGGTTA----- mirR 23 41453
-----TAGCACCATCTGAAATCGG----- mirR 19 29787
-----TAGCACCATCTGAAATCG----- mirR 18 19166
-----CTAGCACCATCTGAAATC----- mirR 18 5342
-----AGCACCATCTGAAATCGGTTAT----- mirR 22 4245
-----CTAGCACCATCTGAAATCGGT----- mirR 21 3649
-----CTAGCACCATCTGAAATCG----- mirR 19 3438
-----AGCACCATCTGAAATCGGT----- mirR 19 2478
-----TAGCACCATCTGAAATCGGTTATA----- mirR 24 2462

```

```

-----GCACCATCTGAAATCGGTTA---- mirR 20 1042
-----CTAGCACCATCTGAAATCGG----- mirR 20 810
-----CTAGCACCATCTGAAATCGGTTAT--- mirR 24 626
-----GCACCATCTGAAATCGGTT----- mirR 19 523
-----AGCACCATCTGAAATCGG----- mirR 18 339
-----AGCACCATCTGAAATCGGTTATAAT mirR 25 199
-----AGCACCATCTGAAATCGGTTATA-- mirR 23 172
-----TCTAGCACCATCTGAAATCGGTT----- mirR 23 112
-----TCTAGCACCATCTGAAATCGGTTA--- mirR 24 102
-----TCTAGCACCATCTGAAATCGGTTAT--- mirR 25 69
-----CACCATCTGAAATCGGTTA----- mirR 19 55
-----TCTAGCACCATCTGAAATCGGT----- mirR 22 44
-----GCACCATCTGAAATCGGTTAT--- mirR 21 34
-----CACCATCTGAAATCGGTT----- mirR 18 25
-----TCTAGCACCATCTGAAATC----- mirR 19 10
-----GCACCATCTGAAATCGGT----- mirR 18 7
-----TCTAGCACCATCTGAAATCGG----- mirR 21 4
-----GCACCATCTGAAATCGGTTATA-- mirR 22 2
-----TTCTAGCACCATCTGAAATC----- mirR 20 2
-----CACCATCTGAAATCGGTTAT--- mirR 20 2
-----TCTAGCACCATCTGAAATCG----- mirR 20 2
-----TTCTAGCACCATCTGAAATCGGTTA--- mirR 25 1

```

>mmu-mir-128-1

| Species                                                                                            | len | reads   |
|----------------------------------------------------------------------------------------------------|-----|---------|
| CTTCCTGAGCTGTTGGATTTCGGGGCCGTAGCACTGTCTGAGAGGTTTACATTTCTCACAGTGAACCGGTCTCTTTTTTCAGCTGCTTCCTGACTTCT | 20  | 2       |
| CTTCCTGAGCTGTTGGATTTC-----                                                                         | 18  | 1       |
| --TCCTGAGCTGTTGGATTTC-----                                                                         | 18  | 1       |
| -----CGGGGCCGTAGCACTGTCTGA-----                                                                    | 21  | 327     |
| -----CGGGGCCGTAGCACTGTCT-----                                                                      | 19  | 70      |
| -----CGGGGCCGTAGCACTGTCTGAG-----                                                                   | 22  | 61      |
| -----CGGGGCCGTAGCACTGTCTG-----                                                                     | 20  | 36      |
| -----CGGGGCCGTAGCACTGTCTGAGA-----                                                                  | 23  | 21      |
| -----GGGGCCGTAGCACTGTCTGAG-----                                                                    | 21  | 1       |
| -----GGGGCCGTAGCACTGTCTGA-----                                                                     | 20  | 1       |
| -----TCACAGTGAACCGGTCTCTTT-----                                                                    | 21  | 1872017 |
| -----TCACAGTGAACCGGTCTCTTTT-----                                                                   | 22  | 240977  |
| -----TCACAGTGAACCGGTCTC-----                                                                       | 18  | 213820  |
| -----TCACAGTGAACCGGTCTCT-----                                                                      | 20  | 180259  |
| -----TCACAGTGAACCGGTCTCT-----                                                                      | 19  | 112397  |
| -----CACAGTGAACCGGTCTCTTT-----                                                                     | 20  | 75236   |
| -----TCACAGTGAACCGGTCTCTTTTTC-----                                                                 | 24  | 66866   |
| -----TCACAGTGAACCGGTCTCTTTTT-----                                                                  | 23  | 36581   |
| -----CACAGTGAACCGGTCTCTTTT-----                                                                    | 21  | 12274   |
| -----CACAGTGAACCGGTCTCT-----                                                                       | 19  | 7689    |
| -----CACAGTGAACCGGTCTCTTTTTC-----                                                                  | 23  | 3225    |
| -----CACAGTGAACCGGTCTCT-----                                                                       | 18  | 3191    |

```

-----CACAGTGAACCGGTCTCTTTTT----- mirR 22 2300
-----CTCACAGTGAACCGGTCTCTTT----- mirR 22 906
-----ACAGTGAACCGGTCTCTTT----- mirR 19 586
-----CTCACAGTGAACCGGTCTC----- mirR 19 419
-----CTCACAGTGAACCGGTCTCTT----- mirR 21 398
-----CTCACAGTGAACCGGTCTTTTT----- mirR 23 260
-----CAGTGAACCGGTCTCTTT----- mirR 18 254
-----CTCACAGTGAACCGGTCTCT----- mirR 20 153
-----CTCACAGTGAACCGGTCT----- mirR 18 128
-----ACAGTGAACCGGTCTCTTT----- mirR 20 123
-----ACAGTGAACCGGTCTCTT----- mirR 18 74
-----CTCACAGTGAACCGGTCTTTTTTC----- mirR 25 67
-----TCTCACAGTGAACCGGTCTCTTT----- mirR 23 60
-----CAGTGAACCGGTCTCTTT----- mirR 19 46
-----CACAGTGAACCGGTCTCTTTTTCAG----- mirR 25 44
-----ACAGTGAACCGGTCTCTTTTT----- mirR 21 37
-----TCTCACAGTGAACCGGTCTC----- mirR 20 36
-----TCTCACAGTGAACCGGTCTCTT----- mirR 22 30
-----CAGTGAACCGGTCTCTTTTT----- mirR 20 19
-----ACAGTGAACCGGTCTCTTTTTTC----- mirR 22 13
-----TCTCACAGTGAACCGGTCTCT----- mirR 21 12
-----TCTCACAGTGAACCGGTCT----- mirR 19 11
-----TCTCACAGTGAACCGGTCTCTTT----- mirR 24 6
-----TCTCACAGTGAACCGGTCTC----- mirR 18 4
-----TTCTCACAGTGAACCGGTCT----- mirR 20 2
-----CAGTGAACCGGTCTCTTTTTTCA----- mirR 22 2
-----TTCTCACAGTGAACCGGTCTC----- mirR 21 1
-----TTCTCACAGTGAACCGGTCTCTTT----- mirR 24 1
-----ACAGTGAACCGGTCTCTTTTTTCA----- mirR 23 1
-----CAGTGAACCGGTCTCTTTTTTC----- mirR 21 1
-----TTCAGCTGCTTCCTGACT----- morR 18 1
-----TCAGCTGCTTCCTGACTTCT morR 20 1
-----TTTTCAGCTGCTTCCTGA----- morR 18 1
-----CAGCTGCTTCCTGACTTCT morR 19 1

```

>mmu-mir-128-2

```

CCCCGGCAGCCACTGTGCAGTGGGAAGGGGGCCGATGCACTGTAAGAGAGTGAGTAGCAGGTCTCACAGTGAACCGGTCTCTTTCCCTACTGTGTCAAACCTCTA species len reads
-----AGCCACTGTGCAGTGGGAAG----- morL 20 4
-----AGCCACTGTGCAGTGGGA----- morL 18 1
-----GGCAGCCACTGTGCAGTGGGAAG----- morL 23 1
-----CAGCCACTGTGCAGTGGG----- morL 18 1
-----GCCACTGTGCAGTGGGAAG----- morL 19 1
-----CAGCCACTGTGCAGTGGGAAG----- morL 21 1
CCCCGGCAGCCACTGTGCAGTGGGAAG----- morL 27 1
-----GGGGCCGATGCACTGTAAGA----- mirL 21 144
-----GGGGCCGATGCACTGTAA----- mirL 19 133

```

```

-----GGGGGCCGATGCACTGTAAGAG----- mirL 22 95
-----GGGGGCCGATGCACTGTAAGAGA----- mirL 23 77
-----GGGGGCCGATGCACTGTAAG----- mirL 20 51
-----GGGGGCCGATGCACTGTAA----- mirL 20 32
-----GGGGGCCGATGCACTGTAAGA----- mirL 22 22
-----GGGGGCCGATGCACTGTAAGAG----- mirL 23 5
-----AGGGGGGCCGATGCACTGTAA----- mirL 21 5
-----GGGGGCCGATGCACTGTAAG----- mirL 21 5
-----GGGGGCCGATGCACTGTAAGA----- mirL 20 3
-----GGGGGCCGATGCACTGTA----- mirL 19 2
-----AGGGGGGCCGATGCACTGT----- mirL 19 1
-----GGGGGCCGATGCACTGTAAGAGA----- mirL 22 1
-----GGGGGCCGATGCACTGTAAGA----- mirL 19 1
-----GGGGGCCGATGCACTGTAAGAGAG----- mirL 22 1
-----GGGGGCCGATGCACTGTAA----- mirL 18 1
-----AGGGGGGCCGATGCACTGTA----- mirL 20 1
-----TCACAGTGAACCGGTCTCTTT----- mirR 21 1871618
-----TCACAGTGAACCGGTCTCTTTC----- mirR 22 238581
-----TCACAGTGAACCGGTCTCT----- mirR 18 213820
-----TCACAGTGAACCGGTCTCTT----- mirR 20 180259
-----TCACAGTGAACCGGTCTCT----- mirR 19 111561
-----CACAGTGAACCGGTCTCTTT----- mirR 20 75212
-----TCACAGTGAACCGGTCTCTTTCC----- mirR 23 73182
-----TCACAGTGAACCGGTCTCTTTCCC----- mirR 24 34345
-----CACAGTGAACCGGTCTCTTTTC----- mirR 21 7943
-----CACAGTGAACCGGTCTCTT----- mirR 19 7652
-----CACAGTGAACCGGTCTCTTTCC----- mirR 22 3327
-----CACAGTGAACCGGTCTCT----- mirR 18 3191
-----CTCACAGTGAACCGGTCTCTTTC----- mirR 23 1935
-----CACAGTGAACCGGTCTCTTTCCC----- mirR 23 1459
-----CTCACAGTGAACCGGTCTCTTT----- mirR 22 747
-----ACAGTGAACCGGTCTCTTT----- mirR 19 586
-----CTCACAGTGAACCGGTCTCT----- mirR 19 416
-----CTCACAGTGAACCGGTCTCTT----- mirR 21 398
-----CAGTGAACCGGTCTCTTT----- mirR 18 254
-----CTCACAGTGAACCGGTCTCT----- mirR 20 153
-----CTCACAGTGAACCGGTCT----- mirR 18 128
-----TCTCACAGTGAACCGGTCTCTTTCC----- mirR 25 84
-----ACAGTGAACCGGTCTCTT----- mirR 18 74
-----CTCACAGTGAACCGGTCTCTTTCC----- mirR 24 66
-----ACAGTGAACCGGTCTCTTTC----- mirR 20 60
-----TCTCACAGTGAACCGGTCTCTTT----- mirR 23 60
-----CAGTGAACCGGTCTCTTTCC----- mirR 19 40
-----TCTCACAGTGAACCGGTCTCT----- mirR 20 36
-----ACAGTGAACCGGTCTCTTTCC----- mirR 21 35
-----CACAGTGAACCGGTCTCTTTCCCTAC----- mirR 26 33

```

```

-----TCTCACAGTGAACCGGTCTCTT----- mirR 22 30
-----TCTCACAGTGAACCGGTCTCT----- mirR 21 12
-----TCTCACAGTGAACCGGTCT----- mirR 19 11
-----CAGTGAACCGGTCTCTTTCC----- mirR 20 9
-----TCTCACAGTGAACCGGTCTCTTTC----- mirR 24 8
-----GTCTCACAGTGAACCGGTCTCTTTC----- mirR 25 3
-----GTCTCACAGTGAACCGGTCTCTTT----- mirR 24 3
-----GTCTCACAGTGAACCGGTCTCTT----- mirR 23 2
-----ACAGTGAACCGGTCTCTTTCCC----- mirR 22 2
-----GTCTCACAGTGAACCGGTCTCT----- mirR 22 1
-----GTCTCACAGTGAACCGGTCT----- mirR 20 1
-----GTCTCACAGTGAACCGGTC----- mirR 19 1
-----CAGTGAACCGGTCTCTTTCCC----- mirR 21 1
-----GTCTCACAGTGAACCGGT----- mirR 18 1
-----TCCCTACTGTGTCAAAC----- morR 18 1
-----TCCCTACTGTGTCAAAC----- morR 18 1
-----CCCTACTGTGTCAAAC----- morR 18 1
-----TACTGTGTCAAACCTCTA morR 18 1

```

>mmu-mir-9-1

```

GGCGGCCAGGAGCGGGGTTGGTTGTTATCTTTGGTTATCTAGCTGTATGAGTGGTGTGGAGTCTTCATAAAGCTAGATAACCGAAAGTAAAA species len reads
-----AGGAGGCGGGGTTGGTTGTT----- morL 20 1
-----GGAGGCGGGGTTGGTTGTTAT----- morL 21 1
-----GCCAGGAGGCGGGGTTGGTTGTTA----- morL 24 1
-----CCAGGAGGCGGGGTTGGTTGTTA----- morL 23 1
-----AGGAGGCGGGGTTGGTTGTTA----- morL 21 1
GGCGGCCAGGAGGCGGGGTTGGTTGTTA----- morL 28 1
-----TCTTTGGTTATCTAGCTGTAT----- mirL 21 1486812
-----TCTTTGGTTATCTAGCTGTATGA----- mirL 23 253663
-----TCTTTGGTTATCTAGCTGTATG----- mirL 22 228204
-----TCTTTGGTTATCTAGCTGTA----- mirL 20 172509
-----CTTTGGTTATCTAGCTGTAT----- mirL 20 153540
-----TCTTTGGTTATCTAGCTGT----- mirL 19 88682
-----CTTTGGTTATCTAGCTGTATGA----- mirL 22 29291
-----CTTTGGTTATCTAGCTGTATG----- mirL 21 23447
-----CTTTGGTTATCTAGCTGTA----- mirL 19 20535
-----CTTTGGTTATCTAGCTGT----- mirL 18 10626
-----TTTGGTTATCTAGCTGTAT----- mirL 19 1311
-----TTTGGTTATCTAGCTGTATGA----- mirL 21 640
-----ATCTTTGGTTATCTAGCTGTAT----- mirL 22 513
-----TTGGTTATCTAGCTGTAT----- mirL 18 345
-----TTTGGTTATCTAGCTGTATG----- mirL 20 268
-----TTGGTTATCTAGCTGTATGA----- mirL 20 178
-----TTTGGTTATCTAGCTGTA----- mirL 18 139
-----TTTGGTTATCTAGCTGTATGAG----- mirL 22 74
-----TTGGTTATCTAGCTGTATG----- mirL 19 62

```

```
-----ATCTTTGGTTATCTAGCTGT----- mirL 20 49
-----ATCTTTGGTTATCTAGCTGTATGA----- mirL 24 47
-----ATCTTTGGTTATCTAGCTGTA----- mirL 21 45
-----ATCTTTGGTTATCTAGCTG----- mirL 19 31
-----TATCTTTGGTTATCTAGCTGTAT----- mirL 23 27
-----TTGGTTATCTAGCTGTATGAG----- mirL 21 9
-----TTATCTTTGGTTATCTAGCTGTATG----- mirL 25 5
-----TTATCTTTGGTTATCTAGCTGTAT----- mirL 24 5
-----TATCTTTGGTTATCTAGCTGT----- mirL 21 4
-----TATCTTTGGTTATCTAGCTG----- mirL 20 4
-----TTGGTTATCTAGCTGTATGAGTG----- mirL 23 3
-----TATCTTTGGTTATCTAGC----- mirL 18 2
-----TTATCTTTGGTTATCTAGC----- mirL 19 2
-----TTATCTTTGGTTATCTAGCTGTA----- mirL 23 1
-----TATCTTTGGTTATCTAGCT----- mirL 19 1
-----AGTGGTGTGGAGTCTTCATAA----- loop 21 1
-----TAAAGCTAGATAACCGAAAGTAA--- mirR 23 17576
-----ATAAAGCTAGATAACCGAAAGT----- mirR 22 9868
-----TAAAGCTAGATAACCGAAAGTA--- mirR 22 8719
-----TAAAGCTAGATAACCGAAAGT----- mirR 21 3165
-----TAAAGCTAGATAACCGAAAG----- mirR 20 2885
-----TAAAGCTAGATAACCGAAA----- mirR 19 2244
-----ATAAAGCTAGATAACCGAAAG----- mirR 21 2225
-----AAAGCTAGATAACCGAAAGTAA--- mirR 22 1818
-----ATAAAGCTAGATAACCGAAAGTA--- mirR 23 1791
-----ATAAAGCTAGATAACCGAAA----- mirR 20 1601
-----ATAAAGCTAGATAACCGAA----- mirR 19 1210
-----ATAAAGCTAGATAACCGAAAGTAA--- mirR 24 778
-----AAAGCTAGATAACCGAAAGTA--- mirR 21 720
-----TAAAGCTAGATAACCGAA----- mirR 18 708
-----TAAAGCTAGATAACCGAAAGTAAA-- mirR 24 593
-----ATAAAGCTAGATAACCGAAAGTAAA-- mirR 25 522
-----AAAGCTAGATAACCGAAAGT----- mirR 20 410
-----AAAGCTAGATAACCGAAAG----- mirR 19 257
-----AAAGCTAGATAACCGAAA----- mirR 18 129
-----AAAGCTAGATAACCGAAAGTAAA-- mirR 23 107
-----AAGCTAGATAACCGAAAGT----- mirR 19 20
-----AAGCTAGATAACCGAAAGTAA--- mirR 21 14
-----AAGCTAGATAACCGAAAGTA--- mirR 20 12
-----CATAAAGCTAGATAACCGA----- mirR 19 6
-----TCATAAAGCTAGATAACCGA----- mirR 20 4
-----AAAGCTAGATAACCGAAAGTAAAAA mirR 25 4
-----CATAAAGCTAGATAACCGAA----- mirR 20 4
-----AAGCTAGATAACCGAAAG----- mirR 18 4
-----AGCTAGATAACCGAAAGTAA--- mirR 20 3
-----CATAAAGCTAGATAACCGAAA----- mirR 21 3
```

```

-----CATAAAGCTAGATAACCGAAAGT----- mirR 23 3
-----CATAAAGCTAGATAAACCG----- mirR 18 2
-----AAGCTAGATAACCGAAAGTAAA-- mirR 22 2
-----AGCTAGATAACCGAAAGT----- mirR 18 2
-----AAGCTAGATAACCGAAAGTAAAA- mirR 23 1
-----AGCTAGATAACCGAAAGTA--- mirR 19 1
-----CATAAAGCTAGATAACCGAAAGTAA-- mirR 25 1

```

>mmu-mir-9-2

```

GTGAGGGAAGCGAGTTGTTATCTTTGGTTATCTAGCTGTATGAGTGTATTGGTCTTCATAAAGCTAGATAACCGAAAGTAAAAA species len reads
GTGAGGGAAGCGAGTTGTT----- morL 19 1
-----TCTTTGGTTATCTAGCTGTAT----- mirL 21 1486812
-----TCTTTGGTTATCTAGCTGTATGA----- mirL 23 253663
-----TCTTTGGTTATCTAGCTGTATG----- mirL 22 228204
-----TCTTTGGTTATCTAGCTGTA----- mirL 20 172509
-----CTTTGGTTATCTAGCTGTAT----- mirL 20 153540
-----TCTTTGGTTATCTAGCTGT----- mirL 19 88682
-----CTTTGGTTATCTAGCTGTATGA----- mirL 22 29291
-----CTTTGGTTATCTAGCTGTATG----- mirL 21 23447
-----CTTTGGTTATCTAGCTGTA----- mirL 19 20535
-----CTTTGGTTATCTAGCTGT----- mirL 18 10626
-----TTTGGTTATCTAGCTGTAT----- mirL 19 1311
-----TTTGGTTATCTAGCTGTATGA----- mirL 21 640
-----ATCTTTGGTTATCTAGCTGTAT----- mirL 22 513
-----TTGGTTATCTAGCTGTAT----- mirL 18 345
-----TTTGGTTATCTAGCTGTATG----- mirL 20 268
-----TTGGTTATCTAGCTGTATGA----- mirL 20 178
-----TTTGGTTATCTAGCTGTA----- mirL 18 139
-----TTTGGTTATCTAGCTGTATGAG----- mirL 22 74
-----TTGGTTATCTAGCTGTATG----- mirL 19 62
-----ATCTTTGGTTATCTAGCTGT----- mirL 20 49
-----ATCTTTGGTTATCTAGCTGTATGA----- mirL 24 47
-----ATCTTTGGTTATCTAGCTGTA----- mirL 21 45
-----ATCTTTGGTTATCTAGCTG----- mirL 19 31
-----TATCTTTGGTTATCTAGCTGTAT----- mirL 23 27
-----TTGGTTATCTAGCTGTATGAG----- mirL 21 9
-----TTATCTTTGGTTATCTAGCTGTAT----- mirL 24 5
-----TTATCTTTGGTTATCTAGCTGTATG----- mirL 25 5
-----TATCTTTGGTTATCTAGCTG----- mirL 20 4
-----TATCTTTGGTTATCTAGCTGT----- mirL 21 4
-----TTGGTTATCTAGCTGTATGAGTG----- mirL 23 3
-----TATCTTTGGTTATCTAGC----- mirL 18 2
-----TTATCTTTGGTTATCTAGC----- mirL 19 2
-----TATCTTTGGTTATCTAGCT----- mirL 19 1
-----TTATCTTTGGTTATCTAGCTGTA----- mirL 23 1
-----TATGAGTGTATTGGTCTTCAT----- loop 21 1

```



```

-----AGTGTATTGGTCTTCATA----- loop 18 1
-----TAAAGCTAGATAACCGAAAGTAA--- mirR 23 17576
-----ATAAAGCTAGATAACCGAAAGT----- mirR 22 9868
-----TAAAGCTAGATAACCGAAAGTA---- mirR 22 8719
-----TAAAGCTAGATAACCGAAAGT----- mirR 21 3165
-----TAAAGCTAGATAACCGAAAG----- mirR 20 2885
-----TAAAGCTAGATAACCGAAA----- mirR 19 2244
-----ATAAAGCTAGATAACCGAAAG----- mirR 21 2225
-----AAAGCTAGATAACCGAAAGTAA--- mirR 22 1818
-----ATAAAGCTAGATAACCGAAAGTA--- mirR 23 1791
-----ATAAAGCTAGATAACCGAAA----- mirR 20 1601
-----ATAAAGCTAGATAACCGAA----- mirR 19 1210
-----ATAAAGCTAGATAACCGAAAGTAA--- mirR 24 778
-----AAAGCTAGATAACCGAAAGTA--- mirR 21 720
-----TAAAGCTAGATAACCGAA----- mirR 18 708
-----TAAAGCTAGATAACCGAAAGTAAA-- mirR 24 593
-----ATAAAGCTAGATAACCGAAAGTAAA-- mirR 25 522
-----AAAGCTAGATAACCGAAAGT----- mirR 20 410
-----AAAGCTAGATAACCGAAAG----- mirR 19 257
-----AAAGCTAGATAACCGAAA----- mirR 18 129
-----AAAGCTAGATAACCGAAAGTAAA-- mirR 23 107
-----AAGCTAGATAACCGAAAGT----- mirR 19 20
-----AAGCTAGATAACCGAAAGTAA--- mirR 21 14
-----AAGCTAGATAACCGAAAGTA--- mirR 20 12
-----CATAAAGCTAGATAACCGA----- mirR 19 6
-----AAAGCTAGATAACCGAAAGTAAAAA mirR 25 4
-----TCATAAAGCTAGATAACCGA----- mirR 20 4
-----CATAAAGCTAGATAACCGAA----- mirR 20 4
-----AAGCTAGATAACCGAAAG----- mirR 18 4
-----AGCTAGATAACCGAAAGTAA--- mirR 20 3
-----CATAAAGCTAGATAACCGAAAGT----- mirR 23 3
-----CATAAAGCTAGATAACCGAAA----- mirR 21 3
-----AGCTAGATAACCGAAAGT----- mirR 18 2
-----AAGCTAGATAACCGAAAGTAAA-- mirR 22 2
-----CATAAAGCTAGATAACCG----- mirR 18 2
-----CATAAAGCTAGATAACCGAAAGTAA--- mirR 25 1
-----AGCTAGATAACCGAAAGTA--- mirR 19 1
-----AAGCTAGATAACCGAAAGTAAAA- mirR 23 1

```

>mmu-mir-9-3

```

GAATGGGAGGCCCGTTTCTCTCTTTGGTTATCTAGCTGTATGAGTGCCACAGAGCCGTCATAAAGCTAGATAACCGAAAGTAGAAATGACTCTCACAAC species len reads
GAATGGGAGGCCCGTTTCTCTCTTTGGTTATCTAGCTGTATGAGTGCCACAGAGCCGTCATAAAGCTAGATAACCGAAAGTAGAAATGACTCTCACAAC morL 18 1
-----TCTTTGGTTATCTAGCTGTAT----- mirL 21 1486812
-----TCTTTGGTTATCTAGCTGTATGA--- mirL 23 253662
-----TCTTTGGTTATCTAGCTGTATG--- mirL 22 228204
-----TCTTTGGTTATCTAGCTGTA----- mirL 20 172509

```

```
-----CTTTGGTTATCTAGCTGTAT----- mirL 20 153540
-----TCTTTGGTTATCTAGCTGT----- mirL 19 88682
-----CTTTGGTTATCTAGCTGTATGA----- mirL 22 29291
-----CTTTGGTTATCTAGCTGTATG----- mirL 21 23447
-----CTTTGGTTATCTAGCTGTA----- mirL 19 20535
-----CTTTGGTTATCTAGCTGT----- mirL 18 10626
-----TTTGGTTATCTAGCTGTAT----- mirL 19 1311
-----TTTGGTTATCTAGCTGTATGA----- mirL 21 640
-----TTGGTTATCTAGCTGTAT----- mirL 18 345
-----TTTGGTTATCTAGCTGTATG----- mirL 20 268
-----CTCTTTGGTTATCTAGCTGTAT----- mirL 22 186
-----TTGGTTATCTAGCTGTATGA----- mirL 20 178
-----TTTGGTTATCTAGCTGTA----- mirL 18 139
-----TTTGGTTATCTAGCTGTATGAG----- mirL 22 73
-----TTGGTTATCTAGCTGTATG----- mirL 19 62
-----CTCTTTGGTTATCTAGCTGTATGA----- mirL 24 15
-----CTCTTTGGTTATCTAGCTGTA----- mirL 21 13
-----TCTCTTTGGTTATCTAGCTGTAT----- mirL 23 9
-----TTGGTTATCTAGCTGTATGAG----- mirL 21 9
-----CTCTTTGGTTATCTAGCTGT----- mirL 20 8
-----CTCTTTGGTTATCTAGCTGTATGAG----- mirL 25 7
-----CTCTCTTTGGTTATCTAGCTGTAT----- mirL 24 3
-----TTGGTTATCTAGCTGTATGAGTG----- mirL 23 3
-----CTCTCTTTGGTTATCTAGCTGTATGA----- mirL 26 1
-----CTCTCTTTGGTTATCTAGCT----- mirL 20 1
-----TCTCTTTGGTTATCTAGCT----- mirL 19 1
-----TCTCTTTGGTTATCTAGC----- mirL 18 1
-----AGTGCCACAGAGCCGTCATAA----- loop 21 1
-----TAAAGCTAGATAACCGAAAGTAG----- mirR 23 12410
-----ATAAAGCTAGATAACCGAAAGT----- mirR 22 9868
-----TAAAGCTAGATAACCGAAAGTA----- mirR 22 8643
-----TAAAGCTAGATAACCGAAAGT----- mirR 21 3165
-----TAAAGCTAGATAACCGAAAG----- mirR 20 2886
-----TAAAGCTAGATAACCGAAA----- mirR 19 2266
-----ATAAAGCTAGATAACCGAAAG----- mirR 21 2225
-----ATAAAGCTAGATAACCGAAAGTA----- mirR 23 1791
-----ATAAAGCTAGATAACCGAAA----- mirR 20 1600
-----AAAGCTAGATAACCGAAAGTAG----- mirR 22 1328
-----ATAAAGCTAGATAACCGAA----- mirR 19 1207
-----AAAGCTAGATAACCGAAAGTA----- mirR 21 721
-----TAAAGCTAGATAACCGAA----- mirR 18 708
-----ATAAAGCTAGATAACCGAAAGTAG----- mirR 24 488
-----TAAAGCTAGATAACCGAAAGTAGA----- mirR 24 417
-----AAAGCTAGATAACCGAAAGT----- mirR 20 410
-----ATAAAGCTAGATAACCGA----- mirR 18 395
-----AAAGCTAGATAACCGAAAG----- mirR 19 257
```

```

-----AAAGCTAGATAACCGAAA----- mirR 18 129
-----AAAGCTAGATAACCGAAAGTAGA----- mirR 23 79
-----AAGCTAGATAACCGAAAGT----- mirR 19 20
-----AAGCTAGATAACCGAAAGTA----- mirR 20 12
-----CATAAAGCTAGATAAACCGA----- mirR 19 6
-----AAGCTAGATAACCGAAAGTAG----- mirR 21 5
-----TCATAAAGCTAGATAAACCGA----- mirR 20 4
-----AAAGCTAGATAACCGAAAGTAGAAA----- mirR 25 4
-----CATAAAGCTAGATAAACCGAA----- mirR 20 4
-----AAGCTAGATAACCGAAAG----- mirR 18 4
-----AAGCTAGATAACCGAAAGTAGA----- mirR 22 3
-----CATAAAGCTAGATAACCGAAA----- mirR 21 3
-----CATAAAGCTAGATAAACCGAAAGT----- mirR 23 3
-----CATAAAGCTAGATAAACCG----- mirR 18 2
-----AGCTAGATAACCGAAAGTAG----- mirR 20 2
-----AGCTAGATAACCGAAAGT----- mirR 18 2
-----AGCTAGATAACCGAAAGTA----- mirR 19 1
-----CATAAAGCTAGATAACCGAAAGTAG----- mirR 25 1
-----AGAAATGACTCTCACAAAC morR 18 1

```

>mmu-mir-29c

```

CTGACCGATTTCTCCTGGTGTTTCAGAGTCTGTTTTGTCTAGCACCATTGAAATCGGTTATGATGTAGGGGGAAGAGCACCA species len reads
-TGACCGATTTCTCCTGGTGTT----- mirL 22 6414
--GACCGATTTCTCCTGGTGTT----- mirL 21 2801
-TGACCGATTTCTCCTGGTGTT----- mirL 21 2757
--GACCGATTTCTCCTGGTGTT----- mirL 20 1851
--GACCGATTTCTCCTGGTGTTCA----- mirL 22 1450
-TGACCGATTTCTCCTGGTGTT----- mirL 20 805
-TGACCGATTTCTCCTGGTGTTCA----- mirL 23 657
---ACCGATTTCTCCTGGTGTTCA----- mirL 21 549
---ACCGATTTCTCCTGGTGTT----- mirL 20 423
-TGACCGATTTCTCCTGGTGTT----- mirL 19 407
--GACCGATTTCTCCTGGTGTT----- mirL 19 331
--GACCGATTTCTCCTGGTG----- mirL 18 172
---ACCGATTTCTCCTGGTGTTCAGA----- mirL 23 107
---ACCGATTTCTCCTGGTGTTCA----- mirL 22 90
---ACCGATTTCTCCTGGTGTT----- mirL 19 88
CTGACCGATTTCTCCTGGTGTT----- mirL 23 7
CTGACCGATTTCTCCTGGTGTT----- mirL 22 2
---CCGATTTCTCCTGGTGTT----- mirL 18 1
CTGACCGATTTCTCCTGG----- mirL 18 1
---CCGATTTCTCCTGGTGTT----- mirL 19 1
-----TCAGAGTCTGTTTTGTCT----- loop 19 1
-----TAGCACCATTGAAATCGGTTA----- mirR 22 1201396
-----TAGCACCATTGAAATCGGTT----- mirR 21 567475
-----AGCACCATTGAAATCGGTTA----- mirR 21 74947

```

```

-----AGCACCATTGAAATCGGTT----- mirR 20 41829
-----TAGCACCATTGAAATCGGTTAT----- mirR 23 29144
-----TAGCACCATTGAAATCGGT----- mirR 20 24565
-----TAGCACCATTGAAATCGG----- mirR 19 19326
-----TAGCACCATTGAAATCG----- mirR 18 15904
-----AGCACCATTGAAATCGGTTAT----- mirR 22 2942
-----CTAGCACCATTGAAATCGGTT----- mirR 22 2210
-----TAGCACCATTGAAATCGGTTATG----- mirR 24 1629
-----CTAGCACCATTGAAATCGGTTA----- mirR 23 1302
-----AGCACCATTGAAATCGGT----- mirR 19 1226
-----GCACCATTGAAATCGGTTA----- mirR 20 726
-----GCACCATTGAAATCGGTT----- mirR 19 403
-----GCACCATTGAAATCGGTTAT----- mirR 21 319
-----AGCACCATTGAAATCGG----- mirR 18 256
-----CTAGCACCATTGAAATCGGT----- mirR 21 190
-----GCACCATTGAAATCGGTTATG----- mirR 22 162
-----CTAGCACCATTGAAATCGG----- mirR 20 113
-----AGCACCATTGAAATCGGTTATG----- mirR 23 109
-----GCACCATTGAAATCGGT----- mirR 18 94
-----TCTAGCACCATTGAAATCGGTTA----- mirR 24 48
-----CTAGCACCATTGAAATCGGTTAT----- mirR 24 42
-----CACCATTGAAATCGGTTA----- mirR 19 42
-----CTAGCACCATTGAAATCG----- mirR 19 40
-----TCTAGCACCATTGAAATCGGTT----- mirR 23 34
-----GCACCATTGAAATCGGTTATGA----- mirR 23 33
-----TCTAGCACCATTGAAATCGGTTAT----- mirR 25 23
-----CACCATTGAAATCGGTT----- mirR 18 16
-----AGCACCATTGAAATCGGTTATGA----- mirR 24 13
-----CACCATTGAAATCGGTTATGA----- mirR 22 12
-----CACCATTGAAATCGGTTAT----- mirR 20 11
-----CACCATTGAAATCGGTTATG----- mirR 21 7
-----CTAGCACCATTGAAATCGGTTATG----- mirR 25 7
-----TCTAGCACCATTGAAATCGGT----- mirR 22 5
-----GTCTAGCACCATTGAAATCGGTT----- mirR 24 2
-----GTCTAGCACCATTGAAATCGGT----- mirR 23 1
-----TCTAGCACCATTGAAATCGG----- mirR 21 1
-----GCACCATTGAAATCGGTTATGAT----- mirR 24 1
-----CACCATTGAAATCGGTTATGAT----- mirR 23 1
-----TGTAGGGGAAGAGCACCA morR 19 1
-----ATGTAGGGGAAGAGCACCA morR 20 1
-----ATGTAGGGGAAGAGCAC-- morR 18 1

```

>mmu-mir-125b-2

```

CATCACACGAGACTTTGCCTAGTCCCTGAGACCCTAACTTGTGAGGTATTTAGTAACATCACAAGTCAGGTTCTTGGGACCTAGG species len reads
----ACACGAGACTTTGCCTAG----- morL 18 9
---CACACGAGACTTTGCCTAG----- morL 19 3

```

```

-ATCACACGAGACTTTGCCTAG----- morL 21 2
-ATCACACGAGACTTTGCCTA----- morL 20 2
----ACACGAGACTTTGCCTAGT----- morL 19 1
--TCACACGAGACTTTGCCTAG----- morL 20 1
CATCACACGAGACTTTGCCTAG----- morL 22 1
CATCACACGAGACTTTGCCT----- morL 20 1
-----TCCCTGAGACCCTAACTTGTGA----- mirL 22 955743
-----TCCCTGAGACCCTAACTTGTG----- mirL 21 324652
-----TCCCTGAGACCCTAACTTGT----- mirL 20 233449
-----TCCCTGAGACCCTAACTTGTGAG----- mirL 23 94715
-----CCCTGAGACCCTAACTTGTGA----- mirL 21 78474
-----TCCCTGAGACCCTAACTTG----- mirL 19 32841
-----CCCTGAGACCCTAACTTGTG----- mirL 20 23691
-----CCCTGAGACCCTAACTTGT----- mirL 19 11374
-----CCCTGAGACCCTAACTTGTGAG----- mirL 22 6542
-----CCCTGAGACCCTAACTTG----- mirL 18 1261
-----CCTGAGACCCTAACTTGTGA----- mirL 20 211
-----CTGAGACCCTAACTTGTGA----- mirL 19 107
-----CCTGAGACCCTAACTTGTG----- mirL 19 69
-----GTCCCTGAGACCCTAACTTGTGA----- mirL 23 65
-----GTCCCTGAGACCCTAACTTGTG----- mirL 22 61
-----CCTGAGACCCTAACTTGT----- mirL 18 38
-----GTCCCTGAGACCCTAACTTGT----- mirL 21 36
-----CTGAGACCCTAACTTGTG----- mirL 18 33
-----CCTGAGACCCTAACTTGTGAG----- mirL 21 14
-----CTGAGACCCTAACTTGTGAG----- mirL 20 13
-----GTCCCTGAGACCCTAACTTGTGAG----- mirL 24 12
-----AGTCCCTGAGACCCTAACTTGT----- mirL 22 8
-----AGTCCCTGAGACCCTAACTTGTGAG----- mirL 25 6
-----GTCCCTGAGACCCTAACTTG----- mirL 20 4
-----AGTCCCTGAGACCCTAACTTGTGA----- mirL 24 4
-----CTGAGACCCTAACTTGTGAGG----- mirL 21 4
-----AGTCCCTGAGACCCTAACTTGTG----- mirL 23 3
-----CCTGAGACCCTAACTTGTGAGG----- mirL 22 3
-----CTGAGACCCTAACTTGTGAGGT----- mirL 22 2
-----AGTCCCTGAGACCCTAACTTG----- mirL 21 1
-----ACAAGTCAGGTTCTTGGGACC----- mirR 21 1828
-----ACAAGTCAGGTTCTTGGGACCT----- mirR 22 797
-----ACAAGTCAGGTTCTTGGGAC----- mirR 20 743
-----ACAAGTCAGGTTCTTGGGACCTA----- mirR 23 347
-----ACAAGTCAGGTTCTTGGGA----- mirR 19 237
-----ACAAGTCAGGTTCTTGGGACCTAG----- mirR 24 195
-----TCACAAGTCAGGTTCTTGGGACC----- mirR 23 185
-----ATCACAAGTCAGGTTCTTGG----- mirR 20 128
-----ATCACAAGTCAGGTTCTTGGG----- mirR 21 104
-----TCACAAGTCAGGTTCTTGGGAC----- mirR 22 102

```

```

-----ATCACAAAGTCAGGTTCTTGGGAC----- mirR 23 88
-----ACAAGTCAGGTTCTTGGG----- mirR 18 81
-----ATCACAAAGTCAGGTTCTTGGGACC----- mirR 24 78
-----TCACAAGTCAGGTTCTTGGGA----- mirR 21 59
-----TCACAAGTCAGGTTCTTGGG----- mirR 20 52
-----ATCACAAAGTCAGGTTCTTGGGA----- mirR 22 42
-----ATCACAAAGTCAGGTTCTT----- mirR 18 34
-----ATCACAAAGTCAGGTTCTTG----- mirR 19 29
-----TCACAAGTCAGGTTCTTGG----- mirR 19 28
-----CAAGTCAGGTTCTTGGGACC----- mirR 20 21
-----TCACAAGTCAGGTTCTTG----- mirR 18 15
-----TCACAAGTCAGGTTCTTGGGACCT--- mirR 24 12
-----CACAAAGTCAGGTTCTTGGGACC--- mirR 22 11
-----CAAGTCAGGTTCTTGGGACCTAG- mirR 23 7
-----CACAAAGTCAGGTTCTTGGGA----- mirR 20 5
-----CAAGTCAGGTTCTTGGGAC----- mirR 19 5
-----CAAGTCAGGTTCTTGGGACCTA-- mirR 22 5
-----CACAAAGTCAGGTTCTTGGGACCT--- mirR 23 2
-----CACAAAGTCAGGTTCTTGGG----- mirR 19 2
-----CAAGTCAGGTTCTTGGGACCTAGG mirR 24 2
-----CACAAAGTCAGGTTCTTGG----- mirR 18 2
-----CAAGTCAGGTTCTTGGGA----- mirR 18 2
-----AGTCAGGTTCTTGGGACC----- mirR 18 1
-----AAGTCAGGTTCTTGGGACCTAG- mirR 22 1
-----CAAGTCAGGTTCTTGGGACCT--- mirR 21 1
-----CACAAAGTCAGGTTCTTGGGAC----- mirR 21 1

```

>mmu-mir-125b-1

| GAATCGTGTGCGCTCCCCTCAGTCCCTGAGACCCTAACTTGTGATGTTTACCGTTTAAATCCACGGGTTAGGCTCTTGGGAGCTGCGGGTCGTGCCCTTGCATCG | species | len | reads  |
|-----------------------------------------------------------------------------------------------------------|---------|-----|--------|
| ---TCGTGTGCGCTCCCCTCAG-----                                                                               | morL    | 20  | 7      |
| ----GTGTGCGCTCCCCTCAG-----                                                                                | morL    | 18  | 4      |
| -AATCGTGTGCGCTCCCCTCAG-----                                                                               | morL    | 22  | 2      |
| ---TCGTGTGCGCTCCCCTCAGT-----                                                                              | morL    | 21  | 2      |
| ----CGTGTGCGCTCCCCTCAG-----                                                                               | morL    | 19  | 1      |
| GAATCGTGTGCGCTCCCCTCA-----                                                                                | morL    | 22  | 1      |
| GAATCGTGTGCGCTCCCCTCAGT-----                                                                              | morL    | 24  | 1      |
| ----GTTGCGCTCCCCTCAGTC-----                                                                               | morL    | 18  | 1      |
| ----CGTGTGCGCTCCCCTCA-----                                                                                | morL    | 18  | 1      |
| -----TCCCTGAGACCCTAACTTGTGA-----                                                                          | mirL    | 22  | 956130 |
| -----TCCCTGAGACCCTAACTTGTG-----                                                                           | mirL    | 21  | 324648 |
| -----TCCCTGAGACCCTAACTTGT-----                                                                            | mirL    | 20  | 233424 |
| -----TCCCTGAGACCCTAACTTGTGAT-----                                                                         | mirL    | 23  | 96194  |
| -----CCCTGAGACCCTAACTTGTGA-----                                                                           | mirL    | 21  | 78507  |
| -----TCCCTGAGACCCTAACTTG-----                                                                             | mirL    | 19  | 32863  |
| -----CCCTGAGACCCTAACTTGTG-----                                                                            | mirL    | 20  | 23684  |
| -----CCCTGAGACCCTAACTTGT-----                                                                             | mirL    | 19  | 11368  |

```
-----CCCTGAGACCCTAACTTGTGAT----- mirL 22 6799
-----CCCTGAGACCCTAACTTG----- mirL 18 1261
-----CCTGAGACCCTAACTTGTGA----- mirL 20 211
-----CTGAGACCCTAACTTGTGA----- mirL 19 107
-----CCTGAGACCCTAACTTGTG----- mirL 19 69
-----GTCCTGAGACCCTAACTTGTGA----- mirL 23 65
-----GTCCTGAGACCCTAACTTGTG----- mirL 22 61
-----CCTGAGACCCTAACTTGT----- mirL 18 38
-----GTCCTGAGACCCTAACTTGT----- mirL 21 36
-----CTGAGACCCTAACTTGTG----- mirL 18 33
-----CCTGAGACCCTAACTTGTGAT----- mirL 21 15
-----GTCCTGAGACCCTAACTTGTGAT----- mirL 24 13
-----CTGAGACCCTAACTTGTGAT----- mirL 20 9
-----AGTCCCTGAGACCCTAACTTGT----- mirL 22 8
-----AGTCCCTGAGACCCTAACTTGTGAT----- mirL 25 7
-----GTCCTGAGACCCTAACTTG----- mirL 20 4
-----AGTCCCTGAGACCCTAACTTGTGA----- mirL 24 4
-----AGTCCCTGAGACCCTAACTTGTG----- mirL 23 3
-----CTGAGACCCTAACTTGTGATGT----- mirL 22 2
-----CCTGAGACCCTAACTTGTGATG----- mirL 22 2
-----AGTCCCTGAGACCCTAACTTG----- mirL 21 1
-----CTGAGACCCTAACTTGTGATG----- mirL 21 1
-----ATGTTTACCGTTTAAATCCAC----- loop 21 1
-----ACGGGTTAGGCTCTTGGGAGC----- mirR 21 248
-----ACGGGTTAGGCTCTTGGGAG----- mirR 20 167
-----ACGGGTTAGGCTCTTGGGAGCT----- mirR 22 107
-----ACGGGTTAGGCTCTTGGGA----- mirR 19 66
-----ACGGGTTAGGCTCTTGGGAGCTGC----- mirR 24 29
-----ACGGGTTAGGCTCTTGGG----- mirR 18 24
-----CACGGGTTAGGCTCTTGGGAGC----- mirR 22 19
-----ACGGGTTAGGCTCTTGGGAGCTG----- mirR 23 19
-----CACGGGTTAGGCTCTTGGGA----- mirR 20 12
-----CACGGGTTAGGCTCTTGGGAG----- mirR 21 11
-----CACGGGTTAGGCTCTTGGG----- mirR 19 6
-----CACGGGTTAGGCTCTTGG----- mirR 18 3
-----TCCACGGGTTAGGCTCTTGGG----- mirR 21 2
-----TCCACGGGTTAGGCTCTTGGGAGC----- mirR 24 2
-----TCCACGGGTTAGGCTCTTG----- mirR 19 2
-----TCCACGGGTTAGGCTCTTGG----- mirR 20 2
-----CACGGGTTAGGCTCTTGGGAGCT----- mirR 23 2
-----GGGTTAGGCTCTTGGGAGC----- mirR 19 1
-----CACGGGTTAGGCTCTTGGGAGCTGC----- mirR 25 1
-----TCCACGGGTTAGGCTCTT----- mirR 18 1
-----TCCACGGGTTAGGCTCTTGGGA----- mirR 22 1
-----GGTTAGGCTCTTGGGAGC----- mirR 18 1
-----GCGGGTCGTGCCTTTGCATCG morR 21 1
```

```
-----GCTGCGGGTCGTGCCTTTGC----- morR 20 1
-----CTGCGGGTCGTGCCTTTG----- morR 18 1

>mmu-mir-138-1
TCTAGCATGGTGTGTGGGACAGCTGGTGTGTGAATCAGGCCGTTGCCAATCAGAGAACGGCTACTTCACAACACCAGGGCCACACTGCAAGCAGCGAG species len reads
---AGCATGGTGTGTGGGAC----- morL 18 1
--TAGCATGGTGTGTGGGAC----- morL 19 1
TCTAGCATGGTGTGTGGGAC----- morL 18 1
---GCATGGTGTGTGGGACAG----- morL 19 1
-----AGCTGGTGTGTGAATCAGGCC----- mirL 22 711496
-----AGCTGGTGTGTGAATCAGGCC----- mirL 21 366919
-----AGCTGGTGTGTGAATCAGGCCG----- mirL 23 220993
-----AGCTGGTGTGTGAATCAGGCCGTT----- mirL 25 111940
-----AGCTGGTGTGTGAATCAGGCCGT----- mirL 24 109894
-----GCTGGTGTGTGAATCAGGCC----- mirL 21 433
-----CAGCTGGTGTGTGAATCAGGCC----- mirL 22 301
-----GCTGGTGTGTGAATCAGGCCG----- mirL 22 210
-----GCTGGTGTGTGAATCAGGCC----- mirL 20 210
-----GCTGGTGTGTGAATCAGGCCGTT----- mirL 23 160
-----CAGCTGGTGTGTGAATCAGGCC----- mirL 23 116
-----CAGCTGGTGTGTGAATCAGGCCG----- mirL 24 78
-----GCTGGTGTGTGAATCAGG----- mirL 19 36
-----ACAGCTGGTGTGTGAATCAGGCC----- mirL 23 31
-----TGGTGTGTGTGAATCAGGCCG----- mirL 20 30
-----CTGGTGTGTGAATCAGGCC----- mirL 19 22
-----CAGCTGGTGTGTGAATCAGGCCGTT----- mirL 25 20
-----TGGTGTGTGTGAATCAGGCC----- mirL 19 17
-----TGGTGTGTGTGAATCAGGCC----- mirL 18 16
-----CTGGTGTGTGAATCAGGCC----- mirL 20 14
-----TGGTGTGTGTGAATCAGGCCGTT----- mirL 21 12
-----TGGTGTGTGTGAATCAGGCCGTTG----- mirL 23 12
-----CAGCTGGTGTGTGAATCA----- mirL 19 12
-----CTGGTGTGTGAATCAGGCCGTT----- mirL 22 11
-----CTGGTGTGTGAATCAGGCCG----- mirL 21 8
-----GACAGCTGGTGTGTGAATCAGGCC----- mirL 25 7
-----ACAGCTGGTGTGTGAATCAGGCC----- mirL 24 7
-----ACAGCTGGTGTGTGAATCAGGCCG----- mirL 25 5
-----ACAGCTGGTGTGTGAATCAG----- mirL 21 4
-----CTGGTGTGTGAATCAGGCCGTTG----- mirL 24 3
-----ACAGCTGGTGTGTGAATCA----- mirL 20 2
-----GACAGCTGGTGTGTGAATCAGGCCGTTG----- mirL 29 1
-----GACAGCTGGTGTGTGAATCA----- mirL 21 1
-----GACAGCTGGTGTGTGAATCAGGCC----- mirL 24 1
-----TTGCCAATCAGAGAACGGCT----- loop 20 1
-----CCGTTGCCAATCAGAGAA----- loop 18 1
-----GCTACTTCACAACACCAGGGCC----- mirR 22 2315
```



```

-----GCTACTTCACAACACCAGGGC----- mirR 21 1289
-----GCTACTTCACAACACCAGGG----- mirR 20 503
-----GCTACTTCACAACACCAGG----- mirR 19 406
-----GCTACTTCACAACACCAG----- mirR 18 213
-----GCTACTTCACAACACCAGGGCCA----- mirR 23 176
-----GCTACTTCACAACACCAGGGCCAC----- mirR 24 101
-----CGGCTACTTCACAACACCAGGGC----- mirR 23 71
-----CGGCTACTTCACAACACCAGGGCC----- mirR 24 32
-----CGGCTACTTCACAACACCAGG----- mirR 21 30
-----CTACTTCACAACACCAGGGCC----- mirR 21 28
-----CGGCTACTTCACAACACCAG----- mirR 20 27
-----CGGCTACTTCACAACACCA----- mirR 19 18
-----CGGCTACTTCACAACACCAGGG----- mirR 22 16
-----CGGCTACTTCACAACACC----- mirR 18 14
-----CTACTTCACAACACCAGGGC----- mirR 20 12
-----CTACTTCACAACACCAGGGCCA----- mirR 22 10
-----CTACTTCACAACACCAGGG----- mirR 19 8
-----CTACTTCACAACACCAGG----- mirR 18 6
-----GGCTACTTCACAACACCAGGGCC----- mirR 23 3
-----TACTTCACAACACCAGGGCC----- mirR 20 3
-----TACTTCACAACACCAGGGCCA----- mirR 21 3
-----CTACTTCACAACACCAGGGCCAC----- mirR 23 3
-----GGCTACTTCACAACACCAGGGC----- mirR 22 3
-----GGCTACTTCACAACACCAGG----- mirR 20 2
-----ACTTCACAACACCAGGGC----- mirR 18 2
-----GGCTACTTCACAACACCA----- mirR 18 2
-----TACTTCACAACACCAGGGCCAC----- mirR 22 2
-----TACTTCACAACACCAGGGC----- mirR 19 2
-----CTACTTCACAACACCAGGGCCACA----- mirR 24 1
-----GGCTACTTCACAACACCAG----- mirR 19 1
-----TACTTCACAACACCAGGG----- mirR 18 1
-----ACTTCACAACACCAGGGCC----- mirR 19 1
-----CACTGCACTGCAAGCAGCGAG morR 21 1

```

>mmu-mir-138-2

```

CATTTCTGGTATGGTTGCTGCAGCTGGTGTGTGAATCAGGCCGACGAGCAGCGCATCCTCTTACCCGGCTATTTTCACGACACCAGGGTTGCACCTACCCATCCTCTCCAGGCAAG species len reads
-ATTTCTGGTATGGTTGCTGC----- morL 20 3
--TTTCTGGTATGGTTGCTGC----- morL 19 1
CATTTCTGGTATGGTTGCTGC----- morL 21 1
-ATTTCTGGTATGGTTGCTG----- morL 19 1
-----AGCTGGTGTGTGAATCAGGCC----- mirL 22 711494
-----AGCTGGTGTGTGAATCAGGC----- mirL 21 366278
-----AGCTGGTGTGTGAATCAGGCCG----- mirL 23 220972
-----AGCTGGTGTGTGAATCAGGCCGAC----- mirL 25 118538
-----AGCTGGTGTGTGAATCAGGCCGA----- mirL 24 74208
-----GCTGGTGTGTGAATCAGGCC----- mirL 21 433

```

```

-----CAGCTGGTGGTGTGAATCAGGC----- mirL 22 301
-----GCTGGTGGTGTGAATCAGGC----- mirL 20 210
-----GCTGGTGGTGTGAATCAGGCCG----- mirL 22 210
-----CAGCTGGTGGTGTGAATCAGGCC----- mirL 23 116
-----GCTGGTGGTGTGAATCAGGCCGAC----- mirL 24 100
-----GCTGGTGGTGTGAATCAGGCCGA----- mirL 23 88
-----CAGCTGGTGGTGTGAATCAGGCCG----- mirL 24 78
-----TGGTGGTGTGAATCAGGCCG----- mirL 20 30
-----GCAGCTGGTGGTGTGAATCAGGC----- mirL 23 30
-----CTGGTGGTGTGAATCAGGC----- mirL 19 22
-----CAGCTGGTGGTGTGAATCAGGCCGA----- mirL 25 18
-----TGGTGGTGTGAATCAGGCC----- mirL 19 17
-----TGGTGGTGTGAATCAGGC----- mirL 18 16
-----CAGCTGGTGGTGTGAATCAGGCCGAC----- mirL 26 15
-----CTGGTGGTGTGAATCAGGCC----- mirL 20 14
-----CTGGTGGTGTGAATCAGGCCGAC----- mirL 23 12
-----TGGTGGTGTGAATCAGGCCGAC----- mirL 22 12
-----TGGTGGTGTGAATCAGGCCGA----- mirL 21 8
-----CTGGTGGTGTGAATCAGGCCG----- mirL 21 8
-----CTGGTGGTGTGAATCAGGCCGA----- mirL 22 7
-----GCAGCTGGTGGTGTGAATCAGGCC----- mirL 24 5
-----GCAGCTGGTGGTGTGAATCAGGCCG----- mirL 25 4
-----GCAGCTGGTGGTGTGAATCAG----- mirL 21 3
-----GCAGCTGGTGGTGTGAATCAGGCCGA----- mirL 26 3
-----TGCAGCTGGTGGTGTGAATCAGGCCGAC----- mirL 28 1
-----TGCAGCTGGTGGTGTGAATCAGGCC----- mirL 25 1
-----TGCAGCTGGTGGTGTGAATCA----- mirL 21 1
-----ACGAGCAGCGCATCCTCTTACCC----- loop 23 163
-----ACGAGCAGCGCATCCTCTTACC----- loop 22 128
-----ACGAGCAGCGCATCCTCTTAC----- loop 21 53
-----ACGAGCAGCGCATCCTCTTACCCG----- loop 24 30
-----ACGAGCAGCGCATCCTCTTACCCGG----- loop 25 19
-----ACGAGCAGCGCATCCTCTTACCCGGC----- loop 26 6
-----ACGAGCAGCGCATCCTCTTACCCGGCT----- loop 27 1
-----GAGCAGCGCATCCTCTTACCCG----- loop 22 1
-----GCTATTTACGACACCAGGGTT----- mirR 22 1204
-----GCTATTTACGACACCAGGGTTG----- mirR 23 1203
-----GCTATTTACGACACCAGGGT----- mirR 21 546
-----GCTATTTACGACACCAGGG----- mirR 20 427
-----GCTATTTACGACACCAGG----- mirR 19 358
-----GCTATTTACGACACCAGGGTTGC----- mirR 24 259
-----GCTATTTACGACACCAG----- mirR 18 174
-----CTATTTACGACACCAGGGTTG----- mirR 22 29
-----CTATTTACGACACCAGGGTT----- mirR 21 18
-----CTATTTACGACACCAGGGTTGC----- mirR 23 15
-----TATTTACGACACCAGGGTTG----- mirR 21 7

```

```

-----TATTTACGACACCAGGGT----- mirR 20 5
-----CTATTTACGACACCAGGG----- mirR 19 4
-----ATTTACGACACCAGGGT----- mirR 19 3
-----CTATTTACGACACCAGG----- mirR 18 3
-----GGCTATTTACGACACCAGGG----- mirR 22 3
-----CTATTTACGACACCAGGGT----- mirR 20 3
-----TATTTACGACACCAGGGTTGC----- mirR 22 2
-----TATTTACGACACCAGGG----- mirR 18 1
-----GGCTATTTACGACACCAGGG----- mirR 21 1
-----GGCTATTTACGACACCAGG----- mirR 20 1
-----ATTTACGACACCAGGGTTG----- mirR 20 1
-----CGGCTATTTACGACACCAGG----- mirR 21 1
-----GGCTATTTACGACACCAGGGT----- mirR 23 1
-----CGGCTATTTACGACACCA----- mirR 19 1
-----ATTTACGACACCAGGGT----- mirR 18 1
-----GCACCCTACCCATCCTCTCCAGGC--- morR 24 1
-----TGCACCCTACCCATCCTCTCCAGGCAAG morR 28 1

```

>mmu-mir-29b-1

```

CAAAGCTTCTTCAGGAAGCTGGTTTCATATGGTGGTTTAGATTAAATAGTGATGTCTAGCACCATTTGAAATCAGTGTTCTTGGTGGAGAACTACTTCGC species len reads
CAAAGCTTCTTCAGGAAG----- morL 18 1
-----GCTGGTTTCATATGGTGGTTA----- mirL 22 883
-----GCTGGTTTCATATGGTGGTTT----- mirL 21 448
-----GCTGGTTTCATATGGTGGTTAG----- mirL 23 290
-----GCTGGTTTCATATGGTGGTT----- mirL 20 163
-----GCTGGTTTCATATGGTGGTTTAGAT----- mirL 25 96
-----CTGGTTTCATATGGTGGTTTAGA----- mirL 23 14
-----CTGGTTTCATATGGTGGTTTAG----- mirL 22 6
-----TGGTTTCATATGGTGGTTTAG----- mirL 21 3
-----CTGGTTTCATATGGTGGTT----- mirL 19 3
-----GGTTTCATATGGTGGTTT----- mirL 18 2
-----TGGTTTCATATGGTGGTTTAGA----- mirL 22 2
-----GGTTTCATATGGTGGTTA----- mirL 19 1
-----AGCTGGTTTCATATGGTGGTTT----- mirL 22 1
-----CTGGTTTCATATGGTGGTTA----- mirL 21 1
-----TAGCACCATTTGAAATCAGTGT----- mirR 22 316906
-----TAGCACCATTTGAAATCAGTGTT----- mirR 24 137072
-----TAGCACCATTTGAAATCAGTGTT----- mirR 23 104197
-----TAGCACCATTTGAAATCAGTG----- mirR 21 101204
-----TAGCACCATTTGAAATCAGT----- mirR 20 89314
-----TAGCACCATTTGAAATCAG----- mirR 19 87950
-----TAGCACCATTTGAAATCA----- mirR 18 76842
-----AGCACCATTTGAAATCAGTGT----- mirR 21 13609
-----CTAGCACCATTTGAAATCAGTGT----- mirR 23 9719
-----AGCACCATTTGAAATCAGTGTT----- mirR 23 9438
-----AGCACCATTTGAAATCAGTGT----- mirR 22 4598

```

```

-----AGCACCATTTGAAATCAGT----- mirR 19 3313
-----AGCACCATTTGAAATCAGTG----- mirR 20 2892
-----CTAGCACCATTTGAAATCAGT----- mirR 21 1532
-----CTAGCACCATTTGAAATCAGTG----- mirR 22 1378
-----AGCACCATTTGAAATCAG----- mirR 18 1371
-----CTAGCACCATTTGAAATCAGTGTT----- mirR 24 1013
-----CTAGCACCATTTGAAATCAG----- mirR 20 1005
-----CTAGCACCATTTGAAATCAGTGTTTC----- mirR 25 524
-----AGCACCATTTGAAATCAGTGTTCT----- mirR 24 364
-----CTAGCACCATTTGAAATCA----- mirR 19 149
-----GCACCATTTGAAATCAGTGT----- mirR 20 134
-----GCACCATTTGAAATCAGTGTT----- mirR 21 90
-----GCACCATTTGAAATCAGTGTTTC----- mirR 22 77
-----GCACCATTTGAAATCAGTG----- mirR 19 26
-----TCTAGCACCATTTGAAATCAGTGT----- mirR 24 10
-----TCTAGCACCATTTGAAATCAGT----- mirR 22 9
-----CACCATTTGAAATCAGTGT----- mirR 19 9
-----GCACCATTTGAAATCAGT----- mirR 18 9
-----TCTAGCACCATTTGAAATCAGTGTT----- mirR 25 9
-----TCTAGCACCATTTGAAATCAGTG----- mirR 23 7
-----TCTAGCACCATTTGAAATCAG----- mirR 21 7
-----CACCATTTGAAATCAGTGTT----- mirR 20 6
-----CACCATTTGAAATCAGTGTTTC----- mirR 21 5
-----GCACCATTTGAAATCAGTGTTCT----- mirR 23 4
-----TCTAGCACCATTTGAAATCA----- mirR 20 1
-----CACCATTTGAAATCAGTG----- mirR 18 1
-----GCACCATTTGAAATCAGTGTTCTT----- mirR 24 1
-----TTGGTGGAGAACTACTTCG----- morR 19 1
-----TGGTGGAGAACTACTTCGC----- morR 19 1

>mmu-mir-29b-2
CAGTGAGATCCTCTTCTTCTGGAAGCTGGTTTCACATGGTGGCTTAGATTTTTCCATCTTTGTATCTAGCACCATTTGAAATCAGTGTTT TAGGAGTAAGAATTGCAGCACA species len reads
CAGTGAGATCCTCTTCTTCTGGAAG----- morL 25 1
--GTGAGATCCTCTTCTTCTGG----- morL 20 1
----AGATCCTCTTCTTCTGGAAGC----- morL 21 1
----AGATCCTCTTCTTCTGGAA----- morL 19 1
-----CTGGTTTCACATGGTGGCTTAG----- mirL 22 1569
-----GCTGGTTTCACATGGTGGCTTA----- mirL 22 599
-----CTGGTTTCACATGGTGGC----- mirL 18 406
-----GCTGGTTTCACATGGTGGC----- mirL 19 385
-----CTGGTTTCACATGGTGGCTTAGA----- mirL 23 375
-----GCTGGTTTCACATGGTGGCTTAG----- mirL 23 354
-----CTGGTTTCACATGGTGGCTTA----- mirL 21 207
-----CTGGTTTCACATGGTGGCTTAGAT----- mirL 24 163
-----TGGTTTCACATGGTGGCTTAG----- mirL 21 120
-----GCTGGTTTCACATGGTGGCTTAGAT----- mirL 25 73

```

```

-----GCTGGTTTCACATGGTGGCT----- mirL 20 63
-----TGGTTTCACATGGTGGCTTAGAT----- mirL 23 54
-----TGGTTTCACATGGTGGCTTAGA----- mirL 22 53
-----TGGTTTCACATGGTGGCTTA----- mirL 20 23
-----GGTTTCACATGGTGGCTTAG----- mirL 20 11
-----TGGTTTCACATGGTGGCTT----- mirL 19 11
-----GGTTTCACATGGTGGCTTAGAT----- mirL 22 4
-----GGTTTCACATGGTGGCTTA----- mirL 19 3
-----GGTTTCACATGGTGGCTTAGA----- mirL 21 3
-----AGCTGGTTTCACATGGTGGC----- mirL 20 2
-----GGTTTCACATGGTGGCTTAGATTT----- mirL 24 1
-----AGCTGGTTTCACATGGTGG----- mirL 18 1
-----AGCTGGTTTCACATGGTGGCTTA----- mirL 23 1
-----TAGCACCATTTGAAATCAGTGT----- mirR 22 318220
-----TAGCACCATTTGAAATCAGTGT----- mirR 23 104209
-----TAGCACCATTTGAAATCAGTG----- mirR 21 101204
-----TAGCACCATTTGAAATCAG----- mirR 19 91046
-----TAGCACCATTTGAAATCAGT----- mirR 20 89365
-----TAGCACCATTTGAAATCA----- mirR 18 76842
-----TAGCACCATTTGAAATCAGTGT----- mirR 24 28483
-----AGCACCATTTGAAATCAGTGT----- mirR 21 13609
-----CTAGCACCATTTGAAATCAGTGT----- mirR 23 9719
-----AGCACCATTTGAAATCAGTGT----- mirR 22 5032
-----AGCACCATTTGAAATCAGT----- mirR 19 3434
-----AGCACCATTTGAAATCAGTG----- mirR 20 2905
-----CTAGCACCATTTGAAATCAGT----- mirR 21 1532
-----AGCACCATTTGAAATCAGTGT----- mirR 23 1412
-----CTAGCACCATTTGAAATCAGTG----- mirR 22 1378
-----AGCACCATTTGAAATCAG----- mirR 18 1371
-----CTAGCACCATTTGAAATCAGTGT----- mirR 24 1013
-----CTAGCACCATTTGAAATCAG----- mirR 20 1005
-----AGCACCATTTGAAATCAGTGT----- mirR 24 376
-----CTAGCACCATTTGAAATCA----- mirR 19 149
-----GCACCATTTGAAATCAGTGT----- mirR 20 135
-----GCACCATTTGAAATCAGTGT----- mirR 21 93
-----GCACCATTTGAAATCAGTGT----- mirR 22 47
-----CTAGCACCATTTGAAATCAGTGT----- mirR 25 28
-----GCACCATTTGAAATCAGTG----- mirR 19 26
-----TCTAGCACCATTTGAAATCAGTGT----- mirR 24 10
-----TCTAGCACCATTTGAAATCAGTGT----- mirR 25 9
-----GCACCATTTGAAATCAGT----- mirR 18 9
-----TCTAGCACCATTTGAAATCAGT----- mirR 22 9
-----CACCATTTGAAATCAGTGT----- mirR 19 9
-----GCACCATTTGAAATCAGTGT----- mirR 23 8
-----TCTAGCACCATTTGAAATCAGTG----- mirR 23 7
-----TCTAGCACCATTTGAAATCAG----- mirR 21 7

```

```

-----CACCATTTGAAATCAGTGT----- mirR 20 6
-----CACCATTTGAAATCAGTGT----- mirR 21 4
-----GCACCATTTGAAATCAGTGT----- mirR 24 1
-----TCTAGCACCATTTGAAATCA----- mirR 20 1
-----CACCATTTGAAATCAGTGT----- mirR 22 1
-----ATCTAGCACCATTTGAAATCAGTGT----- mirR 25 1
-----CACCATTTGAAATCAGT----- mirR 18 1
-----TTTAGGAGTAAGAATTGCAGCACA morR 24 1
-----TTTAGGAGTAAGAATTGCAGCA-- morR 21 1

```

>mmu-mir-125a

```

AGCTACACTGCCGGCCTCTGGGTCCCTGAGACCCTTTAACCTGTGAGGACGTCCAGGGTCACAGGTGAGGTCTTGGGAGCCTG species len reads
---ACACTGCCGGCCTCTGGG----- morL 18 1
AGCTACACTGCCGGCCTCT----- morL 19 1
---ACTGCCGGCCTCTGGGTC----- morL 18 1
-----TCCCTGAGACCCTTTAACCTGT----- mirL 22 357911
-----TCCCTGAGACCCTTTAACCTGTGA----- mirL 24 111552
-----TCCCTGAGACCCTTTAACCTGTGAG----- mirL 25 101025
-----TCCCTGAGACCCTTTAACCT----- mirL 19 57968
-----TCCCTGAGACCCTTTAACCTGTG----- mirL 23 46279
-----CCCTGAGACCCTTTAACCTGT----- mirL 21 13438
-----CCCTGAGACCCTTTAACCTGTGA----- mirL 23 10448
-----CCCTGAGACCCTTTAACCTGTG----- mirL 22 2505
-----CCCTGAGACCCTTTAACCT----- mirL 18 1303
-----CCCTGAGACCCTTTAACCT----- mirL 19 998
-----CCTGAGACCCTTTAACCTGT----- mirL 20 66
-----GTCCCTGAGACCCTTTAACCTGTGA----- mirL 25 64
-----GTCCCTGAGACCCTTTAACCTGT----- mirL 23 60
-----CCTGAGACCCTTTAACCTGTGA----- mirL 22 55
-----CTGAGACCCTTTAACCTGT----- mirL 19 51
-----CTGAGACCCTTTAACCTGTGA----- mirL 21 34
-----GTCCCTGAGACCCTTTAACCT----- mirL 20 17
-----CCTGAGACCCTTTAACCTGTG----- mirL 21 12
-----CTGAGACCCTTTAACCTGTG----- mirL 20 11
-----GTCCCTGAGACCCTTTAACCTGTG----- mirL 24 7
-----GTCCCTGAGACCCTTTAACCT----- mirL 21 6
-----GGTCCCTGAGACCCTTTAACCTGTGA----- mirL 26 3
-----CCTGAGACCCTTTAACCTGTGAG----- mirL 23 3
-----CCTGAGACCCTTTAACCT----- mirL 18 2
-----CTGAGACCCTTTAACCTGTGAG----- mirL 22 2
-----GGTCCCTGAGACCCTTTAACCTGT----- mirL 24 2
-----GGGTCCCTGAGACCCTTT----- mirL 18 1
-----GGTCCCTGAGACCCTTTAACCT----- mirL 21 1
-----GGGTCCCTGAGACCCTTTAACCT----- mirL 22 1
-----CTGAGACCCTTTAACCTGTGAGG----- mirL 23 1
-----ACAGGTGAGGTCTTGGGAGC----- mirR 21 496

```

```

-----ACAGGTGAGGTTCTTGGGAG---- mirR 20 265
-----ACAGGTGAGGTTCTTGGGAGCC-- mirR 22 255
-----ACAGGTGAGGTTCTTGGGA---- mirR 19 86
-----ACAGGTGAGGTTCTTGGG----- mirR 18 48
-----ACAGGTGAGGTTCTTGGGAGCCT- mirR 23 22
-----CAGGTGAGGTTCTTGGGAGC--- mirR 20 16
-----ACAGGTGAGGTTCTTGGGAGCCTG mirR 24 12
-----CAGGTGAGGTTCTTGGGAG---- mirR 19 7
-----CAGGTGAGGTTCTTGGGAGCC-- mirR 21 4
-----CAGGTGAGGTTCTTGGGAGCCT- mirR 22 3
-----AGGTGAGGTTCTTGGGAGCC-- mirR 20 1
-----CACAGGTGAGGTTCTTGGGAGCC-- mirR 23 1

```

>mmu-mir-30c-2

```

GAGAGCACTGAGTGACAGATATTGTA AACATCCTACACTCTCAGCTGTGAAAAGTAAGAAAGCTGGGAGAAGGCTGTTTACTCTCT species len reads
GAGAGCACTGAGTGACAGATATT----- morL 23 2
-AGAGCACTGAGTGACAGA----- morL 18 1
-AGAGCACTGAGTGACAGATAT----- morL 21 1
-----TGTA AACATCCTACACTCTC----- mirL 20 312050
-----TGTA AACATCCTACACTCTCAGCT----- mirL 24 147991
-----TGTA AACATCCTACACTCTCAGC----- mirL 23 138080
-----GTA AACATCCTACACTCTCAGC----- mirL 22 28396
-----TGTA AACATCCTACACTCTCA----- mirL 21 22689
-----TGTA AACATCCTACACTCT----- mirL 19 15688
-----GTA AACATCCTACACTCTCAGCT----- mirL 23 12497
-----GTA AACATCCTACACTCTC----- mirL 19 6433
-----GTA AACATCCTACACTCTCA----- mirL 20 2690
-----GTA AACATCCTACACTCT----- mirL 18 2319
-----TTGTA AACATCCTACACTCTCAGC----- mirL 24 131
-----AAACATCCTACACTCTCAGCT----- mirL 21 65
-----TAAACATCCTACACTCTCAGCT----- mirL 22 57
-----TTGTA AACATCCTACACTCTCAGCT----- mirL 25 53
-----TTGTA AACATCCTACACTCTC----- mirL 21 48
-----ATTGTA AACATCCTACACTCTC----- mirL 22 29
-----AAACATCCTACACTCTCAGC----- mirL 20 28
-----TAAACATCCTACACTCTCAGC----- mirL 21 27
-----TTGTA AACATCCTACACTC----- mirL 19 24
-----TATTGTA AACATCCTACACTCTC----- mirL 23 17
-----ATTGTA AACATCCTACACTCTCAGCT----- mirL 26 17
-----TAAACATCCTACACTCTC----- mirL 18 16
-----TTGTA AACATCCTACACTCT----- mirL 20 15
-----AAACATCCTACACTCTCA----- mirL 18 13
-----ATTGTA AACATCCTACACTC----- mirL 20 12
-----ATTGTA AACATCCTACACTCTCAGC----- mirL 25 7
-----TAAACATCCTACACTCTCA----- mirL 19 6
-----AAACATCCTACACTCTCAG----- mirL 19 6

```

```

-----TATTGTAAACATCCTACACT----- mirL 21 5
-----TATTGTAAACATCCTACACT----- mirL 20 4
-----AAACATCCTACACTCTCAGCT----- mirL 22 3
-----ATTGTAAACATCCTACACT----- mirL 19 2
-----TAAACATCCTACACTCTCAG----- mirL 20 2
-----TATTGTAAACATCCTACACTCTCAGC----- mirL 26 1
-----TATTGTAAACATCCTACACTCTCA----- mirL 24 1
-----GCTGTGAAAAGTAAGAAAG----- loop 19 1
-----CTGGGAGAAGGCTGTTTACTCTC----- mirR 23 116
-----CTGGGAGAAGGCTGTTTACTCT----- mirR 22 50
-----CTGGGAGAAGGCTGTTTACTC----- mirR 21 39
-----TGGGAGAAGGCTGTTTACTCT----- mirR 21 18
-----CTGGGAGAAGGCTGTTTACT----- mirR 19 15
-----CTGGGAGAAGGCTGTTTACT----- mirR 20 8
-----TGGGAGAAGGCTGTTTACTCTC----- mirR 22 7
-----CTGGGAGAAGGCTGTTTACTCTCT----- mirR 24 4
-----CTGGGAGAAGGCTGTTTACT----- mirR 18 4
-----GGGAGAAGGCTGTTTACTCTC----- mirR 21 3
-----TGGGAGAAGGCTGTTTACTC----- mirR 20 2
-----GGGAGAAGGCTGTTTACTCT----- mirR 20 1
-----AAGCTGGGAGAAGGCTGTTTACTC----- mirR 24 1
-----AGCTGGGAGAAGGCTGTTTACTCT----- mirR 24 1

```

>mmu-mir-30c-1

```

TAACCATGTTGTAGTGTGTAAACATCCTACACTCTCAGCTGTGAGCTCAAGGTGGCTGGGAGAGGGTTGTTTACTCCTCTGCCATGGAAAACGTCAG species len reads
TAACCATGTTGTAGTGTG----- morL 18 1
-----TGTAACATCCTACACTCTC----- mirL 20 312050
-----TGTAACATCCTACACTCTCAGCT----- mirL 24 147991
-----TGTAACATCCTACACTCTCAGC----- mirL 23 138081
-----GTAACATCCTACACTCTCAGC----- mirL 22 28396
-----TGTAACATCCTACACTCTCA----- mirL 21 22689
-----TGTAACATCCTACACTCT----- mirL 19 15688
-----GTAACATCCTACACTCTCAGCT----- mirL 23 12497
-----GTAACATCCTACACTCTC----- mirL 19 6433
-----GTAACATCCTACACTCTCA----- mirL 20 2690
-----GTAACATCCTACACTCT----- mirL 18 2319
-----AAACATCCTACACTCTCAGCT----- mirL 21 65
-----TAAACATCCTACACTCTCAGCT----- mirL 22 57
-----GTGTAAACATCCTACACTCTCAGC----- mirL 24 33
-----AAACATCCTACACTCTCAGC----- mirL 20 28
-----TAAACATCCTACACTCTCAGC----- mirL 21 27
-----GTGTAAACATCCTACACTCTC----- mirL 21 22
-----GTGTAAACATCCTACACTCTCAGCT----- mirL 25 21
-----TAAACATCCTACACTCTC----- mirL 18 16
-----AAACATCCTACACTCTCA----- mirL 18 13
-----GTGTAAACATCCTACACTC----- mirL 19 8

```



```

-----AAACATCCTACACTCTCAG----- mirL 19 6
-----TAAACATCCTACACTCTCA----- mirL 19 6
-----TGTGTAAACATCCTACACTCTC----- mirL 22 6
-----GTGTAAACATCCTACACTCT----- mirL 20 4
-----AAACATCCTACACTCTCAGCTG----- mirL 22 3
-----TGTGTAAACATCCTACACTCTCAGCT----- mirL 26 2
-----TAAACATCCTACACTCTCAG----- mirL 20 2
-----GTGTGTAAACATCCTACACTCTCAGCT----- mirL 27 1
-----TGTGTAAACATCCTACACTC----- mirL 20 1
-----CAGCTGTGAGCTCAAGT----- loop 18 1
-----CTGGGAGAGGGTTGTTTACTCC----- mirR 22 29
-----CTGGGAGAGGGTTGTTTACTC----- mirR 21 12
-----CTGGGAGAGGGTTGTTTACT----- mirR 19 8
-----CTGGGAGAGGGTTGTTTACT----- mirR 20 7
-----TGGGAGAGGGTTGTTTACTCC----- mirR 21 5
-----TGGGAGAGGGTTGTTTACTCCT----- mirR 22 3
-----CTGGGAGAGGGTTGTTTACTCCT----- mirR 23 3
-----CTGGGAGAGGGTTGTTTA----- mirR 18 3
-----GGAGAGGGTTGTTTACTCCT----- mirR 20 2
-----GGGAGAGGGTTGTTTACTCCT----- mirR 21 2
-----GGCTGGGAGAGGGTTGTT----- mirR 18 2
-----GGGAGAGGGTTGTTTACTCC----- mirR 20 2
-----GGGAGAGGGTTGTTTACTC----- mirR 19 1
-----TGGGAGAGGGTTGTTTACTC----- mirR 20 1
-----TGGGAGAGGGTTGTTTACTCCT----- mirR 23 1
-----CTGGGAGAGGGTTGTTTACTCCTTC----- mirR 25 1
-----GCTGGGAGAGGGTTGTTT----- mirR 18 1
-----TTCTGCCATGGAAAACGTCAG morR 21 1

```

>mmu-mir-26a-2

```

GTGGAGGCTGCGGCTGGATTCAAGTAATCCAGGATAGGCTGTGTCCGTCATGAGGCCTGTTCTTGATTACTTGTTCCT species len reads
GTGGAGGCTGCGGCTGGA morL 18 1
-----TTCAAGTAATCCAGGATAGGCT----- mirL 22 307557
-----TTCAAGTAATCCAGGATAGGC----- mirL 21 128745
-----TTCAAGTAATCCAGGATAG----- mirL 19 105043
-----TTCAAGTAATCCAGGATAGGCTG----- mirL 23 59830
-----TTCAAGTAATCCAGGATAGG----- mirL 20 32791
-----TCAAGTAATCCAGGATAGGCT----- mirL 21 27048
-----TCAAGTAATCCAGGATAGGC----- mirL 20 8412
-----TCAAGTAATCCAGGATAGGCTG----- mirL 22 7833
-----TCAAGTAATCCAGGATAG----- mirL 18 5615
-----TCAAGTAATCCAGGATAGG----- mirL 19 2791
-----CAAGTAATCCAGGATAGGCT----- mirL 20 122
-----AAGTAATCCAGGATAGGCT----- mirL 19 83
-----ATTCAAGTAATCCAGGATAGGC----- mirL 22 63
-----CAAGTAATCCAGGATAGGC----- mirL 19 55

```

```

-----AAGTAATCCAGGATAGGCTG----- mirL 20 40
-----CAAGTAATCCAGGATAGGCTG----- mirL 21 38
-----ATTCAAGTAATCCAGGATAGGCT----- mirL 23 19
-----AAGTAATCCAGGATAGGC----- mirL 18 17
-----ATTCAAGTAATCCAGGATAG----- mirL 20 14
-----CAAGTAATCCAGGATAGG----- mirL 18 12
-----CAAGTAATCCAGGATAGGCTGT----- mirL 22 10
-----ATTCAAGTAATCCAGGATA----- mirL 19 8
-----AAGTAATCCAGGATAGGCTGT----- mirL 21 7
-----GGATTCAAGTAATCCAGGATAGGC----- mirL 24 3
-----ATTCAAGTAATCCAGGATAGG----- mirL 21 2
-----AAGTAATCCAGGATAGGCTGTG----- mirL 22 1
-----GATTCAAGTAATCCAGGATAGGC----- mirL 23 1
-----GGATTCAAGTAATCCAGGATAG----- mirL 22 1
-----CCTGTTCTTGATTACTTGTTTC----- mirR 22 151
-----CCTGTTCTTGATTACTTGTTT----- mirR 21 41
-----CCTGTTCTTGATTACTTGTT----- mirR 20 40
-----CCTGTTCTTGATTACTTGT----- mirR 19 10
-----CCTGTTCTTGATTACTTGTTTCT----- mirR 23 9
-----CCTGTTCTTGATTACTTG----- mirR 18 4
-----AGGCCTGTTCTTGATTACTTGTT----- mirR 23 2
-----AGGCCTGTTCTTGATTACTTGTTTC----- mirR 25 1
-----AGGCCTGTTCTTGATTACTTGT----- mirR 22 1
-----GTTCTTGATTACTTGTTTC----- mirR 19 1

```

>mmu-mir-26a-1

```

TCGTTCAAGTAATCCAGGATAGGCTGTGCAGGTCCCAAGGGGCTATTCTTGGTTACTTGACGGGGACGCGGGCCTGGACGCCGGCAT species len reads
---TTCAAGTAATCCAGGATAGGCT----- mirL 22 307557
---TTCAAGTAATCCAGGATAGGC----- mirL 21 128745
---TTCAAGTAATCCAGGATAG----- mirL 19 105043
---TTCAAGTAATCCAGGATAGGCTG----- mirL 23 59821
---TTCAAGTAATCCAGGATAGG----- mirL 20 32791
---TCAAGTAATCCAGGATAGGCT----- mirL 21 27048
---TCAAGTAATCCAGGATAGGC----- mirL 20 8409
---TCAAGTAATCCAGGATAGGCTG----- mirL 22 7832
---TCAAGTAATCCAGGATAG----- mirL 18 5615
---TCAAGTAATCCAGGATAGG----- mirL 19 2787
---CAAGTAATCCAGGATAGGCT----- mirL 20 122
---AAGTAATCCAGGATAGGCT----- mirL 19 83
---CAAGTAATCCAGGATAGGC----- mirL 19 55
---AAGTAATCCAGGATAGGCTG----- mirL 20 40
---CAAGTAATCCAGGATAGGCTG----- mirL 21 38
---GTTCAAGTAATCCAGGATAGGC----- mirL 22 36
---AAGTAATCCAGGATAGGC----- mirL 18 17
---GTTCAAGTAATCCAGGATAGGCT----- mirL 23 12
---CAAGTAATCCAGGATAGG----- mirL 18 12

```

```

-----CAAGTAATCCAGGATAGGCTGT----- mirL 22 10
--GTTCAAGTAATCCAGGATAG----- mirL 20 9
-----AAGTAATCCAGGATAGGCTGT----- mirL 21 7
TCGTTCAAGTAATCCAGGATAGGC----- mirL 24 7
--CGTTCAAGTAATCCAGGATAGGC----- mirL 23 3
--GTTCAAGTAATCCAGGATAGGCTG----- mirL 24 3
--CGTTCAAGTAATCCAGGATAGGCT----- mirL 24 2
--GTTCAAGTAATCCAGGAT----- mirL 18 2
--CGTTCAAGTAATCCAGGATAG----- mirL 21 1
TCGTTCAAGTAATCCAGGATAGG----- mirL 23 1
-----AAGTAATCCAGGATAGGCTGTG----- mirL 22 1
TCGTTCAAGTAATCCAGGATAGGCT----- mirL 25 1
TCGTTCAAGTAATCCAGGATAG----- mirL 22 1
TCGTTCAAGTAATCCAGGA----- mirL 19 1
-----CCTATTCTTGGTTACTTGAC----- mirR 21 38
-----CCTATTCTTGGTTACTTGACG----- mirR 22 13
-----CCTATTCTTGGTTACTTGACGG----- mirR 23 6
-----CCTATTCTTGGTTACTTGCA----- mirR 20 4
-----CCTATTCTTGGTTACTTGCG----- mirR 19 4
-----TATTCTTGGTTACTTGACGGG----- mirR 22 1
-----CTATTCTTGGTTACTTGACGG----- mirR 22 1
-----ATTCTTGGTTACTTGACG----- mirR 19 1
-----CCTATTCTTGGTTACTTGACGGGGAC----- mirR 27 1
-----CTATTCTTGGTTACTTGACGGGG----- mirR 24 1
-----CTATTCTTGGTTACTTGCG----- mirR 18 1
-----GGGCCTATTCTTGGTTACTTGCG----- mirR 22 1
-----GGGACGCGGGCCTGGACGCCGGCAT morR 25 1

```

>mmu-mir-99a

```

ACGATGCCCATTTGACATAAAACCCGTAGATCCGATCCTTGTGGTGAAGTGGACCGCGCAAGCTCGTTTCTATGGGTCTGTGGCAGTGTGGTGATCTGAC species len reads
ACGATGCCCATTTGACATAAA----- morL 20 1
-----AACCCGTAGATCCGATCCTTGT----- mirL 22 299332
-----AACCCGTAGATCCGATCCTTGT----- mirL 21 205518
-----AACCCGTAGATCCGATCCTTGTGG----- mirL 23 125406
-----AACCCGTAGATCCGATCCTTGT----- mirL 20 23672
-----AACCCGTAGATCCGATCCTT----- mirL 19 18603
-----AAACCCGTAGATCCGATCCTTGT----- mirL 22 662
-----ACCCGTAGATCCGATCCTTGTG----- mirL 21 442
-----ACCCGTAGATCCGATCCTTGT----- mirL 20 264
-----AAACCCGTAGATCCGATCCTTGTG----- mirL 23 261
-----ACCCGTAGATCCGATCCTTGTGG----- mirL 22 153
-----CCCGTAGATCCGATCCTTGTG----- mirL 20 80
-----AAACCCGTAGATCCGATC----- mirL 18 53
-----AAACCCGTAGATCCGATCCTTGT----- mirL 21 52
-----CCCGTAGATCCGATCCTTGT----- mirL 19 45
-----CCGTAGATCCGATCCTTGTG----- mirL 19 35

```

```

-----ACCCGTAGATCCGATCTTG----- mirL 19 21
-----AAACCCGTAGATCCGATCT----- mirL 19 20
-----CCGTAGATCCGATCTTGT----- mirL 18 17
-----ACCCGTAGATCCGATCTTGTGGT----- mirL 23 16
-----CCCGTAGATCCGATCTTGTGG----- mirL 21 14
-----CCGTAGATCCGATCTTGTGG----- mirL 20 5
-----CCCGTAGATCCGATCTTGTGGT----- mirL 22 5
-----CCCGTAGATCCGATCTTG----- mirL 18 4
-----TAAACCCGTAGATCCGATCTTGT----- mirL 23 4
-----CCGTAGATCCGATCTTGTGGT----- mirL 21 2
-----ATAAACCCGTAGATCCGATCTTGTG----- mirL 25 2
-----CCGTAGATCCGATCTTGTGGT----- mirL 22 1
-----ATAAACCCGTAGATCCGATCTTG----- mirL 23 1
-----CAAGCTCGTTTCTATGGGTCTGT----- mirR 23 3482
-----CAAGCTCGTTTCTATGGGTC----- mirR 20 1577
-----CAAGCTCGTTTCTATGGGTCT----- mirR 21 1271
-----CAAGCTCGTTTCTATGGGTCTG----- mirR 22 841
-----CAAGCTCGTTTCTATGGGTCTGTG----- mirR 24 419
-----AAGCTCGTTTCTATGGGTCTGT----- mirR 22 304
-----CAAGCTCGTTTCTATGGGTCTGTGG----- mirR 25 277
-----CAAGCTCGTTTCTATGGGT----- mirR 19 158
-----AAGCTCGTTTCTATGGGTC----- mirR 19 87
-----AAGCTCGTTTCTATGGGTCTG----- mirR 21 71
-----AAGCTCGTTTCTATGGGTCT----- mirR 20 66
-----AAGCTCGTTTCTATGGGTCTGTG----- mirR 23 65
-----AAGCTCGTTTCTATGGGTCTGTGG----- mirR 24 24
-----AAGCTCGTTTCTATGGGTCTGTGGC----- mirR 25 15
-----GCAAGCTCGTTTCTATGGGTCT----- mirR 22 5
-----AGCTCGTTTCTATGGGTCTGTG----- mirR 22 3
-----GCAAGCTCGTTTCTATGGGTCTGT----- mirR 24 2
-----GCAAGCTCGTTTCTATGGGT----- mirR 20 2
-----AGCTCGTTTCTATGGGTCTGT----- mirR 21 2
-----GCTCGTTTCTATGGGTCTGT----- mirR 20 1
-----GCAAGCTCGTTTCTATGGGTC----- mirR 21 1
-----GCGCAAGCTCGTTTCTATGGGTC----- mirR 23 1
-----GCAAGCTCGTTTCTATGGGTCTG----- mirR 23 1
-----GCAGTGTGGTGATCTGAC morR 18 1

>mmu-let-7b
CAGAACACGGACACCGCAGGGTGAGGTAGTAGGTTGTGTGGTTTCAGGGCAGTGATGTTGCCCTCCGAAGATAACTATACAACCTACTGCCTTCCCTGAGGCGCCCAGGGACACAG species len reads
CAGAACACGGACACCGCAGGG----- morL 21 1
-----ACGGACACCGCAGGGTGA----- morL 18 1
-----ACACGGACACCGCAGGGTGA----- morL 20 1
CAGAACACGGACACCGCAGG----- morL 20 1
-AGAACACGGACACCGCAGGG----- morL 20 1
-----TGAGGTAGTAGGTTGTGTGGTT----- mirL 22 230721

```

```

-----TGAGGTAGTAGGTTGTGTGG----- mirL 20 135787
-----TGAGGTAGTAGGTTGTGTGGTTTC----- mirL 24 80601
-----TGAGGTAGTAGGTTGTGTGGT----- mirL 21 63306
-----TGAGGTAGTAGGTTGTGTGGTTT----- mirL 23 41210
-----GAGGTAGTAGGTTGTGTGGTT----- mirL 21 8970
-----GAGGTAGTAGGTTGTGTGG----- mirL 19 4951
-----GAGGTAGTAGGTTGTGTGGTTTC----- mirL 23 4063
-----GAGGTAGTAGGTTGTGTGGT----- mirL 20 1688
-----GAGGTAGTAGGTTGTGTGGTTT----- mirL 22 1521
-----GGTAGTAGGTTGTGTGGTT----- mirL 19 63
-----GTGAGGTAGTAGGTTGTGTGGTT----- mirL 23 52
-----AGGTAGTAGGTTGTGTGGTT----- mirL 20 28
-----GTGAGGTAGTAGGTTGTGTGGTTTC----- mirL 25 20
-----GTGAGGTAGTAGGTTGTGTGGT----- mirL 22 17
-----GTGAGGTAGTAGGTTGTGTGGTTT----- mirL 24 16
-----GTGAGGTAGTAGGTTGTGTGG----- mirL 21 13
-----AGGTAGTAGGTTGTGTGG----- mirL 18 11
-----GGTAGTAGGTTGTGTGGTTT----- mirL 20 11
-----AGGTAGTAGGTTGTGTGGTTT----- mirL 21 8
-----AGGTAGTAGGTTGTGTGGT----- mirL 19 5
-----AGGTAGTAGGTTGTGTGGTTTC----- mirL 22 5
-----GGTAGTAGGTTGTGTGGT----- mirL 18 4
-----GGTAGTAGGTTGTGTGGTTTC----- mirL 21 4
-----GGTGAGGTAGTAGGTTGTGTGG----- mirL 22 2
-----GGTGAGGTAGTAGGTTGTGT----- mirL 20 2
-----GGTGAGGTAGTAGGTTGTGTGGT----- mirL 23 1
-----GGTGAGGTAGTAGGTTGTGTGGTTT----- mirL 25 1
-----GGTAGTAGGTTGTGTGGTTTCA----- mirL 22 1
-----GGGTGAGGTAGTAGGTTGTGTGGT----- mirL 24 1
-----CAGGGCAGTGATGTTGCCCTCCGAAGA----- loop 28 2
-----CAGGGCAGTGATGTTGCCCTCCGAAGATA----- loop 30 1
-----TCAGGGCAGTGATGTTGCCCTCCGAAGATAAC----- loop 33 1
-----TCAGGGCAGTGATGTTGCCCTCCGAAGAT----- loop 30 1
-----CTATACAACCTACTGCCTTCCC----- mirR 22 4726
-----CTATACAACCTACTGCCTTCC----- mirR 21 995
-----CTATACAACCTACTGCCTTC----- mirR 20 470
-----CTATACAACCTACTGCCTT----- mirR 19 115
-----CTATACAACCTACTGCCTTCCCT----- mirR 23 102
-----CTATACAACCTACTGCCT----- mirR 18 55
-----TATACAACCTACTGCCTTCCC----- mirR 21 29
-----CTATACAACCTACTGCCTTCCCTG----- mirR 24 18
-----ATACAACCTACTGCCTTCCC----- mirR 20 12
-----TATACAACCTACTGCCTTC----- mirR 19 8
-----TATACAACCTACTGCCTTCC----- mirR 20 7
-----AACTATACAACCTACTGCCTTC----- mirR 22 7
-----AACTATACAACCTACTGCCTTCC----- mirR 23 7

```

```

-----ATACAACCTACTGCCTTC----- mirR 18 4
-----ATACAACCTACTGCCTTCC----- mirR 19 3
-----TAACTATACAACCTACTGCC----- mirR 20 2
-----AACTATACAACCTACTGCCTTCCC----- mirR 24 2
-----ACTATACAACCTACTGCCTTCC----- mirR 22 2
-----TACAACCTACTGCCTTCCC----- mirR 19 2
-----ATACAACCTACTGCCTTCCCT----- mirR 21 1
-----TACAACCTACTGCCTTCC----- mirR 18 1
-----TAACTATACAACCTACTGCCTTCCC----- mirR 25 1
-----AACTATACAACCTACTGC----- mirR 18 1
-----AACTATACAACCTACTGCC----- mirR 19 1
-----TAACTATACAACCTACTGCCTTCC----- mirR 24 1
-----ACTATACAACCTACTGCCTTCCC----- mirR 23 1
-----TATACAACCTACTGCCTTCCCT----- mirR 22 1
-----CTGAGGCGCCAGGGACAC-- morR 19 1
-----TGAGGCGCCAGGGACACAG morR 20 1

```

>mmu-mir-132

```

CCGCCCCCGCGTCTCCAGGGCAACCGTGGCTTTCGATTGTTACTGTGGGAACCGGAGGTAACAGTCTACAGCCATGGTCGCCCCGAGCAGCCCACGCTCCCCACCACTCC species len reads
-----CGCGTCTCCAGGGCAACC----- morL 18 1
CCGCCCCCGCGTCTCCAGGG----- morL 20 1
-----ACCGTGGCTTTCGATTGTTACT----- mirL 22 35806
-----ACCGTGGCTTTCGATTGTTAC----- mirL 21 11420
-----AACCGTGGCTTTCGATTGTTA----- mirL 21 4536
-----AACCGTGGCTTTCGATTGTTAC----- mirL 22 3472
-----AACCGTGGCTTTCGATTGTT----- mirL 20 2448
-----ACCGTGGCTTTCGATTGTTA----- mirL 20 2040
-----ACCGTGGCTTTCGATTGTT----- mirL 19 1373
-----AACCGTGGCTTTCGATTGT----- mirL 19 1181
-----ACCGTGGCTTTCGATTGTTACTG----- mirL 23 1116
-----AACCGTGGCTTTCGATTG----- mirL 18 664
-----CCGTGGCTTTCGATTGTTACT----- mirL 21 19
-----CAACCGTGGCTTTCGATTGTTAC----- mirL 23 11
-----CAACCGTGGCTTTCGATTGTT----- mirL 21 9
-----GTGGCTTTCGATTGTTACT----- mirL 19 8
-----CAACCGTGGCTTTCGATTGTTA----- mirL 22 7
-----CAACCGTGGCTTTCGATTGT----- mirL 20 6
-----CCGTGGCTTTCGATTGTTAC----- mirL 20 5
-----GTGGCTTTCGATTGTTAC----- mirL 18 5
-----CGTGGCTTTCGATTGTTACT----- mirL 20 4
-----CGTGGCTTTCGATTGTTA----- mirL 18 2
-----CAACCGTGGCTTTCGATTG----- mirL 19 2
-----CGTGGCTTTCGATTGTTAC----- mirL 19 1
-----CCGTGGCTTTCGATTGTTACTG----- mirL 22 1
-----TAACAGTCTACAGCCATGGTC----- mirR 21 121733
-----TAACAGTCTACAGCCATGGTCG----- mirR 22 107815

```

```

-----TAAACAGTCTACAGCCATGGTCGC----- mirR 23 94640
-----TAACAGTCTACAGCCATGGT----- mirR 20 46828
-----AACAGTCTACAGCCATGGTCG----- mirR 21 16949
-----TAACAGTCTACAGCCATGG----- mirR 19 13845
-----TAACAGTCTACAGCCATG----- mirR 18 9564
-----AACAGTCTACAGCCATGGTCGC----- mirR 22 9511
-----AACAGTCTACAGCCATGGTC----- mirR 20 6821
-----AACAGTCTACAGCCATGGT----- mirR 19 5172
-----TAACAGTCTACAGCCATGGTCGCC----- mirR 24 4689
-----ACAGTCTACAGCCATGGTCGC----- mirR 21 1271
-----AACAGTCTACAGCCATGGTCGCC----- mirR 23 1176
-----AACAGTCTACAGCCATGG----- mirR 18 814
-----ACAGTCTACAGCCATGGTCGCC----- mirR 22 604
-----ACAGTCTACAGCCATGGT----- mirR 18 262
-----ACAGTCTACAGCCATGGTCG----- mirR 20 210
-----ACAGTCTACAGCCATGGTC----- mirR 19 206
-----ACAGTCTACAGCCATGGTCGCC----- mirR 23 126
-----AACAGTCTACAGCCATGGTCGCC----- mirR 24 91
-----GTAACAGTCTACAGCCATGGTC----- mirR 22 57
-----CAGTCTACAGCCATGGTCG----- mirR 19 27
-----ACAGTCTACAGCCATGGTCGCC----- mirR 24 27
-----GTAACAGTCTACAGCCATGGT----- mirR 21 24
-----CAGTCTACAGCCATGGTCGC----- mirR 20 14
-----GTAACAGTCTACAGCCATGGTCGC----- mirR 24 10
-----GTAACAGTCTACAGCCATGGTCG----- mirR 23 5
-----GTAACAGTCTACAGCCATGG----- mirR 20 3
-----GGTAAACAGTCTACAGCCATGGT----- mirR 22 3
-----GTAACAGTCTACAGCCAT----- mirR 18 2
-----AGGTAACAGTCTACAGCC----- mirR 18 2
-----GTAACAGTCTACAGCCATG----- mirR 19 2
-----CAGTCTACAGCCATGGTCGCC----- mirR 21 2
-----CAGTCTACAGCCATGGTC----- mirR 18 2
-----GGTAAACAGTCTACAGCCATGGTC----- mirR 23 1
-----AGGTAACAGTCTACAGCCATGGT----- mirR 23 1
-----AGGTAACAGTCTACAGCCA----- mirR 19 1
-----CCCCGCAGCAGCCCCACGCTCCCC----- morR 24 1
-----CGCCCCGCAGCAGCCCCAC----- morR 19 1
-----CCCCGCAGCAGCCCCACGCTCCCCACCACTCC morR 32 1
-----CGCCCCGCAGCAGCCCCA----- morR 18 1

```

>mmu-mir-434

```

ATCGCTCGACTCTGGGTTTGAACCAAAGCTCGACTCATGGTTTGAACCATTACTTAATTCGTGGTTTGAACCATCACTCGACTCCTGGT species len reads
-----TCGACTCTGGGTTTGAACC----- morL 19 1
ATCGCTCGACTCTGGGTTTGAACCAA----- morL 26 1
-----CTCTGGGTTTGAACCAAAG----- morL 19 1
---GCTCGACTCTGGGTTTGAACC----- morL 21 1

```

```

-----GACTCTGGGTTTGAACCAAA----- morL 20 1
----CTCGACTCTGGGTTTGAACC----- morL 20 1
-----CTCTGGGTTTGAACCAAAAGC----- morL 20 1
-----GCTCGACTCATGGTTTGAACCA----- mirL 22 4148
-----GCTCGACTCATGGTTTGAAC----- mirL 20 3479
-----GCTCGACTCATGGTTTGAACC----- mirL 21 2353
-----AGCTCGACTCATGGTTTGA----- mirL 19 2098
-----AGCTCGACTCATGGTTTGAAC----- mirL 21 1307
-----AGCTCGACTCATGGTTTGAACC----- mirL 22 1248
-----GCTCGACTCATGGTTTGA----- mirL 19 1167
-----AGCTCGACTCATGGTTTGA----- mirL 20 645
-----AGCTCGACTCATGGTTTGA----- mirL 18 562
-----GCTCGACTCATGGTTTGA----- mirL 18 523
-----CTCGACTCATGGTTTGAACCA----- mirL 21 5
-----CTCGACTCATGGTTTGAAC----- mirL 19 4
-----AAGCTCGACTCATGGTTTGAAC----- mirL 22 3
-----CTCGACTCATGGTTTGAACC----- mirL 20 3
-----CGACTCATGGTTTGAACCA----- mirL 19 2
-----AAGCTCGACTCATGGTTTGA----- mirL 21 1
-----CGACTCATGGTTTGAACC----- mirL 18 1
-----TCGACTCATGGTTTGAACCA----- mirL 20 1
-----AAGCTCGACTCATGGTTTGA----- mirL 20 1
-----TTTGAACCATCACTCGACTCCT--- mirR 22 247983
-----TTTGAACCATCACTCGACTCC--- mirR 21 119325
-----TTTGAACCATCACTCGACTC--- mirR 20 18892
-----TTGAACCATCACTCGACTCC--- mirR 20 18498
-----TTTGAACCATCACTCGACTC--- mirR 18 17177
-----TTGAACCATCACTCGACTCCT--- mirR 21 16824
-----TTTGAACCATCACTCGACTCCTG-- mirR 23 11896
-----TTTGAACCATCACTCGACTC--- mirR 19 5904
-----TTGAACCATCACTCGACTC--- mirR 19 2045
-----GTTTGAACCATCACTCGACTCC--- mirR 22 1901
-----TTGAACCATCACTCGACTCCTG-- mirR 22 1378
-----GTTTGAACCATCACTCGACTC--- mirR 21 956
-----TTTGAACCATCACTCGACTCCTGG- mirR 24 586
-----TTGAACCATCACTCGACTC--- mirR 18 540
-----GTTTGAACCATCACTCGACTCCT--- mirR 23 318
-----GTTTGAACCATCACTCGACTC--- mirR 20 232
-----TGAACCATCACTCGACTCCT--- mirR 20 207
-----GAACCATCACTCGACTCCT--- mirR 19 176
-----GTTTGAACCATCACTCGACTC--- mirR 19 143
-----TGAACCATCACTCGACTCC--- mirR 19 131
-----TTGAACCATCACTCGACTCCTGG- mirR 23 49
-----GAACCATCACTCGACTCC--- mirR 18 39
-----GTTTGAACCATCACTCGA--- mirR 18 23
-----TGAACCATCACTCGACTC--- mirR 18 20

```



```

-----GTTTGAACCATCACTCGACTCCTG-- mirR 24 15
-----GAACCATCACTCGACTCCTG-- mirR 20 10
-----TTGAACCATCACTCGACTCCTGGT mirR 24 9
-----TGAACCATCACTCGACTCCTG-- mirR 21 8
-----TGGTTTGAACCATCACTCGACTCC--- mirR 24 3
-----GGTTTGAACCATCACTCGACTCC--- mirR 23 2
-----TGGTTTGAACCATCACTC----- mirR 18 1
-----GGTTTGAACCATCACTCGACTCCT--- mirR 24 1
-----GGTTTGAACCATCACTCGACTC--- mirR 22 1
-----GAACCATCACTCGACTCCTGG- mirR 21 1
-----GAACCATCACTCGACTCCTGGT mirR 22 1
-----GGTTTGAACCATCACTCG----- mirR 18 1

```

>mmu-mir-126

| GCATCTTTGCCGGTGACAGCACATTATTACTTTTGGTACGCGCTGTGACACTTCAAACCTCGTACCGTGAGTAATAATGCGCGGT | species | len | reads |
|---------------------------------------------------------------------------------------|---------|-----|-------|
| ---TCTTTGCCGGTGACAGCA-----                                                            | morL    | 18  | 1     |
| GCATCTTTGCCGGTGACAGCAC-----                                                           | morL    | 22  | 1     |
| -----CATTATTACTTTTGGTACGCGC-----                                                      | mirL    | 22  | 98874 |
| -----CATTATTACTTTTGGTACGCG-----                                                       | mirL    | 21  | 69590 |
| -----CATTATTACTTTTGGTACGCG-----                                                       | mirL    | 20  | 50911 |
| -----CATTATTACTTTTGGTAC-----                                                          | mirL    | 18  | 26148 |
| -----CATTATTACTTTTGGTACG-----                                                         | mirL    | 19  | 23561 |
| -----ATTATTACTTTTGGTACGCGC-----                                                       | mirL    | 21  | 74    |
| -----ATTATTACTTTTGGTACGCGCT-----                                                      | mirL    | 22  | 69    |
| -----ATTATTACTTTTGGTACGCG-----                                                        | mirL    | 19  | 66    |
| -----ATTATTACTTTTGGTACGCG-----                                                        | mirL    | 20  | 53    |
| -----ACATTATTACTTTTGGTACGCG-----                                                      | mirL    | 21  | 38    |
| -----ATTATTACTTTTGGTACG-----                                                          | mirL    | 18  | 25    |
| -----TTATTACTTTTGGTACGCG-----                                                         | mirL    | 19  | 21    |
| -----ACATTATTACTTTTGGTAC-----                                                         | mirL    | 19  | 19    |
| -----ACATTATTACTTTTGGTACGCG-----                                                      | mirL    | 22  | 13    |
| -----TTATTACTTTTGGTACGCG-----                                                         | mirL    | 18  | 13    |
| -----ACATTATTACTTTTGGTACGCGC-----                                                     | mirL    | 23  | 13    |
| -----TTATTACTTTTGGTACGCGCT-----                                                       | mirL    | 21  | 12    |
| -----TATTACTTTTGGTACGCGC-----                                                         | mirL    | 19  | 10    |
| -----TTATTACTTTTGGTACGCGC-----                                                        | mirL    | 20  | 9     |
| -----TATTACTTTTGGTACGCG-----                                                          | mirL    | 18  | 8     |
| -----ACATTATTACTTTTGGTA-----                                                          | mirL    | 18  | 3     |
| -----TTATTACTTTTGGTACGCGCTGT-----                                                     | mirL    | 23  | 2     |
| -----GCACATTATTACTTTTGGTACGCG-----                                                    | mirL    | 23  | 2     |
| -----TATTACTTTTGGTACGCGCT-----                                                        | mirL    | 20  | 2     |
| -----TATTACTTTTGGTACGCGCTG-----                                                       | mirL    | 21  | 1     |
| -----CACATTATTACTTTTGGTACGCG-----                                                     | mirL    | 22  | 1     |
| -----CGTACCGTGAGTAATAATGCGC-----                                                      | mirR    | 22  | 65870 |
| -----TCGTACCGTGAGTAATAATGCGC-----                                                     | mirR    | 23  | 29612 |
| -----CGTACCGTGAGTAATAATGC-----                                                        | mirR    | 20  | 16280 |

```
-----TCGTACCGTGAGTAATAATGC----- mirR 21 12093
-----CGTACCGTGAGTAATAATGCG---- mirR 21 10439
-----CGTACCGTGAGTAATAATG----- mirR 19 9027
-----CGTACCGTGAGTAATAATGCGCG-- mirR 23 7089
-----TCGTACCGTGAGTAATAATGCG---- mirR 22 6689
-----TCGTACCGTGAGTAATAATG----- mirR 20 4735
-----TCGTACCGTGAGTAATAATGCGCG-- mirR 24 3794
-----TCGTACCGTGAGTAATAAT----- mirR 19 3101
-----CGTACCGTGAGTAATAAT----- mirR 18 3064
-----TCGTACCGTGAGTAATAA----- mirR 18 2150
-----CGTACCGTGAGTAATAATGCGCG-- mirR 24 655
-----CTCGTACCGTGAGTAATAATGC---- mirR 22 552
-----GTACCGTGAGTAATAATGCGC--- mirR 21 113
-----CTCGTACCGTGAGTAATAAT----- mirR 20 81
-----CTCGTACCGTGAGTAATAATG----- mirR 21 49
-----GTACCGTGAGTAATAATGC---- mirR 19 47
-----CTCGTACCGTGAGTAATAA----- mirR 19 37
-----GTACCGTGAGTAATAATGCGCG-- mirR 22 37
-----CTCGTACCGTGAGTAATAATGCG--- mirR 23 33
-----CTCGTACCGTGAGTAATAATGCGC-- mirR 24 31
-----CTCGTACCGTGAGTAATA----- mirR 18 25
-----GTACCGTGAGTAATAATGCG---- mirR 20 18
-----TACCGTGAGTAATAATGCGC--- mirR 20 13
-----GTACCGTGAGTAATAATG----- mirR 18 13
-----ACCGTGAGTAATAATGCGC--- mirR 19 8
-----TACCGTGAGTAATAATGCGCG-- mirR 21 6
-----TACCGTGAGTAATAATGCGCGG-- mirR 22 4
-----ACCGTGAGTAATAATGCGCG-- mirR 20 3
-----TACCGTGAGTAATAATGC----- mirR 18 3
-----ACCGTGAGTAATAATGCGCGG-- mirR 21 2
-----ACTCGTACCGTGAGTAATAATGC---- mirR 23 2
-----ACTCGTACCGTGAGTAATAAT----- mirR 21 2
-----ACTCGTACCGTGAGTAATAATG----- mirR 22 1
-----ACCGTGAGTAATAATGCGCGGT mirR 22 1
-----TACCGTGAGTAATAATGCG---- mirR 19 1
-----GTACCGTGAGTAATAATGCGCGG-- mirR 23 1
```

>mmu-mir-145

```
CTCTCTCCACCTTGTCTCAGGTCAGTTTCCAGGAATCCCTTGGATGCTAAGATGGGATTCCTGGAATACTGTTCTTGAG species len reads
---TCTCCACCTTGTCTCAGG----- morL 21 1
--CTCTCCACCTTGTCTC----- morL 18 1
-TCTCTCCACCTTGTCTC----- morL 19 1
CTCTCTCCACCTTGTCTCA----- morL 21 1
-----GTCCAGTTTCCAGGAATCCC----- mirL 22 204206
-----GTCCAGTTTCCAGGAATCCCT----- mirL 23 86029
-----GTCCAGTTTCCAGGAATC----- mirL 20 63415
```

```

-----GTCAGTTTTCCAGGAATCCCTT----- mirL 24 4556
-----GTCAGTTTTCCAGGAATCC----- mirL 21 37961
-----TCCAGTTTTCCAGGAATCCCT----- mirL 22 160
-----TCCAGTTTTCCAGGAATCCCTT----- mirL 23 124
-----TCCAGTTTTCCAGGAATCCC----- mirL 21 100
-----CCAGTTTTCCAGGAATCCCT----- mirL 21 89
-----GGTCCAGTTTTCCAGGAATCCC----- mirL 23 69
-----TCCAGTTTTCCAGGAATCC----- mirL 20 62
-----CCAGTTTTCCAGGAATCCCT----- mirL 22 41
-----CGGTCCAGTTTTCCAGGAATCCC----- mirL 24 25
-----TCCAGTTTTCCAGGAATC----- mirL 19 21
-----CAGTTTTCCAGGAATCCCT----- mirL 20 21
-----GGTCCAGTTTTCCAGGAATCCCT----- mirL 24 19
-----CCAGTTTTCCAGGAATCC----- mirL 19 16
-----CAGTTTTCCAGGAATCCCT----- mirL 21 13
-----CCAGTTTTCCAGGAATCCC----- mirL 20 13
-----CCAGTTTTCCAGGAATC----- mirL 18 9
-----GGTCCAGTTTTCCAGGAATC----- mirL 21 8
-----CAGTTTTCCAGGAATCCC----- mirL 19 7
-----GGTCCAGTTTTCCAGGAATCC----- mirL 22 7
-----GGTCCAGTTTTCCAGGAATCCCT----- mirL 25 5
-----CAGTTTTCCAGGAATCCCTTG----- mirL 22 3
-----CGGTCCAGTTTTCCAGGAATCC----- mirL 23 2
-----CGGTCCAGTTTTCCAGGAATCCCTTG----- mirL 27 2
-----CGGTCCAGTTTTCCAGGAATCCCT----- mirL 25 2
-----ACGGTCCAGTTTTCCAG----- mirL 18 1
-----CAGTTTTCCAGGAATCC----- mirL 18 1
-----CGGTCCAGTTTTCCAGGAAT----- mirL 21 1
-----CCTTGGATGCTAAGATGGG----- loop 19 2
-----CCCTTGGATGCTAAGATG----- loop 18 1
-----GGATTCCTGGAATACTGTTCT----- mirR 22 125
-----GATTCCTGGAATACTGTTCTT----- mirR 22 100
-----GGATTCCTGGAATACTGTTCT----- mirR 21 94
-----ATTCCTGGAATACTGTTCTT----- mirR 21 86
-----GATTCCTGGAATACTGTTCT----- mirR 21 59
-----ATTCCTGGAATACTGTTCT----- mirR 20 51
-----ATTCCTGGAATACTGTTCT----- mirR 19 38
-----GGATTCCTGGAATACTGTTCTT----- mirR 23 25
-----GATTCCTGGAATACTGTTCT----- mirR 20 23
-----ATTCCTGGAATACTGTTCTTG----- mirR 22 15
-----GGATTCCTGGAATACTGTT----- mirR 20 13
-----GGATTCCTGGAATACTGT----- mirR 19 11
-----GATTCCTGGAATACTGTTCTTG----- mirR 23 8
-----GATTCCTGGAATACTGTT----- mirR 19 5
-----GGATTCCTGGAATACTG----- mirR 18 3
-----GGATTCCTGGAATACTGTTCTTG----- mirR 24 3

```

```

-----ATTCCTGGAAATACTGTT----- mirR 18 3
-----TTCCTGGAAATACTGTTTC----- mirR 18 1
-----ATTCCTGGAAATACTGTTCTTGAG----- mirR 24 1
-----GATTCCTGGAAATACTGT----- mirR 18 1
-----ATTCCTGGAAATACTGTTCTTGA----- mirR 23 1

>mmu-mir-218-1
TGGAGCGAGATTTTCTGTTTGCTTGATCTAACCATGTGCTTGCGAGGTATGAGAAAAACATGGTTCCGTCAAGCACCATGG species len reads
TGGAGCGAGATTTTCTGTT----- morL 19 1
-----TTGTGCTTGATCTAACCATGT----- mirL 21 256995
-----TTGTGCTTGATCTAACCATGTG----- mirL 22 77217
-----TTGTGCTTGATCTAACCATGTGC----- mirL 23 46160
-----TTGTGCTTGATCTAACCATG----- mirL 20 15862
-----TGTGCTTGATCTAACCATGT----- mirL 20 14491
-----TTGTGCTTGATCTAACCAT----- mirL 19 9869
-----TGTGCTTGATCTAACCATGTG----- mirL 21 5481
-----TGTGCTTGATCTAACCATG----- mirL 19 1212
-----TGTGCTTGATCTAACCATGTGC----- mirL 22 728
-----TGTGCTTGATCTAACCAT----- mirL 18 280
-----GTGCTTGATCTAACCATGT----- mirL 19 75
-----GTGCTTGATCTAACCATGTG----- mirL 20 31
-----TGCTTGATCTAACCATGT----- mirL 18 20
-----TGCTTGATCTAACCATGTG----- mirL 19 10
-----GTTGTGCTTGATCTAACCATGT----- mirL 22 5
-----GTGCTTGATCTAACCATGTGC----- mirL 21 4
-----TGCTTGATCTAACCATGTGC----- mirL 20 3
-----GTGCTTGATCTAACCATG----- mirL 18 3
-----TGCTTGATCTAACCATGTGCTT----- mirL 22 2
-----CTGTTGTGCTTGATCTAACCATGT----- mirL 24 2
-----GTTGTGCTTGATCTAACCATGTGC----- mirL 24 1
-----GTTGTGCTTGATCTAACCATGTG----- mirL 23 1
-----TGTGCTTGCGAGGTATGA----- loop 18 3
-----AAACATGGTTCCGTCAAGCAC----- mirR 21 68
-----AAACATGGTTCCGTCAAGCACC----- mirR 22 54
-----AAACATGGTTCCGTCAAGCA----- mirR 20 28
-----AAACATGGTTCCGTCAAGCACCA--- mirR 23 22
-----AAACATGGTTCCGTCAAGC----- mirR 19 17
-----AAACATGGTTCCGTCAAGCACCAT-- mirR 24 7
-----CATGGTTCCGTCAAGCACC----- mirR 19 7
-----CATGGTTCCGTCAAGCACCATG- mirR 22 6
-----CATGGTTCCGTCAAGCACCA--- mirR 20 6
-----AAACATGGTTCCGTCAAG----- mirR 18 5
-----CATGGTTCCGTCAAGCAC----- mirR 18 4
-----ACATGGTTCCGTCAAGCACCA--- mirR 21 3
-----CATGGTTCCGTCAAGCACCAT-- mirR 21 3
-----AACATGGTTCCGTCAAGCAC----- mirR 20 2

```

```

-----AACATGGTTCCGTCAAGCACCAT-- mirR 23 2
-----AACATGGTTCCGTCAAGCACC---- mirR 21 1
-----AACATGGTTCCGTCAAGC----- mirR 18 1
-----CATGGTTCCGTCAAGCACCATGG mirR 23 1
-----ACATGGTTCCGTCAAGCACC---- mirR 20 1
-----AACATGGTTCCGTCAAGCACCATG- mirR 24 1
-----AACATGGTTCCGTCAAGCA----- mirR 19 1

```

>mmu-let-7g

| TTGCCTGATTCCAGGCTGAGGTAGTAGTTTGTACAGTTTGTAGGGTCTATGATACCACCCGGTACAGGAGATAACTGTACAGGCCACTGCCTTGCCAGGAACAGTGCACCAGCTACCAA | species | len | reads  |
|-------------------------------------------------------------------------------------------------------------------------|---------|-----|--------|
| TTGCCTGATTCCAGGCTGA-----                                                                                                | morL    | 19  | 1      |
| -----TGAGGTAGTAGTTTGTACAGTT-----                                                                                        | mirL    | 22  | 176503 |
| -----TGAGGTAGTAGTTTGTACAG-----                                                                                          | mirL    | 20  | 60024  |
| -----TGAGGTAGTAGTTTGTAC-----                                                                                            | mirL    | 18  | 50094  |
| -----TGAGGTAGTAGTTTGTACAGT-----                                                                                         | mirL    | 21  | 49731  |
| -----TGAGGTAGTAGTTTGTACAGTTT-----                                                                                       | mirL    | 23  | 45952  |
| -----GAGGTAGTAGTTTGTACAGTT-----                                                                                         | mirL    | 21  | 4320   |
| -----GAGGTAGTAGTTTGTACAG-----                                                                                           | mirL    | 19  | 1785   |
| -----GAGGTAGTAGTTTGTACAGTTT-----                                                                                        | mirL    | 22  | 1633   |
| -----GAGGTAGTAGTTTGTACAGT-----                                                                                          | mirL    | 20  | 1162   |
| -----CTGAGGTAGTAGTTTGTACAGTT-----                                                                                       | mirL    | 23  | 418    |
| -----CTGAGGTAGTAGTTTGTAC-----                                                                                           | mirL    | 19  | 334    |
| -----GAGGTAGTAGTTTGTACAGTTTG-----                                                                                       | mirL    | 23  | 308    |
| -----CTGAGGTAGTAGTTTGTACAG-----                                                                                         | mirL    | 21  | 222    |
| -----CTGAGGTAGTAGTTTGTACAGT-----                                                                                        | mirL    | 22  | 220    |
| -----CTGAGGTAGTAGTTTGTACAGTTT-----                                                                                      | mirL    | 24  | 115    |
| -----GGTAGTAGTTTGTACAGTT-----                                                                                           | mirL    | 19  | 59     |
| -----AGGTAGTAGTTTGTACAGTT-----                                                                                          | mirL    | 20  | 21     |
| -----GGTAGTAGTTTGTACAGTTT-----                                                                                          | mirL    | 20  | 17     |
| -----GGTAGTAGTTTGTACAGT-----                                                                                            | mirL    | 18  | 10     |
| -----AGGTAGTAGTTTGTACAGT-----                                                                                           | mirL    | 19  | 9      |
| -----AGGTAGTAGTTTGTACAG-----                                                                                            | mirL    | 18  | 6      |
| -----AGGTAGTAGTTTGTACAGTTT-----                                                                                         | mirL    | 21  | 4      |
| -----GCTGAGGTAGTAGTTTGTACAGTTT-----                                                                                     | mirL    | 25  | 3      |
| -----GCTGAGGTAGTAGTTTGTAC-----                                                                                          | mirL    | 20  | 3      |
| -----AGGTAGTAGTTTGTACAGTTTG-----                                                                                        | mirL    | 22  | 2      |
| -----GCTGAGGTAGTAGTTTGTACAGT-----                                                                                       | mirL    | 23  | 1      |
| -----GCTGAGGTAGTAGTTTGTACAG-----                                                                                        | mirL    | 22  | 1      |
| -----GGTAGTAGTTTGTACAGTTTGAGG-----                                                                                      | mirL    | 24  | 1      |
| -----GGCTGAGGTAGTAGTTTGTAC-----                                                                                         | mirL    | 21  | 1      |
| -----GGTAGTAGTTTGTACAGTTTGA-----                                                                                        | mirL    | 22  | 1      |
| -----GGCTGAGGTAGTAGTTTGTACAGTT-----                                                                                     | mirL    | 25  | 1      |
| -----GCTGAGGTAGTAGTTTGTACAGT-----                                                                                       | mirL    | 24  | 1      |
| -----GGCTGAGGTAGTAGTTTGTACAGT-----                                                                                      | mirL    | 24  | 1      |
| -----CTGTACAGGCCACTGCCTTGCC-----                                                                                        | mirR    | 22  | 1843   |
| -----CTGTACAGGCCACTGCCTTGC-----                                                                                         | mirR    | 21  | 639    |

```

-----ACTGTACAGGCCACTGCCTTGC----- mirR 22 212
-----CTGTACAGGCCACTGCCTTG----- mirR 20 107
-----CTGTACAGGCCACTGCCTTGCCA----- mirR 23 99
-----CTGTACAGGCCACTGCCTTGCCAG----- mirR 24 95
-----CTGTACAGGCCACTGCCTT----- mirR 19 84
-----CTGTACAGGCCACTGCCT----- mirR 18 75
-----ACTGTACAGGCCACTGCCTTGCC----- mirR 23 18
-----TGTACAGGCCACTGCCTTGCCAG----- mirR 23 13
-----TGTACAGGCCACTGCCTTGCCA----- mirR 22 13
-----TGTACAGGCCACTGCCTTGCC----- mirR 21 12
-----ACTGTACAGGCCACTGCCTTG----- mirR 21 11
-----TGTACAGGCCACTGCCTTGC----- mirR 20 10
-----AACTGTACAGGCCACTGCCTTGC----- mirR 23 9
-----ACTGTACAGGCCACTGCCT----- mirR 19 6
-----ACTGTACAGGCCACTGCC----- mirR 18 6
-----ACTGTACAGGCCACTGCCTT----- mirR 20 6
-----AACTGTACAGGCCACTGCC----- mirR 19 2
-----AACTGTACAGGCCACTGCCTTGCC----- mirR 24 2
-----TAACTGTACAGGCCACTGCC----- mirR 20 1
-----TGTACAGGCCACTGCCTTGCCAGG----- mirR 24 1
-----GTACAGGCCACTGCCTTGC----- mirR 19 1
-----ACTGTACAGGCCACTGCCTTGCCAG----- mirR 25 1
-----AACTGTACAGGCCACTGCCTTGCCA----- mirR 25 1
-----TACAGGCCACTGCCTTGC----- mirR 18 1
-----TGTACAGGCCACTGCCTTGCCAGGA----- mirR 25 1
-----AACTGTACAGGCCACTGCCTTG----- mirR 22 1
-----GAACAGTGCACCAGCTACC-- morR 19 2
-----AACAGTGCACCAGCTACC-- morR 18 1
-----CCAGGAACAGTGCACCAGC----- morR 19 1
-----GGAACAGTGCACCAGCTA---- morR 18 1
-----GAACAGTGCACCAGCTACCAA morR 21 1

```

>mmu-mir-139

```

CAGGACAGGCGCAGGTGTATTCTACAGTGCACGTGTCTCCAGTGTGGCTCGGAGGCTGGAGACGCGGCCCTGTGGAGTAACAAGTGAAGCC species len reads
CAGGACAGGCGCAGGTGTAT----- morL 20 2
-----TCTACAGTGCACGTGTCTCCAG----- mirL 22 136707
-----TCTACAGTGCACGTGTCTCCA----- mirL 21 76786
-----TCTACAGTGCACGTGTCTCC----- mirL 20 69435
-----TCTACAGTGCACGTGTCTCCAGT----- mirL 23 52716
-----TCTACAGTGCACGTGTCTC----- mirL 19 31321
-----CTACAGTGCACGTGTCTCCAG----- mirL 21 9117
-----CTACAGTGCACGTGTCTCC----- mirL 19 6083
-----CTACAGTGCACGTGTCTCCA----- mirL 20 5081
-----CTACAGTGCACGTGTCTCCAGT----- mirL 22 4564
-----CTACAGTGCACGTGTCTC----- mirL 18 1251
-----TTCTACAGTGCACGTGTCTCCA----- mirL 22 110

```

```

-----TTCTACAGTGCACGTGTCTCC----- mirL 21 69
-----TTCTACAGTGCACGTGTCTCCAG----- mirL 23 53
-----TTCTACAGTGCACGTGTCTCCAGTG----- mirL 25 36
-----ACAGTGCACGTGTCTCCAG----- mirL 19 32
-----TTCTACAGTGCACGTGTCTC----- mirL 20 31
-----ACAGTGCACGTGTCTCCAGT----- mirL 20 22
-----TACAGTGCACGTGTCTCCAG----- mirL 20 18
-----TACAGTGCACGTGTCTCCAGT----- mirL 21 14
-----ACAGTGCACGTGTCTCCAGTG----- mirL 21 12
-----TACAGTGCACGTGTCTCCA----- mirL 19 11
-----ACAGTGCACGTGTCTCCA----- mirL 18 11
-----ATTCTACAGTGCACGTGTCTCC----- mirL 22 10
-----TACAGTGCACGTGTCTCC----- mirL 18 9
-----TACAGTGCACGTGTCTCCAGTG----- mirL 22 8
-----TATTCTACAGTGCACGTGTCTCC----- mirL 23 3
-----ATTCTACAGTGCACGTGTCTC----- mirL 21 2
-----TATTCTACAGTGCACGTGTC----- mirL 20 1
-----ATTCTACAGTGCACGTGTC----- mirL 19 1
-----ACAGTGCACGTGTCTCCAGTGT----- mirL 22 1
-----ATTCTACAGTGCACGTGTCTCCAG----- mirL 24 1
-----TGGAGACGCGGCCCTGTTGG----- mirR 20 307
-----TGGAGACGCGGCCCTGTTGGA----- mirR 21 267
-----TGGAGACGCGGCCCTGTTG----- mirR 19 254
-----TGGAGACGCGGCCCTGTTGGAG----- mirR 22 158
-----TGGAGACGCGGCCCTGTTGGAGT----- mirR 23 145
-----TGGAGACGCGGCCCTGTT----- mirR 18 49
-----TGGAGACGCGGCCCTGTTGGAGTA----- mirR 24 49
-----GGAGACGCGGCCCTGTTGGAGT----- mirR 22 26
-----AGACGCGGCCCTGTTGGAGTAAC----- mirR 23 18
-----GGAGACGCGGCCCTGTTG----- mirR 18 18
-----GGAGACGCGGCCCTGTTGGA----- mirR 20 17
-----AGACGCGGCCCTGTTGGAGTAA----- mirR 22 17
-----GGAGACGCGGCCCTGTTGGAGTA----- mirR 23 17
-----GGAGACGCGGCCCTGTTG----- mirR 19 16
-----AGACGCGGCCCTGTTGGAGTA----- mirR 21 10
-----GGAGACGCGGCCCTGTTGGAG----- mirR 21 8
-----AGACGCGGCCCTGTTGGAG----- mirR 19 6
-----AGACGCGGCCCTGTTGGAGT----- mirR 20 5
-----AGACGCGGCCCTGTTGGA----- mirR 18 5
-----GCTGGAGACGCGGCCCTG----- mirR 18 2
-----GAGACGCGGCCCTGTTGGAGTA----- mirR 22 1
-----AGACGCGGCCCTGTTGGAGTAACA----- mirR 24 1
-----GCTGGAGACGCGGCCCTGTT----- mirR 20 1
-----GCTGGAGACGCGGCCCTGTTGGAGTA----- mirR 26 1
-----CTGGAGACGCGGCCCTGTTG----- mirR 20 1
-----GAGACGCGGCCCTGTTGGAGT----- mirR 21 1

```

```

-----TGGAGTAACAACTGAAGCC morR 19 1

>mmu-mir-218-2
GTTGCCGCGGGGCTTTCCTTGTGCTTGATCTAACCATGTGGTGGAAACGATGGAAACGGAACATGGTTCTGTCAAGCACC GCGAAAGCATCGCTCTCTCCTGCAGCATGG species len reads
GTTGCCGCGGGGCTTTC-----morL 18 1
-----TTGTGCTTGATCTAACCATGT-----mirL 21 257812
-----TTGTGCTTGATCTAACCATGT-----mirL 22 77279
-----TTGTGCTTGATCTAACCATG-----mirL 20 15884
-----TGTGCTTGATCTAACCATGT-----mirL 20 14492
-----TTGTGCTTGATCTAACCAT-----mirL 19 9964
-----TTGTGCTTGATCTAACC-----mirL 18 5652
-----TGTGCTTGATCTAACCATGTG-----mirL 21 5554
-----TGTGCTTGATCTAACCATG-----mirL 19 1212
-----TGTGCTTGATCTAACCATGTGG-----mirL 22 666
-----TGTGCTTGATCTAACCAT-----mirL 18 281
-----GTGCTTGATCTAACCATGT-----mirL 19 75
-----GTGCTTGATCTAACCATGTG-----mirL 20 31
-----TGCTTGATCTAACCATGT-----mirL 18 20
-----TTTGTGCTTGATCTAACCATGT-----mirL 22 16
-----TGCTTGATCTAACCATGTG-----mirL 19 10
-----TTTGTGCTTGATCTAACCATGTG-----mirL 23 9
-----TTTGTGCTTGATCTAACC-----mirL 18 7
-----TTTGTGCTTGATCTAACCATGTGG-----mirL 24 4
-----TGCTTGATCTAACCATGTGGTG-----mirL 23 3
-----GTGCTTGATCTAACCATG-----mirL 18 3
-----CTTTGTGCTTGATCTAACCATGT-----mirL 23 3
-----TTTGTGCTTGATCTAACCAT-----mirL 20 3
-----CTTTGTGCTTGATCTAACC-----mirL 19 2
-----CCTTTGTGCTTGATCTAACCATGT-----mirL 24 2
-----TGCTTGATCTAACCATGTGG-----mirL 20 1
-----CCTTTGTGCTTGATCTAACCATGTG-----mirL 25 1
-----TGCTTGATCTAACCATGTGGTG-----mirL 22 1
-----TGGAACGATGGAAACGGAAC-----loop 20 12
-----GTGGAACGATGGAAACGGAACA-----loop 22 1
-----GGTGAACGATGGAAACGGAACA-----loop 23 1
-----GGTGAACGATGGAAACGGAAC-----loop 22 1
-----TGGAACGATGGAAACGGA-----loop 18 1
-----GTGGAACGATGGAAACGGAAC-----loop 21 1
-----GTGGAACGATGGAAACGGAA-----loop 20 1
-----TGGAACGATGGAAACGGAACA-----loop 21 1
-----CATGGTTCTGTCAAGCACC G-----mirR 21 369
-----CATGGTTCTGTCAAGCACC-----mirR 19 248
-----CATGGTTCTGTCAAGCACC G-----mirR 22 237
-----CATGGTTCTGTCAAGCACC-----mirR 20 211
-----CATGGTTCTGTCAAGCAC-----mirR 18 169
-----CATGGTTCTGTCAAGCACC G-----mirR 23 105

```



```

-----ATGGTTCTGTCAAGCACCGCG----- mirR 21 71
-----ATGGTTCTGTCAAGCACCC----- mirR 18 50
-----ATGGTTCTGTCAAGCACCGCG----- mirR 22 36
-----ATGGTTCTGTCAAGCACCG----- mirR 19 36
-----ATGGTTCTGTCAAGCACCGC----- mirR 20 28
-----CATGGTTCTGTCAAGCACCGCGA----- mirR 24 18
-----ATGGTTCTGTCAAGCACCGCGA----- mirR 23 7
-----GAACATGGTTCTGTCAAGCAC----- mirR 21 2
-----AACATGGTTCTGTCAAGCAC----- mirR 21 1
-----ACATGGTTCTGTCAAGCAC----- mirR 20 1
-----GGTTCTGTCAAGCACCGCG----- mirR 19 1
-----ACATGGTTCTGTCAAGCACCGCG----- mirR 23 1
-----TGGTTCTGTCAAGCACCGCG----- mirR 20 1
-----AACATGGTTCTGTCAAGCACCG----- mirR 22 1
-----AAAGCATCGCTCTCTCCT----- morR 18 1
-----CGGAAAGCATCGCTCTCT----- morR 18 1
-----GAAAGCATCGCTCTCTCCTGCAGCATGG morR 28 1

```

>mmu-mir-487b

```

TGGAGAGTGGTTATCCCTGTCCCTCTCGCTTCACTCATGCCGAATCGTACAGGGTCATCCACTTTTTC species len reads
--GAGAGTGGTTATCCCTGTCCCT----- mirL 22 47
--GAGAGTGGTTATCCCTGTCCCT----- mirL 21 16
--GAGAGTGGTTATCCCTGTCC----- mirL 20 12
--GAGAGTGGTTATCCCTGTCCCT----- mirL 23 7
----AGTGGTTATCCCTGTCCCTCTT----- mirL 21 6
--GAGAGTGGTTATCCCTGTCCCTTT----- mirL 24 6
TGGAGAGTGGTTATCCCTG----- mirL 19 3
----AGTGGTTATCCCTGTCCCT----- mirL 20 2
--AGAGTGGTTATCCCTGTCCCT----- mirL 20 1
--AGAGTGGTTATCCCTGTCC----- mirL 19 1
----AGTGGTTATCCCTGTCCCTTTC----- mirL 22 1
-----GCTTCACTCATGCCGAAT----- loop 18 2
-----AATCGTACAGGGTCATCCACTT---- mirR 22 236004
-----AATCGTACAGGGTCATCCACTTT--- mirR 23 38508
-----AATCGTACAGGGTCATCCACT----- mirR 21 24865
-----AATCGTACAGGGTCATCCAC----- mirR 20 20728
-----ATCGTACAGGGTCATCCACTTT--- mirR 22 18762
-----AATCGTACAGGGTCATCC----- mirR 18 12108
-----ATCGTACAGGGTCATCCACTT---- mirR 21 8599
-----AATCGTACAGGGTCATCCA----- mirR 19 6186
-----ATCGTACAGGGTCATCCAC----- mirR 19 3003
-----ATCGTACAGGGTCATCCACTTTT--- mirR 23 1773
-----AATCGTACAGGGTCATCCACTTTT--- mirR 24 1547
-----ATCGTACAGGGTCATCCACT----- mirR 20 1010
-----TCGTACAGGGTCATCCACTTT--- mirR 21 647
-----ATCGTACAGGGTCATCCA----- mirR 18 364

```

```

-----TCGTACAGGGTCATCCACTT---- mirR 20 360
-----TCGTACAGGGTCATCCACTTTT-- mirR 22 311
-----ATCGTACAGGGTCATCCACTTTTTC mirR 25 176
-----CGTACAGGGTCATCCACTT---- mirR 19 125
-----TCGTACAGGGTCATCCACTTTTTTC mirR 24 98
-----TCGTACAGGGTCATCCAC----- mirR 18 90
-----CGTACAGGGTCATCCACTTT-- mirR 20 82
-----TCGTACAGGGTCATCCACTTTTT- mirR 23 73
-----TCGTACAGGGTCATCCACT----- mirR 19 51
-----GAATCGTACAGGGTCATCCACTT-- mirR 23 47
-----CGTACAGGGTCATCCACTTTTT-- mirR 21 31
-----CGTACAGGGTCATCCACTTTTTTC mirR 23 15
-----CGTACAGGGTCATCCACT----- mirR 18 11
-----GAATCGTACAGGGTCATCCAC----- mirR 21 8
-----GAATCGTACAGGGTCATCCACTTTT-- mirR 25 4
-----GAATCGTACAGGGTCATCCACT----- mirR 22 4
-----CGAATCGTACAGGGTCATCCACTT-- mirR 24 3
-----GAATCGTACAGGGTCATCC----- mirR 19 3
-----CGTACAGGGTCATCCACTTTTTT- mirR 22 3
-----GAATCGTACAGGGTCATCCACTTT-- mirR 24 2
-----CGAATCGTACAGGGTCATCC----- mirR 20 1
-----CCGAATCGTACAGGGTCAT----- mirR 19 1
-----GAATCGTACAGGGTCATC----- mirR 18 1
-----CCGAATCGTACAGGGTCATCC----- mirR 21 1
-----CCGAATCGTACAGGGTCATCCAC----- mirR 23 1

```

>mmu-mir-129-2

```

GGGTAGACTGCCTTTCGCGAATCTTTTTCGGTCTGGGCTTGCTGTACATAACTCAATAGCCGGAAGCCCTTACCCAAAAAGCATTTCG species len reads
GGGTAGACTGCCTTTCGCGAAT----- morL 22 1
--GTAGACTGCCTTTCGCGAA----- morL 19 1
-----CTTTTTCGGTCTGGGCTTGC----- mirL 21 29883
-----CTTTTTCGGTCTGGGCTTGCT----- mirL 22 7001
-----CTTTTTCGGTCTGGGCTTG----- mirL 20 3392
-----CTTTTTCGGTCTGGGCTT----- mirL 19 2827
-----CTTTTTCGGTCTGGGCT----- mirL 18 856
-----TTTTTTCGGTCTGGGCTTGC----- mirL 20 35
-----TTTTTTCGGTCTGGGCTTGCTGT----- mirL 23 15
-----TTTTTTCGGTCTGGGCTTGCT----- mirL 21 14
-----TTTTTTCGGTCTGGGCTTGC----- mirL 19 11
-----TCTTTTTCGGTCTGGGCTTGC----- mirL 22 11
-----TTTTTTCGGTCTGGGCTTGCTGT----- mirL 22 7
-----TTTTTTCGGTCTGGGCTTGCT----- mirL 20 7
-----TTTTTTCGGTCTGGGCTTGCTGT----- mirL 22 7
-----TCTTTTTCGGTCTGGGCTTG----- mirL 21 6
-----TTTTTTCGGTCTGGGCTTG----- mirL 19 5
-----TTTTTTCGGTCTGGGCTTG----- mirL 19 5
-----TTTTTTCGGTCTGGGCTTGCT----- mirL 19 5

```

```
-----TTTGCGGTCTGGGCTTGC----- mirL 18 5
-----ATCTTTTGGCGTCTGGGCTTGC----- mirL 23 3
-----TTTGGCGTCTGGGCTTGTGTAC----- mirL 24 2
-----TTTGGCGTCTGGGCTTGC----- mirL 18 2
-----TCTTTTGGCGTCTGGGCTT----- mirL 20 1
-----ATCTTTTGGCGTCTGGGC----- mirL 19 1
-----TTTGGCGTCTGGGCTTGTGT----- mirL 21 1
-----TGTACATAACTCAATAGCCGG----- loop 21 4
-----TGTACATAACTCAATAGCCGGA----- loop 22 4
-----TGTACATAACTCAATAGCCG----- loop 20 3
-----TGTACATAACTCAATAGCCGAA----- loop 23 2
-----GTACATAACTCAATAGCCG----- loop 19 1
-----TGTACATAACTCAATAGCC----- loop 19 1
-----AAGCCCTTACCCCAAAAAGCAT--- mirR 22 196584
-----AAGCCCTTACCCCAAAAAGC---- mirR 20 32525
-----AAGCCCTTACCCCAAAAAGCA--- mirR 21 20104
-----AAGCCCTTACCCCAAAAAGCATT-- mirR 23 17816
-----AAGCCCTTACCCCAAAAAGCATT- mirR 24 12652
-----AAGCCCTTACCCCAAAAAG---- mirR 19 4678
-----AAGCCCTTACCCCAAAA----- mirR 18 2399
-----AGCCCTTACCCCAAAAAGCATT- mirR 23 954
-----AGCCCTTACCCCAAAAAGCAT--- mirR 21 643
-----AGCCCTTACCCCAAAAAGCATT-- mirR 22 398
-----AGCCCTTACCCCAAAAAGC---- mirR 19 294
-----GAAGCCCTTACCCCAAAAAGC---- mirR 21 51
-----GAAGCCCTTACCCCAAAAAGCA--- mirR 22 43
-----GCCCTTACCCCAAAAAGCAT--- mirR 20 43
-----GGAAGCCCTTACCCCAAAA----- mirR 18 43
-----GGAAGCCCTTACCCCAAAAAGC---- mirR 22 42
-----GAAGCCCTTACCCCAAAA----- mirR 18 33
-----AGCCCTTACCCCAAAAAGCA--- mirR 20 30
-----GAAGCCCTTACCCCAAAAAGCAT--- mirR 23 27
-----GAAGCCCTTACCCCAAAA----- mirR 19 17
-----GGAAGCCCTTACCCCAAAA----- mirR 19 16
-----GGAAGCCCTTACCCCAAAA----- mirR 20 13
-----GAAGCCCTTACCCCAAAAAG----- mirR 20 11
-----GGAAGCCCTTACCCCAAAAAGCAT--- mirR 24 11
-----GGAAGCCCTTACCCCAAAAAGCA--- mirR 23 10
-----AGCCCTTACCCCAAAAAG---- mirR 18 10
-----CCCTTACCCCAAAAAGCAT--- mirR 19 9
-----GGAAGCCCTTACCCCAAAAAG---- mirR 21 6
-----GCCCTTACCCCAAAAAGCATT-- mirR 21 6
-----AGCCCTTACCCCAAAAAGCATT- mirR 24 5
-----GAAGCCCTTACCCCAAAAAGCATT- mirR 25 4
-----CCCTTACCCCAAAAAGCATT-- mirR 20 3
-----GCCCTTACCCCAAAAAGCA--- mirR 19 3
```

```
-----GCCCTTACCCCAAAAAGCATTC- mirR 22 1
-----CCCTTACCCCAAAAAGCA---- mirR 18 1
-----GCCCTTACCCCAAAAAGC---- mirR 18 1
```

>mmu-mir-24-2

```
CTCTCTCCGGGCTCCGCCTCCCGTGCCTACTGAGCTGAAACAGTTGATTCCAGTGCCTGGCTCAGTTCAGCAGGAACAGGAGTCCAGCCCCCTAGGA species len reads
--CTCTCCGGGCTCCGCCTCC-- morL 19 2
-TCTCTCCGGGCTCCGCCTCCC-- morL 21 1
CTCTCTCCGGGCTCCGCCTC- morL 20 1
-----GTGCCTACTGAGCTGAAACAGT- mirL 22 1031
-----GTGCCTACTGAGCTGAAACAG- mirL 21 1025
-----GTGCCTACTGAGCTGAAAC- mirL 19 275
-----GTGCCTACTGAGCTGAAACA- mirL 20 160
-----GTGCCTACTGAGCTGAAACAGTT- mirL 23 153
-----TGCCTACTGAGCTGAAACAGT- mirL 21 21
-----TGCCTACTGAGCTGAAACAG- mirL 20 9
-----TGCCTACTGAGCTGAAAC- mirL 18 8
-----TGCCTACTGAGCTGAAACAGTT- mirL 22 6
-----TGCCTACTGAGCTGAAACA- mirL 19 5
-----CGTGCCTACTGAGCTGAAACAG- mirL 22 4
-----CGTGCCTACTGAGCTGAAACAGT- mirL 23 2
-----CGTGCCTACTGAGCTGAA- mirL 18 1
-----GCCTACTGAGCTGAAACAG- mirL 19 1
-----CGTGCCTACTGAGCTGAAAC- mirL 20 1
-----CGTGCCTACTGAGCTGAAACAGTTGA- mirL 26 1
-----CCTACTGAGCTGAAACAGT- mirL 19 1
-----TGGCTCAGTTCAGCAGGAACAG- mirR 22 171582
-----TGGCTCAGTTCAGCAGGAACAGG- mirR 23 64407
-----TGGCTCAGTTCAGCAGGAACA- mirR 21 34557
-----TGGCTCAGTTCAGCAGGAAC- mirR 20 28560
-----GGCTCAGTTCAGCAGGAACAG- mirR 21 6646
-----GGCTCAGTTCAGCAGGAACAGG- mirR 22 6295
-----TGGCTCAGTTCAGCAGGAA- mirR 19 4742
-----TGGCTCAGTTCAGCAGGA- mirR 18 4030
-----TGGCTCAGTTCAGCAGGAACAGGA- mirR 24 3808
-----GGCTCAGTTCAGCAGGAAC- mirR 19 1793
-----GGCTCAGTTCAGCAGGAACA- mirR 20 1310
-----GGCTCAGTTCAGCAGGAACAGGA- mirR 23 593
-----GCTCAGTTCAGCAGGAACAG- mirR 20 444
-----GCTCAGTTCAGCAGGAACAGG- mirR 21 408
-----GCTCAGTTCAGCAGGAACAGGA- mirR 22 361
-----GCTCAGTTCAGCAGGAAC- mirR 18 227
-----GCTCAGTTCAGCAGGAACA- mirR 19 177
-----GGCTCAGTTCAGCAGGAA- mirR 18 169
-----GCTCAGTTCAGCAGGAACAGGAG- mirR 23 143
-----GGCTCAGTTCAGCAGGAACAGGAG- mirR 24 97
```

```

-----CTGGCTCAGTTCAGCAGGAACA----- mirR 22 21
-----GCTCAGTTCAGCAGGAACAGGAGT----- mirR 24 18
-----CTGGCTCAGTTCAGCAGGAACAG----- mirR 23 17
-----CTGGCTCAGTTCAGCAGGAACAGG----- mirR 24 14
-----CTCAGTTCAGCAGGAACAG----- mirR 19 13
-----CTGGCTCAGTTCAGCAGGAAC----- mirR 21 10
-----ACTGGCTCAGTTCAGCAGGAAC----- mirR 22 3
-----CTCAGTTCAGCAGGAACAGG----- mirR 20 2
-----CTGGCTCAGTTCAGCAGGAA----- mirR 20 2
-----CTCAGTTCAGCAGGAACA----- mirR 18 2
-----ACTGGCTCAGTTCAGCAGGAACAG----- mirR 24 1
-----CTGGCTCAGTTCAGCAGG----- mirR 18 1
-----CTCAGTTCAGCAGGAACAGGA----- mirR 21 1
-----GAGTCCAGCCCCCTAGGA morR 18 2
-----GGAGTCCAGCCCCCTAGGA morR 19 1

```

>mmu-mir-24-1

```

CAGCTGTGATTGGACCCGCCCTCCGGTGCCTACTGAGCTGATATCAGTTCTCATTTACACACTGGCTCAGTTCAGCAGGAACAGGAGT species len reads
---TGTGATTGGACCCGCCCTCCG----- morL 21 2
---GTGATTGGACCCGCCCTCCG----- morL 20 1
CAGCTGTGATTGGACCCGCCCTCCG----- morL 25 1
-----GTGCCTACTGAGCTGATATC----- mirL 20 143
-----GTGCCTACTGAGCTGATAT----- mirL 19 70
-----GTGCCTACTGAGCTGATA----- mirL 18 64
-----GTGCCTACTGAGCTGATATCA----- mirL 21 56
-----GGTGCCTACTGAGCTGATAT----- mirL 20 28
-----GTGCCTACTGAGCTGATATCAG----- mirL 22 28
-----GGTGCCTACTGAGCTGATATCA----- mirL 22 27
-----TGCCTACTGAGCTGATATCA----- mirL 19 24
-----GGTGCCTACTGAGCTGATATC----- mirL 21 20
-----TGCCTACTGAGCTGATATCA----- mirL 20 19
-----GGTGCCTACTGAGCTGATATCAG----- mirL 23 14
-----TGCCTACTGAGCTGATAT----- mirL 18 11
-----GGTGCCTACTGAGCTGAT----- mirL 18 10
-----TGCCTACTGAGCTGATATCAGT----- mirL 22 8
-----TGCCTACTGAGCTGATATCAG----- mirL 21 5
-----GCCTACTGAGCTGATATCA----- mirL 19 2
-----GCCTACTGAGCTGATATCAGT----- mirL 21 1
-----TGGCTCAGTTCAGCAGGAACAG----- mirR 22 171582
-----TGGCTCAGTTCAGCAGGAACAGG----- mirR 23 64408
-----TGGCTCAGTTCAGCAGGAACA----- mirR 21 34557
-----TGGCTCAGTTCAGCAGGAAC----- mirR 20 28560
-----GGCTCAGTTCAGCAGGAACAG----- mirR 21 6646
-----GGCTCAGTTCAGCAGGAACAGG----- mirR 22 6295
-----TGGCTCAGTTCAGCAGGAA----- mirR 19 4742
-----TGGCTCAGTTCAGCAGGA----- mirR 18 4030

```

```

-----TGGCTCAGTTCAGCAGGAACAGGA-- mirR 24 3808
-----GGCTCAGTTCAGCAGGAAC----- mirR 19 1793
-----GGCTCAGTTCAGCAGGAACA----- mirR 20 1310
-----GGCTCAGTTCAGCAGGAACAGGA-- mirR 23 593
-----GCTCAGTTCAGCAGGAACAG---- mirR 20 444
-----GCTCAGTTCAGCAGGAACAGG--- mirR 21 408
-----GCTCAGTTCAGCAGGAACAGGA-- mirR 22 361
-----GCTCAGTTCAGCAGGAAC----- mirR 18 227
-----GCTCAGTTCAGCAGGAACA----- mirR 19 177
-----GGCTCAGTTCAGCAGGA----- mirR 18 169
-----GCTCAGTTCAGCAGGAACAGGAG- mirR 23 143
-----GGCTCAGTTCAGCAGGAACAGGAG- mirR 24 97
-----CTGGCTCAGTTCAGCAGGAACA---- mirR 22 21
-----GCTCAGTTCAGCAGGAACAGGAGT mirR 24 18
-----CTGGCTCAGTTCAGCAGGAACAG---- mirR 23 17
-----CTGGCTCAGTTCAGCAGGAACAGG--- mirR 24 14
-----CTCAGTTCAGCAGGAACAG---- mirR 19 13
-----CTGGCTCAGTTCAGCAGGAAC----- mirR 21 10
-----ACTGGCTCAGTTCAGCAGGAAC----- mirR 22 3
-----CTGGCTCAGTTCAGCAGGA----- mirR 20 2
-----CTCAGTTCAGCAGGAACAGG--- mirR 20 2
-----CTCAGTTCAGCAGGAACA----- mirR 18 2
-----CTGGCTCAGTTCAGCAGG----- mirR 18 1
-----ACTGGCTCAGTTCAGCAGGAACAG---- mirR 24 1
-----CTCAGTTCAGCAGGAACAGGA-- mirR 21 1

```

>mmu-let-7c-1

```

GGTTGAGGTAGTAGGTTGTATGGTTTAGAGTTACACCCTGGGAGTTAACTGTACAACCTTCTAGCTTTCCTT species len reads
---TGAGGTAGTAGGTTGTATGGTT----- mirL 22 121597
---TGAGGTAGTAGGTTGTATGGTTT----- mirL 23 67842
---TGAGGTAGTAGGTTGTATGG----- mirL 20 52274
---TGAGGTAGTAGGTTGTATGGT----- mirL 21 46480
---TGAGGTAGTAGGTTGTATG----- mirL 19 17171
---GAGGTAGTAGGTTGTATGGTT----- mirL 21 4893
---GAGGTAGTAGGTTGTATGGTTT----- mirL 22 3758
---GAGGTAGTAGGTTGTATGG----- mirL 19 2341
---GAGGTAGTAGGTTGTATGGT----- mirL 20 1625
---GAGGTAGTAGGTTGTATGGTTTA----- mirL 23 1173
---TTGAGGTAGTAGGTTGTATGGTT----- mirL 23 88
---TTGAGGTAGTAGGTTGTATGG----- mirL 21 63
---TTGAGGTAGTAGGTTGTATGGT----- mirL 22 61
---TTGAGGTAGTAGGTTGTATGGTTTA----- mirL 25 29
---TTGAGGTAGTAGGTTGTATGGTTT----- mirL 24 28
---GGTAGTAGGTTGTATGGTT----- mirL 19 19
---AGGTAGTAGGTTGTATGGTT----- mirL 20 16
-GTTGAGGTAGTAGGTTGTATGGT----- mirL 23 16

```

```

-----GGTAGTAGGTTGTATGGTTT----- mirL 20 14
-----AGGTAGTAGGTTGTATGGTTT----- mirL 21 14
-----AGGTAGTAGGTTGTATGG----- mirL 18 13
-GTTGAGGTAGTAGGTTGTATGGTT----- mirL 24 10
-GTTGAGGTAGTAGGTTGTATGG----- mirL 22 8
-----AGGTAGTAGGTTGTATGGTTTA----- mirL 22 7
-----GGTAGTAGGTTGTATGGTTTA----- mirL 21 7
-----GGTAGTAGGTTGTATGGT----- mirL 18 5
-GTTGAGGTAGTAGGTTGTATGGTTT----- mirL 25 5
-----AGGTAGTAGGTTGTATGGT----- mirL 19 4
GGTTGAGGTAGTAGGTTGTATGGTT----- mirL 25 2
GGTTGAGGTAGTAGGTTGTATGGTTTA----- mirL 27 2
-GTTGAGGTAGTAGGTTGTATG----- mirL 21 1
GGTTGAGGTAGTAGGTTGTATG----- mirL 22 1
GGTTGAGGTAGTAGGTTGTATGGT----- mirL 24 1
-----TAGAGTTACACCTGGGAGT----- loop 20 11
-----TAGAGTTACACCTGGGAGTTAA----- loop 23 8
-----TAGAGTTACACCTGGGAGTTA----- loop 22 8
-----TAGAGTTACACCTGGGAGTTAAC----- loop 24 6
-----TAGAGTTACACCTGGGAGTT----- loop 21 4
-----CTGTACAACCTTCTAGCTTTCC-- mirR 22 360
-----CTGTACAACCTTCTAGCTTTC-- mirR 21 59
-----TGTACAACCTTCTAGCTTTCCCT- mirR 22 21
-----CTGTACAACCTTCTAGCTTT----- mirR 20 17
-----CTGTACAACCTTCTAGCTTTCCCT- mirR 23 11
-----TGTACAACCTTCTAGCTTTCC-- mirR 21 10
-----CTGTACAACCTTCTAGCT----- mirR 18 9
-----AACTGTACAACCTTCTAGC----- mirR 19 4
-----AACTGTACAACCTTCTAGCTTTCC-- mirR 24 4
-----TGTACAACCTTCTAGCTTTC-- mirR 20 3
-----CTGTACAACCTTCTAGCTTTCCCTT mirR 24 2
-----AACTGTACAACCTTCTAGCTTTC-- mirR 23 2
-----GTACAACCTTCTAGCTTTCC-- mirR 20 2
-----TGTACAACCTTCTAGCTTT----- mirR 19 1
-----GTACAACCTTCTAGCTTTC-- mirR 19 1
-----CTGTACAACCTTCTAGCTT----- mirR 19 1
-----ACTGTACAACCTTCTAGCTTTCC-- mirR 23 1

>mmu-let-7c-2
TGACTGACGGCCTTTGGGGTGAGGTAGTAGGTTGTATGGTTTTGGGCTCTGCCCGCTCTGCGGTAACATACAATCTACTGTCTTTCCTGAAG species len reads
TGACTGACGGCCTTTGGG----- morL 18 1
-----TGAGGTAGTAGGTTGTATGGTT----- mirL 22 121597
-----TGAGGTAGTAGGTTGTATGGTTT----- mirL 23 67843
-----TGAGGTAGTAGGTTGTATGG----- mirL 20 52274
-----TGAGGTAGTAGGTTGTATGGT----- mirL 21 46480
-----TGAGGTAGTAGGTTGTATG----- mirL 19 17172

```

```

-----GAGGTAGTAGGTTGTATGGTT----- mirL 21 4893
-----GAGGTAGTAGGTTGTATGGTTT----- mirL 22 3757
-----GAGGTAGTAGGTTGTATGG----- mirL 19 2337
-----GAGGTAGTAGGTTGTATGGT----- mirL 20 1629
-----GAGGTAGTAGGTTGTATGGTTTT----- mirL 23 1198
-----GTGAGGTAGTAGGTTGTATGGTT----- mirL 23 23
-----GGTAGTAGGTTGTATGGTT----- mirL 19 19
-----AGGTAGTAGGTTGTATGGTT----- mirL 20 16
-----AGGTAGTAGGTTGTATGGTTT----- mirL 21 14
-----GGTAGTAGGTTGTATGGTTT----- mirL 20 14
-----AGGTAGTAGGTTGTATGG----- mirL 18 13
-----GTGAGGTAGTAGGTTGTATGGTTT----- mirL 24 9
-----AGGTAGTAGGTTGTATGGTTTT----- mirL 22 9
-----GTGAGGTAGTAGGTTGTATGGTTTT----- mirL 25 8
-----GGTAGTAGGTTGTATGGTTTT----- mirL 21 7
-----GTGAGGTAGTAGGTTGTATG----- mirL 20 6
-----GTGAGGTAGTAGGTTGTATGGT----- mirL 22 5
-----GGTAGTAGGTTGTATGGT----- mirL 18 5
-----AGGTAGTAGGTTGTATGGT----- mirL 19 4
-----GGTGAGGTAGTAGGTTGTATGGT----- mirL 23 2
-----GGTAGTAGGTTGTATGGTTTTG----- mirL 22 1
-----GGTGAGGTAGTAGGTTGTATGGTT----- mirL 24 1
-----GGGTGAGGTAGTAGGTTGTATG----- mirL 22 1
-----TTGGGCTCTGCCCGCTCTGCCG----- loop 23 1
-----CTATACAATCTACTGTCTTTCCTGA-- mirR 25 10
-----CTATACAATCTACTGTCTTTCCTG-- mirR 24 6
-----CTATACAATCTACTGTCTTTCCTGAAG mirR 27 1

```

>mmu-let-7f-2

```

ACACTGGTGCTCTGTGGGATGAGGTAGTAGATTGTATAGTTTTAGGGTCATACCCCATCTTGGAGATAACTATACAGTCTACTGTCTTCCACGGTGGTACACTTCCCATCCA species len reads
ACACTGGTGCTCTGTGGGA----- morL 19 1
-----TGAGGTAGTAGATTGTATAGTT----- mirL 22 136069
-----TGAGGTAGTAGATTGTATAG----- mirL 20 56809
-----TGAGGTAGTAGATTGTATAGT----- mirL 21 48489
-----TGAGGTAGTAGATTGTATAGTTT----- mirL 23 25737
-----TGAGGTAGTAGATTGTATA----- mirL 19 23803
-----GAGGTAGTAGATTGTATAGTT----- mirL 21 3368
-----GAGGTAGTAGATTGTATAG----- mirL 19 1379
-----GAGGTAGTAGATTGTATAGT----- mirL 20 962
-----GAGGTAGTAGATTGTATAGTTT----- mirL 22 852
-----GAGGTAGTAGATTGTATA----- mirL 18 334
-----GGTAGTAGATTGTATAGTT----- mirL 19 38
-----ATGAGGTAGTAGATTGTATAGTT----- mirL 23 14
-----AGGTAGTAGATTGTATAGTT----- mirL 20 14
-----GGTAGTAGATTGTATAGT----- mirL 18 9
-----AGGTAGTAGATTGTATAG----- mirL 18 7

```



```

-----ATGAGGTAGTAGATTGTATAG----- mirL 21 7
-----AGGTAGTAGATTGTATAGTTT----- mirL 21 7
-----AGGTAGTAGATTGTATAGT----- mirL 19 6
-----GGTAGTAGATTGTATAGTTT----- mirL 20 3
-----ATGAGGTAGTAGATTGTATAGTTT----- mirL 24 3
-----ATGAGGTAGTAGATTGTATAGT----- mirL 22 3
-----ATGAGGTAGTAGATTGTATA----- mirL 20 2
-----AGGTAGTAGATTGTATAGTTT----- mirL 23 2
-----GATGAGGTAGTAGATTGTAT----- mirL 20 1
-----GATGAGGTAGTAGATTGTATAGT----- mirL 23 1
-----GATGAGGTAGTAGATTGTATAGTT----- mirL 24 1
-----GGTAGTAGATTGTATAGTTT----- mirL 21 1
-----GATGAGGTAGTAGATTGTATAG----- mirL 22 1
-----GATGAGGTAGTAGATTGTA----- mirL 19 1
-----TTAGGGTCATACCCCATCTTGGAGATA----- loop 28 1
-----CTATACAGTCTACTGTCTTTCC----- mirR 22 10818
-----CTATACAGTCTACTGTCTTTC----- mirR 21 499
-----CTATACAGTCTACTGTCTTTCCC----- mirR 23 80
-----CTATACAGTCTACTGTCTTT----- mirR 20 68
-----CTATACAGTCTACTGTCT----- mirR 18 25
-----CTATACAGTCTACTGTCTT----- mirR 19 19
-----TAACTATACAGTCTACTGTCTTTCC----- mirR 25 6
-----ACTATACAGTCTACTGTCTTTCC----- mirR 23 5
-----TATACAGTCTACTGTCTTTCC----- mirR 21 5
-----AACTATACAGTCTACTGTCTTTC----- mirR 23 4
-----ACTATACAGTCTACTGTCTTTC----- mirR 22 3
-----TAACTATACAGTCTACTGTCTTTCC----- mirR 24 2
-----AACTATACAGTCTACTGTCTTTCC----- mirR 24 2
-----CTATACAGTCTACTGTCTTTCCCA----- mirR 24 2
-----TAACTATACAGTCTACTGTCTT----- mirR 22 1
-----AACTATACAGTCTACTGTCTT----- mirR 21 1
-----ACTATACAGTCTACTGTCTT----- mirR 20 1
-----ATACAGTCTACTGTCTTTCC----- mirR 20 1
-----AACTATACAGTCTACTGTCTTT----- mirR 22 1
-----TAACTATACAGTCTACTGTCTTT----- mirR 23 1
-----ATACAGTCTACTGTCTTTCC----- mirR 19 1
-----CCACGGTGGTACACTTCCCATCCA morR 24 1

```

>mmu-let-7f-1

```

GAGTGAGGTAGTAGATTGTATAGTTGTGGGGTAGTGATTTTACCCTGTTTAGGAGATAACTATACAATCTATTGCCTTCCCTGAGGAGTAGACTTGCTGCATTG species len reads
---TGAGGTAGTAGATTGTATAGTT----- mirL 22 135982
---TGAGGTAGTAGATTGTATAG----- mirL 20 56808
---TGAGGTAGTAGATTGTATAGT----- mirL 21 48489
---TGAGGTAGTAGATTGTATA----- mirL 19 23859
---TGAGGTAGTAGATTGTATAGTTG----- mirL 23 21756
---GAGGTAGTAGATTGTATAGTT----- mirL 21 3366

```

```

----GAGGTAGTAGATTGTATAG----- mirL 19 1379
----GAGGTAGTAGATTGTATAGT----- mirL 20 962
----GAGGTAGTAGATTGTATAGTTG----- mirL 22 735
----GAGGTAGTAGATTGTATA----- mirL 18 334
----GGTAGTAGATTGTATAGTT----- mirL 19 38
----AGGTAGTAGATTGTATAGTTGT----- mirL 22 28
----AGGTAGTAGATTGTATAGTT----- mirL 20 14
----GGTAGTAGATTGTATAGT----- mirL 18 9
----AGGTAGTAGATTGTATAG----- mirL 18 7
--GTGAGGTAGTAGATTGTATAG----- mirL 21 7
----AGGTAGTAGATTGTATAGT----- mirL 19 6
----AGGTAGTAGATTGTATAGTTGTG----- mirL 23 6
--GTGAGGTAGTAGATTGTATAGTT----- mirL 23 4
GAGTGAGGTAGTAGATTGTATA----- mirL 22 2
----GGTAGTAGATTGTATAGTTG----- mirL 20 2
-AGTGAGGTAGTAGATTGTATAGTT----- mirL 24 2
-AGTGAGGTAGTAGATTGTAT----- mirL 20 1
-AGTGAGGTAGTAGATTGTATAGT----- mirL 23 1
----GGTAGTAGATTGTATAGTTGT----- mirL 21 1
-AGTGAGGTAGTAGATTGTATAG----- mirL 22 1
-----CTATACAATCTATTGCCTTCCC----- mirR 22 2149
-----CTATACAATCTATTGCCTTCC----- mirR 21 560
-----CTATACAATCTATTGCCTTC----- mirR 20 250
-----AACTATACAATCTATTGCCTTC----- mirR 22 120
-----ACTATACAATCTATTGCCTTCC----- mirR 22 44
-----AACTATACAATCTATTGCCTTCC----- mirR 23 40
-----CTATACAATCTATTGCCTTCCCT----- mirR 23 36
-----CTATACAATCTATTGCCTT----- mirR 19 36
-----AACTATACAATCTATTGCC----- mirR 19 21
-----AACTATACAATCTATTGCCTT----- mirR 21 21
-----ACTATACAATCTATTGCCTTCCC----- mirR 23 17
-----TATACAATCTATTGCCTTCCC----- mirR 21 16
-----CTATACAATCTATTGCCT----- mirR 18 15
-----CTATACAATCTATTGCCTTCCCTG----- mirR 24 12
-----ACTATACAATCTATTGCCTTC----- mirR 21 9
-----AACTATACAATCTATTGC----- mirR 18 9
-----TATACAATCTATTGCCTTCCCT----- mirR 22 7
-----ACTATACAATCTATTGCC----- mirR 18 5
-----TATACAATCTATTGCCTTC----- mirR 19 4
-----TATACAATCTATTGCCTTCC----- mirR 20 3
-----ACTATACAATCTATTGCCTT----- mirR 20 3
-----AACTATACAATCTATTGCCTTCCC----- mirR 24 2
-----TAACTATACAATCTATTGCCTTC----- mirR 23 2
-----ATACAATCTATTGCCTTCCC----- mirR 20 2
-----TACAATCTATTGCCTTCCC----- mirR 19 2
-----ATACAATCTATTGCCTTCCCT----- mirR 21 1

```

```
-----AACTATACAATCTATTGCCT----- mirR 20 1
-----ATACAATCTATTGCCTTC----- mirR 18 1
-----TATACAATCTATTGCCTTCCCTG----- mirR 23 1
-----ACTATACAATCTATTGCCTTCCCT----- mirR 24 1
-----ATACAATCTATTGCCTTCC----- mirR 19 1
-----AGGAGTAGACTTGCTGCA--- morR 18 2
-----AGGAGTAGACTTGCTGCATTG morR 21 1
```

>mmu-mir-200a

```
AGCATACCTGGGCCCTGTGGGCATCTTACCGGACAGTGCTGGATTTCTGGCTTGACTCTAACACTGTCTGGTAACGATGTTCAAAGGTGACCCACCATTCGCC species len reads
AGCATACCTGGGCCCTGT----- morL 19 1
-----CATCTTACCGGACAGTGCTGGA----- mirL 22 379
-----CATCTTACCGGACAGTGCTGG----- mirL 21 192
-----CATCTTACCGGACAGTGCTGGAT----- mirL 23 140
-----CATCTTACCGGACAGTGC----- mirL 18 108
-----CATCTTACCGGACAGTGCTG----- mirL 20 59
-----ATCTTACCGGACAGTGCTGGAT----- mirL 22 5
-----ATCTTACCGGACAGTGCTGGA----- mirL 21 2
-----ATCTTACCGGACAGTGCTGGATTT----- mirL 24 1
-----TCTTACCGGACAGTGCTGGATT----- mirL 22 1
-----GCATCTTACCGGACAGTG----- mirL 18 1
-----TAACACTGTCTGGTAACGATGTT----- mirR 23 100773
-----TAACACTGTCTGGTAACGATGT----- mirR 22 84729
-----TAACACTGTCTGGTAACGATGTT----- mirR 24 55380
-----TAACACTGTCTGGTAACGA----- mirR 19 12258
-----TAACACTGTCTGGTAACGAT----- mirR 20 9631
-----TAACACTGTCTGGTAACGATG----- mirR 21 9399
-----AACACTGTCTGGTAACGATGTT----- mirR 23 5832
-----AACACTGTCTGGTAACGATGT----- mirR 21 5466
-----AACACTGTCTGGTAACGATGTT----- mirR 22 4714
-----TAACACTGTCTGGTAACG----- mirR 18 3375
-----AACACTGTCTGGTAACGATG----- mirR 20 583
-----AACACTGTCTGGTAACGAT----- mirR 19 550
-----AACACTGTCTGGTAACGA----- mirR 18 292
-----AACACTGTCTGGTAACGATGTTCA----- mirR 24 95
-----ACACTGTCTGGTAACGATGTT----- mirR 21 32
-----ACACTGTCTGGTAACGATGT----- mirR 20 13
-----CTAACACTGTCTGGTAACGATGTT----- mirR 25 13
-----CTAACACTGTCTGGTAACGATGT----- mirR 23 12
-----CTAACACTGTCTGGTAACGATGTT----- mirR 24 11
-----CACTGTCTGGTAACGATGT----- mirR 19 8
-----CTAACACTGTCTGGTAACGATG----- mirR 22 6
-----CACTGTCTGGTAACGATGTT----- mirR 20 5
-----CTAACACTGTCTGGTAACG----- mirR 19 3
-----ACACTGTCTGGTAACGATGTT----- mirR 22 3
-----ACACTGTCTGGTAACGAT----- mirR 18 3
```

```

-----TCTAACACTGTCTGGTAACGATGT----- mirR 24 2
-----CTAACACTGTCTGGTAACGAT----- mirR 21 2
-----ACACTGTCTGGTAACGATG----- mirR 19 2
-----CTAACACTGTCTGGTAAC----- mirR 18 2
-----ACACTGTCTGGTAACGATGTTCAA----- mirR 24 1
-----TCTAACACTGTCTGGTAACGATGTT----- mirR 25 1
-----AGGTGACCCACCATTTCGCC morR 19 1

```

>mmu-mir-181a-1

```

TGCCCTCACAGGTTGCTTCAGTGAACATTCAACGCTGTCGGTGAGTTTGGAAATTCAAATAAAAACCATCGACCGTTGATTGTACCTT species len reads
---CTCACAGGTTGCTTCAGTG----- morL 19 1
TGCCCTCACAGGTTGCTTCAGTG----- morL 22 1
-----AACATTCAACGCTGTCGGTGAGT----- mirL 23 77160
-----AACATTCAACGCTGTCGGT----- mirL 19 56963
-----AACATTCAACGCTGTCGGTGAGTT----- mirL 24 50287
-----AACATTCAACGCTGTCGGTGA----- mirL 21 48856
-----AACATTCAACGCTGTCGGTGAGTTT----- mirL 25 43825
-----ACATTCAACGCTGTCGGTGA----- mirL 20 277
-----ACATTCAACGCTGTCGGTGAGTTT----- mirL 24 205
-----ACATTCAACGCTGTCGGTGAGTT----- mirL 23 201
-----ACATTCAACGCTGTCGGTGAGT----- mirL 22 195
-----ACATTCAACGCTGTCGGTG----- mirL 19 173
-----GAACATTCAACGCTGTCGGTGAGTT----- mirL 25 19
-----CATTCAACGCTGTCGGTGAGTTT----- mirL 23 18
-----CATTCAACGCTGTCGGTGAGT----- mirL 21 17
-----ATTCAACGCTGTCGGTGAGTTT----- mirL 22 16
-----ATTCAACGCTGTCGGTGAGT----- mirL 20 12
-----CATTCAACGCTGTCGGTGA----- mirL 19 11
-----ATTCAACGCTGTCGGTGA----- mirL 18 9
-----CATTCAACGCTGTCGGTGAGTT----- mirL 22 8
-----GAACATTCAACGCTGTCGGTGAGT----- mirL 24 7
-----ATTCAACGCTGTCGGTGAG----- mirL 19 6
-----GAACATTCAACGCTGTCGGTGA----- mirL 22 6
-----CATTCAACGCTGTCGGTG----- mirL 18 6
-----ATTCAACGCTGTCGGTGAGTT----- mirL 21 4
-----GAACATTCAACGCTGTCGGTGAG----- mirL 23 3
-----GAACATTCAACGCTGTCGGTG----- mirL 21 2
-----TGAACATTCAACGCTGTCGGTGAG----- mirL 24 1
-----TGAACATTCAACGCTGTCGGTGA----- mirL 23 1
-----TGAACATTCAACGCTGTCGGTG----- mirL 22 1
-----GTGAACATTCAACGCTGTCGGTG----- mirL 23 1
-----GTGAACATTCAACGCTGTCGGTGA----- mirL 24 1
-----TTGGAATTCAAATAAAAACC----- loop 20 1
-----ACCATCGACCGTTGATTGTACC-- mirR 22 8138
-----ACCATCGACCGTTGATTGTAC-- mirR 21 2854
-----ACCATCGACCGTTGATTGTACCC- mirR 23 1316

```

```

-----ACCATCGACCGTTGATTGT----- mirR 19 621
-----ACCATCGACCGTTGATTGTA----- mirR 20 256
-----ACCATCGACCGTTGATTG----- mirR 18 109
-----ACCATCGACCGTTGATTGTACCCT mirR 24 24
-----AACCATCGACCGTTGATTGTAC--- mirR 22 24
-----AAACCATCGACCGTTGATTGTACC-- mirR 24 22
-----AAAACCATCGACCGTTGATTGTACC-- mirR 25 17
-----CCATCGACCGTTGATTGTACC-- mirR 21 11
-----AACCATCGACCGTTGATTGTACC-- mirR 23 9
-----CCATCGACCGTTGATTGTAC--- mirR 20 6
-----AACCATCGACCGTTGATTGTACCC- mirR 24 4
-----AAACCATCGACCGTTGATTGTACCC- mirR 25 4
-----AACCATCGACCGTTGATTGT----- mirR 20 3
-----AAACCATCGACCGTTGATT----- mirR 19 3
-----CATCGACCGTTGATTGTACC-- mirR 20 3
-----AAACCATCGACCGTTGATTGTAC--- mirR 23 2
-----AAAACCATCGACCGTTGATTGTA--- mirR 23 2
-----CCATCGACCGTTGATTGTACCC- mirR 22 2
-----AAACCATCGACCGTTGATTGT----- mirR 21 2
-----AAAACCATCGACCGTTGATTGTAC--- mirR 24 2
-----ATCGACCGTTGATTGTACCC- mirR 20 2
-----AAAACCATCGACCGTTGATTGTACCC- mirR 26 1
-----ATCGACCGTTGATTGTAC--- mirR 18 1
-----AAAACCATCGACCGTTGATT----- mirR 20 1
-----AAACCATCGACCGTTGATTGTA--- mirR 22 1
-----AACCATCGACCGTTGATTGTA--- mirR 21 1
-----ATCGACCGTTGATTGTACC-- mirR 19 1
-----AAAACCATCGACCGTTGATTG----- mirR 21 1
-----AACCATCGACCGTTGATTG----- mirR 19 1
-----CATCGACCGTTGATTGTAC--- mirR 19 1

```

>mmu-mir-30b

```

AGCCAAGTTTCAGTTCATGTAAACATCCTACACTCAGCTGTCATACATGCGTTGGCTGGGATGTGGATGTTTACGTACAG species len reads
AGCCAAGTTTCAGTTCAT----- morL 18 1
-----TGTA AACATCCTACACTCAGCT----- mirL 22 175665
-----TGTA AACATCCTACACTCAGC----- mirL 21 61879
-----GTA AACATCCTACACTCAGCT----- mirL 21 15802
-----TGTA AACATCCTACACTCAG----- mirL 20 9182
-----TGTA AACATCCTACACTCAGCTG----- mirL 23 9004
-----TGTA AACATCCTACACTCA----- mirL 19 5174
-----GTA AACATCCTACACTCAGC----- mirL 20 2261
-----GTA AACATCCTACACTCAGCTG----- mirL 22 1457
-----GTA AACATCCTACACTCAG----- mirL 19 844
-----GTA AACATCCTACACTCA----- mirL 18 476
-----ATGTA AACATCCTACACTCAGC----- mirL 22 73
-----AAACATCCTACACTCAGCT----- mirL 19 36

```

```

-----TAAACATCCTACACTCAGCT----- mirL 20 33
-----ATGTAAACATCCTACACTC----- mirL 19 16
-----ATGTAAACATCCTACACTCAG----- mirL 21 14
-----ATGTAAACATCCTACACTCAGCT----- mirL 23 13
-----ATGTAAACATCCTACACTCA----- mirL 20 9
-----AAACATCCTACACTCAGC----- mirL 18 8
-----TAAACATCCTACACTCAGC----- mirL 19 5
-----AAACATCCTACACTCAGCTG----- mirL 20 3
-----TAAACATCCTACACTCAG----- mirL 18 2
-----CATGTAAACATCCTACACTC----- mirL 20 2
-----TAAACATCCTACACTCAGCTG----- mirL 21 2
-----TCATGTAAACATCCTACACTCAGCT----- mirL 25 1
-----TAAACATCCTACACTCAGCTGT----- mirL 22 1
-----AAACATCCTACACTCAGCTGTC----- mirL 22 1
-----TCATGTAAACATCCTACACT----- mirL 20 1
-----AAACATCCTACACTCAGCTGT----- mirL 21 1
-----CTGGGATGTGGATGTTTACGTC-- mirR 22 103
-----CTGGGATGTGGATGTTTACGT--- mirR 21 99
-----CTGGGATGTGGATGTTTACGTCA- mirR 23 44
-----CTGGGATGTGGATGTTTAC----- mirR 19 42
-----TGGGATGTGGATGTTTACGTCA- mirR 22 20
-----CTGGGATGTGGATGTTTA----- mirR 18 15
-----CTGGGATGTGGATGTTTACGTCA- mirR 24 8
-----TGGGATGTGGATGTTTACGT--- mirR 20 5
-----GGGATGTGGATGTTTACGTCA- mirR 21 4
-----GCTGGGATGTGGATGTTTAC----- mirR 20 3
-----TGGGATGTGGATGTTTACGTC-- mirR 21 3
-----CTGGGATGTGGATGTTTACG--- mirR 20 2
-----TGGGATGTGGATGTTTACGTCA- mirR 23 2
-----GGGATGTGGATGTTTACG--- mirR 18 1
-----GGGATGTGGATGTTTACGTC-- mirR 20 1
-----TGGGATGTGGATGTTTAC----- mirR 18 1
-----GCTGGGATGTGGATGTTTACGT--- mirR 22 1
-----GGCTGGGATGTGGATGTTTA----- mirR 20 1
-----GCTGGGATGTGGATGTTTACGTC-- mirR 23 1
-----GCTGGGATGTGGATGTTTACGTCA- mirR 24 1
-----GGGATGTGGATGTTTACGTCA- mirR 22 1
-----GGCTGGGATGTGGATGTTTACGTC-- mirR 24 1
-----TGGGATGTGGATGTTTACG--- mirR 19 1

```

>mmu-mir-181a-2

```

GCCTTAAGAGGACTCCATGGAAACATCAACGCTGTCGGTGAGTTGGGATTCAAAAACAAAAAACCCAGCCGTTGACTGTACCTT species len reads
GCCTTAAGAGGACTCCAT----- morL 18 2
-----AACATTCACGCTGTCGGTGAGT----- mirL 23 77160
-----AACATTCACGCTGTCGGT----- mirL 19 56963
-----AACATTCACGCTGTCGGTGAGTT----- mirL 24 50287

```

```

-----AACATTCAACGCTGTCGGTGA----- mirL 21 48856
-----AACATTCAACGCTGTCGGTGAGTTT----- mirL 25 43825
-----ACATTCAACGCTGTCGGTGA----- mirL 20 277
-----ACATTCAACGCTGTCGGTGAGTT----- mirL 24 205
-----ACATTCAACGCTGTCGGTGAGTT----- mirL 23 201
-----ACATTCAACGCTGTCGGTGAGT----- mirL 22 195
-----ACATTCAACGCTGTCGGTG----- mirL 19 173
-----GAACATTCAACGCTGTCGGTGAGTT----- mirL 25 19
-----CATTCAACGCTGTCGGTGAGTT----- mirL 23 18
-----CATTCAACGCTGTCGGTGAGT----- mirL 21 17
-----ATTCAACGCTGTCGGTGAGTT----- mirL 22 16
-----ATTCAACGCTGTCGGTGAGT----- mirL 20 12
-----CATTCAACGCTGTCGGTGA----- mirL 19 11
-----ATTCAACGCTGTCGGTGA----- mirL 18 9
-----CATTCAACGCTGTCGGTGAGTT----- mirL 22 8
-----GAACATTCAACGCTGTCGGTGAGT----- mirL 24 7
-----ATTCAACGCTGTCGGTGAG----- mirL 19 6
-----CATTCAACGCTGTCGGTG----- mirL 18 6
-----GAACATTCAACGCTGTCGGTGA----- mirL 22 6
-----ATTCAACGCTGTCGGTGAGTT----- mirL 21 4
-----GAACATTCAACGCTGTCGGTGAG----- mirL 23 3
-----GAACATTCAACGCTGTCGGTG----- mirL 21 2
-----GGAACATTCAACGCTGTCGGTGA----- mirL 23 1
-----GGAACATTCAACGCTGTC----- mirL 18 1
-----GGAACATTCAACGCTGTCGGTGAGT----- mirL 25 1
-----GGAACATTCAACGCTGTCGGTGAG----- mirL 24 1
-----TGGAACATTCAACGCTGTCGGTGA----- mirL 24 1
-----ACCACCGACCGTTGACTGTACC-- mirR 22 275
-----ACCACCGACCGTTGACTGTAC--- mirR 21 208
-----ACCACCGACCGTTGACTGT----- mirR 19 92
-----ACCACCGACCGTTGACTGTA---- mirR 20 25
-----ACCACCGACCGTTGACTGTACCT- mirR 23 21
-----ACCACCGACCGTTGACTG----- mirR 18 13
-----AACCACCGACCGTTGACTGTAC--- mirR 22 8
-----ACCACCGACCGTTGACTGTACCTT mirR 24 3
-----AACCACCGACCGTTGACTGT----- mirR 20 3
-----AACCACCGACCGTTGACTGTACC-- mirR 23 2
-----ACCGACCGTTGACTGTAC--- mirR 18 1
-----AAAACCACCGACCGTTGACTGT---- mirR 22 1
-----AAACCACCGACCGTTGACTGTA--- mirR 22 1

>mmu-let-7a-2
TGTGACTGCATGTTCCAGGTTGAGGTAGTAGGTTGTATAGTTTAGAGTTACATCAAGGGAGATAACTGTACAGCCTCTAGCTTTCCTT species len reads
TGTGACTGCATGTTCCCA----- morL 18 1
-----TGAGGTAGTAGGTTGTATAGTT----- mirL 22 109141
-----TGAGGTAGTAGGTTGTATAG----- mirL 20 53451

```

```

-----TGAGGTAGTAGGTTGTATAGT----- mirL 21 51583
-----TGAGGTAGTAGGTTGTATAGTTT----- mirL 23 32024
-----TGAGGTAGTAGGTTGTATA----- mirL 19 14815
-----GAGGTAGTAGGTTGTATAGTT----- mirL 21 3598
-----GAGGTAGTAGGTTGTATAG----- mirL 19 1557
-----GAGGTAGTAGGTTGTATAGTTT----- mirL 22 1406
-----GAGGTAGTAGGTTGTATAGT----- mirL 20 1279
-----GAGGTAGTAGGTTGTATAGTTA----- mirL 23 478
-----TTGAGGTAGTAGGTTGTATAGTT----- mirL 23 43
-----TTGAGGTAGTAGGTTGTATAGT----- mirL 22 33
-----TTGAGGTAGTAGGTTGTATAG----- mirL 21 24
-----GGTAGTAGGTTGTATAGTT----- mirL 19 17
-----AGGTAGTAGGTTGTATAGTTT----- mirL 21 14
-----TTGAGGTAGTAGGTTGTATAGTTA----- mirL 25 10
-----TTGAGGTAGTAGGTTGTATA----- mirL 20 9
-----AGGTAGTAGGTTGTATAGTT----- mirL 20 9
-----GGTAGTAGGTTGTATAGTTT----- mirL 20 8
-----GGTAGTAGGTTGTATAGT----- mirL 18 8
-----GTTGAGGTAGTAGGTTGTATAG----- mirL 22 5
-----GTTGAGGTAGTAGGTTGTATAGTT----- mirL 24 5
-----AGGTAGTAGGTTGTATAG----- mirL 18 3
-----GGTTGAGGTAGTAGGTTGTATAGT----- mirL 24 3
-----AGGTAGTAGGTTGTATAGT----- mirL 19 3
-----AGGTAGTAGGTTGTATAGTTA----- mirL 22 3
-----GGTAGTAGGTTGTATAGTTTAG----- mirL 22 2
-----GGTAGTAGGTTGTATAGTTA----- mirL 21 1
-----GTTGAGGTAGTAGGTTGTATAGT----- mirL 23 1
-----GTTGAGGTAGTAGGTTGTATA----- mirL 21 1
-----TAGAGTTACATCAAGGGAGAT----- loop 21 3
-----TAGAGTTACATCAAGGGAGA----- loop 20 2
-----AGAGTTACATCAAGGGAGATA----- loop 21 1
-----TAGAGTTACATCAAGGGAGATAA----- loop 23 1
-----CTGTACAGCCTCCTAGCTTTCC-- mirR 22 238
-----CTGTACAGCCTCCTAGCTTTC-- mirR 21 57
-----CTGTACAGCCTCCTAGCTTT---- mirR 20 21
-----ACTGTACAGCCTCCTAGCTTTC-- mirR 22 17
-----CTGTACAGCCTCCTAGCTTTCCT- mirR 23 11
-----TGTACAGCCTCCTAGCTTTCC-- mirR 21 8
-----CTGTACAGCCTCCTAGCTT----- mirR 19 5
-----ACTGTACAGCCTCCTAGCTTT---- mirR 21 4
-----ACTGTACAGCCTCCTAGC----- mirR 18 3
-----CTGTACAGCCTCCTAGCTTTCCTT mirR 24 2
-----ACTGTACAGCCTCCTAGCTTTCC-- mirR 23 2
-----CTGTACAGCCTCCTAGCT----- mirR 18 2
-----TGTACAGCCTCCTAGCTTTCCT- mirR 22 2
-----TAACTGTACAGCCTCCTAGC----- mirR 20 1

```



```

-----ACTGTACAGCCTCCTAGCTT----- mirR 20 1
-----ACTGTACAGCCTCCTAGCT----- mirR 19 1
-----AACTGTACAGCCTCCTAGCTTTC--- mirR 23 1
-----TGTACAGCCTCCTAGCTTTC--- mirR 20 1

>mmu-let-7a-1
TTCTCTTCACTGTGGGATGAGGTAGTAGGTTGTATAGTTTTAGGGTCACACCCACCACTGGGAGATAACTATACAATCTACTGTCTTTCCCTAAGGTGATGGAAAAGTCTGCATTCATGGGGTC species len rea
TTCTCTTCACTGTGGGAT----- morL 18 2
TTCTCTTCACTGTGGGATGA----- morL 20 1
-----TGAGGTAGTAGGTTGTATAGTT----- mirL 22 109140
-----TGAGGTAGTAGGTTGTATAG----- mirL 20 53451
-----TGAGGTAGTAGGTTGTATAGT----- mirL 21 51583
-----TGAGGTAGTAGGTTGTATAGTTT----- mirL 23 32025
-----TGAGGTAGTAGGTTGTATA----- mirL 19 14815
-----GAGGTAGTAGGTTGTATAGTT----- mirL 21 3598
-----GAGGTAGTAGGTTGTATAG----- mirL 19 1554
-----GAGGTAGTAGGTTGTATAGTTT----- mirL 22 1406
-----GAGGTAGTAGGTTGTATAGT----- mirL 20 1280
-----GAGGTAGTAGGTTGTATAGTTT----- mirL 23 501
-----ATGAGGTAGTAGGTTGTATAGTT----- mirL 23 57
-----ATGAGGTAGTAGGTTGTAT----- mirL 19 34
-----ATGAGGTAGTAGGTTGTATAGT----- mirL 22 32
-----ATGAGGTAGTAGGTTGTATAG----- mirL 21 25
-----ATGAGGTAGTAGGTTGTATA----- mirL 20 23
-----GGTAGTAGGTTGTATAGTT----- mirL 19 17
-----AGGTAGTAGGTTGTATAGTTT----- mirL 21 14
-----AGGTAGTAGGTTGTATAGTT----- mirL 20 9
-----GGTAGTAGGTTGTATAGT----- mirL 18 8
-----GGTAGTAGGTTGTATAGTTT----- mirL 20 8
-----GGTAGTAGGTTGTATAGTTT----- mirL 21 5
-----AGGTAGTAGGTTGTATAG----- mirL 18 3
-----AGGTAGTAGGTTGTATAGT----- mirL 19 3
-----AGGTAGTAGGTTGTATAGTTT----- mirL 22 3
-----GATGAGGTAGTAGGTTGTATAGTT----- mirL 24 3
-----GATGAGGTAGTAGGTTGTA----- mirL 19 2
-----GGTAGTAGGTTGTATAGTTT----- mirL 22 2
-----GATGAGGTAGTAGGTTGTATAGT----- mirL 23 1
-----GATGAGGTAGTAGGTTGT----- mirL 18 1
-----GATGAGGTAGTAGGTTGTATA----- mirL 21 1
-----GGATGAGGTAGTAGGTTGTA----- mirL 20 1
-----TTAGGGTCACACCCACCACTGGGAGATAA----- loop 29 1
-----TTAGGGTCACACCCACCACTGGGAGA----- loop 26 1
-----CTATACAATCTACTGTCTTTCCCTA----- mirR 24 7
-----CTATACAATCTACTGTCTTTCCCTAA----- mirR 25 3
-----CTATACAATCTACTGTCTTTCCCTAAGGTGA----- mirR 30 2
-----CTATACAATCTACTGTCTTTCCCTAAGGT----- mirR 28 2

```

```

-----CTATACAATCTACTGTCTTTTCCCTAAG----- mirR 26 1
-----CTATACAATCTACTGTCTTTTCCCTAAG----- mirR 27 1
-----CTATACAATCTACTGTCTTTTCC----- mirR 22 1
-----CTAAGGTGATGGAAAAGTCTGCATTCATGGGGTC morR 34 1

```

>mmu-mir-204

```

ATGTGACTCGTGGACTTCCCTTTGTGCATCCTATGCCTGAGAATATATGAAGGAGGCTGGGAAGGCCAAAGGGACGTTCA species len reads
ATGTGACTCGTGGACTTC----- morL 18 2
-----TTCCCTTTGTGCATCCTATGCCT----- mirL 22 119065
-----TTCCCTTTGTGCATCCTATGC----- mirL 20 31083
-----TTCCCTTTGTGCATCCTATGCC----- mirL 21 28893
-----TTCCCTTTGTGCATCCTATGCCTG----- mirL 23 20483
-----TTCCCTTTGTGCATCCTATGCCTGA----- mirL 24 14906
-----TCCCTTTGTGCATCCTATGCCT----- mirL 21 7638
-----TCCCTTTGTGCATCCTATGCCTG----- mirL 22 2044
-----TCCCTTTGTGCATCCTATGCCTGA----- mirL 23 1859
-----TCCCTTTGTGCATCCTATGC----- mirL 19 1363
-----TCCCTTTGTGCATCCTATGCC----- mirL 20 1157
-----CTTCCCTTTGTGCATCCTATGCC----- mirL 22 26
-----CCCTTTGTGCATCCTATGCCT----- mirL 20 22
-----CCCTTTGTGCATCCTATGCCTGA----- mirL 22 10
-----CTTCCCTTTGTGCATCCTATGCCT----- mirL 23 9
-----CTTCCCTTTGTGCATCCTA----- mirL 18 9
-----CCCTTTGTGCATCCTATGCCTG----- mirL 21 7
-----CCTTTGTGCATCCTATGCCT----- mirL 19 6
-----CTTCCCTTTGTGCATCCTATGC----- mirL 21 6
-----CCCTTTGTGCATCCTATGCC----- mirL 19 5
-----CTTCCCTTTGTGCATCCTATGCCTGA----- mirL 25 3
-----CCCTTTGTGCATCCTATGC----- mirL 18 2
-----CCTTTGTGCATCCTATGCCTGA----- mirL 21 2
-----CCTTTGTGCATCCTATGCCTG----- mirL 20 2
-----GACTTCCCTTTGTGCATCCTATGCC----- mirL 24 1
-----CCTTTGTGCATCCTATGCC----- mirL 18 1
-----CCTGAGAATATATGAAGG----- loop 18 3
-----CTGAGAATATATGAAGGA----- loop 18 1
-----GAGAATATATGAAGGAGG----- loop 19 1
-----CTGAGAATATATGAAGGAGG----- loop 20 1
-----GCTGGGAAGGCCAAAGGGACG----- mirR 20 42
-----GCTGGGAAGGCCAAAGGGACGT----- mirR 21 40
-----GCTGGGAAGGCCAAAGGGAC----- mirR 19 24
-----GCTGGGAAGGCCAAAGGGA----- mirR 18 13
-----GCTGGGAAGGCCAAAGGGACGTT----- mirR 22 11
-----GCTGGGAAGGCCAAAGGGACGTT----- mirR 23 11
-----GGCTGGGAAGGCCAAAGGGACGTT----- mirR 24 6
-----GGCTGGGAAGGCCAAAGGGACG----- mirR 21 6
-----GGCTGGGAAGGCCAAAGGGAC----- mirR 20 4

```

```

-----GGCTGGGAAGGCAAAGGGA----- mirR 19 4
-----GGCTGGGAAGGCAAAGGGACGT--- mirR 22 2
-----GGCTGGGAAGGCAAAGGGACGTT-- mirR 23 2
-----GAGGCTGGGAAGGCAAAGG----- mirR 19 1
-----GGCTGGGAAGGCAAAGGGACGTTCA mirR 25 1

```

>mmu-mir-107

| ACTCGATAATTTTCTCTGTGCTTTACAGTTCCTTACAGTGTTCCTTGTGGCATGGAGTTCAAGCAGCATTGTACAGGGCTATCAAAGCACAGAGAGCTCGC   | species | len | reads  |
|---------------------------------------------------------------------------------------------------------|---------|-----|--------|
| ACTCGATAATTTTCTCTGTGCTTTACAGTTCCTTACAGTGTTCCTTGTGGCATGGAGTTCAAGCAGCATTGTACAGGGCTATCAAAGCACAGAGAGAGCTCGC | morL    | 25  | 1      |
| -----AGCTTCTTTACAGTGTTCCTT-----                                                                         | mirL    | 22  | 699    |
| -----AGCTTCTTTACAGTGTTCCTT-----                                                                         | mirL    | 21  | 482    |
| -----AGCTTCTTTACAGTGTTCCTT-----                                                                         | mirL    | 23  | 384    |
| -----CAGCTTCTTTACAGTGTTCCTT-----                                                                        | mirL    | 23  | 349    |
| -----AGCTTCTTTACAGTGTTCCTT-----                                                                         | mirL    | 20  | 262    |
| -----AGCTTCTTTACAGTGTTCCTT-----                                                                         | mirL    | 19  | 253    |
| -----CAGCTTCTTTACAGTGTTCCTT-----                                                                        | mirL    | 22  | 154    |
| -----CAGCTTCTTTACAGTGTTCCTT-----                                                                        | mirL    | 20  | 133    |
| -----CAGCTTCTTTACAGTGTTCCTT-----                                                                        | mirL    | 24  | 87     |
| -----CAGCTTCTTTACAGTGTTCCTT-----                                                                        | mirL    | 21  | 87     |
| -----TCAGCTTCTTTACAGTGTTCCTT-----                                                                       | mirL    | 22  | 11     |
| -----TCAGCTTCTTTACAGTGT-----                                                                            | mirL    | 18  | 1      |
| -----TCAGCTTCTTTACAGTGTTCCTT-----                                                                       | mirL    | 21  | 1      |
| -----TTCTTTACAGTGTTCCTTGT-----                                                                          | mirL    | 21  | 1      |
| -----GCTTCTTTACAGTGTTCCTTGT-----                                                                        | mirL    | 23  | 1      |
| -----AGCAGCATTGTACAGGGCTATC-----                                                                        | mirR    | 22  | 209708 |
| -----AGCAGCATTGTACAGGGCTATCA-----                                                                       | mirR    | 23  | 8710   |
| -----AGCAGCATTGTACAGGGCTATCAA-----                                                                      | mirR    | 24  | 3285   |
| -----CAGCATTGTACAGGGCTATC-----                                                                          | mirR    | 20  | 355    |
| -----AGCAGCATTGTACAGGGCTATCAA-----                                                                      | mirR    | 25  | 303    |
| -----GCAGCATTGTACAGGGCTATC-----                                                                         | mirR    | 21  | 88     |
| -----AAGCAGCATTGTACAGGGCTATC-----                                                                       | mirR    | 23  | 76     |
| -----CAGCATTGTACAGGGCTATCA-----                                                                         | mirR    | 21  | 66     |
| -----AGCATTGTACAGGGCTATC-----                                                                           | mirR    | 19  | 39     |
| -----GCAGCATTGTACAGGGCTATCA-----                                                                        | mirR    | 22  | 25     |
| -----CAGCATTGTACAGGGCTATCAA-----                                                                        | mirR    | 22  | 21     |
| -----AGCAGCATTGTACAGGGCTATCAAAG-----                                                                    | mirR    | 26  | 19     |
| -----AGCAGCATTGTACAGGGCTATCAAAGCA-----                                                                  | mirR    | 28  | 6      |
| -----AGCAGCATTGTACAGGGCTATCAAAGC-----                                                                   | mirR    | 27  | 5      |
| -----GCAGCATTGTACAGGGCTATCAA-----                                                                       | mirR    | 23  | 3      |
| -----AAGCAGCATTGTACAGGGCTATCA-----                                                                      | mirR    | 24  | 3      |
| -----AGCATTGTACAGGGCTATCA-----                                                                          | mirR    | 20  | 3      |
| -----AGCATTGTACAGGGCTATCAA-----                                                                         | mirR    | 21  | 2      |
| -----CAAGCAGCATTGTACAGGGCTATC-----                                                                      | mirR    | 24  | 2      |
| -----CAGCATTGTACAGGGCTATCAAAGCACA-----                                                                  | mirR    | 28  | 1      |
| -----TCAAAGCACAGAGAGAGCTCGC                                                                             | morR    | 20  | 1      |

```
>mmu-mir-103-2
CAGAGCTGTCTTCGTGCTTTTCAGCTTCTTTACAGTGCTGCCTTGTAGCATTTCAGGTCAAGCAGCATTGTACAGGGCTATGAAAGAACC species len reads
--GAGCTGTCTTCGTGCTTTTC----- morL 19 1
--GAGCTGTCTTCGTGCTTTCA----- morL 20 1
--GAGCTGTCTTCGTGCTTT----- morL 18 1
CAGAGCTGTCTTCGTGCTTTTC----- morL 21 1
-----AGCTTCTTTACAGTGCTGCCTTGTA----- mirL 25 199
-----AGCTTCTTTACAGTGCTGCCTTGT----- mirL 24 181
-----AGCTTCTTTACAGTGCTGCCT----- mirL 21 179
-----AGCTTCTTTACAGTGCTGCC----- mirL 20 108
-----AGCTTCTTTACAGTGCTGCCTTG----- mirL 23 88
-----CAGCTTCTTTACAGTGCTGCCT----- mirL 22 18
-----CAGCTTCTTTACAGTGCT----- mirL 18 13
-----CAGCTTCTTTACAGTGCTGCC----- mirL 21 7
-----CAGCTTCTTTACAGTGCTG----- mirL 19 4
-----CAGCTTCTTTACAGTGCTGC----- mirL 20 2
-----GCTTCTTTACAGTGCTGCC----- mirL 19 1
-----AGCAGCATTGTACAGGGCTATGA----- mirR 23 170678
-----AGCAGCATTGTACAGGGCTATG----- mirR 22 42902
-----AGCAGCATTGTACAGGGCTATGAA----- mirR 24 4508
-----CAGCATTGTACAGGGCTATGA----- mirR 21 719
-----AGCAGCATTGTACAGGGCTATGAAA----- mirR 25 521
-----AGCAGCATTGTACAGGGCT----- mirR 19 236
-----CAGCATTGTACAGGGCTATG----- mirR 20 164
-----GCAGCATTGTACAGGGCTATGA----- mirR 22 147
-----CAGCATTGTACAGGGCTATGAA----- mirR 22 77
-----AGCATTGTACAGGGCTATGA----- mirR 20 72
-----AGCAGCATTGTACAGGGCTATGAAAGAACC mirR 30 65
-----AGCAGCATTGTACAGGGCTATGAAAG----- mirR 26 65
-----GCAGCATTGTACAGGGCTATG----- mirR 21 34
-----AAGCAGCATTGTACAGGGCTATGA----- mirR 24 23
-----AGCATTGTACAGGGCTATG----- mirR 19 23
-----GCAGCATTGTACAGGGCTATGAA----- mirR 23 14
-----AAGCAGCATTGTACAGGGCTATG----- mirR 23 14
-----CAGCATTGTACAGGGCTATGAAA----- mirR 23 7
-----AGCATTGTACAGGGCTATGAA----- mirR 21 3
-----AAGCAGCATTGTACAGGGCTAT----- mirR 22 2
-----AGCATTGTACAGGGCTATGAAA----- mirR 22 1
-----GCAGCATTGTACAGGGCTAT----- mirR 20 1
-----GCAGCATTGTACAGGGCTATGAAA----- mirR 24 1

>mmu-mir-103-1
TGGAAGTTTTCTTACTGCCCTCGGCTTCTTTACAGTGCTGCCTTGTTCATATGGATCAAGCAGCATTGTACAGGGCTATGAAGGCATTGAGACTTGTTCCTC species len reads
-----TTTTCTTACTGCCCTCGGC----- morL 19 1
-----AGTTTTCTTACTGCCCTC----- morL 18 1
-----GTTTTCTTACTGCCCTCG----- morL 18 1
```

```

TGGAAGTTTTCTTACTGCC----- morL 19 1
----AGTTTTCTTACTGCCCTCG----- morL 19 1
-----GGCTTCTTTACAGTGCTGCCTTGTT----- mirL 25 227
-----GGCTTCTTTACAGTGCTGCCTTGT----- mirL 24 142
-----GGCTTCTTTACAGTGCTGCCT----- mirL 21 86
-----GGCTTCTTTACAGTGCTGCCTTG----- mirL 23 75
-----GGCTTCTTTACAGTGCTGCC----- mirL 20 64
-----GCTTCTTTACAGTGCTGCC----- mirL 19 1
-----AGCAGCATTGTACAGGGCTATGA----- mirR 23 170678
-----AGCAGCATTGTACAGGGCTATG----- mirR 22 42902
-----AGCAGCATTGTACAGGGCTATGAA----- mirR 24 4508
-----CAGCATTGTACAGGGCTATGA----- mirR 21 719
-----AGCAGCATTGTACAGGGCTATGAAG----- mirR 25 590
-----AGCAGCATTGTACAGGGCT----- mirR 19 236
-----CAGCATTGTACAGGGCTATG----- mirR 20 164
-----GCAGCATTGTACAGGGCTATGA----- mirR 22 147
-----AGCAGCATTGTACAGGGCTATGAAG----- mirR 26 84
-----CAGCATTGTACAGGGCTATGAA----- mirR 22 77
-----AGCATTGTACAGGGCTATGA----- mirR 20 72
-----GCAGCATTGTACAGGGCTATG----- mirR 21 34
-----AAGCAGCATTGTACAGGGCTATGA----- mirR 24 23
-----AGCAGCATTGTACAGGGCTATGAAGGC----- mirR 27 23
-----AGCATTGTACAGGGCTATG----- mirR 19 23
-----GCAGCATTGTACAGGGCTATGAA----- mirR 23 14
-----AAGCAGCATTGTACAGGGCTATG----- mirR 23 14
-----CAGCATTGTACAGGGCTATGAAG----- mirR 23 6
-----AGCATTGTACAGGGCTATGAA----- mirR 21 3
-----AAGCAGCATTGTACAGGGCTAT----- mirR 22 2
-----CAGCATTGTACAGGGCTATGAAG----- mirR 24 1
-----GCAGCATTGTACAGGGCTAT----- mirR 20 1
-----GCAGCATTGTACAGGGCTATGAAG----- mirR 24 1
-----CATTGAGACTTGTCTTC morR 18 1

```

>mmu-mir-338

```

CTGCACAGGCCGTCCTCCCCAACAAATATCCTGGTGCTGAGTGGGTGCACAGTGACTCCAGCATCAGTGATTTTGTGAAGAGGGCAGCTGCCAGCCTC species len reads
CTGCACAGGCCGTCCTCCCC----- morL 20 2
-TGCACAGGCCGTCCTCCCC----- morL 19 1
-----AACAAATATCCTGGTGCTGAGT----- mirL 21 5025
-----AACAAATATCCTGGTGCTGAG----- mirL 20 3286
-----AACAAATATCCTGGTGCTGAGTG----- mirL 22 2001
-----AACAAATATCCTGGTGCTGAGTGG----- mirL 23 1082
-----AACAAATATCCTGGTGCTGA----- mirL 19 856
-----CCAACAATATCCTGGTGCTGAG----- mirL 22 319
-----CCAACAATATCCTGGTGCTGA----- mirL 21 297
-----CCAACAATATCCTGGTGCTGAGT----- mirL 23 220
-----CCAACAATATCCTGGTGC----- mirL 18 118

```

```

-----CCACAATATCCTGGTGCTG----- mirL 20 118
-----CCAACAATATCCTGGTGC----- mirL 19 55
-----CAACAATATCCTGGTGCTGA----- mirL 20 55
-----CCAACAATATCCTGGTGCTG----- mirL 21 50
-----CCAACAATATCCTGGTGCT----- mirL 20 44
-----CCAACAATATCCTGGTGCTGA----- mirL 22 41
-----CAACAATATCCTGGTGCTGAG----- mirL 21 20
-----CAACAATATCCTGGTGCTG----- mirL 19 14
-----CCAACAATATCCTGGTGCTGAG----- mirL 23 11
-----CAACAATATCCTGGTGCTGAGT----- mirL 22 9
-----CAACAATATCCTGGTGCTGAGTG----- mirL 23 4
-----ACAATATCCTGGTGCTGAG----- mirL 19 2
-----CAATATCCTGGTGCTGAGTG----- mirL 20 1
-----ACAATATCCTGGTGCTGAGT----- mirL 20 1
-----ACAATATCCTGGTGCTGAGTG----- mirL 21 1
-----ACAATATCCTGGTGCTGA----- mirL 18 1
-----CAATATCCTGGTGCTGAG----- mirL 18 1
-----TCCAGCATCAGTGATTTGTTG----- mirR 22 83316
-----TCCAGCATCAGTGATTTGTTGA----- mirR 23 62804
-----TCCAGCATCAGTGATTTGTT----- mirR 21 19622
-----CCAGCATCAGTGATTTGTTGA----- mirR 22 8788
-----TCCAGCATCAGTGATTTGTT----- mirR 20 8603
-----CCAGCATCAGTGATTTGTTG----- mirR 21 5189
-----TCCAGCATCAGTGATTTGTT----- mirR 19 5041
-----TCCAGCATCAGTGATTTGTTGAA----- mirR 24 4078
-----TCCAGCATCAGTGATTTT----- mirR 18 2815
-----CCAGCATCAGTGATTTGTT----- mirR 20 1041
-----CCAGCATCAGTGATTTGTTGAA----- mirR 23 865
-----CCAGCATCAGTGATTTGTT----- mirR 19 470
-----CCAGCATCAGTGATTTTG----- mirR 18 230
-----AGCATCAGTGATTTGTTGAAGA----- mirR 23 49
-----CCAGCATCAGTGATTTGTTGAAG----- mirR 24 30
-----AGCATCAGTGATTTGTTGA----- mirR 20 23
-----AGCATCAGTGATTTGTTG----- mirR 19 21
-----CAGCATCAGTGATTTGTTGA----- mirR 21 18
-----AGCATCAGTGATTTGTTGAA----- mirR 21 14
-----CTCCAGCATCAGTGATTTGTT----- mirR 22 14
-----AGCATCAGTGATTTGTTGAAGAG----- mirR 24 9
-----CAGCATCAGTGATTTGTTG----- mirR 20 9
-----AGCATCAGTGATTTGTTGAAG----- mirR 22 8
-----CTCCAGCATCAGTGATTTGTTGA----- mirR 24 6
-----CTCCAGCATCAGTGATTTGTT----- mirR 21 6
-----CTCCAGCATCAGTGATTTGTTG----- mirR 23 6
-----CAGCATCAGTGATTTGTTGAA----- mirR 22 5
-----CAGCATCAGTGATTTGTT----- mirR 19 4
-----CTCCAGCATCAGTGATTTGTTGAA----- mirR 25 3

```

```

-----ACTCCAGCATCAGTGATTTTGTG----- mirR 24 3
-----AGCATCAGTGATTTTGT----- mirR 18 2
-----GACTCCAGCATCAGTGATTTTGTGA----- mirR 26 1
-----GACTCCAGCATCAGTGATT----- mirR 19 1
-----CAGCATCAGTGATTTTGTGAAG----- mirR 23 1
-----ACTCCAGCATCAGTGATTTTGT----- mirR 23 1
-----GACTCCAGCATCAGTGATTTTGT----- mirR 24 1
-----CTCCAGCATCAGTGATTT----- mirR 19 1
-----GACTCCAGCATCAGTGATTTTGT----- mirR 25 1
-----AGAGGGCAGCTGCCAGCCTC morR 20 1

```

>mmu-mir-23a

```

GGGGTTCCCTGGGGATGGGATTTGATGCCAGTCACAAATCACATTGCCAGGGATTTCCAACCTGTGCTCTGCCT species len reads
GGGGTTCCCTGGGGATGGGATTT----- mirL 22 30
GGGGTTCCCTGGGGATGGGATT----- mirL 21 9
GGGGTTCCCTGGGGATGGGATTTGA----- mirL 24 2
---GTTCCCTGGGGATGGGATT----- mirL 18 1
GGGGTTCCCTGGGGATGGGA----- mirL 19 1
GGGGTTCCCTGGGGATGGGATTTG----- mirL 23 1
-----ATCACATTGCCAGGGATTTCCA----- mirR 22 69489
-----ATCACATTGCCAGGGATTTCC----- mirR 21 63363
-----ATCACATTGCCAGGGATTTCC----- mirR 20 33206
-----ATCACATTGCCAGGGATTT----- mirR 19 19756
-----ATCACATTGCCAGGGATTTCCA----- mirR 23 9454
-----ATCACATTGCCAGGGATTTCCAAC----- mirR 24 7314
-----AATCACATTGCCAGGGATTTCC----- mirR 22 1249
-----AATCACATTGCCAGGGATTTCC----- mirR 21 347
-----ATCACATTGCCAGGGATTTCCAAC----- mirR 25 293
-----AATCACATTGCCAGGGATTT----- mirR 20 276
-----AATCACATTGCCAGGGATTTCCA----- mirR 23 199
-----TCACATTGCCAGGGATTTCCAAC----- mirR 23 128
-----TCACATTGCCAGGGATTTCC----- mirR 19 123
-----TCACATTGCCAGGGATTTCCA----- mirR 21 119
-----ACATTGCCAGGGATTTCCA----- mirR 19 112
-----TCACATTGCCAGGGATTTCC----- mirR 20 101
-----CACATTGCCAGGGATTTCCA----- mirR 20 71
-----ACATTGCCAGGGATTTCC----- mirR 18 68
-----CACATTGCCAGGGATTTCC----- mirR 19 64
-----CACATTGCCAGGGATTTCC----- mirR 18 61
-----TCACATTGCCAGGGATTT----- mirR 18 61
-----AATCACATTGCCAGGGATTTCCAAC----- mirR 25 46
-----AATCACATTGCCAGGGATTTCCA----- mirR 24 42
-----ACATTGCCAGGGATTTCCA----- mirR 20 38
-----CACATTGCCAGGGATTTCCA----- mirR 21 24
-----TCACATTGCCAGGGATTTCCA----- mirR 22 23
-----CACATTGCCAGGGATTTCCAAC----- mirR 22 16

```

```
-----ACATTGCCAGGGATTCCAAC----- mirR 21 11
-----TCACATTGCCAGGGATTCCAAC----- mirR 24 7
-----AATCACATTGCCAGGGATT----- mirR 19 2
-----AAATCACATTGCCAGGGATTTC----- mirR 22 1
-----AAATCACATTGCCAGGGATTTC----- mirR 23 1
-----CTGACCTGTGCTCTGCCT morR 19 1
```

>mmu-mir-191

```
GGCAACGGAATCCCAAAAGCAGCTGTTGTCTCCAGAGCATTCCAGCTGCACTTGGATTTCGTTCCCTGC species len reads
--CAACGGAATCCCAAAAGCAGCT----- mirL 22 120876
--CAACGGAATCCCAAAAGCAGC----- mirL 21 38686
--CAACGGAATCCCAAAAGCAGCTG----- mirL 23 17113
--CAACGGAATCCCAAAAGC----- mirL 18 14689
--CAACGGAATCCCAAAAGCAG----- mirL 20 10887
---AACGGAATCCCAAAAGCAGCT----- mirL 21 749
---AACGGAATCCCAAAAGCAGC----- mirL 20 369
---AACGGAATCCCAAAAGCAGCTG----- mirL 22 286
---AACGGAATCCCAAAAGCAGCTGT----- mirL 23 185
---AACGGAATCCCAAAAGCAG----- mirL 19 74
-GCAACGGAATCCCAAAAGCAGC----- mirL 22 45
---ACGGAATCCCAAAAGCAGCT----- mirL 20 20
-GCAACGGAATCCCAAAAGC----- mirL 19 11
-GCAACGGAATCCCAAAAGCAGCT----- mirL 23 10
---ACGGAATCCCAAAAGCAGCTG----- mirL 21 8
---ACGGAATCCCAAAAGCAGC----- mirL 19 5
-GCAACGGAATCCCAAAAGCA----- mirL 20 5
---CGGAATCCCAAAAGCAGCT----- mirL 19 5
---ACGGAATCCCAAAAGCAG----- mirL 18 5
GGCAACGGAATCCCAAAAGC----- mirL 20 4
-GCAACGGAATCCCAAAAGCAG----- mirL 21 3
---ACGGAATCCCAAAAGCAGCTGT----- mirL 22 3
GGCAACGGAATCCCAAAAGCAGC----- mirL 23 2
GGCAACGGAATCCCAAAAGCAGCTG----- mirL 25 1
-----CTGCACTTGGATTTCGTTCCC--- mirR 21 223
-----GCTGCACTTGGATTTCGTTCCC--- mirR 22 206
-----CTGCACTTGGATTTCGTTCC--- mirR 20 77
-----GCTGCACTTGGATTTCGTTCC--- mirR 21 75
-----CTGCACTTGGATTTCGTTCCCT-- mirR 22 50
-----GCTGCACTTGGATTTCGTTCC--- mirR 20 44
-----CTGCACTTGGATTTCGTTCC--- mirR 19 25
-----GCTGCACTTGGATTTCGTTCCCT-- mirR 23 15
-----GCTGCACTTGGATTTCGTT--- mirR 19 13
-----GCTGCACTTGGATTTCGT----- mirR 18 9
-----CTGCACTTGGATTTCGTTCCCTG- mirR 23 7
-----CTGCACTTGGATTTCGTTCCCTGC mirR 24 5
-----TGCACTTGGATTTCGTTCCC--- mirR 20 4
```



```
-----TGCACTTGGATTTCGTTCCCTGC mirR 23 3
-----TGCACTTGGATTTCGTTTC---- mirR 18 2
-----GCTGCACTTGGATTTCGTTCCCTG- mirR 24 2
-----CTGCACTTGGATTTCGTT----- mirR 18 2
-----AGCTGCACTTGGATTTCGTTCC--- mirR 22 2
-----AGCTGCACTTGGATTTCG----- mirR 18 1
-----TGCACTTGGATTTCGTTCCCT-- mirR 21 1
-----AGCTGCACTTGGATTTCGTT----- mirR 20 1
-----AGCTGCACTTGGATTTCGTTCCC-- mirR 23 1
```

>mmu-mir-23b

```
CTCACCTGCTCTGGCTGCTTGGGTTCTGGCATGCTGATTTGTGACTTGAGATTAATAATCACATTGCCAGGGATTACCACGCA species len reads
CTCACCTGCTCTGGCTGCTTG----- morL 21 1
-----GGGTTCTGGCATGCTGATTT----- mirL 21 22
-----GGGTTCTGGCATGCTGATT----- mirL 20 11
-----TGGGTTCTGGCATGCTGATTT----- mirL 22 6
-----GGGTTCTGGCATGCTGAT----- mirL 19 4
-----GGGTTCTGGCATGCTGATTTG----- mirL 22 4
-----TGGGTTCTGGCATGCTGATTTG----- mirL 23 4
-----TGGGTTCTGGCATGCTGATT----- mirL 21 2
-----GGGTTCTGGCATGCTGATTTGT----- mirL 23 2
-----GTTCTGGCATGCTGATTTG----- mirL 20 1
-----TGGGTTCTGGCATGCTG----- mirL 18 1
-----TGGGTTCTGGCATGCTGA----- mirL 19 1
-----ATCACATTGCCAGGGATTACCAC--- mirR 23 79349
-----ATCACATTGCCAGGGATTAC----- mirR 20 42659
-----ATCACATTGCCAGGGATTACC----- mirR 21 34943
-----ATCACATTGCCAGGGATTACCACG-- mirR 24 16029
-----ATCACATTGCCAGGGATTACCA--- mirR 22 15923
-----ATCACATTGCCAGGGATTA----- mirR 19 6672
-----ATCACATTGCCAGGGATTACCACGC- mirR 25 3237
-----TCACATTGCCAGGGATTACCAC--- mirR 22 1795
-----TCACATTGCCAGGGATTACC----- mirR 20 756
-----TCACATTGCCAGGGATTAC----- mirR 19 678
-----TCACATTGCCAGGGATTACCACG-- mirR 23 554
-----AATCACATTGCCAGGGATTACC----- mirR 22 277
-----TCACATTGCCAGGGATTACCA--- mirR 21 260
-----TCACATTGCCAGGGATTACCACGC- mirR 24 249
-----CACATTGCCAGGGATTACCACG-- mirR 22 128
-----AATCACATTGCCAGGGATTAC----- mirR 21 112
-----AATCACATTGCCAGGGATTACCAC--- mirR 24 100
-----ACATTGCCAGGGATTACCACG-- mirR 21 99
-----TCACATTGCCAGGGATTA----- mirR 18 76
-----CACATTGCCAGGGATTACCAC--- mirR 21 69
-----CACATTGCCAGGGATTACC----- mirR 19 62
-----CACATTGCCAGGGATTAC----- mirR 18 54
```

```

-----CACATTGCCAGGGATTACCA---- mirR 20 53
-----ACATTGCCAGGGATTACCAC--- mirR 20 48
-----ACATTGCCAGGGATTACCA---- mirR 19 40
-----ACATTGCCAGGGATTACC---- mirR 18 38
-----AATCACATTGCCAGGGATTA---- mirR 20 37
-----AATCACATTGCCAGGGATTACCA--- mirR 23 35
-----ACATTGCCAGGGATTACCACGC- mirR 22 25
-----CACATTGCCAGGGATTACCACGC- mirR 23 19
-----AATCACATTGCCAGGGATTACCACG-- mirR 25 16
-----CACATTGCCAGGGATTACCACGCA mirR 24 5
-----AATCACATTGCCAGGGATTACCACGC- mirR 26 4
-----AAATCACATTGCCAGGGATTACC---- mirR 23 2
-----ACATTGCCAGGGATTACCACGCA mirR 23 1
-----AAAATCACATTGCCAGGGATTAC---- mirR 23 1

```

>mmu-mir-136

```

TGTTGGATGAGCCCTCGGAGGACTCCATTTGTTTTGATGATGGATTCTTAAGCTCCATCATCGTCTCAAATGAGTCTTCAGAG species len reads
--TTGGATGAGCCCTCGGAGGA----- morL 20 1
TGTTGGATGAGCCCTCGGA----- morL 19 1
--TGGATGAGCCCTCGGAGGAC----- morL 20 1
-----ACTCCATTTGTTTTGATGATGG----- mirL 22 45925
-----ACTCCATTTGTTTTGATGATGGA----- mirL 23 27338
-----ACTCCATTTGTTTTGATGAT----- mirL 20 18095
-----ACTCCATTTGTTTTGATGATG----- mirL 21 17417
-----ACTCCATTTGTTTTGATG----- mirL 18 11454
-----GGACTCCATTTGTTTTGATGAT----- mirL 22 1241
-----GGACTCCATTTGTTTTGATGA----- mirL 21 704
-----AGGACTCCATTTGTTTTGATGA----- mirL 22 252
-----AGGACTCCATTTGTTTTGATGAT----- mirL 23 216
-----GGACTCCATTTGTTTTGATG----- mirL 20 204
-----CTCCATTTGTTTTGATGATGGA----- mirL 22 192
-----CTCCATTTGTTTTGATGATGG----- mirL 21 192
-----GACTCCATTTGTTTTGATGAT----- mirL 21 128
-----CTCCATTTGTTTTGATGAT----- mirL 19 127
-----GGACTCCATTTGTTTTGATGATG----- mirL 23 110
-----GGACTCCATTTGTTTTGAT----- mirL 19 94
-----CTCCATTTGTTTTGATGATG----- mirL 20 89
-----CTCCATTTGTTTTGATGATGGAT----- mirL 23 60
-----AGGACTCCATTTGTTTTGA----- mirL 19 50
-----GACTCCATTTGTTTTGATGATG----- mirL 22 49
-----AGGACTCCATTTGTTTTGATG----- mirL 21 46
-----AGGACTCCATTTGTTTTG----- mirL 18 44
-----GACTCCATTTGTTTTGATGA----- mirL 20 38
-----GACTCCATTTGTTTTGATGATGG----- mirL 23 29
-----GACTCCATTTGTTTTGATGATGGA----- mirL 24 18
-----CCATTTGTTTTGATGATGGA----- mirL 20 12

```

```
-----TCCATTTGTTTTGATGATGG----- mirL 20 9
-----TCCATTTGTTTTGATGAT----- mirL 18 8
-----CCATTTGTTTTGATGATG----- mirL 18 8
-----TCCATTTGTTTTGATGATGGA----- mirL 21 6
-----TCCATTTGTTTTGATGATG----- mirL 19 6
-----CCATTTGTTTTGATGATGG----- mirL 19 4
-----CCATTTGTTTTGATGATGGAT----- mirL 21 4
-----TCCATTTGTTTTGATGATGGAT----- mirL 22 3
-----CCATTTGTTTTGATGATGGATTC----- mirL 23 2
-----CATCATCGTCTCAAATGAGTCT----- mirR 22 31920
-----ATCATCGTCTCAAATGAGTCT----- mirR 21 14203
-----TCATCGTCTCAAATGAGTCTT----- mirR 21 6165
-----CATCGTCTCAAATGAGTCTTC--- mirR 21 3910
-----ATCATCGTCTCAAATGAGTCTTC--- mirR 23 3132
-----CATCATCGTCTCAAATGAGTC----- mirR 21 2971
-----TCATCGTCTCAAATGAGTCTTC--- mirR 22 2939
-----CATCGTCTCAAATGAGTCTTCA--- mirR 22 2239
-----CATCATCGTCTCAAATGAGTCTT--- mirR 23 1906
-----ATCATCGTCTCAAATGAGTCTT--- mirR 22 1686
-----CATCGTCTCAAATGAGTCTT----- mirR 20 1321
-----TCATCGTCTCAAATGAGTC----- mirR 19 1242
-----CATCATCGTCTCAAATGAGTCTTC--- mirR 24 1156
-----ATCATCGTCTCAAATGAGTC----- mirR 20 1123
-----TCATCGTCTCAAATGAGTCT----- mirR 20 1016
-----ATCATCGTCTCAAATGAGT----- mirR 19 488
-----CATCATCGTCTCAAATGAGT----- mirR 20 488
-----CATCGTCTCAAATGAGTCT----- mirR 19 468
-----CATCATCGTCTCAAATGAG----- mirR 19 372
-----TCATCGTCTCAAATGAGTCTTCA--- mirR 23 325
-----CATCATCGTCTCAAATGA----- mirR 18 322
-----TCATCGTCTCAAATGAGT----- mirR 18 261
-----CATCGTCTCAAATGAGTC----- mirR 18 244
-----CATCGTCTCAAATGAGTCTTCAG-- mirR 23 94
-----ATCATCGTCTCAAATGAGTCTTCA--- mirR 24 70
-----ATCATCGTCTCAAATGAG----- mirR 18 54
-----TCATCGTCTCAAATGAGTCTTCAG-- mirR 24 25
-----CCATCATCGTCTCAAATGAGTC----- mirR 22 8
-----CATCGTCTCAAATGAGTCTTCAGAG mirR 25 3
-----CTCCATCATCGTCTCAAATGAGTCTT--- mirR 26 1
-----CTCCATCATCGTCTCAAAT----- mirR 19 1
-----CTCCATCATCGTCTCAAATGAGTC----- mirR 24 1

>mmu-let-7i
CCGGCTCCCACACCATGGCCCTGGCTGAGGTAGTAGTTTGTGCTGTTGGTCGGGTTGTGACATTGCCCGCTGTGGAGATAACTGCGCAAGCTACTGCCTTGCTAGTGCTGGTGATGCTCAGCGCC species len r
-----CCCACACCATGGCCCTGGC----- morL 19 1
CCGGCTCCCACACCATGGCCCTGGC----- morL 25 1
```

|                                     |               |
|-------------------------------------|---------------|
| -----TGAGGTAGTAGTTTGTGCTGTTG-----   | mirL 23 52024 |
| -----TGAGGTAGTAGTTTGTGCTGTT-----    | mirL 22 43913 |
| -----TGAGGTAGTAGTTTGTGC-----        | mirL 18 38885 |
| -----TGAGGTAGTAGTTTGTGCTGT-----     | mirL 21 33524 |
| -----TGAGGTAGTAGTTTGTGCTG-----      | mirL 20 22958 |
| -----GAGGTAGTAGTTTGTGCTGTTG-----    | mirL 22 1955  |
| -----GAGGTAGTAGTTTGTGCTGTT-----     | mirL 21 1464  |
| -----GAGGTAGTAGTTTGTGCTGT-----      | mirL 20 943   |
| -----GAGGTAGTAGTTTGTGCTG-----       | mirL 19 732   |
| -----GAGGTAGTAGTTTGTGCT-----        | mirL 18 211   |
| -----CTGAGGTAGTAGTTTGTGC-----       | mirL 19 115   |
| -----CTGAGGTAGTAGTTTGTGCTG-----     | mirL 21 55    |
| -----CTGAGGTAGTAGTTTGTGCTGT-----    | mirL 22 27    |
| -----GGTAGTAGTTTGTGCTGTTG-----      | mirL 20 19    |
| -----CTGAGGTAGTAGTTTGTGCTGTTG-----  | mirL 24 13    |
| -----GGTAGTAGTTTGTGCTGTT-----       | mirL 19 12    |
| -----AGGTAGTAGTTTGTGCTGTT-----      | mirL 20 11    |
| -----CTGAGGTAGTAGTTTGTGCT-----      | mirL 20 11    |
| -----GGTAGTAGTTTGTGCTGT-----        | mirL 18 11    |
| -----AGGTAGTAGTTTGTGCTGT-----       | mirL 19 10    |
| -----AGGTAGTAGTTTGTGCTGTTG-----     | mirL 21 9     |
| -----GCTGAGGTAGTAGTTTGTGC-----      | mirL 20 5     |
| -----GGCTGAGGTAGTAGTTTGTGC-----     | mirL 21 5     |
| -----AGGTAGTAGTTTGTGCTGTTGG-----    | mirL 22 4     |
| -----AGGTAGTAGTTTGTGCTG-----        | mirL 18 3     |
| -----GCTGAGGTAGTAGTTTGTGCTGT-----   | mirL 23 1     |
| -----GCTGAGGTAGTAGTTTGTGCT-----     | mirL 21 1     |
| -----GGTAGTAGTTTGTGCTGTTGGT-----    | mirL 22 1     |
| -----GCTGAGGTAGTAGTTTGTGCTG-----    | mirL 22 1     |
| -----GCTGAGGTAGTAGTTTGTGCTGTTG----- | mirL 25 1     |
| -----CTGCGCAAGCTACTGCCTTGCT-----    | mirR 22 4184  |
| -----CTGCGCAAGCTACTGCCTTGC-----     | mirR 21 850   |
| -----CTGCGCAAGCTACTGCCTTG-----      | mirR 20 716   |
| -----CTGCGCAAGCTACTGCCTT-----       | mirR 19 562   |
| -----CTGCGCAAGCTACTGCCT-----        | mirR 18 266   |
| -----CTGCGCAAGCTACTGCCTTGCTA-----   | mirR 23 255   |
| -----CTGCGCAAGCTACTGCCTTGCTAG-----  | mirR 24 93    |
| -----TGCGCAAGCTACTGCCTTGCT-----     | mirR 21 60    |
| -----TGCGCAAGCTACTGCCTTGCTA-----    | mirR 22 12    |
| -----TGCGCAAGCTACTGCCTTGC-----      | mirR 20 12    |
| -----GCGCAAGCTACTGCCTTGCT-----      | mirR 20 7     |
| -----TGCGCAAGCTACTGCCTTG-----       | mirR 19 4     |
| -----TGCGCAAGCTACTGCCTT-----        | mirR 18 4     |
| -----TGCGCAAGCTACTGCCTTGCTAGT-----  | mirR 24 3     |
| -----ACTGCGCAAGCTACTGCCTTGCT-----   | mirR 22 3     |
| -----TGCGCAAGCTACTGCCTTGCTAG-----   | mirR 23 2     |

```

-----ACTGCGCAAGCTACTGCCT----- mirR 19 1
-----GCGCAAGCTACTGCCTTG----- mirR 18 1
-----GCGCAAGCTACTGCCTTGCTA----- mirR 21 1
-----TAGTGCTGGTGATGCTCAGCGCC morR 23 2
-----GCTGGTGATGCTCAGCGCC morR 19 1
-----CTAGTGCTGGTGATGCTC----- morR 18 1

```

>mmu-mir-143

```

TGAGGTGCAGTGCTGCATCTCTGGTCAGTTGGGAGTCTGAGATGAAGCACTGTAGCTCAGGAAGGGAGAAGATGTC species len reads
---GGTGCAGTGCTGCATCTCTGG----- mirL 21 40
---GGTGCAGTGCTGCATCTCTGGTC----- mirL 23 8
---GGTGCAGTGCTGCATCTCTGGT----- mirL 22 4
---GGTGCAGTGCTGCATCTCTG----- mirL 20 3
---GGTGCAGTGCTGCATCTCTGGTCA----- mirL 24 2
---AGGTGCAGTGCTGCATCTCTGG----- mirL 22 2
TGAGGTGCAGTGCTGCATC----- mirL 19 1
-----TGAGATGAAGCACTGTAGCTCA----- mirR 22 85537
-----TGAGATGAAGCACTGTAGCTC----- mirR 21 37919
-----TGAGATGAAGCACTGTAGC----- mirR 19 21689
-----TGAGATGAAGCACTGTAGCTCAG----- mirR 23 13853
-----TGAGATGAAGCACTGTAGCT----- mirR 20 12704
-----GAGATGAAGCACTGTAGCTCA----- mirR 21 4384
-----TGAGATGAAGCACTGTAG----- mirR 18 4300
-----TGAGATGAAGCACTGTAGCTCAGG----- mirR 24 2097
-----GAGATGAAGCACTGTAGCTC----- mirR 20 1818
-----GAGATGAAGCACTGTAGCTCAG----- mirR 22 971
-----GAGATGAAGCACTGTAGCT----- mirR 19 701
-----GAGATGAAGCACTGTAGC----- mirR 18 606
-----GAGATGAAGCACTGTAGCTCAGG----- mirR 23 227
-----CTGAGATGAAGCACTGTAGCTC----- mirR 22 133
-----CTGAGATGAAGCACTGTAGCTCA----- mirR 23 56
-----CTGAGATGAAGCACTGTAGCT----- mirR 21 31
-----CTGAGATGAAGCACTGTAGC----- mirR 20 24
-----CTGAGATGAAGCACTGTAGCTCAG----- mirR 24 12
-----CTGAGATGAAGCACTGTA----- mirR 18 12
-----CTGAGATGAAGCACTGTAG----- mirR 19 11
-----GATGAAGCACTGTAGCTCA----- mirR 19 9
-----GAGATGAAGCACTGTAGCTCAGGA----- mirR 24 9
-----GATGAAGCACTGTAGCTCAG----- mirR 20 7
-----GATGAAGCACTGTAGCTC----- mirR 18 5
-----AGATGAAGCACTGTAGCTC----- mirR 19 5
-----AGATGAAGCACTGTAGCTCAG----- mirR 21 3
-----GTCTGAGATGAAGCACTGT----- mirR 19 2
-----GATGAAGCACTGTAGCTCAGGAA----- mirR 23 2
-----AGATGAAGCACTGTAGCT----- mirR 18 2
-----GATGAAGCACTGTAGCTCAGG----- mirR 21 2

```

```
-----TCTGAGATGAAGCACTGTAGCTC----- mirR 23 1
-----TCTGAGATGAAGCACTGTAG----- mirR 20 1
-----AGATGAAGCACTGTAGCTCA----- mirR 20 1
-----AGATGAAGCACTGTAGCTCAGG----- mirR 22 1
-----TCAGGAAGGGAGAAGATG----- morR 18 2
-----TCAGGAAGGGAGAAGATGTC morR 20 1
-----TCAGGAAGGGAGAAGATGT- morR 19 1
```

>mmu-mir-495

```
CTCAGCCGTGGTACCTGAAAAGAAGTTGCCCATGTTATTTTTCGCTTTTATTTGTGACGAAACAAACATGGTGCACTTCTTTTTTCGATATCAAATCTC species len reads
--CAGCCGTGGTACCTGAAA----- morL 19 1
CTCAGCCGTGGTACCTGAAA----- morL 20 1
-----GAAGTTGCCCATGTTATTTTTTC----- mirL 22 72
-----GAAGTTGCCCATGTTATTTTT----- mirL 21 30
-----GAAGTTGCCCATGTTATTTTTTCG----- mirL 23 18
-----GAAGTTGCCCATGTTATTTTTTCG----- mirL 24 10
-----GAAGTTGCCCATGTTATTT----- mirL 19 6
-----AAACAAACATGGTGCACTTCTT----- mirR 22 99036
-----AAACAAACATGGTGCACTTCTTT----- mirR 23 19318
-----AAACAAACATGGTGCACTTCT----- mirR 21 15304
-----AAACAAACATGGTGCACTTC----- mirR 20 12733
-----AACAAACATGGTGCACTTCTTT----- mirR 22 11175
-----AAACAAACATGGTGCACTT----- mirR 19 7799
-----AACAAACATGGTGCACTTCTT----- mirR 21 7044
-----AACAAACATGGTGCACTTC----- mirR 19 3630
-----AACAAACATGGTGCACT----- mirR 18 2203
-----AACAAACATGGTGCACTTCT----- mirR 20 1426
-----AACAAACATGGTGCACTTCTTTT----- mirR 24 1239
-----AACAAACATGGTGCACTTCTTTT----- mirR 23 1236
-----AACAAACATGGTGCACTT----- mirR 18 1090
-----ACAAACATGGTGCACTTCTTT----- mirR 21 654
-----ACAAACATGGTGCACTTCTTTT----- mirR 22 570
-----ACAAACATGGTGCACTTCTT----- mirR 20 345
-----ACAAACATGGTGCACTTC----- mirR 18 224
-----AACAAACATGGTGCACTTCTTTTTC----- mirR 25 185
-----ACAAACATGGTGCACTTCT----- mirR 19 140
-----ACAAACATGGTGCACTTCTTTTTC----- mirR 24 78
-----ACAAACATGGTGCACTTCTTTT----- mirR 23 47
-----CAAACATGGTGCACTTCTTTT----- mirR 21 29
-----GAAACAAACATGGTGCACTTCTT----- mirR 23 28
-----CAAACATGGTGCACTTCTT----- mirR 19 26
-----CAAACATGGTGCACTTCTTTTTC----- mirR 23 20
-----CAAACATGGTGCACTTCTTT----- mirR 20 14
-----CAAACATGGTGCACTTCTTTT----- mirR 22 8
-----CAAACATGGTGCACTTCT----- mirR 18 7
-----GAAACAAACATGGTGCACTTC----- mirR 21 5
```

```

-----CGAAACAAACATGGTGCACCTTC----- mirR 22 3
-----GAAACAAACATGGTGCACCTCTTTT----- mirR 25 2
-----GAAACAAACATGGTGCACCTCT----- mirR 22 2
-----ACGAAACAAACATGGTGCACCT----- mirR 22 1
-----GAAACAAACATGGTGCACCT----- mirR 20 1
-----ACGAAACAAACATGGTGCACCTTC----- mirR 23 1
-----CGAAACAAACATGGTGCACCTCTTT----- mirR 25 1
-----CTTTTTCGATATCAAATC----- morR 18 1
-----TTTTTCGATATCAAATCTC morR 18 1

```

>mmu-mir-337

```

GAGAAGTTGGGGGTGGGAACGGCGTCATGCAGGAGTTGATTGCACAGCCATTCAGCTCCTATATGATGCCTTTCTTC species len reads
GAGAAGTTGGGGGTGGGA----- morL 19 2
-AGAAGTTGGGGGTGGGA----- morL 18 1
--GAAGTTGGGGGTGGGAA----- morL 18 1
-----CGGCGTCATGCAGGAGTTGAT----- mirL 21 1933
-----CGGCGTCATGCAGGAGTTGATT----- mirL 22 1904
-----CGGCGTCATGCAGGAGTTG----- mirL 19 927
-----CGGCGTCATGCAGGAGTTGA----- mirL 20 654
-----CGGCGTCATGCAGGAGTT----- mirL 18 366
-----GAACGGCGTCATGCAGGAGTTG----- mirL 22 220
-----AACGGCGTCATGCAGGAGTTGA----- mirL 22 176
-----AACGGCGTCATGCAGGAGTTG----- mirL 21 165
-----GAACGGCGTCATGCAGGAGTTGA----- mirL 23 119
-----GAACGGCGTCATGCAGGAGTT----- mirL 21 49
-----GGCGTCATGCAGGAGTTGATT----- mirL 21 31
-----GGCGTCATGCAGGAGTTGAT----- mirL 20 29
-----AACGGCGTCATGCAGGAGTT----- mirL 20 21
-----ACGGCGTCATGCAGGAGTTGA----- mirL 21 20
-----ACGGCGTCATGCAGGAGTTG----- mirL 20 19
-----AACGGCGTCATGCAGGAGTTGAT----- mirL 23 19
-----ACGGCGTCATGCAGGAGTTGAT----- mirL 22 19
-----GGCGTCATGCAGGAGTTGATTGC----- mirL 23 16
-----GAACGGCGTCATGCAGGAGT----- mirL 20 15
-----GAACGGCGTCATGCAGGAGTTGAT----- mirL 24 12
-----GGCGTCATGCAGGAGTTG----- mirL 18 8
-----AACGGCGTCATGCAGGAGT----- mirL 19 7
-----GGCGTCATGCAGGAGTTGATTGCAC----- mirL 25 4
-----ACGGCGTCATGCAGGAGTT----- mirL 19 4
-----ACGGCGTCATGCAGGAGTTGATTG----- mirL 24 2
-----TCAGCTCCTATATGATGCCTTTC----- mirR 23 67281
-----TCAGCTCCTATATGATGCCTTT----- mirR 22 35846
-----TCAGCTCCTATATGATGCC----- mirR 19 10212
-----TCAGCTCCTATATGATGC----- mirR 18 7628
-----TTCAGCTCCTATATGATGCCT----- mirR 21 6843
-----TCAGCTCCTATATGATGCCT----- mirR 21 5232

```

```

-----CAGCTCCTATATGATGCCTTT---- mirR 21 3237
-----TTCAGCTCCTATATGATGCCTT---- mirR 22 3221
-----TCAGCTCCTATATGATGCCT---- mirR 20 3178
-----TTCAGCTCCTATATGATGCC----- mirR 20 1485
-----TTCAGCTCCTATATGATGCCTTTC--- mirR 24 977
-----TTCAGCTCCTATATGATGCCTTT---- mirR 23 899
-----TTCAGCTCCTATATGATGC----- mirR 19 692
-----AGCTCCTATATGATGCCTTTC--- mirR 21 654
-----CAGCTCCTATATGATGCCTTTC--- mirR 22 442
-----AGCTCCTATATGATGCCTTT---- mirR 20 372
-----AGCTCCTATATGATGCCTTTCT-- mirR 22 371
-----CAGCTCCTATATGATGCC----- mirR 18 317
-----TCAGCTCCTATATGATGCCTTTCT-- mirR 24 281
-----CAGCTCCTATATGATGCCTT---- mirR 20 143
-----CAGCTCCTATATGATGCCT---- mirR 19 123
-----TTCAGCTCCTATATGATG----- mirR 18 71
-----AGCTCCTATATGATGCCTTTCTTC mirR 24 60
-----AGCTCCTATATGATGCCTT---- mirR 19 42
-----AGCTCCTATATGATGCCT---- mirR 18 33
-----AGCTCCTATATGATGCCTTTCTT- mirR 23 19
-----GTCCTATATGATGCCTTT---- mirR 19 18
-----GTCCTATATGATGCCTTTC--- mirR 20 9
-----CAGCTCCTATATGATGCCTTTCT-- mirR 23 7
-----ATTCAGCTCCTATATGAT----- mirR 18 3
-----GTCCTATATGATGCCTT---- mirR 18 2
-----ATTCAGCTCCTATATGATGCCT---- mirR 22 2
-----CATTAGCTCCTATATGATGC----- mirR 21 1
-----ATTCAGCTCCTATATGATG----- mirR 19 1
-----CAGCTCCTATATGATGCCTTTCTTC mirR 25 1
-----ATTCAGCTCCTATATGATGCCTT---- mirR 23 1

```

>mmu-mir-100

```

CAAACCCGTAGATCCGAACCTGTGCTGATTCTGCACACAAGCTTGTGTCTATAGGTATGTGTCTGTTAGGCGATC species len reads
--AACCCGTAGATCCGAACCTGTGCT----- mirL 23 70290
--AACCCGTAGATCCGAACCTGT----- mirL 21 54564
--AACCCGTAGATCCGAACCTGTG----- mirL 22 16535
--AACCCGTAGATCCGAACCT----- mirL 18 8469
--AACCCGTAGATCCGAACCTG----- mirL 20 2829
---ACCCGTAGATCCGAACCTGTG----- mirL 21 474
---ACCCGTAGATCCGAACCTGTGCT----- mirL 22 438
---ACCCGTAGATCCGAACCTGT----- mirL 20 263
-AAACCCGTAGATCCGAACCTGT----- mirL 22 125
---ACCCGTAGATCCGAACCTG----- mirL 19 35
-AAACCCGTAGATCCGAACCT----- mirL 19 20
---CCCGTAGATCCGAACCTGTG----- mirL 20 19
---CCCGTAGATCCGAACCTGT----- mirL 19 18

```



```

-AAACCCGTAGATCCGAACCTGTG----- mirL 23 9
---ACCCGTAGATCCGAACCT----- mirL 18 9
-AAACCCGTAGATCCGAAC----- mirL 18 8
----CCC GTAGATCCGAACCTGTGTC----- mirL 21 8
-----CCGTAGATCCGAACCTGTG----- mirL 19 7
-----CCGTAGATCCGAACCTGT----- mirL 18 5
-AAACCCGTAGATCCGAACCTGTGTC----- mirL 24 4
CAAACCCGTAGATCCGAACCTGTGTC----- mirL 25 2
CAAACCCGTAGATCCGAACCTGT----- mirL 23 2
----CCGTAGATCCGAACCTGTGTC----- mirL 20 2
----CCC GTAGATCCGAACCTG----- mirL 18 1
-----CAAGCTTGTGTCTATAGGTAT----- mirR 21 377
-----CAAGCTTGTGTCTATAGGTATG----- mirR 22 87
-----CAAGCTTGTGTCTATAGGTATGT----- mirR 23 64
-----ACAAGCTTGTGTCTATAGGTAT----- mirR 22 59
-----CAAGCTTGTGTCTATAGGT----- mirR 19 20
-----CAAGCTTGTGTCTATAGGTA----- mirR 20 16
-----AAGCTTGTGTCTATAGGTATGT----- mirR 22 11
-----ACAAGCTTGTGTCTATAGG----- mirR 19 8
-----ACAAGCTTGTGTCTATAGGT----- mirR 20 7
-----CAAGCTTGTGTCTATAGG----- mirR 18 5
-----AAGCTTGTGTCTATAGGTATG----- mirR 21 4
-----CAAGCTTGTGTCTATAGGTATGTG----- mirR 24 3
-----ACAAGCTTGTGTCTATAGGTATG----- mirR 23 2
-----AAGCTTGTGTCTATAGGTAT----- mirR 20 2
-----AGCTTGTGTCTATAGGTAT----- mirR 19 2
-----ACAAGCTTGTGTCTATAG----- mirR 18 2
-----ACAAGCTTGTGTCTATAGGTATGT----- mirR 24 1
-----CACAAAGCTTGTGTCTATA----- mirR 18 1
-----ACAAGCTTGTGTCTATAGGTA----- mirR 21 1
-----ATGTGTCTGTTAGGCGATC morR 19 1

>mmu-mir-376b
TCTTTGGTATTTAAAAGGTGGATATTCCTTCTATGGTTACGTGCTTCCCTGGATAATCATAGAGGAACATCCACTTTTTTC species len reads
TCTTTGGTATTTAAAAGGTG----- morL 20 2
-----GTGGATATTCCTTCTATGGTTAC----- mirL 23 6751
-----GTGGATATTCCTTCTATGGTTA----- mirL 22 5479
-----GTGGATATTCCTTCTATGGTT----- mirL 21 2853
-----GTGGATATTCCTTCTATGG----- mirL 19 1717
-----GTGGATATTCCTTCTATGGT----- mirL 20 840
-----TGGATATTCCTTCTATGGTTA----- mirL 21 516
-----TGGATATTCCTTCTATGGTTAC----- mirL 22 177
-----TGGATATTCCTTCTATGGTT----- mirL 20 90
-----GGTGGATATTCCTTCTATGGTTAC----- mirL 24 81
-----TGGATATTCCTTCTATGG----- mirL 18 75
-----GGTGGATATTCCTTCTATGGTT----- mirL 22 63

```

```

-----GGTGGATATTCCTTCTATGGTTA----- mirL 23 52
-----GGATATTCCTTCTATGGTTA----- mirL 20 37
-----GGTGGATATTCCTTCTATGG----- mirL 20 36
-----TGGATATTCCTTCTATGGT----- mirL 19 36
-----GGTGGATATTCCTTCTATGGT----- mirL 21 27
-----GGATATTCCTTCTATGGTTAC----- mirL 21 9
-----GGATATTCCTTCTATGGTT----- mirL 19 5
-----AAGGTGGATATTCCTTCTATGGT----- mirL 23 4
-----GGATATTCCTTCTATGGT----- mirL 18 2
-----AAGGTGGATATTCCTTCTATGGTT----- mirL 24 2
-----GATATTCCTTCTATGGTT----- mirL 18 2
-----GATATTCCTTCTATGGTTA----- mirL 19 1
-----AGGTGGATATTCCTTCTATGGT----- mirL 22 1
-----GGATATTCCTTCTATGGTTACG----- mirL 22 1
-----ATCATAGAGGAACATCCACTT----- mirR 21 122009
-----ATCATAGAGGAACATCCACTTT----- mirR 22 7868
-----ATCATAGAGGAACATCCACT----- mirR 20 2903
-----ATCATAGAGGAACATCCAC----- mirR 19 1822
-----CATAGAGGAACATCCACTT----- mirR 19 362
-----ATCATAGAGGAACATCCACTTTT----- mirR 23 238
-----ATCATAGAGGAACATCCA----- mirR 18 238
-----AATCATAGAGGAACATCCACTT----- mirR 22 181
-----TCATAGAGGAACATCCACTT----- mirR 20 98
-----TCATAGAGGAACATCCACTTT----- mirR 21 43
-----ATAGAGGAACATCCACTT----- mirR 18 29
-----CATAGAGGAACATCCACTTT----- mirR 20 26
-----TCATAGAGGAACATCCACTTTT----- mirR 22 17
-----AATCATAGAGGAACATCCACT----- mirR 21 16
-----ATCATAGAGGAACATCCACTTTTTTC mirR 25 13
-----CATAGAGGAACATCCACT----- mirR 18 11
-----TCATAGAGGAACATCCACT----- mirR 19 7
-----AATCATAGAGGAACATCCAC----- mirR 20 6
-----TAATCATAGAGGAACATCCACT----- mirR 22 5
-----AATCATAGAGGAACATCCACTTT----- mirR 23 4
-----TCATAGAGGAACATCCACTTTTT----- mirR 23 3
-----TCATAGAGGAACATCCAC----- mirR 18 3
-----TAATCATAGAGGAACATCC----- mirR 19 3
-----ATAGAGGAACATCCACTTT----- mirR 19 3
-----CATAGAGGAACATCCACTTTTTTC mirR 23 2
-----AATCATAGAGGAACATCCA----- mirR 19 2
-----ATAATCATAGAGGAACATCCACTT----- mirR 24 2
-----CATAGAGGAACATCCACTTTT----- mirR 21 2
-----TAATCATAGAGGAACATCCAC----- mirR 21 1
-----ATAATCATAGAGGAACATCCA----- mirR 21 1
-----TAATCATAGAGGAACATCCACTT----- mirR 23 1
-----ATAATCATAGAGGAACATCC----- mirR 20 1

```

```
-----AATCATAGAGGAACATCC----- mirR 18 1
-----TCATAGAGGAACATCCACTTTTTTC mirR 24 1
-----ATAGAGGAACATCCACTTTTTT- mirR 21 1
```

>mmu-mir-135a-2

```
CCAAGATAAATTCAGTCTAGTGCTTTATGGCTTTTTATTCCTATGTGATCGTAATAAAGTCTCATGTAGGGATGGAAGCCATGAAATA species len reads
CCAAGATAAATTCAGTCTAGTGCTTT----- morL 25 1
-----TATGGCTTTTTATTCCTATGT----- mirL 21 72173
-----TATGGCTTTTTATTCCTATGTGA----- mirL 23 29870
-----TATGGCTTTTTATTCCTATGTG----- mirL 22 22705
-----TATGGCTTTTTATTCCTATG----- mirL 20 10119
-----TATGGCTTTTTATTCCTAT----- mirL 19 3957
-----ATGGCTTTTTATTCCTATGT----- mirL 20 1885
-----ATGGCTTTTTATTCCTATGTGA----- mirL 22 1150
-----ATGGCTTTTTATTCCTATGTG----- mirL 21 908
-----ATGGCTTTTTATTCCTATG----- mirL 19 333
-----ATGGCTTTTTATTCCTAT----- mirL 18 91
-----TTATGGCTTTTTATTCCTATGT----- mirL 22 24
-----GGCTTTTTATTCCTATGTGA----- mirL 20 6
-----TGGCTTTTTATTCCTATGT----- mirL 19 6
-----GGCTTTTTATTCCTATGT----- mirL 18 4
-----TTATGGCTTTTTATTCCTATGTG----- mirL 23 4
-----TGGCTTTTTATTCCTATG----- mirL 18 3
-----TTATGGCTTTTTATTCCTATGTGAT----- mirL 25 2
-----TGGCTTTTTATTCCTATGTGA----- mirL 21 2
-----TTATGGCTTTTTATTC----- mirL 18 1
-----TTATGGCTTTTTATTCCTAT----- mirL 20 1
-----TGGCTTTTTATTCCTATGTGAT----- mirL 22 1
-----CTTTATGGCTTTTTATTC----- mirL 18 1
-----CTTTATGGCTTTTTATTCCTATGTGA----- mirL 26 1
-----GGCTTTTTATTCCTATGTG----- mirL 19 1
-----CTTTATGGCTTTTTATTCCTATGT----- mirL 24 1
-----TTATGGCTTTTTATTCCTATGTGA----- mirL 24 1
-----CGTAATAAAGTCTCATGT----- loop 18 1
-----TGTAGGGATGGAAGCCATGAA--- mirR 21 140
-----TGTAGGGATGGAAGCCATGA--- mirR 20 126
-----TGTAGGGATGGAAGCCATG----- mirR 19 62
-----ATGTAGGGATGGAAGCCATGAA--- mirR 22 51
-----TGTAGGGATGGAAGCCATGAAA-- mirR 22 41
-----ATGTAGGGATGGAAGCCATGA--- mirR 21 34
-----GTAGGGATGGAAGCCATGA--- mirR 19 15
-----TGTAGGGATGGAAGCCAT----- mirR 18 13
-----GTAGGGATGGAAGCCATGAA--- mirR 20 9
-----ATGTAGGGATGGAAGCCATG----- mirR 20 6
-----GTAGGGATGGAAGCCATGAAA-- mirR 21 4
-----ATGTAGGGATGGAAGCCATGAAA-- mirR 23 3
```

C:\Documents and Settings\hong\Desktop\Hippocampus-AGO-IP.txt

```
-----ATGTAGGGATGGAAGCCAT----- mirR 19 3
-----ATGTAGGGATGGAAGCCA----- mirR 18 2
-----TGTAGGGATGGAAGCCATGAAAT- mirR 23 2
-----GTAGGGATGGAAGCCATG----- mirR 18 2
-----TGTAGGGATGGAAGCCATGAAATA mirR 24 1
-----GTAGGGATGGAAGCCATGAAATA mirR 23 1
```

>mmu-mir-135a-1

```
CCCAGGCCTCACTGTTCTCTATGGCTTTTTATTTCCTATGTGATTCTATTGCTCGCTCATATAGGGATTGGAGCCGTGGCGTACGGTGAGGATAAGCC species len reads
CCCAGGCCTCACTGTTCTC----- morL 19 1
-----TATGGCTTTTTATTTCCTATGT----- mirL 21 72173
-----TATGGCTTTTTATTTCCTATGTGA----- mirL 23 29870
-----TATGGCTTTTTATTTCCTATGTG----- mirL 22 22704
-----TATGGCTTTTTATTTCCTATG----- mirL 20 10129
-----TATGGCTTTTTATTTCCTAT----- mirL 19 3958
-----ATGGCTTTTTATTTCCTATGT----- mirL 20 1885
-----ATGGCTTTTTATTTCCTATGTGA----- mirL 22 1150
-----ATGGCTTTTTATTTCCTATGTG----- mirL 21 908
-----ATGGCTTTTTATTTCCTATG----- mirL 19 333
-----ATGGCTTTTTATTTCCTAT----- mirL 18 91
-----CTATGGCTTTTTATTTCCTATGT----- mirL 22 7
-----GGCTTTTTATTTCCTATGTGA----- mirL 20 6
-----TGGCTTTTTATTTCCTATGT----- mirL 19 6
-----GGCTTTTTATTTCCTATGT----- mirL 18 4
-----TGGCTTTTTATTTCCTATG----- mirL 18 3
-----TGGCTTTTTATTTCCTATGTGA----- mirL 21 2
-----GGCTTTTTATTTCCTATGTG----- mirL 19 1
-----CTATGGCTTTTTATTTCCTATGTG----- mirL 23 1
-----TGGCTTTTTATTTCCTATGTGAT----- mirL 22 1
-----TATAGGGATTGGAGCCGTGGC----- mirR 21 16
-----TATAGGGATTGGAGCCGTGG----- mirR 20 8
-----TATAGGGATTGGAGCCGTGGCG----- mirR 22 8
-----TATAGGGATTGGAGCCGTG----- mirR 19 5
-----ATATAGGGATTGGAGCCGTGGC----- mirR 22 5
-----ATATAGGGATTGGAGCCGTG----- mirR 20 5
-----ATAGGGATTGGAGCCGTGGCG----- mirR 21 4
-----TATAGGGATTGGAGCCGTGGCGT----- mirR 23 2
-----ATATAGGGATTGGAGCCGTGG----- mirR 21 2
-----ATAGGGATTGGAGCCGTGGC----- mirR 20 2
-----ATAGGGATTGGAGCCGTGGCGTA----- mirR 23 1
-----TATAGGGATTGGAGCCGTGGCGTA----- mirR 24 1
-----ATATAGGGATTGGAGCCGT----- mirR 19 1
-----GCGTACGGTGAGGATAAGCC morR 20 1
```

>mmu-mir-127

```
GCTGAAGCTCAGAGGGCTCTGATTCCAGAAAGATCATCGGATCCGTCTGAGCTTGGCTGGTC species len reads
```

```
---GAAGCTCAGAGGGCTCTGATT----- mirL 21 1558
-CTGAAGCTCAGAGGGCTCTGATT----- mirL 23 1408
---GAAGCTCAGAGGGCTCTGATTC----- mirL 22 1308
-CTGAAGCTCAGAGGGCTCTGATTC----- mirL 24 1086
-CTGAAGCTCAGAGGGCTCTGAT----- mirL 22 843
-CTGAAGCTCAGAGGGCTCTG----- mirL 20 772
-CTGAAGCTCAGAGGGCTCTGA----- mirL 21 352
---GAAGCTCAGAGGGCTCTGA----- mirL 19 195
---GAAGCTCAGAGGGCTCTG----- mirL 18 189
---GAAGCTCAGAGGGCTCTGAT----- mirL 20 182
--TGAAGCTCAGAGGGCTCTGATTC----- mirL 23 62
GCTGAAGCTCAGAGGGCTCTGAT----- mirL 23 42
--TGAAGCTCAGAGGGCTCTGATT----- mirL 22 36
----AAGCTCAGAGGGCTCTGATT----- mirL 20 35
GCTGAAGCTCAGAGGGCTC----- mirL 19 22
GCTGAAGCTCAGAGGGCTCTG----- mirL 21 19
GCTGAAGCTCAGAGGGCTCTGATTC----- mirL 25 9
--TGAAGCTCAGAGGGCTCTGAT----- mirL 21 9
GCTGAAGCTCAGAGGGCTCT----- mirL 20 8
----AAGCTCAGAGGGCTCTGATTC----- mirL 21 6
--TGAAGCTCAGAGGGCTCTG----- mirL 19 6
----AAGCTCAGAGGGCTCTGATTC----- mirL 22 5
--TGAAGCTCAGAGGGCTCTGATTC----- mirL 24 3
----AAGCTCAGAGGGCTCTGA----- mirL 18 2
---AAGCTCAGAGGGCTCTGAT----- mirL 19 2
----AGCTCAGAGGGCTCTGATT----- mirL 19 1
-----GCTCAGAGGGCTCTGATT----- mirL 18 1
-----TCGGATCCGTCTGAGCTTGGCT---- mirR 22 50448
-----TCGGATCCGTCTGAGCTTGGC----- mirR 21 37699
-----TCGGATCCGTCTGAGCTTG----- mirR 19 12274
-----TCGGATCCGTCTGAGCTTGG----- mirR 20 11411
-----TCGGATCCGTCTGAGCTT----- mirR 18 3630
-----TCGGATCCGTCTGAGCTTGGCTG--- mirR 23 3630
-----TCGGATCCGTCTGAGCTTGGCTGG-- mirR 24 3010
-----ATCGGATCCGTCTGAGCTTGGC----- mirR 22 2469
-----CGGATCCGTCTGAGCTTGGCT----- mirR 21 1751
-----ATCGGATCCGTCTGAGCTTGG----- mirR 21 1295
-----CGGATCCGTCTGAGCTTGGC----- mirR 20 1275
-----CATCGGATCCGTCTGAGCTTGGC----- mirR 23 870
-----CATCGGATCCGTCTGAGCTTGG----- mirR 22 786
-----ATCGGATCCGTCTGAGCTTGG----- mirR 20 588
-----CGGATCCGTCTGAGCTTGG----- mirR 19 587
-----CGGATCCGTCTGAGCTTGG----- mirR 18 288
-----CGGATCCGTCTGAGCTTGGCTG--- mirR 22 234
-----CGGATCCGTCTGAGCTTGGCTGG-- mirR 23 216
-----ATCGGATCCGTCTGAGCTT----- mirR 19 201
```

```

-----CATCGGATCCGTCTGAGCTTG----- mirR 21 143
-----ATCGGATCCGTCTGAGCTTGGCT---- mirR 23 104
-----CATCGGATCCGTCTGAGCTT----- mirR 20 55
-----CATCGGATCCGTCTGAGC----- mirR 18 53
-----CGGATCCGTCTGAGCTTGGCTGGT- mirR 24 52
-----ATCGGATCCGTCTGAGCTTGGCTG--- mirR 24 49
-----GGATCCGTCTGAGCTTGGCT---- mirR 20 44
-----GGATCCGTCTGAGCTTGGC----- mirR 19 34
-----GGATCCGTCTGAGCTTGGCTGG-- mirR 22 30
-----ATCGGATCCGTCTGAGCT----- mirR 18 29
-----GGATCCGTCTGAGCTTGG----- mirR 18 25
-----GGATCCGTCTGAGCTTGGCTGGTC mirR 24 19
-----CATCGGATCCGTCTGAGCT----- mirR 19 17
-----GGATCCGTCTGAGCTTGGCTGGT- mirR 23 12
-----GGATCCGTCTGAGCTTGGCTG--- mirR 21 6
-----GATCCGTCTGAGCTTGGC----- mirR 18 4
-----GATCCGTCTGAGCTTGGCT---- mirR 19 3
-----CATCGGATCCGTCTGAGCTTGGCT--- mirR 24 2
-----GATCCGTCTGAGCTTGGCTGGTC mirR 23 2
-----TCATCGGATCCGTCTGAGCTTG----- mirR 22 1
-----TCATCGGATCCGTCTGAGCT----- mirR 20 1
-----TCATCGGATCCGTCTGAGCTTGGC---- mirR 24 1

```

>mmu-mir-328

```

GCTGTCTCGGAGCCTGGGGCAGGGGGCAGGAGGGGCTCAGGGAGAAAGTATCTACAGCCCTGGCCCTCTCTGCCCTTCCGTCCCTGTCCCAAGTACACTGGACCCAGCCCGAC species len reads
GCTGTCTCGGAGCCTGGGGC----- morL 20 1
-----GGGGGCAGGAGGGGCTC----- mirL 18 6
-----CAGGGGGCAGGAGGGGC----- mirL 18 3
-----GGGGGCAGGAGGGGCTCAGG-- mirL 21 3
-----GGGGGCAGGAGGGGCTCA----- mirL 19 2
-----GGGGGCAGGAGGGGCTCAG----- mirL 20 1
-----GGGGGCAGGAGGGGCTCAGGGA-- mirL 23 1
-----GGGGGCAGGAGGGGCTCAGGGA----- mirL 22 1
-----CTGGCCCTCTCTGCCCTTCCGTC-- mirR 23 55252
-----CTGGCCCTCTCTGCCCTTCCGT--- mirR 22 31815
-----CTGGCCCTCTCTGCCCTTCC----- mirR 19 21659
-----CTGGCCCTCTCTGCCCTTCC----- mirR 20 10542
-----CTGGCCCTCTCTGCCCTTCCG----- mirR 21 6208
-----CTGGCCCTCTCTGCCCTTCCGTCC-- mirR 24 5300
-----CTGGCCCTCTCTGCCCTT----- mirR 18 4419
-----CCTGGCCCTCTCTGCCCTTCCGTCC-- mirR 25 268
-----CCTGGCCCTCTCTGCCCTTCC----- mirR 20 247
-----CCTGGCCCTCTCTGCCCTTCCGT----- mirR 23 159
-----CCTGGCCCTCTCTGCCCTTCC----- mirR 21 121
-----TGGCCCTCTCTGCCCTTCCGT----- mirR 21 108
-----CCTGGCCCTCTCTGCCCTTCCGTC-- mirR 24 86

```

```

-----CCTGGCCCTCTGCCCCTCCG----- mirR 22 85
-----CCTGGCCCTCTGCCCCTT----- mirR 19 50
-----TGGCCCTCTGCCCCTCCGTC----- mirR 22 29
-----TGGCCCTCTGCCCCTTC----- mirR 18 15
-----TGGCCCTCTGCCCCTCCGTCC----- mirR 23 14
-----GGCCCTCTGCCCCTCCGT----- mirR 20 12
-----TGGCCCTCTGCCCCTCC----- mirR 19 9
-----TGGCCCTCTGCCCCTCCG----- mirR 20 9
-----GGCCCTCTGCCCCTCCGTC----- mirR 21 5
-----GGCCCTCTGCCCCTCCGTCC----- mirR 22 3
-----GGCCCTCTGCCCCTCCG----- mirR 19 2
-----CCCTGGCCCTCTGCCCCTCC----- mirR 23 2
-----CCCCTGGCCCTCTGCCCCTT----- mirR 21 1
-----GGCCCTCTGCCCCTCC----- mirR 18 1
-----CCCCTGGCCCTCTGCCCCTTC----- mirR 22 1
-----CCCTGGCCCTCTGCCCCTCCGT----- mirR 24 1
-----CCCTGGCCCTCTGCCCCTTC----- mirR 21 1
-----GCCCTCTGCCCCTCCGT----- mirR 19 1
-----TCCCCTGTCCCCAAGTACTGGACCCAGCCGAC morR 35 1
-----TCCCCTGTCCCCAAGTACTGGACCCAGCC----- morR 31 1
-----TCCCCTGTCCCCAAGTACTGG----- morR 23 1

```

>mmu-mir-149

| CTCTGGCTCCGTGTCTTCACTCCC       | species | len   | reads |
|--------------------------------|---------|-------|-------|
| -TCTGGCTCCGTGTCTTCACTCCC-----  | mirL 23 | 60664 |       |
| -TCTGGCTCCGTGTCTTCACTCC-----   | mirL 22 | 39436 |       |
| -TCTGGCTCCGTGTCTTCACTC-----    | mirL 21 | 14508 |       |
| -TCTGGCTCCGTGTCTTCACT-----     | mirL 19 | 5929  |       |
| -TCTGGCTCCGTGTCTTCACTCCC-----  | mirL 24 | 4761  |       |
| --CTGGCTCCGTGTCTTCACTCC-----   | mirL 22 | 3105  |       |
| --CTGGCTCCGTGTCTTCACTCC-----   | mirL 21 | 1972  |       |
| --CTGGCTCCGTGTCTTCACTC-----    | mirL 20 | 710   |       |
| --CTGGCTCCGTGTCTTCACTCCC-----  | mirL 23 | 256   |       |
| --CTGGCTCCGTGTCTTCACT-----     | mirL 18 | 169   |       |
| CTCTGGCTCCGTGTCTTCACTCCC-----  | mirL 24 | 15    |       |
| ----GGCTCCGTGTCTTCACTCCC-----  | mirL 20 | 12    |       |
| ----TGGCTCCGTGTCTTCACTCCC----- | mirL 21 | 8     |       |
| CTCTGGCTCCGTGTCTTCACTCC-----   | mirL 23 | 8     |       |
| CTCTGGCTCCGTGTCTTCACTC-----    | mirL 22 | 6     |       |
| ----TGGCTCCGTGTCTTCACTCC-----  | mirL 20 | 5     |       |
| ----TGGCTCCGTGTCTTCACTC-----   | mirL 19 | 2     |       |
| ----GGCTCCGTGTCTTCACTCC-----   | mirL 19 | 2     |       |
| CTCTGGCTCCGTGTCTTCTC-----      | mirL 18 | 1     |       |
| CTCTGGCTCCGTGTCTTCACT-----     | mirL 20 | 1     |       |
| ----TGGCTCCGTGTCTTCACTCCC----- | mirL 23 | 1     |       |
| ----GGCTCCGTGTCTTCACTC-----    | mirL 18 | 1     |       |

```
---GGCTCCGTGTCTTCACTCCCG----- mirL 21 1  
---TGGCTCCGTGTCTTCACTCCCG----- mirL 22 1  
-----AGGAGGGAGGGAGGGACGGG mirR 20 1
```

>mmu-mir-27b

```
GCGATGACCTCTCTAACAAGGTGCAGAGCTTAGCTGATTGGTGAACAGTGATTGGTTCCGCTTTGTTACAGTGGCTAAGTTCTGCACCTGAAGAGAAGGTGAG species len reads  
-----GACCTCTCTAACAAGGTG----- morL 18 2  
-----TGACCTCTCTAACAAGGTGCA----- morL 21 1  
GCGATGACCTCTCTAACAAGGTGC----- morL 24 1  
-----AGAGCTTAGCTGATTGGTGAAC----- mirL 22 82  
-----AGAGCTTAGCTGATTGGTGA----- mirL 20 43  
-----AGAGCTTAGCTGATTGGTGAA----- mirL 21 42  
-----AGAGCTTAGCTGATTGGTG----- mirL 19 14  
-----AGAGCTTAGCTGATTGGTGAACAGT----- mirL 25 13  
-----CAGAGCTTAGCTGATTGGTGAAC----- mirL 23 5  
-----CAGAGCTTAGCTGATTGGTGA----- mirL 21 2  
-----GCAGAGCTTAGCTGATTGGTGAA----- mirL 23 1  
-----CAGAGCTTAGCTGATTGGTGA----- mirL 22 1  
-----TTCACAGTGGCTAAGTTCTGC----- mirR 21 54090  
-----TTCACAGTGGCTAAGTTCTG----- mirR 20 30868  
-----TTCACAGTGGCTAAGTTCT----- mirR 19 16394  
-----TTCACAGTGGCTAAGTTCTGCAC----- mirR 23 6764  
-----TTCACAGTGGCTAAGTTCTGCA----- mirR 22 5525  
-----TCACAGTGGCTAAGTTCTGC----- mirR 20 3452  
-----TCACAGTGGCTAAGTTCTG----- mirR 19 2503  
-----TCACAGTGGCTAAGTTCT----- mirR 18 1333  
-----TTCACAGTGGCTAAGTTCTGCACC----- mirR 24 1132  
-----GTTACAGTGGCTAAGTTCTGC----- mirR 22 920  
-----TCACAGTGGCTAAGTTCTGCAC----- mirR 22 727  
-----TCACAGTGGCTAAGTTCTGCA----- mirR 21 676  
-----GTTACAGTGGCTAAGTTCTG----- mirR 21 178  
-----TCACAGTGGCTAAGTTCTGCACC----- mirR 23 163  
-----GTTACAGTGGCTAAGTTCT----- mirR 20 134  
-----TTCACAGTGGCTAAGTTCTGCACCT----- mirR 25 71  
-----GTTACAGTGGCTAAGTTCTGCA----- mirR 23 45  
-----TCACAGTGGCTAAGTTCTGCACCT----- mirR 24 15  
-----CACAGTGGCTAAGTTCTGC----- mirR 19 15  
-----GTTACAGTGGCTAAGTTCTGCACC----- mirR 25 14  
-----GTTACAGTGGCTAAGTTCTGCAC----- mirR 24 12  
-----CACAGTGGCTAAGTTCTGCAC----- mirR 21 11  
-----CACAGTGGCTAAGTTCTG----- mirR 18 9  
-----GTTACAGTGGCTAAGTTCT----- mirR 19 9  
-----ACAGTGGCTAAGTTCTGC----- mirR 18 7  
-----CACAGTGGCTAAGTTCTGCACC----- mirR 22 5  
-----ACAGTGGCTAAGTTCTGCA----- mirR 19 3  
-----TGTTACAGTGGCTAAGTTCTGC----- mirR 23 3
```



```
-----CACAGTGGCTAAGTTCTGCA----- mirR 20 2
-----ACAGTGGCTAAGTTCTGCACC----- mirR 21 1
-----ACAGTGGCTAAGTTCTGCAC----- mirR 20 1
-----GCACCTGAAGAGAAGGTGAG morR 20 1
```

>mmu-mir-429

```
TGCTGATGGATGTCTTACCAGACATGGTTAGATCTGGATGCATCTGTCTAATACTGTCTGGTAATGCCGTCCA species len reads
TGCTGATGGATGTCTTAC----- mirL 18 1
-----TAATACTGTCTGGTAATGCCGTCC-- mirR 23 41172
-----TAATACTGTCTGGTAATGCCGT--- mirR 22 25541
-----TAATACTGTCTGGTAATGC----- mirR 19 24406
-----TAATACTGTCTGGTAATGCCG--- mirR 21 7683
-----TAATACTGTCTGGTAATGCC---- mirR 20 7282
-----AATACTGTCTGGTAATGCCGT--- mirR 21 5245
-----TAATACTGTCTGGTAATGCCGTCC- mirR 24 4252
-----AATACTGTCTGGTAATGCCGTCC-- mirR 22 2418
-----AATACTGTCTGGTAATGCCG--- mirR 20 1288
-----AATACTGTCTGGTAATGC----- mirR 18 996
-----AATACTGTCTGGTAATGCC---- mirR 19 843
-----AATACTGTCTGGTAATGCCGTCC- mirR 23 737
-----TAATACTGTCTGGTAATG----- mirR 18 573
-----AATACTGTCTGGTAATGCCGTCCA mirR 24 83
-----CTAATACTGTCTGGTAATGC----- mirR 20 49
-----CTAATACTGTCTGGTAATGCC---- mirR 21 39
-----CTAATACTGTCTGGTAATGCCG--- mirR 22 34
-----CTAATACTGTCTGGTAATGCCGTCC- mirR 25 28
-----CTAATACTGTCTGGTAATGCCGT--- mirR 23 22
-----ATACTGTCTGGTAATGCCGT--- mirR 20 16
-----CTAATACTGTCTGGTAATGCCGTCC-- mirR 24 16
-----ATACTGTCTGGTAATGCCGTCC-- mirR 21 11
-----ATACTGTCTGGTAATGCCGTCC- mirR 22 8
-----CTAATACTGTCTGGTAAT----- mirR 18 4
-----TCTAATACTGTCTGGTAATGCCGT--- mirR 24 3
-----ATACTGTCTGGTAATGCCG--- mirR 19 3
-----TACTGTCTGGTAATGCCGTCC-- mirR 20 2
-----ATACTGTCTGGTAATGCC---- mirR 18 2
-----TCTAATACTGTCTGGTAATGC----- mirR 21 1
-----TACTGTCTGGTAATGCCGT--- mirR 19 1
```

>mmu-mir-382

```
AGAAGTTGTTCGTGGTGGATTCGCTTTACTTGTGACGAATCATTACGGACAACACTTTTTT species len reads
-GAAGTTGTTCGTGGTGGATTC----- mirL 21 40680
-GAAGTTGTTCGTGGTGGATTCG----- mirL 22 23309
-GAAGTTGTTCGTGGTGGATTCGC----- mirL 23 11498
-GAAGTTGTTCGTGGTGGATT----- mirL 20 6372
-GAAGTTGTTCGTGGTGGAT----- mirL 19 5168
```

```
--AAGTTGTTTCGTGGTGGATTTCG----- mirL 21 941
--AGTTGTTTCGTGGTGGATTTCGCT----- mirL 22 546
--AAGTTGTTTCGTGGTGGATTTC----- mirL 20 375
--AAGTTGTTTCGTGGTGGATTTCGC----- mirL 22 342
---AGTTGTTTCGTGGTGGATTTCGC----- mirL 21 292
---AGTTGTTTCGTGGTGGATTTC----- mirL 19 182
---AGTTGTTTCGTGGTGGATTTCG----- mirL 20 180
--AAGTTGTTTCGTGGTGGATT----- mirL 19 125
--AAGTTGTTTCGTGGTGGAT----- mirL 18 79
---AGTTGTTTCGTGGTGGATT----- mirL 18 64
AGAAGTTGTTTCGTGGTGGATTTC----- mirL 22 12
---GTTGTTTCGTGGTGGATTTCG----- mirL 19 9
---GTTGTTTCGTGGTGGATTTCGC----- mirL 20 5
AGAAGTTGTTTCGTGGTGGATTTCG----- mirL 23 4
AGAAGTTGTTTCGTGGTGGAT----- mirL 20 3
AGAAGTTGTTTCGTGGTGG----- mirL 18 2
---GTTGTTTCGTGGTGGATTTCGCT----- mirL 21 1
AGAAGTTGTTTCGTGGTGG----- mirL 19 1
---GTTGTTTCGTGGTGGATTTCGCTTT----- mirL 23 1
-----AATCATTCACGGACAACACTTT--- mirR 22 23095
-----AATCATTCACGGACAACACTT--- mirR 21 2528
-----AATCATTCACGGACAACAC----- mirR 19 1624
-----AATCATTCACGGACAACACTTTTT-- mirR 23 1001
-----ATCATTCACGGACAACACTTT--- mirR 21 573
-----AATCATTCACGGACAACACT----- mirR 20 327
-----AATCATTCACGGACAACA----- mirR 18 291
-----ATCATTCACGGACAACACTTTTT-- mirR 22 146
-----AATCATTCACGGACAACACTTTTTT mirR 25 78
-----ATCATTCACGGACAACACTTTTT- mirR 23 48
-----ATCATTCACGGACAACAC----- mirR 18 35
-----ATCATTCACGGACAACACTT--- mirR 20 20
-----ATCATTCACGGACAACACT----- mirR 19 14
-----TCATTCACGGACAACACTTT--- mirR 20 12
-----CATTCACGGACAACACTTT--- mirR 19 11
-----CGAATCATTCACGGACAACACTT--- mirR 23 10
-----GAATCATTCACGGACAACACTT--- mirR 22 5
-----GAATCATTCACGGACAACACTTT--- mirR 23 5
-----TCATTCACGGACAACACTT--- mirR 19 5
-----CATTCACGGACAACACTT--- mirR 18 3
-----TCATTCACGGACAACACTTTTT-- mirR 21 2
-----TCATTCACGGACAACACTTTTT- mirR 22 2
-----CGAATCATTCACGGACAACACT--- mirR 22 1
-----CGAATCATTCACGGACAAC----- mirR 19 1
-----CGAATCATTCACGGACAACACTTTTT-- mirR 25 1
-----CGAATCATTCACGGACAACAC----- mirR 21 1
-----CGAATCATTCACGGACAACACTTT--- mirR 24 1
```

```

-----ATCATTACGGACAACACTTTTTT mirR 24 1

>mmu-mir-30e
TTTTCTGGGCAGTCTTTGCTACTGTAAACATCCTTGACTGGAAGCTGTAAGGTGTTGAGAGGAGCTTTCAGTCGGATGTTTACAGCGGCAGGCTGCCACAGTCGTCCC species len reads
TTTTCTGGGCAGTCTTTGCTAC-----morL 22 2
-TTCTGGGCAGTCTTTGCTA-----morL 20 1
-----TGTA AACATCCTTGACTGGAAGC-----mirL 23 45831
-----TGTA AACATCCTTGACTGGA-----mirL 21 14815
-----TGTA AACATCCTTGACTGGA-----mirL 20 13935
-----GTA AACATCCTTGACTGGAAGC-----mirL 22 10575
-----TGTA AACATCCTTGACTGG-----mirL 19 7193
-----TGTA AACATCCTTGACTGGAAGCTGT-----mirL 26 6429
-----GTA AACATCCTTGACTGGA-----mirL 20 2986
-----GTA AACATCCTTGACTGGA-----mirL 19 1941
-----GTA AACATCCTTGACTGGAAGCTGT-----mirL 25 1447
-----GTA AACATCCTTGACTGGAAGCT-----mirL 23 1202
-----TAA ACATCCTTGACTGGAAGCT-----mirL 22 74
-----TAA ACATCCTTGACTGGAAGC-----mirL 21 59
-----AA ACATCCTTGACTGGAAGCTG-----mirL 22 21
-----TAA ACATCCTTGACTGGAAGCTG-----mirL 23 21
-----AA ACATCCTTGACTGGAAGC-----mirL 20 17
-----CTGTAA ACATCCTTGACTGGAAGC-----mirL 24 17
-----AA ACATCCTTGACTGGAAGCT-----mirL 21 15
-----TAA ACATCCTTGACTGGAAG-----mirL 20 14
-----TAA ACATCCTTGACTGGAAGCTGT-----mirL 24 13
-----AA ACATCCTTGACTGGAAGCTGT-----mirL 23 11
-----CTGTAA ACATCCTTGACTGGA-----mirL 22 6
-----ACTGTAA ACATCCTTGACTGGAAGC-----mirL 25 5
-----AA ACATCCTTGACTGGAAG-----mirL 19 3
-----CTGTAA ACATCCTTGACTG-----mirL 19 2
-----CTGTAA ACATCCTTGACTGG-----mirL 20 2
-----CTGTAA ACATCCTTGACTGGAAG-----mirL 23 1
-----ACTGTAA ACATCCTTGACTG-----mirL 20 1
-----GTAAGGTGTTGAGAGGAGC-----loop 19 3
-----GTAAGGTGTTGAGAGGAGCTT-----loop 21 1
-----CTTTCAGTCGGATGTTTACAG-----mirR 22 6157
-----CTTTCAGTCGGATGTTTAC-----mirR 19 2570
-----CTTTCAGTCGGATGTTTACAG-----mirR 21 1923
-----CTTTCAGTCGGATGTTTACAGCG-----mirR 23 935
-----CTTTCAGTCGGATGTTTACA-----mirR 20 714
-----CTTTCAGTCGGATGTTTACAGCGGC-----mirR 25 226
-----CTTTCAGTCGGATGTTTA-----mirR 18 219
-----TTTCAGTCGGATGTTTACAG-----mirR 21 86
-----TTTCAGTCGGATGTTTACAGCG-----mirR 22 52
-----GCTTTCAGTCGGATGTTTACAG-----mirR 23 24
-----TTTCAGTCGGATGTTTAC-----mirR 18 22

```

```

-----TTCAGTCGGATGTTTACAG----- mirR 20 16
-----TTCAGTCGGATGTTTACAGC----- mirR 20 10
-----TTCAGTCGGATGTTTACA----- mirR 19 9
-----GCTTTCAGTCGGATGTTTAC----- mirR 20 8
-----TTCAGTCGGATGTTTACAGCGC----- mirR 23 3
-----TTCAGTCGGATGTTTACAGCG----- mirR 21 3
-----TTCAGTCGGATGTTTACAGCGC----- mirR 24 3
-----TTCAGTCGGATGTTTACAG----- mirR 19 3
-----GCTTTCAGTCGGATGTTTACA----- mirR 21 2
-----GCTTTCAGTCGGATGTTTA----- mirR 19 2
-----AGCTTTCAGTCGGATGTTTAC----- mirR 21 2
-----AGCTTTCAGTCGGATGTTTACAGC----- mirR 24 2
-----TTCAGTCGGATGTTTACA----- mirR 18 1
-----TCAGTCGGATGTTTACAG----- mirR 18 1
-----GCTTTCAGTCGGATGTTTACAGCG----- mirR 24 1
-----TTCAGTCGGATGTTTACAGCGG----- mirR 23 1
-----TTCAGTCGGATGTTTACAGCGG----- mirR 22 1
-----GCAGGCTGCCACAGTCGTC----- morR 19 2
-----CGGCAGGCTGCCACAGTC----- morR 18 2
-----CAGGCTGCCACAGTCGTC----- morR 18 1
-----CGGCAGGCTGCCACAGTCGTC----- morR 21 1
-----GCAGGCTGCCACAGTCGTCC----- morR 21 1

```

>mmu-mir-130a

```

CCTTTGCTGCTGGCCGAGCTCTTTTACATTGTGCTACTGTCTAACGTGTACCGAGCAGTGCAATGTTAAAAGGGCATCGGCCTTGTAGTACTACCCA species len reads
CCTTTGCTGCTGGCCGAGCT----- morL 21 1
-----GCTCTTTTACATTGTGCTACT----- mirL 22 560
-----GCTCTTTTACATTGTGCTAC----- mirL 21 263
-----GCTCTTTTACATTGTGC----- mirL 18 25
-----GCTCTTTTACATTGTGCTA----- mirL 20 25
-----GCTCTTTTACATTGTGCTACTG----- mirL 23 16
-----AGCTCTTTTACATTGTGCTAC----- mirL 22 7
-----AGCTCTTTTACATTGTGCT----- mirL 20 6
-----AGCTCTTTTACATTGTGCTACT----- mirL 23 5
-----AGCTCTTTTACATTGTGC----- mirL 19 3
-----AGCTCTTTTACATTGTGCTA----- mirL 21 3
-----CTTTTACATTGTGCTAC----- mirL 18 1
-----GGAGCTCTTTTACATTGTGCTAC----- mirL 24 1
-----GGAGCTCTTTTACATTGTGCTACT----- mirL 25 1
-----CAGTGCAATGTTAAAAGGGCATC----- mirR 23 62721
-----CAGTGCAATGTTAAAAGGGCAT----- mirR 22 33480
-----CAGTGCAATGTTAAAAGGGC----- mirR 20 9564
-----CAGTGCAATGTTAAAAGGGCA----- mirR 21 7214
-----CAGTGCAATGTTAAAAGGGCATCG----- mirR 24 2076
-----CAGTGCAATGTTAAAAGGG----- mirR 19 1011
-----CAGTGCAATGTTAAAAGG----- mirR 18 694

```

```

-----AGTGCAATGTTAAAAGGGCAT----- mirR 21 202
-----AGTGCAATGTTAAAAGGGCATC----- mirR 22 76
-----GCAGTGCAATGTTAAAAGGGCATC----- mirR 24 39
-----AGTGCAATGTTAAAAGGGC----- mirR 19 37
-----AGTGCAATGTTAAAAGGGCATCG----- mirR 23 36
-----GTGCAATGTTAAAAGGGCAT----- mirR 20 26
-----GCAGTGCAATGTTAAAAGGGCAT----- mirR 23 25
-----AGTGCAATGTTAAAAGGGCA----- mirR 20 23
-----GCAGTGCAATGTTAAAAGGGC----- mirR 21 14
-----TGCAATGTTAAAAGGGCAT----- mirR 19 9
-----GCAGTGCAATGTTAAAAGGGCA----- mirR 22 6
-----AGTGCAATGTTAAAAGGGCATCGG----- mirR 24 5
-----GTGCAATGTTAAAAGGGCATC----- mirR 21 4
-----TGCAATGTTAAAAGGGCATCG----- mirR 21 3
-----GCAGTGCAATGTTAAAAGG----- mirR 19 3
-----GTGCAATGTTAAAAGGGCA----- mirR 19 2
-----GTGCAATGTTAAAAGGGC----- mirR 18 2
-----AGTGCAATGTTAAAAGGG----- mirR 18 1
-----TGCAATGTTAAAAGGGCATC----- mirR 20 1
-----GCAGTGCAATGTTAAAAGGGCATCG----- mirR 25 1
-----AGCAGTGCAATGTTAAAAGGGCAT----- mirR 24 1
-----GGCCTTGTAGTACTACCCA morR 19 1

```

>mmu-let-7d

```

AAAATGGGTTCTTAGGAAGAGGTAGTAGGTTGCATAGTTTATAGGGCAGAGATTTTGCCCAAGGAGTTAACTATACGACCTGCTGCCTTTCTTAGGGCCTTATTATACCAGCATAACGTTTC species len read
AAAATGGGTTCTTAGGAA----- morL 18 1
-----AGAGGTAGTAGGTTGCATAGTT----- mirL 22 22470
-----AGAGGTAGTAGGTTGCATAG----- mirL 20 14778
-----AGAGGTAGTAGGTTGCATAGT----- mirL 21 12272
-----AGAGGTAGTAGGTTGCATA----- mirL 19 11359
-----AGAGGTAGTAGGTTGCATAGTT----- mirL 23 6100
-----GAGGTAGTAGGTTGCATAG----- mirL 19 538
-----GAGGTAGTAGGTTGCATAGT----- mirL 20 282
-----GAGGTAGTAGGTTGCATA----- mirL 18 218
-----AAGAGGTAGTAGGTTGCATAGTT----- mirL 23 86
-----AAGAGGTAGTAGGTTGCATAGT----- mirL 22 84
-----GAGGTAGTAGGTTGCATAGTT----- mirL 21 82
-----AAGAGGTAGTAGGTTGCATAG----- mirL 21 77
-----AAGAGGTAGTAGGTTGCATA----- mirL 20 64
-----AAGAGGTAGTAGGTTGCAT----- mirL 19 43
-----GAGGTAGTAGGTTGCATAGTT----- mirL 22 26
-----GGTAGTAGGTTGCATAGT----- mirL 18 7
-----AGGTAGTAGGTTGCATAGTT----- mirL 20 5
-----GGTAGTAGGTTGCATAGTT----- mirL 19 5
-----AGGTAGTAGGTTGCATAGT----- mirL 19 4
-----AGGTAGTAGGTTGCATAG----- mirL 18 4

```

```

-----AGGTAGTAGGTTGCATAGTTT----- mirL 21 3
-----GGTAGTAGGTTGCATAGTTT----- mirL 20 2
-----GAAGAGGTAGTAGGTTGCATAGTT----- mirL 24 1
-----GGAAGAGGTAGTAGGTTGC----- mirL 19 1
-----GGAAGAGGTAGTAGGTTGCATA----- mirL 22 1
-----GGTAGTAGGTTGCATAGTTT----- mirL 21 1
-----CTATACGACCTGCTGCCTTTCT----- mirR 22 29278
-----CTATACGACCTGCTGCCTTTC----- mirR 21 10925
-----CTATACGACCTGCTGCCTTT----- mirR 20 4363
-----CTATACGACCTGCTGCCTT----- mirR 19 1680
-----CTATACGACCTGCTGCCTTTCTT----- mirR 23 986
-----TATACGACCTGCTGCCTTTCT----- mirR 21 797
-----CTATACGACCTGCTGCCT----- mirR 18 604
-----TATACGACCTGCTGCCTTTC----- mirR 20 299
-----TATACGACCTGCTGCCTTT----- mirR 19 154
-----CTATACGACCTGCTGCCTTTCTTA----- mirR 24 122
-----ATACGACCTGCTGCCTTTCT----- mirR 20 110
-----TATACGACCTGCTGCCTT----- mirR 18 40
-----TATACGACCTGCTGCCTTTCTT----- mirR 22 40
-----ATACGACCTGCTGCCTTTC----- mirR 19 34
-----ATACGACCTGCTGCCTTT----- mirR 18 19
-----TATACGACCTGCTGCCTTTCTTA----- mirR 23 13
-----ATACGACCTGCTGCCTTTCTT----- mirR 21 11
-----ACTATACGACCTGCTGCCTTTC----- mirR 22 6
-----TACGACCTGCTGCCTTTCT----- mirR 19 3
-----TATACGACCTGCTGCCTTTCTTAGGGC----- mirR 27 2
-----TAACTATACGACCTGCTGCC----- mirR 20 2
-----AACTATACGACCTGCTGCCTTTC----- mirR 23 2
-----TAACTATACGACCTGCTGC----- mirR 19 2
-----ACTATACGACCTGCTGCCTTTCT----- mirR 23 2
-----ATACGACCTGCTGCCTTTCTTA----- mirR 22 2
-----AACTATACGACCTGCTGCCTTT----- mirR 22 1
-----ACTATACGACCTGCTGCC----- mirR 18 1
-----TAACTATACGACCTGCTGCCTTTC----- mirR 24 1
-----AACTATACGACCTGCTGCC----- mirR 19 1
-----TTAGGGCCTTATTATACCAGC----- morR 21 3
-----GGCCTTATTATACCAGCA----- morR 18 3
-----TTAGGGCCTTATTATACCAGCATAACGTTTC morR 30 2
-----AGGGCCTTATTATACCAG----- morR 18 1

```

>mmu-mir-30a

```

AACGTTGACAGTGAGCGACTGTAAACATCCTCGACTGGAAGCTGTGAAGCCACAAATGGGCTTTTCAGTCGGATGTTTGCAGCTGCCTACTGCCTCCAAC species len reads
AACGTTGACAGTGAGCGAC----- morL 19 1
-----TGTAACATCCTCGACTGGAAGC----- mirL 23 40027
-----TGTAACATCCTCGACTGGAA----- mirL 21 14894
-----TGTAACATCCTCGACTGGA----- mirL 20 11702

```

```

-----TGTAACATCCTCGACTGG----- mirL 19 6841
-----GTAACATCCTCGACTGGAAGC----- mirL 22 6066
-----TGTAACATCCTCGACTGGAAGCT----- mirL 24 5961
-----GTAACATCCTCGACTGGAA----- mirL 20 2178
-----GTAACATCCTCGACTGGA----- mirL 19 1236
-----GTAACATCCTCGACTGGAAGCT----- mirL 23 896
-----GTAACATCCTCGACTGGAAG----- mirL 21 857
-----TAAACATCCTCGACTGGAAGCT----- mirL 22 43
-----TAAACATCCTCGACTGGAAGC----- mirL 21 32
-----CTGTAACATCCTCGACTGGAAGC----- mirL 24 17
-----TAAACATCCTCGACTGGAA----- mirL 19 12
-----AAACATCCTCGACTGGAAGC----- mirL 20 12
-----TAAACATCCTCGACTGGAAGCTG----- mirL 23 11
-----AAACATCCTCGACTGGAAGCTG----- mirL 22 9
-----AAACATCCTCGACTGGAA----- mirL 18 8
-----AAACATCCTCGACTGGAAG----- mirL 19 5
-----TAAACATCCTCGACTGGA----- mirL 18 5
-----AAACATCCTCGACTGGAAGCT----- mirL 21 5
-----ACTGTAACATCCTCGACTGGAA----- mirL 23 3
-----CTGTAACATCCTCGACTGGA----- mirL 21 3
-----CTGTAACATCCTCGACTGGAAGCT----- mirL 25 2
-----CTGTAACATCCTCGACTGG----- mirL 20 2
-----ACTGTAACATCCTCGACTGGAAGC----- mirL 25 2
-----CTGTAACATCCTCGACTGGAA----- mirL 22 1
-----ACTGTAACATCCTCGACTGGAAGCT----- mirL 26 1
-----GACTGTAACATCCTCGACTGGAA----- mirL 24 1
-----CTTTCAGTCGGATGTTTGCAGC----- mirR 22 14721
-----CTTTCAGTCGGATGTTTGC----- mirR 19 3887
-----CTTTCAGTCGGATGTTTGCAG----- mirR 21 3382
-----CTTTCAGTCGGATGTTTGCAGCT----- mirR 23 1204
-----CTTTCAGTCGGATGTTTGCAG----- mirR 20 1075
-----TTTCAGTCGGATGTTTGCAGC----- mirR 21 1013
-----TTTCAGTCGGATGTTTGCAGCT----- mirR 22 274
-----CTTTCAGTCGGATGTTTGC----- mirR 18 260
-----TTTCAGTCGGATGTTTGC----- mirR 18 178
-----TTTCAGTCGGATGTTTGCAG----- mirR 20 167
-----CTTTCAGTCGGATGTTTGCAGCTG----- mirR 24 153
-----TTCAGTCGGATGTTTGCAGC----- mirR 20 121
-----TTCAGTCGGATGTTTGCAGCT----- mirR 21 69
-----TTTCAGTCGGATGTTTGCAG----- mirR 19 56
-----TTTCAGTCGGATGTTTGCAGCTG----- mirR 23 30
-----GCTTTCAGTCGGATGTTTGCAGC----- mirR 23 23
-----TTTCAGTCGGATGTTTGCAGCTGC----- mirR 24 20
-----TTCAGTCGGATGTTTGCAG----- mirR 19 18
-----TTCAGTCGGATGTTTGCAGCTGC----- mirR 23 10
-----GCTTTCAGTCGGATGTTTGC----- mirR 20 6

```

```

-----TTCAGTCGGATGTTTGCA----- mirR 18 5
-----GCTTTCAGTCGGATGTTTGCAG----- mirR 22 4
-----GCTTTCAGTCGGATGTTTGCA----- mirR 21 4
-----TTCAGTCGGATGTTTGCAGCTG----- mirR 22 3
-----GGGCTTTCAGTCGGATGTTTGCAGC----- mirR 25 2
-----TTCAGTCGGATGTTTGCAGCTGCCT----- mirR 25 1
-----GCTTTCAGTCGGATGTTTGCAGCT----- mirR 24 1
-----GCTGCCTACTGCCTCCAACCT morR 20 1

>mmu-mir-212
GCACCTTGGCTCTAGACTGCTTACTGCCGGGCGCCTTTCAGTAACAGTCTCCAGTCACGGCCACCGACGCCTGGCCCCGCCCCAGGACCGCCGACCCCC species len reads
--ACCTTGGCTCTAGACTGCTTACT----- mirL 22 11186
--ACCTTGGCTCTAGACTGCTTACT----- mirL 23 4383
--ACCTTGGCTCTAGACTGC----- mirL 18 3838
--ACCTTGGCTCTAGACTGCTTACTGC----- mirL 25 1852
--ACCTTGGCTCTAGACTGCT----- mirL 19 1075
---CCTTGGCTCTAGACTGCTTACT----- mirL 22 126
---CCTTGGCTCTAGACTGCTTACTGCC----- mirL 25 58
---CCTTGGCTCTAGACTGCTTACTGC----- mirL 24 34
---CCTTGGCTCTAGACTGCTTACT----- mirL 21 31
---CCTTGGCTCTAGACTGCTTACTG----- mirL 23 20
-CACCTTGGCTCTAGACTGCTTACT----- mirL 23 6
---CTTGGCTCTAGACTGCTTACT----- mirL 21 3
GCACCTTGGCTCTAGACTGC----- mirL 20 2
-CACCTTGGCTCTAGACTGC----- mirL 19 2
---CTTGGCTCTAGACTGCTTACTGC----- mirL 23 1
GCACCTTGGCTCTAGACTGCTT----- mirL 22 1
----TTGGCTCTAGACTGCTTACTG----- mirL 21 1
----TTGGCTCTAGACTGCTTACT----- mirL 20 1
-----TAACAGTCTCCAGTCACGGCCAC----- mirR 23 43226
-----TAACAGTCTCCAGTCACGGCC----- mirR 21 13625
-----TAACAGTCTCCAGTCACGGCCA----- mirR 22 11085
-----TAACAGTCTCCAGTCACGGC----- mirR 20 7190
-----TAACAGTCTCCAGTCACGGCCACC----- mirR 24 6782
-----AACAGTCTCCAGTCACGGCCAC----- mirR 22 2794
-----TAACAGTCTCCAGTCACGG----- mirR 19 2329
-----AACAGTCTCCAGTCACGGCCA----- mirR 21 1672
-----TAACAGTCTCCAGTCACG----- mirR 18 1465
-----AACAGTCTCCAGTCACGGCC----- mirR 20 880
-----AACAGTCTCCAGTCACGGCCACC----- mirR 23 625
-----AACAGTCTCCAGTCACGGC----- mirR 19 548
-----GTAACAGTCTCCAGTCACGGCC----- mirR 22 471
-----GTAACAGTCTCCAGTCACGGCCACC----- mirR 25 292
-----GTAACAGTCTCCAGTCAC----- mirR 18 229
-----GTAACAGTCTCCAGTCACGGCCAC----- mirR 24 169
-----AACAGTCTCCAGTCACGG----- mirR 18 162

```



```

-----GTAACAGTCTCCAGTCACGGCCA----- mirR 23 137
-----AACAGTCTCCAGTCACGGCCACCG----- mirR 24 129
-----GTAACAGTCTCCAGTCACGGC----- mirR 21 126
-----GTAACAGTCTCCAGTCACGG----- mirR 20 83
-----ACAGTCTCCAGTCACGGCCAC----- mirR 21 9
-----ACAGTCTCCAGTCACGGCCA----- mirR 20 4
-----ACAGTCTCCAGTCACGGCC----- mirR 19 3
-----AGTAACAGTCTCCAGTCACGGCC----- mirR 23 2
-----AGTAACAGTCTCCAGTCAC----- mirR 19 2
-----ACAGTCTCCAGTCACGGC----- mirR 18 2
-----AGTAACAGTCTCCAGTCACGGCCA----- mirR 24 1
-----AGTAACAGTCTCCAGTCACGGCCACCG----- mirR 27 1
-----CAGTCTCCAGTCACGGCCACC----- mirR 21 1
-----CAGTCTCCAGTCACGGCCAC----- mirR 20 1
-----ACAGTCTCCAGTCACGGCCACC----- mirR 22 1
-----AGTAACAGTCTCCAGTCACG----- mirR 20 1
-----CAGTCTCCAGTCACGGCCA----- mirR 19 1
-----ACGCCTGGCCCCGCCCA----- morR 18 2
-----CGACGCCTGGCCCCGCCCAGGACCGCCGACCCCC morR 35 1
-----CACCGACGCCTGGCCCCGC----- morR 19 1
-----CACCGACGCCTGGCCCCG----- morR 18 1
-----GACGCCTGGCCCCGCC----- morR 18 1

```

>mmu-mir-342

```

TGTGAAAATGGGCTCAAGGTGAGGGGTGCTATCTGTGATTGAGGGACATGGTCAATGGAATTGTCTCACACAGAAATCGACCCGTCACCTTGGCCTGCTGAGCACCACCAGAACCAAGAA species len reads
TGTGAAAATGGGCTCAAGG----- morL 19 1
-GTGAAAATGGGCTCAAGG----- morL 18 1
-----AGGGGTGCTATCTGTGATTGA----- mirL 21 288
-----AGGGGTGCTATCTGTGATTGAG----- mirL 22 205
-----AGGGGTGCTATCTGTGATTG----- mirL 20 128
-----AGGGGTGCTATCTGTGATTGAGG----- mirL 23 115
-----AGGGGTGCTATCTGTGATTGAGGGA----- mirL 25 100
-----GGGGTGCTATCTGTGATTGAG----- mirL 21 59
-----GGGGTGCTATCTGTGATTGAGGGAC----- mirL 25 56
-----GGGGTGCTATCTGTGATTGA----- mirL 20 53
-----GGGGTGCTATCTGTGATTGAGGG----- mirL 23 47
-----GGGGTGCTATCTGTGATTGAGG----- mirL 22 42
-----GGTGCTATCTGTGATTGAG----- mirL 19 1
-----GGGTGCTATCTGTGATTGAG----- mirL 20 1
-----GGACATGGTCAATGGAAT----- loop 18 1
-----TCTCACACAGAAATCGACCCGTC----- mirR 24 32410
-----TCTCACACAGAAATCGACCC----- mirR 20 24441
-----TCTCACACAGAAATCGACCCGT----- mirR 23 14284
-----TCTCACACAGAAATCGACCC----- mirR 21 13136
-----TCTCACACAGAAATCGCAC----- mirR 19 6471
-----TCTCACACAGAAATCGACCCG----- mirR 22 5268

```

```

-----TCACACAGAAATCGCACCCGTC----- mirR 22 2473
-----CTCACACAGAAATCGCACCCGTC----- mirR 23 1989
-----TCTCACACAGAAATCGCACCCGTC----- mirR 25 1976
-----CTCACACAGAAATCGCACC----- mirR 19 1292
-----TCACACAGAAATCGCACC----- mirR 18 1093
-----TCACACAGAAATCGCACCCGT----- mirR 21 963
-----CTCACACAGAAATCGCACCCGT----- mirR 22 674
-----TCACACAGAAATCGCACCCGTC----- mirR 23 667
-----TCACACAGAAATCGCACC----- mirR 19 593
-----CTCACACAGAAATCGCACC----- mirR 20 495
-----TCACACAGAAATCGCACCCGTC----- mirR 24 236
-----CTCACACAGAAATCGCAC----- mirR 18 235
-----TCACACAGAAATCGCACCCGTCACC----- mirR 25 213
-----CTCACACAGAAATCGCACCCG----- mirR 21 134
-----CACACAGAAATCGCACCCGTCAC----- mirR 23 87
-----CTCACACAGAAATCGCACCCGTC----- mirR 24 86
-----CACACAGAAATCGCACCCGT----- mirR 20 45
-----CACACAGAAATCGCACCCGTC----- mirR 21 34
-----CACACAGAAATCGCACCCGTC----- mirR 22 30
-----CACACAGAAATCGCACC----- mirR 18 19
-----CACACAGAAATCGCACCCG----- mirR 19 19
-----GTCTCACACAGAAATCGCACCC----- mirR 22 11
-----GTCTCACACAGAAATCGCACCCGTC----- mirR 25 7
-----GTCTCACACAGAAATCGCACC----- mirR 21 6
-----GTCTCACACAGAAATCGCAC----- mirR 20 3
-----GTCTCACACAGAAATCGCACCCGT----- mirR 24 2
-----TGTCTCACACAGAAATCGCACC----- mirR 22 2
-----TGTCTCACACAGAAATCGCACCC----- mirR 23 1
-----GTCTCACACAGAAATCGCACCCG----- mirR 23 1
-----TCACCTTGGCCTGCTGAG----- morR 18 1
-----ACCTTGGCCTGCTGAGCACCACCAGAACCAAGAA morR 34 1

```

>mmu-mir-129-1

```

CAGCTGTCTCCTTTGGATCTTTTTGCGGTCTGGGCTTGCTGTTCTCTCGACAGTAGTCAGGAAGCCCTTACCCCAAAAAGTATCT species len reads
CAGCTGTCTCCTTTGGATC----- morL 19 1
-----CTTTTTGCGGTCTGGGCTTGC----- mirL 21 29883
-----CTTTTTGCGGTCTGGGCTTGCT----- mirL 22 7001
-----CTTTTTGCGGTCTGGGCTTG----- mirL 20 3392
-----CTTTTTGCGGTCTGGGCTT----- mirL 19 2827
-----CTTTTTGCGGTCTGGGCT----- mirL 18 856
-----TTTTTGCGGTCTGGGCTTGC----- mirL 20 35
-----TTTTTGCGGTCTGGGCTTGCTGT----- mirL 23 15
-----TTTTTGCGGTCTGGGCTTGCT----- mirL 21 14
-----TCTTTTTGCGGTCTGGGCTTGC----- mirL 22 11
-----TTTTGCGGTCTGGGCTTGC----- mirL 19 11
-----TTTTGCGGTCTGGGCTTGCTGT----- mirL 22 7

```

```

-----TTTTGCGGTCTGGGCTTGCT----- mirL 20 7
-----TTTTGCGGTCTGGGCTTGCTG----- mirL 22 7
-----TCTTTTTGCGGTCTGGGCTTG----- mirL 21 6
-----TTTGCGGTCTGGGCTTGCT----- mirL 19 5
-----TTTGCGGTCTGGGCTTGC----- mirL 18 5
-----TTTTGCGGTCTGGGCTTG----- mirL 19 5
-----ATCTTTTTGCGGTCTGGGCTTGC----- mirL 23 3
-----TTTTGCGGTCTGGGCTTG----- mirL 18 2
-----GATCTTTTTGCGGTCTGG----- mirL 18 1
-----TTTGCGGTCTGGGCTTGCTGT----- mirL 21 1
-----TCTTTTTGCGGTCTGGGCTT----- mirL 20 1
-----TTTTGCGGTCTGGGCTTGCTG----- mirL 21 1
-----ATCTTTTTGCGGTCTGGGC----- mirL 19 1
-----TGTTCTCTCGACAGTAGTCAGGA----- loop 23 1
-----AAGCCCTTACCCAAAAAGTATC----- mirR 23 30711
-----AAGCCCTTACCCAAAAAGTAT----- mirR 22 14307
-----AAGCCCTTACCCAAAAAGTA----- mirR 21 7691
-----AAGCCCTTACCCAAAAAG----- mirR 19 4624
-----AAGCCCTTACCCAAAAAGT----- mirR 20 2717
-----AAGCCCTTACCCAAAAA----- mirR 18 2399
-----AAGCCCTTACCCAAAAAGTATCT----- mirR 24 194
-----GAAGCCCTTACCCAAAAAGT----- mirR 21 66
-----AGCCCTTACCCAAAAAGTATC----- mirR 22 66
-----GAAGCCCTTACCCAAAAAGTATC----- mirR 24 59
-----GAAGCCCTTACCCAAAAAGTAT----- mirR 23 55
-----GGAAGCCCTTACCCAAAAAGTATC----- mirR 25 54
-----GAAGCCCTTACCCAAAAAGTA----- mirR 22 52
-----GGAAGCCCTTACCCAAAAAGT----- mirR 22 45
-----AGCCCTTACCCAAAAAGTAT----- mirR 21 43
-----GGAAGCCCTTACCCAAAA----- mirR 18 43
-----GGAAGCCCTTACCCAAAAAGTAT----- mirR 24 37
-----GAAGCCCTTACCCAAAA----- mirR 18 33
-----GAAGCCCTTACCCAAAA----- mirR 19 17
-----GGAAGCCCTTACCCAAAAAGTA----- mirR 23 16
-----GGAAGCCCTTACCCAAAA----- mirR 19 16
-----GGAAGCCCTTACCCAAAA----- mirR 20 13
-----GAAGCCCTTACCCAAAAAG----- mirR 20 11
-----AGCCCTTACCCAAAAAGT----- mirR 19 11
-----AGCCCTTACCCAAAAAG----- mirR 18 10
-----AGCCCTTACCCAAAAAGTATCT----- mirR 23 5
-----GCCCTTACCCAAAAAGTAT----- mirR 20 5
-----AGCCCTTACCCAAAAAGTA----- mirR 20 4
-----CCCTTACCCAAAAAGTAT----- mirR 19 3

```

>mmu-mir-101a

GTGACTGACAGGCTGCCCTGGCTCAGTTATCACAGTGCTGATGTGTCCATTCTAAAGGTACAGTACTGTGATAACTGAAGGAT species len reads

```
GTGACTGACAGGCTGCCCTGGCTC----- morL 24 2
-----TCAGTTATCACAGTGCTGATGC----- mirL 22 411
-----CAGTTATCACAGTGCTGATGC----- mirL 21 114
-----CAGTTATCACAGTGCTGATGCT----- mirL 22 98
-----TCAGTTATCACAGTGCTGATGCT----- mirL 23 83
-----TCAGTTATCACAGTGCTGAT----- mirL 20 66
-----TCAGTTATCACAGTGCTGATG----- mirL 21 53
-----TCAGTTATCACAGTGCTGA----- mirL 19 44
-----CAGTTATCACAGTGCTGAT----- mirL 19 22
-----CAGTTATCACAGTGCTGATG----- mirL 20 19
-----CAGTTATCACAGTGCTGA----- mirL 18 8
-----GGCTCAGTTATCACAGTG----- mirL 18 1
-----AGTTATCACAGTGCTGATGC----- mirL 20 1
-----GTTATCACAGTGCTGATGCTGTCC----- mirL 24 1
-----GTACAGTACTGTGATAAAGTGA----- mirR 21 42190
-----GTACAGTACTGTGATAAAGTGA----- mirR 22 17201
-----TACAGTACTGTGATAAAGTGA----- mirR 20 8630
-----TACAGTACTGTGATAAAGTGAAG----- mirR 22 8265
-----GTACAGTACTGTGATAAAGTGAAG----- mirR 23 6639
-----TACAGTACTGTGATAAAGTGA----- mirR 21 3988
-----GTACAGTACTGTGATAAAG----- mirR 18 3620
-----GTACAGTACTGTGATAAAGT----- mirR 20 3620
-----GTACAGTACTGTGATAAAG----- mirR 19 2904
-----TACAGTACTGTGATAAAGTGAAG----- mirR 23 1526
-----TACAGTACTGTGATAAAGT----- mirR 19 953
-----ACAGTACTGTGATAAAGTGA----- mirR 19 743
-----ACAGTACTGTGATAAAGTGAAG----- mirR 21 721
-----GTACAGTACTGTGATAAAGTGAAG----- mirR 24 634
-----TACAGTACTGTGATAAAGT----- mirR 18 396
-----ACAGTACTGTGATAAAGTGA----- mirR 20 339
-----TACAGTACTGTGATAAAGTGAAGGA----- mirR 24 189
-----ACAGTACTGTGATAAAGTGAAG----- mirR 22 170
-----ACAGTACTGTGATAAAGT----- mirR 18 55
-----ACAGTACTGTGATAAAGTGAAGGA----- mirR 23 39
-----CAGTACTGTGATAAAGTGA----- mirR 18 18
-----GGTACAGTACTGTGATAAAGTGA----- mirR 22 14
-----CAGTACTGTGATAAAGTGA----- mirR 19 13
-----CAGTACTGTGATAAAGTGAAG----- mirR 21 12
-----CAGTACTGTGATAAAGTGAAG----- mirR 20 10
-----GGTACAGTACTGTGATAAAGTGA----- mirR 23 7
-----CAGTACTGTGATAAAGTGAAGGA----- mirR 22 5
-----GGTACAGTACTGTGATAAAGTGAAG----- mirR 24 3
-----AGGTACAGTACTGTGATAAAGTGA----- mirR 23 3
-----GGTACAGTACTGTGATAAAGT----- mirR 21 2
-----ACAGTACTGTGATAAAGTGAAGGAT----- mirR 24 2
-----GGTACAGTACTGTGATAAAG----- mirR 19 2
```

```
-----AGGTACAGTACTGTGATAACT----- mirR 21 1
-----GGTACAGTACTGTGATAACT----- mirR 20 1
-----GGTACAGTACTGTGATAA----- mirR 18 1
-----AGGTACAGTACTGTGATAA----- mirR 19 1
```

>mmu-mir-150

```
GACTCTTCTCAATGCCCTGTCTCCCAACCCTTGTACCAGTGTCTGCCTCAGACCCTGGTACAGGCCTGGGGGATAGGGACTTGGGAACCCAGCAGCA species len reads
- ACTCTTCTCAATGCCCTG----- morL 18 4
GACTCTTCTCAATGCCCTG----- morL 19 1
-----TCTCCCAACCCTTGTACCAGTGC----- mirL 23 49249
-----TCTCCCAACCCTTGTACCAGT----- mirL 21 18862
-----TCTCCCAACCCTTGTACCAGTG----- mirL 22 14007
-----TCTCCCAACCCTTGTACC----- mirL 18 7913
-----TCTCCCAACCCTTGTACCA----- mirL 19 5758
-----CTCCCAACCCTTGTACCAGTG----- mirL 21 2271
-----CTCCCAACCCTTGTACCAGTGC----- mirL 22 1060
-----CTCCCAACCCTTGTACCAGT----- mirL 20 866
-----CTCCCAACCCTTGTACCAG----- mirL 19 350
-----CTCCCAACCCTTGTACCA----- mirL 18 201
-----TCCCAACCCTTGTACCAGTG----- mirL 20 18
-----CCCAACCCTTGTACCAGTGC----- mirL 20 9
-----TCCCAACCCTTGTACCAGTGC----- mirL 21 7
-----CCCAACCCTTGTACCAGTG----- mirL 19 5
-----GTCTCCCAACCCTTGTACCAGTG----- mirL 23 3
-----GTCTCCCAACCCTTGTACCAGT----- mirL 22 3
-----TCCCAACCCTTGTACCAGT----- mirL 19 3
-----GTCTCCCAACCCTTGTACCAGTGC----- mirL 24 3
-----CCCAACCCTTGTACCAGT----- mirL 18 2
-----TCCCAACCCTTGTACCAGTGCT----- mirL 22 1
-----GTCTCCCAACCCTTGTACC----- mirL 19 1
-----GTCTCCCAACCCTTGTACCAG----- mirL 21 1
-----TGTCTCCCAACCCTTGTACCAGTG----- mirL 24 1
-----TGCCTCAGACCCTGGTACAG----- loop 20 3
-----AGGCCTGGGGGATAGGGACT----- mirR 20 20
-----GGCCTGGGGGATAGGGACT----- mirR 19 2
-----AGGCCTGGGGGATAGGGAC----- mirR 19 1
-----CTTGGGAACCCAGCAGCA morR 19 1
```

>mmu-mir-7a-1

```
TGTGGAAGACTAGTGATTTTGTGTTTGTAGATAACTAAAACGACAACAATACACAGTCTGCCATATGGCACAGGCCACCTCTACA species len reads
--TGGAAGACTAGTGATTTTGTGTT----- mirL 24 22925
--TGGAAGACTAGTGATTTTGTGTTT----- mirL 25 21422
--TGGAAGACTAGTGATTTTGTGTT----- mirL 23 16138
--TGGAAGACTAGTGATTTTGT----- mirL 20 10980
--TGGAAGACTAGTGATTTTGTG----- mirL 22 5114
--GGAAGACTAGTGATTTTGTGTT----- mirL 23 2342
```

```

---GGAAGACTAGTGATTTTGTGTT----- mirL 22 816
---GGAAGACTAGTGATTTTGT----- mirL 19 510
---GGAAGACTAGTGATTTTGTG----- mirL 21 217
---GGAAGACTAGTGATTTTGT----- mirL 20 109
---GAAGACTAGTGATTTTGTGTT----- mirL 22 33
-GTGGAAGACTAGTGATTTTGTGTT----- mirL 25 9
-----AAGACTAGTGATTTTGTGTT----- mirL 21 5
---GAAGACTAGTGATTTTGTGTT----- mirL 21 4
-GTGGAAGACTAGTGATTTTGT----- mirL 22 3
---GAAGACTAGTGATTTTGTGTT----- mirL 23 1
-GTGGAAGACTAGTGATTTTGTGTT----- mirL 24 1
-----AAGACTAGTGATTTTGTGTT----- mirL 20 1
-GTGGAAGACTAGTGATTTT----- mirL 19 1
---AAGACTAGTGATTTTGTGTTT----- mirL 25 1
---GAAGACTAGTGATTTTGT----- mirL 19 1
TGTGGAAGACTAGTGATTTTGTG----- mirL 24 1
-----TTTTAGATAACTAAAACG----- loop 19 1
-----TTTAGATAACTAAAACGA----- loop 18 1
-----CAACAAATCACAGTCTGCCATA----- mirR 22 4803
-----CAACAAATCACAGTCTGCCAT----- mirR 21 4451
-----CAACAAATCACAGTCTGCC----- mirR 19 1759
-----CAACAAATCACAGTCTGC----- mirR 18 1047
-----AACAAATCACAGTCTGCCATA----- mirR 21 736
-----CAACAAATCACAGTCTGCCA----- mirR 20 571
-----AACAAATCACAGTCTGCCAT----- mirR 20 478
-----CAACAAATCACAGTCTGCCATAT----- mirR 23 405
-----AACAAATCACAGTCTGCCATAT----- mirR 22 139
-----AACAAATCACAGTCTGCC----- mirR 18 117
-----AACAAATCACAGTCTGCCA----- mirR 19 92
-----ACAAATCACAGTCTGCCATAT----- mirR 21 52
-----GACAACAAATCACAGTCTGCCAT----- mirR 23 45
-----GACAACAAATCACAGTCTGCC----- mirR 21 43
-----GACAACAAATCACAGTCTGC----- mirR 20 38
-----CAACAAATCACAGTCTGCCATATGG----- mirR 25 23
-----GACAACAAATCACAGTCTGCCA----- mirR 22 19
-----ACAAATCACAGTCTGCCATA----- mirR 20 18
-----CGACAACAAATCACAGTCTGCC----- mirR 22 16
-----CGACAACAAATCACAGTC----- mirR 18 12
-----CGACAACAAATCACAGTCTGC----- mirR 21 10
-----ACAACAAATCACAGTCTGCC----- mirR 20 6
-----AACAAATCACAGTCTGCCATATG----- mirR 23 5
-----ACAAATCACAGTCTGCCAT----- mirR 19 5
-----GACAACAAATCACAGTCTGCCATA----- mirR 24 3
-----ACAACAAATCACAGTCTGCCA----- mirR 21 3
-----CGACAACAAATCACAGTCTGCCA----- mirR 23 3
-----GACAACAAATCACAGTCTG----- mirR 19 3

```

```

-----ACAAATCACAGTCTGCCA----- mirR 18 2
-----GACAACAAATCACAGTCT----- mirR 18 2
-----CAAATCACAGTCTGCCATAT----- mirR 20 2
-----ACAAATCACAGTCTGCCATATG----- mirR 22 1
-----CAAATCACAGTCTGCCAT----- mirR 18 1
-----ACAACAAATCACAGTCTGCCATA----- mirR 23 1
-----AACAAATCACAGTCTGCCATATGGC----- mirR 25 1
-----CGACAACAAATCACAGTCTGCCAT----- mirR 24 1
-----ACAACAAATCACAGTCTGC----- mirR 19 1
-----GGCACAGGCCACCTCTACA morR 19 1

```

>mmu-mir-222

```

TAGGGTGCCCTCAGTGGCTCAGTAGCCAGTGTAGATCCTGTCTTTGGTAATCAGCAGCTACATCTGGCTACTGGGTCTCTGGTGGCATCATC species len reads
TAGGGTGCCCTCAGTGGC----- morL 18 3
-AGGGTGCCCTCAGTGGCT----- morL 18 1
-----TCAGTAGCCAGTGTAGATCCTGTCT----- mirL 24 76
-----TCAGTAGCCAGTGTAGATCCT----- mirL 21 67
-----TCAGTAGCCAGTGTAGATCCTGT----- mirL 23 62
-----TCAGTAGCCAGTGTAGATCCTG----- mirL 22 30
-----TCAGTAGCCAGTGTAGATCC----- mirL 20 24
-----CTCAGTAGCCAGTGTAGATCC----- mirL 21 9
-----GGCTCAGTAGCCAGTGTAGATCC----- mirL 23 9
-----CTCAGTAGCCAGTGTAGATCCT----- mirL 22 8
-----CAGTAGCCAGTGTAGATCCTGT----- mirL 22 8
-----GGCTCAGTAGCCAGTGTAGAT----- mirL 21 8
-----CAGTAGCCAGTGTAGATCCTG----- mirL 21 4
-----CAGTAGCCAGTGTAGATCCTGTCT----- mirL 23 3
-----CTCAGTAGCCAGTGTAGATCCTG----- mirL 23 3
-----GGCTCAGTAGCCAGTGTAGATC----- mirL 22 3
-----GGCTCAGTAGCCAGTGTAGA----- mirL 20 3
-----GGCTCAGTAGCCAGTGTAGATCCT----- mirL 24 2
-----CAGTAGCCAGTGTAGATCCTGTCT----- mirL 24 2
-----CTCAGTAGCCAGTGTAGAT----- mirL 19 1
-----CAGTAGCCAGTGTAGATCCT----- mirL 20 1
-----CTCAGTAGCCAGTGTAGATCCTGT----- mirL 24 1
-----TCTTTGGTAATCAGCAG----- loop 18 2
-----AGCTACATCTGGCTACTGGGT----- mirR 21 29539
-----AGCTACATCTGGCTACTGGGTC----- mirR 22 29002
-----AGCTACATCTGGCTACTGGGTCT----- mirR 23 9887
-----AGCTACATCTGGCTACTGGGTCTC----- mirR 24 9827
-----AGCTACATCTGGCTACTGG----- mirR 19 7109
-----AGCTACATCTGGCTACTGGG----- mirR 20 3361
-----AGCTACATCTGGCTACTGGGTCTCT----- mirR 25 1577
-----GCAGCTACATCTGGCTACTGGGTC----- mirR 24 461
-----CAGCTACATCTGGCTACTGGGTC----- mirR 23 447
-----GCAGCTACATCTGGCTACTGGGT----- mirR 23 391

```

```

-----GCAGCTACATCTGGCTACTGGG----- mirR 22 242
-----CAGCTACATCTGGCTACTGG----- mirR 20 193
-----CAGCTACATCTGGCTACTGGGT----- mirR 22 178
-----GCAGCTACATCTGGCTACT----- mirR 19 134
-----GCAGCTACATCTGGCTACTGG----- mirR 21 116
-----CAGCTACATCTGGCTACTGGG----- mirR 21 109
-----GCAGCTACATCTGGCTAC----- mirR 18 106
-----CAGCTACATCTGGCTACTGGGTCT----- mirR 24 59
-----GCAGCTACATCTGGCTACTG----- mirR 20 51
-----CTACATCTGGCTACTGGGTCT----- mirR 21 49
-----CTACATCTGGCTACTGGGTCTC----- mirR 22 37
-----CAGCTACATCTGGCTACTG----- mirR 19 33
-----GCTACATCTGGCTACTGGGTCTC----- mirR 23 30
-----GCTACATCTGGCTACTGGGT----- mirR 20 30
-----CAGCTACATCTGGCTACT----- mirR 18 20
-----GCTACATCTGGCTACTGGGTCT----- mirR 21 18
-----GCTACATCTGGCTACTGGGTCT----- mirR 22 15
-----CTACATCTGGCTACTGGGTCT----- mirR 20 13
-----TACATCTGGCTACTGGGTCT----- mirR 20 13
-----CTACATCTGGCTACTGGGTCTCT----- mirR 23 11
-----CTACATCTGGCTACTGGGT----- mirR 19 10
-----TACATCTGGCTACTGGGT----- mirR 18 7
-----GCTACATCTGGCTACTGGG----- mirR 19 6
-----CTACATCTGGCTACTGGG----- mirR 18 4
-----GCTACATCTGGCTACTGGGTCTCT----- mirR 24 3
-----TACATCTGGCTACTGGGTCT----- mirR 19 2
-----GCTACATCTGGCTACTGG----- mirR 18 2
-----TACATCTGGCTACTGGGTCTC----- mirR 21 2
-----CTACATCTGGCTACTGGGTCTCTG----- mirR 24 2
-----AGCAGCTACATCTGGCTA----- mirR 18 1
-----TACATCTGGCTACTGGGTCTCTG----- mirR 23 1
-----AGCAGCTACATCTGGCTAC----- mirR 19 1
-----TACATCTGGCTACTGGGTCTCT----- mirR 22 1
-----AGCAGCTACATCTGGCTACTGGGTCT----- mirR 25 1
-----GTCTCTGGTGGCATCATC morR 18 1

```

>mmu-mir-219-2

| Sequence                                                                                                                | Species | Len | Reads |
|-------------------------------------------------------------------------------------------------------------------------|---------|-----|-------|
| TGAACTCAGGGGCTTCGCCACTGATTGTCCAAACGCAATTCTTGTACGAGTCTGCGGCCAACCCGAGAATTGTGGCTGGACATCTGTGGTTGAGCTCCGGGCTCTACAGAGACGAGGTC | morL    | 19  | 5     |
| --AACTCAGGGGCTTCGCCAC-----                                                                                              | morL    | 20  | 3     |
| -GAACTCAGGGGCTTCGCCAC-----                                                                                              | morL    | 18  | 1     |
| -----CAGGGGCTTCGCCACTGA-----                                                                                            | morL    | 18  | 1     |
| TGAACTCAGGGGCTTCGC-----                                                                                                 | morL    | 18  | 1     |
| ---ACTCAGGGGCTTCGCCAC-----                                                                                              | morL    | 18  | 1     |
| -----TGATTGTCCAAACGCAATTCTT-----                                                                                        | mirL    | 22  | 2849  |
| -----TGATTGTCCAAACGCAATTCTTG-----                                                                                       | mirL    | 23  | 1519  |
| -----TGATTGTCCAAACGCAATTCT-----                                                                                         | mirL    | 21  | 1267  |



|                                     |               |
|-------------------------------------|---------------|
| -----TGATTGTCCAAACGCAATTC-----      | mirL 20 1040  |
| -----TGATTGTCCAAACGCAATT-----       | mirL 19 874   |
| -----GATTGTCCAAACGCAATTCTTG-----    | mirL 22 222   |
| -----GATTGTCCAAACGCAATTCTT-----     | mirL 21 192   |
| -----GATTGTCCAAACGCAATTCT-----      | mirL 20 120   |
| -----GATTGTCCAAACGCAATTC-----       | mirL 19 87    |
| -----GATTGTCCAAACGCAATT-----        | mirL 18 87    |
| -----ATTGTCCAAACGCAATTCTTGT-----    | mirL 22 2     |
| -----TTGTCCAAACGCAATTCTTG-----      | mirL 20 2     |
| -----ACTGATTGTCCAAACGCAATTC-----    | mirL 22 1     |
| -----CTGATTGTCCAAACGCAAT-----       | mirL 19 1     |
| -----ATTGTCCAAACGCAATTCTTG-----     | mirL 21 1     |
| -----TACGAGTCTGCGGCCAACC GA-----    | loop 21 32    |
| -----TACGAGTCTGCGGCCAAC-----        | loop 18 25    |
| -----TACGAGTCTGCGGCCAACC-----       | loop 19 18    |
| -----TACGAGTCTGCGGCCAACC GAG-----   | loop 22 12    |
| -----TACGAGTCTGCGGCCAACC G-----     | loop 20 9     |
| -----TACGAGTCTGCGGCCAACC GAGA-----  | loop 23 5     |
| -----ACGAGTCTGCGGCCAACC GA-----     | loop 20 4     |
| -----ACGAGTCTGCGGCCAACC-----        | loop 18 3     |
| -----ACGAGTCTGCGGCCAACC GAG-----    | loop 21 1     |
| -----AGAATTGTGGCTGGACATCTGT-----    | mirR 22 54441 |
| -----AGAATTGTGGCTGGACATCTG-----     | mirR 21 10902 |
| -----AGAATTGTGGCTGGACATC-----       | mirR 19 5260  |
| -----AGAATTGTGGCTGGACATCT-----      | mirR 20 2987  |
| -----AGAATTGTGGCTGGACATCTGTG-----   | mirR 23 2766  |
| -----AGAATTGTGGCTGGACATCTGTGG-----  | mirR 24 788   |
| -----AGAATTGTGGCTGGACAT-----        | mirR 18 451   |
| -----GAGAATTGTGGCTGGACATCT-----     | mirR 21 285   |
| -----GAGAATTGTGGCTGGACATCTG-----    | mirR 22 211   |
| -----GAGAATTGTGGCTGGACATCTGT-----   | mirR 23 197   |
| -----GAATTGTGGCTGGACATCTGT-----     | mirR 21 83    |
| -----GAGAATTGTGGCTGGACATC-----      | mirR 20 79    |
| -----GAATTGTGGCTGGACATCTG-----      | mirR 20 26    |
| -----GAGAATTGTGGCTGGACAT-----       | mirR 19 17    |
| -----AATTGTGGCTGGACATCTGT-----      | mirR 20 12    |
| -----GAATTGTGGCTGGACATCTGTG-----    | mirR 22 11    |
| -----ATTGTGGCTGGACATCTGT-----       | mirR 19 10    |
| -----GAATTGTGGCTGGACATCTGTGG-----   | mirR 23 9     |
| -----GAGAATTGTGGCTGGACA-----        | mirR 18 4     |
| -----ATTGTGGCTGGACATCTGTG-----      | mirR 20 4     |
| -----ATTGTGGCTGGACATCTG-----        | mirR 18 3     |
| -----GAATTGTGGCTGGACATCT-----       | mirR 19 3     |
| -----GAGAATTGTGGCTGGACATCTGTGG----- | mirR 25 3     |
| -----AATTGTGGCTGGACATCTG-----       | mirR 19 3     |
| -----GAATTGTGGCTGGACATC-----        | mirR 18 2     |

```

-----AATTGTGGCTGGACATCTGTG----- mirR 21 2
-----GGTTGAGCTCCGGGCTCTACAGAGACGAGGTC morR 32 2
-----GGTTGAGCTCCGGGCTCTACAGAGACGAG--- morR 29 1
-----GGTTGAGCTCCGGGCTCTACAGAGACG----- morR 27 1
-----GGTTGAGCTCCGGGCTCTACAGAGA----- morR 25 1

```

>mmu-mir-7a-2

| Species | len | reads |
|---------|-----|-------|
| morL    | 18  | 4     |
| mirL    | 24  | 22926 |
| mirL    | 25  | 21079 |
| mirL    | 23  | 16138 |
| mirL    | 20  | 10980 |
| mirL    | 22  | 5114  |
| mirL    | 23  | 2342  |
| mirL    | 22  | 816   |
| mirL    | 19  | 510   |
| mirL    | 21  | 217   |
| mirL    | 20  | 109   |
| mirL    | 22  | 33    |
| mirL    | 25  | 18    |
| mirL    | 21  | 5     |
| mirL    | 21  | 4     |
| mirL    | 24  | 3     |
| mirL    | 22  | 2     |
| mirL    | 19  | 1     |
| mirL    | 23  | 1     |
| mirL    | 20  | 1     |
| mirL    | 18  | 1     |
| mirL    | 24  | 1     |
| mirL    | 21  | 1     |
| mirR    | 22  | 2770  |
| mirR    | 21  | 1408  |
| mirR    | 23  | 447   |
| mirR    | 20  | 397   |
| mirR    | 19  | 298   |
| mirR    | 18  | 173   |
| mirR    | 21  | 81    |
| mirR    | 22  | 38    |
| mirR    | 20  | 28    |
| mirR    | 24  | 25    |
| mirR    | 22  | 19    |
| mirR    | 19  | 15    |
| mirR    | 20  | 11    |
| mirR    | 21  | 9     |
| mirR    | 23  | 6     |

```
-----ACAACAAGTCCCAGTCTGC----- mirR 19 5
-----AACAAGTCCCAGTCTGCC----- mirR 18 4
-----AACAAGTCCCAGTCTGCCACATG----- mirR 23 3
-----ACAACAAGTCCCAGTCTGCCACAT----- mirR 24 2
-----GGTGCTGGTCATTTTCAGC morR 18 1
```

>mmu-mir-484

| TCGCGGCCCTGCAGCCTCGTCAGGCTCAGTCCCCTCCCGATAAACCTCAAATAGGGTCTTACCTAGGGGGCTGGCGGCGTATTTTTTTTAGCAGGAACCCAG | species | len | reads |
|--------------------------------------------------------------------------------------------------------|---------|-----|-------|
| TCGCGGCCCTGCAGCCTCGTCA-----                                                                            | morL    | 22  | 2     |
| -----TCAGGCTCAGTCCCCTCCCGAT-----                                                                       | mirL    | 22  | 40719 |
| -----TCAGGCTCAGTCCCCTCC-----                                                                           | mirL    | 18  | 12530 |
| -----TCAGGCTCAGTCCCCTCCC-----                                                                          | mirL    | 19  | 11494 |
| -----TCAGGCTCAGTCCCCTCCCGA-----                                                                        | mirL    | 21  | 8708  |
| -----TCAGGCTCAGTCCCCTCCCGATA-----                                                                      | mirL    | 23  | 7695  |
| -----CAGGCTCAGTCCCCTCCCGAT-----                                                                        | mirL    | 21  | 2113  |
| -----CAGGCTCAGTCCCCTCCCGATA-----                                                                       | mirL    | 22  | 539   |
| -----CAGGCTCAGTCCCCTCCCGA-----                                                                         | mirL    | 20  | 507   |
| -----CAGGCTCAGTCCCCTCCC-----                                                                           | mirL    | 18  | 383   |
| -----CAGGCTCAGTCCCCTCCCG-----                                                                          | mirL    | 19  | 232   |
| -----GTCAGGCTCAGTCCCCTCCCGAT-----                                                                      | mirL    | 23  | 15    |
| -----AGGCTCAGTCCCCTCCCGAT-----                                                                         | mirL    | 20  | 15    |
| -----GGCTCAGTCCCCTCCCGAT-----                                                                          | mirL    | 19  | 5     |
| -----GTCAGGCTCAGTCCCCTCCC-----                                                                         | mirL    | 20  | 5     |
| -----GTCAGGCTCAGTCCCCTCC-----                                                                          | mirL    | 19  | 5     |
| -----TCGTCAGGCTCAGTCCCCTCC-----                                                                        | mirL    | 21  | 4     |
| -----GGCTCAGTCCCCTCCCGA-----                                                                           | mirL    | 18  | 3     |
| -----AGGCTCAGTCCCCTCCCGATA-----                                                                        | mirL    | 21  | 3     |
| -----GGCTCAGTCCCCTCCCGATA-----                                                                         | mirL    | 20  | 2     |
| -----CGTCAGGCTCAGTCCCCTCC-----                                                                         | mirL    | 20  | 2     |
| -----GTCAGGCTCAGTCCCCTCCCGA-----                                                                       | mirL    | 22  | 2     |
| -----CGTCAGGCTCAGTCCCCTCCCG-----                                                                       | mirL    | 22  | 2     |
| -----AGGCTCAGTCCCCTCCCGA-----                                                                          | mirL    | 19  | 2     |
| -----CGTCAGGCTCAGTCCCCT-----                                                                           | mirL    | 18  | 1     |
| -----GTCAGGCTCAGTCCCCTCCCG-----                                                                        | mirL    | 21  | 1     |
| -----AGGCTCAGTCCCCTCCCGATA-----                                                                        | mirL    | 22  | 1     |
| -----CGTCAGGCTCAGTCCCCTC-----                                                                          | mirL    | 19  | 1     |
| -----GGGGCTGGCGGCGTATTT-----                                                                           | mirR    | 18  | 13    |
| -----GGGGCTGGCGGCGTATTTT-----                                                                          | mirR    | 20  | 4     |
| -----GGGGCTGGCGGCGTATTT-----                                                                           | mirR    | 20  | 1     |
| -----GGGGCTGGCGGCGTATTT-----                                                                           | mirR    | 19  | 1     |
| -----GGGGCTGGCGGCGTATTT-----                                                                           | mirR    | 19  | 1     |
| -----GGGGCTGGCGGCGTAT-----                                                                             | mirR    | 18  | 1     |
| -----GGGGCTGGCGGCGTATTTT-----                                                                          | mirR    | 21  | 1     |
| -----TTTTTAGCAGGAACCCAG morR 19 1                                                                      | morR    | 19  | 1     |
| -----TTTTTTTAGCAGGAACC----- morR 18 1                                                                  | morR    | 18  | 1     |

>mmu-mir-154

| AGATGCTGGTACCCACGTGCGGTGCTTGAAGATAGGTTATCCGTGTTGCCTTCGCTTTATTCGTGACGAATCATACACGGTTGACCTATTTT<br>AGATGCTGGTACCCACGTGCGGTGCTTGAAGA----- | species | len | reads |
|---------------------------------------------------------------------------------------------------------------------------------------|---------|-----|-------|
| -----TAGGTTATCCGTGTTGCCTTCG-----                                                                                                      | mirL    | 22  | 20343 |
| -----TAGGTTATCCGTGTTGCCTTC-----                                                                                                       | mirL    | 21  | 19188 |
| -----TAGGTTATCCGTGTTGCCTTC-----                                                                                                       | mirL    | 20  | 6210  |
| -----TAGGTTATCCGTGTTGCCTTC-----                                                                                                       | mirL    | 19  | 5083  |
| -----TAGGTTATCCGTGTTGCCTTCG-----                                                                                                      | mirL    | 23  | 3907  |
| -----AGGTTATCCGTGTTGCCTTCG-----                                                                                                       | mirL    | 21  | 1060  |
| -----AGGTTATCCGTGTTGCCTTC-----                                                                                                        | mirL    | 20  | 494   |
| -----AGGTTATCCGTGTTGCCTTC-----                                                                                                        | mirL    | 19  | 229   |
| -----AGGTTATCCGTGTTGCCTTCG-----                                                                                                       | mirL    | 22  | 133   |
| -----AGGTTATCCGTGTTGCCTTC-----                                                                                                        | mirL    | 18  | 70    |
| -----GGTTATCCGTGTTGCCTTCG-----                                                                                                        | mirL    | 20  | 7     |
| -----ATAGGTTATCCGTGTTGCCTTC-----                                                                                                      | mirL    | 22  | 6     |
| -----GTTATCCGTGTTGCCTTCG-----                                                                                                         | mirL    | 19  | 3     |
| -----GGTTATCCGTGTTGCCTTC-----                                                                                                         | mirL    | 19  | 3     |
| -----ATAGGTTATCCGTGTTGCC-----                                                                                                         | mirL    | 19  | 3     |
| -----ATAGGTTATCCGTGTTGCCTTCG-----                                                                                                     | mirL    | 23  | 2     |
| -----GATAGGTTATCCGTGTTGCCTTC-----                                                                                                     | mirL    | 23  | 1     |
| -----AGATAGGTTATCCGTGTTGC-----                                                                                                        | mirL    | 20  | 1     |
| -----GATAGGTTATCCGTGTTGCC-----                                                                                                        | mirL    | 20  | 1     |
| -----ATAGGTTATCCGTGTTGCCTTC-----                                                                                                      | mirL    | 21  | 1     |
| -----AATCATACACGGTTGACC-----                                                                                                          | mirR    | 18  | 15694 |
| -----AATCATACACGGTTGACCTATT--                                                                                                         | mirR    | 22  | 9446  |
| -----AATCATACACGGTTGACCTAT--                                                                                                          | mirR    | 21  | 1089  |
| -----AATCATACACGGTTGACCTATTT--                                                                                                        | mirR    | 23  | 849   |
| -----AATCATACACGGTTGACCT--                                                                                                            | mirR    | 19  | 615   |
| -----AATCATACACGGTTGACCTA--                                                                                                           | mirR    | 20  | 415   |
| -----ATCATAACACGGTTGACCTATT--                                                                                                         | mirR    | 21  | 45    |
| -----AATCATACACGGTTGACCTATTTT                                                                                                         | mirR    | 24  | 25    |
| -----CATACACGGTTGACCTATT--                                                                                                            | mirR    | 19  | 16    |
| -----GAATCATACACGGTTGACC-----                                                                                                         | mirR    | 19  | 9     |
| -----TCATAACACGGTTGACCTATT--                                                                                                          | mirR    | 20  | 8     |
| -----ATCATAACACGGTTGACCTATTT--                                                                                                        | mirR    | 22  | 8     |
| -----GAATCATACACGGTTGACCTAT--                                                                                                         | mirR    | 22  | 8     |
| -----ATCATAACACGGTTGACCTA--                                                                                                           | mirR    | 19  | 3     |
| -----GAATCATACACGGTTGACCTATT--                                                                                                        | mirR    | 23  | 3     |
| -----ACGAATCATACACGGTTGACCT--                                                                                                         | mirR    | 22  | 2     |
| -----ATCATAACACGGTTGACCT--                                                                                                            | mirR    | 18  | 2     |
| -----TCATAACACGGTTGACCTA--                                                                                                            | mirR    | 18  | 2     |
| -----ATCATAACACGGTTGACCTAT--                                                                                                          | mirR    | 20  | 2     |
| -----GAATCATACACGGTTGACCTA--                                                                                                          | mirR    | 21  | 1     |
| -----ACGAATCATACACGGTTGACCTATT--                                                                                                      | mirR    | 25  | 1     |
| -----TCATAACACGGTTGACCTATTT--                                                                                                         | mirR    | 21  | 1     |

>mmu-mir-21

| ATCGCATGGCTGTACCACCTTGTCGGATAGCTTATCAGACTGATGTTGACTGTTGAATCTCATGGCAACAGCAGTCGATGGGCTGTCTGAC | species | len | reads |
|---------------------------------------------------------------------------------------------|---------|-----|-------|
| ATCGCATGGCTGTACCACCTTGTCGGA-----                                                            | morL    | 27  | 1     |
| -----TAGCTTATCAGACTGATGTTGAC-----                                                           | mirL    | 23  | 56214 |
| -----TAGCTTATCAGACTGATGTTGA-----                                                            | mirL    | 22  | 7917  |
| -----TAGCTTATCAGACTGATGTTG-----                                                             | mirL    | 21  | 7535  |
| -----TAGCTTATCAGACTGATGTT-----                                                              | mirL    | 20  | 4133  |
| -----AGCTTATCAGACTGATGTTGAC-----                                                            | mirL    | 22  | 4020  |
| -----TAGCTTATCAGACTGATGT-----                                                               | mirL    | 19  | 2263  |
| -----AGCTTATCAGACTGATGTTGA-----                                                             | mirL    | 21  | 764   |
| -----AGCTTATCAGACTGATGTTG-----                                                              | mirL    | 20  | 713   |
| -----AGCTTATCAGACTGATGTT-----                                                               | mirL    | 19  | 173   |
| -----ATAGCTTATCAGACTGATGTTGAC-----                                                          | mirL    | 24  | 153   |
| -----AGCTTATCAGACTGATGT-----                                                                | mirL    | 18  | 105   |
| -----ATAGCTTATCAGACTGATGTTGA-----                                                           | mirL    | 23  | 55    |
| -----ATAGCTTATCAGACTGATGTTG-----                                                            | mirL    | 22  | 23    |
| -----ATAGCTTATCAGACTGATGTT-----                                                             | mirL    | 21  | 15    |
| -----GCTTATCAGACTGATGTTGAC-----                                                             | mirL    | 21  | 8     |
| -----CTTATCAGACTGATGTTGAC-----                                                              | mirL    | 20  | 8     |
| -----ATAGCTTATCAGACTGATGT-----                                                              | mirL    | 20  | 7     |
| -----GCTTATCAGACTGATGTTG-----                                                               | mirL    | 19  | 4     |
| -----GCTTATCAGACTGATGTTGA-----                                                              | mirL    | 20  | 2     |
| -----GATAGCTTATCAGACTGATG-----                                                              | mirL    | 20  | 2     |
| -----CTTATCAGACTGATGTTG-----                                                                | mirL    | 18  | 1     |
| -----GCTTATCAGACTGATGTTGACT-----                                                            | mirL    | 22  | 1     |
| -----CTTATCAGACTGATGTTGACT-----                                                             | mirL    | 21  | 1     |
| -----GGATAGCTTATCAGACTGA-----                                                               | mirL    | 19  | 1     |
| -----GCTTATCAGACTGATGTT-----                                                                | mirL    | 18  | 1     |
| -----CTTATCAGACTGATGTTGACTG-----                                                            | mirL    | 22  | 1     |
| -----CAACAGCAGTCGATGGGCTGTC-----                                                            | mirR    | 22  | 137   |
| -----CAACAGCAGTCGATGGGCTGTCT-----                                                           | mirR    | 23  | 58    |
| -----AACAGCAGTCGATGGGCTGTCT-----                                                            | mirR    | 22  | 46    |
| -----CAACAGCAGTCGATGGGC-----                                                                | mirR    | 18  | 40    |
| -----ACAGCAGTCGATGGGCTGTCT-----                                                             | mirR    | 21  | 37    |
| -----CAACAGCAGTCGATGGGCTGT-----                                                             | mirR    | 21  | 31    |
| -----CAACAGCAGTCGATGGGCTG-----                                                              | mirR    | 20  | 19    |
| -----CAACAGCAGTCGATGGGCT-----                                                               | mirR    | 19  | 14    |
| -----CAACAGCAGTCGATGGGCTGTCTG-----                                                          | mirR    | 24  | 12    |
| -----AACAGCAGTCGATGGGCTGTC-----                                                             | mirR    | 21  | 7     |
| -----AACAGCAGTCGATGGGCTGTCTG-----                                                           | mirR    | 23  | 5     |
| -----AACAGCAGTCGATGGGCTG-----                                                               | mirR    | 19  | 4     |
| -----ACAGCAGTCGATGGGCTGTCTG-----                                                            | mirR    | 22  | 4     |
| -----ACAGCAGTCGATGGGCTGT-----                                                               | mirR    | 19  | 3     |
| -----ACAGCAGTCGATGGGCTGTC-----                                                              | mirR    | 20  | 3     |
| -----TGGCAACAGCAGTCGATGGG-----                                                              | mirR    | 20  | 2     |
| -----AACAGCAGTCGATGGGCTGT-----                                                              | mirR    | 20  | 2     |

```

-----ACAGCAGTCGATGGGCTGTCTGA- mirR 23 2
-----ACAGCAGTCGATGGGCTGTCTGAC mirR 24 2
-----GGCAACAGCAGTCGATGGGCTGTC---- mirR 24 1
-----TGGCAACAGCAGTCGATGGGC----- mirR 21 1
-----GCAACAGCAGTCGATGGGCTGTC---- mirR 23 1

```

>mmu-mir-92b

| sequence                                                                       | species | len | reads |
|--------------------------------------------------------------------------------|---------|-----|-------|
| AGGGACGGGACGTGGTGCACTGTTGTTCTTTCCCTGCCAATATGCACTCGTCCCGGCCTCCGGCCCCCTCGGCCCCCC | mirL    | 23  | 115   |
| AGGGACGGGACGTGGTGCACTGTTGTTCTTTCCCTGCCAATATGCACTCGTCCCGGCCTCCGGCCCCCTCGGCCCCCC | mirL    | 25  | 114   |
| AGGGACGGGACGTGGTGCACTGTTGTTCTTTCCCTGCCAATATGCACTCGTCCCGGCCTCCGGCCCCCTCGGCCCCCC | mirL    | 19  | 53    |
| AGGGACGGGACGTGGTGCACTGTTGTTCTTTCCCTGCCAATATGCACTCGTCCCGGCCTCCGGCCCCCTCGGCCCCCC | mirL    | 24  | 49    |
| AGGGACGGGACGTGGTGCACTGTTGTTCTTTCCCTGCCAATATGCACTCGTCCCGGCCTCCGGCCCCCTCGGCCCCCC | mirL    | 20  | 45    |
| ---GACGGGACGTGGTGCACTGTTGTTCTTTCCCTGCCAATATGCACTCGTCCCGGCCTCCGGCCCCCTCGGCCCCCC | mirL    | 22  | 22    |
| ---GACGGGACGTGGTGCACTGTTGTTCTTTCCCTGCCAATATGCACTCGTCCCGGCCTCCGGCCCCCTCGGCCCCCC | mirL    | 23  | 4     |
| ---GACGGGACGTGGTGCACTGTTGTTCTTTCCCTGCCAATATGCACTCGTCCCGGCCTCCGGCCCCCTCGGCCCCCC | mirL    | 24  | 3     |
| ---GACGGGACGTGGTGCACTGTTGTTCTTTCCCTGCCAATATGCACTCGTCCCGGCCTCCGGCCCCCTCGGCCCCCC | mirL    | 23  | 3     |
| ---GACGGGACGTGGTGCACTGTTGTTCTTTCCCTGCCAATATGCACTCGTCCCGGCCTCCGGCCCCCTCGGCCCCCC | mirL    | 21  | 2     |
| ---GACGGGACGTGGTGCACTGTTGTTCTTTCCCTGCCAATATGCACTCGTCCCGGCCTCCGGCCCCCTCGGCCCCCC | mirL    | 20  | 2     |
| ---GACGGGACGTGGTGCACTGTTGTTCTTTCCCTGCCAATATGCACTCGTCCCGGCCTCCGGCCCCCTCGGCCCCCC | mirL    | 22  | 2     |
| ---GACGGGACGTGGTGCACTGTTGTTCTTTCCCTGCCAATATGCACTCGTCCCGGCCTCCGGCCCCCTCGGCCCCCC | mirL    | 18  | 2     |
| ---GACGGGACGTGGTGCACTGTTGTTCTTTCCCTGCCAATATGCACTCGTCCCGGCCTCCGGCCCCCTCGGCCCCCC | mirL    | 19  | 2     |
| ---GACGGGACGTGGTGCACTGTTGTTCTTTCCCTGCCAATATGCACTCGTCCCGGCCTCCGGCCCCCTCGGCCCCCC | mirL    | 21  | 1     |
| ---GACGGGACGTGGTGCACTGTTGTTCTTTCCCTGCCAATATGCACTCGTCCCGGCCTCCGGCCCCCTCGGCCCCCC | mirL    | 18  | 1     |
| -----TATTGCACTCGTCCCGGCCTCC-----                                               | mirR    | 22  | 39352 |
| -----TATTGCACTCGTCCCGGCCTCC-----                                               | mirR    | 21  | 11794 |
| -----TATTGCACTCGTCCCGGCCTCC-----                                               | mirR    | 23  | 5084  |
| -----TATTGCACTCGTCCCGGC-----                                                   | mirR    | 19  | 4954  |
| -----TATTGCACTCGTCCCGGC-----                                                   | mirR    | 18  | 4776  |
| -----TATTGCACTCGTCCCGGCCT-----                                                 | mirR    | 20  | 3536  |
| -----ATTGCACTCGTCCCGGCCTCC-----                                                | mirR    | 21  | 3183  |
| -----TATTGCACTCGTCCCGGCCTCCGG-----                                             | mirR    | 24  | 3083  |
| -----ATTGCACTCGTCCCGGCCTCCG-----                                               | mirR    | 22  | 1525  |
| -----ATTGCACTCGTCCCGGCCTC-----                                                 | mirR    | 20  | 1093  |
| -----ATTGCACTCGTCCCGGCCTCCG-----                                               | mirR    | 23  | 427   |
| -----ATTGCACTCGTCCCGGC-----                                                    | mirR    | 18  | 390   |
| -----ATTGCACTCGTCCCGGCCT-----                                                  | mirR    | 19  | 361   |
| -----ATTGCACTCGTCCCGGCCTCCGG-----                                              | mirR    | 24  | 258   |
| -----ATATTGCACTCGTCCCGGCCTCC-----                                              | mirR    | 23  | 70    |
| -----ATATTGCACTCGTCCCGGC-----                                                  | mirR    | 19  | 17    |
| -----ATATTGCACTCGTCCCGGC-----                                                  | mirR    | 20  | 17    |
| -----ATATTGCACTCGTCCCGGCCTC-----                                               | mirR    | 22  | 13    |
| -----ATATTGCACTCGTCCCGGCCTCCG-----                                             | mirR    | 24  | 12    |
| -----ATATTGCACTCGTCCCGGCCTCCGG-----                                            | mirR    | 25  | 9     |
| -----ATATTGCACTCGTCCCGGCCT-----                                                | mirR    | 21  | 5     |
| -----TTGCACTCGTCCCGGCCTCC-----                                                 | mirR    | 20  | 3     |

```

-----TGCCTCGTCCCGGCCTCCG----- mirR 20 3
-----TGCCTCGTCCCGGCCTCC----- mirR 19 2
-----TTGCTCGTCCCGGCCTCCG----- mirR 21 2
-----TGCCTCGTCCCGGCCTCC----- mirR 18 2
-----TTGCTCGTCCCGGCCTCC----- mirR 19 2
-----TGCCTCGTCCCGGCCTCCGCGC----- mirR 22 1
-----CAATATTGCCTCGTCCCGGCCTCC----- mirR 25 1
-----GGCCCCCTCGCCCCCCC morR 18 2

```

>mmu-let-7e

```

GGCTGAGGTAGGAGGTTGTATAGTTGAGGAAGACACCCGAGGAGATCACTATACGGCCTCCTAGCTTTCCCCAGGCTGCGCCCTGCACT species len reads
---TGAGGTAGGAGGTTGTATAGTT----- mirL 22 26059
---TGAGGTAGGAGGTTGTATAG----- mirL 20 16316
---TGAGGTAGGAGGTTGTATAGT----- mirL 21 14197
---TGAGGTAGGAGGTTGTATAGTTG----- mirL 23 9979
---TGAGGTAGGAGGTTGTATA----- mirL 19 6937
---GAGGTAGGAGGTTGTATAGTT----- mirL 21 965
---GAGGTAGGAGGTTGTATAG----- mirL 19 638
---GAGGTAGGAGGTTGTATAGTTG----- mirL 22 606
---GAGGTAGGAGGTTGTATAGT----- mirL 20 501
---GAGGTAGGAGGTTGTATAGTTGA----- mirL 23 287
---AGGTAGGAGGTTGTATAGTTG----- mirL 21 5
---CTGAGGTAGGAGGTTGTATAGT----- mirL 22 4
---GGTAGGAGGTTGTATAGTTG----- mirL 20 3
---CTGAGGTAGGAGGTTGTATAGTT----- mirL 23 3
-GCTGAGGTAGGAGGTTGTATAGT----- mirL 23 2
---AGGTAGGAGGTTGTATAGTT----- mirL 20 2
---GGTAGGAGGTTGTATAGTT----- mirL 19 2
---GGTAGGAGGTTGTATAGT----- mirL 18 2
---AGGTAGGAGGTTGTATAG----- mirL 18 2
---CTGAGGTAGGAGGTTGTATAGTTG----- mirL 24 1
---CTGAGGTAGGAGGTTGTATAG----- mirL 21 1
---CTGAGGTAGGAGGTTGTATA----- mirL 20 1
GGCTGAGGTAGGAGGTTGTATA----- mirL 22 1
-----GAGGAAGACACCCGAGGAGATC----- loop 22 2
-----GAAGACACCCGAGGAGAT----- loop 18 1
-----CTATACGGCCTCCTAGCTTTCC----- mirR 22 1844
-----CTATACGGCCTCCTAGCTTTC----- mirR 21 430
-----CTATACGGCCTCCTAGCTTTCCC----- mirR 23 177
-----CTATACGGCCTCCTAGCTTT----- mirR 20 134
-----TATACGGCCTCCTAGCTTTCC----- mirR 21 68
-----TATACGGCCTCCTAGCTTTCCC----- mirR 22 43
-----CTATACGGCCTCCTAGCT----- mirR 18 21
-----CTATACGGCCTCCTAGCTTT----- mirR 19 19
-----CTATACGGCCTCCTAGCTTTCCCC----- mirR 24 17
-----ACTATACGGCCTCCTAGCTTTCC----- mirR 23 11

```

```

-----TATACGGCCTCCTAGCTTTC----- mirR 20 11
-----CACTATACGGCCTCCTAGCTTTC----- mirR 23 10
-----ATACGGCCTCCTAGCTTTCC----- mirR 20 8
-----ACTATACGGCCTCCTAGCTTTC----- mirR 22 8
-----TCACTATACGGCCTCCTAGCTTTCC----- mirR 25 7
-----TATACGGCCTCCTAGCTTT----- mirR 19 5
-----ATACGGCCTCCTAGCTTTCCC----- mirR 21 4
-----CACTATACGGCCTCCTAGC----- mirR 19 4
-----ACTATACGGCCTCCTAGCTTT----- mirR 21 4
-----TCACTATACGGCCTCCTAG----- mirR 19 4
-----TCACTATACGGCCTCCTAGCTT----- mirR 22 3
-----TATACGGCCTCCTAGCTTTCCCC----- mirR 23 3
-----CACTATACGGCCTCCTAGCTTT----- mirR 22 3
-----TCACTATACGGCCTCCTAGC----- mirR 20 3
-----CACTATACGGCCTCCTAGCTT----- mirR 21 2
-----TACGGCCTCCTAGCTTTCC----- mirR 19 2
-----TCACTATACGGCCTCCTAGCTTTC----- mirR 24 2
-----CACTATACGGCCTCCTAG----- mirR 18 2
-----ATACGGCCTCCTAGCTTTCCCC----- mirR 22 2
-----ATACGGCCTCCTAGCTTTC----- mirR 19 1
-----ATACGGCCTCCTAGCTTT----- mirR 18 1
-----ACTATACGGCCTCCTAGCTTTCCCC----- mirR 25 1
-----CACTATACGGCCTCCTAGCTTTCC----- mirR 24 1
-----ACTATACGGCCTCCTAGC----- mirR 18 1
-----CAGGCTGCGCCCTGCACT morR 18 1
-----CCAGGCTGCGCCCTGCAC- morR 18 1

```

>mmu-mir-27a

```

GACAACCTGGCCTGAGGAGCAGGGCTTAGCTGCTTGTGAGCAAGGTCCACAGCAAAGTCGTGTTACAGTGGCTAAGTTCGGCCCCCTGGACCCCATCTCCTC species len reads
GACAACCTGGCCTGAGGAG----- morL 18 1
-----AGGGCTTAGCTGCTTGTGAGCA----- mirL 22 5
-----AGGGCTTAGCTGCTTGTGA----- mirL 19 1
-----AGGGCTTAGCTGCTTGTGAGC----- mirL 21 1
-----AGGTCCACAGCAAAGTCGTGTT----- loop 23 3
-----TTCACAGTGGCTAAGTTCGG----- mirR 20 23680
-----TTCACAGTGGCTAAGTTCGGC----- mirR 21 19496
-----TTCACAGTGGCTAAGTTCGGCC----- mirR 22 10980
-----TTCACAGTGGCTAAGTTC----- mirR 19 10094
-----TTCACAGTGGCTAAGTTCGGCCC----- mirR 23 6052
-----TCACAGTGGCTAAGTTCGG----- mirR 19 2239
-----TCACAGTGGCTAAGTTCGGC----- mirR 20 1589
-----TCACAGTGGCTAAGTTCGGCCC----- mirR 22 985
-----TTCACAGTGGCTAAGTTCGGCCCC----- mirR 24 977
-----TCACAGTGGCTAAGTTCGGCC----- mirR 21 879
-----TTCACAGTGGCTAAGTTCGGCCCC----- mirR 25 569
-----TCACAGTGGCTAAGTTC----- mirR 18 515

```



```

-----TCACAGTGGCTAAGTTCCGCCCC-----mirR 23 207
-----GTTTCACAGTGGCTAAGTTCCG-----mirR 21 76
-----GTTTCACAGTGGCTAAGTTCCG-----mirR 22 74
-----GTTTCACAGTGGCTAAGTTCC-----mirR 20 59
-----TCACAGTGGCTAAGTTCCGCCCC-----mirR 24 48
-----GTTTCACAGTGGCTAAGTTCCGCC-----mirR 23 23
-----CACAGTGGCTAAGTTCCG-----mirR 18 12
-----ACAGTGGCTAAGTTCCGCC-----mirR 19 5
-----CACAGTGGCTAAGTTCCGCC-----mirR 20 4
-----CACAGTGGCTAAGTTCCG-----mirR 19 3
-----ACAGTGGCTAAGTTCCGCCCC-----mirR 20 2
-----CACAGTGGCTAAGTTCCGCC-----mirR 21 2
-----GTTTCACAGTGGCTAAGTTCCGCCCC-----mirR 24 2
-----CACAGTGGCTAAGTTCCGCCCC-----mirR 22 1
-----GTTTCACAGTGGCTAAGTTCCGCCCC-----mirR 25 1
-----ACAGTGGCTAAGTTCCG-----mirR 18 1
-----ACAGTGGCTAAGTTCCGCCCC-----mirR 21 1
-----CCCTGGACCCCATCTCC-----morR 18 1
-----CCCTGGACCCCATCTCCTC-----morR 19 1

```

>mmu-mir-34a

```

CTTTGGCAGTGTCTTAGCTGGTTGTTGTGAGTATTAGCTAAGGAAGCAATCAGCAAGTATACTGCCTAGA species len reads
---TGGCAGTGTCTTAGCTGGTTGT-----mirL 22 58718
---TGGCAGTGTCTTAGCTGGTTGTT-----mirL 23 6368
---GGCAGTGTCTTAGCTGGTTGT-----mirL 21 2295
---TGGCAGTGTCTTAGCTGGTTG-----mirL 21 1925
---TGGCAGTGTCTTAGCTGGTT-----mirL 20 1525
---TGGCAGTGTCTTAGCTGGT-----mirL 19 1149
---GGCAGTGTCTTAGCTGGTTGTT-----mirL 22 826
---GGCAGTGTCTTAGCTGGTTG-----mirL 20 76
--TTGGCAGTGTCTTAGCTGGTTGT-----mirL 23 74
--TTTGGCAGTGTCTTAGCTGGTTGT-----mirL 24 62
---GGCAGTGTCTTAGCTGGTT-----mirL 19 57
---GGCAGTGTCTTAGCTGGTTGTTG-----mirL 23 53
--TTTGGCAGTGTCTTAGCTGGTT-----mirL 22 38
--TTGGCAGTGTCTTAGCTGGTTG-----mirL 22 27
--TTTGGCAGTGTCTTAGCTGGTTG-----mirL 23 22
--TTGGCAGTGTCTTAGCTGGTTGTTG-----mirL 25 9
--TTGGCAGTGTCTTAGCTGGTT-----mirL 21 8
--TTTGGCAGTGTCTTAGCTGGTTGTT-----mirL 25 7
-----CAGTGTCTTAGCTGGTTGT-----mirL 19 5
-----GCAGTGTCTTAGCTGGTTGTT-----mirL 21 4
--TTTGGCAGTGTCTTAGCTGG-----mirL 20 4
-----GCAGTGTCTTAGCTGGTTGT-----mirL 20 4
--TTGGCAGTGTCTTAGCTGGTTGTT-----mirL 24 4
CTTTGGCAGTGTCTTAGCTGGTTGT-----mirL 25 1

```

```

-----TGTGAGTATTAGCTAAGGAAGC----- loop 22 2
-----AATCAGCAAGTATACTGCCCTA-- mirR 22 2765
-----AATCAGCAAGTATACTGCC-- mirR 20 585
-----AATCAGCAAGTATACTGCCCT-- mirR 21 258
-----AATCAGCAAGTATACTGCCCTAG- mirR 23 217
-----CAATCAGCAAGTATACTGCCCTA-- mirR 23 162
-----AATCAGCAAGTATACTGCC-- mirR 19 145
-----CAATCAGCAAGTATACTGCC-- mirR 21 88
-----CAATCAGCAAGTATACTGCCCT-- mirR 22 61
-----CAATCAGCAAGTATACTGCC-- mirR 20 32
-----CAATCAGCAAGTATACTGC-- mirR 19 30
-----CAATCAGCAAGTATACTGCCCTAG- mirR 24 26
-----ATCAGCAAGTATACTGCCCTAG- mirR 22 25
-----AATCAGCAAGTATACTGC-- mirR 18 24
-----ATCAGCAAGTATACTGCCCTA-- mirR 21 17
-----AATCAGCAAGTATACTGCCCTAGA mirR 24 8
-----ATCAGCAAGTATACTGCC-- mirR 19 7
-----ATCAGCAAGTATACTGCCCTAGA mirR 23 3
-----ATCAGCAAGTATACTGCCCT-- mirR 20 2
-----CAATCAGCAAGTATACTGCCCTAGA mirR 25 2
-----GCAATCAGCAAGTATACTGCC-- mirR 22 2
-----TCAGCAAGTATACTGCCCTAGA mirR 22 1
-----TCAGCAAGTATACTGCCCTAG- mirR 21 1
-----GCAATCAGCAAGTATACTGC-- mirR 20 1
-----GCAATCAGCAAGTATACT-- mirR 18 1
-----TCAGCAAGTATACTGCCCT-- mirR 19 1
-----CAGCAAGTATACTGCCCTA-- mirR 19 1
-----AGCAATCAGCAAGTATACT-- mirR 19 1
-----CAGCAAGTATACTGCCCT-- mirR 18 1

>mmu-mir-221
GAACATCCAGGTCTGGGGCATGAACCTGGCATACAATGTAGATTTCTGTGTTTGTAGGCAACAGCTACATTGTCTGCTGGGTTTCAGGCTACCTGGAATCATTTC species len reads
-----CAGGTCTGGGGCATGAAC----- morL 18 1
GAACATCCAGGTCTGGGGCATGAA----- morL 24 1
-----ACCTGGCATACAATGTAGATTTCT----- mirL 23 794
-----ACCTGGCATACAATGTAGATTT----- mirL 22 121
-----ACCTGGCATACAATGTAG----- mirL 18 107
-----ACCTGGCATACAATGTAG----- mirL 19 73
-----ACCTGGCATACAATGTAGATTTCTGT----- mirL 26 65
-----AACCTGGCATACAATGTAGATTTCT----- mirL 24 14
-----AACCTGGCATACAATGTAG----- mirL 20 4
-----AACCTGGCATACAATGTAGAT----- mirL 21 3
-----AACCTGGCATACAATGTA----- mirL 18 3
-----AACCTGGCATACAATGTAGATTT----- mirL 23 3
-----TGGCATACAATGTAGATTTCTGT----- mirL 23 1
-----TGGCATACAATGTAGATTT----- mirL 18 1

```

```

-----GAACCTGGCATAACAATGT----- mirL 18 1
-----CTGGCATAACAATGTAGAT----- mirL 18 1
-----AGCTACATTGTCTGCTGGGTTTC----- mirR 23 42026
-----AGCTACATTGTCTGCTGGGTTT----- mirR 22 12261
-----AGCTACATTGTCTGCTGGGTT----- mirR 21 6563
-----AGCTACATTGTCTGCTGGGT----- mirR 20 5024
-----AGCTACATTGTCTGCTGGG----- mirR 19 3647
-----AGCTACATTGTCTGCTGGGTTTCA----- mirR 24 2369
-----AGCTACATTGTCTGCTGG----- mirR 18 2173
-----GCTACATTGTCTGCTGGGTTT----- mirR 21 49
-----GCTACATTGTCTGCTGGGTTTC----- mirR 22 35
-----CAGCTACATTGTCTGCTGGGTTTC----- mirR 24 18
-----TACATTGTCTGCTGGGTTT----- mirR 19 14
-----CAGCTACATTGTCTGCTGGGTTT----- mirR 23 11
-----TACATTGTCTGCTGGGTTTC----- mirR 20 6
-----GCTACATTGTCTGCTGGGTT----- mirR 20 5
-----GCTACATTGTCTGCTGGGTTTCA----- mirR 23 4
-----CTACATTGTCTGCTGGGTTT----- mirR 20 4
-----CAGCTACATTGTCTGCTGGGTT----- mirR 22 4
-----TACATTGTCTGCTGGGTTTCA----- mirR 21 3
-----GCTACATTGTCTGCTGGGT----- mirR 19 3
-----GCTACATTGTCTGCTGGG----- mirR 18 2
-----TACATTGTCTGCTGGGTT----- mirR 18 2
-----ACAGCTACATTGTCTGCTGG----- mirR 20 2
-----CAGCTACATTGTCTGCTGGGTTTCAG----- mirR 26 2
-----CAGCTACATTGTCTGCTGGGT----- mirR 21 2
-----GCTACATTGTCTGCTGGGTTTCAG----- mirR 24 1
-----CTACATTGTCTGCTGGGTT----- mirR 19 1
-----CTACATTGTCTGCTGGGTTTC----- mirR 21 1
-----ACAGCTACATTGTCTGCTGGGTT----- mirR 23 1
-----ACAGCTACATTGTCTGCTGGGTTTC----- mirR 25 1
-----CAGCTACATTGTCTGCTGG----- mirR 19 1
-----GCTACCTGGAATCATTTC morR 18 1

```

>mmu-mir-541

```

GAGAAGGGATTCTGATGTTGGTCACACTCCAAGAGTTTTAAATGAGTGGCGAACACAGAATCCATACTCT species len reads
---AAGGGATTCTGATGTTGGTCAC----- mirL 22 31571
---AAGGGATTCTGATGTTGGTCACAC----- mirL 24 22715
---AAGGGATTCTGATGTTGGTC----- mirL 20 8730
---AAGGGATTCTGATGTTGGTCACACT----- mirL 25 5142
---AAGGGATTCTGATGTTGGTCA----- mirL 21 4745
---AGGGATTCTGATGTTGGTCACAC----- mirL 23 34
---AGGGATTCTGATGTTGGTCAC----- mirL 21 25
---GAAGGGATTCTGATGTTGGTCAC----- mirL 23 17
---AGGGATTCTGATGTTGGTCACACT----- mirL 24 13
---AGGGATTCTGATGTTGGTC----- mirL 19 12

```

```

-----AGGGATTCTGATGTTGGTCACACTC----- mirL 25 10
--GAAGGGATTCTGATGTTGGTC----- mirL 21 4
-----GGGATTCTGATGTTGGTCACACTCC----- mirL 25 3
-----GGGATTCTGATGTTGGTCACACT----- mirL 23 3
--GAAGGGATTCTGATGTTGGTCACACT----- mirL 26 2
-----GGGATTCTGATGTTGGTCACA----- mirL 21 2
-----GGATTCTGATGTTGGTCAC----- mirL 19 2
-----GGGATTCTGATGTTGGTC----- mirL 18 2
-----GGGATTCTGATGTTGGTCACAC----- mirL 22 2
--GAAGGGATTCTGATGTTGGTCACAC----- mirL 25 1
GAGAAGGGATTCTGATGTTG----- mirL 20 1
--AGAAGGGATTCTGATGTTGGTCACA----- mirL 25 1
--GAAGGGATTCTGATGTTGGTCACA----- mirL 24 1
-----TCCAAGAGTTTAAAAATGA----- loop 19 1
-----AGTGGCGAACACAGAATCCAT----- mirR 21 221
-----AGTGGCGAACACAGAATCCATAC--- mirR 23 156
-----TGGCGAACACAGAATCCATAC--- mirR 21 139
-----TGGCGAACACAGAATCCATACTC- mirR 23 79
-----TGGCGAACACAGAATCCATA--- mirR 20 42
-----TGGCGAACACAGAATCCATACT-- mirR 22 41
-----AGTGGCGAACACAGAATCC----- mirR 19 39
-----TGGCGAACACAGAATCCAT----- mirR 19 35
-----AGTGGCGAACACAGAATCCA----- mirR 20 23
-----AGTGGCGAACACAGAATC----- mirR 18 17
-----AGTGGCGAACACAGAATCCATACTC- mirR 25 12
-----GTGGCGAACACAGAATCCATAC--- mirR 22 11
-----AGTGGCGAACACAGAATCCATA--- mirR 22 11
-----GGCGAACACAGAATCCATACT-- mirR 21 6
-----GTGGCGAACACAGAATCCAT----- mirR 20 3
-----GGCGAACACAGAATCCATAC--- mirR 20 2
-----GGCGAACACAGAATCCATACTC- mirR 22 2
-----TGGCGAACACAGAATCCA----- mirR 18 2
-----GTGGCGAACACAGAATCC----- mirR 18 1
-----GTGGCGAACACAGAATCCA----- mirR 19 1
-----GTGGCGAACACAGAATCCATA--- mirR 21 1
-----TGAGTGGCGAACACAGAATCC----- mirR 21 1
-----GGCGAACACAGAATCCATA--- mirR 19 1
-----TGGCGAACACAGAATCCATACTCT mirR 24 1
-----GAGTGGCGAACACAGAATCC----- mirR 20 1

```

>mmu-mir-708

```

TGAAATGGGGACTGCCCTCAAGGAGCTTACAATCTAGCTGGGGTAGATGACTTGCACCTGAACACAACCTAGACTGTGAGCTTCTAGAGGGCAGGGGCCCTTACCCTAGTCATCTCTCT species len reads
TGAAATGGGGACTGCCCT----- morL 18 1
-----AAGGAGCTTACAATCTAGCTGG----- mirL 22 27387
-----AAGGAGCTTACAATCTAGCTGGG----- mirL 23 13741
-----AAGGAGCTTACAATCTAGC----- mirL 19 12572

```

```

-----AAGGAGCTTACAATCTAGCTG----- mirL 21 11644
-----AAGGAGCTTACAATCTAGCT----- mirL 20 3145
-----AGGAGCTTACAATCTAGCTGG----- mirL 22 432
-----AGGAGCTTACAATCTAGCTGG----- mirL 21 258
-----AGGAGCTTACAATCTAGCTG----- mirL 20 124
-----AGGAGCTTACAATCTAGC----- mirL 18 68
-----AGGAGCTTACAATCTAGCTGGG----- mirL 23 62
-----GGAGCTTACAATCTAGCTGG----- mirL 21 16
-----GGAGCTTACAATCTAGCTGG----- mirL 20 13
-----CAAGGAGCTTACAATCTAGCTG----- mirL 22 9
-----GAGCTTACAATCTAGCTGG----- mirL 20 9
-----CAAGGAGCTTACAATCTAGCTGG----- mirL 23 8
-----GAGCTTACAATCTAGCTGG----- mirL 19 7
-----CAAGGAGCTTACAATCTAGC----- mirL 20 6
-----GGAGCTTACAATCTAGCT----- mirL 18 3
-----GAGCTTACAATCTAGCTGGG----- mirL 21 3
-----CAAGGAGCTTACAATCTAGCT----- mirL 21 3
-----GGAGCTTACAATCTAGCTG----- mirL 19 3
-----CAAGGAGCTTACAATCTA----- mirL 18 2
-----GAGCTTACAATCTAGCTG----- mirL 18 1
-----GGAGCTTACAATCTAGCTGGG----- mirL 22 1
-----TCAAGGAGCTTACAATCTAG----- mirL 20 1
-----GGTAGATGACTTGCACTTGAACAC----- loop 24 2
-----CAACTAGACTGTGAGCTTCT----- mirR 20 1729
-----CAACTAGACTGTGAGCTTCTA----- mirR 21 926
-----CAACTAGACTGTGAGCTTC----- mirR 19 493
-----CAACTAGACTGTGAGCTTCTAG----- mirR 22 284
-----AACTAGACTGTGAGCTTCT----- mirR 19 135
-----CAACTAGACTGTGAGCTTCTAGA----- mirR 23 104
-----CAACTAGACTGTGAGCTT----- mirR 18 100
-----AACTAGACTGTGAGCTTCTA----- mirR 20 97
-----AACTAGACTGTGAGCTTCTAG----- mirR 21 52
-----AACTAGACTGTGAGCTTCTAGA----- mirR 22 51
-----AACTAGACTGTGAGCTTC----- mirR 18 38
-----ACACAAGTACTGTGAGCTTC----- mirR 22 17
-----CAACTAGACTGTGAGCTTCTAGAG----- mirR 24 17
-----AACTAGACTGTGAGCTTCTAGAG----- mirR 23 16
-----ACTAGACTGTGAGCTTCT----- mirR 18 15
-----ACTAGACTGTGAGCTTCTA----- mirR 19 15
-----ACTAGACTGTGAGCTTCTAG----- mirR 20 8
-----ACTAGACTGTGAGCTTCTAGA----- mirR 21 8
-----ACTAGACTGTGAGCTTCTAGAG----- mirR 22 6
-----ACACAAGTACTGTGAGC----- mirR 19 6
-----ACAAGTACTGTGAGCTTCT----- mirR 21 6
-----ACACAAGTACTGTGAGCTT----- mirR 21 3
-----ACAAGTACTGTGAGCTTC----- mirR 20 2

```

```
-----AACTAGACTGTGAGCTTCTAGAGGG----- mirR 25 1
-----ACACAAGTACTGTGAGCT----- mirR 20 1
-----ACTAGACTGTGAGCTTCTAGAGGG----- mirR 24 1
-----ACACAAGTACTGTGAG----- mirR 18 1
-----ACACAAGTACTGTGAGCTTCT----- mirR 23 1
-----GGCAGGGCCCTTACCCTAGTCATCTCTCT morR 30 1
```

>mmu-mir-551b

```
TGTGCTCTTGTGGCCATGAAATCAAGCTTGGGTGAGACCTGGTGCAGAACAGGAAGGCGACCCATACTTGGTTTCAGTGGC species len reads
TGTGCTCTTGTGGCCAT----- morL 18 1
-----GAAATCAAGCTTGGGTGAGACC----- mirL 22 32
-----GAAATCAAGCTTGGGTGAGACCT----- mirL 23 9
-----GAAATCAAGCTTGGGTGAGAC----- mirL 21 9
-----GAAATCAAGCTTGGGTGAG----- mirL 19 5
-----GAAATCAAGCTTGGGTGAGA----- mirL 20 4
-----AAATCAAGCTTGGGTGAGACC----- mirL 21 2
-----AAATCAAGCTTGGGTGAGACCT----- mirL 22 1
-----GCGACCCATACTTGGTTTCAGT--- mirR 22 19858
-----GCGACCCATACTTGGTTTC----- mirR 19 17664
-----GCGACCCATACTTGGTTTCA----- mirR 20 15368
-----GCGACCCATACTTGGTTTCAG--- mirR 21 12357
-----GCGACCCATACTTGGTTTCAGT--- mirR 23 3459
-----GCGACCCATACTTGGTTT----- mirR 18 1654
-----GCGACCCATACTTGGTTTCAGT--- mirR 24 942
-----CGACCCATACTTGGTTTCAGT--- mirR 22 360
-----CGACCCATACTTGGTTTC----- mirR 18 211
-----CGACCCATACTTGGTTTCAGT--- mirR 21 150
-----CGACCCATACTTGGTTTCA----- mirR 19 84
-----CGACCCATACTTGGTTTCAGT--- mirR 23 83
-----CGACCCATACTTGGTTTCAG--- mirR 20 52
-----CGACCCATACTTGGTTTCAGTGGC mirR 24 41
-----GACCCATACTTGGTTTCA----- mirR 18 9
-----ACCCATACTTGGTTTCAGT--- mirR 19 6
-----GGCGACCCATACTTGGTTTCA----- mirR 21 5
-----GGCGACCCATACTTGGTTTCAG--- mirR 22 4
-----GACCCATACTTGGTTTCAGT--- mirR 20 3
-----GGCGACCCATACTTGGTTTCAGT--- mirR 23 3
-----ACCCATACTTGGTTTCAGT--- mirR 20 3
-----GACCCATACTTGGTTTCAG--- mirR 19 3
-----GGCGACCCATACTTGGTTT----- mirR 20 2
-----AGGCGACCCATACTTGGTTTCAGT--- mirR 24 2
-----AGGCGACCCATACTTGGTTTCA----- mirR 22 1
-----AGGCGACCCATACTTGGTTT----- mirR 21 1
-----GGCGACCCATACTTGGTTT----- mirR 19 1
-----ACCCATACTTGGTTTCAGT--- mirR 21 1
-----GACCCATACTTGGTTTCAGTGGC mirR 23 1
```

```

-----GACCCATACTTGGTTTCAGTG-- mirR 21 1

>mmu-mir-376a
TCTTTGATATTTAAAGGTAGATTCTCCTTCTATGAGTACAATATTAATGACTAATCGTAGAGGAAAATCCACGTTTTTC species len reads
TCTTTGATATTTAAAGG-----morL 18 1
-----GGTAGATTCTCCTTCTATGAGT-----mirL 22 820
-----GTAGATTCTCCTTCTATGAGT-----mirL 21 489
-----TAGATTCTCCTTCTATGAGTAC-----mirL 22 261
-----GTAGATTCTCCTTCTATGAGTAC-----mirL 23 243
-----GGTAGATTCTCCTTCTATGAGTAC-----mirL 24 138
-----GTAGATTCTCCTTCTATGAGTA-----mirL 22 116
-----GGTAGATTCTCCTTCTATGA-----mirL 20 111
-----GGTAGATTCTCCTTCTATGAGTA-----mirL 23 111
-----GGTAGATTCTCCTTCTATGAG-----mirL 21 78
-----GTAGATTCTCCTTCTATGA-----mirL 19 60
-----GTAGATTCTCCTTCTATGAG-----mirL 20 52
-----AGATTCTCCTTCTATGAGTAC-----mirL 21 41
-----AGGTAGATTCTCCTTCTATGAGT-----mirL 23 15
-----TAGATTCTCCTTCTATGAGTACA-----mirL 23 12
-----TAGATTCTCCTTCTATGAGT-----mirL 20 8
-----AAGGTAGATTCTCCTTCTATGA-----mirL 22 7
-----TAGATTCTCCTTCTATGAGTA-----mirL 21 5
-----TAGATTCTCCTTCTATGA-----mirL 18 4
-----AGGTAGATTCTCCTTCTAT-----mirL 19 4
-----AAGGTAGATTCTCCTTCTAT-----mirL 20 3
-----AGGTAGATTCTCCTTCTATGAGTA-----mirL 24 3
-----AGATTCTCCTTCTATGAGT-----mirL 19 2
-----AAGGTAGATTCTCCTTCTATGAG-----mirL 23 2
-----AGGTAGATTCTCCTTCTATGAG-----mirL 22 2
-----AAGGTAGATTCTCCTTCT-----mirL 18 2
-----AAGGTAGATTCTCCTTCTATG-----mirL 21 2
-----AGATTCTCCTTCTATGAGTACA-----mirL 22 2
-----AGGTAGATTCTCCTTCTATGA-----mirL 21 2
-----AAAGGTAGATTCTCCTTCT-----mirL 19 1
-----ATCGTAGAGGAAAATCCACGT-----mirR 21 45723
-----ATCGTAGAGGAAAATCCACGTT-----mirR 22 8692
-----ATCGTAGAGGAAAATCCAC-----mirR 19 7747
-----ATCGTAGAGGAAAATCCACG-----mirR 20 3467
-----ATCGTAGAGGAAAATCCA-----mirR 18 1779
-----ATCGTAGAGGAAAATCCACGTTT-----mirR 23 922
-----AATCGTAGAGGAAAATCCACGT-----mirR 22 296
-----CGTAGAGGAAAATCCACGT-----mirR 19 136
-----ATCGTAGAGGAAAATCCACGTTTT-----mirR 24 87
-----AATCGTAGAGGAAAATCCACG-----mirR 21 52
-----TCGTAGAGGAAAATCCACGT-----mirR 20 44
-----AATCGTAGAGGAAAATCCAC-----mirR 20 37

```

```

-----AATCGTAGAGGAAAAATCCACGTT--- mirR 23 28
-----AATCGTAGAGGAAAAATCCA----- mirR 19 25
-----CGTAGAGGAAAAATCCACGTT--- mirR 20 24
-----AATCGTAGAGGAAAAATCC----- mirR 18 23
-----GTAGAGGAAAAATCCACGT--- mirR 18 20
-----GTAGAGGAAAAATCCACGTTT--- mirR 21 19
-----TCGTAGAGGAAAAATCCACGTT--- mirR 21 11
-----GTAGAGGAAAAATCCACGTTT--- mirR 20 9
-----TCGTAGAGGAAAAATCCACGTTT--- mirR 22 7
-----CGTAGAGGAAAAATCCACGTTT--- mirR 21 6
-----GTAGAGGAAAAATCCACGTTTTC mirR 22 4
-----CGTAGAGGAAAAATCCACG----- mirR 18 4
-----TCGTAGAGGAAAAATCCACG----- mirR 19 3
-----TCGTAGAGGAAAAATCCAC----- mirR 18 2
-----GTAGAGGAAAAATCCACGTT--- mirR 19 2
-----TAATCGTAGAGGAAAAATCCA----- mirR 20 1
-----TCGTAGAGGAAAAATCCACGTTTTC mirR 24 1
-----TAATCGTAGAGGAAAAATCCACG----- mirR 22 1
-----CTAATCGTAGAGGAAAAAT----- mirR 18 1

```

>mmu-mir-30d

| TCAGAAAGTCTGTGCTGTGTAACATCCCCGACTGGAAGCTGTAAAGCCACAGCCAAGCTTTCAGTCAGATGTTTGCTGCTACTGGCTCTTCGAATGC | species | len | reads |
|---------------------------------------------------------------------------------------------------|---------|-----|-------|
| TCAGAAAGTCTGTGCTGTG                                                                               | morL    | 19  | 1     |
| -----TGTAACATCCCCGACTGGAAGC-----                                                                  | mirL    | 23  | 30166 |
| -----TGTAACATCCCCGACTGGAA-----                                                                    | mirL    | 21  | 11871 |
| -----TGTAACATCCCCGACTGG-----                                                                      | mirL    | 19  | 9950  |
| -----TGTAACATCCCCGACTGGA-----                                                                     | mirL    | 20  | 8794  |
| -----TGTAACATCCCCGACTGGAAG-----                                                                   | mirL    | 22  | 5570  |
| -----GTAACATCCCCGACTGGAAGC-----                                                                   | mirL    | 22  | 2026  |
| -----GTAACATCCCCGACTGGAA-----                                                                     | mirL    | 20  | 698   |
| -----GTAACATCCCCGACTGGAAG-----                                                                    | mirL    | 21  | 567   |
| -----GTAACATCCCCGACTGG-----                                                                       | mirL    | 18  | 559   |
| -----GTAACATCCCCGACTGGA-----                                                                      | mirL    | 19  | 418   |
| -----CTGTAAACATCCCCGACTGGAAGC-----                                                                | mirL    | 24  | 16    |
| -----AAACATCCCCGACTGGAAG-----                                                                     | mirL    | 19  | 6     |
| -----TAAACATCCCCGACTGGAAG-----                                                                    | mirL    | 20  | 5     |
| -----CTGTAAACATCCCCGACTGGAA-----                                                                  | mirL    | 22  | 5     |
| -----TAAACATCCCCGACTGGAAGC-----                                                                   | mirL    | 21  | 4     |
| -----CTGTAAACATCCCCGACTGG-----                                                                    | mirL    | 20  | 4     |
| -----TAAACATCCCCGACTGGAA-----                                                                     | mirL    | 19  | 3     |
| -----CTGTAAACATCCCCGACT-----                                                                      | mirL    | 18  | 3     |
| -----CTGTAAACATCCCCGACTGGAAGCTG-----                                                              | mirL    | 26  | 3     |
| -----AAACATCCCCGACTGGAAGC-----                                                                    | mirL    | 20  | 3     |
| -----AAACATCCCCGACTGGAA-----                                                                      | mirL    | 18  | 2     |
| -----TAAACATCCCCGACTGGAAGCTG-----                                                                 | mirL    | 23  | 2     |
| -----TAAACATCCCCGACTGGAAGCT-----                                                                  | mirL    | 22  | 2     |



```

-----AAACATCCCCGACTGGAAGCTGT----- mirL 23 2
-----AAACATCCCCGACTGGAAGCT----- mirL 21 2
-----CTTTCAGTCAGATGTTTGCTGC----- mirR 22 72
-----CTTTCAGTCAGATGTTTGC----- mirR 19 55
-----CTTTCAGTCAGATGTTTGCT----- mirR 20 48
-----TTTCAGTCAGATGTTTGCTGC----- mirR 21 19
-----CTTTCAGTCAGATGTTTGCTGCT----- mirR 23 16
-----TTTCAGTCAGATGTTTGC----- mirR 18 13
-----CTTTCAGTCAGATGTTTGCTG----- mirR 21 10
-----CTTTCAGTCAGATGTTTGCTGCTA----- mirR 24 7
-----TTCAGTCAGATGTTTGCTGC----- mirR 20 5
-----CTTTCAGTCAGATGTTTGC----- mirR 18 4
-----TTTCAGTCAGATGTTTGCT----- mirR 19 3
-----TTTCAGTCAGATGTTTGCTG----- mirR 20 2
-----TTCAGTCAGATGTTTGCTGCT----- mirR 21 2
-----TTCAGTCAGATGTTTGCTGCTA----- mirR 22 2
-----TTTCAGTCAGATGTTTGCTGCT----- mirR 22 2
-----AAGCTTTCAGTCAGATGTTTGC----- mirR 22 1
-----TTTCAGTCAGATGTTTGCTGCTAC----- mirR 24 1
-----TCAGTCAGATGTTTGCTGC----- mirR 19 1
-----TTCAGTCAGATGTTTGCTG----- mirR 19 1
-----TACTGGCTCTTCGAATGC morR 18 1

```

>mmu-mir-369

```

CTCTGCTGGTACTTGAAGGGAGATCGACCGTGTATATTCGCTTGGCTGACTTCGAATAATACATGGTTGATCTTTTCTC species len reads
CTCTGCTGGTACTTGAAGG----- morL 19 1
-----AGATCGACCGTGTATATTCGC----- mirL 22 12420
-----AGATCGACCGTGTATATTC----- mirL 20 4702
-----AGATCGACCGTGTATATTCG----- mirL 21 3674
-----AGATCGACCGTGTATATTT----- mirL 19 1917
-----AGATCGACCGTGTATATTCGCT----- mirL 23 959
-----GATCGACCGTGTATATTCGC----- mirL 21 11
-----GATCGACCGTGTATATTT----- mirL 18 3
-----GATCGACCGTGTATATTC----- mirL 19 3
-----GAGATCGACCGTGTATATTC----- mirL 21 3
-----ATCGACCGTGTATATTCGCTTGGCT----- mirL 26 2
-----GATCGACCGTGTATATTCG----- mirL 20 2
-----GAGATCGACCGTGTATATTCGC----- mirL 23 1
-----TCGACCGTGTATATTCGC----- mirL 19 1
-----GAGATCGACCGTGTATAT----- mirL 19 1
-----ATCGACCGTGTATATTC----- mirL 18 1
-----GATCGACCGTGTATATTCGCT----- mirL 22 1
-----TCGACCGTGTATATTCGCTTGGC----- mirL 24 1
-----TCGACCGTGTATATTCGCTTGGCT----- mirL 25 1
-----AATAATACATGGTTGATCTTT----- mirR 21 25222
-----AATAATACATGGTTGATCTT----- mirR 20 4768

```

```

-----AATAATACATGGTTGATCTTTTC-- mirR 23 4727
-----GAATAATACATGGTTGATCTTT---- mirR 22 2735
-----AATAATACATGGTTGATCTTTT--- mirR 22 2723
-----AATAATACATGGTTGATC----- mirR 18 1878
-----AATAATACATGGTTGATCT----- mirR 19 1588
-----GAATAATACATGGTTGATCTT---- mirR 21 720
-----GAATAATACATGGTTGATC----- mirR 19 698
-----GAATAATACATGGTTGATCTTTTC-- mirR 24 318
-----GAATAATACATGGTTGATCTTTT--- mirR 23 291
-----GAATAATACATGGTTGATCT----- mirR 20 240
-----GAATAATACATGGTTGAT----- mirR 18 113
-----AATAATACATGGTTGATCTTTTCTC mirR 25 92
-----ATAATACATGGTTGATCTTT---- mirR 20 57
-----ATAATACATGGTTGATCTTTT--- mirR 21 35
-----ATAATACATGGTTGATCTTTTC-- mirR 22 31
-----ATAATACATGGTTGATCTT----- mirR 19 20
-----AATACATGGTTGATCTTT---- mirR 18 20
-----TAATACATGGTTGATCTTT---- mirR 19 16
-----CGAATAATACATGGTTGATCTT---- mirR 22 11
-----CGAATAATACATGGTTGATCTTT---- mirR 23 10
-----AATACATGGTTGATCTTTT---- mirR 19 7
-----TAATACATGGTTGATCTTTT--- mirR 20 7
-----ATAATACATGGTTGATCT----- mirR 18 6
-----TAATACATGGTTGATCTT----- mirR 18 6
-----CGAATAATACATGGTTGATC----- mirR 20 4
-----TAATACATGGTTGATCTTTTC-- mirR 21 4
-----CGAATAATACATGGTTGATCT----- mirR 21 3
-----CGAATAATACATGGTTGATCTTTTC-- mirR 25 2
-----ATAATACATGGTTGATCTTTTCTC mirR 24 2
-----ATAATACATGGTTGATCTTTTCT- mirR 23 1
-----TAATACATGGTTGATCTTTTCT- mirR 22 1

```

>mmu-mir-1249

```

GGAGGAGGGAGGGGATGGGCCAAGTCCCTATGCCTGGAACGCCCTTCCCCCCTTCTTCACC species len reads
--AGGAGGGAGGGGATGGGCCAAGTTC----- mirL 25 3
--AGGAGGGAGGGGATGGGC----- mirL 18 2
--AGGAGGGAGGGGATGGGCCAAGTTC----- mirL 26 1
GGAGGAGGGAGGGGATGGG----- mirL 19 1
-----ACGCCCTTCCCCCCTTCTTCAC- mirR 23 20215
-----ACGCCCTTCCCCCCTTCTTC--- mirR 21 16783
-----ACGCCCTTCCCCCCTTCTT---- mirR 20 10890
-----ACGCCCTTCCCCCCTTCTTCA-- mirR 22 10134
-----ACGCCCTTCCCCCCTTC----- mirR 18 5486
-----ACGCCCTTCCCCCCTTCT----- mirR 19 4947
-----ACGCCCTTCCCCCCTTCTCACC mirR 24 405
-----AACGCCCTTCCCCCCTTCTTC--- mirR 22 102

```

```

-----AACGCCCTTCCCCCCTTCTT---- mirR 21 66
-----AACGCCCTTCCCCCCTTC----- mirR 19 43
-----AACGCCCTTCCCCCCTTCT---- mirR 20 19
-----AACGCCCTTCCCCCCTT----- mirR 18 18
-----CGCCCTTCCCCCCTTCTTCA-- mirR 21 9
-----AACGCCCTTCCCCCCTTCTTCA-- mirR 23 5
-----AACGCCCTTCCCCCCTTCTTCA- mirR 24 5
-----CGCCCTTCCCCCCTTCTTTC-- mirR 20 3
-----CGCCCTTCCCCCCTTCTT---- mirR 19 3
-----GCCCTTCCCCCCTTCTTTC-- mirR 19 3
-----CCCTTCCCCCCTTCTTTC-- mirR 18 2
-----GCCCTTCCCCCCTTCTT---- mirR 18 2
-----CGCCCTTCCCCCCTTCTTCA- mirR 22 2
-----GGAACGCCCTTCCCCCCTT----- mirR 18 2
-----GAACGCCCTTCCCCCCTTC----- mirR 20 1
-----GCCCTTCCCCCCTTCTTCA-- mirR 20 1
-----CCCTTCCCCCCTTCTTCA-- mirR 19 1

```

>mmu-mir-16-2

```

CTGACATGCTTGTTCCTACTTAGCAGCACGTAATATTGGCGTAGTGAATAAATATTAACACCAATATTATTGTGCTGCTTTAG species len reads
CTGACATGCTTGTTCCTACTTA----- morL 22 1
CTGACATGCTTGTTCCTACTC----- morL 20 1
-----TAGCAGCACGTAATATTGGC----- mirL 21 21117
-----TAGCAGCACGTAATATTGGCG----- mirL 22 18915
-----TAGCAGCACGTAATATTGGCGT----- mirL 23 11793
-----TAGCAGCACGTAATATTGG----- mirL 20 6728
-----TAGCAGCACGTAATATTG----- mirL 19 6328
-----AGCAGCACGTAATATTGGCGT----- mirL 22 1021
-----AGCAGCACGTAATATTGGC----- mirL 20 983
-----AGCAGCACGTAATATTGGCG----- mirL 21 745
-----AGCAGCACGTAATATTGG----- mirL 19 360
-----AGCAGCACGTAATATTGGCGTA----- mirL 23 197
-----CTAGCAGCACGTAATATTGGC----- mirL 22 13
-----GCAGCACGTAATATTGGCG----- mirL 20 6
-----GCAGCACGTAATATTGG----- mirL 18 4
-----GCAGCACGTAATATTGGC----- mirL 19 4
-----GCAGCACGTAATATTGGCGT----- mirL 21 2
-----CTAGCAGCACGTAATATTG----- mirL 20 2
-----CTAGCAGCACGTAATATTGGCGT----- mirL 24 2
-----CAGCACGTAATATTGGCG----- mirL 19 1
-----CTAGCAGCACGTAATATTGGCGTA----- mirL 25 1
-----CAGCACGTAATATTGGCGTAG----- mirL 22 1
-----CTAGCAGCACGTAATATTGG----- mirL 21 1
-----GCAGCACGTAATATTGGCGTAG----- mirL 23 1
-----ACCAATATTATTGTGCTGCTTT-- mirR 22 386
-----ACCAATATTATTGTGCTGCTT--- mirR 21 220

```

```

-----ACCAATATTATTGTGCTGC----- mirR 19 154
-----ACCAATATTATTGTGCTGCTTTA- mirR 23 56
-----ACCAATATTATTGTGCTGCT---- mirR 20 38
-----ACCAATATTATTGTGCTG----- mirR 18 25
-----CCAATATTATTGTGCTGCTTTA- mirR 22 17
-----ACCAATATTATTGTGCTGCTTTAG mirR 24 6
-----CCAATATTATTGTGCTGCTTT-- mirR 21 5
-----CCAATATTATTGTGCTGCTT--- mirR 20 4
-----CCAATATTATTGTGCTGCT---- mirR 18 2
-----CCAATATTATTGTGCTGCTTTAG mirR 23 2
-----CCAATATTATTGTGCTGCT---- mirR 19 2
-----AATATTATTGTGCTGCTTT-- mirR 19 1
-----AATATTATTGTGCTGCTTT-- mirR 18 1
-----CACCAATATTATTGTGCTGCT---- mirR 20 1

```

>mmu-mir-16-1

|                                                                                                                   | species | len | reads |
|-------------------------------------------------------------------------------------------------------------------|---------|-----|-------|
| TATGATAGCAATGTCAGCGGTGCCCTTAGCAGCACGTAATAATTGGCGTTAAGATTCTGAAATTACCTCCAGTATTGACTGTGCTGCTGAAGTAAGGTTGGCAATACTCTACA | morL    | 20  | 2     |
| -----TAGCAATGTCAGCGGTGCCCT-----                                                                                   | morL    | 19  | 1     |
| -----TAGCAATGTCAGCGGTGCC-----                                                                                     | morL    | 24  | 1     |
| TATGATAGCAATGTCAGCGGTGCC                                                                                          | morL    | 18  | 1     |
| -----GCAATGTCAGCGGTGCCCT-----                                                                                     | morL    | 18  | 1     |
| -----TAGCAATGTCAGCGGTGC-----                                                                                      | morL    | 18  | 1     |
| -----TAGCAGCACGTAATAATTGGC-----                                                                                   | mirL    | 21  | 21123 |
| -----TAGCAGCACGTAATAATTGGCG-----                                                                                  | mirL    | 22  | 18915 |
| -----TAGCAGCACGTAATAATTGGCGT-----                                                                                 | mirL    | 23  | 11793 |
| -----TAGCAGCACGTAATAATTGG-----                                                                                    | mirL    | 20  | 6744  |
| -----TAGCAGCACGTAATAATTG-----                                                                                     | mirL    | 19  | 6325  |
| -----AGCAGCACGTAATAATTGGCGT-----                                                                                  | mirL    | 22  | 1021  |
| -----AGCAGCACGTAATAATTGGC-----                                                                                    | mirL    | 20  | 985   |
| -----AGCAGCACGTAATAATTGGCG-----                                                                                   | mirL    | 21  | 745   |
| -----AGCAGCACGTAATAATTGG-----                                                                                     | mirL    | 19  | 359   |
| -----AGCAGCACGTAATAATTGGCGTT-----                                                                                 | mirL    | 23  | 281   |
| -----TTAGCAGCACGTAATAATTGGC-----                                                                                  | mirL    | 22  | 22    |
| -----GCAGCACGTAATAATTGGCG-----                                                                                    | mirL    | 20  | 6     |
| -----CTTAGCAGCACGTAATAATTGGC-----                                                                                 | mirL    | 23  | 5     |
| -----GCAGCACGTAATAATTGGC-----                                                                                     | mirL    | 19  | 4     |
| -----GCAGCACGTAATAATTGG-----                                                                                      | mirL    | 18  | 4     |
| -----TTAGCAGCACGTAATAATTGG-----                                                                                   | mirL    | 21  | 4     |
| -----TTAGCAGCACGTAATAATTG-----                                                                                    | mirL    | 20  | 4     |
| -----GCAGCACGTAATAATTGGCGTT-----                                                                                  | mirL    | 22  | 3     |
| -----CTTAGCAGCACGTAATAATTG-----                                                                                   | mirL    | 21  | 2     |
| -----TTAGCAGCACGTAATAATTGGCGT-----                                                                                | mirL    | 24  | 2     |
| -----GCAGCACGTAATAATTGGCGT-----                                                                                   | mirL    | 21  | 2     |
| -----CAGCACGTAATAATTGGCG-----                                                                                     | mirL    | 19  | 1     |
| -----TTAGCAGCACGTAATAATTGGCG-----                                                                                 | mirL    | 23  | 1     |
| -----TTAAGATTCTGAAATTACCT-----                                                                                    | loop    | 20  | 8     |

```

-----TAAGATTCTGAAATTACCT----- loop 19 3
-----TTAAGATTCTGAAATTACCTC----- loop 21 1
-----CCAGTATTGACTGTGCTGCTGAA----- mirR 23 33
-----CCAGTATTGACTGTGCTGCTGA----- mirR 22 32
-----CCAGTATTGACTGTGCTGC----- mirR 19 18
-----CCAGTATTGACTGTGCTGCTG----- mirR 21 9
-----TCCAGTATTGACTGTGCTGC----- mirR 20 9
-----TCCAGTATTGACTGTGCTGCTG----- mirR 22 5
-----TCCAGTATTGACTGTGCTGCTGA----- mirR 23 5
-----CTCCAGTATTGACTGTGCTG----- mirR 20 4
-----CTCCAGTATTGACTGTGCTGC----- mirR 21 4
-----TCCAGTATTGACTGTGCTGCT----- mirR 21 4
-----CCTCCAGTATTGACTGTGCTGC----- mirR 22 3
-----CTCCAGTATTGACTGTGCTGCTGA----- mirR 24 3
-----TCCAGTATTGACTGTGCT----- mirR 18 2
-----CTCCAGTATTGACTGTGCTGCTG----- mirR 23 2
-----CCAGTATTGACTGTGCTGCT----- mirR 20 2
-----CTCCAGTATTGACTGTGCTGCT----- mirR 22 2
-----TCCAGTATTGACTGTGCTGCTGAA----- mirR 24 2
-----CTCCAGTATTGACTGTGC----- mirR 18 2
-----CCAGTATTGACTGTGCTG----- mirR 18 2
-----CTCCAGTATTGACTGTGCTGCTGAAG----- mirR 26 1
-----CCAGTATTGACTGTGCTGCTGAAG----- mirR 24 1
-----AAGGTTGGCAATACTCTACA morR 20 1

```

>mmu-mir-300

```

CTTGAAGAGAGGTTATCCTTTGTGTTTGTCTTTACGCGAAATGAATATGCAAGGGCAAGCTCTCTTCGAGGAGCAAATGCTGCCTGGA species len reads
--TGAAGAGAGGTTATCCTTTGTGT----- mirL 23 624
--TTGAAGAGAGGTTATCCTTTGT----- mirL 22 404
--TGAAGAGAGGTTATCCTTTGTGTG----- mirL 24 277
--TGAAGAGAGGTTATCCTTTGT----- mirL 21 220
--AAGAGAGGTTATCCTTTGTGTGT----- mirL 23 188
--TTGAAGAGAGGTTATCCTTTGTGT----- mirL 24 185
--TGAAGAGAGGTTATCCTTTGTGTGT----- mirL 25 165
--TGAAGAGAGGTTATCCTTTGTG----- mirL 22 120
--TTGAAGAGAGGTTATCCTTTGTG----- mirL 23 84
--GAAGAGAGGTTATCCTTTGTGTGT----- mirL 24 66
--GAAGAGAGGTTATCCTTTGTGT----- mirL 22 57
--TTGAAGAGAGGTTATCCTTTGTGTG----- mirL 25 48
--TTGAAGAGAGGTTATCCTTTG----- mirL 21 33
--GAAGAGAGGTTATCCTTTGT----- mirL 20 29
--AGAGAGGTTATCCTTTGTGTGT----- mirL 22 23
--GAAGAGAGGTTATCCTTTGTGTG----- mirL 23 16
--AAGAGAGGTTATCCTTTGTGT----- mirL 21 11
--AAGAGAGGTTATCCTTTGTGTG----- mirL 22 11
--AAGAGAGGTTATCCTTTGTG----- mirL 20 11

```

```

---GAAGAGAGGTTATCCTTTGTG----- mirL 21 10
---AAGAGAGGTTATCCTTTGT----- mirL 19 7
---AGAGAGGTTATCCTTTGTGTGTT----- mirL 23 3
---AGAGAGGTTATCCTTTGTGT----- mirL 20 3
---AGAGAGGTTATCCTTTGTGTGTTG----- mirL 25 2
---AGAGAGGTTATCCTTTGTGTG----- mirL 21 2
CTTGAAGAGAGGTTATCCTTTGTG----- mirL 24 1
-----TGTTTGCTTTACGCGAAATGA----- loop 21 3
-----TGTTTGCTTTACGCGAAATG----- loop 20 1
-----TGTTTGCTTTACGCGAAATGAA----- loop 22 1
-----TATGCAAGGGCAAGCTCTCTTC----- mirR 22 36870
-----TATGCAAGGGCAAGCTCTC----- mirR 19 6904
-----TATGCAAGGGCAAGCTCTCTT----- mirR 21 5773
-----ATGCAAGGGCAAGCTCTCTTC----- mirR 21 2988
-----TATGCAAGGGCAAGCTCTCT----- mirR 20 2616
-----TATGCAAGGGCAAGCTCTCTTCG----- mirR 23 1917
-----TATGCAAGGGCAAGCTCT----- mirR 18 1138
-----TGCAAGGGCAAGCTCTCTTCGA----- mirR 22 837
-----TATGCAAGGGCAAGCTCTCTTCGA----- mirR 24 822
-----ATGCAAGGGCAAGCTCTCTT----- mirR 20 606
-----ATGCAAGGGCAAGCTCTCTTCG----- mirR 22 540
-----ATGCAAGGGCAAGCTCTCTTCGA----- mirR 23 473
-----TGCAAGGGCAAGCTCTCTTC----- mirR 20 359
-----TGCAAGGGCAAGCTCTCTTCG----- mirR 21 327
-----ATGCAAGGGCAAGCTCTC----- mirR 18 307
-----ATGCAAGGGCAAGCTCTCT----- mirR 19 249
-----TGCAAGGGCAAGCTCTCTT----- mirR 19 213
-----TGCAAGGGCAAGCTCTCTTCGAG----- mirR 23 123
-----ATATGCAAGGGCAAGCTCTCTTC----- mirR 23 62
-----ATATGCAAGGGCAAGCTCTCT----- mirR 21 42
-----GCAAGGGCAAGCTCTCTTC----- mirR 19 40
-----TGCAAGGGCAAGCTCTCT----- mirR 18 39
-----ATGCAAGGGCAAGCTCTCTTCGAG----- mirR 24 31
-----GCAAGGGCAAGCTCTCTTCGA----- mirR 21 30
-----ATATGCAAGGGCAAGCTCTCTT----- mirR 22 19
-----ATATGCAAGGGCAAGCTCTC----- mirR 20 15
-----TGCAAGGGCAAGCTCTCTTCGAGGA----- mirR 25 15
-----GCAAGGGCAAGCTCTCTTCG----- mirR 20 14
-----ATATGCAAGGGCAAGCTCT----- mirR 19 11
-----GCAAGGGCAAGCTCTCTT----- mirR 18 10
-----ATATGCAAGGGCAAGCTC----- mirR 18 8
-----GCAAGGGCAAGCTCTCTTCGAG----- mirR 22 8
-----AATATGCAAGGGCAAGCTCTCT----- mirR 22 2
-----ATATGCAAGGGCAAGCTCTCTTCG----- mirR 24 2
-----GCAAGGGCAAGCTCTCTTCGAGG----- mirR 23 2
-----GCAAGGGCAAGCTCTCTTCGAGGA----- mirR 24 1

```

```
-----CGAGGAGCAAATGCTGCCTGG- morR 21 1
-----GAGCAAATGCTGCCTGGA morR 18 1

>mmu-mir-137
TTGGCCCTCTGACTCTCTTCGGTGACGGGTATTCTTGGGTGGATAATACGGATTACGTTGTTATTGCTTAAGAATACGCGTAGTCGAGGAGAGTACCAGCGG species len reads
-----TCTGACTCTCTTCGGTGAC----- morL 19 9
-----TCTGACTCTCTTCGGTGACG----- morL 20 6
-----TCTGACTCTCTTCGGTGA----- morL 18 3
TTGGCCCTCTGACTCTCTTCGGTGA----- morL 25 1
-----CTGACTCTCTTCGGTGAC----- morL 18 1
-----CTGACTCTCTTCGGTGACG----- morL 19 1
TTGGCCCTCTGACTCTCTTCGGTGAC----- morL 26 1
-----ACGGGTATTCTTGGGTGGATAA----- mirL 22 200
-----ACGGGTATTCTTGGGTGGAT----- mirL 20 180
-----ACGGGTATTCTTGGGTGGATA----- mirL 21 102
-----ACGGGTATTCTTGGGTGGATAAT----- mirL 23 89
-----ACGGGTATTCTTGGGTGG----- mirL 18 62
-----GACGGGTATTCTTGGGTGGAT----- mirL 21 9
-----GACGGGTATTCTTGGGTGG----- mirL 19 8
-----GACGGGTATTCTTGGGTGGATA----- mirL 22 6
-----GACGGGTATTCTTGGGTGGA----- mirL 20 3
-----GGGTATTCTTGGGTGGATAAATAC----- mirL 23 3
-----GGTATTCTTGGGTGGATAAT----- mirL 20 1
-----GGGTATTCTTGGGTGGATAA----- mirL 20 1
-----GGTATTCTTGGGTGGATA----- mirL 18 1
-----GACGGGTATTCTTGGGTGGATAA----- mirL 23 1
-----TTATTGCTTAAGAATACGCGTA----- mirR 22 14609
-----TTATTGCTTAAGAATACGCGTAG----- mirR 23 9304
-----TTATTGCTTAAGAATACGCGT----- mirR 21 7527
-----TATTGCTTAAGAATACGCGTAG----- mirR 22 7444
-----TTATTGCTTAAGAATACGC----- mirR 19 6141
-----ATTGCTTAAGAATACGCGTAG----- mirR 21 5423
-----TATTGCTTAAGAATACGCGT----- mirR 20 2742
-----TTATTGCTTAAGAATACGCG----- mirR 20 1330
-----TATTGCTTAAGAATACGCGTAGTC----- mirR 24 1109
-----TATTGCTTAAGAATACGCGTA----- mirR 21 1108
-----TATTGCTTAAGAATACGC----- mirR 18 1083
-----TATTGCTTAAGAATACGCGTAGT----- mirR 23 913
-----TTATTGCTTAAGAATACG----- mirR 18 825
-----TTATTGCTTAAGAATACGCGTAGT----- mirR 24 533
-----TATTGCTTAAGAATACGCG----- mirR 19 520
-----ATTGCTTAAGAATACGCGTAGTC----- mirR 23 444
-----ATTGCTTAAGAATACGCGTAGT----- mirR 22 353
-----ATTGCTTAAGAATACGCGT----- mirR 19 303
-----ATTGCTTAAGAATACGCGTA----- mirR 20 283
-----TTGCTTAAGAATACGCGTAG----- mirR 20 129
```

```

-----TTGCTTAAGAATACGCGTAGT----- mirR 21 58
-----TTGCTTAAGAATACGCGTAGTC----- mirR 22 58
-----ATTGCTTAAGAATACGCG----- mirR 18 52
-----TTGCTTAAGAATACGCGTA----- mirR 19 10
-----TTGCTTAAGAATACGCGT----- mirR 18 9
-----GTTATTGCTTAAGAATACGCGTA----- mirR 23 5
-----GTTATTGCTTAAGAATACGCGT----- mirR 22 2
-----GTTATTGCTTAAGAATACGC----- mirR 20 2
-----GTTATTGCTTAAGAATACG----- mirR 19 1
-----TGTATTGCTTAAGAATACGCGTAG----- mirR 25 1
-----TGTATTGCTTAAGAATACGCGT----- mirR 23 1
-----GTTATTGCTTAAGAATACGCGTAGTC----- mirR 26 1
-----GTTATTGCTTAAGAATACGCGTAG----- mirR 24 1
-----GTTATTGCTTAAGAATAC----- mirR 18 1
-----CGAGGAGAGTACCAGCGG morR 18 3

```

>mmu-mir-200b

| Species | len   | reads                                                           |
|---------|-------|-----------------------------------------------------------------|
| mirL 21 | 1120  | CCATCTTACTGGGCAGCATTGGATAGTGTCTGATCTCTAATACTGCCTGGTAATGATGACGGC |
| mirL 22 | 655   | -CATCTTACTGGGCAGCATTGG-----                                     |
| mirL 20 | 476   | -CATCTTACTGGGCAGCATTG-----                                      |
| mirL 23 | 172   | -CATCTTACTGGGCAGCATTGGAT-----                                   |
| mirL 21 | 91    | --ATCTTACTGGGCAGCATTGGA-----                                    |
| mirL 20 | 82    | --ATCTTACTGGGCAGCATTGG-----                                     |
| mirL 19 | 75    | -CATCTTACTGGGCAGCATT-----                                       |
| mirL 22 | 70    | --ATCTTACTGGGCAGCATTGGAT-----                                   |
| mirL 19 | 29    | --ATCTTACTGGGCAGCATTG-----                                      |
| mirL 23 | 28    | --ATCTTACTGGGCAGCATTGGATA-----                                  |
| mirL 21 | 3     | CCATCTTACTGGGCAGCATTG-----                                      |
| mirL 22 | 2     | CCATCTTACTGGGCAGCATTGG-----                                     |
| mirL 23 | 2     | ---TCTTACTGGGCAGCATTGGATAG-----                                 |
| mirL 18 | 1     | CCATCTTACTGGGCAGCA-----                                         |
| mirL 18 | 1     | ---TCTTACTGGGCAGCATTG-----                                      |
| mirL 21 | 1     | ---TCTTACTGGGCAGCATTGGAT-----                                   |
| mirL 23 | 1     | CCATCTTACTGGGCAGCATTGGA-----                                    |
| mirL 19 | 1     | ----CTTACTGGGCAGCATTGGA-----                                    |
| mirR 23 | 20706 | -----TAATACTGCCTGGTAATGATGAC---                                 |
| mirR 22 | 12873 | -----TAATACTGCCTGGTAATGATGA----                                 |
| mirR 21 | 12725 | -----TAATACTGCCTGGTAATGATG-----                                 |
| mirR 21 | 3436  | -----AATACTGCCTGGTAATGATGA----                                  |
| mirR 20 | 2646  | -----TAATACTGCCTGGTAATGAT-----                                  |
| mirR 19 | 1606  | -----TAATACTGCCTGGTAATGA-----                                   |
| mirR 20 | 1513  | -----AATACTGCCTGGTAATGATG-----                                  |
| mirR 22 | 1031  | -----AATACTGCCTGGTAATGATGAC---                                  |
| mirR 18 | 738   | -----TAATACTGCCTGGTAATG-----                                    |
| mirR 24 | 705   | -----TAATACTGCCTGGTAATGATGACG--                                 |



```

-----AATACTGCCTGGTAATGAT----- mirR 19 333
-----AATACTGCCTGGTAATGA----- mirR 18 155
-----AATACTGCCTGGTAATGATGACG-- mirR 23 143
-----AATACTGCCTGGTAATGATGACGG- mirR 24 30
-----CTAATACTGCCTGGTAATGAT----- mirR 21 16
-----ATACTGCCTGGTAATGATGA----- mirR 20 12
-----CTAATACTGCCTGGTAATGATGAC-- mirR 24 11
-----CTAATACTGCCTGGTAATGA----- mirR 20 10
-----ATACTGCCTGGTAATGATG----- mirR 19 8
-----CTAATACTGCCTGGTAATGATGA----- mirR 23 8
-----CTAATACTGCCTGGTAATGATG----- mirR 22 7
-----TCTAATACTGCCTGGTAATGA----- mirR 21 7
-----ATACTGCCTGGTAATGATGAC-- mirR 21 5
-----ATACTGCCTGGTAATGATGACG-- mirR 22 4
-----TCTAATACTGCCTGGTAATGATGAC-- mirR 25 3
-----ATACTGCCTGGTAATGATGACGG- mirR 23 3
-----TCTAATACTGCCTGGTAATGAT----- mirR 22 2
-----TACTGCCTGGTAATGATGAC-- mirR 20 2
-----ATACTGCCTGGTAATGATGACGGC mirR 24 2
-----CTAATACTGCCTGGTAAT----- mirR 18 2
-----CTAATACTGCCTGGTAATG----- mirR 19 1
-----TACTGCCTGGTAATGATGACG-- mirR 21 1
-----CTCTAATACTGCCTGGTAATG----- mirR 21 1

```

>mmu-mir-361

```

AGCTTATCAGAATCTCCAGGGGTACTTAGTATTTGAAAAGTCCCCAGGTGTGATTCTGATTTGTTTCCCTCTCCTGCTCCTCCTCCTCT species len reads
---TTATCAGAATCTCCAGGGGTAC----- mirL 22 34870
---TTATCAGAATCTCCAGGGGTAC----- mirL 21 3769
---TATCAGAATCTCCAGGGGTAC----- mirL 21 3595
---TTATCAGAATCTCCAGGGGTACT----- mirL 23 1479
---TTATCAGAATCTCCAGGGGT----- mirL 20 1291
---TTATCAGAATCTCCAGGGG----- mirL 19 787
---TATCAGAATCTCCAGGGGTA----- mirL 20 539
---TATCAGAATCTCCAGGGGTACT----- mirL 22 427
---TATCAGAATCTCCAGGGGT----- mirL 19 163
---TATCAGAATCTCCAGGGG----- mirL 18 82
---ATCAGAATCTCCAGGGGTAC----- mirL 20 24
---CTTATCAGAATCTCCAGGGGTAC----- mirL 23 17
---TCAGAATCTCCAGGGGTAC----- mirL 19 5
---CTTATCAGAATCTCCAGGGGTAC----- mirL 22 5
---ATCAGAATCTCCAGGGGTACT----- mirL 21 4
---ATCAGAATCTCCAGGGGTA----- mirL 19 2
---CTTATCAGAATCTCCAGGGGT----- mirL 21 2
---ATCAGAATCTCCAGGGGT----- mirL 18 1
---CTTATCAGAATCTCCAGGG----- mirL 19 1
---TCAGAATCTCCAGGGGTA----- mirL 18 1

```

```

-GCTTATCAGAATCTCCAGGGGTACT----- mirL 25 1
AGCTTATCAGAATCTCCAGGGGTAC----- mirL 25 1
-GCTTATCAGAATCTCCAGGGGTAC----- mirL 24 1
-----TACTTAGTATTTGAAAAGTCC----- loop 21 1
-----CTTAGTATTTGAAAAGTC----- loop 18 1
-----TACTTAGTATTTGAAAAG----- loop 18 1
-----CCCCCAGGTGTGATTCTGATTTGT----- mirR 24 2214
-----TCCCCCAGGTGTGATTCTGATTT----- mirR 23 1930
-----TCCCCCAGGTGTGATTCTGATT----- mirR 22 1427
-----CCCCCAGGTGTGATTCTGATTT----- mirR 22 1308
-----CCCCCAGGTGTGATTCTGATTTGTT----- mirR 25 1070
-----TCCCCCAGGTGTGATTCTGATTTG----- mirR 24 909
-----CCCCCAGGTGTGATTCTGATTTG----- mirR 23 881
-----TCCCCCAGGTGTGATTCTGATTTGT----- mirR 25 779
-----TCCCCCAGGTGTGATTCTG----- mirR 19 482
-----CCCCCAGGTGTGATTCTGAT----- mirR 20 480
-----CCCCCAGGTGTGATTCTGATT----- mirR 21 445
-----TCCCCCAGGTGTGATTCTGA----- mirR 20 438
-----TCCCCCAGGTGTGATTCT----- mirR 18 382
-----CCCCCAGGTGTGATTCTGA----- mirR 19 227
-----CCCAGGTGTGATTCTGATTTGT----- mirR 23 4
-----CCCCAGGTGTGATTCTGATTT----- mirR 21 3
-----CCCAGGTGTGATTCTGATTTG----- mirR 22 2
-----GTCCCCCAGGTGTGATTCTGATT----- mirR 23 1
-----GTCCCCCAGGTGTGATTCTGATTT----- mirR 24 1
-----CCCAGGTGTGATTCTGATTTGT----- mirR 22 1
-----AGTCCCCCAGGTGTGATTCTGAT----- mirR 23 1
-----CCCAGGTGTGATTCTGATTTG----- mirR 21 1
-----TTCCCTCTCCTGCTCCTC----- morR 18 2
-----TTCCCTCTCCTGCTCCTCCTCCT morR 26 1

```

>mmu-mir-543

```

TGAGAAGTTGCCCGCGTGTTTTTTCGCTTTATATGTGACGAAACATTCGCGGTGCACTTCTTTTTTC species len reads
---GAAGTTGCCCGCGTGTTTTT----- mirL 20 207
---AAGTTGCCCGCGTGTTTTT----- mirL 19 151
---GAAGTTGCCCGCGTGTTTTT----- mirL 21 139
---AGTTGCCCGCGTGTTTTTTCGCT----- mirL 22 100
---GAAGTTGCCCGCGTGTTT----- mirL 18 94
---AAGTTGCCCGCGTGTTTTTCG----- mirL 21 83
---AAGTTGCCCGCGTGTTTTT----- mirL 20 73
---GAAGTTGCCCGCGTGTTTTTCG----- mirL 22 58
---GAAGTTGCCCGCGTGTTTTT----- mirL 19 42
---AGTTGCCCGCGTGTTTTT----- mirL 19 37
---AAGTTGCCCGCGTGTTTTTCG----- mirL 22 31
---AGTTGCCCGCGTGTTTTT----- mirL 18 29
---AGTTGCCCGCGTGTTTTTCG----- mirL 21 21

```

```
---AAGTTGCCCGCGTGTTTT----- mirL 18 21
TGAGAAGTTGCCCGCGTGTTF----- mirL 21 16
TGAGAAGTTGCCCGCGTGTTTTTC----- mirL 24 15
----AGTTGCCCGCGTGTTTTCG----- mirL 20 14
TGAGAAGTTGCCCGCGTGTTTT----- mirL 22 6
TGAGAAGTTGCCCGCGTGTTF----- mirL 20 4
TGAGAAGTTGCCCGCGTG----- mirL 18 3
-GAGAAGTTGCCCGCGTGTTF----- mirL 21 1
-GAGAAGTTGCCCGCGTGTTF----- mirL 20 1
-GAGAAGTTGCCCGCGTGTTTTC----- mirL 23 1
-----AACATTGCGGGTGCCTTCTT----- mirR 22 30585
-----AACATTGCGGGTGCCTTCTTT----- mirR 23 9712
-----AACATTGCGGGTGCCTTCT----- mirR 20 6696
-----AACATTGCGGGTGCCTTCT----- mirR 21 4928
-----AACATTGCGGGTGCCTT----- mirR 19 3881
-----AACATTGCGGGTGCCT----- mirR 18 1142
-----AACATTGCGGGTGCCTTCTTTT----- mirR 24 798
-----AACATTGCGGGTGCCTTCTTT----- mirR 22 193
-----ACATTGCGGGTGCCTTCTTTT----- mirR 22 125
-----ACATTGCGGGTGCCTTCTTT----- mirR 21 104
-----AACATTGCGGGTGCCTTCTT----- mirR 21 86
-----AACATTGCGGGTGCCTTCT----- mirR 19 82
-----CGAAACATTGCGGGTGCCTTCT----- mirR 22 53
-----AACATTGCGGGTGCCTTCTTTT----- mirR 23 45
-----ACATTGCGGGTGCCTTCT----- mirR 18 43
-----GAAACATTGCGGGTGCCTTCTT----- mirR 23 29
-----ACATTGCGGGTGCCTTCTTTTTC----- mirR 24 24
-----AACATTGCGGGTGCCTTCT----- mirR 20 23
-----GAAACATTGCGGGTGCCTTCT----- mirR 22 23
-----AACATTGCGGGTGCCTT----- mirR 18 22
-----GAAACATTGCGGGTGCCTTCT----- mirR 21 20
-----ACATTGCGGGTGCCTTCT----- mirR 19 20
-----ACATTGCGGGTGCCTTCTT----- mirR 20 19
-----CGAAACATTGCGGGTGCCTT----- mirR 21 16
-----CGAAACATTGCGGGTGCCT----- mirR 19 12
-----CGAAACATTGCGGGTGCCTTCT----- mirR 23 9
-----ACATTGCGGGTGCCTTCTTTT----- mirR 23 8
-----CATTGCGGGTGCCTTCTT----- mirR 19 7
-----CGAAACATTGCGGGTGCCT----- mirR 20 6
-----CATTGCGGGTGCCTTCTTT----- mirR 20 5
-----GAAACATTGCGGGTGCCT----- mirR 18 4
-----GAAACATTGCGGGTGCCT----- mirR 19 4
-----GAAACATTGCGGGTGCCTT----- mirR 20 4
-----CATTGCGGGTGCCTTCTTTTTC----- mirR 23 3
-----ACGAAACATTGCGGGTGCCTT----- mirR 22 3
-----ACGAAACATTGCGGGTGCCTTCT----- mirR 23 3
```

```

-----ACGAAACATTCGCGGTGCACTTCT----- mirR 24 3
-----GAAACATTCGCGGTGCACTTCTTT--- mirR 24 2
-----CATTGCGGTGCACTTCTTTT-- mirR 21 2
-----CATTGCGGTGCACTTCTTTT- mirR 22 2
-----ACGAAACATTCGCGGTGCACT----- mirR 21 2
-----AACATTCGCGGTGCACTTCTTTTTC mirR 25 2
-----CGAAACATTCGCGGTGCA----- mirR 18 2
-----ACGAAACATTCGCGGTGCAC----- mirR 20 1
-----CGAAACATTCGCGGTGCACTTCTTT--- mirR 25 1
-----ACGAAACATTCGCGGTGC----- mirR 18 1

```

>mmu-mir-381

| AAAGCGAGGTTGCCCTTTGTATATTCGGTTTATTGACATGGAATATACAAGGGCAAGCTCTCTGTGAGT | species | len | reads |
|-----------------------------------------------------------------------|---------|-----|-------|
| --AGCGAGGTTGCCCTTTGTATAT-----                                         | mirL    | 22  | 666   |
| --AGCGAGGTTGCCCTTTGTAT-----                                           | mirL    | 20  | 184   |
| --AGCGAGGTTGCCCTTTGTATATTC-----                                       | mirL    | 24  | 114   |
| --AGCGAGGTTGCCCTTTGTATA-----                                          | mirL    | 21  | 107   |
| --AGCGAGGTTGCCCTTTGT-----                                             | mirL    | 18  | 78    |
| ---CGAGGTTGCCCTTTGTATATTC-----                                        | mirL    | 22  | 11    |
| ---CGAGGTTGCCCTTTGTATAT-----                                          | mirL    | 20  | 6     |
| ---GCGAGGTTGCCCTTTGTATAT-----                                         | mirL    | 21  | 3     |
| ---GCGAGGTTGCCCTTTGTAT-----                                           | mirL    | 19  | 2     |
| ---CGAGGTTGCCCTTTGTAT-----                                            | mirL    | 18  | 2     |
| ---GAGGTTGCCCTTTGTATA-----                                            | mirL    | 18  | 2     |
| ---GCGAGGTTGCCCTTTGTATA-----                                          | mirL    | 18  | 2     |
| ---CGAGGTTGCCCTTTGTATATTC-----                                        | mirL    | 21  | 2     |
| -AAGCGAGGTTGCCCTTTGTATAT-----                                         | mirL    | 23  | 1     |
| -AAGCGAGGTTGCCCTTTGTATA-----                                          | mirL    | 20  | 1     |
| AAAGCGAGGTTGCCCTTTGT-----                                             | mirL    | 20  | 1     |
| ----GAGGTTGCCCTTTGTATAT-----                                          | mirL    | 19  | 1     |
| -AAGCGAGGTTGCCCTTTGTAT-----                                           | mirL    | 21  | 1     |
| -AAGCGAGGTTGCCCTTTGT-----                                             | mirL    | 19  | 1     |
| -----TATACAAGGGCAAGCTCTCTGT----                                       | mirR    | 22  | 42282 |
| -----TATACAAGGGCAAGCTCTC-----                                         | mirR    | 19  | 4075  |
| -----TATACAAGGGCAAGCTCTCTG-----                                       | mirR    | 21  | 3473  |
| -----ATACAAGGGCAAGCTCTCTGT----                                        | mirR    | 21  | 3082  |
| -----TATACAAGGGCAAGCTCTCTGTG---                                       | mirR    | 23  | 1504  |
| -----TATACAAGGGCAAGCTCTCT-----                                        | mirR    | 20  | 864   |
| -----TATACAAGGGCAAGCTCTCTGTGA--                                       | mirR    | 24  | 478   |
| -----ATACAAGGGCAAGCTCTCTG-----                                        | mirR    | 20  | 302   |
| -----TATACAAGGGCAAGCTCT-----                                          | mirR    | 18  | 286   |
| -----ATATACAAGGGCAAGCTCTCTGT----                                      | mirR    | 23  | 169   |
| -----ATACAAGGGCAAGCTCTC-----                                          | mirR    | 18  | 130   |
| -----ATACAAGGGCAAGCTCTCTGTG---                                        | mirR    | 22  | 129   |
| -----ATATACAAGGGCAAGCTCTCTG----                                       | mirR    | 22  | 73    |
| -----ATACAAGGGCAAGCTCTCT-----                                         | mirR    | 19  | 66    |

```
-----ATATACAAGGGCAAGCTCTC----- mirR 20 50
-----ATACAAGGGCAAGCTCTCTGTGA-- mirR 23 49
-----ATATACAAGGGCAAGCTCTCT----- mirR 21 41
-----ATATACAAGGGCAAGCTCT----- mirR 19 18
-----ACAAGGGCAAGCTCTCTGT--- mirR 19 16
-----TACAAGGGCAAGCTCTCTGT--- mirR 20 16
-----TACAAGGGCAAGCTCTCTGTGA-- mirR 22 15
-----ATATACAAGGGCAAGCTC----- mirR 18 9
-----ATATACAAGGGCAAGCTCTCTGTG-- mirR 24 6
-----ATACAAGGGCAAGCTCTCTGTGAGT mirR 25 4
-----AATATACAAGGGCAAGCTCTCT----- mirR 22 3
-----ACAAGGGCAAGCTCTCTGTGA-- mirR 21 3
-----TACAAGGGCAAGCTCTCTG--- mirR 19 3
-----ACAAGGGCAAGCTCTCTG--- mirR 18 2
-----TACAAGGGCAAGCTCTCT----- mirR 18 1
-----TACAAGGGCAAGCTCTCTGTG--- mirR 21 1
-----AATATACAAGGGCAAGCTCTC----- mirR 21 1
```

>mmu-mir-151

```
CCCTCGAGGAGCTCACAGTCTAGTATGTCTCCTCCCTACTAGACTGAGGCTCCTTGAGGACAG species len reads
---TCGAGGAGCTCACAGTCTAGT----- mirL 21 19762
---TCGAGGAGCTCACAGTCTAGTA----- mirL 22 15873
---TCGAGGAGCTCACAGTCTAG----- mirL 20 9477
---TCGAGGAGCTCACAGTCTAGTAT----- mirL 23 4462
---TCGAGGAGCTCACAGTCTA----- mirL 19 3125
---CGAGGAGCTCACAGTCTAGT----- mirL 20 704
---CGAGGAGCTCACAGTCTAGTA----- mirL 21 578
---CGAGGAGCTCACAGTCTAG----- mirL 19 334
---CGAGGAGCTCACAGTCTAGTAT----- mirL 22 220
---CTCGAGGAGCTCACAGTCTAGT----- mirL 22 116
---CGAGGAGCTCACAGTCTA----- mirL 18 84
---CTCGAGGAGCTCACAGTCTAGTA----- mirL 23 60
---CTCGAGGAGCTCACAGTC----- mirL 18 22
---CTCGAGGAGCTCACAGTCTAG----- mirL 21 21
---CTCGAGGAGCTCACAGTCT----- mirL 19 17
-----GAGGAGCTCACAGTCTAGTA----- mirL 20 4
-----GAGGAGCTCACAGTCTAGT----- mirL 19 3
---CCTCGAGGAGCTCACAGTCTAGTAT----- mirL 25 3
CCCTCGAGGAGCTCACAGTCTAG----- mirL 23 2
---CCTCGAGGAGCTCACAGTCTAGTA----- mirL 24 2
-----AGGAGCTCACAGTCTAGT----- mirL 18 2
---CCTCGAGGAGCTCACAGTCTAG----- mirL 22 2
---CCTCGAGGAGCTCACAGT----- mirL 18 1
CCCTCGAGGAGCTCACAGTCTA----- mirL 22 1
-----GAGGAGCTCACAGTCTAG----- mirL 18 1
CCCTCGAGGAGCTCACAGTC----- mirL 20 1
```

```

-CCTCGAGGAGCTCACAGTCTAGT----- mirL 23 1
----GAGGAGCTCACAGTCTAGTATG----- mirL 22 1
CCCTCGAGGAGCTCACAGTCT----- mirL 21 1
-----CTAGACTGAGGCTCCTTGA----- mirR 19 845
-----CTAGACTGAGGCTCCTTGAGGAC-- mirR 23 481
-----CTAGACTGAGGCTCCTTGAG----- mirR 20 408
-----CTAGACTGAGGCTCCTTGAGG--- mirR 21 387
-----CTAGACTGAGGCTCCTTG----- mirR 18 244
-----CTAGACTGAGGCTCCTTGAGGA-- mirR 22 192
-----CTAGACTGAGGCTCCTTGAGGACA- mirR 24 100
-----ACTAGACTGAGGCTCCTTGA----- mirR 20 36
-----TACTAGACTGAGGCTCCTTGA----- mirR 21 22
-----ACTAGACTGAGGCTCCTTGAG--- mirR 21 13
-----TAGACTGAGGCTCCTTGAGGAC-- mirR 22 11
-----ACTAGACTGAGGCTCCTTG----- mirR 19 10
-----ACTAGACTGAGGCTCCTTGAGG--- mirR 22 10
-----ACTAGACTGAGGCTCCTT----- mirR 18 7
-----TACTAGACTGAGGCTCCTTGAG---- mirR 22 7
-----TAGACTGAGGCTCCTTGAG---- mirR 19 5
-----ACTAGACTGAGGCTCCTTGAGGAC-- mirR 24 5
-----TACTAGACTGAGGCTCCTT----- mirR 19 5
-----TACTAGACTGAGGCTCCT----- mirR 18 5
-----TAGACTGAGGCTCCTTGAGG--- mirR 20 4
-----ACTAGACTGAGGCTCCTTGAGGA--- mirR 23 4
-----AGACTGAGGCTCCTTGAGGAC-- mirR 21 4
-----AGACTGAGGCTCCTTGAGGACA- mirR 22 3
-----TACTAGACTGAGGCTCCTTG----- mirR 20 3
-----TAGACTGAGGCTCCTTGA----- mirR 18 3
-----AGACTGAGGCTCCTTGAGGA--- mirR 20 2
-----TAGACTGAGGCTCCTTGAGGACA- mirR 23 2
-----AGACTGAGGCTCCTTGAGGACAG mirR 23 1
-----AGACTGAGGCTCCTTGAGG---- mirR 19 1
-----GACTGAGGCTCCTTGAGG---- mirR 18 1
-----AGACTGAGGCTCCTTGAG---- mirR 18 1
-----TAGACTGAGGCTCCTTGAGGA--- mirR 21 1
-----TACTAGACTGAGGCTCCTTGAGG--- mirR 23 1

>mmu-mir-666
AGCGGGCACAGCTGTGAGAGCCCCCTAGGTACAGCGGGGCTGCAGCGTGATCGCCTGCTCACGCACAGGAAGTGACGAC species len reads
AGCGGGCACAGCTGTGAGA----- mirL 19 235
AGCGGGCACAGCTGTGAGAGCCCC----- mirL 25 217
AGCGGGCACAGCTGTGAGAGCCC----- mirL 23 182
AGCGGGCACAGCTGTGAGAG----- mirL 20 173
AGCGGGCACAGCTGTGAGAG----- mirL 21 168
---GGGCACAGCTGTGAGAGCCCC----- mirL 21 1
---GGGCACAGCTGTGAGAGCCCC----- mirL 22 1

```

```

-GCGGGCACAGCTGTGAGAGCCCC----- mirL 24 1
--CGGGCACAGCTGTGAGAGCCC----- mirL 21 1
-----GGCTGCAGCGTGATCGCCTGCTC----- mirR 23 21372
-----GGCTGCAGCGTGATCGCCTGC----- mirR 21 10220
-----GGCTGCAGCGTGATCGCC----- mirR 18 6793
-----GGCTGCAGCGTGATCGCCTGCTCA----- mirR 24 4258
-----GGCTGCAGCGTGATCGCCTGCT----- mirR 22 3650
-----GGCTGCAGCGTGATCGCCT----- mirR 19 2848
-----GCTGCAGCGTGATCGCCTGCTC----- mirR 22 2468
-----GGCTGCAGCGTGATCGCCTGCTCAC----- mirR 25 2002
-----GCTGCAGCGTGATCGCCTGC----- mirR 20 612
-----GCTGCAGCGTGATCGCCTGCTCA----- mirR 23 518
-----GCTGCAGCGTGATCGCCTGCT----- mirR 21 397
-----GCTGCAGCGTGATCGCCTGCTCAC----- mirR 24 303
-----GCTGCAGCGTGATCGCCT----- mirR 18 268
-----GCTGCAGCGTGATCGCCTG----- mirR 19 64
-----CTGCAGCGTGATCGCCTGCTCA----- mirR 22 6
-----GGGCTGCAGCGTGATCGCCTGCTC----- mirR 24 6
-----GGGCTGCAGCGTGATCGCCTGC----- mirR 22 4
-----CTGCAGCGTGATCGCCTGC----- mirR 19 4
-----CTGCAGCGTGATCGCCTGCTCAC----- mirR 23 4
-----GGGGCTGCAGCGTGATCG----- mirR 18 3
-----GGGGCTGCAGCGTGATCGCCTGCTC----- mirR 25 3
-----CTGCAGCGTGATCGCCTGCTC----- mirR 21 2
-----GGGCTGCAGCGTGATCGCC----- mirR 19 2
-----CTGCAGCGTGATCGCCTGCT----- mirR 20 2
-----TGCAGCGTGATCGCCTGCTC----- mirR 20 1
-----GGGGCTGCAGCGTGATCGCC----- mirR 20 1
-----TGCAGCGTGATCGCCTGCTCACGC----- mirR 24 1
-----GGGCTGCAGCGTGATCGCCT----- mirR 20 1
-----GGGGCTGCAGCGTGATCGC----- mirR 19 1
-----TGCAGCGTGATCGCCTGCTCA----- mirR 21 1
-----CGGGCTGCAGCGTGATC----- mirR 18 1
-----GGGCTGCAGCGTGATCGCCTGCTCA----- mirR 26 1
-----ACGCACAGGAAGTGACGAC morR 19 2

```

>mmu-mir-182

```

TGGCTGCTGGAGGCCTCCACCATTTTGGCAATGGTAGAACTCACACCCGGTAAGGTAATGGGACCCGGTGGTTCTAGACTTGCCAACATGGTGTAAAGTGCTGAGC species len reads
TGGCTGCTGGAGGCCTCCACCATTTTGGCAATGGTAGAACTCACAC----- morL 22 1
-----TTTGGCAATGGTAGAACTCACAC----- mirL 23 20204
-----TTTGGCAATGGTAGAACTCAC----- mirL 21 17453
-----TTTGGCAATGGTAGAACTCACACC----- mirL 24 7122
-----TTTGGCAATGGTAGAACTCACA----- mirL 22 5813
-----TTTGGCAATGGTAGAACTCA----- mirL 20 3611
-----TTGGCAATGGTAGAACTCACAC----- mirL 22 778
-----TTGGCAATGGTAGAACTCAC----- mirL 20 657

```

```

-----TTGGCAATGGTAGAACTCACACC----- mirL 23 354
-----TTGGCAATGGTAGAACTCACA----- mirL 21 283
-----TTGGCAATGGTAGAACTCACACCG----- mirL 24 174
-----TGGCAATGGTAGAACTCAC----- mirL 19 11
-----TGGCAATGGTAGAACTCACAC----- mirL 21 7
-----TTTTGGCAATGGTAGAACTCAC----- mirL 22 6
-----TTTTGGCAATGGTAGAACTCACACC----- mirL 25 5
-----TTTTTTGGCAATGGTAGAACTCAC----- mirL 23 3
-----TGGCAATGGTAGAACTCACACC----- mirL 22 3
-----GGCAATGGTAGAACTCACACC----- mirL 21 3
-----TTTTGGCAATGGTAGAAC----- mirL 18 2
-----GGCAATGGTAGAACTCACA----- mirL 19 2
-----GGCAATGGTAGAACTCAC----- mirL 18 2
-----TTTTGGCAATGGTAGAACTCACA----- mirL 23 2
-----TGGCAATGGTAGAACTCACACCG----- mirL 23 2
-----GGCAATGGTAGAACTCACAC----- mirL 20 2
-----TTTTGGCAATGGTAGAACTC----- mirL 20 1
-----GGCAATGGTAGAACTCACACCGG----- mirL 23 1
-----TTTTTTGGCAATGGTAGAACT----- mirL 20 1
-----TGGCAATGGTAGAACTCACACCGGT----- mirL 25 1
-----ATTTTTGGCAATGGTAGAACTCAC----- mirL 24 1
-----TGTTTCTAGACTTGCCAAC----- mirR 20 45
-----TGTTTCTAGACTTGCCAAC----- mirR 19 13
-----GGTGGTTCTAGACTTGCCAAC----- mirR 22 5
-----GTGGTTCTAGACTTGCCAAC----- mirR 21 4
-----TGTTTCTAGACTTGCCAAC----- mirR 21 4
-----GTGGTTCTAGACTTGCCAAC----- mirR 20 2
-----GGTTCTAGACTTGCCAAC----- mirR 19 2
-----GGTTCTAGACTTGCCAAC----- mirR 20 1
-----GGTGGTTCTAGACTTGCCAAC----- mirR 21 1
-----GGTGGTTCTAGACTTGCCAAC----- mirR 23 1
-----GTGGTTCTAGACTTGCCAAC----- mirR 22 1
-----GGTGGTTCTAGACTTGCC----- mirR 18 1
-----GGTTCTAGACTTGCCAAC----- mirR 18 1
-----CTATGGTGTAAAGTGCTGAGC morR 20 1

```

>mmu-mir-22

```

CTCACCTGGCTGAGCCGAGTAGTTCTTCAGTGGCAAGCTTTATGTCCTGACCCAGCTAAAGCTGCCAGTTGAAGAACTGTTGC species len reads
CTCACCTGGCTGAGCCGC----- morL 18 2
-----AGTTCTTCAGTGGCAAGCTTTA----- mirL 22 13793
-----AGTTCTTCAGTGGCAAGCTTT----- mirL 21 12140
-----AGTTCTTCAGTGGCAAGC----- mirL 18 2175
-----AGTTCTTCAGTGGCAAGCTTTAT----- mirL 23 1750
-----AGTTCTTCAGTGGCAAGCT----- mirL 19 1291
-----GTTCTTCAGTGGCAAGCTTTA----- mirL 21 20
-----TAGTTCTTCAGTGGCAAGCTTT----- mirL 22 13

```



```

-----GTTCTTCAGTGGCAAGCTTT----- mirL 20 7
-----TCTTCAGTGGCAAGCTTT----- mirL 18 6
-----GTTCTTCAGTGGCAAGCTTTAT----- mirL 22 5
-----TTCTTCAGTGGCAAGCTTT----- mirL 19 3
-----TCTTCAGTGGCAAGCTTTA----- mirL 19 3
-----TAGTTCTTCAGTGGCAAGCTTTA----- mirL 23 2
-----TAGTTCTTCAGTGGCAAGCTT----- mirL 21 2
-----TTCTTCAGTGGCAAGCTT----- mirL 18 1
-----AGTAGTTCTTCAGTGGCAAGCTTTA----- mirL 25 1
-----TAGTTCTTCAGTGGCAAGCT----- mirL 20 1
-----TAGTTCTTCAGTGGCAAG----- mirL 18 1
-----GTAGTTCTTCAGTGGCAAGCTTT----- mirL 23 1
-----TTCTTCAGTGGCAAGCTTTA----- mirL 20 1
-----TGTCCTGACCCAGCTAAA----- loop 18 1
-----AAGCTGCCAGTTGAAGAAGTGT--- mirR 22 11417
-----AAGCTGCCAGTTGAAGAAG----- mirR 19 5841
-----AAGCTGCCAGTTGAAGAAGTGT--- mirR 23 2815
-----AAGCTGCCAGTTGAAGAAGTGTG--- mirR 24 2041
-----AAGCTGCCAGTTGAAGAAGT----- mirR 20 1459
-----AAGCTGCCAGTTGAAGAAGT----- mirR 21 1090
-----AAGCTGCCAGTTGAAGAA----- mirR 18 300
-----AGCTGCCAGTTGAAGAAGTGT--- mirR 21 9
-----GCTGCCAGTTGAAGAAGTGT--- mirR 20 8
-----AAAGCTGCCAGTTGAAGAAGTGT--- mirR 23 7
-----AGCTGCCAGTTGAAGAAGTGT--- mirR 22 5
-----AGCTGCCAGTTGAAGAAGTGTG--- mirR 23 5
-----AAAGCTGCCAGTTGAAGAAG----- mirR 20 4
-----GCTGCCAGTTGAAGAAGTGTG--- mirR 22 4
-----AGCTGCCAGTTGAAGAAGT----- mirR 19 3
-----AAAGCTGCCAGTTGAAGAAGT----- mirR 21 2
-----CTAAAGCTGCCAGTTGAA----- mirR 18 2
-----GCTGCCAGTTGAAGAAGTGT--- mirR 19 2
-----AGCTGCCAGTTGAAGAAGTGTG--- mirR 24 2
-----AGCTGCCAGTTGAAGAAG----- mirR 18 2
-----AAAGCTGCCAGTTGAAGAAGT----- mirR 22 1
-----GCTGCCAGTTGAAGAAGTGTG--- mirR 23 1
-----GCTGCCAGTTGAAGAAGTGT--- mirR 21 1
-----CTAAAGCTGCCAGTTGAAG----- mirR 19 1
-----CTGCCAGTTGAAGAAGTGT--- mirR 19 1

```

```

>mmu-mir-323
AGGTGGTCCGTGGCGGTTTCGCTTCATTTATGGCGCACATTACAGGTCGACCTCTTTGC species len reads
AGGTGGTCCGTGGCGGTTTCGC----- mirL 22 517
AGGTGGTCCGTGGCGGTTTCG----- mirL 21 485
AGGTGGTCCGTGGCGGTTTC----- mirL 20 202
AGGTGGTCCGTGGCGGTT----- mirL 19 77

```

```

AGGTGGTCCGTGGCGCGTTCGCT----- mirL 23 18
---TGGTCCGTGGCGCGTTCG----- mirL 18 1
-----GCACATTACACGGTCGACCTCT---- mirR 22 22602
-----CACATTACACGGTCGACCTCT---- mirR 21 15560
-----GCACATTACACGGTCGACCTC---- mirR 21 3470
-----GCACATTACACGGTCGACCTCTT-- mirR 23 2328
-----GCACATTACACGGTCGACC----- mirR 19 1603
-----CACATTACACGGTCGACCTC---- mirR 20 1482
-----CACATTACACGGTCGACCTCTT-- mirR 22 1481
-----GCACATTACACGGTCGAC----- mirR 18 1388
-----GCACATTACACGGTCGACCT---- mirR 20 1286
-----CACATTACACGGTCGACCT---- mirR 19 969
-----CACATTACACGGTCGACC----- mirR 18 419
-----CACATTACACGGTCGACCTCTTT-- mirR 23 185
-----GCACATTACACGGTCGACCTCTTT-- mirR 24 95
-----ACATTACACGGTCGACCTCT---- mirR 20 48
-----CGCACATTACACGGTCGACCTC---- mirR 22 41
-----CGCACATTACACGGTCGACCTCT--- mirR 23 18
-----CATTACACGGTCGACCTCT---- mirR 19 16
-----CACATTACACGGTCGACCTCTTTCG mirR 25 16
-----CGCACATTACACGGTCGACCT---- mirR 21 15
-----CGCACATTACACGGTCGAC----- mirR 19 10
-----CGCACATTACACGGTCGACC----- mirR 20 8
-----ACATTACACGGTCGACCTCTT--- mirR 21 7
-----CGCACATTACACGGTCGACCTCTT--- mirR 24 4
-----ACATTACACGGTCGACCTC---- mirR 19 3
-----CGCACATTACACGGTCGA----- mirR 18 3
-----ACATTACACGGTCGACCT---- mirR 18 3
-----CATTACACGGTCGACCTCTT--- mirR 20 2
-----GCGCACATTACACGGTCGAC----- mirR 20 2
-----GCGCACATTACACGGTCGACCTC---- mirR 23 2
-----ACATTACACGGTCGACCTCTTT-- mirR 22 2
-----GGCGCACATTACACGGTCGACCTC---- mirR 24 1
-----GCGCACATTACACGGTCGACC----- mirR 21 1
-----GCGCACATTACACGGTCGACCTCT---- mirR 24 1

```

>mmu-mir-181c

```

GAACTTGCCAAGGGTTTGGGGGAACATTCAACCTGTTCGGTGAGTTTGGGCAGCTCAGACAAACCATCGACCGTTGAGTGGACCCCGAGGCTGGAACTGCCACCCGTC species len reads
-----GCCAAGGGTTTGGGGGAAC----- morL 19 2
GAACTTGCCAAGGGTTTGG----- morL 19 1
-----GCCAAGGGTTTGGGGGAA----- morL 18 1
-----AACATTCAACCTGTTCGGTGA----- mirL 20 12114
-----AACATTCAACCTGTTCGGTGAGTTT----- mirL 24 10538
-----AACATTCAACCTGTTCGGTGAGTTT----- mirL 25 9972
-----AACATTCAACCTGTTCGGTGAGTT----- mirL 23 7496
-----AACATTCAACCTGTTCGGTGAGT----- mirL 22 6339

```

```
-----ACATTCAACCTGTCGGTGAGTTT----- mirL 23 81
-----ACATTCAACCTGTCGGTGAGTT----- mirL 22 28
-----ACATTCAACCTGTCGGTGAGTTTG----- mirL 24 27
-----ACATTCAACCTGTCGGTGAG----- mirL 20 20
-----ACATTCAACCTGTCGGTGAGT----- mirL 21 14
-----CATTCAACCTGTCGGTGAGTTT----- mirL 22 12
-----GAACATTCAACCTGTCGGTGAGT----- mirL 23 11
-----ATTCAACCTGTCGGTGAGTTT----- mirL 21 7
-----GAACATTCAACCTGTCGGT----- mirL 19 7
-----GAACATTCAACCTGTCGGTGAGTTT----- mirL 25 3
-----CATTCAACCTGTCGGTGAGTT----- mirL 21 3
-----CATTCAACCTGTCGGTGAGTTTG----- mirL 23 3
-----GAACATTCAACCTGTCGGTG----- mirL 20 3
-----CATTCAACCTGTCGGTGA----- mirL 18 2
-----CATTCAACCTGTCGGTGAG----- mirL 19 2
-----ATTCAACCTGTCGGTGAG----- mirL 18 2
-----GAACATTCAACCTGTCGGTGAGTT----- mirL 24 2
-----ATTCAACCTGTCGGTGAGTTTG----- mirL 22 1
-----ATTCAACCTGTCGGTGAGTT----- mirL 20 1
-----ACCATCGACCGTTGAGTGGACC----- mirR 22 1472
-----ACCATCGACCGTTGAGTGGACCC----- mirR 23 1050
-----ACCATCGACCGTTGAGTGGAC----- mirR 21 741
-----ACCATCGACCGTTGAGTGG----- mirR 19 569
-----ACCATCGACCGTTGAGTGGGA----- mirR 20 340
-----AACCATCGACCGTTGAGTGGAC----- mirR 22 83
-----ACCATCGACCGTTGAGTGGACCC----- mirR 24 78
-----AACCATCGACCGTTGAGTGG----- mirR 20 66
-----AACCATCGACCGTTGAGTGGGA----- mirR 21 53
-----ACCATCGACCGTTGAGTG----- mirR 18 51
-----AACCATCGACCGTTGAGTGGACC----- mirR 23 38
-----AACCATCGACCGTTGAGTGGACCC----- mirR 24 7
-----AACCATCGACCGTTGAGTG----- mirR 19 7
-----AACCATCGACCGTTGAGTGGACCC----- mirR 25 5
-----AAACCATCGACCGTTGAGTGGAC----- mirR 23 3
-----CCATCGACCGTTGAGTGGACC----- mirR 21 2
-----AAACCATCGACCGTTGAGTGG----- mirR 21 2
-----CATCGACCGTTGAGTGGGA----- mirR 18 2
-----CCATCGACCGTTGAGTGGGA----- mirR 19 1
-----CATCGACCGTTGAGTGGAC----- mirR 19 1
-----CCATCGACCGTTGAGTGGAC----- mirR 20 1
-----CCCGAGGCCTGGAAGTGC----- morR 18 3
-----GAGGCCTGGAAGTGCCACC----- morR 19 2
-----CCCGAGGCCTGGAAGTGCCACC----- morR 23 1
-----GAGGCCTGGAAGTGCCACCC----- morR 20 1
-----CCCGAGGCCTGGAAGTGCCACC----- morR 22 1
-----CCGAGGCCTGGAAGTGCCACCCGTC morR 25 1
```

-----CGAGGCCTGGAAGTCCACC----- morR 20 1  
-----CCGAGGCCTGGAAGTCC----- morR 18 1

>mmu-mir-181b-2

| Species | len | reads |
|---------|-----|-------|
| morL    | 18  | 1     |
| mirL    | 25  | 14526 |
| mirL    | 23  | 12022 |
| mirL    | 21  | 8669  |
| mirL    | 22  | 7932  |
| mirL    | 24  | 7219  |
| mirL    | 23  | 126   |
| mirL    | 24  | 107   |
| mirL    | 25  | 106   |
| mirL    | 22  | 105   |
| mirL    | 20  | 58    |
| mirL    | 24  | 12    |
| mirL    | 21  | 9     |
| mirL    | 23  | 8     |
| mirL    | 19  | 7     |
| mirL    | 20  | 7     |
| mirL    | 22  | 6     |
| mirL    | 23  | 4     |
| mirL    | 20  | 3     |
| mirL    | 23  | 3     |
| mirL    | 22  | 2     |
| mirL    | 21  | 2     |
| mirL    | 24  | 1     |
| mirL    | 22  | 1     |
| mirL    | 19  | 1     |
| mirL    | 25  | 1     |
| mirL    | 20  | 1     |
| mirL    | 21  | 1     |
| mirL    | 18  | 1     |
| mirR    | 21  | 12    |
| mirR    | 19  | 6     |
| mirR    | 20  | 5     |
| mirR    | 20  | 4     |
| mirR    | 22  | 4     |
| mirR    | 18  | 1     |
| mirR    | 23  | 1     |
| mirR    | 21  | 1     |
| mirR    | 22  | 1     |
| mirR    | 24  | 1     |

>mmu-mir-99b

| Sequence                 | Species | len   | reads |
|--------------------------|---------|-------|-------|
| CCCACCCGTAGAACCGACCTTGC  | mirL 21 | 27526 |       |
| --CACCCGTAGAACCGACCTTGC  | mirL 22 | 7435  |       |
| --CACCCGTAGAACCGACCTTGC  | mirL 20 | 4303  |       |
| --CACCCGTAGAACCGACCTTGC  | mirL 19 | 2848  |       |
| --CACCCGTAGAACCGACCTTGC  | mirL 23 | 2199  |       |
| ---ACCCGTAGAACCGACCTTGC  | mirL 20 | 264   |       |
| ---ACCCGTAGAACCGACCTTGC  | mirL 21 | 106   |       |
| ---ACCCGTAGAACCGACCTTGC  | mirL 22 | 56    |       |
| ---ACCCGTAGAACCGACCTTGC  | mirL 19 | 49    |       |
| --CCACCCGTAGAACCGACCTTGC | mirL 22 | 16    |       |
| ---CCCCTAGAACCGACCTTGC   | mirL 19 | 15    |       |
| ---ACCCGTAGAACCGACCTTGC  | mirL 18 | 9     |       |
| ---CCGTAGAACCGACCTTGC    | mirL 18 | 6     |       |
| ---CCCCTAGAACCGACCTTGC   | mirL 20 | 5     |       |
| --CCACCCGTAGAACCGACCTTGC | mirL 21 | 3     |       |
| --CCACCCGTAGAACCGACCTTGC | mirL 23 | 3     |       |
| ---CCCCTAGAACCGACCTTGC   | mirL 18 | 2     |       |
| --CCACCCGTAGAACCGACCTTGC | mirL 18 | 1     |       |
| CCCACCCGTAGAACCGACCTTGC  | mirL 23 | 1     |       |
| --CCACCCGTAGAACCGACCTTGC | mirL 20 | 1     |       |
| ---CCGTAGAACCGACCTTGC    | mirL 19 | 1     |       |
| ---CCGTAGAACCGACCTTGC    | mirL 20 | 1     |       |
| -----TGC                 | loop    | 19    | 1     |
| -----TGC                 | mirR 23 | 1482  |       |
| -----TGC                 | mirR 20 | 1342  |       |
| -----TGC                 | mirR 21 | 884   |       |
| -----TGC                 | mirR 22 | 511   |       |
| -----TGC                 | mirR 24 | 340   |       |
| -----TGC                 | mirR 19 | 299   |       |
| -----TGC                 | mirR 25 | 186   |       |
| -----TGC                 | mirR 22 | 24    |       |
| -----TGC                 | mirR 19 | 7     |       |
| -----TGC                 | mirR 21 | 5     |       |
| -----TGC                 | mirR 20 | 3     |       |
| -----TGC                 | mirR 18 | 2     |       |
| -----TGC                 | mirR 23 | 2     |       |
| -----TGC                 | mirR 20 | 1     |       |
| -----TGC                 | mirR 24 | 1     |       |
| -----TGC                 | mirR 21 | 1     |       |
| -----TGC                 | mirR 18 | 1     |       |
| -----TGC                 | mirR 18 | 1     |       |
| -----TGC                 | morR 22 | 1     |       |

>mmu-mir-193b

| Sequence                                                                                               | Species | len | reads |
|--------------------------------------------------------------------------------------------------------|---------|-----|-------|
| GGAGGCGGTGGGCCAGAAATCGGGGTTTTGAGGGCGAGATGAGTTTGTGTTTTATCCAAGTGGCCCAAAAGTCCCGCTTTTGGGGTCATCTAACAGCAAAGG |         |     |       |

```
GGAGGCGGTGGGCCAGAAATC----- morL 18 1
GGAGGCGGTGGGCCAGAAATC----- morL 21 1
-----CGGGGTTTTGAGGGCGAGATGA----- mirL 22 100
-----CGGGGTTTTGAGGGCGAGATG----- mirL 21 24
-----CGGGGTTTTGAGGGCGAGATGAG----- mirL 23 16
-----CGGGGTTTTGAGGGCGAGAT----- mirL 20 9
-----CGGGGTTTTGAGGGCGAGA----- mirL 19 6
-----TCGGGGTTTTGAGGGCGAGATG----- mirL 22 2
-----TCGGGGTTTTGAGGGCGAGA----- mirL 20 2
-----TCGGGGTTTTGAGGGCGAGAT----- mirL 21 1
-----GGGGTTTTGAGGGCGAGATGAG----- mirL 22 1
-----TCGGGGTTTTGAGGGCGAGATGA----- mirL 23 1
-----AACTGGCCACAAAAGTCCCGCT----- mirR 22 19972
-----AACTGGCCACAAAAGTCCCGC----- mirR 21 8040
-----AACTGGCCACAAAAGTCCC----- mirR 19 6540
-----AACTGGCCACAAAAGTCC----- mirR 18 5839
-----AACTGGCCACAAAAGTCCCGCTT----- mirR 23 4549
-----AACTGGCCACAAAAGTCCCG----- mirR 20 1745
-----AACTGGCCACAAAAGTCCCGCTTT----- mirR 24 1097
-----ACTGGCCACAAAAGTCCC----- mirR 18 511
-----ACTGGCCACAAAAGTCCCGCTT----- mirR 22 416
-----ACTGGCCACAAAAGTCCCGCTTT----- mirR 23 244
-----ACTGGCCACAAAAGTCCCGC----- mirR 20 171
-----ACTGGCCACAAAAGTCCCGCT----- mirR 21 159
-----ACTGGCCACAAAAGTCCCG----- mirR 19 81
-----ACTGGCCACAAAAGTCCCGCTTTT----- mirR 24 13
-----CAACTGGCCACAAAAGTCCCGC----- mirR 22 7
-----CAACTGGCCACAAAAGTCC----- mirR 19 5
-----CAACTGGCCACAAAAGTCCC----- mirR 20 4
-----TGGCCACAAAAGTCCCGCT----- mirR 19 3
-----TGGCCACAAAAGTCCCGC----- mirR 18 2
-----CAACTGGCCACAAAAGTCCCGCTT----- mirR 24 2
-----CAACTGGCCACAAAAGTCCCGCT----- mirR 23 2
-----CAACTGGCCACAAAAGTCCCGCTTTT----- mirR 26 1
-----CCAACTGGCCACAAAAGTCCCGCT----- mirR 24 1
-----TGGCCACAAAAGTCCCGCTTT----- mirR 21 1
-----CTGGCCACAAAAGTCCCG----- mirR 18 1
-----CAACTGGCCACAAAAGTCCCG----- mirR 21 1
-----TGGCCACAAAAGTCCCGCTTTT----- mirR 22 1
-----TGGCCACAAAAGTCCCGCT----- mirR 20 1
-----TTTGGGGTCATCCTAACAGCAAAGG morR 25 2
-----TTTTGGGGTCATCCTAAC----- morR 18 1
-----TGGGGTCATCCTAACAGCAA--- morR 20 1
```

>mmu-mir-187

AATGCGGGTCCTCAGGCTACAACACAGGACCCGGGCGCTGCTCTGACCCTCGTGTCTTGTGTTGCAGCCGGAGG species len reads

```

AATGCGGGTCCTCAGGCT-----morL 18 1
-----GCTACAACACAGGACCCGGGC-----mirL 21 157
-----GCTACAACACAGGACCCGGGCGC-----mirL 23 153
-----AGGCTACAACACAGGACCCGGGC-----mirL 23 137
-----GCTACAACACAGGACCCGGG-----mirL 20 132
-----GCTACAACACAGGACCCGGGCG-----mirL 22 124
-----GCTACAACACAGGACCCGG-----mirL 19 121
-----AGGCTACAACACAGGACC-----mirL 18 94
-----AGGCTACAACACAGGACCCGG-----mirL 21 80
-----AGGCTACAACACAGGACCC-----mirL 19 75
-----AGGCTACAACACAGGACCCGGG-----mirL 22 58
-----GGCTACAACACAGGACCCGGG-----mirL 21 24
-----GGCTACAACACAGGACCCGG-----mirL 20 21
-----GGCTACAACACAGGACCCGGGC-----mirL 22 21
-----GGCTACAACACAGGACCCG-----mirL 19 12
-----GGCTACAACACAGGACCC-----mirL 18 11
-----TACAACACAGGACCCGGGCGC-----mirL 21 7
-----TACAACACAGGACCCGGGCGCTG-----mirL 23 3
-----TACAACACAGGACCCGGG-----mirL 18 3
-----TACAACACAGGACCCGGGC-----mirL 19 3
-----TACAACACAGGACCCGGGCGCT-----mirL 22 2
-----CTACAACACAGGACCCGGGCGC-----mirL 22 1
-----TCGTGTCTTGTGTTGCAGCCGG---mirR 22 12029
-----TCGTGTCTTGTGTTGCAGC-----mirR 19 11229
-----TCGTGTCTTGTGTTGCAGCC-----mirR 20 8767
-----TCGTGTCTTGTGTTGCAGCCGGA--mirR 23 5290
-----TCGTGTCTTGTGTTGCAGCCGGAG--mirR 24 2744
-----TCGTGTCTTGTGTTGCAGCCG---mirR 21 2253
-----TCGTGTCTTGTGTTGCAG-----mirR 18 927
-----CGTGTCTTGTGTTGCAGCCGGA--mirR 22 773
-----CGTGTCTTGTGTTGCAGCC-----mirR 19 688
-----CGTGTCTTGTGTTGCAGC-----mirR 18 638
-----CTCGTGTCTTGTGTTGCAGC-----mirR 20 518
-----CGTGTCTTGTGTTGCAGCCGG---mirR 21 485
-----CTCGTGTCTTGTGTTGCAGCC-----mirR 21 325
-----CGTGTCTTGTGTTGCAGCCGGAG--mirR 23 308
-----CTCGTGTCTTGTGTTGCAGCCGG---mirR 23 275
-----CTCGTGTCTTGTGTTGCAGCCG---mirR 22 221
-----CGTGTCTTGTGTTGCAGCCGGAGG--mirR 24 179
-----CGTGTCTTGTGTTGCAGCCG---mirR 20 162
-----CTCGTGTCTTGTGTTGCAGCCGGA--mirR 24 84
-----CTCGTGTCTTGTGTTGCAG-----mirR 19 63
-----CTCGTGTCTTGTGTTGCAGCCGGAG--mirR 25 56
-----CCTCGTGTCTTGTGTTGCAGCC-----mirR 22 7
-----CCTCGTGTCTTGTGTTGCAGCCG---mirR 23 4
-----GTGTCTTGTGTTGCAGCCGG---mirR 20 4

```

```

-----TGTCTTGTGTTGCAGCCGGAGG mirR 22 3
-----GTGTCTTGTGTTGCAGCC----- mirR 18 3
-----TGTCTTGTGTTGCAGCCGGA-- mirR 20 3
-----GTGTCTTGTGTTGCAGCCGAG- mirR 22 3
-----CCTCGTGTCTTGTGTTGC----- mirR 18 3
-----GTGTCTTGTGTTGCAGCCGGA-- mirR 21 2
-----CCTCGTGTCTTGTGTTGCAGCCGG-- mirR 24 2
-----CCTCGTGTCTTGTGTTGCAG----- mirR 20 2
-----GTGTCTTGTGTTGCAGCCGGAGG mirR 23 2
-----TGTCTTGTGTTGCAGCCGGAG- mirR 21 2
-----CCTCGTGTCTTGTGTTGCA----- mirR 19 1
-----CCTCGTGTCTTGTGTTGCAGC----- mirR 21 1
-----CCCTCGTGTCTTGTGTTGCAGC----- mirR 22 1
-----TGTCTTGTGTTGCAGCCGG--- mirR 19 1

>mmu-mir-451
GAAACCGTTACCATTACTGAGTTTAGTAATGGTAACGGTTCTCTTGCTGCTCCCACAAACTGTGCCAAGAAGAGCTCATGAC species len reads
-AAACCGTTACCATTACTGAGT----- mirL 21 16350
-AAACCGTTACCATTACTGA----- mirL 19 14303
-AAACCGTTACCATTACTGAG----- mirL 20 11383
-AAACCGTTACCATTACTG----- mirL 18 6108
--AACCGTTACCATTACTGA----- mirL 18 41
--AACCGTTACCATTACTGAG----- mirL 19 28
--AACCGTTACCATTACTGAGT----- mirL 20 27
---ACCGTTACCATTACTGAGT----- mirL 19 12
---ACCGTTACCATTACTGAG----- mirL 18 7
GAAACCGTTACCATTACTGAGT----- mirL 22 3
GAAACCGTTACCATTACTGAG----- mirL 21 2
GAAACCGTTACCATTACTG----- mirL 19 1
GAAACCGTTACCATTACTGA----- mirL 20 1
-----TTTAGTAATGGTAACGGTTCT----- loop 21 2
-----CTCTTGCTGCTCCCACAAAC----- mirR 20 259
-----TCTTGCTGCTCCCACAAAC----- mirR 19 89
-----CTCTTGCTGCTCCCACAAA----- mirR 19 11
-----TCTTGCTGCTCCCACAAA----- mirR 18 8
-----CTCTTGCTGCTCCCACAAACTG----- mirR 22 6
-----CTCTTGCTGCTCCCACAAACT----- mirR 21 5
-----CTCTTGCTGCTCCCACAAA----- mirR 18 3
-----TCTTGCTGCTCCCACAAACT----- mirR 20 2
-----CTCTTGCTGCTCCCACAAACTGT----- mirR 23 1
-----TCTTGCTGCTCCCACAAACTG----- mirR 21 1
-----TTCTCTTGCTGCTCCCACA----- mirR 19 1
-----CTTGCTGCTCCCACAAAC----- mirR 18 1
-----GCCAAGAAGAGCTCATGAC morR 19 1

```

>mmu-mir-181b-1



|                                                                                   | species | len | reads |
|-----------------------------------------------------------------------------------|---------|-----|-------|
| ATCAACATTCATTGCTGTCGGTGGGTTGAACTGTGTAGAAAAGCTCACTGAACAATGAATGCAACTGTGGCCCCGCTTTTT | mirL    | 23  | 12022 |
| ---AACATTCATTGCTGTCGGTGGGT---                                                     | mirL    | 25  | 11981 |
| ---AACATTCATTGCTGTCGGTGGGTTG---                                                   | mirL    | 21  | 8669  |
| ---AACATTCATTGCTGTCGGTGGG---                                                      | mirL    | 22  | 7932  |
| ---AACATTCATTGCTGTCGGTGGGT---                                                     | mirL    | 24  | 7219  |
| ---ACATTCATTGCTGTCGGTGGGTT---                                                     | mirL    | 23  | 126   |
| ---ACATTCATTGCTGTCGGTGGGT---                                                      | mirL    | 22  | 105   |
| ---ACATTCATTGCTGTCGGTGG---                                                        | mirL    | 21  | 57    |
| ---ACATTCATTGCTGTCGGTGGGTTG---                                                    | mirL    | 24  | 57    |
| --CAACATTCATTGCTGTCGGTGGGT---                                                     | mirL    | 24  | 12    |
| --CAACATTCATTGCTGTCGGTGG---                                                       | mirL    | 21  | 9     |
| --CAACATTCATTGCTGTCGGTGGG---                                                      | mirL    | 23  | 8     |
| --CAACATTCATTGCTGTCGGT---                                                         | mirL    | 20  | 7     |
| --CAACATTCATTGCTGTCGG---                                                          | mirL    | 19  | 7     |
| ----CATTCATTGCTGTCGGTGGG---                                                       | mirL    | 20  | 3     |
| ----CATTCATTGCTGTCGGTGGGTTG---                                                    | mirL    | 23  | 3     |
| ----CATTCATTGCTGTCGGTGGGTT---                                                     | mirL    | 22  | 2     |
| ----ATTCATTGCTGTCGGTGGGTTG---                                                     | mirL    | 22  | 2     |
| ----ATTCATTGCTGTCGGTGGGTTGA---                                                    | mirL    | 23  | 2     |
| ----ATTCATTGCTGTCGGTGGGTT---                                                      | mirL    | 21  | 2     |
| ----CATTCATTGCTGTCGGTGGGTTGAA---                                                  | mirL    | 25  | 2     |
| ATCAACATTCATTGCTGTCGGTGG---                                                       | mirL    | 24  | 1     |
| -TCAACATTCATTGCTGTC---                                                            | mirL    | 18  | 1     |
| ----CATTCATTGCTGTCGGTGG---                                                        | mirL    | 19  | 1     |
| -TCAACATTCATTGCTGTCGGTGGGT---                                                     | mirL    | 25  | 1     |
| -TCAACATTCATTGCTGTCGGTG---                                                        | mirL    | 22  | 1     |
| ----ATTCATTGCTGTCGGTGGGT---                                                       | mirL    | 20  | 1     |
| -----GTTGAACTGTGTAGAAAAG-----                                                     | loop    | 19  | 1     |
| -----CTCACTGAACAATGAATGCAA-----                                                   | mirR    | 21  | 89    |
| -----CTCACTGAACAATGAATGC-----                                                     | mirR    | 19  | 75    |
| -----CTCACTGAACAATGAATGCA-----                                                    | mirR    | 20  | 54    |
| -----CTCACTGAACAATGAATGCAAC-----                                                  | mirR    | 22  | 14    |
| -----CTCACTGAACAATGAATG-----                                                      | mirR    | 18  | 8     |
| -----AAGCTCACTGAACAATGAATGC-----                                                  | mirR    | 22  | 5     |
| -----AGCTCACTGAACAATGAATGC-----                                                   | mirR    | 21  | 3     |
| -----CTCACTGAACAATGAATGCAACT-----                                                 | mirR    | 23  | 3     |
| -----AGCTCACTGAACAATGAATGCA-----                                                  | mirR    | 22  | 3     |
| -----AGCTCACTGAACAATGAATGCAA-----                                                 | mirR    | 23  | 2     |
| -----AGCTCACTGAACAATGAATGCAAC-----                                                | mirR    | 24  | 2     |
| -----AAGCTCACTGAACAATGAATGCAAC-----                                               | mirR    | 25  | 1     |
| -----TCACTGAACAATGAATGCAA-----                                                    | mirR    | 20  | 1     |
| -----AAGCTCACTGAACAATGAATGCA-----                                                 | mirR    | 23  | 1     |
| -----AGCTCACTGAACAATGAATGCAACT-----                                               | mirR    | 25  | 1     |
| -----AGCTCACTGAACAATGAA-----                                                      | mirR    | 18  | 1     |

```

-----ACTGAACAATGAATGCAA----- mirR 18 1
-----GCTCACTGAACAATGAATGC----- mirR 20 1
-----ACTGTGGCCCCGCTTTTT morR 18 1

```

>mmu-mir-140

```

TGTGTCTCTCTCTGTGTCCTGCCAGTGGTTTTACCCTATGGTAGGTTACGTCATGCTGTTCTACCACAGGGTAGAACCACGGACAGG species len reads
---GTCTCTCTCTGTGTCCTGC----- morL 19 4
--TGTCTCTCTCTGTGTCCTGC----- morL 20 1
TGTGTCTCTCTCTGTGTCCTG----- morL 21 1
-----CAGTGGTTTTACCCTATGGTAG----- mirL 22 2051
-----CAGTGGTTTTACCCTATGGT----- mirL 20 1379
-----CAGTGGTTTTACCCTATGGTA----- mirL 21 594
-----CAGTGGTTTTACCCTATGGTAGG----- mirL 23 440
-----CAGTGGTTTTACCCTATGG----- mirL 19 271
-----CCAGTGGTTTTACCCTATGGTA----- mirL 22 30
-----CCAGTGGTTTTACCCTATGGT----- mirL 21 26
-----CCAGTGGTTTTACCCTATGGTAG----- mirL 23 17
-----CCAGTGGTTTTACCCTATGG----- mirL 20 14
-----AGTGGTTTTACCCTATGGTAGG----- mirL 22 13
-----CCAGTGGTTTTACCCTATG----- mirL 19 5
-----AGTGGTTTTACCCTATGGTAG----- mirL 21 5
-----AGTGGTTTTACCCTATGGT----- mirL 19 3
-----AGTGGTTTTACCCTATGGTAGGT----- mirL 23 1
-----AGTGGTTTTACCCTATGGTA----- mirL 20 1
-----GTGGTTTTACCCTATGGTA----- mirL 19 1
-----ACCACAGGGTAGAACCACGGAC--- mirR 22 20335
-----TACCACAGGGTAGAACCACGGAC--- mirR 23 4985
-----ACCACAGGGTAGAACCACGGACA-- mirR 23 4339
-----ACCACAGGGTAGAACCACGGA--- mirR 21 3102
-----ACCACAGGGTAGAACCACGG----- mirR 20 2326
-----TACCACAGGGTAGAACCACGG----- mirR 21 1667
-----ACCACAGGGTAGAACCAC----- mirR 18 1229
-----TACCACAGGGTAGAACCACGGA--- mirR 22 1196
-----TACCACAGGGTAGAACCACGGACA-- mirR 24 879
-----TACCACAGGGTAGAACCAC----- mirR 19 793
-----ACCACAGGGTAGAACCACG----- mirR 19 587
-----CCACAGGGTAGAACCACGGACA-- mirR 22 585
-----ACCACAGGGTAGAACCACGGACAG- mirR 24 540
-----TACCACAGGGTAGAACCACG----- mirR 20 470
-----TACCACAGGGTAGAACCA----- mirR 18 284
-----CCACAGGGTAGAACCACGGAC--- mirR 21 162
-----CCACAGGGTAGAACCACGGA--- mirR 20 53
-----CCACAGGGTAGAACCACGGACAG- mirR 23 46
-----CCACAGGGTAGAACCACGG----- mirR 19 30
-----CCACAGGGTAGAACCACG----- mirR 18 15
-----CACAGGGTAGAACCACGGACA-- mirR 21 14

```

```

-----CTACCACAGGGTAGAACCACGGAC--- mirR 24 4
-----CCACAGGGTAGAACCACGGACAGG mirR 24 4
-----ACAGGGTAGAACCACGGAC--- mirR 19 4
-----CTACCACAGGGTAGAACC----- mirR 18 3
-----CAGAGGGTAGAACCACGGAC--- mirR 20 2
-----TCTACCACAGGGTAGAACCACGGAC--- mirR 25 2
-----ACAGGGTAGAACCACGGACA-- mirR 20 2
-----TCTACCACAGGGTAGAACC----- mirR 19 2
-----ACAGGGTAGAACCACGGACAG- mirR 21 1
-----CTACCACAGGGTAGAACCACGGACA-- mirR 25 1
-----CTACCACAGGGTAGAACCACGG----- mirR 22 1
-----ACAGGGTAGAACCACGG----- mirR 18 1
-----TCTACCACAGGGTAGAACCA----- mirR 20 1
-----CACAGGGTAGAACCACGG----- mirR 19 1

```

>mmu-mir-411

| Species | len | reads |
|---------|-----|-------|
| morL    | 21  | 2     |
| morL    | 22  | 1     |
| mirL    | 21  | 7582  |
| mirL    | 23  | 4908  |
| mirL    | 22  | 4439  |
| mirL    | 22  | 4437  |
| mirL    | 20  | 4106  |
| mirL    | 21  | 3451  |
| mirL    | 19  | 1138  |
| mirL    | 20  | 689   |
| mirL    | 19  | 666   |
| mirL    | 21  | 624   |
| mirL    | 19  | 430   |
| mirL    | 18  | 415   |
| mirL    | 20  | 372   |
| mirL    | 22  | 218   |
| mirL    | 18  | 83    |
| mirL    | 22  | 13    |
| mirL    | 20  | 9     |
| mirL    | 24  | 4     |
| mirL    | 20  | 3     |
| mirL    | 20  | 2     |
| mirL    | 22  | 2     |
| mirL    | 19  | 2     |
| mirL    | 18  | 2     |
| mirL    | 21  | 1     |
| mirL    | 23  | 1     |
| mirL    | 18  | 1     |
| mirL    | 19  | 1     |



```

-----GTCGATCGGTCGGTCGGTCAGT----- mirR 22 385
-----CGATCGGTCGGTCGGTCAG----- mirR 19 218
-----GTCGATCGGTCGGTCGGTCA----- mirR 20 192
-----GTCGATCGGTCGGTCGGTCAG----- mirR 21 168
-----CGATCGGTCGGTCGGTCA----- mirR 18 157
-----CGATCGGTCGGTCGGTCAGTC----- mirR 21 155
-----CGGTCGATCGGTCGGTCGGTCA----- mirR 22 124
-----TCGATCGGTCGGTCGGTCAGTCGGC----- mirR 25 103
-----CGGTCGATCGGTCGGTCGGTC----- mirR 21 90
-----CGATCGGTCGGTCGGTCAGTCG----- mirR 22 82
-----GTCGATCGGTCGGTCGGTC----- mirR 19 78
-----CGGTCGATCGGTCGGTCGGTC----- mirR 20 48
-----GTCGATCGGTCGGTCGGTC----- mirR 18 21
-----GTCGATCGGTCGGTCGGTCAGTCG----- mirR 24 18
-----CGGTCGATCGGTCGGTCGG----- mirR 19 13
-----CGGTCGATCGGTCGGTCG----- mirR 18 11
-----GATCGGTCGGTCGGTCAGTC----- mirR 19 6
-----CGATCGGTCGGTCGGTCAGTCGGC----- mirR 24 5
-----ATCGGTCGGTCGGTCAGTC----- mirR 18 4
-----CGATCGGTCGGTCGGTCAGTCGG----- mirR 23 3
-----GGTCGATCGGTCGGTCGGTCAGTC----- mirR 24 2
-----ATCGGTCGGTCGGTCAGTC----- mirR 19 2
-----CGGTCGATCGGTCGGTCGGTCAGTC----- mirR 24 1
-----GGTCGATCGGTCGGTCGGTCA----- mirR 21 1
-----GGTCGATCGGTCGGTCGGTC----- mirR 20 1
-----GATCGGTCGGTCGGTCAG----- mirR 18 1
-----CGGTCGATCGGTCGGTCGGTCAGTC----- mirR 25 1
-----CGGCTTCCTGTCTTCGAACTG morR 21 1

```

>mmu-mir-329

```

GAGAGGTTTTCTGGGTCTCTGTTTCTTTGATGAGAATGAAACACACCCAGCTAACCTTTTTTTC species len reads
-AGAGGTTTTCTGGGTCTCTGTTT----- mirL 24 2467
-AGAGGTTTTCTGGGTCTCTGTTT----- mirL 23 1189
-AGAGGTTTTCTGGGTCTCTGT----- mirL 21 1164
-AGAGGTTTTCTGGGTCTC----- mirL 18 467
-AGAGGTTTTCTGGGTCTCTGTT----- mirL 22 408
--GAGTTTTCTGGGTCTCTGTTT----- mirL 23 114
--GAGTTTTCTGGGTCTCTGTTT----- mirL 22 52
--GAGTTTTCTGGGTCTCTGT----- mirL 20 7
--GAGTTTTCTGGGTCTCTGTTTCT----- mirL 24 5
--GAGTTTTCTGGGTCTCT----- mirL 18 4
---AGTTTTCTGGGTCTCTGTTT----- mirL 21 3
---AGTTTTCTGGGTCTCTGTTT----- mirL 22 2
---GTTTTCTGGGTCTCTGTTT----- mirL 20 1
---GTTTTCTGGGTCTCTGTTTCTTTG----- mirL 25 1
GAGAGGTTTTCTGGGTCTCTGTTT----- mirL 25 1

```

```

---AGGTTTTCTGGGTCTCTGTTTCT----- mirL 23 1
---GGTTTTCTGGGTCTCTGTT----- mirL 19 1
-----AACACACCCAGCTAACCTTTT----- mirR 21 15981
-----AACACACCCAGCTAACCTTTT--- mirR 22 15579
-----AACACACCCAGCTAACCTTT----- mirR 20 3150
-----AACACACCCAGCTAACCTT----- mirR 19 1257
-----AACACACCCAGCTAACCTTTTTT--- mirR 23 701
-----AACACACCCAGCTAACCT----- mirR 18 602
-----ACACACCCAGCTAACCTTTTT--- mirR 21 296
-----ACACACCCAGCTAACCTTTT--- mirR 20 225
-----AACACACCCAGCTAACCTTTTTT--- mirR 24 179
-----ACACACCCAGCTAACCTTT----- mirR 19 64
-----ACACACCCAGCTAACCTTTTTT--- mirR 22 36
-----AAACACACCCAGCTAACCTTTT--- mirR 22 29
-----AAACACACCCAGCTAACCTTT----- mirR 21 14
-----ACACACCCAGCTAACCTT----- mirR 18 12
-----AAACACACCCAGCTAACCTTTTT--- mirR 23 12
-----ACACACCCAGCTAACCTTTT--- mirR 18 10
-----ACACACCCAGCTAACCTTTTTTTC mirR 24 8
-----ACACACCCAGCTAACCTTTTTT--- mirR 23 5
-----CACACCCAGCTAACCTTTT--- mirR 19 4
-----GAAACACACCCAGCTAACCTTT--- mirR 22 4
-----ACACCCAGCTAACCTTTTT--- mirR 19 4
-----CACACCCAGCTAACCTTTTT--- mirR 20 4
-----AAACACACCCAGCTAACCT----- mirR 19 3
-----AAACACACCCAGCTAACCC----- mirR 18 2
-----TGAAACACACCCAGCTAACCTTT--- mirR 23 2
-----AAACACACCCAGCTAACCTTTTTT--- mirR 25 1
-----TGAAACACACCCAGCTAACCC----- mirR 20 1
-----GAAACACACCCAGCTAACCTT----- mirR 21 1

```

>mmu-mir-598

```

ATGATGCTGCTGATGCTGGCGGTGATGCCGATGGTGCAGCTGAAAATGGGCTGCTACGTCATCGTCGTCATCGTTATCATCATCATCAGCACAGCCATCAGAT species len reads
ATGATGCTGCTGATGCTGGC----- morL 20 2
-----GCGGTGATGCCGATGGTGCGA----- mirL 21 14
-----GCGGTGATGCCGATGGTGCAGC----- mirL 23 5
-----GCGGTGATGCCGATGGTG----- mirL 18 3
-----GCGGTGATGCCGATGGTGC----- mirL 19 3
-----GCGGTGATGCCGATGGTGC----- mirL 20 3
-----TGGCGGTGATGCCGATGG----- mirL 18 1
-----TGGCGGTGATGCCGATGGTGC----- mirL 21 1
-----TACGTCATCGTCGTCATCGTTATC----- mirR 24 10988
-----TACGTCATCGTCGTCATCGTTA----- mirR 22 10017
-----TACGTCATCGTCGTCATCGTTAT----- mirR 23 8057
-----TACGTCATCGTCGTCATCGTT----- mirR 21 5867
-----TACGTCATCGTCGTCATCGT----- mirR 20 3723

```

```

-----TACGTCATCGTCGTCATC----- mirR 18 1759
-----TACGTCATCGTCGTCATCG----- mirR 19 1447
-----ACGTCATCGTCGTCATCGTTATC----- mirR 23 537
-----ACGTCATCGTCGTCATCGTTA----- mirR 21 316
-----ACGTCATCGTCGTCATCGTTAT----- mirR 22 266
-----ACGTCATCGTCGTCATCGTT----- mirR 20 145
-----ACGTCATCGTCGTCATCGT----- mirR 19 87
-----ACGTCATCGTCGTCATCG----- mirR 18 14
-----GTCATCGTCGTCATCGTTAT----- mirR 20 6
-----CTACGTCATCGTCGTCATCGTTAT----- mirR 24 4
-----CGTCATCGTCGTCATCGTTAT----- mirR 21 4
-----CTACGTCATCGTCGTCATCGT----- mirR 21 3
-----CTACGTCATCGTCGTCATC----- mirR 19 3
-----CTACGTCATCGTCGTCATCGTT----- mirR 22 2
-----ACGTCATCGTCGTCATCGTTATCA----- mirR 24 2
-----TGCTACGTCATCGTCGTCAT----- mirR 20 1
-----GTCATCGTCGTCATCGTT----- mirR 18 1
-----CTACGTCATCGTCGTCATCGTTATC----- mirR 25 1
-----CGTCATCGTCGTCATCGT----- mirR 18 1
-----CTACGTCATCGTCGTCATCGTTA----- mirR 23 1
-----CGTCATCGTCGTCATCGTTA----- mirR 20 1
-----CGTCATCGTCGTCATCGTT----- mirR 19 1
-----GCTACGTCATCGTCGTCAT----- mirR 19 1
-----CTACGTCATCGTCGTCAT----- mirR 18 1
-----ATCATCAGCACAGCCATC----- morR 18 2
-----TCATCATCAGCACAGCCATCA--- morR 21 1
-----TCATCATCAGCACAGCCATCAGAT morR 24 1
-----TCATCATCAGCACAGCCATC--- morR 20 1
-----ATCATCAGCACAGCCATCA--- morR 19 1

```

>mmu-mir-296

```

GAGGGCCCCCCTCAATCCTGTTGTGCTCGCTTCAGAGGGTTGGGTGGAGGCTCTCCTGAAGGTGTCCGCAGAGCGTCGC species len reads
-AGGGCCCCCCTCAATCCTGT----- mirL 21 37978
-AGGGCCCCCCTCAATCCTGTT----- mirL 22 3100
-AGGGCCCCCCTCAATCC----- mirL 18 788
-AGGGCCCCCCTCAATCCT----- mirL 19 425
-AGGGCCCCCCTCAATCCTG----- mirL 20 260
--GGGCCCCCCTCAATCCTGT----- mirL 20 27
---GGCCCCCCTCAATCCTGT----- mirL 19 8
GAGGGCCCCCCTCAATCCTGT----- mirL 22 8
--GGGCCCCCCTCAATCCTGTT----- mirL 21 2
---GGCCCCCCTCAATCCTGTT----- mirL 20 2
-----GAGGGTTGGGTGGAGGCTCTCC----- mirR 22 152
-----AGGGTTGGGTGGAGGCTCTCC----- mirR 21 76
-----GAGGGTTGGGTGGAGGCTCTC----- mirR 21 38
-----AGGGTTGGGTGGAGGCTCTC----- mirR 20 29

```

```

-----GAGGGTTGGGTGGAGGCTCT----- mirR 20 23
-----GAGGGTTGGGTGGAGGCTC----- mirR 19 21
-----AGGGTTGGGTGGAGGCTCTCCT----- mirR 22 17
-----GAGGGTTGGGTGGAGGCTCTCCT----- mirR 23 12
-----GAGGGTTGGGTGGAGGCTCTCCTG----- mirR 24 10
-----AGGGTTGGGTGGAGGCTC----- mirR 18 9
-----AGGGTTGGGTGGAGGCTCT----- mirR 19 7
-----GAGGGTTGGGTGGAGGCT----- mirR 18 4
-----AGGGTTGGGTGGAGGCTCTCCTG----- mirR 23 2
-----AGGGTTGGGTGGAGGCTCTCCTGA----- mirR 24 2
-----GGGTGGGTGGAGGCTCTCCTG----- mirR 22 1
-----AGAGGGTTGGGTGGAGGC----- mirR 18 1
-----GGGTGGGTGGAGGCTCTCC----- mirR 20 1
-----GAAGGTGTCCGCAGAGCGTCGC morR 22 1
-----TGAAGGTGTCCGCAGAGCGTCGC morR 23 1

```

>mmu-mir-183

| Sequence                                                                                               | Species | Len | Reads |
|--------------------------------------------------------------------------------------------------------|---------|-----|-------|
| GAGTGTGACTCCTGTCTGTATGGCACTGGTAGAATTCACCTGTGAACAGTCTCAGTCAGTGAATTACCGAAGGGCCATAAACAGAGCAGAGACAGATCCGCG | morL    | 18  | 2     |
| GAGTGTGACTCCTGTCTCT-----                                                                               | morL    | 18  | 1     |
| -----TGACTCCTGTCTGTGTA-----                                                                            | mirL    | 22  | 16774 |
| -----TATGGCACTGGTAGAATTCAC-----                                                                        | mirL    | 23  | 4565  |
| -----TATGGCACTGGTAGAATTCAC-----                                                                        | mirL    | 21  | 3769  |
| -----ATGGCACTGGTAGAATTCAC-----                                                                         | mirL    | 22  | 3542  |
| -----TATGGCACTGGTAGAATTC-----                                                                          | mirL    | 19  | 3364  |
| -----ATGGCACTGGTAGAATTCAC-----                                                                         | mirL    | 23  | 2864  |
| -----TATGGCACTGGTAGAATTCAC-----                                                                        | mirL    | 24  | 2377  |
| -----ATGGCACTGGTAGAATTCAC-----                                                                         | mirL    | 21  | 2025  |
| -----ATGGCACTGGTAGAATTCAC-----                                                                         | mirL    | 20  | 904   |
| -----ATGGCACTGGTAGAATTC-----                                                                           | mirL    | 18  | 401   |
| -----TGGCACTGGTAGAATTCAC-----                                                                          | mirL    | 22  | 18    |
| -----GGCACTGGTAGAATTCAC-----                                                                           | mirL    | 20  | 12    |
| -----GGCACTGGTAGAATTCAC-----                                                                           | mirL    | 19  | 10    |
| -----TGGCACTGGTAGAATTCAC-----                                                                          | mirL    | 21  | 10    |
| -----GGCACTGGTAGAATTCAC-----                                                                           | mirL    | 21  | 9     |
| -----GTATGGCACTGGTAGAATTCAC-----                                                                       | mirL    | 22  | 6     |
| -----TGGCACTGGTAGAATTCAC-----                                                                          | mirL    | 19  | 5     |
| -----TGGCACTGGTAGAATTCAC-----                                                                          | mirL    | 20  | 4     |
| -----GTATGGCACTGGTAGAATTC-----                                                                         | mirL    | 20  | 4     |
| -----TGGCACTGGTAGAATTCAC-----                                                                          | mirL    | 23  | 3     |
| -----GTATGGCACTGGTAGAATTCAC-----                                                                       | mirL    | 23  | 2     |
| -----GTATGGCACTGGTAGAATTCAC-----                                                                       | mirL    | 24  | 2     |
| -----GTATGGCACTGGTAGAATTCAC-----                                                                       | mirL    | 21  | 1     |
| -----GGCACTGGTAGAATTCAC-----                                                                           | mirL    | 23  | 1     |
| -----TGAATTACCGAAGGGCCATAA-----                                                                        | mirR    | 21  | 809   |
| -----TGAATTACCGAAGGGCCATA-----                                                                         | mirR    | 20  | 226   |



```

-----TGAATTACCGAAGGGCCAT----- mirR 19 188
-----GAATTACCGAAGGGCCATAA----- mirR 20 117
-----TGAATTACCGAAGGGCCATAAA----- mirR 22 89
-----GTGAATTACCGAAGGGCCATAA----- mirR 22 57
-----TGAATTACCGAAGGGCCATAAAC----- mirR 23 48
-----TGAATTACCGAAGGGCCA----- mirR 18 29
-----GAATTACCGAAGGGCCATA----- mirR 19 26
-----GTGAATTACCGAAGGGCCATA----- mirR 21 23
-----GAATTACCGAAGGGCCAT----- mirR 18 22
-----GAATTACCGAAGGGCCATAAA----- mirR 21 17
-----GTGAATTACCGAAGGGCC----- mirR 18 17
-----GTGAATTACCGAAGGGCCAT----- mirR 20 10
-----GTGAATTACCGAAGGGCCATAAA----- mirR 23 3
-----GTGAATTACCGAAGGGCCA----- mirR 19 2
-----AGTGAATTACCGAAGGGCCATAA----- mirR 23 2
-----AATTACCGAAGGGCCATA----- mirR 18 1
-----GTGAATTACCGAAGGGCCATAAAC----- mirR 24 1
-----ATTACCGAAGGGCCATAAA----- mirR 19 1
-----ATTACCGAAGGGCCATAA----- mirR 18 1
-----CAGAGCAGAGACAGATCCGCG morR 21 1
-----ACAGAGCAGAGACAGATCCG-- morR 20 1
-----TAAACAGAGCAGAGACAG----- morR 18 1

```

>mmu-mir-409

```

TCTCCGTGGTACTCGGAGAGAGTTACCCGAGCAACTTTGCATCTGGAGGACGAATGTTGCTCGGTGAACCCCTTTTCGGTATCAAATCCCT species len reads
TCTCCGTGGTACTCGGAGAG----- morL 20 1
-----AGGTTACCCGAGCAACTTTGCATC----- mirL 24 4278
-----AGGTTACCCGAGCAACTTTGC----- mirL 21 3232
-----AGGTTACCCGAGCAACTTTGCAT----- mirL 23 2077
-----AGGTTACCCGAGCAACTTTG----- mirL 20 553
-----AGGTTACCCGAGCAACTTTGCA----- mirL 22 454
-----GTTACCCGAGCAACTTTGC----- mirL 19 4
-----GAGGTTACCCGAGCAACTTTGC----- mirL 22 3
-----GGTTACCCGAGCAACTTTGCAT----- mirL 22 3
-----GAGGTTACCCGAGCAACTTTGCAT----- mirL 24 2
-----GGTTACCCGAGCAACTTTG----- mirL 19 1
-----GTTACCCGAGCAACTTTGCAT----- mirL 21 1
-----TTACCCGAGCAACTTTGCAT----- mirL 20 1
-----GAGGTTACCCGAGCAACT----- mirL 18 1
-----GAATGTTGCTCGGTGAACCCCT----- mirR 22 11350
-----AATGTTGCTCGGTGAACCCCT----- mirR 21 7906
-----AATGTTGCTCGGTGAACCCCT----- mirR 22 2834
-----GAATGTTGCTCGGTGAACCCCT----- mirR 23 2008
-----GAATGTTGCTCGGTGAAC----- mirR 18 1616
-----GAATGTTGCTCGGTGAACCC----- mirR 21 1566
-----AATGTTGCTCGGTGAACCC----- mirR 20 795

```

```

-----CGAATGTTGCTCGGTGAACCC----- mirR 22 643
-----GAATGTTGCTCGGTGAACC----- mirR 19 582
-----GAATGTTGCTCGGTGAACCC----- mirR 20 437
-----AATGTTGCTCGGTGAACCC----- mirR 19 405
-----AATGTTGCTCGGTGAACCCCTTT----- mirR 23 313
-----CGAATGTTGCTCGGTGAACCCCT----- mirR 23 299
-----CGAATGTTGCTCGGTGAAC----- mirR 19 206
-----AATGTTGCTCGGTGAACC----- mirR 18 187
-----GAATGTTGCTCGGTGAACCCCTTT----- mirR 24 151
-----CGAATGTTGCTCGGTGAACCCCTT----- mirR 24 85
-----CGAATGTTGCTCGGTGAACC----- mirR 20 79
-----TGTTGCTCGGTGAACCCCTTT----- mirR 21 67
-----AATGTTGCTCGGTGAACCCCTTT----- mirR 24 46
-----CGAATGTTGCTCGGTGAACCC----- mirR 21 44
-----CGAATGTTGCTCGGTGAA----- mirR 18 22
-----TGTTGCTCGGTGAACCCCTTTTC----- mirR 23 20
-----TGTTGCTCGGTGAACCCCTT----- mirR 20 13
-----TGTTGCTCGGTGAACCCCT----- mirR 19 13
-----TGTTGCTCGGTGAACCCCTTTT----- mirR 22 11
-----ATGTTGCTCGGTGAACCCCT----- mirR 20 10
-----TGTTGCTCGGTGAACCC----- mirR 18 7
-----ATGTTGCTCGGTGAACCCCTT----- mirR 21 6
-----ATGTTGCTCGGTGAACCCCTTT----- mirR 22 6
-----ATGTTGCTCGGTGAACCC----- mirR 19 5
-----ACGAATGTTGCTCGGTGAACCC----- mirR 23 2
-----ATGTTGCTCGGTGAACCC----- mirR 18 2
-----ATGTTGCTCGGTGAACCCCTTTTC----- mirR 24 2
-----ACGAATGTTGCTCGGTGAAC----- mirR 20 1
-----ACGAATGTTGCTCGGTGAACCCCTTT----- mirR 26 1
-----GACGAATGTTGCTCGGTGAACCC----- mirR 24 1
-----ACGAATGTTGCTCGGTGAACCCCTT----- mirR 25 1
-----TTTTCGGTATCAAATCCC----- morR 18 1
-----TTTCGGTATCAAATCCCT----- morR 18 1

```

>mmu-mir-872

```

GTAGATGGTAACTTGTTAGAAGGTTACTTGTAGTTCAGGACCTCATTACTTTCTGCCTGAACTATTGCAGTAGCCTCCTAAC species len reads
GTAGATGGTAACTTGTTAG----- morL 19 1
-----AAGGTTACTTGTAGTTCAG----- mirL 20 5257
-----AAGGTTACTTGTAGTTCAGG----- mirL 21 2032
-----AAGGTTACTTGTAGTTCAGGAC----- mirL 23 1079
-----AAGGTTACTTGTAGTTCAG----- mirL 19 825
-----AAGGTTACTTGTAGTTCAGGA----- mirL 22 709
-----AGGTTACTTGTAGTTCAGG----- mirL 20 4
-----AGGTTACTTGTAGTTCAG----- mirL 19 3
-----GGTTACTTGTAGTTCAGGA----- mirL 20 1
-----AGGTTACTTGTAGTTCAGGA----- mirL 21 1

```

```

-----AGGTTACTTGTTAGTTCAGGAC----- mirL 22 1
-----CTCATTACTTTCTGCCTGA----- loop 19 1
-----TGAACTATTGCAGTAGCCTCCT--- mirR 22 19848
-----TGAACTATTGCAGTAGCCTCC--- mirR 21 3691
-----TGAACTATTGCAGTAGCCTCCTA-- mirR 23 2873
-----TGAACTATTGCAGTAGCCTC----- mirR 20 1487
-----GAACTATTGCAGTAGCCTCCT--- mirR 21 1191
-----TGAACTATTGCAGTAGCC----- mirR 18 927
-----TGAACTATTGCAGTAGCCT----- mirR 19 741
-----TGAACTATTGCAGTAGCCTCCTAA- mirR 24 239
-----GAACTATTGCAGTAGCCTCCTA-- mirR 22 157
-----GAACTATTGCAGTAGCCTCC--- mirR 20 151
-----GAACTATTGCAGTAGCCTC----- mirR 19 85
-----GAACTATTGCAGTAGCCT----- mirR 18 29
-----GAACTATTGCAGTAGCCTCCTAA- mirR 23 12
-----CTGAACTATTGCAGTAGCCTCC--- mirR 22 10
-----GAACTATTGCAGTAGCCTCCTAAC mirR 24 9
-----CTGAACTATTGCAGTAGCCTCCT--- mirR 23 3
-----CTGAACTATTGCAGTAGC----- mirR 18 3
-----GCCTGAACTATTGCAGTA----- mirR 18 3
-----CTGAACTATTGCAGTAGCCTC----- mirR 21 2
-----CTGAACTATTGCAGTAGCCTCCTA-- mirR 24 2
-----ACTATTGCAGTAGCCTCCT--- mirR 19 2
-----AACTATTGCAGTAGCCTCCT--- mirR 20 1
-----CTGAACTATTGCAGTAGCCT----- mirR 20 1
-----CTGAACTATTGCAGTAGCC----- mirR 19 1

```

>mmu-mir-378

```

GGCTCCTGACTCCAGGTCCCTGTGTGTACCTCGAAATAGCACTGGACTTGGAGTCAGAAGGCTGAGTGGAGTCACCTTCC species len reads
--CTCCTGACTCCAGGTCCCTGTGT----- mirL 22 6184
---TCCTGACTCCAGGTCCCTGTGT----- mirL 21 387
--CTCCTGACTCCAGGTCCCTGTG----- mirL 21 321
--CTCCTGACTCCAGGTCCCTGT----- mirL 20 160
--CTCCTGACTCCAGGTCCCTG----- mirL 19 83
--CTCCTGACTCCAGGTCCCTGTGT----- mirL 23 69
---CCTGACTCCAGGTCCCTGTGT----- mirL 20 37
-GCTCCTGACTCCAGGTCCCTGT----- mirL 21 27
-GCTCCTGACTCCAGGTCCCTGTGT----- mirL 23 18
---TCCTGACTCCAGGTCCCTGTGTGT----- mirL 23 13
---TCCTGACTCCAGGTCCCTGTG----- mirL 20 9
---TCCTGACTCCAGGTCCCTGT----- mirL 19 9
---TCCTGACTCCAGGTCCCTG----- mirL 18 4
---CCTGACTCCAGGTCCCTGTGTGT----- mirL 22 3
GGCTCCTGACTCCAGGTCCCTGT----- mirL 22 2
---CCTGACTCCAGGTCCCTGTGTGT----- mirL 23 1
-GCTCCTGACTCCAGGTCC----- mirL 18 1

```

```

-GCTCCTGACTCCAGGTCCTG----- mirL 20 1
-GCTCCTGACTCCAGGTCCTGTG----- mirL 22 1
-----ACTGGACTTGGAGTCAGAAGGC----- mirR 22 13994
-----ACTGGACTTGGAGTCAGAAGG----- mirR 21 6215
-----ACTGGACTTGGAGTCAGAAGGCC----- mirR 23 5636
-----ACTGGACTTGGAGTCAGAAG----- mirR 20 3570
-----ACTGGACTTGGAGTCAGAA----- mirR 19 1159
-----ACTGGACTTGGAGTCAGA----- mirR 18 1017
-----ACTGGACTTGGAGTCAGAAGGCCT----- mirR 24 927
-----CTGGACTTGGAGTCAGAAGGC----- mirR 21 290
-----CTGGACTTGGAGTCAGAAGG----- mirR 20 185
-----CTGGACTTGGAGTCAGAAGGCC----- mirR 22 126
-----CTGGACTTGGAGTCAGAAG----- mirR 19 42
-----CTGGACTTGGAGTCAGAAGGCCT----- mirR 23 25
-----CTGGACTTGGAGTCAGAA----- mirR 18 15
-----CTGGACTTGGAGTCAGAAGGCCTG----- mirR 24 8
-----CACTGGACTTGGAGTCAGAAGGC----- mirR 23 7
-----CACTGGACTTGGAGTCAGAAGG----- mirR 22 7
-----GGACTTGGAGTCAGAAGGC----- mirR 19 5
-----TGGACTTGGAGTCAGAAGGC----- mirR 20 4
-----CACTGGACTTGGAGTCAGAAG----- mirR 21 3
-----CACTGGACTTGGAGTCAGAA----- mirR 20 3
-----TGGACTTGGAGTCAGAAGGCCT----- mirR 22 2
-----TGGACTTGGAGTCAGAAGG----- mirR 19 2
-----TGGACTTGGAGTCAGAAGGCC----- mirR 21 2
-----GCACTGGACTTGGAGTCAGAAG----- mirR 22 2
-----GGACTTGGAGTCAGAAGGCC----- mirR 20 1
-----GCACTGGACTTGGAGTCAGAAGGC----- mirR 24 1
-----AGCACTGGACTTGGAGTC----- mirR 18 1
-----CACTGGACTTGGAGTCAGAAGGCC----- mirR 24 1
-----TGGACTTGGAGTCAGAAGGCCTG----- mirR 23 1
-----CACTGGACTTGGAGTCAGA----- mirR 19 1
-----GCACTGGACTTGGAGTCA----- mirR 18 1
-----TGAGTGGAGTCACCTTCC morR 18 1
-----GCCTGAGTGGAGTCACCTTC- morR 20 1

```

>mmu-mir-668

```

TCAAGGCTATCACCATCCCCCTTCAGGTAAGTGTGCCTCGGGTGAGCATGCACTTAATGTAGGTGTATGTCACTCGGCTCGGCCACTACCC species len reads
TCAAGGCTATCACCATCCCCCTTC----- morL 24 1
-----GTAAGTGTGCCTCGGGTGAGC----- mirL 21 17
-----GTAAGTGTGCCTCGGGTGAGCATG----- mirL 25 13
-----GTAAGTGTGCCTCGGGTGAGCAT----- mirL 23 4
-----GTAAGTGTGCCTCGGGTGA----- mirL 19 3
-----GTAAGTGTGCCTCGGGTGAGCA----- mirL 22 3
-----AAGTGTGCCTCGGGTGAGCATGC----- mirL 23 2
-----AGTGTGCCTCGGGTGAGCATGCACTTAA----- mirL 28 1

```

```

-----TAAGTGTGCCTCGGGTGAGCATGC----- mirL 24 1
-----TAAGTGTGCCTCGGGTGAGCA----- mirL 21 1
-----AGTGTGCCTCGGGTGAGCATGCAC----- mirL 24 1
-----TAAGTGTGCCTCGGGTGAGCATGCA----- mirL 25 1
-----TAAGTGTGCCTCGGGTGAGCAT----- mirL 22 1
-----AAGTGTGCCTCGGGTGAGCA----- mirL 20 1
-----GCATGCACTTAATGTAGGTGT----- loop 21 1
-----TGTCACTCGGCTCGGCCACTAC-- mirR 23 9988
-----TGTCACTCGGCTCGGCCACTACCC mirR 25 8757
-----TGTCACTCGGCTCGGCCACT---- mirR 21 5362
-----TGTCACTCGGCTCGGCCAC---- mirR 20 4232
-----TGTCACTCGGCTCGGCCACTACC- mirR 24 2860
-----ATGTCACTCGGCTCGGCCACT--- mirR 22 1382
-----TGTCACTCGGCTCGGCCACTA-- mirR 22 1245
-----ATGTCACTCGGCTCGGCCAC---- mirR 21 960
-----TGTCACTCGGCTCGGCC----- mirR 18 947
-----TATGTCACTCGGCTCGGCCAC---- mirR 22 786
-----GTCACTCGGCTCGGCCACTAC-- mirR 22 460
-----GTCACTCGGCTCGGCCACTACCC mirR 24 383
-----GTCACTCGGCTCGGCCACT---- mirR 20 360
-----ATGTCACTCGGCTCGGCCACTACC- mirR 25 315
-----ATGTCACTCGGCTCGGCC----- mirR 19 225
-----ATGTCACTCGGCTCGGCCACTAC-- mirR 24 218
-----ATGTCACTCGGCTCGGCCACTA-- mirR 23 186
-----GTCACTCGGCTCGGCCAC---- mirR 19 178
-----GTCACTCGGCTCGGCCACTACC- mirR 23 168
-----TATGTCACTCGGCTCGGCCACT--- mirR 23 148
-----GTCACTCGGCTCGGCCACTA-- mirR 21 140
-----ATGTCACTCGGCTCGGCC----- mirR 18 135
-----TATGTCACTCGGCTCGGCC----- mirR 20 89
-----TATGTCACTCGGCTCGGCC----- mirR 19 70
-----TATGTCACTCGGCTCGGCCACTA-- mirR 24 65
-----TATGTCACTCGGCTCGGCCACTAC-- mirR 25 60
-----TATGTCACTCGGCTCGGCCA----- mirR 21 48
-----GTCACTCGGCTCGGCCA----- mirR 18 34
-----TCACTCGGCTCGGCCACTACCC mirR 23 6
-----TCACTCGGCTCGGCCACTACC- mirR 22 4
-----TCACTCGGCTCGGCCACT---- mirR 19 4
-----CACTCGGCTCGGCCACT---- mirR 18 3
-----CACTCGGCTCGGCCACTAC-- mirR 20 3
-----TCACTCGGCTCGGCCACTAC-- mirR 21 3
-----CACTCGGCTCGGCCACTACC- mirR 21 2
-----TCACTCGGCTCGGCCACTA-- mirR 20 1
-----GTATGTCACTCGGCTCGGCCAC---- mirR 23 1
-----GTATGTCACTCGGCTCGGCCACTAC-- mirR 26 1
-----CACTCGGCTCGGCCACTACCC mirR 22 1

```

```

-----GTATGTCACTCGGCTCGGCC----- mirR 20 1

>mmu-mir-667
TTTCCATCTAGTGGGTACTGGCCTCGGTGCTGGTGGAGCAGTGAGCACGCCATACATTATATCTGTGACACCTGCCACCCAGCCCAAGGCC species len reads
-TTCCATCTAGTGGGTACTGGC----- morL 21 1
-----ATCTAGTGGGTACTGGCC----- morL 18 1
TTTCCATCTAGTGGGTACTGGCCTC----- morL 25 1
-----CGGTGCTGGTGGAGCAGTGAGC----- mirL 22 115
-----CGGTGCTGGTGGAGCAGTGAGCAC----- mirL 24 60
-----CGGTGCTGGTGGAGCAGTGA----- mirL 20 39
-----CGGTGCTGGTGGAGCAGTGAG----- mirL 21 34
-----CGGTGCTGGTGGAGCAGTG----- mirL 19 13
-----GGTGCTGGTGGAGCAGTGAGC----- mirL 21 5
-----GGTGCTGGTGGAGCAGTGAGCAC----- mirL 23 3
-----TCGGTGCTGGTGGAGCAGTGAGC----- mirL 23 3
-----TCGGTGCTGGTGGAGCAGTGA----- mirL 21 2
-----TCGGTGCTGGTGGAGCAGTG----- mirL 20 2
-----GGTGCTGGTGGAGCAGTGAGCACGC----- mirL 25 2
-----TCGGTGCTGGTGGAGCAGTGAG----- mirL 22 1
-----CCTCGGTGCTGGTGGAGCAGTGAGC----- mirL 25 1
-----GGTGCTGGTGGAGCAGTGA----- mirL 19 1
-----TGCTGGTGGAGCAGTGAG----- mirL 18 1
-----GGTGCTGGTGGAGCAGTGAGCA----- mirL 22 1
-----TGCTGGTGGAGCAGTGAGCAC----- mirL 21 1
-----TGACACCTGCCACCCAGCCCAA----- mirR 22 13035
-----TGACACCTGCCACCCAGCCC----- mirR 20 7291
-----TGACACCTGCCACCCAGCCCAAG----- mirR 23 4239
-----TGACACCTGCCACCCAGCC----- mirR 19 3342
-----TGACACCTGCCACCCAGCCCA----- mirR 21 3146
-----GACACCTGCCACCCAGCCCAA----- mirR 21 2125
-----TGACACCTGCCACCCAGC----- mirR 18 1313
-----GACACCTGCCACCCAGCCCAAG----- mirR 22 1079
-----GACACCTGCCACCCAGCCC----- mirR 19 957
-----TGACACCTGCCACCCAGCCCAAGG----- mirR 24 714
-----GACACCTGCCACCCAGCCCA----- mirR 20 411
-----GACACCTGCCACCCAGCC----- mirR 18 408
-----GACACCTGCCACCCAGCCCAAGG----- mirR 23 143
-----ACACCTGCCACCCAGCCCAA----- mirR 20 68
-----ACACCTGCCACCCAGCCCAAG----- mirR 21 46
-----GACACCTGCCACCCAGCCCAAGGCC----- mirR 25 38
-----ACACCTGCCACCCAGCCC----- mirR 18 31
-----ACACCTGCCACCCAGCCCA----- mirR 19 28
-----ACACCTGCCACCCAGCCCAAGG----- mirR 22 13
-----GTGACACCTGCCACCCAGCCCAA----- mirR 23 7
-----ACACCTGCCACCCAGCCCAAGGC----- mirR 23 6
-----GTGACACCTGCCACCCAGCC----- mirR 20 6

```

```

-----GTGACACCTGCCACCCAGCCCA----- mirR 22 5
-----GTGACACCTGCCACCCAGCCC----- mirR 21 4
-----CTGTGACACCTGCCACCC----- mirR 18 3
-----TGTGACACCTGCCACCCAGCCC----- mirR 22 3
-----CTGTGACACCTGCCACCCAGCCC----- mirR 23 2
-----GTGACACCTGCCACCCAGC----- mirR 19 2
-----CACCTGCCACCCAGCCCA----- mirR 18 2
-----TGTGACACCTGCCACCCAGCCCAA----- mirR 24 1
-----CTGTGACACCTGCCACCCAG----- mirR 20 1
-----CACCTGCCACCCAGCCCAAGGCC----- mirR 23 1
-----CACCTGCCACCCAGCCCAAG----- mirR 20 1
-----CTGTGACACCTGCCACCCAGC----- mirR 21 1
-----GTGACACCTGCCACCCAGCCCAAG----- mirR 24 1
-----TGTGACACCTGCCACCCAGC----- mirR 20 1
-----TGTGACACCTGCCACCCAGCC----- mirR 21 1
-----CACCTGCCACCCAGCCCAA----- mirR 19 1

```

>mmu-mir-101b

| sequence                                                                                       | species | len | reads |
|------------------------------------------------------------------------------------------------|---------|-----|-------|
| GACTGAACTGCCCTTTTTTCGGTTATCATGGTACCGATGCTGTAGCTCTGAAAGGTACAGTACTGTGATAGCTGAAGAATGGCGGTGCCATCAC | mirL    | 18  | 9     |
| ---TGAAGTGCCTTTTTTCGG---                                                                       | mirL    | 19  | 7     |
| ---TGAAGTGCCTTTTTTCGGT---                                                                      | mirL    | 20  | 1     |
| GACTGAACTGCCCTTTTTTCG                                                                          | mirL    | 20  | 1     |
| ---TGAAGTGCCTTTTTTCGGTT---                                                                     | mirL    | 18  | 1     |
| -----AACTGCCCTTTTTTCGGTT-----                                                                  | mirR    | 22  | 9876  |
| -----GTACAGTACTGTGATAGCTGAA-----                                                               | mirR    | 21  | 7785  |
| -----GTACAGTACTGTGATAGCTGA-----                                                                | mirR    | 22  | 3043  |
| -----TACAGTACTGTGATAGCTGAAG-----                                                               | mirR    | 21  | 2863  |
| -----TACAGTACTGTGATAGCTGAA-----                                                                | mirR    | 20  | 2765  |
| -----TACAGTACTGTGATAGCTGA-----                                                                 | mirR    | 18  | 2585  |
| -----GTACAGTACTGTGATAGC-----                                                                   | mirR    | 23  | 1753  |
| -----GTACAGTACTGTGATAGCTGAAG-----                                                              | mirR    | 20  | 1402  |
| -----GTACAGTACTGTGATAGCTG-----                                                                 | mirR    | 23  | 1178  |
| -----TACAGTACTGTGATAGCTGAAGA-----                                                              | mirR    | 19  | 967   |
| -----GTACAGTACTGTGATAGCT-----                                                                  | mirR    | 19  | 560   |
| -----TACAGTACTGTGATAGCTG-----                                                                  | mirR    | 22  | 459   |
| -----ACAGTACTGTGATAGCTGAAGA-----                                                               | mirR    | 20  | 374   |
| -----ACAGTACTGTGATAGCTGAA-----                                                                 | mirR    | 21  | 347   |
| -----ACAGTACTGTGATAGCTGAAG-----                                                                | mirR    | 19  | 308   |
| -----ACAGTACTGTGATAGCTGA-----                                                                  | mirR    | 18  | 291   |
| -----TACAGTACTGTGATAGCTGAAGAA-----                                                             | mirR    | 24  | 169   |
| -----GTACAGTACTGTGATAGCTGAAGA-----                                                             | mirR    | 23  | 88    |
| -----ACAGTACTGTGATAGCTGAAGAA-----                                                              | mirR    | 18  | 54    |
| -----ACAGTACTGTGATAGCTG-----                                                                   | mirR    | 21  | 17    |
| -----CAGTACTGTGATAGCTGAAGA-----                                                                | mirR    | 19  | 8     |
| -----CAGTACTGTGATAGCTGAA-----                                                                  |         |     |       |

```

-----CAGTACTGTGATAGCTGAAGAA----- mirR 22 8
-----CAGTACTGTGATAGCTGAAG----- mirR 20 7
-----ACAGTACTGTGATAGCTGAAGAAT----- mirR 24 4
-----CAGTACTGTGATAGCTGA----- mirR 18 4
-----CAGTACTGTGATAGCTGAAGAAT----- mirR 23 3
-----GGTACAGTACTGTGATAGCTGA----- mirR 22 3
-----GGTACAGTACTGTGATAGCTGAA----- mirR 23 3
-----GGTACAGTACTGTGATAGC----- mirR 19 2
-----AGGTACAGTACTGTGATAG----- mirR 19 1
-----AGGTACAGTACTGTGATAGCTGA----- mirR 23 1
-----AGGTACAGTACTGTGATAGCTGAA----- mirR 24 1
-----GAATGGCGGTGCCATCAC morR 18 1
-----AGAATGGCGGTGCCATCA----- morR 18 1

```

>mmu-mir-92a-1

```

CAGGTTGGGATTTGTCGCAATGCTGTGTTTCTGTATGGTATTGCACTTGTCCCGGCCTGTTGAGTTTGGTGGGGATTG species len reads
-AGGTTGGGATTTGTCGCAATGC----- mirL 22 24
-AGGTTGGGATTTGTCGCAA----- mirL 19 10
-AGGTTGGGATTTGTCGCAAT----- mirL 20 4
-AGGTTGGGATTTGTCGCAATG----- mirL 21 4
CAGGTTGGGATTTGTCGC----- mirL 18 3
-AGGTTGGGATTTGTCGCA----- mirL 18 2
-----TATTGCACTTGTCCCGGCCTGT----- mirR 22 18786
-----TATTGCACTTGTCCCGGCC----- mirR 19 3648
-----TATTGCACTTGTCCCGGCCTG----- mirR 21 2407
-----TATTGCACTTGTCCCGGC----- mirR 18 2253
-----TATTGCACTTGTCCCGGCCTGTTG----- mirR 24 2013
-----TATTGCACTTGTCCCGGCCTGTT----- mirR 23 1925
-----ATTGCACTTGTCCCGGCCTGT----- mirR 21 1700
-----TATTGCACTTGTCCCGGCCT----- mirR 20 1362
-----ATTGCACTTGTCCCGGCCTGTTG----- mirR 23 326
-----ATTGCACTTGTCCCGGCCTG----- mirR 20 260
-----ATTGCACTTGTCCCGGCCT----- mirR 19 206
-----ATTGCACTTGTCCCGGCC----- mirR 18 203
-----ATTGCACTTGTCCCGGCCTGTT----- mirR 22 202
-----TGCACCTTGTCCCGGCCTGT----- mirR 19 4
-----TTGCACTTGTCCCGGCCTGT----- mirR 20 4
-----ATTGCACTTGTCCCGGCCTGTTGA----- mirR 24 3
-----TGCACCTTGTCCCGGCCTGTTG----- mirR 21 2
-----TTGCACTTGTCCCGGCCTGTTG----- mirR 22 2
-----TTGCACTTGTCCCGGCCTGTT----- mirR 21 1
-----TTGCACTTGTCCCGGCCTG----- mirR 19 1
-----TTGCACTTGTCCCGGCCTG----- mirR 19 1
-----TGAGTTTGGTGGGGATTG morR 18 1

```

>mmu-mir-1839

```

GAAAAGGTAGATAGAACAGGTCTTGTGTTGCAAAATAAATTCAAGACCTACTTATCTACCAACAGCCAT species len reads

```



```
---AAGGTAGATAGAACAGGTCTTG----- mirL 22 11899
---AAGGTAGATAGAACAGGTCTTGT----- mirL 23 4132
---AAGGTAGATAGAACAGGTC----- mirL 19 3805
---AAGGTAGATAGAACAGGTCTT----- mirL 21 3618
---AAGGTAGATAGAACAGGTCT----- mirL 20 2244
---AGGTAGATAGAACAGGTCTTG----- mirL 21 1143
---AGGTAGATAGAACAGGTCTTGT----- mirL 22 641
---AGGTAGATAGAACAGGTCTT----- mirL 20 293
---AGGTAGATAGAACAGGTCT----- mirL 19 184
---AGGTAGATAGAACAGGTCTTGT----- mirL 23 150
---AAAGGTAGATAGAACAGGTCTT----- mirL 22 40
---AAAGGTAGATAGAACAGGTCT----- mirL 21 35
---AAAGGTAGATAGAACAGGTCTTG----- mirL 23 27
---AAAGGTAGATAGAACAGGTC----- mirL 20 24
---AAAGGTAGATAGAACAGGTCTTGT----- mirL 24 10
---AAAAGGTAGATAGAACAGGTC----- mirL 21 3
---AAAAGGTAGATAGAACAGGTCT----- mirL 22 3
---GGTAGATAGAACAGGTCTTGT----- mirL 21 2
---GGTAGATAGAACAGGTCTTGT----- mirL 22 2
---GGTAGATAGAACAGGTCTT----- mirL 19 2
---GTAGATAGAACAGGTCTTG----- mirL 19 2
---GTAGATAGAACAGGTCTTGT----- mirL 20 1
---GGTAGATAGAACAGGTCTTG----- mirL 20 1
GAAAAGGTAGATAGAACAG----- mirL 19 1
---AAAAGGTAGATAGAACAGGTCTT----- mirL 23 1
---GTAGATAGAACAGGTCTT----- mirL 18 1
-----GTTTGCAAATAAATTCAA----- loop 19 1
-----AGACCTACTTATCTACCAACA----- mirR 21 2405
-----AGACCTACTTATCTACCAACAGC--- mirR 23 858
-----AGACCTACTTATCTACCAAC----- mirR 20 694
-----AGACCTACTTATCTACCAACAG--- mirR 22 417
-----AGACCTACTTATCTACCAACAGCC-- mirR 24 218
-----AGACCTACTTATCTACCAA----- mirR 19 207
-----AGACCTACTTATCTACCA----- mirR 18 94
-----AAGACCTACTTATCTACCAACA----- mirR 22 16
-----ACCTACTTATCTACCAACAGCC-- mirR 22 8
-----CAAGACCTACTTATCTACCAAC----- mirR 22 8
-----AAGACCTACTTATCTACCAAC----- mirR 21 6
-----AAGACCTACTTATCTACCAACAGCC-- mirR 25 4
-----CAAGACCTACTTATCTACCA----- mirR 20 4
-----CAAGACCTACTTATCTACCAA----- mirR 21 4
-----GACCTACTTATCTACCAACA----- mirR 20 3
-----TCAAGACCTACTTATCTACCA----- mirR 21 3
-----AAGACCTACTTATCTACCA----- mirR 19 3
-----AAGACCTACTTATCTACCAA----- mirR 20 3
-----GACCTACTTATCTACCAACAG--- mirR 21 3
```

```

-----GACCTACTTATCTACCAAC----- mirR 19 2
-----GACCTACTTATCTACCAACAGC--- mirR 22 2
-----ACCTACTTATCTACCAACAGC--- mirR 21 2
-----GACCTACTTATCTACCAACAGCC-- mirR 23 2
-----TCAAGACCTACTTATCTACCAA----- mirR 22 1
-----TCAAGACCTACTTATCTACC----- mirR 20 1
-----TCAAGACCTACTTATCTAC----- mirR 19 1
-----TCAAGACCTACTTATCTACCAAC----- mirR 23 1
-----AAGACCTACTTATCTACCAACAGC--- mirR 24 1
-----ACCTACTTATCTACCAACAGCCAT mirR 24 1
-----CAAGACCTACTTATCTACC----- mirR 19 1
-----AAGACCTACTTATCTACC----- mirR 18 1

```

>mmu-mir-19b-1

```

TTAGTTTTGCAGGTTTGCATCCAGCTGTATAATATTCTGCTGTGCAAATCCATGCAAAACTGAC species len reads
--AGTTTTGCAGGTTTGCATCCAGC----- mirL 23 111
--AGTTTTGCAGGTTTGCATCCAG----- mirL 22 22
--AGTTTTGCAGGTTTGCATCC----- mirL 20 22
--AGTTTTGCAGGTTTGCATCCA----- mirL 21 12
--AGTTTTGCAGGTTTGCATC----- mirL 19 11
TTAGTTTTGCAGGTTTGCAT----- mirL 19 1
-----TGTGCAAATCCATGCAAAACTGA- mirR 23 10065
-----TGTGCAAATCCATGCAAAACTG-- mirR 22 9232
-----TGTGCAAATCCATGCAAAACTGAC mirR 24 6271
-----TGTGCAAATCCATGCAAAACT--- mirR 21 2909
-----TGTGCAAATCCATGCAAAAC---- mirR 20 1759
-----TGTGCAAATCCATGCAAAA----- mirR 19 997
-----GTGCAAATCCATGCAAAACTGAC mirR 23 420
-----GTGCAAATCCATGCAAAACTG-- mirR 21 412
-----GTGCAAATCCATGCAAAACTGA- mirR 22 402
-----TGTGCAAATCCATGCAAAA----- mirR 18 216
-----GTGCAAATCCATGCAAAACT--- mirR 20 165
-----GTGCAAATCCATGCAAAAC---- mirR 19 83
-----GTGCAAATCCATGCAAAA----- mirR 18 52
-----CTGTGCAAATCCATGCAAAACT--- mirR 22 13
-----CTGTGCAAATCCATGCAAAACTGA- mirR 24 7
-----TGCAAATCCATGCAAAACTG-- mirR 20 4
-----CTGTGCAAATCCATGCAAAACTG-- mirR 23 3
-----CTGTGCAAATCCATGCAAAACTGAC mirR 25 3
-----CTGTGCAAATCCATGCAAAAC---- mirR 21 2
-----CTGTGCAAATCCATGCAAAA----- mirR 20 1
-----TGCAAATCCATGCAAAACTGA- mirR 21 1

```

>mmu-mir-344-1

```

AGTCAGGCTCCTGGCTAGATTCCAGGTACCAGCTGGTACCTGATCTAGCCAAAGCCTGACTGTAA species len reads
--TCAGGCTCCTGGCTAGATTCC----- mirL 21 5

```

```

--TCAGGCTCCTGGCTAGATTCCA----- mirL 22 3
AGTCAGGCTCCTGGCTAGATTCC----- mirL 23 3
--TCAGGCTCCTGGCTAGATTC----- mirL 20 1
AGTCAGGCTCCTGGCTAGATTC----- mirL 22 1
----AGGCTCCTGGCTAGATTCC----- mirL 19 1
AGTCAGGCTCCTGGCTAGAT----- mirL 20 1
-----TGATCTAGCCAAAGCCTGACTGT-- mirR 23 20156
-----TGATCTAGCCAAAGCCTGAC----- mirR 20 3908
-----TGATCTAGCCAAAGCCTGACTG--- mirR 22 2499
-----TGATCTAGCCAAAGCCTGACT--- mirR 21 2295
-----GATCTAGCCAAAGCCTGACTGT-- mirR 22 1539
-----TGATCTAGCCAAAGCCTGACTGTA- mirR 24 511
-----TGATCTAGCCAAAGCCTGA----- mirR 19 446
-----GATCTAGCCAAAGCCTGAC----- mirR 19 195
-----CCTGATCTAGCCAAAGCCTGA----- mirR 21 127
-----TGATCTAGCCAAAGCCTG----- mirR 18 117
-----GATCTAGCCAAAGCCTGACT--- mirR 20 116
-----GATCTAGCCAAAGCCTGACTG--- mirR 21 43
-----GATCTAGCCAAAGCCTGACTGTA- mirR 23 39
-----GATCTAGCCAAAGCCTGA----- mirR 18 30
-----CCTGATCTAGCCAAAGCCTGAC----- mirR 22 16
-----CCTGATCTAGCCAAAGCCTG----- mirR 20 6
-----GATCTAGCCAAAGCCTGACTGTAA mirR 24 4
-----CTGATCTAGCCAAAGCCTGAC----- mirR 21 4
-----ACCTGATCTAGCCAAAGCCTGAC----- mirR 23 3
-----CTGATCTAGCCAAAGCCTGACTGT-- mirR 24 3
-----CCTGATCTAGCCAAAGCCT----- mirR 19 3
-----ATCTAGCCAAAGCCTGACTGT-- mirR 21 2
-----ACCTGATCTAGCCAAAGCCTGA----- mirR 22 2
-----CTGATCTAGCCAAAGCCTGACT--- mirR 22 2
-----TCTAGCCAAAGCCTGACTGT-- mirR 20 1
-----TCTAGCCAAAGCCTGACTGTAA mirR 22 1
-----ACCTGATCTAGCCAAAGCCTG----- mirR 21 1
-----ATCTAGCCAAAGCCTGACT--- mirR 19 1
-----CCTGATCTAGCCAAAGCCTGACTGT-- mirR 25 1
-----CCTGATCTAGCCAAAGCC----- mirR 18 1
-----TCTAGCCAAAGCCTGACTG--- mirR 19 1

>mmu-mir-344-2
AGTCAGGCTCCTGGCTAGATTCCAGGTACCAACTGGTACCTGATCTAGCCAAAGCCTGACTGTAA species len reads
--TCAGGCTCCTGGCTAGATTCC----- mirL 21 5
--TCAGGCTCCTGGCTAGATTCCA----- mirL 22 3
AGTCAGGCTCCTGGCTAGATTCC----- mirL 23 3
AGTCAGGCTCCTGGCTAGATTC----- mirL 22 1
AGTCAGGCTCCTGGCTAGAT----- mirL 20 1
----AGGCTCCTGGCTAGATTCC----- mirL 19 1

```

```

--TCAGGCTCCTGGCTAGATTC----- mirL 20 1
-----TGATCTAGCCAAAGCCTGACTGT-- mirR 23 20156
-----TGATCTAGCCAAAGCCTGAC----- mirR 20 3908
-----TGATCTAGCCAAAGCCTGACTG--- mirR 22 2499
-----TGATCTAGCCAAAGCCTGACT--- mirR 21 2295
-----GATCTAGCCAAAGCCTGACTGT-- mirR 22 1539
-----TGATCTAGCCAAAGCCTGACTGTA- mirR 24 511
-----TGATCTAGCCAAAGCCTGA----- mirR 19 446
-----GATCTAGCCAAAGCCTGAC----- mirR 19 195
-----CCTGATCTAGCCAAAGCCTGA----- mirR 21 127
-----TGATCTAGCCAAAGCCTG----- mirR 18 117
-----GATCTAGCCAAAGCCTGACT--- mirR 20 116
-----GATCTAGCCAAAGCCTGACTG--- mirR 21 43
-----GATCTAGCCAAAGCCTGACTGTA- mirR 23 39
-----GATCTAGCCAAAGCCTGA----- mirR 18 30
-----CCTGATCTAGCCAAAGCCTGAC----- mirR 22 16
-----CCTGATCTAGCCAAAGCCTG----- mirR 20 6
-----CTGATCTAGCCAAAGCCTGAC----- mirR 21 4
-----GATCTAGCCAAAGCCTGACTGTAA mirR 24 4
-----ACCTGATCTAGCCAAAGCCTGAC----- mirR 23 3
-----CCTGATCTAGCCAAAGCCT----- mirR 19 3
-----CTGATCTAGCCAAAGCCTGACTGT-- mirR 24 3
-----ATCTAGCCAAAGCCTGACTGT-- mirR 21 2
-----ACCTGATCTAGCCAAAGCCTGA----- mirR 22 2
-----CTGATCTAGCCAAAGCCTGACT--- mirR 22 2
-----CCTGATCTAGCCAAAGCCTGACTGT-- mirR 25 1
-----TCTAGCCAAAGCCTGACTG--- mirR 19 1
-----TCTAGCCAAAGCCTGACTGT-- mirR 20 1
-----ATCTAGCCAAAGCCTGACT--- mirR 19 1
-----CCTGATCTAGCCAAAGCC----- mirR 18 1
-----ACCTGATCTAGCCAAAGCCTG----- mirR 21 1
-----TCTAGCCAAAGCCTGACTGTAA mirR 22 1

>mmu-mir-376c
GGTGGATATCCTTCTATGTTTATGCTTTTTGTGATTAACATAGAGGAAATTTACGTTTTTCAGTGTCAAATGCTGCT species len reads
-GTGGATATTCCTTCTATGTTTAT----- mirL 22 428
-GTGGATATTCCTTCTATGTTT----- mirL 21 402
-GTGGATATTCCTTCTATGTT----- mirL 20 345
-GTGGATATTCCTTCTATGT----- mirL 19 145
-GTGGATATTCCTTCTATGTTTAT----- mirL 23 76
--TGGATATTCCTTCTATGTTTAT----- mirL 21 30
--TGGATATTCCTTCTATGTTT----- mirL 20 26
--TGGATATTCCTTCTATGT----- mirL 19 11
GGTGGATATTCCTTCTATGTT----- mirL 21 9
--TGGATATTCCTTCTATGT----- mirL 18 9
--TGGATATTCCTTCTATGTTTAT----- mirL 22 8

```

```

GGTGGATATTCCTTCTATGT----- mirL 20 7
GGTGGATATTCCTTCTATGTTT----- mirL 22 5
---GGATATTCCTTCTATGTTT----- mirL 19 4
GGTGGATATTCCTTCTATGTFTA----- mirL 23 2
GGTGGATATTCCTTCTATGTTTAT----- mirL 24 1
---GGATATTCCTTCTATGTFTA----- mirL 20 1
-----AACATAGAGGAAATTTACAGT----- mirR 21 25895
-----AACATAGAGGAAATTTACGTT----- mirR 22 3010
-----AACATAGAGGAAATTTAC----- mirR 19 901
-----AACATAGAGGAAATTTACG----- mirR 20 355
-----AACATAGAGGAAATTTCA----- mirR 18 188
-----AACATAGAGGAAATTTACGTTT----- mirR 23 87
-----ACATAGAGGAAATTTACAGT----- mirR 20 33
-----AAACATAGAGGAAATTTACAGT----- mirR 22 29
-----ACATAGAGGAAATTTACGTT----- mirR 21 19
-----AACATAGAGGAAATTTACGTTT----- mirR 24 5
-----CATAGAGGAAATTTACAGT----- mirR 19 2
-----ACATAGAGGAAATTTACGTTTC----- mirR 24 1
-----TAAACATAGAGGAAATTTAC----- mirR 21 1
-----AAACATAGAGGAAATTTCA----- mirR 19 1
-----AAACATAGAGGAAATTTAC----- mirR 20 1
-----ACATAGAGGAAATTTACGTTT----- mirR 22 1
-----TAAACATAGAGGAAATTTACG----- mirR 22 1
-----ATAGAGGAAATTTACAGT----- mirR 18 1
-----TTTCAGTGTCAAATGCTGCT morR 20 1

```

>mmu-mir-7b

```

AGTACGTGAGCCAGTGCTATGTGGAAGACTTGTGATTTTGTGTTCTGATATGATATGACAACAAGTCACAGCCAGCCTCATA species len reads
AGTACGTGAGCCAGTGCT----- morL 18 1
--TACGTGAGCCAGTGCTATG----- morL 19 1
-----TGGAAGACTTGTGATTTTGTGTTT----- mirL 25 9820
-----TGGAAGACTTGTGATTTTGTGTT----- mirL 24 8053
-----TGGAAGACTTGTGATTTTGTGTT----- mirL 23 5968
-----TGGAAGACTTGTGATTTTGT----- mirL 20 3764
-----TGGAAGACTTGTGATTTTGTG----- mirL 22 1968
-----GGAAGACTTGTGATTTTGTGTTT----- mirL 24 672
-----GGAAGACTTGTGATTTTGTGTT----- mirL 23 383
-----GGAAGACTTGTGATTTTGTGTT----- mirL 22 302
-----GGAAGACTTGTGATTTTGT----- mirL 19 86
-----GGAAGACTTGTGATTTTGTG----- mirL 21 68
-----AAGACTTGTGATTTTGTGTT----- mirL 20 4
-----AAGACTTGTGATTTTGTGTT----- mirL 21 3
-----GTGGAAGACTTGTGATTTTGTGTT----- mirL 25 3
-----AAGACTTGTGATTTTGTG----- mirL 19 2
-----GTGGAAGACTTGTGATTTTGT----- mirL 22 2
-----GAAGACTTGTGATTTTGTGTTT----- mirL 23 2

```

```

-----GTGGAAGACTTGTGATTTTGTGTG----- mirL 24 1
-----AAGACTTGTGATTTTGTGTGTTTC----- mirL 22 1
-----CAACAAGTCACAGCCAGCCTCA----- mirR 22 200
-----CAACAAGTCACAGCCAGCCTC----- mirR 21 84
-----CAACAAGTCACAGCCAGCC----- mirR 19 35
-----CAACAAGTCACAGCCAGCCTCAT----- mirR 23 34
-----CAACAAGTCACAGCCAGCCT----- mirR 20 25
-----CAACAAGTCACAGCCAGC----- mirR 18 22
-----AACAAAGTCACAGCCAGCCTCA----- mirR 21 10
-----ACAAGTCACAGCCAGCCTCAT----- mirR 21 3
-----AACAAAGTCACAGCCAGCCTCAT----- mirR 22 3
-----ACAAGTCACAGCCAGCCTC----- mirR 19 2
-----AACAAAGTCACAGCCAGCC----- mirR 18 2
-----CAACAAGTCACAGCCAGCCTCATA----- mirR 24 1
-----ACAACAAGTCACAGCCAGCCTC----- mirR 22 1
-----GACAACAAGTCACAGCCAGCC----- mirR 21 1
-----GACAACAAGTCACAGCCAGC----- mirR 20 1
-----AACAAAGTCACAGCCAGCCTCATA----- mirR 23 1
-----ACAAGTCACAGCCAGCCTCA----- mirR 20 1
-----ACAACAAGTCACAGCCAGCCTCAT----- mirR 24 1

```

>mmu-mir-383

```

ACTCCACGTCACCTGCTCCTCAGATCAGAAGGTGACTGTGGCTTTGGGTGGATATTAATCAGCCACAGCACTGCCTGGTCAGAAAGAGCAAGTGTCTAGCCTTTTACCTCATGACACC species len reads
ACTCCACGTCACCTGCTCCTC----- morL 19 1
ACTCCACGTCACCTGCTCCTCA----- morL 22 1
-----CGTCACCTGCTCCTCAGA----- morL 18 1
-----AGATCAGAAGGTGACTGTGGCT----- mirL 22 7028
-----CAGATCAGAAGGTGACTGTGGC----- mirL 22 5291
-----CAGATCAGAAGGTGACTGTGG----- mirL 21 4174
-----AGATCAGAAGGTGACTGTGGC----- mirL 21 4088
-----AGATCAGAAGGTGACTGTGG----- mirL 20 3479
-----CAGATCAGAAGGTGACTGTG----- mirL 20 1392
-----AGATCAGAAGGTGACTGTG----- mirL 19 1392
-----CAGATCAGAAGGTGACTGTGGCT----- mirL 23 1362
-----AGATCAGAAGGTGACTGTGGCTT----- mirL 23 1298
-----CAGATCAGAAGGTGACTGT----- mirL 19 1291
-----GATCAGAAGGTGACTGTGGCT----- mirL 21 10
-----GATCAGAAGGTGACTGTGG----- mirL 19 4
-----GATCAGAAGGTGACTGTGGCTTT----- mirL 23 3
-----TCAGATCAGAAGGTGACTGTGGC----- mirL 23 3
-----ATCAGAAGGTGACTGTGGC----- mirL 19 3
-----GATCAGAAGGTGACTGTGGC----- mirL 20 2
-----GATCAGAAGGTGACTGTGGCTTTG----- mirL 24 2
-----TCAGAAGGTGACTGTGGCTTT----- mirL 21 2
-----TCAGATCAGAAGGTGACTGTGG----- mirL 22 2
-----ATCAGAAGGTGACTGTGGCTT----- mirL 21 1

```

```

-----TCAGATCAGAAGGTGACTGTGGCT----- mirL 24 1
-----TCAGAAGGTGACTGTGGC----- mirL 18 1
-----ATCAGAAGGTGACTGTGGCTTT----- mirL 22 1
-----TTGGGTGGATATTAATCAGC----- loop 21 1
-----TTGGGTGGATATTAATCAGC----- loop 20 1
-----CCACAGCACTGCCTGGTCAGA----- mirR 21 161
-----CCACAGCACTGCCTGGTCAG----- mirR 20 117
-----CCACAGCACTGCCTGGTCA----- mirR 19 103
-----CCACAGCACTGCCTGGTC----- mirR 18 71
-----CCACAGCACTGCCTGGTCAGAA----- mirR 22 47
-----CACAGCACTGCCTGGTCAGA----- mirR 20 17
-----CCACAGCACTGCCTGGTCAGAAA----- mirR 23 13
-----CACAGCACTGCCTGGTCAG----- mirR 19 12
-----CACAGCACTGCCTGGTCAGAA----- mirR 21 11
-----CACAGCACTGCCTGGTCAGAAA----- mirR 22 8
-----CACAGCACTGCCTGGTCA----- mirR 18 5
-----ACAGCACTGCCTGGTCAGA----- mirR 19 3
-----ACAGCACTGCCTGGTCAGAA----- mirR 20 2
-----AGCCACAGCACTGCCTGG----- mirR 18 1
-----CAGCACTGCCTGGTCAGA----- mirR 18 1
-----CACAGCACTGCCTGGTCAGAAAG----- mirR 23 1
-----CAGCCACAGCACTGCCTGG----- mirR 19 1
-----ACAGCACTGCCTGGTCAGAAA----- mirR 21 1
-----AGCCACAGCACTGCCTGGTCA----- mirR 21 1
-----CCACAGCACTGCCTGGTCAGAAAGCAAG----- mirR 30 1
-----AGAGCAAGTGTCTTAGCCTTTTACCTCATGACACC morR 35 1

```

>mmu-mir-3102

```

GTGAGTGGCCAGGGTGGGGCTGGGTGGTGCAGGCAGGAGAGCCATTGATCTATTGTGGGCTCTACTCCCTGCCCCAGCCAGAGCACCCCATTTGGCTACCCACAGGTACACAGCAGCCAGCGTCATTGATACAGCC speci
GTGAGTGGCCAGGGTGGGGCTGG----- morL
GTGAGTGGCCAGGGTGGGGCTG----- morL
GTGAGTGGCCAGGGTGGGGCTGG----- morL
GTGAGTGGCCAGGGTGGGGC----- morL
-----GGCCAGGGTGGGGCTGG----- morL
-----GGTGGTGCAGGCAGGAGAGC----- mirL
-----GGTGGTGCAGGCAGGAGAGCC----- mirL
-----GGTGGTGCAGGCAGGAGAGCCA----- mirL
-----GGTGGTGCAGGCAGGAGAG----- mirL
-----GGTGGTGCAGGCAGGAGAGCCAT----- mirL
-----GTGGTGCAGGCAGGAGAGCCA----- mirL
-----GTGGTGCAGGCAGGAGAGCCATTG----- mirL
-----GTGGTGCAGGCAGGAGAGCCAT----- mirL
-----GTGGTGCAGGCAGGAGAGCCATT----- mirL
-----GAGCACCCCATTTGGCTACCCAC----- mirR
-----GAGCACCCCATTTGGCTACCCACA----- mirR
-----GAGCACCCCATTTGGCTACCC----- mirR

```

```

-----GAGCACCCCATTGGCTACC----- mirR
-----GAGCACCCCATTGGCTACCCACAG----- mirR
-----GAGCACCCCATTGGCTACCCA----- mirR
-----GAGCACCCCATTGGCTAC----- mirR
-----AGAGCACCCCATTGGCTACCCAC----- mirR
-----AGAGCACCCCATTGGCTACCC----- mirR
-----CACCCCATTGGCTACCCACAGG----- mirR
-----AGAGCACCCCATTGGCTACCCACA----- mirR
-----CACCCCATTGGCTACCCACA----- mirR
-----CACCCCATTGGCTACCCAC----- mirR
-----CACCCCATTGGCTACCCACAG----- mirR
-----AGAGCACCCCATTGGCTACC----- mirR
-----AGAGCACCCCATTGGCTACCCA----- mirR
-----AGCACCCCATTGGCTACCCACA----- mirR
-----CAGAGCACCCCATTGGCTACCCAC----- mirR
-----AGAGCACCCCATTGGCTAC----- mirR
-----AGCACCCCATTGGCTACCCAC----- mirR
-----CACCCCATTGGCTACCCACAGGT----- mirR
-----AGAGCACCCCATTGGCTACCCACAG----- mirR
-----CAGAGCACCCCATTGGCTACCC----- mirR
-----CACCCCATTGGCTACCCA----- mirR
-----AGCACCCCATTGGCTACCC----- mirR
-----AGCACCCCATTGGCTACCCA----- mirR
-----GCACCCCATTGGCTACCCACA----- mirR
-----CAGAGCACCCCATTGGCTACCCACA----- mirR
-----AGCACCCCATTGGCTACC----- mirR
-----CAGAGCACCCCATTGGCTAC----- mirR
-----AGCACCCCATTGGCTACCCACAGG----- mirR
-----CACCCCATTGGCTACCCACAGGTA----- mirR
-----GCACCCCATTGGCTACCCAC----- mirR
-----CAGGTACACAGCAGCCAGCGTCATTGATACAGCC morR

```

>mmu-mir-15a

| Sequence                                                                              | species | len | reads |
|---------------------------------------------------------------------------------------|---------|-----|-------|
| TCAAAACCAACCCTTGGAGTAAAGTAGCAGCACATAATGGTTTGTGGATGTTGAAAAGGTGCAGGCCATACTGTGCTGCCTCAAA | morL    | 22  | 2     |
| --AAAACCAACCCTTGGAGTAAAG                                                              | morL    | 22  | 1     |
| TCAAAACCAACCCTTGGAGTAA                                                                | morL    | 24  | 1     |
| TCAAAACCAACCCTTGGAGTAAAG                                                              | morL    | 20  | 1     |
| -CAAACCAACCCTTGGAGTAA                                                                 | morL    | 21  | 1     |
| -AAAACCAACCCTTGGAGTAA                                                                 | morL    | 21  | 1     |
| -----TAGCAGCACATAATGGTTTGT-----                                                       | mirL    | 21  | 21155 |
| -----TAGCAGCACATAATGGTTTGT-----                                                       | mirL    | 20  | 3042  |
| -----TAGCAGCACATAATGGTTTGT-----                                                       | mirL    | 22  | 1927  |
| -----AGCAGCACATAATGGTTTGT-----                                                        | mirL    | 20  | 1349  |
| -----TAGCAGCACATAATGGTTTGT-----                                                       | mirL    | 23  | 1332  |



```

-----TAGCAGCACATAATGGTTT----- mirL 19 697
-----AGCAGCACATAATGGTTTG----- mirL 19 170
-----AGCAGCACATAATGGTTTGTGG----- mirL 22 167
-----AGCAGCACATAATGGTTTGTG----- mirL 21 95
-----AGCAGCACATAATGGTTTGTGGA----- mirL 23 35
-----GTAGCAGCACATAATGGTTTGT----- mirL 22 19
-----CAGCACATAATGGTTTGT----- mirL 18 13
-----GCAGCACATAATGGTTTGT----- mirL 19 10
-----AGTAGCAGCACATAATGGTTTGT----- mirL 23 5
-----GTAGCAGCACATAATGGTTTG----- mirL 21 4
-----CAGCACATAATGGTTTGTGG----- mirL 20 1
-----GCAGCACATAATGGTTTGTG----- mirL 20 1
-----GTAGCAGCACATAATGGTTTGTG----- mirL 23 1
-----GTAGCAGCACATAATGGTT----- mirL 19 1
-----AGTAGCAGCACATAATGGTTTGTG----- mirL 24 1
-----GCAGCACATAATGGTTTG----- mirL 18 1
-----CAGGCCATACTGTGCTGCCTCA-- mirR 22 252
-----CAGGCCATACTGTGCTGCCTC--- mirR 21 107
-----CAGGCCATACTGTGCTGCCT--- mirR 20 105
-----CAGGCCATACTGTGCTGCC----- mirR 19 45
-----CAGGCCATACTGTGCTGCCTCAA- mirR 23 31
-----CAGGCCATACTGTGCTGC----- mirR 18 19
-----GCAGGCCATACTGTGCTGCCTC--- mirR 22 11
-----AGGCCATACTGTGCTGCCTCAA- mirR 22 10
-----CAGGCCATACTGTGCTGCCTCAAA mirR 24 5
-----AGGCCATACTGTGCTGCCTCA-- mirR 21 5
-----AGGCCATACTGTGCTGCCTC--- mirR 20 3
-----GCAGGCCATACTGTGCTGCCTCA-- mirR 23 2
-----GCAGGCCATACTGTGCTGC----- mirR 19 1
-----GCAGGCCATACTGTGCTGCC----- mirR 20 1

```

>mmu-mir-26b

```

AGTTCAAGTAATTCAGGATAGGTTGTGGTGTGACCAGCCTGTTCTCCATTACTTGGCTCGGGGGCCGGTGCCT species len reads
--TTCAAGTAATTCAGGATAGGTT----- mirL 22 9322
--TTCAAGTAATTCAGGATAGGT----- mirL 21 7049
--TTCAAGTAATTCAGGATAGGTTG----- mirL 23 6989
--TTCAAGTAATTCAGGATAG----- mirL 19 2610
--TTCAAGTAATTCAGGATAGG----- mirL 20 1990
---TCAAGTAATTCAGGATAGGTTG----- mirL 22 679
---TCAAGTAATTCAGGATAGGTT----- mirL 21 608
---TCAAGTAATTCAGGATAGGT----- mirL 20 558
---TCAAGTAATTCAGGATAGG----- mirL 19 157
---TCAAGTAATTCAGGATAG----- mirL 18 113
---CAAGTAATTCAGGATAGGTTG----- mirL 21 7
---AAGTAATTCAGGATAGGT----- mirL 18 4
---CAAGTAATTCAGGATAGGTTGT----- mirL 22 3

```

```

-----CAAGTAATTCAGGATAGGT----- mirL 19 3
-----AAGTAATTCAGGATAGGTT----- mirL 19 3
AGTTCAAGTAATTCAGGATAG----- mirL 21 2
-GTTCAAGTAATTCAGGATAGGTTG----- mirL 24 1
-GTTCAAGTAATTCAGGATAG----- mirL 20 1
AGTTCAAGTAATTCAGGATAGGT----- mirL 23 1
-----AAGTAATTCAGGATAGGTTGTGG----- mirL 23 1
-----AAGTAATTCAGGATAGGTTG----- mirL 20 1
-----CAAGTAATTCAGGATAGGTT----- mirL 20 1
-GTTCAAGTAATTCAGGATAGGTT----- mirL 23 1
-----CCTGTTCTCCATTACTTGGCTC----- mirR 22 151
-----CCTGTTCTCCATTACTTGGC----- mirR 20 90
-----CCTGTTCTCCATTACTTGGCT----- mirR 21 58
-----CCTGTTCTCCATTACTTGGCTCG----- mirR 23 39
-----CCTGTTCTCCATTACTTGG----- mirR 19 22
-----CCTGTTCTCCATTACTTG----- mirR 18 17
-----CCTGTTCTCCATTACTTGGCTCGG----- mirR 24 15
-----GCCTGTTCTCCATTACTTGGCTC----- mirR 23 6
-----AGCCTGTTCTCCATTACTTGGC----- mirR 22 2
-----GCCTGTTCTCCATTACTTG----- mirR 19 2
-----GCCTGTTCTCCATTACTTGGC----- mirR 21 1
-----GCCTGTTCTCCATTACTTGG----- mirR 20 1
-----CTCGGGGGCCGGTGCCCT morR 18 1

```

>mmu-mir-497

```

CCACCCAGTCCTGCCCCGCCAGCAGCACACTGTGGTTTGTACGGCACTGTGGCCACGTCCAAACCACACTGTGGTGTTAGAGCGAGGGTATGGGAGGCA species len reads
CCACCCAGTCCTGCCCCGCC----- morL 23 1
--ACCCAGTCCTGCCCCG----- morL 18 1
-----CAGCAGCACACTGTGGTTTGT----- mirL 21 24061
-----CAGCAGCACACTGTGGTTTGTAC----- mirL 23 2089
-----CAGCAGCACACTGTGGTTTGT----- mirL 20 1186
-----CAGCAGCACACTGTGGTTTGT----- mirL 22 808
-----CAGCAGCACACTGTGGTT----- mirL 18 348
-----AGCAGCACACTGTGGTTTGT----- mirL 20 303
-----AGCAGCACACTGTGGTTTGTAC----- mirL 22 90
-----AGCAGCACACTGTGGTTTGT----- mirL 19 30
-----AGCAGCACACTGTGGTTTGT----- mirL 21 26
-----CCAGCAGCACACTGTGGTTTGT----- mirL 22 11
-----AGCAGCACACTGTGGTTT----- mirL 18 8
-----GCAGCACACTGTGGTTTGT----- mirL 19 7
-----CAGCACACTGTGGTTTGT----- mirL 18 5
-----CCCAGCAGCACACTGTGGTTTGT----- mirL 23 2
-----CCAGCAGCACACTGTGGTTTGT----- mirL 21 2
-----CCAGCAGCACACTGTGGTTTGT----- mirL 24 1
-----CAAACCACACTGTGGTGTTAG----- mirR 22 356
-----CCAAACCACACTGTGGTGTTAG----- mirR 22 271

```

```

-----TCCAAACCACACTGTGGTGTTA----- mirR 22 261
-----CCAAACCACACTGTGGTGTAGA----- mirR 23 135
-----CCAAACCACACTGTGGTGTTA----- mirR 21 110
-----TCCAAACCACACTGTGGTGTTAG----- mirR 23 101
-----CAAACCACACTGTGGTGTTAG----- mirR 21 63
-----TCCAAACCACACTGTGGTGTT----- mirR 21 32
-----CAAACCACACTGTGGTGTTA----- mirR 20 29
-----CCAAACCACACTGTGGTGTT----- mirR 20 22
-----TCCAAACCACACTGTGGTGT----- mirR 20 19
-----CAAACCACACTGTGGTGTT----- mirR 19 15
-----TCCAAACCACACTGTGGTG----- mirR 19 11
-----TCCAAACCACACTGTGGTGTTAGA----- mirR 24 10
-----CCAAACCACACTGTGGTGT----- mirR 19 10
-----CCAAACCACACTGTGGTG----- mirR 18 8
-----CAAACCACACTGTGGTGT----- mirR 18 6
-----TCCAAACCACACTGTGGT----- mirR 18 5
-----CAAACCACACTGTGGTGTTAGAG----- mirR 23 4
-----CAAACCACACTGTGGTGTTAGAGC----- mirR 24 3
-----AAACCACACTGTGGTGTT----- mirR 18 2
-----AACCACACTGTGGTGTTAGA----- mirR 20 1
-----AAACCACACTGTGGTGTTAGA----- mirR 21 1
-----CCAAACCACACTGTGGTGTTAGAG----- mirR 24 1
-----GCGAGGGTATGGGAGGCA morR 18 8

```

>mmu-mir-31

```

TCGGAAGTGGAGAGGAGGCAAGATGCTGGCATAGCTGTTGAACTGAGAACCTGCTATGCCAACATATTGCCATCTTTCTGTCTGACAGCAGCT species len reads
TCGGAAGTGGAGAGGAGG----- morL 18 1
-----AGGCAAGATGCTGGCATAGCT----- mirL 22 6816
-----AGGCAAGATGCTGGCATAGCT----- mirL 21 4502
-----AGGCAAGATGCTGGCATAGC----- mirL 20 4474
-----AGGCAAGATGCTGGCATAGCTGT----- mirL 23 3218
-----AGGCAAGATGCTGGCATAG----- mirL 19 1257
-----GGCAAGATGCTGGCATAGCTG----- mirL 21 8
-----GGCAAGATGCTGGCATAGCTGT----- mirL 22 3
-----GGCAAGATGCTGGCATAGCT----- mirL 20 2
-----GGCAAGATGCTGGCATAGC----- mirL 19 2
-----CAAGATGCTGGCATAGCTG----- mirL 19 1
-----GAGGCAAGATGCTGGCATA----- mirL 19 1
-----GAGGCAAGATGCTGGCATAG----- mirL 20 1
-----CAAGATGCTGGCATAGCT----- mirL 18 1
-----GAGGCAAGATGCTGGCATAGCTG----- mirL 23 1
-----GAGGCAAGATGCTGGCATAGCT----- mirL 22 1
-----GGAGGCAAGATGCTGGCATAGCTG----- mirL 24 1
-----GAGGCAAGATGCTGGCATAGCTGT----- mirL 24 1
-----GGCAAGATGCTGGCATAGCTGTT----- mirL 23 1
-----TGTGAACTGAGAACCTGC----- loop 19 1

```

```

-----TGCTATGCCAACATATTGCCATC----- mirR 23 4900
-----TGCTATGCCAACATATTGCC----- mirR 20 2028
-----TGCTATGCCAACATATTGCCAT----- mirR 22 932
-----TGCTATGCCAACATATTGCCA----- mirR 21 679
-----GCTATGCCAACATATTGCCATC----- mirR 22 482
-----TGCTATGCCAACATATTGC----- mirR 19 377
-----GCTATGCCAACATATTGCCAT----- mirR 21 155
-----TGCTATGCCAACATATTGCCATCT----- mirR 24 114
-----TATGCCAACATATTGCCATCT----- mirR 21 48
-----GCTATGCCAACATATTGCC----- mirR 19 47
-----GCTATGCCAACATATTGCCA----- mirR 20 25
-----GCTATGCCAACATATTGC----- mirR 18 16
-----TGCTATGCCAACATATTG----- mirR 18 10
-----CTATGCCAACATATTGCCATCT----- mirR 22 9
-----CTATGCCAACATATTGCCATC----- mirR 21 8
-----TATGCCAACATATTGCCATC----- mirR 20 8
-----GCTATGCCAACATATTGCCATCT----- mirR 23 5
-----TATGCCAACATATTGCCATCTT----- mirR 22 4
-----CTGCTATGCCAACATATTGCC----- mirR 21 3
-----CCTGCTATGCCAACATATTG----- mirR 20 1
-----CTGCTATGCCAACATATTGCCAT----- mirR 23 1
-----TCCTGTCTGACAGCAGCT morR 18 1

```

>mmu-mir-500

```

TCTCCTCTGCTCCCCCTCTCTAATCCTTGCTATCTGGGTGCTTAGTGCTATCTCAATGCAATGCACCTGGGCAAGGGTTCAGA species len reads
TCTCCTCTGCTCCCCCTC----- morL 18 4
-CTCCTCTGCTCCCCCTCTCT----- morL 20 1
--TCCTCTGCTCCCCCTCTCT----- morL 19 1
TCTCCTCTGCTCCCCCTCTC----- morL 20 1
TCTCCTCTGCTCCCCCTCTCTA----- morL 22 1
-----AATCCTTGCTATCTGGGTGC----- mirL 20 130
-----AATCCTTGCTATCTGGGTGCTTA----- mirL 23 126
-----AATCCTTGCTATCTGGGTGCTT----- mirL 22 120
-----AATCCTTGCTATCTGGGTGCTTAG----- mirL 24 58
-----AATCCTTGCTATCTGGGTGCT----- mirL 21 55
-----TAATCCTTGCTATCTGGGTGC----- mirL 21 11
-----TAATCCTTGCTATCTGGGTGCT----- mirL 22 8
-----TAATCCTTGCTATCTGGG----- mirL 18 2
-----TAATCCTTGCTATCTGGGTGCTT----- mirL 23 2
-----TAATCCTTGCTATCTGGGTGCTTA----- mirL 24 2
-----TCCTTGCTATCTGGGTGC----- mirL 18 1
-----AATGCACCTGGGCAAGGGTTC----- mirR 21 13381
-----AATGCACCTGGGCAAGGGTTC----- mirR 22 11896
-----AATGCACCTGGGCAAGGGTT----- mirR 20 2042
-----AATGCACCTGGGCAAGGGTTCAG----- mirR 23 1221
-----AATGCACCTGGGCAAGGGTTCAGA----- mirR 24 445

```

```

-----AATGCACCTGGGCAAGGGT----- mirR 19 349
-----AATGCACCTGGGCAAGGG----- mirR 18 98
-----CAATGCACCTGGGCAAGGGTTC--- mirR 22 12
-----CAATGCACCTGGGCAAGGGTTC--- mirR 23 5
-----ATGCACCTGGGCAAGGGTTC--- mirR 20 5
-----ATGCACCTGGGCAAGGGTTC--- mirR 21 5
-----GCACCTGGGCAAGGGTTC--- mirR 18 4
-----GCACCTGGGCAAGGGTTC--- mirR 19 3
-----ATGCACCTGGGCAAGGGTTCAG- mirR 22 3
-----CAATGCACCTGGGCAAGGGTTC--- mirR 21 2
-----TGCACCTGGGCAAGGGTTC--- mirR 19 2
-----CAATGCACCTGGGCAAGGGTTCAG- mirR 24 2
-----GCACCTGGGCAAGGGTTCAGA mirR 21 1
-----TGCACCTGGGCAAGGGTTC--- mirR 20 1
-----GCACCTGGGCAAGGGTTCAG- mirR 20 1
-----TGCACCTGGGCAAGGGTTCAG- mirR 21 1
-----ATGCACCTGGGCAAGGGTTCAGA mirR 23 1

```

>mmu-mir-301a

| CTCACTCCTGCTAACGGCTGCTCTGACTTTATTGCACTACTGTACTTTACAGCGAGCAGTGCAATAGTATTGTCAAAGCATCCGCGAGCAGGTTGCACACCTTTCC | species | len | reads |
|------------------------------------------------------------------------------------------------------------|---------|-----|-------|
| CTCACTCCTGCTAACGGCT                                                                                        | morL    | 19  | 1     |
| -TCACTCCTGCTAACGGCTGCT                                                                                     | morL    | 20  | 1     |
| -----GCTCTGACTTTATTGCACTACT                                                                                | mirL    | 21  | 569   |
| -----GCTCTGACTTTATTGCACTACT                                                                                | mirL    | 22  | 134   |
| -----GCTCTGACTTTATTGCACTA                                                                                  | mirL    | 20  | 97    |
| -----GCTCTGACTTTATTGCACT                                                                                   | mirL    | 19  | 21    |
| -----GCTCTGACTTTATTGCAC                                                                                    | mirL    | 18  | 12    |
| -----TCTGACTTTATTGCACTACT                                                                                  | mirL    | 20  | 2     |
| -----TGCTCTGACTTTATTGCA                                                                                    | mirL    | 18  | 1     |
| -----CTCTGACTTTATTGCACTACTG                                                                                | mirL    | 22  | 1     |
| -----CTCTGACTTTATTGCACTACT                                                                                 | mirL    | 21  | 1     |
| -----CTGACTTTATTGCACTACTG                                                                                  | mirL    | 20  | 1     |
| -----CAGTGCAATAGTATTGTCAAAGC                                                                               | mirR    | 23  | 12283 |
| -----CAGTGCAATAGTATTGTCAA                                                                                  | mirR    | 20  | 4152  |
| -----CAGTGCAATAGTATTGTCAA                                                                                  | mirR    | 21  | 2827  |
| -----CAGTGCAATAGTATTGTCA                                                                                   | mirR    | 19  | 2568  |
| -----CAGTGCAATAGTATTGTCAAAGCAT                                                                             | mirR    | 25  | 2404  |
| -----CAGTGCAATAGTATTGTCAAAG                                                                                | mirR    | 22  | 1954  |
| -----CAGTGCAATAGTATTGTCA                                                                                   | mirR    | 18  | 1704  |
| -----AGTGCAATAGTATTGTCAAAGC                                                                                | mirR    | 22  | 259   |
| -----AGTGCAATAGTATTGTCAAAGCAT                                                                              | mirR    | 24  | 51    |
| -----AGTGCAATAGTATTGTCAAAGCATC                                                                             | mirR    | 25  | 28    |
| -----AGTGCAATAGTATTGTCAA                                                                                   | mirR    | 19  | 23    |
| -----AGTGCAATAGTATTGTCAAAG                                                                                 | mirR    | 21  | 22    |
| -----AGTGCAATAGTATTGTCAA                                                                                   | mirR    | 20  | 18    |
| -----AGTGCAATAGTATTGTCAAAGCA                                                                               | mirR    | 23  | 6     |

```

-----TGCAATAGTATTGTCAAAGCATC----- mirR 23 5
-----TGCAATAGTATTGTCAAAGC----- mirR 20 4
-----GCAGTGCAATAGTATTGTCAAAGC----- mirR 24 3
-----TGCAATAGTATTGTCAAAGCATCC----- mirR 24 2
-----GTGCAATAGTATTGTCAAAG----- mirR 20 2
-----GTGCAATAGTATTGTCAA----- mirR 18 2
-----GTGCAATAGTATTGTCAAAGC----- mirR 21 1
-----AGCAGTGCAATAGTATTGTCAAAA----- mirR 23 1
-----GTGCAATAGTATTGTCAAAA----- mirR 19 1
-----GTGCAATAGTATTGTCAAAGCATC----- mirR 24 1
-----GAGCAGTGCAATAGTATTGTCAAAG----- mirR 25 1
-----TGCAATAGTATTGTCAAAGCAT----- mirR 22 1
-----GTGCAATAGTATTGTCAAAGCATCC----- mirR 25 1
-----GCAGTGCAATAGTATTGTCA----- mirR 19 1
-----GCAGTGCAATAGTATTGTCAAAA----- mirR 22 1
-----CCGCGAGCAGGTTGCACACCTTTCC morR 25 3
-----AGCATCCGCGAGCAGGTTGC----- morR 20 1

```

>mmu-mir-433

| sequence                                                                                                     | species | len | reads |
|--------------------------------------------------------------------------------------------------------------|---------|-----|-------|
| TACGGTGAGCCTGTCATTATTCAGAGAGGCTAGATCCTCTGTGTTGAGAAGGATCATGATGGGCTCCTCGGTGTTCTCCAGGTAGCGGCACCACCCATGAAGGCAGCC | mirL    | 22  | 737   |
| TACGGTGAGCCTGTCATTATTC                                                                                       | mirL    | 18  | 570   |
| TACGGTGAGCCTGTCATTAT                                                                                         | mirL    | 20  | 453   |
| TACGGTGAGCCTGTCATTAT                                                                                         | mirL    | 21  | 310   |
| TACGGTGAGCCTGTCATTA                                                                                          | mirL    | 19  | 108   |
| -ACGGTGAGCCTGTCATTAT                                                                                         | mirL    | 19  | 36    |
| -ACGGTGAGCCTGTCATTATTC                                                                                       | mirL    | 21  | 35    |
| -ACGGTGAGCCTGTCATTAT                                                                                         | mirL    | 20  | 15    |
| -ACGGTGAGCCTGTCATTATCA                                                                                       | mirL    | 22  | 8     |
| -ACGGTGAGCCTGTCATTA                                                                                          | mirL    | 18  | 8     |
| --CGGTGAGCCTGTCATTAT                                                                                         | mirL    | 18  | 1     |
| -----ATCATGATGGGCTCCTCGGTGT-----                                                                             | mirR    | 22  | 12205 |
| -----ATCATGATGGGCTCCTCGGTGTT-----                                                                            | mirR    | 23  | 2886  |
| -----ATCATGATGGGCTCCTCGGTGTT-----                                                                            | mirR    | 24  | 2544  |
| -----ATCATGATGGGCTCCTCGGT-----                                                                               | mirR    | 20  | 2535  |
| -----ATCATGATGGGCTCCTCGGTG-----                                                                              | mirR    | 21  | 2381  |
| -----ATCATGATGGGCTCCTCGG-----                                                                                | mirR    | 19  | 2251  |
| -----ATCATGATGGGCTCCTCG-----                                                                                 | mirR    | 18  | 1189  |
| -----TCATGATGGGCTCCTCGGTGT-----                                                                              | mirR    | 21  | 251   |
| -----GATCATGATGGGCTCCTCGGTGT-----                                                                            | mirR    | 23  | 88    |
| -----TCATGATGGGCTCCTCGGTGTT-----                                                                             | mirR    | 22  | 82    |
| -----TCATGATGGGCTCCTCGGTGTT-----                                                                             | mirR    | 23  | 64    |
| -----TCATGATGGGCTCCTCGGTG-----                                                                               | mirR    | 20  | 63    |
| -----CATGATGGGCTCCTCGGTGT-----                                                                               | mirR    | 20  | 51    |
| -----TCATGATGGGCTCCTCGGT-----                                                                                | mirR    | 19  | 45    |
| -----GATCATGATGGGCTCCTCGG-----                                                                               | mirR    | 20  | 29    |

```

-----TCATGATGGGCTCCTCGG----- mirR 18 26
-----CATGATGGGCTCCTCGGTGTT----- mirR 21 25
-----GATCATGATGGGCTCCTCGGT----- mirR 21 23
-----GATCATGATGGGCTCCTC----- mirR 18 22
-----GATCATGATGGGCTCCTCGGTG----- mirR 22 20
-----GATCATGATGGGCTCCTCGGTGTT----- mirR 25 17
-----CATGATGGGCTCCTCGGTG----- mirR 19 14
-----GATCATGATGGGCTCCTCG----- mirR 19 14
-----CATGATGGGCTCCTCGGT----- mirR 18 8
-----CATGATGGGCTCCTCGGTGTT----- mirR 22 5
-----ATGATGGGCTCCTCGGTGTT----- mirR 19 5
-----TCATGATGGGCTCCTCGGTGTTCT----- mirR 24 3
-----ATGATGGGCTCCTCGGTG----- mirR 18 2
-----ATGATGGGCTCCTCGGTGTTCTCTCC----- mirR 24 1
-----CATGATGGGCTCCTCGGTGTTCTCTCC----- mirR 25 1
-----GGATCATGATGGGCTCCTCGGTG----- mirR 23 1
-----ATGATGGGCTCCTCGGTGTT----- mirR 21 1
-----ATGATGGGCTCCTCGGTGTT----- mirR 20 1
-----TCTCCAGGTAGCGGCACCACACC----- morR 23 1
-----TCCAGGTAGCGGCACCACCCATGAAGGCAGCC morR 33 1

```

>mmu-mir-33

```

CTCCTGGCGGGCAGCTGTGGTGCATTGTAGTTGCATTGCATGTTCTGGCAATACCTGTGCAATGTTTCCACAGTGCATCACGG species len reads
CTCCTGGCGGGCAGCTGTGG----- morL 20 1
-----GTGCATTGTAGTTGCATTGC----- mirL 20 12479
-----GTGCATTGTAGTTGCATTG----- mirL 19 5590
-----GTGCATTGTAGTTGCATTGCA----- mirL 21 2041
-----GTGCATTGTAGTTGCATT----- mirL 18 892
-----GTGCATTGTAGTTGCATTGCAT----- mirL 22 305
-----GCATTGTAGTTGCATTGC----- mirL 18 8
-----TGCATTGTAGTTGCATTGC----- mirL 19 3
-----GGTGCATTGTAGTTGCATTGC----- mirL 21 2
-----GGTGCATTGTAGTTGCATTG----- mirL 20 2
-----TGCATTGTAGTTGCATTG----- mirL 18 1
-----CATTGTAGTTGCATTGCATG----- mirL 20 1
-----TGTCTGGCAATACCTGTGC----- loop 20 3
-----GTTCTGGCAATACCTGTGC----- loop 19 1
-----CAATGTTTCCACAGTGCATCA----- mirR 21 4821
-----CAATGTTTCCACAGTGCAT----- mirR 19 1164
-----CAATGTTTCCACAGTGCATC----- mirR 20 846
-----CAATGTTTCCACAGTGCATCAC----- mirR 22 567
-----AATGTTTCCACAGTGCATCAC----- mirR 21 36
-----CAATGTTTCCACAGTGCA----- mirR 18 35
-----CAATGTTTCCACAGTGCATCACG----- mirR 23 28
-----AATGTTTCCACAGTGCATC----- mirR 19 13
-----AATGTTTCCACAGTGCATCACG----- mirR 22 6

```

```

-----AATGTTTCCACAGTGCATCA--- mirR 20 6
-----CAATGTTTCCACAGTGCATCACGG mirR 24 6
-----AATGTTTCCACAGTGCAT----- mirR 18 6
-----GCAATGTTTCCACAGTGCATCA--- mirR 22 1
-----TGCAATGTTTCCACAGTGCAT----- mirR 21 1
-----GCAATGTTTCCACAGTGCA----- mirR 19 1

```

>mmu-mir-582

| Species | len | reads |
|---------|-----|-------|
| morL    | 20  | 1     |
| mirL    | 22  | 6075  |
| mirL    | 22  | 6035  |
| mirL    | 21  | 4348  |
| mirL    | 20  | 1777  |
| mirL    | 21  | 1625  |
| mirL    | 20  | 1139  |
| mirL    | 21  | 1075  |
| mirL    | 19  | 625   |
| mirL    | 23  | 443   |
| mirL    | 19  | 289   |
| mirL    | 19  | 207   |
| mirL    | 20  | 194   |
| mirL    | 18  | 179   |
| mirL    | 18  | 92    |
| mirL    | 22  | 49    |
| mirL    | 21  | 46    |
| mirL    | 23  | 18    |
| mirL    | 23  | 9     |
| mirL    | 20  | 9     |
| mirL    | 22  | 8     |
| mirL    | 18  | 6     |
| mirL    | 20  | 4     |
| mirL    | 19  | 2     |
| mirL    | 18  | 2     |
| mirL    | 19  | 2     |
| mirL    | 22  | 1     |
| mirL    | 19  | 1     |
| mirL    | 18  | 1     |
| mirR    | 22  | 1771  |
| mirR    | 21  | 472   |
| mirR    | 23  | 361   |
| mirR    | 20  | 341   |
| mirR    | 22  | 293   |
| mirR    | 21  | 218   |
| mirR    | 19  | 81    |
| mirR    | 20  | 71    |



```

-----TAACCTGTTGAACAACCTGA----- mirR 19 69
-----AACCTGTTGAACAACCTGAACCCA-- mirR 23 64
-----ACCTGTTGAACAACCTGAACCC-- mirR 21 58
-----AACCTGTTGAACAACCTGA----- mirR 18 50
-----AACCTGTTGAACAACCTGAACCCAA- mirR 24 34
-----CCTGTTGAACAACCTGAACCCA-- mirR 21 30
-----ACCTGTTGAACAACCTGAACC-- mirR 20 11
-----ACCTGTTGAACAACCTGAACCCA-- mirR 22 10
-----TAACCTGTTGAACAACCTGAACCCA-- mirR 24 8
-----ACCTGTTGAACAACCTGAAC-- mirR 19 8
-----TAACCTGTTGAACAACCTG----- mirR 18 8
-----GTAACCTGTTGAACAACCTGAAC-- mirR 22 7
-----CCTGTTGAACAACCTGAACCC-- mirR 20 6
-----CCTGTTGAACAACCTGAACCCAAA mirR 23 3
-----ACCTGTTGAACAACCTGAA----- mirR 18 3
-----ACCTGTTGAACAACCTGAACCCAA- mirR 23 2
-----GTAACCTGTTGAACAACCTGA----- mirR 20 1
-----CCTGTTGAACAACCTGAAC-- mirR 18 1
-----GTAACCTGTTGAACAACCTGAACC-- mirR 23 1
-----CCTGTTGAACAACCTGAACCCAA- mirR 22 1
-----GTAACCTGTTGAACAACCTG----- mirR 19 1
-----GTAACCTGTTGAACAACCTGAA----- mirR 21 1

```

>mmu-mir-326

```

AGCCTCATCTGTCTGTTGGGCTGGGGGCAGGGCCTTTGTGAAGGCGGGTTATGCTCAGATCGCCTCTGGGCCCTTCCTCCAGTCCCAGGCAGATTTACTTCGAGGC species len reads
AGCCTCATCTGTCTGTTGGGC----- morL 21 1
-----GGGGGCAGGGCCTTTGTGAAG----- mirL 21 3
-----GGGGGCAGGGCCTTTGTGAAGGCGGGTTATGC----- mirL 32 1
-----GGGGGCAGGGCCTTTGTG----- mirL 18 1
-----TGGGGGCAGGGCCTTTGTGAAGGCGGGTTATGC----- mirL 33 1
-----CCTCTGGGCCCTTCCTCCAGT----- mirR 21 10068
-----CCTCTGGGCCCTTCCTCCAGTC----- mirR 22 5370
-----CCTCTGGGCCCTTCCTCCAG----- mirR 20 3661
-----CCTCTGGGCCCTTCCTCC----- mirR 18 3457
-----CCTCTGGGCCCTTCCTCCA----- mirR 19 2631
-----CCTCTGGGCCCTTCCTCCAGTCC----- mirR 23 2306
-----CCTCTGGGCCCTTCCTCCAGTCCC----- mirR 24 191
-----CTCTGGGCCCTTCCTCCAGT----- mirR 20 22
-----CTCTGGGCCCTTCCTCCAGTCC----- mirR 22 19
-----CTCTGGGCCCTTCCTCCAGTC----- mirR 21 17
-----TCTGGGCCCTTCCTCCAGT----- mirR 19 13
-----TCTGGGCCCTTCCTCCAGTC----- mirR 20 9
-----CTCTGGGCCCTTCCTCCA----- mirR 18 6
-----TCTGGGCCCTTCCTCCAGTCC----- mirR 21 5
-----CTCTGGGCCCTTCCTCCAG----- mirR 19 5
-----TCTGGGCCCTTCCTCCAG----- mirR 18 3

```

```

-----GCCTCTGGGCCCTTCCTCCAGTC----- mirR 23 2
-----CTGGGCCCTTCCTCCAGTCC----- mirR 20 2
-----TCGCCTCTGGGCCCTTCCTCCA----- mirR 22 1
-----GCCTCTGGGCCCTTCCTCCA----- mirR 20 1
-----CTCTGGGCCCTTCCTCCAGTCCC----- mirR 23 1
-----TCGCCTCTGGGCCCTTCCT----- mirR 19 1
-----CTGGGCCCTTCCTCCAGTCCC----- mirR 21 1
-----GCCTCTGGGCCCTTCCTCCAGT----- mirR 22 1
-----GCCTCTGGGCCCTTCCTCCAG----- mirR 21 1
-----TCTGGGCCCTTCCTCCAGTCCC----- mirR 22 1
-----TCCCAGGCAGATTTACTT----- morR 19 1
-----TCCCAGGCAGATTTACTTCGAGGC morR 25 1
-----GAGGCAGATTTACTTCGA--- morR 18 1

```

>mmu-mir-345

```

CGACACCCAAGTCCAGGCCCTGCTGACCCCTAGTCCAGTGCTTGTGGTGGCTACTGGGCCCTGAACTAGGGGTCTGGAGACCTGGGTTTGATCTCCAC species len reads
CGACACCCAAGTCCAGGCC----- morL 19 1
-GACACCCAAGTCCAGGCC----- morL 19 1
-----GCTGACCCCTAGTCCAGTGCT----- mirL 21 7876
-----TGCTGACCCCTAGTCCAGTGC----- mirL 21 7873
-----GCTGACCCCTAGTCCAGTGC----- mirL 20 4285
-----TGCTGACCCCTAGTCCAGTGCT----- mirL 22 1919
-----TGCTGACCCCTAGTCCAGTG----- mirL 20 1211
-----GCTGACCCCTAGTCCAGTGCTT----- mirL 22 1168
-----GCTGACCCCTAGTCCAGTG----- mirL 19 761
-----TGCTGACCCCTAGTCCAGT----- mirL 19 606
-----TGCTGACCCCTAGTCCAG----- mirL 18 422
-----GCTGACCCCTAGTCCAGTGCTT----- mirL 23 367
-----TGACCCCTAGTCCAGTGCTTGT----- mirL 22 133
-----TGACCCCTAGTCCAGTGC----- mirL 18 25
-----TGACCCCTAGTCCAGTGCTTGT----- mirL 23 18
-----TGACCCCTAGTCCAGTGCTT----- mirL 20 9
-----TGACCCCTAGTCCAGTGCT----- mirL 19 8
-----CTGACCCCTAGTCCAGTGCT----- mirL 20 6
-----GACCCCTAGTCCAGTGCTTGT----- mirL 21 4
-----GACCCCTAGTCCAGTGCTT----- mirL 19 3
-----GACCCCTAGTCCAGTGCT----- mirL 18 3
-----GACCCCTAGTCCAGTGCTTGTGG----- mirL 23 1
-----CTGACCCCTAGTCCAGTGCTTGT----- mirL 23 1
-----CTGACCCCTAGTCCAGTGC----- mirL 19 1
-----CTGCTGACCCCTAGTCCAGTGCTT----- mirL 24 1
-----CTGCTGACCCCTAGTCCAGTGC----- mirL 22 1
-----TTGTGGTGGCTACTGGGC----- loop 18 4
-----CCTGAACTAGGGGTCTGGAGA----- mirR 21 76
-----CCTGAACTAGGGGTCTGGAGAC----- mirR 22 56
-----CCTGAACTAGGGGTCTGGAG----- mirR 20 30

```

```
-----CCCTGAACTAGGGGTCTGGAG----- mirR 21 24
-----CCCTGAACTAGGGGTCTGGAGAC----- mirR 23 21
-----CCCTGAACTAGGGGTCTGGAGA----- mirR 22 20
-----CCTGAACTAGGGGTCTGG----- mirR 18 11
-----CCTGAACTAGGGGTCTGGAGACC----- mirR 23 10
-----CCTGAACTAGGGGTCTGGGA----- mirR 19 9
-----CCCTGAACTAGGGGTCTGGGA----- mirR 20 5
-----CCCTGAACTAGGGGTCTGG----- mirR 19 5
-----CCCTGAACTAGGGGTCTG----- mirR 18 3
-----CCTGAACTAGGGGTCTGGAGACCT----- mirR 24 2
-----CCCTGAACTAGGGGTCTGGAGACC----- mirR 24 1
-----GCCCTGAACTAGGGGTCT----- mirR 18 1
-----CCTGGGTTTGATCTCCAC morR 18 1
```

>mmu-mir-19b-2

```
TTCAGCGTATATGTGAATATATGGCTGTGCAAATCCATGCAAAACTGATT species len reads
--CAGCGTATATGTGAATATAT----- loop 20 2
---AGCGTATATGTGAATATAT----- loop 19 1
----CGTATATGTGAATATATG----- loop 18 1
-TCAGCGTATATGTGAATATATG----- loop 22 1
---GCGTATATGTGAATATAT----- loop 18 1
-TCAGCGTATATGTGAATATAT----- loop 21 1
TTCAGCGTATATGTGAATATAT----- loop 22 1
-----TGTGCAAATCCATGCAAAACTGA-- mirR 23 10065
-----TGTGCAAATCCATGCAAAACTG--- mirR 22 9232
-----TGTGCAAATCCATGCAAAACT--- mirR 21 2909
-----TGTGCAAATCCATGCAAAAC---- mirR 20 1759
-----TGTGCAAATCCATGCAAAA----- mirR 19 1005
-----GTGCAAATCCATGCAAAACTG--- mirR 21 412
-----GTGCAAATCCATGCAAAACTGA-- mirR 22 409
-----TGTGCAAATCCATGCAAAA----- mirR 18 216
-----GTGCAAATCCATGCAAAACT--- mirR 20 165
-----GTGCAAATCCATGCAAAAC---- mirR 19 83
-----GTGCAAATCCATGCAAAA----- mirR 18 52
-----TGTGCAAATCCATGCAAAACTGATT mirR 25 35
-----CTGTGCAAATCCATGCAAAACT--- mirR 22 13
-----CTGTGCAAATCCATGCAAAACTGA-- mirR 24 7
-----TGCAAATCCATGCAAAACTG--- mirR 20 4
-----CTGTGCAAATCCATGCAAAACTG--- mirR 23 3
-----GTGCAAATCCATGCAAAACTGAT- mirR 23 3
-----CTGTGCAAATCCATGCAAAAC---- mirR 21 2
-----GTGCAAATCCATGCAAAACTGATT mirR 24 2
-----CTGTGCAAATCCATGCAAAA----- mirR 20 1
-----TGCAAATCCATGCAAAACTGA-- mirR 21 1
```

>mmu-mir-365-1

|                                                                                                        | species | len | reads |
|--------------------------------------------------------------------------------------------------------|---------|-----|-------|
| TGATTGGTTACCGCAGGGAAAAATGAGGGACTTTTGGGGGCAGATGTGTTTCCATTCCGCTATCATAATGCCCTAAAAATCCTTATTGCTCTTGCAATATCC | morL    | 22  | 2     |
| TGATTGGTTACCGCAGGGAAAA-----                                                                            | morL    | 21  | 1     |
| TGATTGGTTACCGCAGGGAAAA-----                                                                            | mirL    | 22  | 2     |
| -----AGGGACTTTTGGGGGCAGATGT-----                                                                       | mirL    | 25  | 1     |
| -----AGGGACTTTTGGGGGCAGATGTGTT-----                                                                    | mirL    | 19  | 1     |
| -----GAGGGACTTTTGGGGGCAG-----                                                                          | mirL    | 24  | 1     |
| -----AGGGACTTTTGGGGGCAGATGT-----                                                                       | mirL    | 23  | 1     |
| -----AGGGACTTTTGGGGGCAGATGTG-----                                                                      | mirL    | 20  | 1     |
| -----AGGGACTTTTGGGGGCAGAT-----                                                                         | mirL    | 20  | 1     |
| -----GGGACTTTTGGGGGCAGATG-----                                                                         | mirL    | 20  | 1     |
| -----TAATGCCCTAAAAATCCTTAT-----                                                                        | mirR    | 22  | 19436 |
| -----AATGCCCTAAAAATCCTTAT-----                                                                         | mirR    | 21  | 2465  |
| -----TAATGCCCTAAAAATCCTTA-----                                                                         | mirR    | 21  | 1781  |
| -----TAATGCCCTAAAAATCC-----                                                                            | mirR    | 18  | 1428  |
| -----TAATGCCCTAAAAATCCTT-----                                                                          | mirR    | 20  | 401   |
| -----AATGCCCTAAAAATCCTTA-----                                                                          | mirR    | 20  | 229   |
| -----TAATGCCCTAAAAATCCT-----                                                                           | mirR    | 19  | 191   |
| -----TAATGCCCTAAAAATCCTTATT-----                                                                       | mirR    | 23  | 131   |
| -----AATGCCCTAAAAATCCTTATT-----                                                                        | mirR    | 22  | 97    |
| -----AATGCCCTAAAAATCCTT-----                                                                           | mirR    | 19  | 62    |
| -----AATGCCCTAAAAATCCT-----                                                                            | mirR    | 18  | 15    |
| -----TAATGCCCTAAAAATCCTTATTGC-----                                                                     | mirR    | 25  | 14    |
| -----ATGCCCTAAAAATCCTTAT-----                                                                          | mirR    | 20  | 9     |
| -----AATGCCCTAAAAATCCTTATTG-----                                                                       | mirR    | 23  | 4     |
| -----TGCCCTAAAAATCCTTAT-----                                                                           | mirR    | 19  | 3     |
| -----ATAATGCCCTAAAAATCCTTAT-----                                                                       | mirR    | 23  | 3     |
| -----ATAATGCCCTAAAAATCC-----                                                                           | mirR    | 19  | 2     |
| -----CATAATGCCCTAAAAATCCT-----                                                                         | mirR    | 21  | 2     |
| -----ATAATGCCCTAAAAATCCTT-----                                                                         | mirR    | 21  | 1     |
| -----CATAATGCCCTAAAAATCCTT-----                                                                        | mirR    | 22  | 1     |
| -----AATGCCCTAAAAATCCTTATTGCT-----                                                                     | mirR    | 25  | 1     |
| -----TATTGCTCTTGCAATATCC-----                                                                          | morR    | 20  | 9     |

>mmu-mir-365-2

|                                                                              | species | len | reads |
|------------------------------------------------------------------------------|---------|-----|-------|
| AGCAAGAAAAATGAGGGACTTTGAGGGGCAGCTGTGTTTCTGACTCAGTCATAATGCCCTAAAAATCCTTATTGTT | mirL    | 18  | 2     |
| AGCAAGAAAAATGAGGGA-----                                                      | mirR    | 22  | 19436 |
| -----TAATGCCCTAAAAATCCTTAT-----                                              | mirR    | 21  | 2465  |
| -----AATGCCCTAAAAATCCTTAT-----                                               | mirR    | 21  | 1781  |
| -----TAATGCCCTAAAAATCCTTA-----                                               | mirR    | 18  | 1428  |
| -----TAATGCCCTAAAAATCC-----                                                  | mirR    | 20  | 401   |
| -----AATGCCCTAAAAATCCTT-----                                                 | mirR    | 20  | 229   |
| -----TAATGCCCTAAAAATCCTTA-----                                               | mirR    | 19  | 191   |
| -----TAATGCCCTAAAAATCCTTATT-----                                             | mirR    | 23  | 131   |
| -----AATGCCCTAAAAATCCTTATT-----                                              | mirR    | 22  | 98    |
| -----AATGCCCTAAAAATCCTT-----                                                 | mirR    | 19  | 62    |

```

-----AATGCCCTAAAAATCCT----- mirR 18 15
-----ATGCCCTAAAAATCCTTAT---- mirR 20 9
-----TAATGCCCTAAAAATCCTTATTG-- mirR 24 7
-----AATGCCCTAAAAATCCTTATTG-- mirR 23 4
-----ATAATGCCCTAAAAATCCTTAT--- mirR 23 3
-----TGCCCTAAAAATCCTTAT---- mirR 19 3
-----CATAATGCCCTAAAAATCCT----- mirR 21 2
-----ATAATGCCCTAAAAATCC----- mirR 19 2
-----CATAATGCCCTAAAAATCCTT---- mirR 22 1
-----AATGCCCTAAAAATCCTTATTGTT mirR 25 1
-----ATAATGCCCTAAAAATCCTT---- mirR 21 1

```

>mmu-mir-20a

| Sequence                                                                                       | species | len | reads |
|------------------------------------------------------------------------------------------------|---------|-----|-------|
| TGTGACAGCTTCTGTAGCACTAAAGTGCTTATAGTGCAGGTAGTGTGTAGCCATCTACTGCATTACGAGCACTTAAAGTACTGCCAGCTGTAGA | morL    | 20  | 2     |
| TGTGACAGCTTCTGTAGCAC-----TAAAGTGCTTATAGTGCAGGTAG-----                                          | mirL    | 23  | 8325  |
| -----TAAAGTGCTTATAGTGCAGGTA-----                                                               | mirL    | 22  | 8168  |
| -----TAAAGTGCTTATAGTGCAGGT-----                                                                | mirL    | 21  | 3474  |
| -----TAAAGTGCTTATAGTGCAGGTAGT-----                                                             | mirL    | 24  | 1955  |
| -----AAAGTGCTTATAGTGCAGGTAG-----                                                               | mirL    | 22  | 1802  |
| -----TAAAGTGCTTATAGTGCAGG-----                                                                 | mirL    | 20  | 1155  |
| -----AAAGTGCTTATAGTGCAGGTAGT-----                                                              | mirL    | 23  | 451   |
| -----AAAGTGCTTATAGTGCAGGT-----                                                                 | mirL    | 20  | 389   |
| -----AAAGTGCTTATAGTGCAGGTA-----                                                                | mirL    | 21  | 205   |
| -----AAAGTGCTTATAGTGCAG-----                                                                   | mirL    | 18  | 75    |
| -----AAGTGCTTATAGTGCAGGTAG-----                                                                | mirL    | 21  | 4     |
| -----AGTGCTTATAGTGCAGGTAG-----                                                                 | mirL    | 20  | 3     |
| -----CTAAAGTGCTTATAGTGCAG-----                                                                 | mirL    | 20  | 2     |
| -----CTAAAGTGCTTATAGTGCAGGT-----                                                               | mirL    | 22  | 2     |
| -----AAGTGCTTATAGTGCAGGT-----                                                                  | mirL    | 19  | 2     |
| -----CTAAAGTGCTTATAGTGCAGGTA-----                                                              | mirL    | 23  | 1     |
| -----AGTGCTTATAGTGCAGGT-----                                                                   | mirL    | 18  | 1     |
| -----AAGTGCTTATAGTGCAGG-----                                                                   | mirL    | 18  | 1     |
| -----CTAAAGTGCTTATAGTGCAGGTAGT-----                                                            | mirL    | 25  | 1     |
| -----ACTAAAGTGCTTATAGTGCAGG-----                                                               | mirL    | 22  | 1     |
| -----CTAAAGTGCTTATAGTGCAGGTAG-----                                                             | mirL    | 24  | 1     |
| -----AAGTGCTTATAGTGCAGGTAGT-----                                                               | mirL    | 22  | 1     |
| -----TAGTGTGTAGCCATCTACT-----                                                                  | loop    | 19  | 1     |
| -----AGTGTGTAGCCATCTACT-----                                                                   | loop    | 18  | 1     |
| -----TAGTGTGTAGCCATCTAC-----                                                                   | loop    | 18  | 1     |
| -----ACTGCATTACGAGCACTTA-----                                                                  | mirR    | 19  | 60    |
| -----ACTGCATTACGAGCACTTAA-----                                                                 | mirR    | 20  | 28    |
| -----ACTGCATTACGAGCACTT-----                                                                   | mirR    | 18  | 10    |
| -----ACTGCATTACGAGCACTTAAAGT-----                                                              | mirR    | 23  | 8     |
| -----ACTGCATTACGAGCACTTAAA-----                                                                | mirR    | 21  | 4     |
| -----CTGCATTACGAGCACTTAAA-----                                                                 | mirR    | 20  | 2     |

```

-----TACTGCATTACGAGCACTT----- mirR 19 1
-----ACTGCATTACGAGCACTTAAAGTAC----- mirR 25 1
-----TACTGCATTACGAGCACTTA----- mirR 20 1
-----ACTGCATTACGAGCACTTAAAG----- mirR 22 1
-----TCTACTGCATTACGAGCACTTA----- mirR 22 1
-----CTACTGCATTACGAGCACTTAA----- mirR 22 1
-----AAGTACTGCCAGCTGTAGA morR 19 2

```

>mmu-mir-186

```

AACATTTAATTGCTTACAACCTTCCAAAGAATTCTCCTTTTGGGCTTTCTCATTATTATTTAAGCCCTAAGGTGAATTTTTGGGAAGT species len reads
-----TTAATTGCTTACAACCTTCC----- morL 20 2
AACATTTAATTGCTTACAACCT----- morL 21 1
-----AATTGCTTACAACCTTCC----- morL 18 1
-----CAAAGAATTCTCCTTTTGGGCT----- mirL 22 11741
-----CAAAGAATTCTCCTTTTGGGC----- mirL 21 4015
-----CAAAGAATTCTCCTTTTGGGCTT----- mirL 23 3365
-----CAAAGAATTCTCCTTTTGG----- mirL 19 3294
-----CAAAGAATTCTCCTTTTGGG----- mirL 20 879
-----CCAAAGAATTCTCCTTTTGGGC----- mirL 22 713
-----CCAAAGAATTCTCCTTTTGGGCT----- mirL 23 233
-----CCAAAGAATTCTCCTTTTGG----- mirL 20 106
-----AAAGAATTCTCCTTTTGGGCTT----- mirL 22 88
-----AAAGAATTCTCCTTTTGGGC----- mirL 20 70
-----CCAAAGAATTCTCCTTTTGG----- mirL 19 67
-----CCAAAGAATTCTCCTTTTGGGCTT----- mirL 24 53
-----AAAGAATTCTCCTTTTGGGCT----- mirL 21 47
-----AAAGAATTCTCCTTTTGGGCTTTC----- mirL 24 45
-----AAAGAATTCTCCTTTTGGGCTTT----- mirL 23 28
-----AAGAATTCTCCTTTTGGGCT----- mirL 20 3
-----AAGAATTCTCCTTTTGGGCTTTC----- mirL 23 2
-----AAGAATTCTCCTTTTGGGC----- mirL 19 1
-----TCCAAAGAATTCTCCTTTTGGGC----- mirL 23 1
-----AAGAATTCTCCTTTTGGGCTT----- mirL 21 1
-----TCCAAAGAATTCTCCTTTTGGGCT----- mirL 24 1
-----AGAATTCTCCTTTTGGGCTT----- mirL 20 1
-----GCCCTAAGGTGAATTTTTGGGA----- mirR 23 160
-----GCCCTAAGGTGAATTTTTGGG----- mirR 22 132
-----GCCCTAAGGTGAATTTTTGG----- mirR 21 113
-----CCCTAAGGTGAATTTTTGGGA----- mirR 22 91
-----GCCCTAAGGTGAATTTTTG----- mirR 20 62
-----GCCCTAAGGTGAATTTTT----- mirR 19 62
-----CCCTAAGGTGAATTTTTGGGAA----- mirR 23 56
-----CCCTAAGGTGAATTTTTGGG----- mirR 21 50
-----GCCCTAAGGTGAATTTTT----- mirR 18 46
-----GCCCTAAGGTGAATTTTTGGGAA----- mirR 24 44
-----CCCTAAGGTGAATTTTTGG----- mirR 20 33

```

```

-----CCCTAAGGTGAATTTTTGGGAAG- mirR 24 20
-----CCCTAAGGTGAATTTTTG----- mirR 19 17
-----CCCTAAGGTGAATTTTT----- mirR 18 15
-----CCTAAGGTGAATTTTTGGGAAG- mirR 23 14
-----CCTAAGGTGAATTTTTGGGAA-- mirR 22 13
-----CCTAAGGTGAATTTTTGGG--- mirR 20 7
-----CCTAAGGTGAATTTTTGGGA--- mirR 21 6
-----CCTAAGGTGAATTTTTG----- mirR 19 4
-----CCTAAGGTGAATTTTTGGGAAGT mirR 24 3
-----CCTAAGGTGAATTTTTG----- mirR 18 2
-----AGCCCTAAGGTGAATTTTTGGG--- mirR 23 2
-----AGCCCTAAGGTGAATTTTTG----- mirR 22 1

```

>mmu-mir-185

| Species | len | reads |
|---------|-----|-------|
| morL    | 19  | 1     |
| morL    | 19  | 1     |
| mirL    | 22  | 13648 |
| mirL    | 23  | 5067  |
| mirL    | 19  | 2828  |
| mirL    | 21  | 2062  |
| mirL    | 18  | 1099  |
| mirL    | 21  | 475   |
| mirL    | 22  | 206   |
| mirL    | 20  | 86    |
| mirL    | 19  | 51    |
| mirL    | 18  | 45    |
| mirL    | 23  | 5     |
| mirL    | 25  | 4     |
| mirL    | 24  | 3     |
| mirL    | 20  | 3     |
| mirL    | 20  | 3     |
| mirL    | 20  | 2     |
| mirL    | 19  | 2     |
| mirL    | 25  | 2     |
| mirL    | 23  | 1     |
| mirL    | 20  | 1     |
| mirL    | 20  | 1     |
| mirL    | 21  | 1     |
| mirL    | 22  | 1     |
| mirR    | 21  | 20    |
| mirR    | 20  | 14    |
| mirR    | 22  | 11    |
| mirR    | 23  | 5     |
| mirR    | 23  | 5     |
| mirR    | 22  | 3     |

```

-----CAGGGGCTGGCTTTCCTCTGG----- mirR 21 3
-----CAGGGGCTGGCTTTCCTCT----- mirR 19 2
-----AGGGGCTGGCTTTCCTCT----- mirR 18 2
-----CAGGGGCTGGCTTTCCTCTGGTCC----- mirR 24 2
-----CAGGGGCTGGCTTTCCTCTG----- mirR 20 1
-----CCAGGGGCTGGCTTTCCTCTGGT----- mirR 23 1
-----CCTTCTCTCCCAATGACTGCGTCTTCATCGAT morR 32 1

```

>mmu-mir-106b

| sequence | species | len | reads |
|----------|---------|-----|-------|
| GA       | mirL    | 21  | 9458  |
| CTAAAGT  | mirL    | 22  | 4224  |
| CTAAAGT  | mirL    | 19  | 1821  |
| CTAAAGT  | mirL    | 20  | 1719  |
| CTAAAGT  | mirL    | 23  | 1699  |
| CTAAAGT  | mirL    | 20  | 1136  |
| CTAAAGT  | mirL    | 21  | 462   |
| CTAAAGT  | mirL    | 22  | 351   |
| CTAAAGT  | mirL    | 19  | 180   |
| CTAAAGT  | mirL    | 18  | 112   |
| CTAAAGT  | mirL    | 19  | 6     |
| CTAAAGT  | mirL    | 18  | 5     |
| CTAAAGT  | mirL    | 20  | 4     |
| CTAAAGT  | mirL    | 22  | 3     |
| CTAAAGT  | mirL    | 21  | 3     |
| CTAAAGT  | mirL    | 20  | 1     |
| GA       | mirL    | 20  | 1     |
| CTAAAGT  | mirL    | 18  | 1     |
| CTAAAGT  | mirL    | 20  | 1     |
| CTAAAGT  | loop    | 18  | 2     |
| CTAAAGT  | loop    | 20  | 1     |
| CTAAAGT  | mirR    | 20  | 2336  |
| CTAAAGT  | mirR    | 21  | 759   |
| CTAAAGT  | mirR    | 19  | 461   |
| CTAAAGT  | mirR    | 22  | 389   |
| CTAAAGT  | mirR    | 23  | 75    |
| CTAAAGT  | mirR    | 22  | 60    |
| CTAAAGT  | mirR    | 24  | 54    |
| CTAAAGT  | mirR    | 18  | 45    |
| CTAAAGT  | mirR    | 21  | 31    |
| CTAAAGT  | mirR    | 21  | 26    |
| CTAAAGT  | mirR    | 23  | 16    |
| CTAAAGT  | mirR    | 20  | 12    |
| CTAAAGT  | mirR    | 19  | 8     |
| CTAAAGT  | mirR    | 20  | 6     |
| CTAAAGT  | mirR    | 24  | 5     |



```

-----CGCACTGTGGGTACTTGCTG----- mirR 20 4
-----TACCGCACTGTGGGTACTTGCTG----- mirR 23 4
-----ACCGCACTGTGGGTACTTGCTG----- mirR 22 4
-----ACCGCACTGTGGGTACTTG----- mirR 19 3
-----GCACTGTGGGTACTTGCT----- mirR 18 2
-----GCACTGTGGGTACTTGCTG----- mirR 19 2
-----ACCGCACTGTGGGTACTT----- mirR 18 1
-----ACCGCACTGTGGGTACTTGCTGCT----- mirR 24 1
-----TACCGCACTGTGGGTACTTGCTGCT----- mirR 25 1
-----CGCACTGTGGGTACTTGCT----- mirR 19 1
-----TCCAGCAGGGCACGTGCA----- morR 18 1
-----TCCAGCAGGGCACGTGCAACGCCCAT morR 26 1
-----GCTCCAGCAGGGCACGTG----- morR 18 1

```

>mmu-mir-195

```

ACACCCAACTCTCCTGGCTCTAGCAGCACAGAAATATTGGCATGGGGAAGTGAGTCTGCCAATATTGGCTGTGCTGCTCCAG species len reads
ACACCCAACTCTCCTGGCTCT----- morL 21 1
-----TAGCAGCACAGAAATATTGGCA----- mirL 22 7411
-----TAGCAGCACAGAAATATTGGC----- mirL 21 7326
-----TAGCAGCACAGAAATATTGGCAT----- mirL 23 6482
-----TAGCAGCACAGAAATATTGG----- mirL 20 1148
-----TAGCAGCACAGAAATATTGGCATG----- mirL 24 974
-----AGCAGCACAGAAATATTGGCAT----- mirL 22 723
-----AGCAGCACAGAAATATTGGCA----- mirL 21 414
-----AGCAGCACAGAAATATTGGC----- mirL 20 221
-----AGCAGCACAGAAATATTGGCATG----- mirL 23 128
-----AGCAGCACAGAAATATTGG----- mirL 19 77
-----GCAGCACAGAAATATTGGCA----- mirL 20 3
-----CTAGCAGCACAGAAATATTGGC----- mirL 22 3
-----CTAGCAGCACAGAAATATTGGCAT----- mirL 24 3
-----CTAGCAGCACAGAAATATTG----- mirL 20 2
-----CAGCACAGAAATATTGGCAT----- mirL 20 2
-----CTAGCAGCACAGAAATATT----- mirL 19 1
-----TCTAGCAGCACAGAAATA----- mirL 18 1
-----TCTAGCAGCACAGAAATATTG----- mirL 21 1
-----GCAGCACAGAAATATTGGC----- mirL 19 1
-----CAGCACAGAAATATTGGCA----- mirL 19 1
-----GCAGCACAGAAATATTGGCAT----- mirL 21 1
-----ATGGGGAAGTGAGTCTGC----- loop 18 1
-----CCAATATTGGCTGTGCTGCTCC-- mirR 22 318
-----CCAATATTGGCTGTGCTGCTCCAG mirR 24 47
-----CCAATATTGGCTGTGCTGCTC--- mirR 21 45
-----CCAATATTGGCTGTGCTGCTCCA- mirR 23 36
-----CCAATATTGGCTGTGCTGCTGCT- mirR 19 28
-----CCAATATTGGCTGTGCTGCTGCT- mirR 20 15
-----CCAATATTGGCTGTGCTGCTGCT- mirR 18 8

```

```

-----CAATATTGGCTGTGCTGCTCCA- mirR 22 4
-----CAATATTGGCTGTGCTGCTCC-- mirR 21 3
-----ATATTGGCTGTGCTGCTCC-- mirR 19 1
-----CAATATTGGCTGTGCTGCTCCAG mirR 23 1
-----AATATTGGCTGTGCTGCTCCAG mirR 22 1

```

>mmu-mir-384

| Species | len | reads |
|---------|-----|-------|
| morL    | 22  | 1     |
| mirL    | 23  | 4895  |
| mirL    | 18  | 2101  |
| mirL    | 22  | 1925  |
| mirL    | 21  | 692   |
| mirL    | 22  | 684   |
| mirL    | 19  | 590   |
| mirL    | 23  | 476   |
| mirL    | 21  | 380   |
| mirL    | 21  | 301   |
| mirL    | 20  | 138   |
| mirL    | 22  | 106   |
| mirL    | 20  | 98    |
| mirL    | 19  | 91    |
| mirL    | 23  | 87    |
| mirL    | 19  | 82    |
| mirL    | 22  | 63    |
| mirL    | 20  | 43    |
| mirL    | 19  | 11    |
| mirL    | 23  | 10    |
| mirL    | 21  | 9     |
| mirL    | 19  | 2     |
| mirL    | 22  | 2     |
| mirL    | 23  | 2     |
| mirL    | 24  | 1     |
| mirL    | 20  | 1     |
| mirL    | 23  | 1     |
| mirL    | 24  | 1     |
| mirL    | 21  | 1     |
| loop    | 18  | 1     |
| loop    | 18  | 1     |
| mirR    | 19  | 3505  |
| mirR    | 21  | 3081  |
| mirR    | 22  | 1363  |
| mirR    | 22  | 714   |
| mirR    | 21  | 692   |
| mirR    | 20  | 621   |
| mirR    | 20  | 425   |

```

-----TCATTCCTAGAAATTGTTCT----- mirR 19 421
-----ATTCCTAGAAATTGTTCA----- mirR 18 269
-----ATTCCTAGAAATTGTTTCA----- mirR 20 235
-----ATTCCTAGAAATTGTTTCAATG----- mirR 23 184
-----TCATTCCTAGAAATTGTTTCAAA----- mirR 23 145
-----CATTCCTAGAAATTGTTTCA----- mirR 21 131
-----CATTCCTAGAAATTGTTTCA----- mirR 19 123
-----TTCTAGAAATTGTTTCA----- mirR 18 106
-----ATTCCTAGAAATTGTTTCAATGCC----- mirR 25 72
-----TTCTAGAAATTGTTTCA----- mirR 19 65
-----CATTCCTAGAAATTGTTCT----- mirR 18 53
-----TCATTCCTAGAAATTGTT----- mirR 18 48
-----TTCTAGAAATTGTTTCAATGC----- mirR 23 39
-----TTCTAGAAATTGTTTCAATG----- mirR 22 35
-----TTCTAGAAATTGTTTCAAA----- mirR 20 35
-----CATTCCTAGAAATTGTTTCAAA----- mirR 22 33
-----TTCTAGAAATTGTTTCAAT----- mirR 21 26
-----TCATTCCTAGAAATTGTTTCAAT----- mirR 24 18
-----CATTCCTAGAAATTGTTTCAAT----- mirR 23 10
-----TCCTAGAAATTGTTTCA----- mirR 18 9
-----TCCTAGAAATTGTTTCAAA----- mirR 19 9
-----TCCTAGAAATTGTTTCAAT----- mirR 20 7
-----TCCTAGAAATTGTTTCAATG----- mirR 21 5
-----CATTCCTAGAAATTGTTTCAATG----- mirR 25 4
-----TTCTAGAAATTGTTTCAATGCC----- mirR 24 3
-----CCTAGAAATTGTTTCAAA----- mirR 18 2
-----GTCATTCCTAGAAATTGTTTCA----- mirR 22 2
-----TCCTAGAAATTGTTTCAATG----- mirR 22 1
-----TCCTAGAAATTGTTTCAATGCC----- mirR 23 1
-----CCTAGAAATTGTTTCAAT----- mirR 19 1
-----GTCATTCCTAGAAATTGTTTCA----- mirR 21 1
-----CACAAATGCCTGTAACATA morR 18 1

```

>mmu-mir-331

```

CTGGTTTTGTTGGGTTTGTCTAGGTATGGTCCCAGGGATCCAGATCAAACCAGGCCCTGGGCTATCCTAGAACCAACCTAAACCCGTGCA species len reads
--GGTTTTGTTGGGTTTGT----- morL 19 2
--GGTTTTGTTGGGTTTGT----- morL 18 1
CTGGTTTTGTTGGGTTTGT----- morL 21 1
---TTTTGTTGGGTTTGTCT----- morL 18 1
-----TCTAGGTATGGTCCCAGGGAT----- mirL 21 57
-----CTAGGTATGGTCCCAGGGAT----- mirL 20 53
-----CTAGGTATGGTCCCAGGGATCC----- mirL 22 41
-----CTAGGTATGGTCCCAGGGATC----- mirL 21 38
-----TCTAGGTATGGTCCCAGGGAT----- mirL 22 16
-----CTAGGTATGGTCCCAGGGATCCC----- mirL 23 14
-----TCTAGGTATGGTCCCAGGGATCC----- mirL 23 12

```

```

-----CTAGGTATGGTCCCAGGG----- mirL 18 7
-----TAGGTATGGTCCCAGGGATCCC----- mirL 22 6
-----TCTAGGTATGGTCCCAGGGATCCC----- mirL 24 4
-----TCTAGGTATGGTCCCAGGGA----- mirL 20 4
-----TAGGTATGGTCCCAGGGATC----- mirL 20 3
-----TTCTAGGTATGGTCCCAGGGATC----- mirL 23 2
-----TAGGTATGGTCCCAGGGATCC----- mirL 21 2
-----TAGGTATGGTCCCAGGGAT----- mirL 19 1
-----TTCTAGGTATGGTCCCAGGGAT----- mirL 22 1
-----AGGTATGGTCCCAGGGATCCCAG----- mirL 23 1
-----AGGTATGGTCCCAGGGATCCCAGAT----- mirL 25 1
-----TTCTAGGTATGGTCCCAGGG----- mirL 20 1
-----TCCCAGATCAAACCAGGC----- loop 18 1
-----GCCCCTGGGCCTATCCTAGA----- mirR 20 9983
-----GCCCCTGGGCCTATCCTAGAA----- mirR 21 4311
-----GCCCCTGGGCCTATCCTAG----- mirR 19 2681
-----GCCCCTGGGCCTATCCTAGAAC----- mirR 22 2451
-----GCCCCTGGGCCTATCCTAGAAC----- mirR 23 1373
-----CCCCTGGGCCTATCCTAGAAC----- mirR 22 978
-----GCCCCTGGGCCTATCCTA----- mirR 18 895
-----CCCTGGGCCTATCCTAGAAC----- mirR 21 760
-----CCCCTGGGCCTATCCTAGA----- mirR 19 656
-----CCCCTGGGCCTATCCTAGAA----- mirR 20 429
-----CCCTGGGCCTATCCTAG----- mirR 18 222
-----CCCTGGGCCTATCCTAGAACCA----- mirR 23 83
-----GCCCCTGGGCCTATCCTAGAACCA----- mirR 24 62
-----CCCTGGGCCTATCCTAGA----- mirR 18 8
-----CCCTGGGCCTATCCTAGAACCA----- mirR 24 6
-----CCCTGGGCCTATCCTAGAA----- mirR 19 2
-----CCTGGGCCTATCCTAGAA----- mirR 18 2
-----CCTGGGCCTATCCTAGAAC----- mirR 20 1
-----GGCCCCTGGGCCTATCCTAGAA----- mirR 22 1
-----CCCTGGGCCTATCCTAGAAC----- mirR 20 1
-----CCAACCTAAACCCGTGCA morR 18 1

>mmu-mir-92a-2
GCATCCATGCCATTCATCCACAGGTGGGGATTGGTGGCATTACTTGTGTTAGATATAAAGTATTGCACTTGTCGCCGCTGAGGAAGAAAGAGGGTTTTT species len reads
GCATCCATGCCATTCAT----- morL 18 1
-----CCACAGGTGGGGATTGGTGGC----- mirL 21 1
-----TATTGCACTTGTCGCCGCTGA----- mirR 22 11479
-----TATTGCACTTGTCGCCGCC----- mirR 19 3641
-----TATTGCACTTGTCGCCGCTG----- mirR 21 2433
-----TATTGCACTTGTCGCCGC----- mirR 18 2253
-----TATTGCACTTGTCGCCGCT----- mirR 20 1362
-----TATTGCACTTGTCGCCGCTGAGG----- mirR 24 950
-----TATTGCACTTGTCGCCGCTGAG----- mirR 23 848

```

```

-----ATTGCACTTGTCCCGCCTGA----- mirR 21 324
-----ATTGCACTTGTCCCGCCTG----- mirR 20 260
-----ATTGCACTTGTCCCGCCT----- mirR 19 206
-----ATTGCACTTGTCCCGGCC----- mirR 18 203
-----ATTGCACTTGTCCCGCCTGAGG----- mirR 23 128
-----ATTGCACTTGTCCCGCCTGAG----- mirR 22 99
-----TGCACCTTGTCCCGCCTGA----- mirR 19 3
-----ATTGCACTTGTCCCGCCTGAGGA----- mirR 24 3
-----TTGCACTTGTCCCGCCTGAGG----- mirR 22 2
-----TTGCACTTGTCCCGCCTG----- mirR 19 1
-----TTGCACTTGTCCCGCCTGA----- mirR 20 1
-----GGAAGAAAGAGGGTTTT morR 18 1

```

>mmu-mir-93

```

TGGACCTTAGTCATGGGGGCTCCAAAGTGCTGTTTCGTGCAGGTAGTGTAAATTACCTGACCTACTGCTGAGCTAGCACTTCCCAGGC species len reads
TGGACCTTAGTCATGGGGG----- morL 19 1
-----CAAAGTGCTGTTTCGTGCAGGTA----- mirL 22 9434
-----CAAAGTGCTGTTTCGTGCAGGTAG----- mirL 23 8207
-----CAAAGTGCTGTTTCGTGCAGGTAGT----- mirL 24 1638
-----CAAAGTGCTGTTTCGTGCAGGT----- mirL 21 1277
-----CAAAGTGCTGTTTCGTGCAGGTAGTG----- mirL 25 1056
-----AAAGTGCTGTTTCGTGCAGGTAG----- mirL 22 23
-----AAAGTGCTGTTTCGTGCAGG----- mirL 19 4
-----AAAGTGCTGTTTCGTGCAGGTA----- mirL 21 4
-----AAAGTGCTGTTTCGTGCAGGTAGT----- mirL 23 4
-----CCAAAGTGCTGTTTCGTGCAGGTAG----- mirL 24 3
-----AAGTGCTGTTTCGTGCAGGTAG----- mirL 21 3
-----AAAGTGCTGTTTCGTGCAG----- mirL 18 3
-----AAGTGCTGTTTCGTGCAGGTAGT----- mirL 22 2
-----AGTGCTGTTTCGTGCAGGTAG----- mirL 20 2
-----CCAAAGTGCTGTTTCGTGCAGGTA----- mirL 23 2
-----AAGTGCTGTTTCGTGCAGGT----- mirL 19 1
-----AGTGCTGTTTCGTGCAGGTAGT----- mirL 21 1
-----TAGTGTAATTACCTGACC----- loop 18 1
-----ACTGCTGAGCTAGCACTTCCCGA----- mirR 23 753
-----ACTGCTGAGCTAGCACTTCCC----- mirR 21 534
-----ACTGCTGAGCTAGCACTTCC----- mirR 20 411
-----ACTGCTGAGCTAGCACTTCCCG----- mirR 22 274
-----ACTGCTGAGCTAGCACTTC----- mirR 19 145
-----ACTGCTGAGCTAGCACTTCCCGAG----- mirR 24 90
-----ACTGCTGAGCTAGCACTTCCCGAGC----- mirR 25 74
-----TACTGCTGAGCTAGCACTTCC----- mirR 21 3
-----CTGCTGAGCTAGCACTTCC----- mirR 19 3
-----CTGCTGAGCTAGCACTTCCC----- mirR 20 3
-----CTGCTGAGCTAGCACTTCCCGA----- mirR 22 2
-----TGCTGAGCTAGCACTTCCCGA----- mirR 21 1

```

```
-----GCTGAGCTAGCACTTCCCGA-- mirR 20 1
-----CTACTGCTGAGCTAGCACTT----- mirR 20 1
-----GCTGAGCTAGCACTTCCCGAG- mirR 21 1
-----CTGCTGAGCTAGCACTTCCCGAG- mirR 23 1
-----TACTGCTGAGCTAGCACT----- mirR 18 1
-----TGCTGAGCTAGCACTTCC----- mirR 18 1
-----CTACTGCTGAGCTAGCACTTCC----- mirR 22 1
```

>mmu-mir-652

```
AACAGCTATGTACTGCACAACCTAGGAGGGGTGCCATTACATAGAGTATAATTGAATGGCGCCACTAGGGTTGTGCAAGTACAGCCTACACAACCTC species len reads
AACAGCTATGTACTGCAC----- morL 18 3
-----CAACCCTAGGAGGGGTGCCATT----- mirL 24 44
-----CAACCCTAGGAGGGGTGCC----- mirL 20 19
-----CAACCCTAGGAGGGGTGCCATT----- mirL 23 18
-----CAACCCTAGGAGGGGTGCC----- mirL 19 17
-----CAACCCTAGGAGGGGTGCCA----- mirL 21 13
-----GCACAACCTAGGAGGGG----- mirL 18 2
-----CCCTAGGAGGGGTGCCA----- mirL 18 1
-----AACCTAGGAGGGGTGCCATTAC----- mirL 25 1
-----AATGGCGCCACTAGGGTTGTGC----- mirR 22 9853
-----AATGGCGCCACTAGGGTTGT----- mirR 20 6909
-----AATGGCGCCACTAGGGTTGTG----- mirR 21 3719
-----AATGGCGCCACTAGGGTTG----- mirR 19 1662
-----AATGGCGCCACTAGGGTTGTGCA----- mirR 23 609
-----AATGGCGCCACTAGGGTT----- mirR 18 505
-----AATGGCGCCACTAGGGTTGTGCAG----- mirR 24 250
-----TTGAATGGCGCCACTAGGG----- mirR 19 55
-----ATGGCGCCACTAGGGTTGTGC----- mirR 21 24
-----ATGGCGCCACTAGGGTTGTGCA----- mirR 22 17
-----ATGGCGCCACTAGGGTTGT----- mirR 19 11
-----TGAATGGCGCCACTAGGGTTGT----- mirR 22 10
-----GAATGGCGCCACTAGGGTTGT----- mirR 21 8
-----ATGGCGCCACTAGGGTTGTGCAG----- mirR 23 6
-----TTGAATGGCGCCACTAGGGTT----- mirR 21 6
-----GAATGGCGCCACTAGGGTTGTGC----- mirR 23 6
-----ATGGCGCCACTAGGGTTGTG----- mirR 20 5
-----TGAATGGCGCCACTAGGGTTG----- mirR 21 4
-----TTGAATGGCGCCACTAGGGT----- mirR 20 4
-----TGAATGGCGCCACTAGGG----- mirR 18 4
-----ATGGCGCCACTAGGGTTG----- mirR 18 3
-----TGGCGCCACTAGGGTTGTG----- mirR 19 2
-----TGAATGGCGCCACTAGGGTT----- mirR 20 2
-----GGCGCCACTAGGGTTGTGCAG----- mirR 21 2
-----GAATGGCGCCACTAGGGTTGTG----- mirR 22 2
-----GGCGCCACTAGGGTTGTGC----- mirR 19 2
-----GGCGCCACTAGGGTTGTGCA----- mirR 20 1
```

```
-----GAATGGCGCCACTAGGGTTG----- mirR 20 1
-----GGCGCCACTAGGGTTGTG----- mirR 18 1
-----TGAATGGCGCCACTAGGGTTGTGC----- mirR 24 1
-----TGGCGCCACTAGGGTTGTGCA----- mirR 21 1
-----TTGAATGGCGCCACTAGG----- mirR 18 1
-----GTACAGCCTACACAACCTC morR 18 1
```

>mmu-mir-532

```
CCATGCCTTGAGTGTAGGACCGTTGACATCTTAATTACCTCCACACCCAAGGCTTGCAGG species len reads
-CATGCCTTGAGTGTAGGACCGT----- mirL 22 10098
-CATGCCTTGAGTGTAGGAC----- mirL 19 3518
-CATGCCTTGAGTGTAGGACCGTT----- mirL 23 1376
-CATGCCTTGAGTGTAGGACC----- mirL 20 1249
-CATGCCTTGAGTGTAGGACCG----- mirL 21 442
--ATGCCTTGAGTGTAGGACCGT----- mirL 21 33
--ATGCCTTGAGTGTAGGACCGTT----- mirL 22 7
CCATGCCTTGAGTGTAGGACCGT----- mirL 23 6
--ATGCCTTGAGTGTAGGAC----- mirL 18 6
---GCCTTGAGTGTAGGACCGT----- mirL 19 3
CCATGCCTTGAGTGTAGGAC----- mirL 20 2
--ATGCCTTGAGTGTAGGACCGTTG----- mirL 23 2
---TGCCTTGAGTGTAGGACCGTT----- mirL 21 2
CCATGCCTTGAGTGTAGGA----- mirL 19 1
---TGCCTTGAGTGTAGGACCGT----- mirL 20 1
--ATGCCTTGAGTGTAGGACC----- mirL 19 1
CCATGCCTTGAGTGTAGGACCGTT----- mirL 24 1
-----CCTCCACACCCAAGGCTTGC--- mirR 21 3379
-----CCTCCACACCCAAGGCTTGCA-- mirR 22 1979
-----CCTCCACACCCAAGGCTTG--- mirR 20 505
-----CCTCCACACCCAAGGCTT---- mirR 19 335
-----CCTCCACACCCAAGGCTTGCAG- mirR 23 141
-----CCTCCACACCCAAGGCT----- mirR 18 44
-----CCTCCACACCCAAGGCTTGCAGG mirR 24 22
-----CTCCACACCCAAGGCTTGC--- mirR 20 6
-----TCCACACCCAAGGCTTGC--- mirR 19 6
-----CTCCACACCCAAGGCTTGCA-- mirR 21 3
-----CCCACACCCAAGGCTTGC--- mirR 18 2
-----TCCACACCCAAGGCTTGCA-- mirR 20 2
-----CCCACACCCAAGGCTTGCA-- mirR 19 2
-----CTCCACACCCAAGGCTTG--- mirR 19 2
-----CCCTCCACACCCAAGGCTTGC--- mirR 22 1
-----CCCTCCACACCCAAGGCTTG--- mirR 21 1
-----TCCACACCCAAGGCTTGCAGG mirR 22 1
```

>mmu-mir-320

```
CCTTCTCTCCCGGTTCTTCCCGGAGTCGGGAAAAGCTGGGTTGAGAGGGCGAAAAGGATGTGGGAG species len reads
```

```

---TCTCTTCCCGTTCTTCC----- mirL 18 7
---CTCTTCCCGTTCTTCCC----- mirL 18 5
---TCTCTTCCCGTTCTTCCC----- mirL 19 4
---TCTCTTCCCGTTCTTCCC----- mirL 20 2
---TCTTCCCGTTCTTCCCG----- mirL 19 1
-CTTCTCTTCCCGTTCTTCC----- mirL 20 1
CCTTCTCTTCCCGTTCT----- mirL 18 1
-----AAAAGCTGGGTTGAGAGGGCGA----- mirR 22 8194
-----AAAAGCTGGGTTGAGAGGGCGAA----- mirR 23 4656
-----AAAAGCTGGGTTGAGAGGGC----- mirR 20 3910
-----AAAAGCTGGGTTGAGAGGGCGAAA----- mirR 24 1478
-----AAAAGCTGGGTTGAGAGGGCG----- mirR 21 1239
-----AAAAGCTGGGTTGAGAGG----- mirR 18 1177
-----AAAAGCTGGGTTGAGAGGG----- mirR 19 884
-----AAAGCTGGGTTGAGAGGGCGA----- mirR 21 276
-----AAAGCTGGGTTGAGAGGGCGAA----- mirR 22 186
-----AAAGCTGGGTTGAGAGGGC----- mirR 19 163
-----AAAGCTGGGTTGAGAGGGCGAAA----- mirR 23 114
-----AAAGCTGGGTTGAGAGGGCG----- mirR 20 52
-----GAAAAGCTGGGTTGAGAGGGCGA----- mirR 23 46
-----AAGCTGGGTTGAGAGGGCGAAA----- mirR 22 41
-----AAGCTGGGTTGAGAGGGCGA----- mirR 20 38
-----AAGCTGGGTTGAGAGGGCGAA----- mirR 21 27
-----AAAGCTGGGTTGAGAGGG----- mirR 18 27
-----AAGCTGGGTTGAGAGGGC----- mirR 18 26
-----GAAAAGCTGGGTTGAGAGGGC----- mirR 21 20
-----GAAAAGCTGGGTTGAGAGG----- mirR 19 17
-----AAGCTGGGTTGAGAGGGCGAAA----- mirR 23 15
-----AAAGCTGGGTTGAGAGGGCGAAA----- mirR 24 13
-----GAAAAGCTGGGTTGAGAG----- mirR 18 13
-----GAAAAGCTGGGTTGAGAGGGCG----- mirR 22 10
-----AAGCTGGGTTGAGAGGGCG----- mirR 19 10
-----GAAAAGCTGGGTTGAGAGGGCGAA----- mirR 24 6
-----GAAAAGCTGGGTTGAGAGGG----- mirR 20 5
-----AGCTGGGTTGAGAGGGCGAAA----- mirR 21 3
-----AAGCTGGGTTGAGAGGGCGAAAA----- mirR 24 2
-----AGCTGGGTTGAGAGGGCGAAAA----- mirR 23 1
-----AGCTGGGTTGAGAGGGCGAA----- mirR 20 1
-----CGAAAAGGATGTGGGAG morR 18 1

```

```

>mmu-mir-135b
CCTATGGCTTTTCATTCCTATGTGATTGCTGCTCCGAACATCATGAGGGCTAAAAGCCATGGGCTA species len reads
--TATGGCTTTTCATTCCTATGT----- mirL 21 11054
--TATGGCTTTTCATTCCTATGT----- mirL 22 3220
--TATGGCTTTTCATTCCTATGTGA----- mirL 23 3138
--TATGGCTTTTCATTCCTATG----- mirL 20 2514

```



```

--TATGGCTTTTCATTCCCTAT----- mirL 19 1183
---ATGGCTTTTCATTCCCTATGT----- mirL 20 457
---ATGGCTTTTCATTCCCTATGTGA----- mirL 22 143
---ATGGCTTTTCATTCCCTATGTG----- mirL 21 132
---ATGGCTTTTCATTCCCTATG----- mirL 19 94
---ATGGCTTTTCATTCCCTAT----- mirL 18 34
-CTATGGCTTTTCATTCCCTATGT----- mirL 22 5
-CTATGGCTTTTCATTCCCTATG----- mirL 21 4
-CTATGGCTTTTCATTCCCTATGTGA----- mirL 24 2
----GGCTTTTCATTCCCTATGT----- mirL 18 1
----TGGCTTTTCATTCCCTATGT----- mirL 19 1
-CTATGGCTTTTCATTCCCTATGTG----- mirL 23 1
CCTATGGCTTTTCATTCCCTATGT----- mirL 23 1
-----GATTGCTGCTCCGAACTC----- loop 18 5
-----ATTGCTGCTCCGAACTCA----- loop 18 3
-----TGATTGCTGCTCCGAACTC----- loop 19 2
-----TGATTGCTGCTCCGAACT----- loop 18 1
-----ATGTAGGGCTAAAAGCCATGGGC-- mirR 23 6
-----TGTAGGGCTAAAAGCCATGGGCT- mirR 23 2
-----TAGGGCTAAAAGCCATGGGC-- mirR 20 2
-----TGTAGGGCTAAAAGCCATG---- mirR 19 1
-----GTAGGGCTAAAAGCCATGGGCT- mirR 22 1
-----ATGTAGGGCTAAAAGCCATGGG-- mirR 22 1
-----ATGTAGGGCTAAAAGCCATG---- mirR 20 1
-----ATGTAGGGCTAAAAGCCATGGGCT- mirR 24 1
-----TGTAGGGCTAAAAGCCATGGGCTA mirR 24 1
-----TGTAGGGCTAAAAGCCATGGG-- mirR 21 1

```

>mmu-mir-153

```

GCTACTTAGCGGTGGCCGGTGTGATTTTTGTGACGTTGCAGCTAGTAATATGAGCCAGTTGCATAGTCACAAAAGTGATCATTGG species len reads
GCTACTTAGCGGTGGCCG----- morL 18 5
---ACTTAGCGGTGGCCGGTG----- morL 18 1
GCTACTTAGCGGTGGCCGGTG----- morL 21 1
-----GTCATTTTTGTGACGTTGCAGC----- mirL 22 163
-----GTCATTTTTGTGACGTTGC----- mirL 19 119
-----GTCATTTTTGTGACGTTGCAGCT----- mirL 23 56
-----TCATTTTTGTGACGTTGCAGCT----- mirL 22 48
-----TCATTTTTGTGACGTTGCAGC----- mirL 21 33
-----GTCATTTTTGTGACGTTGCA----- mirL 20 21
-----TCATTTTTGTGACGTTGC----- mirL 18 16
-----TCATTTTTGTGACGTTGCA----- mirL 19 13
-----TCATTTTTGTGACGTTGCAGCTA----- mirL 23 11
-----GTCATTTTTGTGACGTTGCAG----- mirL 21 9
-----CATTTTTGTGACGTTGCAGCT----- mirL 21 8
-----CATTTTTGTGACGTTGCAGCTA----- mirL 22 3
-----CATTTTTGTGACGTTGCA----- mirL 18 1

```

```

-----ATTTTTGTGACGTTGCAG----- mirL 18 1
-----TTGCATAGTCACAAAAGTGATC----- mirR 22 10800
-----TTGCATAGTCACAAAAGTGATCA----- mirR 23 2111
-----TTGCATAGTCACAAAAGTGAT----- mirR 21 1996
-----TTGCATAGTCACAAAAGTGATCAT--- mirR 24 1873
-----TTGCATAGTCACAAAAGTGA----- mirR 20 1252
-----TTGCATAGTCACAAAAGTG----- mirR 19 913
-----TGCATAGTCACAAAAGTGATC----- mirR 21 633
-----TTGCATAGTCACAAAAGT----- mirR 18 575
-----TGCATAGTCACAAAAGTGATCA----- mirR 22 490
-----TGCATAGTCACAAAAGTGATCAT--- mirR 23 222
-----TGCATAGTCACAAAAGTGAT----- mirR 20 146
-----TGCATAGTCACAAAAGTGA----- mirR 19 65
-----TGCATAGTCACAAAAGTGATCAT--- mirR 24 26
-----TGCATAGTCACAAAAGTG----- mirR 18 21
-----CATAGTCACAAAAGTGATC----- mirR 19 18
-----GCATAGTCACAAAAGTGATCAT--- mirR 22 17
-----CATAGTCACAAAAGTGATCAT--- mirR 22 15
-----GCATAGTCACAAAAGTGATC----- mirR 20 12
-----GCATAGTCACAAAAGTGATCA----- mirR 21 11
-----CATAGTCACAAAAGTGATCAT--- mirR 21 10
-----CATAGTCACAAAAGTGATCA----- mirR 20 5
-----GCATAGTCACAAAAGTGAT----- mirR 19 4
-----CATAGTCACAAAAGTGATCATTG--- mirR 23 3
-----CATAGTCACAAAAGTGATCATTGG  mirR 24 2
-----GCATAGTCACAAAAGTGA----- mirR 18 2
-----GCATAGTCACAAAAGTGATCATTGG  mirR 25 1
-----AGTTGCATAGTCACAAAAGTG----- mirR 21 1
-----GTTGCATAGTCACAAAAGTGATCAT--- mirR 25 1
-----AGTTGCATAGTCACAAAAGTGA----- mirR 22 1
-----CATAGTCACAAAAGTGAT----- mirR 18 1

```

>mmu-mir-17

```

CCAGTCAGAATAATGTCAAAGTGCTTACAGTGCAGGTAGTGATGTGTGCATCTACTGCAGTGAGGGCAGTTGTAGCATTATGCTGACAGCTGCCT species len reads
CCAGTCAGAATAATGTCAA----- morL 18 1
-----CAAAGTGCTTACAGTGCAGGTAG----- mirL 23 6428
-----CAAAGTGCTTACAGTGCAGGTA----- mirL 22 4541
-----CAAAGTGCTTACAGTGCAGGT----- mirL 21 4435
-----CAAAGTGCTTACAGTGCAGG----- mirL 20 1603
-----CAAAGTGCTTACAGTGCAGGTAGT----- mirL 24 1522
-----TCAAAGTGCTTACAGTGCAGGT----- mirL 22 375
-----TCAAAGTGCTTACAGTGCAGGTA----- mirL 23 242
-----TCAAAGTGCTTACAGTGCAGG----- mirL 21 154
-----TCAAAGTGCTTACAGTGCAG----- mirL 20 94
-----TCAAAGTGCTTACAGTGCAGGTAG----- mirL 24 78
-----AAAGTGCTTACAGTGCAGGTAG----- mirL 22 25

```

```

-----AAAGTGCTTACAGTGCAGGTAGT----- mirL 23 4
-----AAGTGCTTACAGTGCAGGTA----- mirL 20 4
-----AAAGTGCTTACAGTGCAGGTA----- mirL 21 4
-----AAGTGCTTACAGTGCAGGTAG----- mirL 21 3
-----AAAGTGCTTACAGTGCAG----- mirL 18 2
-----AGTGCTTACAGTGCAGGTAG----- mirL 20 2
-----AAGTGCTTACAGTGCAGGT----- mirL 19 2
-----AAGTGCTTACAGTGCAGGTAGT----- mirL 22 2
-----GTCAAAGTGCTTACAGTGCAGGTA----- mirL 24 1
-----AAAGTGCTTACAGTGCAGGT----- mirL 20 1
-----AGTGATGTGTGCATCTACT----- loop 19 10
-----AGTGATGTGTGCATCTAC----- loop 18 1
-----ACTGCAGTGAGGGCACTTGTAGC----- mirR 23 168
-----ACTGCAGTGAGGGCACTTGT----- mirR 20 162
-----ACTGCAGTGAGGGCACTTGTAG----- mirR 22 134
-----ACTGCAGTGAGGGCACTTGTAG----- mirR 21 95
-----ACTGCAGTGAGGGCACTTGT----- mirR 19 46
-----ACTGCAGTGAGGGCACTT----- mirR 18 10
-----ACTGCAGTGAGGGCACTTGTAGCA----- mirR 24 10
-----TACTGCAGTGAGGGCACTTGT----- mirR 21 2
-----CTGCAGTGAGGGCACTTGTAG----- mirR 21 2
-----TGCAGTGAGGGCACTTGTAG----- mirR 20 1
-----TGCAGTGAGGGCACTTGT----- mirR 18 1
-----GCATTATGCTGACAGCTG----- morR 18 1
-----ATTATGCTGACAGCTGCCT----- morR 19 1

```

>mmu-mir-330

```

CCTTTGGCGATCTCTGCCTCTCTGGGCCTGTGTCTTAGGCTCTTCAAGATCCAACGAGCAAAGCACAGGGCCTGCAGAGAGGTAGCGCTCTGCTC species len reads
CCTTTGGCGATCTCTGCTC----- morL 18 2
-----TCTCTGGGCCTGTGTCTTAG----- mirL 20 1180
-----TCTCTGGGCCTGTGTCTTAGGC----- mirL 22 1042
-----TCTCTGGGCCTGTGTCTTA----- mirL 19 646
-----TCTCTGGGCCTGTGTCTTAGGCTC----- mirL 24 435
-----TCTCTGGGCCTGTGTCTTAGG----- mirL 21 240
-----CTCTGGGCCTGTGTCTTAG----- mirL 19 112
-----CTCTGGGCCTGTGTCTTAGGCTC----- mirL 23 83
-----CTCTGGGCCTGTGTCTTA----- mirL 18 71
-----CTCTGGGCCTGTGTCTTAGGC----- mirL 21 56
-----CTCTGGGCCTGTGTCTTAGGCT----- mirL 22 55
-----CTGGGCCTGTGTCTTAGGC----- mirL 19 1
-----CTGGGCCTGTGTCTTAGGCTC----- mirL 21 1
-----TCTGGGCCTGTGTCTTAGGCTC----- mirL 22 1
-----TCTGGGCCTGTGTCTTAGGC----- mirL 20 1
-----CTCTCTGGGCCTGTGTCTTAG----- mirL 21 1
-----TCTTCAAGATCCAACGAGCAA----- loop 21 1
-----TCTTCAAGATCCAACGAGC----- loop 19 1

```

```

-----TCTTCAAGATCCAACGAG----- loop 18 1
-----CAAAGCACAGGGCCTGCAGAGA----- mirR 22 2545
-----CAAAGCACAGGGCCTGCAGAGAG----- mirR 23 2057
-----CAAAGCACAGGGCCTGCAGAG----- mirR 21 1739
-----CAAAGCACAGGGCCTGCAGA----- mirR 20 1644
-----GCAAAGCACAGGGCCTGCAGA----- mirR 21 1190
-----GCAAAGCACAGGGCCTGCAGAGA----- mirR 23 995
-----GCAAAGCACAGGGCCTGC----- mirR 18 895
-----CAAAGCACAGGGCCTGCAG----- mirR 19 837
-----GCAAAGCACAGGGCCTGCAGAG----- mirR 22 820
-----CAAAGCACAGGGCCTGCAGAGAG----- mirR 24 607
-----GCAAAGCACAGGGCCTGCAGAGAG----- mirR 24 570
-----GCAAAGCACAGGGCCTGCAG----- mirR 20 525
-----CAAAGCACAGGGCCTGCA----- mirR 18 310
-----GCAAAGCACAGGGCCTGCAGAGAG----- mirR 25 272
-----AAAGCACAGGGCCTGCAGAGA----- mirR 21 6
-----AAGCACAGGGCCTGCAGAGAG----- mirR 22 5
-----AAGCACAGGGCCTGCAGAGAG----- mirR 21 4
-----AAAGCACAGGGCCTGCAGAG----- mirR 20 4
-----AAAGCACAGGGCCTGCAGA----- mirR 19 3
-----AAAGCACAGGGCCTGCAGAGAG----- mirR 23 3
-----AAGCACAGGGCCTGCAGA----- mirR 18 3
-----AGCAAAGCACAGGGCCTGCAGA----- mirR 22 3
-----AGCAAAGCACAGGGCCTGCAGAGA----- mirR 24 2
-----AAGCACAGGGCCTGCAGAGAGGT----- mirR 23 2
-----AGCACAGGGCCTGCAGAGAG----- mirR 20 1
-----AGCACAGGGCCTGCAGAGAG----- mirR 21 1
-----AGCACAGGGCCTGCAGAGAGGTAG----- mirR 24 1
-----GAGCAAAGCACAGGGCCTGCAGAGA----- mirR 25 1
-----AGCACAGGGCCTGCAGAG----- mirR 18 1
-----AAAGCACAGGGCCTGCAG----- mirR 18 1
-----AAAGCACAGGGCCTGCAGAGAGGTAGC----- mirR 27 1
-----AAAGCACAGGGCCTGCAGAGAG----- mirR 22 1
-----AAGCACAGGGCCTGCAGAG----- mirR 19 1
-----AAGCACAGGGCCTGCAGAG----- mirR 19 1
-----AGAGGTAGCGCTCTGCTC morR 18 1

```

```

>mmu-mir-544
ATCTTGTTAAAAAGCAGAGTCTGATTGAGGGCCAAGATTCTGCATTTTTCAGCAAGCTCTC species len reads
-TCTTGTTAAAAAGCAGAGTCT----- mirL 21 1487
--CTTGTTAAAAAGCAGAGTCT----- mirL 20 1284
-TCTTGTTAAAAAGCAGAGT----- mirL 19 687
-TCTTGTTAAAAAGCAGAGTC----- mirL 20 283
--CTTGTTAAAAAGCAGAGT----- mirL 18 182
-TCTTGTTAAAAAGCAGAGTCTG----- mirL 22 168
--CTTGTTAAAAAGCAGAGTCTG----- mirL 21 60
--CTTGTTAAAAAGCAGAGTC----- mirL 19 60

```

```

-TCTTGTTAAAAAGCAGAG----- mirL 18 13
--CTTGTTAAAAAGCAGAGTCTGA----- mirL 22 13
ATCTTGTTAAAAAGCAGAGTCT----- mirL 22 5
ATCTTGTTAAAAAGCAGAGTC----- mirL 21 2
---TTGTTAAAAAGCAGAGTCT----- mirL 19 1
----TGTTAAAAAGCAGAGTCT----- mirL 18 1
-----TCTGATTGAGGGCCAAG----- loop 18 1
-----ATTCTGCATTTTGTAGCAAGCTC-- mirR 22 7293
-----ATTCTGCATTTTGTAGCAAGCTCT- mirR 23 2396
-----ATTCTGCATTTTGTAGCAAGC--- mirR 20 2269
-----ATTCTGCATTTTGTAGCAAG---- mirR 19 1040
-----ATTCTGCATTTTGTAGCAAGCT--- mirR 21 714
-----ATTCTGCATTTTGTAGCAAGCTCTC mirR 24 304
-----ATTCTGCATTTTGTAGCAA----- mirR 18 240
-----TCTGCATTTTGTAGCAAGCTCT- mirR 21 23
-----TCTGCATTTTGTAGCAAGCTC-- mirR 20 18
-----AGATTCTGCATTTTGTAGCAAGC--- mirR 22 14
-----GATTCTGCATTTTGTAGCAAGC--- mirR 21 10
-----TCTGCATTTTGTAGCAAGC--- mirR 18 9
-----GATTCTGCATTTTGTAGCAAGCTC-- mirR 23 8
-----AGATTCTGCATTTTGTAGC----- mirR 18 8
-----AGATTCTGCATTTTGTAGCAAGCT--- mirR 23 5
-----AGATTCTGCATTTTGTAGCA----- mirR 19 5
-----GATTCTGCATTTTGTAGCAAGCT--- mirR 22 5
-----AGATTCTGCATTTTGTAGCAAGCTC-- mirR 24 4
-----TCTGCATTTTGTAGCAAGCT--- mirR 19 4
-----AGATTCTGCATTTTGTAGCAA----- mirR 20 3
-----TTCTGCATTTTGTAGCAAGCTC-- mirR 21 3
-----GATTCTGCATTTTGTAGCAA----- mirR 19 3
-----GATTCTGCATTTTGTAGCAAG---- mirR 20 2
-----TTCTGCATTTTGTAGCAAGC--- mirR 19 2
-----TTCTGCATTTTGTAGCAAGCTCT- mirR 22 2
-----AGATTCTGCATTTTGTAGCAAG---- mirR 21 2
-----CTGCATTTTGTAGCAAGCTCT- mirR 20 1
-----CTGCATTTTGTAGCAAGCTC-- mirR 19 1
-----AAGATTCTGCATTTTGTAGCAAGC--- mirR 23 1
-----AAGATTCTGCATTTTGTAGCAA----- mirR 21 1
-----GATTCTGCATTTTGTAGCAAGCTCTC mirR 25 1
-----TTCTGCATTTTGTAGCAAGCTCTC mirR 23 1

```

>mmu-mir-873

```

CAGTTTGTGTGCATTTGCAGGAACCTGTGAGTCTCCTATTGAAAATAGACAGGAGACTGACAAGTTCCTGGGAACACCCACAAATCTTCTACTGGTTT species len reads
CAGTTTGTGTGCATTTGC----- morL 18 4
-----GCAGGAACCTGTGAGTCTCCT----- mirL 21 5090
-----GCAGGAACCTGTGAGTCTCCTA----- mirL 22 3882
-----GCAGGAACCTGTGAGTCTCCTAT----- mirL 23 1548

```

```

-----TGCAGGAACCTGTGAGTCT----- mirL 19 1487
-----GCAGGAACCTGTGAGTCTCC----- mirL 20 1170
-----TGCAGGAACCTGTGAGTCTCCT----- mirL 22 1089
-----GCAGGAACCTGTGAGTCTC----- mirL 19 909
-----TGCAGGAACCTGTGAGTCTCC----- mirL 21 705
-----TGCAGGAACCTGTGAGTCTCCTA----- mirL 23 623
-----TGCAGGAACCTGTGAGTCTC----- mirL 20 391
-----CAGGAACCTGTGAGTCTCCT----- mirL 20 7
-----CAGGAACCTGTGAGTCTCCTA----- mirL 21 5
-----TTGCAGGAACCTGTGAGTCTCC----- mirL 22 3
-----GGAACCTGTGAGTCTCCTAT----- mirL 20 2
-----CAGGAACCTGTGAGTCTCCTAT----- mirL 22 2
-----AGGAACCTGTGAGTCTCCT----- mirL 19 2
-----GGAACCTGTGAGTCTCCTATT----- mirL 21 1
-----TTGCAGGAACCTGTGAGTCTC----- mirL 21 1
-----AGGAACCTGTGAGTCTCCTA----- mirL 20 1
-----GGAACCTGTGAGTCTCCTA----- mirL 19 1
-----CAGGAACCTGTGAGTCTCC----- mirL 19 1
-----GGAACCTGTGAGTCTCCT----- mirL 18 1
-----GAGACTGACAAGTTCCCGGG----- mirR 20 221
-----GAGACTGACAAGTTCCCGGGA----- mirR 21 164
-----GAGACTGACAAGTTCCCGGGAAC----- mirR 23 150
-----GAGACTGACAAGTTCCCGG----- mirR 19 74
-----GAGACTGACAAGTTCCCGGGA----- mirR 22 64
-----GGAGACTGACAAGTTCCCGGGA----- mirR 22 15
-----GAGACTGACAAGTTCCCGGGAACA----- mirR 24 8
-----AGACTGACAAGTTCCCGGGAAC----- mirR 22 6
-----GGAGACTGACAAGTTCCCGGG----- mirR 21 6
-----AGGAGACTGACAAGTTCCCGGG----- mirR 22 5
-----AGACTGACAAGTTCCCGGGA----- mirR 20 4
-----GGAGACTGACAAGTTCCCGG----- mirR 20 3
-----GAGACTGACAAGTTCCCGGGAACAC----- mirR 25 3
-----GGAGACTGACAAGTTCCCGGGA----- mirR 23 3
-----CAGGAGACTGACAAGTTCCCGG----- mirR 22 3
-----AGACTGACAAGTTCCCGG----- mirR 18 2
-----AGACTGACAAGTTCCCGGG----- mirR 19 2
-----CAGGAGACTGACAAGTTC----- mirR 18 2
-----CAGGAGACTGACAAGTTCCCGGGA----- mirR 24 1
-----CAGGAGACTGACAAGTTC----- mirR 19 1
-----AGACTGACAAGTTCCCGGGA----- mirR 21 1
-----GGAGACTGACAAGTTCCCGGGAAC----- mirR 24 1
-----CAGGAGACTGACAAGTTCCCGGGA----- mirR 25 1
-----GGAGACTGACAAGTTC----- mirR 18 1
-----GACTGACAAGTTCCCGGGA----- mirR 20 1
-----AGGAGACTGACAAGTTCCCGG----- mirR 21 1
-----CAGGAGACTGACAAGTTC----- mirR 21 1

```

-----CACCCACAAATCTTCTACTGGTTT morR 25 1  
-----ACACCCACAAATCTTCTCT----- morR 18 1

>mmu-mir-425

| GCATGGAAAGTGCTTTGGAATGACACGATCACTCCCGTTGAGTGGGCACCCAAGAAGCCATCGGGAATGTCGTGTCCGCCAGT | species | len | reads |
|-------------------------------------------------------------------------------------|---------|-----|-------|
| GCATGGAAAGTGCTTTGG-----                                                             | morL    | 18  | 1     |
| -----AATGACACGATCACTCCCGTTG-----                                                    | mirL    | 22  | 7075  |
| -----AATGACACGATCACTCCCGTTGA-----                                                   | mirL    | 23  | 2370  |
| -----AATGACACGATCACTCCCGTT-----                                                     | mirL    | 21  | 1564  |
| -----AATGACACGATCACTCCC-----                                                        | mirL    | 18  | 856   |
| -----AATGACACGATCACTCCCGT-----                                                      | mirL    | 20  | 739   |
| -----ATGACACGATCACTCCCGTTGA-----                                                    | mirL    | 22  | 24    |
| -----ATGACACGATCACTCCCGTTG-----                                                     | mirL    | 21  | 20    |
| -----ATGACACGATCACTCCCGTT-----                                                      | mirL    | 20  | 8     |
| -----ATGACACGATCACTCCCG-----                                                        | mirL    | 18  | 5     |
| -----GAATGACACGATCACTCCCGTT-----                                                    | mirL    | 22  | 4     |
| -----GACACGATCACTCCCGTTG-----                                                       | mirL    | 19  | 4     |
| -----GAATGACACGATCACTCCCGTTG-----                                                   | mirL    | 23  | 3     |
| -----ATGACACGATCACTCCCGT-----                                                       | mirL    | 19  | 3     |
| -----GAATGACACGATCACTCC-----                                                        | mirL    | 18  | 2     |
| -----GACACGATCACTCCCGTT-----                                                        | mirL    | 18  | 1     |
| -----GGAATGACACGATCACTC-----                                                        | mirL    | 18  | 1     |
| -----TGACACGATCACTCCCGTTGAG-----                                                    | mirL    | 22  | 1     |
| -----TGACACGATCACTCCCGTTGAGT-----                                                   | mirL    | 23  | 1     |
| -----GACACGATCACTCCCGTTGA-----                                                      | mirL    | 20  | 1     |
| -----AGTGGGCACCCAAGAAGC-----                                                        | loop    | 18  | 1     |
| -----GGGCACCCAAGAAGCCAT-----                                                        | loop    | 18  | 1     |
| -----ATCGGGAATGTCGTGTCCGCC-----                                                     | mirR    | 22  | 861   |
| -----ATCGGGAATGTCGTGTCC-----                                                        | mirR    | 18  | 640   |
| -----ATCGGGAATGTCGTGTCCGCC-----                                                     | mirR    | 21  | 528   |
| -----ATCGGGAATGTCGTGTCCGC-----                                                      | mirR    | 20  | 512   |
| -----ATCGGGAATGTCGTGTCCGCCAG-----                                                   | mirR    | 24  | 184   |
| -----CATCGGGAATGTCGTGTCCGC-----                                                     | mirR    | 21  | 181   |
| -----CATCGGGAATGTCGTGTCCGCC-----                                                    | mirR    | 22  | 162   |
| -----CATCGGGAATGTCGTGTCC-----                                                       | mirR    | 18  | 159   |
| -----CATCGGGAATGTCGTGTCC-----                                                       | mirR    | 19  | 149   |
| -----CATCGGGAATGTCGTGTCCGCC-----                                                    | mirR    | 23  | 112   |
| -----ATCGGGAATGTCGTGTCCG-----                                                       | mirR    | 19  | 112   |
| -----ATCGGGAATGTCGTGTCCGCCA-----                                                    | mirR    | 23  | 108   |
| -----TCGGGAATGTCGTGTCCGC-----                                                       | mirR    | 19  | 67    |
| -----TCGGGAATGTCGTGTCCGCC-----                                                      | mirR    | 21  | 62    |
| -----TCGGGAATGTCGTGTCCGCC-----                                                      | mirR    | 20  | 59    |
| -----CATCGGGAATGTCGTGTCCG-----                                                      | mirR    | 20  | 35    |
| -----TCGGGAATGTCGTGTCCGCCAG-----                                                    | mirR    | 23  | 29    |
| -----CATCGGGAATGTCGTGTCCGCCA-----                                                   | mirR    | 24  | 22    |
| -----CCATCGGGAATGTCGTGTCCGC-----                                                    | mirR    | 22  | 20    |

```

-----TCGGGAATGTCGTGTCCGCCA-- mirR 22 16
-----TCGGGAATGTCGTGTCCG----- mirR 18 16
-----TCGGGAATGTCGTGTCCGCCAGT mirR 24 8
-----CCATCGGGAATGTCGTGTC----- mirR 19 7
-----CCATCGGGAATGTCGTGTCCGCC--- mirR 23 6
-----CGGGAATGTCGTGTCCGCC--- mirR 19 6
-----CGGGAATGTCGTGTCCGCCCAG- mirR 22 5
-----CCATCGGGAATGTCGTGTCCG----- mirR 21 5
-----CCATCGGGAATGTCGTGTCC----- mirR 20 5
-----CGGGAATGTCGTGTCCGCC--- mirR 20 4
-----GGGAATGTCGTGTCCGCC--- mirR 19 4
-----GGGAATGTCGTGTCCGCC--- mirR 18 2
-----CCATCGGGAATGTCGTGTCCGCC--- mirR 24 2
-----CGGGAATGTCGTGTCCGC----- mirR 18 2
-----CGGGAATGTCGTGTCCGCCCAGT mirR 23 1
-----GCCATCGGGAATGTCGTGTC----- mirR 20 1
-----CCATCGGGAATGTCGTGT----- mirR 18 1

```

>mmu-mir-141

| sequence                                                                          | species | len  | reads |
|-----------------------------------------------------------------------------------|---------|------|-------|
| TCCATCTTCCAGTGCAGTGTGGATGGTTGAAGTATGAAGCTCCTAACACTGTCTGGTAAAGATGGCCCCGGGTCACTTCCT | mirL 22 | 562  |       |
| TCCATCTTCCAGTGCAGTGTGG-----                                                       | mirL 23 | 145  |       |
| TCCATCTTCCAGTGCAGTGTGG-----                                                       | mirL 21 | 121  |       |
| TCCATCTTCCAGTGCAGTGT-----                                                         | mirL 20 | 75   |       |
| TCCATCTTCCAGTGCAGTGTGGA-----                                                      | mirL 24 | 48   |       |
| -CCATCTTCCAGTGCAGTGTGG-----                                                       | mirL 21 | 36   |       |
| -CCATCTTCCAGTGCAGTGTGG-----                                                       | mirL 22 | 22   |       |
| --CATCTTCCAGTGCAGTGTGG-----                                                       | mirL 21 | 14   |       |
| --CATCTTCCAGTGCAGTGTGGA-----                                                      | mirL 22 | 12   |       |
| -CCATCTTCCAGTGCAGTGT-----                                                         | mirL 20 | 11   |       |
| -CCATCTTCCAGTGCAGTGTGGA-----                                                      | mirL 23 | 10   |       |
| --CATCTTCCAGTGCAGTGTGGAT-----                                                     | mirL 23 | 6    |       |
| -CCATCTTCCAGTGCAGTGT-----                                                         | mirL 19 | 6    |       |
| --CATCTTCCAGTGCAGTGTGG-----                                                       | mirL 20 | 2    |       |
| --CATCTTCCAGTGCAGTGT-----                                                         | mirL 18 | 1    |       |
| ---ATCTTCCAGTGCAGTGTGGATGG-----                                                   | mirL 24 | 1    |       |
| ---ATCTTCCAGTGCAGTGTGG-----                                                       | mirL 19 | 1    |       |
| -----TAACACTGTCTGGTAAAGATGG-----                                                  | mirR 22 | 4250 |       |
| -----TAACACTGTCTGGTAAAGATGGC-----                                                 | mirR 23 | 2924 |       |
| -----TAACACTGTCTGGTAAAGATG-----                                                   | mirR 21 | 1843 |       |
| -----TAACACTGTCTGGTAAAGATGGCCC-----                                               | mirR 25 | 1529 |       |
| -----TAACACTGTCTGGTAAAGATGGCC-----                                                | mirR 24 | 1273 |       |
| -----TAACACTGTCTGGTAAAGAT-----                                                    | mirR 20 | 557  |       |
| -----AACACTGTCTGGTAAAGATGG-----                                                   | mirR 21 | 367  |       |
| -----TAACACTGTCTGGTAAAGA-----                                                     | mirR 19 | 345  |       |
| -----AACACTGTCTGGTAAAGATGGC-----                                                  | mirR 22 | 184  |       |



```

-----AACACTGTCTGGTAAAGATG----- mirR 20 144
-----AACACTGTCTGGTAAAGATGGCC----- mirR 23 135
-----AACACTGTCTGGTAAAGATGGCCC----- mirR 24 87
-----AACACTGTCTGGTAAAGAT----- mirR 19 53
-----AACACTGTCTGGTAAAGATGGCCCC----- mirR 25 34
-----CTAACACTGTCTGGTAAAGAT----- mirR 21 13
-----CTAACACTGTCTGGTAAAGATGGCC----- mirR 25 8
-----ACACTGTCTGGTAAAGATGGCCC----- mirR 23 6
-----CTAACACTGTCTGGTAAAGATGGC----- mirR 24 4
-----CTAACACTGTCTGGTAAAGATGG----- mirR 23 3
-----CTAACACTGTCTGGTAAAG----- mirR 19 3
-----CTAACACTGTCTGGTAAAGATG----- mirR 22 2
-----CTAACACTGTCTGGTAAAGA----- mirR 20 2
-----ACACTGTCTGGTAAAGATGGC----- mirR 21 2
-----ACACTGTCTGGTAAAGATGG----- mirR 20 2
-----ACACTGTCTGGTAAAGATG----- mirR 19 2
-----ACACTGTCTGGTAAAGATGGCCCC----- mirR 24 1
-----CACTGTCTGGTAAAGATGGCCCC----- mirR 23 1
-----GGCCCCCGGGTCAGTTCCT morR 19 1

```

>mmu-mir-340

```

AATTGTA CT TGGTGTGATTATAAAGCAATGAGACTGATTGTCATATGTCGTTTGTGGGATCCGTCTCAGTTACTTTATAGCCAT species len reads
AATTGTA CT TGGTGTGAT----- morL 18 1
-----TTATAAAGCAATGAGACTGATT----- mirL 22 3660
-----TTATAAAGCAATGAGACTGAT----- mirL 21 1549
-----TTATAAAGCAATGAGACTGA----- mirL 20 1326
-----TATAAAGCAATGAGACTGATT----- mirL 21 667
-----TTATAAAGCAATGAGACTG----- mirL 19 489
-----TTATAAAGCAATGAGACTGATTG----- mirL 23 316
-----TATAAAGCAATGAGACTGAT----- mirL 20 255
-----TATAAAGCAATGAGACTGA----- mirL 19 231
-----ATTATAAAGCAATGAGACTGA----- mirL 21 185
-----TATAAAGCAATGAGACTGATTG----- mirL 22 73
-----ATTATAAAGCAATGAGACTGAT----- mirL 22 52
-----TATAAAGCAATGAGACTG----- mirL 18 43
-----ATTATAAAGCAATGAGACTGATT----- mirL 23 12
-----ATTATAAAGCAATGAGACTG----- mirL 20 9
-----ATTATAAAGCAATGAGACT----- mirL 19 7
-----ATAAAGCAATGAGACTGAT----- mirL 19 5
-----ATAAAGCAATGAGACTGATT----- mirL 20 3
-----GATTATAAAGCAATGAGAC----- mirL 19 2
-----TAAAGCAATGAGACTGAT----- mirL 18 2
-----TAAAGCAATGAGACTGATTGT----- mirL 21 1
-----ATAAAGCAATGAGACTGA----- mirL 18 1
-----ATAAAGCAATGAGACTGATTG----- mirL 21 1
-----ATTGTCATATGTCGTTTGTG----- loop 20 2

```

```

-----TGTCATATGTCGTTTGTGGGATC----- loop 23 1
-----TGTCATATGTCGTTTGTGGGAT----- loop 22 1
-----GTCATATGTCGTTTGTGGGATC----- loop 22 1
-----TTGTCATATGTCGTTTGTG----- loop 19 1
-----TGTCATATGTCGTTTGTGGGA----- loop 21 1
-----GTCATATGTCGTTTGTGGGA----- loop 20 1
-----TCCGCTCAGTTACTTTATAGCC-- mirR 23 2276
-----TCCGCTCAGTTACTTTAT----- mirR 19 825
-----TCCGCTCAGTTACTTTATAGC--- mirR 22 769
-----TCCGCTCAGTTACTTTATAG--- mirR 21 681
-----TCCGCTCAGTTACTTTATA---- mirR 20 356
-----TCCGCTCAGTTACTTTA----- mirR 18 286
-----TCCGCTCAGTTACTTTATAGCCA- mirR 24 270
-----CCGCTCAGTTACTTTATAGCC-- mirR 22 202
-----CCGCTCAGTTACTTTATAGC--- mirR 21 62
-----CCGCTCAGTTACTTTATAG--- mirR 20 38
-----CCGCTCAGTTACTTTAT----- mirR 18 32
-----CCGCTCAGTTACTTTATAGCCA- mirR 23 31
-----CCGCTCAGTTACTTTATA---- mirR 19 29
-----CGTCTCAGTTACTTTATAGCCA- mirR 22 28
-----CGTCTCAGTTACTTTATAGCC-- mirR 21 12
-----CCGCTCAGTTACTTTATAGCCAT mirR 24 8
-----ATCCGCTCAGTTACTTTATAGCC-- mirR 24 7
-----ATCCGCTCAGTTACTTTATAGC--- mirR 23 6
-----CGTCTCAGTTACTTTATAGCCAT mirR 23 4
-----GTCTCAGTTACTTTATAGCC-- mirR 20 3
-----CGTCTCAGTTACTTTATA---- mirR 18 3
-----ATCCGCTCAGTTACTTTA----- mirR 19 3
-----CGTCTCAGTTACTTTATAGC--- mirR 20 3
-----ATCCGCTCAGTTACTTTATA---- mirR 21 2
-----ATCCGCTCAGTTACTTTAT----- mirR 20 1
-----GTCTCAGTTACTTTATAGCCA- mirR 21 1
-----GTCTCAGTTACTTTATAGC--- mirR 19 1

```

>mmu-mir-379

```

TTCCATGGTTCCTGAAGAGATGGTAGACTATGGAACGTAGGCATTATGTTTTTGACCTATGTAACATGGTCCACTAACTCTC species len reads
TTCCATGGTTCCTGAAGAGAT----- morL 21 1
-----TGGTAGACTATGGAACGTAGG----- mirL 21 3065
-----TGGTAGACTATGGAACGTAGGC--- mirL 22 2672
-----TGGTAGACTATGGAACGTAG----- mirL 20 1456
-----TGGTAGACTATGGAACGTA----- mirL 19 627
-----TGGTAGACTATGGAACGT----- mirL 18 220
-----GGTAGACTATGGAACGTAGG----- mirL 20 201
-----GGTAGACTATGGAACGTAGGC--- mirL 21 159
-----GGTAGACTATGGAACGTAG----- mirL 19 64
-----GGTAGACTATGGAACGTAGGCG-- mirL 22 39

```

```

-----GGTAGACTATGGAACGTA----- mirL 18 34
-----ATGGTAGACTATGGAACGTAG----- mirL 21 19
-----ATGGTAGACTATGGAACGTA----- mirL 20 9
-----ATGGTAGACTATGGAACGTAGG----- mirL 22 7
-----ATGGTAGACTATGGAACGTAGGC----- mirL 23 6
-----ATGGTAGACTATGGAACG----- mirL 18 3
-----AGATGGTAGACTATGGAACG----- mirL 20 1
-----GATGGTAGACTATGGAACGTAG----- mirL 22 1
-----GGCGTTATGTTTTTGACC----- loop 18 5
-----TATGTAACATGGTCCACTAA----- mirR 20 1806
-----TATGTAACATGGTCCACTA----- mirR 19 1263
-----TATGTAACATGGTCCACTAAC----- mirR 21 912
-----ATGTAACATGGTCCACTAA----- mirR 19 272
-----TATGTAACATGGTCCACT----- mirR 18 249
-----TATGTAACATGGTCCACTAACT--- mirR 22 231
-----TATGTAACATGGTCCACTAACTC-- mirR 23 220
-----ATGTAACATGGTCCACTA----- mirR 18 148
-----ATGTAACATGGTCCACTAAC---- mirR 20 97
-----ATGTAACATGGTCCACTAACT--- mirR 21 57
-----ATGTAACATGGTCCACTAACTC-- mirR 22 21
-----TATGTAACATGGTCCACTAACTCTC mirR 25 4
-----TGTAACATGGTCCACTAA----- mirR 18 2
-----CTATGTAACATGGTCCACTAA----- mirR 21 1
-----ATGTAACATGGTCCACTAACTCTC mirR 24 1
-----CTATGTAACATGGTCCACTAACT--- mirR 23 1
-----GTAACATGGTCCACTAACT--- mirR 19 1
-----ATGTAACATGGTCCACTAACTCT- mirR 23 1
-----TGTAACATGGTCCACTAAC---- mirR 19 1

```

>mmu-mir-744

```

CACAGTGGGCTGGGCAAGGTGCGGGGCTAGGGCTAACAGCAGTCTTACTGACGGTTTCCTGGA AACACACACATGCTGTTGCCACTAACCTCAACCTTA species len reads
CACAGTGGGCTGGGCAAGG----- morL 19 2
CACAGTGGGCTGGGCAAG----- morL 18 1
-----TGCGGGGCTAGGGCTAACAGCA----- mirL 22 5506
-----TGCGGGGCTAGGGCTAACAGC----- mirL 21 2969
-----TGCGGGGCTAGGGCTAACAG----- mirL 20 1726
-----TGCGGGGCTAGGGCTAACAGCAG----- mirL 23 1407
-----TGCGGGGCTAGGGCTAAC----- mirL 18 769
-----GCGGGGCTAGGGCTAACAGCA----- mirL 21 246
-----GCGGGGCTAGGGCTAACAGC----- mirL 20 91
-----GCGGGGCTAGGGCTAACAGCAG----- mirL 22 82
-----GCGGGGCTAGGGCTAACAG----- mirL 19 80
-----GCGGGGCTAGGGCTAACAA----- mirL 18 22
-----GGGGCTAGGGCTAACAGCAG----- mirL 20 3
-----CGGGGCTAGGGCTAACAGCA----- mirL 20 3
-----GTGCGGGGCTAGGGCTAACAGCA----- mirL 23 2

```

```

-----CGGGGCTAGGGCTAACAG----- mirL 18 2
-----GTGCGGGGCTAGGGCTAAC----- mirL 19 2
-----GTGCGGGGCTAGGGCTAACAGC----- mirL 22 1
-----GGTGC GGGGCTAGGGCTAACAGC----- mirL 23 1
-----CGGGGCTAGGGCTAACAGC----- mirL 19 1
-----GGGCTAGGGCTAACAGCA----- mirL 19 1
-----GGTGC GGGGCTAGGGCTAACAGCA----- mirL 24 1
-----CGGGGCTAGGGCTAACAGCAG----- mirL 21 1
-----CTGTTGCCACTAACCTCAACCT-- mirR 22 181
-----CTGTTGCCACTAACCTCAAC---- mirR 20 80
-----CTGTTGCCACTAACCTCAACC--- mirR 21 65
-----CTGTTGCCACTAACCTCAA---- mirR 19 40
-----CTGTTGCCACTAACCTCA----- mirR 18 19
-----CTGTTGCCACTAACCTCAACCTT- mirR 23 13
-----TGTTGCCACTAACCTCAACCT-- mirR 21 5
-----CTGTTGCCACTAACCTCAACCTTA mirR 24 4
-----TGCTGTTGCCACTAACCTCA----- mirR 20 3
-----TGCTGTTGCCACTAACCTCAA---- mirR 21 2
-----ATGCTGTTGCCACTAACCTCAA---- mirR 22 1
-----TGCTGTTGCCACTAACCT----- mirR 18 1
-----GTTGCCACTAACCTCAAC---- mirR 18 1
-----GCTGTTGCCACTAACCTCAAC---- mirR 21 1
-----TGCTGTTGCCACTAACCTC----- mirR 19 1

```

>mmu-mir-362

| TCGAATCCTTGGAACCTAGGTGTGAATGCTGCTTCAGTGCAACACACCTGTTCAAGGATTCAAA | species | len  | reads |
|------------------------------------------------------------------|---------|------|-------|
| ---AATCCTTGGAACCTAGGTGTGA-----                                   | mirL 22 | 3519 |       |
| ---AATCCTTGGAACCTAGGTGTG-----                                    | mirL 21 | 1380 |       |
| ---AATCCTTGGAACCTAGGTGTGAA-----                                  | mirL 23 | 600  |       |
| ---AATCCTTGGAACCTAGGTGTGAATG-----                                | mirL 25 | 517  |       |
| ---AATCCTTGGAACCTAGGTGT-----                                     | mirL 20 | 438  |       |
| ---ATCCTTGGAACCTAGGTGTGA-----                                    | mirL 21 | 3    |       |
| ---ATCCTTGGAACCTAGGTGTGAATGC-----                                | mirL 25 | 1    |       |
| ---ATCCTTGGAACCTAGGTGTGAAT-----                                  | mirL 23 | 1    |       |
| TCGAATCCTTGGAACCTAGGTGTG-----                                    | mirL 24 | 1    |       |
| -----CCTTGGAACCTAGGTGTG-----                                     | mirL 18 | 1    |       |
| -----TGAATGCTGCTTCAGTGCAA-----                                   | loop 20 | 4    |       |
| -----TGAATGCTGCTTCAGTGTC-----                                    | loop 18 | 2    |       |
| -----TGAATGCTGCTTCAGTGCAAC-----                                  | loop 21 | 2    |       |
| -----GAATGCTGCTTCAGTGCAA-----                                    | loop 19 | 1    |       |
| -----AACACACCTGTTCAAGGATTCA--                                    | mirR 22 | 3468 |       |
| -----AACACACCTGTTCAAGGATTC---                                    | mirR 21 | 1833 |       |
| -----AACACACCTGTTCAAGGATTCAA-                                    | mirR 23 | 1022 |       |
| -----AACACACCTGTTCAAGGATT----                                    | mirR 20 | 258  |       |
| -----AACACACCTGTTCAAGGAT-----                                    | mirR 19 | 67   |       |
| -----AACACACCTGTTCAAGGA-----                                     | mirR 18 | 25   |       |

```

-----CAACACACCTGTTCAAGGATTC--- mirR 22 25
-----CAACACACCTGTTCAAGGATTCA-- mirR 23 7
-----AACACACCTGTTCAAGGATTCAAA mirR 24 6
-----CAACACACCTGTTCAAGGATTCAA- mirR 24 4
-----CACACCTGTTCAAGGATTC--- mirR 19 4
-----ACACACCTGTTCAAGGATTCA-- mirR 21 4
-----ACACACCTGTTCAAGGATTC--- mirR 20 4
-----CAACACACCTGTTCAAGGATT--- mirR 21 3
-----ACACCTGTTCAAGGATTCA-- mirR 19 2
-----CAACACACCTGTTCAAGGATTCAAA mirR 25 2
-----CAACACACCTGTTCAAGG----- mirR 18 2

```

>mmu-mir-98

| Sequence                                                                                                     | species | len | reads |
|--------------------------------------------------------------------------------------------------------------|---------|-----|-------|
| TAGACACATCTGCACATGCTGGGGTGAGGTAGTAAGTTGTATTGTTGTGGGGTAGGGATTTTAGGCCCCAGTAAGAAGATAACTATACAACCTTACTACTTTCCTTGG | morL    | 22  | 4     |
| TAGACACATCTGCACATGCTGG-----                                                                                  | morL    | 21  | 1     |
| -----TGAGGTAGTAAGTTGTATTGTT-----                                                                             | mirL    | 22  | 4223  |
| -----TGAGGTAGTAAGTTGTATTGT-----                                                                              | mirL    | 21  | 3157  |
| -----TGAGGTAGTAAGTTGTATTG-----                                                                               | mirL    | 20  | 1444  |
| -----TGAGGTAGTAAGTTGTATTGTTG-----                                                                            | mirL    | 23  | 1064  |
| -----TGAGGTAGTAAGTTGTATT-----                                                                                | mirL    | 19  | 715   |
| -----GAGGTAGTAAGTTGTATTGT-----                                                                               | mirL    | 20  | 107   |
| -----GAGGTAGTAAGTTGTATTGTT-----                                                                              | mirL    | 21  | 104   |
| -----GAGGTAGTAAGTTGTATTGTTG-----                                                                             | mirL    | 22  | 46    |
| -----GAGGTAGTAAGTTGTATTG-----                                                                                | mirL    | 19  | 42    |
| -----GAGGTAGTAAGTTGTATT-----                                                                                 | mirL    | 18  | 11    |
| -----AGGTAGTAAGTTGTATTGTTGT-----                                                                             | mirL    | 22  | 4     |
| -----GGTAGTAAGTTGTATTGT-----                                                                                 | mirL    | 18  | 2     |
| -----GTGAGGTAGTAAGTTGTATTGT-----                                                                             | mirL    | 22  | 1     |
| -----GTGAGGTAGTAAGTTGTA-----                                                                                 | mirL    | 18  | 1     |
| -----AGGTAGTAAGTTGTATTGTTG-----                                                                              | mirL    | 21  | 1     |
| -----GGTAGTAAGTTGTATTGTT-----                                                                                | mirL    | 19  | 1     |
| -----CTATACAACCTTACTACTTTCCT---                                                                              | mirR    | 22  | 695   |
| -----CTATACAACCTTACTACTTTC---                                                                                | mirR    | 21  | 267   |
| -----TATACAACCTTACTACTTTCCTT--                                                                               | mirR    | 22  | 191   |
| -----CTATACAACCTTACTACTTTC---                                                                                | mirR    | 20  | 147   |
| -----CTATACAACCTTACTACTTTCCTT--                                                                              | mirR    | 23  | 101   |
| -----TATACAACCTTACTACTTTCCT---                                                                               | mirR    | 21  | 71    |
| -----TATACAACCTTACTACTTTC---                                                                                 | mirR    | 19  | 57    |
| -----TATACAACCTTACTACTTTC---                                                                                 | mirR    | 20  | 57    |
| -----CTATACAACCTTACTACTT-----                                                                                | mirR    | 18  | 23    |
| -----ATACAACCTTACTACTTTCCTT--                                                                                | mirR    | 21  | 21    |
| -----CTATACAACCTTACTACTTT-----                                                                               | mirR    | 19  | 15    |
| -----TATACAACCTTACTACTTTCCTTG-                                                                               | mirR    | 23  | 14    |
| -----ATACAACCTTACTACTTTC---                                                                                  | mirR    | 19  | 11    |
| -----ACTATACAACCTTACTACTTTC---                                                                               | mirR    | 22  | 11    |

```

-----ATACAACCTACTACTTTCCT--- mirR 20 10
-----CTATACAACCTACTACTTTCCTTGG mirR 25 9
-----ATACAACCTACTACTTTC----- mirR 18 7
-----TATACAACCTACTACTTTC----- mirR 18 2
-----TATACAACCTACTACTTTCCTTGG mirR 24 2
-----TAACTATACAACCTACTA----- mirR 18 1
-----TACAACCTACTACTTTCCTT-- mirR 20 1
-----ATACAACCTACTACTTTCCTTG- mirR 22 1

```

>mmu-mir-324

```

AGAGAAGTACTATGCCTCCTCGCATCCCCCTAGGGCATTGGTGTAAGCTGGAGACCCACTGCCCCAGGTGCTGCTGGGGTTGTAGTCTGACCCAAC species len reads
AGAGAAGTACTATGCCT----- morL 18 1
-GAGAAGTACTATGCCTCCT----- morL 20 1
-GAGAAGTACTATGCCTCCT----- morL 19 1
-----CGCATCCCCCTAGGGCATTGGTGT----- mirL 23 2198
-----CGCATCCCCCTAGGGCATTGGT----- mirL 21 1642
-----CGCATCCCCCTAGGGCATTGGT----- mirL 22 1319
-----CGCATCCCCCTAGGGCATTGG----- mirL 20 1018
-----CGCATCCCCCTAGGGCATTG----- mirL 19 984
-----GCATCCCCCTAGGGCATTGGT----- mirL 21 6
-----GCATCCCCCTAGGGCATTGGTGT----- mirL 22 5
-----GCATCCCCCTAGGGCATTGGT----- mirL 20 2
-----ATCCCCCTAGGGCATTGGT----- mirL 18 1
-----CTCGCATCCCCCTAGGGCATTGGTGT----- mirL 25 1
-----TCGCATCCCCCTAGGGCATTGG----- mirL 21 1
-----TCGCATCCCCCTAGGGCATTGGTGTA----- mirL 25 1
-----ACTGCCCCAGGTGCTGCTGGG----- mirR 21 1028
-----ACTGCCCCAGGTGCTGCTGGGG----- mirR 22 936
-----ACTGCCCCAGGTGCTGCTGG----- mirR 20 613
-----ACTGCCCCAGGTGCTGCTG----- mirR 19 522
-----ACTGCCCCAGGTGCTGCTGGGG----- mirR 23 468
-----CCACTGCCCCAGGTGCTG----- mirR 19 328
-----CCACTGCCCCAGGTGCTGCTGG----- mirR 22 320
-----CCACTGCCCCAGGTGCTGCTG----- mirR 21 308
-----CCACTGCCCCAGGTGCTGCT----- mirR 20 264
-----ACTGCCCCAGGTGCTGCT----- mirR 18 197
-----CCACTGCCCCAGGTGCTGCTGGG----- mirR 23 133
-----ACTGCCCCAGGTGCTGCTGGGGT----- mirR 24 112
-----CCACTGCCCCAGGTGCTG----- mirR 18 69
-----CCACTGCCCCAGGTGCTGCTGGGG----- mirR 24 43
-----CTGCCCCAGGTGCTGCTGGGG----- mirR 21 4
-----CTGCCCCAGGTGCTGCTGGGG----- mirR 22 4
-----TGCCCCAGGTGCTGCTGGG----- mirR 19 2
-----CCCCTGCCCCAGGTGCTG----- mirR 20 2
-----CTGCCCCAGGTGCTGCTGG----- mirR 19 2
-----CACTGCCCCAGGTGCTG----- mirR 18 2

```

```

-----CACTGCCCCAGGTGCTGCTGGGG----- mirR 23 2
-----CACTGCCCCAGGTGCTGCTGGG----- mirR 22 2
-----CTGCCCCAGGTGCTGCTG----- mirR 18 2
-----CCCAGTCCCCAGGTGCTGCTGGG----- mirR 24 1
-----GCCCCAGGTGCTGCTGGGG----- mirR 19 1
-----CTGCCCCAGGTGCTGCTGGGGGT----- mirR 23 1
-----CACTGCCCCAGGTGCTGCTG----- mirR 20 1
-----GCCCCAGGTGCTGCTGGGG----- mirR 20 1
-----CACTGCCCCAGGTGCTGCTGG----- mirR 21 1
-----CCCAGTCCCCAGGTGCT----- mirR 18 1
-----GGGTTGTAGTCTGACCCAAC morR 20 1
-----GGGTTGTAGTCTGACCCA-- morR 19 1

```

>mmu-mir-223

```

TGGCCATCTGCAGTGTACGCTCCGTGTATTTGACAAGCTGAGTTGGACACTCTGTGTGGTAGAGTGTGAGTTTGTCAAATACCCCAAGTGTGGCTCATGCCTATCA species len reads
TGGCCATCTGCAGTGTAC----- morL 19 1
-----GCTCCGTGTATTTGACAAG----- mirL 19 3
-----GCTCCGTGTATTTGACAAGCT----- mirL 21 2
-----GCTCCGTGTATTTGACAA----- mirL 18 2
-----CTCCGTGTATTTGACAAG----- mirL 18 1
-----CTCCGTGTATTTGACAAGC----- mirL 19 1
-----TGTCAGTTTGTCAAATACCCCA----- mirR 22 3308
-----TGTCAGTTTGTCAAATACCCCAA----- mirR 23 3208
-----TGTCAGTTTGTCAAATACCCC----- mirR 21 2785
-----GTCAGTTTGTCAAATACCCCAA----- mirR 22 1049
-----GTCAGTTTGTCAAATACCCCA----- mirR 21 566
-----TGTCAGTTTGTCAAATACCC----- mirR 20 490
-----GTCAGTTTGTCAAATACCCC----- mirR 20 384
-----TGTCAGTTTGTCAAATACC----- mirR 19 161
-----TGTCAGTTTGTCAAATACCCCAAG----- mirR 24 142
-----TGTCAGTTTGTCAAATAC----- mirR 18 119
-----GTCAGTTTGTCAAATACCCCAAG----- mirR 23 67
-----GTCAGTTTGTCAAATACCC----- mirR 19 56
-----GTGTCAGTTTGTCAAATACCCC----- mirR 22 35
-----GTGTCAGTTTGTCAAATACCCCAA----- mirR 24 10
-----GTGTCAGTTTGTCAAATACCC----- mirR 21 6
-----GTGTCAGTTTGTCAAATACCCCA----- mirR 23 5
-----GTCAGTTTGTCAAATACC----- mirR 18 5
-----GTCAGTTTGTCAAATACCCCAAGT----- mirR 24 5
-----GTGTCAGTTTGTCAAATAC----- mirR 19 4
-----GTGTCAGTTTGTCAAATACC----- mirR 20 3
-----GTGTCAGTTTGTCAAATA----- mirR 18 3
-----CAGTTTGTCAAATACCCCA----- mirR 19 2
-----AGTGTGAGTTTGTCAAATACCCC----- mirR 23 1
-----TCAGTTTGTCAAATACCCCA----- mirR 20 1
-----TCAGTTTGTCAAATACCC----- mirR 18 1

```

```
-----AAGTGTGGCTCATGCCTA--- morR 18 2
-----AGTGTGGCTCATGCCTAT-- morR 18 1
-----AAGTGTGGCTCATGCCTATCA morR 21 1
-----AAGTGTGGCTCATGCCTAT-- morR 19 1
```

>mmu-mir-15b

```
TTGGAACCTTAAAGTACTGTAGCAGCACATCATGGTTTACATACTACAGTCAAGATGCGAATCATTATTTGCTGCTCTAGAAATTTAAGGAAATTC species len reads
TTGGAACCTTAAAGTACTG----- morL 19 1
-----TAGCAGCACATCATGGTTTAC----- mirL 21 3950
-----TAGCAGCACATCATGGTTTA----- mirL 20 3294
-----TAGCAGCACATCATGGTTT----- mirL 19 1706
-----TAGCAGCACATCATGGTTTACA----- mirL 22 1077
-----TAGCAGCACATCATGGTT----- mirL 18 423
-----AGCAGCACATCATGGTTTA----- mirL 19 313
-----AGCAGCACATCATGGTTTAC----- mirL 20 296
-----AGCAGCACATCATGGTTT----- mirL 18 110
-----AGCAGCACATCATGGTTTACA----- mirL 21 61
-----AGCAGCACATCATGGTTTACAT----- mirL 22 16
-----GCAGCACATCATGGTTTAC----- mirL 19 4
-----GTAGCAGCACATCATGGTTTA----- mirL 21 1
-----GCAGCACATCATGGTTTA----- mirL 18 1
-----CAGCACATCATGGTTTAC----- mirL 18 1
-----GTAGCAGCACATCATGGTTTAC----- mirL 22 1
-----CATACTACAGTCAAGATG----- loop 18 1
-----CGAATCATTATTTGCTGCTC----- mirR 20 262
-----CGAATCATTATTTGCTGCTCT----- mirR 21 260
-----CGAATCATTATTTGCTGCT----- mirR 19 210
-----CGAATCATTATTTGCTGCTCTA----- mirR 22 194
-----CGAATCATTATTTGCTGCTCTAG----- mirR 23 62
-----CGAATCATTATTTGCTGCTC----- mirR 18 24
-----GCGAATCATTATTTGCTGCT----- mirR 20 8
-----TGCGAATCATTATTTGCTGCT----- mirR 21 8
-----GCGAATCATTATTTGCTGCTC----- mirR 21 6
-----CGAATCATTATTTGCTGCTCTAGA----- mirR 24 6
-----TGCGAATCATTATTTGCTGCTC----- mirR 22 4
-----GAATCATTATTTGCTGCT----- mirR 18 1
-----GAATCATTATTTGCTGCTCT----- mirR 20 1
-----AGAAATTTAAGGAAATTC morR 18 1
```

>mmu-mir-190

```
GCCTTTTCTGCAGGCCTCTGTGTGATATGTTTATATATTAGGTTGTTATTTAATCCAATATATATCAAGCATATTCCTACAGTGTCTTGCCCTGTCTCCG species len reads
-CCTTTTCTGCAGGCCTCT----- morL 18 12
GCCTTTTCTGCAGGCCTCT----- morL 19 1
-CCTTTTCTGCAGGCCTCT----- morL 19 1
-----TGATATGTTTATATATTAGGTT----- mirL 23 4463
-----TGATATGTTTATATATTAGGTT----- mirL 22 1996
```



```

-----TGATATGTTTGATATATTAG----- mirL 20 1373
-----TGATATGTTTGATATATTAGTTG----- mirL 24 1260
-----TGATATGTTTGATATATTA----- mirL 19 747
-----GATATGTTTGATATATTAGTT----- mirL 22 298
-----GATATGTTTGATATATTAGTT----- mirL 21 118
-----GATATGTTTGATATATTAGTTG----- mirL 23 111
-----GATATGTTTGATATATTAG----- mirL 19 36
-----GATATGTTTGATATATTAG----- mirL 20 15
-----TATGTTTGATATATTAGTT----- mirL 20 4
-----ATATGTTTGATATATTAGTT----- mirL 21 1
-----TATGTTTGATATATTAGTTGT----- mirL 22 1
-----ATATGTTTGATATATTAGTTG----- mirL 22 1
-----GTGATATGTTTGATATATTA----- mirL 20 1
-----ACTATATATCAAGCATATTCCCT----- mirR 22 705
-----CTATATATCAAGCATATTCCCT----- mirR 21 159
-----ACTATATATCAAGCATATTCC----- mirR 21 106
-----ACTATATATCAAGCATATTCCCTAC----- mirR 24 87
-----CTATATATCAAGCATATTCCCTAC----- mirR 23 87
-----ACTATATATCAAGCATATTCCCTA----- mirR 23 46
-----ACTATATATCAAGCATATTCC----- mirR 20 45
-----CTATATATCAAGCATATTCC----- mirR 20 40
-----CTATATATCAAGCATATTCCCTA----- mirR 22 33
-----ACTATATATCAAGCATATT----- mirR 19 33
-----ACTATATATCAAGCATAT----- mirR 18 32
-----CTATATATCAAGCATATTCC----- mirR 19 12
-----CTATATATCAAGCATATTCCCTACA----- mirR 24 6
-----CTATATATCAAGCATATT----- mirR 18 5
-----TATATATCAAGCATATTCCCT----- mirR 20 1
-----ATATATCAAGCATATTCCCT----- mirR 19 1
-----AACTATATATCAAGCATATTCC----- mirR 22 1
-----CAGTGTCTTGCCCTGTCTCCG morR 21 1

```

>mmu-mir-350

```

TGCCTTGCTCCTACAAGAGTAAAGTGCATGCGCTTTGGGACAGTGAGGAAAATAATGTTTCACAAAGCCCATACACTTTCACCC species len reads
TGCCTTGCTCCTACAAGAGTAA----- morL 22 1
-----AAAGTGCATGCGCTTTGGGA----- mirL 20 7
-----AAAGTGCATGCGCTTTGGG----- mirL 19 1
-----ACAGTGAGGAAAATAATG----- loop 18 1
-----TTCACAAAGCCCATACACTTTC----- mirR 22 6102
-----TTCACAAAGCCCATACACTTTC----- mirR 21 1496
-----TTCACAAAGCCCATACACTTTC----- mirR 23 1017
-----TTCACAAAGCCCATACACTTTCAC----- mirR 25 708
-----TTCACAAAGCCCATACAC----- mirR 18 541
-----TTCACAAAGCCCATACACTTTC----- mirR 21 477
-----TTCACAAAGCCCATACACTTTCAC----- mirR 23 363
-----TTCACAAAGCCCATACACTTTCAC----- mirR 24 330

```

```

-----TTCACAAAGCCCATACTT----- mirR 20 263
-----TCACAAAGCCCATACTT----- mirR 20 200
-----TCACAAAGCCCATACTTCA--- mirR 22 123
-----TCACAAAGCCCATACTT----- mirR 19 38
-----TCACAAAGCCCATACTTTCACC- mirR 24 8
-----ACAAAGCCCATACTTTCACC- mirR 22 7
-----TCACAAAGCCCATACT----- mirR 18 6
-----GTTTACAAAGCCCATACTTTC--- mirR 23 6
-----ACAAAGCCCATACTTTC--- mirR 20 3
-----ACAAAGCCCATACTTTC--- mirR 19 2
-----ATGTTTACAAAGCCCATACTTTC--- mirR 26 1
-----ACAAAGCCCATACTTTCACCC mirR 23 1
-----ACAAAGCCCATACTTTCAC-- mirR 21 1
-----ACAAAGCCCATACTT----- mirR 18 1
-----CACAAAGCCCATACTTTCAC-- mirR 22 1

```

>mmu-mir-485

```

TGATCATGTGTGATACTTGGAGAGAGGCTGGCCGTGATGAATTCGATTCATCTAAACGAGTCATACACGGCTCTCCTCTCTTCTAGTGTCAAACCTCTGC species len reads
---CATGTGTGATACTTGGAG----- morL 18 2
--ATCATGTGTGATACTTGGAG----- morL 20 2
TGATCATGTGTGATACTTGGAG----- morL 21 1
-----AGAGGCTGGCCGTGATGAATTC----- mirL 22 334
-----AGAGGCTGGCCGTGATGAAT----- mirL 20 96
-----AGAGGCTGGCCGTGATGAATT----- mirL 21 71
-----AGAGGCTGGCCGTGATGAATTCG----- mirL 23 40
-----AGAGGCTGGCCGTGATGAA----- mirL 19 31
-----AGGCTGGCCGTGATGAATTCGA----- mirL 22 22
-----AGAGAGGCTGGCCGTGATGA----- mirL 20 16
-----AGAGAGGCTGGCCGTGATGAAT----- mirL 22 16
-----AGGCTGGCCGTGATGAATTC----- mirL 20 15
-----AGGCTGGCCGTGATGAATTCG----- mirL 21 15
-----AGGCTGGCCGTGATGAATTCGAT----- mirL 23 12
-----AGAGAGGCTGGCCGTGATGAA----- mirL 21 10
-----AGAGAGGCTGGCCGTGATGAATTC----- mirL 24 6
-----AGGCTGGCCGTGATGAATT----- mirL 19 5
-----AGAGAGGCTGGCCGTGAT----- mirL 18 4
-----GGCTGGCCGTGATGAATTCG----- mirL 20 1
-----GAGGCTGGCCGTGATGAATTCG----- mirL 22 1
-----TCGATTCATCTAAACGAGTC----- loop 20 177
-----TTCGATTCATCTAAACGAGTC----- loop 21 15
-----TCGATTCATCTAAACGAGTCAT----- loop 22 8
-----TCGATTCATCTAAACGAGTCA----- loop 21 3
-----TTCGATTCATCTAAACGAGTCA----- loop 22 1
-----TCGATTCATCTAAACGAG----- loop 18 1
-----CGATTCATCTAAACGAGTCAT----- loop 21 1
-----CATACACGGCTCTCCTCTCTTC----- mirR 22 5992

```

```

-----CATACACGGCTCTCCTCTC----- mirR 19 940
-----GTCATACACGGCTCTCCTCTCT----- mirR 22 874
-----CATACACGGCTCTCCTCTCTT----- mirR 21 866
-----CATACACGGCTCTCCTCTCT----- mirR 20 273
-----GTCATACACGGCTCTCCTCTC----- mirR 21 273
-----CATACACGGCTCTCCTCTCTTCT----- mirR 23 252
-----CATACACGGCTCTCCTCTC----- mirR 18 238
-----GTCATACACGGCTCTCCTC----- mirR 19 138
-----GTCATACACGGCTCTCCTCT----- mirR 20 123
-----AGTCATACACGGCTCTCCTCTC----- mirR 22 113
-----TCATACACGGCTCTCCTCTCTTCT----- mirR 23 91
-----ATACACGGCTCTCCTCTCTTCT----- mirR 21 88
-----GTCATACACGGCTCTCCTCTCTT----- mirR 23 75
-----GTCATACACGGCTCTCCTCTCTTCT----- mirR 24 69
-----AGTCATACACGGCTCTCCTCTCT----- mirR 23 51
-----CATACACGGCTCTCCTCTCTTCTA----- mirR 24 44
-----GTCATACACGGCTCTCCT----- mirR 18 40
-----ATACACGGCTCTCCTCTCTTCT----- mirR 22 36
-----AGTCATACACGGCTCTCCT----- mirR 18 34
-----TCATACACGGCTCTCCTCTC----- mirR 20 29
-----TCATACACGGCTCTCCTC----- mirR 18 25
-----AGTCATACACGGCTCTCCT----- mirR 19 18
-----AGTCATACACGGCTCTCCTC----- mirR 20 17
-----AGTCATACACGGCTCTCCTCT----- mirR 21 17
-----ATACACGGCTCTCCTCTCTT----- mirR 20 14
-----ATACACGGCTCTCCTCTC----- mirR 18 11
-----AGTCATACACGGCTCTCCTCTCTT----- mirR 24 11
-----TCATACACGGCTCTCCTCT----- mirR 19 9
-----TCATACACGGCTCTCCTCTCTT----- mirR 22 7
-----TCATACACGGCTCTCCTCTCTTCT----- mirR 24 6
-----TCATACACGGCTCTCCTCTCT----- mirR 21 6
-----ATACACGGCTCTCCTCTCT----- mirR 19 5
-----TACACGGCTCTCCTCTCTTCT----- mirR 20 3
-----ACACGGCTCTCCTCTCTTCT----- mirR 19 3
-----ATACACGGCTCTCCTCTCTTCTAGT----- mirR 25 1
-----TCTAGTGTCAAACCTCTGC morR 18 1

```

>mmu-mir-339

```

AGCTGGACGGGGTGGCCACTATCCCTGTCTCCAGGAGCTCACGTATGCCTGCCTGTGAGCGCCTCGGCGACAGAGCCGGTGTCCACCCCTGCACTGTCCACAGACCCTTGCC species len reads
AGCTGGACGGGGTGGCCACTAT----- morL 22 3
AGCTGGACGGGGTGGCCACT----- morL 20 2
AGCTGGACGGGGTGGCCACTATC----- morL 23 1
AGCTGGACGGGGTGGCCACTA----- morL 21 1
-----TCCCTGTCTCCAGGAGCTCA----- mirL 21 3215
-----TCCCTGTCTCCAGGAGCTC----- mirL 20 3190
-----TCCCTGTCTCCAGGAGCTCAC----- mirL 22 2808

```

```

-----TCCCTGTCCTCCAGGAGCT----- mirL 19 977
-----TCCCTGTCCTCCAGGAGCTCACG----- mirL 23 455
-----CCCTGTCCTCCAGGAGCTCA----- mirL 20 148
-----CCCTGTCCTCCAGGAGCTC----- mirL 19 103
-----ATCCCTGTCCTCCAGGAGCTCAC----- mirL 23 70
-----CCCTGTCCTCCAGGAGCTCAC----- mirL 21 69
-----ATCCCTGTCCTCCAGGAGCTCA----- mirL 22 37
-----ATCCCTGTCCTCCAGGAGCTC----- mirL 21 29
-----CCCTGTCCTCCAGGAGCTCACG----- mirL 22 26
-----CCCTGTCCTCCAGGAGCT----- mirL 18 18
-----ATCCCTGTCCTCCAGGAGCT----- mirL 20 15
-----ATCCCTGTCCTCCAGGAGC----- mirL 19 12
-----CCTGTCCTCCAGGAGCTCACGT----- mirL 22 1
-----CCTGTCCTCCAGGAGCTC----- mirL 18 1
-----TGAGCGCCTCGGCGACAGAGCC----- mirR 22 49
-----TGAGCGCCTCGGCGACAGAG----- mirR 20 44
-----TGAGCGCCTCGGCGACAGAGC----- mirR 21 43
-----AGCGCCTCGGCGACAGAGC----- mirR 19 39
-----TGAGCGCCTCGGCGACAGA----- mirR 19 32
-----AGCGCCTCGGCGACAGAGCCG----- mirR 21 28
-----AGCGCCTCGGCGACAGAGCCGG----- mirR 22 23
-----AGCGCCTCGGCGACAGAGCC----- mirR 20 19
-----TGAGCGCCTCGGCGACAG----- mirR 18 18
-----TGAGCGCCTCGGCGACAGAGCCG----- mirR 23 13
-----GAGCGCCTCGGCGACAGAGC----- mirR 20 9
-----AGCGCCTCGGCGACAGAGCCGGT----- mirR 23 8
-----TGAGCGCCTCGGCGACAGAGCCGG----- mirR 24 6
-----GAGCGCCTCGGCGACAGAGCCGG----- mirR 23 6
-----GAGCGCCTCGGCGACAGAGCC----- mirR 21 4
-----GAGCGCCTCGGCGACAGAGCCG----- mirR 22 4
-----GAGCGCCTCGGCGACAGAGCCGGT----- mirR 24 2
-----GAGCGCCTCGGCGACAGAG----- mirR 19 2
-----AGCGCCTCGGCGACAGAG----- mirR 18 2
-----AGCGCCTCGGCGACAGAGCCGGTG----- mirR 24 1
-----GGTGTCCACCCCTGCACT----- morR 18 1
-----GTGTCCACCCCTGCACTGTCCACAGACCCTTGCC morR 34 1

```

>mmu-mir-25

```

AGGCGGAGACTTGGGCAATTGCTGGACGCTGCCCTGGGCATTGCACTTGTCTCGGTCTGACAGTGCCGGCCCAACAC species len reads
AGGCGGAGACTTGGGCAATTGC----- mirL 22 27
AGGCGGAGACTTGGGCAATT----- mirL 20 7
AGGCGGAGACTTGGGCAATTGCT----- mirL 23 6
AGGCGGAGACTTGGGCAAT----- mirL 19 3
AGGCGGAGACTTGGGCAATTG----- mirL 21 3
-----CATTGCACTTGTCTCGGTCT----- mirR 20 5135
-----CATTGCACTTGTCTCGGTCTGA----- mirR 22 1825

```

```

-----CATTGCACTTGTCTCGGTCTG----- mirR 21 1600
-----CATTGCACTTGTCTCGGTCTGAC----- mirR 23 1494
-----CATTGCACTTGTCTCGGTC----- mirR 19 881
-----CATTGCACTTGTCTCGGT----- mirR 18 174
-----CATTGCACTTGTCTCGGTCTGACA----- mirR 24 89
-----ATTGCACTTGTCTCGGTCTGA----- mirR 21 11
-----ATTGCACTTGTCTCGGTCT----- mirR 19 11
-----ATTGCACTTGTCTCGGTCTG----- mirR 20 6
-----ATTGCACTTGTCTCGGTCTGAC----- mirR 22 4
-----ATTGCACTTGTCTCGGTC----- mirR 18 4
-----GCATTGCACTTGTCTCGGTCT----- mirR 21 3
-----GCATTGCACTTGTCTCGGTCTGA----- mirR 23 1
-----TGCATTGTCTCGGTCTGAC----- mirR 20 1
-----TGACAGTGCCGGCCCAACAC morR 20 2

```

>mmu-mir-410

```

GTCAAACTGGGTACTTGAGGAGAGGTTGTCTGTGATGAGTTCGCTTTATTAATGACGAATATAACACAGATGGCCTGTTTTCAATACCACCTG species len reads
GTCAAACTGGGTACTTGAGGA----- morL 22 2
-----AGGTTGTCTGTGATGAGTTCG----- mirL 21 31
-----AGGTTGTCTGTGATGAGTTCG----- mirL 22 21
-----AGGTTGTCTGTGATGAGTTC----- mirL 20 15
-----AGGTTGTCTGTGATGAGTT----- mirL 19 6
-----AGGTTGTCTGTGATGAGT----- mirL 18 1
-----GTTGTCTGTGATGAGTTC----- mirL 18 1
-----AATATAACACAGATGGCCTGT----- mirR 21 6628
-----AATATAACACAGATGGCCTGTT----- mirR 22 1269
-----AATATAACACAGATGGCC----- mirR 18 977
-----AATATAACACAGATGGCCTG----- mirR 20 862
-----AATATAACACAGATGGCCTGTTT----- mirR 23 712
-----AATATAACACAGATGGCCT----- mirR 19 504
-----TATAACACAGATGGCCTGTTT----- mirR 21 72
-----ATATAACACAGATGGCCTGTTT----- mirR 22 55
-----ATAACACAGATGGCCTGTTT----- mirR 20 16
-----AATATAACACAGATGGCCTGTTTTC----- mirR 25 13
-----TATAACACAGATGGCCTGTT----- mirR 20 9
-----ATAACACAGATGGCCTGTT----- mirR 19 7
-----ATATAACACAGATGGCCTGT----- mirR 20 6
-----TATAACACAGATGGCCTGT----- mirR 19 5
-----GAATATAACACAGATGGCCTGT----- mirR 22 5
-----TATAACACAGATGGCCTGTTTT----- mirR 22 4
-----CGAATATAACACAGATGGCC----- mirR 20 3
-----TATAACACAGATGGCCTGTTTTC----- mirR 23 2
-----ATATAACACAGATGGCCTG----- mirR 19 2
-----TATAACACAGATGGCCTG----- mirR 18 2
-----ATAACACAGATGGCCTGT----- mirR 18 2
-----ATATAACACAGATGGCCT----- mirR 18 2

```

```

-----ATAACACAGATGGCCTGTTTT----- mirR 21 2
-----ATATAACACAGATGGCCTGTT----- mirR 21 2
-----CGAATATAACACAGATGGCCTGT----- mirR 23 2
-----GAATATAACACAGATGGCCTG----- mirR 21 1
-----CGAATATAACACAGATGGCCT----- mirR 21 1
-----GAATATAACACAGATGGCCTGTT----- mirR 23 1
-----GAATATAACACAGATGGCCT----- mirR 20 1
-----ATATAACACAGATGGCCTGTTTT----- mirR 23 1
-----CGAATATAACACAGATGG----- mirR 18 1
-----GAATATAACACAGATGGCCTGTTT----- mirR 24 1
-----GAATATAACACAGATGGCC----- mirR 19 1
-----TGTTTTCAATACCACCTG morR 18 1

```

>mmu-mir-380

| Sequence                                                                         | species | len | reads |
|----------------------------------------------------------------------------------|---------|-----|-------|
| AAGATGGTTGACCATAGAACATGCGCTACTTCTGTGTCGTATGTAGTATGGTCCACATCTTCTCGTTATCAAAGTCATTC | mirL    | 21  | 260   |
| ---ATGGTTGACCATAGAACATGC-----                                                    | mirL    | 23  | 103   |
| ---ATGGTTGACCATAGAACATGCG-----                                                   | mirL    | 22  | 83    |
| ---ATGGTTGACCATAGAACATG-----                                                     | mirL    | 20  | 49    |
| ---ATGGTTGACCATAGAACAT-----                                                      | mirL    | 19  | 36    |
| ----GGTTGACCATAGAACATGCG-----                                                    | mirL    | 20  | 2     |
| ----GGTTGACCATAGAACATGC-----                                                     | mirL    | 19  | 2     |
| ----GTTGACCATAGAACATGCGC-----                                                    | mirL    | 20  | 1     |
| AAGATGGTTGACCATAGAAC-----                                                        | mirL    | 20  | 1     |
| ----GGTTGACCATAGAACATGCGC-----                                                   | mirL    | 21  | 1     |
| ----TGGTTGACCATAGAACATGCG-----                                                   | mirL    | 21  | 1     |
| ----TGGTTGACCATAGAACATGC-----                                                    | mirL    | 20  | 1     |
| ----GTTGACCATAGAACATGCG-----                                                     | mirL    | 19  | 1     |
| -----GCGCTACTTCTGTGTCGTAT-----                                                   | loop    | 20  | 1     |
| -----TATGTAGTATGGTCCACATCT-----                                                  | mirR    | 21  | 4701  |
| -----TATGTAGTATGGTCCACAT-----                                                    | mirR    | 19  | 1820  |
| -----TATGTAGTATGGTCCACATCTTC-----                                                | mirR    | 23  | 1002  |
| -----TATGTAGTATGGTCCACATC-----                                                   | mirR    | 20  | 981   |
| -----TATGTAGTATGGTCCACATCTT-----                                                 | mirR    | 22  | 807   |
| -----ATGTAGTATGGTCCACATCT-----                                                   | mirR    | 20  | 371   |
| -----TATGTAGTATGGTCCACA-----                                                     | mirR    | 18  | 223   |
| -----ATGTAGTATGGTCCACATCTT-----                                                  | mirR    | 21  | 131   |
| -----ATGTAGTATGGTCCACAT-----                                                     | mirR    | 18  | 124   |
| -----ATGTAGTATGGTCCACATC-----                                                    | mirR    | 19  | 108   |
| -----ATGTAGTATGGTCCACATCTTC-----                                                 | mirR    | 22  | 25    |
| -----TATGTAGTATGGTCCACATCTTCT-----                                               | mirR    | 24  | 18    |
| -----TGTAGTATGGTCCACATCT-----                                                    | mirR    | 19  | 6     |
| -----GTATGTAGTATGGTCCACATC-----                                                  | mirR    | 21  | 2     |
| -----GTATGTAGTATGGTCCACATCT-----                                                 | mirR    | 22  | 2     |
| -----GTATGTAGTATGGTCCACATCTT-----                                                | mirR    | 23  | 2     |
| -----GTATGTAGTATGGTCCAC-----                                                     | mirR    | 18  | 1     |

```

-----GTAGTATGGTCCACATCT----- mirR 18 1
-----ATGTAGTATGGTCCACATCTTCTC----- mirR 24 1
-----TGTAGTATGGTCCACATCTTC----- mirR 21 1
-----ATGTAGTATGGTCCACATCTTCT----- mirR 23 1
-----TCTTCTCGTTATCAAAGTC----- morR 19 2
-----CTCGTTATCAAAGTCATTC----- morR 19 1
-----CTTCTCGTTATCAAAGTC----- morR 18 1

```

>mmu-mir-674

| CTAGTCATCACCCCTGAGCCTTGCACTGAGATGGGAGTGGTGTAAAGGCTCAGGTATGCACAGCTCCCATCTCAGAACAAGGCTCGGGTGTGCTCAGCTCCCA | species | len | reads |
|---------------------------------------------------------------------------------------------------------|---------|-----|-------|
| CTAGTCATCACCCCTGAGCC-----                                                                               | morL    | 19  | 1     |
| --AGTCATCACCCCTGAGCCTT-----                                                                             | morL    | 19  | 1     |
| -TAGTCATCACCCCTGAGCCTT-----                                                                             | morL    | 20  | 1     |
| -----GCACTGAGATGGGAGTGGTGT-----                                                                         | mirL    | 21  | 2105  |
| -----GCACTGAGATGGGAGTGGTGTA-----                                                                        | mirL    | 22  | 1446  |
| -----GCACTGAGATGGGAGTGGTG-----                                                                          | mirL    | 20  | 1024  |
| -----GCACTGAGATGGGAGTGGTGTA-----                                                                        | mirL    | 23  | 866   |
| -----GCACTGAGATGGGAGTGGT-----                                                                           | mirL    | 19  | 385   |
| -----TGCACCTGAGATGGGAGTGGTGT-----                                                                       | mirL    | 22  | 87    |
| -----TGCACCTGAGATGGGAGTGGTG-----                                                                        | mirL    | 21  | 57    |
| -----CACTGAGATGGGAGTGGTGT-----                                                                          | mirL    | 20  | 29    |
| -----TGCACCTGAGATGGGAGTGGTGTA-----                                                                      | mirL    | 23  | 29    |
| -----CACTGAGATGGGAGTGGTGTA-----                                                                         | mirL    | 21  | 26    |
| -----TGCACCTGAGATGGGAGTGGT-----                                                                         | mirL    | 20  | 18    |
| -----CACTGAGATGGGAGTGGTGTA-----                                                                         | mirL    | 22  | 16    |
| -----CACTGAGATGGGAGTGGTG-----                                                                           | mirL    | 19  | 13    |
| -----TGCACCTGAGATGGGAGTG-----                                                                           | mirL    | 18  | 12    |
| -----CACTGAGATGGGAGTGGT-----                                                                            | mirL    | 18  | 4     |
| -----ACTGAGATGGGAGTGGTGTA-----                                                                          | mirL    | 20  | 3     |
| -----CTGAGATGGGAGTGGTGT-----                                                                            | mirL    | 18  | 2     |
| -----TTGCACCTGAGATGGGAGTGGTGTA-----                                                                     | mirL    | 24  | 1     |
| -----CTGAGATGGGAGTGGTGTAAGGC-----                                                                       | mirL    | 23  | 1     |
| -----ACTGAGATGGGAGTGGTGTA-----                                                                          | mirL    | 21  | 1     |
| -----CTGAGATGGGAGTGGTGTA-----                                                                           | mirL    | 19  | 1     |
| -----CACAGCTCCCATCTCAGAACA-----                                                                         | mirR    | 22  | 1994  |
| -----CACAGCTCCCATCTCAGAACA-----                                                                         | mirR    | 21  | 976   |
| -----CACAGCTCCCATCTCAGAAC-----                                                                          | mirR    | 20  | 857   |
| -----CACAGCTCCCATCTCAGAA-----                                                                           | mirR    | 19  | 184   |
| -----CACAGCTCCCATCTCAGAACAAG-----                                                                       | mirR    | 23  | 147   |
| -----CACAGCTCCCATCTCAGA-----                                                                            | mirR    | 18  | 125   |
| -----ACAGCTCCCATCTCAGAACA-----                                                                          | mirR    | 21  | 42    |
| -----CACAGCTCCCATCTCAGAACAAGGC-----                                                                     | mirR    | 25  | 21    |
| -----ACAGCTCCCATCTCAGAACA-----                                                                          | mirR    | 20  | 16    |
| -----ACAGCTCCCATCTCAGAAC-----                                                                           | mirR    | 19  | 16    |
| -----ACAGCTCCCATCTCAGAACAAG-----                                                                        | mirR    | 22  | 4     |
| -----GCACAGCTCCCATCTCAGAACA-----                                                                        | mirR    | 23  | 3     |

```

-----ACAGCTCCCATCTCAGAACAAGG----- mirR 23 1
-----CAGCTCCCATCTCAGAACAA----- mirR 20 1
-----GCACAGCTCCCATCTCAGA----- mirR 19 1
-----TCGGGTGTGCTCAGCTCC-- morR 18 1
-----TCGGGTGTGCTCAGCTCCCA morR 20 1

```

>mmu-mir-370

| Sequence                                                                           | species | len | reads |
|------------------------------------------------------------------------------------|---------|-----|-------|
| GAGACCAGGTCACGTCTCTGCAGTTACACAGCTCATGAGTGCCTGCTGGGGTGGAACTGGTTTGTCTGTCTGTCTGTCCACC | mirL    | 20  | 502   |
| -AGACCAGGTCACGTCTCTGC-                                                             | mirL    | 22  | 343   |
| -AGACCAGGTCACGTCTCTGCAG-                                                           | mirL    | 21  | 254   |
| -AGACCAGGTCACGTCTCTGCA-                                                            | mirL    | 21  | 226   |
| ---CCAGGTCACGTCTCTGCAGTT                                                           | mirL    | 23  | 188   |
| -AGACCAGGTCACGTCTCTGCAGT-                                                          | mirL    | 22  | 65    |
| ---CCAGGTCACGTCTCTGCAGTTA-                                                         | mirL    | 23  | 60    |
| ---CCAGGTCACGTCTCTGCAGTTAC-                                                        | mirL    | 19  | 58    |
| -AGACCAGGTCACGTCTCTG-                                                              | mirL    | 19  | 33    |
| ---CCAGGTCACGTCTCTGCAG-                                                            | mirL    | 20  | 28    |
| ---CCAGGTCACGTCTCTGCAGT-                                                           | mirL    | 18  | 2     |
| GAGACCAGGTCACGTCTC-                                                                | mirL    | 23  | 2     |
| --GACCAGGTCACGTCTCTGCAGTT                                                          | mirL    | 19  | 1     |
| --GACCAGGTCACGTCTCTGC-                                                             | mirL    | 18  | 1     |
| --GACCAGGTCACGTCTCTG-                                                              | mirL    | 21  | 1     |
| GAGACCAGGTCACGTCTCTGC-                                                             | mirL    | 22  | 1     |
| --GACCAGGTCACGTCTCTGCAGT                                                           | mirL    | 21  | 1     |
| ---ACCAGGTCACGTCTCTGCAGT-                                                          | loop    | 19  | 2     |
| -----TACACAGCTCATGAGTGCC-----                                                      | loop    | 18  | 1     |
| -----GCAGTTACACAGCTCATG-----                                                       | loop    | 19  | 1     |
| -----TTACACAGCTCATGAGTGCC-----                                                     | mirR    | 22  | 2552  |
| -----GCCTGCTGGGGTGGAACTGGT-----                                                    | mirR    | 23  | 2459  |
| -----GCCTGCTGGGGTGGAACTGGTT-----                                                   | mirR    | 21  | 1041  |
| -----GCCTGCTGGGGTGGAACTGG-----                                                     | mirR    | 20  | 398   |
| -----GCCTGCTGGGGTGGAACTG-----                                                      | mirR    | 18  | 331   |
| -----GCCTGCTGGGGTGGAACT-----                                                       | mirR    | 19  | 297   |
| -----GCCTGCTGGGGTGGAACTGGTT-----                                                   | mirR    | 24  | 294   |
| -----CCTGCTGGGGTGGAACTGGTT-----                                                    | mirR    | 22  | 293   |
| -----CCTGCTGGGGTGGAACTGGTTT-----                                                   | mirR    | 23  | 115   |
| -----TGCTGCTGGGGTGGAACTGG-----                                                     | mirR    | 22  | 104   |
| -----CCTGCTGGGGTGGAACTGGT-----                                                     | mirR    | 21  | 99    |
| -----CTGCTGGGGTGGAACTGGTT-----                                                     | mirR    | 21  | 87    |
| -----CTGCTGGGGTGGAACTGGTTT-----                                                    | mirR    | 22  | 81    |
| -----CTGCTGGGGTGGAACTGG-----                                                       | mirR    | 20  | 63    |
| -----TGCCTGCTGGGGTGGAACTGGT-----                                                   | mirR    | 23  | 49    |
| -----CTGCTGGGGTGGAACTGGTTT-----                                                    | mirR    | 23  | 42    |
| -----CCTGCTGGGGTGGAACTG-----                                                       | mirR    | 19  | 39    |
| -----TGCCTGCTGGGGTGGAACT-----                                                      | mirR    | 19  | 36    |



```

-----TGCCTGCTGGGGTGGAACT----- mirR 20 35
-----TGCCTGCTGGGGTGGAACTG----- mirR 21 34
-----CCTGCTGGGGTGGAACTGGTTT----- mirR 24 29
-----TGCCTGCTGGGGTGGAACTGGTT----- mirR 24 26
-----CCTGCTGGGGTGGAACT----- mirR 18 22
-----TGCCTGCTGGGGTGGAACT----- mirR 18 15
-----CTGCTGGGGTGGAACTGGT----- mirR 20 12
-----CTGCTGGGGTGGAACTGG----- mirR 19 11
-----CTGCTGGGGTGGAACTG----- mirR 18 9
-----TGCTGGGGTGGAACTGGTT----- mirR 20 2
-----TGCTGGGGTGGAACTGGTTT----- mirR 22 2
-----TGCTGGGGTGGAACTGG----- mirR 18 1
-----GTGCCTGCTGGGGTGGAACTGGT----- mirR 24 1
-----CTGCTGGGGTGGAACTGGTTTGT----- mirR 25 1
-----AGTGCCTGCTGGGGTGGAACTGGT----- mirR 25 1
-----TTGTCTGTCTGTCTGTCTGTC--- morR 18 3
-----GGTTTGTCTGTCTGTCTGTCTGTC--- morR 20 1
-----TGCTGTCTGTCTGTCTGTCTGTCTGTCAC- morR 18 1
-----TTGTCTGTCTGTCTGTCTGTCTGTCTGTCAC morR 20 1
-----GGTTTGTCTGTCTGTCTGTCTGTCTGTCAC-- morR 21 1

```

>mmu-mir-211

```

CCTGTGACCTGTGGGCTTCCCTTTGTCATCCTTTGCCTAGGCCTCTGAGTGAGGCAAGGACAGCAAAGGGGGGCTCAGTGGTCACCTCTACTGCAGAGAGTTC species len reads
-CGTGTGACCTGTGGGCTTC----- morL 18 2
CCTGTGACCTGTGGGCTT----- morL 18 1
-----TTCCCTTTGTCATCCTTTG----- mirL 19 2876
-----TTCCCTTTGTCATCCTTTGCCT----- mirL 22 2054
-----TTCCCTTTGTCATCCTTTGC----- mirL 20 1859
-----TTCCCTTTGTCATCCTTTGCCTA----- mirL 23 1524
-----TTCCCTTTGTCATCCTTT----- mirL 18 1457
-----TCCCTTTGTCATCCTTTG----- mirL 18 182
-----TCCCTTTGTCATCCTTTGCCT----- mirL 21 134
-----TCCCTTTGTCATCCTTTGC----- mirL 19 128
-----TCCCTTTGTCATCCTTTGCCTA----- mirL 22 92
-----TCCCTTTGTCATCCTTTGCC----- mirL 20 39
-----CCCTTTGTCATCCTTTGCCTA----- mirL 21 3
-----CCCTTTGTCATCCTTTGCCT----- mirL 20 1
-----CTTCCCTTTGTCATCCTTT----- mirL 19 1
-----CCTTTGTCATCCTTTGCCT----- mirL 19 1
-----CTCTACTGCAGAGAGTTC mirR 18 1

```

>mmu-mir-664

```

GCTGGCTGGGGAAAATGACTGGATAGAAAACATTATTCTATTCTACTTCCCCAGCCTACACATGAAAGCAATAACAGCACAAAT species len reads
-CTGGCTGGGGAAAATGACTGGA----- mirL 22 39
-CTGGCTGGGGAAAATGACTGG----- mirL 21 30
-CTGGCTGGGGAAAATGACTGGAT----- mirL 23 22

```

```
GCTGGCTGGGGAAAATGACTGG----- mirL 22 17
GCTGGCTGGGGAAAATGACTGGAT----- mirL 24 7
-CTGGCTGGGGAAAATGACT----- mirL 19 6
-CTGGCTGGGGAAAATGAC----- mirL 18 6
GCTGGCTGGGGAAAATGACTGGA----- mirL 23 5
GCTGGCTGGGGAAAATGACT----- mirL 20 4
GCTGGCTGGGGAAAATGAC----- mirL 19 3
--GGCTGGGGAAAATGACTG----- mirL 18 2
--TGGCTGGGGAAAATGACTGGATA----- mirL 23 1
--TGGCTGGGGAAAATGACTGG----- mirL 20 1
---GGCTGGGGAAAATGACTGG----- mirL 19 1
-----TATTCATTTACTCCCCAGCCTAC----- mirR 23 4156
-----TATTCATTTACTCCCCAGCCTA----- mirR 22 1502
-----TATTCATTTACTCCCCAGCCT----- mirR 21 1351
-----TATTCATTTACTCCCCAGCCTACA----- mirR 24 1067
-----ATTCATTTACTCCCCAGCCTAC----- mirR 22 555
-----TATTCATTTACTCCCCAG----- mirR 18 256
-----ATTCATTTACTCCCCAGCCTA----- mirR 21 214
-----TATTCATTTACTCCCCAGCC----- mirR 20 202
-----ATTCATTTACTCCCCAGCCTACA----- mirR 23 184
-----ATTCATTTACTCCCCAGCCT----- mirR 20 176
-----TATTCATTTACTCCCCAGC----- mirR 19 155
-----TCATTTACTCCCCAGCCTACA----- mirR 21 54
-----TTCATTTACTCCCCAGCCTACA----- mirR 22 45
-----ATTCATTTACTCCCCAGCCTACAC----- mirR 24 41
-----TCATTTACTCCCCAGCCTAC----- mirR 20 35
-----TTCATTTACTCCCCAGCCTAC----- mirR 21 33
-----ATTCATTTACTCCCCAGCC----- mirR 19 33
-----ATTCATTTACTCCCCAGC----- mirR 18 26
-----TCATTTACTCCCCAGCCTACAC----- mirR 22 23
-----TCATTTACTCCCCAGCCTA----- mirR 19 13
-----TTCATTTACTCCCCAGCCTA----- mirR 20 11
-----TTCATTTACTCCCCAGCCTACAC----- mirR 23 10
-----TTCATTTACTCCCCAGCC----- mirR 18 8
-----TTCATTTACTCCCCAGCCT----- mirR 19 7
-----TCATTTACTCCCCAGCCTACACAT----- mirR 24 6
-----TCATTTACTCCCCAGCCT----- mirR 18 4
-----CTATTCATTTACTCCCCA----- mirR 18 3
-----CTATTCATTTACTCCCCAGCCTACA----- mirR 25 1
-----CTATTCATTTACTCCCCAGCCTA----- mirR 23 1
-----CTATTCATTTACTCCCCAGCCTAC----- mirR 24 1
-----TCATTTACTCCCCAGCCTACACA----- mirR 23 1
-----TGAAAGCAATAACAGCACAAT morR 21 19
-----TGAAAGCAATAACAGCAC--- morR 18 7
-----TGAAAGCAATAACAGCACA-- morR 19 5
-----TGAAAGCAATAACAGCACA- morR 20 3
```



```

-----AGGTTGCCCATGGTGTGTTC----- mirL 21 23
-----GGTTGCCCATGGTGTGTTC----- mirL 19 5
-----AGGTTGCCCATGGTGTGTTCAT----- mirL 22 4
-----GGTTGCCCATGGTGTGTTCATTT----- mirL 23 3
-----AGGTTGCCCATGGTGTGTTC----- mirL 19 2
-----GGTTGCCCATGGTGTGTTCATT----- mirL 22 2
-----GGTTGCCCATGGTGTGTTCATTTT----- mirL 24 2
-----GGTTGCCCATGGTGTGTTC----- mirL 20 2
-----AGGTTGCCCATGGTGTGT----- mirL 18 1
-----AGTATTACATGGCCAATCTCC----- mirR 21 2361
-----AGTATTACATGGCCAATCTC----- mirR 20 1164
-----AGTATTACATGGCCAATCT----- mirR 19 1128
-----TGAGTATTACATGGCCAATCT----- mirR 21 924
-----AGTATTACATGGCCAATCTCCT----- mirR 22 729
-----AGTATTACATGGCCAATC----- mirR 18 632
-----TGAGTATTACATGGCCAATC----- mirR 20 596
-----TGAGTATTACATGGCCAATCTC----- mirR 22 503
-----TGAGTATTACATGGCCAATCTCC----- mirR 23 264
-----AGTATTACATGGCCAATCTCCTT----- mirR 23 160
-----TGAGTATTACATGGCCAAT----- mirR 19 159
-----TGAGTATTACATGGCCAA----- mirR 18 117
-----GAGTATTACATGGCCAATCT----- mirR 20 84
-----GAGTATTACATGGCCAATC----- mirR 19 48
-----GAGTATTACATGGCCAATCTC----- mirR 21 45
-----GAGTATTACATGGCCAATCTCC----- mirR 22 28
-----TGAGTATTACATGGCCAATCTCCT----- mirR 24 26
-----GAGTATTACATGGCCAAT----- mirR 18 14
-----AGTATTACATGGCCAATCTCCTT----- mirR 24 8
-----GTATTACATGGCCAATCTCCT----- mirR 21 4
-----ATTACATGGCCAATCTCC----- mirR 18 4
-----GTATTACATGGCCAATCTCC----- mirR 20 3
-----GAGTATTACATGGCCAATCTCCT----- mirR 23 3
-----TATTACATGGCCAATCTCC----- mirR 19 1
-----GTATTACATGGCCAATCTC----- mirR 19 1
-----TTTCGGCACTAAAATCTTCC morR 20 1

```

>mmu-mir-322

```

CGTTGACTCCGAAGGGCTGCAGCAGCAATTCATGTTTTGGAGTATTGCCAAGGTTCAAACATGAAGCGCTGCAACACCCC species len reads
CGTTGACTCCGAAGGGCT----- morL 18 1
-----CAGCAGCAATTCATGTTTTGG----- mirL 21 2167
-----CAGCAGCAATTCATGTTTTG----- mirL 20 1993
-----CAGCAGCAATTCATGTTTTGGA----- mirL 22 1769
-----CAGCAGCAATTCATGTTTTGGAG----- mirL 23 346
-----GCAGCAGCAATTCATGTTTTG----- mirL 21 315
-----CAGCAGCAATTCATGTTTT----- mirL 19 304
-----GCAGCAGCAATTCATGTTTTGG----- mirL 22 83

```

```

-----GCAGCAGCAATTCATGTTTT----- mirL 20 53
-----GCAGCAGCAATTCATGTTT----- mirL 19 31
-----GCAGCAGCAATTCATGTTTTGGA----- mirL 23 31
-----AGCAGCAATTCATGTTTTGG----- mirL 20 7
-----AGCAGCAATTCATGTTTTGGA----- mirL 21 6
-----AGCAGCAATTCATGTTTTG----- mirL 19 3
-----GCAGCAATTCATGTTTTG----- mirL 18 2
-----TGCAGCAGCAATTCATGTTTT----- mirL 21 2
-----CTGCAGCAGCAATTCATG----- mirL 18 2
-----AGCAGCAATTCATGTTTT----- mirL 18 1
-----GCAGCAATTCATGTTTTGGA----- mirL 20 1
-----TGCAGCAGCAATTCATGTTTTGGA----- mirL 24 1
-----AAACATGAAGCGCTGCAACA----- mirR 20 721
-----AAACATGAAGCGCTGCAACAC----- mirR 21 345
-----AAACATGAAGCGCTGCAAC----- mirR 19 193
-----AAACATGAAGCGCTGCAACACC----- mirR 22 78
-----CAAAACATGAAGCGCTGCAAC----- mirR 21 67
-----AAAAACATGAAGCGCTGCAACA----- mirR 21 66
-----AAACATGAAGCGCTGCAA----- mirR 18 44
-----CAAAACATGAAGCGCTGCAACAC----- mirR 23 34
-----CAAAACATGAAGCGCTGCAACA----- mirR 22 32
-----CAAAACATGAAGCGCTGCAA----- mirR 20 29
-----AAACATGAAGCGCTGCAACACC----- mirR 23 27
-----AAAAACATGAAGCGCTGCAAC----- mirR 20 21
-----AAAACATGAAGCGCTGCAACAC----- mirR 22 12
-----CAAAACATGAAGCGCTGC----- mirR 18 8
-----AAAACATGAAGCGCTGCAA----- mirR 19 7
-----CAAAACATGAAGCGCTGCA----- mirR 19 5
-----AAACATGAAGCGCTGCAACACCCC----- mirR 24 4
-----AAAAACATGAAGCGCTGCAACACC----- mirR 23 3
-----AACATGAAGCGCTGCAACA----- mirR 19 2
-----CAAAACATGAAGCGCTGCAACACC----- mirR 24 2
-----AAAACATGAAGCGCTGCAACACCCC----- mirR 25 1
-----AACATGAAGCGCTGCAACAC----- mirR 20 1
-----AACATGAAGCGCTGCAAC----- mirR 18 1
-----CATGAAGCGCTGCAACAC----- mirR 18 1

```

>mmu-mir-210

```

CAGCCACTGCCCACCGCACACTGCGTTGCTCCGGACCCACTGTGCGTGTGACAGCGGCTGATC species len reads
-AGCCACTGCCCACCGCACACTGC----- mirL 23 169
-AGCCACTGCCCACCGCACACT----- mirL 21 38
-AGCCACTGCCCACCGCACACTG----- mirL 22 30
-AGCCACTGCCCACCGCACAC----- mirL 20 28
-AGCCACTGCCCACCGCACAC----- mirL 19 8
--GCCACTGCCCACCGCACACTG----- mirL 21 2
CAGCCACTGCCCACCGCACACTGC----- mirL 24 1

```

```
--GCCACTGCCACCCGACACTGC----- mirL 22 1
-----CGTTGCTCCGGACCCACT----- loop 18 1
-----CTGTGCGTGTGACAGCGGCTGA-- mirR 22 3816
-----CTGTGCGTGTGACAGCGGCTGAT- mirR 23 1359
-----CTGTGCGTGTGACAGCGGC----- mirR 19 1143
-----CTGTGCGTGTGACAGCGGCTGATC mirR 24 1113
-----CTGTGCGTGTGACAGCGGCT---- mirR 20 390
-----CTGTGCGTGTGACAGCGGCTG--- mirR 21 274
-----CTGTGCGTGTGACAGCGG----- mirR 18 104
-----ACTGTGCGTGTGACAGCGGC----- mirR 20 58
-----ACTGTGCGTGTGACAGCGGCTGA-- mirR 23 58
-----ACTGTGCGTGTGACAGCGGCTGAT- mirR 24 32
-----ACTGTGCGTGTGACAGCGGCTGATC mirR 25 30
-----ACTGTGCGTGTGACAGCGGCTG--- mirR 22 27
-----ACTGTGCGTGTGACAGCGGCT---- mirR 21 23
-----ACTGTGCGTGTGACAGCG----- mirR 18 12
-----TGTGCGTGTGACAGCGGCTGAT- mirR 22 5
-----TGTGCGTGTGACAGCGGCTGATC mirR 23 4
-----TGTGCGTGTGACAGCGGCTGA-- mirR 21 4
-----GTGCGTGTGACAGCGGCTGAT- mirR 21 1
-----TGCCTGTGACAGCGGCTGA-- mirR 19 1
-----CCTACTGTGCGTGTGACAGCGG----- mirR 21 1
-----GTGCGTGTGACAGCGGCTGA-- mirR 20 1
```

>mmu-mir-676

| Sequence                                                        | species | len | reads |
|-----------------------------------------------------------------|---------|-----|-------|
| GACTCTACAACCTTAGGACTTGCAGAAATAAAGGAATGCCGTCCTGAGGTTGTTGAGCTGTGC | mirL    | 22  | 1143  |
| -ACTCTACAACCTTAGGACTTGC-----                                    | mirL    | 21  | 157   |
| -ACTCTACAACCTTAGGACTTG-----                                     | mirL    | 23  | 75    |
| -ACTCTACAACCTTAGGACTTGCA-----                                   | mirL    | 18  | 61    |
| -ACTCTACAACCTTAGGACTT-----                                      | mirL    | 20  | 57    |
| --CTCTACAACCTTAGGACTTGC-----                                    | mirL    | 21  | 52    |
| --CTCTACAACCTTAGGACTTGCA-----                                   | mirL    | 22  | 39    |
| --CTCTACAACCTTAGGACTTG-----                                     | mirL    | 20  | 6     |
| --CTCTACAACCTTAGGACTT-----                                      | mirL    | 19  | 5     |
| GACTCTACAACCTTAGGACTTGC-----                                    | mirL    | 23  | 2     |
| ---TCTACAACCTTAGGACTTGC-----                                    | mirL    | 20  | 2     |
| ---TCTACAACCTTAGGACTTG-----                                     | mirL    | 19  | 1     |
| ---TCTACAACCTTAGGACTT-----                                      | mirL    | 18  | 1     |
| --CTCTACAACCTTAGGACTTGCAG-----                                  | mirL    | 23  | 1     |
| -----CCGTCCTGAGGTTGTTGAGC-----                                  | mirR    | 20  | 2016  |
| -----CCGTCCTGAGGTTGTTGAGCTG---                                  | mirR    | 22  | 1890  |
| -----CCGTCCTGAGGTTGTTGAGCT---                                   | mirR    | 21  | 997   |
| -----CCGTCCTGAGGTTGTTGAGCTGT--                                  | mirR    | 23  | 917   |
| -----CCGTCCTGAGGTTGTTGAG-----                                   | mirR    | 19  | 865   |
| -----CCGTCCTGAGGTTGTTGAGCTGTG-                                  | mirR    | 24  | 201   |

```

-----CCGTCCTGAGGTTGTTGA----- mirR 18 158
-----CGTCCTGAGGTTGTTGAGCTGT-- mirR 22 10
-----CGTCCTGAGGTTGTTGAGC----- mirR 19 8
-----CGTCCTGAGGTTGTTGAGCTG-- mirR 21 4
-----CGTCCTGAGGTTGTTGAGCTGTGC mirR 24 2
-----CGTCCTGAGGTTGTTGAG----- mirR 18 2
-----CGTCCTGAGGTTGTTGAGCT--- mirR 20 1
-----GTCTGAGGTTGTTGAGCTG-- mirR 20 1
-----CGTCCTGAGGTTGTTGAGCTGTG- mirR 23 1
-----GTCTGAGGTTGTTGAGCTGT-- mirR 21 1
-----GCCGTCCTGAGGTTGTTGAGCTG-- mirR 23 1
-----TGCCGTCCTGAGGTTGTTGAGC----- mirR 22 1

```

>mmu-mir-346

```

AGGAGGTCCTCTGTGTTGGGCGTCTGTCTGCCCCGAGTGCCTGCCTCTCTGTTGCTCTGAAGGAGGCAGGGGCTGGGCCT species len reads
AGGAGGTCCTCTGTGTTGGGC----- morL 20 1
-----TGTCTGCCCGAGTGCCTGCCTC----- mirL 22 3895
-----TGTCTGCCCGAGTGCCTGCCTCT----- mirL 23 1600
-----TGTCTGCCCGAGTGCCTGCC----- mirL 20 858
-----TGTCTGCCCGAGTGCCTGCCTCTC----- mirL 24 768
-----TGTCTGCCCGAGTGCCTGCCT----- mirL 21 524
-----GTCTGCCCGAGTGCCTGCCTCTC----- mirL 23 173
-----GTCTGCCCGAGTGCCTGCCTCT----- mirL 22 90
-----GTCTGCCCGAGTGCCTGCCTC----- mirL 21 88
-----CTGTCTGCCCGAGTGCCTGCCTC----- mirL 23 80
-----CTGTCTGCCCGAGTGCCTGCCTCT----- mirL 24 24
-----GTCTGCCCGAGTGCCTGCCT----- mirL 20 23
-----CTGTCTGCCCGAGTGCCTGCC----- mirL 21 20
-----TCTGTCTGCCCGAGTGCCTGCC----- mirL 22 18
-----CTGTCTGCCCGAGTGCCTGCCT----- mirL 22 18
-----GTCTGCCCGAGTGCCTGCC----- mirL 19 17
-----TCTGTCTGCCCGAGTGCCT----- mirL 18 15
-----CTGTCTGCCCGAGTGCCTGC----- mirL 20 15
-----TCTGTCTGCCCGAGTGCCTGCCTC----- mirL 24 8
-----TCTGTCTGCCCGAGTGCCTGC----- mirL 21 8
-----TCTGTCTGCCCGAGTGCCTGCCTCT----- mirL 25 7
-----TCTGCCCGAGTGCCTGCCTCT----- mirL 21 5
-----TCTGCCCGAGTGCCTGCCTCTC----- mirL 22 1
-----TCTGCCCGAGTGCCTGCCT----- mirL 19 1
-----AAGGAGGCAGGGGCTGGGCCT mirR 21 3
-----CTGAAGGAGGCAGGGGCT----- mirR 18 2

```

>mmu-mir-146a

```

TCTGTGTGTATCCCCAGCTCTGAGAACTGAATTCATGGGTTATATCAATGTCAGACCTGTGAAATTCAGTTCTTCAGCTGGGATAGCTCTGTGCATCACGGACCTGAAG species len reads
TCTGTGTGTATCCCCAGCTCT----- morL 21 3
TCTGTGTGTATCCCCAGCTC----- morL 20 1

```

```

-----TGAGAACTGAATTCCATGGGTTA----- mirL 23 3946
-----TGAGAACTGAATTCCATGGGTT----- mirL 22 1604
-----TGAGAACTGAATTCCATGGGT----- mirL 21 703
-----TGAGAACTGAATTCCATGGG----- mirL 20 562
-----TGAGAACTGAATTCCATGG----- mirL 19 533
-----GAGAACTGAATTCCATGGGTTA----- mirL 22 372
-----GAGAACTGAATTCCATGGGTTAT----- mirL 23 70
-----GAGAACTGAATTCCATGGGTT----- mirL 21 57
-----GAGAACTGAATTCCATGGG----- mirL 19 40
-----GAGAACTGAATTCCATGGGT----- mirL 20 36
-----CTGAGAACTGAATTCCATGGGTT----- mirL 23 15
-----CTGAGAACTGAATTCCATGGGTT----- mirL 22 11
-----CTGAGAACTGAATTCCATGG----- mirL 20 9
-----CTGAGAACTGAATTCCATGGGTTA----- mirL 24 9
-----CTGAGAACTGAATTCCATGGGTTAT----- mirL 25 7
-----GAACTGAATTCCATGGGTT----- mirL 18 2
-----GAACTGAATTCCATGGGTT----- mirL 19 1
-----AGAACTGAATTCCATGGGTT----- mirL 19 1
-----AGAACTGAATTCCATGGGTTA----- mirL 21 1
-----TCTTCAGCTGGGATAGCT----- mirR 18 15
-----TCTTCAGCTGGGATAGCTC----- mirR 19 4
-----TCTTCAGCTGGGATAGCTCTGT----- mirR 22 2
-----TCTTCAGCTGGGATAGCTCTG----- mirR 21 1
-----TCTTCAGCTGGGATAGCTCT----- mirR 20 1
-----TGTCATCACGGACCTGAAG morR 19 1

```

>mmu-mir-192

```

CTCTGACCTATGAATTGACAGCCAGTACTCTTTTCTCTCCTCTGGCTGCCAATTCATAGGTCACAGGTATGTTACCTCAA species len reads
--CTGACCTATGAATTGACAGCCA----- mirL 22 2632
--CTGACCTATGAATTGACAGCC----- mirL 21 2608
--CTGACCTATGAATTGACAGC----- mirL 20 1287
--CTGACCTATGAATTGACAG----- mirL 19 337
--CTGACCTATGAATTGACAGCCAG----- mirL 23 293
--TGACCTATGAATTGACAGCCA----- mirL 21 177
--TGACCTATGAATTGACAGCCAG----- mirL 22 164
--TGACCTATGAATTGACAGCC----- mirL 20 149
--TGACCTATGAATTGACAGC----- mirL 19 112
--TGACCTATGAATTGACAGCCAGT----- mirL 23 70
--GACCTATGAATTGACAGCCA----- mirL 20 10
--GACCTATGAATTGACAGCCAG----- mirL 21 8
--GACCTATGAATTGACAGCC----- mirL 19 6
--GACCTATGAATTGACAGCCAGT----- mirL 22 6
--GACCTATGAATTGACAGC----- mirL 18 3
-TCTGACCTATGAATTGACAGCCA----- mirL 23 2
-TCTGACCTATGAATTGACAGCC----- mirL 22 2
-TCTGACCTATGAATTGAC----- mirL 18 1

```



```

CTCTGACCTATGAATTGA-----CTGCCAATTCATAGGTCAC-----mirL 18 1
-----CTGCCAATTCATAGGTCACA-----mirR 20 29
-----CTGCCAATTCATAGGTCACAGG-----mirR 21 12
-----CTGCCAATTCATAGGTCACAG-----mirR 23 12
-----GCTGCCAATTCATAGGTCACA-----mirR 22 9
-----GGCTGCCAATTCATAGGTCAC-----mirR 22 8
-----GCTGCCAATTCATAGGTCAC-----mirR 21 4
-----CTGCCAATTCATAGGTCAC-----mirR 19 4
-----CTGCCAATTCATAGGTC-----mirR 18 3
-----GCTGCCAATTCATAGGTC-----mirR 19 1
-----GGCTGCCAATTCATAGGTCACA-----mirR 23 1
-----GGCTGCCAATTCATAGGTC-----mirR 20 1
-----GGCTGCCAATTCATAGGTCACAG-----mirR 24 1
-----GCTGCCAATTCATAGGTCACAGG-----mirR 24 1
-----CAGGTATGTTACCTCAA morR 18 1

```

>mmu-mir-144

```

CCTCCTCCAGGACCTTGGCTGGGATATCATCATATACTGTAAGTTTGTGATGAGACACTACAGTATAGATGATGTACTAGTCTGGGTACCCACCTCC species len reads
CCTCCTCCAGGACCTTGG-----morL 18 1
-----GGATATCATCATATACTGTAA-----mirL 21 490
-----GGATATCATCATATACTGTAAGT-----mirL 23 182
-----GGATATCATCATATACTGTAAG-----mirL 22 139
-----TGGGATATCATCATATACTGT-----mirL 21 89
-----GGATATCATCATATACTGT-----mirL 20 58
-----GGATATCATCATATACTGT-----mirL 19 54
-----TGGGATATCATCATATACTGTAA-----mirL 23 33
-----TGGGATATCATCATATACTG-----mirL 20 21
-----TGGGATATCATCATATACTGTA-----mirL 22 15
-----TATCATCATATACTGTAA-----mirL 18 9
-----TATCATCATATACTGTAAG-----mirL 19 7
-----TGGGATATCATCATATACT-----mirL 18 2
-----GGGATATCATCATATACTGTAA-----mirL 22 1
-----GATATCATCATATACTGTAAGTTT-----mirL 24 1
-----CTGGGATATCATCATATACT-----mirL 20 1
-----GGGATATCATCATATACTGT-----mirL 20 1
-----GATATCATCATATACTGTAAGT-----mirL 22 1
-----GATATCATCATATACTGTAAG-----mirL 21 1
-----GGGATATCATCATATACTGTA-----mirL 21 1
-----GTTTGTGATGAGACACTA-----loop 18 1
-----GTTTGTGATGAGACACTAC-----loop 19 1
-----TACAGTATAGATGATGTAC-----mirR 19 2514
-----TACAGTATAGATGATGTACT-----mirR 20 2227
-----TACAGTATAGATGATGTACTA-----mirR 21 762
-----TACAGTATAGATGATGTA-----mirR 18 681
-----ACAGTATAGATGATGTAC-----mirR 18 133

```

```

-----TACAGTATAGATGATGTAAGTACTAG----- mirR 22 123
-----ACAGTATAGATGATGTAAGTACT----- mirR 19 103
-----CTACAGTATAGATGATGTAAGTACT----- mirR 20 89
-----CTACAGTATAGATGATGTAAGTACT----- mirR 21 55
-----ACAGTATAGATGATGTAAGTACT----- mirR 20 40
-----CTACAGTATAGATGATGTAAGTACT----- mirR 22 32
-----TACAGTATAGATGATGTAAGTACTAGT----- mirR 23 22
-----TACAGTATAGATGATGTAAGTACTAGTC----- mirR 24 12
-----CTACAGTATAGATGATGTAAGTACTAGTC----- mirR 19 12
-----CTACAGTATAGATGATGTAAGTACTAGTC----- mirR 18 11
-----CTACAGTATAGATGATGTAAGTACTAGTC----- mirR 23 9
-----ACAGTATAGATGATGTAAGTACTAGTC----- mirR 21 6
-----ACAGTATAGATGATGTAAGTACTAGTC----- mirR 22 3
-----CTACAGTATAGATGATGTAAGTACTAGTC----- mirR 24 1
-----CAGTATAGATGATGTAAGTACTAGTC----- mirR 18 1
-----ACAGTATAGATGATGTAAGTACTAGTC----- mirR 23 1
-----TCTGGGTACCCACCTCC morR 18 1

```

>mmu-mir-34c

```

CTAGGCAGTGTAGTTAGCTGATTGCTAATAGTACCAATCACTAACCACACAGCCAGGTA species len reads
--AGGCAGTGTAGTTAGCTGATTGC----- mirL 23 5420
--AGGCAGTGTAGTTAGCTGATT----- mirL 21 630
--AGGCAGTGTAGTTAGCTGATTG----- mirL 22 488
--AGGCAGTGTAGTTAGCTGATT----- mirL 20 423
--AGGCAGTGTAGTTAGCTGATT----- mirL 19 201
-TAGGCAGTGTAGTTAGCTGATTGC----- mirL 24 25
-TAGGCAGTGTAGTTAGCTGATT----- mirL 22 23
-TAGGCAGTGTAGTTAGCTGATT----- mirL 21 9
-TAGGCAGTGTAGTTAGCTGATTG----- mirL 23 7
CTAGGCAGTGTAGTTAGCTGATTGC----- mirL 25 2
-TAGGCAGTGTAGTTAGCTGATTGCT----- mirL 25 2
-----CAGTGTAGTTAGCTGATTGC----- mirL 20 2
---GGCAGTGTAGTTAGCTGATTGC----- mirL 22 1
---GGCAGTGTAGTTAGCTGATTG----- mirL 21 1
-----AATCACTAACCACACAGCCAGG----- mirR 22 132
-----AATCACTAACCACACAGCC----- mirR 19 60
-----AATCACTAACCACACAGCCAG----- mirR 21 44
-----AATCACTAACCACACAGCCAGGT----- mirR 23 37
-----AATCACTAACCACACAGCCAG----- mirR 18 36
-----AATCACTAACCACACAGCCAG----- mirR 20 31
-----ATCACTAACCACACAGCCAGG----- mirR 21 13
-----AATCACTAACCACACAGCCAGGTA----- mirR 24 6
-----ATCACTAACCACACAGCCAGGT----- mirR 22 4
-----ATCACTAACCACACAGCCAG----- mirR 19 4
-----ATCACTAACCACACAGCCAGGTA----- mirR 23 3
-----ATCACTAACCACACAGCCAG----- mirR 18 3

```

```
-----ATCACTAACCACACAGCCAG--- mirR 20 2

>mmu-mir-665
AGGGGCCTCTGCCTCTATCCAGGATTATGTTTTTATGACCAGGAGGCTGAGGTCCCTTACA species len reads
AGGGGCCTCTGCCTCTATCC----- mirL 20 14
AGGGGCCTCTGCCTCTATCCA----- mirL 21 10
AGGGGCCTCTGCCTCTATC----- mirL 19 5
AGGGGCCTCTGCCTCTATCCAG----- mirL 22 3
AGGGGCCTCTGCCTCTATCCAGG----- mirL 23 2
-----ACCAGGAGGCTGAGGTCCCTTAC- mirR 23 3829
-----ACCAGGAGGCTGAGGTCCCTTA-- mirR 22 901
-----ACCAGGAGGCTGAGGTCCC----- mirR 19 624
-----ACCAGGAGGCTGAGGTCCCTT--- mirR 21 595
-----CCAGGAGGCTGAGGTCCCTTA-- mirR 21 436
-----CCAGGAGGCTGAGGTCCCTTAC- mirR 22 381
-----ACCAGGAGGCTGAGGTCCCT--- mirR 20 231
-----ACCAGGAGGCTGAGGTCC----- mirR 18 194
-----ACCAGGAGGCTGAGGTCCCTTACA mirR 24 66
-----CCAGGAGGCTGAGGTCCC----- mirR 18 53
-----CCAGGAGGCTGAGGTCCCTT--- mirR 20 48
-----CCAGGAGGCTGAGGTCCCT--- mirR 19 19
-----CCAGGAGGCTGAGGTCCCTTACA mirR 23 18
-----GACCAGGAGGCTGAGGTCCCTTAC- mirR 24 4
-----CAGGAGGCTGAGGTCCCTTAC- mirR 21 2
-----GACCAGGAGGCTGAGGTCCCTTA-- mirR 23 2
-----TGACCAGGAGGCTGAGGTCCC----- mirR 21 1
-----CAGGAGGCTGAGGTCCCTT--- mirR 19 1
```

```
>mmu-mir-335
GTCAAGAGCAATAACGAAAAATGTTTTGTTTTTCGTAAACCGTTTTTCATTATTGCTCCTGACCCCC species len reads
-TCAAGAGCAATAACGAAAAATGT----- mirL 23 2219
-TCAAGAGCAATAACGAAAA----- mirL 19 291
-TCAAGAGCAATAACGAAAAATG----- mirL 22 284
--CAAGAGCAATAACGAAAAATGT----- mirL 22 235
---AAGAGCAATAACGAAAAATGT----- mirL 21 226
-TCAAGAGCAATAACGAAAAAT----- mirL 21 138
---AAGAGCAATAACGAAAAATGTT----- mirL 22 133
-TCAAGAGCAATAACGAAAA----- mirL 20 127
---AAGAGCAATAACGAAAAATGTTT----- mirL 23 39
--CAAGAGCAATAACGAAAAATG----- mirL 21 21
--CAAGAGCAATAACGAAAAATGTT----- mirL 23 20
---AAGAGCAATAACGAAAAAT----- mirL 19 18
--CAAGAGCAATAACGAAAA----- mirL 18 18
---AGAGCAATAACGAAAAATGTTT----- mirL 22 16
---AAGAGCAATAACGAAAA----- mirL 18 15
--CAAGAGCAATAACGAAAAAT----- mirL 20 13
```

```
---AGAGCAATAACGAAAAATGT----- mirL 20 5
---AGAGCAATAACGAAAAATGTT----- mirL 21 2
---AGAGCAATAACGAAAAATGTTTGT----- mirL 24 1
GTCAAGAGCAATAACGAAAAATGT----- mirL 24 1
---AGAGCAATAACGAAAAATGTTG----- mirL 23 1
-----TTTTTCATTATTGCTCCTGACC--- mirR 22 689
-----TTTTTCATTATTGCTCCTGAC--- mirR 21 599
-----GTTTTTCATTATTGCTCCTGAC--- mirR 22 425
-----GTTTTTCATTATTGCTCCTGACC--- mirR 23 410
-----TTTTTCATTATTGCTCCTGACC--- mirR 21 162
-----TTTTTCATTATTGCTCCTGACCC-- mirR 23 141
-----TTTTTCATTATTGCTCCTGA---- mirR 20 134
-----TTTTTCATTATTGCTCCTGAC--- mirR 20 125
-----GTTTTTCATTATTGCTCCTCC--- mirR 18 92
-----GTTTTTCATTATTGCTCCTGA---- mirR 21 86
-----GTTTTTCATTATTGCTCCTG---- mirR 20 81
-----CCGTTTTTCATTATTGCTCCTG--- mirR 22 74
-----TTTTTCATTATTGCTCCTG---- mirR 19 72
-----GTTTTTCATTATTGCTCCTGACCC-- mirR 24 67
-----CCGTTTTTCATTATTGCTCCT--- mirR 21 65
-----TTTTTCATTATTGCTCCT--- mirR 18 36
-----TTTTTCATTATTGCTCCTGA---- mirR 19 34
-----GTTTTTCATTATTGCTCCT--- mirR 19 34
-----CGTTTTTCATTATTGCTCCTGAC--- mirR 23 33
-----CCGTTTTTCATTATTGCTCCTGA---- mirR 23 29
-----CCGTTTTTCATTATTGCTCCT--- mirR 20 25
-----TTTTTCATTATTGCTCCTGACCC-- mirR 22 24
-----CGTTTTTCATTATTGCTCCTGA---- mirR 22 24
-----TTTTTCATTATTGCTCCTGACCCC- mirR 24 21
-----TTTTTCATTATTGCTCCTG--- mirR 18 14
-----TTTTTCATTATTGCTCCTGACCCC- mirR 23 13
-----CCGTTTTTCATTATTGCTC----- mirR 19 9
-----CGTTTTTCATTATTGCTCCT--- mirR 19 9
-----TTTCATTATTGCTCCTGACC--- mirR 20 6
-----CCGTTTTTCATTATTGCTCCTGACC--- mirR 25 5
-----CGTTTTTCATTATTGCTCCTG---- mirR 21 5
-----TTTCATTATTGCTCCTGACCC-- mirR 21 4
-----CCGTTTTTCATTATTGCTCCTGAC--- mirR 24 4
-----TTTCATTATTGCTCCTGACCCC- mirR 22 4
-----CGTTTTTCATTATTGCTCCT--- mirR 20 4
-----CGTTTTTCATTATTGCTCCTGACC--- mirR 24 2
-----TTTCATTATTGCTCCTGACCCCC mirR 23 1
-----TTCATTATTGCTCCTGACCCCC mirR 22 1
-----TTCATTATTGCTCCTGACCC-- mirR 20 1
-----TTCATTATTGCTCCTGAC--- mirR 18 1
-----TTCATTATTGCTCCTGACC--- mirR 19 1
```

```
-----TTTTATTATTGCTCCTGACCCCC mirR 24 1
-----TTTCATTATTGCTCCTGA----- mirR 18 1

>mmu-mir-770
CAGCCTAACCTTGTGAGAAGCCACCTTCTGTGCCCCCAGACCACGTGTCTGGGCCACGTGAGCAACGCCACGTGGGCCTGACGTGGAGCTGGGGCCGAGGGGTCTGATGGCCTCCTGTTTCAGA species len
-----AAGCCACCTTCTGTGCCCCC----- morL 20 190
-----AGCCACCTTCTGTGCCCCC----- morL 19 99
-----AAGCCACCTTCTGTGCCCCA----- morL 21 68
-----AAGCCACCTTCTGTGCCCC----- morL 19 50
-----AGCCACCTTCTGTGCCCCA----- morL 20 48
-----CCACCTTCTGTGCCCCA----- morL 18 35
-----AGCCACCTTCTGTGCCCC----- morL 18 26
-----GCCACCTTCTGTGCCCC----- morL 18 23
-----GAAGCCACCTTCTGTGCCCC----- morL 21 13
-----GAAGCCACCTTCTGTGCCCCA----- morL 22 9
-----AAGCCACCTTCTGTGCCCC----- morL 18 9
-----GCCACCTTCTGTGCCCCA----- morL 19 5
-----AAGCCACCTTCTGTGCCCCCAG----- morL 22 4
-----GAAGCCACCTTCTGTGCCCC----- morL 20 4
-----TAACCTTGTGAGAAGCCACCTTCTGTGCCCC----- morL 32 3
-----GAAGCCACCTTCTGTGCCCC----- morL 19 2
-----CTTGTGAGAAGCCACCTTCTGTGCCCCA----- morL 29 1
-----CCTTGTGAGAAGCCACCTTCTGTGCCCC----- morL 29 1
-----GCCACCTTCTGTGCCCCCAG----- morL 20 1
-----AGCCACCTTCTGTGCCCCCAG----- morL 21 1
-----AGAAGCCACCTTCTGTGCCCC----- morL 20 1
CAGCCTAACCTTGTGAGAAGCCACCTTCTGTGCC----- morL 34 1
--GCCTAACCTTGTGAGAAGCCACCTTCTGTGCCCC----- morL 35 1
----TAACCTTGTGAGAAGCCACCTTCTGTGCC----- morL 29 1
-----CTTGTGAGAAGCCACCTTCTGTGCC----- morL 25 1
-AGCCTAACCTTGTGAGAAGCCACCTTCTGTGCCCC----- morL 35 1
-----CCTTGTGAGAAGCCACCTTCTGTGCCCC----- morL 28 1
-----AGCACCGTGTCTGGGCCAC----- mirL 21 772
-----AGCACCGTGTCTGGGCCACG----- mirL 22 582
-----AGCACCGTGTCTGGGCC----- mirL 19 499
-----AGCACCGTGTCTGGGCCACGT----- mirL 23 492
-----AGCACCGTGTCTGGGC----- mirL 18 456
-----GCACCACGTGTCTGGGCCAC----- mirL 20 3
-----CAGCACCGTGTCTGGGCCAC----- mirL 22 2
-----ACCACGTGTCTGGGCCACG----- mirL 19 1
-----CAGCACCGTGTCTGGGC----- mirL 19 1
-----CCCAGCACCGTGTCTGGG----- mirL 20 1
-----GCACCACGTGTCTGGGCCACG----- mirL 21 1
-----CCAGCACCGTGTCTGGGCCACGT----- mirL 25 1
-----CAGCACCGTGTCTGGGCCACG----- mirL 23 1
-----CACCACGTGTCTGGGCCACGT----- mirL 21 1
```

```

-----GTGGGCCTGACGTGGAGCTGG-----mirR 21 579
-----CGTGGGCCTGACGTGGAGCTGG-----mirR 22 501
-----CGTGGGCCTGACGTGGAGC-----mirR 19 474
-----GTGGGCCTGACGTGGAGCTGGG-----mirR 22 289
-----GTGGGCCTGACGTGGAGCTG-----mirR 20 241
-----CGTGGGCCTGACGTGGAGCTG-----mirR 21 217
-----CGTGGGCCTGACGTGGAGCTGGG-----mirR 23 211
-----GTGGGCCTGACGTGGAGC-----mirR 18 208
-----GTGGGCCTGACGTGGAGCTGGGG-----mirR 23 161
-----GTGGGCCTGACGTGGAGCT-----mirR 19 155
-----CGTGGGCCTGACGTGGAGCT-----mirR 20 143
-----TGGGCCTGACGTGGAGCTGGG-----mirR 21 116
-----TGGGCCTGACGTGGAGCTGGGGC-----mirR 23 109
-----GTGGGCCTGACGTGGAGCTGGGGC-----mirR 24 84
-----CGTGGGCCTGACGTGGAG-----mirR 18 73
-----CGTGGGCCTGACGTGGAGCTGGGG-----mirR 24 66
-----TGGGCCTGACGTGGAGCTGGGG-----mirR 22 62
-----TGGGCCTGACGTGGAGCTGG-----mirR 20 61
-----TGGGCCTGACGTGGAGCTGGGGCC-----mirR 24 56
-----TGGGCCTGACGTGGAGCTG-----mirR 19 29
-----TGGGCCTGACGTGGAGCT-----mirR 18 17
-----GGGCCTGACGTGGAGCTGGGGC-----mirR 22 8
-----GGGCCTGACGTGGAGCTGGG-----mirR 20 7
-----GGGCCTGACGTGGAGCTGGGG-----mirR 21 4
-----GGGCCTGACGTGGAGCTGGGGCC-----mirR 23 4
-----GGGCCTGACGTGGAGCTGG-----mirR 19 3
-----ACGTGGGCCTGACGTGGAGCT-----mirR 21 1
-----ACGTGGGCCTGACGTGGAGCTGG-----mirR 23 1
-----CACGTGGGCCTGACGTGGAGCT-----mirR 22 1
-----ACGTGGGCCTGACGTGGAGCTG-----mirR 22 1
-----GGGCCTGACGTGGAGCTG-----mirR 18 1
-----GGCCGCAGGGGTCTGATGGCCTCC-----morR 24 18
-----GGCCGCAGGGGTCTGATGGCCTCCTGTTTCAGA-----morR 33 9
-----GGCCGCAGGGGTCTGATGGCCTCCTGTTTC-----morR 30 4
-----GGCCGCAGGGGTCTGATGGCCTC-----morR 23 3
-----GGCCGCAGGGGTCTGATGGCCTCCT-----morR 25 2
-----GGCCGCAGGGGTCTGATGGCC-----morR 21 2
-----GGCCGCAGGGGTCTGATGGCCTCCTGTTTCAG-----morR 32 1

```

>mmu-mir-200c

```

TCGTCTTACCCAGCAGTGTTTGGGTGCTGGTTGGGAGTCTCTAATACTGCCGGTAATGATGGAGGCCCTGTCCCAGTGT species len reads
-CGTCTTACCCAGCAGTGTTTGG-----mirL 22 4
-CGTCTTACCCAGCAGTGTTTGG-----mirL 21 4
--GTCTTACCCAGCAGTGTTT-----mirL 19 4
--GTCTTACCCAGCAGTGTTT-----mirL 20 3
-CGTCTTACCCAGCAGTGTT-----mirL 19 2

```

```

--GTCTTACCCAGCAGTGTTTGGG----- mirL 22 2
TCGTCTTACCCAGCAGTGTTF----- mirL 21 1
---TCTTACCCAGCAGTGTTF----- mirL 18 1
---CTTACCCAGCAGTGTTFG----- mirL 18 1
-CGTCTTACCCAGCAGTGTTF----- mirL 20 1
-----TAATACTGCCGGGTAATGATGGA----- mirR 23 1679
-----TAATACTGCCGGGTAATGATGG----- mirR 22 1584
-----TAATACTGCCGGGTAATGATG----- mirR 21 1167
-----TAATACTGCCGGGTAATG----- mirR 18 621
-----TAATACTGCCGGGTAATGAT----- mirR 20 553
-----TAATACTGCCGGGTAATGA----- mirR 19 377
-----AATACTGCCGGGTAATGATGGA----- mirR 22 332
-----TAATACTGCCGGGTAATGATGGAG----- mirR 24 269
-----AATACTGCCGGGTAATGATG----- mirR 20 203
-----AATACTGCCGGGTAATGATGG----- mirR 21 176
-----AATACTGCCGGGTAATGAT----- mirR 19 91
-----AATACTGCCGGGTAATGATGGAG----- mirR 23 68
-----CTAATACTGCCGGGTAATGATG----- mirR 22 41
-----AATACTGCCGGGTAATGA----- mirR 18 31
-----CTAATACTGCCGGGTAATGA----- mirR 20 30
-----CTAATACTGCCGGGTAATGAT----- mirR 21 28
-----AATACTGCCGGGTAATGATGGAG----- mirR 24 15
-----CTAATACTGCCGGGTAATG----- mirR 19 10
-----CTAATACTGCCGGGTAATGATGGA----- mirR 24 7
-----CTAATACTGCCGGGTAATGATGGAG----- mirR 25 5
-----CTAATACTGCCGGGTAATGATGG----- mirR 23 5
-----ATACTGCCGGGTAATGATGG----- mirR 20 2
-----TACTGCCGGGTAATGATGGAG----- mirR 22 1
-----ATACTGCCGGGTAATGATG----- mirR 19 1
-----ATACTGCCGGGTAATGAT----- mirR 18 1
-----GGAGCCCCCTGTCCCAGT-- morR 18 2
-----AGGCCCTGTCCCAGTGT morR 18 1

>mmu-mir-421
AGGCCTCATTAATGTTTGTGAATGAAAAATGAATCATCAACAGACATTAATTGGGCGCCTGCTCTGTGATCTCCATGGG species len reads
-GGCCTCATTAATGTTTGTGA----- mirL 22 14
-GGCCTCATTAATGTTTGTG----- mirL 21 10
-GGCCTCATTAATGTTTGT----- mirL 19 6
---CTCATTAATGTTTGTGA----- mirL 19 5
-GGCCTCATTAATGTTTGT----- mirL 20 2
---CTCATTAATGTTTGTGAATGA----- mirL 23 2
AGGCCTCATTAATGTTTGTGA----- mirL 23 1
-GGCCTCATTAATGTTTGTGAAT----- mirL 24 1
---CTCATTAATGTTTGTGA----- mirL 20 1
---CTCATTAATGTTTGTGAAT----- mirL 21 1
---CCTCATTAATGTTTGTGA----- mirL 21 1

```

```

---CCTCATTAAATGTTTGTG----- mirL 19 1
---CCTCATTAAATGTTTGTGA----- mirL 20 1
-----ATCAACAGACATTAATTGGGCGC----- mirR 23 1762
-----ATCAACAGACATTAATTGGGC----- mirR 21 1569
-----ATCAACAGACATTAATTGGG----- mirR 20 947
-----ATCAACAGACATTAATTGG----- mirR 19 736
-----ATCAACAGACATTAATTGGGCG----- mirR 22 689
-----ATCAACAGACATTAATTGGGCGCC----- mirR 24 486
-----TCAACAGACATTAATTGGGCGC----- mirR 22 332
-----TCAACAGACATTAATTGGGCGCC----- mirR 23 122
-----TCAACAGACATTAATTGGGC----- mirR 20 114
-----ATCAACAGACATTAATTG----- mirR 18 76
-----CAACAGACATTAATTGGGCGC----- mirR 21 46
-----TCAACAGACATTAATTGGGCG----- mirR 21 38
-----TCAACAGACATTAATTGG----- mirR 18 33
-----TCAACAGACATTAATTGGG----- mirR 19 29
-----CAACAGACATTAATTGGGC----- mirR 19 16
-----CAACAGACATTAATTGGGCGCC----- mirR 22 14
-----AACAGACATTAATTGGGCGCC----- mirR 21 9
-----AACAGACATTAATTGGGCGC----- mirR 20 9
-----AACAGACATTAATTGGGC----- mirR 18 8
-----CAACAGACATTAATTGGGCG----- mirR 20 6
-----AACAGACATTAATTGGGCGCCTGC----- mirR 24 5
-----TCAACAGACATTAATTGGGCGCCT----- mirR 24 4
-----CAACAGACATTAATTGGG----- mirR 18 4
-----AACAGACATTAATTGGGCG----- mirR 19 3
-----AACAGACATTAATTGGGCGCCT----- mirR 22 3
-----CATCAACAGACATTAATTGGGC----- mirR 22 3
-----AACAGACATTAATTGGGCGCCTG----- mirR 23 3
-----CATCAACAGACATTAATTGG----- mirR 20 2
-----CATCAACAGACATTAATTGGGCGCC----- mirR 25 1
-----ATCATCAACAGACATTAATTGG----- mirR 22 1
-----CTCTGTGATCTCCATGGG morR 18 1

>mmu-mir-3072
AGGGACCCCGAGGGAGGGCAGGCTGCCCCAGGCCCTGCCCCCTCCAGGAAGCCTTCTTGCTCCAGCCCAACACACAAT species len reads
AGGGACCCCGAGGGAGGGCAGGC----- mirL 23 4
AGGGACCCCGAGGGAGGGCAG----- mirL 21 2
AGGGACCCCGAGGGAGGGCAG----- mirL 22 1
-----TGCCCCCTCCAGGAAGCCTTCT----- mirR 22 4858
-----TGCCCCCTCCAGGAAGCCTTC----- mirR 21 1217
-----TGCCCCCTCCAGGAAGCC----- mirR 18 303
-----TGCCCCCTCCAGGAAGCCTT----- mirR 20 204
-----TGCCCCCTCCAGGAAGCCTTCTT----- mirR 23 182
-----GCCCCCTCCAGGAAGCCTTCT----- mirR 21 126
-----TGCCCCCTCCAGGAAGCCT----- mirR 19 59

```



```

-----GCCCCCTCCAGGAAGCCTTC----- mirR 20 24
-----GCCCCCTCCAGGAAGCCTT----- mirR 19 8
-----GCCCCCTCCAGGAAGCCTTCTT----- mirR 22 7
-----TGCCCCCTCCAGGAAGCCTTCTTGC----- mirR 25 6
-----CCTGCCCCCTCCAGGAAG----- mirR 18 1
-----CCCCCTCCAGGAAGCCTTC----- mirR 19 1
-----CCCCCTCCAGGAAGCCTT----- mirR 18 1
-----GCCCCCTCCAGGAAGCCT----- mirR 18 1
-----CTCCAGCCCAACACACAAT morR 19 1

```

>mmu-mir-34b

```

CGGGCGCCCGGTGCTCGGTTTGTAGGCAGTGTAAATTAGCTGATTGTAGTGCGGTGCTGACAATCACTAACTCCACTGCCATCAA species len reads
CGGGCGCCCGGTGCTCGGTT----- morL 20 1
----CGCCCGGTGCTCGGTTG----- morL 18 1
-----AGGCAGTGTAAATTAGCTGATTGT----- mirL 23 1884
-----TAGGCAGTGTAAATTAGCTGATT----- mirL 22 149
-----TAGGCAGTGTAAATTAGCTGATTGT----- mirL 24 111
-----AGGCAGTGTAAATTAGCTGATTG----- mirL 22 109
-----TAGGCAGTGTAAATTAGCTGATTGTA----- mirL 25 105
-----AGGCAGTGTAAATTAGCTGATTGTA----- mirL 24 102
-----AGGCAGTGTAAATTAGCTGATT----- mirL 21 79
-----AGGCAGTGTAAATTAGCTGATT----- mirL 20 77
-----TAGGCAGTGTAAATTAGCTGATTG----- mirL 23 67
-----TAGGCAGTGTAAATTAGCTGATT----- mirL 21 43
-----GGCAGTGTAAATTAGCTGATTGT----- mirL 22 1
-----GCAGTGTAAATTAGCTGATTGT----- mirL 21 1
-----AATCACTAACTCCACTGCCATC----- mirR 22 2333
-----AATCACTAACTCCACTGCCAT----- mirR 21 596
-----AATCACTAACTCCACTGC----- mirR 18 273
-----ATCACTAACTCCACTGCCATC----- mirR 21 235
-----AATCACTAACTCCACTGCC----- mirR 19 203
-----AATCACTAACTCCACTGCCATCA----- mirR 23 186
-----ATCACTAACTCCACTGCCATCA----- mirR 22 170
-----AATCACTAACTCCACTGCCA----- mirR 20 107
-----ATCACTAACTCCACTGCCAT----- mirR 20 52
-----CAATCACTAACTCCACTGCCATC----- mirR 23 19
-----ATCACTAACTCCACTGCC----- mirR 18 18
-----ATCACTAACTCCACTGCCATCAA----- mirR 23 13
-----ATCACTAACTCCACTGCCA----- mirR 19 12
-----AATCACTAACTCCACTGCCATCAA----- mirR 24 11
-----CAATCACTAACTCCACTGCCA----- mirR 21 5
-----TCACTAACTCCACTGCCATCA----- mirR 21 4
-----CAATCACTAACTCCACTGCC----- mirR 20 4
-----CAATCACTAACTCCACTGC----- mirR 19 3
-----CACTAACTCCACTGCCATC----- mirR 19 3
-----CAATCACTAACTCCACTG----- mirR 18 2

```

```
-----GACAATCACTAACTCCAC----- mirR 18 1
-----TCACTAACTCCACTGCCATC-- mirR 20 1
-----CAATCACTAACTCCACTGCCAT-- mirR 22 1
-----ACAATCACTAACTCCACT----- mirR 18 1
```

>mmu-mir-181d

| CCACAGCAAAGGTCACAATTACATTCAATTGTTGTCGGTGGGTTGTGAGGAGGCAGCCAGACCCACCGGGGGATGAATGTCACTGTGGCTGGGCCAA | species | len | reads |
|---------------------------------------------------------------------------------------------------|---------|-----|-------|
| -----AACATTCATTGTTGTCGGTGGGTTG-----                                                               | morL    | 20  | 1     |
| -----AACATTCATTGTTGTCGGTGGGT-----                                                                 | mirL    | 25  | 1894  |
| -----AACATTCATTGTTGTCGGTGG-----                                                                   | mirL    | 23  | 1694  |
| -----AACATTCATTGTTGTCGGTGG-----                                                                   | mirL    | 21  | 1101  |
| -----AACATTCATTGTTGTCGGTGGG-----                                                                  | mirL    | 22  | 1080  |
| -----AACATTCATTGTTGTCGGTGGGTT-----                                                                | mirL    | 24  | 930   |
| -----ACATTCATTGTTGTCGGTGG-----                                                                    | mirL    | 20  | 27    |
| -----ACATTCATTGTTGTCGGTGGGTTG-----                                                                | mirL    | 24  | 20    |
| -----ACATTCATTGTTGTCGGTGGGTT-----                                                                 | mirL    | 23  | 20    |
| -----ACATTCATTGTTGTCGGTGGGT-----                                                                  | mirL    | 22  | 18    |
| -----ACATTCATTGTTGTCGGTG-----                                                                     | mirL    | 19  | 9     |
| -----TAACATTCATTGTTGTCGGTGGG-----                                                                 | mirL    | 23  | 3     |
| -----TAACATTCATTGTTGTCGGTGGGTT-----                                                               | mirL    | 25  | 2     |
| -----TAACATTCATTGTTGTCGGT-----                                                                    | mirL    | 20  | 1     |
| -----TAACATTCATTGTTGTCGGTGGGT-----                                                                | mirL    | 24  | 1     |
| -----CATTCATTGTTGTCGGTGGGTT-----                                                                  | mirL    | 22  | 1     |
| -----CATTCATTGTTGTCGGTGGG-----                                                                    | mirL    | 20  | 1     |
| -----CATTCATTGTTGTCGGTGGGTTG-----                                                                 | mirL    | 23  | 1     |
| -----TGTGAGGAGGCAGCCAGAC-----                                                                     | loop    | 19  | 1     |
| -----CCACCGGGGATGAATGTCA-----                                                                     | mirR    | 20  | 6     |
| -----CCACCGGGGATGAATGTCA-----                                                                     | mirR    | 21  | 5     |
| -----CCCACCGGGGATGAATGTCA-----                                                                    | mirR    | 21  | 4     |
| -----CCACCGGGGATGAATGTCACT-----                                                                   | mirR    | 22  | 2     |
| -----CACCGGGGATGAATGTCA-----                                                                      | mirR    | 19  | 1     |
| -----CCCACCGGGGATGAATGT-----                                                                      | mirR    | 19  | 1     |
| -----ACCCACCGGGGATGAATGTCA-----                                                                   | mirR    | 23  | 1     |
| -----CCACCGGGGATGAATGTCACTG-----                                                                  | mirR    | 23  | 1     |
| -----TCACTGTGGCTGGGCCAA-----                                                                      | morR    | 18  | 1     |

>mmu-mir-877

| TGCTGAGAACTAGAAAAGGTAGAGGAGATGGCGCAGGGACACAAGGTAGGCCTTGCGGGTCTGTGGACCCTTGGACATGTGTCTCTCTCCCTCCTCCAGGTGTATGAGGAACTGCGAG | species | len | rea  |
|------------------------------------------------------------------------------------------------------------------------|---------|-----|------|
| -----GTAGAGGAGATGGCGCAGGGAC-----                                                                                       | morL    | 18  | 1    |
| -----GTAGAGGAGATGGCGCAGGG-----                                                                                         | mirL    | 23  | 122  |
| -----GTAGAGGAGATGGCGCAGGG-----                                                                                         | mirL    | 21  | 33   |
| -----GTAGAGGAGATGGCGCAGGG-----                                                                                         | mirL    | 20  | 30   |
| -----GTAGAGGAGATGGCGCAGG-----                                                                                          | mirL    | 19  | 28   |
| -----GTAGAGGAGATGGCGCAGGGGA-----                                                                                       | mirL    | 22  | 23   |
| -----TAGAGGAGATGGCGCAGG-----                                                                                           | mirL    | 18  | 1    |
| -----TGTCTCTCTCTCCCTCCTCCAA-----                                                                                       | mirR    | 22  | 1468 |

```

-----TGCCTCTTCTCCCTCCTCCC----- mirR 21 1179
-----TCCTCTTCTCCCTCCTCCCAGG----- mirR 22 559
-----TGCCTCTTCTCCCTCCTCC----- mirR 20 546
-----TCCTCTTCTCCCTCCTCCC----- mirR 19 492
-----TGCCTCTTCTCCCTCCTCCCAG----- mirR 23 406
-----TCCTCTTCTCCCTCCTCCCA----- mirR 20 367
-----TCCTCTTCTCCCTCCTCCCAG----- mirR 21 295
-----TGCCTCTTCTCCCTCCTCC----- mirR 19 225
-----TCCTCTTCTCCCTCCTCC----- mirR 18 222
-----TGCCTCTTCTCCCTCCTCCCAGG----- mirR 24 175
-----TGCCTCTTCTCCCTCCT----- mirR 18 122
-----TCCTCTTCTCCCTCCTCCCAGGT----- mirR 23 107
-----GTCCTCTTCTCCCTCCTCCCA----- mirR 21 103
-----GTCCTCTTCTCCCTCCTCCC----- mirR 20 78
-----GTCCTCTTCTCCCTCCTCC----- mirR 19 39
-----CCTCTTCTCCCTCCTCCCAGG----- mirR 21 34
-----GTCCTCTTCTCCCTCCTCCCAG----- mirR 22 29
-----CCTCTTCTCCCTCCTCCCAG----- mirR 20 25
-----CCTCTTCTCCCTCCTCCCA----- mirR 19 25
-----GTCCTCTTCTCCCTCCTCCCAGG----- mirR 23 18
-----CCTCTTCTCCCTCCTCCC----- mirR 18 15
-----TCCTCTTCTCCCTCCTCCCAGGTG----- mirR 24 11
-----GTCCTCTTCTCCCTCCTCC----- mirR 18 11
-----CCTCTTCTCCCTCCTCCCAGGT----- mirR 22 6
-----GTCCTCTTCTCCCTCCTCCCAGGT----- mirR 24 2
-----CCTCTTCTCCCTCCTCCCAGGTGTA----- mirR 25 1
-----GTGTCCTCTTCTCCCTCCTCCCAGGT----- mirR 26 1
-----CCTCTTCTCCCTCCTCCCAGGTG----- mirR 23 1
-----TGTGTCCTCTTCTCCCTCC----- mirR 19 1
-----TGTATGAGGAACTGCGAG morR 18 1

```

>mmu-mir-1-1

```

AACCTACCTGCTTGGGACACATACTTCTTTATATGCCCATATGAACCTGCTAAGCTATGGAATGTAAAGAAGTATGTATTTTCAGGCTAGGAACTCTC species len reads
AACCTACCTGCTTGGGAC----- morL 18 6
-ACCTACCTGCTTGGGACAC----- morL 19 2
AACCTACCTGCTTGGGACA----- morL 19 1
-----ACATACTTCTTTATATGCCCAT----- mirL 22 60
-----ACATACTTCTTTATATGCC----- mirL 20 44
-----ACATACTTCTTTATATGCC----- mirL 19 20
-----ACATACTTCTTTATATGCCCATA----- mirL 23 16
-----ACATACTTCTTTATATGCCCA----- mirL 21 7
-----CACATACTTCTTTATATGCCCA----- mirL 22 1
-----CACATACTTCTTTATATGCCCAT----- mirL 23 1
-----TGAATGTAAAGAAGTATGTAT----- mirR 22 4222
-----TGAATGTAAAGAAGTATGT----- mirR 20 841
-----TGAATGTAAAGAAGTATGTA----- mirR 21 653

```

```
-----GGAATGTAAAGAAGTATGTAT----- mirR 21 265
-----TGGAATGTAAAGAAGTATG----- mirR 19 157
-----TGGAATGTAAAGAAGTATGTATT----- mirR 23 121
-----TGGAATGTAAAGAAGTAT----- mirR 18 76
-----GGAATGTAAAGAAGTATGT----- mirR 19 56
-----GGAATGTAAAGAAGTATGTA----- mirR 20 34
-----TGGAATGTAAAGAAGTATGTATTT----- mirR 24 19
-----GGAATGTAAAGAAGTATGTATT----- mirR 22 16
-----GGAATGTAAAGAAGTATG----- mirR 18 7
-----GGAATGTAAAGAAGTATGTATTTTC----- mirR 24 4
-----GAATGTAAAGAAGTATGTAT----- mirR 20 2
-----ATGGAATGTAAAGAAGTA----- mirR 18 1
-----GGAATGTAAAGAAGTATGTATTT----- mirR 23 1
-----AATGTAAAGAAGTATGTAT----- mirR 19 1
-----ATTTCAGGCTAGGAACTCTC morR 20 1
```

>mmu-mir-1-2

```
AGGAGTGCCTACTCAGAGCACATACTTCTTTATGTACCCATATGAACATTCAGTGCTATGGAATGTAAAGAAGTATGTATTT species len reads
AGGAGTGCCTACTCAGAG----- morL 18 1
-----ACATACTTCTTTATGTACCCAT----- mirL 22 12
-----ACATACTTCTTTATGTACCC----- mirL 20 12
-----ACATACTTCTTTATGTACCCATA----- mirL 23 2
-----TATGAACATTCAGTGCTATGG----- loop 21 3
-----TATGAACATTCAGTGCTA----- loop 18 1
-----TGGAATGTAAAGAAGTATGTAT-- mirR 22 4222
-----TGGAATGTAAAGAAGTATGT---- mirR 20 842
-----TGGAATGTAAAGAAGTATGTA--- mirR 21 653
-----GGAATGTAAAGAAGTATGTAT-- mirR 21 265
-----TGGAATGTAAAGAAGTATG----- mirR 19 158
-----TGGAATGTAAAGAAGTATGTATT- mirR 23 121
-----TGGAATGTAAAGAAGTAT----- mirR 18 76
-----GGAATGTAAAGAAGTATGT---- mirR 19 56
-----GGAATGTAAAGAAGTATGTA--- mirR 20 34
-----TGGAATGTAAAGAAGTATGTATTT mirR 24 19
-----GGAATGTAAAGAAGTATGTATT- mirR 22 16
-----GGAATGTAAAGAAGTATG----- mirR 18 7
-----GAATGTAAAGAAGTATGTAT-- mirR 20 2
-----ATGGAATGTAAAGAAGTA----- mirR 18 1
-----GGAATGTAAAGAAGTATGTATTT mirR 23 1
-----AATGTAAAGAAGTATGTAT-- mirR 19 1
```

>mmu-mir-672

```
TTGAGGTTGGTGTACTGTGTGTGAGTATACATATTTATCACACACAGTCACTATCTTCGAAAG species len reads
-TGAGGTTGGTGTACTGTGTGTGA----- mirL 23 3330
-TGAGGTTGGTGTACTGTGTGTG----- mirL 22 789
-TGAGGTTGGTGTACTGTGTGT----- mirL 21 781
```

```
--TGAGGTTGGTGTACTGTGTG----- mirL 20 373
--TGAGGTTGGTGTACTGTGT----- mirL 19 327
--GAGGTTGGTGTACTGTGTGTGA----- mirL 22 218
--GAGGTTGGTGTACTGTGTGT----- mirL 20 43
--GAGGTTGGTGTACTGTGTGTG----- mirL 21 25
--GAGGTTGGTGTACTGTGTGTGAG----- mirL 23 11
--GAGGTTGGTGTACTGTGT----- mirL 18 9
TTGAGGTTGGTGTACTGTGTGTGA----- mirL 24 1
----GGTGGTGTACTGTGTGTG----- mirL 19 1
-----GTATACATATTTATCACA----- loop 18 1
-----ACACACAGTCACTATCTTCGA--- mirR 21 342
-----ACACACAGTCACTATCTTC----- mirR 19 85
-----ACACACAGTCACTATCTTCG--- mirR 20 73
-----ACACACAGTCACTATCTTCGAA-- mirR 22 41
-----ACACACAGTCACTATCTT----- mirR 18 27
-----ACACACAGTCACTATCTTCGAAA- mirR 23 4
-----ACACACAGTCACTATCTTCGAAAG mirR 24 3
-----TCACACACAGTCACTATCTTC----- mirR 21 2
-----ATCACACACAGTCACTATCT----- mirR 20 1
-----CACACAGTCACTATCTTCGA--- mirR 20 1
-----TCACACACAGTCACTATCTTCGA-- mirR 23 1
-----ATCACACACAGTCACTATCTT----- mirR 21 1
-----ATCACACACAGTCACTAT----- mirR 18 1
-----ACACAGTCACTATCTTCGAAAG- mirR 22 1
-----ATCACACACAGTCACTATC----- mirR 19 1
```

>mmu-mir-702

```
CTTTCTGCAAGAGCGTCCGGGACAAGGTGAGTGGGGTGGTTGGCATGGGTTGCCCATGGGGACTCGACGCTGTGCCACAGCCTCCTGATGTCTCCTCACGCATGCCACCCTTTACCCCGCTCCAGGGCATCTTCTCC
CTTTCTGCAAGAGCGTCCGGGACAAGGT-----
-----CAAGAGCGTCCGGGACAAGG-----
-----GTGAGTGGGGTGGTTGGCATGG-----
-----GTGAGTGGGGTGGTTGGCATGGTT-----
-----TGAGTGGGGTGGTTGGCATGG-----
-----GTGAGTGGGGTGGTTGGCATGGG-----
-----GTGAGTGGGGTGGTTGGC-----
-----TGAGTGGGGTGGTTGGCATG-----
-----AGGTGAGTGGGGTGGTTGG-----
-----GTGAGTGGGGTGGTTGGCATGGGTTGC-----
-----TGAGTGGGGTGGTTGGCAT-----
-----TGCCACCCTTTACCCCGCTCC-----
-----TGCCACCCTTTACCCCGCTC-----
-----TGCCACCCTTTACCCCG-----
-----TGCCACCCTTTACCCCGC-----
-----TGCCACCCTTTACCCCGCTCCAGG-----
-----TGCCACCCTTTACCCCGCT-----
-----TGCCACCCTTTACCCCGCTCCAG-----
```

```

-----GCCCACCCTTTACCCCGCTCCA-----
-----GCCCACCCTTTACCCCGCTCC-----
-----GCCCACCCTTTACCCCGCTC-----
-----GCCCACCCTTTACCCCGCTCCAG-----
-----GCCCACCCTTTACCCCGCT-----
-----ATGCCACCCTTTACCCCGTCC-----
-----GCCCACCCTTTACCCCGC-----
-----GCCCACCCTTTACCCCGTCCAGG-----
-----CATGCCACCCTTTACCC-----
-----CATGCCACCCTTTACCC-----
-----ATGCCACCCTTTACCCCGCTC-----
-----ATGCCACCCTTTACCCCGC-----
-----CATGCCACCCTTTACCCCGTCC-----
-----CATGCCACCCTTTACCCCGTCC-----
-----CATGCCACCCTTTACCCCG-----
-----CCCACCCTTTACCCCGTCC-----
-----ATGCCACCCTTTACCCCGCT-----
-----ATGCCACCCTTTACCCCGTCCA-----
-----CATGCCACCCTTTACCCCGTCCA-----
-----ATGCCACCCTTTACCCCGTCCAG-----
-----CATGCCACCCTTTACCCCGTCCAG-----
-----CCACCCTTTACCCCGTCCAG-----
-----CAGGGCATCTTCTCTCC

```

>mmu-mir-431

| TCCTGCGCGTCTGCGAGGTGCTTTGCAGGCCGTCATGCAGGCCACACTGACGGTAACGTTGCAGGTCGTCTTGCAGGGCTTCTCGCAAGACGACATCTTCATCCCCAACGACGTGC | species | len | reads |
|----------------------------------------------------------------------------------------------------------------------|---------|-----|-------|
| TCCTGCGCGTCTGCGAGGT-----                                                                                             | morL    | 20  | 1     |
| -----TGTCTTGCAGGCCGTCATGCA-----                                                                                      | mirL    | 21  | 728   |
| -----TGTCTTGCAGGCCGTCATGC-----                                                                                       | mirL    | 20  | 489   |
| -----TGTCTTGCAGGCCGTCATGCAG-----                                                                                     | mirL    | 22  | 205   |
| -----TGTCTTGCAGGCCGTCATG-----                                                                                        | mirL    | 19  | 192   |
| -----TGTCTTGCAGGCCGTCAT-----                                                                                         | mirL    | 18  | 127   |
| -----GTCTTGCAGGCCGTCATGCA-----                                                                                       | mirL    | 20  | 77    |
| -----GTCTTGCAGGCCGTCATGC-----                                                                                        | mirL    | 19  | 51    |
| -----GTCTTGCAGGCCGTCATGCAG-----                                                                                      | mirL    | 21  | 24    |
| -----GTCTTGCAGGCCGTCATG-----                                                                                         | mirL    | 18  | 22    |
| -----GTCTTGCAGGCCGTCATGCAGG-----                                                                                     | mirL    | 23  | 8     |
| -----AGGTGTCTTGCAGGCCGTC-----                                                                                        | mirL    | 20  | 3     |
| -----AGGTGTCTTGCAGGCCGTC-----                                                                                        | mirL    | 19  | 1     |
| -----GGCCACACTGACGGTAACGTTGC-----                                                                                    | loop    | 23  | 2     |
| -----GGCCACACTGACGGTAACG-----                                                                                        | loop    | 19  | 1     |
| -----CACACTGACGGTAACGTTGC-----                                                                                       | loop    | 20  | 1     |
| -----CAGGTCGTCTTGCAGGGCTTC-----                                                                                      | mirR    | 21  | 1413  |
| -----CAGGTCGTCTTGCAGGGCTTCT-----                                                                                     | mirR    | 23  | 869   |
| -----CAGGTCGTCTTGCAGGGCTTCT-----                                                                                     | mirR    | 22  | 659   |
| -----TGCAGGTCGTCTTGCAGGGCTTC-----                                                                                    | mirR    | 23  | 277   |

```

-----CAGGTCGTCTTGCAGGGCTT----- mirR 20 207
-----CAGGTCGTCTTGCAGGGC----- mirR 18 173
-----CAGGTCGTCTTGCAGGGCT----- mirR 19 109
-----TGCAGGTCGTCTTGCAGGGC----- mirR 20 106
-----TTGCAGGTCGTCTTGCAGGGCTTC----- mirR 24 47
-----TGCAGGTCGTCTTGCAGGGCTTCT----- mirR 24 39
-----TTGCAGGTCGTCTTGCAGGGC----- mirR 21 35
-----CAGGTCGTCTTGCAGGGCTTCTCG----- mirR 24 32
-----TTGCAGGTCGTCTTGCAGGG----- mirR 20 26
-----TGCAGGTCGTCTTGCAGGG----- mirR 19 25
-----GCAGGTCGTCTTGCAGGGCTTC----- mirR 22 19
-----TGCAGGTCGTCTTGCAGGGCT----- mirR 21 18
-----TGCAGGTCGTCTTGCAGGGCTTCTC----- mirR 25 14
-----TGCAGGTCGTCTTGCAGG----- mirR 18 12
-----TTGCAGGTCGTCTTGCAGGGCT----- mirR 22 12
-----TTGCAGGTCGTCTTGCAGGGCTTCT----- mirR 25 11
-----TTGCAGGTCGTCTTGCAGG----- mirR 19 10
-----TTGCAGGTCGTCTTGCAG----- mirR 18 8
-----AGGTCGTCTTGCAGGGCTTCT----- mirR 21 6
-----GCAGGTCGTCTTGCAGGGC----- mirR 19 5
-----AGGTCGTCTTGCAGGGCTTCTC----- mirR 22 3
-----AGGTCGTCTTGCAGGGCTTC----- mirR 20 2
-----GCAGGTCGTCTTGCAGGGCTT----- mirR 21 1
-----GCAGGTCGTCTTGCAGGGCTTCTC----- mirR 24 1
-----GCAGGTCGTCTTGCAGGGCTTCT----- mirR 23 1
-----GCAGGTCGTCTTGCAGGGCT----- mirR 20 1
-----TCGCAAGACGACATCTTCATCCCCAACGACGTGC morR 34 3
-----TCGCAAGACGACATCTTCATCCCC----- morR 24 2
-----TCTCGCAAGACGACATCTTCA----- morR 21 2
-----TCTCGCAAGACGACATCTTC----- morR 20 1
-----TCGCAAGACGACATCTTCA----- morR 19 1
-----TCGCAAGACGACATCTTCATCCCCAACGA----- morR 29 1

```

>mmu-mir-148a

```

CAAAGTTCTGAGACTCCGACTCTGAGTATGATAGAAGTCAGTGCACACTACAGAACTTTGTCTCTAGAGGCTGTGGTCGCC species len reads
-AAAGTTCTGAGACTCCGACTC----- mirL 23 14
-AAAGTTCTGAGACTCCGACT----- mirL 22 14
-AAAGTTCTGAGACTCCGAC----- mirL 21 13
-AAAGTTCTGAGACTCCG----- mirL 19 6
---GTTCTGAGACTCCGACTC----- mirL 20 6
---GTTCTGAGACTCCGACTCT----- mirL 21 5
-AAAGTTCTGAGACTCCGA----- mirL 20 4
---GTTCTGAGACTCCGACTCTGAG----- mirL 24 2
---GTTCTGAGACTCCGACTCTG----- mirL 22 2
---AGTTCTGAGACTCCGA----- mirL 18 1
CAAAGTTCTGAGACTCCGAC----- mirL 22 1

```

```

----GTTCTGAGACACTCCGAC----- mirL 18 1
CAAAGTTCTGAGACACTCCG----- mirL 20 1
CAAAGTTCTGAGACACTC----- mirL 18 1
-----TGAGTATGATAGAAGTCA----- loop 18 1
-----TCAGTGCCTACAGAACTTTGTC----- mirR 23 2462
-----TCAGTGCCTACAGAACTTTGT----- mirR 22 1481
-----TCAGTGCCTACAGAACTTTG----- mirR 21 935
-----TCAGTGCCTACAGAACTTT----- mirR 20 292
-----TCAGTGCCTACAGAACTT----- mirR 19 173
-----CAGTGCCTACAGAACTTTGT----- mirR 21 168
-----TCAGTGCCTACAGAACTTTGTCT----- mirR 24 81
-----TCAGTGCCTACAGAACT----- mirR 18 71
-----CAGTGCCTACAGAACTTTG----- mirR 20 63
-----CAGTGCCTACAGAACTTTGTC----- mirR 22 45
-----CAGTGCCTACAGAACTTT----- mirR 19 24
-----CAGTGCCTACAGAACTTTGTCT----- mirR 23 9
-----CAGTGCCTACAGAACTT----- mirR 18 5
-----CAGTGCCTACAGAACTTTGTCTC----- mirR 24 2
-----AGTGCCTACAGAACTTTGT----- mirR 20 1
-----GTGCCTACAGAACTTTGT----- mirR 19 1
-----TCTCTAGAGGCTGTGGTCGCC morR 21 1
-----TCTCTAGAGGCTGTGGTC--- morR 18 1

```

>mmu-mir-1843

| Species                                                                                          | len | reads |
|--------------------------------------------------------------------------------------------------|-----|-------|
| CAGCGGTCCTACATGAATATGGAGGCTCTGTCTGACTTAGAATAGCTGGCTGAGTCTGATCGTTCACCTCCATACAACCTTAGACTCTCACTCTAC | 19  | 1     |
| CAGCGGTCCTACATGAATA-----                                                                         | 19  | 1     |
| -----TATGGAGGCTCTGTCTGACTTA-----                                                                 | 23  | 651   |
| -----TATGGAGGCTCTGTCTGACT-----                                                                   | 21  | 581   |
| -----ATGGAGGCTCTGTCTGACTTA-----                                                                  | 22  | 453   |
| -----TATGGAGGCTCTGTCTGA-----                                                                     | 19  | 268   |
| -----TATGGAGGCTCTGTCTGACTT-----                                                                  | 22  | 227   |
| -----ATGGAGGCTCTGTCTGACTT-----                                                                   | 21  | 225   |
| -----TATGGAGGCTCTGTCTGAC-----                                                                    | 20  | 200   |
| -----ATGGAGGCTCTGTCTGACT-----                                                                    | 20  | 192   |
| -----ATGGAGGCTCTGTCTGAC-----                                                                     | 19  | 99    |
| -----ATATGGAGGCTCTGTCTGA-----                                                                    | 20  | 78    |
| -----ATGGAGGCTCTGTCTGA-----                                                                      | 18  | 70    |
| -----ATATGGAGGCTCTGTCTGACT-----                                                                  | 22  | 70    |
| -----ATATGGAGGCTCTGTCTGAC-----                                                                   | 21  | 33    |
| -----TGGAGGCTCTGTCTGACTTA-----                                                                   | 21  | 12    |
| -----AATATGGAGGCTCTGTCTGA-----                                                                   | 21  | 9     |
| -----GGAGGCTCTGTCTGACTTA-----                                                                    | 20  | 8     |
| -----ATATGGAGGCTCTGTCTG-----                                                                     | 19  | 8     |
| -----ATATGGAGGCTCTGTCTGACTT-----                                                                 | 23  | 6     |
| -----AATATGGAGGCTCTGTCTG-----                                                                    | 20  | 5     |
| -----TGGAGGCTCTGTCTGACT-----                                                                     | 19  | 5     |



```

-----TGGAGGTCTCTGTCTGACTTAG----- mirL 22 3
-----GAATATGGAGGTCTCTGTCTGAC----- mirL 23 1
-----GAATATGGAGGTCTCTGTC----- mirL 19 1
-----GGAGGTCTCTGTCTGACTTAG----- mirL 21 1
-----AATATGGAGGTCTCTGTCTGAC----- mirL 22 1
-----GGAGGTCTCTGTCTGACTT----- mirL 19 1
-----TCTGATCGTTCACCTCCATAC----- mirR 21 1126
-----TCTGATCGTTCACCTCCAT----- mirR 19 351
-----TCTGATCGTTCACCTCCATACA----- mirR 22 290
-----TCTGATCGTTCACCTCCATA----- mirR 20 129
-----TCTGATCGTTCACCTCCA----- mirR 18 117
-----CTGATCGTTCACCTCCATAC----- mirR 20 92
-----TCTGATCGTTCACCTCCATACAAC----- mirR 24 44
-----AGTCTGATCGTTCACCTCCAT----- mirR 21 40
-----AGTCTGATCGTTCACCTCCATAC----- mirR 23 39
-----TCTGATCGTTCACCTCCATACAA----- mirR 23 33
-----CTGATCGTTCACCTCCAT----- mirR 18 29
-----GTCTGATCGTTCACCTCCATAC----- mirR 22 28
-----CTGATCGTTCACCTCCATACA----- mirR 21 19
-----GTCTGATCGTTCACCTCCAT----- mirR 20 16
-----AGTCTGATCGTTCACCTCC----- mirR 19 15
-----GTCTGATCGTTCACCTCC----- mirR 18 11
-----CTGATCGTTCACCTCCATA----- mirR 19 11
-----AGTCTGATCGTTCACCTCCA----- mirR 20 8
-----GTCTGATCGTTCACCTCCATA----- mirR 21 6
-----CTGATCGTTCACCTCCATACAA----- mirR 22 4
-----GTCTGATCGTTCACCTCCATACA----- mirR 23 4
-----AGTCTGATCGTTCACCTCCATA----- mirR 22 4
-----AGTCTGATCGTTCACCTCCATACA----- mirR 24 4
-----AGTCTGATCGTTCACCTC----- mirR 18 3
-----GTCTGATCGTTCACCTCCA----- mirR 19 3
-----GAGTCTGATCGTTCACCTCCAT----- mirR 22 2
-----CTGATCGTTCACCTCCATACAAC----- mirR 23 2
-----TGATCGTTCACCTCCATAC----- mirR 19 1
-----CTGATCGTTCACCTCCATACAACCT----- mirR 25 1
-----TGATCGTTCACCTCCATACAACC----- mirR 23 1
-----GAGTCTGATCGTTCACCTCCA----- mirR 21 1
-----GTCTGATCGTTCACCTCCATACAA----- mirR 24 1
-----GAGTCTGATCGTTCACCTCC----- mirR 20 1
-----CAACCTTAGACTCTCACTCTAC morR 22 1

```

>mmu-mir-574

```

CGTGGGTGCGGGCGTGTGAGTGTGTGTGTGAGTGTGTGTGCTCCAAGTCCACGCTCATGCACACACCCACACGCCCGCACGCCCGGTCTGCACCC species len reads
CGTGGGTGCGGGCGTGTGA----- morL 19 1
-----TGAGTGTGTGTGTGTGAGTGTGT----- mirL 23 423
-----TGAGTGTGTGTGTGTGAGTGT----- mirL 21 316

```

```

-----TGAGTGTGTGTGTGTGAGTGTG----- mirL 22 187
-----TGAGTGTGTGTGTGTGAGTGTGTG----- mirL 24 106
-----TGAGTGTGTGTGTGTGAGTGTGTGT----- mirL 25 79
-----GAGTGTGTGTGTGTGAGTGTGT----- mirL 22 35
-----GAGTGTGTGTGTGTGAGTGT----- mirL 20 18
-----GAGTGTGTGTGTGTGAGTGTG----- mirL 21 14
-----GAGTGTGTGTGTGTGAGTGTGTGT----- mirL 24 6
-----GAGTGTGTGTGTGTGAGTGTGTG----- mirL 23 6
-----AGTGTGTGTGTGTGAGTGTGTG----- mirL 22 2
-----GTGAGTGTGTGTGTGTGAGTGTGTG----- mirL 25 2
-----TGTGAGTGTGTGTGTGTGAGTGTG----- mirL 24 1
-----GTGAGTGTGTGTGTGTGAGTGTG----- mirL 23 1
-----GTGTGTGTGTGTGAGTGTGTGTC----- mirL 23 1
-----AGTGTGTGTGTGTGAGTGTGT----- mirL 21 1
-----GTGTGTGTGTGTGAGTGT----- mirL 18 1
-----CACGCTCATGCACACACCCACAC----- mirR 23 1370
-----CACGCTCATGCACACACCCACA----- mirR 22 1277
-----CACGCTCATGCACACACCCAC----- mirR 21 1089
-----CACGCTCATGCACACACCCA----- mirR 20 300
-----CACGCTCATGCACACACCC----- mirR 19 161
-----CACGCTCATGCACACACC----- mirR 18 130
-----ACGCTCATGCACACACCCACA----- mirR 21 18
-----CACGCTCATGCACACACCCACACG----- mirR 24 17
-----ACGCTCATGCACACACCCAC----- mirR 20 8
-----ACGCTCATGCACACACCCACAC----- mirR 22 8
-----CCACGCTCATGCACACACCCAC----- mirR 22 4
-----TCCACGCTCATGCACACAC----- mirR 19 2
-----ACGCTCATGCACACACCC----- mirR 18 1
-----CGTTCATGCACACACCCACACG----- mirR 22 1
-----ACGCTCATGCACACACCCA----- mirR 19 1
-----TCCACGCTCATGCACACACCCAC----- mirR 23 1
-----TCCACGCTCATGCACACACCCACA----- mirR 24 1
-----GTCATGCACACACCCACA----- mirR 19 1
-----CGTTCATGCACACACCCA----- mirR 18 1
-----CCCGCACGCCCGGTCTGCA----- morR 19 1
-----CGCACGCCCGGTCTGCACCC morR 20 1

```

>mmu-mir-344d-3

```

TTTGCAGGGGAAGATTTTCATCAGTCAGGCTAGTGTTATACTCCAGGACTTATCTGGTCTCGGATATAACCACTGCCAGACTGAATGGTGCTAAAGAGAAGGGA species len reads
TTTGCAGGGGAAGATTTTC----- morL 18 1
-----AGTCAGGCTAGTGTTATACTCC----- mirL 23 14
-----AGTCAGGCTAGTGTTATACTC----- mirL 22 10
-----AGTCAGGCTAGTGTTATACTCCA----- mirL 24 7
-----AGTCAGGCTAGTGTTATAC----- mirL 20 3
-----ATCAGTCAGGCTAGTGTTATAC----- mirL 23 3
-----CAGTCAGGCTAGTGTTA----- mirL 18 2

```

```

-----TCAGGCTAGTGGTTATACTC----- mirL 20 1
-----AGTCAGGCTAGTGGTTATACTCCAG----- mirL 25 1
-----TCAGGCTAGTGGTTATACTCCAGGA----- mirL 25 1
-----ATCAGTCAGGCTAGTGGTT----- mirL 19 1
-----ATCAGTCAGGCTAGTGGTTATACTCCAGG----- mirL 29 1
-----ATCAGTCAGGCTAGTGGTTATACTCCAGGACT----- mirL 32 1
-----GATATAACCACTGCCAGACTGA----- mirR 22 4182
-----GATATAACCACTGCCAGACT----- mirR 20 392
-----GATATAACCACTGCCAGAC----- mirR 19 328
-----GATATAACCACTGCCAGACTGAA----- mirR 23 289
-----GATATAACCACTGCCAGACTG----- mirR 21 162
-----GATATAACCACTGCCAGA----- mirR 18 67
-----ATAACCACTGCCAGACTGA----- mirR 19 21
-----GATATAACCACTGCCAGACTGAAT----- mirR 24 8
-----GGATATAACCACTGCCAGACTGA----- mirR 23 7
-----ATATAACCACTGCCAGACTGA----- mirR 21 6
-----GGATATAACCACTGCCAGACT----- mirR 21 4
-----GGATATAACCACTGCCAGA----- mirR 19 2
-----GGATATAACCACTGCCAG----- mirR 18 1
-----GGATATAACCACTGCCAGACTGAA----- mirR 24 1
-----TGGATATAACCACTGCCAGACTGA----- mirR 24 1
-----TATAACCACTGCCAGACTGA----- mirR 20 1
-----CTGGATATAACCACTGCC----- mirR 18 1
-----GGATATAACCACTGCCAGAC----- mirR 20 1
-----ATATAACCACTGCCAGAC----- mirR 18 1
-----TGGTGCTAAAGAGAAGGG----- morR 18 1
-----TGGTGCTAAAGAGAAGGGA morR 19 1

>mmu-mir-344d-2
TAAATTTGTCTGCCAGGGAAGATTTTCATTAGTCTGGTTGCTGGCTATATTCCAGGACTTATCTGGTCTGGATATAACCACTGCCAGACTGAATGGTGCTAAAGAGAAGGGA species len reads
-----TGCTGCCAGGGAAGATT----- morL 18 1
TAAATTTGTCTGCCAGG----- morL 18 1
-----TTGTCTGCCAGGGAAGAT----- morL 18 1
TAAATTTGTCTGCCAGGGA----- morL 19 1
-----ATTTTCATTAGTCTGGTTG----- mirL 18 10
-----ATTTTCATTAGTCTGGTTGC----- mirL 19 2
-----GATATAACCACTGCCAGACTGA----- mirR 22 4182
-----GATATAACCACTGCCAGACT----- mirR 20 392
-----GATATAACCACTGCCAGAC----- mirR 19 328
-----GATATAACCACTGCCAGACTGAA----- mirR 23 289
-----GATATAACCACTGCCAGACTG----- mirR 21 162
-----GATATAACCACTGCCAGA----- mirR 18 67
-----ATAACCACTGCCAGACTGA----- mirR 19 21
-----GATATAACCACTGCCAGACTGAAT----- mirR 24 8
-----GGATATAACCACTGCCAGACTGA----- mirR 23 7
-----ATATAACCACTGCCAGACTGA----- mirR 21 6

```

```

-----GGATATAACCACTGCCAGACT----- mirR 21 4
-----GGATATAACCACTGCCAGA----- mirR 19 2
-----GGATATAACCACTGCCAG----- mirR 18 1
-----GGATATAACCACTGCCAGACTGAA----- mirR 24 1
-----TGGATATAACCACTGCCAGACTGA----- mirR 24 1
-----TATAACCACTGCCAGACTGA----- mirR 20 1
-----CTGGATATAACCACTGCC----- mirR 18 1
-----GGATATAACCACTGCCAGAC----- mirR 20 1
-----ATATAACCACTGCCAGAC----- mirR 18 1
-----TGGTGCTAAAGAGAAGGG----- morR 18 1
-----TGGTGCTAAAGAGAAGGA morR 19 1

```

>mmu-mir-344d-1

```

ATCAGTCAGGCTGCTGGCTATACACCAGGACTTATCTGGTCTGGATATAACCACTGCCAGACTGAAAGGTCTAAAGAGAAGG species len reads
---AGTCAGGCTGCTGGCTATACACC----- mirL 23 2
ATCAGTCAGGCTGCTGGCTATACACCAGGACT----- mirL 32 1
---AGTCAGGCTGCTGGCTATACACCA----- mirL 24 1
---AGTCAGGCTGCTGGCTATAC----- mirL 20 1
-----GATATAACCACTGCCAGACTGA----- mirR 22 4182
-----GATATAACCACTGCCAGACT----- mirR 20 392
-----GATATAACCACTGCCAGAC----- mirR 19 328
-----GATATAACCACTGCCAGACTGAA----- mirR 23 289
-----GATATAACCACTGCCAGACTG----- mirR 21 162
-----GATATAACCACTGCCAGA----- mirR 18 67
-----ATAACCACTGCCAGACTGA----- mirR 19 21
-----GATATAACCACTGCCAGACTGAAA----- mirR 24 11
-----GGATATAACCACTGCCAGACTGA----- mirR 23 7
-----ATATAACCACTGCCAGACTGA----- mirR 21 6
-----GGATATAACCACTGCCAGACT----- mirR 21 4
-----GGATATAACCACTGCCAGA----- mirR 19 2
-----GGATATAACCACTGCCAGAC----- mirR 20 1
-----GGATATAACCACTGCCAGACTGAA----- mirR 24 1
-----TGGATATAACCACTGCCAGACTGA----- mirR 24 1
-----TATAACCACTGCCAGACTGA----- mirR 20 1
-----ATATAACCACTGCCAGAC----- mirR 18 1
-----CTGGATATAACCACTGCC----- mirR 18 1
-----GGATATAACCACTGCCAG----- mirR 18 1
-----AAGGTCTAAAGAGAAGG morR 18 1

```

>mmu-mir-219-1

```

CGTCCCGGGCCGCGGCTCCTGATTGTCCAAACGCAATTCTCGAGTCTCTGGCTCCGGCCGAGAGTTGCGTCTGGACGTCCCGAGCCGCGCCCAACC species len reads
---TCCCGGGCCGCGGCTCCT----- morL 18 101
---CCCGGGCCGCGGCTCCTG----- morL 18 24
CGTCCCGGGCCGCGGCTC----- morL 18 2
---CCCGGGCCGCGGCTCCTGA----- morL 18 1
CGTCCCGGGCCGCGGCTCC----- morL 19 1

```

```

-----TGATTGTCCAAACGCAATTCT----- mirL 21 1267
-----TGATTGTCCAAACGCAATTCTC----- mirL 22 1147
-----TGATTGTCCAAACGCAATTC----- mirL 20 1040
-----TGATTGTCCAAACGCAATT----- mirL 19 872
-----TGATTGTCCAAACGCAAT----- mirL 18 468
-----GATTGTCCAAACGCAATTCT----- mirL 20 120
-----GATTGTCCAAACGCAATTCTC----- mirL 21 100
-----GATTGTCCAAACGCAATT----- mirL 18 87
-----GATTGTCCAAACGCAATTC----- mirL 19 86
-----GATTGTCCAAACGCAATTCTCG----- mirL 22 48
-----CTGATTGTCCAAACGCAAT----- mirL 19 1
-----TTGTCCAAACGCAATTCTC----- mirL 19 1
-----TCGAGTCTCTGGCTCCGG----- loop 18 3
-----TCGAGTCTCTGGCTCCGGC----- loop 19 1
-----AGAGTTGCGTCTGGACGTCCCG----- mirR 22 14
-----AGAGTTGCGTCTGGACGTCCC----- mirR 21 13
-----AGAGTTGCGTCTGGACGTCC----- mirR 20 7
-----AGAGTTGCGTCTGGACGTCCCGAGC----- mirR 25 4
-----AGAGTTGCGTCTGGACGTCCCGA----- mirR 23 3
-----AGAGTTGCGTCTGGACGTCCCGAG----- mirR 24 3
-----CCGAGAGTTGCGTCTGGA----- mirR 18 1
-----GAGAGTTGCGTCTGGACGTCC----- mirR 21 1
-----AGAGTTGCGTCTGGACGT----- mirR 18 1
-----AGCCGCCGCCCCCAAACC morR 18 1

```

>mmu-mir-146b

```

CTGAGAACTGAATTCATAGGCTGTGAGCTCTAGCAGACGCCCTAGGGACTCAGTTCTGGTGCC species len reads
-TGAGAACTGAATTCATAGGC----- mirL 21 1904
-TGAGAACTGAATTCATAGGCT----- mirL 22 1050
-TGAGAACTGAATTCATAGGCTGT----- mirL 24 734
-TGAGAACTGAATTCATAGGCTGTG----- mirL 25 591
-TGAGAACTGAATTCATAGGCTG----- mirL 23 550
--GAGAACTGAATTCATAGGCTGT----- mirL 23 104
--GAGAACTGAATTCATAGGC----- mirL 20 101
--GAGAACTGAATTCATAGGCT----- mirL 21 66
--GAGAACTGAATTCATAGGCTG----- mirL 22 51
--GAGAACTGAATTCATAG----- mirL 18 23
CTGAGAACTGAATTCATAGGC----- mirL 22 8
CTGAGAACTGAATTCATAG----- mirL 20 2
---AGAACTGAATTCATAGGC----- mirL 19 2
---GAACTGAATTCATAGGCTGT----- mirL 21 1
---AGAACTGAATTCATAGGCT----- mirL 20 1
CTGAGAACTGAATTCATAG----- mirL 21 1
-----GGCTGTGAGCTCTAGCAGA----- loop 19 1
-----GGCTGTGAGCTCTAGCAGC----- loop 21 1
-----GCCCTAGGGACTCAGTTCTGGT--- mirR 22 25

```

```
-----GCCCTAGGGACTCAGTTCTGGTG-- mirR 23 15
-----GCCCTAGGGACTCAGTTCTGG---- mirR 21 14
-----GCCCTAGGGACTCAGTTC----- mirR 18 7
-----GCCCTAGGGACTCAGTTCTG---- mirR 20 6
-----GCCCTAGGGACTCAGTTCT---- mirR 19 5
-----GCCCTAGGGACTCAGTTCTGGTGCC mirR 25 4
-----CCCTAGGGACTCAGTTCTGGTGCC- mirR 23 1
```

>mmu-mir-199b

```
CTACCCAGTGTTTAGACTACCTGTTTCAGGACTCCCAAATTGTACAGTAGTCTGCACATTGGTTAGGCTGGGCTGGGTTAGACCCTCGGCACCGTCTGCTGGAGAGCCGCACCAACCCCTGCTGTCTTCTAGAA specie
---CCCAGTGTTTAGACTACCTGTTTC----- mirL 2
---CCCAGTGTTTAGACTACCTGTTTC----- mirL 1
---CCCAGTGTTTAGACTACCTGTTTC----- mirL 2
---CCCAGTGTTTAGACTACCTGTTTC----- mirL 2
---CCCAGTGTTTAGACTACCTGTTTC----- mirL 1
---CCCAGTGTTTAGACTACCTGTTTC----- mirL 1
---CCAGTGTTTAGACTACCTGTTTC----- mirL 2
---CAGTGTTTAGACTACCTGTTTC----- mirL 2
---CCAGTGTTTAGACTACCTGTTTC----- mirL 2
CTACCCAGTGTTTAGACTACCTGTTTC----- mirL 2
CTACCCAGTGTTTAGACTACCTGTTTC----- mirL 2
-----AGTGTTTAGACTACCTGTTTC----- mirL 2
CTACCCAGTGTTTAGACTACCTGTTTC----- mirL 2
-----AGTGTTTAGACTACCTGTTTC----- mirL 1
-----AGTGTTTAGACTACCTGTTTC----- mirL 2
-----AGTGTTTAGACTACCTGTTTC----- mirL 1
-----AGTGTTTAGACTACCTGTTTC----- mirL 2
```

>mmu-mir-1983

```
AGAAAGCATGCTCCAGTGGCGCAATCGGTTAGCGCGGCTACTTATACAGCAGTATATGTGCGGGTATGCCGAGGTTGTGAGTTCGAGCCTCACCTGGAGCATGTTTCTTCCCTTTCGGCTCAAACAC species
--AAAGCATGCTCCAGTGGCGCAATC----- mirL 24 5
--AAAGCATGCTCCAGTGGCGCAATC----- mirL 20 3
-GAAAGCATGCTCCAGTGGCGCAATC----- mirL 21 2
-GAAAGCATGCTCCAGTGGCGCAATC----- mirL 20 2
--AAAGCATGCTCCAGTGGCGCAATC----- mirL 21 2
--AAAGCATGCTCCAGTGGCGCAATC----- mirL 19 2
--AAAGCATGCTCCAGTGGCGCAATC----- mirL 18 1
-GAAAGCATGCTCCAGTGGCGCAATC----- mirL 22 1
--AAGCATGCTCCAGTGGCGCAATC----- mirL 23 1
-GAAAGCATGCTCCAGTGGCGCAATC----- mirL 25 1
----AGCATGCTCCAGTGGCGCAATCGGTTAGCGC----- mirL 31 9
-GAAAGCATGCTCCAGTGGCGCAATC----- mirL 18 9
----AAGCATGCTCCAGTGGCGCAATCGGTTAGCGC----- mirL 32 7
----AGCATGCTCCAGTGGCGCAATCGGTTAGCGC----- mirL 21 5
----GCATGCTCCAGTGGCGCAATCGGTTAGCGC----- mirL 25 5
----AGCATGCTCCAGTGGCGCAATCGGTTAGCGC----- mirL 20 3
AGAAAGCATGCTCCAGTGGCGCAATC----- mirL 22 3
----AGCATGCTCCAGTGGCGCAATCGGTTAGCGC----- mirL 18 3
--AAGCATGCTCCAGTGGCGCAATC----- mirL 19 2
```

```
---AAGCATGCTCCAGTGGCG--------mirL 18 2
---AGCATGCTCCAGTGGCGCAATC-----mirL 22 2
---AAGCATGCTCCAGTGGCGCA-----mirL 20 2
-----GCATGCTCCAGTGGCGCAATCGGTTAGC-----mirL 28 1
AGAAAGCATGCTCCAGTGGCGCAATCGGTTAGC-----mirL 33 1
AGAAAGCATGCTCCAGTG-----mirL 18 1
AGAAAGCATGCTCCAGTGGCGCA-----mirL 23 1
-----GCATGCTCCAGTGGCGCAA-----mirL 19 1
-----GCATGCTCCAGTGGCGCAATCGGTTAGCGC-----mirL 30 1
-----GCATGCTCCAGTGGCGCAATC-----mirL 21 1
AGAAAGCATGCTCCAGTGGC-----mirL 20 1
-----CTCACCTGGAGCATGTTTC-----mirR 20 1
-----CTCACCTGGAGCATGTTTCT-----mirR 21 1
-----CTCACCTGGAGCATGTTT-----mirR 19 7
-----CTCACCTGGAGCATGTTT-----mirR 18 3
-----TCACCTGGAGCATGTTTC-----mirR 19 2
-----TCACCTGGAGCATGTTTCTT-----mirR 21 1
-----CTCACCTGGAGCATGTTTCTTC-----mirR 23 1
-----TCACCTGGAGCATGTTTCT-----mirR 20 1
-----CTCACCTGGAGCATGTTTCTT-----mirR 22 1
-----TCACCTGGAGCATGTTTCTTC-----mirR 22 9
-----TCACCTGGAGCATGTTT-----mirR 18 4
-----CTCACCTGGAGCATGTTTCTTCC-----mirR 24 3
-----TCACCTGGAGCATGTTTCTTCC-----mirR 23 3
-----ACCTGGAGCATGTTTCTTCCC-----mirR 22 2
-----GCCTCACCTGGAGCATGT-----mirR 18 2
-----CCTCACCTGGAGCATGTTTC-----mirR 21 1
-----TCACCTGGAGCATGTTTCTTCCC-----mirR 24 1
-----CCTCACCTGGAGCATGTTT-----mirR 20 9
-----ACCTGGAGCATGTTTCT-----mirR 18 8
-----CACCTGGAGCATGTTTCTT-----mirR 20 8
-----ACCTGGAGCATGTTTCTT-----mirR 19 7
-----CCTCACCTGGAGCATGTTTCT-----mirR 22 7
-----ACCTGGAGCATGTTTCTTCC-----mirR 21 7
-----CACCTGGAGCATGTTTC-----mirR 18 7
-----CCTCACCTGGAGCATGTTT-----mirR 19 6
-----CCTCACCTGGAGCATGTT-----mirR 18 5
-----ACCTGGAGCATGTTTCTTCC-----mirR 20 3
-----CACCTGGAGCATGTTTCTTCC-----mirR 21 3
-----AGCCTCACCTGGAGCATGT-----mirR 19 2
-----CACCTGGAGCATGTTTCT-----mirR 19 2
-----CACCTGGAGCATGTTTCTTCC-----mirR 22 2
-----AGCCTCACCTGGAGCATGTTT-----mirR 21 2
-----GCCTCACCTGGAGCATGTTTC-----mirR 22 1
-----CACCTGGAGCATGTTTCTTCCC-----mirR 23 1
-----AGCCTCACCTGGAGCATGTTTC-----mirR 23 1
```

```
-----GCCTCACCTGGAGCATGTT----- mirR 19 1
-----CCTTTCCGCCTCAAACAC morR 18 3
-----CCCTTTCCGCCTCAAACAC morR 19 1
```

>mmu-mir-18a

| Species | len  | reads |
|---------|------|-------|
| mirL 22 | 1232 |       |
| mirL 21 | 1033 |       |
| mirL 23 | 653  |       |
| mirL 19 | 589  |       |
| mirL 20 | 535  |       |
| mirL 22 | 147  |       |
| mirL 20 | 131  |       |
| mirL 21 | 87   |       |
| mirL 18 | 82   |       |
| mirL 19 | 58   |       |
| mirL 20 | 1    |       |
| mirL 19 | 1    |       |
| loop    | 18   | 2     |
| loop    | 20   | 1     |
| mirR 21 | 40   |       |
| mirR 20 | 11   |       |
| mirR 22 | 9    |       |
| mirR 23 | 5    |       |
| mirR 21 | 3    |       |
| mirR 25 | 2    |       |
| mirR 24 | 2    |       |
| mirR 22 | 1    |       |
| mirR 19 | 1    |       |

>mmu-mir-501

| Species | len  | reads |
|---------|------|-------|
| morL 18 | 2    |       |
| mirL 20 | 1354 |       |
| mirL 22 | 371  |       |
| mirL 21 | 326  |       |
| mirL 19 | 208  |       |
| mirL 25 | 111  |       |
| mirL 19 | 1    |       |
| mirL 19 | 1    |       |
| mirL 24 | 1    |       |
| loop    | 18   | 1     |
| mirR 22 | 925  |       |
| mirR 21 | 773  |       |
| mirR 23 | 264  |       |
| mirR 20 | 120  |       |



```

-----AATGCACCCGGGCAAGGAT----- mirR 19 61
-----AATGCACCCGGGCAAGGATTGGG----- mirR 24 42
-----AATGCACCCGGGCAAGGA----- mirR 18 33
-----GCAATGCACCCGGGCAAGGATTT----- mirR 23 6
-----ATGCACCCGGGCAAGGATTT----- mirR 20 5
-----ATGCACCCGGGCAAGGATTGGG----- mirR 23 2
-----ATGCACCCGGGCAAGGATTTG----- mirR 21 2
-----GCAATGCACCCGGGCAAGG----- mirR 19 2
-----TGCACCCGGGCAAGGATTTG----- mirR 20 2
-----TGCAATGCACCCGGGCAAGGA----- mirR 21 1
-----TGCACCCGGGCAAGGATTT----- mirR 19 1
-----TGCACCCGGGCAAGGATTTGG----- mirR 21 1
-----TGCACCCGGGCAAGGATTTGGGG----- mirR 23 1
-----GCAATGCACCCGGGCAAGGATT----- mirR 22 1
-----TGCAATGCACCCGGGCAAGGATTT----- mirR 24 1
-----CAATGCACCCGGGCAAGGATTTG----- mirR 23 1
-----GCACCCGGGCAAGGATTTG----- mirR 19 1
-----ATGCACCCGGGCAAGGATTTGG----- mirR 22 1
-----TGGGGAAGGTGAGCCTGATC-- morR 20 1
-----GGGAAGGTGAGCCTGATCTG morR 20 1

```

>mmu-mir-134

```

TGCCAGCACCATT CAGGGTGTGTGACTGGTTGACCAGAGGGGCGTGCACCTCTGTTACCCTGTGGGCCACCTAGTCACCAACCCTCAGCATCAATTCCACTCAAAGAAGAC species len reads
----AGCACCATT CAGGGTGTGT----- morL 19 88
----AGCACCATT CAGGGTGTGT----- morL 18 21
----CAGCACCATT CAGGGTGTGT----- morL 20 16
----CAGCACCATT CAGGGTGTGT----- morL 19 3
----CAGCACCATT CAGGGTGTGT----- morL 18 3
TGCCAGCACCATT CAGGGTG----- morL 20 1
-GCCAGCACCATT CAGGGT----- morL 18 1
-GCCAGCACCATT CAGGGTG----- morL 19 1
-----TGTGACTGGTTGACCAGAGGGG----- mirL 23 1102
-----TGTGACTGGTTGACCAGAGG----- mirL 20 655
-----TGTGACTGGTTGACCAGAGGG----- mirL 21 494
-----TGTGACTGGTTGACCAGAGGGG----- mirL 22 440
-----TGTGACTGGTTGACCAGAG----- mirL 19 391
-----GTGACTGGTTGACCAGAGGGG----- mirL 22 113
-----GTGACTGGTTGACCAGAGG----- mirL 19 69
-----GTGACTGGTTGACCAGAGGGG----- mirL 21 62
-----GTGACTGGTTGACCAGAGGG----- mirL 20 41
-----GTGACTGGTTGACCAGAG----- mirL 18 21
-----GTGTGACTGGTTGACCAGAGG----- mirL 22 5
-----GTGTGACTGGTTGACCAGAG----- mirL 20 4
-----GTGTGACTGGTTGACCAGAGG----- mirL 21 3
-----GTGTGACTGGTTGACCAG----- mirL 18 1
-----GTGTGACTGGTTGACCAGAGGG----- mirL 23 1

```

```

-----TGACTGGTTGACCAGAGGGG----- mirL 20 1
-----GCGTGCACTCTGTTCAACC----- loop 18 1
-----CTGTGGGCCACCTAGTCACCA----- mirR 21 370
-----CTGTGGGCCACCTAGTCACCAAC----- mirR 23 161
-----CTGTGGGCCACCTAGTCACC----- mirR 20 147
-----CTGTGGGCCACCTAGTCACC----- mirR 19 82
-----CTGTGGGCCACCTAGTCACCAA----- mirR 22 76
-----TGTGGGCCACCTAGTCACCA----- mirR 20 14
-----TGTGGGCCACCTAGTCACCAA----- mirR 21 12
-----CTGTGGGCCACCTAGTCACCAACC----- mirR 24 9
-----CTGTGGGCCACCTAGTCA----- mirR 18 9
-----TGTGGGCCACCTAGTCACC----- mirR 19 8
-----TGTGGGCCACCTAGTCACCAAC----- mirR 22 5
-----CCTGTGGGCCACCTAGTCACCA----- mirR 22 5
-----CCTGTGGGCCACCTAGTCACC----- mirR 20 4
-----CCTGTGGGCCACCTAGTCACCAACC----- mirR 25 4
-----TGTGGGCCACCTAGTCACCAACC----- mirR 23 4
-----CCTGTGGGCCACCTAGTCACC----- mirR 21 3
-----CCTGTGGGCCACCTAGTCACCAA----- mirR 23 2
-----GTGGGCCACCTAGTCACCAA----- mirR 20 1
-----CCTGTGGGCCACCTAGTCA----- mirR 19 1
-----CCTGTGGGCCACCTAGTC----- mirR 18 1
-----TGGGCCACCTAGTCACCAA----- mirR 19 1
-----TGTGGGCCACCTAGTCACC----- mirR 18 1
-----CCCTGTGGGCCACCTAGT----- mirR 18 1
-----CCCTCAGCATCAATTCCACTCAAAGAAGAC morR 30 1
-----CCAACCCTCAGCATCAAT----- morR 18 1

```

>mmu-mir-1298

| Sequence                                                                       | Species | len | reads |
|--------------------------------------------------------------------------------|---------|-----|-------|
| GAGTTCATTCGGCTGTCCAGATGTACCCAAGTACCCTGTTATTGGCAATACATACATCTGGGCAACTGATTGAACTTT | mirL    | 23  | 1311  |
| ---TTCATTCGGCTGTCCAGATGTAC-----                                                | mirL    | 21  | 1189  |
| ---TTCATTCGGCTGTCCAGATGT-----                                                  | mirL    | 22  | 581   |
| ---TTCATTCGGCTGTCCAGATG-----                                                   | mirL    | 20  | 359   |
| ---TTCATTCGGCTGTCCAGAT-----                                                    | mirL    | 19  | 220   |
| ---TCATTCGGCTGTCCAGATGT-----                                                   | mirL    | 20  | 141   |
| ---TCATTCGGCTGTCCAGATGTAC-----                                                 | mirL    | 22  | 113   |
| ---TCATTCGGCTGTCCAGATGTA-----                                                  | mirL    | 21  | 83    |
| ---TCATTCGGCTGTCCAGATG-----                                                    | mirL    | 19  | 43    |
| ---TCATTCGGCTGTCCAGAT-----                                                     | mirL    | 18  | 32    |
| ---CATTCGGCTGTCCAGATGTAC-----                                                  | mirL    | 21  | 1     |
| GAGTTCATTCGGCTGTCCA-----                                                       | mirL    | 19  | 1     |
| -----CATCTGGGCAACTGATTGA-----                                                  | mirR    | 19  | 78    |
| -----CATCTGGGCAACTGATTGAACT--                                                  | mirR    | 22  | 69    |
| -----CATCTGGGCAACTGATTGAAC---                                                  | mirR    | 21  | 27    |
| -----CATCTGGGCAACTGATTGAA---                                                   | mirR    | 20  | 14    |

```

-----CATCTGGGCAACTGATTGAACTT- mirR 23 14
-----CATCTGGGCAACTGATTG----- mirR 18 8
-----TACATCTGGGCAACTGATTGA----- mirR 21 5
-----ACATCTGGGCAACTGATTGAAC--- mirR 22 2
-----ATCTGGGCAACTGATTGAACTT- mirR 22 1
-----ATACATCTGGGCAACTGAT----- mirR 19 1
-----ATACATCTGGGCAACTGATTG----- mirR 21 1
-----CATCTGGGCAACTGATTGAACTTT mirR 24 1
-----ATCTGGGCAACTGATTGAAC--- mirR 20 1
-----ACATCTGGGCAACTGATTGAAC-- mirR 23 1
-----CTGGGCAACTGATTGAAC--- mirR 18 1
-----ATCTGGGCAACTGATTGAA----- mirR 19 1
-----TACATCTGGGCAACTGATTGAAC--- mirR 23 1
-----ATCTGGGCAACTGATTGAAC-- mirR 21 1
-----ATACATCTGGGCAACTGATT----- mirR 20 1

```

>mmu-mir-299

```

TCACGCGTACTTGAAGAAATGGTTTACCGTCCCACATACATTTGAGTATGTATGTGGGACGGTAAACCGCTTCT species len reads
TCACGCGTACTTGAAGAAATG----- morL 22 1
-----TGGTTTACCGTCCCACATAC----- mirL 20 1212
-----TGGTTTACCGTCCCACATACAT-- mirL 22 889
-----TGGTTTACCGTCCCACATACA----- mirL 21 382
-----TGGTTTACCGTCCCACAT----- mirL 18 331
-----TGGTTTACCGTCCCACATA----- mirL 19 249
-----ATGGTTTACCGTCCCACATAC----- mirL 21 96
-----GGTTTACCGTCCCACATAC----- mirL 19 64
-----GGTTTACCGTCCCACATACAT-- mirL 21 52
-----ATGGTTTACCGTCCCACATACA----- mirL 22 28
-----ATGGTTTACCGTCCCACAT----- mirL 19 27
-----ATGGTTTACCGTCCCACATA----- mirL 20 20
-----GGTTTACCGTCCCACATACA----- mirL 20 14
-----GGTTTACCGTCCCACATA----- mirL 18 10
-----ATGGTTTACCGTCCCACA----- mirL 18 8
-----GTTTACCGTCCCACATACA----- mirL 19 2
-----AATGGTTTACCGTCCCACATAC----- mirL 22 2
-----AATGGTTTACCGTCCCACA----- mirL 19 1
-----GTTTACCGTCCCACATACAT-- mirL 20 1
-----TTTACCGTCCCACATACATT----- mirL 20 1
-----TATGTGGGACGGTAAACCGCTTC- mirR 23 201
-----TATGTGGGACGGTAAACCGCT-- mirR 21 166
-----TATGTGGGACGGTAAACCGCTT-- mirR 22 121
-----TATGTGGGACGGTAAACCGC--- mirR 20 64
-----TATGTGGGACGGTAAACC----- mirR 18 61
-----ATGTGGGACGGTAAACCGCTT-- mirR 21 37
-----TATGTGGGACGGTAAACCG--- mirR 19 29
-----GTATGTGGGACGGTAAACCGCT-- mirR 22 21

```

```

-----ATGTGGGACGGTAAACCGCT--- mirR 20 17
-----TATGTGGGACGGTAAACCGCTTCT mirR 24 14
-----ATGTGGGACGGTAAACCGC---- mirR 19 13
-----GTATGTGGGACGGTAAAC----- mirR 18 11
-----ATGTGGGACGGTAAACCGCTTC- mirR 22 9
-----GTATGTGGGACGGTAAACCC----- mirR 19 9
-----GTATGTGGGACGGTAAACCGC---- mirR 21 8
-----ATGTGGGACGGTAAACCG----- mirR 18 7
-----GTATGTGGGACGGTAAACCGCTT-- mirR 23 3
-----ATGTGGGACGGTAAACCGCTTCT mirR 23 2
-----GTATGTGGGACGGTAAACCG----- mirR 20 1

```

>mmu-mir-148b

| Sequence                                                         | species | len | reads |
|------------------------------------------------------------------|---------|-----|-------|
| TGAAGTTCTGTTATACACTCAGGCTGTGGCTCTGAAAGTCAGTGCATCACAGAACCTTTGTCTC | mirL    | 23  | 113   |
| -GAAGTTCTGTTATACACTCAGGC-----                                    | mirL    | 19  | 42    |
| -GAAGTTCTGTTATACACTC-----                                        | mirL    | 21  | 24    |
| -GAAGTTCTGTTATACACTCA-----                                       | mirL    | 20  | 20    |
| -GAAGTTCTGTTATACACTCAGGCT-----                                   | mirL    | 24  | 19    |
| TGAAGTTCTGTTATACACTCA-----                                       | mirL    | 21  | 4     |
| --AAGTTCTGTTATACACTCAG-----                                      | mirL    | 20  | 3     |
| --AAGTTCTGTTATACACTC-----                                        | mirL    | 18  | 2     |
| TGAAGTTCTGTTATACACTC-----                                        | mirL    | 20  | 2     |
| ---AGTTCTGTTATACACTCAGGC-----                                    | mirL    | 21  | 1     |
| --AAGTTCTGTTATACACTCAGGC-----                                    | mirL    | 22  | 1     |
| --AAGTTCTGTTATACACTCA-----                                       | mirL    | 19  | 1     |
| -----GGCTGTGGCTCTGAAAGT-----                                     | loop    | 18  | 1     |
| -----TCAGTGCATCACAGAACCTTTGTCT--                                 | mirR    | 23  | 1473  |
| -----TCAGTGCATCACAGAACCTTTG----                                  | mirR    | 21  | 835   |
| -----TCAGTGCATCACAGAACCTTTGT---                                  | mirR    | 22  | 765   |
| -----TCAGTGCATCACAGAACCTTT-----                                  | mirR    | 20  | 284   |
| -----TCAGTGCATCACAGAACCTT-----                                   | mirR    | 19  | 203   |
| -----CAGTGCATCACAGAACCTTTGT---                                   | mirR    | 21  | 95    |
| -----TCAGTGCATCACAGAACCTTTGTCT-                                  | mirR    | 24  | 57    |
| -----CAGTGCATCACAGAACCTTTG----                                   | mirR    | 20  | 45    |
| -----TCAGTGCATCACAGAACCT-----                                    | mirR    | 18  | 36    |
| -----CAGTGCATCACAGAACCTTTGTCT--                                  | mirR    | 22  | 30    |
| -----CAGTGCATCACAGAACCTTT-----                                   | mirR    | 19  | 25    |
| -----CAGTGCATCACAGAACCTTTGTCTC                                   | mirR    | 24  | 6     |
| -----CAGTGCATCACAGAACCTT-----                                    | mirR    | 18  | 6     |
| -----AGTGCATCACAGAACCTTTGT---                                    | mirR    | 20  | 3     |
| -----CAGTGCATCACAGAACCTTTGTCT-                                   | mirR    | 23  | 2     |
| -----GTCAGTGCATCACAGAACCTT-----                                  | mirR    | 20  | 2     |
| -----GTGCATCACAGAACCTTTGTCT--                                    | mirR    | 20  | 1     |
| -----AGTGCATCACAGAACCTTT-----                                    | mirR    | 18  | 1     |
| -----GTGCATCACAGAACCTTTG----                                     | mirR    | 18  | 1     |

>mmu-mir-203

| Sequence                                                                      | species | len | reads |
|-------------------------------------------------------------------------------|---------|-----|-------|
| AGTGGTTCCTTGACAGTTCAACAGTCTGTAGCACAATTGTGAAATGTTTAGGACCAGTACCCGGCGCGCACGGCGGC | mirL    | 22  | 9     |
| AGTGGTTCCTTGACAGTTCAACA-----                                                  | mirL    | 21  | 5     |
| AGTGGTTCCTTGACAGTTCAAC-----                                                   | mirL    | 19  | 5     |
| AGTGGTTCCTTGACAGTTCA-----                                                     | mirL    | 20  | 4     |
| --TGGTTCCTTGACAGTTCAACAGT-----                                                | mirL    | 22  | 1     |
| AGTGGTTCCTTGACAGTTCAACAG-----                                                 | mirL    | 23  | 1     |
| -----GTGAAATGTTTAGGACCAGTAC-----                                              | mirR    | 22  | 1479  |
| -----TGAAATGTTTAGGACCAGTAC-----                                               | mirR    | 21  | 564   |
| -----GTGAAATGTTTAGGACCAGTAC-----                                              | mirR    | 21  | 516   |
| -----GTGAAATGTTTAGGACCAGTAC-----                                              | mirR    | 19  | 507   |
| -----GTGAAATGTTTAGGACCAGTAC-----                                              | mirR    | 20  | 342   |
| -----TGAAATGTTTAGGACCAGTAC-----                                               | mirR    | 20  | 108   |
| -----GTGAAATGTTTAGGACCAGTAC-----                                              | mirR    | 23  | 93    |
| -----GAAATGTTTAGGACCAGTAC-----                                                | mirR    | 20  | 84    |
| -----TGAAATGTTTAGGACCAGTAC-----                                               | mirR    | 22  | 60    |
| -----GTGAAATGTTTAGGACCAGTAC-----                                              | mirR    | 18  | 49    |
| -----GTGAAATGTTTAGGACCAGTAC-----                                              | mirR    | 25  | 36    |
| -----TGAAATGTTTAGGACCAGTAC-----                                               | mirR    | 19  | 32    |
| -----TGAAATGTTTAGGACCAGTAC-----                                               | mirR    | 18  | 30    |
| -----TGAAATGTTTAGGACCAGTAC-----                                               | mirR    | 23  | 23    |
| -----TGTGAAATGTTTAGGACCAGTAC-----                                             | mirR    | 22  | 15    |
| -----TGTGAAATGTTTAGGACCAGTAC-----                                             | mirR    | 23  | 13    |
| -----GAAATGTTTAGGACCAGTAC-----                                                | mirR    | 19  | 11    |
| -----TGTGAAATGTTTAGGACCAGTAC-----                                             | mirR    | 21  | 8     |
| -----GAAATGTTTAGGACCAGTAC-----                                                | mirR    | 21  | 6     |
| -----TGTGAAATGTTTAGGACCAGTAC-----                                             | mirR    | 20  | 4     |
| -----GAAATGTTTAGGACCAGTAC-----                                                | mirR    | 18  | 3     |
| -----TGAAATGTTTAGGACCAGTAC-----                                               | mirR    | 25  | 2     |
| -----GAAATGTTTAGGACCAGTAC-----                                                | mirR    | 22  | 2     |
| -----AAATGTTTAGGACCAGTAC-----                                                 | mirR    | 18  | 1     |
| -----TGTGAAATGTTTAGGACCAGTAC-----                                             | mirR    | 25  | 1     |
| -----GACCCGGCGCGCACGGCGGC-----                                                | morR    | 20  | 1     |
| -----CCCGCGCGCACGGCGGC-----                                                   | morR    | 18  | 1     |

>mmu-mir-539

| Sequence                                                                          | species | len | reads |
|-----------------------------------------------------------------------------------|---------|-----|-------|
| GCTACTGTTTCATACTTGAGGAGAAATTATCCTTGGTGTGTTGGCTCTTTTGGATGAATCATAAAGGATAATTTCTTTTGA | morL    | 18  | 2     |
| GCTACTGTTTCATACTTG-----                                                           | mirL    | 22  | 2338  |
| -----GGAGAAATTATCCTTGGTGTGT-----                                                  | mirL    | 23  | 658   |
| -----GGAGAAATTATCCTTGGTGTGT-----                                                  | mirL    | 21  | 405   |
| -----GGAGAAATTATCCTTGGTGTGT-----                                                  | mirL    | 20  | 380   |
| -----GGAGAAATTATCCTTGGTGTGT-----                                                  | mirL    | 24  | 186   |
| -----AGGAGAAATTATCCTTGGTGTGT-----                                                 | mirL    | 23  | 2     |

```

-----AGGAGAAATTATCCTTGGTGTG----- mirL 22 1
-----AGGAGAAATTATCCTTGGTGTGTT----- mirL 24 1
-----GAAATTATCCTTGGTGTGT----- mirL 19 1
-----GAGAAATTATCCTTGGTGTGT----- mirL 21 1
-----AGAAATTATCCTTGGTGTGT----- mirL 20 1
-----CATAACAAGGATAAATTTCTTTT----- mirR 22 11
-----CATAACAAGGATAAATTTCTTTT----- mirR 21 7
-----ATACAAGGATAAATTTCTTTT----- mirR 21 3
-----CATAACAAGGATAAATTTCT----- mirR 18 2
-----CATAACAAGGATAAATTTCTT----- mirR 20 2
-----CATAACAAGGATAAATTTCTT----- mirR 19 2
-----ATACAAGGATAAATTTCTTT----- mirR 20 1
-----ATACAAGGATAAATTTCTTTTGA----- mirR 23 1
-----ATACAAGGATAAATTTCTTT----- mirR 19 1

```

>mmu-mir-199a-2

```

ATCCTGCTCCGTCGCCCCAGTGTTCCAGACTACCTGTTCCAGGACAATGCCGTTGTACAGTAGTCTGCACATTGGTTAGACT species len reads
ATCCTGCTCCGTCGCCCC----- morL 18 4
-----CCCAGTGTTCCAGACTACCTGTT----- mirL 23 2064
-----CCCAGTGTTCCAGACTACCTGT----- mirL 21 1009
-----CCCAGTGTTCCAGACTACC----- mirL 18 478
-----CCCAGTGTTCCAGACTACCTGTT----- mirL 22 182
-----CCCAGTGTTCCAGACTACCT----- mirL 19 157
-----CCAGTGTTCCAGACTACCTGTT----- mirL 22 2
-----CCAGTGTTCCAGACTACCTGTT----- mirL 21 1
-----CAGTGTTCCAGACTACCTGTT----- mirL 21 1
-----ACAGTAGTCTGCACATTGGTTAGAC----- mirR 25 9
-----ACAGTAGTCTGCACATTGGTTAGA----- mirR 24 3
-----CAGTAGTCTGCACATTGGTTAGAC----- mirR 24 3
-----CAGTAGTCTGCACATTGGTTAGA----- mirR 23 1
-----ACAGTAGTCTGCACATTGGTTAGACT----- mirR 26 1
-----TACAGTAGTCTGCACATTGGTTAGACT----- mirR 27 1

```

>mmu-mir-199a-1

```

AGCCATCCCCGCCATCCCAGTGTTCCAGACTACCTGTTCCAGGAGGCTGGGACATGTACAGTAGTCTGCACATTGGTTAGGCTGGGCTGGGCCAGCAGCAACAGTGGGAACCTCCAGACCACCTAAGGT species len
AGCCATCCCCGCCATCCC----- morL 18 1
-----CCCAGTGTTCCAGACTACCTGTT----- mirL 23 2064
-----CCCAGTGTTCCAGACTACCTGT----- mirL 21 1009
-----CCCAGTGTTCCAGACTACC----- mirL 18 478
-----CCCAGTGTTCCAGACTACCTGTT----- mirL 22 182
-----CCCAGTGTTCCAGACTACCT----- mirL 19 157
-----TCCCAGTGTTCCAGACTACC----- mirL 19 2
-----CCAGTGTTCCAGACTACCTGTT----- mirL 22 2
-----CAGTGTTCCAGACTACCTGTT----- mirL 21 1
-----TCCCAGTGTTCCAGACTAC----- mirL 18 1
-----ATCCCAGTGTTCCAGACTACCTGTT----- mirL 25 1

```

```

-----CCAGTGTTCCAGACTACCTGTT-----
-----CAGCAGCAACAGTGGGAAC----- mirL 21 1
-----CAGCAGCAACAGTGGGAACT----- mirR 19 6
-----AGCAGCAACAGTGGGAAC----- mirR 20 3
-----GGCCAGCAGCAACAGTGGG----- mirR 18 2
-----CAGCAACAGTGGGAACTT----- mirR 19 1
-----CAGCAACAGTGGGAACTT----- mirR 18 1
-----CAGCAGCAACAGTGGGAA----- mirR 18 1
-----CAGCAACAGTGGGAACTTCC----- mirR 20 1
-----AACTTCCAGACCACCTAAGGT morR 21 1

```

>mmu-mir-490

| Sequence                                                                        | species | len | reads |
|---------------------------------------------------------------------------------|---------|-----|-------|
| ACCATGGATCTCCAGGTGGGTCACGTTTAGATATACACCAACCTGGAGGACTCCATGCTGTTGAGCTGTTTACAAGCAG | mirL 20 | 381 |       |
| -CCATGGATCTCCAGGTGGGT-----                                                      | mirL 19 | 279 |       |
| -CCATGGATCTCCAGGTGGG-----                                                       | mirL 22 | 134 |       |
| -CCATGGATCTCCAGGTGGGTC-----                                                     | mirL 18 | 82  |       |
| -CCATGGATCTCCAGGTGGGTC-----                                                     | mirL 21 | 77  |       |
| ---TGGATCTCCAGGTGGGTC-----                                                      | mirL 19 | 2   |       |
| ACCATGGATCTCCAGGTGGG-----                                                       | mirL 20 | 1   |       |
| ACCATGGATCTCCAGGTGGGT-----                                                      | mirL 21 | 1   |       |
| -----TCACGTTTAGATATACACC-----                                                   | loop    | 19  | 1     |
| -----CACGTTTAGATATACACC-----                                                    | loop    | 18  | 1     |
| -----CACGTTTAGATATACACCA-----                                                   | loop    | 19  | 1     |
| -----CAACCTGGAGGACTCCATGCTG-----                                                | mirR 22 | 922 |       |
| -----CAACCTGGAGGACTCCATGC-----                                                  | mirR 20 | 783 |       |
| -----CAACCTGGAGGACTCCATGCTGT-----                                               | mirR 23 | 674 |       |
| -----CAACCTGGAGGACTCCATGCT-----                                                 | mirR 21 | 147 |       |
| -----CAACCTGGAGGACTCCATGCTGTT-----                                              | mirR 24 | 102 |       |
| -----CAACCTGGAGGACTCCATG-----                                                   | mirR 19 | 64  |       |
| -----CAACCTGGAGGACTCCAT-----                                                    | mirR 18 | 42  |       |
| -----CCAACCTGGAGGACTCCATGCT-----                                                | mirR 22 | 36  |       |
| -----CCAACCTGGAGGACTCCATGC-----                                                 | mirR 21 | 17  |       |
| -----CCAACCTGGAGGACTCCATGCTGT-----                                              | mirR 24 | 13  |       |
| -----CCAACCTGGAGGACTCCATGCTG-----                                               | mirR 23 | 11  |       |
| -----ACCAACCTGGAGGACTCCATGCTG-----                                              | mirR 24 | 4   |       |
| -----CCAACCTGGAGGACTCCATG-----                                                  | mirR 20 | 3   |       |
| -----ACCAACCTGGAGGACTCC-----                                                    | mirR 18 | 2   |       |
| -----AACCTGGAGGACTCCATGCTGT-----                                                | mirR 22 | 2   |       |
| -----CCAACCTGGAGGACTCCA-----                                                    | mirR 18 | 2   |       |
| -----ACCAACCTGGAGGACTCCATGC-----                                                | mirR 22 | 1   |       |
| -----ACCTGGAGGACTCCATGCTG-----                                                  | mirR 20 | 1   |       |
| -----CACCAACCTGGAGGACTCCATGC-----                                               | mirR 23 | 1   |       |
| -----CCAACCTGGAGGACTCCATGCTGTT-----                                             | mirR 25 | 1   |       |
| -----AACCTGGAGGACTCCATGCTG-----                                                 | mirR 21 | 1   |       |
| -----TTGAGCTGTTTACAAGCAG-----                                                   | morR 19 | 1   |       |
| -----TTGAGCTGTTTACAAGCA-----                                                    | morR 18 | 1   |       |

```

>mmu-mir-874
GCGGCCCCACGCACCAGGGTAAGAGAGACTCACTTCCTGCCCTGGCCCCGAGGGACCGACTG species len reads
-CGGCCCCACGCACCAGGGTAA----- mirL 21 246
-CGGCCCCACGCACCAGGGTAAG----- mirL 22 201
-CGGCCCCACGCACCAGGGTAAGA----- mirL 23 173
-CGGCCCCACGCACCAGGGTA----- mirL 20 65
-CGGCCCCACGCACCAGGGT----- mirL 19 27
--GGCCCCACGCACCAGGGTAA----- mirL 20 12
---GCCCCACGCACCAGGGTAAG----- mirL 20 12
---GCCCCACGCACCAGGGTAAGA----- mirL 21 11
GCGGCCCCACGCACCAGGGTAA----- mirL 22 7
---GCCCCACGCACCAGGGTAA----- mirL 19 7
--GGCCCCACGCACCAGGGTAAGA----- mirL 22 3
GCGGCCCCACGCACCAGG----- mirL 18 3
GCGGCCCCACGCACCAGGGTAAGA----- mirL 24 2
---GCCCCACGCACCAGGGTAAGAG----- mirL 22 2
--GGCCCCACGCACCAGGGTAAG----- mirL 21 2
---GCCCCACGCACCAGGGTA----- mirL 18 2
GCGGCCCCACGCACCAGGGTAAG----- mirL 23 2
--GGCCCCACGCACCAGGGTA----- mirL 19 1
GCGGCCCCACGCACCAGGGT----- mirL 20 1
-----TAAGAGAGACTCACTTCC----- loop 18 1
-----CTGCCCTGGCCCCGAGGGACCGAC-- mirR 23 1408
-----CTGCCCTGGCCCCGAGGGACCGA--- mirR 22 495
-----CTGCCCTGGCCCCGAGGGAC----- mirR 19 220
-----CTGCCCTGGCCCCGAGGGACC----- mirR 20 171
-----CTGCCCTGGCCCCGAGGGACCGACT- mirR 24 89
-----TGCCCTGGCCCCGAGGGACCGA--- mirR 21 61
-----CTGCCCTGGCCCCGAGGGACCGACTG mirR 25 29
-----CTGCCCTGGCCCCGAGGGACCG--- mirR 21 29
-----TGCCCTGGCCCCGAGGGACCGAC-- mirR 22 23
-----TGCCCTGGCCCCGAGGGACC----- mirR 19 6
-----TGCCCTGGCCCCGAGGGACCG--- mirR 20 4
-----TGCCCTGGCCCCGAGGGACCGACT- mirR 23 4
-----GCCCTGGCCCCGAGGGACCGA--- mirR 20 4
-----TGCCCTGGCCCCGAGGGACCGACTG mirR 24 4
-----TGCCCTGGCCCCGAGGGAC----- mirR 18 3
-----GCCCTGGCCCCGAGGGACCGAC-- mirR 21 2
-----TCCTGCCCTGGCCCCGAGGGACCGA--- mirR 24 1

>mmu-mir-423
GAGGAAATAAAGGAAGTTAGGCTGAGGGGCAGAGAGCGAGACTTTTCTATTTTCCAAAAGCTCGGTCTGAGGCCCTCAGTCTTGCTTCTACCCGCGCTT species len reads
GAGGAAATAAAGGAAGTTA----- morL 19 1
-----TGAGGGGCAGAGAGCGAGAC----- mirL 20 95
-----TGAGGGGCAGAGAGCGAGACTTT----- mirL 23 93

```



```

-----TGAGGGGCAGAGAGCGAGACTT----- mirL 22 61
-----TGAGGGGCAGAGAGCGAGACTTTT----- mirL 24 58
-----TGAGGGGCAGAGAGCGAGACTTTTC----- mirL 25 53
-----GAGGGGCAGAGAGCGAGACTTT----- mirL 22 8
-----GAGGGGCAGAGAGCGAGACTT----- mirL 21 8
-----GAGGGGCAGAGAGCGAGACTTTTC----- mirL 24 7
-----GAGGGGCAGAGAGCGAGACTTTT----- mirL 23 2
-----CTGAGGGGCAGAGAGCGAGAC----- mirL 21 2
-----CTGAGGGGCAGAGAGCGA----- mirL 18 1
-----AGGGGCAGAGAGCGAGACT----- mirL 19 1
-----AGGGGCAGAGAGCGAGACTTTTC----- mirL 23 1
-----AGGGGCAGAGAGCGAGACTTTT----- mirL 22 1
-----GAGGGGCAGAGAGCGAGAC----- mirL 19 1
-----ACTTTTCTATTTTCCAAAAG----- loop 20 1
-----AGCTCGGTCTGAGGCCCTCAGTC----- mirR 24 577
-----AGCTCGGTCTGAGGCCCTC----- mirR 20 387
-----AGCTCGGTCTGAGGCCCTCAGT----- mirR 23 379
-----AGCTCGGTCTGAGGCCCTCA----- mirR 21 288
-----AGCTCGGTCTGAGGCCCT----- mirR 19 283
-----AGCTCGGTCTGAGGCCCT----- mirR 18 211
-----AGCTCGGTCTGAGGCCCTCAG----- mirR 22 206
-----AAGCTCGGTCTGAGGCCCTCA----- mirR 22 100
-----AAGCTCGGTCTGAGGCCCTC----- mirR 21 69
-----AAGCTCGGTCTGAGGCCCT----- mirR 19 53
-----AAGCTCGGTCTGAGGCCCT----- mirR 20 34
-----AAGCTCGGTCTGAGGCCCTCAGTC----- mirR 25 34
-----AAGCTCGGTCTGAGGCCCTCAG----- mirR 23 32
-----AAGCTCGGTCTGAGGCCCTCAGT----- mirR 24 22
-----GCTCGGTCTGAGGCCCTCAGTC----- mirR 23 7
-----AAAGCTCGGTCTGAGGCCCTC----- mirR 22 6
-----TCGGTCTGAGGCCCTCAGT----- mirR 20 3
-----CTCGGTCTGAGGCCCTCAGTC----- mirR 22 2
-----GCTCGGTCTGAGGCCCTCAGT----- mirR 22 1
-----GCTCGGTCTGAGGCCCT----- mirR 18 1
-----AAAGCTCGGTCTGAGGCCCTCA----- mirR 23 1
-----GCTCGGTCTGAGGCCCTC----- mirR 19 1
-----TGCTTCCTACCCCGCGCTT morR 19 1

```

>mmu-mir-152

```

GCCGCTGTTCCCGGGCCTAGGTTCTGTGATACTCCGACTCGGGCTCTGGAGCAGTCAGTGCATGACAGAACTTGGGCC species len reads
GCCGCTGTTCCCGGGCC----- morL 18 1
-----TAGGTTCTGTGATACTCCGAC----- mirL 23 33
-----TAGGTTCTGTGATACTCC----- mirL 20 11
-----TAGGTTCTGTGATACTCCGACT----- mirL 24 10
-----TAGGTTCTGTGATACTC----- mirL 19 8
-----TAGGTTCTGTGATACTCCGA----- mirL 22 7

```

```
-----AGGTTCTGTGATACTCCGAC----- mirL 22 4
-----AGGTTCTGTGATACTCCGACT----- mirL 23 4
-----AGGTTCTGTGATACTCCGACTC----- mirL 24 3
-----AGGTTCTGTGATACTCC----- mirL 19 2
-----AGGTTCTGTGATACTCCGA----- mirL 21 2
-----TCAGTGCATGACAGAACTTGG---- mirR 21 1253
-----TCAGTGCATGACAGAACTTGGG--- mirR 22 944
-----TCAGTGCATGACAGAACTTGGGC-- mirR 23 311
-----TCAGTGCATGACAGAACTT----- mirR 19 110
-----TCAGTGCATGACAGAACTTG---- mirR 20 82
-----CAGTGCATGACAGAACTTGG--- mirR 20 80
-----TCAGTGCATGACAGAACTTGGGCC- mirR 24 69
-----CAGTGCATGACAGAACTTGGG--- mirR 21 63
-----TCAGTGCATGACAGAACT----- mirR 18 48
-----CAGTGCATGACAGAACTT----- mirR 18 9
-----CAGTGCATGACAGAACTTGGGC-- mirR 22 8
-----CAGTGCATGACAGAACTTG---- mirR 19 6
-----GTCAGTGCATGACAGAACTTGG--- mirR 22 4
-----CAGTGCATGACAGAACTTGGGCCC mirR 24 3
-----CAGTGCATGACAGAACTTGGGCC- mirR 23 2
-----GTGCATGACAGAACTTGG--- mirR 18 1
-----GTGCATGACAGAACTTGGG--- mirR 19 1
-----GTCAGTGCATGACAGAACTTG---- mirR 21 1
```

>mmu-mir-3085

```
CCCAACTCTGGGAAGGTGCCATTCCGAGGGCCAAGAGTCTGAATATGAGTCACTCTGGCTGCTATGGCCCCCTCCCAGG species len reads
CCCAACTCTGGGAAGGTG----- mirL 18 24
-----TCTGGCTGCTATGGCCCCCTCC--- mirR 22 1316
-----TCTGGCTGCTATGGCCCCCTC---- mirR 21 516
-----TCTGGCTGCTATGGCCCCCTCCC--- mirR 23 327
-----CTGGCTGCTATGGCCCCCTCC--- mirR 21 226
-----TCTGGCTGCTATGGCCCCCT----- mirR 20 220
-----TCTGGCTGCTATGGCCCCC----- mirR 19 198
-----TCTGGCTGCTATGGCCCC----- mirR 18 76
-----CTGGCTGCTATGGCCCCCTCC--- mirR 22 55
-----CTGGCTGCTATGGCCCCCTC---- mirR 20 48
-----TCTGGCTGCTATGGCCCCCTCCCA-- mirR 24 35
-----CTGGCTGCTATGGCCCCCT----- mirR 19 16
-----CTGGCTGCTATGGCCCCC----- mirR 18 11
-----CTGGCTGCTATGGCCCCCTCCCA-- mirR 23 1
-----CTGGCTGCTATGGCCCCCTCCCAGG mirR 25 1
-----CTCTGGCTGCTATGGCCCCCTCC--- mirR 23 1
-----CTCTGGCTGCTATGGCCC----- mirR 18 1
```

>mmu-mir-671

```
ACTGGCAGGCCAGGAAGAGGAGGAAGCCCTGGAGGGGCTGGAGGTGATGGATGTTTCTCCGGTTCTCAGGGCTCCACCTCT species len reads
```

```

ACTGGCAGGCCAGGAAGAGG----- morL 20 1
-----AGGAAGCCCTGGAGGGGCTGGAG----- mirL 23 545
-----AGGAAGCCCTGGAGGGGCTGGAGGT----- mirL 25 476
-----AGGAAGCCCTGGAGGGGCTGGAGG----- mirL 24 309
-----AGGAAGCCCTGGAGGGGCTGGA----- mirL 22 286
-----AGGAAGCCCTGGAGGGGCTGG----- mirL 21 246
-----AGGTGATGGATGTTTTCC----- loop 18 1
-----TCCGGTTCTCAGGGCTCCACCTC----- mirR 23 334
-----TCCGGTTCTCAGGGCTCCACC----- mirR 21 295
-----TCCGGTTCTCAGGGCTCCACCT----- mirR 22 246
-----TCCGGTTCTCAGGGCTCCAC----- mirR 20 141
-----TCCGGTTCTCAGGGCTCCA----- mirR 19 79
-----TCCGGTTCTCAGGGCTCC----- mirR 18 52
-----CCGGTTCTCAGGGCTCCACCT----- mirR 21 15
-----CCGGTTCTCAGGGCTCCACC----- mirR 20 9
-----TCCGGTTCTCAGGGCTCCACCTCT----- mirR 24 6
-----CTCCGGTTCTCAGGGCTCCACC----- mirR 22 5
-----CCGGTTCTCAGGGCTCCAC----- mirR 19 4
-----CTCCGGTTCTCAGGGCTC----- mirR 18 2
-----CCGGTTCTCAGGGCTCCACCTC----- mirR 22 2
-----GGTTCTCAGGGCTCCACC----- mirR 18 1
-----CCTCCGGTTCTCAGGGCTCCA----- mirR 21 1
-----TCCTCCGGTTCTCAGGGCTCCACC----- mirR 24 1
-----CTCCGGTTCTCAGGGCTCCAC----- mirR 21 1
-----CCGGTTCTCAGGGCTCCA----- mirR 18 1
-----CTCCGGTTCTCAGGGCTCCACCTC----- mirR 24 1

```

>mmu-mir-96

| Species                                                                                                | len | reads |
|--------------------------------------------------------------------------------------------------------|-----|-------|
| CCAGTACCATCTGCTTGGCCGATTTTGGCACTAGCACATTTTGTCTGTGTCTCTCCGCTGTGAGCAATCATGTGTAGTGCCAATATGGGAAAAGCGGGCTGC | 21  | 1     |
| CCAGTACCATCTGCTTGGCCG-----                                                                             | 21  | 1     |
| --AGTACCATCTGCTTGGCC-----                                                                              | 18  | 1     |
| --AGTACCATCTGCTTGGCCGATT-----                                                                          | 22  | 1     |
| -----TTTGGCACTAGCACATTTTGC-----                                                                        | 22  | 1057  |
| -----TTTGGCACTAGCACATTTTGT-----                                                                        | 21  | 626   |
| -----TTTGGCACTAGCACATTTT-----                                                                          | 19  | 480   |
| -----TTTGGCACTAGCACATTTT-----                                                                          | 20  | 351   |
| -----TTTGGCACTAGCACATTT-----                                                                           | 18  | 226   |
| -----TTGGCACTAGCACATTTTGC-----                                                                         | 21  | 35    |
| -----TTGGCACTAGCACATTTTGT-----                                                                         | 20  | 26    |
| -----TTGGCACTAGCACATTTTGTCT-----                                                                       | 22  | 19    |
| -----TTGGCACTAGCACATTTT-----                                                                           | 19  | 12    |
| -----TTGGCACTAGCACATTTT-----                                                                           | 18  | 12    |
| -----TGGCACTAGCACATTTTGC-----                                                                          | 20  | 1     |
| -----GCTTGTGTCTCTCCGCTGTGA-----                                                                        | 21  | 1     |
| -----CAATCATGTGTAGTGCCAATAT-----                                                                       | 22  | 99    |
| -----AATCATGTGTAGTGCCAATAT-----                                                                        | 21  | 32    |

```

-----CAATCATGTGTAGTGCCAAT----- mirR 20 17
-----CAATCATGTGTAGTGCCAATA----- mirR 21 9
-----AATCATGTGTAGTGCCAAT----- mirR 19 7
-----AATCATGTGTAGTGCCAATA----- mirR 20 6
-----CAATCATGTGTAGTGCCAA----- mirR 19 4
-----CAATCATGTGTAGTGCCA----- mirR 18 4
-----AATCATGTGTAGTGCCAA----- mirR 18 2
-----CAATCATGTGTAGTGCCAATATG----- mirR 23 2
-----ATCATGTGTAGTGCCAAT----- mirR 18 1
-----TCATGTGTAGTGCCAATATGGG----- mirR 22 1
-----ATCATGTGTAGTGCCAATAT----- mirR 20 1
-----TATGGGAAAAGCGGGCTGC morR 19 3
-----TATGGGAAAAGCGGGCTG- morR 18 1

```

>mmu-mir-19a

```

TAGTTTTGCATAGTTGCACTACAAGAAGAATGTAGTTGTGCAAATCTATGCAAAACTGATGGTGGCCTGCTATT species len reads
TAGTTTTGCATAGTTGCACTAC----- mirL 22 4
-AGTTTTGCATAGTTGCACTA----- mirL 20 3
-AGTTTTGCATAGTTGCACT----- mirL 19 1
-AGTTTTGCATAGTTGCACTAC----- mirL 21 1
TAGTTTTGCATAGTTGCACTA----- mirL 21 1
TAGTTTTGCATAGTTGCACTACAA----- mirL 24 1
-----TGTGCAAATCTATGCAAAACTGA----- mirR 23 1493
-----TGTGCAAATCTATGCAAAACTG----- mirR 22 622
-----TGTGCAAATCTATGCAAAACT----- mirR 21 268
-----TGTGCAAATCTATGCAAAAC----- mirR 20 244
-----TGTGCAAATCTATGCAAAA----- mirR 19 127
-----GTGCAAATCTATGCAAAACTGA----- mirR 22 80
-----TGTGCAAATCTATGCAAAA----- mirR 18 33
-----TGTGCAAATCTATGCAAAACTGAT----- mirR 24 28
-----GTGCAAATCTATGCAAAACTG----- mirR 21 26
-----TTGTGCAAATCTATGCAAAACTG----- mirR 23 15
-----TTGTGCAAATCTATGCAAAACT----- mirR 22 13
-----GTGCAAATCTATGCAAAACT----- mirR 20 12
-----GTGCAAATCTATGCAAAAC----- mirR 19 10
-----TTGTGCAAATCTATGCAAAAC----- mirR 21 8
-----TTGTGCAAATCTATGCAAAA----- mirR 20 6
-----GTGCAAATCTATGCAAAA----- mirR 18 4
-----TTGTGCAAATCTATGCAAAACTGA----- mirR 24 4
-----GTGCAAATCTATGCAAAACTGAT----- mirR 23 3
-----TTGTGCAAATCTATGCAAAA----- mirR 19 1
-----TTGTGCAAATCTATGCAAAACTGAT----- mirR 25 1
-----TGATGGTGGCCTGCTATT morR 18 1

```

>mmu-mir-344b

```

TCTCTGCAGCCAGGATTTTCATCAGTCAGGCTCCTGGCTAAAGTTCAGCTTTCAGCTGCATTTAGCCAAAGCCTGACTGTAAGCTGCTCCAGACAAGG species len reads

```

```

TCTCTGCAGCCAGGATTTTC----- morL 20 1
-----GCCAGGATTTTCATCAGT----- morL 18 1
-----AGTCAGGCTCCTGGCTAAAGTTC----- mirL 23 2
-----CATTAGCCAAAGCCTGACTGT----- mirR 22 2167
-----CATTAGCCAAAGCCTGAC----- mirR 19 271
-----CATTAGCCAAAGCCTGACT----- mirR 20 102
-----CATTAGCCAAAGCCTGACTG----- mirR 21 76
-----CATTAGCCAAAGCCTGACTGTA----- mirR 23 63
-----CATTAGCCAAAGCCTGA----- mirR 18 36
-----CATTAGCCAAAGCCTGACTGTAAG----- mirR 25 29
-----GCATTTAGCCAAAGCCTGACTGT----- mirR 23 11
-----ATTTAGCCAAAGCCTGACTGT----- mirR 21 8
-----TTAGCCAAAGCCTGACTGT----- mirR 19 5
-----GCATTTAGCCAAAGCCTGACTG----- mirR 22 3
-----ATTTAGCCAAAGCCTGAC----- mirR 18 2
-----TGCATTTAGCCAAAGCCTGACT----- mirR 22 1
-----GCATTTAGCCAAAGCCTGAC----- mirR 20 1
-----TGCATTTAGCCAAAGCCTGA----- mirR 20 1
-----AAGCTGCTCCAGACAAGG morR 18 1

```

>mmu-mir-193

```

TGGGTCTTTGCGGGCAAGATGAGAGTGTCAGTTCAACTGGCCTACAAAGTCCCAGTCC species len reads
TGGGTCTTTGCGGGCAAGATGA----- mirL 22 31
-GGGTCTTTGCGGGCAAGATGA----- mirL 21 7
TGGGTCTTTGCGGGCAAGATG----- mirL 21 6
TGGGTCTTTGCGGGCAAG----- mirL 18 4
TGGGTCTTTGCGGGCAAGA----- mirL 19 3
TGGGTCTTTGCGGGCAAGAT----- mirL 20 2
-GGGTCTTTGCGGGCAAGATGAGA----- mirL 23 1
--GGTCTTTGCGGGCAAGAT----- mirL 18 1
-----AACTGGCCTACAAAGTCCCA----- mirR 20 672
-----AACTGGCCTACAAAGTCCCAGTC----- mirR 23 628
-----AACTGGCCTACAAAGTCCC----- mirR 19 466
-----AACTGGCCTACAAAGTCCCAG----- mirR 21 358
-----AACTGGCCTACAAAGTCCCAGT----- mirR 22 301
-----AACTGGCCTACAAAGTCC----- mirR 18 141
-----AACTGGCCTACAAAGTCCCAGTCC----- mirR 24 41
-----ACTGGCCTACAAAGTCCCAGT----- mirR 21 2
-----TGGCCTACAAAGTCCCAGT----- mirR 19 2
-----CAACTGGCCTACAAAGTCC----- mirR 19 2
-----ACTGGCCTACAAAGTCCCAGTCC----- mirR 23 2
-----ACTGGCCTACAAAGTCCCA----- mirR 19 1
-----TCAACTGGCCTACAAAGTCC----- mirR 20 1
-----ACTGGCCTACAAAGTCCCAGTC----- mirR 22 1
-----TGGCCTACAAAGTCCCAGTCC----- mirR 21 1

```

>mmu-mir-142

| Sequence                    | species | len | reads |
|-----------------------------|---------|-----|-------|
| GGACAGACAGACAGTGCAGTCA      | morL    | 21  | 1     |
| ---CAGACAGACAGTGCAGTCA      | morL    | 20  | 1     |
| -----GACAGACAGTGCAGTCA      | morL    | 19  | 1     |
| GGACAGACAGACAGTGCAG         | morL    | 19  | 1     |
| ----AGACAGACAGTGCAGTCA      | morL    | 19  | 1     |
| -GACAGACAGACAGTGCAGT        | morL    | 19  | 1     |
| ----GACAGACAGTGCAGTCA       | morL    | 18  | 1     |
| -----CCATAAAAGTAGAAAGCA     | mirL    | 22  | 671   |
| -----CCATAAAAGTAGAAAGCA     | mirL    | 20  | 449   |
| -----CCATAAAAGTAGAAAGCA     | mirL    | 21  | 215   |
| -----CCATAAAAGTAGAAAGCA     | mirL    | 19  | 184   |
| -----ACCCATAAAAGTAGAAAGCA   | mirL    | 23  | 126   |
| -----CATAAAAGTAGAAAGCA      | mirL    | 20  | 61    |
| -----CATAAAAGTAGAAAGCA      | mirL    | 22  | 51    |
| -----CATAAAAGTAGAAAGCA      | mirL    | 21  | 37    |
| -----CATAAAAGTAGAAAGCA      | mirL    | 19  | 28    |
| -----CATAAAAGTAGAAAGCA      | mirL    | 18  | 19    |
| -----ACCCATAAAAGTAGAAAGCA   | mirL    | 22  | 19    |
| -----CCATAAAAGTAGAAAGCA     | mirL    | 18  | 16    |
| -----ACCCATAAAAGTAGAAAGCA   | mirL    | 20  | 12    |
| -----ATAAAAGTAGAAAGCA       | mirL    | 18  | 5     |
| -----ACCCATAAAAGTAGAAAGCA   | mirL    | 21  | 2     |
| -----ATAAAAGTAGAAAGCA       | mirL    | 23  | 1     |
| -----CCATAAAAGTAGAAAGCA     | mirL    | 20  | 1     |
| -----ACCCATAAAAGTAGAAAGCA   | mirL    | 18  | 1     |
| -----ATAAAAGTAGAAAGCA       | mirL    | 19  | 1     |
| -----ACTAACAGCACTGGAGGG     | loop    | 18  | 3     |
| -----TGTAGTGTTCCTACTTTATGG  | mirR    | 22  | 216   |
| -----TGTAGTGTTCCTACTTTATG   | mirR    | 21  | 67    |
| -----AGTGTTCCTACTTTATGGATGA | mirR    | 23  | 65    |
| -----GTAGTGTTCCTACTTTATGG   | mirR    | 21  | 57    |
| -----TGTAGTGTTCCTACTTTATGGA | mirR    | 23  | 55    |
| -----TGTAGTGTTCCTACTTTAT    | mirR    | 20  | 35    |
| -----AGTGTTCCTACTTTATGGATG  | mirR    | 22  | 32    |
| -----GTAGTGTTCCTACTTTATGGA  | mirR    | 22  | 29    |
| -----TGTAGTGTTCCTACTTTA     | mirR    | 19  | 26    |
| -----AGTGTTCCTACTTTATGGAT   | mirR    | 21  | 21    |
| -----TGTAGTGTTCCTACTTT      | mirR    | 18  | 19    |
| -----AGTGTTCCTACTTTATGG     | mirR    | 19  | 15    |
| -----GTAGTGTTCCTACTTTATG    | mirR    | 20  | 15    |
| -----GTAGTGTTCCTACTTTAT     | mirR    | 19  | 14    |
| -----GTAGTGTTCCTACTTTATGGAT | mirR    | 23  | 13    |
| -----AGTGTTCCTACTTTATGGA    | mirR    | 20  | 9     |
| -----GTAGTGTTCCTACTTTA      | mirR    | 18  | 8     |
| -----TAGTGTTCCTACTTTATGGAT  | mirR    | 22  | 6     |

```

-----AGTGTTCCTACTTTATGGATGAG----- mirR 24 5
-----TAGTGTTCCTACTTTATGG----- mirR 20 5
-----TGTAGTGTTCCTACTTTATGGAT----- mirR 24 4
-----AGTGTTCCTACTTTATG----- mirR 18 3
-----TAGTGTTCCTACTTTATGGATG----- mirR 23 2
-----TAGTGTTCCTACTTTATGGA----- mirR 21 2
-----GTAGTGTTCCTACTTTATGGATGA----- mirR 25 2
-----TAGTGTTCCTACTTTAT----- mirR 18 2
-----GTGTAGTGTTCCTACTT----- mirR 18 1
-----TAGTGTTCCTACTTTATGGATGAGT----- mirR 26 1
-----TGAGTGCCTGTGGGCTTC--- morR 19 2
-----TGAGTGCCTGTGGGCTTCG-- morR 20 2
-----GGATGAGTGCCTGTGGG--- morR 18 1
-----TGAGTGCCTGTGGGCTTCGGA morR 22 1
-----TGAGTGCCTGTGGGCTT--- morR 18 1

```

>mmu-mir-592

| sequence                                                        | species | len | reads |
|-----------------------------------------------------------------|---------|-----|-------|
| CATTGTGTCAATATGCGATGATGTGTGTGATGGCACAGCGTCATCACGTGGTGACGCAACATC | mirL    | 22  | 1348  |
| --TTGTGTCAATATGCGATGATGT-----                                   | mirL    | 23  | 276   |
| --TGTGTCAATATGCGATGATGT-----                                    | mirL    | 21  | 164   |
| --TTGTGTCAATATGCGATGAT-----                                     | mirL    | 20  | 84    |
| --TTGTGTCAATATGCGATGATG-----                                    | mirL    | 21  | 82    |
| ---TGTGTCAATATGCGATGATGT-----                                   | mirL    | 22  | 68    |
| ---TTGTGTCAATATGCGATGA-----                                     | mirL    | 19  | 50    |
| -ATTGTGTCAATATGCGATGATGT-----                                   | mirL    | 23  | 20    |
| ---TGTGTCAATATGCGATGATG-----                                    | mirL    | 20  | 13    |
| ---TGTGTCAATATGCGATGATGTGTG-----                                | mirL    | 25  | 9     |
| ---TGTGTCAATATGCGATGAT-----                                     | mirL    | 19  | 8     |
| -ATTGTGTCAATATGCGATGA-----                                      | mirL    | 20  | 6     |
| -ATTGTGTCAATATGCGATGATG-----                                    | mirL    | 22  | 5     |
| -ATTGTGTCAATATGCGATGATGTG-----                                  | mirL    | 24  | 3     |
| -ATTGTGTCAATATGCGATGAT-----                                     | mirL    | 21  | 3     |
| CATTGTGTCAATATGCGATGAT-----                                     | mirL    | 22  | 2     |
| CATTGTGTCAATATGCGATGA-----                                      | mirL    | 21  | 1     |
| CATTGTGTCAATATGCGATG-----                                       | mirL    | 20  | 1     |
| CATTGTGTCAATATGCGATGATGTG-----                                  | mirL    | 25  | 1     |
| ----GTGTCAATATGCGATGATGT-----                                   | mirL    | 20  | 1     |
| -----TTGTGATGGCACAGCGTC-----                                    | loop    | 18  | 2     |
| -----TCATCACGTGGTGACGCAACATC-----                               | mirR    | 23  | 176   |
| -----TCATCACGTGGTGACGCAACAT-----                                | mirR    | 22  | 102   |
| -----TCATCACGTGGTGACGCAACA-----                                 | mirR    | 21  | 59    |
| -----TCATCACGTGGTGACGCAAC-----                                  | mirR    | 20  | 32    |
| -----CATCACGTGGTGACGCAACAT-----                                 | mirR    | 21  | 19    |
| -----TCATCACGTGGTGACGCAA-----                                   | mirR    | 19  | 9     |
| -----CATCACGTGGTGACGCAACA-----                                  | mirR    | 20  | 5     |

```

-----TCATCACGTGGTGACGCA----- mirR 18 5
-----CATCACGTGGTGACGCAACATC mirR 22 4
-----CATCACGTGGTGACGCAA----- mirR 18 2
-----GTCATCACGTGGTGACGCAACA-- mirR 22 1
-----CATCACGTGGTGACGCAAC-- mirR 19 1

```

>mmu-mir-455

```

TCCCTGGTGTGAGCGTATGTGCCTTTGGACTACATCGTGAACGCAGCACCATGCAGTCCACGGGCATATACACTTGCCTCAAGGTCTATGTC species len reads
TCCCTGGTGTGAGCGTAT----- morL 18 13
-----TATGTGCCTTTGGACTACATC----- mirL 21 106
-----TATGTGCCTTTGGACTACATCG----- mirL 22 88
-----TATGTGCCTTTGGACTACATCGT----- mirL 23 43
-----TATGTGCCTTTGGACTACAT----- mirL 20 20
-----TATGTGCCTTTGGACTAC----- mirL 18 15
-----ATGTGCCTTTGGACTACATCG----- mirL 21 13
-----ATGTGCCTTTGGACTACATCGT----- mirL 22 7
-----GTATGTGCCTTTGGACTACATC----- mirL 22 6
-----GTATGTGCCTTTGGACTACAT----- mirL 21 4
-----GTATGTGCCTTTGGACTAC----- mirL 19 4
-----GTATGTGCCTTTGGACTACA----- mirL 20 3
-----TGTGCCTTTGGACTACATCGTG----- mirL 22 3
-----CGTATGTGCCTTTGGACTAC----- mirL 20 2
-----ATGTGCCTTTGGACTACATC----- mirL 20 1
-----GTATGTGCCTTTGGACTACATCG----- mirL 23 1
-----TGTGCCTTTGGACTACATCGT----- mirL 21 1
-----CGTATGTGCCTTTGGACTACAT----- mirL 22 1
-----CGTATGTGCCTTTGGACTACATC----- mirL 23 1
-----ATCGTGAACGCAGCACCA----- loop 18 6
-----TGAACGCAGCACCATGCA----- loop 18 1
-----GCAGTCCACGGGCATATACAC----- mirR 21 554
-----GCAGTCCACGGGCATATACACT----- mirR 22 499
-----GCAGTCCACGGGCATATAC----- mirR 19 253
-----GCAGTCCACGGGCATATACACTT----- mirR 23 163
-----CAGTCCACGGGCATATACACTT----- mirR 22 114
-----GCAGTCCACGGGCATATACA----- mirR 20 89
-----CAGTCCACGGGCATATACACT----- mirR 21 40
-----CAGTCCACGGGCATATACAC----- mirR 20 38
-----GCAGTCCACGGGCATATA----- mirR 18 33
-----GCAGTCCACGGGCATATACACTTG----- mirR 24 27
-----CAGTCCACGGGCATATACACTTG----- mirR 23 24
-----CATGCAGTCCACGGGCATATAC----- mirR 22 24
-----ATGCAGTCCACGGGCATATACAC----- mirR 23 20
-----TGCAGTCCACGGGCATATACAC----- mirR 22 20
-----CAGTCCACGGGCATATAC----- mirR 18 19
-----ATGCAGTCCACGGGCATATAC----- mirR 21 17
-----CAGTCCACGGGCATATACACTTGCC----- mirR 25 15

```



```

-----TGCAGTCCACGGGCATATAC----- mirR 20 13
-----CATGCAGTCCACGGGCATAT----- mirR 20 13
-----ATGCAGTCCACGGGCATATA----- mirR 20 11
-----ATGCAGTCCACGGGCATAT----- mirR 19 10
-----TGCAGTCCACGGGCATATACA----- mirR 21 8
-----CATGCAGTCCACGGGCATATA----- mirR 21 8
-----TGCAGTCCACGGGCATATACACTT----- mirR 24 5
-----CATGCAGTCCACGGGCATA----- mirR 19 5
-----ATGCAGTCCACGGGCATA----- mirR 18 5
-----TGCAGTCCACGGGCATAT----- mirR 18 5
-----CATGCAGTCCACGGGCATATACA----- mirR 23 4
-----ATGCAGTCCACGGGCATATACA----- mirR 22 4
-----CAGTCCACGGGCATATACACTTGC----- mirR 24 4
-----TGCAGTCCACGGGCATATA----- mirR 19 4
-----CATGCAGTCCACGGGCATATACAC----- mirR 24 3
-----ATGCAGTCCACGGGCATATACACT----- mirR 24 3
-----AGTCCACGGGCATATACACT----- mirR 20 2
-----TGCAGTCCACGGGCATATACACT----- mirR 23 1
-----CATGCAGTCCACGGGCAT----- mirR 18 1
-----TGCCTCAAGGTCTATGTC morR 18 2

```

>mmu-mir-188

```

TCCCTGCTCCCTCTCTCACATCCCTTGCATGGTGGAGGGTGAGCTCTCTGAAAACCCCTCCACATGCAGGGTTTGCAGG species len reads
TCCCTGCTCCCTCTCTCACA----- morL 20 1
-----CATCCCTTGCATGGTGGAGGG----- mirL 21 381
-----CATCCCTTGCATGGTGGAGG----- mirL 20 353
-----CATCCCTTGCATGGTGGAG----- mirL 19 345
-----CATCCCTTGCATGGTGGAGGGT----- mirL 22 343
-----CATCCCTTGCATGGTGGAGGGTG----- mirL 23 239
-----ATCCCTTGCATGGTGGAGGGTGAGC----- mirL 25 1
-----ATCCCTTGCATGGTGGAGGGTG----- mirL 22 1
-----TCCCTTGCATGGTGGAGGG----- mirL 19 1
-----CTCCCACATGCAGGGTTTGC--- mirR 20 446
-----CTCCCACATGCAGGGTTTG--- mirR 19 78
-----CTCCCACATGCAGGGTTTGCA-- mirR 21 74
-----CTCCCACATGCAGGGTTTGCA-- mirR 22 16
-----CTCCCACATGCAGGGTTT----- mirR 18 11
-----CCTCCCACATGCAGGGTTTGC--- mirR 21 10
-----CCTCCCACATGCAGGGTTTG--- mirR 20 6
-----TCCCACATGCAGGGTTTGC--- mirR 19 3
-----CTCCCACATGCAGGGTTTGCAGG mirR 23 3
-----CCTCCCACATGCAGGGTTTGCA-- mirR 22 2
-----TCCCACATGCAGGGTTTG--- mirR 18 1

```

>mmu-mir-351

```

ATTAATCATGGCACCTCCGTTTCCCTGAGGAGCCCTTTGAGCCTGGAGTGAAAAAACAAGGTCAAGAGGCGCCTGGGAAGTGGAGAGAGTGTAA species len reads

```

```

ATTAATCATGGCACCTCCG----- morL 19 3
ATTAATCATGGCACCTCC----- morL 18 1
----ATCATGGCACCTCCGTTT----- morL 18 1
-----TCCCTGAGGAGCCCTTTGAGCC----- mirL 22 779
-----TCCCTGAGGAGCCCTTTGAGCCTGG----- mirL 25 529
-----TCCCTGAGGAGCCCTTTG----- mirL 18 391
-----TCCCTGAGGAGCCCTTTGA----- mirL 19 237
-----TCCCTGAGGAGCCCTTTGAG----- mirL 20 219
-----CCCTGAGGAGCCCTTTGAGCC----- mirL 21 24
-----CCCTGAGGAGCCCTTTGAGCCT----- mirL 22 16
-----CCCTGAGGAGCCCTTTGAGCCTG----- mirL 23 16
-----CCCTGAGGAGCCCTTTGAG----- mirL 19 14
-----CCCTGAGGAGCCCTTTGAGCCTGG----- mirL 24 13
-----TTCCCTGAGGAGCCCTTTGAGCC----- mirL 23 1
-----GCCTGGAGTGAAAAAAAAAAC----- loop 22 1
-----GGTCAAGAGGCGCCTGGGAAC----- mirR 21 6
-----GGTCAAGAGGCGCCTGGGAACT----- mirR 22 5
-----GTCAAGAGGCGCCTGGGAAC----- mirR 20 3
-----GGTCAAGAGGCGCCTGGGAA----- mirR 20 1
-----GGTCAAGAGGCGCCTGGGAACTG----- mirR 23 1
-----AACTGGAGAAGAGTGTTAA morR 19 1

```

>mmu-mir-412

```

TCGCTCTGGGGTATGGGACGGATGGTTCGACCAGCTGGAAAGTAATTGTTCTAATGTACTTCACCTGGTCCACTAGCCGTCG species len reads
-CGCTCTGGGGTATGGGACGG----- morL 20 1
TCGCTCTGGGGTATGGGACGGAT----- morL 23 1
-----TGGTCGACCAGCTGGAAAGTAA----- mirL 22 287
-----TGGTCGACCAGCTGGAAAGT----- mirL 20 190
-----TGGTCGACCAGCTGGAAAGTAAT----- mirL 23 152
-----TGGTCGACCAGCTGGAAAGTA----- mirL 21 91
-----TGGTCGACCAGCTGGAAAG----- mirL 19 52
-----ATGGTCGACCAGCTGGAAAGT----- mirL 21 13
-----GGTCGACCAGCTGGAAAGTAA----- mirL 21 12
-----GGTCGACCAGCTGGAAAGT----- mirL 19 10
-----GGTCGACCAGCTGGAAAGTA----- mirL 20 4
-----GGTCGACCAGCTGGAAAGTAAT----- mirL 22 4
-----GGTCGACCAGCTGGAAAG----- mirL 18 3
-----GATGGTCGACCAGCTGGAAAGT----- mirL 22 3
-----ATGGTCGACCAGCTGGAAAGTA----- mirL 22 3
-----GATGGTCGACCAGCTGGAA----- mirL 19 2
-----GATGGTCGACCAGCTGGAAAGTA----- mirL 23 1
-----ATGGTCGACCAGCTGGAAAGTAA----- mirL 23 1
-----GATGGTCGACCAGCTGGAA----- mirL 18 1
-----GATGGTCGACCAGCTGGAAAG----- mirL 21 1
-----ATGGTCGACCAGCTGGAA----- mirL 18 1
-----CTTCACCTGGTCCACTAGCCGTC----- mirR 23 378

```

```

-----CTTCACCTGGTCCACTAGC----- mirR 19 333
-----CTTCACCTGGTCCACTAGCCGT-- mirR 22 169
-----CTTCACCTGGTCCACTAGCCG--- mirR 21 166
-----CTTCACCTGGTCCACTAGCC---- mirR 20 125
-----TTCACCTGGTCCACTAGCCGT-- mirR 21 27
-----TTCACCTGGTCCACTAGCCGTC- mirR 22 26
-----CTTCACCTGGTCCACTAG----- mirR 18 17
-----CTTCACCTGGTCCACTAGCCGTCG mirR 24 17
-----TACTTCACCTGGTCCACTAGC----- mirR 21 9
-----GTACTTCACCTGGTCCACTA----- mirR 20 9
-----TACTTCACCTGGTCCACTA----- mirR 19 9
-----TACTTCACCTGGTCCACTAG----- mirR 20 8
-----TTCACCTGGTCCACTAGCCGTCG mirR 23 6
-----TTCACCTGGTCCACTAGC----- mirR 18 6
-----GTACTTCACCTGGTCCACT----- mirR 19 5
-----GTACTTCACCTGGTCCACTAGC----- mirR 22 5
-----GTACTTCACCTGGTCCACTAG----- mirR 21 4
-----TACTTCACCTGGTCCACTAGCC---- mirR 22 4
-----TTCACCTGGTCCACTAGCC---- mirR 19 4
-----ACTTCACCTGGTCCACTAGC----- mirR 20 4
-----GTACTTCACCTGGTCCACTAGCC--- mirR 23 3
-----TCACCTGGTCCACTAGCCGT-- mirR 20 2
-----TCACCTGGTCCACTAGCCGTC- mirR 21 2
-----TACTTCACCTGGTCCACTAGCCG--- mirR 23 2
-----GTACTTCACCTGGTCCAC----- mirR 18 1
-----TACTTCACCTGGTCCACTAGCCGTC- mirR 25 1
-----TTCACCTGGTCCACTAGCCG--- mirR 20 1
-----ACTTCACCTGGTCCACTAGCCGTC- mirR 24 1
-----ACTTCACCTGGTCCACTAGCCG--- mirR 22 1
-----TACTTCACCTGGTCCACT----- mirR 18 1
-----TCACCTGGTCCACTAGCC---- mirR 18 1
-----TCACCTGGTCCACTAGCCGTCG mirR 22 1

```

>mmu-mir-690

```

TATTAAAGTGCTAGTAAGAAACATTCTCCTCCAGCTGGAGAGATGGCTCAGCTGTAAAGGCTAGGCTCACAACCAAAATATAAGAA species len reads
TATTAAAGTGCTAGTAAG----- mirL 18 2
-----GCTAGGCTCACAACCAAAA----- mirR 19 400
-----GGCTAGGCTCACAACCAAAAT----- mirR 21 351
-----AGGCTAGGCTCACAACCAAAAT----- mirR 22 331
-----CTAGGCTCACAACCAAAATA----- mirR 20 251
-----AGGCTCACAACCAAAATA----- mirR 18 145
-----AAGGCTAGGCTCACAACCAAAA----- mirR 22 109
-----TAGGCTCACAACCAAAATA----- mirR 19 107
-----AGGCTAGGCTCACAACCAAAA----- mirR 21 87
-----CTAGGCTCACAACCAAAAT----- mirR 19 39
-----GCTAGGCTCACAACCAAAAT----- mirR 20 37

```

```

-----GCTAGGCTCACAACCAAAATA----- mirR 21 32
-----GGCTAGGCTCACAACCAAAA----- mirR 20 30
-----GGCTAGGCTCACAACCAAAATA----- mirR 22 29
-----CTAGGCTCACAACCAAAA----- mirR 18 26
-----GGCTAGGCTCACAACCAAAA----- mirR 19 22
-----AGGCTAGGCTCACAACCAA----- mirR 19 17
-----GGCTAGGCTCACAACCAA----- mirR 18 15
-----GCTAGGCTCACAACCAAAA----- mirR 18 15
-----AGGCTAGGCTCACAACCAAAATA----- mirR 23 13
-----AGGCTAGGCTCACAACCA----- mirR 18 11
-----AGGCTAGGCTCACAACCAAAA----- mirR 20 11
-----AGGCTAGGCTCACAACCAAAATAT----- mirR 24 8
-----CTAGGCTCACAACCAAAATATA----- mirR 22 7
-----AAGGCTAGGCTCACAACCA----- mirR 19 6
-----GGCTAGGCTCACAACCAAAATATA----- mirR 24 6
-----AAGGCTAGGCTCACAACCAAAATA----- mirR 24 6
-----AAGGCTAGGCTCACAACCAAAATAT----- mirR 25 6
-----AAGGCTAGGCTCACAACCAAAA----- mirR 21 5
-----GCTAGGCTCACAACCAAAATATA----- mirR 23 5
-----AAGGCTAGGCTCACAACC----- mirR 18 5
-----GCTAGGCTCACAACCAAAATAT----- mirR 22 4
-----AAGGCTAGGCTCACAACCAAAAT----- mirR 23 4
-----GGCTAGGCTCACAACCAAAATAT----- mirR 23 4
-----CTAGGCTCACAACCAAAATAT----- mirR 21 3
-----TAGGCTCACAACCAAAATATAAGAA----- mirR 25 3
-----GCTAGGCTCACAACCAAAATATAA----- mirR 24 2
-----TAGGCTCACAACCAAAAT----- mirR 18 2
-----CTAGGCTCACAACCAAAATATAAGA----- mirR 25 1
-----AGGCTCACAACCAAAATATA----- mirR 20 1

```

>mmu-mir-3099

| CCAGCTTCCTTCCAGCCCTTGATGTTTAGTACGCACATAGGCTAGAGAGAGGTTGGGGATGGGGAAAGATGAG | species | len | reads |
|---------------------------------------------------------------------------|---------|-----|-------|
| CCAGCTTCCTTCCAGCCCTTG-----                                                | mirL    | 21  | 80    |
| CCAGCTTCCTTCCAGCCCTTGA-----                                               | mirL    | 22  | 26    |
| CCAGCTTCCTTCCAGCCCTT-----                                                 | mirL    | 20  | 15    |
| CCAGCTTCCTTCCAGCCC-----                                                   | mirL    | 18  | 5     |
| CCAGCTTCCTTCCAGCCCT-----                                                  | mirL    | 19  | 3     |
| -CAGCTTCCTTCCAGCCCTTG-----                                                | mirL    | 20  | 1     |
| -----TAGGCTAGAGAGAGGTTGG-----                                             | mirR    | 19  | 924   |
| -----TAGGCTAGAGAGAGGTTGGG-----                                            | mirR    | 20  | 421   |
| -----TAGGCTAGAGAGAGGTTGGGGA-----                                          | mirR    | 22  | 167   |
| -----TAGGCTAGAGAGAGGTTGGGG-----                                           | mirR    | 21  | 154   |
| -----TAGGCTAGAGAGAGGTTGGGGAT-----                                         | mirR    | 23  | 145   |
| -----TAGGCTAGAGAGAGGTTG-----                                              | mirR    | 18  | 88    |
| -----AGGCTAGAGAGAGGTTGG-----                                              | mirR    | 18  | 37    |
| -----AGGCTAGAGAGAGGTTGGG-----                                             | mirR    | 19  | 20    |

```
-----AGGCTAGAGAGAGGTTGGGGAT----- mirR 22 16
-----TAGGCTAGAGAGAGGTTGGGGATG----- mirR 24 9
-----AGGCTAGAGAGAGGTTGGGG----- mirR 20 7
-----AGGCTAGAGAGAGGTTGGGG----- mirR 21 6
-----AGGCTAGAGAGAGGTTGGGGATG----- mirR 23 2
-----GGCTAGAGAGAGGTTGGGG----- mirR 19 1
-----GGGATGGGAAAGATGAG morR 18 2
-----GGGGATGGGAAAGATGAG morR 19 1
```

>mmu-mir-130b

```
ACTGACAGGCTTGTGGACACTCTTTCCCTGTTGCACTACTGTGGCCCTCTGGGAAGCAGTGCAATGATGAAAGGGCATCTGTCGGGCCAGCTAAGGAGCC species len reads
ACTGACAGGCTTGTGG----- morL 18 1
-----ACTCTTTCCCTGTTGCACTACT----- mirL 22 447
-----ACTCTTTCCCTGTTGCACTAC----- mirL 21 247
-----ACTCTTTCCCTGTTGCACTA----- mirL 20 123
-----ACTCTTTCCCTGTTGCAC----- mirL 18 84
-----ACTCTTTCCCTGTTGCACT----- mirL 19 78
-----CACTCTTTCCCTGTTGCA----- mirL 18 9
-----CACTCTTTCCCTGTTGCACT----- mirL 20 5
-----ACACTCTTTCCCTGTTGCA----- mirL 19 5
-----CACTCTTTCCCTGTTGCACTA----- mirL 21 4
-----CACTCTTTCCCTGTTGCACTAC----- mirL 22 2
-----ACACTCTTTCCCTGTTGC----- mirL 18 1
-----CTCTTTCCCTGTTGCACTAC----- mirL 20 1
-----CACTCTTTCCCTGTTGCAC----- mirL 19 1
-----CTGTGGCCCTCTGGGAAG----- loop 18 1
-----CAGTGCAATGATGAAAGGGCATC----- mirR 23 436
-----CAGTGCAATGATGAAAGGGCAT----- mirR 22 287
-----CAGTGCAATGATGAAAGGGC----- mirR 20 185
-----CAGTGCAATGATGAAAGGGCA----- mirR 21 83
-----CAGTGCAATGATGAAAGGGCATCT----- mirR 24 43
-----AGTGCAATGATGAAAGGGCAT----- mirR 21 32
-----CAGTGCAATGATGAAAGGG----- mirR 19 21
-----AGTGCAATGATGAAAGGGCATC----- mirR 22 9
-----CAGTGCAATGATGAAAGG----- mirR 18 8
-----AGTGCAATGATGAAAGGGC----- mirR 19 7
-----AGTGCAATGATGAAAGGGCA----- mirR 20 4
-----AGTGCAATGATGAAAGGGCATCT----- mirR 23 2
-----GCAGTGCAATGATGAAAGGGCATCT----- mirR 25 1
-----CGGGCCAGCTAAGGAGCC morR 18 1
```

>mmu-mir-540

```
CATTCCTGGGGCTGGGCCAAGGGTCACCCTCTGACTCTGTGGCCAAGGGTAGACAGGTCAGAGGTCGATCCTGGGCCTACTCTGGGGCTCCTCC species len reads
CATTCCTGGGGCTGGGC----- morL 18 1
-----CAAGGGTCACCCTCTGACTCTGT----- mirL 23 817
-----CAAGGGTCACCCTCTGACTC----- mirL 20 145
```

```

-----CAAGGGTCACCCCTCTGACTCTG----- mirL 22 74
-----CAAGGGTCACCCCTCTGACTCT----- mirL 21 70
-----CAAGGGTCACCCCTCTGACT----- mirL 19 69
-----AAGGGTCACCCCTCTGACTCTGT----- mirL 22 5
-----AAGGGTCACCCCTCTGACTCTGTGG----- mirL 24 4
-----AAGGGTCACCCCTCTGACTCTGTG----- mirL 23 2
-----AGGGTCACCCCTCTGACTCTGT----- mirL 21 1
-----AAGGGTCACCCCTCTGACTCT----- mirL 20 1
-----CCAAGGGTCACCCCTCTGACTCTGT----- mirL 24 1
-----CCAAGGGTCACCCCTCTGACTCTGTG----- mirL 25 1
-----AGGTCAGAGGTCGATCCTGG----- mirR 20 292
-----AGGTCAGAGGTCGATCCTGGGC----- mirR 22 287
-----AGGTCAGAGGTCGATCCTGGG----- mirR 21 131
-----AGGTCAGAGGTCGATCCTGGGCC----- mirR 23 102
-----AGGTCAGAGGTCGATCCTG----- mirR 19 39
-----AGGTCAGAGGTCGATCCT----- mirR 18 29
-----AGGTCAGAGGTCGATCCTGGGCCT----- mirR 24 18
-----GTCAGAGGTCGATCCTGGG----- mirR 19 2
-----GTCAGAGGTCGATCCTGGGC----- mirR 20 1
-----ACAGGTCAGAGGTCGATCCTGGGC----- mirR 24 1
-----GGTCAGAGGTCGATCCTGGGCC----- mirR 22 1
-----CAGGTCAGAGGTCGATCCTGGGC----- mirR 23 1
-----TCAGAGGTCGATCCTGGGC----- mirR 19 1
-----GGTCAGAGGTCGATCCTGGGC----- mirR 21 1
-----TCAGAGGTCGATCCTGGG----- mirR 18 1
-----CTACTCTGGGGCTCCTCC morR 18 1
-----CCTACTCTGGGGCTCCTCC morR 19 1

```

>mmu-mir-3068

```

AATTGGAGTTCATGCAAGTTCTAACCAGCTTACTCAGTAGCTGGGTGAATTGCAGTACTCCAACATTCTG species len reads
--TTGGAGTTCATGCAAGTTCTA----- mirL 21 315
--TTGGAGTTCATGCAAGTTCTAA----- mirL 22 158
--TTGGAGTTCATGCAAGTTCTAACC----- mirL 24 110
--TTGGAGTTCATGCAAGTTCT----- mirL 20 83
--TTGGAGTTCATGCAAGTTCTAAC----- mirL 23 65
-ATTGGAGTTCATGCAAGTTCTA----- mirL 22 52
---TGGAGTTCATGCAAGTTCTA----- mirL 20 35
---TGGAGTTCATGCAAGTTCT----- mirL 19 21
---TGGAGTTCATGCAAGTTCTAA----- mirL 21 18
---TGGAGTTCATGCAAGTTCTAACC----- mirL 23 18
-ATTGGAGTTCATGCAAGTTCT----- mirL 21 12
---TGGAGTTCATGCAAGTTCTAACC----- mirL 24 11
-ATTGGAGTTCATGCAAGTTCTAA----- mirL 23 6
-ATTGGAGTTCATGCAAGTTCTAAC----- mirL 24 5
-ATTGGAGTTCATGCAAGT----- mirL 18 4
AATTGGAGTTCATGCAAGTTCTAA----- mirL 24 1

```

```
----GGAGTTCATGCAAGTTCTA----- mirL 19 1
AATTGGAGTTCATGCAAG----- mirL 18 1
----GAGTTCATGCAAGTTCTA----- mirL 18 1
-----GGTGAATTGCAGTACTCCAACA----- mirR 22 234
-----GGTGAATTGCAGTACTCCAA----- mirR 20 187
-----GGTGAATTGCAGTACTCCA----- mirR 19 167
-----GGTGAATTGCAGTACTCCAACAT---- mirR 23 99
-----GTGAATTGCAGTACTCCAACAT---- mirR 22 77
-----GGTGAATTGCAGTACTCCAAC----- mirR 21 67
-----GTGAATTGCAGTACTCCAACA----- mirR 21 46
-----TGAATTGCAGTACTCCAACAT---- mirR 21 45
-----GAATTGCAGTACTCCAACATTC-- mirR 22 43
-----GTGAATTGCAGTACTCCAA----- mirR 19 23
-----GTGAATTGCAGTACTCCAAC----- mirR 20 22
-----TGAATTGCAGTACTCCAACATTC-- mirR 23 19
-----GGTGAATTGCAGTACTCC----- mirR 18 18
-----TGAATTGCAGTACTCCAACA----- mirR 20 16
-----GGTGAATTGCAGTACTCCAACATTC-- mirR 24 7
-----GAATTGCAGTACTCCAACA----- mirR 19 7
-----TGAATTGCAGTACTCCAAC----- mirR 19 7
-----GTGAATTGCAGTACTCCA----- mirR 18 6
-----GAATTGCAGTACTCCAACATTC-- mirR 21 4
-----TGGGTGAATTGCAGTACTCCA----- mirR 21 4
-----GAATTGCAGTACTCCAACAT---- mirR 20 4
-----GAATTGCAGTACTCCAAC----- mirR 18 4
-----TGAATTGCAGTACTCCAACATTC-- mirR 24 3
-----GGGTGAATTGCAGTACTCCAACATTC-- mirR 26 2
-----TGGGTGAATTGCAGTACT----- mirR 18 2
-----TGAATTGCAGTACTCCAA----- mirR 18 2
-----GGGTGAATTGCAGTACTCCAACATTC-- mirR 27 2
-----TGAATTGCAGTACTCCAACATTC-- mirR 25 2
-----GTGAATTGCAGTACTCCAACATTC-- mirR 23 1
-----TGGGTGAATTGCAGTACTCCAAC----- mirR 23 1
-----TGGGTGAATTGCAGTACTCCAACAT---- mirR 25 1
-----GTGAATTGCAGTACTCCAACATTC-- mirR 24 1
-----GGGTGAATTGCAGTACTCCAACA----- mirR 23 1
-----GGGTGAATTGCAGTACTCCA----- mirR 20 1
-----GGGTGAATTGCAGTACTC----- mirR 18 1
-----CTGGGTGAATTGCAGTACTCCA----- mirR 22 1
-----CTGGGTGAATTGCAGTACT----- mirR 19 1
-----GAATTGCAGTACTCCAACATTC-- mirR 23 1
-----GGGTGAATTGCAGTACTCCAAC----- mirR 22 1

>mmu-mir-325
GCCGATATAGTGCTTGGTTCCTAGTAGGTGCTCAGTAAGTGTGGTGTGACATAATTCGTTTATTGAGCACCTCCTATCAATCAAGCACTGTGCTAGGCTCTGG species len reads
GCCGATATAGTGCTTGGTT----- morL 19 1
```

```

-----CCTAGTAGGTGCTCAGTAAGT----- mirL 21 603
-----CCTAGTAGGTGCTCAGTAAGTG----- mirL 22 215
-----CCTAGTAGGTGCTCAGTAAGTGT----- mirL 23 148
-----CCTAGTAGGTGCTCAGTAA----- mirL 19 87
-----CCTAGTAGGTGCTCAGTAAG----- mirL 20 67
-----AGTAGGTGCTCAGTAAGT----- mirL 18 2
-----CTAGTAGGTGCTCAGTAAGT----- mirL 20 1
-----TTTGTGACATAAATCGTTT----- loop 19 4
-----TTTGTGACATAAATCGTT----- loop 18 2
-----TTTATTGAGCACCTCCTATCA----- mirR 21 237
-----TTTATTGAGCACCTCCTATC----- mirR 20 235
-----TTTATTGAGCACCTCCTATCAA----- mirR 22 95
-----TTTATTGAGCACCTCCTA----- mirR 18 80
-----TTTATTGAGCACCTCCTAT----- mirR 19 76
-----TTATTGAGCACCTCCTATC----- mirR 19 55
-----TTATTGAGCACCTCCTATCA----- mirR 20 43
-----TTATTGAGCACCTCCTATCAA----- mirR 21 22
-----TTATTGAGCACCTCCTAT----- mirR 18 18
-----TTTATTGAGCACCTCCTATCAAT----- mirR 23 6
-----TTATTGAGCACCTCCTATCAAT----- mirR 22 3
-----TATTGAGCACCTCCTATCAA----- mirR 20 3
-----TTATTGAGCACCTCCTATCAATC----- mirR 23 3
-----TTTATTGAGCACCTCCTATCAATC----- mirR 24 2
-----TATTGAGCACCTCCTATCA----- mirR 19 2
-----TTATTGAGCACCTCCTATCAATCAAG----- mirR 26 1
-----GTTTATTGAGCACCTCCT----- mirR 18 1
-----AAGCACTGTGCTAGGCTCT-- morR 19 25
-----AAGCACTGTGCTAGGCTCTGG morR 21 2
-----AAGCACTGTGCTAGGCTCTG- morR 20 2
-----TCAAGCACTGTGCTAGGCTCTGG morR 23 1
-----TCAAGCACTGTGCTAGGCT--- morR 19 1
-----TCAAGCACTGTGCTAGGCTCT-- morR 21 1
-----AAGCACTGTGCTAGGCTC--- morR 18 1

```

>mmu-mir-1981

```

GGTGTGAGCTGTCCAGGTAAAGGCTGGGCTTAGACGTGGCCTTTGGGTGGAATGCACTTCCGTTTGTAAACCGCCATCTAACCCTGGCCTTTGACAGGTGCGTTCTGACTACAGTGG species len reads
GGTGTGAGCTGTCCAG----- morL 18 1
-----GTAAAGGCTGGGCTTAGACGTG----- mirL 22 624
-----GTAAAGGCTGGGCTTAGACGTGG----- mirL 23 255
-----GTAAAGGCTGGGCTTAGACGT----- mirL 21 251
-----GTAAAGGCTGGGCTTAGAC----- mirL 19 205
-----GTAAAGGCTGGGCTTAGACGTGGCC----- mirL 25 170
-----AAGGCTGGGCTTAGACGTGGC----- mirL 21 1
-----TAAAGGCTGGGCTTAGACGTG----- mirL 21 1
-----AAAGGCTGGGCTTAGACGT----- mirL 19 1
-----CATCTAACCCTGGCCTTTGACA----- mirR 22 165

```



```

-----CATCTAACCCCTGGCCTTTGAC----- mirR 21 85
-----CATCTAACCCCTGGCCTTTGA----- mirR 20 67
-----CATCTAACCCCTGGCCTTTG----- mirR 19 47
-----CATCTAACCCCTGGCCTTTGACAG----- mirR 23 31
-----CATCTAACCCCTGGCCTTT----- mirR 18 30
-----CATCTAACCCCTGGCCTTTGACAG----- mirR 24 29
-----ATCTAACCCCTGGCCTTTGACAG----- mirR 23 13
-----ATCTAACCCCTGGCCTTTGAC----- mirR 20 4
-----CGCCATCTAACCCCTGGCC----- mirR 18 2
-----ATCTAACCCCTGGCCTTTG----- mirR 18 1
-----ATCTAACCCCTGGCCTTTGACAGGTG----- mirR 25 1
-----ATCTAACCCCTGGCCTTTGACAG----- mirR 22 1
-----AGGTGCGTTCTGACTACAGTGG morR 22 1

```

>mmu-mir-1198

```

TTTGTTTGTGACAGTTGTCTGTTATGTGTTCCCTGGCTGGCTTGGTACTCATGTGTAGCCCAAGCTAGCCTCTAACTCATGGCAGTCATCCTGTCTCAG species len reads
TTTGTTTGTGACAGTTGTCT----- morL 20 3
--TTGTTTGTGACAGTTGTCTG----- morL 20 2
--TGTTTGTGACAGTTGTCT----- morL 18 1
--TTGTTTGTGACAGTTGTCT----- morL 18 1
-----TATGTGTTCCCTGGCTGGCTTGG----- mirL 22 869
-----TATGTGTTCCCTGGCTGGCTTG----- mirL 21 437
-----TATGTGTTCCCTGGCTGGCTTGGT----- mirL 23 199
-----TATGTGTTCCCTGGCTGGC----- mirL 18 168
-----TATGTGTTCCCTGGCTGGCTT----- mirL 20 90
-----ATGTGTTCCCTGGCTGGCTTGG----- mirL 21 69
-----ATGTGTTCCCTGGCTGGCTTG----- mirL 20 62
-----ATGTGTTCCCTGGCTGGCTTGGT----- mirL 22 27
-----ATGTGTTCCCTGGCTGGCTT----- mirL 19 19
-----ATGTGTTCCCTGGCTGGCT----- mirL 18 9
-----TTATGTGTTCCCTGGCTGGCTTGGTA----- mirL 25 1
-----TTATGTGTTCCCTGGCTGGCTTGG----- mirL 23 1
-----GTACTCATGTGTAGCCCAA----- loop 19 1
-----TACTCATGTGTAGCCCAA----- loop 18 1
-----AAGCTAGCCTCTAACTCATGG----- mirR 21 11
-----AAGCTAGCCTCTAACTCATGGC----- mirR 22 9
-----AAGCTAGCCTCTAACTCAT----- mirR 19 2
-----AAGCTAGCCTCTAACTCATGGCA----- mirR 23 1
-----AAGCTAGCCTCTAACTCA----- mirR 18 1
-----TGGCAGTCATCCTGTCTCAG morR 20 1

```

>mmu-mir-1224

```

GTGAGGACTGGGGAGGTGGAGGGTAGCATCATTAGAGCCAGAGCTCTGTCTCAGCTCCCTCTCCCCCACCTTCTCTCCTCAGGTACGACTGCAAGAGGCAC species len reads
GTGAGGACTGGGGAGGTGGAG----- mirL 21 211
GTGAGGACTGGGGAGGTGGA----- mirL 20 123
GTGAGGACTGGGGAGGTGGAG----- mirL 22 97

```

```

GTGAGGACTGGGGAGGTGGAGGGT----- mirL 24 84
GTGAGGACTGGGGAGGTGG----- mirL 19 64
--GAGGACTGGGGAGGTGGA----- mirL 18 3
---AGGACTGGGGAGGTGGAGG----- mirL 19 3
--GAGGACTGGGGAGGTGGAGGGTAGC----- mirL 25 1
-TGAGGACTGGGGAGGTGGAGG----- mirL 21 1
-----CCCCACCTCTTCTCTCCTCAGG----- mirR 22 681
-----CCCCACCTCTTCTCTCCTC----- mirR 19 299
-----CCCCACCTCTTCTCTCCTCAG----- mirR 21 141
-----CCCCACCTCTTCTCTCCTCA----- mirR 20 113
-----CCCCACCTCTTCTCTCCTCAGGT----- mirR 23 57
-----CCCCACCTCTTCTCTCCT----- mirR 18 28
-----CCCCACCTCTTCTCTCCTCAGGTA----- mirR 24 12
-----CCCACCTCTTCTCTCCTCAGG----- mirR 21 11
-----CCCACCTCTTCTCTCCTC----- mirR 18 11
-----CCCACCTCTTCTCTCCTCA----- mirR 19 9
-----CCCACCTCTTCTCTCCTCAG----- mirR 20 8
-----CCCACCTCTTCTCTCCTCAGGT----- mirR 22 7
-----CCCCCACCTCTTCTCTC----- mirR 18 1
-----CCACCTCTTCTCTCCTCAGG----- mirR 20 1
-----TACGACTGCAAGAGGCAC morR 18 1

>mmu-mir-377
TGTGCTGACGTTTGATTCTTGAGCAGAGGTTGCCCTTGGTGAATTCGCTTTATTGATGTTGAATCACACAAAGGCAACTTTTGTGTTGAGTATCAAAGCCTGCTTG species len reads
TGTGCTGACGTTTGATTCTTGAG----- morL 23 1
-----AGAGGTTGCCCTTGGTGAATTC----- mirL 22 180
-----AGAGGTTGCCCTTGGTGAATT----- mirL 21 67
-----AGAGGTTGCCCTTGGTGAAT----- mirL 20 53
-----AGAGGTTGCCCTTGGTGA----- mirL 18 13
-----AGGTTGCCCTTGGTGAATTCGC----- mirL 22 12
-----AGAGGTTGCCCTTGGTGAATTCG----- mirL 23 8
-----GAGGTTGCCCTTGGTGAATTC----- mirL 21 5
-----GAGGTTGCCCTTGGTGAATTCGC----- mirL 23 4
-----GAGGTTGCCCTTGGTGAATTCG----- mirL 22 4
-----GAGGTTGCCCTTGGTGAATT----- mirL 20 3
-----AGGTTGCCCTTGGTGAATTCGCT----- mirL 23 2
-----GGTTGCCCTTGGTGAATTCGCTTT----- mirL 24 1
-----GAGGTTGCCCTTGGTGA----- mirL 18 1
-----TGAATCACACAAAGGCAACTTTT----- mirR 23 568
-----TGAATCACACAAAGGCAAC----- mirR 19 270
-----TGAATCACACAAAGGCAACT----- mirR 20 144
-----TGAATCACACAAAGGCAACTTT----- mirR 22 80
-----TGAATCACACAAAGGCAACTTTTG----- mirR 24 59
-----ATCACACAAAGGCAACTTTTGT----- mirR 22 56
-----TGAATCACACAAAGGCAACTT----- mirR 21 54
-----GAATCACACAAAGGCAACTTT----- mirR 22 48

```

```

-----TGAATCACACAAAGGCAA----- mirR 18 39
-----ATCACACAAAGGCAACTTTTG----- mirR 21 25
-----AATCACACAAAGGCAACTTTTG----- mirR 22 20
-----AATCACACAAAGGCAACTTTTGT----- mirR 23 17
-----ATCACACAAAGGCAACTTT----- mirR 19 16
-----AATCACACAAAGGCAACTTTT----- mirR 21 13
-----ATCACACAAAGGCAACTTTT----- mirR 20 11
-----GAATCACACAAAGGCAACT----- mirR 19 11
-----ATCACACAAAGGCAACTTTTGT----- mirR 23 11
-----AATCACACAAAGGCAACTTTTGT----- mirR 24 6
-----GAATCACACAAAGGCAAC----- mirR 18 6
-----ATCACACAAAGGCAACT----- mirR 18 5
-----GAATCACACAAAGGCAACT----- mirR 20 3
-----GAATCACACAAAGGCAACTTTTG----- mirR 23 2
-----GAATCACACAAAGGCAACTTT----- mirR 21 2
-----AATCACACAAAGGCAACT----- mirR 19 1
-----AATCACACAAAGGCAACT----- mirR 18 1
-----GAATCACACAAAGGCAACTTTTGT----- mirR 25 1
-----ATCACACAAAGGCAACTTTTGT----- mirR 24 1
-----AATCACACAAAGGCAACTTT----- mirR 20 1
-----TTTGTTTGAGTATCAAAG----- morR 18 1
-----TGAGTATCAAAGCCTGCTTG----- morR 20 1

>mmu-mir-760
GCCTCGGTGCGGGGCGCGTCGCCCCCTCAGGCCACCAGAGCCCGGATACCTCAGAAATCGGCTCTGGGTCTGTGGGGAGCGAAATGCAACCCAAACCCCGTTTC species len reads
-----GGTGCAGGGGCGCGTCGCC----- morL 18 3
-----TGCGGGGCGCGTCGCCCC----- morL 19 1
GCCTCGGTGCGGGGCGCGTC----- morL 20 1
-----CCCCTCAGGCCACCAGAGC----- mirL 19 109
-----CCCCTCAGGCCACCAGAGCC----- mirL 20 40
-----CCCCTCAGGCCACCAGAGCCCG----- mirL 22 29
-----CCCCTCAGGCCACCAGAGCCCGG----- mirL 23 28
-----CCCCTCAGGCCACCAGAGCCCGGATA----- mirL 26 21
-----CCTCAGGCCACCAGAGCCCGGATAC----- mirL 25 2
-----CCCCCTCAGGCCACCAGA----- mirL 18 2
-----CTCAGGCCACCAGAGCCCGGATA----- mirL 23 1
-----CCTCAGGCCACCAGAGCC----- mirL 18 1
-----CCCCTCAGGCCACCAGAGC----- mirL 20 1
-----CCCCCTCAGGCCACCAGA----- mirL 19 1
-----CCCTCAGGCCACCAGAGCC----- mirL 20 1
-----CCTCAGGCCACCAGAGCCCGGA----- mirL 22 1
-----GCCCGGATACCTCAGAAA----- loop 18 3
-----CGGCTCTGGGTCTGTGGGGAG----- mirR 22 319
-----CGGCTCTGGGTCTGTGGGGAG----- mirR 21 229
-----CGGCTCTGGGTCTGTGGGGGA----- mirR 20 187
-----CGGCTCTGGGTCTGTGGGG----- mirR 19 165

```

```

-----TCGGCTCTGGGTCTGTGGGGAGC----- mirR 23 123
-----TCGGCTCTGGGTCTGTGGGG----- mirR 20 111
-----TCGGCTCTGGGTCTGTGGGGAG----- mirR 22 73
-----CGGCTCTGGGTCTGTGGGGAGCG----- mirR 23 59
-----CGGCTCTGGGTCTGTGGGGAGCGA----- mirR 24 57
-----TCGGCTCTGGGTCTGTGGG----- mirR 19 55
-----TCGGCTCTGGGTCTGTGGGGA----- mirR 21 51
-----TCGGCTCTGGGTCTGTGG----- mirR 18 38
-----CGGCTCTGGGTCTGTGGG----- mirR 18 30
-----CTCTGGGTCTGTGGGGAGCGA----- mirR 21 18
-----CTCTGGGTCTGTGGGGAGC----- mirR 19 16
-----TCGGCTCTGGGTCTGTGGGGAGCG----- mirR 24 14
-----CTCTGGGTCTGTGGGGAG----- mirR 18 6
-----CTCTGGGTCTGTGGGGAGCGAA----- mirR 22 4
-----CTCTGGGTCTGTGGGGAGCGAAA----- mirR 23 4
-----TTCGGCTCTGGGTCTGTGGGG----- mirR 21 1
-----ATTCGGCTCTGGGTCTGTGGGG----- mirR 22 1
-----GGCTCTGGGTCTGTGGGG----- mirR 18 1
-----TTCGGCTCTGGGTCTGTGGGGAG----- mirR 23 1
-----GGCTCTGGGTCTGTGGGGAG----- mirR 20 1
-----CTCTGGGTCTGTGGGGAGCG----- mirR 20 1
-----GGCTCTGGGTCTGTGGGGA----- mirR 19 1
-----GCTCTGGGTCTGTGGGGAGCG----- mirR 21 1
-----TTCGGCTCTGGGTCTGTGG----- mirR 19 1
-----CGAAATGCAACCCAAACCCCGTTTC morR 25 4
-----CGAAATGCAACCCAAACCCCGT--- morR 22 1
-----CGAAATGCAACCCAAACCC----- morR 19 1

```

>mmu-mir-505

```

GGGAGCCAGGAAGTATTGATGTTTCTGCCAGGTTAGCGTCAACACTTGCTGGTTTTCTCTCTGGAGTATCACCAAGTTC species len reads
GGGAGCCAGGAAGTATTGATGTT----- mirL 23 490
GGGAGCCAGGAAGTATTGATGT----- mirL 22 191
GGGAGCCAGGAAGTATTGA----- mirL 19 80
GGGAGCCAGGAAGTATTGAT----- mirL 20 46
GGGAGCCAGGAAGTATTGATGTTTC----- mirL 25 43
-GGAGCCAGGAAGTATTGATGTT----- mirL 22 3
---AGCCAGGAAGTATTGATGT----- mirL 19 1
-GGAGCCAGGAAGTATTGATGTTTC----- mirL 24 1
-GGAGCCAGGAAGTATTGATGT----- mirL 21 1
-----CGTCAACACTTGCTGGTTTTCTC----- mirR 23 255
-----GTCAACACTTGCTGGTTTTCTC----- mirR 22 145
-----CGTCAACACTTGCTGGTTTTCTC----- mirR 21 90
-----CGTCAACACTTGCTGGTTTTCTC----- mirR 22 64
-----GTCAACACTTGCTGGTTTTCTC----- mirR 21 51
-----TCAACACTTGCTGGTTTTCTC----- mirR 23 43
-----GTCAACACTTGCTGGTTTTCTC----- mirR 20 39

```

```

-----CGTCAACACTTGCTGGTTTTCTCT----- mirR 24 39
-----GTCAACACTTGCTGGTTTTCTCT----- mirR 23 39
-----CGTCAACACTTGCTGGTTTT----- mirR 20 35
-----GTCAACACTTGCTGGTTTTCTCT----- mirR 24 27
-----CGTCAACACTTGCTGGTT----- mirR 18 27
-----CGTCAACACTTGCTGGTTTTCTCT----- mirR 25 25
-----TCAACACTTGCTGGTTTTCTCT----- mirR 21 16
-----TCAACACTTGCTGGTTTTCT----- mirR 20 14
-----TCAACACTTGCTGGTTTTCT----- mirR 19 9
-----TCAACACTTGCTGGTTTTCTCT----- mirR 22 9
-----GTCAACACTTGCTGGTTT----- mirR 18 6
-----GTCAACACTTGCTGGTTTT----- mirR 19 5
-----TCAACACTTGCTGGTTTT----- mirR 18 4
-----TCAACACTTGCTGGTTTTCTCT----- mirR 24 3
-----CAACACTTGCTGGTTTTCTCT----- mirR 20 1
-----TAGCGTCAACACTTGCTGGT----- mirR 20 1
-----CAACACTTGCTGGTTTTCTCT----- mirR 22 1
-----GCGTCAACACTTGCTGGT----- mirR 18 1
-----CAACACTTGCTGGTTTTCTCT----- mirR 21 1
-----TAGCGTCAACACTTGCTG----- mirR 18 1
-----TGGAGTATCACCAAGTTC morR 18 1

```

>mmu-mir-448

```

TTCCCATGGACGAGGAGGTTGAACATCCTGCATAGTGTGCCAGGAAATCCCTACTTCATACTAAGAGGGGGCTGGCTGGTTGCATATGTAGGATGTCCCATCTCTGGCCCACTTCGTCAT species len read
---CCATGGACGAGGAGGTTGA----- morL 19 2
TTCCCATGGACGAGGAGG----- morL 18 1
TTCCCATGGACGAGGAGGTTG----- morL 21 1
-----GAACATCCTGCATAGTGTGCC----- mirL 22 339
-----GAACATCCTGCATAGTGC----- mirL 18 170
-----AACATCCTGCATAGTGTGCCA----- mirL 22 102
-----AACATCCTGCATAGTGTGCC----- mirL 21 100
-----GAACATCCTGCATAGTGTGC----- mirL 21 75
-----AACATCCTGCATAGTGTGC----- mirL 20 67
-----AACATCCTGCATAGTGTGCCAG----- mirL 23 54
-----GAACATCCTGCATAGTGTCT----- mirL 19 32
-----GAACATCCTGCATAGTGTGCCA----- mirL 23 31
-----AACATCCTGCATAGTGTGCCAG----- mirL 24 14
-----ACATCCTGCATAGTGTGC----- mirL 19 1
-----ACATCCTGCATAGTGTGCC----- mirL 20 1
-----TTGAACATCCTGCATAGTGTGCC----- mirL 24 1
-----TGAACATCCTGCATAGTGTGCC----- mirL 23 1
-----TTGCATATGTAGGATGTCCCAT----- mirR 22 211
-----TTGCATATGTAGGATGTCCATC----- mirR 23 197
-----TTGCATATGTAGGATGTCCCA----- mirR 21 175
-----TTGCATATGTAGGATGTCCC----- mirR 20 64
-----TTGCATATGTAGGATGTCC----- mirR 19 64

```

```

-----TGCATATGTAGGATGTCCCA----- mirR 20 14
-----TGCATATGTAGGATGTCCCAT----- mirR 21 12
-----GTTGCATATGTAGGATGTCC----- mirR 20 9
-----TTGCATATGTAGGATGTCCCATCT----- mirR 24 7
-----TGCATATGTAGGATGTCCCATC----- mirR 22 6
-----TTGCATATGTAGGATGTCC----- mirR 18 6
-----TGCATATGTAGGATGTCC----- mirR 19 4
-----GTTGCATATGTAGGATGTCCCA----- mirR 22 4
-----GTTGCATATGTAGGATGTCCCAT----- mirR 23 2
-----TGCATATGTAGGATGTCC----- mirR 18 1
-----GTTGCATATGTAGGATGT----- mirR 18 1
-----GTTGCATATGTAGGATGTCC----- mirR 19 1
-----CATATGTAGGATGTCCCAT----- mirR 19 1
-----CATATGTAGGATGTCCCATCT----- mirR 21 1
-----CTCCTGGCCCACTTCGTCAT morR 20 1
-----CTCCTGGCCCACTTCGTC-- morR 18 1

```

>mmu-mir-3106

```

TGTCCCCAGGGAAGCACAGGTGGCTCATTTAGAAGCAGCCATACTCAGAGAGTGGCTGCCTATACATGGGCTTTCCTG species len reads
TGTCCCCAGGGAAGCACACA----- morL 18 1
-GTCCCAGGGAAGCACAG----- morL 18 1
-----TGGCTCATTTAGAAGCAGCCA----- mirL 21 920
-----TGGCTCATTTAGAAGCAGCC----- mirL 20 391
-----TGGCTCATTTAGAAGCAGC----- mirL 19 139
-----TGGCTCATTTAGAAGCAGCCAT----- mirL 22 65
-----GGCTCATTTAGAAGCAGCCA----- mirL 20 27
-----TGGCTCATTTAGAAGCAGCCATA----- mirL 23 23
-----GGCTCATTTAGAAGCAGCC----- mirL 19 16
-----GGCTCATTTAGAAGCAGC----- mirL 18 6
-----GGCTCATTTAGAAGCAGCCAT----- mirL 21 3
-----GGCTCATTTAGAAGCAGCCATA----- mirL 22 2
-----GTGGCTCATTTAGAAGCA----- mirL 18 1
-----GCTGCCTATACATGGGCTTTC-- mirR 22 92
-----GCTGCCTATACATGGGCTTTC-- mirR 21 19
-----GCTGCCTATACATGGGCTTTCCT-- mirR 23 7
-----CTGCCTATACATGGGCTTTCCT-- mirR 22 7
-----CTGCCTATACATGGGCTTTC-- mirR 21 5
-----GTGGCTGCCTATACATGGGCTTTC-- mirR 25 4
-----GGCTGCCTATACATGGGCTTTC-- mirR 23 3
-----TGGCTGCCTATACATGGGCTTTC-- mirR 24 3
-----GCTGCCTATACATGGGCTTTCCTG mirR 24 2
-----GCTGCCTATACATGGGCTTTC-- mirR 20 2
-----GGCTGCCTATACATGGGCTTTC-- mirR 22 2
-----CTGCCTATACATGGGCTTTCCTG mirR 23 1
-----GCTGCCTATACATGGGCTTTC-- mirR 19 1
-----GGCTGCCTATACATGGGC----- mirR 18 1

```

```

-----GCTGCCTATACATGGGCT----- mirR 18 1

>mmu-mir-494
TTGATACTGAAGGAGAGGTTGTCCGTGTTGTCTTCTTTATTTATGATGAAACATACACGGGAAACCTCTTTTTTAGTATCAAATCCCAC species len reads
TTGATACTGAAGGAGAG----- morL 18 1
-----AGGTTGTCCGTGTTGTCTTC----- mirL 20 4
-----AGGTTGTCCGTGTTGTCTTCT----- mirL 21 3
-----AGGTTGTCCGTGTTGTCTTCT----- mirL 22 2
-----TTGTCCGTGTTGTCTTCTC----- mirL 19 1
-----GTGTCCGTGTTGTCTTC----- mirL 18 1
-----AGGTTGTCCGTGTTGTCTTCTCT----- mirL 23 1
-----GAGAGGTTGTCCGTGTTGTCTTC----- mirL 23 1
-----TTCTCTTTATTTATGATG----- loop 18 1
-----TGAAACATACACGGGAAACCTC----- mirR 22 791
-----TGAAACATACACGGGAAACCTCT----- mirR 23 422
-----TGAAACATACACGGGAAACC----- mirR 20 133
-----TGAAACATACACGGGAAAC----- mirR 19 88
-----GAAACATACACGGGAAACCTCT----- mirR 22 70
-----TGAAACATACACGGGAAACCTCT----- mirR 24 55
-----TGAAACATACACGGGAAACCT----- mirR 21 33
-----GAAACATACACGGGAAACCTC----- mirR 21 9
-----TGAAACATACACGGGAAA----- mirR 18 9
-----GAAACATACACGGGAAACCTCT----- mirR 23 6
-----GAAACATACACGGGAAAC----- mirR 18 4
-----GAAACATACACGGGAAACC----- mirR 19 4
-----AACATACACGGGAAACCTCTTT----- mirR 22 4
-----AACATACACGGGAAACCTC----- mirR 19 2
-----AAACATACACGGGAAACCTCT----- mirR 21 1
-----AACATACACGGGAAACCTCT----- mirR 21 1
-----TTTTAGTATCAAATCCCAC morR 18 1

>mmu-mir-764
GCAGGTGCTCACATGTCCTCCTCCATGCTTATAAATACATGGAGGAGGCCATAGTGCGCAACTGTCA species len reads
---GGTGCTCACATGTCCTCCTCCA----- mirL 22 551
---GGTGCTCACATGTCCTCCTCCAT----- mirL 23 245
---GGTGCTCACATGTCCTCCTCC----- mirL 21 119
---GGTGCTCACATGTCCTCCTC----- mirL 20 65
---GGTGCTCACATGTCCTCCT----- mirL 19 35
---AGGTGCTCACATGTCCTCCTCCA----- mirL 23 2
---TGCTCACATGTCCTCCTCCATG----- mirL 22 1
---AGGTGCTCACATGTCCTC----- mirL 18 1
---TGCTCACATGTCCTCCTCCAT----- mirL 21 1
---GTGCTCACATGTCCTCCTCCAT----- mirL 22 1
---AGGTGCTCACATGTCCTCCTCC----- mirL 22 1
GCAGGTGCTCACATGTCCTCCTCCAT----- mirL 26 1
-----ATGCTTATAAATACATGG----- loop 18 1

```

```

-----GAGGAGGCCATAGTGGCAACTGTC- mirR 24 293
-----GAGGAGGCCATAGTGGCAACTGT-- mirR 23 161
-----GAGGAGGCCATAGTGGCAACTG--- mirR 22 39
-----GAGGAGGCCATAGTGGCAAC----- mirR 20 28
-----GAGGAGGCCATAGTGGCAACT--- mirR 21 18
-----AGGAGGCCATAGTGGCAACTGT-- mirR 22 8
-----AGGAGGCCATAGTGGCAACTGTC- mirR 23 8
-----GAGGAGGCCATAGTGGCAACTGTCA mirR 25 7
-----GAGGAGGCCATAGTGGCAA----- mirR 19 2
-----AGGAGGCCATAGTGGCAACT--- mirR 20 2
-----AGGAGGCCATAGTGGCAACTG--- mirR 21 1
-----TGGAGGAGGCCATAGTGGCAACTGT-- mirR 25 1
-----TGGAGGAGGCCATAGTGGCAAC----- mirR 22 1
-----AGGAGGCCATAGTGGCAA----- mirR 18 1

```

>mmu-mir-298

| Sequence                                                                               | species | len | reads |
|----------------------------------------------------------------------------------------|---------|-----|-------|
| TGGCAGAGGAGGGCTGTTCTTCCCTTGTAGTTTTATGACTGGGAGGAAGTAGCCTTCTCTCAGCTTAGGAGTGGGCCAACAGCTTC | mirL    | 20  | 383   |
| -GGCAGAGGAGGGCTGTTCTT-                                                                 | mirL    | 22  | 382   |
| -GGCAGAGGAGGGCTGTTCTTCC-                                                               | mirL    | 23  | 321   |
| -GGCAGAGGAGGGCTGTTCTTCC-                                                               | mirL    | 21  | 273   |
| -GGCAGAGGAGGGCTGTTCT-                                                                  | mirL    | 19  | 162   |
| ---CAGAGGAGGGCTGTTCTTCC-                                                               | mirL    | 21  | 16    |
| ---CAGAGGAGGGCTGTTCTTCC-                                                               | mirL    | 19  | 5     |
| ---CAGAGGAGGGCTGTTCTT-                                                                 | mirL    | 18  | 2     |
| ---CAGAGGAGGGCTGTTCTTCC-                                                               | mirL    | 20  | 2     |
| --GCAGAGGAGGGCTGTTCTTCC-                                                               | mirL    | 20  | 2     |
| --GCAGAGGAGGGCTGTTCTTCC-                                                               | mirL    | 21  | 1     |
| TGGCAGAGGAGGGCTGTTCTTCC-                                                               | mirL    | 24  | 1     |
| --GCAGAGGAGGGCTGTTCTT-                                                                 | mirL    | 19  | 1     |
| ---CAGAGGAGGGCTGTTCTTCCCT-                                                             | mirL    | 22  | 1     |
| -----AGGAACTAGCCTTCTCTCAGCTT-                                                          | mirR    | 23  | 6     |
| -----AGGAACTAGCCTTCTCTC-                                                               | mirR    | 18  | 6     |
| -----AGGAACTAGCCTTCTCTCAGCTTA-                                                         | mirR    | 24  | 5     |
| -----GAGGAACTAGCCTTCTCTC-                                                              | mirR    | 19  | 4     |
| -----AGGAACTAGCCTTCTCTCA-                                                              | mirR    | 19  | 2     |
| -----GAGGAACTAGCCTTCTCTCAGCTTA-                                                        | mirR    | 25  | 1     |
| -----AGGAACTAGCCTTCTCTCAGC-                                                            | mirR    | 21  | 1     |
| -----GAGGAACTAGCCTTCTCTCAGCTT-                                                         | mirR    | 24  | 1     |
| -----GAGGAACTAGCCTTCTCTCAGC-                                                           | mirR    | 22  | 1     |
| -----AGGAACTAGCCTTCTCTCAGCT-                                                           | mirR    | 22  | 1     |
| -----AGGAGTGGGCCAACAGCT--                                                              | morR    | 18  | 3     |
| -----GAGTGGGCCAACAGCTTC                                                                | morR    | 18  | 1     |

>mmu-mir-467e

| Sequence                                                                                        | species | len | reads |
|-------------------------------------------------------------------------------------------------|---------|-----|-------|
| TCCTATGTATGTGCCTGTGTGCATAAGTGTGAGCATGTATATGTGTATATTTATGCATATACATACACACACCTATATACACATGCACACAGACA |         |     |       |



```

TCCTATGTATGTGCCTGTGTG----- morL 22 3
-----ATAAGTGTGAGCATGTATATGT----- mirL 22 702
-----ATAAGTGTGAGCATGTATAT----- mirL 20 147
-----TAAGTGTGAGCATGTATATGT----- mirL 21 126
-----ATAAGTGTGAGCATGTATATG----- mirL 21 107
-----TAAGTGTGAGCATGTATATGTGT----- mirL 23 94
-----TAAGTGTGAGCATGTATATGTG----- mirL 22 60
-----ATAAGTGTGAGCATGTATATGTG----- mirL 23 55
-----TAAGTGTGAGCATGTATAT----- mirL 19 40
-----TAAGTGTGAGCATGTATATG----- mirL 20 28
-----ATAAGTGTGAGCATGTATA----- mirL 19 23
-----AAGTGTGAGCATGTATATGT----- mirL 20 20
-----AAGTGTGAGCATGTATATGTGT----- mirL 22 18
-----AAGTGTGAGCATGTATATGTG----- mirL 21 7
-----AAGTGTGAGCATGTATAT----- mirL 18 5
-----ATATACACATGCACACAGAC- mirR 20 2
-----TATACACATGCACACAGAC- mirR 19 1
-----ATATACACATGCACACAGACA mirR 21 1

```

>mmu-mir-1193

```

TGGATGGTAGACCGGTGACGTACACTTCATTTATGCTGTAGGTCACCCGTTTTACTATCCACCAACACCCAGACCATCTGTGG species len reads
---ATGGTAGACCGGTGACGTAC----- mirL 20 10
---ATGGTAGACCGGTGACGTACA----- mirL 21 7
---TGGTAGACCGGTGACGTACA----- mirL 20 3
TGGATGGTAGACCGGTGA----- mirL 18 3
---ATGGTAGACCGGTGACGT----- mirL 18 3
---ATGGTAGACCGGTGACGTACAC----- mirL 22 1
---TGGTAGACCGGTGACGTACACT----- mirL 22 1
--GGATGGTAGACCGGTGACG----- mirL 19 1
---TGGTAGACCGGTGACGTACAC----- mirL 21 1
--GATGGTAGACCGGTGACG----- mirL 18 1
-----TACACTTCATTTATGCTG----- loop 18 1
-----TAGGTCACCCGTTTTACTATCC----- mirR 22 810
-----TAGGTCACCCGTTTTACTAT----- mirR 20 243
-----TAGGTCACCCGTTTTACTATC----- mirR 21 224
-----AGGTCACCCGTTTTACTATCC----- mirR 21 35
-----TAGGTCACCCGTTTTACTA----- mirR 19 25
-----AGGTCACCCGTTTTACTAT----- mirR 19 15
-----TAGGTCACCCGTTTTACT----- mirR 18 15
-----AGGTCACCCGTTTTACTATC----- mirR 20 8
-----TAGGTCACCCGTTTTACTATCCA----- mirR 23 5
-----TGTAGGTCACCCGTTTTACTAT----- mirR 22 5
-----TAGGTCACCCGTTTTACTATCCACC----- mirR 25 3
-----TGTAGGTCACCCGTTTTACTATC----- mirR 23 3
-----GTAGGTCACCCGTTTTAC----- mirR 18 2
-----TGTAGGTCACCCGTTTTACTATCC----- mirR 24 2

```

```
-----GTAGGTCACCCGTTTTACTAT----- mirR 21 1
-----TGTAGGTCACCCGTTTTAC----- mirR 19 1
-----AACACCCAGACCATCTGTG----- morR 19 2
-----CCACCAACACCCAGACCAT----- morR 19 1
-----CCAACACCCAGACCATCTGTGG morR 22 1
```

>mmu-mir-1191

```
ATCTGTGAGTTTGAACAGCCTGGTCTACATAGCAACATCTAAGCCAGCCAGGGCTACATAGTGAGAACCTGCCTCAAAGCAAACAGCAGTCTTACTATGTAGCCCTAGATGGCCTAGAACTCCCT species le
ATCTGTGAGTTTGAAC----- morL 18 1
-----CAGCCTGGTCTACATAGCA----- mirL 19 2
-----CAGTCTTACTATGTAGCCCTAG----- mirR 22 635
-----AGTCTTACTATGTAGCCCTAG----- mirR 21 221
-----CAGTCTTACTATGTAGCCCTA----- mirR 21 186
-----CAGTCTTACTATGTAGCCC----- mirR 19 136
-----CAGTCTTACTATGTAGCC----- mirR 18 37
-----CAGTCTTACTATGTAGCCCT----- mirR 20 30
-----AGTCTTACTATGTAGCCC----- mirR 18 24
-----AGTCTTACTATGTAGCCCTA----- mirR 20 15
-----AGTCTTACTATGTAGCCCTAGA----- mirR 22 15
-----CAGTCTTACTATGTAGCCCTAGA----- mirR 23 10
-----AGTCTTACTATGTAGCCCT----- mirR 19 8
-----GCAGTCTTACTATGTAGCCCTA----- mirR 22 5
-----GCAGTCTTACTATGTAGCCC----- mirR 20 4
-----AGTCTTACTATGTAGCCCTAGAT----- mirR 23 3
-----CAGTCTTACTATGTAGCCCTAGATG----- mirR 25 1
-----GCAGTCTTACTATGTAGCCCTAG----- mirR 23 1
-----CAGCAGTCTTACTATGTA----- mirR 18 1
-----GATGGCCTAGAACTCCCT morR 18 2
```

>mmu-mir-1264

```
ATGCCTGGCATATAGCAGGTCCTCAATAAGTATTTGTTGAAAAATAAATGAAGCAACAAATCTTATTTGAGCACCTGTTAT species len reads
ATGCCTGGCATATAGCAG----- morL 18 2
-----AGGTCCTCAATAAGTATTTGT----- mirL 21 35
-----AGGTCCTCAATAAGTATTTGTT----- mirL 22 25
-----AGGTCCTCAATAAGTATTTGTTG----- mirL 23 15
-----AGGTCCTCAATAAGTATTTG----- mirL 20 7
-----AGGTCCTCAATAAGTATTT----- mirL 19 6
-----CAAATCTTATTTGAGCACCTGT--- mirR 22 590
-----ACAAATCTTATTTGAGCACCTGT--- mirR 23 278
-----CAAATCTTATTTGAGCACCTG--- mirR 21 50
-----ACAAATCTTATTTGAGCACCTG--- mirR 22 45
-----ACAAATCTTATTTGAGCACCC----- mirR 20 42
-----CAAATCTTATTTGAGCACCC----- mirR 19 30
-----ACAAATCTTATTTGAGCACCT----- mirR 21 25
-----CAAATCTTATTTGAGCACCTGTT-- mirR 23 19
-----CAAATCTTATTTGAGCACCT----- mirR 20 18
```

```
-----CAAATCTTATTTGAGCAC----- mirR 18 17
-----ACAAATCTTATTTGAGCAC----- mirR 19 12
-----AATCTTATTTGAGCACCTGTTA- mirR 22 8
-----AAATCTTATTTGAGCACCTGT-- mirR 21 8
-----AAATCTTATTTGAGCACCTG--- mirR 20 5
-----AAATCTTATTTGAGCACCTGTTA- mirR 23 4
-----AAATCTTATTTGAGCACCC----- mirR 18 3
-----CAAATCTTATTTGAGCACCTGTTA- mirR 24 2
-----ACAAATCTTATTTGAGCACCTGTTA- mirR 25 2
-----ACAAATCTTATTTGAGCACCTGTT-- mirR 24 1
-----AATCTTATTTGAGCACCTGT-- mirR 20 1
-----AAATCTTATTTGAGCACCT---- mirR 19 1
-----AATCTTATTTGAGCACCTGTT-- mirR 21 1
-----AATCTTATTTGAGCACCTGTTAT mirR 23 1
-----AAATCTTATTTGAGCACCTGTT-- mirR 22 1
-----AACAAATCTTATTTGAGCACCTGTT-- mirR 25 1
-----AACAAATCTTATTTGAGCACCT---- mirR 22 1
```

>mmu-mir-669c

```
TATAGTTGTGTGGATGTGTGATTGTCATATAAATAACATACACACACACAAGTAAACACAAGTGCACAAACAGACACAGGAATGCCATTTCATCGATCCATTGGAATGATAAGTGATTAGAGTTTTAGA spec
-ATAGTTGTGTGGATGTGTGT----- mirL
-ATAGTTGTGTGGATGTGTG----- mirL
-ATAGTTGTGTGGATGTGT----- mirL
-ATAGTTGTGTGGATGTGTGATT----- mirL
-ATAGTTGTGTGGATGTGTAT----- mirL
---AGTTGTGTGGATGTGTGT----- mirL
---AGTTGTGTGGATGTGTAT----- mirL
---GTTGTGTGGATGTGTGT----- mirL
--TAGTTGTGTGGATGTGTGATT----- mirL
---GTTGTGTGGATGTGTAT----- mirL
---GTTGTGTGGATGTGTG----- mirL
--TAGTTGTGTGGATGTGTGTA----- mirL
---AGTTGTGTGGATGTGTGTA----- mirL
--TAGTTGTGTGGATGTGT----- mirL
TATAGTTGTGTGGATGTGTGT----- mirL
--TAGTTGTGTGGATGTGTGT----- mirL
---AGTTGTGTGGATGTGT----- mirL
--TAGTTGTGTGGATGTGT----- mirL
-----AAGTGATTAGAGTTTTA-- mirR
-----GTGATTAGAGTTTTAGA mirR
```

>mmu-mir-375

```
GCGACGAGCCCCTCGCACAAACCGGACCTGAGCGTTTTGTTTCGTTTCGGCTCGCGTGAGG species len reads
GCGACGAGCCCCTCGCACAA----- mirL 20 2
-----TTGTTTCGTTTCGGCTCGCGTGA-- mirR 22 572
-----TTGTTTCGTTTCGGCTCGCGTG--- mirR 21 164
```

```

-----TTGTTTCGTTCCGGCTCGCGTGA-- mirR 21 111
-----TTGTTTCGTTCCGGCTCGC----- mirR 18 109
-----TTGTTTCGTTCCGGCTCGCGTGAG- mirR 23 74
-----TTGTTTCGTTCCGGCTCGCGT---- mirR 20 57
-----TTGTTTCGTTCCGGCTCGCG----- mirR 19 38
-----TTGTTTCGTTCCGGCTCGCGTG-- mirR 20 21
-----TTGTTTCGTTCCGGCTCGCGT---- mirR 19 15
-----TTGTTTCGTTCCGGCTCGCGTGAG- mirR 22 14
-----TTGTTTCGTTCCGGCTCGCGTGAGG mirR 24 7
-----TTTGTTCGTTCCGGCTCGCGTG-- mirR 22 5
-----TTGTTTCGTTCCGGCTCGCG----- mirR 18 3
-----TTTGTTCGTTCCGGCTCGCGTGA-- mirR 23 2
-----TTTGTTCGTTCCGGCTCGC----- mirR 19 2
-----TGTTTCGTTCCGGCTCGCGTGA-- mirR 20 2
-----TGTTTCGTTCCGGCTCGCGT---- mirR 18 2
-----TTTGTTCGTTCCGGCTCGCGT---- mirR 21 1
-----GTTTCGTTCCGGCTCGCGTGA-- mirR 19 1
-----TGTTTCGTTCCGGCTCGCGTGAG- mirR 21 1
-----TGTTTCGTTCCGGCTCGCGTG-- mirR 19 1
-----TGTTTCGTTCCGGCTCGCGTGAGG mirR 22 1
-----GTTTCGTTCCGGCTCGCGTGAGG mirR 21 1
-----TTGTTTCGTTCCGGCTCGCGTGAGG mirR 23 1

```

>mmu-mir-670

```

GTGGTTTGGAGGTGGGCCTGACATCCCTGAGTGTATGTGGTGAACCTGAACTTGCCCTGGGTTTCCTCATATCCATTCCAGGAGTGTACAGTGCCTCTTCGCTCAA species len reads
-----TGGAGGTGGGCCTGACAT----- morL 18 2
GTGGTTTGGAGGTGGGCCTGAC----- morL 22 1
---GTTTGGAGGTGGGCCTGA----- morL 18 1
-----ATCCCTGAGTGTATGTGGTGA----- mirL 21 239
-----ATCCCTGAGTGTATGTGGTG----- mirL 20 161
-----ATCCCTGAGTGTATGTGGTGAAC----- mirL 23 124
-----ATCCCTGAGTGTATGTGGTGAA----- mirL 22 78
-----ATCCCTGAGTGTATGTGGT----- mirL 19 21
-----TCCCTGAGTGTATGTGGT----- mirL 18 3
-----TCCCTGAGTGTATGTGGTG----- mirL 19 2
-----CCTGAGTGTATGTGGTGA----- mirL 18 1
-----TCCCTGAGTGTATGTGGTGAA----- mirL 21 1
-----CCCTGAGTGTATGTGGTGAA----- mirL 20 1
-----TCCCTGAGTGTATGTGGTGA----- mirL 20 1
-----CCTCATATCCATTCCAGGAGTGTC----- mirR 23 198
-----CCTCATATCCATTCCAGGAGTGT----- mirR 22 60
-----TTTCCTCATATCCATTCCAGGAGT----- mirR 23 30
-----TTTCCTCATATCCATTCCAGG----- mirR 20 29
-----TTTCCTCATATCCATTCCAGGAGT----- mirR 22 27
-----CCTCATATCCATTCCAGGAGTG----- mirR 21 25
-----TTTCCTCATATCCATTCCAGGAGTGTC----- mirR 25 24

```

```

-----TTCCTCATATCCATTCCAGGAGTG----- mirR 23 18
-----TTTCTCATATCCATTCCAGGAGTG----- mirR 24 18
-----CCTCATATCCATTCCAGGAG----- mirR 19 13
-----TTTCTCATATCCATTCCAG----- mirR 19 13
-----TTTCTCATATCCATTCCAGGAGTGT----- mirR 25 12
-----TTCCTCATATCCATTCCAGGAG----- mirR 21 12
-----TTTCTCATATCCATTCCAGGAG----- mirR 22 12
-----CCTCATATCCATTCCAGGAGT----- mirR 20 9
-----TCCTCATATCCATTCCAGGAGTGT----- mirR 24 8
-----TTCCTCATATCCATTCCAGG----- mirR 19 8
-----TTCCTCATATCCATTCCAGGA----- mirR 20 7
-----TTTCTCATATCCATTCCAG----- mirR 18 7
-----TTTCTCATATCCATTCCAGGAGTGT----- mirR 24 4
-----TCCTCATATCCATTCCAGGA----- mirR 19 2
-----TCCTCATATCCATTCCAGGAGTGT----- mirR 23 2
-----TCCTCATATCCATTCCAGGAGT----- mirR 21 2
-----CCTCATATCCATTCCAGGA----- mirR 18 2
-----CCTCATATCCATTCCAGGAGTGTCA----- mirR 24 2
-----TCCTCATATCCATTCCAGGAGTG----- mirR 22 2
-----TCAGCTGCCTCTTCGCTCA----- morR 19 7
-----TCAGCTGCCTCTTCGCTC----- morR 18 2
-----TCAGCTGCCTCTTCGCTCAA----- morR 20 1

```

>mmu-mir-721

```

GGGGGAAAAAAGTACCTGGGATGTTCTGAGAATTTCAATTTTCTTGTATTGCCACTCCTGCTTGG species len reads
-GGGGAAAAAAGTACCTGG----- mirL 18 2
GGGGGAAAAAAGTACCTG----- mirL 18 1
-----AGAATTTCAATTTTCTTG----- mirR 18 375
-----AGAATTTCAATTTTCTTGT----- mirR 19 348
-----AGAATTTCAATTTTCTTGTT----- mirR 20 138
-----GAATTTCAATTTTCTTGT----- mirR 18 83
-----AGAATTTCAATTTTCTTGTTA----- mirR 21 64
-----GAATTTCAATTTTCTTGTTA----- mirR 20 57
-----GAATTTCAATTTTCTTGTT----- mirR 19 55
-----AGAATTTCAATTTTCTTGTTAT----- mirR 22 10
-----GAATTTCAATTTTCTTGTTAT----- mirR 21 9
-----AATTTCAATTTTCTTGTT----- mirR 18 4
-----AATTTCAATTTTCTTGTTAT----- mirR 20 4
-----AATTTCAATTTTCTTGTTA----- mirR 19 2
-----GAGAATTTCAATTTTCTT----- mirR 18 1
-----ATTGCCACTCCTGCTTGG----- morR 18 1

```

>mmu-mir-205

```

TCCTTCATTCCACCGGAGTCTGTCTTATGCCAACAGATTTTCAGTGGAGTGAAGCTCAGGAGGCATGGAGCTGCC species len reads
TCCTTCATTCCACCGGAGTCT----- mirL 21 347
TCCTTCATTCCACCGGAGTCTG----- mirL 22 289

```

```

TCCTTCATTCCACCGGAGTCTGT----- mirL 23 160
TCCTTCATTCCACCGGAGTCTGTC----- mirL 24 142
TCCTTCATTCCACCGGAGTC----- mirL 20 122
-CCTTCATTCCACCGGAGTCT----- mirL 20 20
-CCTTCATTCCACCGGAGTCTG----- mirL 21 19
-CCTTCATTCCACCGGAGTCTGTC----- mirL 23 9
-CCTTCATTCCACCGGAGTCTGT----- mirL 22 5
-CCTTCATTCCACCGGAGTC----- mirL 19 4
-----TCTGTCTTATGCCAACCA----- loop 18 1
-----TTCAGTGGAGTGAAGCTCAG----- mirR 20 1
-----AGTGGAGTGAAGCTCAG----- mirR 18 1
-----AGGAGGCATGGAGCTGCC morR 18 1

```

>mmu-mir-344c

```

TCTGCAAGGGTTTTTTTCAGTCAGGCTGCTGGCTAGAGTACAGCTATCAGCTGGTACCTGATCTAGTCAAAGCCTGACAGTAAACTGCTCCAGAGAGGA species len reads
TCTGCAAGGGTTTTTTTC----- morL 18 1
-----AGTCAGGCTGCTGGCTAGAGTAC----- mirL 23 4
-----TCAGGCTGCTGGCTAGAGTAC----- mirL 21 3
-----TCAGTCAGGCTGCTGGCTAGA----- mirL 21 1
-----AGTCAGGCTGCTGGCTAGAG----- mirL 20 1
-----TCAGGCTGCTGGCTAGAGTACAGC----- mirL 24 1
-----AGTCAGGCTGCTGGCTAGA----- mirL 19 1
-----CAGGCTGCTGGCTAGAGTAC----- mirL 20 1
-----GCTATCAGCTGGTACCTGA----- loop 19 1
-----TGATCTAGTCAAAGCCTGACAGT----- mirR 23 376
-----GATCTAGTCAAAGCCTGACAGT----- mirR 22 174
-----TGATCTAGTCAAAGCCTGAC----- mirR 20 116
-----TGATCTAGTCAAAGCCTGA----- mirR 19 53
-----TGATCTAGTCAAAGCCTGACA----- mirR 21 51
-----GATCTAGTCAAAGCCTGAC----- mirR 19 47
-----TGATCTAGTCAAAGCCTGACAGTA----- mirR 24 30
-----GATCTAGTCAAAGCCTGACA----- mirR 20 28
-----TGATCTAGTCAAAGCCTGACAG----- mirR 22 25
-----GATCTAGTCAAAGCCTGACAGTA----- mirR 23 21
-----TGATCTAGTCAAAGCCTG----- mirR 18 11
-----GATCTAGTCAAAGCCTGA----- mirR 18 6
-----GATCTAGTCAAAGCCTGACAG----- mirR 21 4
-----GATCTAGTCAAAGCCTGACAGTAA----- mirR 24 3
-----ACCTGATCTAGTCAAAGCC----- mirR 19 1
-----CCTGATCTAGTCAAAGCC----- mirR 18 1
-----TAAACTGCTCCAGAGAGGA morR 19 10

```

>mmu-mir-879

```

AGACAAGTTTCTAGGTCCAGAGGCTTATAGCTCTAAGCCTTGGATGAAAGAGGCTTATGGCTTCAAGCTTTTCGGAGCTGGAGACTTACTGCTCTT species len reads
AGACAAGTTTCTAGGTCC----- morL 18 1
-----AGAGGCTTATAGCTCTAAGC----- mirL 20 44

```

```
-----AGAGGCTTATAGCTCTAAGCC----- mirL 21 43
-----AGAGGCTTATAGCTCTAA----- mirL 18 21
-----AGAGGCTTATAGCTCTAAG----- mirL 19 21
-----AGAGGCTTATAGCTCTAAGCCT----- mirL 22 15
-----CAGAGGCTTATAGCTCTAAGCCTTG----- mirL 25 1
-----CCAGAGGCTTATAGCTCT----- mirL 18 1
-----CTTATGGCTTCAAGCTTTCGGA----- mirR 22 183
-----CTTATGGCTTCAAGCTTTCGG----- mirR 21 157
-----CTTATGGCTTCAAGCTTTCGGAGC----- mirR 24 140
-----CTTATGGCTTCAAGCTTTC----- mirR 19 82
-----GCTTATGGCTTCAAGCTTTCGG----- mirR 22 50
-----CTTATGGCTTCAAGCTTTCGGAG----- mirR 23 35
-----GCTTATGGCTTCAAGCTTTCGGA----- mirR 23 28
-----CTTATGGCTTCAAGCTTTCG----- mirR 20 19
-----CTTATGGCTTCAAGCTTTC----- mirR 18 18
-----GCTTATGGCTTCAAGCTTTCG----- mirR 21 7
-----GCTTATGGCTTCAAGCTTTCGGAG----- mirR 24 4
-----GCTTATGGCTTCAAGCTTTC----- mirR 20 3
-----GCTTATGGCTTCAAGCTTTC----- mirR 19 3
-----GCTTATGGCTTCAAGCTT----- mirR 18 2
-----TTATGGCTTCAAGCTTTCGG----- mirR 20 1
-----TTATGGCTTCAAGCTTTCG----- mirR 19 1
-----TTATGGCTTCAAGCTTTC----- mirR 18 1
-----TGGAGACTTACTGCTCTT morR 18 1
```

>mmu-mir-1247

```
CAGCCCCGGCCGCGGGCGCACCCGTCCCCTCGTCCCCTGGACGTTGCTCTCTGCCCCGGGAACGTCGAGACTGGAGCGCCCGAAGTGGAGCCACCTTCGCGAACTCGGAGCGCGGGCCCGGACTCAACCGGGAGGC sp
--GCCCGGCGCCGGGGCGC----- m
--GCCCGGCGCCGGGGCGCA----- m
---CCCCGGCCGCGGGCGCACC----- m
--GCCCGGCGCCGGGGCGCACC----- m
-AGCCCCGGCCGCGGGGGCGC----- m
---CCCCGGCCGCGGGCGCAC----- m
CAGCCCCGGCCGCGGGGC----- m
-----ACCCGTCCCCTCGTCCCCTGGAC----- m
-----ACCCGTCCCCTCGTCCCC----- m
-----ACCCGTCCCCTCGTCCCCTGGGA----- m
-----ACCCGTCCCCTCGTCCC----- m
-----ACCCGTCCCCTCGTCCCCTGG----- m
-----CACCCGTCCCCTCGTCCC----- m
-----CACCCGTCCCCTCGTCCCC----- m
-----CACCCGTCCCCTCGTCCC----- m
-----CCCCTCCCCTCGTCCCCTGG----- m
-----CCCCTCCCCTCGTCCCCTGGGA----- m
-----CGGAGCGCGGGCGCCCGA----- m
-----TCGGAGCGCGGGCGCCCGA----- m
```

```
-----GAGCGCGGCGGCCGACT----- m
-----AGCGCGGCGGCCGACTC----- m
-----GGAGCGCGGCGGCCGACT----- m
-----CGGAGCGCGGCGGCCGACT----- m
-----GAGCGCGGCGGCCGACTC----- m
-----GACTCAACCGCGGAGGC mo
```

>mmu-mir-503

```
CCATCCCCTCAGTCGTGCCCTAGCAGCGGGAACAGTACTGCAGTGAGTGTGGTGCCCTGGAGTATTGTTTCCACTGCCTGGG species len reads
--ATCCCCTCAGTCGTGCC--TAGCAGCGGGAACAGTACTGCAGTGAGTGTGGTGCCCTGGAGTATTGTTTCCACTGCCTGGG morL 18 28
--ATCCCCTCAGTCGTGCCCT--TAGCAGCGGGAACAGTACTGCAGTGAGTGTGGTGCCCTGGAGTATTGTTTCCACTGCCTGGG morL 20 5
--ATCCCCTCAGTCGTGCC--TAGCAGCGGGAACAGTACTGCAGTGAGTGTGGTGCCCTGGAGTATTGTTTCCACTGCCTGGG morL 19 4
---CCCCTCAGTCGTGCCCT--TAGCAGCGGGAACAGTACTGCAGTGAGTGTGGTGCCCTGGAGTATTGTTTCCACTGCCTGGG morL 18 2
---TCCCCTCAGTCGTGCC--TAGCAGCGGGAACAGTACTGCAGTGAGTGTGGTGCCCTGGAGTATTGTTTCCACTGCCTGGG morL 18 1
--ATCCCCTCAGTCGTGCCCTA--TAGCAGCGGGAACAGTACTGCAGTGAGTGTGGTGCCCTGGAGTATTGTTTCCACTGCCTGGG morL 21 1
CCATCCCCTCAGTCGTGCCCTAGCAGCGGGAACAGTACTGCAGTGAGTGTGGTGCCCTGGAGTATTGTTTCCACTGCCTGGG morL 18 1
-----TAGCAGCGGGAACAGTACTGCA-----TAGCAGCGGGAACAGTACTGCAGTGAGTGTGGTGCCCTGGAGTATTGTTTCCACTGCCTGGG mirL 22 145
-----TAGCAGCGGGAACAGTACTGCA-----TAGCAGCGGGAACAGTACTGCAGTGAGTGTGGTGCCCTGGAGTATTGTTTCCACTGCCTGGG mirL 18 107
-----TAGCAGCGGGAACAGTACTGCAG-----TAGCAGCGGGAACAGTACTGCAGTGAGTGTGGTGCCCTGGAGTATTGTTTCCACTGCCTGGG mirL 23 104
-----TAGCAGCGGGAACAGTACTGC-----TAGCAGCGGGAACAGTACTGCAGTGAGTGTGGTGCCCTGGAGTATTGTTTCCACTGCCTGGG mirL 21 99
-----TAGCAGCGGGAACAGTACTGC-----TAGCAGCGGGAACAGTACTGCAGTGAGTGTGGTGCCCTGGAGTATTGTTTCCACTGCCTGGG mirL 20 45
-----AGCAGCGGGAACAGTACTGCAG-----AGCAGCGGGAACAGTACTGCAGTGAGTGTGGTGCCCTGGAGTATTGTTTCCACTGCCTGGG mirL 22 25
-----AGCAGCGGGAACAGTACTGC-----AGCAGCGGGAACAGTACTGCAGTGAGTGTGGTGCCCTGGAGTATTGTTTCCACTGCCTGGG mirL 20 7
-----AGCAGCGGGAACAGTACTGCAGT-----AGCAGCGGGAACAGTACTGCAGTGAGTGTGGTGCCCTGGAGTATTGTTTCCACTGCCTGGG mirL 23 5
-----AGCAGCGGGAACAGTACTGC-----AGCAGCGGGAACAGTACTGCAGTGAGTGTGGTGCCCTGGAGTATTGTTTCCACTGCCTGGG mirL 19 3
-----AGCAGCGGGAACAGTACTGCA-----AGCAGCGGGAACAGTACTGCAGTGAGTGTGGTGCCCTGGAGTATTGTTTCCACTGCCTGGG mirL 21 2
-----CTAGCAGCGGGAACAGTACTGC-----AGCAGCGGGAACAGTACTGCAGTGAGTGTGGTGCCCTGGAGTATTGTTTCCACTGCCTGGG mirL 22 1
-----CAGTGAGTGTGGTGCC-----CAGTGAGTGTGGTGCCCTGGAGTATTGTTTCCACTGCCTGGG loop 18 1
-----GTGAGTGTGGTGCCCTG-----CAGTGAGTGTGGTGCCCTGGAGTATTGTTTCCACTGCCTGGG loop 19 1
-----GGAGTATTGTTTCCACTGCCTGG-----GGAGTATTGTTTCCACTGCCTGGAGTATTGTTTCCACTGCCTGGG mirR 23 70
-----GGAGTATTGTTTCCACTGCCTG-----GGAGTATTGTTTCCACTGCCTGGAGTATTGTTTCCACTGCCTGGG mirR 22 70
-----GAGTATTGTTTCCACTGCCTGG-----GGAGTATTGTTTCCACTGCCTGGAGTATTGTTTCCACTGCCTGGG mirR 22 49
-----GGAGTATTGTTTCCACTGC-----GGAGTATTGTTTCCACTGCCTGGAGTATTGTTTCCACTGCCTGGG mirR 19 21
-----GGAGTATTGTTTCCACTGCCT-----GGAGTATTGTTTCCACTGCCTGGAGTATTGTTTCCACTGCCTGGG mirR 21 15
-----GAGTATTGTTTCCACTGCC-----GGAGTATTGTTTCCACTGCCTGGAGTATTGTTTCCACTGCCTGGG mirR 19 12
-----GAGTATTGTTTCCACTGCCT-----GGAGTATTGTTTCCACTGCCTGGAGTATTGTTTCCACTGCCTGGG mirR 20 9
-----GAGTATTGTTTCCACTGC-----GGAGTATTGTTTCCACTGCCTGGAGTATTGTTTCCACTGCCTGGG mirR 18 6
-----GAGTATTGTTTCCACTGCCTGGG-----GGAGTATTGTTTCCACTGCCTGGAGTATTGTTTCCACTGCCTGGG mirR 23 5
-----GGAGTATTGTTTCCACTGCC-----GGAGTATTGTTTCCACTGCCTGGAGTATTGTTTCCACTGCCTGGG mirR 20 4
-----GGAGTATTGTTTCCACTGC-----GGAGTATTGTTTCCACTGCCTGGAGTATTGTTTCCACTGCCTGGG mirR 18 4
-----GAGTATTGTTTCCACTGCCTG-----GGAGTATTGTTTCCACTGCCTGGAGTATTGTTTCCACTGCCTGGG mirR 21 2
-----GGAGTATTGTTTCCACTGCCTGGG-----GGAGTATTGTTTCCACTGCCTGGAGTATTGTTTCCACTGCCTGGG mirR 24 2
-----CTGGAGTATTGTTTCCACTGCCTGG-----GGAGTATTGTTTCCACTGCCTGGAGTATTGTTTCCACTGCCTGGG mirR 25 1
-----GTATTGTTTCCACTGCCTGG-----CTGGAGTATTGTTTCCACTGCCTGGAGTATTGTTTCCACTGCCTGGG mirR 20 1
```

>mmu-mir-3475



```

ACCAAGACTATGCTCTGCTCCCCAAATCATGTACCCCCACAGAGGGTCCAGATGGTTCTTAGTTCTTCTGGAGGCACATGGTTTGAAGAGC species len reads
ACCAAGACTATGCTCTGCTCCC-----morL 22 1
-----CAAATCATGTACCCCCACAGA-----mirL 21 2
-----CCCAAATCATGTACCCCCACAG-----mirL 22 1
-----CAAATCATGTACCCCCACA-----mirL 19 1
-----CCCAAATCATGTACCCCCACAGA-----mirL 23 1
-----AAATCATGTACCCCCACAGA-----mirL 20 1
-----CAAATCATGTACCCCCACAGAGGG-----mirL 24 1
-----TCCAGATGGTTCTTAGTTCTT-----loop 21 1
-----TCTGGAGGCACATGGTTTGA-----mirR 20 245
-----TCTGGAGGCACATGGTTTG-----mirR 19 234
-----TTCTGGAGGCACATGGTTTG-----mirR 20 81
-----TCTGGAGGCACATGGTTTGAAG---mirR 22 59
-----TTCTGGAGGCACATGGTTTGA-----mirR 21 47
-----TCTGGAGGCACATGGTTTGA-----mirR 21 37
-----CTGGAGGCACATGGTTTGA-----mirR 19 21
-----TCTGGAGGCACATGGTTT-----mirR 18 14
-----TCTGGAGGCACATGGTTTGAAGA--mirR 23 13
-----TTCTGGAGGCACATGGTTT-----mirR 19 12
-----CTGGAGGCACATGGTTTG-----mirR 18 12
-----CTGGAGGCACATGGTTTGAAG---mirR 21 10
-----TCTGGAGGCACATGGTTTGAAGAGC mirR 25 6
-----CTTCTGGAGGCACATGGTTTGA-----mirR 22 5
-----CTTCTGGAGGCACATGGTTTG-----mirR 21 5
-----TTCTGGAGGCACATGGTTTGA-----mirR 22 4
-----TTCTGGAGGCACATGGTTTGAAG---mirR 23 4
-----TTCTGGAGGCACATGGTT-----mirR 18 4
-----CTGGAGGCACATGGTTTGA-----mirR 20 3
-----TTCTGGAGGCACATGGTTTGAAGAG- mirR 25 3
-----CTTCTGGAGGCACATGGTTTGAAG---mirR 24 1
-----CTGGAGGCACATGGTTTGAAGA--mirR 22 1
-----CTGGAGGCACATGGTTTGAAGAG- mirR 23 1
-----CTTCTGGAGGCACATGGTTTGA-----mirR 23 1

```

>mmu-mir-488

```

GTGAGAATCCTCTCTCCAGATAATAGCACTCTCAAACAAGTTTCCATGTTGTTTGAAGGCTGTTTCTTGGTCAGA species len reads
GTGAGAATCCTCTCTCCC-----morL 18 1
-----CCCAGATAATAGCACTCTCA-----mirL 20 116
-----CCCAGATAATAGCACTCTC-----mirL 19 41
-----CCCAGATAATAGCACTCTCAA-----mirL 21 19
-----CCCAGATAATAGCACTCT-----mirL 18 19
-----CCCAGATAATAGCACTCTCAAAC---mirL 23 11
-----TCTCCAGATAATAGCACTCTC-----mirL 22 1
-----AAACAAGTTTCCATGTTG-----loop 18 1
-----TTGAAAGGCTGTTTCTTGGT---mirR 20 249
-----TTGAAAGGCTGTTTCTTGGTCA--mirR 22 126

```

```

-----TTGAAAGGCTGTTTCTTGGTC--- mirR 21 59
-----TGAAAGGCTGTTTCTTGGT---- mirR 19 42
-----TTGAAAGGCTGTTTCTTGG---- mirR 19 30
-----TGAAAGGCTGTTTCTTGGTCA-- mirR 21 20
-----TTTGAAGGCTGTTTCTTGGT---- mirR 21 16
-----TTTGAAGGCTGTTTCTTGGTC--- mirR 22 15
-----TTGAAAGGCTGTTTCTTGGTCAG- mirR 23 12
-----TTTGAAGGCTGTTTCTT--- mirR 18 9
-----TGAAAGGCTGTTTCTTGGTC--- mirR 20 8
-----TTTGAAGGCTGTTTCTTGG---- mirR 20 5
-----TGAAAGGCTGTTTCTTGG---- mirR 18 5
-----TTGAAAGGCTGTTTCTTGG---- mirR 18 4
-----TTTGAAGGCTGTTTCTTGG---- mirR 19 4
-----TTGAAAGGCTGTTTCTTGGTCAGA mirR 24 2
-----TGAAAGGCTGTTTCTTGGTCAG- mirR 22 1
-----GAAAGGCTGTTTCTTGGTCA-- mirR 20 1
-----TTTGAAGGCTGTTTCTTGGTCA-- mirR 23 1

```

>mmu-mir-450a-1

```

TTTTGCGATGTGTTCCCTAATATGTGCTATAATTATATTTGGGAACATTTGCATAAATAGCTTTGTGTC species len reads
-TTTTGGCGATGTGTTCCCTAATAT----- mirL 22 264
-TTTTGGCGATGTGTTCCCTAAT----- mirL 20 184
-TTTTGGCGATGTGTTCCCTAATA----- mirL 21 123
-TTTTGGCGATGTGTTCCCTAA----- mirL 19 63
--TTTGGCGATGTGTTCCCTAATAT----- mirL 21 39
--TTTGGCGATGTGTTCCCTAAT----- mirL 19 25
--TTTGGCGATGTGTTCCCTAATA----- mirL 20 21
-TTTTGGCGATGTGTTCCCTAATATG----- mirL 23 15
--TTTGGCGATGTGTTCCCTAATATG----- mirL 22 4
--TTTGGCGATGTGTTCCCTAA----- mirL 18 3
TTTTTGGCGATGTGTTCCCTAA----- mirL 20 1
-----CATAAATAGCTTTGTGTC- mirR 18 43
-----GCATAAATAGCTTTGTGTC- mirR 19 1
-----CATAAATAGCTTTGTGTC species len reads

```

>mmu-mir-450a-2

```

CAAGATGCTGAACATTTTTTGGCGATGTGTTCCCTAATATGTACTATGAGTATATTTGGGGATGCTTTGCATTCATGGTTCTGCATCCATCATATGGACAGTCACCTCCAAGCTGTAGCACCACCAGT species len r
CAAGATGCTGAACATTTT----- morL 18 1
-----TTTTGCGATGTGTTCCCTAATAT----- mirL 22 264
-----TTTTGCGATGTGTTCCCTAAT----- mirL 20 184
-----TTTTGCGATGTGTTCCCTAATA----- mirL 21 123
-----TTTTGCGATGTGTTCCCTAA----- mirL 19 63
-----TTTTGCGATGTGTTCCCTAATAT----- mirL 21 39
-----TTTTGCGATGTGTTCCCTAAT----- mirL 19 25
-----TTTTGCGATGTGTTCCCTAATA----- mirL 20 21
-----TTTTGCGATGTGTTCCCTAATATG----- mirL 23 15

```

```

-----TTTGGCGATGTGTTCCCTAATATG----- mirL 22 4
-----TTTGGCGATGTGTTCCCTAA----- mirL 18 3
-----TTTTTGGCGATGTGTTCCCTAA----- mirL 20 1
-----CAAGCTGTAGCACCACCA-- mirR 18 2
-----AAGCTGTAGCACCACCAGT mirR 19 1
-----AAGCTGTAGCACCACCAG- mirR 18 1

```

>mmu-mir-28

```

GAGGTGGTCCCTACCTTCAAGGAGCTCACAGTCTATTGAGTTGCCTTTCTGATTCTCCCACTAGATTGTGAGCTGCTGGAGGGC species len reads
GAGGTGGTCCCTACCTT----- morL 18 1
-----AAGGAGCTCACAGTCTATTGA----- mirL 21 132
-----AAGGAGCTCACAGTCTATTG----- mirL 20 88
-----AAGGAGCTCACAGTCTATTGAG----- mirL 22 44
-----AAGGAGCTCACAGTCTAT----- mirL 18 36
-----AAGGAGCTCACAGTCTATT----- mirL 19 28
-----TCAAGGAGCTCACAGTCTATTG----- mirL 22 17
-----TCAAGGAGCTCACAGTCTAT----- mirL 20 8
-----CAAGGAGCTCACAGTCTAT----- mirL 19 7
-----CAAGGAGCTCACAGTCTATTG----- mirL 21 6
-----TCAAGGAGCTCACAGTCTA----- mirL 19 5
-----CAAGGAGCTCACAGTCTATT----- mirL 20 2
-----TCAAGGAGCTCACAGTCTATTGAG----- mirL 24 2
-----TCAAGGAGCTCACAGTCTATTGA----- mirL 23 2
-----CAAGGAGCTCACAGTCTATTGA----- mirL 22 2
-----AGGAGCTCACAGTCTATTGA----- mirL 20 1
-----CACTAGATTGTGAGCTGCTGGA---- mirR 22 142
-----CACTAGATTGTGAGCTGCTGG---- mirR 21 43
-----CACTAGATTGTGAGCTGCTGC---- mirR 18 35
-----CACTAGATTGTGAGCTGCTGGAG--- mirR 23 30
-----ACTAGATTGTGAGCTGCTGGA---- mirR 21 16
-----CACTAGATTGTGAGCTGCTG----- mirR 20 14
-----ACTAGATTGTGAGCTGCTGGAG--- mirR 22 13
-----CACTAGATTGTGAGCTGCTGGAGGG- mirR 25 8
-----ACTAGATTGTGAGCTGCTGG----- mirR 20 7
-----CACTAGATTGTGAGCTGCTG----- mirR 19 6
-----ACTAGATTGTGAGCTGCTG----- mirR 19 4
-----CCACTAGATTGTGAGCTG----- mirR 18 4
-----CCACTAGATTGTGAGCTGC----- mirR 19 3
-----ACTAGATTGTGAGCTGCTGGAGG-- mirR 23 2
-----TCCCACTAGATTGTGAGC----- mirR 18 1
-----CCACTAGATTGTGAGCTGCT----- mirR 20 1
-----CCACTAGATTGTGAGCTGCTGGA---- mirR 23 1
-----CTAGATTGTGAGCTGCTGGAG--- mirR 21 1
-----TAGATTGTGAGCTGCTGGA---- mirR 19 1
-----CTAGATTGTGAGCTGCTGGAGGGC mirR 24 1
-----CTAGATTGTGAGCTGCTGGAGG-- mirR 22 1

```

```

-----ACTAGATTGTGAGCTGCT----- mirR 18 1
-----CCACTAGATTGTGAGCTGCTGG----- mirR 22 1

>mmu-mir-194-1
AAACTGATGGAGTCATCGGGTGTAACAGCAACTCCATGTGGACTGTGCTCGGATTCCAGTGGAGCTGCTGTTACTTCTGATGGCC species len reads
-----GATGGAGTCATCGGGTGT----- morL 18 2
AAACTGATGGAGTCATCGGG----- morL 20 1
-----TGTAACAGCAACTCCATGTGG----- mirL 21 297
-----TGTAACAGCAACTCCATGTGGAC----- mirL 23 126
-----TGTAACAGCAACTCCATGTG----- mirL 20 74
-----TGTAACAGCAACTCCATGTGGA----- mirL 22 69
-----TGTAACAGCAACTCCATGT----- mirL 19 51
-----GTAACAGCAACTCCATGTGG----- mirL 20 24
-----GTAACAGCAACTCCATGT----- mirL 18 8
-----GTAACAGCAACTCCATGTGGA----- mirL 21 7
-----GTAACAGCAACTCCATGTG----- mirL 19 5
-----GTAACAGCAACTCCATGTGGAC----- mirL 22 3
-----AACAGCAACTCCATGTGGAC----- mirL 20 1
-----CTGCTGTTACTTCTGATGGCC mirR 21 1
-----GAGCTGCTGTTACTTCTG----- mirR 18 1

>mmu-mir-493
ACTCTGGCCGCCAGGGCCTTGTACATGGTAGGCTTTTCATTCATTTTTTGCACATTCGGTGAAGGTCTACTGTGTGCCAGGCC species len reads
ACTCTGGCCGCCAGGGCC----- morL 18 1
ACTCTGGCCGCCAGGGCCT----- morL 19 1
-----TTGTACATGGTAGGCTTTTCAT----- mirL 21 205
-----TTGTACATGGTAGGCTTTTCATTC----- mirL 23 146
-----TTGTACATGGTAGGCTTTTCA----- mirL 20 83
-----TTGTACATGGTAGGCTTTTC----- mirL 19 76
-----TTGTACATGGTAGGCTTTTCATT----- mirL 22 75
-----TGTACATGGTAGGCTTTTCAT----- mirL 20 20
-----TGTACATGGTAGGCTTTTCATT----- mirL 21 11
-----TGTACATGGTAGGCTTTTC----- mirL 18 5
-----TGTACATGGTAGGCTTTTCATTC----- mirL 22 4
-----TGTACATGGTAGGCTTTTCA----- mirL 19 4
-----TACATGGTAGGCTTTTCATTCA----- mirL 21 1
-----TGAAGGTCCTACTGTGTGCCA----- mirR 21 9
-----TGAAGGTCCTACTGTGTGC----- mirR 19 7
-----TGAAGGTCCTACTGTGTGCCAG----- mirR 22 7
-----TGAAGGTCCTACTGTGTGCCAGG----- mirR 23 4
-----TGAAGGTCCTACTGTGTGCC----- mirR 20 4
-----TGAAGGTCCTACTGTGTGCCAGGCC mirR 25 2
-----GAAGGTCCTACTGTGTGCCAG----- mirR 21 1
-----TGAAGGTCCTACTGTGTGCCAGGC- mirR 24 1
-----GAAGGTCCTACTGTGTGCC----- mirR 19 1
-----AGGTCCTACTGTGTGCCAG----- mirR 19 1

```

-----GAAGGTCCTACTGTGTGC----- mirR 18 1

>mmu-mir-20b

|                                                               | species | len | reads |
|---------------------------------------------------------------|---------|-----|-------|
| CAAAGTGCTCATAGTGCAGGTAGTTTTTATACCCTACTGTCAGTGTGAGCACTTCTAGTAC | mirL 22 | 217 |       |
| CAAAGTGCTCATAGTGCAGGTA-----                                   | mirL 23 | 211 |       |
| CAAAGTGCTCATAGTGCAGGTAG-----                                  | mirL 21 | 46  |       |
| CAAAGTGCTCATAGTGCAGGTAGT-----                                 | mirL 24 | 43  |       |
| CAAAGTGCTCATAGTGCAG-----                                      | mirL 19 | 28  |       |
| -AAAGTGCTCATAGTGCAGGT-----                                    | mirL 20 | 1   |       |
| ---AGTGCTCATAGTGCAGGTA-----                                   | mirL 19 | 1   |       |
| --AAGTGCTCATAGTGCAGGTAG-----                                  | mirL 21 | 1   |       |
| -----ACTGTCAGTGTGAGCACTTCTAGT--                               | mirR 23 | 19  |       |
| -----ACTGTCAGTGTGAGCACTTCT-----                               | mirR 20 | 13  |       |
| -----ACTGTCAGTGTGAGCACTTCTAG--                                | mirR 22 | 12  |       |
| -----ACTGTCAGTGTGAGCACTTC-----                                | mirR 19 | 11  |       |
| -----ACTGTCAGTGTGAGCACTTCTA---                                | mirR 21 | 9   |       |
| -----ACTGTCAGTGTGAGCACTTCTAGTA-                               | mirR 24 | 5   |       |
| -----TGCAGTGTGAGCACTTCTAG--                                   | mirR 20 | 1   |       |
| -----ACTGTCAGTGTGAGCACTTCTAGTAC                               | mirR 25 | 1   |       |
| -----TACTGTCAGTGTGAGCACT-----                                 | mirR 18 | 1   |       |
| -----TGCAGTGTGAGCACTTCT-----                                  | mirR 18 | 1   |       |
| -----TGCAGTGTGAGCACTTCTAGTA-                                  | mirR 22 | 1   |       |

>mmu-mir-1274a

|                                                                                                                         | species | len | reads |
|-------------------------------------------------------------------------------------------------------------------------|---------|-----|-------|
| AGGTCCCTGTTTCAGGCGCCAAACTGTTGCTGGCCGTCACGGCACGCAAGGAACAGGTACAGCTGAGATGGCAGGCTCAAGCTAAAAGAAAAGGAAGTACAGGGACGGAAGAAAGAACG | mirL 18 | 227 |       |
| --GTCCCTGTTTCAGGCGCCA-----                                                                                              | mirL 19 | 151 |       |
| ---TCCCTGTTTCAGGCGCCAAA-----                                                                                            | mirL 19 | 108 |       |
| ---TCCCTGTTTCAGGCGCCAA-----                                                                                             | mirL 18 | 95  |       |
| ---GTCCCTGTTTCAGGCGCCAAA-----                                                                                           | mirL 20 | 14  |       |
| ---TCCCTGTTTCAGGCGCCAAAC-----                                                                                           | mirL 20 | 5   |       |
| ---CCCTGTTTCAGGCGCCAAA-----                                                                                             | mirL 18 | 4   |       |
| --GTCCCTGTTTCAGGCGCCAAAC-----                                                                                           | mirL 21 | 2   |       |
| -GGTCCCTGTTTCAGGCGCC-----                                                                                               | mirL 18 | 1   |       |
| ---TCCCTGTTTCAGGCGCCAAACT-----                                                                                          | mirL 21 | 1   |       |
| ---CCCTGTTTCAGGCGCCAAACT-----                                                                                           | mirL 20 | 1   |       |
| ---TCCCTGTTTCAGGCGCCAAACTG-----                                                                                         | mirL 22 | 1   |       |
| AGGTCCCTGTTTCAGGCGC-----                                                                                                | mirL 18 | 1   |       |
| -----CTAGAGGGACGGAAGAAA-----                                                                                            | mirR 19 | 2   |       |
| -----CTAGAGGGACGGAAGAAA-----                                                                                            | mirR 18 | 1   |       |
| -----AGAGGGACGGAAGAAAGAACG                                                                                              | mirR 21 | 1   |       |

>mmu-mir-3083

|                                                                                 | species | len | reads |
|---------------------------------------------------------------------------------|---------|-----|-------|
| ATATATATATATATAAAGTAAAGGCTGGGAATATTCAGAGATATATATGTATATCTCCGAAACATTCAGCCTTTACTAA |         |     |       |
| --ATATATATATATAAAGTA-----                                                       | morL 18 | 4   |       |

```

ATATATATATATATAAAGTA----- morL 20 2
---TATATATATATAAAGTAA----- morL 18 1
-TATATATATATATAAAGTA----- morL 19 1
---ATATATATATAAAGTAAA----- morL 18 1
ATATATATATATATAAAG----- morL 18 1
-----AGGCTGGGAATATTTTCAGAGAT----- mirL 22 10
-----AGGCTGGGAATATTTTCAGA----- mirL 19 8
-----AAGGCTGGGAATATTTTCAGAGA----- mirL 22 6
-----AGGCTGGGAATATTTTCAGAGA----- mirL 21 5
-----AGGCTGGGAATATTTTCAGAGATA----- mirL 23 4
-----AAGGCTGGGAATATTTTCAGA----- mirL 20 4
-----AAGGCTGGGAATATTTTCAGAGAT----- mirL 23 3
-----AAAGGCTGGGAATATTTTCAGAG----- mirL 22 2
-----AAAGGCTGGGAATATTTTCAGAGA----- mirL 23 1
-----AGGCTGGGAATATTTTCAGAG----- mirL 20 1
-----AAAGGCTGGGAATATTTCA----- mirL 19 1
-----GCTGGGAATATTTTCAGAG----- mirL 18 1
-----AAGGCTGGGAATATTTTCAGAG----- mirL 21 1
-----AAGGCTGGGAATATTTTCAGAGATAT----- mirL 25 1
-----ATATATATGTATATCTCC----- loop 18 1
-----TCCGAAACATTTCCAGCCTTTAC--- mirR 23 80
-----CTCCGAAACATTTCCAGCCTTT----- mirR 22 54
-----TCTCCGAAACATTTCCAGCCTTT----- mirR 23 49
-----TCCGAAACATTTCCAGCCTTT----- mirR 21 48
-----TCTCCGAAACATTTCCAGCC----- mirR 20 42
-----TCTCCGAAACATTTCCAGCCTTTAC--- mirR 25 35
-----TCTCCGAAACATTTCCAGCCT----- mirR 21 34
-----TCTCCGAAACATTTCCAGC----- mirR 19 32
-----TCTCCGAAACATTTCCAGCCTT----- mirR 22 29
-----TCCGAAACATTTCCAGCCTTTA---- mirR 22 20
-----CTCCGAAACATTTCCAGCCTTTAC--- mirR 24 17
-----TCCGAAACATTTCCAGCC----- mirR 18 15
-----CCGAAACATTTCCAGCCTTTAC--- mirR 22 14
-----CTCCGAAACATTTCCAGCC----- mirR 19 10
-----CCGAAACATTTCCAGCCTTTA---- mirR 21 9
-----CCGAAACATTTCCAGCCTTT----- mirR 20 8
-----TCCGAAACATTTCCAGCCT----- mirR 19 8
-----CTCCGAAACATTTCCAGC----- mirR 18 7
-----ATCTCCGAAACATTTCCAGCCT----- mirR 22 7
-----TCCGAAACATTTCCAGCCTT----- mirR 20 5
-----CTCCGAAACATTTCCAGCCTT----- mirR 21 5
-----TCTCCGAAACATTTCCAGCCTTTA---- mirR 24 5
-----ATCTCCGAAACATTTCCAGC----- mirR 20 3
-----ATCTCCGAAACATTTCCAG----- mirR 19 2
-----ATCTCCGAAACATTTCCAGCC----- mirR 21 2
-----CCGAAACATTTCCAGCCTT----- mirR 19 2

```

```

-----CGAAACATTCCCAGCCTTTACT-- mirR 22 1
-----GAAACATTCCCAGCCTTTA---- mirR 19 1
-----CTCCGAAACATTCCCAGCCTTTA---- mirR 23 1
-----TCCGAAACATTCCCAGCCTTTACTAA mirR 26 1
-----ATCTCCGAAACATTCCCAGCCTTT---- mirR 24 1
-----CCGAAACATTCCCAGCCT----- mirR 18 1
-----CGAAACATTCCCAGCCTTTA---- mirR 20 1
-----GAAACATTCCCAGCCTTTAC--- mirR 20 1
-----CTCCGAAACATTCCCAGCCT----- mirR 20 1
-----CGAAACATTCCCAGCCTTTAC--- mirR 21 1
-----ATCTCCGAAACATTCCCA----- mirR 18 1

```

>mmu-mir-542

| CTCGGGGATCATCATGTACAGATACCCTGTGCCCTTGTGACAGATTGATAACTGAAAGGTCTGGGAGCCACTCCTC | species | len | reads |
|------------------------------------------------------------------------------|---------|-----|-------|
| CTCGGGGATCATCATGTACAG-----                                                   | mirL    | 21  | 107   |
| CTCGGGGATCATCATGTACAG-----                                                   | mirL    | 22  | 95    |
| CTCGGGGATCATCATGTAC-----                                                     | mirL    | 20  | 28    |
| CTCGGGGATCATCATGTAC-----                                                     | mirL    | 18  | 16    |
| CTCGGGGATCATCATGTAC-----                                                     | mirL    | 19  | 14    |
| -TCGGGGATCATCATGTACAG-----                                                   | mirL    | 22  | 1     |
| -TCGGGGATCATCATGTACAG-----                                                   | mirL    | 20  | 1     |
| -----GATACCACTGTGCCCTTGT-----                                                | loop    | 19  | 1     |
| -----TGTGACAGATTGATAACTGA-----                                               | mirR    | 20  | 139   |
| -----TGTGACAGATTGATAACTGAAA-----                                             | mirR    | 22  | 73    |
| -----TGTGACAGATTGATAACTGAA-----                                              | mirR    | 21  | 70    |
| -----TGTGACAGATTGATAACTGAAAG-----                                            | mirR    | 23  | 19    |
| -----TGTGACAGATTGATAACTG-----                                                | mirR    | 19  | 7     |
| -----GTGACAGATTGATAACTGA-----                                                | mirR    | 19  | 7     |
| -----TGTGACAGATTGATAACT-----                                                 | mirR    | 18  | 5     |
| -----TGTGACAGATTGATAACTGAAAGG-----                                           | mirR    | 24  | 4     |
| -----TTGTGACAGATTGATAACTGA-----                                              | mirR    | 21  | 2     |
| -----GACAGATTGATAACTGAAA-----                                                | mirR    | 19  | 2     |
| -----GACAGATTGATAACTGAA-----                                                 | mirR    | 18  | 2     |
| -----GTGACAGATTGATAACTGAAAG-----                                             | mirR    | 22  | 2     |
| -----GTGACAGATTGATAACTGAA-----                                               | mirR    | 20  | 1     |
| -----GACAGATTGATAACTGAAAGG-----                                              | mirR    | 21  | 1     |
| -----GTGACAGATTGATAACTGAAA-----                                              | mirR    | 21  | 1     |
| -----TGACAGATTGATAACTGA-----                                                 | mirR    | 18  | 1     |
| -----GACAGATTGATAACTGAAAG-----                                               | mirR    | 20  | 1     |
| -----TTGTGACAGATTGATAACTGAA-----                                             | mirR    | 22  | 1     |
| -----GTGACAGATTGATAACTG-----                                                 | mirR    | 18  | 1     |
| -----GGTCTGGGAGCCACTCCTC-----                                                | morR    | 19  | 2     |

>mmu-mir-301b

| GGTGCTCTGACTAGGTTGCACTACTGTCTGTGAGAAGCAGTGCAATGGTATTGTCAAAGCATCTGGGACCAGCCTCGAAGACC | species | len | reads |
|-------------------------------------------------------------------------------------|---------|-----|-------|
| ---GCTCTGACTAGGTTGCACTAC-----                                                       | mirL    | 21  | 10    |

```

---GCTCTGACTAGGTTGCACTACT----- mirL 22 7
GGTGCTCTGACTAGGTTGCAC----- mirL 21 1
---GCTCTGACTAGGTTGCACTACTG----- mirL 23 1
---GCTCTGACTAGGTTGCACT----- mirL 19 1
---GCTCTGACTAGGTTGCACTA----- mirL 20 1
-----ACTGTGCTGTGAGAAGCA----- loop 18 1
-----CAGTGCAATGGTATTGTCAAAGC----- mirR 23 165
-----CAGTGCAATGGTATTGTCAA----- mirR 20 127
-----CAGTGCAATGGTATTGTCAAAA----- mirR 21 83
-----CAGTGCAATGGTATTGTCA----- mirR 19 67
-----CAGTGCAATGGTATTGTCAAAGCAT----- mirR 25 54
-----CAGTGCAATGGTATTGTCAAAG----- mirR 22 23
-----CAGTGCAATGGTATTGTCAAAGCATC----- mirR 26 20
-----AGTGCAATGGTATTGTCAAAGC----- mirR 22 16
-----AGTGCAATGGTATTGTCAA----- mirR 19 7
-----AGTGCAATGGTATTGTCAAAGCAT----- mirR 24 4
-----AGTGCAATGGTATTGTCAAAA----- mirR 20 3
-----AGTGCAATGGTATTGTCAAAGCATC----- mirR 25 3
-----AGTGCAATGGTATTGTCAAAG----- mirR 21 2
-----AGTGCAATGGTATTGTCA----- mirR 18 2
-----TGCAATGGTATTGTCAAAG----- mirR 19 1
-----TGCAATGGTATTGTCAAAGCATC----- mirR 23 1
-----CTGGGACCAGCCTCGAAGACC morR 21 1
-----CTGGGACCAGCCTCGAAG--- morR 18 1

```

>mmu-mir-194-2

```

GACCCCCCGTGGCTCCCACCCTCTGTAACAGCAACTCCATGTGGAAGTCCCAGTGGGCTGCTGTTATCTGGGGTGGCGGCTAGTAC species len reads
GACCCCCCGTGGCTCCCACC----- morL 20 1
-----TGTAACAGCAACTCCATGTGG----- mirL 21 297
-----TGTAACAGCAACTCCATGTG----- mirL 20 74
-----TGTAACAGCAACTCCATGTGGA----- mirL 22 71
-----TGTAACAGCAACTCCATGT----- mirL 19 51
-----TGTAACAGCAACTCCATG----- mirL 18 37
-----GTAACAGCAACTCCATGTGG----- mirL 20 24
-----GTAACAGCAACTCCATGT----- mirL 18 8
-----GTAACAGCAACTCCATGTGGA----- mirL 21 7
-----GTAACAGCAACTCCATGTG----- mirL 19 5
-----CTGTAACAGCAACTCCATGTGG----- mirL 22 1
-----CCAGTGGGGCTGCTGTTATCTGG----- mirR 23 6
-----CCAGTGGGGCTGCTGTTATC----- mirR 20 2
-----CCAGTGGGGCTGCTGTTATCTGGG----- mirR 24 2
-----CCAGTGGGGCTGCTGTTATCT----- mirR 21 1
-----CAGTGGGGCTGCTGTTATC----- mirR 19 1
-----CCAGTGGGGCTGCTGTTATCTGGGG----- mirR 25 1
-----CCAGTGGGGCTGCTGTTATCTG----- mirR 22 1
-----TGGGGTGGCGGCTAGTAC morR 18 1

```



```

>mmu-mir-3107
GCATCCTGTACTGAGCTGCCCCGAGCTGAGCACAGTGAAGGACCTCGGGGCAGCTCAGTACAGGACCCCTCAGGGAGGGCGAG species len reads
---TCCTGTACTGAGCTGCCCCGAGC----- mirL 23 517
----CCTGTACTGAGCTGCCCCGAGC----- mirL 22 11
---TCCTGTACTGAGCTGCCCCGAGCT----- mirL 24 10
---TCCTGTACTGAGCTGCCCCGAGCTG----- mirL 25 2
--ATCCTGTACTGAGCTGCCCCGA----- mirL 22 1
GCATCCTGTACTGAGCTG----- mirL 18 1
---TCCTGTACTGAGCTGCCCCGAGCTGA----- mirL 26 1
-----GCACAGTGAAGGACCTCGG----- loop 19 1
-----GCACAGTGAAGGACCTCG----- loop 18 1
-----CGGGGCAGCTCAGTACAGGACC----- mir 22 16
-----CGGGGCAGCTCAGTACAGGAC----- mirR 21 4
-----CGGGGCAGCTCAGTACAGGACCC----- mir 23 3
-----TCGGGCAGCTCAGTACAGGACC----- mirR 23 1
-----CTCGGGGCAGCTCAGTACAGGAC----- mir 23 1
-----CGGGGCAGCTCAGTACAGGACCC----- mirR 24 1
-----ACCCCTCAGGGAGGGCGAG morR 19 1

```

```

>mmu-mir-504
AGACCCTGGTCTGCACTCTATCTGTAACTTACTGAAGGGAGAGCAGGGCAGGGTTCCATA species len reads
-GACCCTGGTCTGCACTCTAT----- mirL 20 168
-GACCCTGGTCTGCACTCTATCT----- mirL 22 106
-GACCCTGGTCTGCACTCTATC----- mirL 21 105
AGACCCTGGTCTGCACTCTAT----- mirL 21 71
AGACCCTGGTCTGCACTCTATC----- mirL 22 25
-GACCCTGGTCTGCACTCTA----- mirL 19 24
AGACCCTGGTCTGCACTCTATCT----- mirL 23 16
AGACCCTGGTCTGCACTC----- mirL 18 13
-GACCCTGGTCTGCACTCT----- mirL 18 12
AGACCCTGGTCTGCACTCT----- mirL 19 6
---CCTGGTCTGCACTCTATCT----- mirL 19 1
-----GGGAGAGCAGGGCAGGGTTTC----- mirR 21 4
-----AGGGAGAGCAGGGCAGGGTTTC----- mirR 22 3
-----AGGGAGAGCAGGGCAGGGTTT----- mirR 21 3
-----AGGGAGAGCAGGGCAGGGTTTCC----- mirR 23 3
-----GGGAGAGCAGGGCAGGGTTTCC----- mirR 22 2
-----GGGAGAGCAGGGCAGGGTTTCCC----- mirR 23 2
-----AGAGCAGGGCAGGGTTTC----- mirR 18 1
-----GGGAGAGCAGGGCAGGGTTTCCATA mirR 26 1
-----GAAGGGAGAGCAGGGCAGGGTTTC----- mirR 24 1
-----GAGAGCAGGGCAGGGTTTC----- mirR 19 1
-----GGGAGAGCAGGGCAGGGTT----- mirR 19 1

```

>mmu-mir-449a

```

CTGTGTGTGATGGCTTGGCAGTGTATTGTTAGCTGGTTGAGTATGTGAGCGGCACCAGCTAACATGCGACTGCTCTCCTATTGCACACACAATCACCACCAGCATGCATTTACAGCTCATGTATGTGCTTTGCCAT spec
CTGTGTGTGATGGCTTGG-----TGGCAGTGTATTGTTAGCTGGT-----mirL
-----TGGCAGTGTATTGTTAGCTGGT-----mirL
-----TGGCAGTGTATTGTTAGCTGG-----mirL
-----TGGCAGTGTATTGTTAGC-----mirL
-----TGGCAGTGTATTGTTAGCTGGTTG-----mirL
-----GGCAGTGTATTGTTAGCTGGT-----mirL
-----GGCAGTGTATTGTTAGCTGGTT-----mirL
-----GGCAGTGTATTGTTAGCTGG-----mirL
-----GGCAGTGTATTGTTAGCTGGTTG-----mirL
-----CAGTGTATTGTTAGCTGGTT-----mirL
-----GGCAGTGTATTGTTAGCTG-----mirL
-----GCTCATGTATGTGCTTTGC-----mirR
-----GCTCATGTATGTGCTTTGCCA-----mirR
-----GCTCATGTATGTGCTTTGCCAT-----mirR
-----GCTCATGTATGTGCTTTGCC-----mirR
-----ACAGCTCATGTATGTGCT-----mirR

```

>mmu-mir-1959

```

GATTCAAAAAGAAGAGGGCCGGGGATGTAGCTCAGTGGAGGAGTCTCTTGCCCAAAACAGGAAAGGCCCTGGGTT species len reads
-ATTCAAAAAGAAGAGGGC-----morL 18 1
GATTCAAAAAGAAGAGGG-----morL 18 1
-----GGGGATGTAGCTCAGTGG-----mirL 19 241
-----GGGGATGTAGCTCAGTGG-----mirL 18 234
-----GGGGATGTAGCTCAGTGGAG-----mirL 20 53
-----GGGGATGTAGCTCAGTGGAGGA-----mirL 22 12
-----GGGGATGTAGCTCAGTGGAGG-----mirL 21 10
-----GGGATGTAGCTCAGTGGAG-----mirL 19 2
-----GGGATGTAGCTCAGTGG-----mirL 18 1
-----GGATGTAGCTCAGTGG-----mirL 18 1
-----CAGGAAAGGCCCTGGGTT mirR 18 4

```

>mmu-mir-32

```

ATATTGCACATTACTAAGTTGCATGTTGTACGGCCCTCAATGCAATTTAGTGTGTGTGATATTTT species len reads
-TATTGCACATTACTAAGTTGC-----mirL 21 171
-TATTGCACATTACTAAGTTGCA-----mirL 22 153
-TATTGCACATTACTAAGTTG-----mirL 20 62
--ATTGCACATTACTAAGTTGC-----mirL 20 26
-TATTGCACATTACTAAGTT-----mirL 19 26
--ATTGCACATTACTAAGTTGCA-----mirL 21 22
-TATTGCACATTACTAAGT-----mirL 18 15
--ATTGCACATTACTAAGTTG-----mirL 19 8
--ATTGCACATTACTAAGTTGCATG-----mirL 23 3
--ATTGCACATTACTAAGTTGCAT-----mirL 22 3
ATATTGCACATTACTAAGTTG-----mirL 21 2

```

```

---TTGCACATTACTAAGTTG----- mirL 18 1
---TTGCACATTACTAAGTTGC----- mirL 19 1
-----GCATGTTGTCACGGCCTCAAT----- loop 21 1
-----CAATTTAGTGTGTGTGATATT-- mirR 21 17
---TGCAATTTAGTGTGTGTGATAT--- mirR 22 8
-----CAATTTAGTGTGTGTGATATTT- mirR 22 7
-----CAATTTAGTGTGTGTGATAT--- mirR 20 5
---ATGCAATTTAGTGTGTGTGAT---- mirR 21 4
-----CAATTTAGTGTGTGTGAT---- mirR 18 4
---TGCAATTTAGTGTGTGTGAT---- mirR 19 4
---GCAATTTAGTGTGTGTGATAT--- mirR 21 3
-----GCAATTTAGTGTGTGTGATATT-- mirR 22 2
---TGCAATTTAGTGTGTGTGATA--- mirR 21 2
-----CAATTTAGTGTGTGTGATA--- mirR 19 2
---ATGCAATTTAGTGTGTGTGATAT--- mirR 23 2
-----TGCAATTTAGTGTGTGTGAT---- mirR 20 1
---CAATTTAGTGTGTGTGATATTTT mirR 23 1
-----ATGCAATTTAGTGTGTGTG---- mirR 19 1
---TGCAATTTAGTGTGTGTG---- mirR 18 1
-----GCAATTTAGTGTGTGTGAT---- mirR 19 1

```

>mmu-mir-1961

| CTAGCCATATCTGAAGTTCAACACGCCCTCCCCTCTTCTCCTATACGTCTATGGAGGATTTACCTCCATATAACCTTGAGAGATGAGGTAGTAGTTAGAACTTTCATGGAGCAAAAAGCATTTC | species | len | reads |
|------------------------------------------------------------------------------------------------------------------------------|---------|-----|-------|
| -TAGCCATATCTGAAGTTTC-----                                                                                                    | morL    | 18  | 2     |
| -TAGCCATATCTGAAGTTCAAC-----                                                                                                  | morL    | 21  | 1     |
| --AGCCATATCTGAAGTTCAA-----                                                                                                   | morL    | 19  | 1     |
| CTAGCCATATCTGAAGTTCAA-----                                                                                                   | morL    | 21  | 1     |
| -----CACGCCCTCCCCTCTTCTCT-----                                                                                               | mirL    | 19  | 34    |
| -----CACGCCCTCCCCTCTTCC-----                                                                                                 | mirL    | 18  | 30    |
| -----CGCCCTCCCCTCTTCTCCTAT-----                                                                                              | mirL    | 19  | 19    |
| -----GCCCTCCCCTCTTCTCCTAT-----                                                                                               | mirL    | 18  | 18    |
| -----ACGCCCTCCCCTCTTCTCT-----                                                                                                | mirL    | 18  | 12    |
| -----CGCCCTCCCCTCTTCTCCTA-----                                                                                               | mirL    | 18  | 9     |
| -----CGCCCTCCCCTCTTCTCCTATA-----                                                                                             | mirL    | 20  | 9     |
| -----GCCCTCCCCTCTTCTCCTATA-----                                                                                              | mirL    | 19  | 7     |
| -----GCCCTCCCCTCTTCTCCTATAC-----                                                                                             | mirL    | 20  | 5     |
| -----CACGCCCTCCCCTCTTCTCCTAT-----                                                                                            | mirL    | 21  | 3     |
| -----ACAGCCCTCCCCTCTTCTCC-----                                                                                               | mirL    | 19  | 2     |
| -----CGCCCTCCCCTCTTCTCCTATAC-----                                                                                            | mirL    | 21  | 2     |
| -----CGCCCTCCCCTCTTCTCCTATACG-----                                                                                           | mirL    | 22  | 1     |
| -----ACGCCCTCCCCTCTTCTCCTAT-----                                                                                             | mirL    | 20  | 1     |
| -----ACGCCCTCCCCTCTTCTCCTA-----                                                                                              | mirL    | 19  | 1     |
| -----TGAGGTAGTAGTTAGAACT-----                                                                                                | mirR    | 19  | 181   |
| -----TGAGGTAGTAGTTAGAAC-----                                                                                                 | mirR    | 18  | 108   |
| -----TGAGGTAGTAGTTAGAACTTT-----                                                                                              | mirR    | 21  | 40    |
| -----TGAGGTAGTAGTTAGAACTT-----                                                                                               | mirR    | 20  | 33    |

```

-----GAGGTAGTAGTTAGAACT----- mirR 18 6
-----GAGGTAGTAGTTAGAACTT----- mirR 19 2
-----ATGAGGTAGTAGTTAGAACT----- mirR 20 1
-----AGATGAGGTAGTAGTTAG----- mirR 18 1
-----GAGGTAGTAGTTAGAACTTT----- mirR 20 1
-----TGAGGTAGTAGTTAGAACTTTC----- mirR 22 1
-----TGAGGTAGTAGTTAGAACTTTCA----- mirR 23 1
-----ATGGAGCAAAAAGCATTTC morR 19 1

```

>mmu-mir-673

```

GCTTTGGAGCCTGAGGGGCTCACAGCTCTGGTCCTTGGAGCTCCAGAGAAAATGTTGCTCCGGGGCTGAGTTCTGTGCACCCCTTGCCCTCCCACTCC species len reads
GCTTTGGAGCCTGAGGGGC----- morL 19 1
-----CTCACAGCTCTGGTCCTTGGAG----- mirL 21 100
-----CTCACAGCTCTGGTCCTTGGAGC----- mirL 23 55
-----CTCACAGCTCTGGTCCTTGG----- mirL 20 47
-----CTCACAGCTCTGGTCCTTGGAG----- mirL 22 42
-----CTCACAGCTCTGGTCCTTG----- mirL 19 28
-----TCACAGCTCTGGTCCTTGGAGC----- mirL 22 4
-----TCACAGCTCTGGTCCTTGG----- mirL 19 2
-----TCACAGCTCTGGTCCTTGGAG----- mirL 20 1
-----CACAGCTCTGGTCCTTGGAG----- mirL 19 1
-----TCACAGCTCTGGTCCTTGGAGCT----- mirL 23 1
-----TCCGGGGCTGAGTTCTGTGCAC----- mirR 22 82
-----TCCGGGGCTGAGTTCTGTGCACC----- mirR 23 44
-----TCCGGGGCTGAGTTCTGTGCA----- mirR 21 28
-----TCCGGGGCTGAGTTCTGTGC----- mirR 20 27
-----TCCGGGGCTGAGTTCTGTGCACC----- mirR 24 15
-----TCCGGGGCTGAGTTCTGTG----- mirR 19 9
-----TCCGGGGCTGAGTTCTGT----- mirR 18 8
-----CCGGGGCTGAGTTCTGTGCAC----- mirR 21 5
-----CCGGGGCTGAGTTCTGTGCACC----- mirR 23 5
-----CCGGGGCTGAGTTCTGTGCACC----- mirR 22 5
-----CCGGGGCTGAGTTCTGTGC----- mirR 19 2
-----CCGGGGCTGAGTTCTGTGCA----- mirR 20 1
-----CTCCGGGGCTGAGTTCTG----- mirR 18 1
-----CTCCGGGGCTGAGTTCTGTGC----- mirR 21 1
-----CTCCGGGGCTGAGTTCTGT----- mirR 19 1
-----GCTCCGGGGCTGAGTTCT----- mirR 18 1
-----CCCTTGCCCTCCCACTCC morR 19 1

```

>mmu-mir-3078

```

CATGCGACTGGCAGACTGCCCAAAGCCTAGACTGCAGCTACCTGTATTGTGCTTGGGGTGTGCTGGGGTAGTCTTTAGGGGAAGCTGTTTGTACCCGTTGGTGGAGAGCTGTG species len reads
-----GACTGGCAGACTGCCCA----- morL 18 2
CATGCGACTGGCAGACTGCC----- morL 20 1
-----CAAAGCCTAGACTGCAGCTACC----- mirL 22 208
-----AAAGCCTAGACTGCAGCTACCT----- mirL 22 74

```

```

-----CAAAGCCTAGACTGCAGCTACCT----- mirL 23 69
-----CAAAGCCTAGACTGCAGC----- mirL 18 53
-----AAAGCCTAGACTGCAGCTACC----- mirL 21 29
-----CAAAGCCTAGACTGCAGCTAC----- mirL 21 12
-----CAAAGCCTAGACTGCAGCT----- mirL 19 8
-----AAAGCCTAGACTGCAGCTAC----- mirL 20 3
-----AAAGCCTAGACTGCAGCTACCTT----- mirL 23 2
-----CCAAAGCCTAGACTGCAGC----- mirL 19 1
-----CCAAAGCCTAGACTGCAGCTACCT----- mirL 24 1
-----AAAGCCTAGACTGCAGCTACCTTGT----- mirL 25 1
-----AGCCTAGACTGCAGCTACCT----- mirL 20 1
-----TTGCTGGGGTAGTCTTTAG----- mirR 19 7
-----TTGCTGGGGTAGTCTTTAGGG----- mirR 21 5
-----TTGCTGGGGTAGTCTTTAGG----- mirR 20 5
-----TTGCTGGGGTAGTCTTTAGGGGAA----- mirR 24 5
-----TTGCTGGGGTAGTCTTTAGGGGA----- mirR 23 3
-----TTGCTGGGGTAGTCTTTAGGGG----- mirR 22 2
-----GTTGCTGGGGTAGTCTTTAGG----- mirR 21 2
-----TGCTGGGGTAGTCTTTAGGGGA----- mirR 22 2
-----GTTGCTGGGGTAGTCTTTAGGG----- mirR 22 2
-----GTTGCTGGGGTAGTCTTTAG----- mirR 20 1
-----TTGCTGGGGTAGTCTTTAGGGGAAG----- mirR 25 1
-----GGGTTGCTGGGGTAGTCTTTAGGG----- mirR 25 1
-----GGGTTGCTGGGGTAGTCTTTAGGGGAAGCTGT----- mirR 32 1
-----GGGAAGCTGTTTGTCACC----- morR 18 1
-----AAGCTGTTTGTCACCCGT----- morR 18 1
-----GGAAGCTGTTTGTCACCCGTTGGTGGAGAGCTGTG morR 35 1
-----GGGAAGCTGTTTGTCACCCG----- morR 20 1
-----GAAGCTGTTTGTCACCCGTTGGTGG----- morR 25 1

```

>mmu-mir-133a-1

```

GGCAATGCTTTGCTAAAGCTGGTAAAATGGAACCAAATCGCCTCTTCAATGGATTGGTCCCCTTCAACCAGCTGTAGCTATGCATTGATTACACA species len reads
GGCAATGCTTTGCTAAAG----- morL 18 2
-----AGCTGGTAAAATGGAACCAAATC----- mirL 23 17
-----AGCTGGTAAAATGGAACCAAA----- mirL 21 7
-----AGCTGGTAAAATGGAACCAAAT----- mirL 22 5
-----AGCTGGTAAAATGGAACC----- mirL 18 3
-----AGCTGGTAAAATGGAACCAA----- mirL 20 3
-----GCTGGTAAAATGGAACCAAAT----- mirL 21 2
-----TTTGGTCCCCTTCAACCAGCTG----- mirR 22 123
-----TTGGTCCCCTTCAACCAGCTGT----- mirR 22 117
-----TTTGGTCCCCTTCAACCAGCTGT----- mirR 23 99
-----TTGGTCCCCTTCAACCAGCTG----- mirR 21 47
-----TGGTCCCCTTCAACCAGCTGT----- mirR 21 17
-----TTGGTCCCCTTCAACCAGCTGTA----- mirR 23 17
-----TTTGGTCCCCTTCAACCAGCTGTA----- mirR 24 12

```

```

-----TGGTCCCCTTCAACCAGCTG----- mirR 20 9
-----TGGTCCCCTTCAACCAGCTGTAG----- mirR 23 6
-----ATTGGTCCCCTTCAACCAGC----- mirR 21 3
-----GGTCCCCTTCAACCAGCTGT----- mirR 20 2
-----TTTGGTCCCCTTCAACCAGCTGTAG----- mirR 25 2
-----ATTGGTCCCCTTCAACCAGCT----- mirR 22 2
-----TTTGGTCCCCTTCAACCAGC----- mirR 20 2
-----TTTGGTCCCCTTCAACCAG----- mirR 19 1
-----ATTGGTCCCCTTCAACCAGCTGTA----- mirR 25 1
-----TGGTCCCCTTCAACCAGCTGTA----- mirR 22 1
-----TTGGTCCCCTTCAACCAGC----- mirR 19 1
-----TTGGTCCCCTTCAACCAGCTGTAGC----- mirR 25 1
-----GGATTGGTCCCCTTCAA----- mirR 18 1
-----ATTGGTCCCCTTCAACCAG----- mirR 20 1
-----GGTCCCCTTCAACCAGCTG----- mirR 19 1
-----TAGCTATGCATTGATTACACA morR 21 2

```

>mmu-mir-133a-2

```

GAAGCCAAATGCTTTGCTGAAGCTGGTAAATGGAACCAAATCAGCTGTTGGATGGATTGGTCCCCTTCAACCAGCTGTAGCTGC species len reads
GAAGCCAAATGCTTTGCT----- morL 18 1
-----AGCTGGTAAATGGAACCAAATC----- mirL 23 17
-----AGCTGGTAAATGGAACCAAA----- mirL 21 7
-----AGCTGGTAAATGGAACCAAAT----- mirL 22 5
-----AGCTGGTAAATGGAACCAA----- mirL 20 3
-----AGCTGGTAAATGGAACC----- mirL 18 3
-----GCTGGTAAATGGAACCAAAT----- mirL 21 2
-----ATCAGCTGTTGGATGGATT----- loop 19 1
-----TTTGGTCCCCTTCAACCAGCTG----- mirR 22 123
-----TTGGTCCCCTTCAACCAGCTGT----- mirR 22 117
-----TTTGGTCCCCTTCAACCAGCTGT----- mirR 23 99
-----TTGGTCCCCTTCAACCAGCTG----- mirR 21 47
-----TGGTCCCCTTCAACCAGCTGT----- mirR 21 17
-----TTGGTCCCCTTCAACCAGCTGTA----- mirR 23 17
-----TTTGGTCCCCTTCAACCAGCTGTA----- mirR 24 12
-----TGGTCCCCTTCAACCAGCTG----- mirR 20 9
-----TGGTCCCCTTCAACCAGCTGTAG----- mirR 23 6
-----ATTGGTCCCCTTCAACCAGC----- mirR 21 3
-----TTTGGTCCCCTTCAACCAGC----- mirR 20 2
-----GGTCCCCTTCAACCAGCTGT----- mirR 20 2
-----ATTGGTCCCCTTCAACCAGCT----- mirR 22 2
-----TTTGGTCCCCTTCAACCAGCTGTAG----- mirR 25 2
-----GGTCCCCTTCAACCAGCTG----- mirR 19 1
-----TTGGTCCCCTTCAACCAGCTGTAGC----- mirR 25 1
-----ATTGGTCCCCTTCAACCAG----- mirR 20 1
-----ATTGGTCCCCTTCAACCAGCTGTA----- mirR 25 1
-----TTTGGTCCCCTTCAACCAG----- mirR 19 1

```

```
-----TTTGGTCCCCTTCAACCAGCTGTAGCTGC mirR 29 1
-----TGGTCCCCTTCAACCAGCTGTA----- mirR 22 1
-----TTGGTCCCCTTCAACCAGC----- mirR 19 1
-----GGATTTGGTCCCCTTCAA----- mirR 18 1
```

>mmu-mir-18b

```
GCTCCTTGTAATGTGTCTCTTGTGTTAAGGTGCATCTAGTGCTGTTAGTGAAGCAGCTTACAATCTACTGCCCTAAATGCCCTTCTCGCACAGGCTACTTCTTACCTTGCATTTGAAAAGCATATCTTGAGAAAT spec
-CTCCTTGTAATGTGTCTCTCTTG----- morL
-CTCCTTGTAATGTGTCTCTTGTG----- morL
-CTCCTTGTAATGTGTCTCTTGT----- morL
----CTTGTAAATGTGTCTCTTG----- morL
GCTCCTTGTAATGTGTCTCTTG----- morL
-----TAAGGTGCATCTAGTGCTGT----- mirL
-----TAAGGTGCATCTAGTGCTGTT----- mirL
-----TAAGGTGCATCTAGTGCTG----- mirL
-----TAAGGTGCATCTAGTGCTGTTA----- mirL
-----TAAGGTGCATCTAGTGCT----- mirL
-----AAGGTGCATCTAGTGCTGT----- mirL
-----AAGGTGCATCTAGTGCTGTT----- mirL
-----AAGGTGCATCTAGTGCTG----- mirL
-----AAGGTGCATCTAGTGCTGTTA----- mirL
-----AAAAGCATATCTTGAGAA----- mirR
-----AAAAGCATATCTTGAGAAAT----- mirR
```

>mmu-mir-106a

```
TCAAAGTGCTAACAGTGCAGGTAGCTTTTTGAGTTCTACTGCAGTGCCAGCACTTCTTACATTACCATGGTGATTTAATCAGAGGCCGCTGAGTCC species len reads
-CAAAGTGCTAACAGTGCAGGTAGC----- mirL 24 107
-CAAAGTGCTAACAGTGCAGGTAG----- mirL 23 33
-CAAAGTGCTAACAGTGCAGGTA----- mirL 22 24
-CAAAGTGCTAACAGTGCAGGT----- mirL 21 23
-CAAAGTGCTAACAGTGCAG----- mirL 19 15
--AAAGTGCTAACAGTGCAGGTAGC----- mirL 23 3
--AAAGTGCTAACAGTGCAGGT----- mirL 20 2
--AAAGTGCTAACAGTGCAGGTAG----- mirL 22 2
TCAAAGTGCTAACAGTGCAGG----- mirL 21 1
TCAAAGTGCTAACAGTGCAGGT----- mirL 22 1
--AAAGTGCTAACAGTGCAGGTA----- mirL 21 1
-----TAATCAGAGGCCGCTGAG--- mirR 18 270
-----ATCAGAGGCCGCTGAGTCC mirR 19 2
-----TAATCAGAGGCCGCTGAGT-- mirR 19 1
-----TTAATCAGAGGCCGCTGAG--- mirR 19 1
-----ATCAGAGGCCGCTGAGTC- mirR 18 1
```

>mmu-mir-3060

```
TTGCTGGTGATGTCTCTGGCGTGGGGTGGGGAGTGCTTCTGTGCTTCTGGTTGAAGAGAAAATGACCATAGCACAGAAGCACTCCACCAGCTTTGTCTGTGGCTTCTAG species len reads
TTGCTGGTGATGTCTCTGG----- morL 18 2
```

```

-----GGGCGTGGGGGTGGGGAG----- mirL 18 5
-----GGGCGTGGGGGTGGGGAGT----- mirL 19 4
-----GGGCGTGGGGGTGGGGAGTG----- mirL 20 2
-----GGCGTGGGGGTGGGGAGTG----- mirL 19 2
-----GGCGTGGGGGTGGGGAGT----- mirL 18 2
-----CCTGGGCGTGGGGGTGGGG----- mirL 19 2
-----CCTGGGCGTGGGGGTGGGGA----- mirL 20 1
-----ATAGCACAGAAGCACTCCCACC----- mirR 22 131
-----CCATAGCACAGAAGCACTCCCA----- mirR 22 52
-----CCATAGCACAGAAGCACTCCC----- mirR 21 49
-----ATAGCACAGAAGCACTCCC----- mirR 19 28
-----CCATAGCACAGAAGCACTCCCAC----- mirR 23 27
-----CATAGCACAGAAGCACTCCCACC----- mirR 23 25
-----ATAGCACAGAAGCACTCCC----- mirR 18 24
-----ATAGCACAGAAGCACTCCCAC----- mirR 21 21
-----CATAGCACAGAAGCACTCCCAC----- mirR 22 18
-----ATAGCACAGAAGCACTCCCACCA----- mirR 23 16
-----CCATAGCACAGAAGCACTCCC----- mirR 20 11
-----ATAGCACAGAAGCACTCCCA----- mirR 20 10
-----CATAGCACAGAAGCACTCCC----- mirR 19 10
-----CATAGCACAGAAGCACTCCCA----- mirR 21 9
-----CCATAGCACAGAAGCACTCCCACC----- mirR 24 7
-----CATAGCACAGAAGCACTCCC----- mirR 20 5
-----CATAGCACAGAAGCACTC----- mirR 18 3
-----CCATAGCACAGAAGCACTC----- mirR 19 2
-----CATAGCACAGAAGCACTCCCACCA----- mirR 24 1
-----ATAGCACAGAAGCACTCCCACCAG----- mirR 24 1
-----TAGCACAGAAGCACTCCCACC----- mirR 21 1
-----AGCACAGAAGCACTCCCACC----- mirR 20 1
-----AGCTTTGTCTGTGGCTTCAG morR 20 1

```

>mmu-mir-374

```

AAGAAATCCTACTCGGGTGGATATAATAACAACCTGCTAAGTGTCTAGCACTTAGCAGGTTGTATTATCATTGTCCGAGGTTATGGCTCTCGTCTAT species len reads
AAGAAATCCTACTCGGGTGG----- morL 20 2
-----ATATAATACAACCTGCTAAGTG----- mirL 22 127
-----ATATAATACAACCTGCTAAG----- mirL 20 108
-----ATATAATACAACCTGCTAAGT----- mirL 21 57
-----ATATAATACAACCTGCTAAGTGT----- mirL 23 42
-----ATATAATACAACCTGCTAA----- mirL 19 28
-----TAATACAACCTGCTAAGTGTTC----- mirL 22 3
-----TAATACAACCTGCTAAGTGTCT----- mirL 23 1
-----TATAATACAACCTGCTAAG----- mirL 19 1
-----ATAATACAACCTGCTAAGTGT----- mirL 21 1
-----TATAATACAACCTGCTAAGTG----- mirL 21 1
-----CTTAGCAGGTTGTATTATCATT----- mirR 22 43
-----CTTAGCAGGTTGTATTATC----- mirR 19 18

```



```

-----CTTAGCAGGTTGTATTATCAT----- mirR 21 14
-----CTTAGCAGGTTGTATTATCATTG----- mirR 23 10
-----CTTAGCAGGTTGTATTATCA----- mirR 20 5
-----ACTTAGCAGGTTGTATTATCAT----- mirR 22 2
-----CTTAGCAGGTTGTATTATCATTGTC----- mirR 25 2
-----TTAGCAGGTTGTATTATCAT----- mirR 20 1
-----CTTAGCAGGTTGTATTATCATTGT----- mirR 24 1
-----TTAGCAGGTTGTATTATCATT----- mirR 21 1
-----ACTTAGCAGGTTGTATTATC----- mirR 20 1
-----TTAGCAGGTTGTATTATCATTG----- mirR 22 1
-----TTAGCAGGTTGTATTATC----- mirR 18 1
-----GTCCGAGGTTATGGCTCTCGTCTAT morR 25 1

```

>mmu-mir-483

```

GACCGTGGGGGAGAGGGGGAAGACGGGAGAAGAGAAGGGAGTGGTTTTTGGGTGCCTCACTCCTCCCCTCCCGTCTTGTCTCTCCTGCCCTATC species len reads
---CGTGGGGGAGAGGGGGAA----- morL 18 1
GACCGTGGGGGAGAGGGGGAA----- morL 21 1
-ACCGTGGGGGAGAGGGGG----- morL 18 1
---CGTGGGGGAGAGGGGAAG----- morL 19 1
-----AAGACGGGAGAAGAGAAGGGAG----- mirL 22 24
-----AAGACGGGAGAAGAGAAGGGAGT----- mirL 23 17
-----AAGACGGGAGAAGAGAAGGGA----- mirL 21 14
-----AAGACGGGAGAAGAGAAGGG----- mirL 20 7
-----AAGACGGGAGAAGAGAAGG----- mirL 19 4
-----GAAGACGGGAGAAGAGAAG----- mirL 19 4
-----AGACGGGAGAAGAGAAGGG----- mirL 19 2
-----GAAGACGGGAGAAGAGAAGGGA----- mirL 22 1
-----ACGGGAGAAGAGAAGGGA----- mirL 18 1
-----CACTCCTCCCCTCCCGTCTTGT----- mirR 22 216
-----TCACTCCTCCCCTCCCGTCTTGT----- mirR 23 39
-----CACTCCTCCCCTCCCGTCTTGT----- mirR 23 38
-----CACTCCTCCCCTCCCGTCTTG----- mirR 21 26
-----CACTCCTCCCCTCCCGTC----- mirR 18 18
-----CACTCCTCCCCTCCCGTCTTGTT----- mirR 24 16
-----TCACTCCTCCCCTCCCGTC----- mirR 19 8
-----CACTCCTCCCCTCCCGTCT----- mirR 19 8
-----CACTCCTCCCCTCCCGTCTT----- mirR 20 6
-----TCACTCCTCCCCTCCCGTCTTGTT----- mirR 25 3
-----TCACTCCTCCCCTCCCGT----- mirR 18 3
-----TCACTCCTCCCCTCCCGTCTTG----- mirR 22 2
-----ACTCCTCCCCTCCCGTCTTGTT----- mirR 23 2
-----ACTCCTCCCCTCCCGTCTTGT----- mirR 22 1
-----CTCCTCCCCTCCCGTCTT----- mirR 18 1
-----CCTCACTCCTCCCCTCCCGTCTTGT----- mirR 25 1
-----TCACTCCTCCCCTCCCGTCTTGT----- mirR 24 1
-----ACTCCTCCCCTCCCGTCTT----- mirR 19 1

```

```
-----GTTCTCTCCTGCCCTATC morR 18 1

>mmu-mir-758
CACGTGTGGGTGCGTGAGGTGGTTGACCAGAGAGCACACGCTATATTTGTGCCGTTTGTGACCTGGTCCACTAACCCCTC species len reads
---GTGTGGGTGCGTGAGGTG-----morL 18 2
CACGTGTGGGTGCGTGAGGTG-----morL 21 1
-----TGGTTGACCAGAGAGCACACGC-----mirL 22 3
-----TGGTTGACCAGAGAGCACACGC-----mirL 21 3
-----TGGTTGACCAGAGAGCAC-----mirL 18 2
-----GTGGTTGACCAGAGAGCA-----mirL 18 1
-----TGGTTGACCAGAGAGCACA-----mirL 19 1
-----GGTGGTTGACCAGAGAGCAC-----mirL 20 1
-----TTTGTGACCTGGTCCACTAACCC--mirR 23 159
-----TTTGTGACCTGGTCCACTAACCC--mirR 22 99
-----TTTGTGACCTGGTCCACTAAC--mirR 21 28
-----TTTGTGACCTGGTCCACTAA--mirR 20 28
-----TTTGTGACCTGGTCCACTA----mirR 19 28
-----TTTGTGACCTGGTCCACTAACCCCTCmirR 25 18
-----TTTGTGACCTGGTCCACTAACCCCT- mirR 24 16
-----TTGTGACCTGGTCCACTAACCC--mirR 21 15
-----TTGTGACCTGGTCCACTAACCC--mirR 22 15
-----TTGTGACCTGGTCCACTAA----mirR 19 6
-----TTGTGACCTGGTCCACTA----mirR 18 4
-----TTGTGACCTGGTCCACTAAC--mirR 20 2
-----GTGACCTGGTCCACTAACCCCT- mirR 21 1
-----GTTTGTGACCTGGTCCAC-----mirR 18 1
-----TTGTGACCTGGTCCACTAACCCCT- mirR 23 1
-----TGTGACCTGGTCCACTAACCC--mirR 21 1
-----TTGTGACCTGGTCCACTAACCCCTC mirR 24 1

>mmu-mir-1937b-1
GAGAACTGGGGTAGGCCACAAATCCCGGACGAGCCCCACATGTAAGACCCCCATGCTGGGCCTCTGCTTAAGTCCCGGGATGAGCTGGCCAACACCCCAACATCTTGAGAGAAAACCATACC species len rea
GAGAACTGGGGTAGGCCA-----morL 18 1
-----ATCCCGGACGAGCCCCAC-----mirL 19 219
-----TCCCGGACGAGCCCCAC-----mirL 18 53
-----TCCCGGACGAGCCCCACA-----mirL 19 51
-----ATCCCGGACGAGCCCCACA-----mirL 20 46
-----AATCCCGGACGAGCCCCAC-----mirL 20 12
-----ATCCCGGACGAGCCCCACAT-----mirL 21 12
-----ATCCCGGACGAGCCCCACATG-----mirL 22 5
-----TCCCGGACGAGCCCCACAT-----mirL 20 4
-----TCCCGGACGAGCCCCACATG-----mirL 21 4
-----AAATCCCGGACGAGCCCCAC-----mirL 21 2
-----AATCCCGGACGAGCCCCACAT-----mirL 22 2
-----AATCCCGGACGAGCCCCACA-----mirL 21 2
-----CAAATCCCGGACGAGCCCCAC-----mirL 22 2
```

```
-----CCCCGACGAGCCCCACATG----- mirL 20 1
-----CCCCGACGAGCCCCACAT----- mirL 19 1
-----AGCTGGCCAACACCCCAA----- mirR 18 14
-----AGCTGGCCAACACCCCAAC----- mirR 19 2
-----CTTGAGAGAAAACCATAACC morR 19 1
-----CATCTTGAGAGAAAACCA---- morR 18 1
```

>mmu-mir-1937b-3

```
AAATCCCGGACGAGCCCCACATGTAAGATCCCCGAAGCTTAGTCTCTGCTCAAGTCCCGGGATGAGCTGGCTAGCACCCCAATGACTCAAGAGAAAACCA species len reads
--ATCCCGGACGAGCCCCAC----- mirL 19 219
---TCCCGGACGAGCCCCAC----- mirL 18 53
---TCCCGGACGAGCCCCACA----- mirL 19 51
--ATCCCGGACGAGCCCCACA----- mirL 20 46
--ATCCCGGACGAGCCCCACAT----- mirL 21 12
-AATCCCGGACGAGCCCCAC----- mirL 20 12
--ATCCCGGACGAGCCCCACATG----- mirL 22 5
---TCCCGGACGAGCCCCACATG----- mirL 21 4
---TCCCGGACGAGCCCCACAT----- mirL 20 4
-AATCCCGGACGAGCCCCACAT----- mirL 22 2
-AATCCCGGACGAGCCCCACA----- mirL 21 2
AAATCCCGGACGAGCCCCAC----- mirL 21 2
----CCCGGACGAGCCCCACAT----- mirL 19 1
----CCCGGACGAGCCCCACATG----- mirL 20 1
-----TGACTCAAGAGAAAACCA mirR 18 16
```

>mmu-mir-720

```
CAGAATGAAGATGCAGCTTTAGAAATTTGGGTGGTCTATCTCGCTGGGGCCTCCAGAAAATGTGAATCCCACT species len reads
---AATGAAGATGCAGCTTTA----- mirL 18 3
----ATGAAGATGCAGCTTTAG----- mirL 18 1
CAGAATGAAGATGCAGCTTT----- mirL 20 1
-----ATCTCGCTGGGGCCTCCA----- mirR 18 195
-----TCTCGCTGGGGCCTCCAG----- mirR 18 81
-----ATCTCGCTGGGGCCTCCAG----- mirR 19 74
-----TCTCGCTGGGGCCTCCAGAA----- mirR 20 22
-----ATCTCGCTGGGGCCTCCAGA----- mirR 20 11
-----ATCTCGCTGGGGCCTCCAGAA----- mirR 21 8
-----TCTCGCTGGGGCCTCCAGA----- mirR 19 6
-----ATCTCGCTGGGGCCTCCAGAAA----- mirR 22 2
-----TATCTCGCTGGGGCCTCCAG----- mirR 20 2
-----CTCGCTGGGGCCTCCAGA----- mirR 18 2
-----TATCTCGCTGGGGCCTCC----- mirR 18 2
-----CTCGCTGGGGCCTCCAGAA----- mirR 19 2
-----ATCTCGCTGGGGCCTCCAGAAAATG----- mirR 25 1
-----CAGAAAATGTGAATCCCACT----- morR 19 1
-----GAAAATGTGAATCCCACT----- morR 18 1
```

>mmu-mir-224

| Sequence                                                             | species | len | reads |
|----------------------------------------------------------------------|---------|-----|-------|
| TTAAGTCACTAGTGGTCCGTTTAGTAGATGGTTTGTGCATTGTTTCAAATGGTGCCCTAGTGACTACA | mirL    | 22  | 273   |
| -TAAGTCACTAGTGGTCCGTTT-----                                          | mirL    | 21  | 37    |
| -TAAGTCACTAGTGGTCCGTT-----                                           | mirL    | 18  | 34    |
| -TAAGTCACTAGTGGTCCGTTTA-----                                         | mirL    | 23  | 28    |
| -TAAGTCACTAGTGGTCCGTTTAG-----                                        | mirL    | 24  | 12    |
| --AAGTCACTAGTGGTCCGTTT-----                                          | mirL    | 21  | 12    |
| --AAGTCACTAGTGGTCCGTTTA-----                                         | mirL    | 22  | 3     |
| --AAGTCACTAGTGGTCCGTT-----                                           | mirL    | 20  | 2     |
| --AAGTCACTAGTGGTCCGTTTAG-----                                        | mirL    | 23  | 2     |
| TTAAGTCACTAGTGGTCCGTTT-----                                          | mirL    | 23  | 1     |
| TTAAGTCACTAGTGGTCCG-----                                             | mirL    | 20  | 1     |
| --AAGTCACTAGTGGTCCG-----                                             | mirL    | 18  | 1     |
| -----AATGGTGCCCTAGTGACTAC-                                           | mirR    | 20  | 3     |
| -----AATGGTGCCCTAGTGACTA--                                           | mirR    | 19  | 1     |
| -----ATGGTGCCCTAGTGACTAC-                                            | mirR    | 19  | 1     |
| -----AAATGGTGCCCTAGTGACTAC-                                          | mirR    | 21  | 1     |
| -----AATGGTGCCCTAGTGACTACA                                           | mirR    | 21  | 1     |

>mmu-mir-1197

| Sequence                                                                          | species | len | reads |
|-----------------------------------------------------------------------------------|---------|-----|-------|
| CGGTTGACCATGGTGTGTACGCTTTATTTATGACGTAGGACACATGGTCTACTTCTTCTCAATATCACATCTCGCCTTGGA | mirL    | 20  | 1     |
| CGGTTGACCATGGTGTGTAC-----                                                         | mirL    | 18  | 1     |
| ---TTGACCATGGTGTGTACG-----                                                        | mirR    | 21  | 221   |
| -----TAGGACACATGGTCTACTTCT--                                                      | mirR    | 20  | 118   |
| -----TAGGACACATGGTCTACTTC--                                                       | mirR    | 20  | 18    |
| -----TAGGACACATGGTCTACTTCT--                                                      | mirR    | 19  | 18    |
| -----TAGGACACATGGTCTACTTCTT--                                                     | mirR    | 22  | 9     |
| -----TAGGACACATGGTCTACTTCTTC--                                                    | mirR    | 23  | 6     |
| -----TAGGACACATGGTCTACT--                                                         | mirR    | 18  | 3     |
| -----AGGACACATGGTCTACTTC--                                                        | mirR    | 19  | 1     |
| -----GGACACATGGTCTACTTCT--                                                        | mirR    | 19  | 1     |
| -----AGGACACATGGTCTACTTCTTC--                                                     | mirR    | 22  | 1     |
| -----TCAATATCACATCTCGCCTTGGA                                                      | morR    | 23  | 3     |
| -----TCTTCTCAATATCACATC-----                                                      | morR    | 18  | 1     |

>mmu-mir-105

| Sequence                                                                                                                               | species | len | reads |
|----------------------------------------------------------------------------------------------------------------------------------------|---------|-----|-------|
| TCTGTGTGTGCATTTTAGCCAAGTGCTCAGATGCTTGTGGTGGCTGCTTATGCACCACGAATGCTTGAGCATGTGCTATGGTACCTACTTTTACAACATTGCCATCTGCTTCTGGAACAAAGCCATTCATTACT | morL    | 2   |       |
| TCTGTGTGTGCATTTTAGCC-----                                                                                                              | mirL    | 2   |       |
| -----GCCAAGTGCTCAGATGCTTGTG-----                                                                                                       | mirL    | 2   |       |
| -----GCCAAGTGCTCAGATGCTTGT-----                                                                                                        | mirR    | 1   |       |
| -----AACAAAGCCATTCATTAC-                                                                                                               | mirR    | 1   |       |
| -----AACAAAGCCATTCATTACT                                                                                                               | mirR    | 1   |       |

>mmu-mir-1982

```

GGGAGGGGAGTTCTGGCACCCCAACCTCTCACCCATGTTCTCCCACAGCC species len reads
-GGAGGGGAGTTCTGGCAC----- mirL 18 1
GGGAGGGGAGTTCTGGCA----- mirL 18 1
-----TCTCACCCATGTTCTCCCAC--- mirR 21 76
-----TCTCACCCATGTTCTCCCACA-- mirR 22 48
-----TCTCACCCATGTTCTCCCA---- mirR 20 29
-----TCTCACCCATGTTCTCCCACAG-- mirR 23 29
-----TCACCCTATGTTCTCCCAC--- mirR 19 27
-----TCTCACCCATGTTCTCCC----- mirR 19 24
-----TCACCCTATGTTCTCCCACAG-- mirR 21 20
-----TCTCACCCATGTTCTCCCACAGCC mirR 25 18
-----TCACCCTATGTTCTCCCACAGC- mirR 22 17
-----TCACCCTATGTTCTCCCACA-- mirR 20 14
-----TCTCACCCATGTTCTCC----- mirR 18 13
-----CTCACCCATGTTCTCCCAC--- mirR 20 10
-----CTCACCCATGTTCTCCCA---- mirR 19 8
-----TCACCCTATGTTCTCCCACAGCC mirR 23 8
-----CTCACCCATGTTCTCCCACAGC- mirR 23 6
-----TCACCCTATGTTCTCCCA---- mirR 18 5
-----CTCACCCATGTTCTCCCACA-- mirR 21 4
-----CTCACCCATGTTCTCCCACAG-- mirR 22 4
-----CACCCATGTTCTCCCACA-- mirR 19 1
-----CACCCATGTTCTCCCACAG-- mirR 20 1
-----CACCCATGTTCTCCCAC--- mirR 18 1

```

>mmu-mir-10b

```

GTTGTAACGTTGTCTATATATACCCCTGTAGAACCGAATTTGTGTGGTACCCACATAGTCACAGATTCGATTCTAGGGGAATATATGGTCGATGCAAAAACCTTCATATATCTCCGACATGGCCAGAGACT species le
-TTGTAACGTTGTCTATATA----- morL 19 1
----TAACGTTGTCTATATATA----- morL 18 1
GTTGTAACGTTGTCTATA----- morL 18 1
-----TACCCTGTAGAACCGAATTTGT----- mirL 22 210
-----ACCCTGTAGAACCGAATTTGT----- mirL 21 28
-----ACCCTGTAGAACCGAATTTGTGT----- mirL 23 22
-----TACCCTGTAGAACCGAATTTGTG----- mirL 23 22
-----TACCCTGTAGAACCGAATTTG----- mirL 21 20
-----TACCCTGTAGAACCGAATT----- mirL 19 17
-----ACCCTGTAGAACCGAATTTGTG----- mirL 22 13
-----TACCCTGTAGAACCGAATTTGTGT----- mirL 24 10
-----ACCCTGTAGAACCGAATTTG----- mirL 20 3
-----ACCCTGTAGAACCGAATT----- mirL 18 1
-----ATATACCCCTGTAGAACCGA----- mirL 19 1
-----TCTCCGACATGGCCAGAGAC- mirR 20 3
-----TCTCCGACATGGCCAGAG--- mirR 18 2
-----TCTCCGACATGGCCAGAGACT mirR 21 2

```

>mmu-mir-683-1

```
GCATGGGAAGTCCAGCTGGGAGGCTGCAGTGGACCCAGGCTAAAAGCCAAGCTTTTCTGCACTGCAGTGGATGCCTGCTGTAAGCTGTGTCTCCTCGG species len reads
GCATGGGAAGTCCAGCTG-----GCATGCGAGTGGATGCCTGC-----morL 18 1
---TGGGAAGTCCAGCTGGGAGG-----mirL 20 1
-----GGCTGCAGTGGACCCAGG-----mirL 18 1
-----TGCAGTGCAGTGGATGCCTGC-----mirR 21 207
-----GCATGCGAGTGGATGCCTGC-----mirR 20 57
-----TGCAGTGCAGTGGATGCCTGC-----mirR 19 24
-----TGCAGTGCAGTGGATGCCTGC-----mirR 20 20
-----TGCAGTGCAGTGGATGCC-----mirR 18 20
-----GCATGCGAGTGGATGCCTGC-----mirR 18 9
-----TGCAGTGCAGTGGATGCCTGCT-----mirR 22 5
-----CACTGCGAGTGGATGCCTGC-----mirR 19 3
-----TAAGCTGTGTCTCCTCGG-----morR 18 1
```

>mmu-mir-683-2

```
GCATGGGAAGTCCAGCTGGGAGGCTGCAGTGGACCCAGGCTAAAAGCCAAGCTTTTCTGCACTGCAGTGGATGCCTGCTGTAAGCTGTGTCTCCTCGG species len reads
---TGGGAAGTCCAGCTGGGAGG-----morL 20 1
GCATGGGAAGTCCAGCTG-----morL 18 1
-----GGCTGCAGTGGACCCAGG-----mirL 18 1
-----TGCAGTGCAGTGGATGCCTGC-----mirR 21 207
-----GCATGCGAGTGGATGCCTGC-----mirR 20 57
-----TGCAGTGCAGTGGATGCCTGC-----mirR 19 24
-----TGCAGTGCAGTGGATGCCTGC-----mirR 20 20
-----TGCAGTGCAGTGGATGCC-----mirR 18 20
-----GCATGCGAGTGGATGCCTGC-----mirR 18 9
-----TGCAGTGCAGTGGATGCCTGCT-----mirR 22 5
-----CACTGCGAGTGGATGCCTGC-----mirR 19 3
-----TAAGCTGTGTCTCCTCGG-----morR 18 1
```

>mmu-mir-133b

```
TCTGGCTGGTCAAACGGAACCAAGTCCGCTTCTCTGAGAGGTTTGGTCCCCTTCAACCAGCTACAGC species len reads
TCTGGCTGGTCAAACGGAACC-----mirL 21 1
-----AAGTCCGCTTCTCTGAGA-----loop 18 1
-----TTGGTCCCCTTCAACCAGCTAC---mirR 23 150
-----TTGGTCCCCTTCAACCAGCTAC---mirR 22 111
-----TTGGTCCCCTTCAACCAGCTA---mirR 22 25
-----TTGGTCCCCTTCAACCAGCTACA--mirR 24 18
-----TTGGTCCCCTTCAACCAGCTACA--mirR 23 16
-----TGGTCCCCTTCAACCAGCTAC---mirR 21 11
-----TTGGTCCCCTTCAACCAGCTACAGC mirR 25 6
-----TTGGTCCCCTTCAACCAGCTA---mirR 21 5
-----TGGTCCCCTTCAACCAGCTACAGC mirR 24 1
-----TTGGTCCCCTTCAACCAGCTACAG- mirR 24 1
-----TGGTCCCCTTCAACCAGCTA---mirR 20 1
```

>mmu-mir-206

```
GCTTCTTTATATCCTCATAGATATCTCAGCACTATGGAATGTAAGGAAGTGTGTGGTTTTGGCAAGTGCTTC species len reads
GCTTCTTTATATCCTCATA-----mirL 19 1
-----TGGAAATGTAAGGAAGTGTGTGG-----mirR 22 172
-----TGGAAATGTAAGGAAGTGTGT-----mirR 20 55
-----TGGAAATGTAAGGAAGTGTGTG-----mirR 21 33
-----TGGAAATGTAAGGAAGTGTGTGGT-----mirR 23 22
-----TGGAAATGTAAGGAAGTGT-----mirR 18 15
-----GGAATGTAAGGAAGTGTGTGG-----mirR 21 12
-----TGGAAATGTAAGGAAGTGTG-----mirR 19 11
-----TGGAAATGTAAGGAAGTGTGTGGTT-----mirR 24 6
-----GGAATGTAAGGAAGTGTGTG-----mirR 20 5
-----GGAATGTAAGGAAGTGTGT-----mirR 19 5
-----GGAATGTAAGGAAGTGTGTGGT-----mirR 22 1
-----ATGGAATGTAAGGAAGTGTGTGG-----mirR 23 1
-----TGGTTTTGGCAAGTGCTTC morR 19 1
```

>mmu-mir-297a-5

```
TATATGTATGTGTGCATGTGCATGTGTATATGAGTATACATATACATACGCACATACCCATACAAGCATGCACACAAACC species len reads
---ATGTATGTGTGCATGTGCATGT-----mirL 22 163
---ATGTATGTGTGCATGTGC-----mirL 18 31
---ATGTATGTGTGCATGTGCAT-----mirL 20 26
---ATGTATGTGTGCATGTGCATG-----mirL 21 14
---ATGTATGTGTGCATGTGCA-----mirL 19 8
TATATGTATGTGTGCATGTGC-----mirL 21 1
-ATATGTATGTGTGCATGTGCAT-----mirL 22 1
--TATGTATGTGTGCATGTGCATG-----mirL 22 1
---TGTATGTGTGCATGTGCATGT-----mirL 21 1
--TATGTATGTGTGCATGTGCATGT-----mirL 23 1
-----ATATACATACGCACATACCC-----mirR 20 30
-----ATATACATACGCACATACCCATA-----mirR 23 20
-----ATATACATACGCACATACCCAT-----mirR 22 20
-----ATATACATACGCACATACC-----mirR 19 4
-----ATATACATACGCACATACCCA-----mirR 21 2
-----TATACATACGCACATACCCAT-----mirR 21 1
-----ATACATACGCACATACCC-----mirR 18 1
-----TATACATACGCACATACCCATAC-----mirR 23 1
-----CATATACATACGCACATACC-----mirR 20 1
-----TATACATACGCACATACCCATA-----mirR 22 1
-----ATATACATACGCACATAC-----mirR 18 1
-----ATACATACGCACATACCCAT-----mirR 20 1
-----ACATATACATACGCACAT-----mirR 18 1
-----CAAGCATGCACACAAACC morR 18 1
```

>mmu-mir-466c-2

```
CCTACGTATGTGTATATGTGTTGATGTGTGTGCATGTACATATGTGAATATGATATACATATACATACACGCACACATAAGACACATATGAGCACACAGACAGGGGAATGGCACTCGTCAATCCA species le
CCTACGTATGTGTATATGTGT-----morL 21 1
```

```

-----TGATGTGTGTGTCATGTAC----- mirL 20 92
-----GATGTGTGTGTCATGTAC----- mirL 19 79
-----GATGTGTGTGTCATGTACAT----- mirL 21 43
-----TGATGTGTGTGTCATGTACAT----- mirL 22 42
-----TGATGTGTGTGTCATGTACA----- mirL 21 21
-----GATGTGTGTGTCATGTACA----- mirL 20 12
-----GATGTGTGTGTCATGTACATA----- mirL 22 8
-----TGATGTGTGTGTCATGTA----- mirL 19 7
-----GATGTGTGTGTCATGTACATAT----- mirL 23 7
-----TGATGTGTGTGTCATGT----- mirL 18 6
-----ATGTGTGTGTCATGTACAT----- mirL 20 2
-----ATGTGTGTGTCATGTACATAT----- mirL 22 1
-----ATGTGTGTGTCATGTACATA----- mirL 21 1
-----TGTTGATGTGTGTGTCATGTAC----- mirL 23 1
-----GGAATGGCACTCGTCAATC-- mirR 19 1
-----ATGGCACTCGTCAATCCA mirR 18 1

```

>mmu-mir-466c-1

```

TGTTGATGTGTGTGTCATGTACATATGTGAATATGATATACATATACATACACGCACACATAAGACACATATGAGCACACAGACACAGGGGAATGGCACTCAT species len reads
---TGATGTGTGTGTCATGTAC----- mirL 20 92
---GATGTGTGTGTCATGTAC----- mirL 19 79
---GATGTGTGTGTCATGTACAT----- mirL 21 43
---TGATGTGTGTGTCATGTACAT----- mirL 22 42
---TGATGTGTGTGTCATGTACA----- mirL 21 21
---GATGTGTGTGTCATGTACA----- mirL 20 12
---GATGTGTGTGTCATGTACATA----- mirL 22 8
---GATGTGTGTGTCATGTACATAT----- mirL 23 7
---TGATGTGTGTGTCATGTA----- mirL 19 7
---TGATGTGTGTGTCATGT----- mirL 18 6
---ATGTGTGTGTCATGTACAT----- mirL 20 2
---ATGTGTGTGTCATGTACATA----- mirL 21 1
TGTTGATGTGTGTGTCATGTAC----- mirL 23 1
---ATGTGTGTGTCATGTACATAT----- mirL 22 1
-----CAGGGGAATGGCACTCAT mirR 18 1

```

>mmu-mir-3061

```

CAGTGGGCCGTGAAAGGTAGCCTGGTGGTCCCCTTTGAGCTAAGGCTACCTTTGATAGTCCACTGCCCCACGGTGCATGCATTG species len reads
CAGTGGGCCGTGAAAGGTAGCC----- mirL 22 28
CAGTGGGCCGTGAAAGGTAGC----- mirL 21 20
CAGTGGGCCGTGAAAGGTAG----- mirL 20 13
CAGTGGGCCGTGAAAGGTA----- mirL 19 8
CAGTGGGCCGTGAAAGGT----- mirL 18 3
--GTGGGCCGTGAAAGGTAGC----- mirL 19 1
-AGTGGGCCGTGAAAGGTAGCCT----- mirL 22 1
-----CTACCTTTGATAGTCCACTGCC----- mirR 22 58
-----CTACCTTTGATAGTCCACTGC----- mirR 21 55

```



```

-----CTACCTTTGATAGTCCACTGCC----- mirR 23 52
-----CTACCTTTGATAGTCCAC----- mirR 18 34
-----CTACCTTTGATAGTCCACTG----- mirR 20 25
-----CTACCTTTGATAGTCCACTGCC----- mirR 24 7
-----CTACCTTTGATAGTCCACT----- mirR 19 5
-----TACCTTTGATAGTCCACTGCC----- mirR 22 2
-----ACCTTTGATAGTCCACTGCC----- mirR 20 1
-----ACCTTTGATAGTCCACTGC----- mirR 19 1
-----AGGCTACCTTTGATAGTCCA----- mirR 20 1
-----GCTACCTTTGATAGTCCACTGC----- mirR 22 1
-----TACCTTTGATAGTCCACTG----- mirR 19 1
-----CCCACGGTGCATGCATTG morR 18 1

```

>mmu-mir-297a-1

| Sequence                                                                                                   | species | len | reads |
|------------------------------------------------------------------------------------------------------------|---------|-----|-------|
| TGTATGTATGTGTGCATGTGCATGTGCATGTATGCATATTGCATGTATATATTATGCATACATGTATGTATTTGCTTGTGTTTGTATGTGTACTACAGCATGCAGG | mirL 22 | 157 |       |
| ---ATGTATGTGTGCATGTGCATGT                                                                                  | mirL 18 | 31  |       |
| ---ATGTATGTGTGCATGTGC                                                                                      | mirL 20 | 26  |       |
| ---ATGTATGTGTGCATGTGCAT                                                                                    | mirL 21 | 14  |       |
| ---ATGTATGTGTGCATGTGCATG                                                                                   | mirL 19 | 8   |       |
| ---ATGTATGTGTGCATGTGCA                                                                                     | mirL 22 | 1   |       |
| --TATGTATGTGTGCATGTGCATG                                                                                   | mirL 21 | 1   |       |
| -GTATGTATGTGTGCATGTGCA                                                                                     | mirL 20 | 1   |       |
| TGTATGTATGTGTGCATGTG                                                                                       | mirL 21 | 1   |       |
| TGTATGTATGTGTGCATGTGC                                                                                      | mirL 21 | 1   |       |
| ---TGTATGTGTGCATGTGCATGT                                                                                   | mirL 23 | 1   |       |
| --TATGTATGTGTGCATGTGCATGT                                                                                  | mirR 21 | 56  |       |
| -----TATGTGTACTACAGCATGCAG-                                                                                | mirR 20 | 9   |       |
| -----ATGTGTACTACAGCATGCAG-                                                                                 | mirR 22 | 2   |       |
| -----TATGTGTACTACAGCATGCAGG                                                                                | mirR 21 | 1   |       |
| -----ATGTGTACTACAGCATGCAGG                                                                                 | mirR 19 | 1   |       |
| -----TATGTGTACTACAGCATGC---                                                                                | mirR 18 | 1   |       |
| -----TATGTGTACTACAGCATG----                                                                                |         |     |       |

>mmu-mir-214

| Sequence                                                          | species | len | reads |
|-------------------------------------------------------------------|---------|-----|-------|
| TGCCTGTCTACACTTGCTGTGCAGAACATCCGCTCACCTGTACAGCAGGCACAGACAGGCAGTCA | mirL 22 | 22  |       |
| TGCCTGTCTACACTTGCTGTGC                                            | mirL 21 | 10  |       |
| -GCCTGTCTACACTTGCTGTGC                                            | mirL 20 | 5   |       |
| -GCCTGTCTACACTTGCTGTG                                             | mirL 21 | 4   |       |
| TGCCTGTCTACACTTGCTGTG                                             | mirL 18 | 3   |       |
| TGCCTGTCTACACTTGCT                                                | mirL 18 | 2   |       |
| -GCCTGTCTACACTTGCTG                                               | mirL 20 | 2   |       |
| TGCCTGTCTACACTTGCTGT                                              | mirL 23 | 1   |       |
| TGCCTGTCTACACTTGCTGTGCA                                           | mirL 19 | 1   |       |
| ---CTGTCTACACTTGCTGTGC                                            | mirL 30 | 1   |       |
| -GCCTGTCTACACTTGCTGTGCAGAACATCC                                   | loop    | 19  | 2     |
| -----GAACATCCGCTCACCTGTA                                          |         |     |       |

```

-----TGCAGAACATCCGCTCACC----- loop 19 1
-----AGAACATCCGCTCACCTGT----- loop 19 1
-----ACAGCAGGCACAGACAGGCAGTC- mirR 23 64
-----ACAGCAGGCACAGACAGGCAG--- mirR 21 45
-----ACAGCAGGCACAGACAGGCAGT-- mirR 22 42
-----ACAGCAGGCACAGACAGGC----- mirR 19 27
-----ACAGCAGGCACAGACAGGCA---- mirR 20 14
-----TACAGCAGGCACAGACAGG----- mirR 19 9
-----TACAGCAGGCACAGACAGGC---- mirR 20 9
-----ACAGCAGGCACAGACAGG----- mirR 18 7
-----TACAGCAGGCACAGACAGGCA---- mirR 21 7
-----TACAGCAGGCACAGACAGGCAGTC- mirR 24 7
-----TACAGCAGGCACAGACAGGCAG-- mirR 22 4
-----ACAGCAGGCACAGACAGGCAGTCA mirR 24 4
-----TACAGCAGGCACAGACAG----- mirR 18 4
-----TACAGCAGGCACAGACAGGCAGT-- mirR 23 2
-----AGCAGGCACAGACAGGCA---- mirR 18 1
-----CAGCAGGCACAGACAGGCAGT-- mirR 21 1
-----GTACAGCAGGCACAGACAGGC---- mirR 21 1

```

>mmu-mir-3059

```

TATCACAGGTGGTACGCCCTTTCCTCTCTGCCCCATAGGGTGTAGCTCTAACTACCCTCTAGGGAAGAGAAGGTTGGGTGAACAGCCTTACTAT species len reads
TATCACAGGTGGTACGCC----- morL 19 1
--TCACAGGTGGTACGCCCT----- morL 18 1
-ATCACAGGTGGTACGCC----- morL 18 1
-----TTCCTCTCTGCCCCATAGG----- mirL 20 59
-----TTCCTCTCTGCCCCATAG----- mirL 19 47
-----TTCCTCTCTGCCCCATA----- mirL 18 45
-----TTCCTCTCTGCCCCATAGGG----- mirL 21 45
-----TTCCTCTCTGCCCCATAGGGTGT----- mirL 24 30
-----TTCCTCTCTGCCCCATAGGG----- mirL 20 7
-----TTCCTCTCTGCCCCATAGGGTG----- mirL 22 4
-----TTCCTCTCTGCCCCATAGG----- mirL 19 4
-----TTCCTCTCTGCCCCATAGGGTGT----- mirL 23 4
-----TTCCTCTCTGCCCCATAG----- mirL 18 3
-----CCCTTTCCTCTCTGCCCC----- mirL 18 1
-----AGGGTGTAGCTCTAACTACC----- loop 20 1
-----CCTCTAGGGAAGAGAAGGTTGG----- mirR 22 14
-----CCTCTAGGGAAGAGAAGGTTG----- mirR 21 13
-----CCCTCTAGGGAAGAGAAGGTTG----- mirR 22 3
-----CCCTCTAGGGAAGAGAAG----- mirR 18 2
-----CCTCTAGGGAAGAGAAGGTT----- mirR 20 2
-----CCTCTAGGGAAGAGAAGGTTGGG----- mirR 23 2
-----TCTAGGGAAGAGAAGGTTGG----- mirR 20 2
-----CTAGGGAAGAGAAGGTTGGG----- mirR 20 1
-----CCTCTAGGGAAGAGAAGGT----- mirR 19 1

```

```
-----TCTAGGGAAGAGAAGGTTGGGTG----- mirR 23 1
-----TACCCCTAGGGAAGAGAA----- mirR 19 1
-----GGTGAACAGCCTTACTAT morR 18 1
```

>mmu-mir-491

```
TTGACTTAGCTGGGAAGTGGGGAACCCCTCCATGAGGAGTAGAACACTCCTTATGCAAGATTCCCTTCTACCT species len reads
TTGACTTAGCTGGGAAGT----- morL 18 1
-----AGTGGGGAACCCCTCCATGAG----- mirL 22 28
-----AGTGGGGAACCCCTCCATGAG----- mirL 21 18
-----AGTGGGGAACCCCTCCATGA----- mirL 20 16
-----AGTGGGGAACCCCTCCATG----- mirL 19 9
-----AGTGGGGAACCCCTCCAT----- mirL 18 8
-----CTTATGCAAGATTCCCTTCTAC-- mirR 22 98
-----CTTATGCAAGATTCCCTTCT---- mirR 20 32
-----CTTATGCAAGATTCCCTTCTA-- mirR 21 30
-----CTTATGCAAGATTCCCTTCTACC- mirR 23 14
-----CTTATGCAAGATTCCCTTCTC-- mirR 19 12
-----TTATGCAAGATTCCCTTCTAC-- mirR 21 7
-----TTATGCAAGATTCCCTTCT---- mirR 19 6
-----CTTATGCAAGATTCCCTT----- mirR 18 5
-----TTATGCAAGATTCCCTTCTA-- mirR 20 3
-----TTATGCAAGATTCCCTTCTACC- mirR 22 3
-----TATGCAAGATTCCCTTCTAC-- mirR 20 1
-----TATGCAAGATTCCCTTCTACCT mirR 22 1
-----CCTTATGCAAGATTCCCTT----- mirR 19 1
-----TTATGCAAGATTCCCTTCTC-- mirR 18 1
```

>mmu-mir-122

```
CTGTGGAGTGTGACAATGGTGTGTTGTGTCCAAACCATCAAACGCCATTATCACACTAAATAGCTACTGCTAGGCAATCCGTCCACTCCACGCGTGA species len reads
---TGGAGTGTGACAATGGTGTGTT----- mirL 21 138
---TGGAGTGTGACAATGGTGTGTTG----- mirL 22 61
---TGGAGTGTGACAATGGTGTGTTGT----- mirL 23 36
---TGGAGTGTGACAATGGTGTGTT----- mirL 20 21
---TGGAGTGTGACAATGGTGT----- mirL 19 11
---GGAGTGTGACAATGGTGTGTTG----- mirL 21 4
---GGAGTGTGACAATGGTGTGTT----- mirL 20 3
---GGAGTGTGACAATGGTGTGTT----- mirL 19 3
---GGAGTGTGACAATGGTGTGTTGT----- mirL 22 2
CTGTGGAGTGTGACAATGGTGT----- mirL 22 1
-----CCGTCCACTCCACGCGTGA mirR 19 2
-----TCCGTCCACTCCACGCGT-- mirR 18 1
```

>mmu-mir-1934

```
TTTCTGGTCCCCTGCTTCGTCCTCTGTCCAGATGTTAAGAGGATGACGGTGGGGCTGGTGAGATGGCTCAGCGGTTAAGAGC species len reads
--TCTGGTCCCCTGCTTCGTCCTC----- mirL 22 24
--TCTGGTCCCCTGCTTCGTCCT----- mirL 21 8
```

```

--TCTGGTCCCCTGCTTCGTCCTCT----- mirL 23 8
--TCTGGTCCCCTGCTTCGTC----- mirL 19 7
--TCTGGTCCCCTGCTTCGTC----- mirL 20 6
TTTCTGGTCCCCTGCTTC----- mirL 18 3
---CTGGTCCCCTGCTTCGTCCTCT----- mirL 22 2
-TTCTGGTCCCCTGCTTCGTCCTC----- mirL 23 2
---CTGGTCCCCTGCTTCGTCCT----- mirL 20 1
---CTGGTCCCCTGCTTCGTC----- mirL 18 1
-----GGGGCTGGTGAGATGGCTCAGC----- mirR 22 75
-----GGGCTGGTGAGATGGCTCAGC----- mirR 21 25
-----GGGGCTGGTGAGATGGCTC----- mirR 19 22
-----GGGCTGGTGAGATGGCTCAGCGG----- mirR 23 16
-----GGGGCTGGTGAGATGGCTCA----- mirR 20 13
-----GGGCTGGTGAGATGGCTCAGCGGTT----- mirR 25 12
-----GGGCTGGTGAGATGGCTC----- mirR 18 8
-----GGGCTGGTGAGATGGCTCAGCGGTTA----- mirR 26 7
-----GGGGCTGGTGAGATGGCT----- mirR 18 5
-----GGGGCTGGTGAGATGGCTCAGCGGT----- mirR 25 5
-----GGGCTGGTGAGATGGCTCAGCG----- mirR 22 4
-----GCTGGTGAGATGGCTCAGC----- mirR 19 3
-----GGGCTGGTGAGATGGCTCAG----- mirR 20 2
-----GGGGCTGGTGAGATGGCTCAG----- mirR 21 2
-----GGCTGGTGAGATGGCTCAGC----- mirR 20 2
-----TGGGGCTGGTGAGATGGCTCAGCGGTTA----- mirR 28 1
-----GGTGGGGCTGGTGAGATGGCT----- mirR 21 1
-----TGGGGCTGGTGAGATGGC----- mirR 18 1
-----GGCTGGTGAGATGGCTCAG----- mirR 19 1
-----GGCTGGTGAGATGGCTCAGCGGT----- mirR 23 1
-----GGCTGGTGAGATGGCTCAGCGGTT----- mirR 24 1
-----GGCTGGTGAGATGGCTCAGCGGTTA----- mirR 25 1
-----GCTGGTGAGATGGCTCAGCGGTT----- mirR 23 1
-----TGGGGCTGGTGAGATGGCTCA----- mirR 21 1
-----GGGGCTGGTGAGATGGCTCAGCGGTTAAGAGC----- mirR 32 1
-----GTGGGGCTGGTGAGATGGCTCAGC----- mirR 24 1
-----GGCTGGTGAGATGGCTCAGCGG----- mirR 22 1
-----GCTGGTGAGATGGCTCAGCGGTTAA----- mirR 25 1
-----TGGGGCTGGTGAGATGGCTCAGC----- mirR 23 1

```

>mmu-mir-669d-2

```

ATATGTGCATGTGTATATACTTGTGTGTGCATGTATATGTGTCTATATGAATATACATATACATACACACCCATATACACACGCATGCACGGAACACAAAAACATAAACATAAACACAG species len reads
ATATGTGCATGTGTGTATAC----- morL 20 8
ATATGTGCATGTGTATATACT----- morL 21 4
ATATGTGCATGTGTATATA----- morL 19 2
--ATGTGCATGTGTATATACT----- morL 19 1
--ATGTGCATGTGTATAC----- morL 18 1
-----ACTTGTGTGTGCATGTATAT----- mirL 20 131

```

```

-----ACTTGTGTGTGCATGTATATGT----- mirL 22 45
-----ACTTGTGTGTGCATGTATATG----- mirL 21 28
-----ACTTGTGTGTGCATGTATA----- mirL 19 21
-----ACTTGTGTGTGCATGTAT----- mirL 18 18
-----TACTTGTGTGTGCATGTAT----- mirL 19 1
-----CTTGTGTGTGCATGTATATGT----- mirL 21 1
-----CTTGTGTGTGCATGTATATGTGTC----- mirL 24 1
-----AAAAACATAAACATAAAAC----- mirR 18 5
-----AAACATAAACATAAAACACA----- mirR 19 1
-----AAACATAAACATAAAACACAG----- mirR 20 1

```

>mmu-mir-297a-2

```

TGTATGTGCATGCATATGTGCTCATGTGTGTGTACATGTATGTGTGCATGTGCATGTATATATGTGTGTGCATGCATGTGT species len reads
-GTATGTGCATGCATATGTGC----- mirL 20 1
TGTATGTGCATGCATATGTG----- mirL 20 1
-----GCTCATGTGTGTGTACAT----- loop 18 1
-----ATGTATGTGTGCATGTGCATGT----- mirR 22 163
-----ATGTATGTGTGCATGTGC----- mirR 18 31
-----ATGTATGTGTGCATGTGCAT----- mirR 20 26
-----ATGTATGTGTGCATGTGCATG----- mirR 21 14
-----ATGTATGTGTGCATGTGCATGTA----- mirR 23 9
-----ATGTATGTGTGCATGTGC----- mirR 19 8
-----ATGTATGTGTGCATGTGCATGTAT----- mirR 24 2
-----TGTATGTGTGCATGTGCATGT----- mirR 21 1
-----CATGTATGTGTGCATGTGCATGT----- mirR 23 1
-----TATATGTGTGTGCATGCATG----- morR 20 1
-----GTATATATGTGTGTGCATGC----- morR 20 1
-----TATGTGTGTGCATGCATGTGT----- morR 21 1
-----ATATATGTGTGTGCATGC----- morR 18 1

```

>mmu-mir-297a-6

```

TGTGTGCATTGTGCATGTGCATGTGTGTATGTGCATGAGTGCATGTGCATGCATGTGTGTGCGCATGTATGTGTGCATGTGCATGTATGTGTGCATGTGCATGTGTG species len reads
-GTGTGCATTGTGCATGTG----- morL 18 1
---GTGCATTGTGCATGTGCAT----- morL 19 1
TGTGTGCATTGTGCATGTGC----- morL 20 1
-----ATGTGTGTATGTGCATGA----- mirL 18 2
-----ATGTGTGTATGTGCATGAGTG----- mirL 21 1
-----TGTGTGTATGTGCATGAG----- mirL 18 1
-----ATGTGTGTATGTGCATGAGT----- mirL 20 1
-----ATGTATGTGTGCATGTGCATGT----- mirR 22 163
-----ATGTATGTGTGCATGTGC----- mirR 18 31
-----ATGTATGTGTGCATGTGCAT----- mirR 20 26
-----ATGTATGTGTGCATGTGCATG----- mirR 21 14
-----ATGTATGTGTGCATGTGCA----- mirR 19 8
-----ATGTATGTGTGCATGTGCATGTG----- mirR 23 7
-----TGTATGTGTGCATGTGCATGT----- mirR 21 1

```

-----ATGTATGTGTGCATGTGCATGTGTG mirR 25 1  
-----CATGTATGTGTGCATGTGCATGT--- mirR 23 1

>mmu-mir-669d

|                                                                                                        | species | len | reads |
|--------------------------------------------------------------------------------------------------------|---------|-----|-------|
| TACTTGTGTGTGCATGTATATGTGTGTATATGAATATACATATACATACACACCCATATACACACGCATGCATGCACACACACAAATACATATACACAGGAA | mirL 20 | 131 |       |
| -ACTTGTGTGTGCATGTATAT-                                                                                 | mirL 22 | 45  |       |
| -ACTTGTGTGTGCATGTATATGT-                                                                               | mirL 21 | 28  |       |
| -ACTTGTGTGTGCATGTATATG-                                                                                | mirL 19 | 21  |       |
| -ACTTGTGTGTGCATGTATA-                                                                                  | mirL 18 | 18  |       |
| -ACTTGTGTGTGCATGTAT-                                                                                   | mirL 21 | 1   |       |
| --CTTGTGTGTGCATGTATATGT-                                                                               | mirL 19 | 1   |       |
| TACTTGTGTGTGCATGTAT-                                                                                   | mirR 18 | 10  |       |
| -----AAATACATATACACAGGA-                                                                               | mirR 19 | 1   |       |
| -----CAAATACATATACACAGGA-                                                                              | mirR 20 | 1   |       |
| -----CAAATACATATACACAGGAA                                                                              |         |     |       |

>mmu-mir-297a-3

|                                                                                                                       | species | len | reads |
|-----------------------------------------------------------------------------------------------------------------------|---------|-----|-------|
| TATATGTATGTGTGCATGTGCATGTGTGTATATGAATATACATATACATACACACATACCCATACAAAATGCACACAAAACACACAGAAAATTGACACTCATCGATCCATTTCAATG | mirL 22 | 163 |       |
| ---ATGTATGTGTGCATGTGCATGT-                                                                                            | mirL 18 | 31  |       |
| ---ATGTATGTGTGCATGTGC-                                                                                                | mirL 20 | 26  |       |
| ---ATGTATGTGTGCATGTGCAT-                                                                                              | mirL 21 | 14  |       |
| ---ATGTATGTGTGCATGTGCA-                                                                                               | mirL 19 | 8   |       |
| TATATGTATGTGTGCATGTGC-                                                                                                | mirL 21 | 1   |       |
| -ATATGTATGTGTGCATGTGCAT-                                                                                              | mirL 22 | 1   |       |
| --TATGTATGTGTGCATGTGCATG-                                                                                             | mirL 22 | 1   |       |
| ---TGTATGTGTGCATGTGCATGT-                                                                                             | mirL 21 | 1   |       |
| --TATGTATGTGTGCATGTGCATGT-                                                                                            | mirL 23 | 1   |       |
| -----CACACAGAAAATTGACAC-                                                                                              | mirR 18 | 3   |       |
| -----AACACACAGAAAATTGACACT-                                                                                           | mirR 21 | 2   |       |
| -----CACACAGAAAATTGACACTC-                                                                                            | mirR 20 | 1   |       |
| -----ACACACAGAAAATTGACA-                                                                                              | mirR 18 | 1   |       |
| -----AACACACAGAAAATTGACAC-                                                                                            | mirR 20 | 1   |       |
| -----ACTCATCGATCCATTTCAATG                                                                                            | morR 21 | 1   |       |

>mmu-mir-297a-4

|                                                                                                                                            | species | len | reads |
|--------------------------------------------------------------------------------------------------------------------------------------------|---------|-----|-------|
| TATATGTATGTGTGCATGTGCATGTGTGTATATGAGTATACATATACATACACACATACCCATACAAAGCATGCACACAAATACACGAAAATCGCCACTCATGGATCCATTTGAATGATATGTGACTTAGTCTTAGAG | mi      |     |       |
| ---ATGTATGTGTGCATGTGCATGT-                                                                                                                 | mi      |     |       |
| ---ATGTATGTGTGCATGTGC-                                                                                                                     | mi      |     |       |
| ---ATGTATGTGTGCATGTGCAT-                                                                                                                   | mi      |     |       |
| ---ATGTATGTGTGCATGTGCATG-                                                                                                                  | mi      |     |       |
| ---ATGTATGTGTGCATGTGCA-                                                                                                                    | mi      |     |       |
| TATATGTATGTGTGCATGTGC-                                                                                                                     | mi      |     |       |
| -ATATGTATGTGTGCATGTGCAT-                                                                                                                   | mi      |     |       |
| --TATGTATGTGTGCATGTGCATG-                                                                                                                  | mi      |     |       |
| ---TGTATGTGTGCATGTGCATGT-                                                                                                                  | mi      |     |       |

```
--TATGTATGTGTGCATGTGCATGT-----mi
-----GATATGTGACTTAGTCTT-----mi
-----TATGTGACTTAGTCTTAGAG-----mi

>mmu-mir-709
ACAGAGTAATTAGTGTGCCGTTTCTCTGCTTCTACTCAGAAGTGCTCTGAGCATAGAAGTGTCTGTTTGAGCAGCACTGGGGAGGCAGAGGCAGGAGGATTGCTTTTTGTTATATTGACTT species len re
ACAGAGTAATTAGTGTGTC-----morL 19 1
-----TCCCGTTTCTCTGCTTCTA-----mirL 19 1
-----GGAGGCAGAGGCAGGAGGATTGTC-----mirR 24 54
-----GGGGAGGCAGAGGCAGGAGGATT-----mirR 23 31
-----GAGGCAGAGGCAGGAGGATTGTC-----mirR 23 27
-----AGGCAGAGGCAGGAGGATT-----mirR 19 19
-----GGCAGAGGCAGGAGGATTGTC-----mirR 21 18
-----GGAGGCAGAGGCAGGAGGAT-----mirR 20 17
-----GGAGGCAGAGGCAGGAGGATTG-----mirR 22 10
-----GAGGCAGAGGCAGGAGGAT-----mirR 19 10
-----GGAGGCAGAGGCAGGAGGATTGT-----mirR 23 6
-----GAGGCAGAGGCAGGAGGATT-----mirR 20 5
-----AGGCAGAGGCAGGAGGAT-----mirR 18 4
-----GAGGCAGAGGCAGGAGGATTG-----mirR 21 4
-----GGAGGCAGAGGCAGGAGGATT-----mirR 21 4
-----GGAGGCAGAGGCAGGAGGA-----mirR 19 3
-----AGGCAGAGGCAGGAGGATTG-----mirR 20 3
-----GGCAGAGGCAGGAGGATTG-----mirR 19 3
-----GGGAGGCAGAGGCAGGAGGATT-----mirR 22 2
-----GGGAGGCAGAGGCAGGAGGATTG-----mirR 23 2
-----GGAGGCAGAGGCAGGAGG-----mirR 18 2
-----GAGGCAGAGGCAGGAGGA-----mirR 18 2
-----TGGGGAGGCAGAGGCAGGAG-----mirR 20 2
-----TGGGGAGGCAGAGGCAGGAGGATT-----mirR 24 2
-----TGGGGAGGCAGAGGCAGGAGGAT-----mirR 23 2
-----GGGAGGCAGAGGCAGGAGGAT-----mirR 21 1
-----GGGAGGCAGAGGCAGGAGGAT-----mirR 22 1
-----GGGAGGCAGAGGCAGGAG-----mirR 18 1
-----TGGGGAGGCAGAGGCAGGAGG-----mirR 21 1
-----AGGCAGAGGCAGGAGGATTGTCTT-----mirR 24 1
-----GGCAGAGGCAGGAGGATT-----mirR 18 1
-----GGGAGGCAGAGGCAGGAGGA-----mirR 20 1
-----GGCAGAGGCAGGAGGATTGT-----mirR 20 1
-----GGGGAGGCAGAGGCAGGAGG-----mirR 20 1
-----GAGGCAGAGGCAGGAGGATTGTCTT-----mirR 25 1
-----GAGGCAGAGGCAGGAGGATTGT-----mirR 22 1
-----GGCAGAGGCAGGAGGATTGTCT-----mirR 22 1
-----TCTTTTGTATATTGACT-----morR 18 2
-----TCTTTTGTATATTGACTT-----morR 19 1
```

>mmu-mir-190b

```

CCTGCCTGCTTCTGTGTGATATGTTTGGATATTGGGTTGTTAAATTATGAACCAACTGAATGTCAAGCATACTCTCACAGCAGTAAGGAGACTTGGCACCACCTCCTTGGC species len reads
CCTGCCTGCTTCTGTGTGA-----TGATATGTTTGGATATTGGGTT-----mirL 19 1
-----TGATATGTTTGGATATTGGGTT-----mirL 21 134
-----TGATATGTTTGGATATTGGGTTG-----mirL 22 45
-----TGATATGTTTGGATATTGGGTTGT-----mirL 23 22
-----TGATATGTTTGGATATTGGGT-----mirL 20 19
-----GATATGTTTGGATATTGGGTT-----mirL 20 9
-----TGATATGTTTGGATATTGGG-----mirL 19 5
-----GATATGTTTGGATATTGGGTTG-----mirL 21 3
-----GATATGTTTGGATATTGGGTTGT-----mirL 22 2
-----GATATGTTTGGATATTGGGT-----mirL 19 1
-----CTCTCACAGCAGTAAGGA-----mirR 18 3
-----CTCACAGCAGTAAGGAGA-----mirR 18 1
-----TCTCACAGCAGTAAGGAG-----mirR 18 1
-----TCACAGCAGTAAGGAGACTT-----mirR 20 1
-----GACTTGGCACCACCTCCTTGGC morR 22 1

```

>mmu-mir-1188

```

ACTCACAGTCTCCCAGCTGGTGTGAGGTTGGGCCAGGATGAAACCAAGGCTCTCCGAGGCTCCCCACCACACCCTGCTGCTGAAGACTGCCT species len reads
ACTCACAGTCTCCCAGCT-----morL 18 2
--TCACAGTCTCCCAGCTGG-----morL 18 1
-----TGGTGTGAGGTTGGGCCAGGAT-----mirL 22 34
-----TGGTGTGAGGTTGGGCCAGG-----mirL 20 20
-----TGGTGTGAGGTTGGGCCAGGA-----mirL 21 15
-----TGGTGTGAGGTTGGGCCAGGATG-----mirL 23 12
-----TGGTGTGAGGTTGGGCCAG-----mirL 19 9
-----GGTGTGAGGTTGGGCCAGGAT-----mirL 21 3
-----GGTGTGAGGTTGGGCCAGG-----mirL 19 2
-----GGTGTGAGGTTGGGCCAGGA-----mirL 20 2
-----CTGGTGTGAGGTTGGGCC-----mirL 18 1
-----GCTGGTGTGAGGTTGGGCC-----mirL 19 1
-----TGTGAGGTTGGGCCAGGA-----mirL 18 1
-----GGTGTGAGGTTGGGCCAGGATG-----mirL 22 1
-----TCCGAGGCTCCCCACCACACC-----mirR 22 37
-----CGAGGCTCCCCACCACACCCTGC-----mirR 23 15
-----CGAGGCTCCCCACCACACCCT-----mirR 21 14
-----TCCGAGGCTCCCCACCACAC-----mirR 20 8
-----TCCGAGGCTCCCCACCACACCCTGC-----mirR 25 8
-----TCCGAGGCTCCCCACCAC-----mirR 18 8
-----CGAGGCTCCCCACCACACCCTG-----mirR 22 7
-----CGAGGCTCCCCACCACACC-----mirR 20 7
-----CGAGGCTCCCCACCACACC-----mirR 19 6
-----TCCGAGGCTCCCCACCACACC-----mirR 21 5
-----TCCGAGGCTCCCCACCACACCCT-----mirR 23 5
-----TCTCCGAGGCTCCCCACC-----mirR 18 5

```



```

-----TCCGAGGCTCCCCACCACACCCCTG----- mirR 24 4
-----CCGAGGCTCCCCACCACACCCCT----- mirR 22 2
-----CCGAGGCTCCCCACCACAC----- mirR 19 2
-----CCGAGGCTCCCCACCACACCC----- mirR 21 2
-----CCGAGGCTCCCCACCACACCCCTGC----- mirR 24 2
-----CGAGGCTCCCCACCACAC----- mirR 18 2
-----TCTCCGAGGCTCCCCACCACACCC----- mirR 24 1
-----TCTCCGAGGCTCCCCACCACA----- mirR 21 1
-----CTGCTGCTGAAGACTGCC----- morR 18 1
-----TGCTGCTGAAGACTGCCT----- morR 18 1

```

>mmu-mir-3473

```

CAGTCGGGTGCTCTTACCTGTTGAGCCATCTCACCAGCCCAGAAAATATTTTAAAAAGTGAATTGTCTTAAGCTGGAGAGATGGCTCAGCAGTTAAGAGCACTGACTGCTCTTCCAGAG species len reads
-AGTCGGGTGCTCTTACCTGTTGA----- morL 23 1
-AGTCGGGTGCTCTTACCTG----- morL 19 1
CAGTCGGGTGCTCTTACCTGTTGA----- morL 24 1
-----GAGCCATCTCACCAGCCC----- mirL 18 4
-----GAGCCATCTCACCAGCCCAG----- mirL 20 3
-----AGCCATCTCACCAGCCCA----- mirL 18 3
-----TGAGCCATCTCACCAGCCCAG----- mirL 21 2
-----TGAGCCATCTCACCAGCCCAGA----- mirL 22 2
-----GAGCCATCTCACCAGCCCA----- mirL 19 2
-----GTTGAGCCATCTCACCAGCCC----- mirL 21 1
-----GAGCCATCTCACCAGCCCAGAAA----- mirL 23 1
-----TGAGCCATCTCACCAGCC----- mirL 18 1
-----GTTGAGCCATCTCACCAGCCCA----- mirL 22 1
-----GCCATCTCACCAGCCCAG----- mirL 18 1
-----AGCCATCTCACCAGCCCAGA----- mirL 20 1
-----AGCCATCTCACCAGCCCAG----- mirL 19 1
-----GTTGAGCCATCTCACCAGC----- mirL 19 1
-----CCATCTCACCAGCCCAGAA----- mirL 19 1
-----AAGCTGGAGAGATGGCTCAGC----- mirR 21 153
-----AAGCTGGAGAGATGGCTCAGCAGTT----- mirR 25 17
-----AAGCTGGAGAGATGGCTC----- mirR 18 9
-----AAGCTGGAGAGATGGCTCAGCA----- mirR 22 7
-----AAGCTGGAGAGATGGCTCAG----- mirR 20 6
-----TAAGCTGGAGAGATGGCTCAGC----- mirR 22 5
-----AAGCTGGAGAGATGGCTCAGCAG----- mirR 23 5
-----AAGCTGGAGAGATGGCTCA----- mirR 19 4
-----TTAAGCTGGAGAGATGGCTC----- mirR 20 2
-----CTGGAGAGATGGCTCAGCAGT----- mirR 21 1
-----CTGGAGAGATGGCTCAGCA----- mirR 19 1
-----AGCTGGAGAGATGGCTCAGCAGT----- mirR 23 1
-----GCTGGAGAGATGGCTCAGCAGTT----- mirR 23 1
-----GCTGGAGAGATGGCTCAGCAG----- mirR 21 1
-----TAAGCTGGAGAGATGGCTCAGCAGTTAAGAGC----- mirR 32 1

```

```
-----TAAGCTGGAGAGATGGCTCAGCAGT----- mirR 25 1
-----GTTAAGAGCACTGACTGCTCTTCCAGAG morR 28 1
-----TAAGAGCACTGACTGCTCTTCC----- morR 22 1
-----AGCAGTTAAGAGCACTGACT----- morR 20 1
```

>mmu-mir-1964

```
AGCTGGAGCACAAAAGCCGGTGCCGGTGTGATGCCTACACCGACTTCTGGGCTCCGGCTTTGG species len reads
AGCTGGAGCACAAAAGCCGGTGC----- mirL 23 21
AGCTGGAGCACAAAAGCCGGT----- mirL 21 6
AGCTGGAGCACAAAAGCCGGTGCC----- mirL 24 5
AGCTGGAGCACAAAAGCCGG----- mirL 20 4
AGCTGGAGCACAAAAGCCGGTG----- mirL 22 3
-----CCGACTTCTGGGCTCCGGCTTT-- mirR 22 100
-----CCGACTTCTGGGCTCCGGC----- mirR 19 34
-----CCGACTTCTGGGCTCCGGCTT-- mirR 21 15
-----CCGACTTCTGGGCTCCGG----- mirR 18 14
-----CCGACTTCTGGGCTCCGGCTTTG- mirR 23 11
-----CCGACTTCTGGGCTCCGGCT---- mirR 20 11
-----CCGACTTCTGGGCTCCGGCTTTGG mirR 24 4
-----ACCGACTTCTGGGCTCCGGCTTT-- mirR 23 4
-----CGACTTCTGGGCTCCGGCTTT-- mirR 21 1
-----ACCGACTTCTGGGCTCCGGC----- mirR 20 1
-----ACCGACTTCTGGGCTCCGGCTTTGG mirR 25 1
-----ACCGACTTCTGGGCTCCGG----- mirR 19 1
-----CGACTTCTGGGCTCCGGCT---- mirR 19 1
-----ACCGACTTCTGGGCTCCG----- mirR 18 1
```

>mmu-mir-499

```
GTCTTGGGTGGGCAGCTGTTAAGACTTGCAGTGATGTTTAGCTCCTCTGCATGTGAACATCACAGCAAGTCTGTGCTGC species len reads
GTCTTGGGTGGGCAGCTG----- morL 18 1
-----TTAAGACTTGCAGTGATGTTT----- mirL 21 82
-----TTAAGACTTGCAGTGATGTTTA----- mirL 22 43
-----TTAAGACTTGCAGTGATGTT----- mirL 20 28
-----TAAGACTTGCAGTGATGTTT----- mirL 20 18
-----TTAAGACTTGCAGTGATG----- mirL 18 9
-----TAAGACTTGCAGTGATGTT----- mirL 19 6
-----TTAAGACTTGCAGTGATGTTTAG----- mirL 23 6
-----TAAGACTTGCAGTGATGTTTA----- mirL 21 4
-----TAAGACTTGCAGTGATGTTTAGC----- mirL 23 2
-----TAAGACTTGCAGTGATGTTTAG----- mirL 22 1
-----AACATCACAGCAAGTCTGTGCT-- mirR 22 17
-----AACATCACAGCAAGTCTGTGTC--- mirR 21 5
-----AACATCACAGCAAGTCTG----- mirR 18 2
-----GAACATCACAGCAAGTCTGTGTC--- mirR 22 2
-----GAACATCACAGCAAGTCTGTG--- mirR 21 1
-----ATCACAGCAAGTCTGTGCTGC mirR 21 1
```

```

-----GAACATCACAGCAAGTCTGTGCT-- mirR 23 1
-----GAACATCACAGCAAGTCTGT----- mirR 20 1
-----AACATCACAGCAAGTCTGT----- mirR 19 1
-----AACATCACAGCAAGTCTGTGCTG- mirR 23 1
-----GAACATCACAGCAAGTCTG----- mirR 19 1

```

>mmu-mir-3087

```

AGGCCGTGGGCTGGGGCTGTAGCACAGGGCAGGGCAAGAGTTGAGACTTATGGCTCCTAACTCACTGTCATGTCCTCAGATTACGGCTGTCACCTGA species len reads
AGGCCGTGGGCTGGGGCTGTA----- morL 21 1
-----CACAGGGCAGGGCAAGAGTTG----- mirL 21 7
-----CAGGGCAGGGCAAGAGTTGAG----- mirL 21 4
-----CAGGGCAGGGCAAGAGTTGAGAC----- mirL 23 3
-----CAGGGCAGGGCAAGAGTTGAGA----- mirL 22 3
-----ACAGGGCAGGGCAAGAGTTGAGAC----- mirL 24 3
-----ACAGGGCAGGGCAAGAGTTG----- mirL 20 2
-----ACAGGGCAGGGCAAGAGTTGAG----- mirL 22 2
-----CAGGGCAGGGCAAGAGTTGA----- mirL 20 2
-----CACAGGGCAGGGCAAGAGTTGAGAC----- mirL 25 1
-----CAGGGCAGGGCAAGAGTTG----- mirL 19 1
-----ACAGGGCAGGGCAAGAGT----- mirL 18 1
-----AGGGCAGGGCAAGAGTTGA----- mirL 19 1
-----CTCACTGTCATGTCCTCAG----- mirR 19 67
-----TAACTCACTGTCATGTCCTCA----- mirR 21 34
-----TAACTCACTGTCATGTCCTC----- mirR 20 32
-----TAACTCACTGTCATGTCCTCAG----- mirR 22 17
-----TAACTCACTGTCATGTCCT----- mirR 19 11
-----CTCACTGTCATGTCCTCA----- mirR 18 6
-----TAACTCACTGTCATGTC----- mirR 18 5
-----AACTCACTGTCATGTCCTC----- mirR 19 4
-----TAACTCACTGTCATGTCCTCAGA----- mirR 23 4
-----TCACTGTCATGTCCTCAGATT----- mirR 21 2
-----AACTCACTGTCATGTCCTCA----- mirR 20 2
-----CTCACTGTCATGTCCTCAGAT----- mirR 21 2
-----AACTCACTGTCATGTCCT----- mirR 18 2
-----CTCACTGTCATGTCCTCAGATT----- mirR 22 2
-----AACTCACTGTCATGTCCTCAG----- mirR 21 2
-----ACTCACTGTCATGTCCTCAG----- mirR 20 2
-----AACTCACTGTCATGTCCTCAGA----- mirR 22 1
-----CTCACTGTCATGTCCTCAGA----- mirR 20 1
-----ACTCACTGTCATGTCCTC----- mirR 18 1
-----ACTGTCATGTCCTCAGAT----- mirR 18 1
-----ATTACGGCTGTCACCTGA morR 18 1

```

>mmu-mir-489

```

AGTGGCAGCTTGGTTGTATGTGTGATGACACTTTCTAAAGTCTCCAGAATGACACCACATATATGGCAGCTAACTGTTACATGGAAC species len reads
AGTGGCAGCTTGGTTGTC----- morL 18 1

```

```

-----TATGTGTGATGACACTTTC----- mirL 19 2
-----ATGTGTGATGACACTTTC----- mirL 18 1
-----TTCTAAAGTCTTCCAGAA----- loop 18 1
-----AATGACACCACATATATGGCAGC----- mirR 23 128
-----AATGACACCACATATATGGC----- mirR 20 23
-----AATGACACCACATATATGGCA----- mirR 21 18
-----AATGACACCACATATATGGCAG----- mirR 22 17
-----AATGACACCACATATATGGCAGCT----- mirR 24 8
-----ATGACACCACATATATGGCAG----- mirR 21 7
-----ATGACACCACATATATGGCAGC----- mirR 22 5
-----AATGACACCACATATATGG----- mirR 19 5
-----TGACACCACATATATGGCAG----- mirR 20 2
-----AATGACACCACATATATG----- mirR 18 2
-----GACACCACATATATGGCAGCT----- mirR 21 2
-----TGACACCACATATATGGCAGC----- mirR 21 1
-----TAAACTGTTACATGGAAC morR 18 1

```

>mmu-mir-10a

```

GACCTGTCTGTCTTCTGTATATACCCTGTAGATCCGAATTTGTGTAAGGAATTTTGTGGTCACAAATTCGTATCTAGGGGAATATGTAGTTGACATA species len reads
-----GTCTGTCTTCTGTATATA----- morL 18 1
GACCTGTCTGTCTTCTGT----- morL 18 1
-----TACCCTGTAGATCCGAATTTGT----- mirL 22 93
-----ACCCTGTAGATCCGAATTTGT----- mirL 21 27
-----ACCCTGTAGATCCGAATTTGTG----- mirL 22 19
-----TACCCTGTAGATCCGAATTTGTG----- mirL 23 18
-----ACCCTGTAGATCCGAATTTGTGT----- mirL 23 15
-----TACCCTGTAGATCCGAATTTG----- mirL 21 7
-----TACCCTGTAGATCCGAATTT----- mirL 20 6
-----TACCCTGTAGATCCGAAT----- mirL 18 4
-----ACCCTGTAGATCCGAATTTGTGTA----- mirL 24 2
-----ACCCTGTAGATCCGAATTT----- mirL 19 2
-----CCTGTAGATCCGAATTTGT----- mirL 19 1
-----CCCTGTAGATCCGAATTTGTG----- mirL 21 1
-----ATACCCTGTAGATCCGAATT----- mirL 20 1
-----AGGAATTTTGTGGTCACAA----- loop 19 1
-----AATTCGTATCTAGGGGAA----- mirR 18 13
-----ATTCGTATCTAGGGGAAT----- mirR 18 6
-----TCGTATCTAGGGGAATAT----- mirR 18 2
-----CAAATTCGTATCTAGGGGAATA----- mirR 22 1
-----GAATATGTAGTTGACATA morR 18 1

```

>mmu-mir-363

```

CAGGTGGAACACGATGCAATTTTGGTTGGTGTAAATAGGAGGAAAATTGCACGGTATCCATCTGTAAACCGCAGGACCTATGTGGACAG species len reads
CAGGTGGAACACGATGCAATTT----- mirL 23 1
-----AATTGCACGGTATCCATCTGTAA----- mirR 23 69
-----ATTGCACGGTATCCATCTGTAA----- mirR 22 67

```

```

-----AATTGCACGGTATCCATCTGTA----- mirR 22 18
-----AATTGCACGGTATCCATCTGT----- mirR 21 16
-----ATTGCACGGTATCCATCTGTA----- mirR 21 8
-----AATTGCACGGTATCCATCTG----- mirR 20 6
-----AATTGCACGGTATCCATCT----- mirR 19 5
-----ATTGCACGGTATCCATCTGT----- mirR 20 4
-----ATTGCACGGTATCCATCTGTAAA----- mirR 23 3
-----TTGCACGGTATCCATCTGTAA----- mirR 21 2
-----ATTGCACGGTATCCATCTG----- mirR 19 2
-----AATTGCACGGTATCCATCTGTAAA----- mirR 24 1
-----ATTGCACGGTATCCATCT----- mirR 18 1
-----AAATTGCACGGTATCCATCTG----- mirR 21 1
-----ATTGCACGGTATCCATCTGTAAAC----- mirR 24 1
-----AAATTGCACGGTATCCATC----- mirR 19 1
-----CGCAGGACCTATGTGGAC-- morR 18 7
-----CGCAGGACCTATGTGGACA- morR 19 3
-----CGCAGGACCTATGTGGACAG morR 20 1
-----CCGCAGGACCTATGTGGA-- morR 18 1
-----GCAGGACCTATGTGGACAG morR 19 1

```

>mmu-mir-344f

```

CAGTCAGTCTCCTGGCTGGAGTCCAGCTCTAAGCTGGTTCAGGCTCTAGCCAGGACCTGACTACAACC species len reads
-AGTCAGTCTCCTGGCTGGAGTCC----- mirL 23 27
-AGTCAGTCTCCTGGCTGGAGTCC----- mirL 22 19
-AGTCAGTCTCCTGGCTGGAGT----- mirL 21 5
-AGTCAGTCTCCTGGCTGGAG----- mirL 19 5
-AGTCAGTCTCCTGGCTGG----- mirL 18 3
CAGTCAGTCTCCTGGCTGGAGTCC----- mirL 24 2
---TCAGTCTCCTGGCTGGAG----- mirL 18 1
---TCAGTCTCCTGGCTGGAGTCC----- mirL 21 1
-----CTCTAGCCAGGACCTGACTAC--- mirR 21 84
-----CTCTAGCCAGGACCTGACTACA--- mirR 22 21
-----CTCTAGCCAGGACCTGACT----- mirR 19 10
-----CTCTAGCCAGGACCTGACT----- mirR 18 9
-----CTCTAGCCAGGACCTGACTACAA-- mirR 23 5
-----CTCTAGCCAGGACCTGACTA----- mirR 20 4
-----CTCTAGCCAGGACCTGACTACAACC mirR 25 3
-----TCTAGCCAGGACCTGACTACA--- mirR 21 2
-----TCTAGCCAGGACCTGACTAC--- mirR 20 2
-----GGCTCTAGCCAGGACCTGACT----- mirR 20 1
-----GCTCTAGCCAGGACCTGACTAC--- mirR 22 1
-----CTAGCCAGGACCTGACTACAA-- mirR 21 1

```

>mmu-mir-1941

```

AAAGCCAGCAGGGTGGGAGGAGATGCTGGTACAGAGCTTGGGGTTTTGAGGGCATCTTAGCAGTATCTCCATCCACC species len reads
--AGCCAGCAGGGTGGGAGG----- morL 18 1

```

```

AAAGCCAGCAGGGTGGGA----- morL 18 1
-----AGGGAGATGCTGGTACAGAGGC----- mirL 22 6
-----GAGGGAGATGCTGGTACAGAG----- mirL 21 3
-----GAGGGAGATGCTGGTACAGAGGC----- mirL 23 3
-----AGGGAGATGCTGGTACAGAG----- mirL 20 2
-----AGGGAGATGCTGGTACAGA----- mirL 19 2
-----GAGGGAGATGCTGGTACAGAGGCT----- mirL 24 1
-----AGGGAGATGCTGGTACAGAGGCTT----- mirL 24 1
-----GAGGGAGATGCTGGTACAGA----- mirL 20 1
-----GAGGGAGATGCTGGTACAG----- mirL 19 1
-----CATCTTAGCAGTATCTCCCATC----- mirR 22 42
-----ATCTTAGCAGTATCTCCCATCC----- mirR 22 40
-----CATCTTAGCAGTATCTCCCATCC----- mirR 23 33
-----CATCTTAGCAGTATCTCCC----- mirR 19 14
-----CATCTTAGCAGTATCTCCCAT----- mirR 21 11
-----CATCTTAGCAGTATCTCCCA----- mirR 20 9
-----ATCTTAGCAGTATCTCCCATC----- mirR 21 9
-----ATCTTAGCAGTATCTCCCAT----- mirR 20 3
-----CATCTTAGCAGTATCTCC----- mirR 18 3
-----TCTTAGCAGTATCTCCCATCC----- mirR 21 2
-----ATCTTAGCAGTATCTCCCATCCA----- mirR 23 2
-----ATCTTAGCAGTATCTCCCATCCACC----- mirR 25 1
-----CTTAGCAGTATCTCCCATCC----- mirR 20 1

```

>mmu-mir-1943

```

TGGGGAGCCTCTGGCTGGGAAGGGAGGATCTGGGCACCTGGACCAGCTCCTCCCTGCAGGTGCCAGCTCCTCCCTTCCCAGTCACCAGGACCAG species len reads
TGGGGAGCCTCTGGCTGG----- morL 18 1
-----AAGGGAGGATCTGGGCACCTGGACC----- mirL 25 4
-----AGGGAGGATCTGGGCACCT----- mirL 19 3
-----AGGGAGGATCTGGGCACCTGGAC----- mirL 23 3
-----AGGGAGGATCTGGGCACCTGG----- mirL 21 3
-----AGGGAGGATCTGGGCACCTGGAA----- mirL 22 2
-----AAGGGAGGATCTGGGCACCTGGA----- mirL 23 2
-----GAAGGGAGGATCTGGGCACC----- mirL 20 1
-----AGGGAGGATCTGGGCACCTGGACC----- mirL 24 1
-----AAGGGAGGATCTGGGCAC----- mirL 18 1
-----AAGGGAGGATCTGGGCACC----- mirL 19 1
-----CAGGTGCCAGCTCCTCCCTT----- mirR 20 79
-----CAGGTGCCAGCTCCTCCCTTC----- mirR 21 60
-----CAGGTGCCAGCTCCTCCCTTCC----- mirR 22 16
-----CAGGTGCCAGCTCCTCCCT----- mirR 19 7
-----CAGGTGCCAGCTCCTCCC----- mirR 18 2
-----CAGGTGCCAGCTCCTCCCTTCCC----- mirR 23 2
-----TCCCAGTCACCAGGACCAG----- morR 19 1

```

>mmu-mir-1195

```

ACTTGGGAGGTAGAGGCAGGCAGATCTCTGTGAGTTCGAGGCCAGCCTGCTCAACAGAATGAGTTCAGGGCAGCCAGGAACACACAGAGAAACCCTGTCTCAAGAAGGTA AAAAGTAAAAAAAAAAAAAAAAAGAAAAAG
-----GGAGGTAGAGGCAGGCAGATCT-----
ACTTGGGAGGTAGAGGCAGGCAGATCTCT-----
-----GGGAGGTAGAGGCAGGCAGATC-----
-----GAGGTAGAGGCAGGCAGAT-----
-----GAGGCAGGCAGATCTCTGT-----
-----TGTGAGTTCGAGGCCAGCCTGC-----
-----CTGTGAGTTCGAGGCCAGCCTGC-----
-----GAGTTCGAGGCCAGCCTGC-----
-----GTGAGTTCGAGGCCAGCCT-----
-----CTCTGTGAGTTCGAGGCC-----
-----TGTGAGTTCGAGGCCAGCC-----
-----TGTGAGTTCGAGGCCAGCCTG-----
-----TGTGAGTTCGAGGCCAGC-----
-----GTGAGTTCGAGGCCAGCCTGC-----
-----TGTGAGTTCGAGGCCAGCCT-----
-----CTCTGTGAGTTCGAGGCCAGCCTGC-----
-----CTCTGTGAGTTCGAGGCCAGC-----
-----CTGTGAGTTCGAGGCCAGCC-----
-----GTGAGTTCGAGGCCAGCCTG-----
-----CTGTGAGTTCGAGGCCAGC-----
-----GTGAGTTCGAGGCCAGCC-----
-----GAGTTCGAGGCCAGCCTGCTCAA-----
-----CTCTGTGAGTTCGAGGCCAGCC-----
-----TGAGTTCGAGGCCAGCCTGC-----
-----CTGTGAGTTCGAGGCCAGCCT-----
-----TAAAAAGTAAAAAAAAAAAA-----
-----AAAAGTAAAAAAAAAAAAAAAA-----
-----AAAAGTAAAAAAAAAAAAAAAA-----
-----AAAAAAAAAGAAAAAG-----
-----AAAAAAAAAGAAAAAG-----
-----AAAAAAAAAGAAAAAG-----

```

>mmu-mir-3097

| Sequence                                                                           | species | len | reads |
|------------------------------------------------------------------------------------|---------|-----|-------|
| GACACAGGTGGGAAGTGTGTGTCAGTGGGTGTGTCTACAGATCTGCTCAGACCTTCTACCTGTCAGCTCTCTTACAGGGCCC | mirL    | 22  | 23    |
| --CACAGGTGGGAAGTGTGTGTC                                                            | mirL    | 20  | 9     |
| --CACAGGTGGGAAGTGTGTGTC                                                            | mirL    | 24  | 6     |
| --CACAGGTGGGAAGTGTGTGTC                                                            | mirL    | 21  | 6     |
| --CACAGGTGGGAAGTGTGTGTC                                                            | mirL    | 23  | 5     |
| --CACAGGTGGGAAGTGTGTGTC                                                            | mirL    | 22  | 4     |
| --CACAGGTGGGAAGTGTGTGTC                                                            | mirL    | 21  | 4     |
| --CACAGGTGGGAAGTGTGTGTC                                                            | mirL    | 23  | 3     |
| GACACAGGTGGGAAGTGTGT                                                               | mirL    | 20  | 1     |
| --CACAGGTGGGAAGTGTGTGTC                                                            | mirL    | 25  | 1     |
| --CACAGGTGGGAAGTGTGTGTC                                                            | mirL    | 24  | 1     |

```

-----CTCAGACCTTTCTACCTGTCA----- mirR 21 30
-----CTCAGACCTTTCTACCTGTCAGC----- mirR 23 25
-----CTCAGACCTTTCTACCTGTC----- mirR 20 15
-----CTCAGACCTTTCTACCTGTCAG----- mirR 22 11
-----TCAGACCTTTCTACCTGTCAGC----- mirR 22 10
-----CTCAGACCTTTCTACCTGT----- mirR 19 10
-----TCAGACCTTTCTACCTGTCAG----- mirR 21 2
-----TCAGACCTTTCTACCTGT----- mirR 18 2
-----TCAGACCTTTCTACCTGTCAGCT----- mirR 23 1
-----TCAGACCTTTCTACCTGTCA----- mirR 20 1
-----CTCAGACCTTTCTACCTGTCAGCTC----- mirR 25 1
-----TCAGACCTTTCTACCTGTC----- mirR 19 1
-----CAGCTCTCTTACAGGGCC----- morR 18 1
-----AGCTCTTTACAGGGCC morR 18 1

```

>mmu-mir-202

```

ATTCTCGCTGGCTGTTCTTTTTCCTATGCATATACTTCTTTGTGGATCTGGTCTAAAGAGGTATAGCGCATGGGAAGATGGAGCAGTGAGATCTTCCCCACCCAAACAAAGTCATTAGCATCTGCTTCCTGACC spec
ATTCTCGCTGGCTGTTCTT----- morL
-----GCTGGCTGTTCTTTTTC----- morL
-----TTCCTATGCATATACTTCTT----- mirL
-----TTCCTATGCATATACTTCTTT----- mirL
-----TCCTATGCATATACTTCTTT----- mirL
-----TTCCTATGCATATACTTCT----- mirL
-----TTCCTATGCATATACTTCT----- mirL
-----TTCCTATGCATATACTTCTTTG----- mirL
-----TCCTATGCATATACTTCTT----- mirL
-----TTTCCCTATGCATATACTTCTTT----- mirL
-----TTTCCCTATGCATATACTTCTT----- mirL
-----TCCTATGCATATACTTCTTTGT----- mirL
-----TTTCCCTATGCATATACTTCT----- mirL
-----TCCTATGCATATACTTCT----- mirL
-----CCCAAACAAAGTCATTAG----- mirR
-----AGCATCTGCTTCCTGACC morR

```

>mmu-mir-486

```

TCTGATCTCGCCCTCCCTGAGGGGTCCTGTACTGAGCTGCCCGAGGTCCTTCACTGTGCTCAGCTCGGGGCAGCTCAGTACAGGATGCGTCAGGGTGGGAGACAACGGG species len reads
TCTGATCTCGCCCTCCCTGAGG----- morL 22 4
-----CTCGCCCTCCCTGAGGG----- morL 18 1
TCTGATCTCGCCCTCCCTGAGG----- morL 23 1
-----TCTCGCCCTCCCTGAGG----- morL 18 1
-----TCCTGTACTGAGCTGCCCGAGG----- mirL 23 38
-----TCCTGTACTGAGCTGCCCGAGGTC----- mirL 25 32
-----TCCTGTACTGAGCTGCCCGAGGT----- mirL 24 16
-----CCTGTACTGAGCTGCCCGAGG----- mirL 22 4
-----GGTCTGTACTGAGCTGCCCG----- mirL 21 4
-----TCCTGTACTGAGCTGCCCG----- mirL 19 4

```



```

-----CCTGTTACTGAGCTGCCCCGAGGTCC----- mirL 25 2
-----CCTGTTACTGAGCTGCCCCGAG----- mirL 21 2
-----GTCCTGTACTGAGCTGCCCCG----- mirL 21 1
-----GTCCTGTACTGAGCTGCCCCGA----- mirL 22 1
-----GTCCTGTACTGAGCTGCCC----- mirL 19 1
-----CCTGTTACTGAGCTGCCCCGAGGT----- mirL 23 1
-----GGTCTGTACTGAGCTGCCCCG----- mirL 22 1
-----GTCCTTCACTGTGCTCAG----- loop 18 1
-----CCTTCACTGTGCTCAGCTCG----- loop 20 1
-----TTCACCTGTGCTCAGCTCG----- loop 18 1
-----CGGGGCAGCTCAGTACAGGATGC----- mirR 23 21
-----CGGGGCAGCTCAGTACAGGAT----- mirR 21 14
-----CGGGGCAGCTCAGTACAGGATG----- mirR 22 10
-----GGGCAGCTCAGTACAGGATGCG----- mirR 22 1
-----CGGGGCAGCTCAGTACAGGATGCG----- mirR 24 1
-----AGGGTGGGAGACAACGGG morR 18 1

```

>mmu-mir-615

```

GGAGGGGCGGGAGGGGGTCCCCGGTGTCTCGGATCTCGAGGGTGCTTATTGTTCCGGTCCGAGCCTGGGTCTCCCTCTTCCCCCATCCCCCTCAG species len reads
---GGGGCGGGAGGGGGTCC----- mirL 18 60
---GGGGCGGGAGGGGGTCCC----- mirL 19 38
---GGGGCGGGAGGGGGTCCC----- mirL 18 15
---GGGGCGGGAGGGGGTCCCC----- mirL 20 14
---GGGGCGGGAGGGGGTCCCC----- mirL 19 7
---GGGGCGGGAGGGGGTCCCC----- mirL 18 4
---AGGGGCGGGAGGGGGTCC----- mirL 19 3
GGAGGGGCGGGAGGGGGT----- mirL 19 2
-GAGGGGCGGGAGGGGGTCC----- mirL 20 2
---GGGGCGGGAGGGGGTCCCCG----- mirL 19 1
---GGGGCGGGAGGGGGTCCCCGGT----- mirL 23 1
---AGGGGCGGGAGGGGGTCC----- mirL 18 1
---AGGGGCGGGAGGGGGTCCC----- mirL 20 1
-GAGGGGCGGGAGGGGGTCCC----- mirL 21 1
-----TCCGAGCCTGGGTCTCCCTCT----- mirR 21 4
-----TCCGAGCCTGGGTCTCCCTCTC----- mirR 23 2
-----TCCGAGCCTGGGTCTCCC----- mirR 18 1
-----CCGAGCCTGGGTCTCCCTCTT----- mirR 21 1
-----TCCGAGCCTGGGTCTCCCT----- mirR 19 1
-----TCTTCCCCCATCCCC----- morR 18 2
-----TCCCCCATCCCCCTCAG morR 19 1

```

>mmu-mir-3057

```

ATTGGAGCTGAGATTCTGCGGGATGGATTAGGAGTATATTGCTCCTCCACAGGCCAGCTCATAGCACA species len reads
ATTGGAGCTGAGATTCTGCGGG----- mirL 22 13
ATTGGAGCTGAGATTCTGCGGGA----- mirL 23 11
ATTGGAGCTGAGATTCTGCG----- mirL 19 8

```



```

ACTCTAGCTGCCAAAGGCGCT----- mirL 21 26
ACTCTAGCTGCCAAAGGC----- mirL 18 18
ACTCTAGCTGCCAAAGGCGCTT----- mirL 22 15
-CTCTAGCTGCCAAAGGCGCT----- mirL 20 1
-----AGCGCTTTGCTCAGCCAGTGT----- mirR 21 5
-----GCGCTTTGCTCAGCCAGTGTAG----- mirR 22 2
-----CGCTTTGCTCAGCCAGTGTAG----- mirR 22 2
-----CGCTTTGCTCAGCCAGTGTAGAC----- mirR 23 1
-----CGCTTTGCTCAGCCAGTGTAG----- mirR 21 1
-----AGCGCTTTGCTCAGCCAGTGTAG----- mirR 23 1
-----TAGACATGGCCTGATAAA morR 18 1

```

>mmu-mir-155

```

TTAATGCTAATTGTGATAGGGGTTTTGGCCTCTGACTGACTCTACCTGTTAGCATTAAACAGGACACAAGGCCT species len reads
TTAATGCTAATTGTGATAGGGGTT----- mirL 25 36
TTAATGCTAATTGTGATAGGGGT----- mirL 23 27
TTAATGCTAATTGTGATAGG----- mirL 20 18
TTAATGCTAATTGTGATAGGGTT----- mirL 24 17
TTAATGCTAATTGTGATAGGGG----- mirL 22 16
-TAATGCTAATTGTGATAGGGTT----- mirL 23 15
-TAATGCTAATTGTGATAGGGGTT----- mirL 24 10
-TAATGCTAATTGTGATAGGGGT----- mirL 22 6
-TAATGCTAATTGTGATAGGG----- mirL 20 5
-TAATGCTAATTGTGATAG----- mirL 18 2
-----CTCCTACCTGTTAGCATT----- mirR 19 1
-----TTAACAGGACACAAGGCCT morR 19 1

```

>mmu-mir-184

```

CTTTCCTTATCACTTTTCCAGCCAGCTTTGTGACTCTAAGTGTGGACGGAGAAGGTAAGGGTAGGTGACTGGCACTCCCTG species len reads
-TTTCCTTATCACTTTTCC----- mirL 18 2
---TCCTTATCACTTTTCCAG----- mirL 18 1
CTTTCCTTATCACTTTTCC----- mirL 19 1
-----TGGACGGAGAAGGTAAGGGT----- mirR 22 38
-----TGGACGGAGAAGGTAAGGGTA----- mirR 23 36
-----TGGACGGAGAAGGTAAGGG----- mirR 21 25
-----TGGACGGAGAAGGTAAGG----- mirR 20 18
-----TGGACGGAGAAGGTAAGGGTAG----- mirR 24 10
-----TGGACGGAGAAGGTAAG----- mirR 19 9
-----TGGACGGAGAAGGTAAG----- mirR 18 8
-----TGTGGACGGAGAAGGTA----- mirR 18 1
-----GGACGGAGAAGGTAAGG----- mirR 19 1
-----GGACGGAGAAGGTAAGGGT----- mirR 21 1
-----GGTACTGGCACTCCCTG morR 18 1

```

>mmu-mir-2145-2

```

TCCTCTGATCTCGGAAGCTAAGCAGGGTCGGGCTGGTTAGCACTTGGATGGGAGAAACGTTGAGGCGGGCTAGAGTGCAATTCCAACACTGGCCATTGCTTAGTGTCTGAGTTCCAAGCTCCTCACTTGTGCCTGA

```

```
TCCTCTGATCTCGGAAGCTAAG-----
TCCTCTGATCTCGGAAGCT-----
TCCTCTGATCTCGGAAGCTA-----
TCCTCTGATCTCGGAAGCTAA-----
TCCTCTGATCTCGGAAGC-----
--CTCTGATCTCGGAAGCTAA-----
--CTCTGATCTCGGAAGCTA-----
-CCTCTGATCTCGGAAGCTAA-----
-CCTCTGATCTCGGAAGCTAAG-----
---TCTGATCTCGGAAGCTAAG-----
--CTCTGATCTCGGAAGCTAAG-----
---CTGATCTCGGAAGCTAAG-----
-----AAGCAGGGTCGGGCCTGG-----
-----AGCAGGGTCGGGCCTGGTT-----
-----TAAGCAGGGTCGGGCCTG-----
-----GCAGGGTCGGGCCTGGTT-----
-----TAAGCAGGGTCGGGCCTGG-----
-----AGCAGGGTCGGGCCTGGT-----
-----GCTAAGCAGGGTCGGGCC-----
-----AGCAGGGTCGGGCCTGGTTAGC-----
-----GCAGGGTCGGGCCTGGTTA-----
-----CTAAGCAGGGTCGGGCCTGG-----
-----AGCAGGGTCGGGCCTGGTTA-----
-----CAGGGTCGGGCCTGGTTA-----
-----TGA
-----TGA
-----A
-----CTGA
```

>mmu-mir-1912

```
AAGCATATTAGTCTCTAGGATGTGCTCATTGCATGGGCTGTGTAGATTTTATTTAATACACAGAACATGCAGTGAGAACTTGATAGAGATTGGA species len reads
AAGCATATTAGTCTCTAGGA----- morL 20 2
---CATATTAGTCTCTAGGAT----- morL 18 1
-AGCATATTAGTCTCTAGG----- morL 18 1
-----TGCTCATTGCATGGGCTGTGT----- mirL 21 82
-----TGCTCATTGCATGGGCTGTGTAG----- mirL 23 32
-----TGCTCATTGCATGGGCTGTGTA----- mirL 22 9
-----TGCTCATTGCATGGGCTGTG----- mirL 20 4
-----GCTCATTGCATGGGCTGTGT----- mirL 20 3
-----TGCTCATTGCATGGGCTG----- mirL 18 2
-----GCTCATTGCATGGGCTGT----- mirL 18 1
-----AACTTGATAGAGATTGGA mirR 18 11
```

>mmu-mir-3069

```
TTGGCAGTCAAGATATTGTTTAGCAGACGGAGCGGTTTCTGTTGGACACTAAGTACTGCCACAAAACC species len reads
TTGGCAGTCAAGATATTGTT----- mirL 20 3
```

```

TTGGCAGTCAAGATATTGTTTA----- mirL 22 3
-TGGCAGTCAAGATATTGT----- mirL 18 2
-TGGCAGTCAAGATATTGTTTA----- mirL 21 1
TTGGCAGTCAAGATATTGTTTAG----- mirL 23 1
TTGGCAGTCAAGATATTGTTTAGC----- mirL 24 1
-TGGCAGTCAAGATATTGTT----- mirL 19 1
-----TTGGACACTAAGTACTGCCACA----- mirR 22 64
-----TTGGACACTAAGTACTGCCAC----- mirR 21 17
-----TTGGACACTAAGTACTGCCACAA----- mirR 23 10
-----TGGACACTAAGTACTGCCACA----- mirR 21 7
-----TTGGACACTAAGTACTGC----- mirR 18 6
-----TTGGACACTAAGTACTGCCA----- mirR 20 4
-----GGACACTAAGTACTGCCAC----- mirR 19 4
-----TTGGACACTAAGTACTGCC----- mirR 19 3
-----TGGACACTAAGTACTGCCACAA----- mirR 22 3
-----GGACACTAAGTACTGCCACAAAACC mirR 25 2
-----TGTTGGACACTAAGTACTG----- mirR 19 2
-----GGACACTAAGTACTGCCACAA----- mirR 21 2
-----GACACTAAGTACTGCCACA----- mirR 19 2
-----TGGACACTAAGTACTGCCACAAA----- mirR 23 2
-----GGACACTAAGTACTGCCACAAA----- mirR 22 1
-----TGTTGGACACTAAGTACTGCC----- mirR 21 1

```

>mmu-mir-1935

```

TTCGAGGCCAGCCTGGTCTACAGAGTGAGTTCCAAGACAGCCAGGGCTACAC species len reads
-TCGAGGCCAGCCTGGTCTACA----- mirR 21 38
TTCGAGGCCAGCCTGGTCTACA----- mirR 22 21
TTCGAGGCCAGCCTGGTCTAC----- mirR 21 12
--CGAGGCCAGCCTGGTCTACA----- mirR 20 9
--CGAGGCCAGCCTGGTCTAC----- mirR 19 8
---GAGGCCAGCCTGGTCTACA----- mirR 19 7
---GAGGCCAGCCTGGTCTACAG----- mirR 20 7
---GAGGCCAGCCTGGTCTACAGAGTG----- mirR 24 6
---GAGGCCAGCCTGGTCTAC----- mirR 18 6
-TCGAGGCCAGCCTGGTCTAC----- mirR 20 6
-TCGAGGCCAGCCTGGTCTACAG----- mirR 22 3
TTCGAGGCCAGCCTGGTCTACAG----- mirR 23 2
---GAGGCCAGCCTGGTCTACAGA----- mirR 21 2
TTCGAGGCCAGCCTGGTCTACAGA----- mirR 24 1
TTCGAGGCCAGCCTGGTCTACAGAGTGAGTTCC----- mirR 33 1
-TCGAGGCCAGCCTGGTCTA----- mirR 19 1
TTCGAGGCCAGCCTGGTCT----- mirR 19 1
-TCGAGGCCAGCCTGGTCTACAGAGT----- mirR 25 1
-TCGAGGCCAGCCTGGTCTACAGA----- mirR 23 1
TTCGAGGCCAGCCTGGTC----- mirR 18 1
--CGAGGCCAGCCTGGTCTACAGA----- mirR 22 1

```

```

-----CAGAGTGAGTTCCAAGACAGCCAGGGCTACAC morR 32 1
-----ACAGAGTGAGTTCCAAGACAGCCAGGGCTACAC morR 33 1
-----ACAGAGTGAGTTCCAAGAC----- morR 19 1
-----TGAGTTCCAAGACAGCCA----- morR 18 1
-----GAGTGAGTTCCAAGACAGC----- morR 19 1

```

>mmu-mir-466g

```

GTCGATGTGTGTTTTCGTGTGTGTGCATGTGGATGTATGTATATGATTTGCATATACAGACACATGCACACACATGCGGCACACACACACACAC species len reads
GTCGATGTGTGTTTTCGTG----- morL 19 1
-TCGATGTGTGTTTTCGTGTGT----- morL 21 1
-----GTGCATGTGGATGTATGTA----- mirL 19 5
-----GTGTGCATGTGGATGTATGT----- mirL 20 3
-----GTGTGCATGTGGATGTATGTAT----- mirL 22 1
-----GTGCATGTGGATGTATGTATAT----- mirL 22 1
-----GTGCATGTGGATGTATGTAT----- mirL 20 1
-----ATACAGACACATGCACACACA----- mirR 21 40
-----ATACAGACACATGCACACAC----- mirR 20 21
-----ATACAGACACATGCACAC----- mirR 18 18
-----ATACAGACACATGCACACA----- mirR 19 10
-----ATACAGACACATGCACACACATGC----- mirR 24 10
-----ATACAGACACATGCACACACAT----- mirR 22 7
-----TATACAGACACATGCACACACA----- mirR 22 2
-----TATACAGACACATGCACACAC----- mirR 21 2
-----CAGACACATGCACACACA----- mirR 18 1
-----TACAGACACATGCACACAC----- mirR 19 1
-----ATACAGACACATGCACACACATG----- mirR 23 1
-----TATACAGACACATGCACAC----- mirR 19 1
-----TATACAGACACATGCACA----- mirR 18 1
-----GCGGCACACACACACACAC----- morR 19 1
-----TGCGGCACACACACACACACAC----- morR 22 1
-----ACATGCGGCACACACACACA----- morR 18 1
-----CGGCACACACACACACACAC----- morR 20 1
-----GGCACACACACACACACA----- morR 18 1

```

>mmu-mir-1953

```

GCCTGGTCTTGGGAAAGTTCTCAGGCTTCTGAGAATTTGCAGGAGCAGAAGGCTGTGAGGTTCCCTCTTCTCCTGGCAGCCC species len reads
GCCTGGTCTTGGGAAAGT----- morL 18 1
-----TCAGGCTTCTGAGAATTT----- mirL 18 2
-----GTTCCCTCTTCTCCTGGCA----- mirR 18 73
-----GTTCCCTCTTCTCCTGGCAG----- mirR 19 15
-----TTCCCTCTTCTCCTGGCAG----- mirR 18 13
-----TTCCCTCTTCTCCTGGCAGC----- mirR 19 7
-----GTTCCCTCTTCTCCTGGCAGC----- mirR 20 3
-----GAGGTTCCCTCTTCTCCTGG----- mirR 19 3
-----TCCCTCTTCTCCTGGCAGC----- mirR 18 1
-----GTTCCCTCTTCTCCTGGCAGCCC----- mirR 22 1

```

```
-----GTTCCCCTCTTCCTGGCAGCC- mirR 21 1
-----AGGTTCCCCTCTTCCTGG----- mirR 18 1
-----GGTCCCCTCTTCCTGGC----- mirR 18 1
-----GAGGTTCCCCTCTTCCTG----- mirR 18 1
-----GAGGTTCCCCTCTTCCTGGCA--- mirR 21 1
-----TTCCCCTCTTCCTGGCAGCC- mirR 20 1
-----TCCCCTCTTCCTGGCAGCCC mirR 20 1
-----TCCCCTCTTCCTGGCAGCC- mirR 19 1
```

>mmu-mir-1947

```
GAGGACGAGCTAGCTGAGTGCTGCAGACACTAAGAGCACTGAGCTAGCTCTCCCTCCATGCCCTGCTCAATCGTGAAGTCCGACGTGTGCCTGACCTCACAGAGTATCAGAGCCCATCA species len read
-AGGACGAGCTAGCTGAGTGC----- mirL 20 2
-AGGACGAGCTAGCTGAGTGCT----- mirL 21 1
GAGGACGAGCTAGCTGAGTGCT----- mirL 22 1
-AGGACGAGCTAGCTGAGT----- mirL 18 1
-----GAGTATCAGAGCCCATCA mirR 18 121
```

>mmu-mir-1927

```
TACCATGTGCATGTAGGTTTCAGATCCCTAGAAACCAGAGTTGCAAGTGGCTGTGAACTGACCTCTGGATGTTAGGGACTGAAC species len reads
TACCATGTGCATGTAGGT----- morL 18 1
-----GATCCCTAGAAACCAGAGTTGC----- mirL 22 19
-----GATCCCTAGAAACCAGAGTTG----- mirL 21 3
-----GATCCCTAGAAACCAGAGTTGCA----- mirL 23 3
-----TCAGATCCCTAGAAACCAGAG----- mirL 21 2
-----ATCCCTAGAAACCAGAGTTGC----- mirL 21 2
-----CCCTAGAAACCAGAGTTGCA----- mirL 20 1
-----GATCCCTAGAAACCAGAG----- mirL 18 1
-----GATCCCTAGAAACCAGAGT----- mirL 19 1
-----GCAAGTGGCTGTGAACTGA----- loop 19 1
-----GACCTCTGGATGTTAGGGACTGA-- mirR 23 41
-----GACCTCTGGATGTTAGGGACT---- mirR 21 12
-----GACCTCTGGATGTTAGGGAC----- mirR 20 10
-----GACCTCTGGATGTTAGGGACTG--- mirR 22 8
-----ACCTCTGGATGTTAGGGACTGA-- mirR 22 5
-----GACCTCTGGATGTTAGGGA----- mirR 19 2
-----ACCTCTGGATGTTAGGGAC----- mirR 19 2
-----GACCTCTGGATGTTAGGG----- mirR 18 2
-----TGACCTCTGGATGTTAGGGACTGA-- mirR 24 1
-----GACCTCTGGATGTTAGGGACTGAAC mirR 25 1
-----TGACCTCTGGATGTTAGGGACT---- mirR 22 1
-----ACCTCTGGATGTTAGGGACT---- mirR 20 1
-----ACCTCTGGATGTTAGGGACTG--- mirR 21 1
-----CTGACCTCTGGATGTTAGG----- mirR 19 1
```

>mmu-mir-450b

```
ATTTTTCAGTATGTTCTGAATACATAACATAAGCGTATTGGGAACATTTTGCATGCATAATTTTGTATCAATATATG species len reads
```

```

---TTTGCAGTATGTTCTGAAT----- mirL 20 2
--TTTTGCAGTATGTTCTGA----- mirL 19 1
ATTTTTGCAGTATGTTCC----- mirL 18 1
--TTTTGCAGTATGTTCTGAATAC----- mirL 23 1
-----ACATAACATAAGCGTATT----- loop 18 1
-----ATTGGGAACATTTTGCATGCAT----- mirR 22 46
-----ATTGGGAACATTTTGCATGC----- mirR 20 21
-----TATTGGGAACATTTTGCATGC----- mirR 21 15
-----ATTGGGAACATTTTGCATG----- mirR 19 11
-----TTGGGAACATTTTGCATGCAT----- mirR 21 5
-----ATTGGGAACATTTTGCATGCATA----- mirR 23 3
-----ATTGGGAACATTTTGCATGCA----- mirR 21 2
-----TTGGGAACATTTTGCATGC----- mirR 19 2
-----TGGGAACATTTTGCATGC----- mirR 18 2
-----TGGGAACATTTTGCATGCAT----- mirR 20 1
-----TATTGGGAACATTTTGCATGCAT----- mirR 23 1
-----TATTGGGAACATTTTGCATGCA----- mirR 22 1
-----TTGGGAACATTTTGCATGCATA----- mirR 22 1
-----TTGGGAACATTTTGCATGCA----- mirR 20 1
-----CGTATTGGGAACATTTT----- mirR 18 1
-----TAATTTTGTATCAATATA-- morR 18 1
-----TAATTTTGTATCAATATATG morR 20 1

```

>mmu-mir-3101

```

CAGCAGGTGGGGTAGGTAGCAGGTACCATTGACTAAAGCTAGTACTATAGGCTTGCTCTAGCTTTGGTGGATGGTCTTTGCTAAGTTCTCTGCCAACCCAGC species len reads
CAGCAGGTGGGGTAGGTA----- morL 18 1
-----GGTACCATTGACTAAAGCTAG----- mirL 21 62
-----GGTACCATTGACTAAAGCTAGT----- mirL 22 19
-----GGTACCATTGACTAAAGCTA----- mirL 20 17
-----GGTACCATTGACTAAAGC----- mirL 18 4
-----GGTACCATTGACTAAAGCT----- mirL 19 3
-----AGGTACCATTGACTAAAGCTAG----- mirL 22 1
-----TACCATTGACTAAAGCTA----- mirL 18 1
-----GTACCATTGACTAAAGCTAG----- mirL 20 1
-----AGCTTTGGTGGATGGTCTTTGC----- mirR 22 4
-----AGCTTTGGTGGATGGTCTTTG----- mirR 21 2
-----CTAGCTTTGGTGGATGGTCTTT----- mirR 22 1
-----AGTTCTCTGCCAACCCAGC morR 19 1

```

>mmu-mir-3076

```

ACACAGGGGAAGCTCAGTGCCAGCCTTTCTCTTAGCCGACTCTGGTCTTCCCTTGCGAGAT species len reads
-CACAGGGGAAGCTCAGTGCCA----- mirL 21 4
--ACAGGGGAAGCTCAGTGCC----- mirL 19 4
-CACAGGGGAAGCTCAGTGCCAGC----- mirL 23 3
-CACAGGGGAAGCTCAGTGC----- mirL 19 3
-CACAGGGGAAGCTCAGTGCCAG----- mirL 22 3

```



```

--ACAGGGGAAGCTCAGTGCCAG----- mirL 21 2
-CACAGGGGAAGCTCAGTGCC----- mirL 20 2
--ACAGGGGAAGCTCAGTGCCA----- mirL 20 2
ACACAGGGGAAGCTCAGT----- mirL 18 2
--ACAGGGGAAGCTCAGTGCCAGC----- mirL 22 2
ACACAGGGGAAGCTCAGTGCCAGCC----- mirL 25 1
----AGGGGAAGCTCAGTGCCA----- mirL 18 1
--ACAGGGGAAGCTCAGTGCCAGCC----- mirL 23 1
-----CGCACTCTGGTCTTCCCTTGC---- mirR 21 18
-----CCGCACTCTGGTCTTCCCTTGC---- mirR 22 16
-----CGCACTCTGGTCTTCCCTTGC--- mirR 22 13
-----CCGCACTCTGGTCTTCCCTTGCAG-- mirR 24 6
-----CACTCTGGTCTTCCCTTGCAGA- mirR 22 5
-----CCGCACTCTGGTCTTCCCTTGC--- mirR 21 5
-----CGCACTCTGGTCTTCCCTTGCAG-- mirR 23 4
-----CCGCACTCTGGTCTTCCCT----- mirR 19 2
-----CGCACTCTGGTCTTCCCTTGCAGA- mirR 24 2
-----CGCACTCTGGTCTTCCCT----- mirR 19 2
-----CACTCTGGTCTTCCCTTGC--- mirR 19 2
-----CACTCTGGTCTTCCCTTGCAG-- mirR 20 2
-----CGCACTCTGGTCTTCCCTTGC--- mirR 20 2
-----CACTCTGGTCTTCCCTTGCAG-- mirR 21 1
-----CCGCACTCTGGTCTTCCCT----- mirR 20 1
-----CCGCACTCTGGTCTTCCCTTGCAGA- mirR 25 1
-----CACTCTGGTCTTCCCTTGCAGAT mirR 23 1
-----CGCACTCTGGTCTTCCCT----- mirR 18 1

```

>mmu-mir-669e

```

CTATATATGGGCAGGTGTGTCTTGTGTGTGCATGTTTCATTTGTGTATATGAATATGAATATACACACACTTACACACTCATGCACACACACACATCCATTTGAATGATATGTGT species len reads
CTATATATGGGCAGGTGT----- morL 18 1
-----TGTCTTGTGTGTGCATGTTTCAT----- mirL 22 51
-----TGTCTTGTGTGTGCATGTTTC----- mirL 20 23
-----GTCTTGTGTGTGCATGTTTCAT----- mirL 21 6
-----TGTCTTGTGTGTGCATGTTCA----- mirL 21 5
-----TGTCTTGTGTGTGCATGTTTCATTT----- mirL 24 4
-----TGTCTTGTGTGTGCATGTT----- mirL 19 3
-----GTCTTGTGTGTGCATGTTTCATT----- mirL 22 2
-----GTCTTGTGTGTGCATGTTTC----- mirL 19 1
-----GTCTTGTGTGTGCATGTT----- mirL 18 1
-----CACACTCATGCACACACACACAC----- mirR 23 7
-----ACACTCATGCACACACACAC----- mirR 20 2
-----ACTCATGCACACACACACAC----- mirR 20 1
-----CACACTCATGCACACACACAC----- mirR 22 1
-----ACACACTCATGCACACACAC----- mirR 20 1
-----ACTCATGCACACACACAC----- mirR 18 1
-----CATTGAATGATATGTGT----- morR 18 1

```

>mmu-mir-3074-1

| Sequence                                                                    | species | len | reads |
|-----------------------------------------------------------------------------|---------|-----|-------|
| TGTTCTGCTGAACTGAGCCAGTGTGTGAAATGAGAAGTATATCAGCTCAGTAGGCACCCGAGGGCGGGTCCAATC | mirL    | 22  | 2     |
| -GTTCTGCTGAACTGAGCCAGT-----                                                 | mirL    | 19  | 1     |
| -GTTCTGCTGAACTGAGCC-----                                                    | mirL    | 23  | 1     |
| ---TCCTGCTGAACTGAGCCAGTGTG-----                                             | mirL    | 21  | 1     |
| TGTTCTGCTGAACTGAGCCA-----                                                   | mirL    | 18  | 1     |
| ---TCCTGCTGAACTGAGCCA-----                                                  | mirL    | 23  | 1     |
| -GTTCTGCTGAACTGAGCCAGTG-----                                                | mirR    | 20  | 26    |
| -----GATATCAGCTCAGTAGGCAC-----                                              | mirR    | 23  | 22    |
| -----GATATCAGCTCAGTAGGCACCCG-----                                           | mirR    | 22  | 15    |
| -----GATATCAGCTCAGTAGGCACCG-----                                            | mirR    | 21  | 13    |
| -----GATATCAGCTCAGTAGGCACC-----                                             | mirR    | 21  | 8     |
| -----TGATATCAGCTCAGTAGGCAC-----                                             | mirR    | 24  | 6     |
| -----GATATCAGCTCAGTAGGCACCGGA-----                                          | mirR    | 19  | 2     |
| -----TGATATCAGCTCAGTAGGC-----                                               | mirR    | 19  | 2     |
| -----GATATCAGCTCAGTAGGCA-----                                               | mirR    | 22  | 2     |
| -----TGATATCAGCTCAGTAGGCACC-----                                            | mirR    | 18  | 2     |
| -----GATATCAGCTCAGTAGGC-----                                                | mirR    | 24  | 1     |
| -----TGATATCAGCTCAGTAGGCACCG-----                                           | mirR    | 23  | 1     |
| -----TGATATCAGCTCAGTAGGCACCG-----                                           | mirR    | 23  | 1     |
| -----CCGGAGGGCGGGTCCAATC-----                                               | morR    | 19  | 1     |

>mmu-mir-3082

| Sequence                                                                                              | species | len | reads |
|-------------------------------------------------------------------------------------------------------|---------|-----|-------|
| TGACATGAGTGCCCTGGTGGACAGAGTGTGTGTGTCTGTGTGGAGACAGGAGTTGCCACACATGGCACTCAACTCTGCAGGATAAATACATGGCAGATATG | morL    | 19  | 1     |
| TGACATGAGTGCCCTGGTG-----                                                                              | mirL    | 22  | 12    |
| -----GACAGAGTGTGTGTGTCTGTGT-----                                                                      | mirL    | 21  | 8     |
| -----CAGAGTGTGTGTGTCTGTGT-----                                                                        | mirL    | 21  | 7     |
| -----ACAGAGTGTGTGTGTCTGTGT-----                                                                       | mirL    | 20  | 5     |
| -----GACAGAGTGTGTGTGTCTGT-----                                                                        | mirL    | 22  | 5     |
| -----ACAGAGTGTGTGTGTCTGTGT-----                                                                       | mirL    | 23  | 4     |
| -----GGACAGAGTGTGTGTGTCTGTGT-----                                                                     | mirL    | 23  | 4     |
| -----ACAGAGTGTGTGTGTCTGTGTGG-----                                                                     | mirL    | 20  | 3     |
| -----CAGAGTGTGTGTGTCTGTGT-----                                                                        | mirL    | 22  | 3     |
| -----CAGAGTGTGTGTGTCTGTGTGG-----                                                                      | mirL    | 18  | 2     |
| -----AGAGTGTGTGTGTCTGTGT-----                                                                         | mirL    | 20  | 2     |
| -----AGAGTGTGTGTGTCTGTGT-----                                                                         | mirL    | 19  | 2     |
| -----AGAGTGTGTGTGTCTGTGT-----                                                                         | mirL    | 19  | 2     |
| -----CAGAGTGTGTGTGTCTGTGT-----                                                                        | mirL    | 24  | 2     |
| -----GGACAGAGTGTGTGTGTCTGTGT-----                                                                     | mirL    | 19  | 2     |
| -----ACAGAGTGTGTGTGTCTGT-----                                                                         | mirL    | 21  | 1     |
| -----GACAGAGTGTGTGTGTCTGTGT-----                                                                      | mirL    | 22  | 1     |
| -----TGGACAGAGTGTGTGTGTCTGT-----                                                                      | mirL    | 24  | 1     |
| -----TGGACAGAGTGTGTGTGTCTGTGT-----                                                                    | mirL    | 24  | 1     |
| -----GACAGAGTGTGTGTGTCTGTGTGG-----                                                                    | mirL    | 24  | 1     |
| -----TGGACAGAGTGTGTGTGTCTGTGT-----                                                                    | mirL    | 25  | 1     |

```

-----AGAGTGTGTGTGTCTGTGTGG----- mirL 21 1
-----GACAGAGTGTGTGTCTG----- mirL 19 1
-----GTGGACAGAGTGTGTGTCT----- mirL 21 1
-----CAGAGTGTGTGTCTGTGTGGAG----- mirL 24 1
-----TGGAGACAGGAGTTGCCACAC----- loop 22 1
-----CATGGCACTCAACTCTGCAG----- mirR 20 4
-----ACACATGGCACTCAACTC----- mirR 18 4
-----ACATGGCACTCAACTCTGCAGG----- mirR 22 3
-----ACACATGGCACTCAACTCTGC----- mirR 21 3
-----ACATGGCACTCAACTCTGC----- mirR 19 2
-----CACATGGCACTCAACTCTGCA----- mirR 21 2
-----CACATGGCACTCAACTCTGCAG----- mirR 22 2
-----ACACATGGCACTCAACTCTGCA----- mirR 22 2
-----ACACATGGCACTCAACTCTGCAG----- mirR 23 2
-----ACATGGCACTCAACTCTG----- mirR 18 1
-----ACATGGCACTCAACTCTGCAGGAT----- mirR 24 1
-----CATGGCACTCAACTCTGCA----- mirR 19 1
-----ACACATGGCACTCAACTCTG----- mirR 20 1
-----TGGCACTCAACTCTGCAG----- mirR 18 1
-----CACATGGCACTCAACTCTGC----- mirR 20 1
-----ACATGGCACTCAACTCTGCAGGA----- mirR 23 1
-----ACACATGGCACTCAACTCT----- mirR 19 1
-----CATGGCACTCAACTCTGC----- mirR 18 1
-----TAAATACATGGCAGATATG morR 19 1

```

>mmu-mir-3086

```

ACTGCCATCCTACACTTAGATTGTAGGCCCATTTGGAAGGGTTAGCGTCTTGACCCCAATGAGCCTACAGTCTAAGT species len reads
ACTGCCATCCTACACTTAG----- morL 19 1
-----TAGATTGTAGGCCCATTTGGAAG----- mirL 22 6
-----TAGATTGTAGGCCCATTTGGA----- mirL 20 4
-----TAGATTGTAGGCCCATTTGGA----- mirL 21 3
-----TAGATTGTAGGCCCATTTGG----- mirL 19 3
-----TAGATTGTAGGCCCATTTGGAAG----- mirL 23 2
-----AGATTGTAGGCCCATTTGGA----- mirL 19 1
-----AGATTGTAGGCCCATTTGGAAGGG----- mirL 23 1
-----GGGTTAGCGTCTTGACCC----- loop 18 1
-----AAGGGTTAGCGTCTTGACC----- loop 19 1
-----CCCAATGAGCCTACAGTCTAA----- mirR 21 21
-----CCCAATGAGCCTACAGTCTAAG----- mirR 22 19
-----CCCAATGAGCCTACAGTCTA----- mirR 20 13
-----CCCCAATGAGCCTACAGTCTA----- mirR 21 8
-----CCCCAATGAGCCTACAGTCT----- mirR 20 5
-----CCCAATGAGCCTACAGTCT----- mirR 19 5
-----CCCCAATGAGCCTACAGTCTAA----- mirR 22 5
-----CCCAATGAGCCTACAGTCTAAGT----- mirR 23 3
-----CCCCAATGAGCCTACAGTC----- mirR 19 2

```

```

>mmu-mir-1907
TGCCCCCTCCCCCTCCCAGCCCCACTCCCCCTCGCTGTCTCTTGTCTGGCTGATTTTAATTCTCTCCTACCGGGAGCAGCAGAGGATCTGGAGGTGGCTGGACCCGAGGGGCCCGCCCGCCGCTGTGCA species 1
----CCCTCCCCCTCCCAGCCC----- morL 18 2
---CCCCTCCCCCTCCCAGCCCC----- morL 20 2
----CCTCCCCCTCCCAGCCCC----- morL 18 1
TGCCCCCTCCCCCTCCCAGCCCC----- morL 23 1
--CCCCCTCCCCCTCCCAGC----- morL 18 1
---CCCCTCCCCCTCCCAGCCCA----- morL 21 1
-----CCACTCCCCCTCGCTGTC----- mirL 18 1
-----CACTCCCCCTCGCTGTCT----- mirL 18 1
-----GGGCCGCCGCCGCCGCTGC----- mirR 19 9
-----GGCCGCCGCCGCCGCTGCT--- mirR 19 9
-----GGCCGCCGCCGCCGCTGCT--- mirR 18 8
-----GGGGCCGCCGCCGCCGCTGCTG-- mirR 22 7
-----GCCGCCGCCGCCGCTGCT--- mirR 18 7
-----GAGGGGCCGCCGCCGCCGCTG--- mirR 21 7
-----GGGGCCGCCGCCGCCGCTGCT--- mirR 21 6
-----GGGGCCGCCGCCGCCGCTG--- mirR 19 5
-----GGGGCCGCCGCCGCCGCTGCT--- mirR 20 5
-----GGGCCGCCGCCGCCGCTGCT--- mirR 20 4
-----CCGCCGCCGCCGCTGCTG-- mirR 18 4
-----GGGCCGCCGCCGCCGCTG--- mirR 18 4
-----GCCGCCGCCGCCGCTGCTGCTG- mirR 20 3
-----AGGGGCCGCCGCCGCCGCTG--- mirR 20 3
-----GGCCGCCGCCGCCGCTGCTG-- mirR 20 2
-----GGGCCGCCGCCGCCGCTGCTG-- mirR 21 2
-----GGGCCGCCGCCGCCGCTGCTGCTG- mirR 22 2
-----GAGGGGCCGCCGCCGCCGCTG--- mirR 19 2
-----CCGCCGCCGCCGCTGCTGCA mirR 20 1
-----GGGGCCGCCGCCGCCGCTGCTG- mirR 23 1
-----GGGGCCGCCGCCGCCGCT----- mirR 18 1

```

```

>mmu-mir-3105
CTGAGCAGGCTCTGGAGAGCAAGCCCGTAAGCAGCGTAAGTTACTGAGGAACACTGCTTATGAGCT species len reads
CTGAGCAGGCTCTGGAGA----- morL 18 1
-----AGAGCAAGCCCGTAAGCAGCGT--- mirL 22 9
-----AGAGCAAGCCCGTAAGCAGC----- mirL 20 6
-----AGAGCAAGCCCGTAAGCAGCGTAA----- mirL 24 5
-----AGAGCAAGCCCGTAAGCAGCGTA----- mirL 23 4
-----AGAGCAAGCCCGTAAGCAG----- mirL 19 2
-----GAGCAAGCCCGTAAGCAGCGTA----- mirL 22 1
-----AGCAAGCCCGTAAGCAGCGT----- mirL 20 1
-----AGCAAGCCCGTAAGCAGCGTA----- mirL 21 1
-----GAGAGCAAGCCCGTAAGCAGCG----- mirL 22 1
-----TGAGGAACACTGCTTATGAG-- mirR 20 32

```

```

-----TGAGGAACACTGCTTATGA--- mirR 19 24
-----TGAGGAACACTGCTTATG--- mirR 18 9
-----TGAGGAACACTGCTTATGAGC- mirR 21 2
-----TGAGGAACACTGCTTATGAGCT mirR 22 2

```

>mmu-mir-3093

```

CTCTGCGAGCTCGGCTCTGCCGACCCCGCGGAGCTCACACTCGACCTTCCAGAGAAGGGTGTGGACACCGTGGGAGGTTGGGGAGGCCTCGGCCTAGGCTTCT species len reads
CTCTGCGAGCTCGGCTCTGC----- morL 20 3
-----GCACCCCGCGGAGCTCACACTC----- mirL 22 5
-----CGCACCCCGCGGAGCTCACACTCG----- mirL 24 4
-----GCACCCCGCGGAGCTCACACT----- mirL 21 3
-----GCACCCCGCGGAGCTCACA----- mirL 19 2
-----CGCACCCCGCGGAGCTCAC----- mirL 19 1
-----ACCCCGCGGAGCTCACACTCGACCTTCC----- mirL 28 1
-----CGCACCCCGCGGAGCTCACA----- mirL 20 1
-----CCCCGCGGAGCTCACACTCGACC----- mirL 23 1
-----CGCACCCCGCGGAGCTCACACT----- mirL 22 1
-----CGCACCCCGCGGAGCTCACAC----- mirL 21 1
-----GCACCCCGCGGAGCTCAC----- mirL 18 1
-----TGTGGACACCGTGGGAGGTTGG----- mirR 22 45
-----TGTGGACACCGTGGGAGGTTGGG----- mirR 23 15
-----TGTGGACACCGTGGGAGGTTGGGGA----- mirR 25 4
-----TGTGGACACCGTGGGAGGTT----- mirR 20 3
-----TGTGGACACCGTGGGAGGTTG----- mirR 21 2
-----TGTGGACACCGTGGGAGGT----- mirR 19 1
-----GTGGACACCGTGGGAGGTTGGG----- mirR 22 1
-----GGTGTGGACACCGTGGGAGG----- mirR 20 1
-----TGGGAGGCCTCGGCCTA----- morR 18 2
-----GGCCTCGGCCTAGGCTTCT morR 19 1
-----GGGAGGCCTCGGCCTAG----- morR 18 1

```

>mmu-mir-3064

```

GGGAATACAATTGCTAACTTTTTATTTTTGGTCTGGCTGTTGTGGTGTGCAAAACTCCGTACATTGCTATTTTGCCACACTGCAACACCTTACAGATGTGGAAGATGTGA species len reads
-----ACTTTTTATTTTTGGTCT----- morL 18 1
-----TTGTCTAACTTTTTATTTTT----- morL 20 1
-----TTGTCTAACTTTTTATTTTTGGTCT----- morL 24 1
GGGAATACAATTGCTAACTTTTTATTTTTGGTCT----- morL 34 1
-----TCTGGCTGTTGTGGTGTGC----- mirL 19 5
-----TCTGGCTGTTGTGGTGTGCAA----- mirL 21 4
-----TCTGGCTGTTGTGGTGTGCA----- mirL 20 3
-----TGGCTGTTGTGGTGTGCAAAACTCC----- mirL 25 3
-----GGCTGTTGTGGTGTGCAAAAC----- mirL 21 2
-----TCTGGCTGTTGTGGTGTGCAA----- mirL 22 2
-----CTGGCTGTTGTGGTGTGCAAAAC----- mirL 23 1
-----GTCTGGCTGTTGTGGTGTGCAA----- mirL 23 1
-----GGTCTGGCTGTTGTGGTGTG----- mirL 20 1

```

```

-----CTGGCTGTTGGTGTGCAAACTCC----- mirL 26 1
-----TGGCTGTTGGTGTGCAAACTCCGTAC----- mirL 29 1
-----GTCTGGCTGTTGGTGTG----- mirL 19 1
-----TGGCTGTTGGTGTGCAAA----- mirL 20 1
-----CTGGCTGTTGGTGTGCAA----- mirL 20 1
-----TTGCCACACTGCAACACCTTAC----- mirR 22 17
-----TGCCACACTGCAACACCTTAC----- mirR 21 15
-----TTTGCCACACTGCAACACCTTAC----- mirR 23 11
-----TTTGCCACACTGCAACACC----- mirR 19 4
-----TGCCACACTGCAACACCTTACA----- mirR 22 3
-----TTTGCCACACTGCAACACCTTA----- mirR 22 2
-----TTGCCACACTGCAACACCTTA----- mirR 21 2
-----TGCCACACTGCAACACCTTACAG----- mirR 23 2
-----TGCCACACTGCAACACCTTA----- mirR 20 1
-----TTTGCCACACTGCAACACCTT----- mirR 21 1
-----TGCCACACTGCAACACCTT----- mirR 19 1
-----TTGCCACACTGCAACACCTTACA----- mirR 23 1
-----ATTTTGCCACACTGCAAC----- mirR 18 1
-----TTTGCCACACTGCAACACCTTACA----- mirR 24 1
-----TGCCACACTGCAACACCT----- mirR 18 1
-----ACAGATGTGGAAGATGTGA morR 19 1

```

>mmu-mir-466f-2

```

ACGTGTGTGTGCATGTGCATGTGTATATGAATATATGTATACATACACACACATACACACTCATGTAACACACACACACACACACAC species len reads
ACGTGTGTGTGCATGTGCATGT----- mirL 22 5
ACGTGTGTGTGCATGTGCAT----- mirL 20 4
ACGTGTGTGTGCATGTGCATG----- mirL 21 3
ACGTGTGTGTGCATGTGCA----- mirL 19 2
ACGTGTGTGTGCATGTGC----- mirL 18 2
-----ATACACACACATACACTC----- mirR 22 37
-----ACACACACATACACTCA----- mirR 21 10
-----CATACACACATACACTC----- mirR 23 6
-----TACACACACATACACTCA----- mirR 22 3
-----CACACACATACACTCA----- mirR 20 3
-----TACACACACATACACTC----- mirR 21 3
-----ACACACACATACACTC----- mirR 20 2
-----CATACACACATACACT----- mirR 22 1
-----TACACACACATACACTCAT----- mirR 23 1
-----CATACACACATACACAC----- mirR 21 1
-----CACACACATACACTC----- mirR 19 1
-----TACATACACACATACAC----- mirR 21 1
-----ACATACACACATACAC----- mirR 19 1
-----TACATACACACATACACA----- mirR 22 1
-----TAACACACACACACACACAC morR 24 2
-----GTAACACACACACACACACAC-- morR 23 1
-----ATGTAACACACACACACACAC--- morR 23 1

```

```
-----TAACACACACACACACACACA--- morR 21 1
-----ATGTAACACACACACACACAC----- morR 21 1
-----TAACACACACACACACAC----- morR 18 1
-----ATGTAACACACACACACACACACAC morR 27 1
```

>mmu-mir-802

```
ATCAGTAACAAAGATTCATCCTTGTGTCAATCATAACAACACGGAGAGTCTTTGTCACCTCAGT species len reads
-TCAGTAACAAAGATTCATCCTT----- mirL 22 44
-TCAGTAACAAAGATTCATCCT----- mirL 21 11
-TCAGTAACAAAGATTCATCCTTG----- mirL 23 9
-TCAGTAACAAAGATTCATCC----- mirL 20 6
--CAGTAACAAAGATTCATCCTTGT----- mirL 23 3
--CAGTAACAAAGATTCATC----- mirL 18 2
--CAGTAACAAAGATTCATCCTTG----- mirL 22 2
--CAGTAACAAAGATTCATCCTT----- mirL 21 1
ATCAGTAACAAAGATTCATCCT----- mirL 22 1
--CAGTAACAAAGATTCATCCT----- mirL 20 1
-----TGCAATCATAACAACACG----- loop 18 1
-----ACGGAGAGTCTTTGTCACCTCAGT mirR 23 3
-----ACGGAGAGTCTTTGTCACCTC--- mirR 20 3
-----CGGAGAGTCTTTGTCACCTCAGT mirR 22 1
-----CGGAGAGTCTTTGTCACCTCA-- mirR 20 1
-----ACGGAGAGTCTTTGTCACCTCAG- mirR 22 1
-----ACGGAGAGTCTTTGTCACCTCA-- mirR 21 1
```

>mmu-mir-196a-1

```
GGGACTGTTGAGTGAAGTAGGTAGTTTCATGTTGTTGGCCCTGGCTTTCTGAACACAACGACATCAAACCACCTGATTATGGCAGTTACTGCTTCTTGCTTAGCTGGGGGAGTTCGGTAGGGTTCCTCAGGACTGGCG s
GGGACTGTTGAGTGAAGTAGG----- m
-----GTAGTTTCATGTTGTTGG----- m
-----AGGTAGTTTCATGTTGTTGG----- m
-----GGTAGTTTCATGTTGTTGG----- m
-----AGGTAGTTTCATGTTGTT----- m
-----GTAGTTTCATGTTGTTGGG----- m
-----GGTAGTTTCATGTTGTTGGG----- m
-----TAGTTTCATGTTGTTGGG----- m
-----AGGTAGTTTCATGTTGTTG----- m
-----AGGTAGTTTCATGTTGTTGGG----- m
-----TAGGTAGTTTCATGTTGTTGGG----- m
-----GTAGTTTCATGTTGTTGGGC----- m
-----AGGTAGTTTCATGTTGTTGGCCCTG----- m
-----TAGGTAGTTTCATGTTGTT----- m
-----TAGGGTTCCTCAGGACTGGC----- m
-----TAGGGTTCCTCAGGACTG----- m
-----TAGGGTTCCTCAGGACTGGCG----- m
-----TAGGGTTCCTCAGGACTGG----- m
```

>mmu-mir-147

| AAAGAACACTCTATGAATCTAGTGAAACATTTCTGCACAACTAGATGTTGATGCCAGTGTGCGGAAATGCTTCTGCTACATTTGTAGGGTTTGCCCT | species | len | reads |
|---------------------------------------------------------------------------------------------------|---------|-----|-------|
| AAAGAACACTCTATGAATC-----                                                                          | morL    | 19  | 1     |
| -----TGGAAACATTTCTGCACAAAC-----                                                                   | mirL    | 21  | 2     |
| -----TGGAAACATTTCTGCACAA-----                                                                     | mirL    | 19  | 1     |
| -----TGGAAACATTTCTGCACAAACT-----                                                                  | mirL    | 22  | 1     |
| -----GTGTGCGGAAATGCTTCTGCTAC-----                                                                 | mirR    | 23  | 28    |
| -----GTGTGCGGAAATGCTTCTGCT-----                                                                   | mirR    | 21  | 14    |
| -----GTGTGCGGAAATGCTTCTGC-----                                                                    | mirR    | 20  | 12    |
| -----GTGTGCGGAAATGCTTCTGCTA-----                                                                  | mirR    | 22  | 11    |
| -----GTGTGCGGAAATGCTTCT-----                                                                      | mirR    | 18  | 4     |
| -----GTGTGCGGAAATGCTTCTGCTACA-----                                                                | mirR    | 24  | 3     |
| -----AGTGTGCGGAAATGCTTCTGC-----                                                                   | mirR    | 21  | 1     |
| -----AGTGTGCGGAAATGCTTCTGCTA-----                                                                 | mirR    | 23  | 1     |
| -----AGTGTGCGGAAATGCTTCT-----                                                                     | mirR    | 19  | 1     |
| -----AGTGTGCGGAAATGCTTCTGCTACA-----                                                               | mirR    | 25  | 1     |
| -----ACATTTGTAGGGTTTGCC-----                                                                      | morR    | 18  | 6     |
| -----ACATTTGTAGGGTTTGCCCT-----                                                                    | morR    | 19  | 3     |

>mmu-mir-466i

| ATTATGTATGTATGTGTGTGTGTGTGTGTATATATATACACACACATACACTACATGTATGCAACATATATACTACATATATATATTTAGTGC | species | len | reads |
|-----------------------------------------------------------------------------------------------|---------|-----|-------|
| --TATGTATGTATGTGTGTGT-----                                                                    | mirL    | 19  | 3     |
| --TATGTATGTATGTGTGTGTGT-----                                                                  | mirL    | 22  | 2     |
| ---ATGTATGTATGTGTGTGTGT-----                                                                  | mirL    | 21  | 1     |
| ---ATGTATGTATGTGTGTGTGT-----                                                                  | mirL    | 19  | 1     |
| ---ATGTATGTATGTGTGTGTGTGTGT-----                                                              | mirL    | 33  | 1     |
| --TATGTATGTATGTGTGTGTGT-----                                                                  | mirL    | 20  | 1     |
| ---TGTATGTATGTGTGTGTGTGTGT-----                                                               | mirL    | 23  | 1     |
| --TATGTATGTATGTGTGTGTGT-----                                                                  | mirL    | 21  | 1     |
| --TATGTATGTATGTGTGTGT-----                                                                    | mirL    | 18  | 1     |
| ATTATGTATGTATGTGTGTGTGTGTGT-----                                                              | mirL    | 35  | 1     |
| ---TGTATGTATGTGTGTGTGT-----                                                                   | mirL    | 20  | 1     |
| -----TATACTACATATATATATTTAG---                                                                | mirR    | 22  | 31    |
| -----TATACTACATATATATATTTA---                                                                 | mirR    | 21  | 10    |
| -----TATACTACATATATATATTT-----                                                                | mirR    | 20  | 8     |
| -----ATACTACATATATATATTT-----                                                                 | mirR    | 19  | 6     |
| -----ATACTACATATATATATTTAG---                                                                 | mirR    | 21  | 6     |
| -----ATACTACATATATATATTTA---                                                                  | mirR    | 20  | 5     |
| -----ATACTACATATATATATTT-----                                                                 | mirR    | 18  | 3     |
| -----TATACTACATATATATATTT-----                                                                | mirR    | 19  | 2     |
| -----ATACTACATATATATATTTAGTGC                                                                 | mirR    | 24  | 1     |
| -----TATACTACATATATATAT-----                                                                  | mirR    | 18  | 1     |
| -----ATATATACTACATATATATA-----                                                                | mirR    | 20  | 1     |

>mmu-mir-217

| ATACTGCATCAGGAAGTACTGGATAAGACTTAATCCCCATCAGTTCCTAATGCATTGCCTT | species | len | reads |
|---------------------------------------------------------------|---------|-----|-------|
|---------------------------------------------------------------|---------|-----|-------|



```

-TACTGCATCAGGAACTGACTGG----- mirL 22 16
A TACTGCATCAGGAACTGACTG----- mirL 22 9
--ACTGCATCAGGAACTGACTGG----- mirL 21 7
-TACTGCATCAGGAACTGACT----- mirL 20 7
A TACTGCATCAGGAACTGACT----- mirL 21 5
-TACTGCATCAGGAACTGAC----- mirL 19 5
A TACTGCATCAGGAACTGACTGG----- mirL 23 3
-TACTGCATCAGGAACTGACTGGA----- mirL 23 3
-TACTGCATCAGGAACTGACTG----- mirL 21 2
---CTGCATCAGGAACTGACTGG----- mirL 20 1
--ACTGCATCAGGAACTGACT----- mirL 19 1
A TACTGCATCAGGAACTGACTGGAT----- mirL 25 1
A TACTGCATCAGGAACTG----- mirL 18 1
--ACTGCATCAGGAACTGACTGGA----- mirL 22 1
-----ATAAGACTTAATCCCCATC----- loop 19 1
-----GATAAGACTTAATCCCCA----- loop 18 1
-----ATCAGTTCCTAATGCATTGCCT----- mirR 22 12
-----ATCAGTTCCTAATGCATTGCC----- mirR 21 2
-----CATCAGTTCCTAATGCAT----- mirR 18 2
-----ATCAGTTCCTAATGCATTGCCT----- mirR 23 2
-----ATCAGTTCCTAATGCATTG----- mirR 19 2
-----CATCAGTTCCTAATGCATTGCC----- mirR 22 1
-----CCCATCAGTTCCTAATGCATTGC----- mirR 23 1
-----CCCATCAGTTCCTAATGC----- mirR 18 1

```

>mmu-mir-669h

```

AATATGCATGGGTGTATAGTTGAGTGCATATTCATTTCTCTATATGAATATGCATATACACACATGCACACACACACTCACACAC species len reads
---ATGCATGGGTGTATAGTTGAGTGC----- mirL 24 29
---ATGCATGGGTGTATAGTTGA----- mirL 20 6
--TATGCATGGGTGTATAGTTGAGTGC----- mirL 25 5
---ATGCATGGGTGTATAGTTGAGT----- mirL 22 5
---ATGCATGGGTGTATAGTTGAGTGCAT----- mirL 26 4
--TATGCATGGGTGTATAGTTGAGT----- mirL 23 3
---ATGCATGGGTGTATAGTTGAG----- mirL 21 3
--TATGCATGGGTGTATAGTTGA----- mirL 21 2
--TATGCATGGGTGTATAGTTG----- mirL 20 2
--TATGCATGGGTGTATAGTTGAGTG----- mirL 24 2
AATATGCATGGGTGTATAGTTG----- mirL 22 1
-----GCACACACACACACTCACACAC----- mirR 24 6
-----CACACACACACACTCACAC----- mirR 21 4
-----ACACACACACACTCAC----- mirR 18 2
-----TGCACACACACACT----- mirR 18 2
-----ACACACACACACTCACAC----- mirR 20 2
-----GCACACACACACTCA----- mirR 19 1
-----CACACACACACTCACAC----- mirR 21 1
-----TGCACACACACACTCACAC----- mirR 23 1

```

```
-----GCACACACACACACTCACAC-- mirR 22 1
-----ACACACACACACACTCACACAC mirR 22 1
-----TGCACACACACACACTCACA--- mirR 22 1
-----CACACACACACACTCACAC-- mirR 19 1

>mmu-mir-3470b
TGTGTAGCCTTGGCTGTCCCTGGCACTCACTCTGTAGACCAGGCTGGCCTTGAACCAAAAATTCACCTGCCTCTGCCTCCCGAGTGCTGGGACTAAAGGCATGCGCTACCAATGCCCGAGAACCAAAACCTTCTAATTCACG
-GTGTAGCCTTGGCTGTCCCTGGC-----
--GTAGCCTTGGCTGTCCCTGGCA-----
TGTGTAGCCTTGGCTGTCCCTGGC-----
----AGCCTTGGCTGTCCCTGGCACTC-----
---GTAGCCTTGGCTGTCCCTGGCACTC-----
-----GGCTGTCCCTGGCACTCAC-----
-----GCCTTGGCTGTCCCTGGCACTCAC-----
-----TTGGCTGTCCCTGGCACTC-----
---AGCCTTGGCTGTCCCTGGCAC-----
--TGTAGCCTTGGCTGTCCCTGGC-----
---CTTGGCTGTCCCTGGCACTCAC-----
---TAGCCTTGGCTGTCCCTGGCACT-----
-----CACTCTGTAGACCAGGCT-----
-----TCACTCTGTAGACCAGGCTGGC-----
-----ACTCACTCTGTAGACCAGGCTGGCC-----
-----CTCTGTAGACCAGGCTGGCCTTG-----
-----CTCTGTAGACCAGGCTGGCCT-----
-----TCACTCTGTAGACCAGGCTGGCC-----
-----TCTGTAGACCAGGCTGGC-----
-----ACTCACTCTGTAGACCAGGCT-----
-----CTCACTCTGTAGACCAGGCTGGC-----
-----CTCACTCTGTAGACCAGGCTGGCC-----
-----CTCACTCTGTAGACCAGGCTGGCCTTGAAC-----
-----ACTCACTCTGTAGACCAGGCTGGCCTTGAAC-----
-----CTCACTCTGTAGACCAGGCT-----
-----ACTCTGTAGACCAGGCTGGCCTTGA-----
-----ACTCTGTAGACCAGGCTGGCCTTG-----
-----CTCACTCTGTAGACCAGG-----
-----ACTCACTCTGTAGACCAGGCT-----
-----CTCACTCTGTAGACCAGGCT-----
-----TCACTCTGTAGACCAGGCTGGCCTTGAAC-----
-----ACTCACTCTGTAGACCAGG-----
-----ACTCTGTAGACCAGGCTGGCC-----
-----CTCTGTAGACCAGGCTGG-----
-----TCACTCTGTAGACCAGGCTG-----
-----CTCTGTAGACCAGGCTGGCC-----
-----CACTCTGTAGACCAGGCTGGCCTTGAAC-----
-----CACTCTGTAGACCAGGCTGGCC-----
-----
-----TAATTCACG
-----AATTCACG
```

-----TAATTCACG  
-----TAATTCACG

>mmu-mir-3062

```
CAGGGAGAATGTAGTGTACCGTGAGCCTGTGTCAGCAAATACCACTCACGGGGACACACTTTCTCCT species len reads
---GGAGAATGTAGTGTACCGTGA----- mirL 22 40
---GGAGAATGTAGTGTACCGTG----- mirL 21 10
---GGAGAATGTAGTGTACCGTGAG----- mirL 23 5
---GGAGAATGTAGTGTACCGT----- mirL 20 4
---GGAGAATGTAGTGTACCGTGAGC----- mirL 24 3
---GGGAGAATGTAGTGTACCGTG----- mirL 22 2
CAGGGAGAATGTAGTGTACCGTGA----- mirL 25 1
---GGGAGAATGTAGTGTACCGTGA----- mirL 23 1
-----CACGGGGACACACTTTCTCCT mirR 21 3
-----ACGGGGACACACTTTCTCCT mirR 20 3
-----CGGGGACACACTTTCTCCT mirR 19 2
-----CGGGGACACACTTTCTCC- mirR 18 1
-----CACGGGGACACACTTTCTCC- mirR 20 1
```

>mmu-mir-344g

```
CACATAGAATTTCTGCCAGTCAGGCTCCTGGCAGGAGTCTGCTCTCAGCTGGTTCCAGGCTCTAGCCAGGGGCTTGACTGCAAGCTGCTCATCGAGAAGG species len reads
CACATAGAATTTCTGCCA----- morL 18 1
-----AGTCAGGCTCCTGGCAGGAGT----- mirL 21 3
-----CCAGTCAGGCTCCTGGCA----- mirL 18 2
-----AGTCAGGCTCCTGGCAGGA----- mirL 19 1
-----TAGCCAGGGGCTTGACTGC----- mirR 19 12
-----TAGCCAGGGGCTTGACTGCAA----- mirR 21 10
-----CTCTAGCCAGGGGCTTGACTGC----- mirR 22 8
-----TAGCCAGGGGCTTGACTGCAAGC----- mirR 23 8
-----CTCTAGCCAGGGGCTTGACTG----- mirR 21 4
-----CTCTAGCCAGGGGCTTGACTGCAA----- mirR 24 4
-----TCTAGCCAGGGGCTTGACTGC----- mirR 21 3
-----TAGCCAGGGGCTTGACTG----- mirR 18 2
-----AGCCAGGGGCTTGACTGCA----- mirR 19 2
-----CTCTAGCCAGGGGCTTGAC----- mirR 19 2
-----CTAGCCAGGGGCTTGACTGC----- mirR 20 2
-----CTAGCCAGGGGCTTGACTGCAA----- mirR 22 2
-----TAGCCAGGGGCTTGACTGCAAG----- mirR 22 2
-----AGCCAGGGGCTTGACTGCAAG----- mirR 21 1
-----CTAGCCAGGGGCTTGACTGCA----- mirR 21 1
-----AGCCAGGGGCTTGACTGCAA----- mirR 20 1
-----TCTAGCCAGGGGCTTGACTG----- mirR 20 1
-----CTCTAGCCAGGGGCTTGACTGCA----- mirR 23 1
-----CTAGCCAGGGGCTTGACTG----- mirR 19 1
-----AGCCAGGGGCTTGACTGCAAGC----- mirR 22 1
-----AGCTGCTCATCGAGAAGG morR 18 1
```

>mmu-mir-466f-3

|                                                                                                        | species | len | reads |
|--------------------------------------------------------------------------------------------------------|---------|-----|-------|
| TGTATGTGCATGTGTGTTTACGTGTGTGCATGTGCATGTGTGTATATGAATATATGTATACATACACACACATACACACGCACGCAACACACACACACACAC | morL    | 21  | 4     |
| TGTATGTGCATGTGTGTTTAC-----                                                                             | morL    | 20  | 1     |
| --TATGTGCATGTGTGTTTACG-----                                                                            | morL    | 18  | 1     |
| ---ATGTGCATGTGTGTTTAC-----                                                                             | morL    | 21  | 1     |
| -GTATGTGCATGTGTGTTTACG-----                                                                            | mirL    | 22  | 5     |
| -----ACGTGTGTGTGCATGTGCATGT-----                                                                       | mirL    | 20  | 4     |
| -----ACGTGTGTGTGCATGTGCAT-----                                                                         | mirL    | 21  | 3     |
| -----ACGTGTGTGTGCATGTGCATG-----                                                                        | mirL    | 19  | 2     |
| -----ACGTGTGTGTGCATGTGCA-----                                                                          | mirL    | 18  | 2     |
| -----ACGTGTGTGTGCATGTGC-----                                                                           | mirR    | 22  | 18    |
| -----ATACACACACATACACACGC-----                                                                         | mirR    | 21  | 9     |
| -----CACACACACATACACACGCAC-----                                                                        | mirR    | 19  | 4     |
| -----CACACACACATACACACGC-----                                                                          | mirR    | 20  | 3     |
| -----ACACACACACATACACACGC-----                                                                         | mirR    | 21  | 3     |
| -----ATACACACACATACACACG-----                                                                          | mirR    | 20  | 2     |
| -----CACACACACATACACACGCA-----                                                                         | mirR    | 22  | 1     |
| -----CATAACACACACATACACACG-----                                                                        | mirR    | 21  | 1     |
| -----TACACACACACATACACACGC-----                                                                        | mirR    | 21  | 1     |
| -----CATAACACACACATACACAC-----                                                                         | mirR    | 21  | 1     |
| -----TACATACACACACATACAC-----                                                                          | mirR    | 22  | 1     |
| -----CACACACACATACACACGCACG-----                                                                       | mirR    | 21  | 1     |
| -----ACACACACACATACACACGCA-----                                                                        | mirR    | 23  | 1     |
| -----CATAACACACACATACACACGC-----                                                                       | mirR    | 19  | 1     |
| -----ACATACACACACACATACA-----                                                                          | mirR    | 22  | 1     |
| -----TACATACACACACATACACA-----                                                                         | morR    | 24  | 1     |
| -----CACGCAACACACACACACACAC-----                                                                       | morR    | 20  | 1     |
| -----CGCAACACACACACACACAC-----                                                                         | morR    | 18  | 1     |
| -----CAACACACACACACACAC-----                                                                           | morR    | 24  | 1     |
| -----CGCACGCAACACACACACACAC-----                                                                       |         |     |       |

>mmu-mir-196a-2

|                                                                                                                           | species | len | reads |
|---------------------------------------------------------------------------------------------------------------------------|---------|-----|-------|
| TAGGTAGTTTCATGTTGTTGGGATTGAGTTTTGAACTCGGCAACAAGAAACTGCCTGAGTTACATCAGTCGGTTTTTCGTCGAGGGCCCCAATCCACCTCCCTTAACCCTTCCTTCCCTTG | mirL    | 18  | 16    |
| ---GTAGTTTCATGTTGTTGG-----                                                                                                | mirL    | 20  | 14    |
| -AGGTAGTTTCATGTTGTTGG-----                                                                                                | mirL    | 19  | 9     |
| --GGTAGTTTCATGTTGTTGG-----                                                                                                | mirL    | 18  | 8     |
| -AGGTAGTTTCATGTTGTT-----                                                                                                  | mirL    | 20  | 5     |
| --GGTAGTTTCATGTTGTTGGG-----                                                                                               | mirL    | 19  | 5     |
| ---GTAGTTTCATGTTGTTGGG-----                                                                                               | mirL    | 18  | 3     |
| ---TAGTTTCATGTTGTTGGG-----                                                                                                | mirL    | 21  | 2     |
| -AGGTAGTTTCATGTTGTTGGG-----                                                                                               | mirL    | 22  | 2     |
| TAGGTAGTTTCATGTTGTTGGG-----                                                                                               | mirL    | 19  | 2     |
| -AGGTAGTTTCATGTTGTTG-----                                                                                                 | mirL    | 19  | 1     |
| TAGGTAGTTTCATGTTGTT-----                                                                                                  | mirR    | 20  | 2     |
| -----CCCTAACCCTTCCTTCCCTT-----                                                                                            |         |     |       |

```
-----CCCTAACCCCTTCCTTCCCTTG mirR 21 1
-----TCCCTAACCCCTTCCTTC----- mirR 18 1
-----TAACCCTTCCTTCCCTTG mirR 18 1
```

>mmu-mir-467c

```
CCCCTATGCATGTGCCTTTGTGCATAAGTGCCTGCATGTATATGTGTATATTTTATGCATATACATACACACACCTATACACACATGCACACAGACA species len reads
CCCCTATGCATGTGCCTTTGT----- morL 21 1
--CCTATGCATGTGCCTTTGT----- morL 18 1
--CCCTATGCATGTGCCTTTGTG----- morL 21 1
-----ATAAGTGCCTGCATGTATATGT----- mirL 22 17
-----TAAGTGCCTGCATGTATATGT----- mirL 21 13
-----ATAAGTGCCTGCATGTATAT----- mirL 20 9
-----TAAGTGCCTGCATGTATATGTGT----- mirL 23 5
-----TAAGTGCCTGCATGTATATATG----- mirL 20 4
-----TAAGTGCCTGCATGTATATGTGTG----- mirL 24 3
-----AAGTGCCTGCATGTATATGTG----- mirL 21 3
-----TAAGTGCCTGCATGTATATGTG----- mirL 22 2
-----ATAAGTGCCTGCATGTATATATG----- mirL 21 2
-----AGTGCCTGCATGTATATGTG----- mirL 20 1
-----GCATAAGTGCCTGCATGTATA----- mirL 21 1
-----AAGTGCCTGCATGTATATGT----- mirL 20 1
-----ATAAGTGCCTGCATGTATATGTG----- mirL 23 1
-----ATAAGTGCCTGCATGTAT----- mirL 18 1
-----TACACACATGCACACAGAC----- mirR 19 2
-----ATACACACATGCACACAGAC----- mirR 20 1
-----ATACACACATGCACACAGACA----- mirR 21 1
```

>mmu-mir-1930

```
TCACCTCCATAGTACCTGCAGCGTGTACTTTCTCTATGGTGCAGTTACTGTGGCTGTGGCTGTGTTTCGTGCCTCAGACTGAA species len reads
--ACCTCCATAGTACCTGCAGCGT----- mirL 22 26
--ACCTCCATAGTACCTGCAGCGTG----- mirL 23 10
--ACCTCCATAGTACCTGCAGCG----- mirL 21 10
--ACCTCCATAGTACCTGCAG----- mirL 19 8
--ACCTCCATAGTACCTGCAGC----- mirL 20 6
TCACCTCCATAGTACCTGCAG----- mirL 20 1
-----TGCTTGACTTTCTCTATG----- loop 18 1
-----GGTGCAGTTACTGTGGCTGTGG----- mirR 22 2
-----GGTGCAGTTACTGTGGCTGTG----- mirR 21 1
-----GGTGCAGTTACTGTGGCTGT----- mirR 20 1
-----TGCAGTTACTGTGGCTGTGGC----- mirR 21 1
-----TGGCTGTGTTTCGTGCCTCA----- morR 19 1
-----TGGCTGTGTTTCGTGCCTC----- morR 18 1
-----TGTTTCGTGCCTCAGACTGAA----- morR 20 1
```

>mmu-mir-3471-1

```
GCCTCCATGAGATCCAAGTGAAGGCATTTCTCAATTAGTGTGTTATGCTGTAGTGTATGCTCTGTCCAGTTTCTTTTGGAGGTATTTAGAGCTATG species len reads
```

```

---TCCATGAGATCCAACCTGT----- mirL 18 3
GCCTCCATGAGATCCAACCT----- mirL 19 1
---TCCATGAGATCCAACCTGTAAGGC----- mirL 23 1
-----GTCCAGTTTCTTTTGGAG----- mirR 18 30
-----GTCCAGTTTCTTTTGGAG----- mirR 19 30
-----TGCCAGTTTCTTTTGGAG----- mirR 19 1
-----TCCAGTTTCTTTTGGAG----- mirR 18 1
-----GTCCAGTTTCTTTTGGAG----- mirR 20 1
-----GAGGTATTTAGAGCTATG morR 18 1

```

>mmu-mir-466d

```

TATACATACACGCACACATAGATACGCACGCACACACACACAG species len reads
TATACATACACGCACACATAG----- mirR 21 23
TATACATACACGCACACATAGA----- mirR 22 18
-ATACATACACGCACACATAG----- mirR 20 11
-ATACATACACGCACACATAGA----- mirR 21 9
---ACATACACGCACACATAG----- mirR 18 2
-ATACATACACGCACACATAGATAC----- mirR 24 1
TATACATACACGCACACATAGAT----- mirR 23 1
---ACATACACGCACACATAGA----- mirR 19 1
-----GATACGCACGCACACACAC----- morR 19 1
-----TACGCACGCACACACACACAG morR 23 1
-----GATACGCACGCACACACACAC----- morR 21 1

```

>mmu-mir-466k

```

GTGTACATGTACATGTGAGTATGTGTGTGTATATGTTTGTACATGTGCATGTGTGTGAGTATGTGAATATATGTGTATATGTGTGCATGTGCA species len reads
-TGTACATGTACATGTGAGTATG----- mirL 22 46
-TGTACATGTACATGTGAGTA----- mirL 20 4
-TGTACATGTACATGTGAG----- mirL 18 4
--GTACATGTACATGTGAGTATG----- mirL 21 3
-TGTACATGTACATGTGAGTAT----- mirL 21 2
--GTACATGTACATGTGAGTA----- mirL 19 1
---ACATGTACATGTGAGTATGT----- mirL 20 1
-TGTACATGTACATGTGAGTATGTGT----- mirL 25 1
GTGTACATGTACATGTGAGT----- mirL 20 1
--GTACATGTACATGTGAGTATGT----- mirL 22 1
-----GTATGTGAATATATGTGT----- mirR 18 3
-----TGTATATGTGTGCATGTGCA morR 20 1

```

>mmu-mir-1903

```

CTCGCAACTCCTCCCCTCTTTTTTTTCTCCTCTTCTTCTTCTCCTGAGACATGGCCCGGGCAGTGGCTCCTGGAAGAGGAACAAGTGGGAAAAGGGAG species len reads
CTCGCAACTCCTCCCCTCTTT----- morL 21 4
CTCGCAACTCCTCCCCTCTTT----- morL 22 2
CTCGCAACTCCTCCCCTCT----- morL 19 2
-----ACTCCTCCCCTCTTTTT----- morL 18 1
CTCGCAACTCCTCCCCTC----- morL 18 1

```

```

-----TTTTTCCTCCTTCTTCTT----- mirL 18 11
-----TTTTTCCTCCTTCTTCTT----- mirL 19 7
-----TTTTTTTCCTCCTTCTTC----- mirL 18 4
-----TTTTTTTCCTCCTTCTTCT----- mirL 19 3
-----TTTTTTTCCTCCTTCTTCTT----- mirL 20 3
-----TTTTTTTCCTCCTTCTTCT----- mirL 18 3
-----TTCCTCCTTCTTCTTCTTCC----- mirL 20 2
-----TTTTTCCTCCTTCTTCTTCTT----- mirL 21 1
-----TTTTCCTCCTTCTTCTTCTTCC----- mirL 22 1
-----TTTTTTTCCTCCTTCTTCT----- mirL 20 1
-----TTCCTCCTTCTTCTTCTTCT----- mirL 21 1
-----TTTTTCCTCCTTCTTCTTCT----- mirL 20 1
-----TTCCTCCTTCTTCTTCTTCT----- mirL 19 1
-----TGGCTCCTGGAAGAGGAA----- mirR 18 9
-----TGGCTCCTGGAAGAGGAAC----- mirR 19 3
-----AGTGGCTCCTGGAAGAGGA----- mirR 19 1
-----GCTCCTGGAAGAGGAACAA----- mirR 19 1
-----GTGGCTCCTGGAAGAGGA----- mirR 18 1
-----GGCTCCTGGAAGAGGAAC----- mirR 18 1
-----ACAAGTGTGGGAAAAGGGAG morR 20 1

```

>mmu-mir-3104

```

ACGCTTCCCGAAAGGCCAACTAGGGGGCAGGAGCCGGAGCCCTCTGCTGAACTGACAGACGCTCTGCTTTGCTCCCCAGATCTCGATCCATCAGT species len reads
ACGCTTCCCGAAAGGCCAACTAGGGGGCAGGAGCCGGAGCCCTCTGCTGAACTGACAGACGCTCTGCTTTGCTCCCCAGATCTCGATCCATCAGT morL 21 1
-----AGGGGGCAGGAGCCGGAGCCCTC----- mirL 23 2
-----TAGGGGGCAGGAGCCGGAGC----- mirL 20 1
-----ACTAGGGGGCAGGAGCCGGAGCCC----- mirL 24 1
-----TAGGGGGCAGGAGCCGGAGCCC----- mirL 22 1
-----ACGCTCTGCTTTGCTCCCC----- mirR 20 12
-----ACGCTCTGCTTTGCTCCCCCAGA----- mirR 23 8
-----ACGCTCTGCTTTGCTCCCCAG----- mirR 22 7
-----ACGCTCTGCTTTGCTCCC----- mirR 18 6
-----ACGCTCTGCTTTGCTCCCCA----- mirR 21 6
-----ACGCTCTGCTTTGCTCCCC----- mirR 19 5
-----GACGCTCTGCTTTGCTCCCC----- mirR 21 3
-----GACGCTCTGCTTTGCTCCCC----- mirR 20 3
-----CGCTCTGCTTTGCTCCCCAGAT----- mirR 23 2
-----GACGCTCTGCTTTGCTCCCCCA----- mirR 22 1
-----AGACGCTCTGCTTTGCTCCCC----- mirR 22 1
-----CGCTCTGCTTTGCTCCCCAG----- mirR 21 1
-----CAGACGCTCTGCTTTGCT----- mirR 18 1
-----GACGCTCTGCTTTGCTCCCCCAGA----- mirR 24 1
-----AGACGCTCTGCTTTGCTCCCC----- mirR 21 1
-----GACGCTCTGCTTTGCTCCCCAG----- mirR 23 1
-----CCAGATCTCGATCCATCAGT morR 21 1

```

>mmu-mir-876

```
GCATTACATAAACTGTCACGTGCTATGGATTCTCTGTGAATCACTATATCAAATCTAGTGTGGTAGTGGTTACAAAGTAATTCATAGTGCTTCACAGGTGCTCCTACAGTTGATCTGTATTTTGAACCTAGG spec
-----ACATAAACTGTCACGTGC----- morL
GCATTACATAAACTGTCACGTG----- morL
-----TGGATTCTCTGTGAATCACT----- mirL
-----TGGATTCTCTGTGAATCACTA----- mirL
-----TGGATTCTCTGTGAATCA----- mirL
-----TGGATTCTCTGTGAATCACTAT----- mirL
-----TGGATTCTCTGTGAATC----- mirL
-----GGATTCTCTGTGAATCACTAT----- mirL
-----GGATTCTCTGTGAATCACT----- mirL
-----GGATTCTCTGTGAATCACTA----- mirL
-----TTCACAGGTGCTCCTACAGTT----- mirR
-----TTCACAGGTGCTCCTACA----- mirR
-----TTCACAGGTGCTCCTACAG----- mirR
-----TTCACAGGTGCTCCTACAGT----- mirR
-----ATCTGTATTTTGAACCTAGG morR
-----ATCTGTATTTTGAACCT--- morR
-----TGATCTGTATTTTGAAC---- morR
```

>mmu-mir-669f

| Sequence                                                                  | species | len | reads |
|---------------------------------------------------------------------------|---------|-----|-------|
| AGTTGTGTGTGCATGTGCATGTATATGAATATACATATACATACACACACACGTATAAACGCAAGCACAACAC | mirL    | 22  | 32    |
| AGTTGTGTGTGCATGTGCATGT-----                                               | mirL    | 18  | 5     |
| AGTTGTGTGTGCATGTGC-----                                                   | mirL    | 20  | 4     |
| AGTTGTGTGTGCATGTGCAT-----                                                 | mirL    | 25  | 1     |
| AGTTGTGTGTGCATGTGCATGTGT-----                                             | mirL    | 24  | 1     |
| -----CATATACATACACACACACGT-----                                           | mirR    | 21  | 11    |
| -----ATATACATACACACACACGTA-----                                           | mirR    | 21  | 2     |
| -----CATATACATACACACACACGTA-----                                          | mirR    | 22  | 1     |
| -----ATATACATACACACACACGTT-----                                           | mirR    | 20  | 1     |
| -----ATATACATACACACACACGTT-----                                           | mirR    | 22  | 1     |
| -----CATATACATACACACACACGTT-----                                          | mirR    | 23  | 1     |
| -----ATACATACACACACACGTA-----                                             | mirR    | 19  | 1     |
| -----TATAAACGCAAGCACAACAC-----                                            | morR    | 21  | 2     |
| -----TAAACGCAAGCACAACAC-----                                              | morR    | 19  | 1     |
| -----ATAAACGCAAGCACAAC--                                                  | morR    | 18  | 1     |

>mmu-mir-297c

| Sequence                                                                                                        | species | len | reads |
|-----------------------------------------------------------------------------------------------------------------|---------|-----|-------|
| ATATGTATGTGTGCATGTACATGTGTATATGAATATACATATACATACACACATACCCATACAAACATGCATACAAACACAAAAATTGGCACTCATCCATCTATTTGAATA | mirL    | 21  | 20    |
| --ATGTATGTGTGCATGTACATG-----                                                                                    | mirL    | 22  | 15    |
| --ATGTATGTGTGCATGTACATGT-----                                                                                   | mirL    | 18  | 12    |
| --ATGTATGTGTGCATGTAC-----                                                                                       | mirL    | 23  | 8     |
| --ATGTATGTGTGCATGTACAT-----                                                                                     | mirL    | 20  | 5     |
| -----TATGTGTGCATGTACATGTGT-----                                                                                 | mirL    | 21  | 1     |



```
-TATGTATGTGTGCATGTAC----- mirL 19 1
ATATGTATGTGTGCATGTAC----- mirL 20 1
-----CTCATCCATCTATTTGAATA mirR 20 1
```

>mmu-mir-701

```
ATTAGCCGCTGAAATAGATGGATTGTATAGATGAGGTTCTATCTATTTAAAGAGGCTAGCCACTTATCAAGTGCTAACAGCCCACTGCAGCAGAAGGCCGTGATGTGAGAAGGATAATTATAGCACAC species len
-TTAGCCGCTGAAATAGATGGA----- mirL 21 26
-TTAGCCGCTGAAATAGATGGAT----- mirL 22 16
-TTAGCCGCTGAAATAGATGG----- mirL 20 9
ATTAGCCGCTGAAATAGATGG----- mirL 21 2
-TTAGCCGCTGAAATAGATGGATT----- mirL 23 2
-TTAGCCGCTGAAATAGATG----- mirL 19 2
-----AGAAGGATAATTATAGCACAC mirR 21 5
-----CAGAAGGATAATTATAGC---- mirR 18 1
```

>mmu-mir-466h

```
TATGTCCATGTGTGTATATTTGTGTGTGCATGTGCTTGTGTGTATGTGAATATATATATATCATACGCACGCACACACACACAAAAT species len reads
TATGTCCATGTGTGTATATTTG----- morL 22 1
---TCCATGTGTGTATATTTGTGT----- morL 21 1
-----GTGCATGTGCTTGTGTGTA----- mirL 19 19
-----TGTGTGCATGTGCTTGTGTGT----- mirL 21 7
-----TGTGTGCATGTGCTTGTGTGTAT----- mirL 23 6
-----GTGCATGTGCTTGTGTGTAT----- mirL 20 4
-----TGCATGTGCTTGTGTGTA----- mirL 18 3
-----GTGTGCATGTGCTTGTGTGTAT----- mirL 22 3
-----TGCATGTGCTTGTGTGTAT----- mirL 19 2
-----GTGTGCATGTGCTTGTGTGT----- mirL 20 2
-----TGTGTGCATGTGCTTGTGTGTA----- mirL 22 2
-----TGCATGTGCTTGTGTGTATGTG----- mirL 22 1
-----TGCATGTGCTTGTGTGTATGTGA----- mirL 23 1
-----GTGTGCATGTGCTTGTGTGTA----- mirL 21 1
-----TGTGTGCATGTGCTTGTGT----- mirL 19 1
-----TGCATGTGCTTGTGTGTATG----- mirL 20 1
-----CATACGCACGCACACACACAC----- mirR 21 3
-----TACGCACGCACACACACACAAA----- mirR 23 2
-----TACGCACGCACACACACACAAAAT----- mirR 25 1
-----TATCATACGCACGCACAC----- mirR 18 1
-----CATACGCACGCACACACAC----- mirR 19 1
```

>mmu-mir-466f-1

```
TGTATGTGCATGTGTGTTTACGTGTGTGTGCATGTGCATGTGTGTATATGAATATACATACACATACACACACATGCAACACACACATATGAATGACACTCACTGATCACTTTTAAATGATATGTGA sp
TGTATGTGCATGTGTGTTTAC----- mo
--TATGTGCATGTGTGTTTACG----- mo
--ATGTGCATGTGTGTTTAC----- mo
-GTATGTGCATGTGTGTTTACG----- mo
-----ACGTGTGTGTGCATGTGCATGT----- mi
```

```

-----ACGTGTGTGTGCATGTGCAT----- mi
-----ACGTGTGTGTGCATGTGCATG----- mi
-----ACGTGTGTGTGCATGTGCA----- mi
-----ACGTGTGTGTGCATGTGC----- mi
-----TATGAATGACACTCACTGA----- mi
-----ATGAATGACACTCACTGA----- mi
-----TATGAATGACACTCACTG----- mi
-----ATATGAATGACACTCACTGA----- mi
-----TATGAATGACACTCACTGAT----- mi
-----ACTTTTAATGATATGTGA----- mo
-----GATCACTTTTAATGATAT----- mo

```

>mmu-mir-1939

```

CGATTCCCTGCCAATGCACTAAATGTAATGGTCTGGAAAATCTCTGAAGGAAGGCTCAGACTTGGTATGCAAAA species len reads
---TTCCCTGCCAATGCACTA----- mirL 18 9
CGATTCCCTGCCAATGCACT----- mirL 20 1
-----TCAGACTTGGTATGCAAAA- mirR 18 50
-----TCAGACTTGGTATGCAAAA mirR 19 1

```

>mmu-mir-1955

```

AGCTGGTTTACTTACTACAAGTCCCAGGATGCACTGCAGCTTTTCTTAACTTCAGATAAGAGCATTGCATGCTGGGACATGTAGTTGGTTTAAATAGCAC species len reads
AGCTGGTTTACTTACTACAAG----- morL 21 1
-----AGTCCCAGGATGCACTGCAGCT----- mirL 22 9
-----AGTCCCAGGATGCACTGCAGCTT----- mirL 23 9
-----AGTCCCAGGATGCACTGC----- mirL 18 6
-----AGTCCCAGGATGCACTGCAGCTTT----- mirL 24 3
-----AGTCCCAGGATGCACTGCAGCTTTT----- mirL 25 3
-----AAGTCCCAGGATGCACTGCAGC----- mirL 22 2
-----GAGCATTGCATGCTGGGACATGT----- mirR 23 10
-----GAGCATTGCATGCTGGGACAT----- mirR 21 5
-----GAGCATTGCATGCTGGGACA----- mirR 20 4
-----GAGCATTGCATGCTGGGAC----- mirR 19 4
-----GAGCATTGCATGCTGGGACATG----- mirR 22 3
-----AGCATTGCATGCTGGGAC----- mirR 18 1
-----TAGTTGGTTTAAATAGCAC morR 19 1

```

>mmu-mir-344e

```

CAGGGAAGGATTTGATCAGTCAGGCTTCTGGCTATATTCAGGACTTACCTGGTCTGGATATAACCAAAGCCTGACTATA species len reads
CAGGGAAGGATTTGATCA----- morL 18 2
---GGAAGGATTTGATCAGTC----- morL 18 1
---GAAGGATTTGATCAGTCA----- morL 18 1
-----TCAGGCTTCTGGCTATATTC----- mirL 21 1
-----CAGGCTTCTGGCTATATTC----- mirL 19 1
-----AGTCAGGCTTCTGGCTATATTC----- mirL 23 1
-----AGTCAGGCTTCTGGCTATATTC----- mirL 24 1
-----AGGCTTCTGGCTATATTC----- mirL 19 1

```

```

-----GATATAACCAAAGCCTGACTAT- mirR 22 42
-----GATATAACCAAAGCCTGAC---- mirR 19 6
-----GATATAACCAAAGCCTGACTATA mirR 23 2
-----CTGGATATAACCAAAGCC----- mirR 18 1
-----GATATAACCAAAGCCTGACT-- mirR 20 1

```

>mmu-mir-466m

```

TATGTATGTGCCTGTGTGTGTTCTTGTGTGTGCATGTGCATGTGTGTATATGAATATACATATACATACACACATACACACGCACGTACACACACACAAACACACAC species len reads
--TGTATGTGCCTGTGTGTGTTCTTGTGTGTGCATGTGCATGTGTGTATATGAATATACATATACATACACACATACACACGCACGTACACACACACAAACACACAC morL 21 1
TATGTATGTGCCTGTGTGTG----- morL 20 1
-----TCTTGTGTGTGCATGTGCATGT----- mirL 22 9
-----TCTTGTGTGTGCATGTGCAT----- mirL 20 2
-----TACACACATACACACGCAC----- mirR 19 11
-----TACACACATACACACGCACGTA----- mirR 22 7
-----TACACACATACACACGCACGT----- mirR 21 5
-----TACACACATACACACGCACGTAC----- mirR 23 5
-----ATACACACATACACACGCAC----- mirR 20 2
-----ACATACACACATACACACGCA----- mirR 21 2
-----ACATACACACATACACACGC----- mirR 20 1
-----ATACACACATACACACGC----- mirR 18 1
-----ATACACACATACACACGCACG----- mirR 21 1
-----TACACACATACACACGCACG----- mirR 20 1
-----TACACACATACACACGCA----- mirR 18 1
-----CATACACACATACACACGCACG----- mirR 22 1
-----GTACACACACACAAACAC----- morR 18 3
-----ACGTACACACACACAAACACA----- morR 21 2
-----CACGTACACACACACAAACAC----- morR 21 2
-----GTACACACACACAAACACAC----- morR 20 1
-----GTACACACACACAAACACAC----- morR 22 1
-----ACACACACACAAACACAC----- morR 18 1

```

>mmu-mir-3058

```

TCAGCCACGGCTTACCTGGAAGATTGAATGTCTACTTGGCTTTCTTCTGTGTCAGCCGTGGGTGCCTCTTGCTACTGGAAGAGCTC species len reads
TCAGCCACGGCTTACCTGGAA----- mirL 21 8
TCAGCCACGGCTTACCTGGAAG----- mirL 22 6
TCAGCCACGGCTTACCTGGAAGA----- mirL 23 6
TCAGCCACGGCTTACCTGGAA----- mirL 20 4
TCAGCCACGGCTTACCTG----- mirL 18 1
-----TTCCTGTCAGCCGTGGGTGC----- mirR 20 7
-----TTCCTGTCAGCCGTGGGTGCCTC----- mirR 23 7
-----TTCCTGTCAGCCGTGGGTGCCT----- mirR 22 5
-----TTCCTGTCAGCCGTGGGTGCC----- mirR 21 4
-----TCCTGTCAGCCGTGGGTGCCT----- mirR 21 2
-----TTCCTGTCAGCCGTGGGT----- mirR 18 2
-----TTCCTGTCAGCCGTGGGTGCCTCTT----- mirR 25 1
-----TCCTGTCAGCCGTGGGTGC----- mirR 19 1

```

```
-----TCCTGT CAGCCGTGGGTGCCTC----- mirR 22 1
-----TCCTGT CAGCCGTGGGTGCCTCT----- mirR 24 1
-----TCCTGT CAGCCGTGGGTGCCTCT----- mirR 23 1
-----TTCCTGT CAGCCGTGGGTGCCTCT----- mirR 24 1
-----TTCTTCCTGT CAGCCGTGG----- mirR 19 1
-----TTGCTACTGGAAGAGCTC morR 18 1
```

>mmu-mir-715

```
GAGCCATGTGGCTCCGTTGTGTGGTGGTGGCTGGGAGAGGGCTCCGTGCACACCCCGCGTGC GCGGTACTTTCCCTCCCTCCTGAGGGCCCGCGTGC GGGACGGGGTGTGGGTAGGCAACGGTGGGCTCCCGGGTCCC
-----GGTTGTGTGGTGGTGGCT-----
-----GTGTGGTGGTGGCTGGGG-----
-AGCCATGTGGCTCCGTTGTGTGGTGGTGGC-----
-----GGTTGTGTGGTGGTGGCTGG-----
-----GGTTGTGTGGTGGTGGCTGGGG-----
-----CTCCGTTGTGTGGTGGTGGC-----
-----CGTTGTGTGGTGGTGGC-----
GAGCCATGTGGCTCCGTTGTGTGGTGGTGGCTGG-----
-----TTGTGTGGTGGTGGCTGGG-----
-----TCCGTTGTGTGGTGGTGGCTGG-----
-ATGTGGCTCCGTTGTGTGGTGGTGGC-----
-----TCCGTTGTGTGGTGGTGGCTGGG-----
-----GGCTCCGTTGTGTGGTGGTGGC-----
-----GCTCCGTTGTGTGGTGGTGGCT-----
--GCCATGTGGCTCCGTTGTGTGGTGGTGGC-----
-----GGTTGTGTGGTGGTGGCTG-----
-----GGGAGAGGGCTCCGTGCAC-----
-----GGGAGAGGGCTCCGTGCA-----
-----GGGAGAGGGCTCCGTGCACAC-----
-----GAGAGGGCTCCGTGCACA-----
-----GGGAGAGGGCTCCGTGCACA-----
```

>mmu-mir-3084

```

GAATATAGTAATTCTGCCAGTCTCCTTCAGACAAAAAGA species len reads
--ATATAGTAATTCTGCCAG----- mirR 18 47
-AATATAGTAATTCTGCCA----- mirR 18 2
--ATATAGTAATTCTGCCAGT----- mirR 19 2
---TATAGTAATTCTGCCAGT----- mirR 18 1
----ATAGTAATTCTGCCAGTCTCCTTCAGACAAA---- mirR 31 1
GAATATAGTAATTCTGCCA----- mirR 19 1
-AATATAGTAATTCTGCCAG----- mirR 19 1
-----CTCCTTCAGACAAAAAGA morR 18 1
-----TCTCCTTCAGACAAAAAG- morR 18 1

```

>mmu-mir-3470a

```

TAGAGCCCTGGCTGTCCTGGACTCACTTTGTAGACCAGGCTGGCCTTAAATTCACAGAGATCAGCCTGCCTCTGCCTCCTGAGTGCTGGGATTAAGGCATGGTAACCCACCCAGTAGC species len reads
----GCCCTGGCTGTCCTGGAC----- morL 18 3
---AGCCCTGGCTGTCCTGGA----- morL 18 2
----GCCCTGGCTGTCCTGGACT----- morL 19 1
---AGCCCTGGCTGTCCTGGAC----- morL 19 1
TAGAGCCCTGGCTGTCCTGGAC----- morL 22 1
---AGCCCTGGCTGTCCTGGACTC----- morL 21 1
----CCCTGGCTGTCCTGGACTC----- morL 19 1
-----CTCACTTTGTAGACCAGGCTGGCC----- mirL 24 4
-----CTCACTTTGTAGACCAGGCT----- mirL 20 2
-----ACTCACTTTGTAGACCAGGCTGG----- mirL 23 1
-----ACTCACTTTGTAGACCAGGCT----- mirL 21 1
-----CTCACTTTGTAGACCAGGCTGGC----- mirL 23 1
-----ACTCACTTTGTAGACCAGG----- mirL 19 1
-----CTCACTTTGTAGACCAGG----- mirL 19 1
-----TGAGTGCTGGGATTAAGGC----- mirR 20 5
-----TGAGTGCTGGGATTAAG----- mirR 18 4
-----GAGTGCTGGGATTAAGGCATGG----- mirR 23 3
-----CCTGAGTGCTGGGATTAAGGC----- mirR 22 3
-----TGAGTGCTGGGATTAAGG----- mirR 19 2
-----GTGCTGGGATTAAGGCATGG----- mirR 21 1
-----AGTGCTGGGATTAAGGCATGG----- mirR 22 1
-----CTGAGTGCTGGGATTAAGG----- mirR 20 1
-----TCCTGAGTGCTGGGATTAAG----- mirR 21 1
-----TGAGTGCTGGGATTAAGGCA----- mirR 21 1
-----TCCTGAGTGCTGGGATTA----- mirR 18 1
-----GAGTGCTGGGATTAAGGC----- mirR 19 1
-----CTGAGTGCTGGGATTAAG----- mirR 18 1
-----CTGAGTGCTGGGATTAAGGC----- mirR 21 1
-----TCCTGAGTGCTGGGATTAAGGCAT----- mirR 25 1
-----CCTGAGTGCTGGGATTAAGGCATGGTAAC----- mirR 30 1
-----CTGAGTGCTGGGATTAAGGCATGG----- mirR 25 1
-----TCCTGAGTGCTGGGATTAAGG----- mirR 22 1
-----GGTAACCCACCCAGTAGC morR 19 4

```

-----GGTAACCACACCCAGTAG- morR 18 1

>mmu-mir-1-2-as

|                                                                                | species | len | reads |
|--------------------------------------------------------------------------------|---------|-----|-------|
| TACATACTTCTTTACATTCCATAGCACTGAATGTTTCATATGGGTACATAAAGAAGTATGTGCTCTGAGTAGGCACTC | mirL    | 21  | 14    |
| TACATACTTCTTTACATTCCA-----                                                     | mirL    | 20  | 11    |
| TACATACTTCTTTACATTCC-----                                                      | mirL    | 22  | 8     |
| -ACATACTTCTTTACATTCCA-----                                                     | mirL    | 20  | 2     |
| TACATACTTCTTTACATTCC-----                                                      | mirL    | 19  | 2     |
| -ACATACTTCTTTACATTCCAT-----                                                    | mirL    | 21  | 1     |
| --CATACTTCTTTACATTCCA-----                                                     | mirL    | 19  | 1     |
| -ACATACTTCTTTACATTCC-----                                                      | mirL    | 18  | 1     |
| -ACATACTTCTTTACATTCCATA-----                                                   | mirL    | 22  | 1     |
| -ACATACTTCTTTACATTCCATAGC-----                                                 | mirL    | 24  | 1     |
| -----TAGCACTGAATGTTTCATATGG-----                                               | loop    | 21  | 6     |
| -----CATAGCACTGAATGTTCA-----                                                   | loop    | 18  | 1     |
| -----CATAGCACTGAATGTTTCAT-----                                                 | loop    | 19  | 1     |
| -----TGGGTACATAAAGAAGTATGT-----                                                | mirR    | 21  | 2     |
| -----TGGGTACATAAAGAAGTATGTGC-----                                              | mirR    | 23  | 1     |
| -----TGGGTACATAAAGAAGTATG-----                                                 | mirR    | 20  | 1     |
| -----TGCTCTGAGTAGGCACTC-----                                                   | morR    | 18  | 1     |

>mmu-mir-669m-2

|                                                                                             | species | len | reads |
|---------------------------------------------------------------------------------------------|---------|-----|-------|
| ATTTGCATGTGTATAGTTTGTGTGCATGTGCATGTGTATATGAATATACATATACATCCACACAAACATATACAAGCATGCACAGATATAC | morL    | 19  | 1     |
| ATTTGCATGTGTATAGT-----                                                                      | mirL    | 28  | 1     |
| -----AGTTTGTGTGCATGTGCATGTGTAT-----                                                         | mirR    | 22  | 27    |
| -----ATATACATCCACACAAACATAT-----                                                            | mirR    | 19  | 13    |
| -----CATATACATCCACACAAAC-----                                                               | mirR    | 23  | 3     |
| -----CATATACATCCACACAAACATAT-----                                                           | mirR    | 22  | 3     |
| -----CATATACATCCACACAAACATA-----                                                            | mirR    | 21  | 2     |
| -----TATACATCCACACAAACATAT-----                                                             | mirR    | 21  | 2     |
| -----ATATACATCCACACAAAC-----                                                                | mirR    | 18  | 1     |
| -----ATATACATCCACACAAACAT-----                                                              | mirR    | 20  | 1     |
| -----ACAAGCATGCACAGATATAC-----                                                              | morR    | 20  | 1     |

>mmu-mir-669m-1

|                                                           | species | len | reads |
|-----------------------------------------------------------|---------|-----|-------|
| AGTTTGTGTGCATGTGCATGTGTATATGAATAGACATATACATCCACACAAACATAT | mirL    | 28  | 1     |
| AGTTTGTGTGCATGTGCATGTGTAT-----                            | mirR    | 22  | 27    |
| -----ATATACATCCACACAAACATAT-----                          | mirR    | 19  | 13    |
| -----CATATACATCCACACAAAC-----                             | mirR    | 22  | 3     |
| -----CATATACATCCACACAAACATA-----                          | mirR    | 23  | 3     |
| -----CATATACATCCACACAAACATAT-----                         | mirR    | 21  | 2     |
| -----TATACATCCACACAAACATAT-----                           | mirR    | 21  | 2     |
| -----ATATACATCCACACAAACAT-----                            | mirR    | 20  | 1     |

```
-----ATATACATCCACACAAAC---- mirR 18 1

>mmu-mir-1942
GAATAAAGAGAAGAGGCCATTATTAATGTTAGACATCTAACCTCAGATGTCTTCATCTGGTTGGCCTCTTGTAAGG species len reads
GAATAAAGAGAAGAGGCC----- morL 18 1
-AATAAAGAGAAGAGGCCT----- morL 18 1
-----TATTTAATGTTAGACATC----- mirL 18 2
-----TTTAATGTTAGACATCTA----- mirL 18 1
-----TCTAACCTCAGATGTCTT----- loop 18 2
-----TAACCTCAGATGTCTTCATC----- loop 20 1
-----ACCTCAGATGTCTTCATC----- loop 18 1
-----TAACCTCAGATGTCTTCATCT----- loop 21 1
-----TCTAACCTCAGATGTCTTCA----- loop 20 1
-----TCTGGTTGGCCTCTTGTA--- mirR 18 28
-----TCTGGTTGGCCTCTTGTAAG- mirR 20 6
-----TCTGGTTGGCCTCTTGTA-- mirR 19 4
-----TCTGGTTGGCCTCTTGTAAGG mirR 21 2

>mmu-mir-669g
GTGCATTGTATGTGTTGACATGATATACATAACATAAACACACGTGTATCTGCAAGCACACACACAGGAAAAATTGCATTCATTTAT species len reads
GTGCATTGTATGTGTTGA----- mirL 18 37
GTGCATTGTATGTGTTGAC----- mirL 19 3
GTGCATTGTATGTGTTGACA----- mirL 20 3
-----AGCACACACACAGGAAA----- mirR 19 3
-----AGCACACACACAGGAAA----- mirR 20 1
-----CACACACACAGGAAAAATTG----- mirR 22 1
-----AGCACACACACAGGAAAAAT----- mirR 22 1
-----AAAATTGCATTCATTTAT morR 18 1

>mmu-mir-1968
ACTGTCAGGGCCACCTCCTCTGCAGCTGTTAAGGATGGTGGACTATTGTTAGGGCCACCACCTCTGCAGCTGTTAAGGAGGGTGC species len reads
ACTGTCAGGGCCACCTCCT----- morL 19 1
-----TGCAGCTGTTAAGGATGGTGGAC----- mirL 23 10
-----TCTGCAGCTGTTAAGGATGGTGG----- mirL 23 5
-----TCTGCAGCTGTTAAGGATGGT----- mirL 21 5
-----TCTGCAGCTGTTAAGGATGGTG----- mirL 22 3
-----GCAGCTGTTAAGGATGGTG----- mirL 19 2
-----TGCAGCTGTTAAGGATGGTGG----- mirL 21 2
-----TGCAGCTGTTAAGGATGGTGGA----- mirL 22 2
-----TCTGCAGCTGTTAAGGAT----- mirL 18 1
-----CTGCAGCTGTTAAGGATGGT----- mirL 20 1
-----TCTGCAGCTGTTAAGGATGG----- mirL 20 1
-----TGCAGCTGTTAAGGATGGTGGACTA----- mirL 25 1
-----TGCAGCTGTTAAGGATGGT----- mirL 19 1
-----CTGCAGCTGTTAAGGATGG----- mirL 19 1
-----ACTATTGTTAGGGCCACC----- loop 18 1
```

```
-----TTGTTAGGGCCACCACCT----- loop 18 1
-----TCTGCAGCTGTTAAGGAG----- mirR 18 5
-----TCTGCAGCTGTTAAGGAGGGTGC mirR 23 4
-----TCTGCAGCTGTTAAGGAGGGT-- mirR 21 2
-----TCTGCAGCTGTTAAGGAGGG-- mirR 20 1
```

>mmu-mir-3090

```
TCCTGTCCAGTGGTCTGGGTGGGGCCTGAGATCCTGAATTTCTAATGAGCTCCAGGTGACACCCTGACTCAC species len reads
TCCTGTCCAGTGGTCTGGGTG----- mirL 22 2
-----TCCCAGGTGACACCCTGACTCAC mirR 23 22
-----TCCCAGGTGACACCCTGACTCA- mirR 22 9
-----TCCCAGGTGACACCCTGACTC-- mirR 21 7
-----TCCCAGGTGACACCCTGACT-- mirR 20 5
-----TCCCAGGTGACACCCTGAC--- mirR 19 2
-----CCCAGGTGACACCCTGACTCA- mirR 21 1
-----CCCAGGTGACACCCTGACTCAC mirR 22 1
```

>mmu-mir-3091

```
GCCATGGGTCTGGTTGGGCCCGCAGACTCGGAGTGCGGGCCCTGACCAGTCTCAAGACCTGCGTGGTAACTCTGCAGGGACGGCCTCAGGATGCAGAACGACGCCGGCGAGTT species len reads
--CATGGGTCTGGTTGGGCCCGC----- mirL 21 9
--CATGGGTCTGGTTGGGCC----- mirL 18 3
--CATGGGTCTGGTTGGGCCCGCAG----- mirL 23 1
--CATGGGTCTGGTTGGGCCCGCAGAC----- mirL 25 1
GCCATGGGTCTGGTTGGGCC----- mirL 19 1
--CATGGGTCTGGTTGGGCCCGCAGA----- mirL 24 1
--CCATGGGTCTGGTTGGGCC----- mirL 19 1
-----CAGAACGACGCCGGCGAGTT mirR 20 25
-----CAGAACGACGCCGGCGAG-- mirR 18 5
-----CAGAACGACGCCGGCGAGT- mirR 19 1
-----AGAACGACGCCGGCGAGTT mirR 19 1
```

>mmu-mir-1186

```
GTAGACCAGGCTGGCCTTGAAGTCAAGAAATCCACCTGTCTCTGCCTCCCGAGTGTGGAATTAAGGCATGCACCACCCTGCCCGCAGGTTCTGTTATTTCTGAGTGTGAGAAATATATGGGGAAAAGTCTTCATGGTG
----ACCAGGCTGGCCTTGAAGTCAAGAAATC-----
---GACCAGGCTGGCCTTGAAGTCAAGAAATC-----
--AGACCAGGCTGGCCTTGAAGTCAAGAAATC-----
----CAGGCTGGCCTTGAAGTCAAGAAATC-----
-----GCCTTGAAGTCAAGAAATCC-----
-----TGGCCTTGAAGTCAAGAAATC-----
-----GGCCTTGAAGTCAAGAAATC-----
GTAGACCAGGCTGGCCTTGAAGTCAAGAAATC-----
-----CCAGGCTGGCCTTGAAGTCAAGAAATCC-----
-----AGGCTGGCCTTGAAGTCAAGAAATCC-----
-----GGCTGGCCTTGAAGTCAAGAAATC-----
GTAGACCAGGCTGGCCTTGAAGTCAAGAAATC-----
-----GGCCTTGAAGTCAAGAAATCC-----
```



---GACCAGGCTGGCCTTGAACCTCAGAAATCC---  
-----TCCACCTGTCTCTGCCTCC-----  
-----CACCTGTCTCTGCCTCCCGA-----  
-----AAATCCACCTGTCTCTGCCTCC-----  
-----  
-----  
-----  
-----  
-----  
-----  
-----  
-----  
-----  
-----  
-----  
-----  
-----  
-----  
-----

>mmu-mir-297b  
ATCTATTTGCTTGTGTATATGTATGTGTGCATGAACATGTGTATATGAATATACATATACATACACACATACCCATACAAACATGCATACAAACACACAGAAAATGGATACTCATTGTTCTATTGAA species le  
ATCTATTTGCTTGTGTATATATGTATGTGTGCATGAACATGTGTATATGAATATACATATACATACACACATACCCATACAAACATGCATACAAACACACAGAAAATGGATACTCATTGTTCTATTGAA morL 19 1  
-----ATGTATGTGTGCATGAACATGTG----- mirL 23 12  
-----ATGTATGTGTGCATGAACATGT----- mirL 22 11  
-----ATGTATGTGTGCATGAACATGTGT----- mirL 24 6  
-----ATGTATGTGTGCATGAACAT----- mirL 20 5  
-----ATGTATGTGTGCATGAAC----- mirL 18 5  
-----TATGTATGTGTGCATGAACAT----- mirL 21 1  
-----TATGTGTGCATGAACATGTGTAT----- mirL 22 1  
-----TATGTATGTGTGCATGAACATG----- mirL 22 1  
-----TGTATGTGTGCATGAACATGTG----- mirL 22 1  
-----TATGTATGTGTGCATGAACA----- mirL 20 1  
-----ACTCATTGTTCTATTGAA mirR 18 2  
-----GATACTCATTGTTCTATTG----- mirR 19 1  
-----TACTCATTGTTCTATTGA----- mirR 18 1

>mmu-mir-449c  
TGAAGTGTGGGTGTGTTCAGGCAGGCAGTGCATTGCTAGCTGGCTGTTAGAACTTTATCCCAACAGTTGCTAGCTGCACTACCCTCTGCTGCACTCAGAAGCATGCAAAGACGTGGAAAATAGTGCCATCTGGTGGATAAGG  
TGAAGTGTGGGTGTGTTCAGGCAGGCAGTGCATTGCTAGCTGGCTGTTAGAACTTTATCCCAACAGTTGCTAGCTGCACTACCCTCTGCTGCACTCAGAAGCATGCAAAGACGTGGAAAATAGTGCCATCTGGTGGATAAGG  
TGAAGTGTGGGTGTGTTCAGGCAGGCAGTGCATTGCTAGCTGGCTGTTAGAACTTTATCCCAACAGTTGCTAGCTGCACTACCCTCTGCTGCACTCAGAAGCATGCAAAGACGTGGAAAATAGTGCCATCTGGTGGATAAGG  
-----AGGCAGTGCATTGCTAGCTGGC-----  
-----AGGCAGTGCATTGCTAGC-----  
-----AGGCAGTGCATTGCTAGCTGGCT-----  
-----AGGCAGTGCATTGCTAGCTGG-----  
-----AGGCAGTGCATTGCTAGCTG-----  
-----TAGTGCCATCTGGTGGATAAG-----  
-----TAGTGCCATCTGGTGGAT-----  
-----ATAGTGCCATCTGGTGGATA-----

-----TAGTGCCATCTGGTGGATAAGG  
-----AGTGCCATCTGGTGGATA---  
-----TAGTGCCATCTGGTGGATA---

>mmu-mir-3095

```
CCACCCAGAGCCCTGTGCACAAGCTTTCTCATCTGTGACACTCGAGATGGTTTCAGGGAGTGGACACTGGAGAGAGAGCTTTT species len reads
---CCCAGAGCCCTGTGCACA----- morL 18 1
CCACCCAGAGCCCTGTGC----- morL 18 1
--ACCCAGAGCCCTGTGCAC----- morL 18 1
-----AAGCTTTCTCATCTGTGACACTC----- mirL 23 12
-----AAGCTTTCTCATCTGTGACAC----- mirL 21 4
-----AAGCTTTCTCATCTGTGACACT----- mirL 22 2
-----AAGCTTTCTCATCTGTGAC----- mirL 19 2
-----AGCTTTCTCATCTGTGACACT----- mirL 21 1
-----AGCTTTCTCATCTGTGACACTC----- mirL 22 1
-----GAGATGGTTTCAGGGAGT----- loop 18 2
-----TGGACACTGGAGAGAGAGCTTTT mirR 23 8
-----TGGACACTGGAGAGAGAGCTT-- mirR 21 2
-----TGGACACTGGAGAGAGAGCTTT- mirR 22 2
-----AGTGGACACTGGAGAGAGA----- mirR 19 2
-----TGGACACTGGAGAGAGAGC---- mirR 19 2
-----GTGGACACTGGAGAGAGAGCTTT- mirR 23 1
-----GAGTGGACACTGGAGAGAGA----- mirR 20 1
-----GTGGACACTGGAGAGAGA----- mirR 18 1
```

>mmu-mir-1946b

```
TGCCTCCGGAGTGTGGGATTAAGGCGTGCGCCACCACTGCCAGCTTTCAGAGTGAATTTGAGGCTATCTGGCTATATGAGACTGCTTCACAGGGTAAGAAAAGGGGAAAGTGCCGGGCAGTGGTGGCACATGCTTTTA
-----CGGAGTGTGGGATTAAG-----
TGCCTCCGGAGTGTGGGATTAAG-----
-GCCTCCGGAGTGTGGGAT-----
-----AAGGCGTGCGCCACCACTG-----
-----AGGCGTGCGCCACCACTG-----
-----AAGGCGTGCGCCACCACT-----
-----AAGGCGTGCGCCACCACTGC-----
-----AAAGGCGTGCGCCACCAC-----
-----AGGCGTGCGCCACCACTGCC-----
-----TAAAGGCGTGCGCCACCACTGCC-----
-----AGGCGTGCGCCACCACTGC-----
-----AAGGCGTGCGCCACCACTGCC-----
-----GCGTGCGCCACCACTGCC-----
-----GCGTGCGCCACCACTGCCAGCT-----
```

```

>mmu-mir-1306
TGGACGTTGGCTCTGGTGGTGATGGACAGTCCGAACCTCCTGCCGACGACCCATTCAACTTCTACGGAGCTTCTCTTCTCTCCAAGGATCCTTCTCTAAGGGC species len reads
---ACGTTGGCTCTGGTGGTGATG----- mirL 21 7
---ACGTTGGCTCTGGTGGTGATGG----- mirL 22 7
--GACGTTGGCTCTGGTGGTGA----- mirL 20 7
--GACGTTGGCTCTGGTGGTGAT----- mirL 21 4
--GACGTTGGCTCTGGTGGTG----- mirL 19 4
---ACGTTGGCTCTGGTGGTGA----- mirL 19 3
--GACGTTGGCTCTGGTGGTGATGG----- mirL 23 3
--GACGTTGGCTCTGGTGGTGATG----- mirL 22 2
TGGACGTTGGCTCTGGTGGTGA----- mirL 22 1
TGGACGTTGGCTCTGGTGGT----- mirL 20 1
TGGACGTTGGCTCTGGTGGTGAT----- mirL 23 1
-----GCTTCTCTTCTCTCCAAA----- mirR 18 2
-----GAGCTTCTCTTCTCTCCA----- mirR 18 1
-----AAGGATCCTTCTCTAAGGGC----- morR 20 1

```

```

>mmu-mir-2136
CGCGTATCCAGTCAGGAGTCAGTTAGGAAGTTTAAAGTCTGAATTAATTTCTGGGTGTTGACTGAGATGTGGTGGGGACCAGACCATTTTGTCACAGAATAGTGTGTGTGTGTGTGTGTGTGTGTGT species len re
---GTATCCAGTCAGGAGTCA----- mirL 18 1
-GCGTATCCAGTCAGGAGTCAG----- mirL 21 1
---CGTATCCAGTCAGGAGTC----- mirL 18 1
----TATCCAGTCAGGAGTCAG----- mirL 18 1
CGCGTATCCAGTCAGGAG----- mirL 18 1
-----TAGTGTGTGTGTGTGTGTGTGT----- mirR 22 13
-----TAGTGTGTGTGTGTGTGTGTGT----- mirR 21 11
-----ATAGTGTGTGTGTGTGTGTGTGT----- mirR 18 3
-----ATAGTGTGTGTGTGTGTGTGTGT----- mirR 21 2
-----TAGTGTGTGTGTGTGTGTGTGT----- mirR 23 2
-----ATAGTGTGTGTGTGTGTGTGTGT----- mirR 22 2
-----TAGTGTGTGTGTGTGTGTGTGT----- mirR 19 1
-----TAGTGTGTGTGTGTGTGTGTGTGT----- mirR 24 1
-----TAGTGTGTGTGTGTGTGTGT----- mirR 18 1
-----ATAGTGTGTGTGTGTGTGTGT----- mirR 20 1
-----AGTGTGTGTGTGTGTGTGTGTGT----- mirR 23 1
-----AGTGTGTGTGTGTGTGTGTGTGT----- mirR 25 1

```

```

>mmu-mir-467f
GGGGGTGGGTGTGTGTAGGTGTGTGTGTGTATGTATGTATATACACACACACCTACACACAGCTTTTTTTGGAATTTTAAACATT species len reads
GGGGGTGGGTGTGTGTGT----- mirL 18 16
GGGGGTGGGTGTGTGTGT----- mirL 19 3
-GGGGTGGGTGTGTGTGT----- mirL 18 1
GGGGGTGGGTGTGTGTGTAG----- mirL 20 1
---GGTGGGTGTGTGTAGGT----- mirL 19 1

```

```

-----TTTTTGGGAATTTTAAACA-- mirR 18 9
-----CTTTTTGGGAATTTTAA---- mirR 18 5
-----TTTTTGGGAATTTTAAAC--- mirR 18 2
-----TTTTTGGGAATTTTAAACAT- mirR 19 2
-----TTTTTGGGAATTTTAAACAT- mirR 20 1
-----TTTGGGAATTTTAAACATT mirR 18 1
-----TTTTGGGAATTTTAAACAT- mirR 18 1

```

>mmu-mir-3077

```

AATGGCGCGCCCGAGGCTGACTCCCTGCTTCTCCGCAGACCTGCCCGCTCCTGCTGCGGGTCTTCACCACC species len reads
AATGGCGCGCCCGAGGCT----- loop 18 1
-----CTGACTCCCTGCTTCTCCGCAG----- mirR 22 6
-----CTGACTCCCTGCTTCTCCGC----- mirR 20 6
-----TGACTCCCTGCTTCTCCGCAGA----- mirR 22 5
-----CTGACTCCCTGCTTCTCCGCA----- mirR 21 5
-----CTGACTCCCTGCTTCTCC----- mirR 18 4
-----TGACTCCCTGCTTCTCCGC----- mirR 19 3
-----TGACTCCCTGCTTCTCCGCAGAC----- mirR 23 3
-----TGACTCCCTGCTTCTCCGCA----- mirR 20 2
-----TGACTCCCTGCTTCTCCGCAGACC----- mirR 24 2
-----TGACTCCCTGCTTCTCCGCAG----- mirR 21 2
-----CTGACTCCCTGCTTCTCCGCAGAC----- mirR 24 1
-----CTGACTCCCTGCTTCTCCGCAGACC----- mirR 25 1
-----CTGACTCCCTGCTTCTCCGCAGA----- mirR 23 1
-----AGACCTGCCCGCTCCTGCTGCGGGTCTTCACCACC morR 35 1

```

>mmu-mir-467h

```

AATTTTCACTTTTGTTTTTCTCATGTATATGTGTATGTGTGCGGTGTACATAAATTATATCTATGTGTGCATGTATGTGGACATAAGTGTGTGCATGTATATGTGTGTGTGGTGTACATA species len reads
AATTTTCACTTTTGTTTTTCTCATGTATATGTGTATGTGTGCGGTGTACATAAATTATATCTATGTGTGCATGTATGTGGACATAAGTGTGTGCATGTATATGTGTGTGTGGTGTACATA morL 20 4
-AATTTTCACTTTTGTTTTTCTCATGTATATGTGTATGTGTGCGGTGTACATAAATTATATCTATGTGTGCATGTATGTGGACATAAGTGTGTGCATGTATATGTGTGTGTGGTGTACATA morL 19 1
AATTTTCACTTTTGTTTTTCTCATGTATATGTGTATGTGTGCGGTGTACATAAATTATATCTATGTGTGCATGTATGTGGACATAAGTGTGTGCATGTATATGTGTGTGTGGTGTACATA morL 18 1
-----TCTCATGTATATGTGTAT----- mirL 18 8
-----TCTCATGTATATGTGTATG----- mirL 19 4
-----TCTCATGTATATGTGTATGT----- mirL 20 4
-----TCTCATGTATATGTGTATGTG----- mirL 21 3
-----TCTCATGTATATGTGTATGTGT----- mirL 22 2
-----TTCTCATGTATATGTGTAT----- mirL 19 1
-----TTCTCATGTATATGTGTATG----- mirL 20 1
-----TTCTCATGTATATGTGTATGTG----- mirL 22 1
-----CTCATGTATATGTGTATGTG----- mirL 20 1
-----TCATGTATATGTGTATGTGTGC----- mirL 22 1
-----TTCTCATGTATATGTGTATGT----- mirL 21 1
-----TATGTGTGTGTGTGGTGTAC----- mirR 19 3
-----TATGTGTGTGTGTGGTGTAC----- mirR 20 3
-----TATGTGTGTGTGTGGTGTACA----- mirR 21 2
-----GTGTGTGTGTGGTGTACATA----- mirR 20 1

```

```
-----ATGTGTGTGTGTGGTGTA---- mirR 18 1  
  
>mmu-mir-1901  
AAGGCGATGGGCAGGATTCCCTGAGTGAACGAGTTGAGGCGGCCCGACTGCCGCTCGTACTCCCGGGGTCCCGGAGCCAAAAGCTGGCCGATGGCACCTGCACGTTGGTGAAGGCATCGTCCTCCT species 1  
AAGGCGATGGGCAGGATT----- morL 19 1  
--GGCGATGGGCAGGATTCC----- morL 18 1  
AAGGCGATGGGCAGGATT----- morL 18 1  
-----TCCCTGAGTGAACGAGTTGA----- mirL 20 18  
-----CCTGAGTGAACGAGTTGAGGC----- mirL 21 1  
-----TCCCTGAGTGAACGAGTTG----- mirL 19 1  
-----TCCCTGAGTGAACGAGTTGAGG----- mirL 22 1  
-----CCCTGAGTGAACGAGTTG----- mirL 18 1  
-----CGATGGCACCTGCACGTT----- mirR 18 8  
-----CGATGGCACCTGCACGTTG----- mirR 19 4  
-----CGATGGCACCTGCACGTTGG----- mirR 20 2  
-----CGATGGCACCTGCACGTTGGT----- mirR 21 1  
-----CGATGGCACCTGCACGTTGGTG----- mirR 22 1  
-----TGGTGAAGGCATCGTCCT--- morR 18 1  
-----GGTGAAGGCATCGTCCTCCT morR 20 1
```

```
>mmu-mir-3471-2  
GGAGCTGCAATTGAAGAAATGCCTCCATGAGATCCAAGTGAAGGCATTTCCCAATTAGTGATAAAGGGGAAAAGGCCCTTGTGGGTGGGACAATCTCTGGGCTGGTAGTCTTGGGTTCTATAAAGAGAGCAGGCTGAGC  
GGAGCTGCAATTGAAGAAAT-----  
--AGCTGCAATTGAAGAAAT-----  
-----TCCATGAGATCCAAGTGT-----  
-----TCCATGAGATCCAAGTGAAGGC-----  
-----GCCTCCATGAGATCCAAGT-----  
-----GAGAGCAGGCTGAGC-----  
-----AAGAGAGCAGGCTGAGC-----  
-----TAAGAGAGCAGGCTGAGC-----  
-----AGCAGGCTGAGC-----  
-----AGCAGGCTGAGC-----  
-----AGAGCAGGCTGAGC-----  
-----GAGCAGGCTGAGC-----  
-----AGCAGGCTGAGC-----  
-----AAGAGAGCAGGCTGAGC-----  
-----AGCAGGCTGAGC-----  
-----AGCAGGCTGAGC-----  
-----GAGCAGGCTGAGC-----  
-----AGAGAGCAGGCTGAGC-----  
-----AGAGAGCAGGCTGAGC-----  
-----AAGAGAGCAGGCTGAGC-----  
-----AGAGAGCAGGCTGAGC-----  
-----AGAGAGCAGGCTGAGC-----  
-----AGAGAGCAGGCTGAGC-----  
-----AGAGAGCAGGCTGAGC-----
```

-----GAGAGCAGGCTGAGC  
-----AGCAGGCTGAGC  
-----AGAGAGCAGGCTGAGC

>mmu-mir-680-3

|                                                                                                         | species | len | reads |
|---------------------------------------------------------------------------------------------------------|---------|-----|-------|
| GGGGATTTAACAAAGAACAAAAAGGTGGGCATCTGCTGACATGGGGCAGAAGTCAGGCTCTAGGCAGCAGGTACTCTTCATCTTATCTCCAGAACATAGATCC | morL    | 21  | 4     |
| -GGGATTTAACAAAGAACAAAA-----                                                                             | morL    | 18  | 2     |
| -GGGATTTAACAAAGAACA-----                                                                                | morL    | 18  | 2     |
| -----TTTAACAAAGAACAAAA-----                                                                             | morL    | 18  | 2     |
| ---GATTTAACAAAGAACAAAA-----                                                                             | morL    | 19  | 1     |
| GGGGATTTAACAAAGAAC-----                                                                                 | morL    | 18  | 1     |
| ---GATTTAACAAAGAACAAA-----                                                                              | morL    | 18  | 1     |
| --GGATTTAACAAAGAACAAA-----                                                                              | morL    | 19  | 1     |
| -----TTAACAAAGAACAAAA-----                                                                              | morL    | 18  | 1     |
| -GGGATTTAACAAAGAACAAA-----                                                                              | morL    | 20  | 1     |
| -----AAAGGTGGGCATCTGCTG-----                                                                            | mirL    | 18  | 20    |
| -----AAGGTGGGCATCTGCTGA-----                                                                            | mirL    | 18  | 2     |
| -----AAGGTGGGCATCTGCTGAC-----                                                                           | mirL    | 19  | 2     |
| -----AAAAAAGGTGGGCATCTG-----                                                                            | mirL    | 18  | 1     |
| -----AGGTGGGCATCTGCTGAC-----                                                                            | mirL    | 18  | 1     |
| -----AAAGGTGGGCATCTGCTGA-----                                                                           | mirL    | 19  | 1     |
| -----TATCTCCAGAACATAGATCC-----                                                                          | mirR    | 20  | 1     |
| -----ATCTCCAGAACATAGATCC-----                                                                           | mirR    | 19  | 1     |

>mmu-mir-3103

|                                                                                     | species | len | reads |
|-------------------------------------------------------------------------------------|---------|-----|-------|
| GAGAGGAGGTATGGGGAGGAGGAGGATCTGCTGTTAGAAAGTCTCTGGTTTGTGACCTCTAACCTCTGATCCTTCCCACAGGC | morL    | 18  | 1     |
| GAGAGGAGGTATGGGGAG-----                                                             | mirL    | 21  | 1     |
| -----AGGAGGAGGATCTGCTGTTA-----                                                      | mirL    | 19  | 1     |
| -----GGAGGAGGATCTGCTGTT-----                                                        | loop    | 21  | 1     |
| -----GAAAGTCTCTGGTTTGTGACC-----                                                     | mirR    | 20  | 12    |
| -----TAACCTCTGATCCTTCCCAC-----                                                      | mirR    | 21  | 10    |
| -----TAACCTCTGATCCTTCCCACA-----                                                     | mirR    | 20  | 3     |
| -----AACCTCTGATCCTTCCCACA-----                                                      | mirR    | 22  | 2     |
| -----TAACCTCTGATCCTTCCCACAG-----                                                    | mirR    | 25  | 2     |
| -----TCTAACCTCTGATCCTTCCCACAGG-----                                                 | mirR    | 24  | 2     |
| -----TAACCTCTGATCCTTCCCACAGGC-----                                                  | mirR    | 23  | 2     |
| -----TAACCTCTGATCCTTCCCACAGG-----                                                   | mirR    | 19  | 1     |
| -----TCTAACCTCTGATCCTTCCC-----                                                      | mirR    | 22  | 1     |
| -----TCTAACCTCTGATCCTTCCCAC-----                                                    | mirR    | 18  | 1     |
| -----TAACCTCTGATCCTTCCC-----                                                        | mirR    | 19  | 1     |
| -----AACCTCTGATCCTTCCCAC-----                                                       | mirR    | 19  | 1     |
| -----TAACCTCTGATCCTTCCCAC-----                                                      | mirR    | 19  | 1     |

>mmu-mir-2137

|                                           | species | len | reads |
|-------------------------------------------|---------|-----|-------|
| GCCGGCGGAGCCCCAGGGAGTAGAGCATTGCAGACAGGCCA | mirR    | 19  | 12    |
| --CGGCGGAGCCCCAGGGAG-----                 |         |     |       |

```
---GGCGGGAGCCCCAGGGAG----- mirR 18 6
GCCGGCGGGAGCCCCAGGGAG----- mirR 21 4
---GGCGGGAGCCCCAGGGAGTA----- mirR 20 4
--CGGCGGGAGCCCCAGGGGA----- mirR 18 4
GCCGGCGGGAGCCCCAGG----- mirR 18 2
GCCGGCGGGAGCCCCAGGGGA----- mirR 20 2
---GGCGGGAGCCCCAGGGAGT----- mirR 19 1
-CCGGCGGGAGCCCCAGGGAG----- mirR 20 1
GCCGGCGGGAGCCCCAGGG----- mirR 19 1
GCCGGCGGGAGCCCCAGGGAGT----- mirR 22 1
-----TAGAGCATTGCAGACAGGCC- morR 20 1
-----AGAGCATTGCAGACAGGCCA morR 20 1
-----TAGAGCATTGCAGACAGG--- morR 18 1
-----TAGAGCATTGCAGACAGGCCA morR 21 1
```

>mmu-mir-466f-4

```
AGTGTGTGCATCTGCATCTGTGTGTCTACGTGTGTGTGCATGTGCATGTGTGTGTATCTGTATGTGAGTGTGTGCATGCATGTGTGTGCATCTATATCTGTGTGTCTACTTGTGTGTGAATGTGCATATGTGTATGTATGT
-----CATCTGCATCTGTGTGTCTACG-----
-----CATCTGCATCTGTGTGTCTAC-----
AGTGTGTGCATCTGCATCTGTGTGT-----
-----CATCTGCATCTGTGTGTCTA-----
-----CATCTGCATCTGTGTGTC-----
-----ATCTGCATCTGTGTGTCT-----
-----ACGTGTGTGTGCATGTGCATGT-----
-----ACGTGTGTGTGCATGTGCAT-----
-----ACGTGTGTGTGCATGTGCATG-----
-----ACGTGTGTGTGCATGTGCA-----
-----ACGTGTGTGTGCATGTGC-----
-----CTACGTGTGTGTGCATGTGC-----
-----ATGTATGT-----
-----TATGT-----
-----TATGT-----
-----GTAIGTATGT-----
-----TATGT-----
```

>mmu-mir-1957

```
ATACCATAACAGCTGGAAAGTAGCTCAGTGGTAGAGCATATGACCAGCATGTGCAAGGCCCTGAGTT species len reads
ATACCATAACAGCTGGAAAGT----- morL 21 1
-----GCTCAGTGGTAGAGCATATGACC----- mirL 23 30
-----CAGTGGTAGAGCATATGACC----- mirL 20 3
-----CAGTGGTAGAGCATATGAC----- mirL 19 1
-----TAGCTCAGTGGTAGAGCA----- mirL 18 1
-----GCTCAGTGGTAGAGCATATG----- mirL 20 1
-----AGCTCAGTGGTAGAGCATATGACC----- mirL 24 1
-----GCTCAGTGGTAGAGCATATGAC----- mirL 22 1
```

```

-----TAGCTCAGTGGTAGAGCATATGA----- mirL 23 1
-----GCATGTGCAAGGCCCTGA--- mirR 18 1
-----TGTGCAAGGCCCTGAGTT mirR 18 1

>mmu-mir-6691
TGTTTGTGCATGTGCGTATAGTTGTGTGTGCATGTATATGTGTGTATATGAATATACATATACATACACACCCATATATACACGCATTATATGAACACATCAACACACACGCAGGAAT species len reads
---TTGTGCATGTGCGTATAG----- morL 18 1
TGTTTGTGCATGTGCGTAT----- morL 19 1
-----AGTTGTGTGTGCATGTATATGT----- mirL 22 12
-----AGTTGTGTGTGCATGTATAT----- mirL 20 11
-----GTTGTGTGTGCATGTATATGT----- mirL 23 4
-----AGTTGTGTGTGCATGTATATG----- mirL 21 2
-----AGTTGTGTGTGCATGTATA----- mirL 19 2
-----GTTGTGTGTGCATGTATATGT----- mirL 21 1
-----GTTGTGTGTGCATGTATATGT----- mirL 22 1
-----GTTGTGTGTGCATGTATAT----- mirL 19 1
-----CATCAACACACACGCAGG--- mirR 18 3
-----TCAACACACACGCAGGAAT mirR 19 1
-----TCAACACACACGCAGGAA- mirR 18 1

>mmu-mir-759
ATTATAATAAATAAATGCCTAAACTGGCAGAGTGCAAACAATTTTGACTCAGATCTAAATGTTTGCAGTGGCTGTTTAAACATTTAATTTGTTCCAATGGAGGTAGCAGCACAGACTAAGCATGC species len
ATTATAATAAATAAATGC----- morL 19 1
-----CTAAACTGGCAGAGTGCAAAC----- mirL 21 2
-----GCCTAAACTGGCAGAGTG----- mirL 18 1
-----CTAAACTGGCAGAGTGCA----- mirL 18 1
-----TAGCAGCACAGACTAAGC--- mirR 18 15
-----TAGCAGCACAGACTAAGCA--- mirR 19 14
-----TAGCAGCACAGACTAAGCATGC mirR 22 2
-----GGTAGCAGCACAGACTAA----- mirR 18 1
-----TAGCAGCACAGACTAAGCATG- mirR 21 1
-----AGCAGCACAGACTAAGCA--- mirR 18 1
-----AGGTAGCAGCACAGACTAA----- mirR 19 1

>mmu-mir-3108
CGGCTGGACGTGAGACACAACCAGGGTCTCTAAAGCTAGACGTTCCGGAGAATTTTTTATTTTCGGCGTCTAGGTCTAGAGTCTCAAGGAAGTGCCAGTAT species len reads
CGGCTGGACGTGAGACACA----- morL 19 1
-----AGGGTCTCTAAAGCTAGACGTTCT----- mirL 23 1
-----AGGGTCTCTAAAGCTAGAC----- mirL 19 1
-----GTCTCTAAAGCTAGACGTTCCGG----- mirL 23 1
-----AGGGTCTCTAAAGCTAGACGTT----- mirL 22 1
-----GTCTCTAAAGCTAGACGTTCT----- mirL 20 1
-----GTCTCTAAAGCTAGACGTTCC----- mirL 21 1
-----TCAAGGAAGTGCCAGTA- mirR 18 32
-----TCAAGGAAGTGCCAGTAT mirR 19 1

```





-----AATCA  
-----TAATCA  
-----ATAATCA  
-----TAATCA  
-----AATCA  
-----TAATCA

>mmu-mir-743b

```
GAGGGCAGTATGTTGTGTGCAGTGTGTTTCAGACTGGTGTCCATCATGTGAAATATTTGTGAAAGACATCATGCTGAATAGAGTAAGGCCAT species len reads
GAGGGCAGTATGTTGTGTGC-----morL 20 1
-----GTGCTGTGTTTCAGACTGGTGTCT-----mirL 22 25
-----GTGCTGTGTTTCAGACTGGTGT-----mirL 20 3
-----GTGCTGTGTTTCAGACTGGTGTCC-----mirL 23 2
-----TGCTGTGTTTCAGACTGGT-----mirL 18 1
-----GTGCTGTGTTTCAGACTGGTGT-----mirL 21 1
-----GCAGTGTGTTTCAGACT-----mirL 18 1
-----GTCCATCATGTGAAATAT-----loop 18 1
-----TGAAAGACATCATGCTGA-----mirR 18 1
-----AAGACATCATGCTGAATA-----mirR 18 1
-----GAATAGAGTAAGGCCAT morR 18 1
```

>mmu-mir-3081

```
CAGACTGGAGCTTGGAGCGGTGAGCTGGACTCGGGCTTGGCGCTCCGATCTCTGAGCTGGGCTCTTGCCCGGAAT species len reads
CAGACTGGAGCTTGGAGC-----mirL 18 1
-----TTGCGCTCCGATCTCTGAGC-----mirR 20 8
-----TTGCGCTCCGATCTCTGAGCTG-----mirR 22 8
-----TTGCGCTCCGATCTCTGAGCTGG-----mirR 23 5
-----TGCCTCCGATCTCTGAGCTGGC-----mirR 24 2
-----TTGCGCTCCGATCTCTGAGCTGGC-----mirR 25 2
-----TTGCGCTCCGATCTCTGA-----mirR 18 2
-----TTGCGCTCCGATCTCTGAGCT-----mirR 21 1
-----TGCCTCCGATCTCTGAGC-----mirR 19 1
-----GCGCTCCGATCTCTGAGCTGGC-----mirR 23 1
-----TGCCTCCGATCTCTGAGCTGGG-----mirR 23 1
-----TGCCTCCGATCTCTGAGCTG-----mirR 21 1
-----TGCCTCCGATCTCTGAGCTGG-----mirR 22 1
-----TTGCGCTCCGATCTCTGAGCTGGGCT-----mirR 26 1
-----GCGCTCCGATCTCTGAGC-----mirR 18 1
-----TGGGCTCTTGCCCGGAAT morR 18 1
```

>mmu-mir-466j

```
ATTTCGTGTGTTTGTGCATGTGTATGTGTGCACATTTATGTGTGTGCATGTGTATGTATGTGTGTGCATGTGTGTAATTGTGTATATATGTGCATACATGTGTGTTTGTGTGCGT species len
ATTTCGTGTGTTTGTGCATGTGT-----morL 22 3
ATTTCGTGTGTTTGTGCATGTG-----morL 21 2
ATTTCGTGTGTTTGTGCATGT-----morL 20 2
--TCGTGTGTTTGTGCATGT-----morL 18 1
```

```

--TCGTGTGTTTGTGCATGTGTG----- morL 21 1
--TCGTGTGTTTGTGCATGTGTAT----- morL 24 1
-TTCGTGTGTTTGTGCATGTGT----- morL 21 1
-----TATGTGTGCACATTTATGTGT----- mirL 21 3
-----TATGTGTGCACATTTATGTGT----- mirL 22 2
-----ATACATGTGTGTGTTTGTG----- mirR 19 5
-----CATACATGTGTGTGTTTGTG----- mirR 20 3
-----CATACATGTGTGTGTTTGTGT----- mirR 21 3
-----CATACATGTGTGTGTTTGT----- mirR 18 3
-----ATACATGTGTGTGTTTGTGT----- mirR 20 2
-----ATACATGTGTGTGTTTGTGT----- mirR 21 1
-----TGCATACATGTGTGTGTTTGTG----- mirR 22 1
-----ATACATGTGTGTGTTTGTGTGCGT mirR 24 1
-----ATACATGTGTGTGTTTGT----- mirR 18 1

```

>mmu-mir-215

```

AATGACCTATGATTTGACAGACCGTGCAGCTGTGTATGTCTGTCACTTCTGTAGGCCAATATTCTGTATGTCACTGC species len reads
--ATGACCTATGATTTGACAGA----- mirL 20 10
--ATGACCTATGATTTGACAGACC----- mirL 22 9
--ATGACCTATGATTTGACAGAC----- mirL 21 5
AATGACCTATGATTTGAC----- mirL 18 2
--TGACCTATGATTTGACAGACCGT----- mirL 23 2
--TGACCTATGATTTGACAGACC----- mirL 21 2
--ATGACCTATGATTTGACAG----- mirL 19 2
AATGACCTATGATTTGACAGA----- mirL 21 1
-----ATATTCTGTATGTCACTGC mirR 19 2

```

>mmu-mir-1186b

```

CTCCTGCCTCTGCCTCCCAAGTGCCTGGGATTAAGGCATGCACCACTTTTGTGTAAGGAGCTGTGGTGCCTGACTGTGATCCAAAACCTGGAGGGGATACAGGAGAATCAAAGTT species len reads
-----GCCTCTGCCTCCCAAGTGCCTGGG----- morL 23 4
-----CTCTGCCTCCCAAGTGCCTG----- morL 19 3
-----TGCCCTCTGCCTCCCAAGTGC----- morL 20 2
-----GCCTCTGCCTCCCAAGTGCCTG----- morL 21 2
--CCTGCCTCTGCCTCCCAAGTGC----- morL 22 2
--CCTGCCTCTGCCTCCCAAGTGC----- morL 21 2
-----GCCTCTGCCTCCCAAGTGCCTGG----- morL 22 1
-----CCTCTGCCTCCCAAGTGCCTGG----- morL 21 1
--TCCTGCCTCTGCCTCCCAAGTGC----- morL 23 1
-----CTCTGCCTCCCAAGTGCCT----- morL 18 1
-----TCTGCCTCCCAAGTGCCTGGGA----- morL 21 1
-----TGCCCTCTGCCTCCCAAGTGCCTG----- morL 22 1
--CTGCCTCTGCCTCCCAAGTGC----- morL 21 1
CTCCTGCCTCTGCCTCCCAAGTGC----- morL 24 1
-----CCTCTGCCTCCCAAGTGCCT----- morL 20 1
-----GGATTAAAGGCATGCACC----- mirL 18 2
-----TGGGATTAAAGGCATGCACC----- mirL 20 2

```

```

-----GGATTAAGGCATGCACCACT----- mirL 21 1
-----GGATTAAGGCATGCACCAC----- mirL 20 1
-----TGGGATTAAGGCATGCA----- mirL 18 1
-----CTGGGATTAAGGCATGCAC----- mirL 20 1
-----ATACAGGAGAATCAAAAG-- mirR 18 2
-----ACAGGAGAATCAAAAGTT mirR 18 1

```

>mmu-mir-1969

```

TGATAGTGCTAGAGGCTGAAGATGGAGACTTTAACATGGGTGCTCTTAAATCTGTTAACATCCATGCTGCCTCCATTTCTGGTCTGTAGACATCACA species len reads
TGATAGTGCTAGAGGCTG----- morL 18 1
-----AAGATGGAGACTTTAACATGG----- mirL 21 9
-----AAGATGGAGACTTTAACATGGGT----- mirL 23 5
-----AAGATGGAGACTTTAACATG----- mirL 20 4
-----AAGATGGAGACTTTAACATGGG----- mirL 22 3
-----AAGATGGAGACTTTAACAT----- mirL 19 3
-----GATGGAGACTTTAACATGGGTG----- mirL 23 2
-----GATGGAGACTTTAACATGGGTG----- mirL 22 1
-----GAAGATGGAGACTTTAAC----- mirL 18 1
-----TCTGGTCTGTAGACATCACA mirR 20 2
-----ATTCTGGTCTGTAGACATCA-- mirR 21 1
-----TCTGGTCTGTAGACATCAC- mirR 19 1
-----TGGTCTGTAGACATCACA mirR 18 1

```

>mmu-mir-883b

```

GTGCAATGCATTACTGAGAATGGGTAGCAGTCACTTTGTACTATGAGTAACTGCAACATCTCTCAGTATTGTAAGGTTCAACAAATACAAGGGTGGTAGCCACATGGACATAGTCTTCACAC species len read
GTGCAATGCATTACTGAGAAT----- morL 21 1
-----GGGTAGCAGTCACTTTGT----- mirL 18 1
-----CAAATACAAGGGTGGTAGC----- mirR 19 13
-----CAAATACAAGGGTGGTAGCC----- mirR 20 10
-----CAAATACAAGGGTGGTAGCCA----- mirR 21 2
-----CAAATACAAGGGTGGTAGCCAC----- mirR 22 2
-----AACAAATACAAGGGTGGTA----- mirR 19 1
-----AAATACAAGGGTGGTAGCC----- mirR 19 1
-----CAAATACAAGGGTGGTAGCCACA----- mirR 23 1
-----CATGGACATAGTCTTCAC-- morR 18 1
-----ATGGACATAGTCTTCACAC morR 19 1

```

>mmu-mir-706

```

AGTTCAGGACAGCCAGGGCTATACAGAGAAACCCTGTCTCAAAAAACAAAAACAAACAAAATTACTTTTAGTAGGTTTATTTTGTTTT species len reads
AGTTCAGGACAGCCAGGGCTATACAGAGAAACC----- morL 34 5
-----AGGACAGCCAGGGCTATACAGAGAAACCCTGTC----- morL 33 2
-----GCCAGGGCTATACAGAGAAACCC----- morL 23 2
-----GGACAGCCAGGGCTATACAGAGAAACCCTGT----- morL 31 1
-----GCCAGGGCTATACAGAGAAACCCTGTC----- morL 27 1
-----CCAGGGCTATACAGAGAAACC----- morL 21 1
-----CCAGGACAGCCAGGGCTATACAGAGAAACC----- morL 30 1

```

```

-----GGCTATACAGAGAAACCCTGT----- morL 21 1
-----GGGCTATACAGAGAAACCCTGTC----- morL 23 1
-----AGCCAGGGCTATACAGAGAAACCC----- morL 24 1
-----CAGGGCTATACAGAGAAACCCT----- morL 22 1
-----GGACAGCCAGGGCTATACAGAGAAACCCTGTC----- morL 32 1
-----GTCTCAAAAAACAAAAA----- mirL 18 2
-----CTCAAAAAACAAAAAAC----- mirL 18 2
-----TCTCAAAAAACAAAAAA----- mirL 18 1
-----CTCAAAAAACAAAAAACAAAC----- mirL 22 1
-----CCTGTCTCAAAAAACAAAA----- mirL 19 1
-----CTCAAAAAACAAAAAACAA----- mirL 19 1
-----TCAAAAAACAAAAAACAAACA----- mirL 22 1
-----CCTGTCTCAAAAAACAAA----- mirL 18 1
-----GTCTCAAAAAACAAAAAAC----- mirL 20 1
-----AACAAACAAAATTACTTTT----- loop 19 1
-----TTAGTAGGTTTATTTTGTT----- mirR 19 2
-----TTAGTAGGTTTATTTTGTTT----- mirR 21 1
-----CTTTTAGTAGGTTTATTTTG----- mirR 20 1

```

>mmu-mir-1196

```

ATGCTGGTCTTGAACCTCACAGAAATCTACCTGCCTCTGCCTTCCAAGTACTGGGCAGTGTGCCACCAAACCCTACATTTTTGCTGGGCTGGGGGTGAGGGTGGTTTTTTTTTTTTTAAATA species len read
---TGGTCTTGAACCTCACAGAA----- morL 19 1
---CTGGTCTTGAACCTCACAG----- morL 18 1
ATGCTGGTCTTGAACCTCACAGAA----- morL 23 1
-----AAATCTACCTGCCTCTGCCT----- mirL 20 6
-----AAATCTACCTGCCTCTGCCTTCC----- mirL 23 3
-----AAATCTACCTGCCTCTGCCTTC----- mirL 22 3
-----AATCTACCTGCCTCTGCCTTC----- mirL 21 2
-----GAAATCTACCTGCCTCTGC----- mirL 19 1
-----AGAAATCTACCTGCCTCTGCC----- mirL 21 1
-----AAATCTACCTGCCTCTGCC----- mirL 19 1
-----ATCTACCTGCCTCTGCCT----- mirL 18 1
-----CAGAAATCTACCTGCCTC----- mirL 18 1
-----AATCTACCTGCCTCTGCCTTCC----- mirL 22 1
-----TCTACCTGCCTCTGCCTTCCA----- mirL 21 1
-----CAGAAATCTACCTGCCTCTG----- mirL 20 1
-----GAAATCTACCTGCCTCTGCCTTCC----- mirL 24 1
-----GTGGTTTTTTTTTTTTTTA----- mirR 18 3
-----GGTGGTTTTTTTTTTTTTTA----- mirR 19 2
-----GTTTTTTTTTTTTTTAAAT----- mirR 18 1
-----GGGTGGTTTTTTTTTTTTTT----- mirR 19 1
-----GTTTTTTTTTTTTTTAAATA----- mirR 19 1

```

>mmu-mir-677

```

GCCTTCAGTGATGATTAGCTTCTGACTTTCGTTCTTCTGAATTTGCTGAAGCCAGATGCCGTTCTGAGAAGGGGAAAATGGACAGAACTGAACATTTTTGAAGGCTGTTAATTTGGGAATGCAGAGATCTGAAATATTT
---TTCAGTGATGATTAGCTTCTGA-----

```

```
---TTCAGTGATGATTAGCTTCTGACT-----  
--CTTCAGTGATGATTAGCTTCTGA-----  
GCCTTCAGTGATGATTAGCTTCTGACT-----  
---TTCAGTGATGATTAGCTTCT-----  
--CTTCAGTGATGATTAGCT-----  
---TCAGTGATGATTAGCTTC-----  
-CCTTCAGTGATGATTAGC-----  
--CTTCAGTGATGATTAGCTTCT-----  
---TTCAGTGATGATTAGCTTC-----  
---TCAGTGATGATTAGCTTCT-----  
-----AATATTT  
-----ATATTT
```

>mmu-mir-568

```
GAAACAGTATACACTATATTATGTATAAATGTATACACACTTCTATATATGTCCACATATATGCGGTGTGTATTATACAGGTATAGGTGTGTGCACGCACACAGGTGCACATAGCATATCAAGTGTTTCAT specie  
-AACAGTATACACTATATTA----- morL 2  
-AACAGTATACACTATATTAT----- morL 2  
GAAACAGTATACACTATATTA----- morL 2  
---ACAGTATACACTATATTATGT----- morL 2  
-----ATAAATGTATACACACTTC----- mirL 1  
-----TAAATGTATACACACTTC----- mirL 1  
-----TATAAATGTATACACACT----- mirL 1  
-----ATAAATGTATACACACTT----- mirL 1  
-----ATAAATGTATACACACTTCT----- mirL 2  
-----ACGCACACAGGTGCACATAG----- mirR 2  
-----CACGCACACAGGTGCACAT----- mirR 1  
-----AGCATATCAAGTGTTTCAT morR 1
```

>mmu-mir-3094

```
GAACATTTATAGATTGTTGGGGACATTTTTAAAGCATGGATTGGTTATTGATTTGTCCTTTAAATTGTGTCCTCAAGT species len reads  
-AACATTTATAGATTGTTGG----- morL 19 1  
GAACATTTATAGATTGTTG----- morL 19 1  
-----TTGGGGACATTTTTAAAGCAT----- mirL 21 1  
-----GGGGACATTTTTAAAGCA----- mirL 18 1  
-----TTGGGGACATTTTTAAAGCATG----- mirL 22 1  
-----TGGGGACATTTTTAAAGCAT----- mirL 20 1  
-----GGGACATTTTTAAAGCATG----- mirL 19 1  
-----ATGGATTGGTTATTGATT----- loop 18 3  
-----TGGATTGGTTATTGATTT----- loop 18 2  
-----TCCTTTAAATTGTGTCCTC----- mirR 19 4  
-----TCCTTTAAATTGTGTCCTCAAGT mirR 23 4  
-----CCTTTAAATTGTGTCCTCA--- mirR 19 2  
-----TCCTTTAAATTGTGTCCTCAA-- mirR 21 2  
-----TCCTTTAAATTGTGTCCTCA--- mirR 20 2  
-----CCTTTAAATTGTGTCCTC--- mirR 18 2  
-----TCCTTTAAATTGTGTCCT----- mirR 18 1
```

```
-----TCCTTTAAATTGTGTCCTCAAG- mirR 22 1
-----TGTCCCTTTAAATTGTGTCC----- mirR 19 1
-----CTTTAAATTGTGTCCTCAA-- mirR 19 1
```

>mmu-mir-713

```
TCCGGAGGCCCTGATTGGTTAGTGAGACTTGATTGACATGAGCACCTCCCTTAGGGTTAGAGTGCCTGAAGGCACACAGCATAGGGCTTCCAAGATCGGGTTTCTTATCCAGGA species len reads
-CCGGAGGCCCTGATTGGT----- mirL 18 13
TCCGGAGGCCCTGATTGG----- mirL 18 11
TCCGGAGGCCCTGATTGG----- mirL 19 7
-----CGGGTTTCTTATCCAGGA mirR 18 1
```

>mmu-mir-1937b-4

```
ATCCCGGACGAGCCCCAAATGAAAGATCCCCAAAGGGAGATCCTCACTCAAGCCTCGGGATGTGGCGCGGACCCAAGAGAGACGCGGAGACCGAAATGGCGTACACACAAAGCCATTTAATAAAGCGGGGGGGGGGGGG
ATCCCGGACGAGCCCCAAATGA-----
-----AATAAAGCGGGGGGGGGGG-----
-----AATAAAGCGGGGGGGGGGG-----
-----AATAAAGCGGGGGGGGGGG-----
-----AATAAAGCGGGGGGGGGGG-----
-----AATAAAGCGGGGGGGGGGG-----
-----TAATAAAGCGGGGGGGGGGG-----
-----AATAAAGCGGGGGGGGGGG-----
-----AAAGCGGGGGGGGGGG-----
```

>mmu-mir-216b

```
AAATCTCTGCAGGCAAATGTGATGTCCTGAAGAAACCACACTTACCTGTAGAGATTCTTCAGTCTGACAACATCAAGCATCAAACCCCTTTATCAAGCAATGATTTTTCTAT species len reads
AAATCTCTGCAGGCAAATGTGA----- mirL 22 20
AAATCTCTGCAGGCAAATGT----- mirL 20 5
AAATCTCTGCAGGCAAATGT----- mirL 21 2
AAATCTCTGCAGGCAAAT----- mirL 18 2
AAATCTCTGCAGGCAAAT----- mirL 19 1
-----AAGCAATGATTTTTCTAT mirR 18 1
```

>mmu-mir-679

```
TTGGACTGTGAGGTGACTCTTGGTGTGTGATGGCTTTTCAGCAAGGTCCT species len reads
TTGGACTGTGAGGTGACTC----- mirL 19 7
TTGGACTGTGAGGTGACTCTTG----- mirL 22 6
TTGGACTGTGAGGTGACTCTTGG----- mirL 23 4
TTGGACTGTGAGGTGACTCTT----- mirL 21 4
-TGGACTGTGAGGTGACTCTTGG----- mirL 22 2
-TGGACTGTGAGGTGACTC----- mirL 18 2
---GACTGTGAGGTGACTCTTGG----- mirL 20 1
--GGACTGTGAGGTGACTCTTGG----- mirL 21 1
---GACTGTGAGGTGACTCTTGGT----- mirL 23 1
--GGACTGTGAGGTGACTCTTGGT----- mirL 22 1
TTGGACTGTGAGGTGACTCTTGGT----- mirL 27 1
-----GGCTTTTCAGCAAGGTCCT mirR 19 1
```

>mmu-mir-1937b-5

```
ATCCCGGACGAGCCCCAAATGAAAGATCCCCAAAGGGAGACCTCACTCAAGCCTCAGGATGTGGCGGGACCCAAGAGAGACGCGGAGACCGAAATGACGTACACACAAAGCTATTTAATAAAGCGGGGGGGGGGGGGG
ATCCCGGACGAGCCCCAAATGA-----
-----AATAAAGCGGGGGGGGGGG-----
-----AATAAAGCGGGGGGGGGGG-----
-----AATAAAGCGGGGGGGGGGG-----
-----AATAAAGCGGGGGGGGGGG-----
-----TAATAAAGCGGGGGGGGGGG-----
-----AAAGCGGGGGGGGGGGGG-----
-----AATAAAGCGGGGGGGGGGGGG-----
-----AAAGCGGGGGGGGGGGGG-----
```

>mmu-mir-216a

```
GATGGCTATGAGTTGGTTTAAATCTCAGCTGGCAACTGTGAGATGTCCCTATCATTCTCACAGTGGTCTCTGGGATTAT species len reads
GATGGCTATGAGTTGGTT-----morL 18 1
-----TAATCTCAGCTGGCAACTGTGAGA-----mirL 24 6
-----TAATCTCAGCTGGCAACTGTGA-----mirL 22 5
-----TAATCTCAGCTGGCAACTGTG-----mirL 21 4
-----AATCTCAGCTGGCAACTGTGA-----mirL 21 1
-----TAATCTCAGCTGGCAACTGT-----mirL 20 1
-----AATCTCAGCTGGCAACTGTGAG-----mirL 22 1
-----AATCTCAGCTGGCAACTGTG-----mirL 20 1
-----AATCTCAGCTGGCAACTGTGAGA-----mirL 23 1
-----AATCTCAGCTGGCAACTGT-----mirL 19 1
-----TAATCTCAGCTGGCAACTG-----mirL 19 1
-----AGATGTCCCTATCATTCC-----loop 18 1
-----TCCTCACAGTGGTCTCTGG-----mirR 19 2
-----TCCTCACAGTGGTCTCTG-----mirR 18 1
-----TCACAGTGGTCTCTGGGATTAT-----mirR 22 1
-----TCCTCACAGTGGTCTCTGGG-----mirR 20 1
-----TCACAGTGGTCTCTGGGA-----mirR 18 1
```

>mmu-mir-3070b

```
GGGATCCTCCCATGATCTTCTGGTGCTATGGTCAGGGGTAGA species len reads
GGGATCCTCCCATGATC-----loop 18 1
-----TGGTGCTATGGTCAGGGGTAG-----mir 21 16
-----TGGTGCTATGGTCAGGGGTA-----mir 20 3
-----TGGTGCTATGGTCAGGGGTAGA-----mir 22 2
-----GGTGCTATGGTCAGGGGTAG-----mir 20 2
-----TGGTGCTATGGTCAGGGGT-----mir 19 1
-----CTGGTGCTATGGTCAGGGGTAGA-----mir 23 1
-----CTGGTGCTATGGTCAGGGGTAG-----mir 22 1
-----CTGGTGCTATGGTCAGGG-----mir 18 1
-----TCTGGTGCTATGGTCAGGG-----mir 19 1
```



>mmu-mir-1965

```
CTGGGATTAAAGGCTTGCGCCACCATGCCTGGCTCTTTTGTGTTTGTGTTTATTGTGATCCTAGATCCCATCATGTGAACATCTAGATTTAGCATCACAATCAGGAACCTGTAAGCCGGGCCGTAGTGGCGCAAGCCTTTAAT
CTGGGATTAAAGGCTTGCGCCACC-----
-----CCATGCCTGGCTCTTTTG-----
-----CATGCCTGGCTCTTTTGT-----
-----
-----AGCCTTTAAT
-----AGCCTTTAAT
-----AGCCTTTAAT
-----AGCCTTTAAT
-----AGCCTTTAAT
-----AGCCTTTAAT
-----AAGCCTTTAAT
-----CAAGCCTTTAAT
-----
-----
-----
```

>mmu-mir-1931

```
GGCCAGAAGCATTAACTCTTTGAATGCTGCTCGTCAAAGATCTGTTGCAGAGCCTTTGAATTGAAGCTGCTTTAAATTCGAATGCAAGGGCTGGTGGCATGGCTCAGTGGGTAGGAGCGCCCGACTGCTCTTCCAAAGGT
GGCCAGAAGCATTAACTCTTTGAA-----
-----ACTGCTCTTCCAAAGGT
-----ACTGCTCTTCCAAAGGT
-----GACTGCTCTTCCAAAGGT
-----ACTGCTCTTCCAAAGGT
-----GACTGCTCTTCCAAAGGT
-----ACTGCTCTTCCAAAGGT
-----CCGACTGCTCTTCCAAAGGT
-----ACTGCTCTTCCAAAGGT
-----GACTGCTCTTCCAAAGGT
-----GCTCTTCCAAAGGT
-----ACTGCTCTTCCAAAGGT
-----GACTGCTCTTCCAAAGGT
```

>mmu-mir-1966

```
TAGAATAGTGTGGAAGGGAGCTGGCTCAGGAGAGAGTCCTGAGATTTAGGCTCTTTCTGACTCAACTCTCCCTTAGC species len reads
TAGAATAGTGTGGAAGGG----- morL 19 1
-----TGGCTCAGGAGAGAGTCC----- mirL 18 9
-----TGGCTCAGGAGAGAGTCCT----- mirL 19 3
-----CTGAGATTTAGGCTCTTT----- loop 18 1
-----TTTCTGACTCAACTCTCCCTTA-- mirR 22 5
-----TTTCTGACTCAACTCTCCCTT--- mirR 21 4
-----TTTCTGACTCAACTCTCC----- mirR 18 2
-----TTTCTGACTCAACTCTCCC----- mirR 19 1
-----TTTCTGACTCAACTCTCCCTTAG- mirR 22 1
-----TTTCTGACTCAACTCTCCC----- mirR 18 1
-----TTTCTGACTCAACTCTCCCTTAGC mirR 24 1
```

>mmu-mir-467d

```
ATAAGTGC GCGCATGTATATGCG species len reads
-TAAGTGC GCGCATGTATATAT--- mirL 19 8
-TAAGTGC GCGCATGTATATATGC- mirL 21 7
-TAAGTGC GCGCATGTATATATGCG mirL 22 3
--AAGTGC GCGCATGTATATATGC- mirL 20 2
-TAAGTGC GCGCATGTATATATG-- mirL 20 2
ATAAGTGC GCGCATGTATATATAT--- mirL 18 2
-TAAGTGC GCGCATGTATATATAT--- mirL 18 1
ATAAGTGC GCGCATGTATATATATGC- mirL 22 1
--AAGTGC GCGCATGTATATATAT--- mirL 18 1
ATAAGTGC GCGCATGTATATATAT--- mirL 19 1
```

>mmu-mir-4661

```
GTGATGACCCCTATGTATGTGCATGTGTGTTGTGTGTACATGTACATGTATATATATATATTTGATATACATATAAATACATGCACACATATTCATGCATGCACACGCAC species len reads
----TGACCCCTATGTATGTGC----- morL 18 2
GTGATGACCCCTATGTATGT----- morL 20 1
-----CATGTGTGTTTGTGTGTAC----- mirL 19 3
-----TAAATACATGCACACATA----- mirR 18 7
-----TAAATACATGCACACATATTC----- mirR 21 3
-----TAAATACATGCACACATAT----- mirR 19 2
-----ATAAATACATGCACACAT----- mirR 18 2
-----TAAATACATGCACACATAT----- mirR 20 2
-----ATAAATACATGCACACATAT----- mirR 21 2
-----TAAATACATGCACACATATTC----- mirR 22 1
-----AATACATGCACACATATTC----- mirR 19 1
-----ATTCATGCATGCACACGCAC----- morR 19 1
-----TCATGCATGCACACGCAC----- morR 18 1
```

>mmu-mir-1894

```
GTCTTTGTTCTCTCTCCCTACCACCTGCCTCTTCCCTGCTGTGGAGCAGGCAAGGGAGAGGGTGAAGGGAGGGCCAGCCAGTGAGGATTTTGACGGTTAACCT species len reads
GTCTTTGTTCTCTCTCTCCCT----- mirL 19 9
GTCTTTGTTCTCTCTCTCCCT----- mirL 18 6
GTCTTTGTTCTCTCTCTCCCT----- mirL 20 4
-TCTTTGTTCTCTCTCTCCCT----- mirL 18 3
-TCTTTGTTCTCTCTCTCCCT----- mirL 19 1
--CTTTGTTCTCTCTCTCCCT----- mirL 18 1
----TTGTTCTCTCTCTCCCTTAC----- mirL 18 1
--CTTTGTTCTCTCTCTCCCTTAC----- mirL 20 1
-----ATTTTGACGGTTAACCT----- mirR 18 1
```

>mmu-mir-1895

```
TCTTGCCCGGGTTGGCTCCGCCAGCTCCCCCGAGGAGGACGAGGAGGAGGAGGAATGATTCTGCGGGCAGTCTGC species len reads
TCTTGCCCGGGTTGGCT----- mirL 18 1
-----GAGGAGGACGAGGAGGAGGAGGA----- mirR 23 5
```

```
-----GAGGAGGACGAGGAGGAGGAG----- mirR 21 4
-----AGGAGGACGAGGAGGAGGAGGAAT----- mirR 24 2
-----GAGGACGAGGAGGAGGAGGAAT----- mirR 22 2
-----GAGGAGGACGAGGAGGAGGAGGAA----- mirR 24 2
-----AGGAGGACGAGGAGGAGG----- mirR 18 1
-----CCGAGGAGGACGAGGAGG----- mirR 18 1
-----GAGGAGGACGAGGAGGAGGA----- mirR 20 1
-----AGGAGGACGAGGAGGAGGAGG----- mirR 21 1
-----GGAGGACGAGGAGGAGGAGGA----- mirR 21 1
-----AGGAGGACGAGGAGGAGGAGGAA----- mirR 23 1
-----CGAGGAGGACGAGGAGGAGGAGG----- mirR 23 1
-----CCCGAGGAGGACGAGGAGGAGG----- mirR 22 1
-----TGATTCTGCGGGCAGTCTGC morR 20 2
-----TGATTCTGCGGGCAGTCT-- morR 18 1
```

>mmu-mir-1905

```
GATGGTCACTTGGCCTGGCAGAGCAGGGGCCACGCCAAAGGC species len reads
-ATGGTCACTTGGCCTGGC----- mirR 18 18
-ATGGTCACTTGGCCTGGCA----- mirR 19 6
GATGGTCACTTGGCCTGG----- mirR 18 2
-----AGCAGGGGCCACGCCAAAGGC morR 21 1
```

>mmu-mir-1906-1

```
GAGATGTCCTTTTGGGGTAGTGGGGACATTAGGAGCAACCTCCTAGGGTTGTTGTGAGAATTAATGAAGTGCAGCAGCCTGAGGCAGGGCTGGGCAGAGACCTCAGCACATGTTTGTGAAAGGTTTGCAGGTGGATCT
-----TTTGGGGTAGTGGGGACA-----
-----GGGGTAGTGGGGACATTA-----
GAGATGTCCTTTTGGGGTAGTGGGGACATTAGGA-----
-----GGGGTAGTGGGGACATTAGGA-----
-----TGGGGTAGTGGGGACATT-----
-----GAGCAACCTCCTAGGGTTGTTGTG-----
-----GGAGCAACCTCCTAGGGT-----
-----AAAGGTTTGCAGGTGGAT--
-----AAAGGTTTGCAGGTGGATC-
-----GAAAGGTTTGCAGGTGGATCT
-----AAAGGTTTGCAGGTGGATCT
-----AAAGGTTTGCAGGTGGATCT
```

>mmu-mir-881

```
AAATTGTGTGCAGTACAATATTCAGAGAGATAACAGTCACATCTTTTCTAAAGTAACTGTGTCTTTTCTGAATAGAGTAATGTTACCAAAAACAG species len reads
AAATTGTGTGCAGTACAA----- morL 18 1
-----ATATTCAGAGAGATAACA----- mirL 18 15
-----ATATTCAGAGAGATAACAG----- mirL 19 3
-----TTCAGAGAGATAACAGTC----- mirL 18 1
-----TATTCAGAGAGATAACAG----- mirL 18 1
-----AATATTCAGAGAGATAAC----- mirL 18 1
-----ATTCAGAGAGATAACAGT----- mirL 18 1
```

```
-----CAATATTCAGAGAGATAACA----- mirL 20 1
-----TAATGTTACCAAAAACA- mirR 18 1
-----AATGTTACCAAAAACAG mirR 18 1

>mmu-mir-291b
TCAAAGTGGAGGCCCTCTCCGCGGCTTGGCGGAAAGTGCATCCATTTTGTCTCTGTGTGTACATGGCGTCTGAAAA species len reads
TCAAAGTGGAGGCCCTCTCC----- mirL 20 4
TCAAAGTGGAGGCCCTCTCC----- mirL 21 1
-----TCTGTGTGTACATGGCGTCTGA--- mirR 22 7
-----TCTGTGTGTACATGGCGTC----- mirR 19 3
-----TCTGTGTGTACATGGCGT----- mirR 18 3
-----TCTGTGTGTACATGGCGTCTG--- mirR 21 3
-----TCTGTGTGTACATGGCGTCT--- mirR 20 2
-----TCTGTGTGTGTACATGGCG----- mirR 19 1
-----GTGTGTACATGGCGTCTGAAAA mirR 22 1

>mmu-mir-1952
ATATTGCAGCCACCTATCCCTCTCTTATTGATCTCCACCCTCTTCTGTGCAGGCTTATTCTCTGTCCAAGTGTGGATGACAAAAGAGATGGAAGTATGGGGGGCGGGAGGGCACAC species len reads
ATATTGCAGCCACCTATCCCT----- morL 21 1
-----TCTTATTGATCTCCACCC----- mirL 18 16
-----TCTTATTGATCTCCACCCTC--- mirL 20 1
-----TCTTATTGATCTCCACCCT----- mirL 19 1
-----GGGGGGCGGGAGGGCACA- mirR 18 4
-----ATGGGGGGCGGGAGGGC----- mirR 18 1
-----GGGGGGCGGGAGGGCACAC mirR 18 1

>mmu-mir-466p
CATCGATCTATGTGACTGTGAGC species len reads
-ATCGATCTATGTGACTGTGA-- mirR 20 13
-ATCGATCTATGTGACTGTGAG- mirR 21 3
-ATCGATCTATGTGACTGTGAGC mirR 22 2
-ATCGATCTATGTGACTGT---- mirR 18 2
CATCGATCTATGTGACTGTG--- mirR 20 1
-ATCGATCTATGTGACTGTG--- mirR 19 1
CATCGATCTATGTGACTGTGA-- mirR 21 1
---CGATCTATGTGACTGTGA-- mirR 18 1

>mmu-mir-2145-1
CATACCACCTGAACATGCTTGATCCCATCTGATCTCAGAAGCCGAGCAGGGTCTGGCCCTGGTTAATGCATAGACGTGGAATCCTATTGGATGTACCTTTTGTGTCTGGCTTATGTGACCTTAC species len re
-ATACCACCTGAACATGC----- mirL 18 3
-ATACCACCTGAACATGCT----- mirL 19 3
CATACCACCTGAACATG----- mirL 18 1
-----TCTGGCTTATGTGACCTTAC mirR 20 15
-----TCTGGCTTATGTGACCTTA- mirR 19 1

>mmu-mir-761
```

```

GGATGGCAAGTGGAGGAGCAGCAGGGTGAACACTGACACAGTGTGGTGGAGTTTCACTTTGCTGCTCCTCCT species len reads
GGATGGCAAGTGGAGGAGCA-----AGCAGGGTGAACACTGACA-----TTCACCTTTGCTGCTCCTCCT-- morL 20 1
-----AGCAGGGTGAACACTGACA-----TTCACCTTTGCTGCTCCTCCT-- mirR 18 7
-----TTCACCTTTGCTGCTCCTCCT-- mirR 20 7
-----TTCACCTTTGCTGCTCCTCCT-- mirR 19 5
-----TTCACCTTTGCTGCTCCTCCT-- mirR 19 2

```

>mmu-mir-1946a

```

TCTATAGCCGGGCAGTGGTGGCAGCAGCTTTTAATCCCAACTTGTGAGGCACAGGCAGGTGGATTTCTGATCAAAGGCATGCGCCACCACTCTCGGCTTTCTCCTCCTTTTT species len reads
-----AGCCGGGCAGTGGTGGCAG-----GCACACACTTTTAATCCC-----GCACACACTTTTAATCCC-----GCACACACTTTTAATCCCA-----AGGCATGCGCCACCACTCTCGGCTTTCTCCTCCTTTTT morL 19 1
TCTATAGCCGGGCAGTGGTGGC-----CACACACTTTTAATCCCA-----GCACACACTTTTAATCCC-----GCACACACTTTTAATCCCA-----AGGCATGCGCCACCACTCTCGGCTTTCTCCTCCTTTTT morL 22 1
-----CACACACTTTTAATCCCA-----GCACACACTTTTAATCCC-----GCACACACTTTTAATCCCA-----AGGCATGCGCCACCACTCTCGGCTTTCTCCTCCTTTTT mirL 18 8
-----GCACACACTTTTAATCCC-----GCACACACTTTTAATCCCA-----AGGCATGCGCCACCACTCTCGGCTTTCTCCTCCTTTTT mirL 18 6
-----CACACACTTTTAATCCCA-----AGGCATGCGCCACCACTCTCGGCTTTCTCCTCCTTTTT mirL 19 2
-----AGGCATGCGCCACCACTCTCGGCTTTCTCCTCCTTTTT mirR 18 2
-----AAAGGCATGCGCCACCACTCTCGGCTTTCTCCTCCTTTTT mirR 19 1
-----CATGCGCCACCACTCTCGGCTTTCTCCTCCTTTTT morR 18 1
-----CGGCTTTCTCCTCCTTTTT morR 21 1

```

>mmu-mir-694

```

AACTGGGAGTCAAAGGCCAGCTCAGGCATCGCTTTCAACCCAAGACCAGGCTGAAAATGTTGCCTGAAGCAGTCTC species len reads
AACTGGGAGTCAAAGGCC-----TCAGGCATCGCTTTCAAC-----TCAGGCATCGCTTTCAAC-----TCAGGCATCGCTTTCAACCCA-----TCAGGCATCGCTTTCAACCC-----AATGTTGCCTGAAGCAGTCTC morL 18 1
-----TCAGGCATCGCTTTCAAC-----TCAGGCATCGCTTTCAAC-----TCAGGCATCGCTTTCAACCCA-----TCAGGCATCGCTTTCAACCC-----AATGTTGCCTGAAGCAGTCTC mirL 18 4
-----TCAGGCATCGCTTTCAAC-----TCAGGCATCGCTTTCAACCCA-----TCAGGCATCGCTTTCAACCC-----AATGTTGCCTGAAGCAGTCTC mirL 19 2
-----TCAGGCATCGCTTTCAACCCA-----TCAGGCATCGCTTTCAACCC-----AATGTTGCCTGAAGCAGTCTC mirL 21 2
-----TCAGGCATCGCTTTCAACCC-----AATGTTGCCTGAAGCAGTCTC mirL 20 1
-----AATGTTGCCTGAAGCAGTCTC mirR 19 7
-----AATGTTGCCTGAAGCAGTCTC mirR 18 2
-----GAAAATGTTGCCTGAAGC-----AAAATGTTGCCTGAAGCA-----GTTGCCTGAAGCAGTCTC mirR 18 1
-----AAAATGTTGCCTGAAGCA-----GTTGCCTGAAGCAGTCTC mirR 18 1
-----GTTGCCTGAAGCAGTCTC mirR 18 1
-----TGTTGCCTGAAGCAGTCTC mirR 18 1

```

>mmu-mir-880

```

CAAACCTGTGTGCACTGCAATACTCAGATTGATATGAGTCACTTCCTATTGCATGTTACTCCATCCTCTCTGAGTAGAGTAAGGCACACCAATCACCAGTT species len reads
CAAACCTGTGTGCACTGCAA-----ATACTCAGATTGATATGAG-----ATACTCAGATTGATATGA-----CTCAGATTGATATGAGTC-----CAATACTCAGATTGATAT-----TACTCAGATTGATATGAG-----TCCTCTCTGAGTAGAGTA-----TCTCTGAGTAGAGTAAGG-----TCTCTGAGTAGAGTAAGGCA-----GGCACACCAATCACCAGTT morL 19 1
-----ATACTCAGATTGATATGAG-----ATACTCAGATTGATATGA-----CTCAGATTGATATGAGTC-----CAATACTCAGATTGATAT-----TACTCAGATTGATATGAG-----TCCTCTCTGAGTAGAGTA-----TCTCTGAGTAGAGTAAGG-----TCTCTGAGTAGAGTAAGGCA-----GGCACACCAATCACCAGTT mirL 19 10
-----ATACTCAGATTGATATGA-----CTCAGATTGATATGAGTC-----CAATACTCAGATTGATAT-----TACTCAGATTGATATGAG-----TCCTCTCTGAGTAGAGTA-----TCTCTGAGTAGAGTAAGG-----TCTCTGAGTAGAGTAAGGCA-----GGCACACCAATCACCAGTT mirL 18 4
-----CTCAGATTGATATGAGTC-----CAATACTCAGATTGATAT-----TACTCAGATTGATATGAG-----TCCTCTCTGAGTAGAGTA-----TCTCTGAGTAGAGTAAGG-----TCTCTGAGTAGAGTAAGGCA-----GGCACACCAATCACCAGTT mirL 18 1
-----CAATACTCAGATTGATAT-----TACTCAGATTGATATGAG-----TCCTCTCTGAGTAGAGTA-----TCTCTGAGTAGAGTAAGG-----TCTCTGAGTAGAGTAAGGCA-----GGCACACCAATCACCAGTT mirL 18 1
-----TACTCAGATTGATATGAG-----TCCTCTCTGAGTAGAGTA-----TCTCTGAGTAGAGTAAGG-----TCTCTGAGTAGAGTAAGGCA-----GGCACACCAATCACCAGTT mirL 18 1
-----TCCTCTCTGAGTAGAGTA-----TCTCTGAGTAGAGTAAGG-----TCTCTGAGTAGAGTAAGGCA-----GGCACACCAATCACCAGTT mirR 18 2
-----TCTCTGAGTAGAGTAAGG-----TCTCTGAGTAGAGTAAGGCA-----GGCACACCAATCACCAGTT mirR 18 1
-----TCTCTGAGTAGAGTAAGGCA-----GGCACACCAATCACCAGTT morR 20 1
-----GGCACACCAATCACCAGTT morR 19 1

```

```
>mmu-mir-3113
CTGGCCCTGGCCCGGGTCTGGCCCTGGTCCGGGTCTGGCCCTGGTCTGGCCCTGGTCTGGCCCTGGCCCTGGCCCGGGCCCTGGCCCTGGTCTGGCCCTGGA species len reads
CTGGCCCTGGCCCGGGT-----
-----GTCCTGGCCCTGGTCCGGGTCC-----
-----TCCTGGCCCTGGTCCGGGTCC-----
-----GTCCTGGCCCTGGTCCGGGTCC-----
-----GTCCTGGCCCTGGTCCGGGT-----
-----GTCCTGGCCCTGGTCCGG-----
-----GTCCTGGCCCTGGTCCGGTCT-----
-----CCTGGTCTGGCCCTGGA mirR 18 2
```

```
>mmu-mir-3112
TCATCACAAACATCTAAATGAACAGTGACATAGAAAAGCAGTCTGCATTATTCTGGAGCTGCAGTTGTCTCTTCTTGTCTCTGTCTCAGTTGGTTGCTCCA species len reads
TCATCACAAACATCTAAATG-----
-----GAACAGTGACATAGAAAAG-----
-----GAACAGTGACATAGAAAAG-----
-----TCTGTCTCAGTTGGTTGCTC-----
-----TCTGTCTCAGTTGGTTGCTCCA mirR 21 5
-----TCTGTCTCAGTTGGTTGCTCC-----
-----TCTGTCTCAGTTGGTTGCTC-----
-----CTGTCTCAGTTGGTTGCTCCA mirR 20 1
-----CTGTCTCAGTTGGTTGCTC-----
-----TGTCAGTTGGTTGCTCCA mirR 19 1
-----CTGTCTCAGTTGGTTGCTCC-----
```

```
>mmu-mir-1940
AGCCAGGATGCAGCCTGCTATGGAGGACTGAGAAGGTGGAGCAGTTCTGTACCGTGCTGCCTTCCATTGGTTAAGACCTCCAACAGTAAAGGGCTGGCCGGCCAAAGAATGTCTCTATCACCGTGGAGGGGCAGCACT
AGCCAGGATGCAGCCTGC-----
-----ATGGAGGACTGAGAAGGTGGAGC-----
-----GGAGGACTGAGAAGGTGGA-----
-----ATGGAGGACTGAGAAGGTGGAGCAGTTCTGT-----
-----TGGAGGACTGAGAAGGTGGAGC-----
-----TATGGAGGACTGAGAAGGTG-----
-----GGAGGACTGAGAAGGTGGAGCAGTTCTGT-----
-----TGGAGGACTGAGAAGGTGGAGCAGTTCTGT-----
-----AGCACT
-----ACT
-----AGCACT
-----GCAGCACT
```

```
>mmu-mir-547
GTAGTGTGTGATGTATCACTTGAGGATGTACCACCCATTTAACAGGAAACATGCTTGGTACATCTTTGAGTGAGATAACACACAACAGCTACCAC species len reads
--AGTGTGTGATGTATCACTTG-----
GTAGTGTGTGATGTATCACT-----
--AGTGTGTGATGTATCACTTGA-----
-----morL 20 2
-----morL 20 1
-----morL 21 1
```

```

-----TGAGGATGTACCACCCAT----- mirL 18 4
-----TGAGGATGTACCACCCATT----- mirL 19 2
-----CTTGGTACATCTTTGAGTGAG----- mirR 21 4
-----CTTGGTACATCTTTGAGTGAGA----- mirR 22 3
-----CTTGGTACATCTTTGAGTGAGAT----- mirR 23 2
-----TAACACACAACAGCTACCA----- morR 19 1
-----ACACACAACAGCTACCAC----- morR 18 1

```

>mmu-mir-1948

```

GGCAGAATTCTCACCTTACTATATGAGTATTCTGCCTAAATGTGGTGTACGGATACATTTAGGCAGAGCACTCGTACAGTAAGGTGAGAATCAGGAAATCTGTAATAAAAACAG species len reads
GGCAGAATTCTCACCTTA----- morL 18 9
-----TATATGAGTATTCTGCCTA----- mirL 19 2
-----ATATGAGTATTCTGCCTAA----- mirL 19 1
-----TATGAGTATTCTGCCTAAA----- mirL 19 1
-----ATATGAGTATTCTGCCTAAATG----- mirL 22 1
-----TATATGAGTATTCTGCCTAA----- mirL 20 1
-----GTACAGTAAGGTGAGAATC----- mirR 19 3
-----CAGTAAGGTGAGAATCAG----- mirR 18 1
-----AAATCTGTAATAAAAACAG----- morR 19 1
-----GAAATCTGTAATAAAAAC----- morR 18 1

```

>mmu-mir-3088

```

AAGCCAGGACCTCAGTGCCTGCTATGCAGTTGTTTCATGAGCTCTGGCTCCGAAGGTTTCATGAGCAGCTGCAAAGGTGTTGCTGCTGTCAAGAACACTT species len reads
AAGCCAGGACCTCAGTGC----- morL 18 1
-----GCTATGCAGTTGTTTCATGAGCTC----- mirL 23 3
-----GCTATGCAGTTGTTTCATGAGCT----- mirL 22 1
-----TGCTATGCAGTTGTTTCATGAGC----- mirL 22 1
-----CTCTGGCTCCGAAGGTTTC----- loop 18 1
-----TCATGAGCAGCTGCAAAGGTGT----- mirR 22 3
-----TTCATGAGCAGCTGCAAAGGT----- mirR 21 3
-----TCATGAGCAGCTGCAAAGGT----- mirR 20 2
-----TTCATGAGCAGCTGCAAAGGTGT----- mirR 23 2
-----TTCATGAGCAGCTGCAAAGGTG----- mirR 22 1
-----TTCATGAGCAGCTGCAA----- mirR 18 1
-----GCTGCTGTCAAGAACACTT----- morR 19 1

```

>mmu-mir-367

```

GCCGTCAGTGTGCTAACATGCAACTCTGTTGAATAGAAATTGGAATTGCACCTTAGCAATGGTGATGGACCTGTGTCAGTGGCCACTTACT species len reads
GCCGTCAGTGTGCTAAC----- mirL 18 1
-----TTTAGCAATGGTGATGGA----- mirR 18 6
-----CTGTGTCAGTGGCCACTTACT----- morR 21 5
-----CTGTGTCAGTGGCCACTTA----- morR 19 4
-----CTGTGTCAGTGGCCACTTAC----- morR 20 2
-----CTGTGTCAGTGGCCACTT----- morR 18 1
-----ACCTGTCAGTGGCCAC----- morR 18 1

```

>mmu-mir-1898

```
AGTTTACTGTTTTGTATGAACATAGGTCAAGGTTACAGGGGATCAAGAAATATTATTCTTGATAATCTGTT species len reads
AGTTTACTGTTTTGTATG----- morL 18 1
-----ATAGGTCAAGGTTACAG----- mirL 18 11
-----AGGTCAAGGTTACAGGGGA----- mirL 20 2
-----ATTCTTGATAATCTGTT----- mirR 18 3
-----TATTCTTGATAATCTGT----- mirR 18 2
```

>mmu-mir-695

```
AGAAAACTTCACGAGGAATCCTAGATTGGGCATAGGTGACTGAAGTACACAGCTGCCTTCTTACAAAGGCACTGGTTACCTTGGTCTGGTCACCGGCTCGGCTATCTGCTACTCGGTGGAACACCCCCAG species
AGAAAACTTCACGAGGA----- morL 18
---AAACTTCACGAGGAATC----- morL 18
-----CTAGATTGGGCATAGGTG----- mirL 18
-----TACTCGGTGGAACACCCC--- mirR 18
-----TACTCGGTGGAACACCCCCA- mirR 20
-----TACTCGGTGGAACACCCCC-- mirR 19
-----GCTACTCGGTGGAACACC---- mirR 18
-----TACTCGGTGGAACACCCCCAG mirR 21
-----TGCTACTCGGTGGAACACCCCC-- mirR 22
```

>mmu-mir-1960

```
GCCAGTGCTGTTAGAAGAGGGCTGAGAGCAGGGAGAGCTCTCTTCTGCAGCACTGACTTTTCTCTGCATTGGCACATTTTGAACACACCTAATAAAGAGCTCTGGTGG species len reads
--CAGTGCTGTTAGAAGAGGGC----- mirL 20 7
---AGTGCTGTTAGAAGAGGGC----- mirL 19 1
--CAGTGCTGTTAGAAGAGGGCT----- mirL 21 1
-CCAGTGCTGTTAGAAGAGG----- mirL 19 1
-CCAGTGCTGTTAGAAGAGGGCT----- mirL 22 1
GCCAGTGCTGTTAGAAGA----- mirL 18 1
-----ATTGGCACATTTTGAACACA----- mirR 20 3
-----ATTGGCACATTTTGAACACAC----- mirR 21 1
-----TTGGCACATTTTGAACAC----- mirR 18 1
-----AATAAAGAGCTCTGGTGG morR 18 1
```

>mmu-mir-1928

```
TGTAGGCAAGTGCTCTACCACTGAGCTACATTGCCAGCTCTAACCCCAACTTGTAAGAAGAAAA species len reads
TGTAGGCAAGTGCTCTACCAC----- loop 21 2
-----AGTGCTCTACCACTGAGC----- loop 18 1
-----GGCAAGTGCTCTACCACTGAGC----- loop 22 1
-----AAGTGCTCTACCACTGAGCT----- loop 20 1
-----GCTACATTGCCAGCTCTAAC----- mirR 20 3
-----AGCTACATTGCCAGCTCT----- mirR 18 3
-----GCTACATTGCCAGCTCTAA----- mirR 19 3
-----GCTACATTGCCAGCTCTA----- mirR 18 2
-----AACCCCAACTTGTAAGA----- morR 18 1
-----CCAACTTGTAAGAAGAAAA morR 20 1
```



>mmu-mir-684-1

```
ATCTGTCTTTAAGTAGGGATAAATTACTCTTGAACAAAATGATCCTAGATAGTTTTCCCTTCAAGTCAAGCGTCTTGCTGTTTAAATAAACTTCTTGTT species len reads
ATCTGTCTTTAAGTAGGGA----- mirL 19 1
--CTGTCTTTAAGTAGGGATA----- mirL 19 1
-----CTTCAAGTCAAGCGTCTTGC----- mirR 20 10
-----CTTCAAGTCAAGCGTCTTGCTG----- mirR 22 1
-----CTTCAAGTCAAGCGTCTTG----- mirR 19 1
-----CCCTTCAAGTCAAGCGTCT----- mirR 19 1
-----CTTCAAGTCAAGCGTCTTGCT----- mirR 21 1
-----TTTAAATAAACTTCTTGTT morR 19 1
-----GTTTAAATAAACTTCTTG-- morR 18 1
```

>mmu-mir-703

```
TTAAGTTTAAATAAAAGTAAAAGACTGGTAAATGATAACAATGCATCATAAAACCTTCAGAAGGAAAGAATGTTGTGGACCATTTTTTTTGTGTGTGGCAGTTTTAAGTTATTAGTTTTCAAAAATCAGTACTTTTTAATGG
TTAAGTTTAAATAAAAGTAAA-----
-----AGACTGGTAAATGATAACA-----
```

>mmu-mir-1933

```
CACAGTCATGGTGTTCGGTCTTAGTTTGTGACCAGTTTAGTTTAAACCAGGACCATCAGTGTGACTAT species len reads
CACAGTCATGGTGTTCGGT----- mirL 19 2
---AGTCATGGTGTTCGGTCTTAGT----- mirL 22 2
-ACAGTCATGGTGTTCGGT----- mirL 19 1
-----CCAGGACCATCAGTGTGACTAT mirR 22 11
-----CCAGGACCATCAGTGTGAC--- mirR 19 1
```

>mmu-mir-682

```
GTCGGCATCTGGCACTGTGGTTCCCTGCATGAAAACAGTGGCCGGCGGGGCTGGACCTACAACACCACCTCTGCAGTCACAGTGAAGTCTGCCATCAG species len reads
GTCGGCATCTGGCACTGTGGTTCCCTGCATGA----- morL 31 1
-----TGGCACTGTGGTTCCCTGCATGA----- morL 22 1
-----TGAAAACAGTGGCCGGCGGGGCC----- mirL 23 2
-----TCACAGTGAAGTCTGCCA---- mirR 18 9
-----CAGTCACAGTGAAGTCTG----- mirR 18 1
-----TCACAGTGAAGTCTGCCATC-- mirR 20 1
-----TCACAGTGAAGTCTGCCAT--- mirR 19 1
-----TCACAGTGAAGTCTGCCATCAG mirR 22 1
```

>mmu-mir-466n

```
TGCGTGCACACACACACACACACACAC species len reads
-GCGTGCACACACACACACACACAC-- mirR 24 9
TGCGTGCACACACACACACACACAC---- mirR 23 2
```



```
TCCTAACAGCAGGAGTAGGAGC----- mirL 22 3
TCCTAACAGCAGGAGTAGGAG----- mirL 21 2
TCCTAACAGCAGGAGTAGGAGCTC----- mirL 24 1
TCCTAACAGCAGGAGTAG----- mirL 18 1
-----CCTTTAGGACCCTTTCCC--- mirR 18 4
-----CCTTTAGGACCCTTTCCC--- mirR 19 1
-----TTAGGACCCTTTCCCACA mirR 19 1
```

>mmu-mir-1899

```
AATCTTAGTCAGCGATGGCCGAATCTGCTTCCTCCTGGTTAGAATGAATGTGCTAAGTGGATTTAGATTCTGCTCATTCCGTTGATTACACATAAATCAAAGAATGGTGTATTATGCACCATCCCCTCTGAATTGACTAC
AATCTTAGTCAGCGATGGC-----TCCCCTCTGAATTGACT--
-----TCCCCTCTGAATTGACTAC
```

>mmu-mir-3070a

```
CTGGTGCTACCGTCAGGGGTAGATTCC species len reads
-TGGTGCTACCGTCAGGGGTAGAG---- mirR 22 5
--GGTGCTACCGTCAGGGGTAGATTCC mirR 25 3
-TGGTGCTACCGTCAGGGGT----- mirR 19 2
--GGTGCTACCGTCAGGGGTAG---- mirR 20 2
CTGGTGCTACCGTCAGGGG----- mirR 19 1
-TGGTGCTACCGTCAGGGGTAG---- mirR 21 1
CTGGTGCTACCGTCAGGGGTAG---- mirR 22 1
--GGTGCTACCGTCAGGGGTAGAG---- mirR 21 1
```

>mmu-mir-207

```
TGCGCACGCGCGGAGCAAGGCAGGGGTGAGGGGCTGCGGGAGGAGCCGGGCGGAGGCTGCGGCTTTCGCTTCTCCTCCCTCTCTTTGTTGAGGTTGACCTCCCCCCCCCTCCGCTTTTCG species
-----CGCGCGGAGCAAGGCAGG----- morL 18
TGCGCACGCGCGGAGCAAGG----- morL 20
-----AGGGGTGAGGGGCTGCGG----- mirL 18
-----GGGGTGAGGGGCTGCGGG----- mirL 18
-----GGTGAGGGGCTGCGGGAGGA----- mirL 20
-----AGGGGTGAGGGGCTGCGGG----- mirL 19
-----CCCCCCTCCGCTTTTC- mirR 18
-----CCCCCCTCCGCTTTTCG mirR 19
-----CCCCCCCCCTCCGCTTT--- mirR 19
-----CCCCCCCCCTCCGCTTT--- mirR 18
```

>mmu-mir-3080

```
AAGTCCACGTTTTGAGATCTGAAGCGCCTGTTCTTGGATCGTGGCCCTGTAGTCATCCTCGGGCAAAGCGCTTGACATCTCTGTGCCTCCTTTC species len reads
AAGTCCACGTTTTGAGATC----- morL 19 1
-----CTGAAGCGCCTGTTCTTG----- mirL 18 2
-----TGAAGCGCCTGTTCTTGGATCG----- mirL 22 2
-----GATCTGAAGCGCCTGTTCT----- mirL 19 1
-----TGAAGCGCCTGTTCTTGGATC----- mirL 21 1
-----TCCTCGGGCAAAGCGCTTGACA----- mirR 22 3
```

```
-----TCCTCGGGCAAAGCGCTTGA----- mirR 20 2
-----TCATCCTCGGGCAAAGCGCTTGAC----- mirR 24 1
-----CCTCGGGCAAAGCGCTTGACA----- mirR 21 1
-----ATCCTCGGGCAAAGCGCTTGACATCTCTGTGCC----- mirR 33 1
-----ATCTCTGTGCCTCCTTTC morR 18 1
```

>mmu-mir-762

```
TGGCCCGGCTCCGGGTCTCGGCCCGCACGGTCCGGCCGCATGCTGGCGGGGCTGGGGCCGGGACAGAGCCCGTGGCGGGGCGCCTGTGGTCCGGCGATCTCAGGCTGAGCGCCAGG species len reads
-----GGCTCCGGGTCTCGGCC----- morL 18 1
TGGCCCGGCTCCGGGTCTC----- morL 19 1
-----CCCGCACGGTCCGGCCGGC----- mirL 19 1
-----ATCTCAGGCTGAGCGCCA-- mirR 18 12
-----ATCTCAGGCTGAGCGCCAGG mirR 20 1
```

>mmu-mir-705

```
ACTCCATGTCCCAGTAGTGGTGGGAGGTGGGGTGGGCACAGAGGGAATGACTTCTTTCTCTGCAGTCTCCCTACCTCCCTAACATGAAACCCCTCAGGTTGGGGTTGGGGCTGCTCATGTTTT species len
ACTCCATGTCCCAGTAGTGGT----- morL 21 1
ACTCCATGTCCCAGTAGTGGT----- morL 22 1
---CCATGTCCCAGTAGTGGT----- morL 18 1
-----AGGTGGGGTGGGCACAGA----- mirL 18 2
-----GGGAGGTGGGGTGGGCAC----- mirL 18 1
-----TGGGGTGGGCACAGAGGG----- mirL 18 1
-----TGGGGTGGGCACAGAGGGA----- mirL 19 1
-----GGTGGGGTGGGCACAGAG----- mirL 18 1
-----CAGGTTGGGGTTTGGGGC----- mirR 18 4
-----TCCAGGTTGGGGTTTGGGGCTGCTCATGTTTT mirR 32 2
-----CAGGTTGGGGTTTGGGGCT----- mirR 19 1
```

>mmu-mir-688

```
CTGGGGGAGGGACGGGCGAAAGGGCAGTGAAGAAAAGTAGGGGCTTGCTTGGGGAGAGCACCTCGCAGGCGACTACTTATTCCAGCTCGCCCCCAGCAAGTCCGACA species len reads
CTGGGGGAGGGACGGGCG----- morL 18 2
---GGGGGAGGGACGGGCGAAAG----- morL 20 1
-----AGGGCAGTGAAGAAAAGT----- mirL 18 2
-----GAAAGGGCAGTGAAGAAAAG----- mirL 20 1
-----AGGCGACTACTTATTCCAGC----- mirR 20 7
-----CGCAGGCGACTACTTATTCC----- mirR 20 1
-----CTCGCCCCCAGCAAGTCC----- morR 19 1
-----GCCCCCAGCAAGTCCGACA morR 20 1
```

>mmu-mir-669i

```
AATAATGTGCATGTGTATAGTTGTGTGCATATTCATTTCTCTATATGACTATGCATATACACATGCATACAACTCACATACAGGAAT species len reads
--TAATGTGCATGTGTATAGT----- mirL 21 2
--TAATGTGCATGTGTATAGTT----- mirL 22 2
AATAATGTGCATGTGTATAG----- mirL 22 1
-----TGCATATACACATGCATAC----- mirR 21 4
-----GCATATACACATGCATAC----- mirR 20 1
```



```

-ACAAATGATGAACCTTTTGACGG----- mirL 23 1
CACAAATGATGAACCTTTTGACGGG----- mirL 25 1
-ACAAATGATGAACCTTTTGACG----- mirL 22 1
-----TTAGACTCCATCTTGATAC mirR 19 3
-----TAGACTCCATCTTGATAC mirR 18 2
-----TTAGACTCCATCTTGATA- mirR 18 1

>mmu-mir-599
TGTGCTGTCCACAGTGTATTTGATAAGATGACATAGGAGAGGAACTTCTTTACCTTTGTGTCAGTTTATCAAACCCATACCTGGATGACAAGCAATTCAATGGAAGGAAAACCAGT species len reads
TGTGCTGTCCACAGTGTATTTGATAAGATGACATAGGAGAGGAACTTCTTTACCTTTGTGTCAGTTTATCAAACCCATACCTGGATGACAAGCAATTCAATGGAAGGAAAACCAGT morL 18 2
-----GTATTTGATAAGATGACAT----- mirL 19 1
-----TTTGATAAGATGACATAG----- mirL 18 1
-----GTATTTGATAAGATGACA----- mirL 18 1
-----TACCTGGATGACAAGCAA----- mirR 18 8
-----CATACCTGGATGACAAGCA----- mirR 19 1
-----AATGGAAGGAAAACCAGT morR 18 1

>mmu-mir-1970
GCCTTATTGGAGTGGATGTGCATTGTTGGAGGAAATGTGTCACTGGGGATAGGCTTTGAGGTTTCAGAAGCTCAGTCAGGCCTAGTGGCACTCACTCTTCCTGT species len reads
GCCTTATTGGAGTGGATGTGCATTGTTGGAGGAAATGTGTCACTGGGGATAGGCTTTGAGGTTTCAGAAGCTCAGTCAGGCCTAGTGGCACTCACTCTTCCTGT morL 20 1
-----GTGCATTGTTGGAGGAAAT----- mirL 19 9
-----AAGCTCAGTCAGGCCTAG----- mirR 18 3
-----AGCTCAGTCAGGCCTAGTG----- mirR 19 1
-----TGGCACTCACTCTTCCTGT morR 19 1

>mmu-mir-295
ACTCAAATGTGGGGCACACTTCTGGACTGTACATAGAAAGTGCTACTACTTTTGTAGTCTCTCTGTGGGCA species len reads
ACTCAAATGTGGGGCACACTTCTGGACTGTACATAGAAAGTGCTACTACTTTTGTAGTCTCTCTGTGGGCA mirL 22 2
---CAAATGTGGGGCACACTTCTGGACTGTACATAGAAAGTGCTACTACTTTTGTAGTCTCTCTGTGGGCA mirL 19 1
-----TAGAAAGTGCTACTACTT----- mirR 18 11
-----GAGTCTCTCTGTGGGCA morR 18 1

>mmu-mir-653
GATTTTCATCTTTTCAGTGTGAAACAATCTCTACTGAACCAAGCTCCAAAGCGAGTTCAGTGGAGTTGTTTCAGTATTGC species len reads
GATTTTCATCTTTTCAGTGTGAAACAATCTCTACTGAACCAAGCTCCAAAGCGAGTTCAGTGGAGTTGTTTCAGTATTGC morL 18 1
-----TTGAAACAATCTCTACTGAACC----- mirL 22 3
-----TTGAAACAATCTCTACTGAAC----- mirL 21 3
-----TTGAAACAATCTCTACTG----- mirL 18 1
-----TTGAAACAATCTCTACTGAA----- mirL 20 1
-----TTGAAACAATCTCTACTGAACCA----- mirL 23 1
-----GAGTTTGTTCAGTATTGC----- mirR 18 3
-----GAGTTTGTTCAGTATTGC----- mirR 19 1

>mmu-mir-2861
CTGCAGCTCCGGCTCCCCCTGGCCTCCCGGGAAGTACAAGTCCAGGGGCTGGCGGGCGGAGACCGG species len reads
CTGCAGCTCCGGCTCCCCCTGGCCTCCCGGGAAGTACAAGTCCAGGGGCTGGCGGGCGGAGACCGG mirL 18 2

```

```
--GCAGCTCCGGCTCCCCCT----- mirL 18 1
-----GGCGGCGGGCGGAGACCG- mirR 18 9
-----GGCGGCGGGCGGAGACCGG mirR 19 1
-----TGCGGCGGGCGGAGACC-- mirR 18 1
```

>mmu-mir-1187

```
ACAATTTATTTTACACACACACACACATATATATATATATGTGTGTGTGTATGTGTGTAAATAACAATGTTAAAAT species len reads
ACAATTTATTTTACACAC----- mirL 19 3
-CAATTTATTTTACACAC----- mirL 18 2
ACAATTTATTTTACACA----- mirL 18 2
-----TATATGTGTGTGTGTATGTGT----- mirR 21 3
-----ATATATGTGTGTGTATGTG----- mirR 21 1
-----ATGTGTGTGTGTATGTGTGTAA----- mirR 22 1
-----TATATGTGTGTGTATGTG----- mirR 20 1
-----TAAATAACAATGTTAAAAT morR 19 1
```

>mmu-mir-669o

```
AGTTGTGTGTGCATGTTTATGTGTGTTTGAATATACATAACACACACACAGTATAAACACACAAGCACACACACAC species len reads
AGTTGTGTGTGCATGTTTAT----- mirL 20 3
AGTTGTGTGTGCATGTTTATGTGT----- mirL 25 1
AGTTGTGTGTGCATGTTTATGTGT----- mirL 24 1
AGTTGTGTGTGCATGTTT----- mirL 18 1
-----ATAAACACAAGCACACACAC-- mirR 20 4
-----TAAACACAAGCACACACAC-- mirR 19 2
-----TAAACACAAGCACACACACAC mirR 21 1
-----AAACACAAGCACACACACACAC mirR 20 1
```

>mmu-mir-878

```
TGCTTTATCTAGTTGGATGTCAAGACACGTGAAACTTAAGTGCATGACACCACACTGGGTAGAGGAGGGCTCACAGTGTT species len reads
--CTTTATCTAGTTGGATGT----- mirL 18 1
TGCTTTATCTAGTTGGAT----- mirL 18 1
----TATCTAGTTGGATGTCAAGAC----- mirL 21 1
-----TCAAGACACGTGAAACTTAA----- loop 20 1
-----GCATGACACCACACTGGGTAG----- mirR 21 5
-----CATGACACCACACTGGGTAG----- mirR 20 1
-----GCATGACACCACACTGGG----- mirR 18 1
-----AGTGCATGACACCACACTG----- mirR 19 1
-----GTGCATGACACCACACTGG----- mirR 19 1
-----AGGAGGGCTCACAGTGTT morR 18 1
```

>mmu-mir-692-2

```
CCTCCGCAGGGTGGCAGGGCCACAACCAGCGCAGACTGGCGCGCCCCAGGGATCTCTGGGCGAGTATCTCTTTGAGCGCCTCACTCTCAAGCACGACTAGGAGGCCTCTGT species len reads
CCTCCGCAGGGTGGCAGGGCCACAACCAGCG----- morL 31 1
-----CAGGGTGGCAGGGCCACAACCAGC----- morL 24 1
-----AGGGCCACAACCAGCGCAG----- morL 19 1
-----CAGACTGGCGCGCCCCAGGGATCT----- mirL 24 1
```

```
-----CGCAGACTGGCGCGCCCCAGGGATCTCTGG----- mirL 30 1
-----TCTCTGGGCGAGTATCTCT----- loop 19 2
-----TCTTTGAGCGCCTCACTC----- mirR 18 3
-----CTTTGAGCGCCTCACTCTC----- mirR 19 1
-----TCTTTGAGCGCCTCACTCTCA----- mirR 21 1
-----AAGCACGACTAGGAGGCCTCTGT morR 23 1
-----AGCACGACTAGGAGGCCT---- morR 18 1
```

>mmu-mir-1904

```
ACTGCAAGTTAGCTGTTCTGCTCCTCTGGAGGGAGGTTCTCTGTTTGACACCTCTTTCAGGTAGATTAACATTTTATTTGCAAACC species len reads
-CTGCAAGTTAGCTGTTCTG----- morL 19 1
ACTGCAAGTTAGCTGTTCT----- morL 19 1
-----TCCTCTGGAGGGAGGTTCTCTG----- mirL 22 1
-----ATTAAACATTTTATTTGC----- mirR 18 6
-----GATTAAACATTTTATTTGC----- mirR 19 2
-----GATTAAACATTTTATTTG----- mirR 18 1
-----AAACATTTTATTTGCAAACC mirR 21 1
```

>mmu-mir-669j

```
GATTCATGTGATGTCCACCAAGAATGTCATGTGTGTATAGTTGTGTACATATTCACTTTTGTATATGAATATGCATATACTCACATGCAAACATACTCCCACGAATGGCCCGAGCTATGACTCAGTTAG species 1
-ATTCATGTGATGTCCACCA----- morL 19 1
GATTCATGTGATGTCCAC----- morL 18 1
-ATTCATGTGATGTCCACC----- morL 18 1
--TTCATGTGATGTCCACCA----- morL 18 1
-----AGAATGTGCATGTGTGTA----- mirL 18 1
-----AGAATGTGCATGTGTGATA----- mirL 20 1
-----CATACTCCCACGAATGGC----- mirR 18 5
-----GCCCGAGCTATGACTCAGTT-- morR 20 1
-----GAGCTATGACTCAGTTAG morR 18 1
```

>mmu-mir-3100

```
GGGGTCTCTGTGCTTGGGAACGGGGTGTCTTTGGGAGTCTTGGGGGCTACCAAACCCCTGTGACACACCCGCTCCCAGTAC species len reads
GGGGTCTCTGTGCTTG----- morL 18 1
-----TTGGGAACGGGGTGTCTTT----- mirL 19 1
-----TTGGGAACGGGGTGTCTTTGG----- mirL 21 1
-----CTGTGACACACCCGCTCCC----- mirR 19 4
-----CTGTGACACACCCGCTCC----- mirR 18 2
-----CTGTGACACACCCGCTCCCAGTAC mirR 24 1
-----TGTGACACACCCGCTCCCAGT-- mirR 21 1
```

>mmu-mir-1893

```
TCCCCAGAGCGGAGAGGTATCTGCTGCGCCTGAGATGAGTAAACTGTCGTTTCGGGCGCGGGCGCTGGACGCCTCGAAGCCG species len reads
TCCCCAGAGCGGAGAGGT----- morL 18 3
TCCCCAGAGCGGAGAGGTA----- morL 19 1
```



```
TCCCCAGAGCGGAGAGGTAT----- morL 20 1
-----ATCTGCTGCGCCTGAGATG----- mirL 19 2
-----ATCTGCTGCGCCTGAGATGAG----- mirL 21 1
-----TCTGCTGCGCCTGAGATGAGTA----- mirL 22 1
-----ATCTGCTGCGCCTGAGATGA----- mirL 20 1
-----TCTGCTGCGCCTGAGATGAGTAA----- mirL 23 1
-----GCTGGACGCCTCGAAGCC- mirR 18 1
-----CTGGACGCCTCGAAGCCG mirR 18 1
```

>mmu-mir-675

```
CCAGGGACTGGTGCAGAAAGGGCCACAGTGGACTTGGTACTGTATGCCCTAACCGCTCAGTC species len reads
--AGGGACTGGTGCAGAAAGGG----- mirL 20 1
CCAGGGACTGGTGCAGAAA----- mirL 19 1
-----TGTATGCCCTAACCGCTCAGT- mirR 21 4
-----TGTATGCCCTAACCGCTCAGTC mirR 22 4
-----CTGTATGCCCTAACCGCTCAGT- mirR 22 1
-----CTGTATGCCCTAACCGCTCAG-- mirR 21 1
-----TGTATGCCCTAACCGCTCAG-- mirR 20 1
```

>mmu-mir-290

```
CTGGACCGCCTCATCTTGCGGTACTCAAACATATGGGGGCACTTTTTTTTTTCTTTAAAAAGTGCCGCCTAGTTTTAAGCCCCCGCGTTGAGAAAA species len reads
CTGGACCGCCTCATCTTGC----- morL 19 1
-----ACTCAAACATATGGGGGCACTTT----- mirL 22 2
-----ACTCAAACATATGGGGGCAC----- mirL 19 2
-----ACTCAAACATATGGGGGCACTTTT----- mirL 23 2
-----CCCCGCGGTTGAGAAAA mirR 18 3
-----GCCCGCGGTTGAGAAA- mirR 18 2
-----GCCCGCGGTTGAGAAAA mirR 19 1
```

>mmu-mir-374c

```
TGATAATACAACCTGCTAAGTGCTAGAACACTTAGCAGGTTGTATTATATCCACCCGAGTAGGATTTTC species len reads
TGATAATACAACCTGCTAAGTGC----- mirL 23 1
--TAATAACAACCTGCTAAGTGC----- mirL 20 1
--AATAACAACCTGCTAAGTGCT----- mirL 20 1
-----CTTAGCAGGTTGTATTATATCC----- mirR 22 4
-----CTTAGCAGGTTGTATTATA----- mirR 19 2
-----TAGCAGGTTGTATTATATCC----- mirR 20 1
-----TTAGCAGGTTGTATTATATCC----- mirR 21 1
-----TCCACCCGAGTAGGATTTTC morR 19 1
-----TCCACCCGAGTAGGATTT- morR 18 1
```

>mmu-mir-669b

```
ATGAATGTATGTGCATGTGTATATAGTTTTGTGTGCATGTGCATGTGTGTCTATTAATGTACATATACATACACAAACATAT species len reads
ATGAATGTATGTGCATGT----- mirL 18 4
ATGAATGTATGTGCATGTGTA----- mirL 21 1
-----ATATACATACACAAAC----- mirR 18 3
```

```
-----ATATACATACACACAAACA--- mirR 19 1
-----ATATACATACACACAAACATAT mirR 22 1
-----TACATATACATACACACAAACA--- mirR 22 1
-----ACATATACATACACACAAAC--- mirR 20 1
-----TACATACACACAAACATA- mirR 18 1
```

>mmu-mir-718

```
GCCCCCGTGTGGCGGAAGGCCGCGGAGGGCAAGATGGCGGGTTCGAGCGCCGCTCTTCCGCCCGCCGGGTGTCGCACGAGGCCGGCCTGAAG species len reads
GCCCCCGTGTGGCGGAAGGCC----- mirL 21 2
---CCCGTGTGGCGGAAGGCC----- mirL 19 1
-CCCCCGTGTGGCGGAAGGCC----- mirL 20 1
-----CTTCGCCCGCCGGGTGTCG----- mirR 21 5
-----CTTCGCCCGCCGGGTGTC----- mirR 20 2
-----CTTCGCCCGCCGGGTGTC----- mirR 19 1
-----CACGAGGCCGGCCTGAAG morR 18 1
```

>mmu-mir-1932

```
TTCAGTGCAGGCAGCCGGTCCAGCCTGGCCCTGAGTCTCCGACCCCATTAAGTCTCGGGTTGCGGACAGCGCTAGGTTCGGCCCTGCTCCCAGCAACACCCAGGAAGGTCGGGGACCCCAACCTACAC species le
TTCAGTGCAGGCAGCCGGT----- morL 19 2
-TCACTGCAGGCAGCCGGT----- morL 19 1
--CACTGCAGGCAGCCGGTCCA----- morL 20 1
-----CAGCCTGGCCCTGAGTCT----- mirL 18 1
-----GGTCGGGGACCCCAACC----- mirR 18 3
-----AAGGTCGGGGACCCCAAC----- mirR 19 1
-----TCGGGGACCCCAACCTA--- mirR 18 1
-----TCGGGGACCCCAACCTACAC mirR 21 1
-----CGGGGACCCCAACCTAC-- mirR 18 1
-----CGGGGACCCCAACCTACA- mirR 19 1
```

>mmu-mir-692-1

```
GGGCAACCATCTGACCAACCTCCGCAGGGTGGCAGGGCCACAACCAGCGCAGACTGGCGCGCCCGAGGATCTCTGGGTGAGTATCTCTTTGAGCGCCTCACTCTCAAGCACAACCTAGGAGGCCTC species len
-----CCAACCTCCGCAGGGTGGC----- morL 19 1
GGGCAACCATCTGACCAACCTCCGCAGGGT----- morL 31 1
-----TGACCAACCTCCGCAGGGT----- morL 19 1
-----AGGGCCACAACCAGCGCAG----- mirL 19 1
-----AGGGCCACAACCAGCGCAGAC----- mirL 21 1
-----TCTTTGAGCGCCTCACTC----- mirR 18 3
-----CTTTGAGCGCCTCACTCTC----- mirR 19 1
-----TCTTTGAGCGCCTCACTCTCA----- mirR 21 1
-----CAAGCACAACCTAGGAGGCC-- morR 19 1
-----AAGCACAACCTAGGAGGCCTC morR 20 1
```

>mmu-mir-742

```
CTCTACTCACATGGTTGCTAATCACGTGAAGTGTAGGTGAAAGCCACCATGCTGGGTAAAGTAAAGCTCATCATGTTCTTCATTG species len reads
CTCTACTCACATGGTTGC----- mirL 18 1
-----CATCATGTTCTTCATTG mirR 18 11
```

```
>mmu-mir-669k
ATTCATCTTATGCCACCAAAAATGTGCATGTGTGTATAGTTGTGTGCATATTCACCTTCTCTATATGAATATGCATATACACGCATGCAAACACATTCATAGGAA species len reads
ATTCATCTTATGCCACCA-----
-----AAAATGTGCATGTGTGTA-----
-----ATATGCATATACACGCATGC-----
-----ATATGCATATACACGCAT-----
-----AATATGCATATACACGCAT-----
-----AATATGCATATACACGCATGCA-----
-----AATATGCATATACACGCATGC-----
-----CAAACACATTCATAGGAA morR 18 1
```

```
>mmu-mir-3110
GGACTGTGGGGCTGTGTTCTGCCTCCCCTGAAGGCTCTGTTGTCACTCTGGGCACTCCATCGGAGGCAGACACTCAACCCACACTTTGCCATCT species len reads
GGACTGTGGGGCTGTGTT-----
-----TTCTGCCTCCCCTGAAGGCTC-----
-----TCTGCCTCCCCTGAAGGCTCTG-----
-----TTCTGCCTCCCCTGAAGGCT-----
-----TTCTGCCTCCCCTGAAGGCTCTGTT-----
-----TTCTGCCTCCCCTGAAGGCTCTGTT-----
-----TCTGCCTCCCCTGAAGGCTC-----
-----TCTGCCTCCCCTGAAGGCTCTGT-----
-----CCCCACACTTTGCCATCT mirR 18 2
```

```
>mmu-mir-469
CCTCTTTCATTGATCTTGGTGTCTCAAATTGAAAGCCAAGGAAGAGGTGGGGGGCGTGGTAGCCTTTTGCCTCTG species len reads
CCTCTTTCATTGATCTTG-----
-----GGTAGCCTTTTGCCTCTG mirR 18 10
-----CGTGGTAGCCTTTTGCCTC-- mirR 19 1
```

```
>mmu-mir-3096
AAGGATGAGAACTCTAACCTGACAGGATACGCTGCTGTGATGGGTTAAAGGATTT species len reads
AAGGATGAGAACTCTAAC-----
-----CTGTGATGGGTTAAAGGATTT mirR 21 6
-----CTGTGATGGGTTAAAGGAT-- mirR 19 2
-----TGTGATGGGTTAAAGGATT- mirR 19 1
-----CTGTGATGGGTTAAAGGA-- mirR 18 1
-----TGCTGTGATGGGTTAAAGG--- mirR 19 1
```

```
>mmu-mir-449b
CGAACTTGCCAGACTCGGGTAGGCAGTGTGTTAGCTGGCTGCGTTGGGTCAGGCCAGCAGCCACAGCTACCCTGCCACTTC species len reads
---ACTTGCCAGACTCGGGTA-----
CGAACTTGCCAGACTCGGGT-----
-----AGGCAGTGTGTTAGCTGGC-----
-----TAGGCAGTGTGTTAGCTGGCT-----
-----AGCCACAGCTACCCTGCCACT-- mirR 21 2
```

```
-----GCCACAGCTACCCTGCCAC--- mirR 19 1
-----GCCACAGCTACCCTGCCA--- mirR 18 1
-----GCAGCCACAGCTACCCTGC----- mirR 19 1
-----AGCCACAGCTACCCTGCCACTTC mirR 23 1
```

>mmu-mir-208a

```
GAGCTATCATCATGCAGCCTGGGCCTGAGGGAAGCGGGTGGG species len reads
--GCTATCATCATGCAGCCTGG----- mirR 20 3
--GCTATCATCATGCAGCCT----- mirR 18 2
-AGCTATCATCATGCAGCC----- mirR 18 2
----ATCATCATGCAGCCTGGGC----- mirR 19 1
-AGCTATCATCATGCAGCCT----- mirR 19 1
GAGCTATCATCATGCAGC----- mirR 18 1
-----CTGAGGGAAGCGGGTGGG morR 18 1
```

>mmu-mir-1937b-2

```
ATCCCGGACGAGCCCCAAATGAAAGATCCCCAAAGGGAGACCCTCACTCAAGCCTCGGGATGTGGCGCGGACCCAAGAGAGACGCGGAGACCGAAATGGCGTGCACACAAAGCTATTTAATAAAGCGGGGGTGGGGGGG
ATCCCGGACGAGCCCCAAATGA-----
-----GCGGGGGTGGGGGGG
-----CGGGGGTGGGGGGG
-----GCGGGGGTGGGGGGG
-----AGCGGGGGTGGGGGGG
-----GGGGGTGGGGGGG
```

>mmu-mir-3472

```
TTCTTCTGTTGAGGGACATTTGGGTCTTTCCAGCTTCTGGCTATTATAAATAAGGCTGCTCCTTATTTATAATAGCCAGAAGCTGGAAGGAACCCAGATGCCCTCAACAGAGGAATGGATACAGAAAATGTGGTAC sp
TTCTTCTGTTGAGGGACATTT----- mo
----TCTGTTGAGGGACATTTG----- mo
-----GTTGAGGGACATTTGGGTTC----- mo
-----GGGTCTTTCCAGCTTCT----- mi
-----TTCTTTCCAGCTTCTGGCT----- mi
-----GGGTCTTTCCAGCTTCTGGC----- mi
-----TTCTTTCCAGCTTCTGGCTATTA----- mi
-----ATGGATACAGAAAATGTGGTAC mi
```

>mmu-mir-3089

```
AGCTGGTGGCTTGCAACTGAGTTCAGGGACAGCGTGTCTCAGTTTCTGTCTGAGCATCTGCTGATCCTGAGCTGT species len reads
AGCTGGTGGCTTGCAACT----- morL 18 1
-----AGTTCAGGGACAGCGTGT----- mirL 19 1
-----AGCATCTGCTGATCCTGAGC--- mirR 20 6
-----AGCATCTGCTGATCCTGAGCTGT mirR 23 2
-----AGCATCTGCTGATCCTGA----- mirR 18 1
```

>mmu-mir-681

```
TGTCCTCATCACTCTCCCCTAAGCAGGTAGATGGGTTTTCAGTTCACTCGCAGTCCAGGGCCTCCAGC species len reads
TGTCCTCATCACTCTCCC----- mirL 18 7
```

-----CGCAGTCCAGGGCCTCCA-- mirR 18 3  
-----CAGTCCAGGGCCTCCAGC mirR 18 1

>mmu-mir-465a

ATGGCACTGATGTGATAAAAATAAAAAATTGATCAGGGCCTTTCTAAGTAGAGTAAGGCTTACCACCTTCTACGTTTAACTGACTTGTAGATGGATATTCAGATTAGCTGTAGG species len reads  
ATGGCACTGATGTGATAA----- mirL 18 2  
-----ATGGATATTCAGATTAGC----- mirR 18 5  
-----TAGATGGATATTCAGATTA----- mirR 19 2  
-----GATATTCAGATTAGCTGTAGG mirR 21 1  
-----GGATATTCAGATTAGCTGT--- mirR 19 1

>mmu-mir-467b

ACATACACACACCAACACACACAT species len reads  
---TACACACACCAACACACAC-- mirR 19 5  
---TACACACACCAACACACA--- mirR 18 4  
ACATACACACACCAACACAC---- mirR 20 1  
---TACACACACCAACACACACAT mirR 21 1

>mmu-mir-1929

TAGGACTTTATAGAGCAGAGGTTTGCAGCCTGTGACACTCAGCTCATGGAGACCTAGGTGGCCTTGGGTTCTGAGCACCAGACAGGACTTGAATATGTCTCAGTCATCCGTCAG species len reads  
TAGGACTTTATAGAGCAGA----- mirL 19 1  
-----AGCACCAGACAGGACTTGG----- mirR 19 9  
-----TATGTCTCAGTCATCCGTCAG morR 21 1

>mmu-mir-717

TGTCCGCTATCACTGTACCGTCATTTTTCAGTCTCAGACAGAGATACCTTCTCTGAATTCATAGAAGCTGCTCTCCGTTCCGAAGGGATTGAGAAGTGATAAATCCAGCAACTATCTCAGTACCTCATTAGTGTCTGCAGG  
TGTCCGCTATCACTGTAC-----  
TGTCCGCTATCACTGTACC-----  
TGTCCGCTATCACTGTACCGTC-----  
-----AGG

>mmu-mir-294

GAGGCCCTATCTAAGCTTTTAAAGTGAAAGTGCTTCCCTTTTGTGTGT species len reads  
GAGGCCCTATCTAAGCTTT----- mirL 19 1  
-----AAAGTGCTTCCCTTTTGTGTGT mirR 22 8  
-----AAAGTGCTTCCCTTTTGTGTG- mirR 21 1  
-----AAAGTGCTTCCCTTTTGTGT-- mirR 20 1

>mmu-mir-1951

AAACCACCTCTCTCACTTACTTCTGAAAGTTAAAAGGTAGTGGAGACTGGTGTGGCTAAACCTCTTGCCCTCCCCATCAGTGGCT species len reads  
---CCACCTCTCTCACTTAC----- mirL 18 4  
-AACCACCTCTCTCACTTACT----- mirL 21 2  
AAACCACCTCTCTCACTTACTTC----- mirL 24 1  
--ACCACCTCTCTCACTTACT----- mirL 20 1  
-----CCTCTCTCACTTACTTC----- mirL 18 1  
-----TTGCCTCCCCATCAGTGGCT mirR 20 2

>mmu-mir-293

```
GTCCTGTGGAAATGCTTCAATCTGTGGTACTCAAACGTGTGACATTTTGTTCCTTTGTAAGAAGTGCCGCAGAGTTTGTAGTGTGCCGATTGAGAAACTGCA species len reads
GTCCTGTGGAAATGCTT-----morL 18 1
-----TCTGTGGTACTCAAACGTGT-----mirL 21 4
-----TCTGTGGTACTCAAACGTGT-----mirL 22 1
-----AGTGCCGCAGAGTTTGTAGTGT-----mirR 22 2
-----GAAGTGCCGCAGAGTTT-----mirR 18 1
-----GCCGATTGAGAAACTGCA morR 18 1
```

>mmu-mir-1949

```
CATTCTGGGCCTGGTTCATGCCACCTCTGTTGTTAACTATAACCAGGATGTCAGCATAGTTGCTTACCCAGGAAGAGAAGCG species len reads
CATTCTGGGCCTGGTTCATGC-----mirL 21 1
-----GCCACCTCTGTTGTTAACT-----loop 19 1
-----TATACCAGGATGTCAGCATAGTT-----mirR 23 4
-----TATACCAGGATGTCAGCATAGT-----mirR 22 1
-----AACTATAACCAGGATGTCAGC-----mirR 20 1
-----ATACCAGGATGTCAGCAT-----mirR 18 1
-----TACCCAGGAAGAGAAGCG morR 18 1
```

>mmu-mir-3067

```
AGCTTCCCAGTTCTCAGGCCCGCTGTGGTGTGAAGTTAGGTTACCAAGCGGCTGCCCTGGGAGAGGGGGAGGTGTGCCTCCTCTTCCCC species len reads
AGCTTCCCAGTTCTCAG-----mirL 18 4
-----CTGCCCTGGGAGAGGGGG-----mirR 18 3
-----TGCCCTGGGAGAGGGGGA-----mirR 18 1
-----GTGTGCCTCCTCTTCCCC-----morR 18 1
-----TGTGCCTCCTCTTCCCC morR 18 1
```

>mmu-mir-686

```
CACAGCAGGTGCTTATATTGCTTCCCAGACGGTGAAGAAAGTAATAGAGATCAACCCGTACCTTCTGGGCACCATGGCTGGGGGTGCAGCGGATTGCAGCTTCTGGGAGCGGTTGTTGGCTCGGCAGTGTCTGAATCTATGA
CACAGCAGGTGCTTATAT-----TTCCCAGACGGTGAAGAAAGTA-----GCAGCTTCTGGGAGCGGTTGTTGGC-----
-----GCAGCTTCTGGGAGCGGT-----GCAGCTTCTGGGAGCGGT-----
-----CAGCTTCTGGGAGCGGTTGTTGGCTCGGCAGTGT-----TGCAGCTTCTGGGAGCGGTTGT-----
-----GCTCGGCAGTGTCTGAAT-----GCTCGGCAGTGTCTGAAT-----
-----GGCAGTGTCTGAATCTATGA-----GCAGTGTCTGAATCTATGA
```

>mmu-mir-669n

```
CCACTCTGCAGATCTTTACATTTGTGTGTGGATGTGTGTGTAATGTATGTGCATCCCACAGCACATGTGCAGAGGGCATTGG species len reads
CCACTCTGCAGATCTTTA-----morL 18 1
-----ATTTGTGTGTGGATGTGTGTGTA-----mirL 23 1
-----ATTTGTGTGTGGATGTGTG-----mirL 19 1
-----ACATTTGTGTGTGGATGTGTG-----mirL 21 1
```

```
-----TTGTGTGTGGATGTGTGTG----- mirL 19 1
-----ACATTTGTGTGTGGATGTGTGT----- mirL 22 1
-----ATTTGTGTGTGGATGTGTGT----- mirL 20 1
-----ATGTGCATCCCACAGCAC----- mirR 18 1
-----TATGTGCATCCCACAGCAC----- mirR 19 1
-----ACATGTGCAGAGGGCATTGG----- morR 20 1
```

>mmu-mir-3065

```
AGGAGGCTGGCAGCTGCCCTCTTCAACAAAATCACTGATGCTGGAGTCACTGTGCACCCACTCAGCACCAGGATATTTGTTGGGGAGGACGGCCTGTGCAGCGTTGGAGCTGGTGGGCCGCTTGTCCG species len
AGGAGGCTGGCAGCTGCC----- morL 19 1
-----TCAACAAAATCACTGATGCTGG----- mirL 22 3
-----CAACAAAATCACTGATGCT----- mirL 19 1
-----TCAACAAAATCACTGATGCT----- mirL 20 1
-----TCAACAAAATCACTGATGCT----- mirL 23 1
-----GGAGGACGGCCTGTGCAGCGT----- mirR 21 1
-----TGGAGCTGGTGGGCCGCT----- morR 18 1
-----AGCTGGTGGGCCGCTTGTCCG----- morR 21 1
```

>mmu-mir-1971

```
GTAAGGCTGGGCTGAGAGGACATCTTTGTTCCATGGACCCAGTAGATAGGCAGCTTCTGCTTCCAGGAACAACCTGTCTGTTTTTCAGTCTATCTACTTCTTAAATTTCAATTTGC species len reads
GTAAGGCTGGGCTGAGA----- mirL 18 2
---AAGGCTGGGCTGAGAGGA----- mirL 18 1
GTAAGGCTGGGCTGAGAGGA----- mirL 21 1
-----CTTCTTAAATTTCAATT--- mirR 18 5
-----CCTAAATTTCAATTTGC----- mirR 18 1
```

>mmu-mir-3066

```
AGTGTGGTATGTTTTGGTTGCTGTAGATTAAGTAGTTAATATGATGCTGCACTTAATAGACCGCAACCTGCACTGGCCATGCTCTGGGCT species len reads
---GTGGTATGTTTTGGTTGC----- mirL 18 3
--TGTGGTATGTTTTGGTTGC----- mirL 19 2
AGTGTGGTATGTTTTGGT----- mirL 18 1
-----CACTTAATAGACCGCAACCTGC----- mirR 22 2
-----TTAATAGACCGCAACCTGCAC----- mirR 21 1
-----CTGGCCATGCTCTGGGCT----- morR 18 1
```

>mmu-mir-1963

```
TGGGACGAGATCATGAGGCCTTCTGGCCACTGGGAAGGACTCGGCCCTGTCCCGCAGGTGATGGGTGTCTTTAGTGACGAGGATGTGAAGCAGATCCTGAAGA species len reads
TGGGACGAGATCATGAGG----- mirL 18 2
TGGGACGAGATCATGAGGCC----- mirL 20 1
-----TGTGAAGCAGATCCTGAAG----- mirR 19 4
-----TGTGAAGCAGATCCTGAA----- mirR 18 2
-----TGTGAAGCAGATCCTGAAGA----- mirR 20 1
```

>mmu-mir-704

```
AGACATGTGCTCTGCTCCTAGGG species len reads
AGACATGTGCTCTGCTCCTAGG- mirR 22 4
```

AGACATGTGCTCTGCTCCTA--- mirR 20 2  
AGACATGTGCTCTGCTCCTAGGG mirR 23 2  
-GACATGTGCTCTGCTCCTAGG- mirR 21 1

>mmu-mir-3474

```
GAACCTTCCTGACTGGGCCGGAGCCCTGGGAGGAGACGTGGATTCTTTAGAGTGCATCTGCGTCTTGTTCCAGGTTCAGCTCGC species len reads
GAACCTTCCTGACTGGGCCGG----- morL 21 1
-----TTCCTGACTGGGCCGGGA----- morL 18 1
-----CCCTGGGAGGAGACGTGGATTCT----- mirL 23 2
-----CCCTGGGAGGAGACGTGGATT----- mirL 21 1
-----CCCTGGGAGGAGACGTGG----- mirL 18 1
-----GAGCCCTGGGAGGAGACGT----- mirL 19 1
-----AGTGCATCTGCGTCTTGT----- mirR 18 1
-----TGTTCCAGGTTCAGCTCGC morR 19 1
```

>mmu-mir-546

```
ATCTATCATGGTGGCAGGAGTCAGCTAGATGTTGTCTCTTGCTATCCCTGTGCTAGTTCCATGTTTTTA species len reads
ATCTATCATGGTGGCAGG----- mirL 18 3
-----CTCTTGCTATCCCTGTGC----- mirR 18 2
-----TCTTGCTATCCCTGTGCTAGT----- mirR 21 1
-----TCTTGCTATCCCTGTGCTAG----- mirR 20 1
-----TGTCTCTTGCTATCCCTG----- mirR 18 1
-----TGCTAGTTCCATGTTTTTA morR 18 1
```

>mmu-mir-302d

```
CTGCTTAAGGGCCCTCCTTTACTTTAACATGGAGGCACCTTGCTGTGCATTTAAAAATAAGTGCTTCCATGTTTGAGTGT species len reads
CTGCTTAAGGGCCCTCCT----- morL 18 1
-----ACTTTAACATGGAGGCAC----- mirL 18 2
-----TAAGTGCTTCCATGTTTGAGTGT mirR 23 4
-----TAAGTGCTTCCATGTTTGAGT-- mirR 21 2
```

>mmu-mir-3079

```
CTTTGATCTGATGAGCTAAGCTGGAGTTCCCATTCACCTGGCTCCAGGCTCATCAGATGAAAGTCCTTAGCTTAGGTGTGGCCTTTGTTGGAGTAGGTGTGGTGGCCTTGTT species len reads
-TTTGATCTGATGAGCTAAGCT----- mirL 21 1
-TTTGATCTGATGAGCTAAGCTG----- mirL 22 1
---TGATCTGATGAGCTAAGCTG----- mirL 20 1
CTTTGATCTGATGAGCTAAG----- mirL 20 1
-----TAGGTGTGGCCTTTGTTG----- mirR 18 3
-----TAGGTGTGGCCTTTGTTGGA----- mirR 20 1
-----TAGGTGTGGTGTGGCCTTGTT morR 21 1
```

>mmu-mir-291a

```
CATCAAAGTGGAGGCCCTCTCTTGAGCCTGAATGAGAAAGTGCTTCCACTTTGTGTGCCACTGCATGGGGAAAACATCATAGCTTTGCATCTGACGCATCGG species len reads
CATCAAAGTGGAGGCCCTCTCT----- mirL 22 2
--TCAAAGTGGAGGCCCTCTCTT----- mirL 21 2
-----AGCTTTGCATCTGACGCAT--- mirR 19 2
```



```
-----GCTTTGCATCTGACGCATCG- mirR 20 1
-----GCTTTGCATCTGACGCATCGG mirR 21 1
-----AGCTTTGCATCTGACGCATCG- mirR 21 1
```

>mmu-mir-1897

```
GAGAAAGAGGGGGGAAGTGCAGACTCCTTCAACTCGTTCTGTCCGGTGAGGAGTGATCCAGCTTGGGCTGACGAGAGGCTCCGGAGC species len reads
--GAAAGAGGGGGGAAGTGC-- mirL 19 1
GAGAAAGAGGGGGGAAGT----- mirL 18 1
-----AGGAGTGATCCAGCTTGG----- mirR 18 4
-----AGTGATCCAGCTTGGGCT----- mirR 18 1
-----CTGACGAGAGGCTCCGGAGC morR 20 1
-----TGACGAGAGGCTCCGGAG- morR 18 1
```

>mmu-mir-3109

```
AAATGGATGCGATGGTTCCCATGCTGTTCTGAGGCAGAGCTAGGGCCATCTC species len reads
--AATGGATGCGATGGTTCCC----- mirL 19 1
--AATGGATGCGATGGTTCCCATGCT-- mirL 24 1
--AATGGATGCGATGGTTCCCATGC----- mirL 23 1
AAATGGATGCGATGGTTC----- mirL 18 1
-----AGGCAGAGCTAGGGCCATC-- mirR 19 2
-----AGGCAGAGCTAGGGCCATCTC mirR 21 1
-----GGCAGAGCTAGGGCCATC-- mirR 18 1
```

>mmu-mir-327

```
TGATGCCCTTATAACTTGAGGGGCATGAGGATAGTCAGTAGTCCAACATCCCTCTTGATGGCACATTGCACATAGTTGCAATGGCTTATGAGGTC species len reads
TGATGCCCTTATAACTTG----- morL 18 1
-----AGGGGCATGAGGATAGTCA----- mirL 19 1
-----TCAGTAGTCCAACATCCCTCT----- loop 21 3
-----ATGGCACATTGCACATAGTT----- mirR 20 1
-----ATGGCACATTGCACATAG----- mirR 18 1
-----TGCAATGGCTTATGAGGTC morR 19 1
```

>mmu-mir-452

```
TATATATGCTAAGCAGTTACAACCTGTTTGCAGAGGAACTGAGACTTTATAACTATGTCTCAGTCTCATCTGCAAAGAGGTAAGTGCTTTGCCAAGCC species len reads
TATATATGCTAAGCAGTTA----- morL 19 1
-----AACTGTTTGCAGAGGAACTGA----- mirL 22 2
-----ACTGTTTGCAGAGGAAAC----- mirL 18 2
-----AACTGTTTGCAGAGGAACT----- mirL 20 1
-----GTAAGTGCTTTGCCAAGCC mirR 19 2
```

>mmu-mir-3071

```
TAGAACCCTCTGAAGACTCATTGAGACGATGATGGAGCTTAAAGATCCATCATCAAACAAAATGGA species len reads
TAGAACCCTCTGAAGACTC----- morL 19 1
--AGAACCCTCTGAAGACTC----- morL 18 1
-----TGAGACGATGATGGAGCTT----- mirL 19 1
-----TTGAGACGATGATGGAGC----- mirL 18 1
```

-----TGAGACGATGATGGAGCT----- mirL 18 1  
-----CATCATCAAACAAATGGA----- mirR 19 3

>mmu-mir-3063

TGGCTGGAGATCAGGTTTGACACTGTCTTGAGAACAATGTTCCAGTGAGGAATCCTGATCTCTCGCCCCAATTG species len reads  
TGGCTGGAGATCAGGTTT----- morL 18 1  
-----TTTGACACTGTCTTGAGAAC----- mirL 21 4  
-----TCCAGTGAGGAATCCTGA----- mirR 18 1  
-----TCCAGTGAGGAATCCTGATCTC----- mirR 22 1  
-----ATCTCTCGCCCCAATTG----- morR 18 1

>mmu-mir-3073

AGCTGTTCCCTGCCAGTGGTCACAGTTGGCGCCAGCCCTAGAGTCTAGATGGGTTGATGTCCACTGTGACCATAGTGCAGGCCAGCAGGAGGCC species len reads  
AGCTGTTCCCTGCCAGTGGT----- morL 20 1  
-----TCACAGTTGGCGCCAGCC----- mirL 18 1  
-----GGTCACAGTTGGCGCCAGCC----- mirL 20 1  
-----GATGTCCACTGTGACCAT----- mirR 18 2  
-----TTGATGTCCACTGTGACCATAG----- mirR 22 1  
-----TGATGTCCACTGTGACCATAGT----- mirR 22 1  
-----GCAGGCCAGCAGGAGGCC----- morR 18 1

>mmu-mir-1900

TAGAAGAGGGCGGAGCCTGGAGGGGACACCCGGGCGCCCTCTCTGGTCCTTCAATTCCGCCCCCGCCTTATCC species len reads  
TAGAAGAGGGCGGAGCCT----- mirL 18 1  
-----GGGGACACCCGGGCGCC----- loop 18 1  
-----CTGGAGGGGACACCCGGG----- loop 18 1  
-----GCCCTCTCTGGTCCTTCA----- mirR 18 2  
-----CCGCCCTCTCTGGTCCTT----- mirR 19 1  
-----GCCGCCCTCTCTGGTCCT----- mirR 18 1  
-----ATTCCGCCCCCGCCTTATCC----- morR 20 1

>mmu-mir-3075

TTGTACTGTCTGGGAGCAGCCAAGGACAAGTTACCTCTTGTCTTCTATCCTTGGCCTTCTAGGTGTCCAAGCTCACAGTAGGCTGGGAGCCAGAGCAGAGGACACAAGCAGGACTGA species len reads  
TTGTACTGTCTGGGAGCAGC----- mirL 20 1  
-----GGCTGGGAGCCAGAGCAG----- mirR 18 3  
-----GGCTGGGAGCCAGAGCAG----- mirR 20 1  
-----CAGAGGACACAAGCAGGA----- morR 18 2  
-----GGACACAAGCAGGACTGA----- morR 18 1

>mmu-mir-1938

GCCTGGGGCGCGGTGGGACTGTAGTTCGGTCTTCGCTTCGGACGCCAAGTCTGCATAGCGGTGGTACGGCTGAACTGCAGTTCCCATCATGC species len reads  
---TGGGGCGCGGTGGGACTTG----- mirL 19 1  
GCCTGGGGCGCGGTGGGA----- mirL 18 1  
-----CGCGTGGTACGGCTGAAC----- mirR 18 4  
-----CGCGTGGTACGGCTGAACTG----- mirR 20 1  
-----CTGCAGTTCCCATCATGC----- morR 18 1

>mmu-mir-1896

```
TCATTACAGTGATGTCTTTTGAACGACCATGGACTCTCTGATGGTGGGTGAGGAGGAGGGCCCGACTAAAGGTTTTCCACA species len reads
---TTACAGTGATGTCTTTTG----- mirL 18 1
TCATTACAGTGATGTCTTTTG----- mirL 21 1
-----ACTAAAGGTTTTCCACA mirR 18 6
```

>mmu-mir-669a-12

```
AAGCACACATACACAGATACAGGA species len reads
---CACACATACACAGATACAGGA mirR 21 2
AAGCACACATACACAGAT----- mirR 18 2
---ACACATACACAGATACAGGA mirR 20 2
-AGCACACATACACAGATAC---- mirR 19 1
AAGCACACATACACAGATAC---- mirR 20 1
```

>mmu-mir-509

```
TGTGTGTGGTTCTTTACTCCAGAATGTGGCAATCATGCATAATTAATGTGATTGACATTTCTGTAATGGAGTAACACATGTGA species len reads
TGTGTGTGGTTCTTTACTC----- morL 19 1
-----AGAATGTGGCAATCATGC----- mirL 18 2
-----CAGAATGTGGCAATCATGCAT----- mirL 21 1
-----AGAATGTGGCAATCATGCATA----- mirL 21 1
-----ATGTGATTGACATTTCTG----- mirR 18 2
-----TAATGGAGTAACACATGTGA morR 20 1
```

>mmu-mir-1956

```
TAACGACTCCTGACCTTCAGTCCAGGGCTGAGTCAGCGGAGCCCGAGTGGCTTCCTGGCTGGCACCTGGACGTAGGCTA species len reads
---GACTCCTGACCTTCAGTC----- morL 18 2
TAACGACTCCTGACCTTCAGT----- morL 21 1
TAACGACTCCTGACCTTCAGTC----- morL 22 1
-----TCCAGGGCTGAGTCAGCGG----- mirL 19 2
-----GGCACCTGGACGTAGGCTA mirR 19 1
```

>mmu-mir-466o

```
CTCATCAATCTATGTGACTGAGAG species len reads
---ATCAATCTATGTGACTGAG-- mirR 19 4
CTCATCAATCTATGTGAC----- mirR 18 2
---ATCAATCTATGTGACTGAGAG mirR 21 1
```

>mmu-mir-302b

```
GTGGGTTCCCTTCAACTTTAACATGGGAATGCTTTCTGTCTCATCGAAGAGTAAGTGCTTCCATGTTTTAG species len reads
GTGGGTTCCCTTCAACTT----- morL 18 1
-TGGGTTCCCTTCAACTTT----- morL 18 1
-----TTAACATGGGAATGCTTTC----- mirL 19 1
-----CTGTCTCATCGAAGAGTA----- loop 18 1
-----TAAGTGCTTCCATGTTTTA----- mirR 19 1
-----GTAAGTGCTTCCATGTTTTA----- mirR 20 1
```

```
-----AGTGCTTCCATGTTTTAG mirR 18 1

>mmu-mir-1958
TCTTAGTGATGAGCCTAGAGAAGAACTTACTGCTTCCACTTTCCTATAGTTAATTTCTAACTGCATTCTATAGGAAAGTGGAAAGCAGTAAGTTCTCTTCTAGGTTCCGTGACCTCACCAGCTGTGGATAGCTGGCT spe
TCTTAGTGATGAGCCTAG-----mor
-----AGAAGAGAACTTACTGCTTCC-----mir
-----AGCTGTGGATAGCTGGCT mir
-----ACCAGCTGTGGATAGCTG--- mir
-----CAGCTGTGGATAGCTGGC-- mir

>mmu-mir-710
AGAGTTGAGCTTGGTGTGAAAAGTACATACCCCTTCAACTCTTAGAACTTA species len reads
AGAGTTGAGCTTGGTGTGAA----- mirL 20 3
-GAGTTGAGCTTGGTGTGAA----- mirL 19 1
AGAGTTGAGCTTGGTGTGA----- mirL 19 1
-----CTTCAACTCTTAGAACTT- mirR 19 1
-----TTCAACTCTTAGAACTTA mirR 19 1

>mmu-mir-1937a
TGGGGTTCTGGGTGCTCCCAAATCCCGGACGAGCCCCCAAATGTAGGACCCCCCAATATGGCGACTCCCACTCTAATCCAGGATAGGGTGCACCCACGAACACGCAAGAA species len reads
TGGGGTTCTGGGTGCTCC----- mirL 18 2
--GGGTTCTGGGTGCTCCAA----- mirL 19 1
-----GGGTGCACCCACGAACAC----- mirR 18 3
-----TGCACCCACGAACACGCAAGAA mirR 22 1

>mmu-mir-3074-2
GTTTCCTGCTGAACTGAGCCAGTGCCTGGAATCAACTGTTTCAGCTCAGTAGGCACGGGAGGCGGAGCCCGGAGAGAGGCAGAGCCC species len reads
-GTTTCCTGCTGAACTGAGCCAGT----- mirL 22 2
-GTTTCCTGCTGAACTGAGCC----- mirL 19 1
GTTTCCTGCTGAACTGAGCCA----- mirL 21 1
---TCCTGCTGAACTGAGCCA----- mirL 18 1
-GTTTCCTGCTGAACTGAGCCAGT----- mirL 23 1
-----CCGGAGAGAGGCAGAGCCC mirR 19 1

>mmu-mir-882
GGAGAGAGTTAGCGCATTAGTGAATAGTTAGTCCTGATTTCTGGGTTTTCTAATGGCTG species len reads
---GAGAGTTAGCGCATTAGT----- mirL 18 1
GGAGAGAGTTAGCGCATT----- mirL 19 1
GGAGAGAGTTAGCGCATT----- mirL 18 1
--AGAGAGTTAGCGCATTAGTG----- mirL 20 1
-----TTCTGGGTTTTCTAATG---- mirR 18 1
-----TGGGTTTTCTAATGGCTG mirR 19 1
-----CTGGGTTTTCTAATGGC-- mirR 18 1

>mmu-mir-678
CTAGCTGCTGTATACCTGTGGACTGTGACTTGCAGAGCTGTGCTCCAATATGAGAGATGGCCATGCACCCGTCTCGGTGCAAGGACTGGAGGTGGCAGTGTGCCAGTGGACTCTGCATGGGTAGCCGCGTGAATGTC
```

```
CTAGCTGCTGTATACCTGTG-----  
-----GTGGACTGTGACTTGCAGA-----  
-----GACTCTGCATGGGTAGCC-----  
-----CGTGTAAATGTC-----  
-----CCGCGTGTAAATGTC-----  
-----GCCGCGTGTAAATGTC-----
```

>mmu-mir-1892

```
GATATATTTCTACTCTTGACCAAAGTTTTGTAAGAAACAATACAGAATTTGGGGACGGGAGGGAGGA species len reads  
GATATATTTCTACTCTTGA----- morL 19 1  
-----TGACCAAAGTTTTGTAAG----- mirL 18 1  
-----TGACCAAAGTTTTGTAAGAA----- mirL 20 1  
-----AAGAAACAATACAGAATT----- loop 18 1  
-----TTGGGGACGGGAGGGAGG----- mirR 19 1  
-----TGGGGACGGGAGGGAGGA----- mirR 18 1
```

>mmu-mir-465b-1

```
TATTTAGAATGGTGCTGATCTGATGAAATAAAAAATTGATCAGGGCCTTCTAAGTAGAGTAAGGCTTACCAACTATACATTTAATATGACTTGTAGATGAATGTTTCAGAAT species len reads  
TATTTAGAATGGTGCTGATCTG----- mirL 22 1  
-ATTTAGAATGGTGCTGATCTGA----- mirL 22 1  
-----AACTATACATTTAATATGA----- mirR 19 1  
-----TGACTTGTAGATGAATGT----- morR 18 1  
-----CTTGTAGATGAATGTTTCAGAAT morR 22 1  
-----CTTGTAGATGAATGTTCA---- morR 18 1
```

>mmu-mir-471

```
TACGTAGTATAGTGCTTTTCACATTAACAAAAAGTGAAAGGTGCCATACTATGTAT species len reads  
-ACGTAGTATAGTGCTTTT----- mirL 18 1  
TACGTAGTATAGTGCTTTT----- mirL 19 1  
-----TGAAAGGTGCCATACTAT---- mirR 18 2  
-----TGAAAGGTGCCATACTATGT-- mirR 20 1  
-----AAGGTGCCATACTATGTAT mirR 19 1
```

>mmu-mir-1902

```
TAAGTTTATTTTGGGAGTGTTGCTGTATAAATTGGACTTGATAAAATGTTTAGAGGTGCAGTAGGCATGACTTGAGTAGATAATGAGAGGAAATGCAAGTGCTCATCGACTCATGATGTGCGCCCTCCTTGCT species  
TAAGTTTATTTTGGGAGTGTT----- morL 21  
TAAGTTTATTTTGGGAGTGTT----- morL 22  
-----TTTGCTGTATAAATTGGACTTG----- mirL 21  
-----ATGTGCGCCCTCCTTGCT mirR 18  
-----ATGATGTGCGCCCTCCTT--- mirR 18
```

>mmu-mir-1950

```
TTCTGCATCTAAGGATATGGTCATTTAATGTTTTTTTCCATGATCATCTCCTTAAATGCAGAAAAAGCAGCCAGTTTCTGCTTCATTTTCCTATTTTCTAGTTACTATAAGGTATGTC species len reads  
TTCTGCATCTAAGGATATG----- mirL 19 1  
-----TAGTTACTATAAGGTATG-- mirR 18 3  
-----TAGTTACTATAAGGTATGTC mirR 20 1
```

```
-----TTAGTTACTATAAGGTATG-- mirR 19 1

>mmu-mir-871
CAGATTAGTGCCAGTCATGTGAAATACATATGACTGGCACCATTCTGGATAATGTAATGCTCACTATATTCTCAAGTGAT species len reads
CAGATTAGTGCCAGTCAT----- mirL 18 1
-----CACTATATTCTTCAAGTG-- mirR 18 4
-----TCACTATATTCTTCAAGTGAT mirR 21 1

>mmu-mir-201
TACTCAGTAAGGCATTGTTCTTCTATATTAATAAATGAACAGTGCCTTTCTGTGTAGGGTAATGTGCAACATGGACAACATTTGTGGT species len reads
TACTCAGTAAGGCATTGTTCT----- mirL 20 1
TACTCAGTAAGGCATTGTTCTT----- mirL 22 1
-----TTCTGTGTAGGGTAATGTGC----- mirR 20 1
-----TTTCTGTGTAGGGTAATG----- mirR 18 1
-----TTCTGTGTAGGGTAATGTGCA----- mirR 21 1
-----ATGGACAACATTTGTGGT morR 18 1

>mmu-mir-465b-2
TATTTAGAATGGTGTCTGATCTGATGAAATAAAAAATTGATCAGGGCCTTTCTAAGTAGAGTAAGGCTTACCAACTATACATTTAATATGACTTGTAGATGAATGTTTCTGAGAT species len reads
TATTTAGAATGGTGTCTGATCTG----- mirL 22 1
-ATTTAGAATGGTGTCTGATCTGA----- mirL 22 1
-----AACTATACATTTAATATGA----- mirR 19 1
-----TGACTTGTAGATGAATGT----- morR 18 1
-----CTTGTAGATGAATGTTTCTGAGAT morR 22 1
-----CTTGTAGATGAATGTTTCTGAGAT morR 18 1

>mmu-mir-302a
TGACTGGGCTTCCCACCCTTAAACGTGGTTGTACTTGTCTTTAGACCTAAGAAAGTAAGTGCTTCCATGTTTTGGTGATGGTATGT species len reads
TGACTGGGCTTCCCACCCT----- morL 19 1
-----TAAACGTGGTTGTACTT----- mirL 18 1
-----AAACGTGGTTGTACTTGTCTTT----- mirL 21 1
-----TAAACGTGGTTGTACTTGTCTTT----- mirL 22 1
-----TGTTTTGGTGATGGTATGT mirR 19 1
-----ATGTTTTGGTGATGGTAT-- mirR 18 1

>mmu-mir-763
TGACCAGCTGGGAAGAACCAGTGGCCCTCGGCTCTGCCTCCCAGCCAGCCATTAACCCAAGGAAATGTCTTTTGCCTGAGGTCGTTACTGCTATTATAAGCTTAAAAATGGAAAAACA species len reads
TGACCAGCTGGGAAGAACC----- mirL 18 1
-----AGGTCGTTACTGCTATTAT----- mirR 19 2
-----AGGTCGTTACTGCTATTATA----- mirR 20 1
-----ATAAGCTTAAAAATGGAAAAAC- morR 21 1
-----GCTTAAAAATGGAAAAACA morR 18 1

>mmu-mir-697
TCTTGACAGGTCTCAGAGGTGACTACCACACATTGAAGGGGTGGCGGTAACATCCTGGTCTGTGGAGACTGTCATAGTCTCCTTTATTCTATGTCAGTATTTTCTGATTTTTTCGCAT species len read
TCTTGACAGGTCTCAGAG----- mirL 18 1
```

```
---TGACAGGTCTCAGAGGTG----- mirL 18 1
-----TCAGTTCTGATTTTTCGCA- mirR 19 1
-----ATTTTCAGTTCTGATTTTT----- mirR 18 1
-----AGTTCTGATTTTTTCGCAT mirR 18 1
```

>mmu-mir-1190

```
TCTGAGAGTGTGGTGAGCTCTGGGGCCTTTGCAGACGTGGGAAGGTCTCTGCTGGCCTGATGCTTCCCCCGTCAGCTGAGGTTCCCCTCTGTCTGGGATGCTGCCTTGAGTCAGCTGAGAGACTACTACTGCCTGTGACT
--TGAGAGTGTGGTGAGCT-----
TCTGAGAGTGTGGTGAGCTC-----
-----TGGGGCCTTTGCAGACGT-----
-----TACTACTGCCTGTGACT
```

>mmu-mir-804

```
TCTTTGAGGTTACAACCTTCCCCAGTAGACTGTTTCCTGACATTCCTTGTGAGTTGTTCCCTCACCTGGAAGATGTGGTGGC species len reads
TCTTTGAGGTTACAACCT----- morL 18 1
-----TCCCCAGTAGACTGTTTC----- mirL 19 1
-----TCCTTGTGAGTTGTTCCCT----- mirR 19 1
-----CCTGGAAGATGTGGTGGC morR 18 1
-----CACCTGGAAGATGTGGTGG- morR 19 1
```

>mmu-mir-707

```
TGAGCATGGGCATGCAGTCATGCCGCTTGCCCTACGCTTGTGTGAGCATGGGCATGCGGTCATAGTTGTTGCGGGC species len reads
TGAGCATGGGCATGCAGTC----- morL 19 1
--AGCATGGGCATGCAGTCA----- morL 18 1
-----GCCGCTTGCCCTACGCTTG----- mirL 18 1
-----AGCATGGGCATGCGGTCATAGTTGTTGCGGGC mirR 32 1
-----ATGGGCATGCGGTCATAGTTGT----- mirR 22 1
```

>mmu-mir-767

```
ATCCATATAGGTTTTTACTCATGCACCATGGTTGTCTGAGCACATAACATGCTTGTCTGCTCATACCCTATGGTTCCTGAAGAGGAATCTTAACTGTCTACTGCTCTATAGGAAAACAGTGTTTTATGTATCAGTTTATAT
ATCCATATAGGTTTTTAC-----
-----TGCACCATGGTTGTCTGA-----
-----TTTTATGTATCAGTTTATAT
-----TTTTATGTATCAGTTTAT--
```

>mmu-mir-468

```
CTGAGAAAGACTGATAAGAAACTTGGCGTGTCTGACTGATGTACTGATAAGAAACTCAGTGTGATATGACTGATGTGCGTGTGTCTGTCTGGGAGGACAC species len reads
CTGAGAAAGACTGATAAG----- morL 18 1
-----AAACTTGGCGTGTCTGACT----- mirL 20 1
-----TGTCTGTCTGGGAGGACAC mirR 19 2
-----TGTGTCTGTCTGGGAGGACAC mirR 21 1
```

>mmu-mir-711

```
ACTTTGAATCTCTTCTTAGGGTGCTTCAGGCCAAAGCTGGGGACCCGGGGAGAGATGTAAGTCTGGGGAGATGTCAAGGTGGCGGGTGACTTGGGGGTCCAGGAGAGGCC species len reads
ACTTTGAATCTCTTCTTA----- mirL 18 1
ACTTTGAATCTCTTCTAG----- mirL 19 1
```

```
-----AAGGTGGCGGGTGACTTG----- mirR 18 1
-----AAGGTGGCGGGTGACTTGG----- mirR 19 1
-----TGGGGGTCCAGGAGAGGCC morR 19 1

>mmu-mir-1945
TCCCGTCAGCCCCGAGAAAACCGCACCGGGTCTTCGCGGGTACTGTCTGGGAC species len reads
TCCCGTCAGCCCCGAGA----- mirL 18 1
-----TTCGCGGGTACTGTCTGGGAC mirR 20 1
-----TCTTCGCGGGTACTGTCTGGGA- mirR 21 1
-----TCTTCGCGGGTACTGTCTGGGAC mirR 22 1
-----TCTTCGCGGGTACTGTCTG---- mirR 18 1

>mmu-mir-292
GCCTGTGATACTCAAAGTGGGGCTCTTTTGGATTTTCATCGGAAGAAAAGTGCCGCCAGTTTTGAGTGTACCCGTTGAGAAC species len reads
GCCTGTGATACTCAAAGT----- morL 19 1
-----GGGCTCTTTTGGATTTTC----- mirL 18 1
-----AGTGTACCCGTTGAGAAC mirR 19 1
-----GAGTGTACCCGTTGAGAAC mirR 20 1

>mmu-mir-669p-1
CATACACACACACACGTATAA species len reads
-ATACACACACACACGTATA- mirR 19 2
-ATACACACACACACGTATAA mirR 20 1
CATACACACACACACGTATA- mirR 20 1

>mmu-mir-684-2
ATCTGTCTTTAAGTAGGGATAAAATTACTCTTGAACAAAATGATCCTAGATAGTTTTCCCTTCAAGTCAAGTG species len reads
ATCTGTCTTTAAGTAGGGA----- mirL 19 1
--CTGTCTTTAAGTAGGGATA----- mirL 19 1
-----TTCCCTTCAAGTCAAGTG mirR 18 2

>mmu-mir-1962
TGCTGCCTCTCTCTCGTTCAGTTTCCATGGAGAGGCTGGCACT species len reads
TGCTGCCTCTCTCTCGTTCA----- mirL 21 1
-----TTCCATGGAGAGGCTGGCAC- mirR 20 2
-----CATGGAGAGGCTGGCACT mirR 18 1

>mmu-mir-3092
TCTCCCAGTTTCCTGATCTTTGTGTCTGGGAATGGGGCTGTTTCCCCTCTGTCTGCAATCTTA species len reads
TCTCCCAGTTTCCTGATC----- mirL 18 2
-----TCTGGGAATGGGGCTGTTTC----- mirR 20 1
-----TCCTGTCTGCAATCTTA morR 18 1

>mmu-mir-680-2
GACATGGGGGCCGAAGTCAGGCGCCAGGCATCGGGCACTCTGGATCTTATCTCTGGAACATGATCCTCTTGACAGCCTTGGGGGTGAGGCTGGGCTCAGGCTGACTCATGTCCTTGATGTCTGGGAAGTCTAGGAAGA
GACATGGGGGCCGAAGTCAGGC-----
```



```
-----TCATGTCCTGGATGTCATGG-----  
-----GGGAACTCAGGAAGA-----  
  
>mmu-mir-669p-2  
CATACACACACACACGTATAA species len reads  
-ATACACACACACACGTATA- mirR 19 2  
-ATACACACACACACGTATAA mirR 20 1  
CATACACACACACACGTATA- mirR 20 1  
  
>mmu-mir-302c  
GCTTTAACATGGGGTTACCTGCTGTGTTAAACAAAAGCAAGTGCTTCCATGTTTCAGTGGGGGTGCTTAAACTGTTCAACATTTTCTCTAAGATG species len reads  
GCTTTAACATGGGGTTACC----- mirL 19 2  
--TTTAAACATGGGGTTACCTGCT----- mirL 21 1  
-----TTCAACATTTTCTCTAAGATG mirR 21 1  
  
>mmu-mir-669a-3  
TCCCTTTGAATGATAAAGTGA species len reads  
TCCCTTTGAATGATAAAGTG- mirR 19 2  
-CCCTTTGAATGATAAAGTG- mirR 18 1  
-CCCTTTGAATGATAAAGTGA mirR 19 1  
  
>mmu-mir-669a-2  
TATAAACGCAAGCACACACAC species len reads  
--TAAACGCAAGCACACACAC mirR 19 2  
TATAAACGCAAGCACACAC-- mirR 19 1  
TATAAACGCAAGCACACACAC mirR 21 1  
  
>mmu-mir-669a-1  
TCCCTTTGAATGATAAAGTGA species len reads  
TCCCTTTGAATGATAAAGTG- mirR 19 2  
-CCCTTTGAATGATAAAGTGA mirR 19 1  
-CCCTTTGAATGATAAAGTG- mirR 18 1  
  
>mmu-mir-743a  
TATTCAGATTGGTGCCTGTCATGTTTATAAGAATGAAAGACACCAAGCTGAGTAGAGTAGGGCTT species len reads  
-ATTCAGATTGGTGCCTGTCAT----- mirL 21 1  
TATTCAGATTGGTGCCTGTC----- mirL 20 1  
-----CTGAGTAGAGTAGGGCTT mirR 18 1  
-----GCTGAGTAGAGTAGGGCT- mirR 18 1  
  
>mmu-mir-691  
GAAAGAAAGTTTCTTGCTGATTTATTTTGCTTTCTTCCCTGGGTCTGCTTTGAATATTCCTGAAGAGAGGCAGAAAATGTTATATTTAATATCCATATAGGATCTTCATTTTAGAATGGTGGTTTCTATCAGTATCCTCT  
GAAAGAAAGTTTCTTGCT-----  
-----GCTGATTTATTTTGCTT-----  
-----GTTTCTATCAGTATCCTCT  
-----GTGGTTTCTATCAGTATCCTC-----
```

```
>mmu-mir-875
CTCAGTTTTATCAGGTGTTTCATTAATAATCACCTGAAAATACTGAGGCT species len reads
---AGTTTTATCAGGTGTTCA----- mirL 18 1
CTCAGTTTTATCAGGTGTT----- mirL 19 1
-----TCACCTGAAAATACTGAGGCT mirR 21 1
-----TCACCTGAAAATACTGAGGC- mirR 20 1

>mmu-mir-453
AAGATGCAGGAGTGCTGTGAGAAGTCCATCCCCTGGTACTTGGAGGGAGGTTGCCTCATAGTGAGCTTGCATTATTTAATGATGCCCAATACAGGATAGACCTGTTTTCTGTATCAC species len reads
AAGATGCAGGAGTGCTGTGAG----- mirL 21 1
AAGATGCAGGAGTGCTGTGA----- mirL 20 1
-----TAGACCTGTTTTCTGTATCAC mirR 21 1
-----AGACCTGTTTTCTGTATCAC mirR 20 1

>mmu-mir-741
TAAGGCTCATAACATTCTT species len reads
TAAGGCTCATAACATTCTT mirR 19 4

>mmu-mir-463
TACCTAATTTGTTGTCATCATGTAAACATAAATGATGATAGACACCATATAAGGTAGAGGAAGGTTCACTATGTTTCATCACCTGGAACA species len reads
TACCTAATTTGTTGTCATCAT----- mirL 22 1
-----AAGGTAGAGGAAGGTTCAC----- mirR 19 1
-----CACTATGTTTCATCACCTGGAAC- morR 22 1
-----TGTTTCATCACCTGGAACA morR 18 1

>mmu-mir-654
CGCAGTGCCCTCCTCGGTAAGTGGGAAGATGGTAAGCTGCAGAACATGTGTGTTTCTCATGTCATATGTCTGCTGACCA species len reads
CGCAGTGCCCTCCTCGGT----- morL 18 1
-----TAAGTGGGAAGATGGTAA----- mirL 18 1
-----TGTCATATGTCTGCTGACCA mirR 20 1

>mmu-mir-196b
ACTGCCTTCATTACTTCAGTT species len reads
---GCCTTCATTACTTCAGTT mirR 18 2
ACTGCCTTCATTACTTCAG-- mirR 19 1

>mmu-mir-883a
ATAAGTAACTGCAACAGCTCTCAGTATTGTAAGGCTC species len reads
ATAAGTAACTGCAACAGC----- mirR 18 1
-----TCTCAGTATTGTAAGGCTC morR 19 1
-----CTCTCAGTATTGTAAGGCTC morR 20 1

>mmu-mir-432
TGGGTAGCTCTTGCAATTCCTGGTGGGGGCCACTGGATGGCTCCTCCACTTCTTGAGTAG species len reads
TGGGTAGCTCTTGCAATTT----- mirL 18 1
```

```
-----CCTCCACTTCTTGGAGTAG mirR 19 1
-----CTCCACTTCTTGGAGTAG mirR 18 1

>mmu-mir-343
GGTGTGGCGGGGGTAGCAGAGCCCAGGGCAACCTCTCCCTTCATGTGCCAGATCCTGCATGCCAACGTGGTGGTTTACAGCTACCACTACCTCC species len reads
GGTGTGGCGGGGGTAGCAG----- mirL 19 1
--TGTGGCGGGGGTAGCAGAC----- mirL 20 1
-----AACGTGGTGGTTTACAGCTACCACTACCTCC mirR 31 1

>mmu-mir-698
TGGGTGGCCCCAACTCATCTCTGCCCTCACTGTAAGGGAGGGTGGTGGCTATGTGGGTGGGACAGGGATGTTTTCAGTTGCTAAAGACATTCTCGTTTCCCTTCCCTCAGTGTCCCAGATGGTGAACCTCTACATC specie
TGGGTGGCCCCAACTCAT----- morL 1
-----CATCTCTGCCCTCACTGTAAG----- mirL 2
-----AGATGGTGAACCTCTACATC mirR 1

>mmu-mir-669a-10
TCCCTTTGAATGATAAGTG species len reads
TCCCTTTGAATGATAAGTG mirR 19 2
-CCCTTTGAATGATAAGTG mirR 18 1

>mmu-mir-1967
TCTGTTTCTTTCTCTCTTTGCTCCTTTGTCTGACATTCATGAGGATCCTGGGGAGAAGATGCAGAATTCCTGGAAATTGACTTACAGATCGTTGTGGGTGCTAGG species len reads
TCTGTTTCTTTCTCTCTTT----- mirL 19 1
--TGTTCCTTTCTCTCTTTGCT----- mirL 20 1
-----ATCGTTGTGGGTGCTAGG mirR 18 1

>mmu-mir-466a
TATGAGCACACAGGCACACAGGA species len reads
TATGAGCACACAGGCACAC---- mirR 19 2
--TGAGCACACAGGCACACAGGA mirR 21 1

>mmu-mir-669a-4
TCCCTTTGAATGATAAGTG species len reads
TCCCTTTGAATGATAAGTG mirR 19 2
-CCCTTTGAATGATAAGTG mirR 18 1

>mmu-mir-470
GCACTGGTGAGTTAACTAAATACAACCACTACCT species len reads
GCACTGGTGAGTTAACT----- loop 18 1
-----TAAATACAACCACTACCT mirR 18 2

>mmu-mir-669a-11
TCCCTTTGAATGATAAGTG species len reads
TCCCTTTGAATGATAAGTG mirR 19 2
-CCCTTTGAATGATAAGTG mirR 18 1
```

```
>mmu-mir-465c-2
GGCGCTGATCTGATGAATAAAAAAAAAAATGATCAGGGCCTTTCTAAGTAGAGTAAGGCTTACCAACTTCTACGTTTAAATGACTCGTAGATGAATATTC species len reads
GGCGCTGATCTGATGAATA-----mirL 19 2
-----GACTCGTAGATGAATATTC mirR 19 1

>mmu-mir-1936
AGGGGAGGCCAGTCACACAGAGGACTTTAGTCTGAGAAATTGAACTAACTGACCTGCTGTGAACTGGCCTCATGACCCCTGAGCTGCACTCTGATATCTGGGGTCATTCTTGACACTCACTGCCTTCCTGA specie
AGGGGAGGCCAGTCACAC-----mirL 1
-----CACTCACTGCCTTCCTGA mirR 1

>mmu-mir-687
GCAGCAATGAATCCTGGGTTATTGTTTCAGTCTGTCATTGTATTCTTGGAA species len reads
GCAGCAATGAATCCTGGG-----mirL 18 1
-----TCTGTCATTGTATTCTTG--- mirR 18 1
-----TCTGTCATTGTATTCTTGGAA mirR 21 1

>mmu-mir-669a-9
TCCCTTTGAATGATAAGTG species len reads
TCCCTTTGAATGATAAGTG mirR 19 2
-CCCTTTGAATGATAAGTG mirR 18 1

>mmu-mir-669a-8
TCCCTTTGAATGATAAGTG species len reads
TCCCTTTGAATGATAAGTG mirR 19 2
-CCCTTTGAATGATAAGTG mirR 18 1

>mmu-mir-465c-1
GGCGCTGATCTGATGAATAAAAAAAAAAATGATCAGGGCCTTTCTAAGTAGAGTAAGGCTTACCAACTTCTACGTTTAAATGACTCGTAGATGAATATTC species len reads
GGCGCTGATCTGATGAATA-----mirL 19 2
-----GACTCGTAGATGAATATTC mirR 19 1

>mmu-mir-669a-7
TCCCTTTGAATGATAAGTG species len reads
TCCCTTTGAATGATAAGTG mirR 19 2
-CCCTTTGAATGATAAGTG mirR 18 1

>mmu-mir-669a-6
TCCCTTTGAATGATAAGTG species len reads
TCCCTTTGAATGATAAGTG mirR 19 2
-CCCTTTGAATGATAAGTG mirR 18 1

>mmu-mir-467a-5
TGTGCCTGTGTGCGTAAGTGC species len reads
---GCCTGTGTGCGTAAGTGC mirL 18 1
TGTGCCTGTGTGCGTAAG--- mirL 18 1
```

```
>mmu-mir-669a-5
CCCTTAGAATGATAAGTG species len reads
CCCTTAGAATGATAAGTG mirR 18 2

>mmu-mir-2139
TGTCCGCAGCTGCGCTGCTCCTGGTAACTGCGGCT species len reads
TGTCCGCAGCTGCGCTGC----- mirR 18 1
-----CTCCTGGTAACTGCGGCT morR 18 1

>mmu-mir-467a-9
TGTGCCTGTGTGCGTAAGTGC species len reads
---GCCTGTGTGCGTAAGTGC mirL 18 1
TGTGCCTGTGTGCGTAAG--- mirL 18 1

>mmu-mir-467a-4
TGTGCCTGTGTGCGTAAGTGC species len reads
---GCCTGTGTGCGTAAGTGC mirL 18 1
TGTGCCTGTGTGCGTAAG--- mirL 18 1

>mmu-mir-680-1
GACATGGGGGCCGAAGTCAGGCGCCAGGAAGCGGGCACTTTGCATCTTATCTCCGGAACATCGATCCTCTTGACAGCCTTGGGTGTCAGGCTGGGCTCACTTGTGACTCATGTCCTCGGATGTCATGGGAACT species
GACATGGGGGCCGAAGTCAGGC----- mirL 22
-----TCGGATGTCATGGGAACT mirR 18

>mmu-mir-467a-2
TGTGCCTGTGTGCGTAAGTGC species len reads
---GCCTGTGTGCGTAAGTGC mirL 18 1
TGTGCCTGTGTGCGTAAG--- mirL 18 1

>mmu-mir-466b-7
TTGCGTGATAAGTGAAGT species len reads
-TTGCGTGATAAGTGAAGT mirR 18 1
TTGCGTGATAAGTGAAGT- mirR 18 1

>mmu-mir-467a-8
TGTGCCTGTGTGCGTAAGTGC species len reads
---GCCTGTGTGCGTAAGTGC mirL 18 1
TGTGCCTGTGTGCGTAAG--- mirL 18 1

>mmu-mir-466b-2
GATGTGTGTGTACATGTACATGTC species len reads
-ATGTGTGTGTACATGTACATGTC mirL 23 1
GATGTGTGTGTACATGTACATGTC mirL 24 1

>mmu-mir-467a-7
TGTGCCTGTGTGCGTAAGTGC species len reads
```

```
---GCCTGTGTGCGTAAGTGC mirL 18 1  
TGTGCCTGTGTGCGTAAG--- mirL 18 1
```

```
>mmu-mir-467a-3  
ATGCGGAAATGGCCTTCA species len reads  
ATGCGGAAATGGCCTTCA mirR 18 1
```

```
>mmu-mir-467a-6  
ATGCGGAAATGGCCTTCA species len reads  
ATGCGGAAATGGCCTTCA mirR 18 1
```

```
>mmu-mir-467a-1  
AGACATGCGGGAATAGCC species len reads  
AGACATGCGGGAATAGCC mirR 18 1
```

```
>mmu-mir-466b-3  
CAAATACATACACGCACAC species len reads  
CAAATACATACACGCACAC mirR 19 1
```

```
>mmu-mir-464  
GGGTACTACCAAGTTTATT species len reads  
GGGTACTACCAAGTTTATT mirR 19 1
```

```
>mmu-mir-467a-10  
ATGCGGAAATGGCCTTCA species len reads  
ATGCGGAAATGGCCTTCA mirR 18 1
```
